# Supplementary material for: Development of a cross-platform biomarker signature to detect renal transplant tolerance in humans
Source: JCI journal article supplement (doi:10.1172/jci39922), 2010-05-24
Supplement: sd1 [file 1]

Supplemental Figure 1

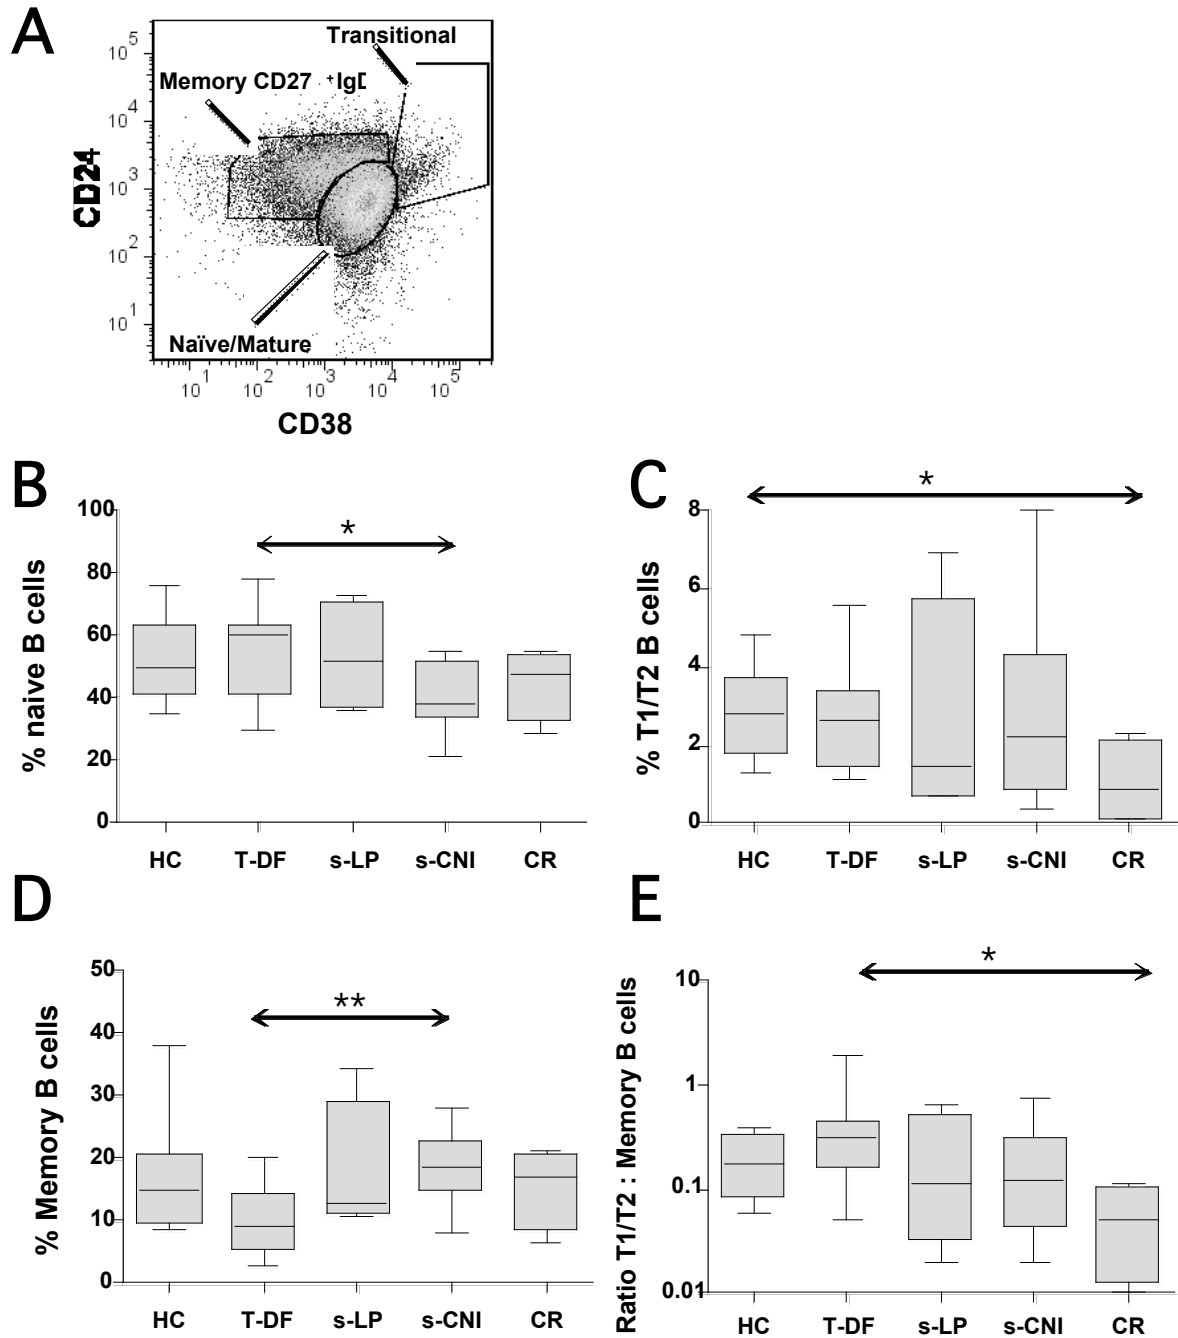

**Supplemental Figure 1. Flow cytometry analysis of peripheral blood B cell subsets in *training* and *test set* patients.** (A) B cell subsets were analysed by gating on CD19<sup>+</sup> lymphocytes and defined as follows: late-memory B cells CD19<sup>+</sup>CD27<sup>+</sup>IgD<sup>-</sup>CD24<sup>+</sup>CD38<sup>-int</sup>; naïve/mature B cells CD19<sup>+</sup>CD27<sup>-</sup>CD24<sup>int</sup>CD38<sup>int</sup>; T1/T2 transitional B cells CD19<sup>+</sup>CD27<sup>-</sup>CD24<sup>+</sup>CD38<sup>hi</sup>. Percentages of naïve B cells (B), T1/T2 transitional B cells (C) and memory B cells (D) of total B cells. Ratio of the percentage of T1/T2 transitional: memory B cells (E). Box-plots show median and interquartile range. Whiskers above and below the box indicate the 5<sup>th</sup> and 95<sup>th</sup> percentiles. When significant, p

values for 2-tailed Mann-Whitney U test comparisons between groups are shown (\*  $p < 0.05$ , \*\*  $p < 0.01$ ).

## Supplemental Figure 2

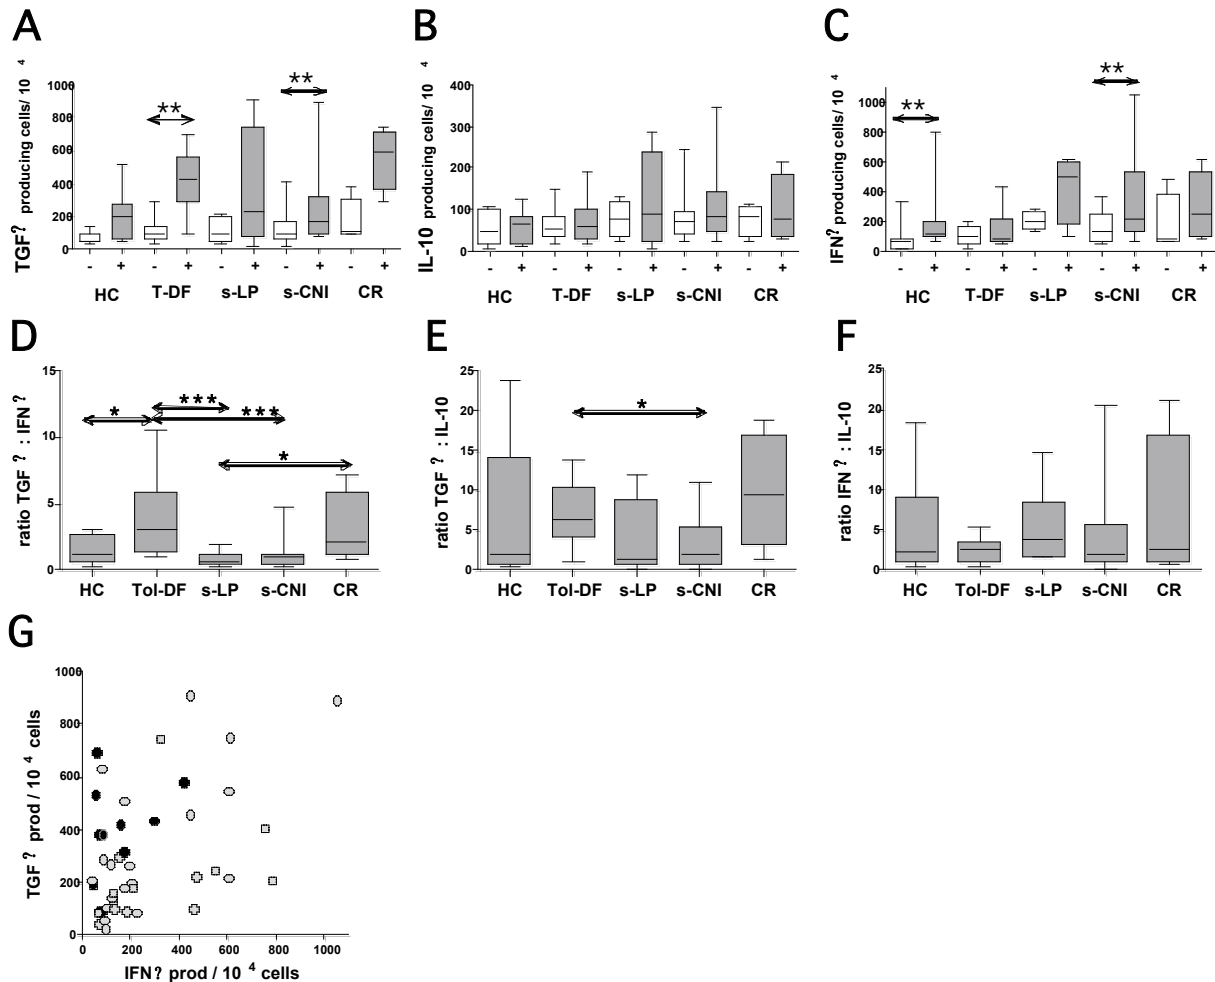

**Supplemental Figure 2. Analysis of B cell cytokine production by intracellular cytokine staining.** B cell production of (A) TGF $\beta$ , (B) IL-10 and (C) IFN $\gamma$  was assessed by intracellular cytokine staining after *in vitro* stimulation of PBMC with phorbol 12-myristate 13-acetate and ionomycin. Results are expressed as the number of cytokine producing B cells (gated on CD19 $^+$  lymphocytes) detected per  $1 \times 10^4$  B cells analysed by flow cytometry in stimulated (+) and unstimulated (-) cultures, with median and interquartile range shown for each group. Whiskers above and below the box indicate the 5 $^{\text{th}}$  and 95 $^{\text{th}}$  percentiles. Figures (D-F) show the number of cytokine producing cells per  $1 \times 10^4$  stimulated B cells expressed as a ratio of each cytokine response. Figure G shows TGF $\beta$  and IFN $\gamma$  cell cytokine responses, where each patient is represented by a filled circle and black filled circles represent Tol-DF patients, showing that B cells of Tol-DF patients have a higher capacity to produce TGF $\beta$  rather than IFN $\gamma$ . P values for Wilcoxon-matched pair test (A-C) and 2-tailed Mann-Whitney U test comparisons between groups

(D-F) are shown (\* $p < 0.05$ , \*\* $p < 0.01$ , \*\*\* $p < 0.001$ ). Sample n: HC=8, Tol-DF=10, s-LP=8, s-CNI=16, CR=4.

### Supplemental Figure 3

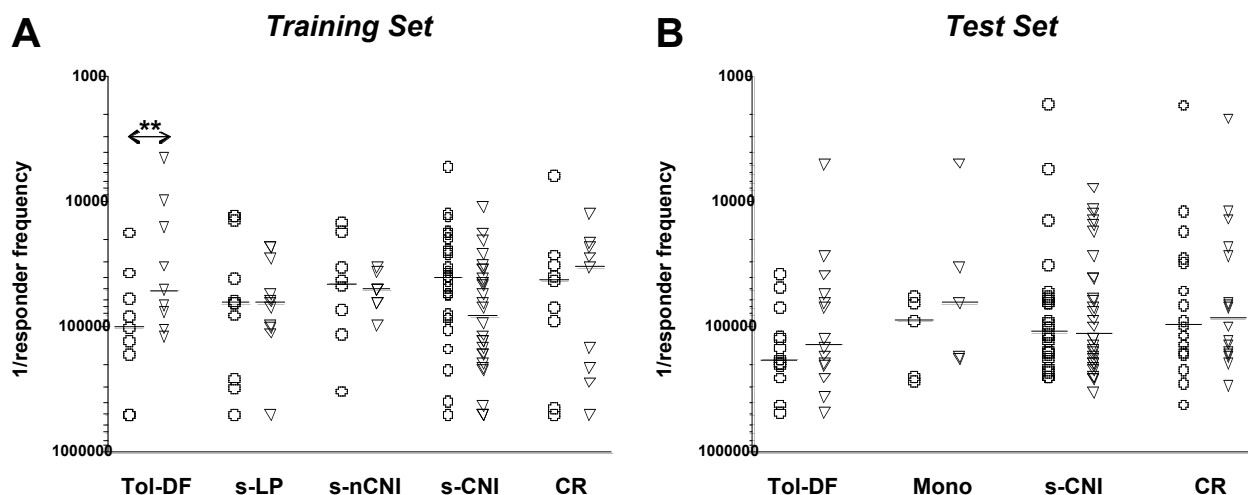

### Supplemental Figure 3

**Assessment of direct pathway alloresponses in renal transplant patient groups by IFN\_ ELISpot analysis.** Cellular functional assays detecting direct pathway alloresponses by IFN\_ ELISpot in the (A) *training* and (B) *test sets*. The number of IFN\_ producing cells in recipient CD4<sup>+</sup> T cells was calculated. Data shows the frequency (1 responder / n cells) and median group frequency (black bar) of T cell responses to donor APCs (\_ anti-Donor response) or equally mismatched 3<sup>rd</sup> Party APCs (santi-3<sup>rd</sup>P response) after deducting background. Two-sided p values for Wilcoxon-matched paired test (\*\*  $p < 0.01$ ) between donor and 3<sup>rd</sup>P frequencies is shown.

Supplemental Figure 4

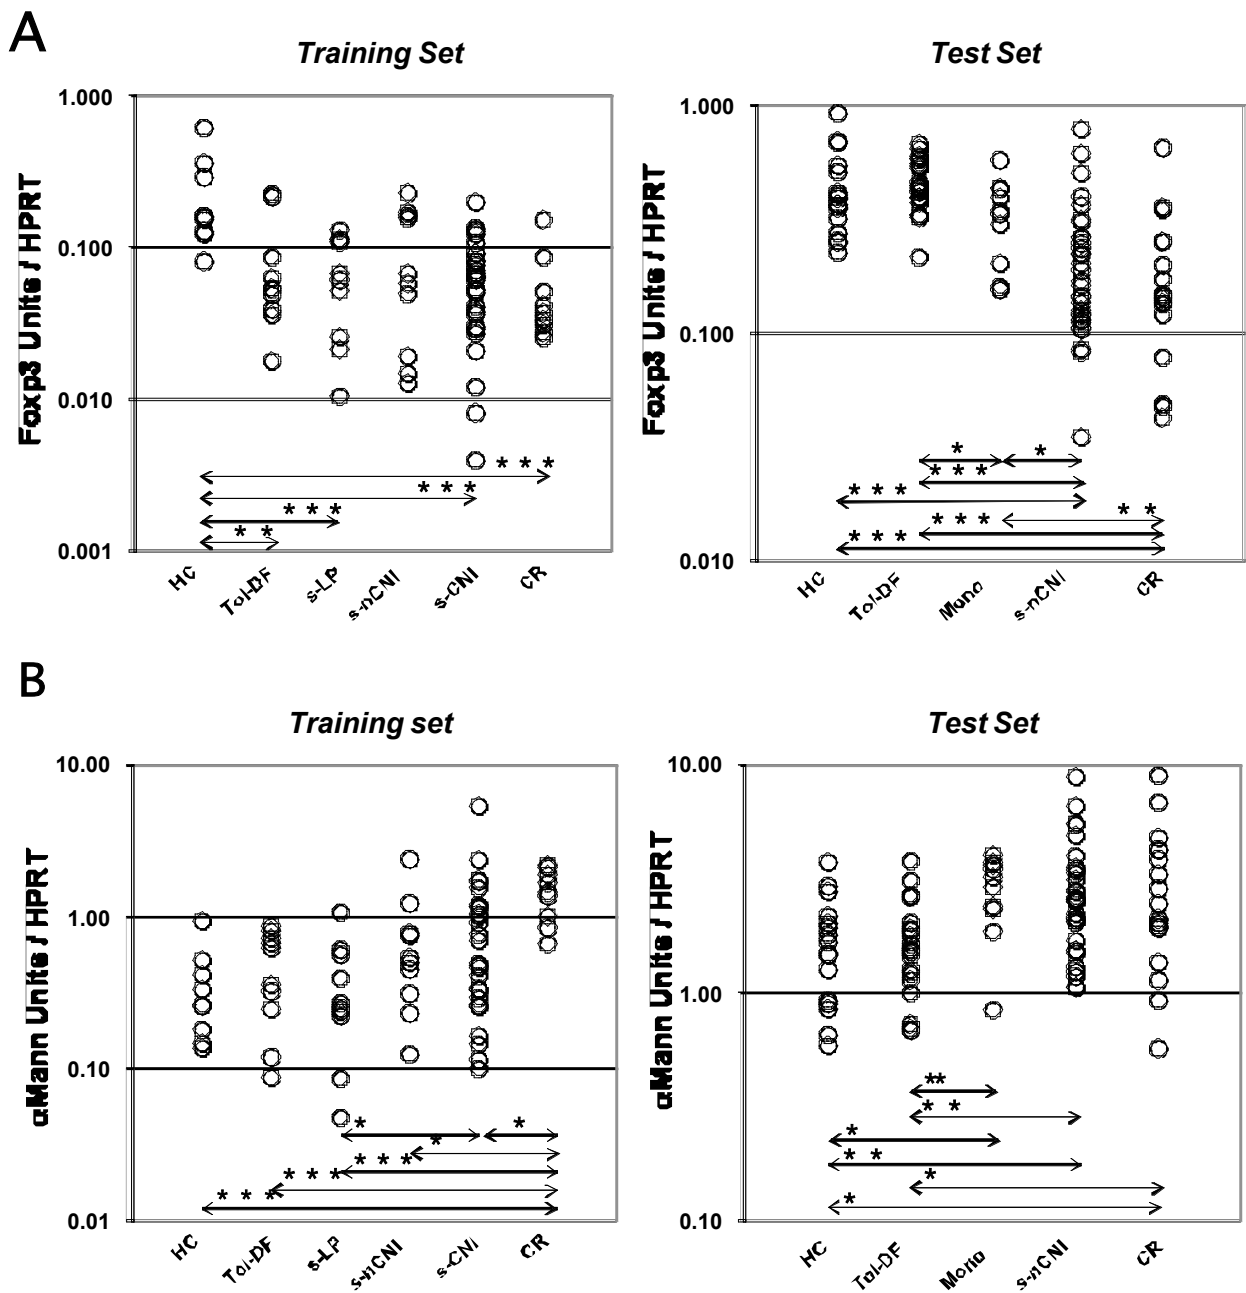

Supplemental Figure 4. QRT-PCR gene expression analysis of peripheral blood expression of FoxP3 and  $\alpha$ -1,2-mannosidase. QRT-PCR analysis of (A) FoxP3 and (B)  $\alpha$ -1,2-mannosidase expression in whole peripheral blood samples of the *training* and *test sets*. Expression levels of FoxP3 and  $\alpha$ -1,2-mannosidase are expressed as units relative to the expression of HPRT. When significant, p values for 2-tailed Mann-Whitney U test comparisons between groups are shown (\*  $p < 0.05$ , \*\*  $p < 0.01$ , \*\*\*  $p < 0.001$ ).

**Supplemental Figure 5. Median of log-fold change in expression of all probes identified with significant differential expression in patient groups of the *training* and *test sets*.** Plots showing the median of log-fold change in expression (relative to median of all samples) of differentially expressed probes for each patient group of the (A) *training* and (B) *test sets*, for all probes detected to be significantly differentially expressed by microarray analysis when ranked on 1% FDR. Box-plots show median and interquartile range. Whiskers above and below the box indicate the 5<sup>th</sup> and 95<sup>th</sup> percentiles.

Figure 5A

Rank 1 : CD79B  
2.8957e-08

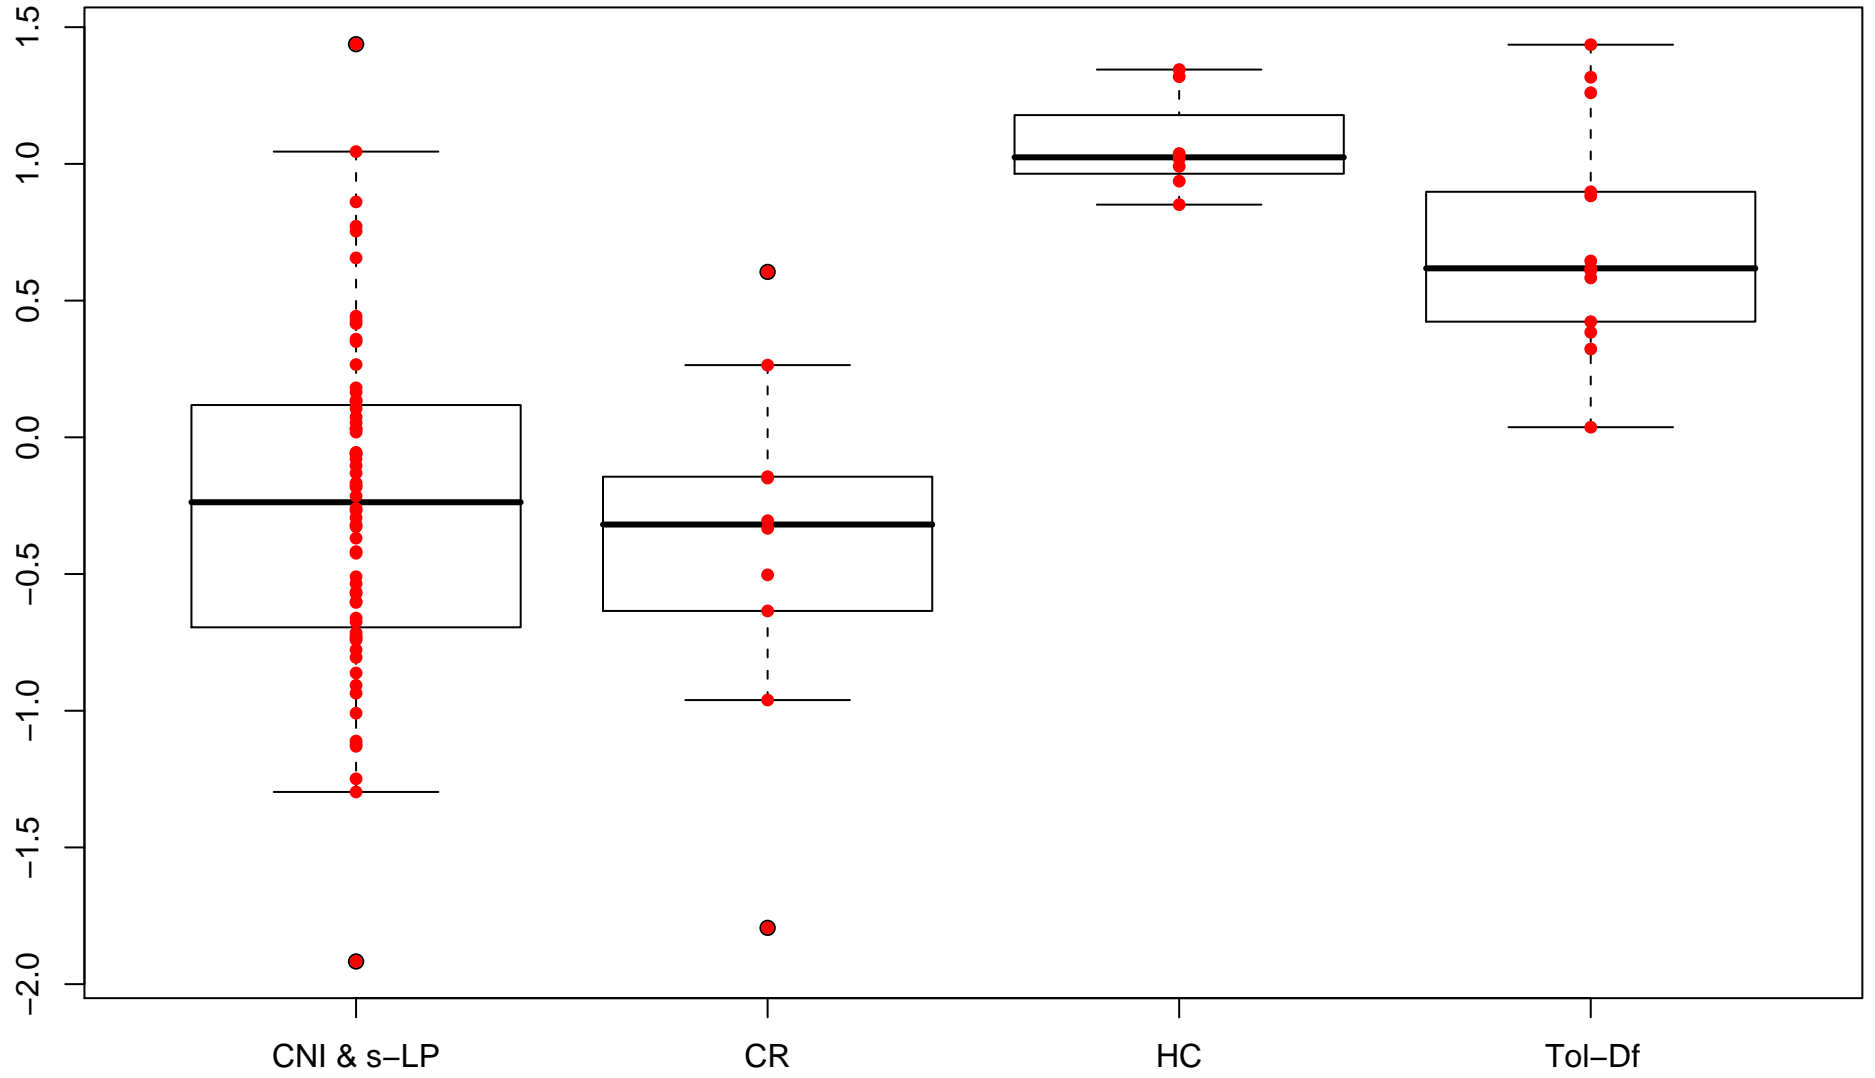

Rank 2 : TCL1A  
9.502e-08

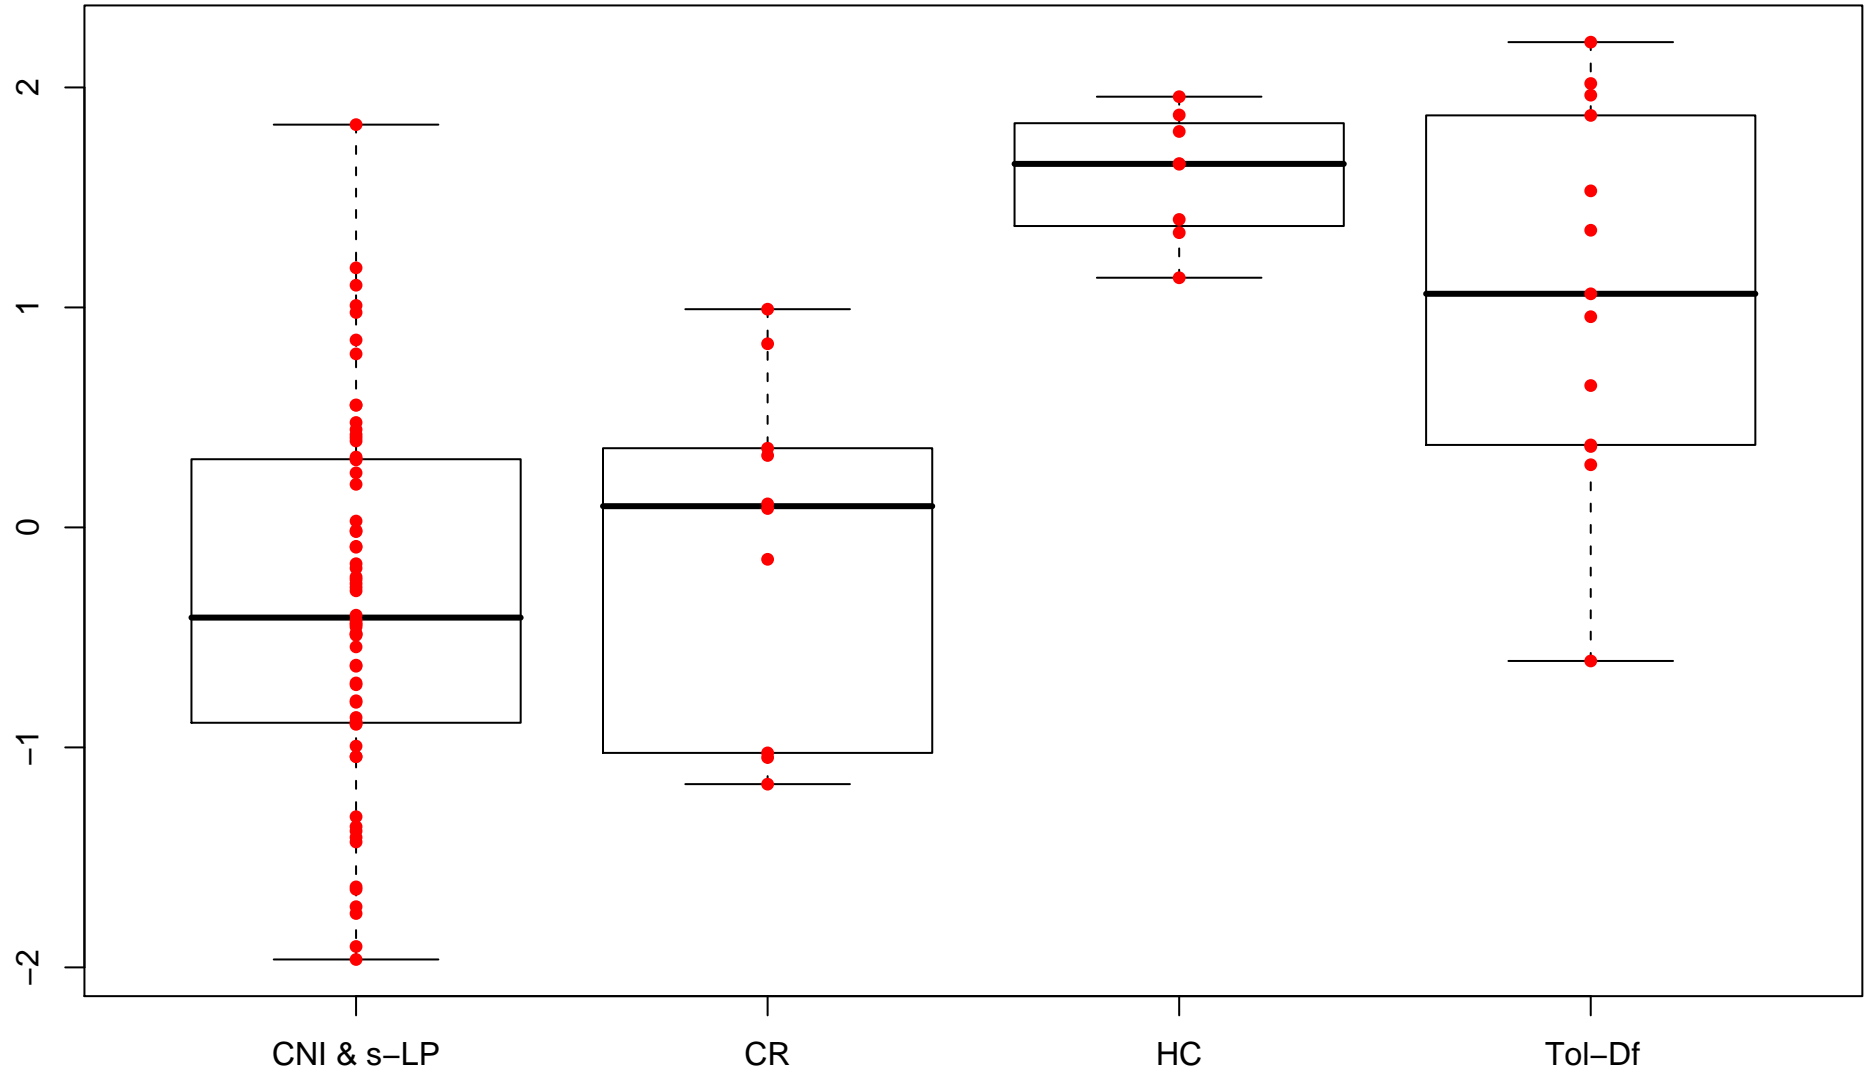



Rank 3 : HS3ST1  
1.0893e-07

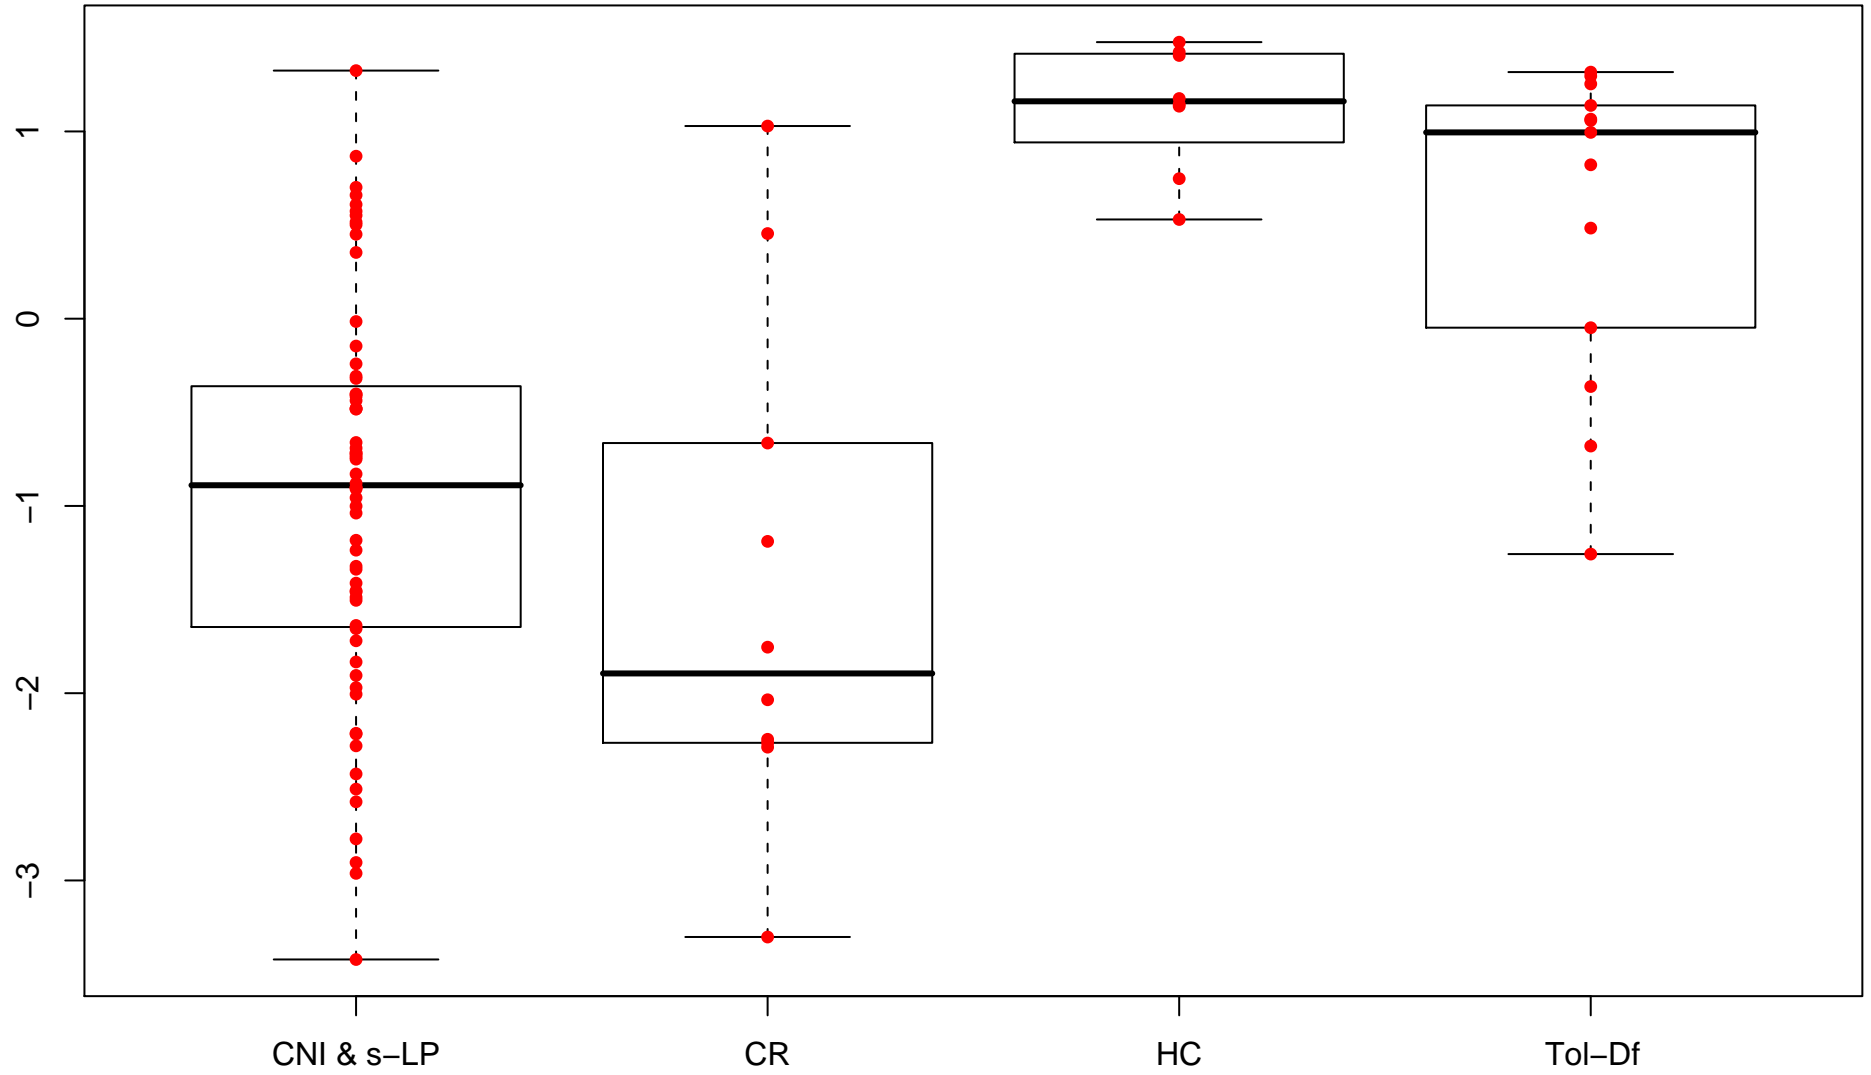

Rank 4 : TCL1A  
1.2363e-07

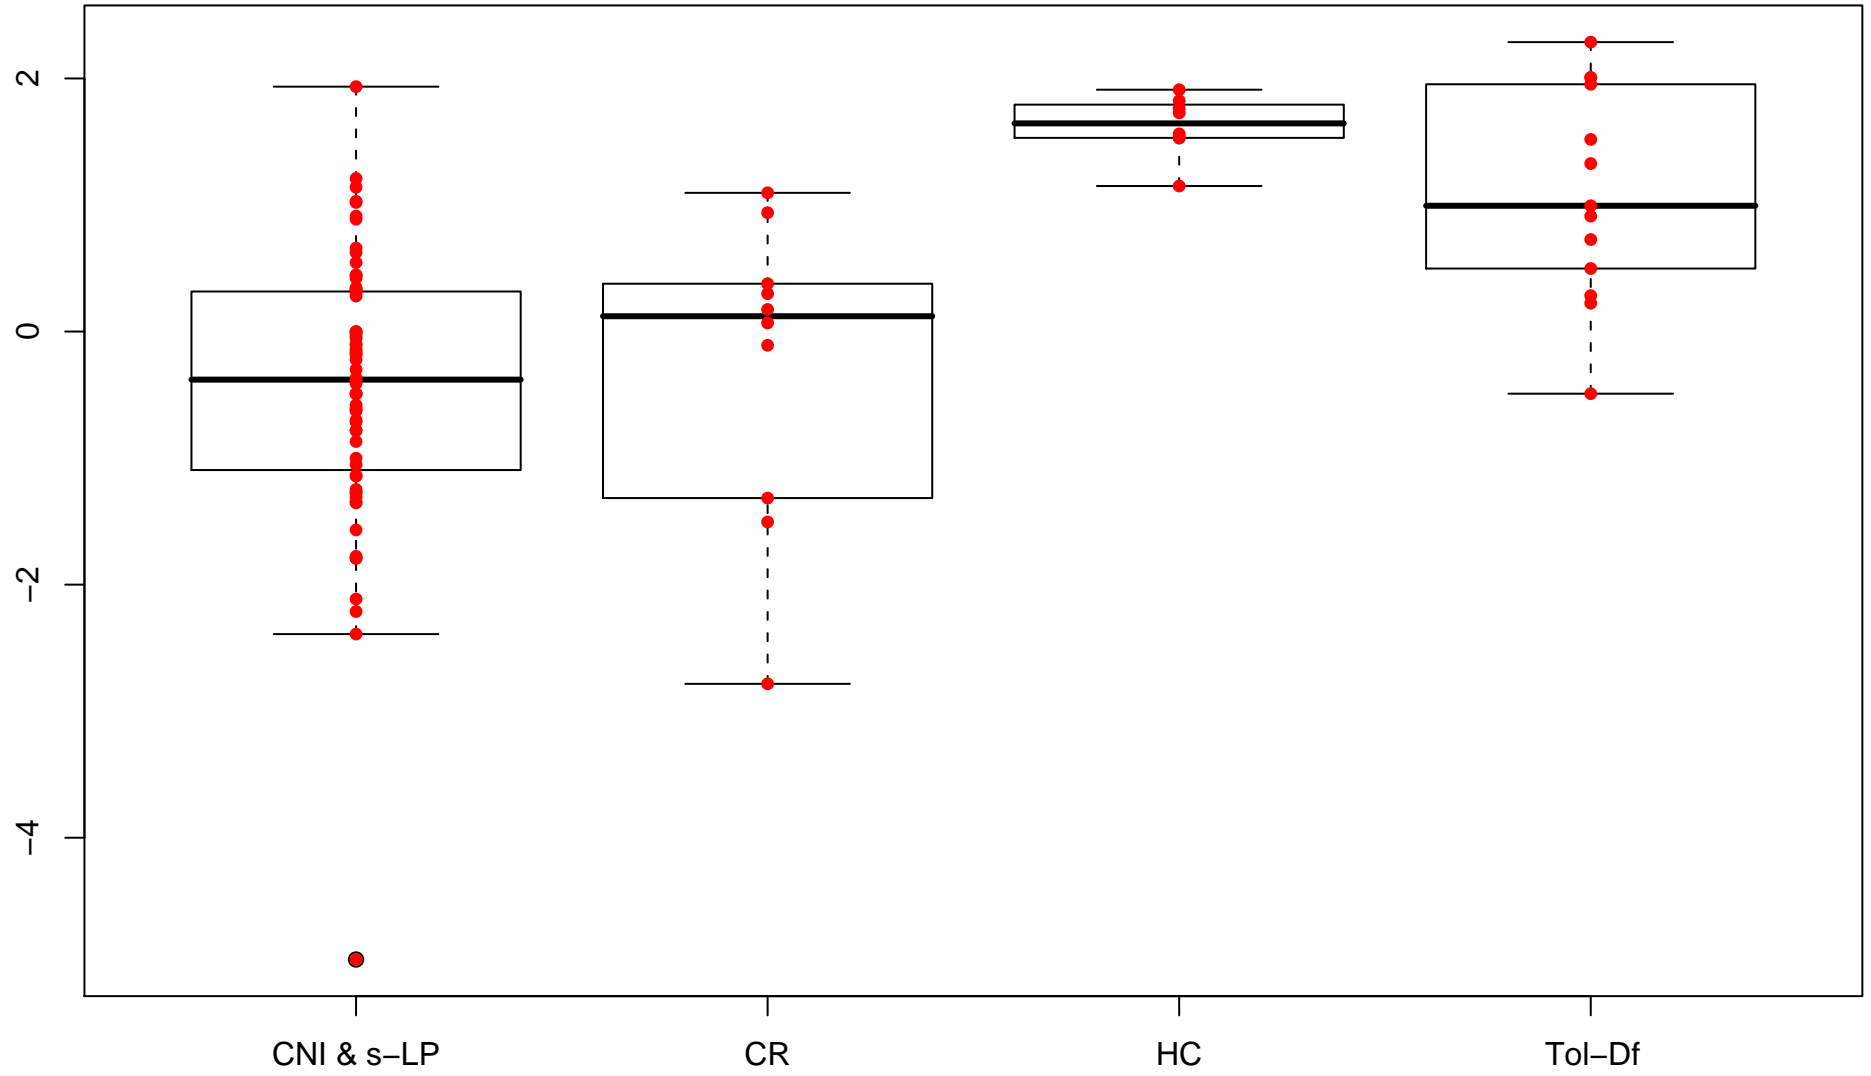

Rank 5 : SH2D1B  
1.9033e-07

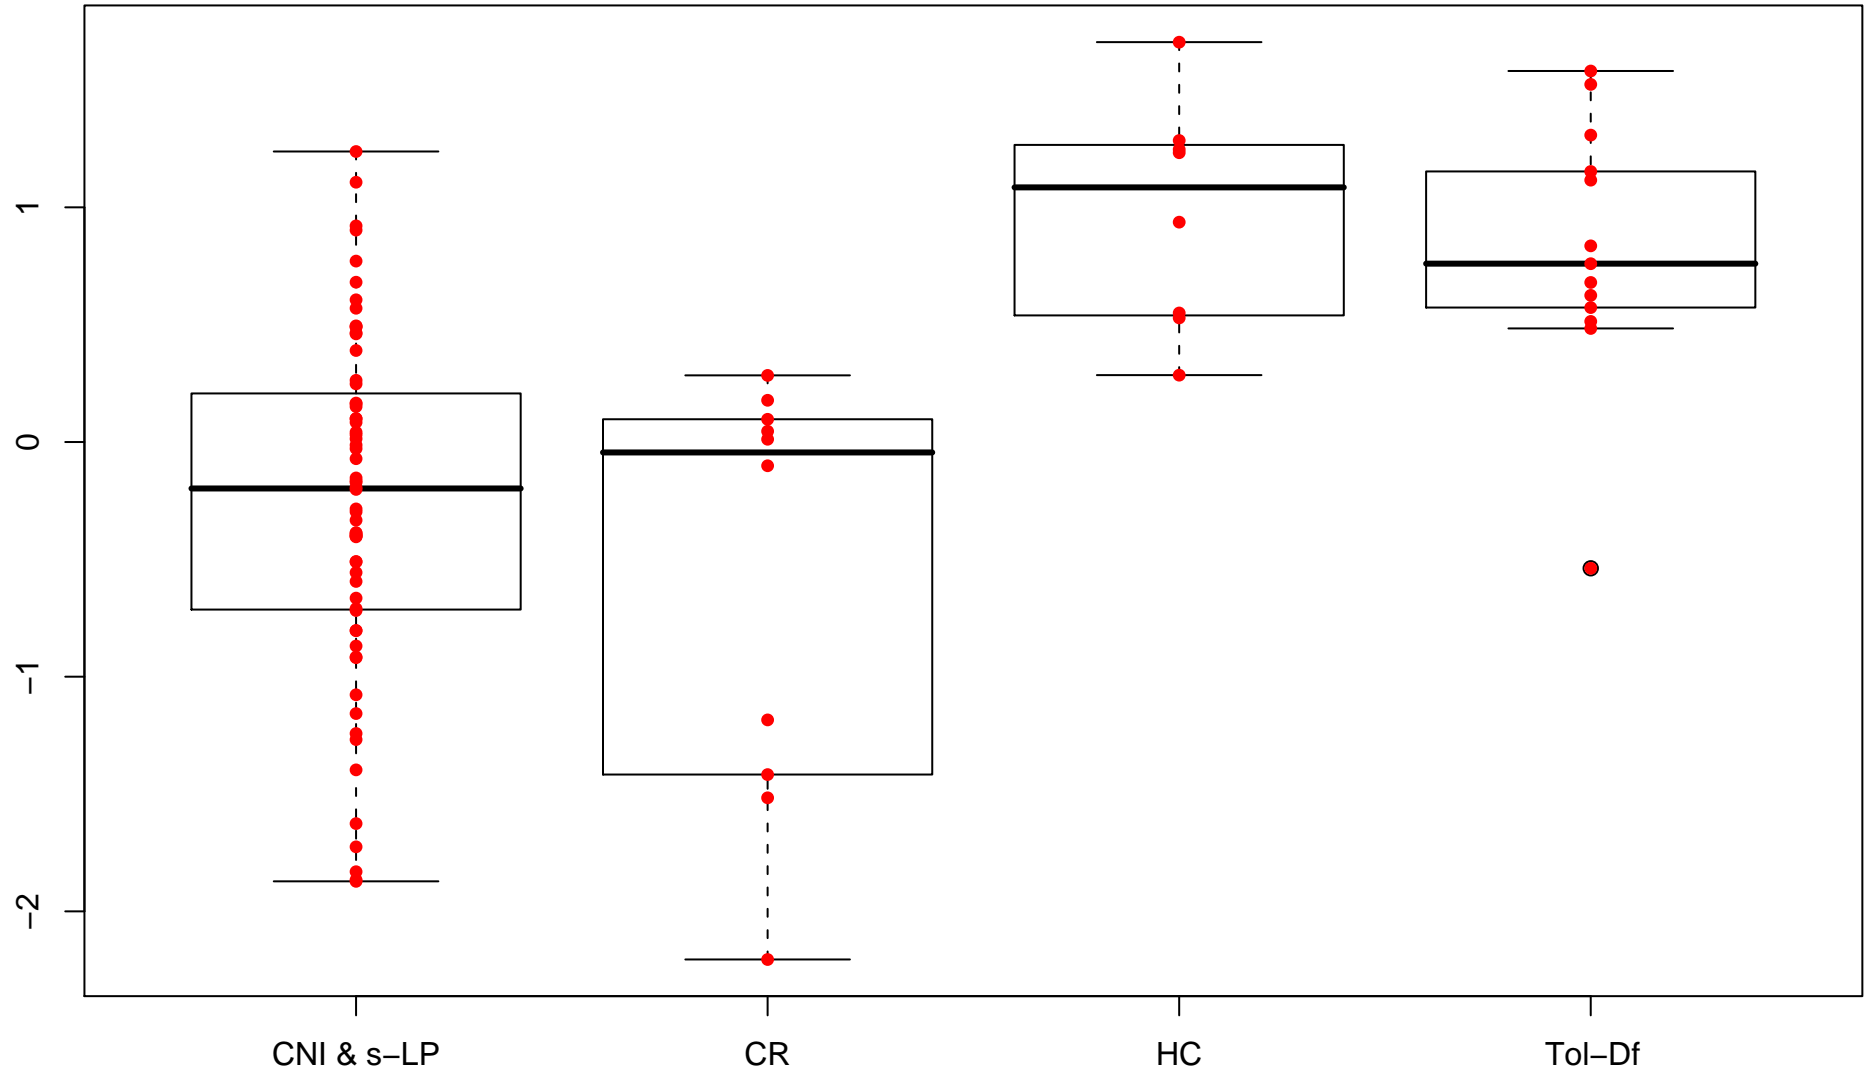

Rank 6 : MS4A1  
2.2974e-07

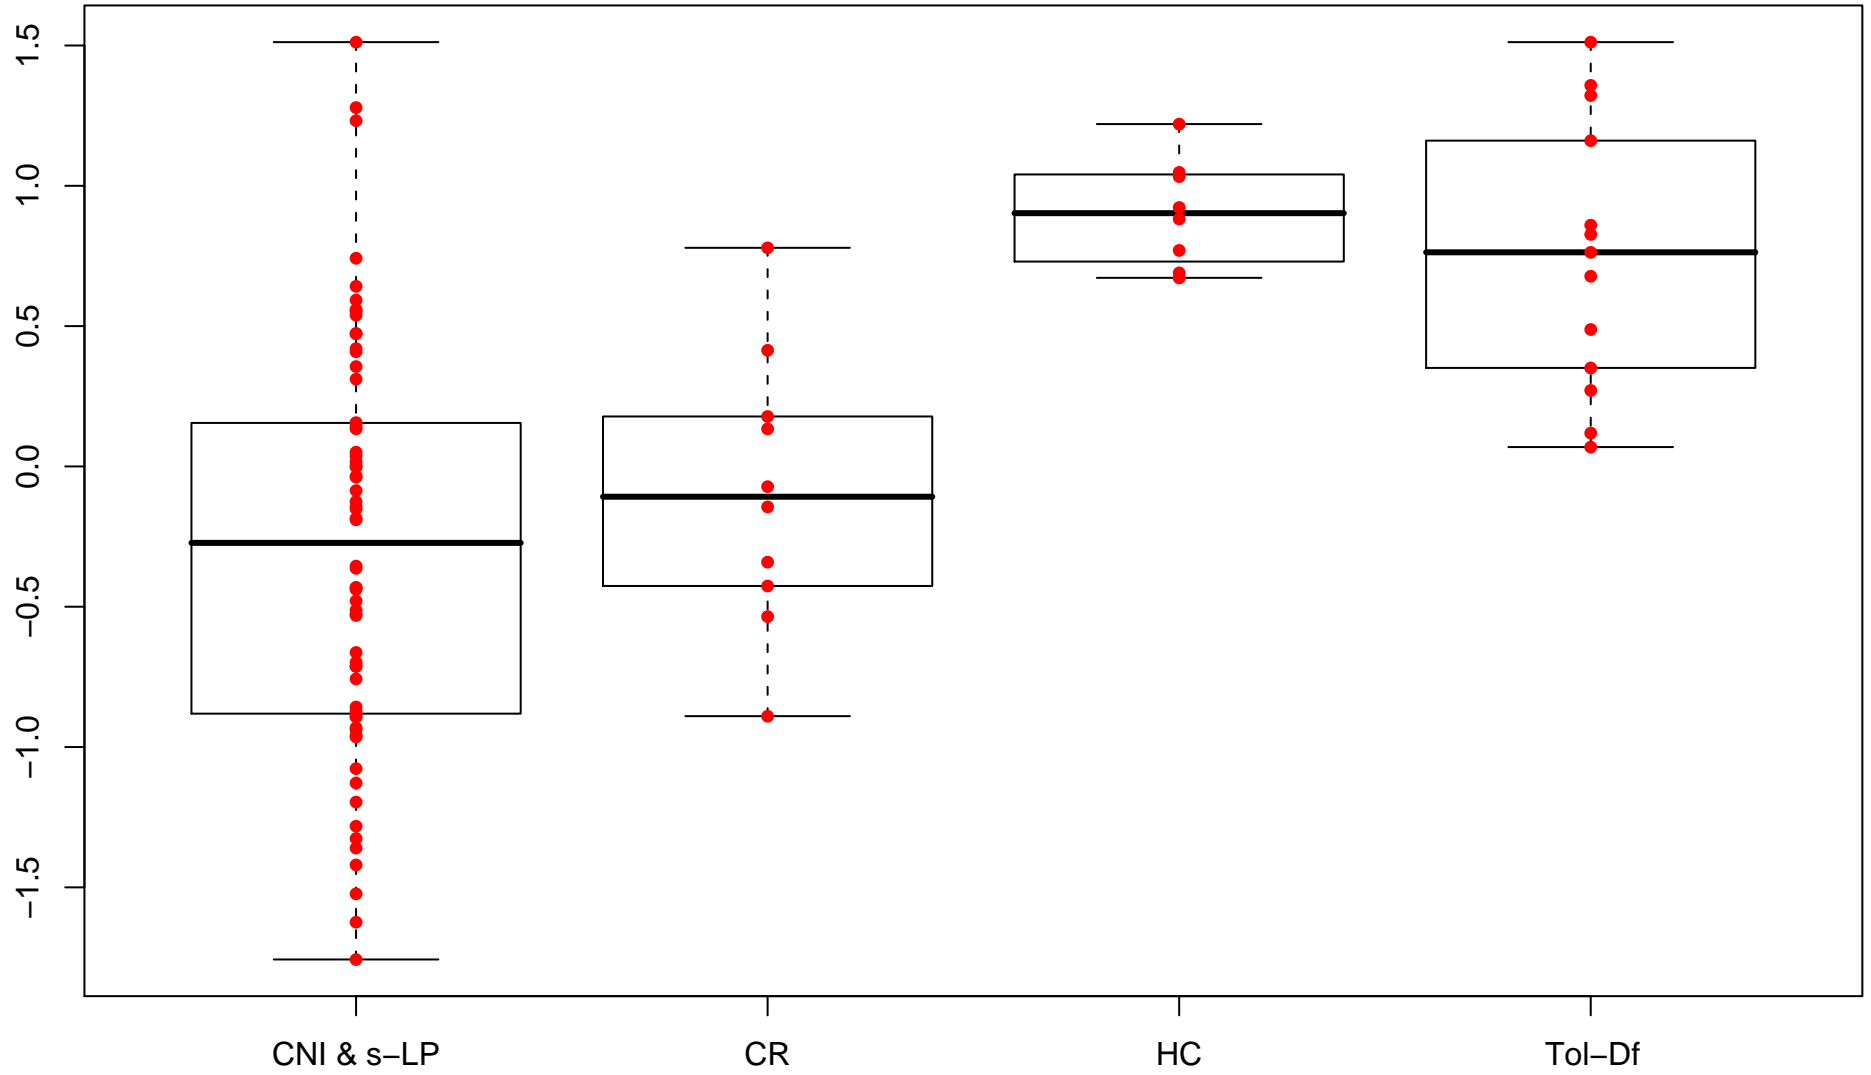

Rank 7 : TLR5  
3.287e-07

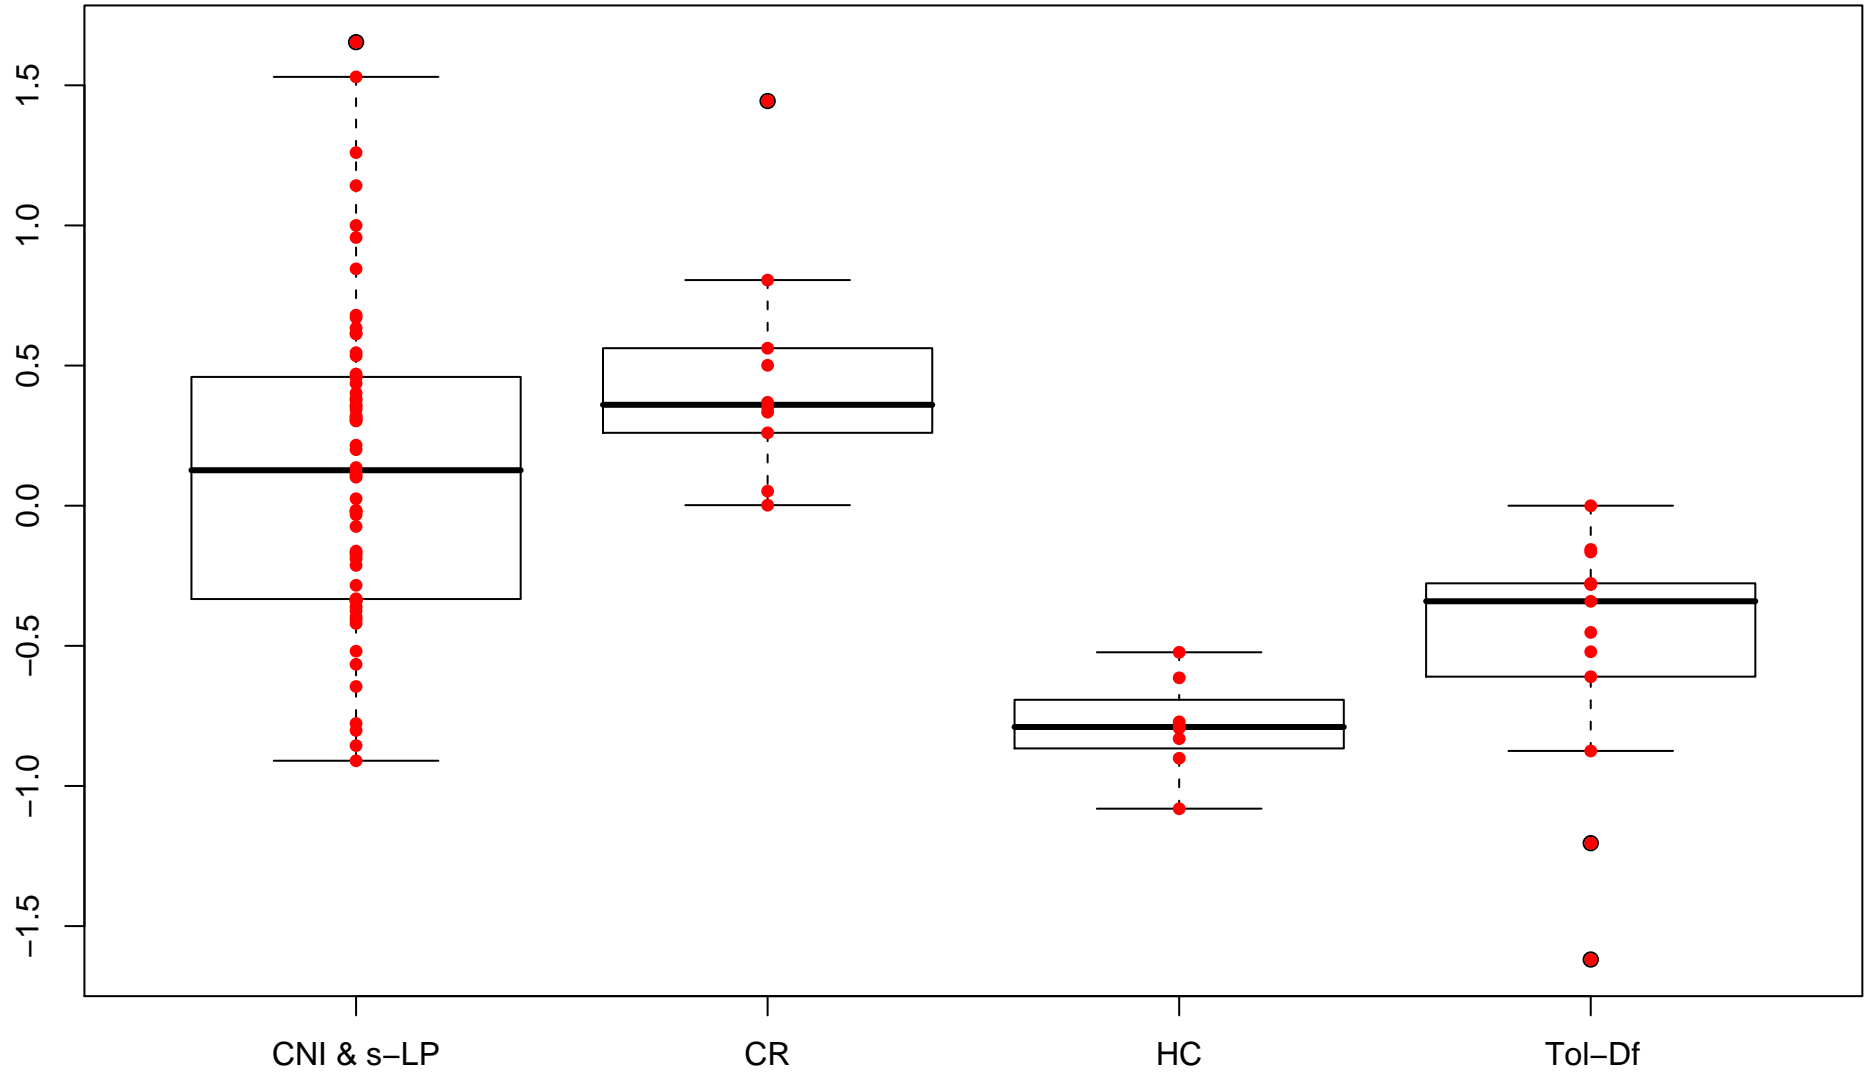

Rank 8 : THC2438936  
3.336e-07

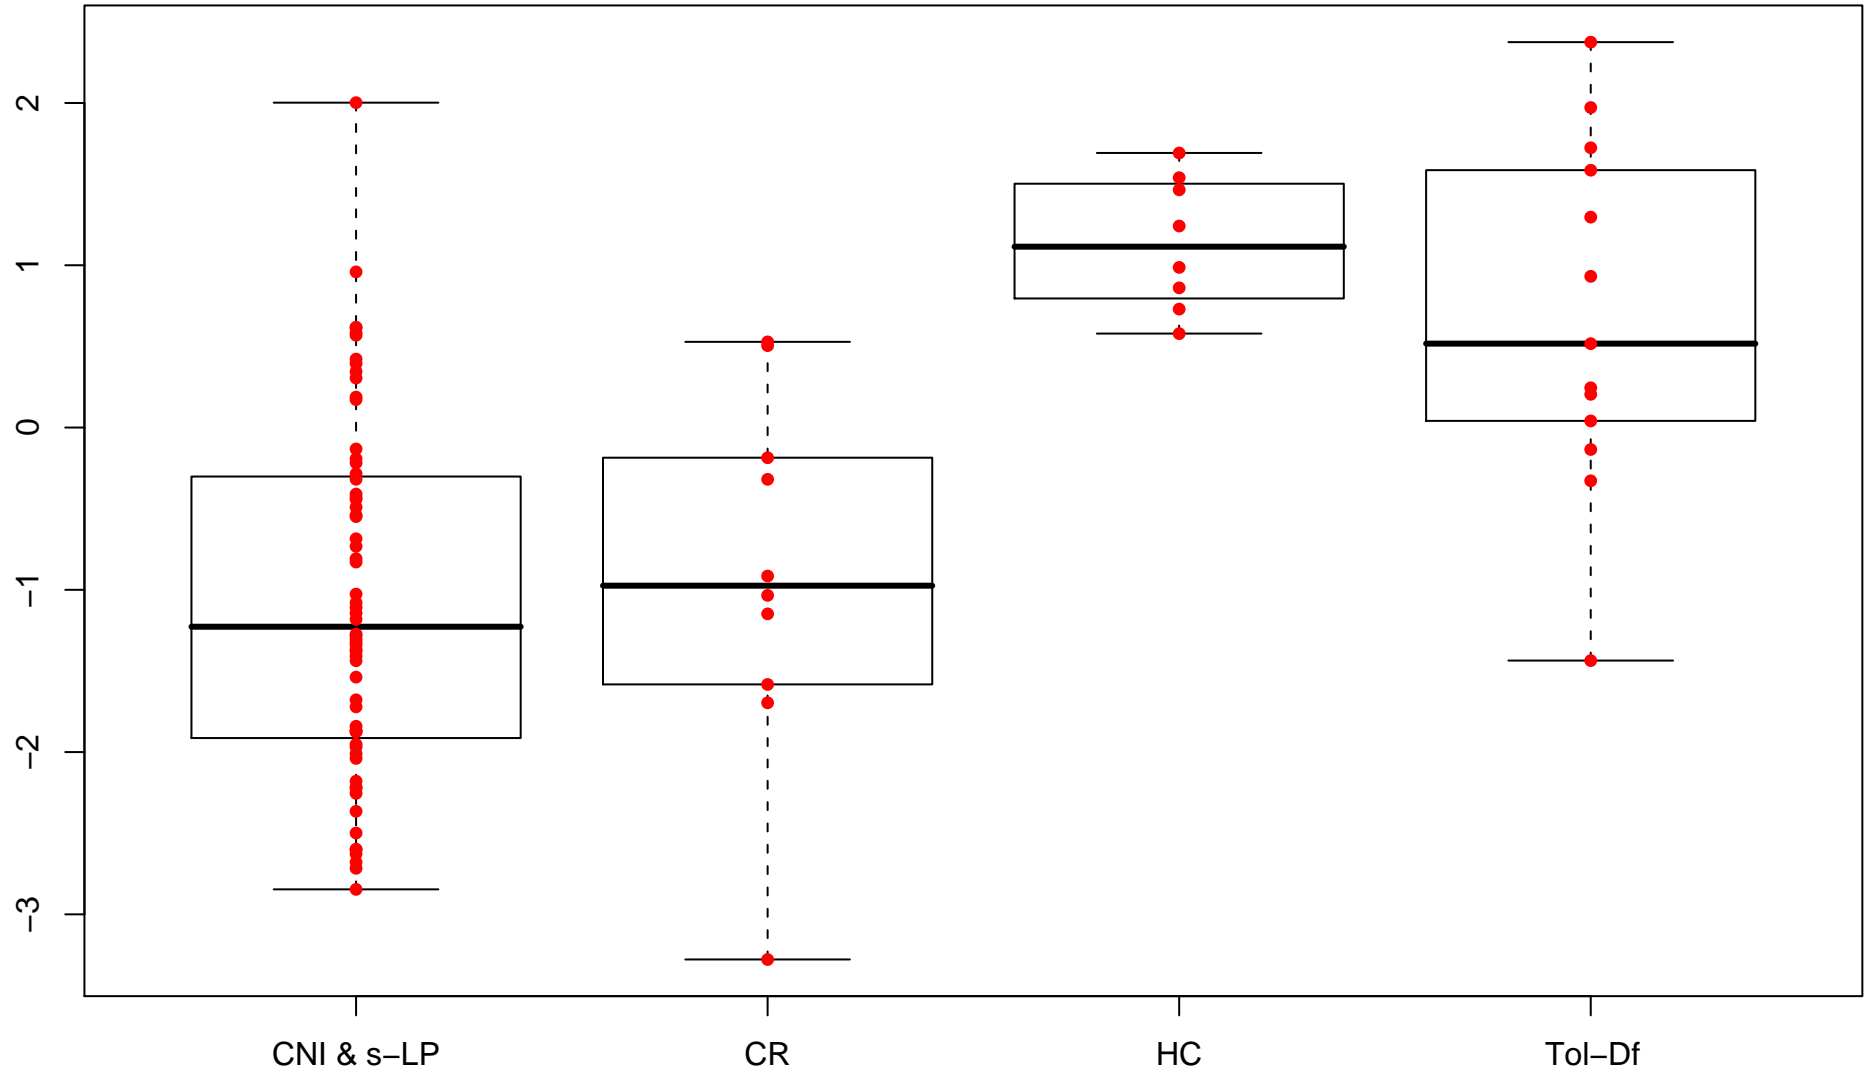

Rank 9 : PNOC  
6.035e-07

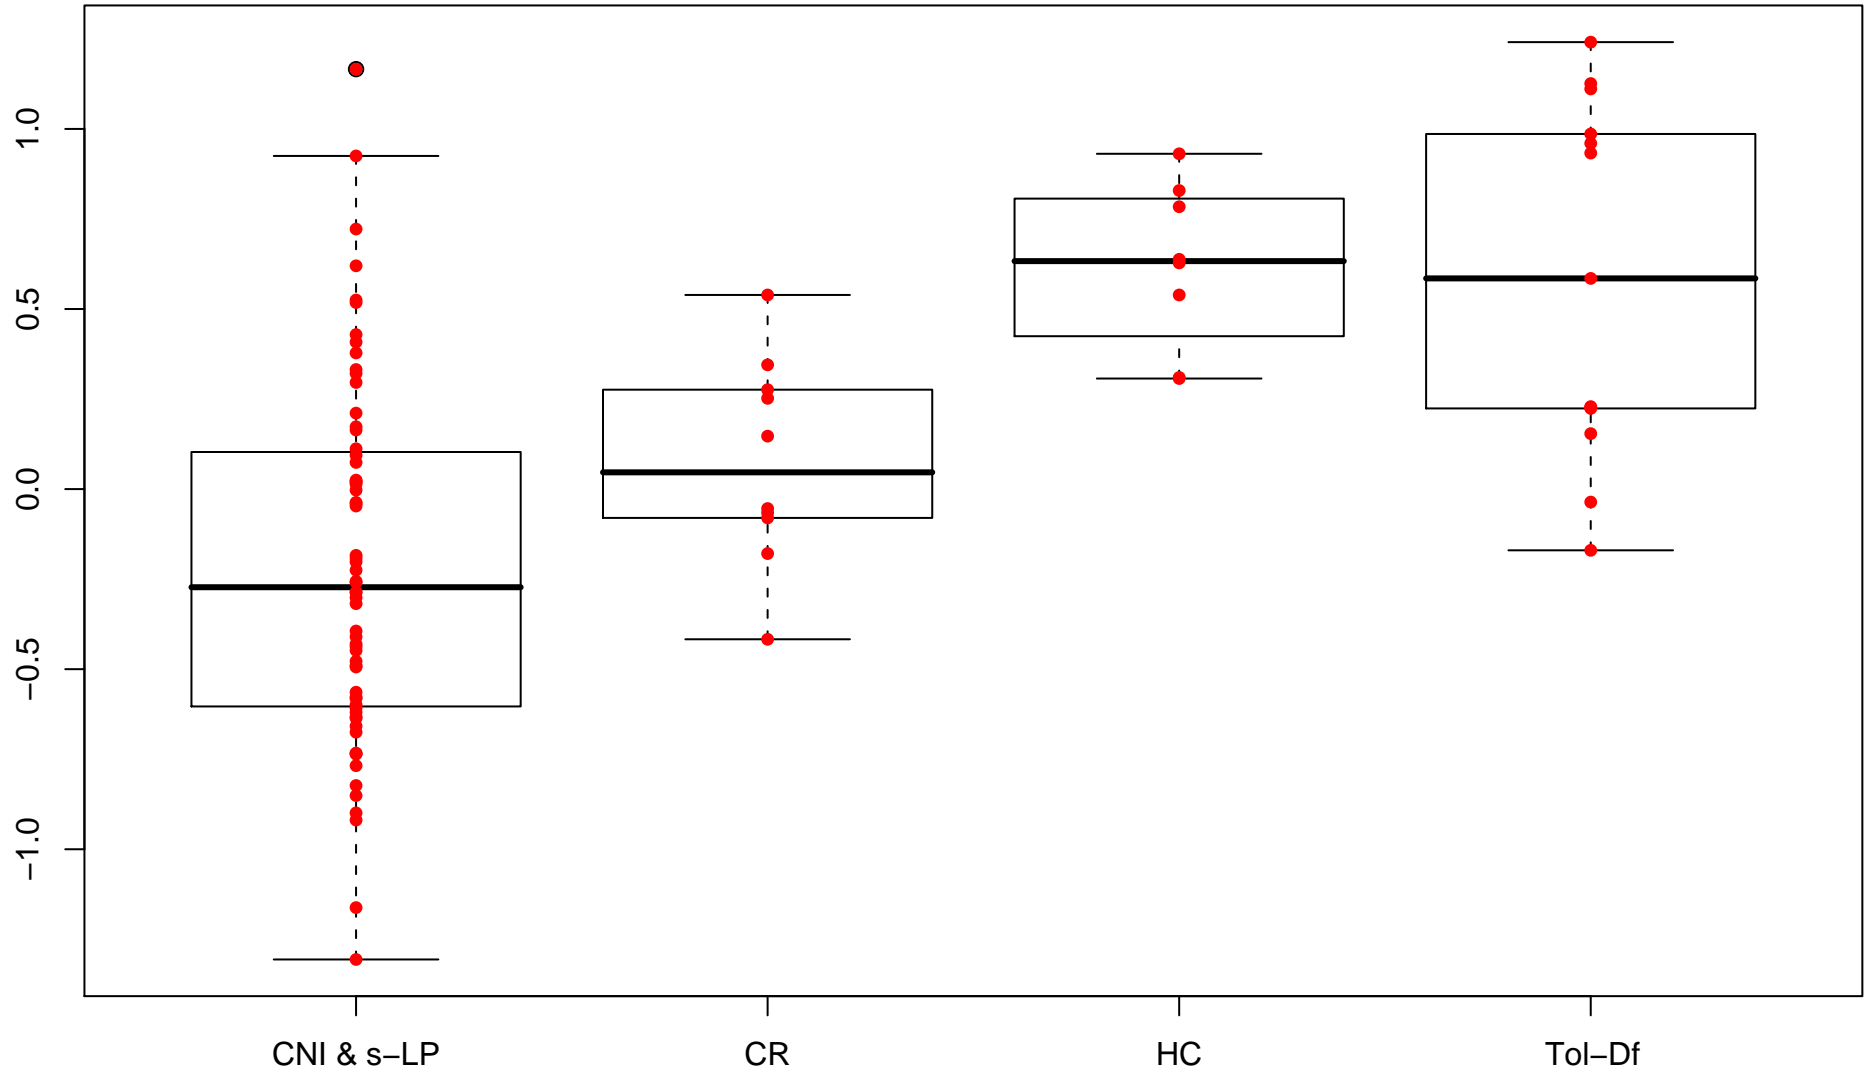

Rank 10 : SLC8A1  
7.242e-07

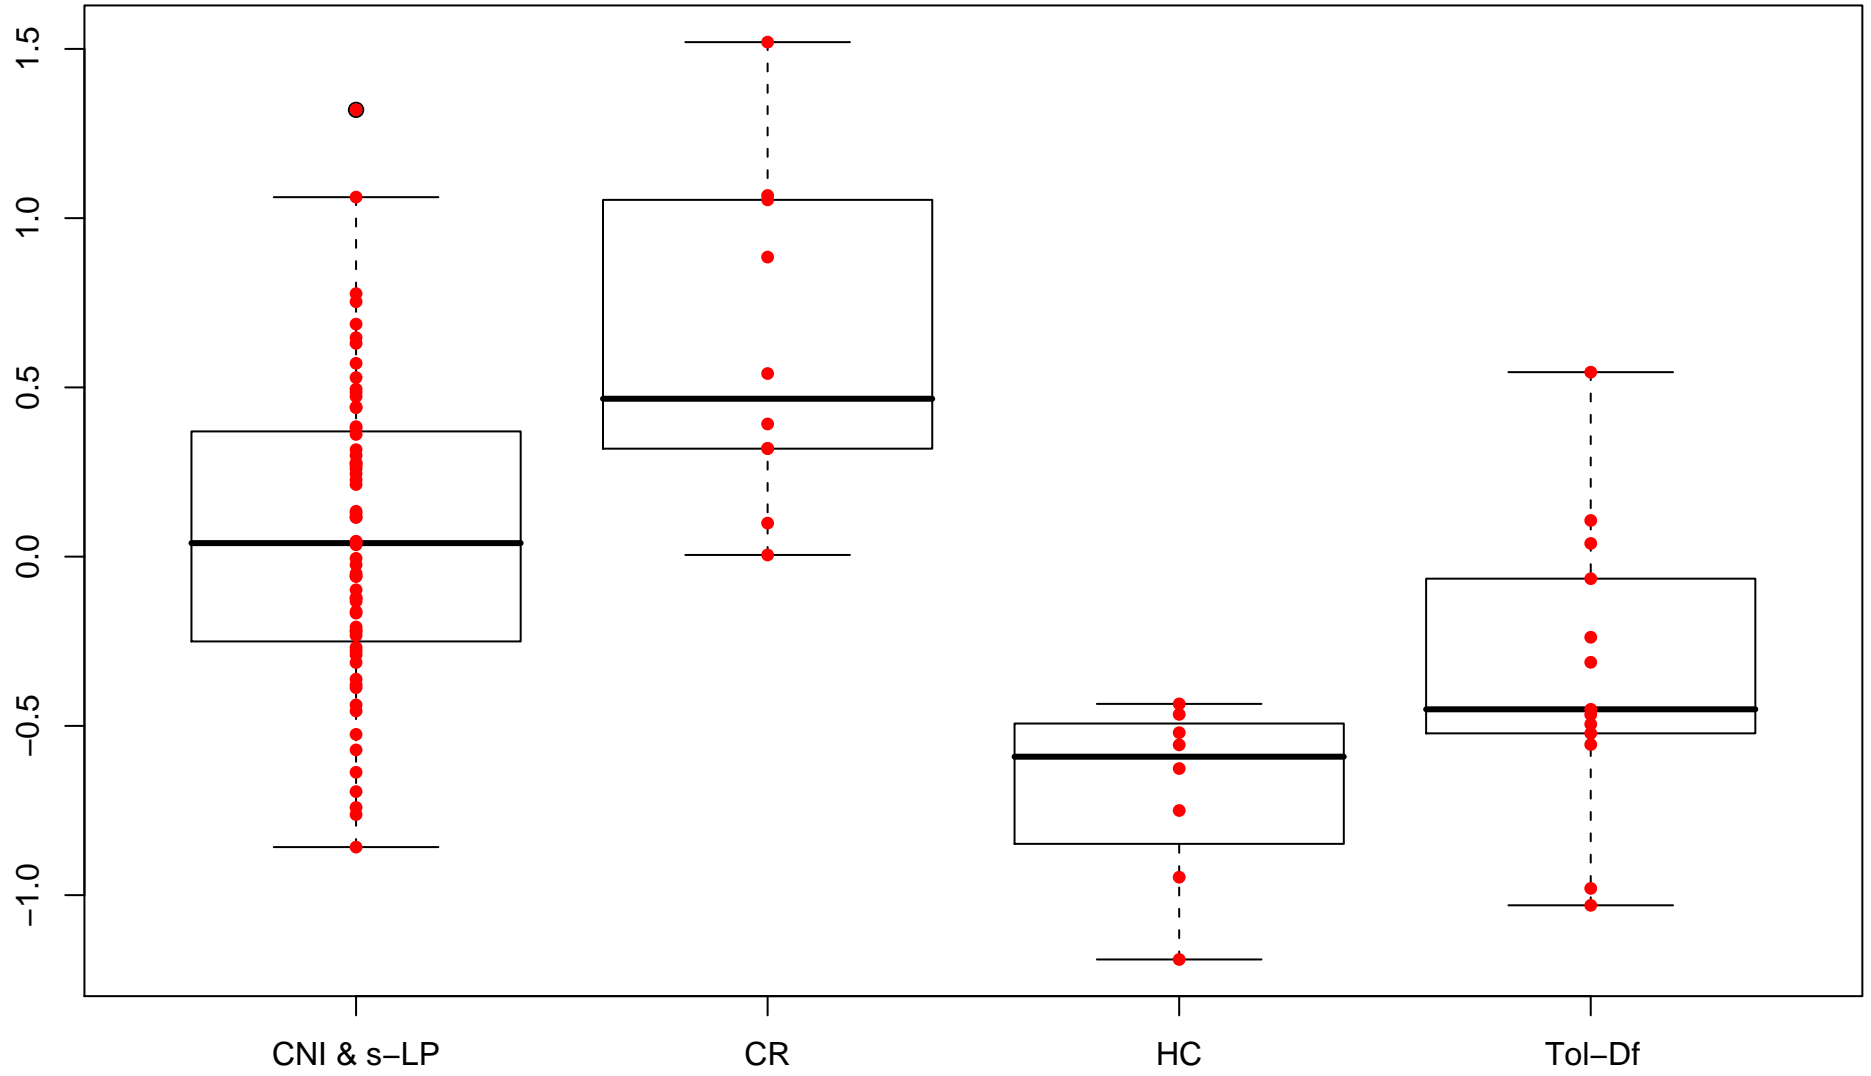



Rank 11 : FCRL2  
7.424e-07

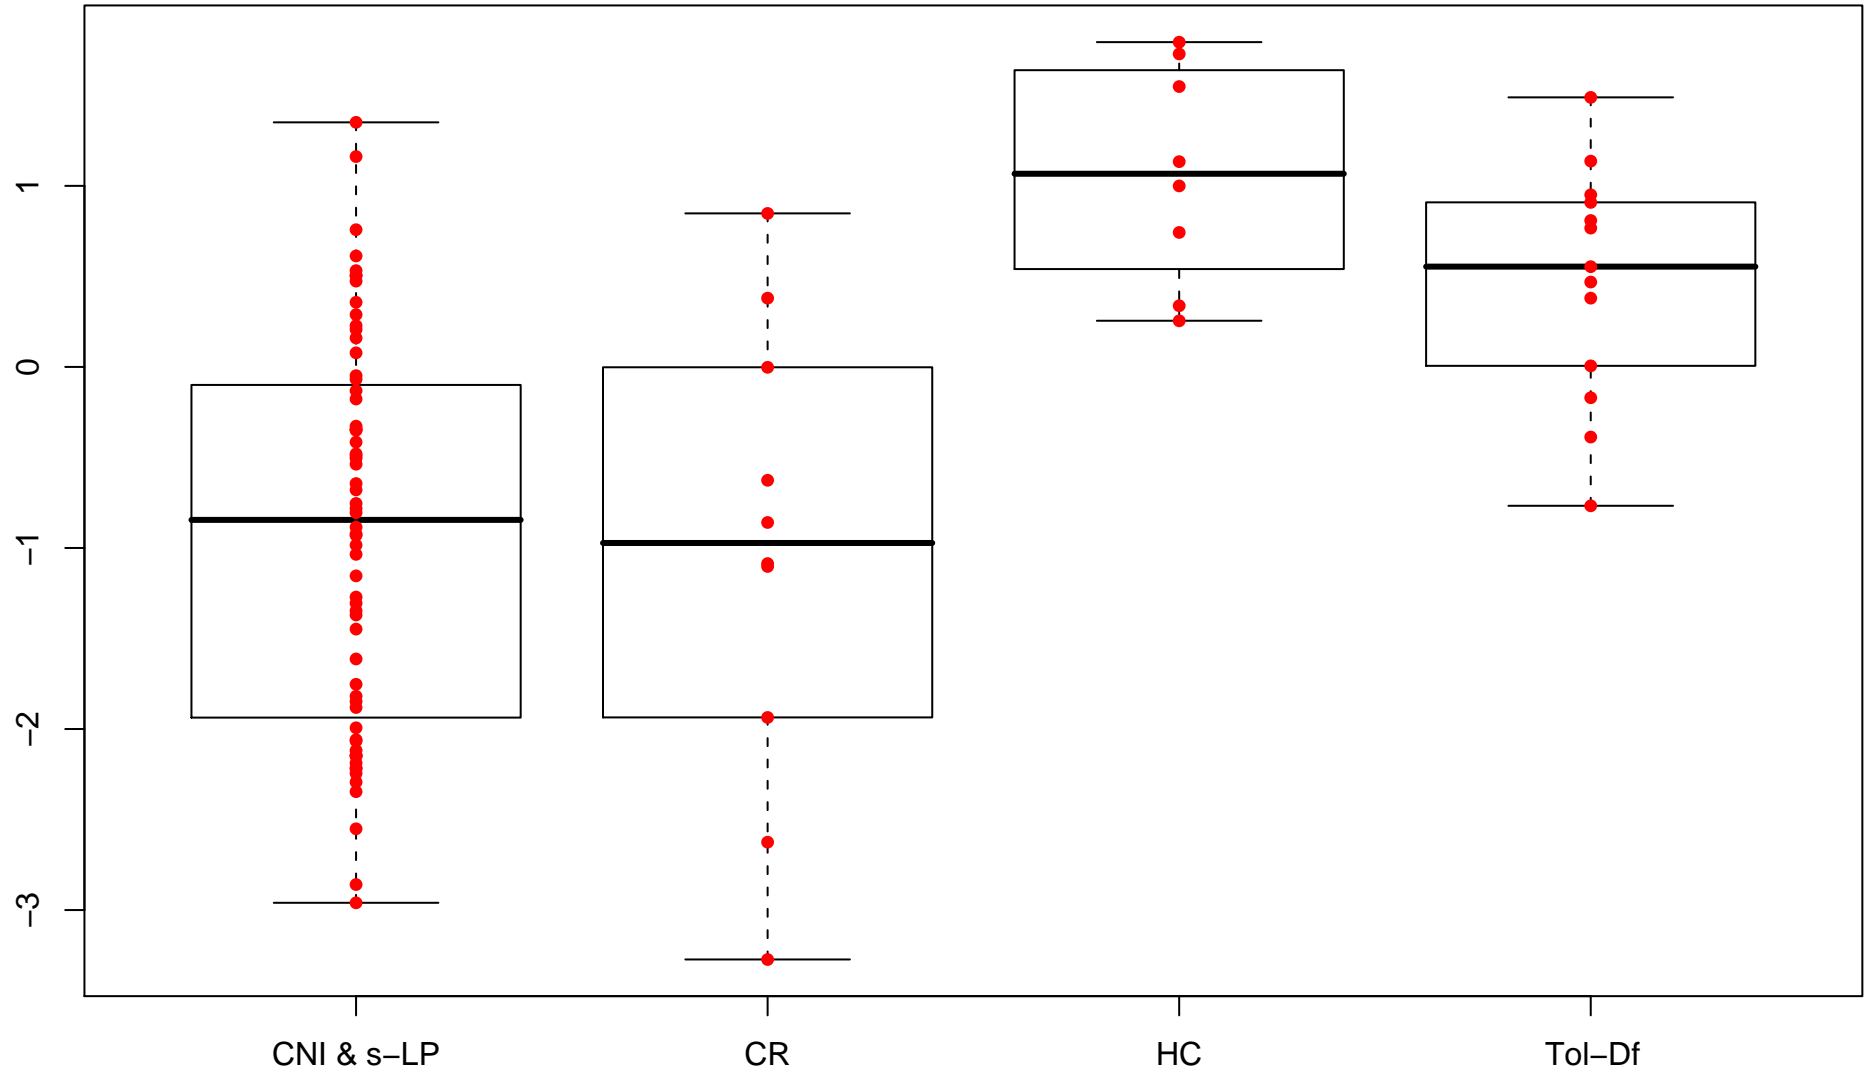

Rank 12 : BLK  
1.4605e-06

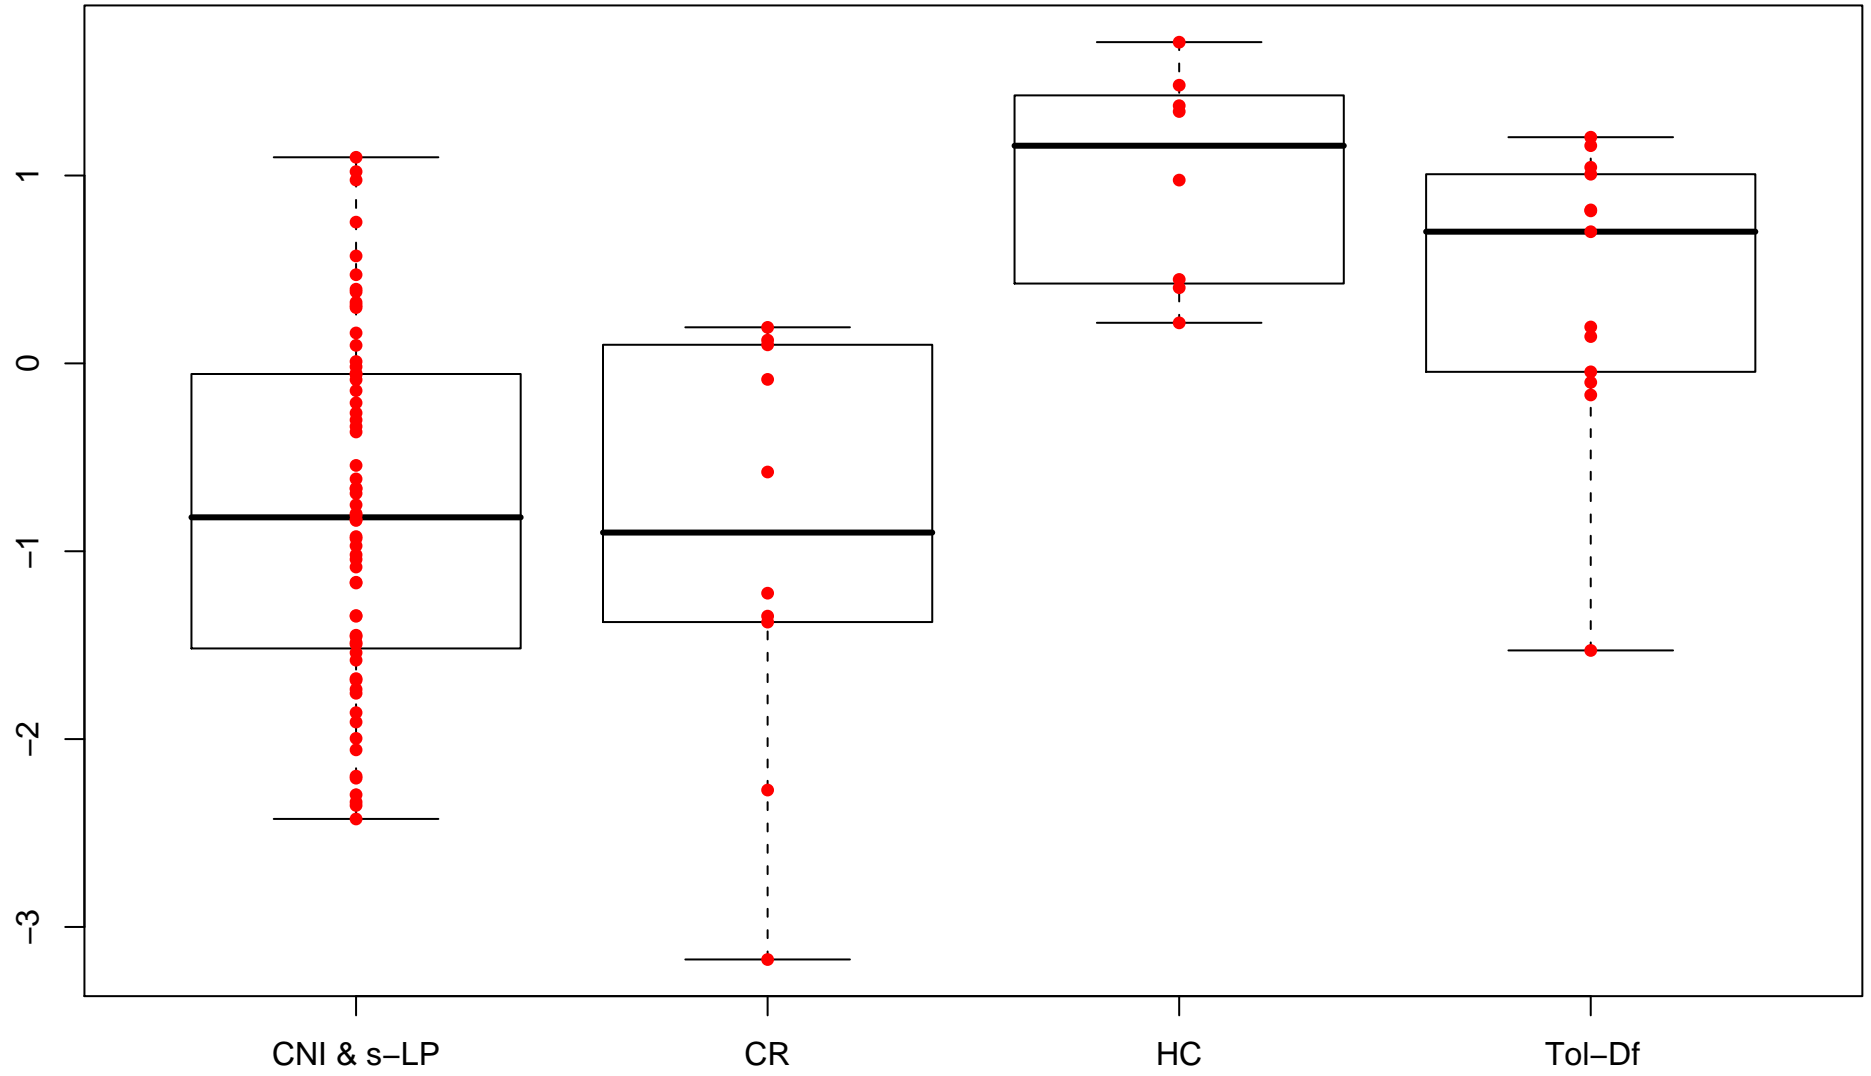

Rank 13 : PCDH9  
1.5219e-06

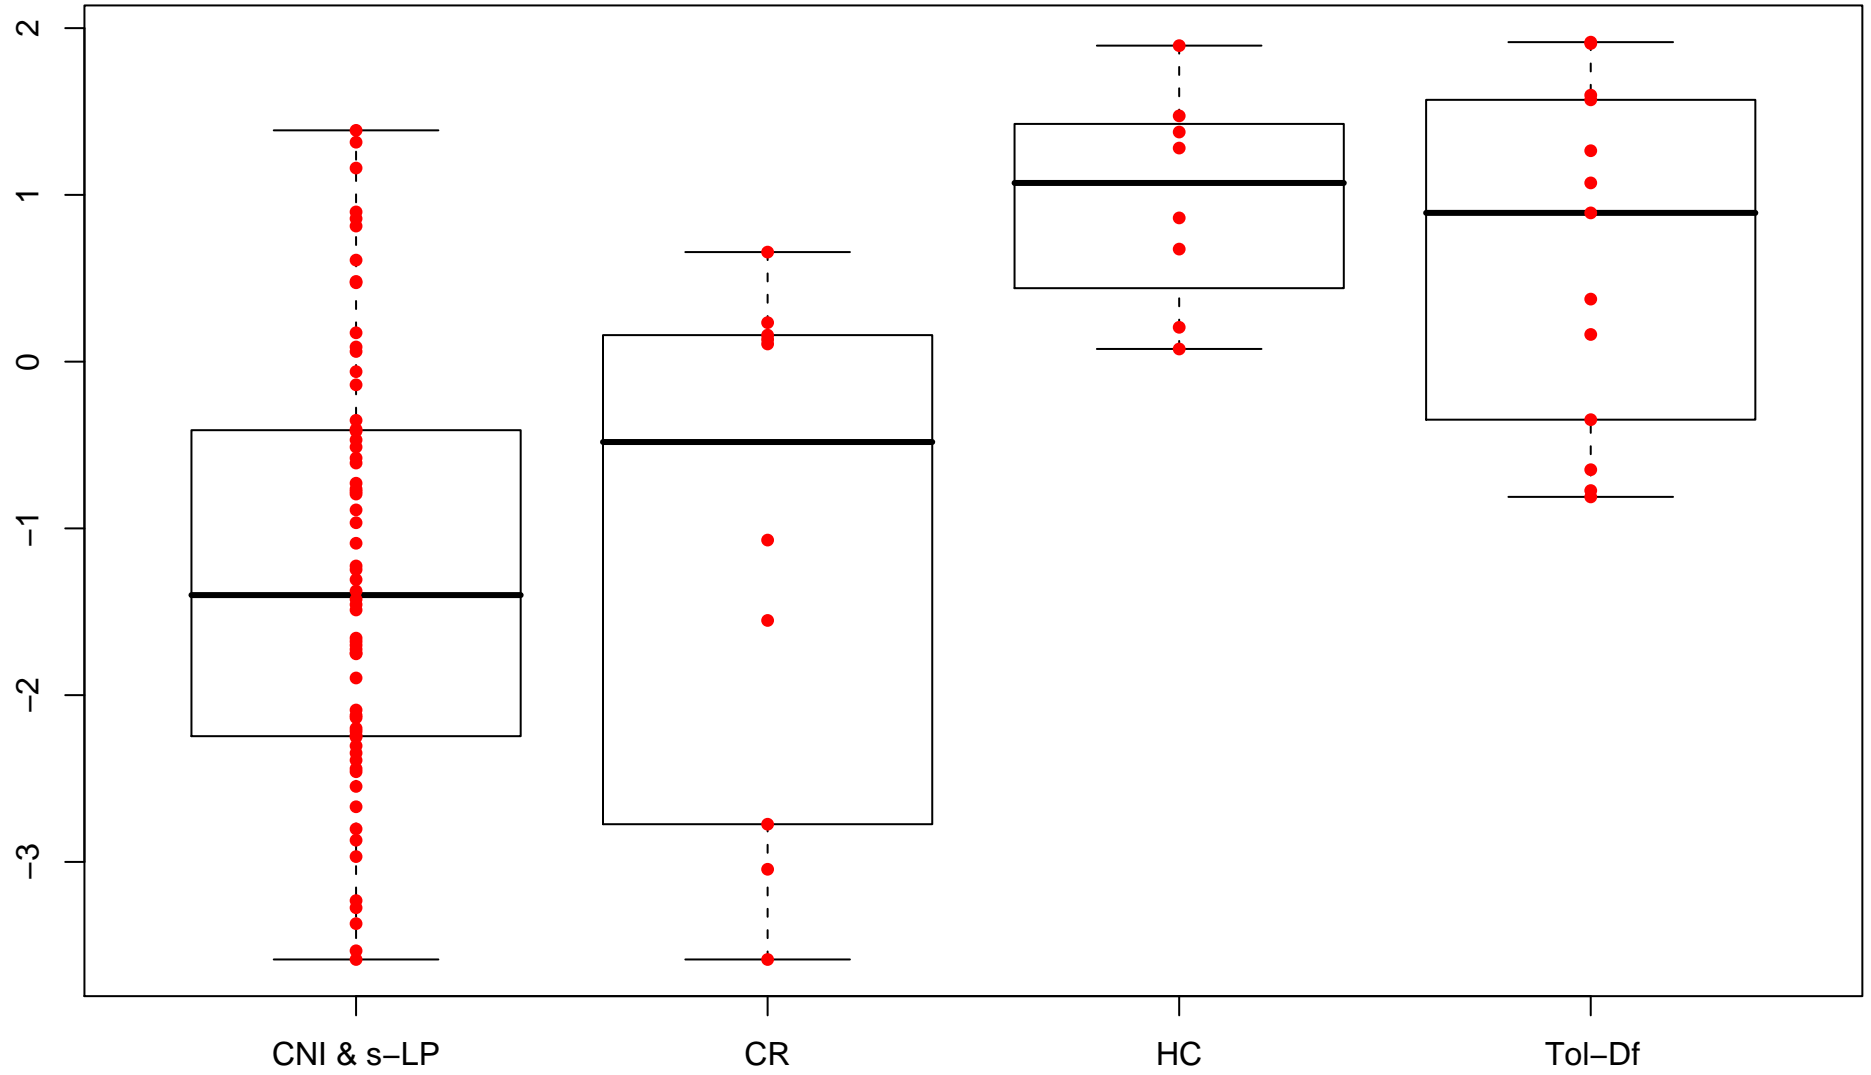

Rank 14 : CD200  
2.0047e-06

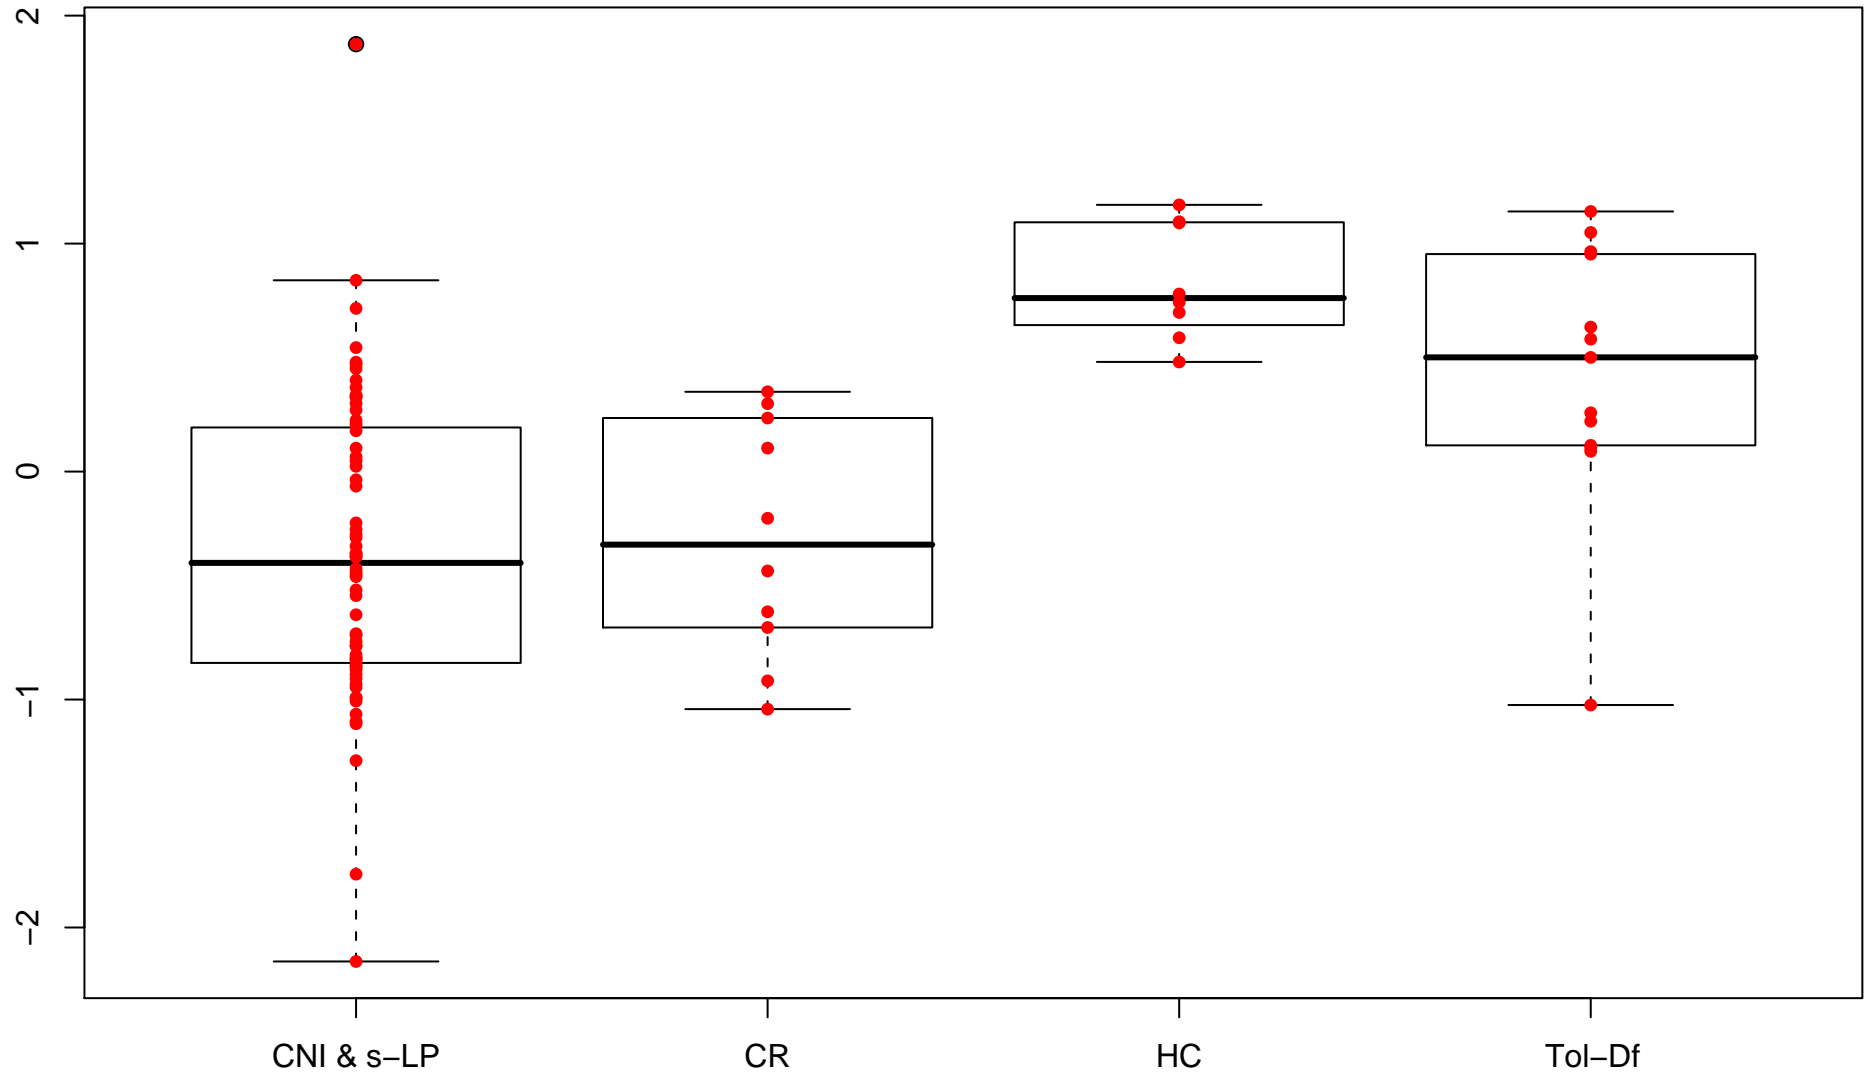

Rank 15 : THC2317432  
2.0735e-06

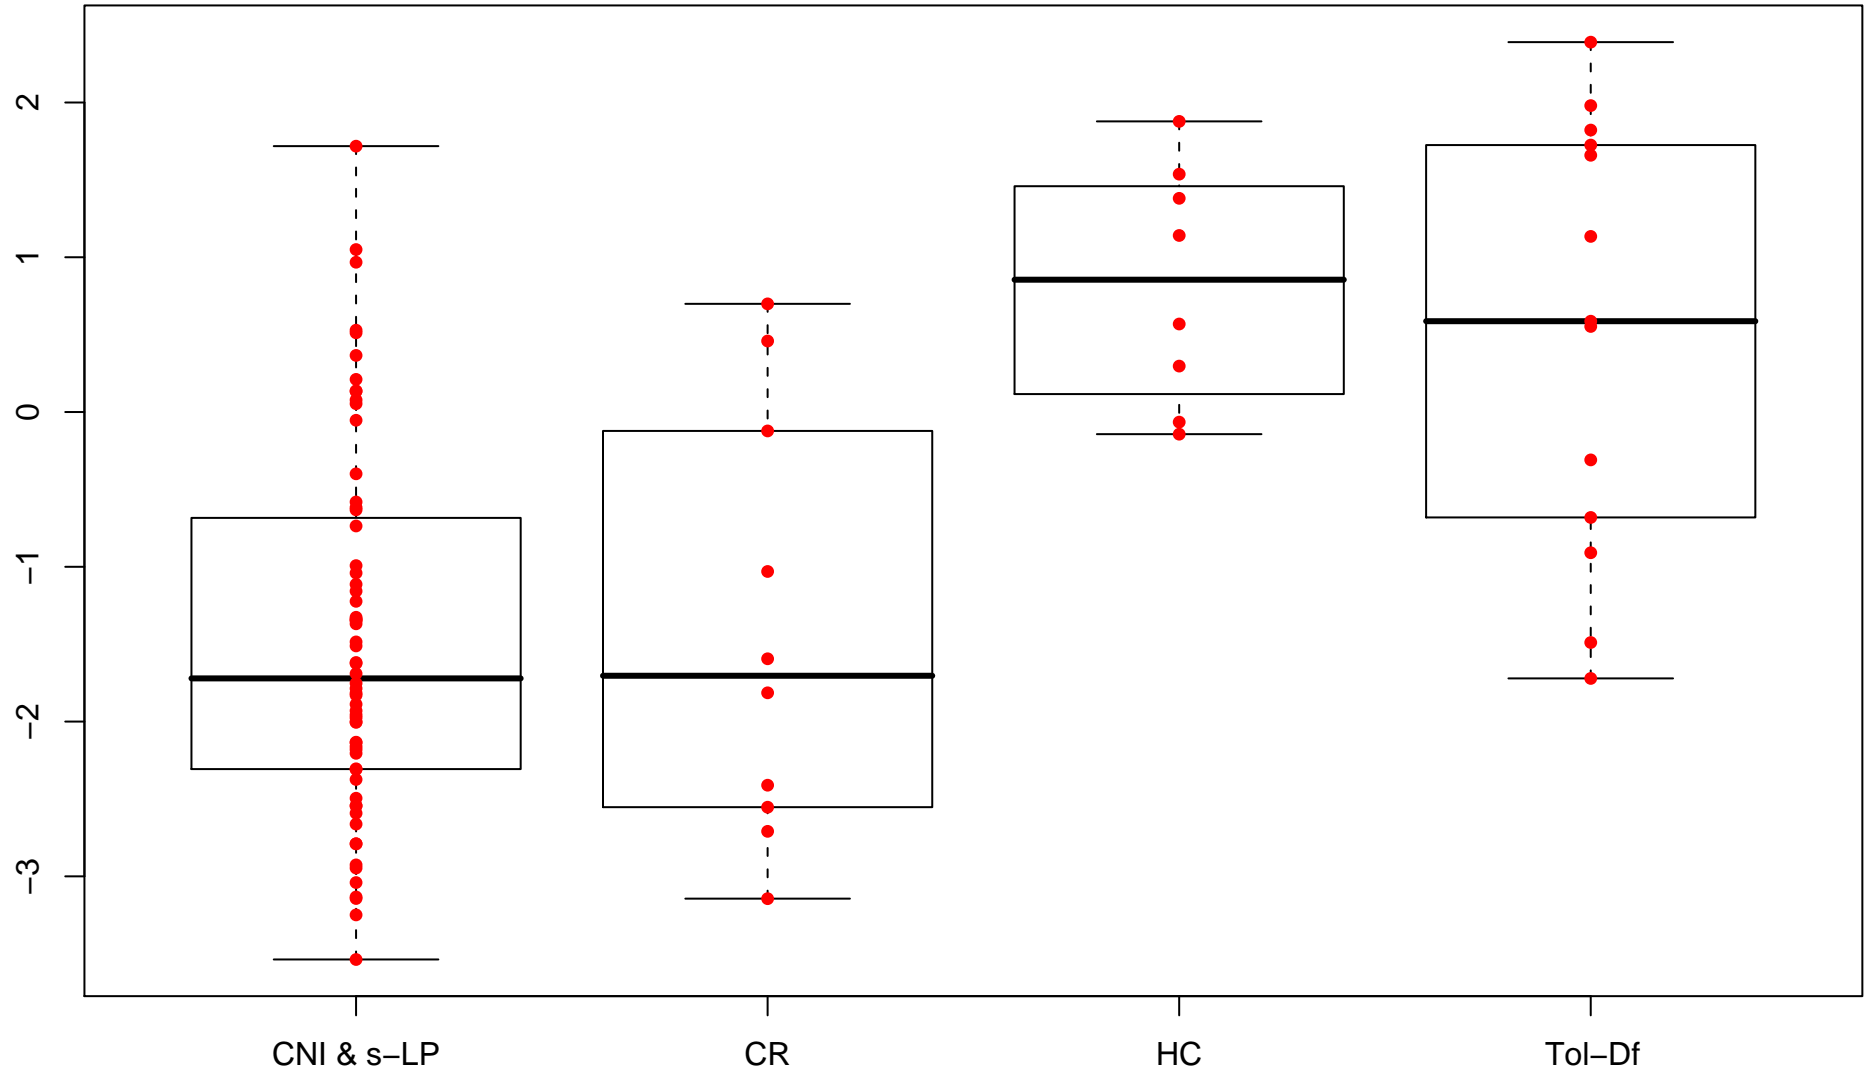

Rank 16 : BCL11A  
2.2103e-06

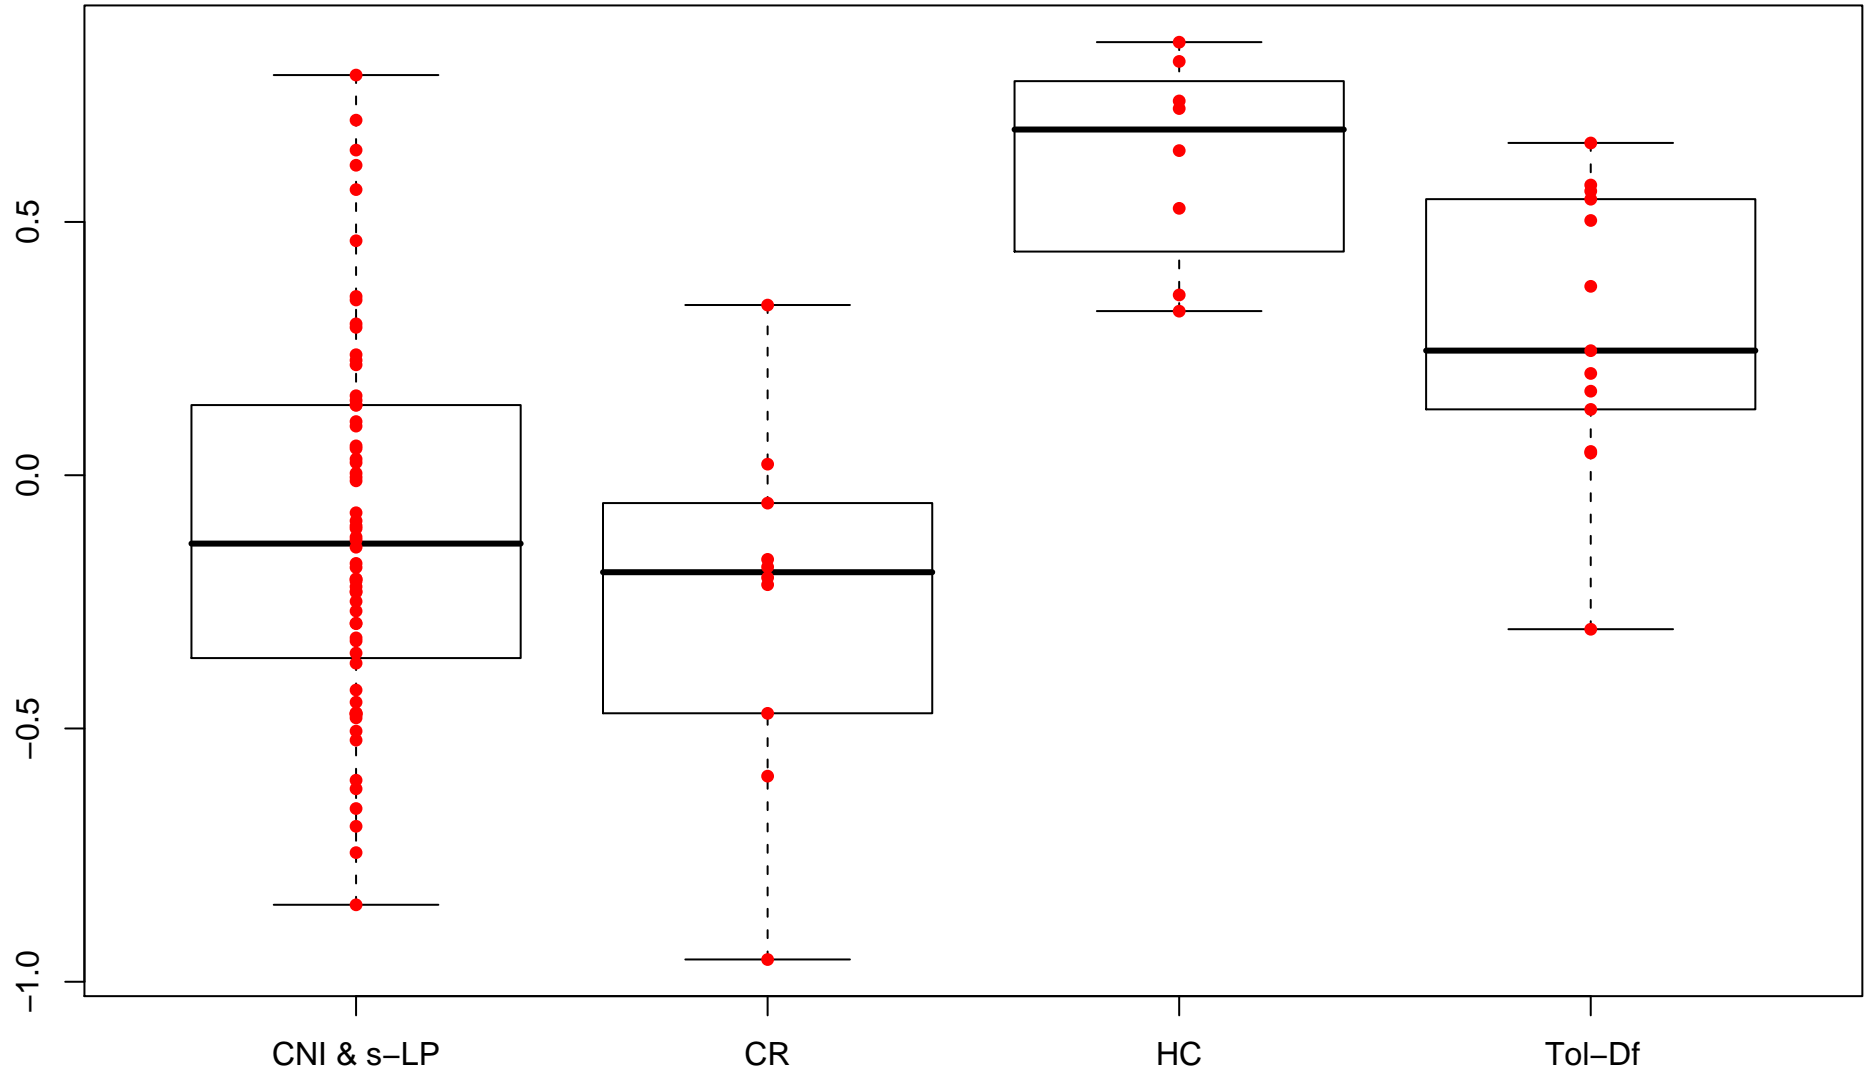

Rank 17 : TSPAN3  
3.248e-06

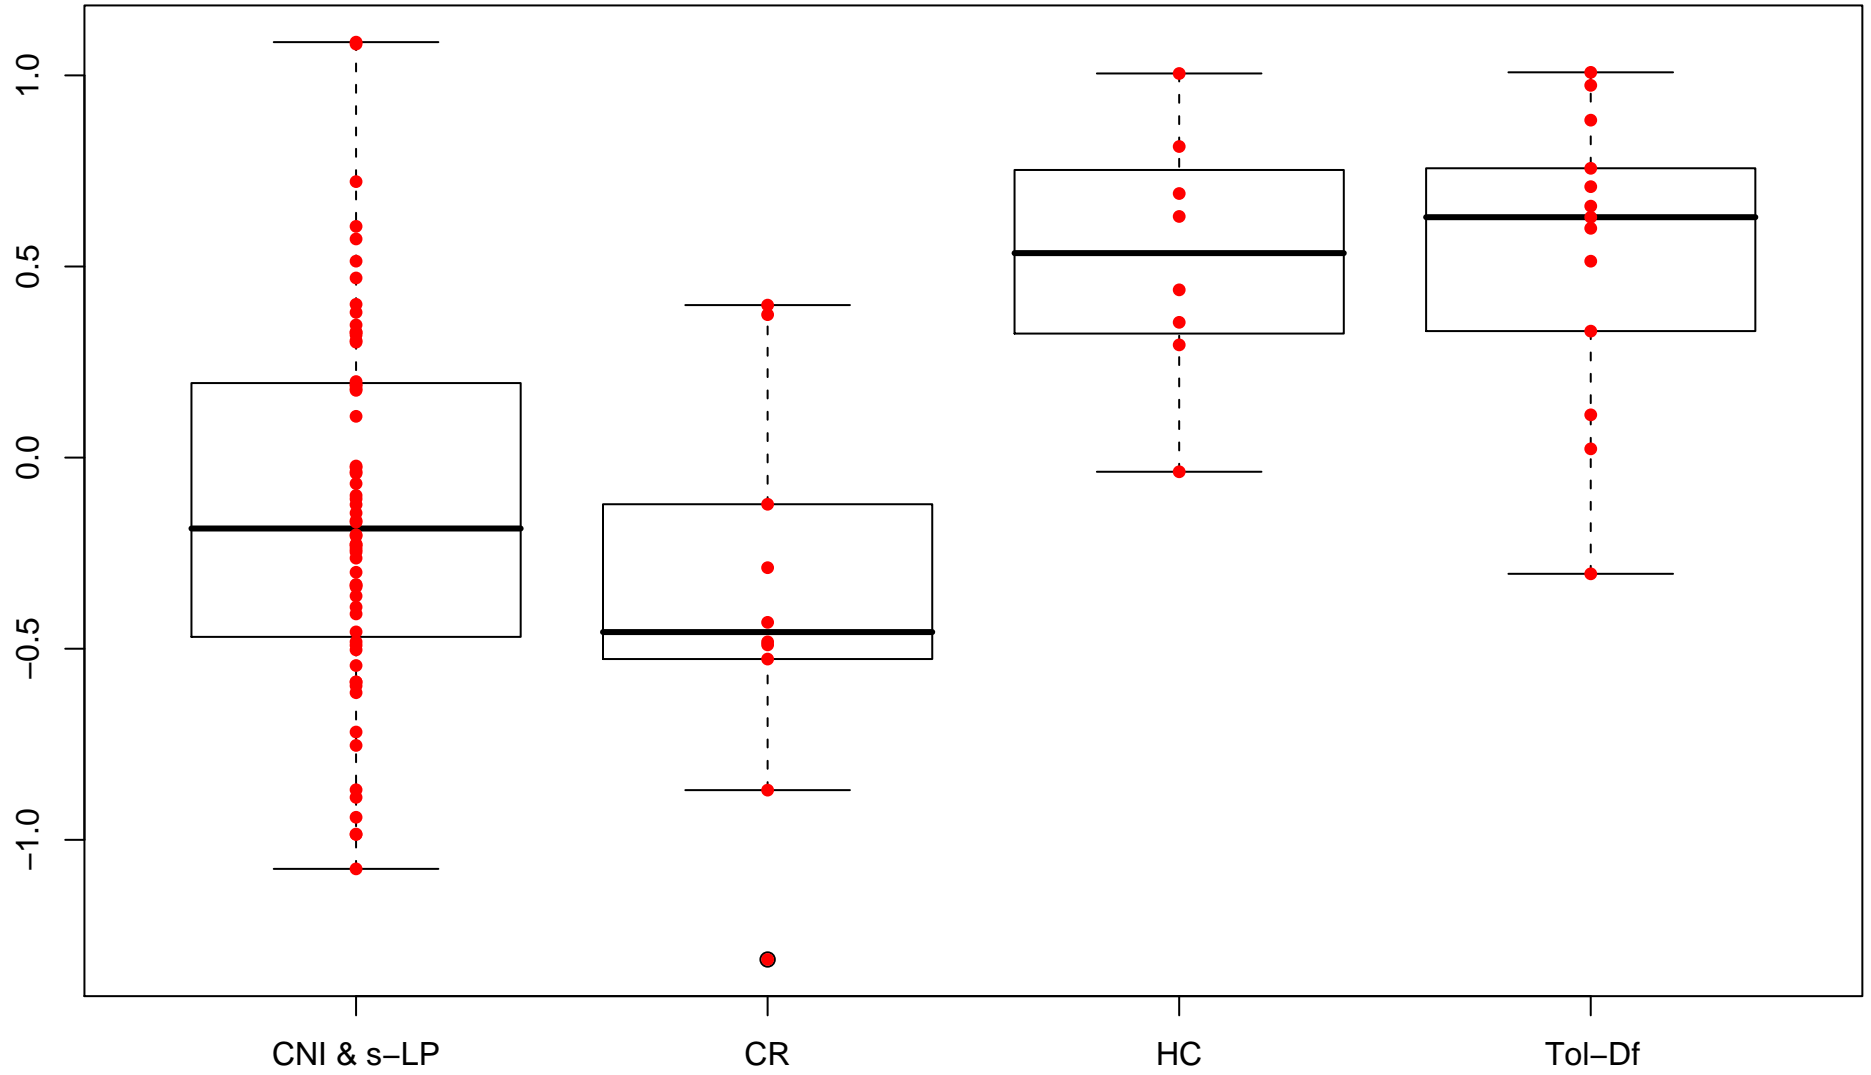

Rank 18 : CD79A  
3.961e-06

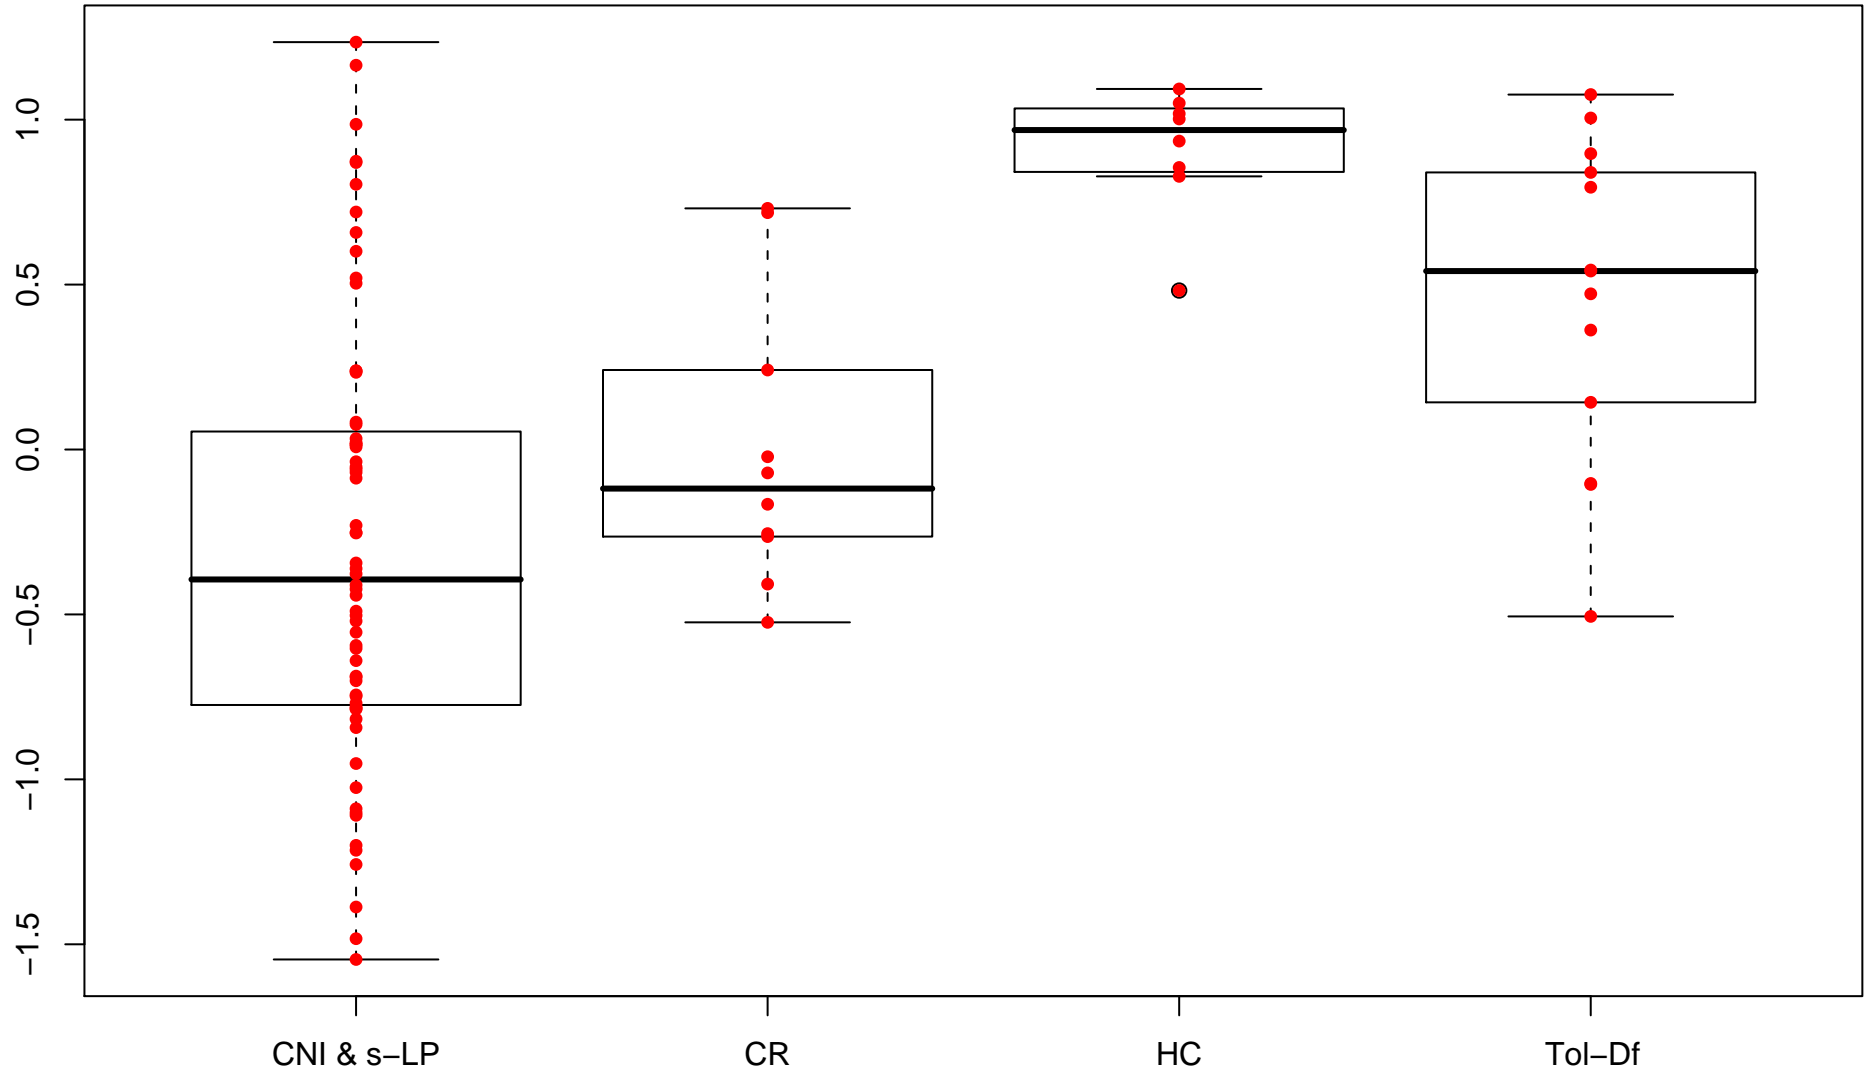



Rank 19 : CASP5  
4.113e-06

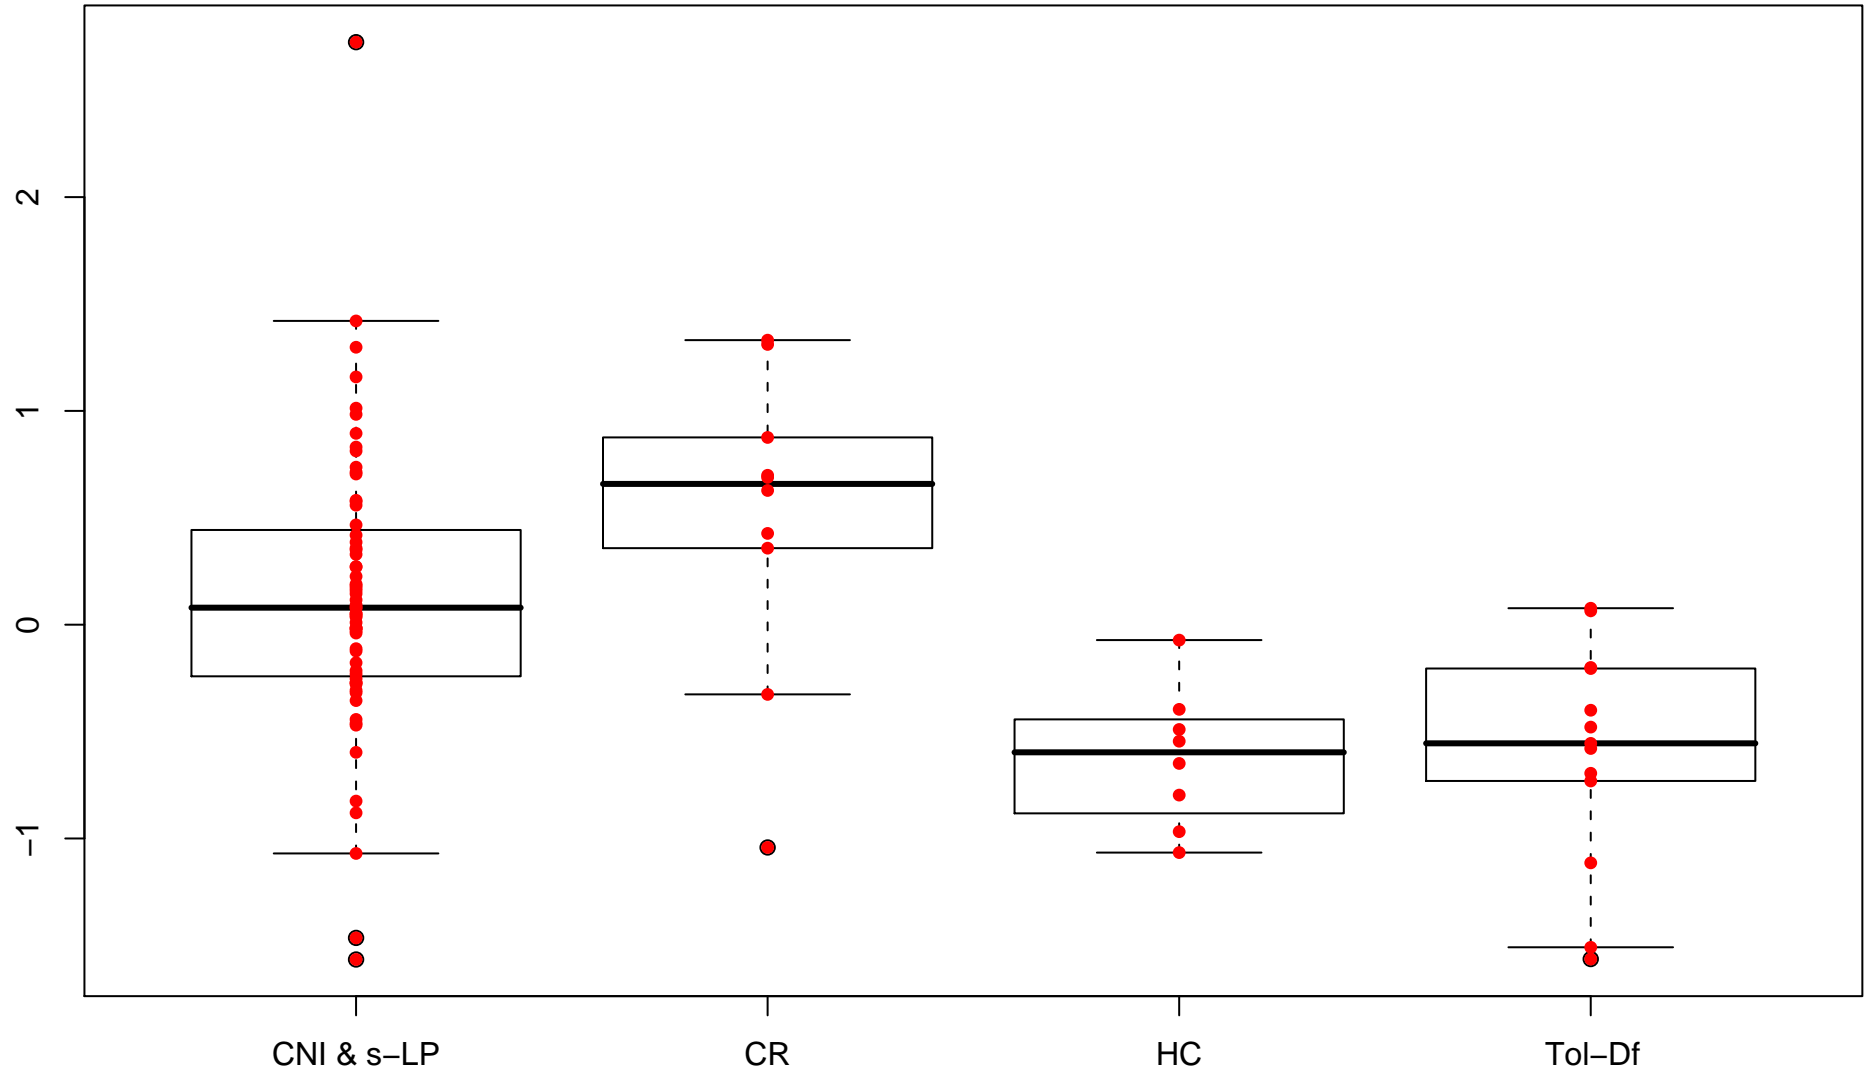

Rank 20 : FCRL5  
4.518e-06

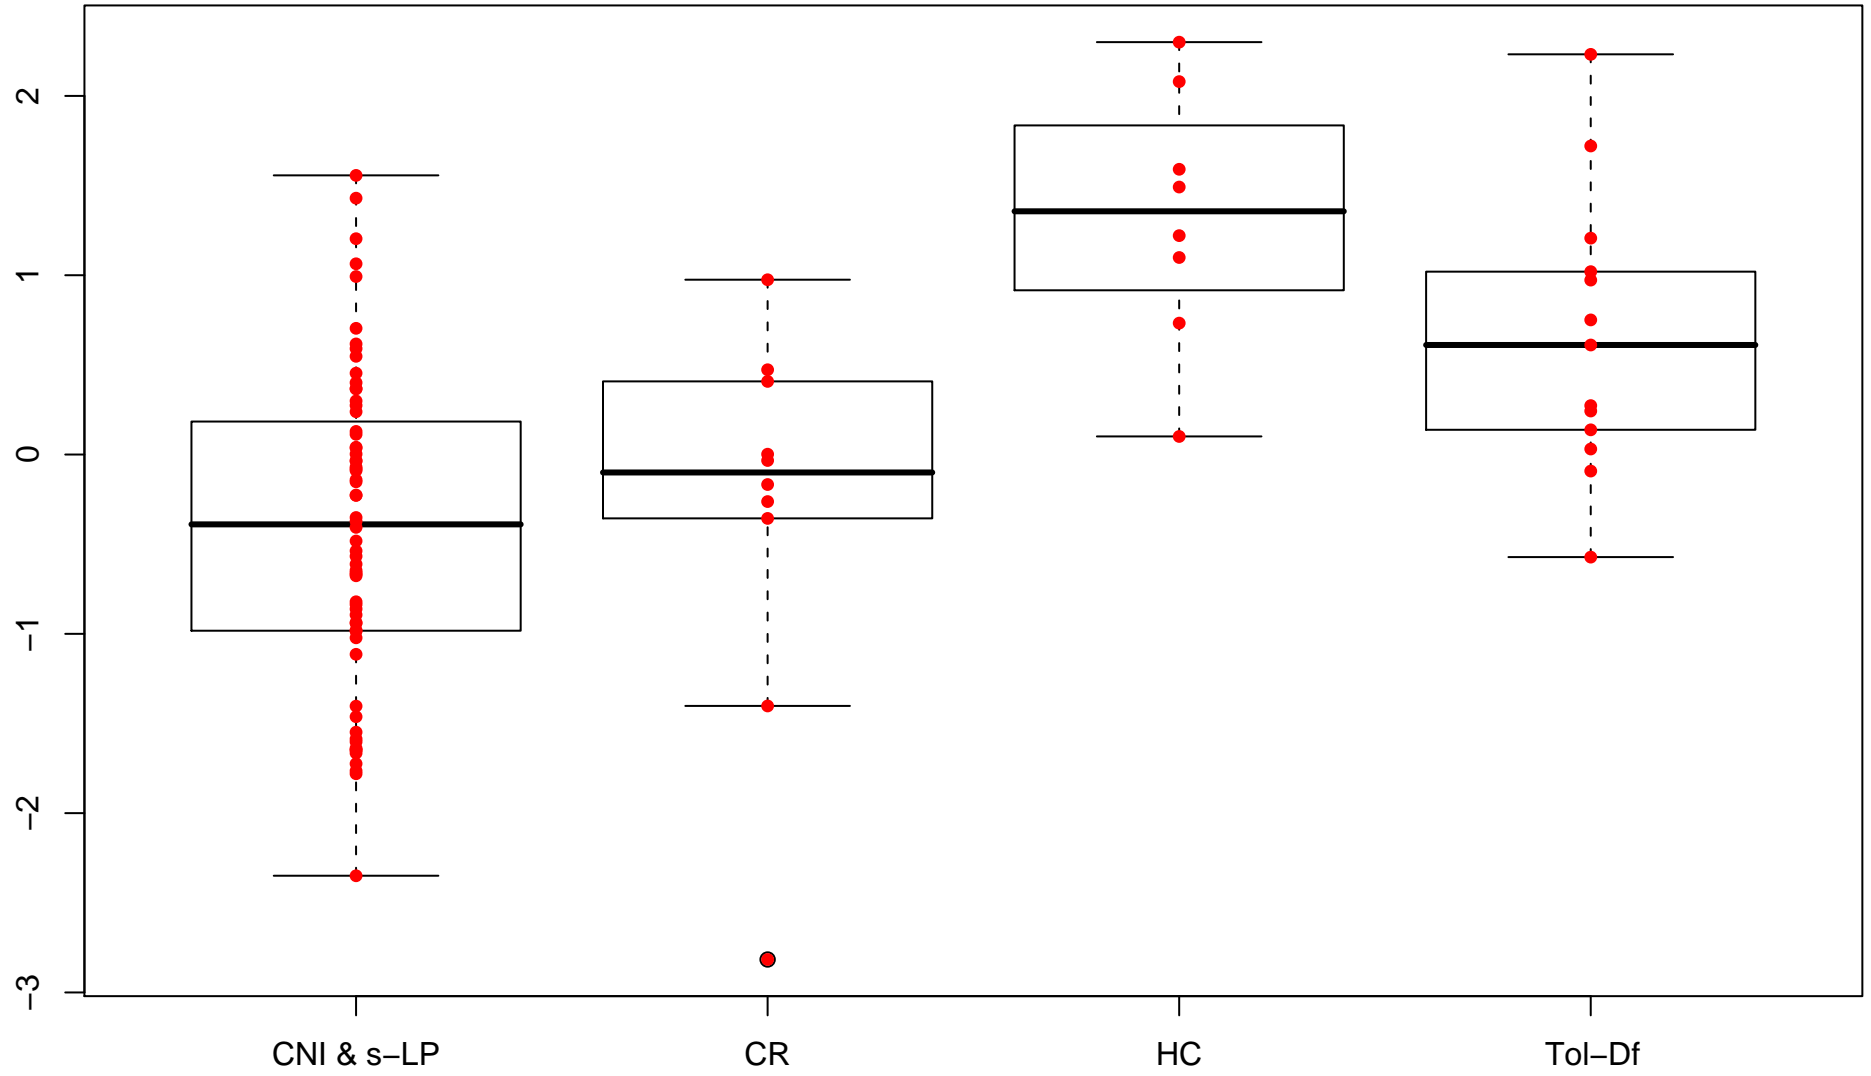

Rank 21 : IL1RL2  
5.652e-06

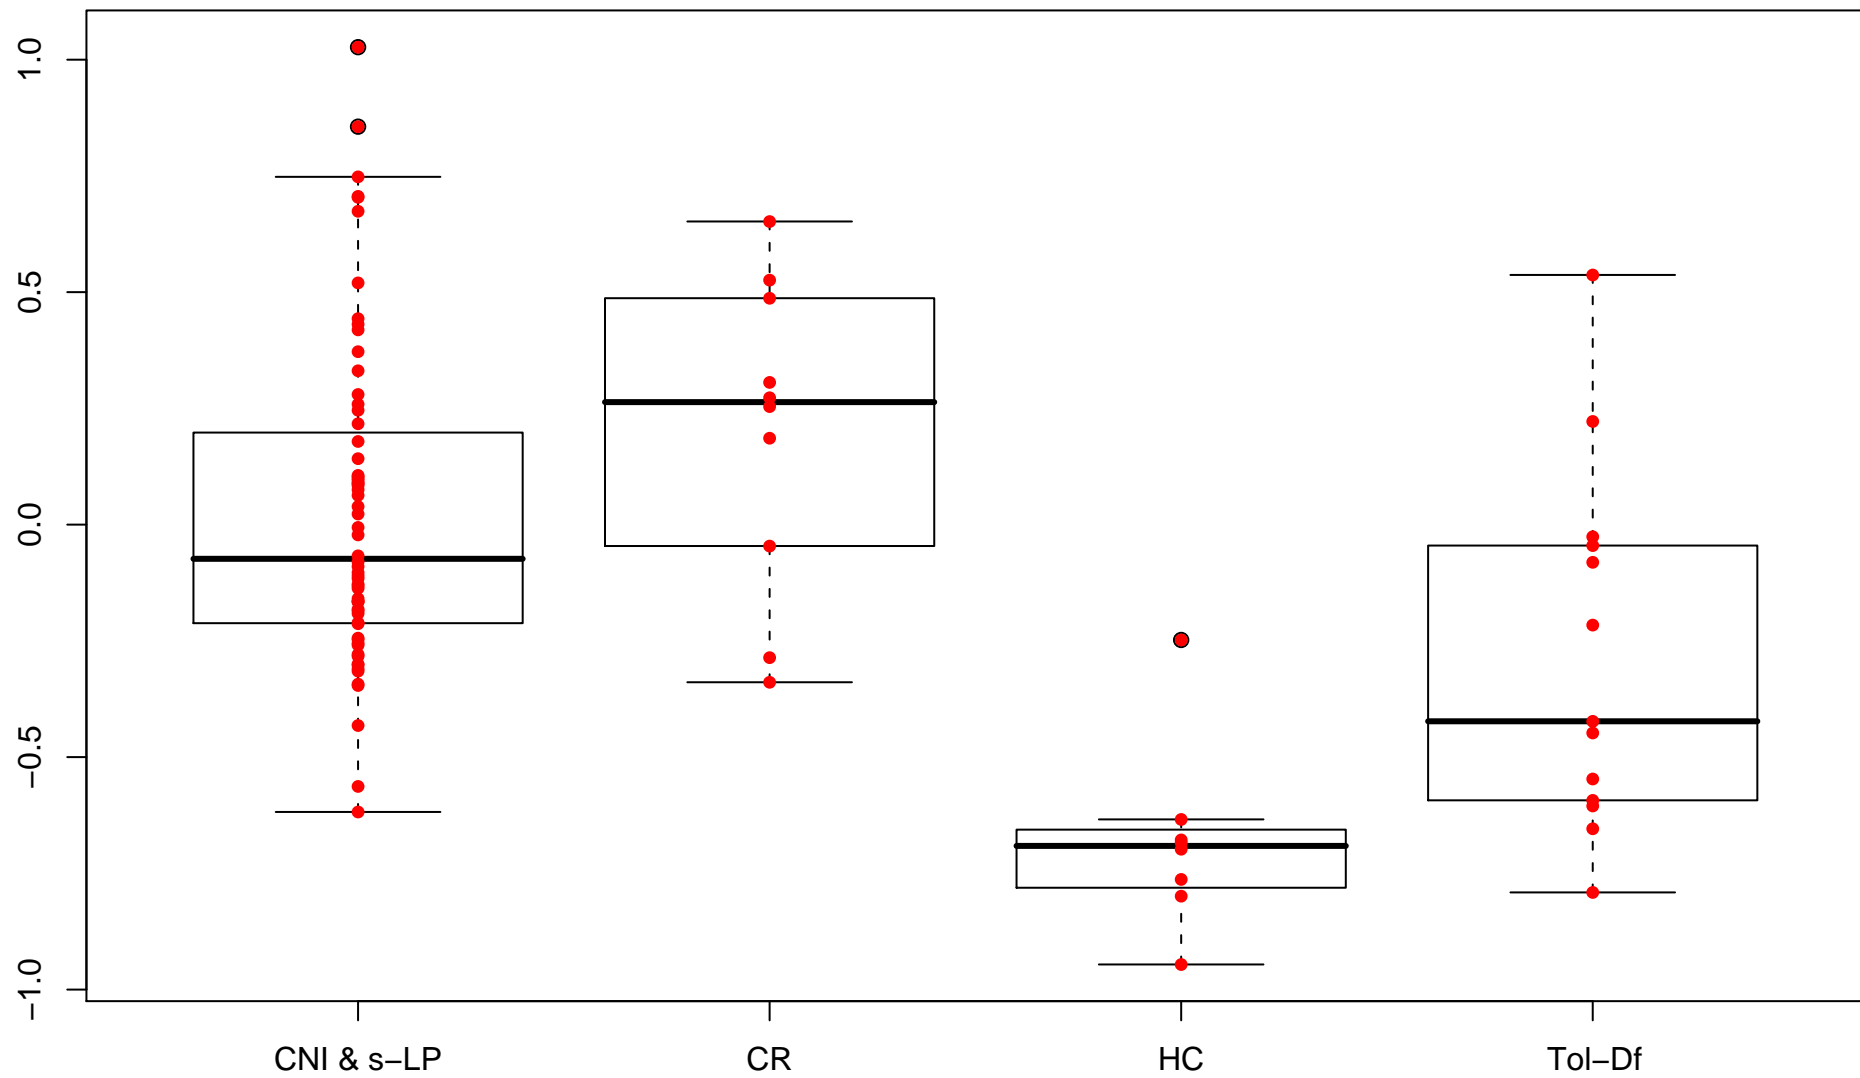

Rank 22 : EBI2  
6.636e-06

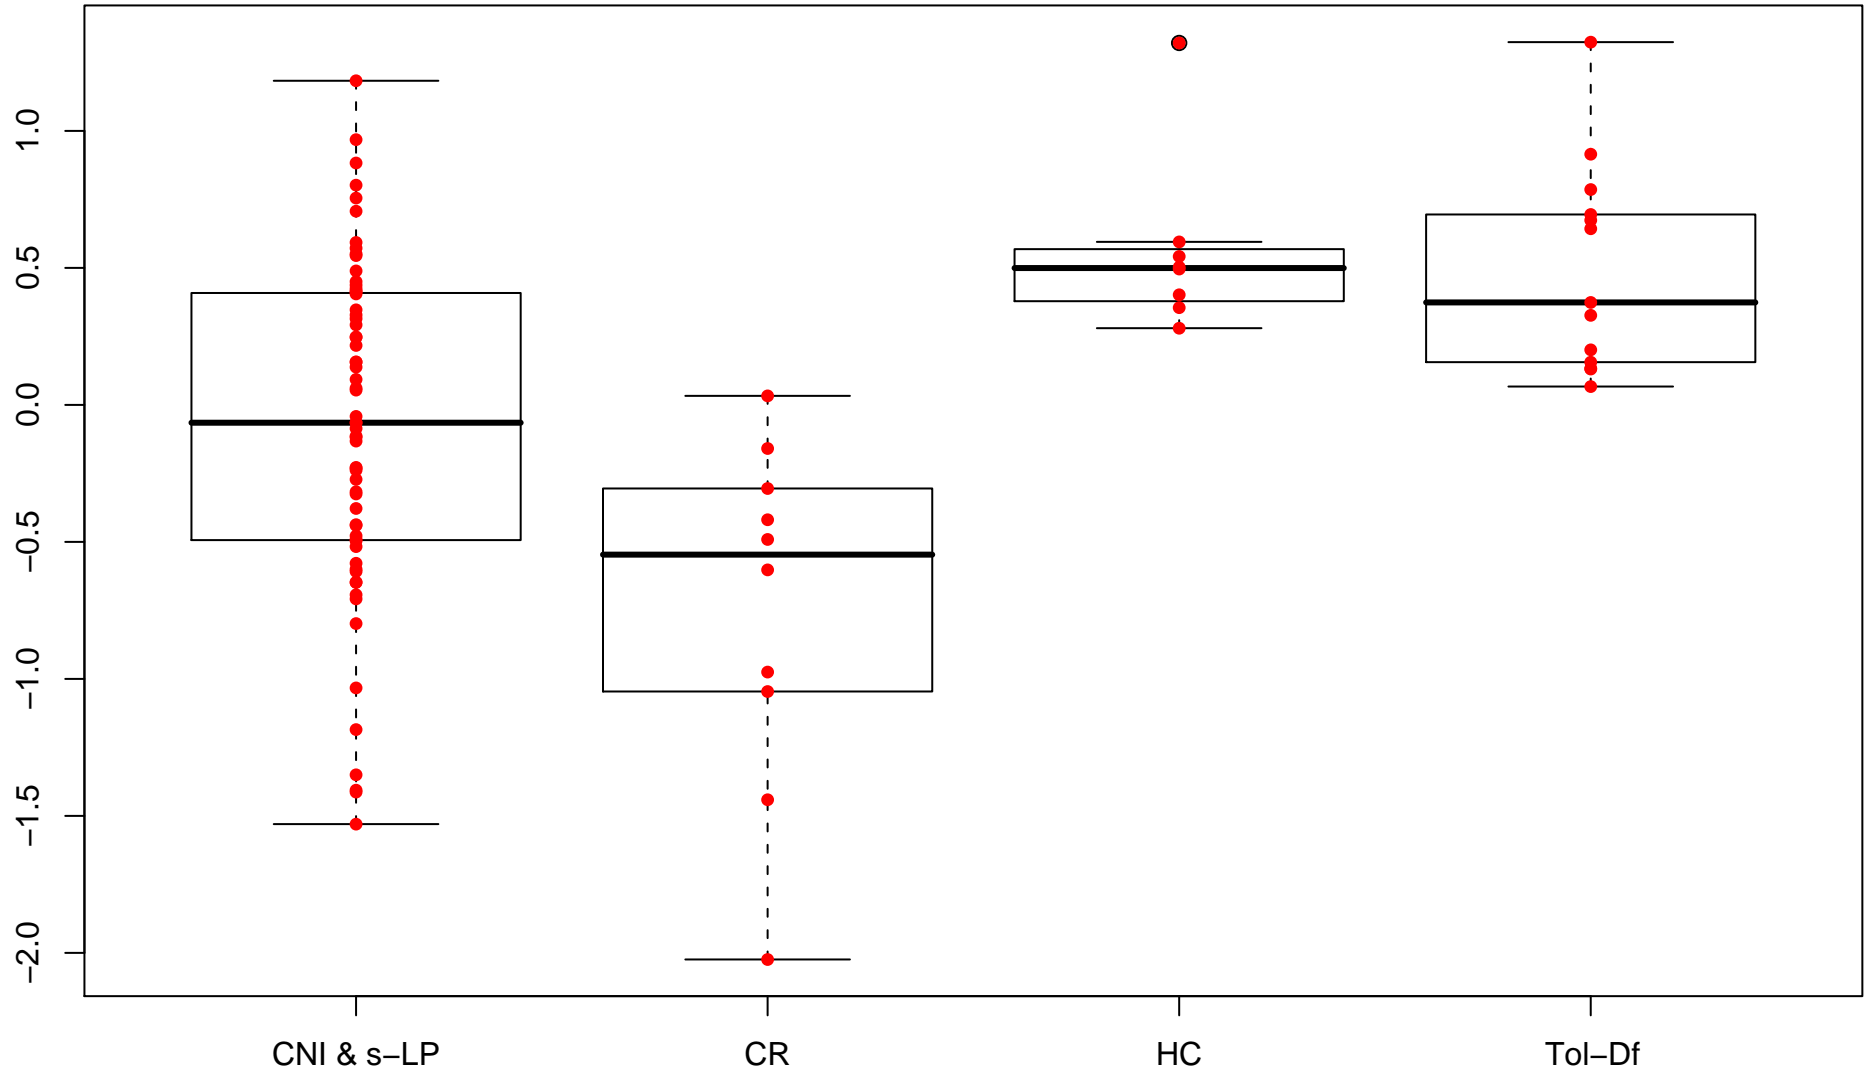

Rank 23 : BLNK  
6.711e-06

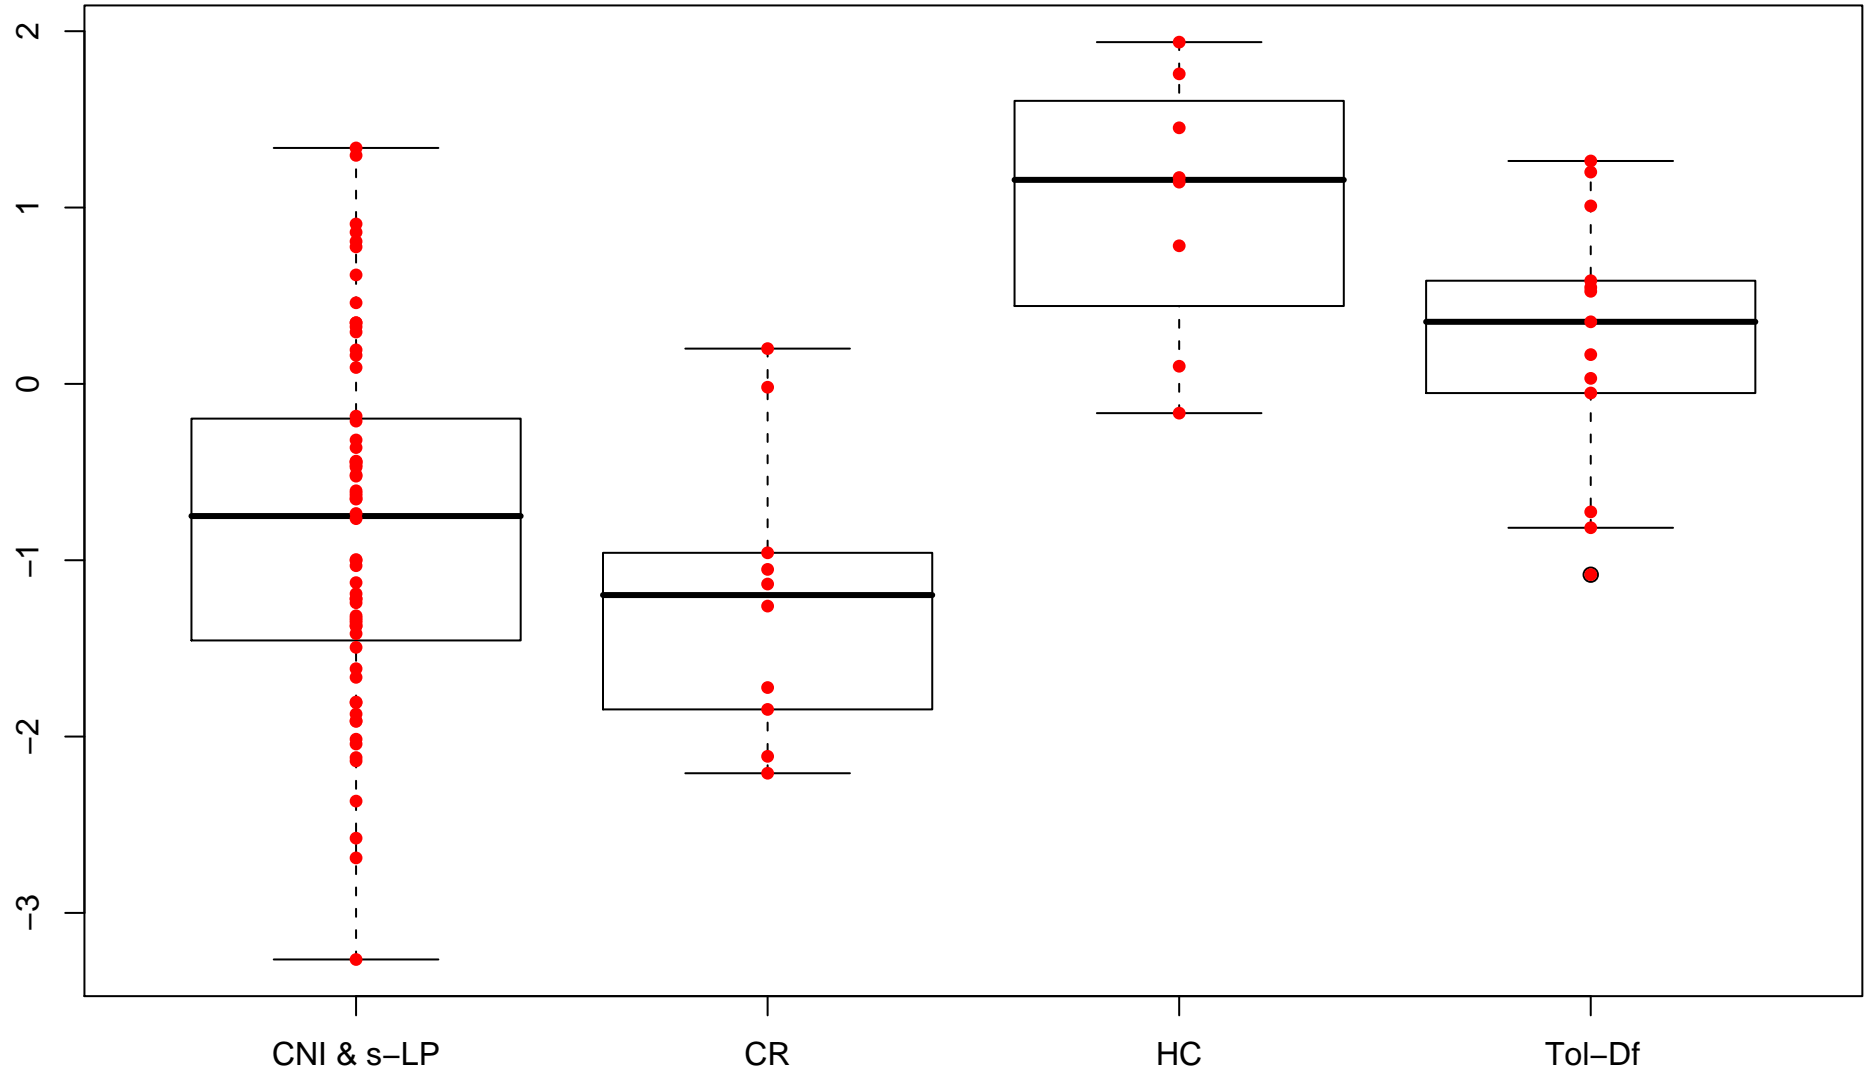

Rank 24 : THC2340114  
7.154e-06

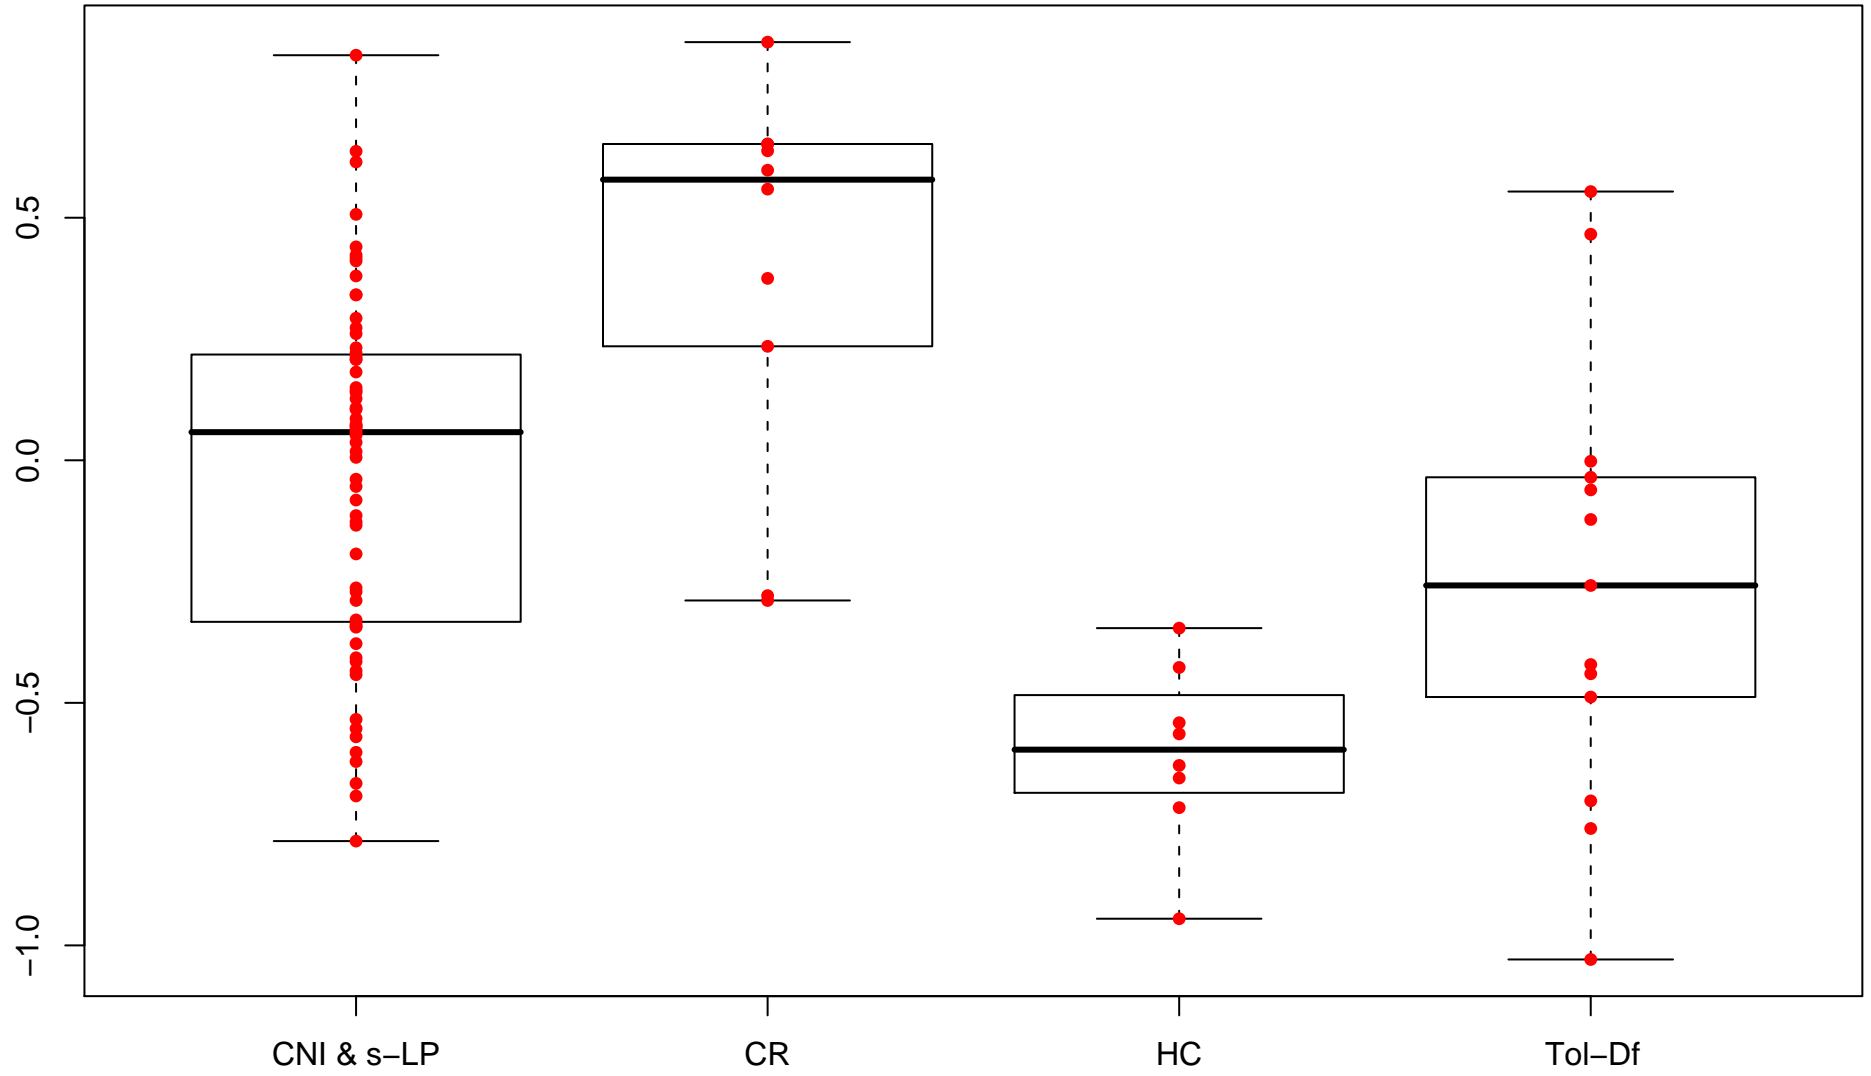

Rank 25 : RNF24  
7.217e-06

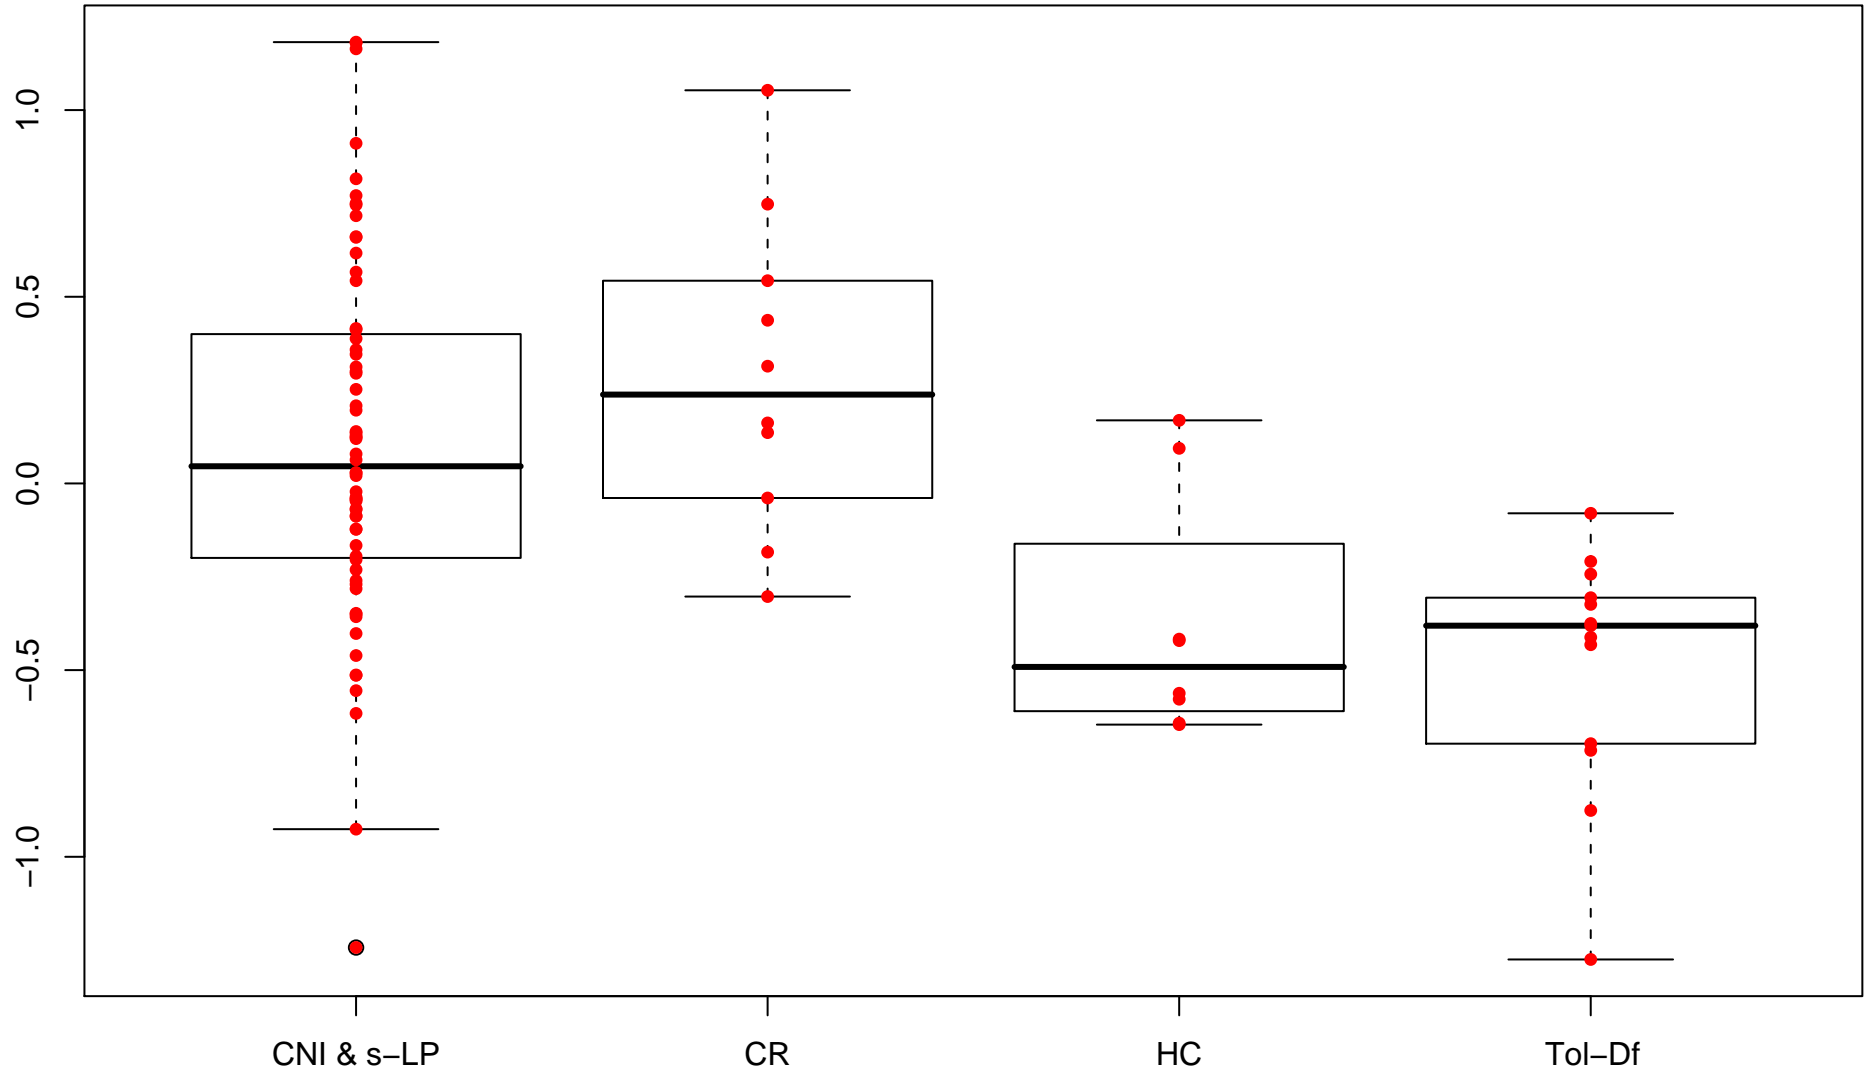

Rank 26 : DIMT1L  
7.548e-06

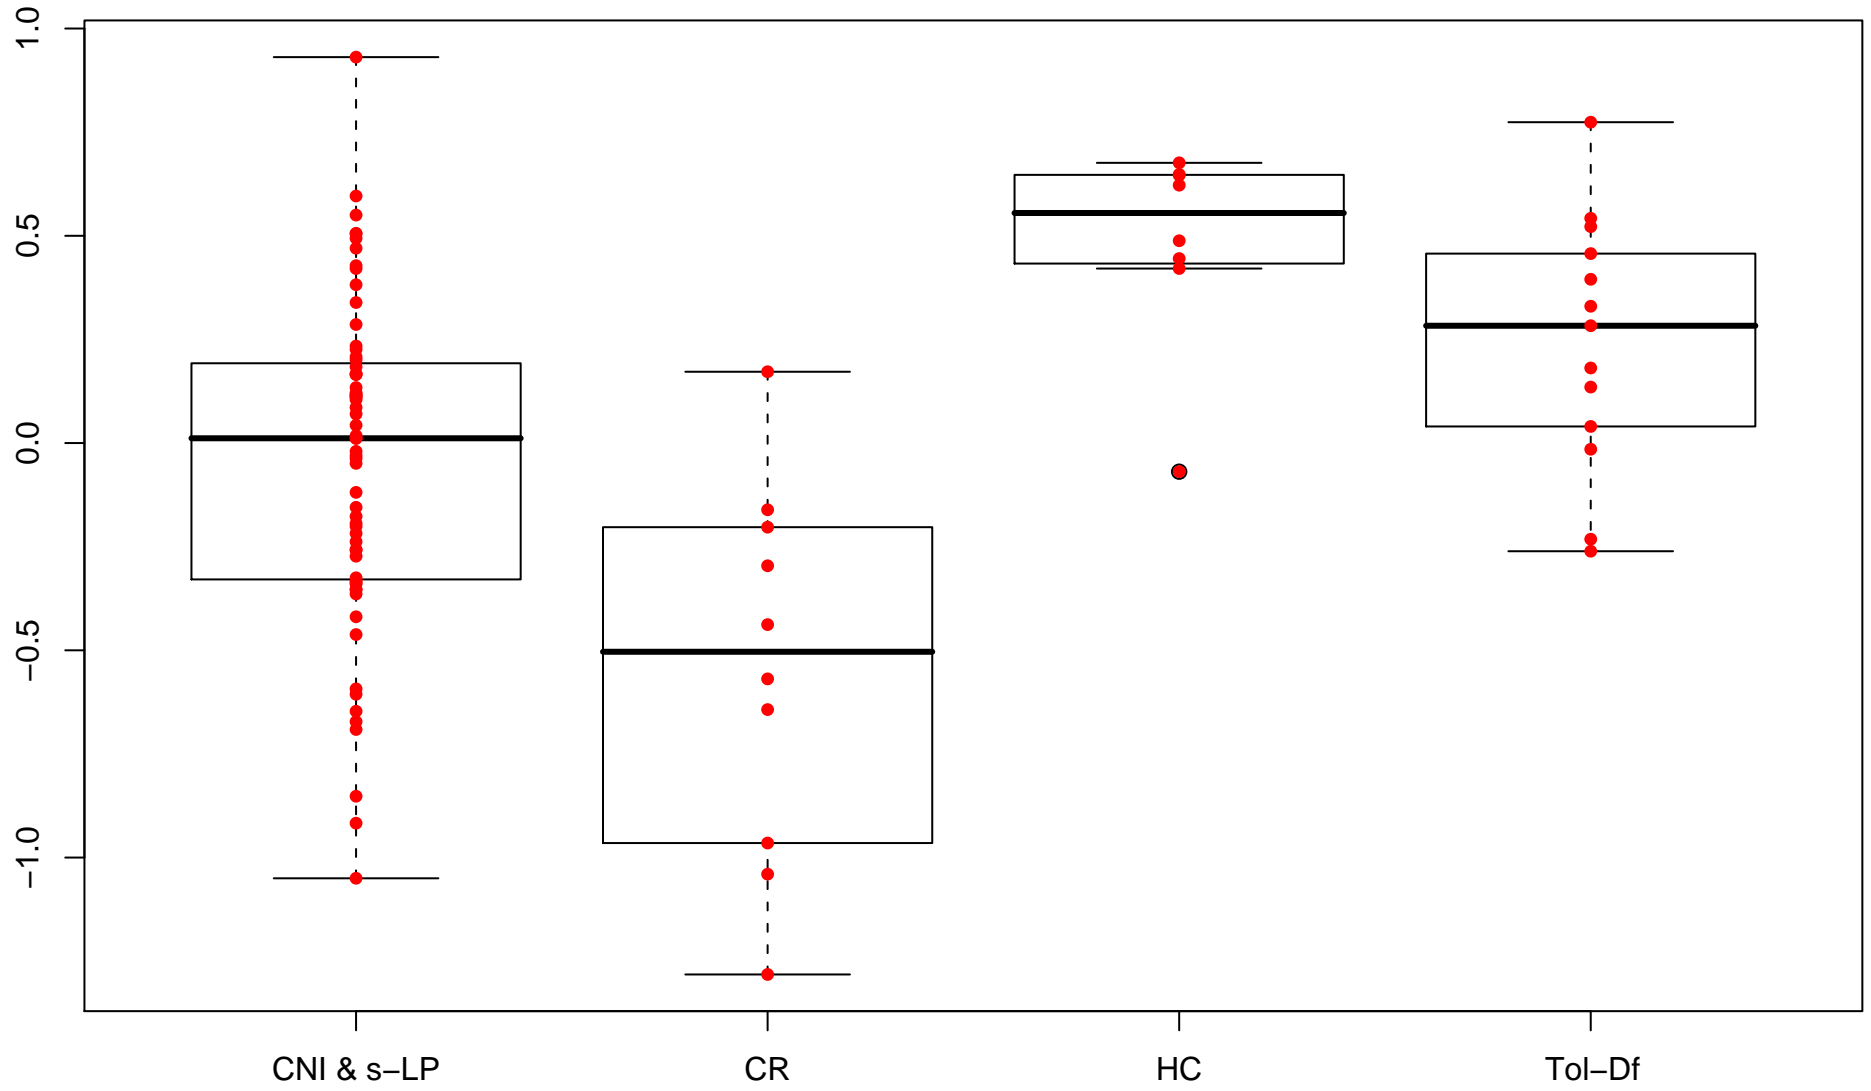



Rank 27 : EPO  
7.588e-06

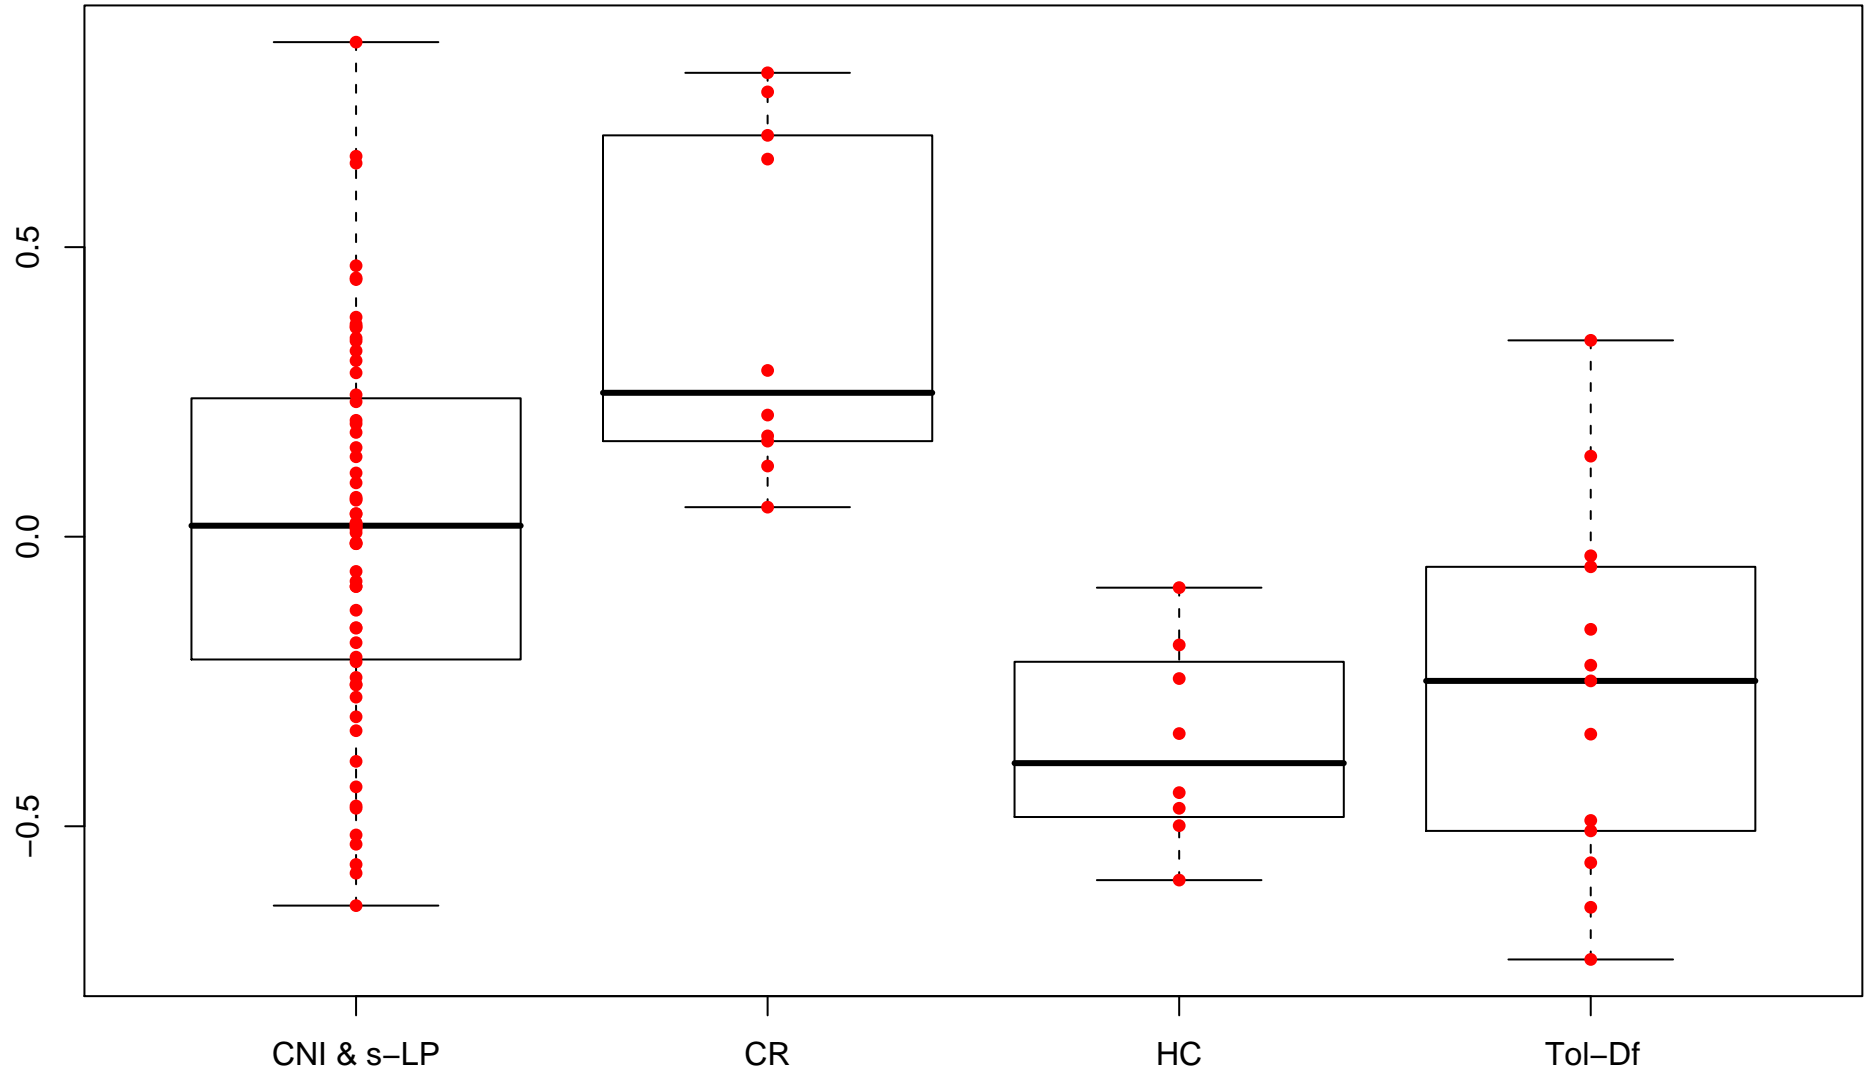

Rank 28 : ZAK  
7.962e-06

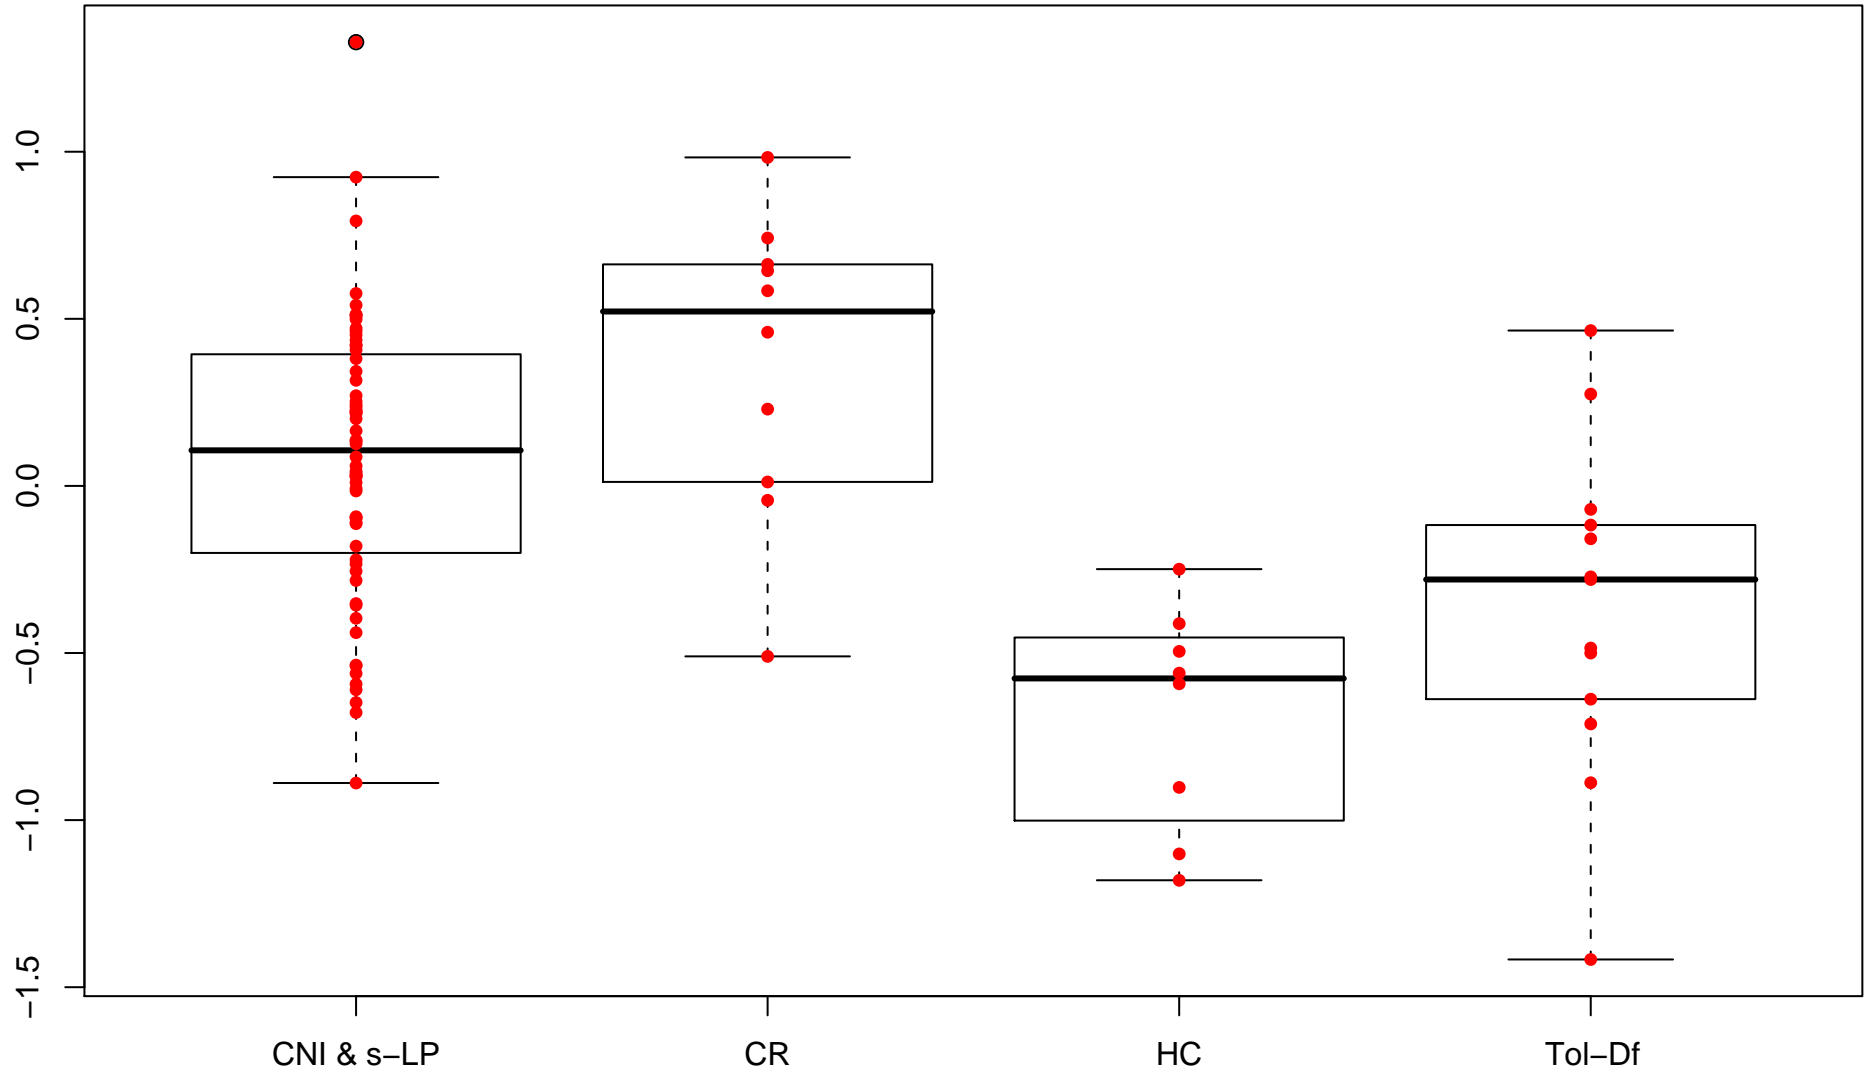

Rank 29 : CD40  
8.79e-06

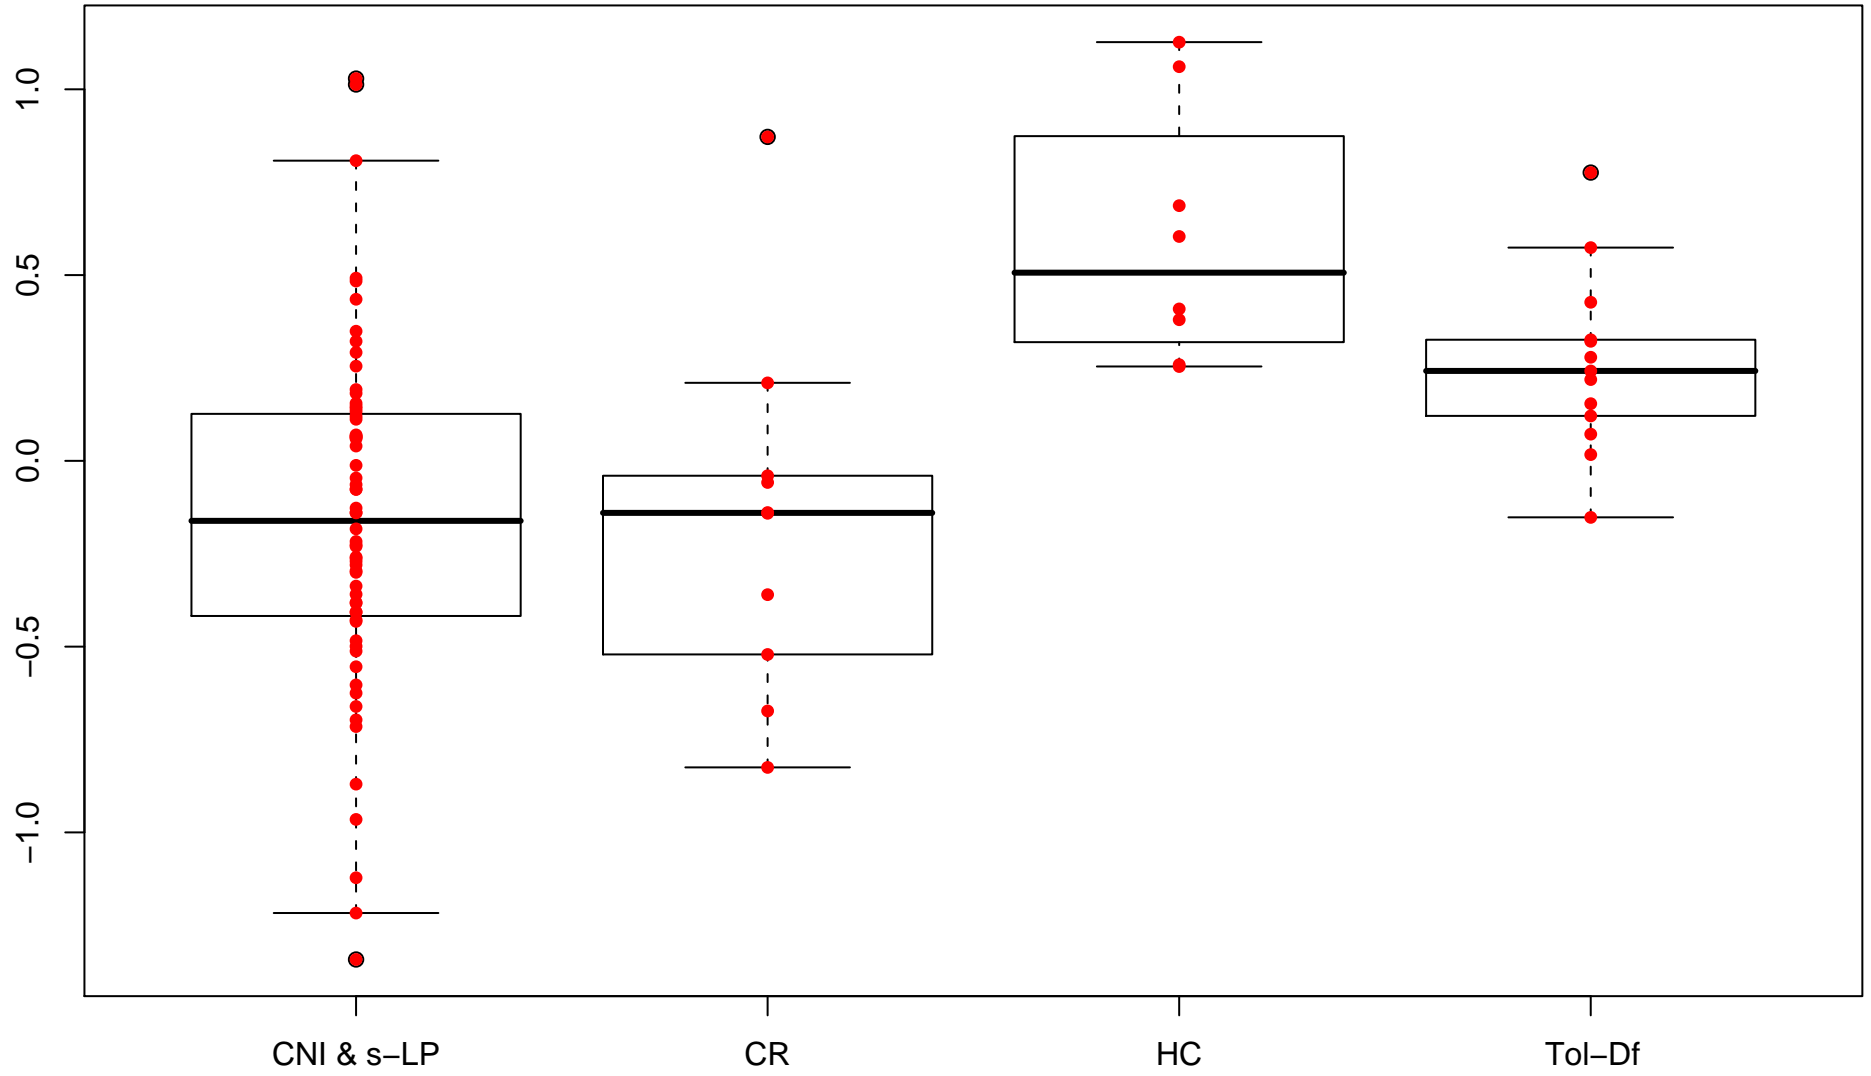

Rank 30 : CREB3L4  
9.191e-06

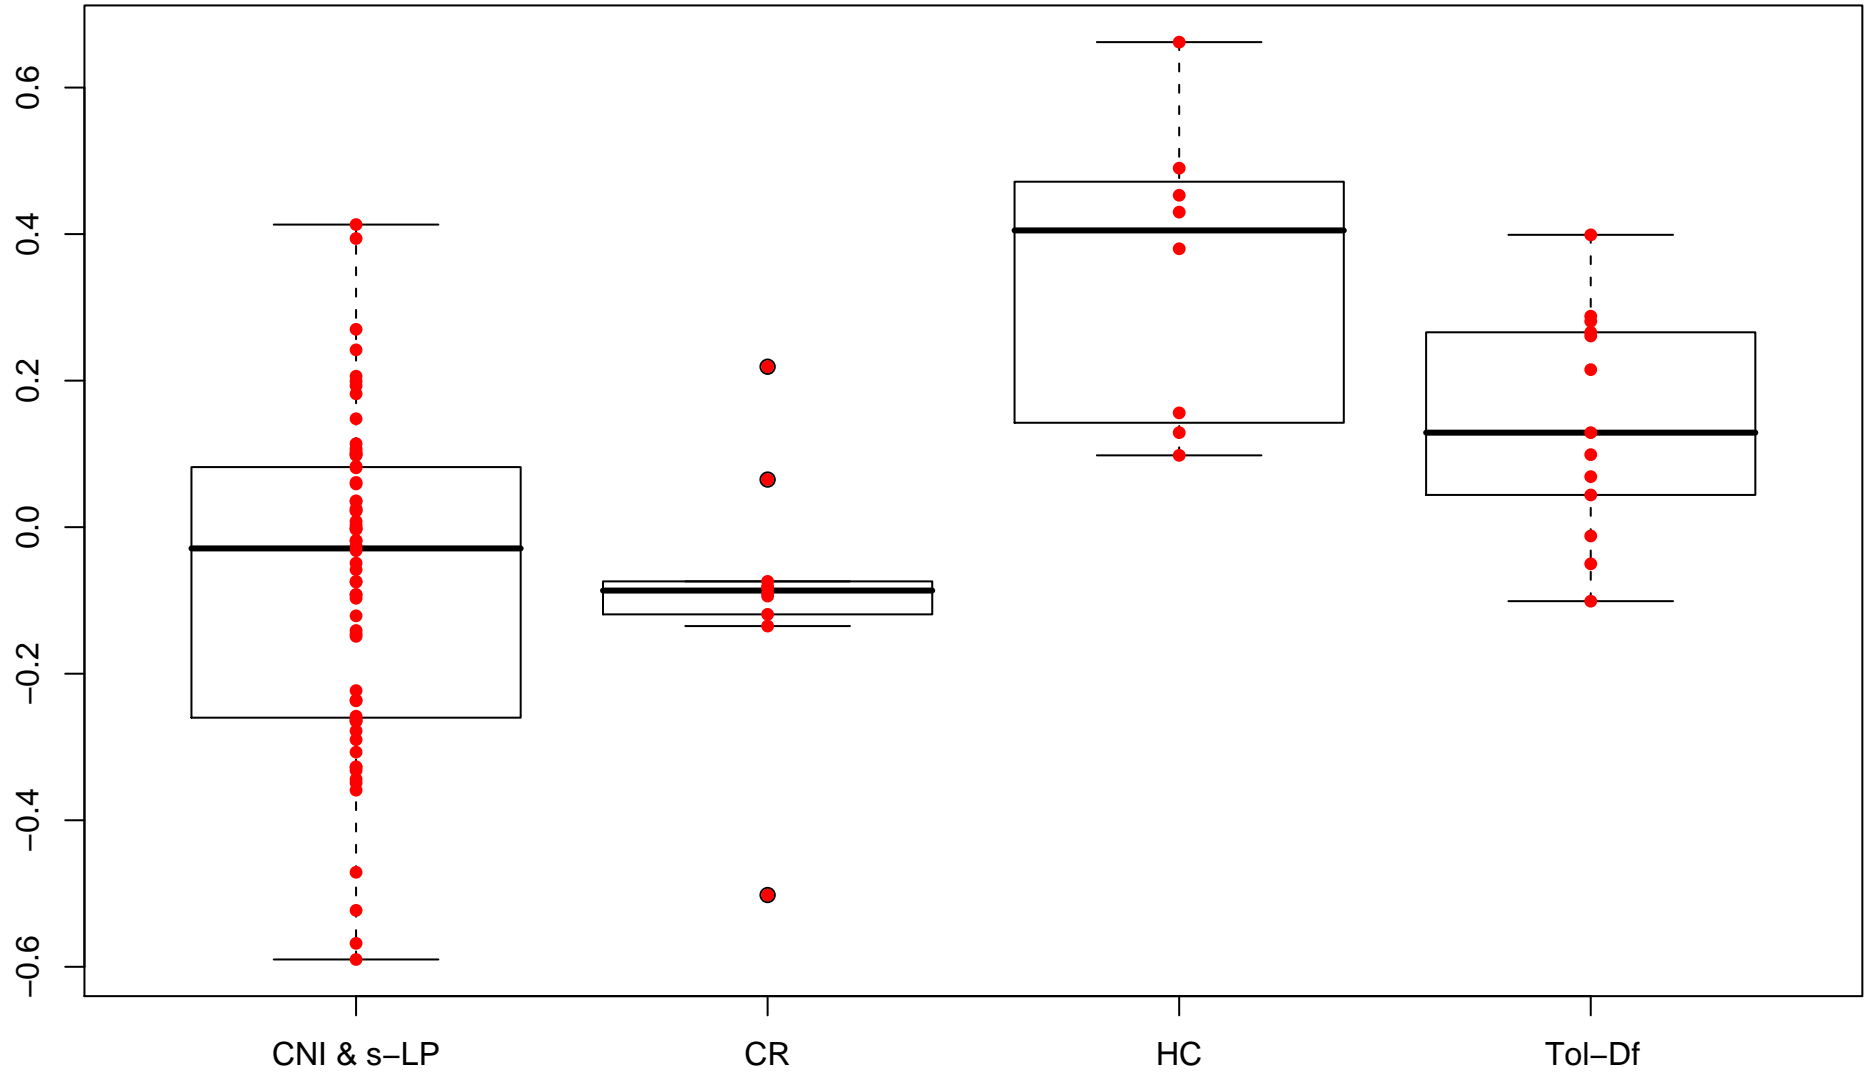

Rank 31 : IGHM  
9.729e-06

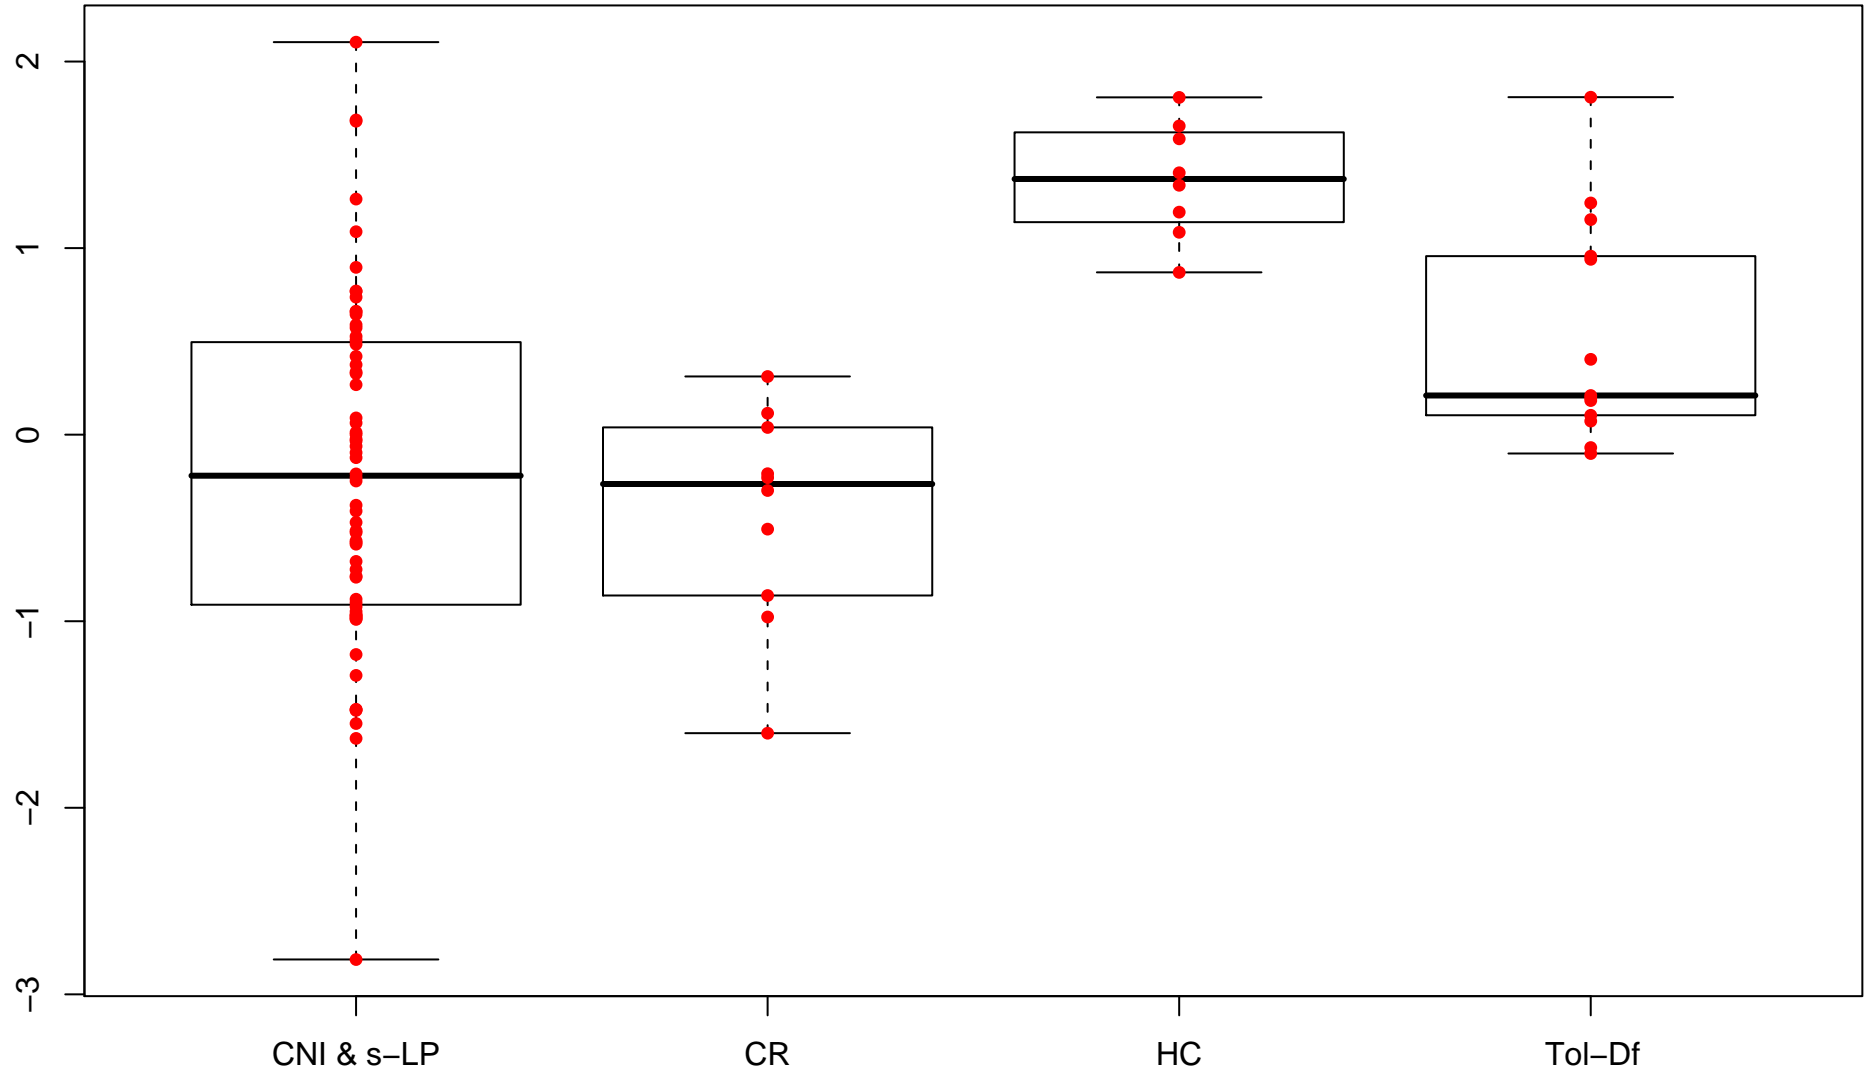

Rank 32 : ADAM17  
1.0187e-05

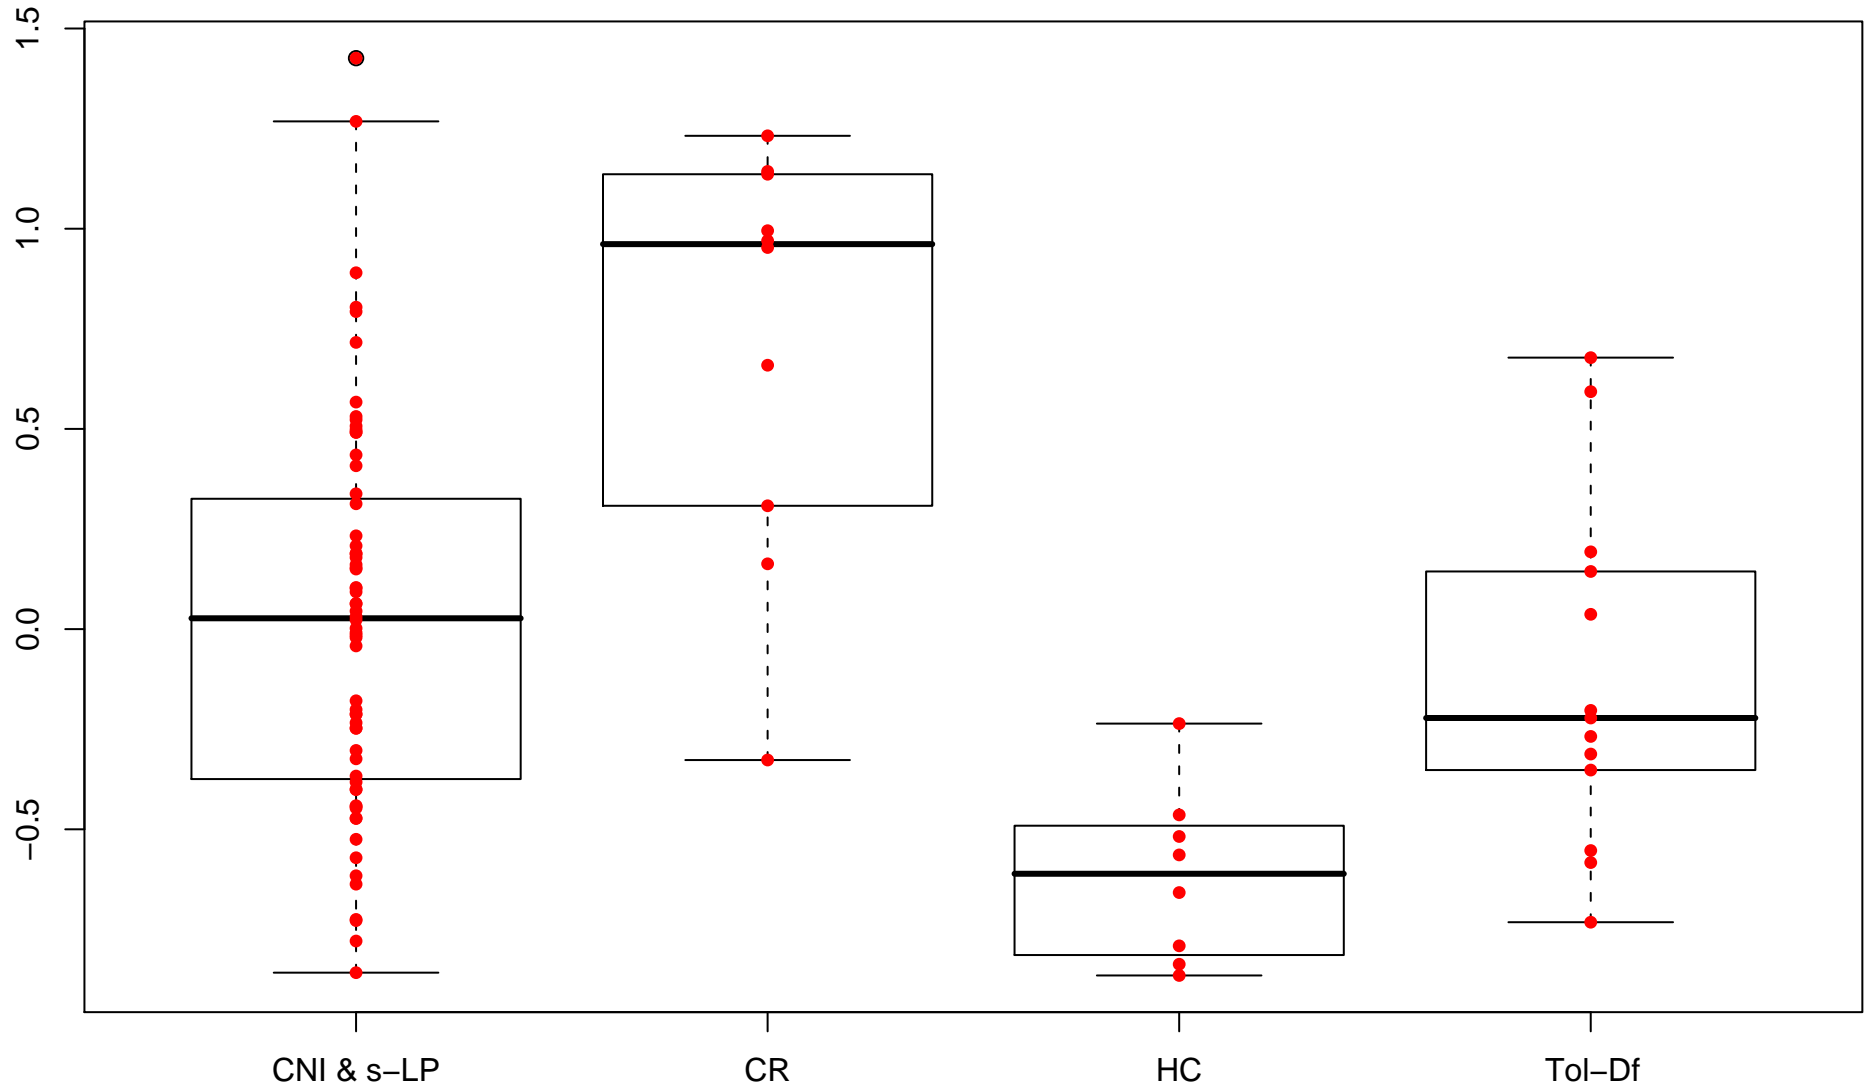

Rank 33 : SH2D1B  
1.098e-05

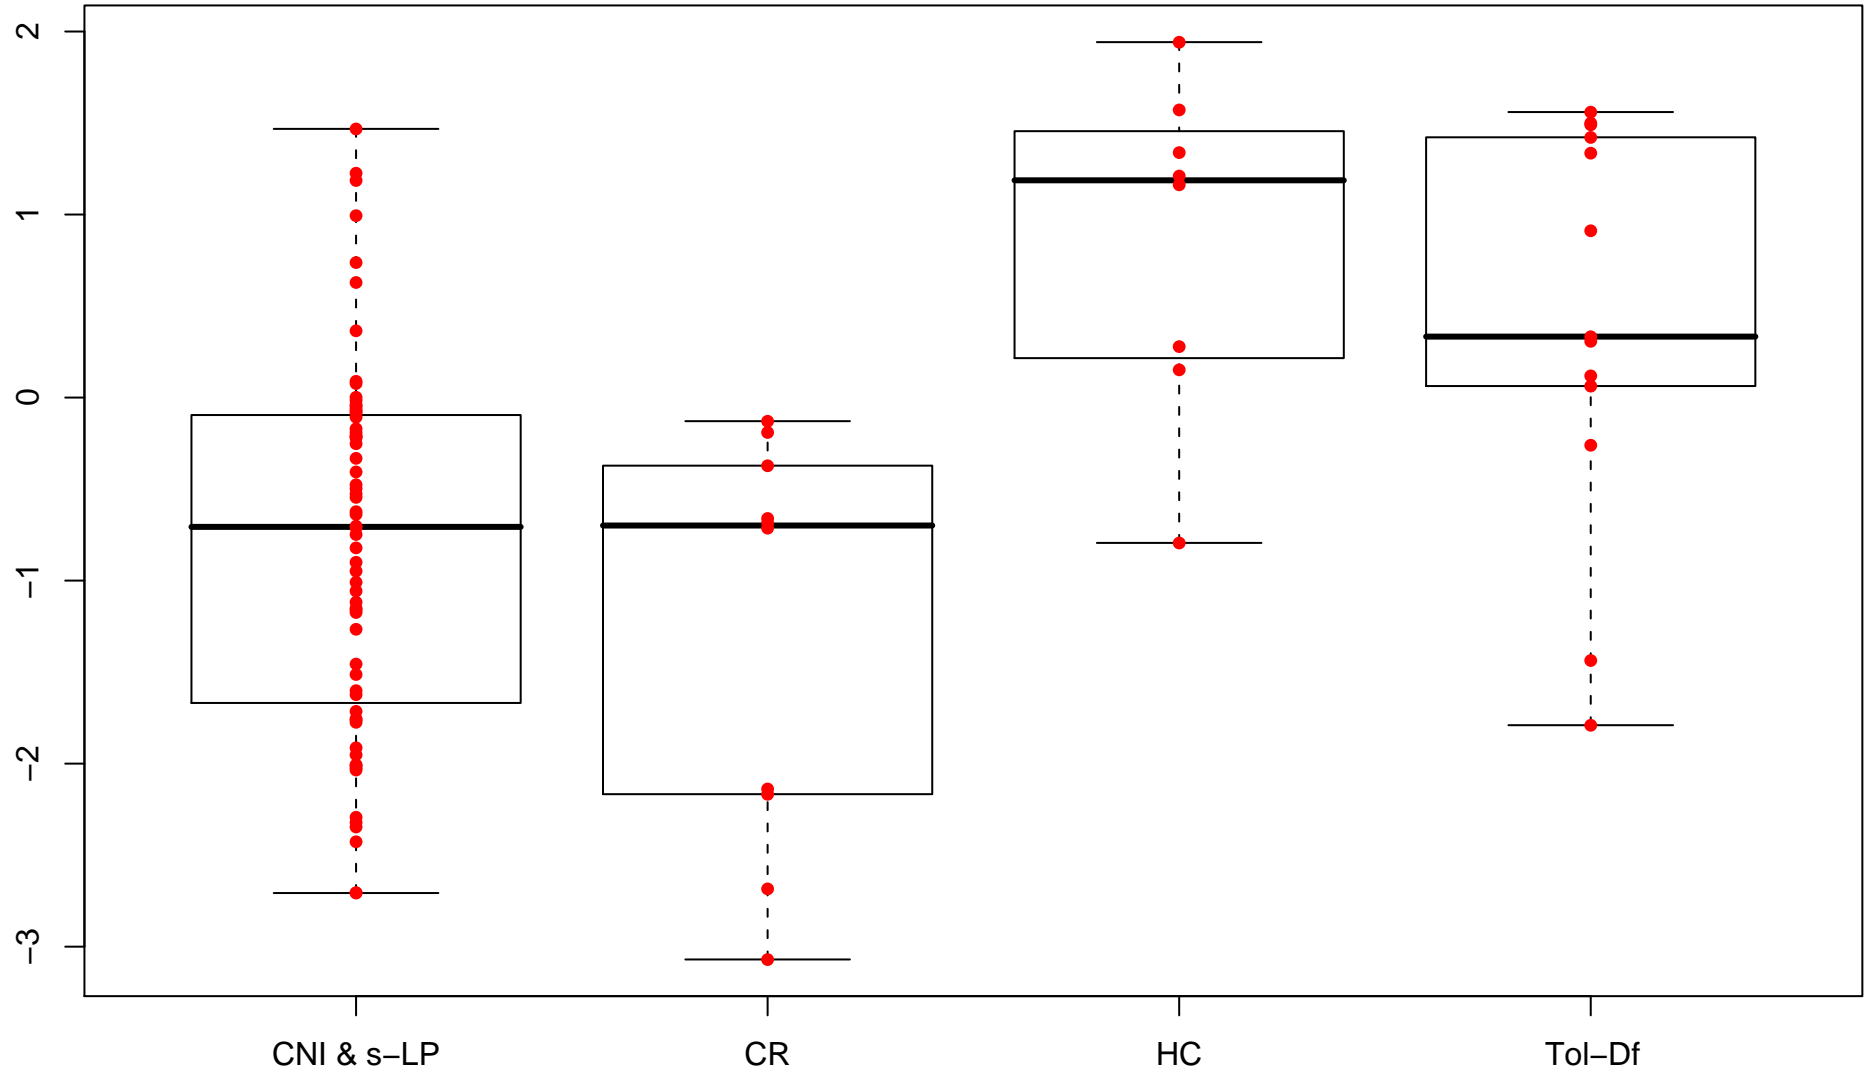

Rank 34 : AKR1C3  
1.1499e-05

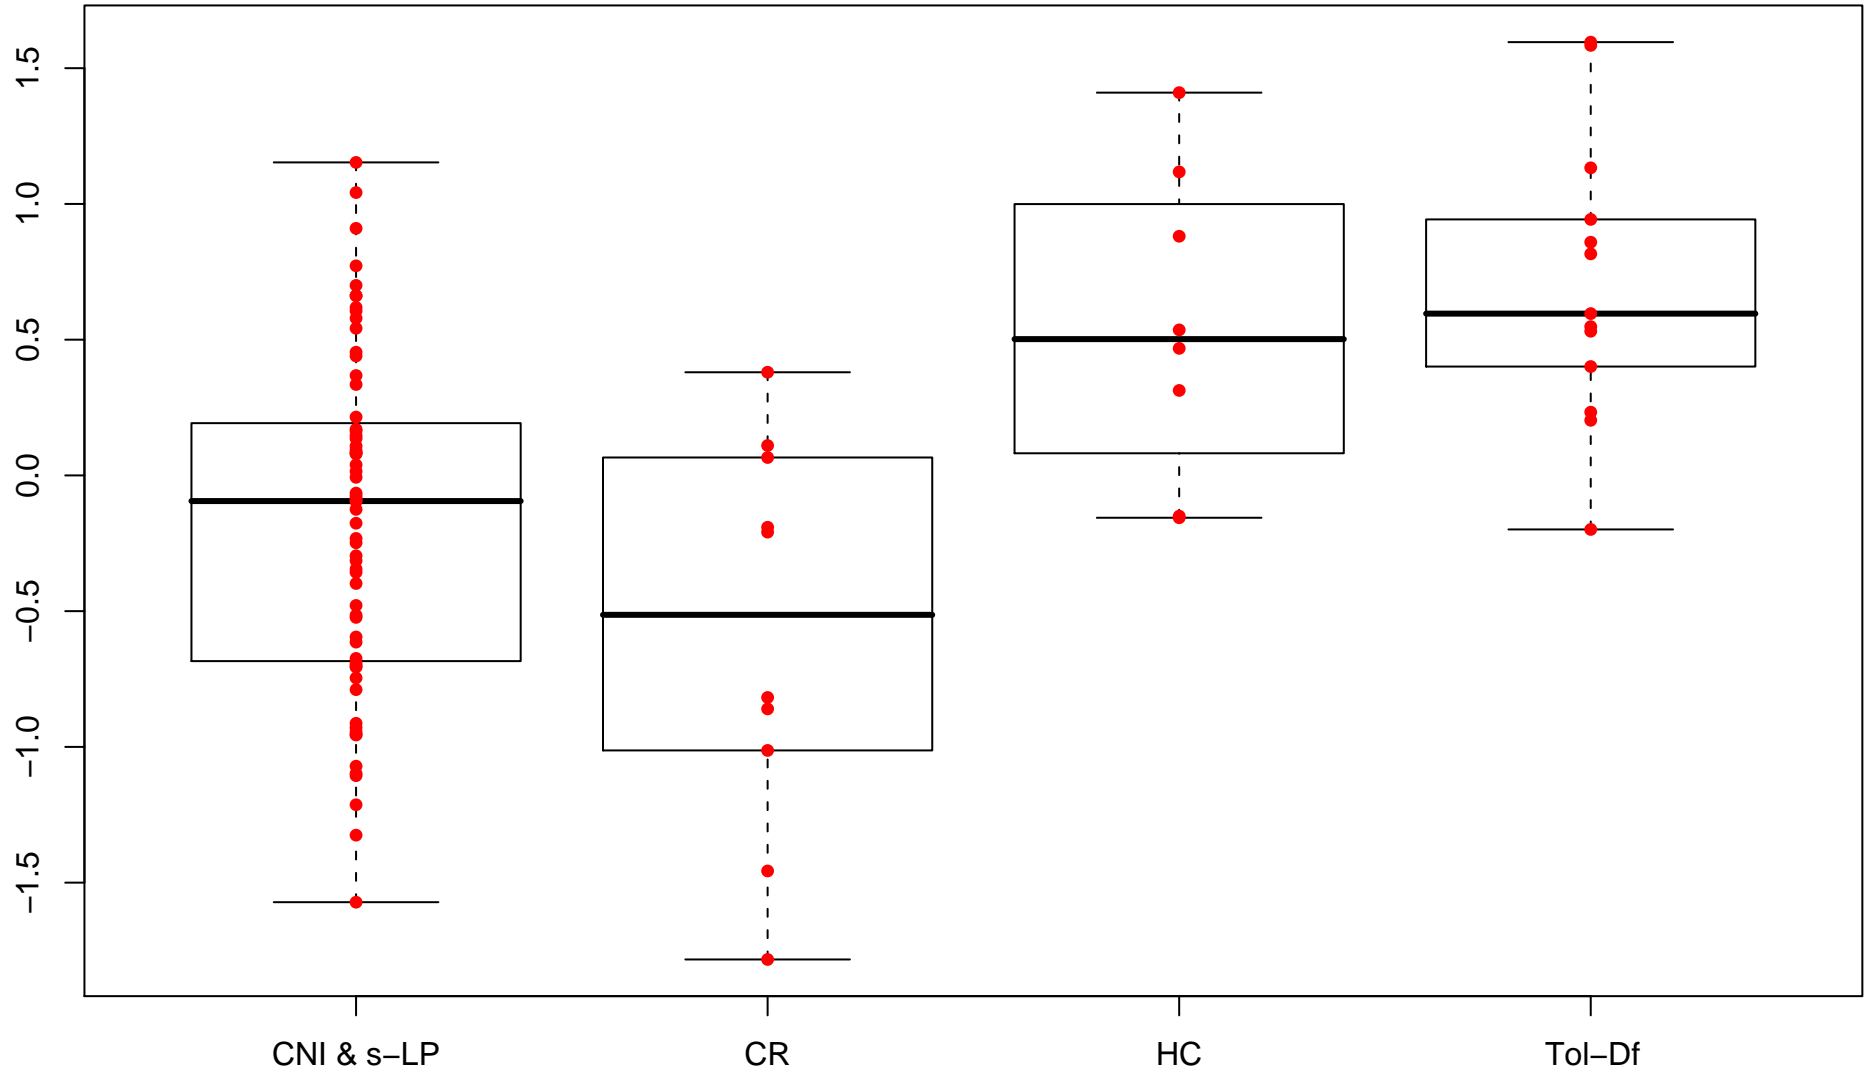



Rank 35 : CASD1  
1.2146e-05

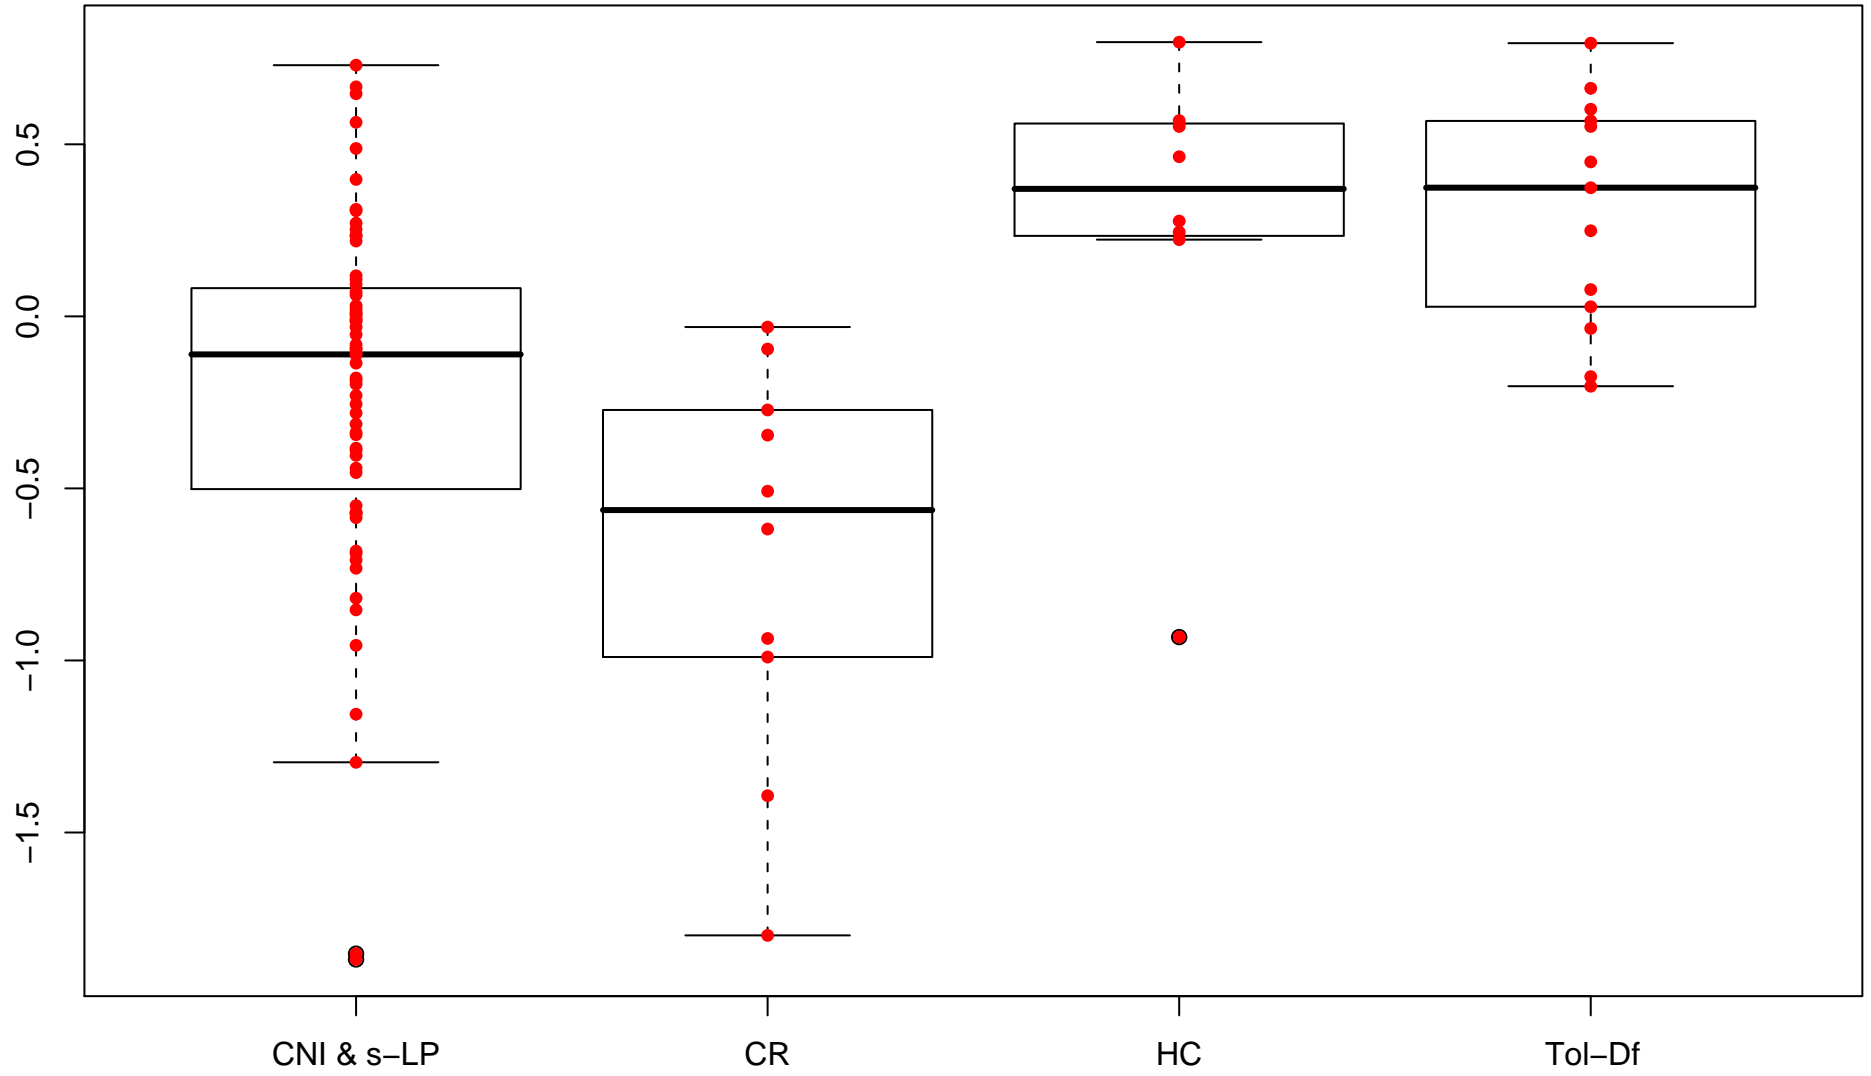

Rank 36 : FCRLA  
1.3121e-05

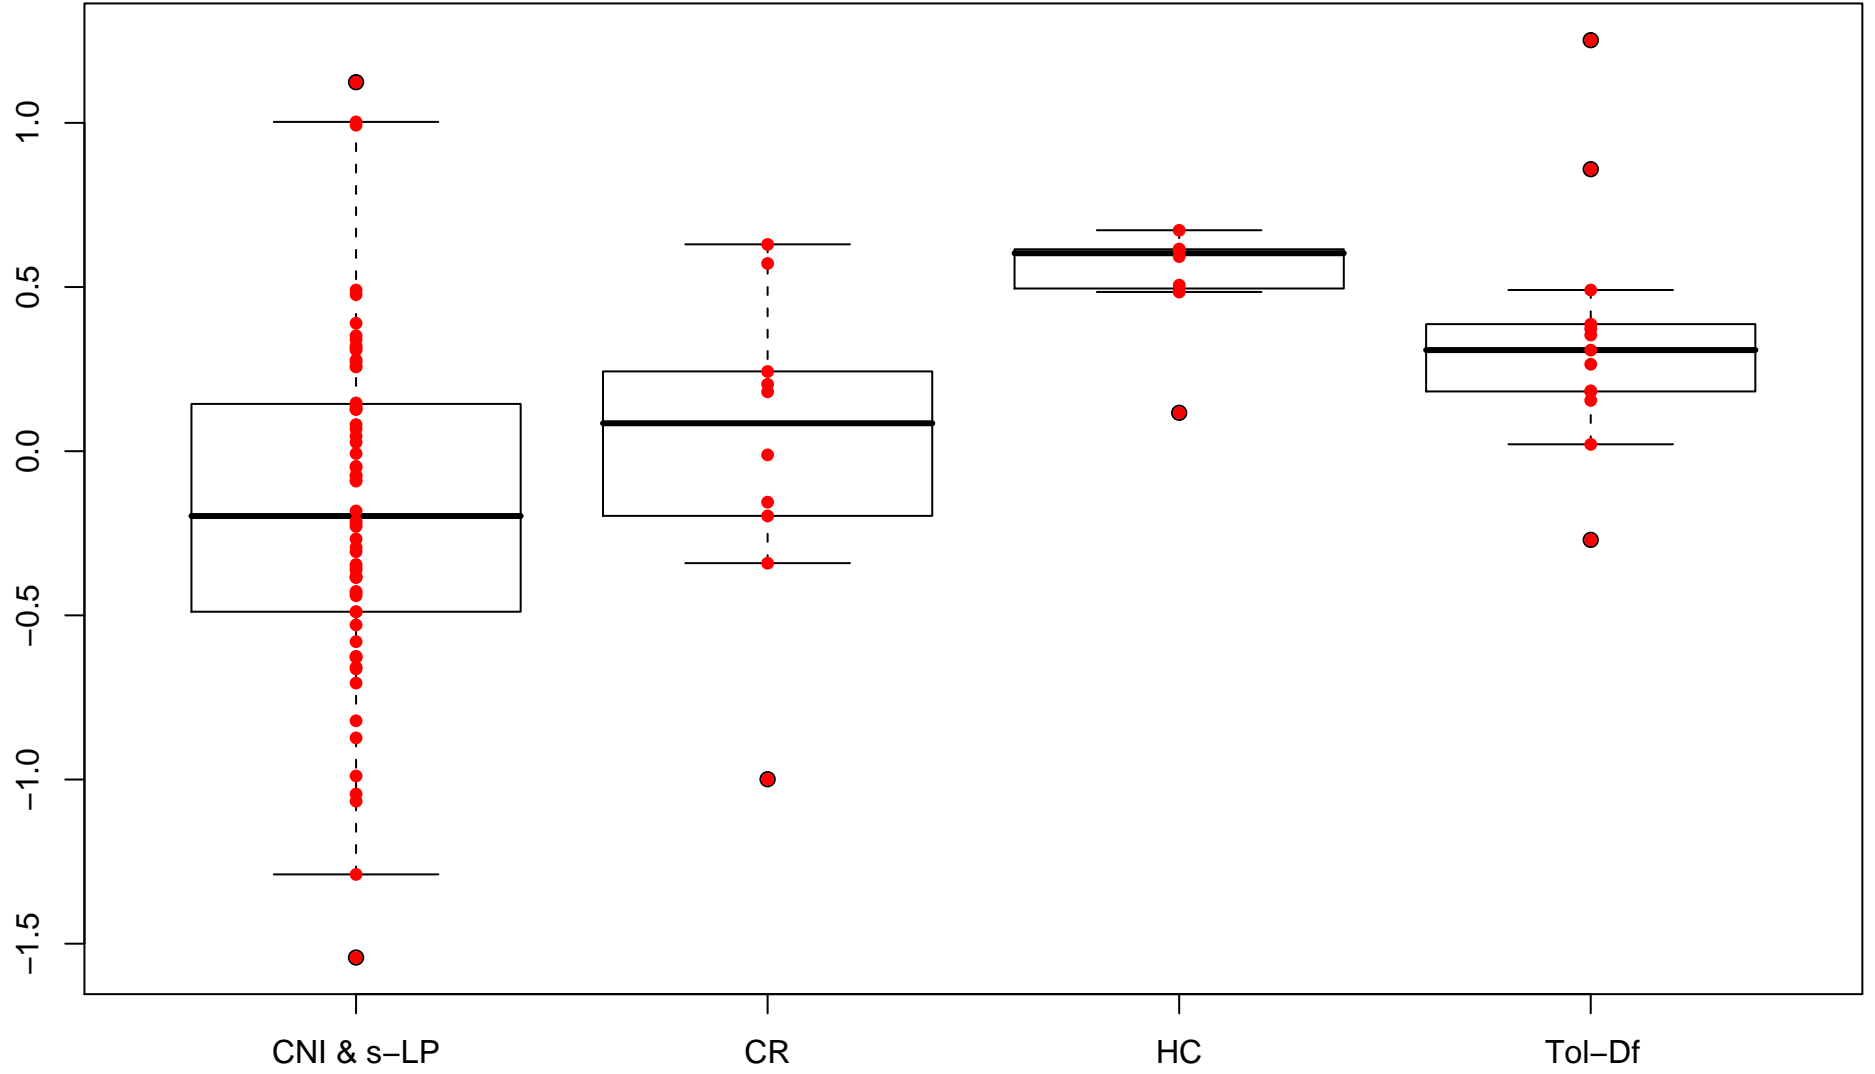

Rank 37 : BTLA  
1.4511e-05

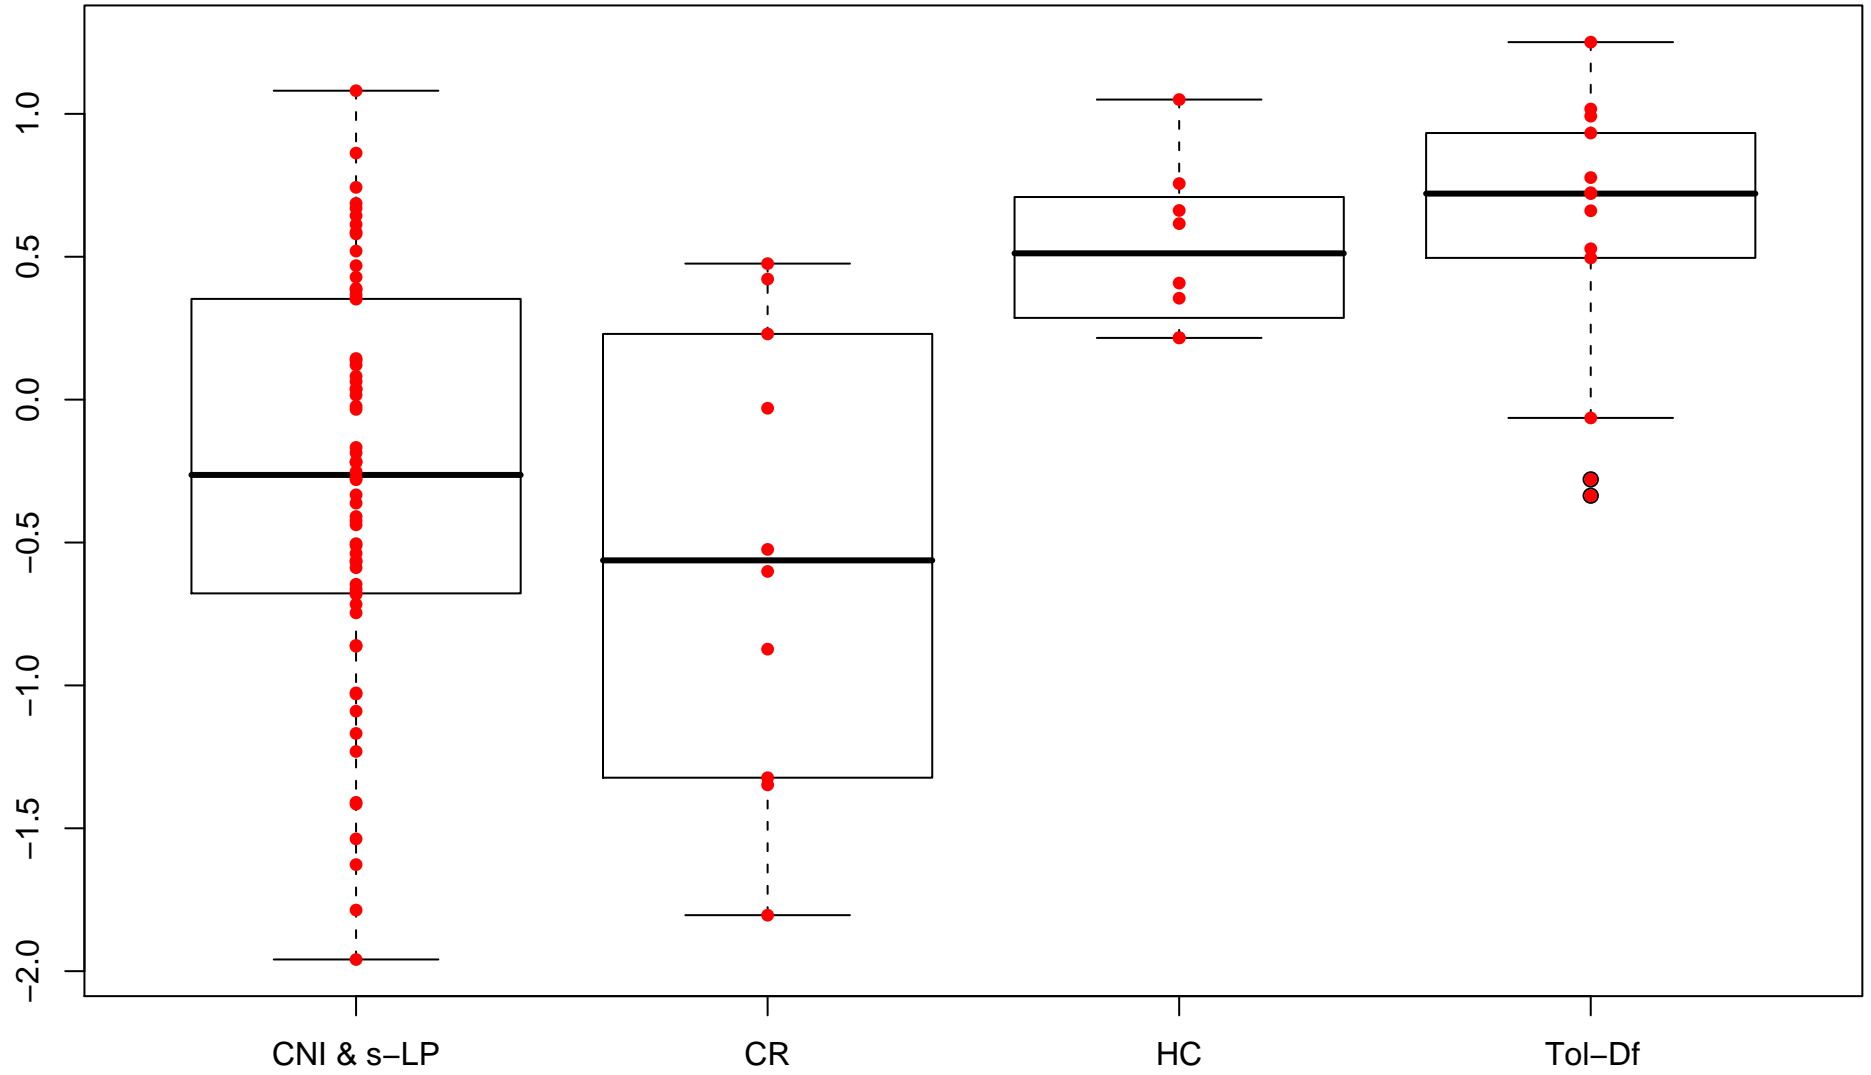

Rank 38 : COL4A3BP  
1.5407e-05

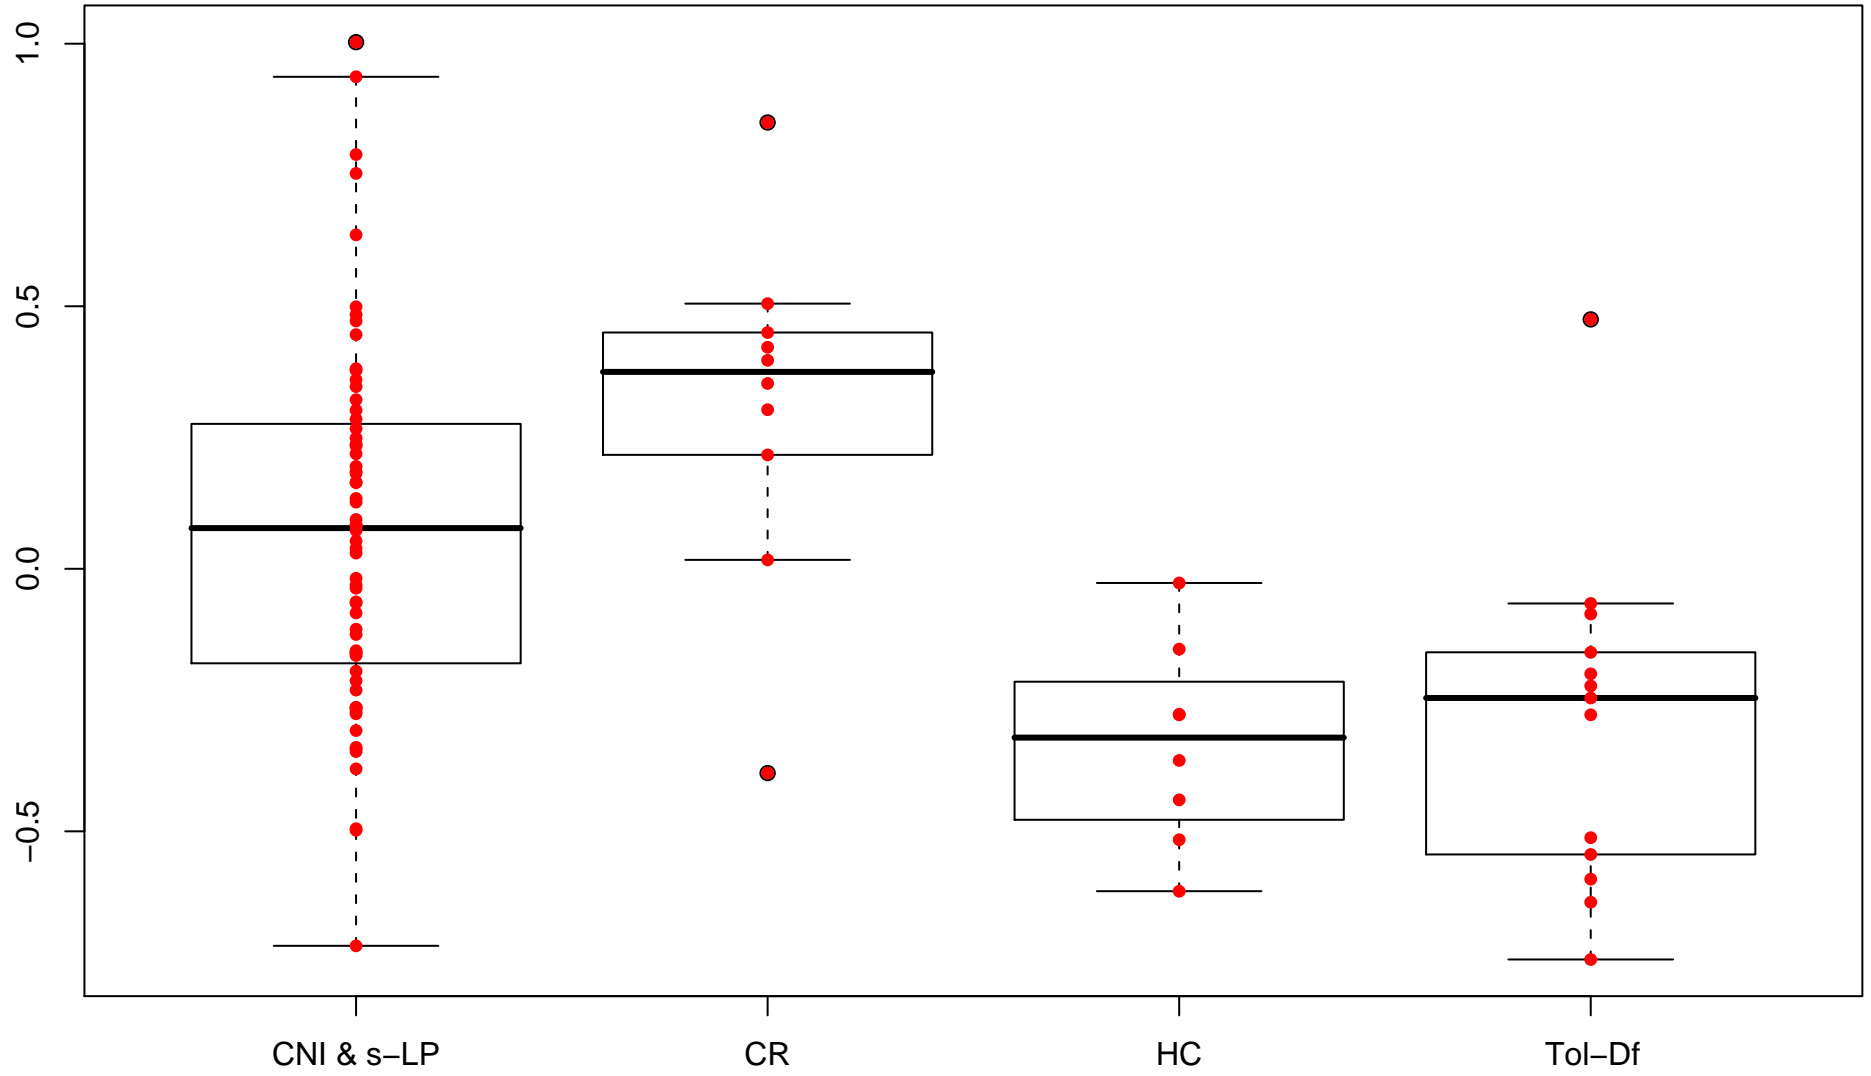

Rank 39 : CLCN5  
1.5726e-05

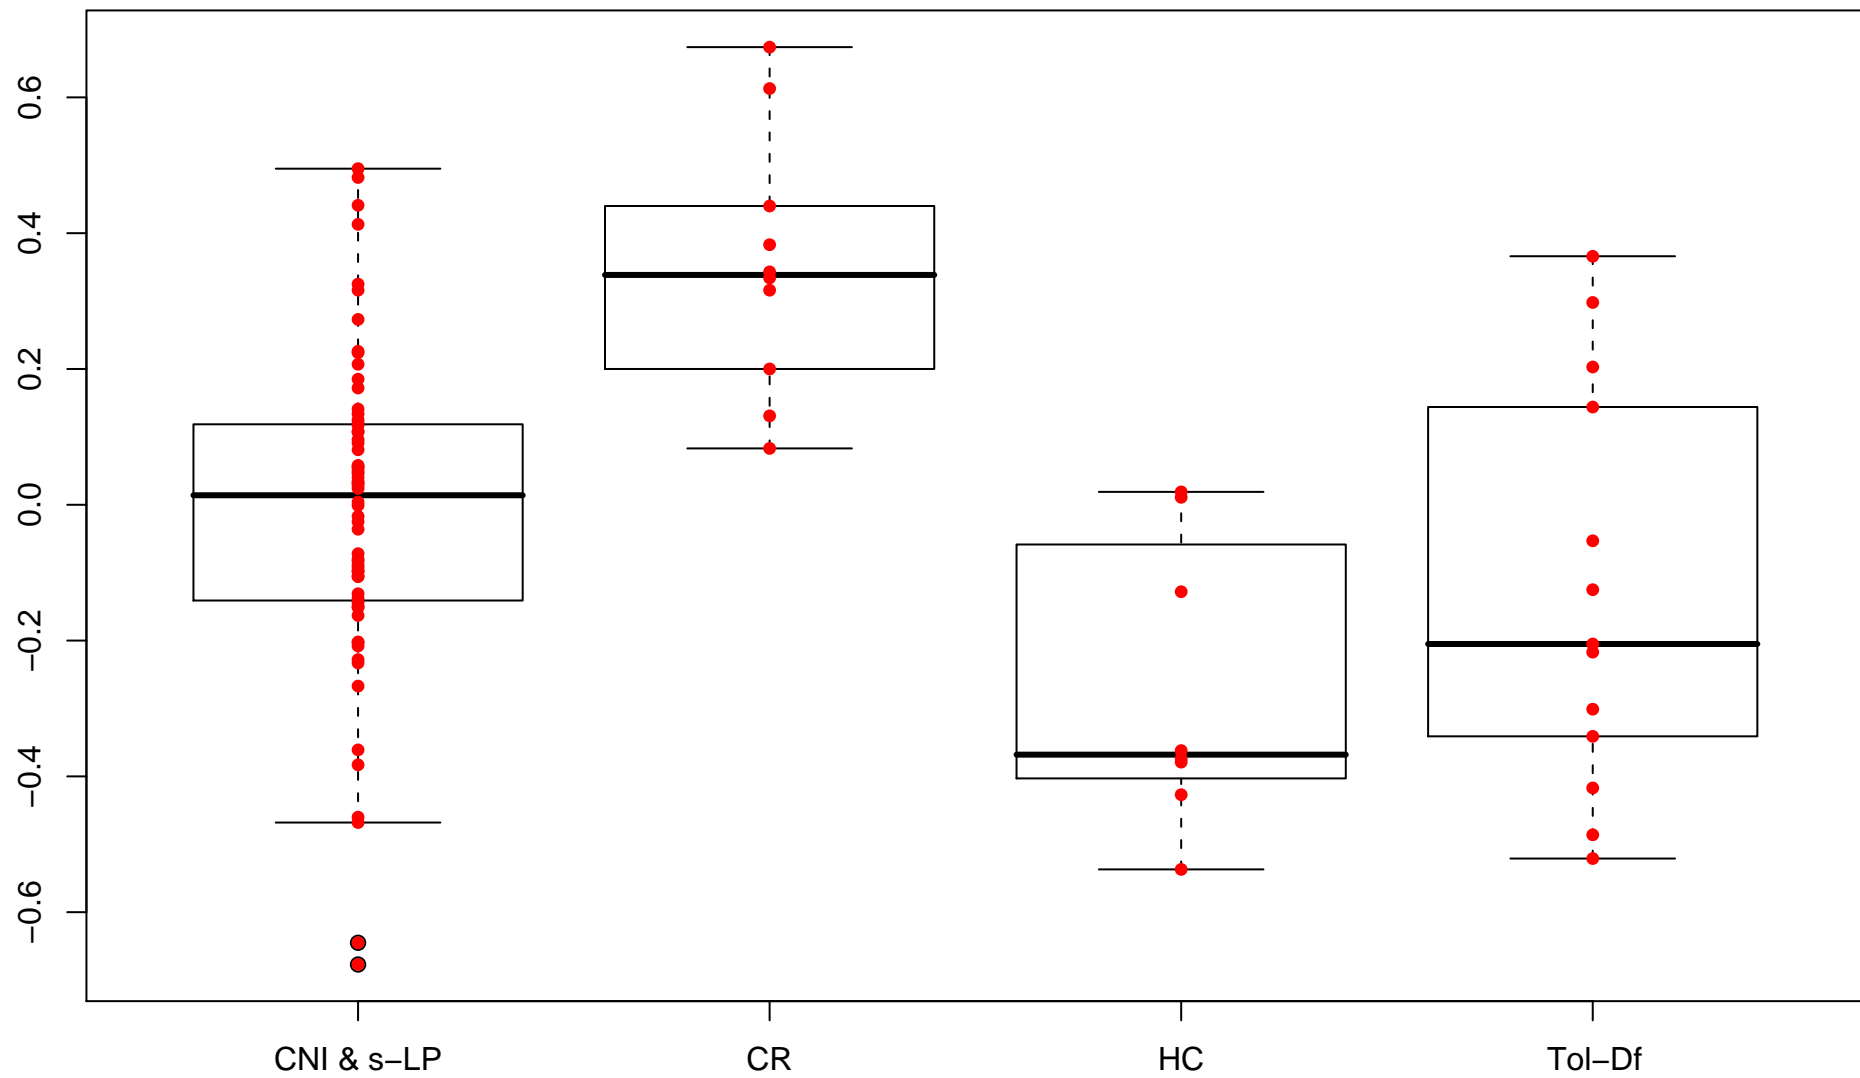

Rank 40 : LHFPL2  
1.6299e-05

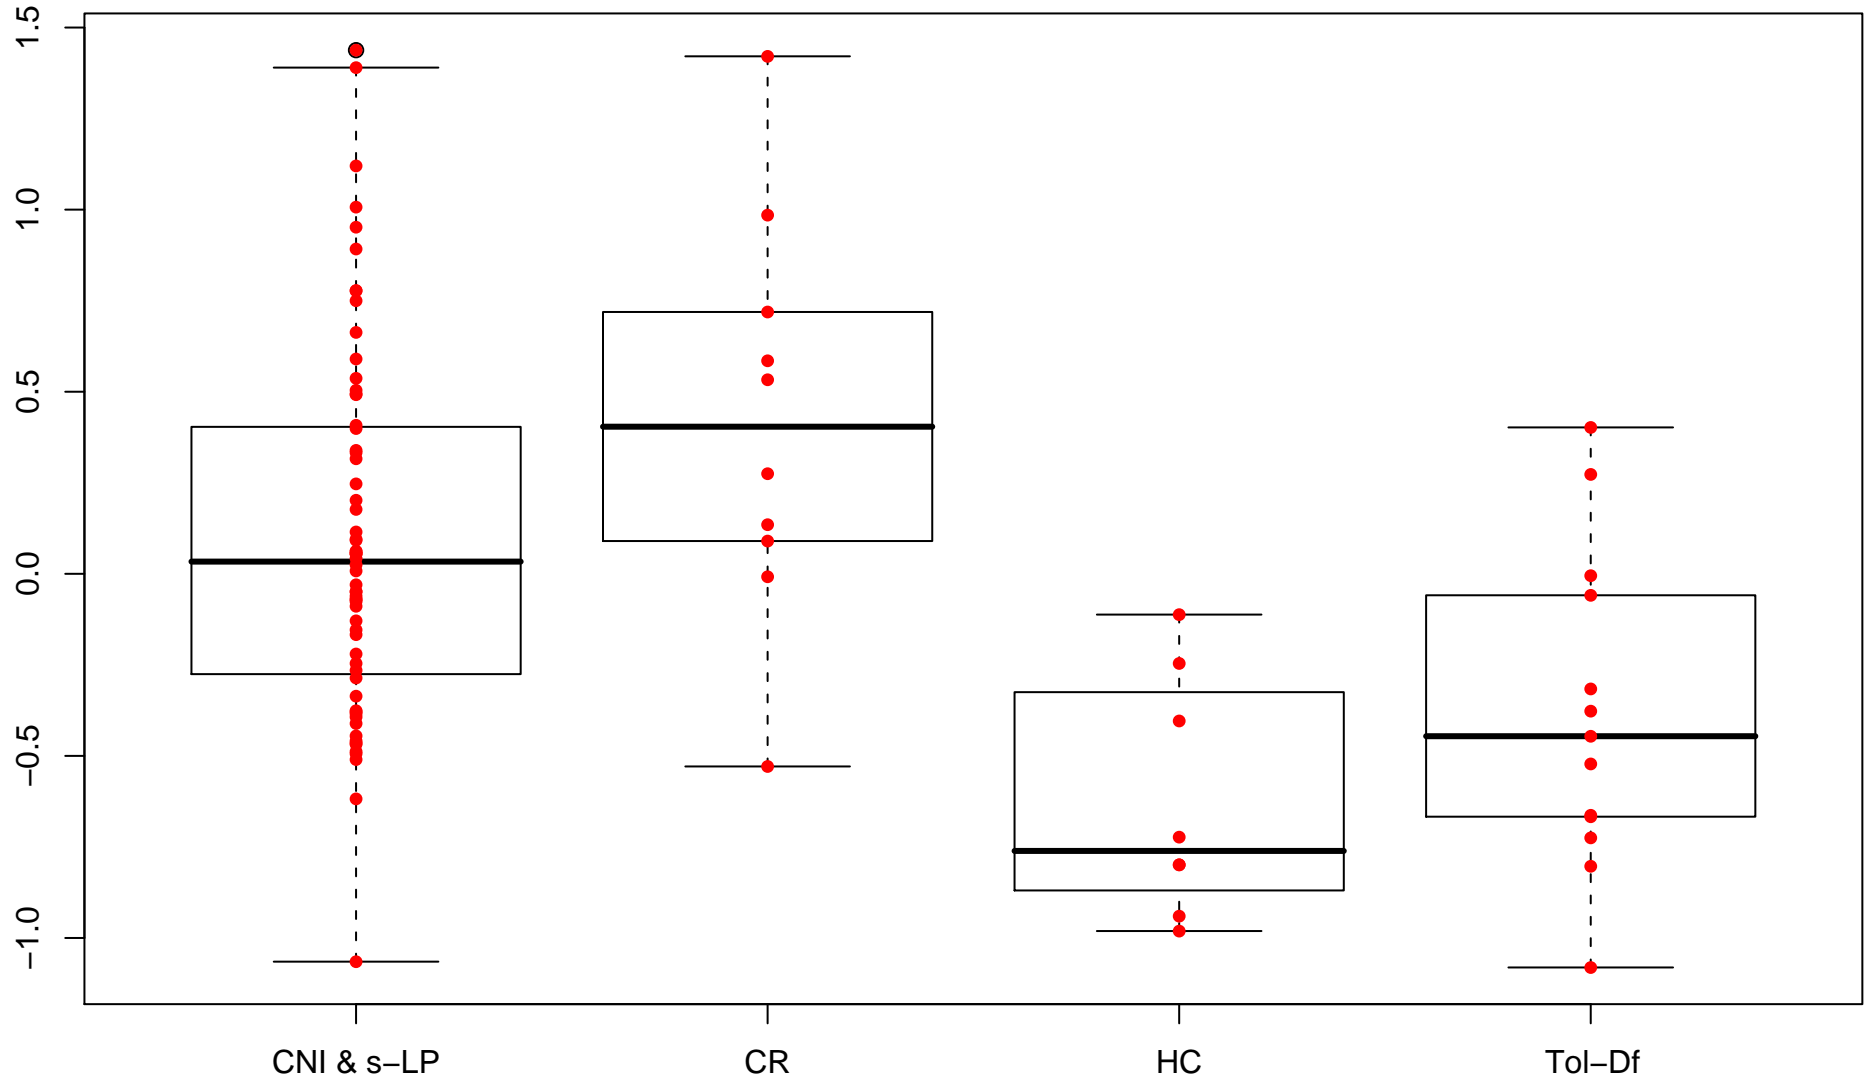

Rank 41 : ARG1  
1.676e-05

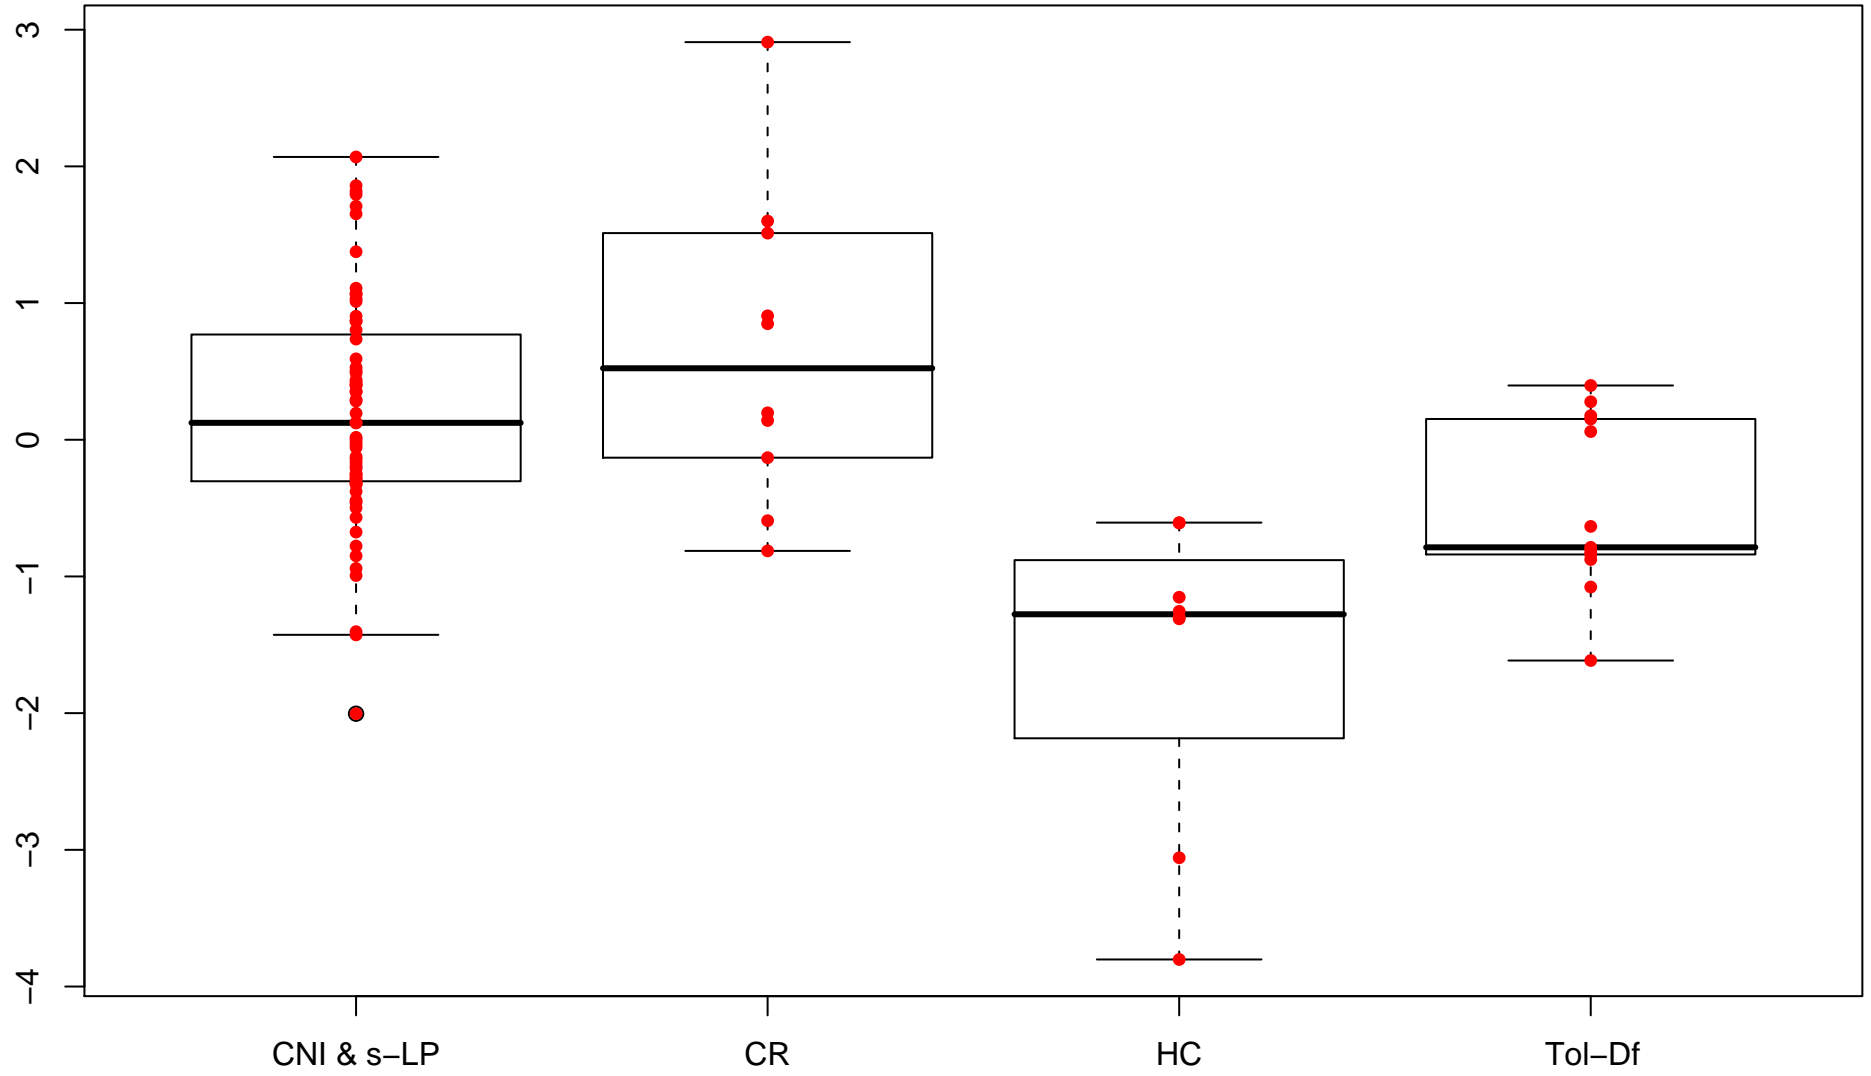

Rank 42 : ANXA3  
1.6942e-05

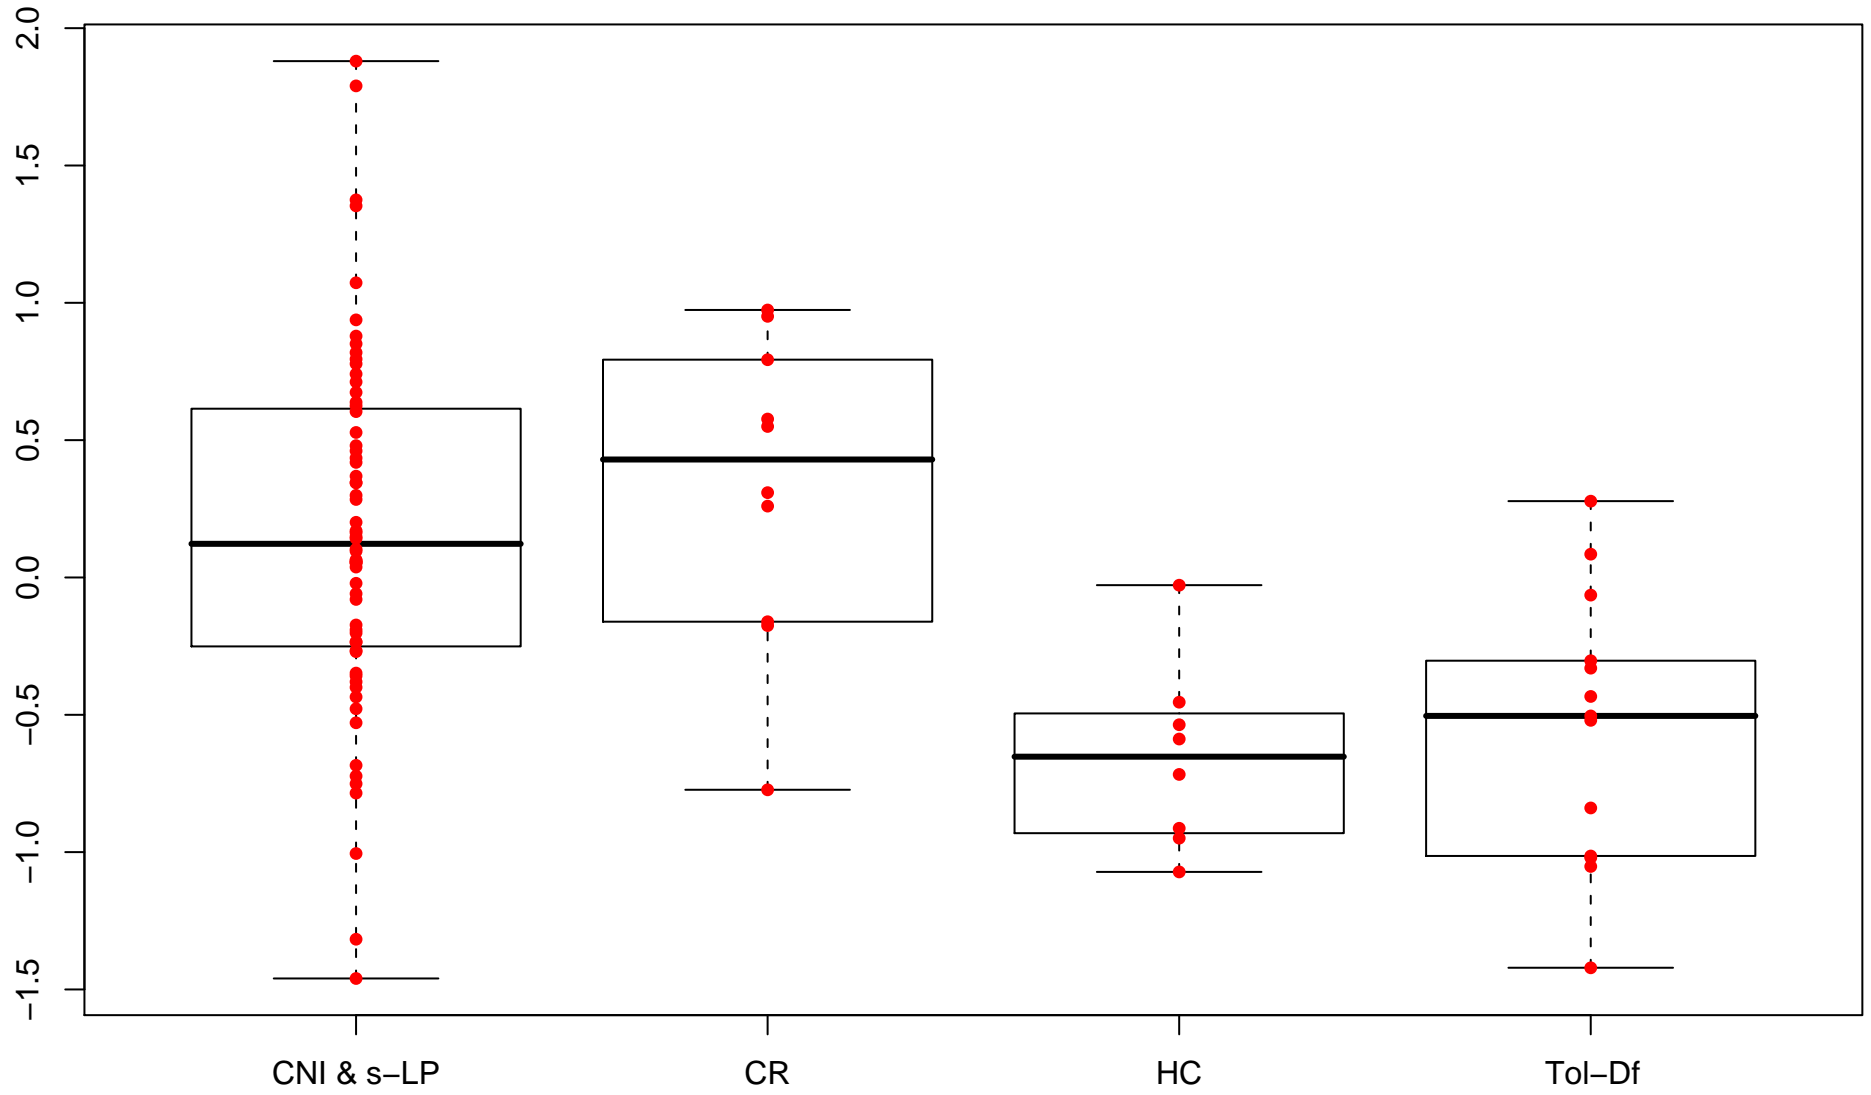



Rank 43 : HLA-DOA  
1.8553e-05

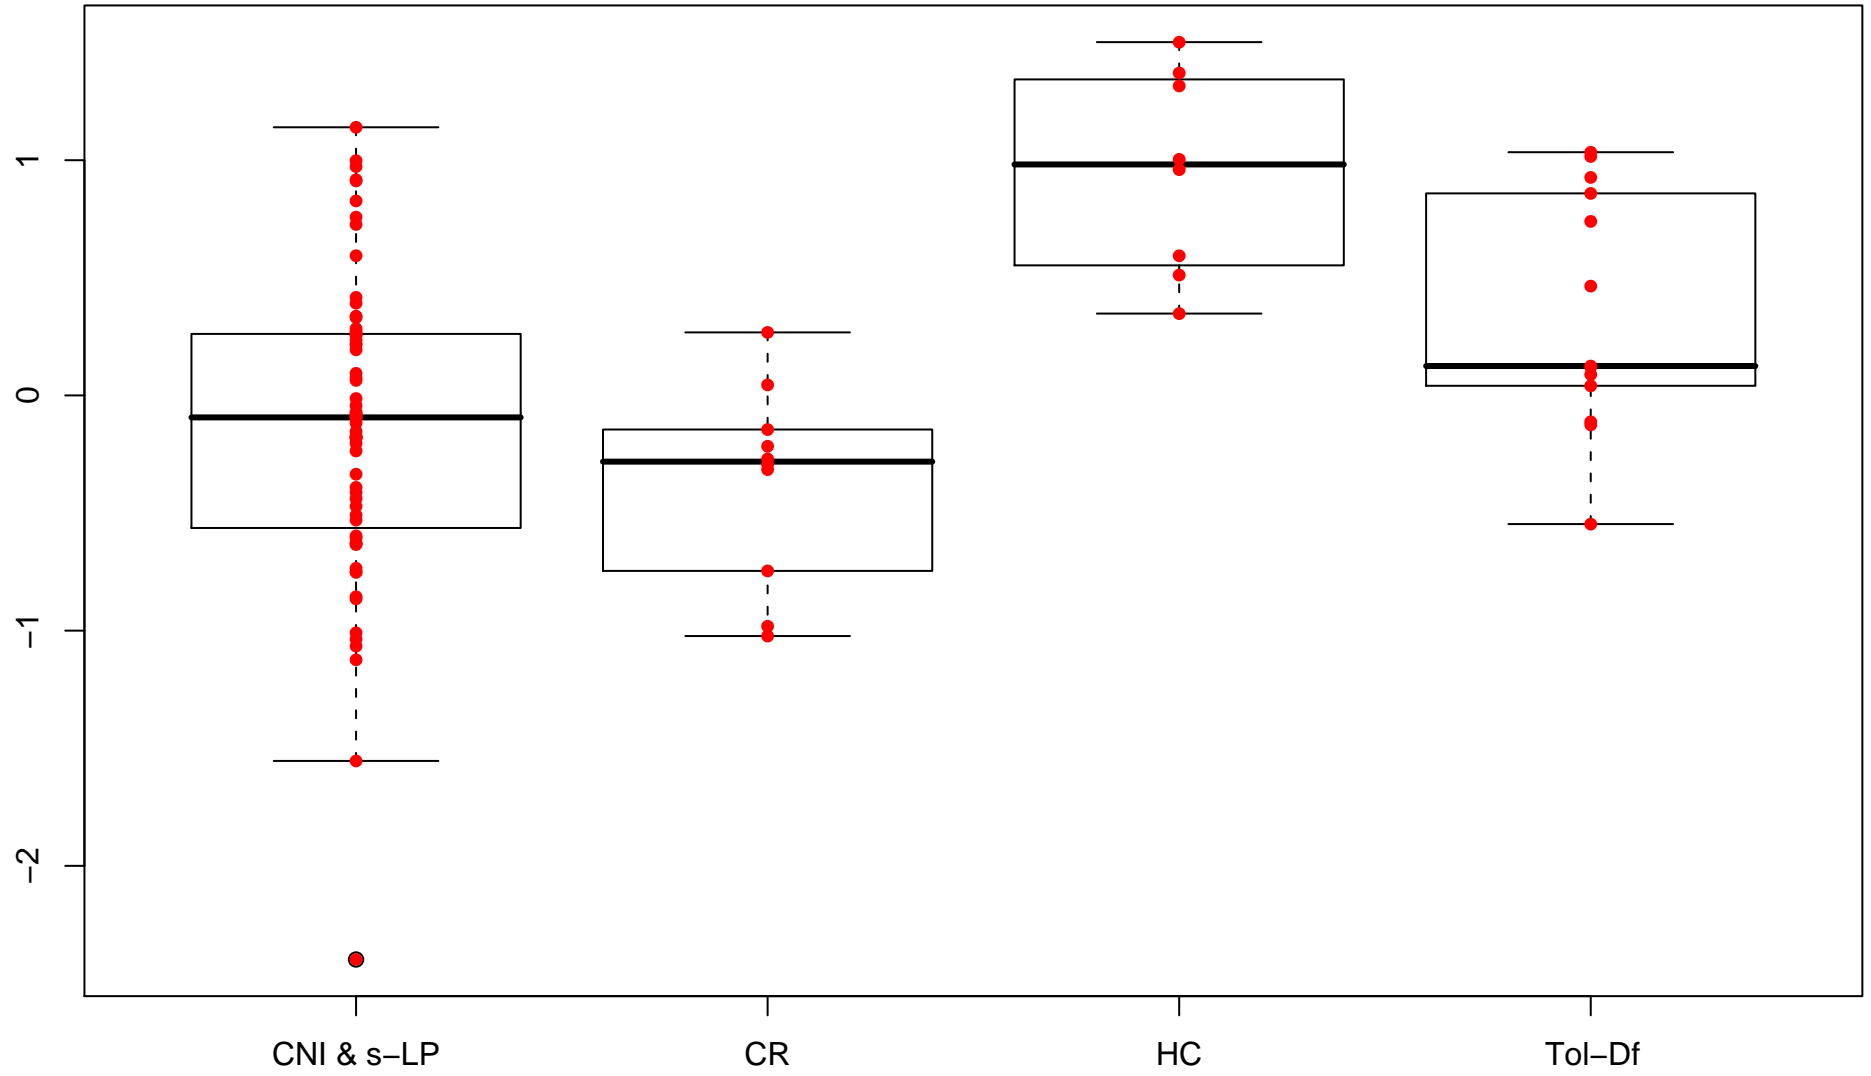

Rank 44 : KLRF1  
1.9078e-05

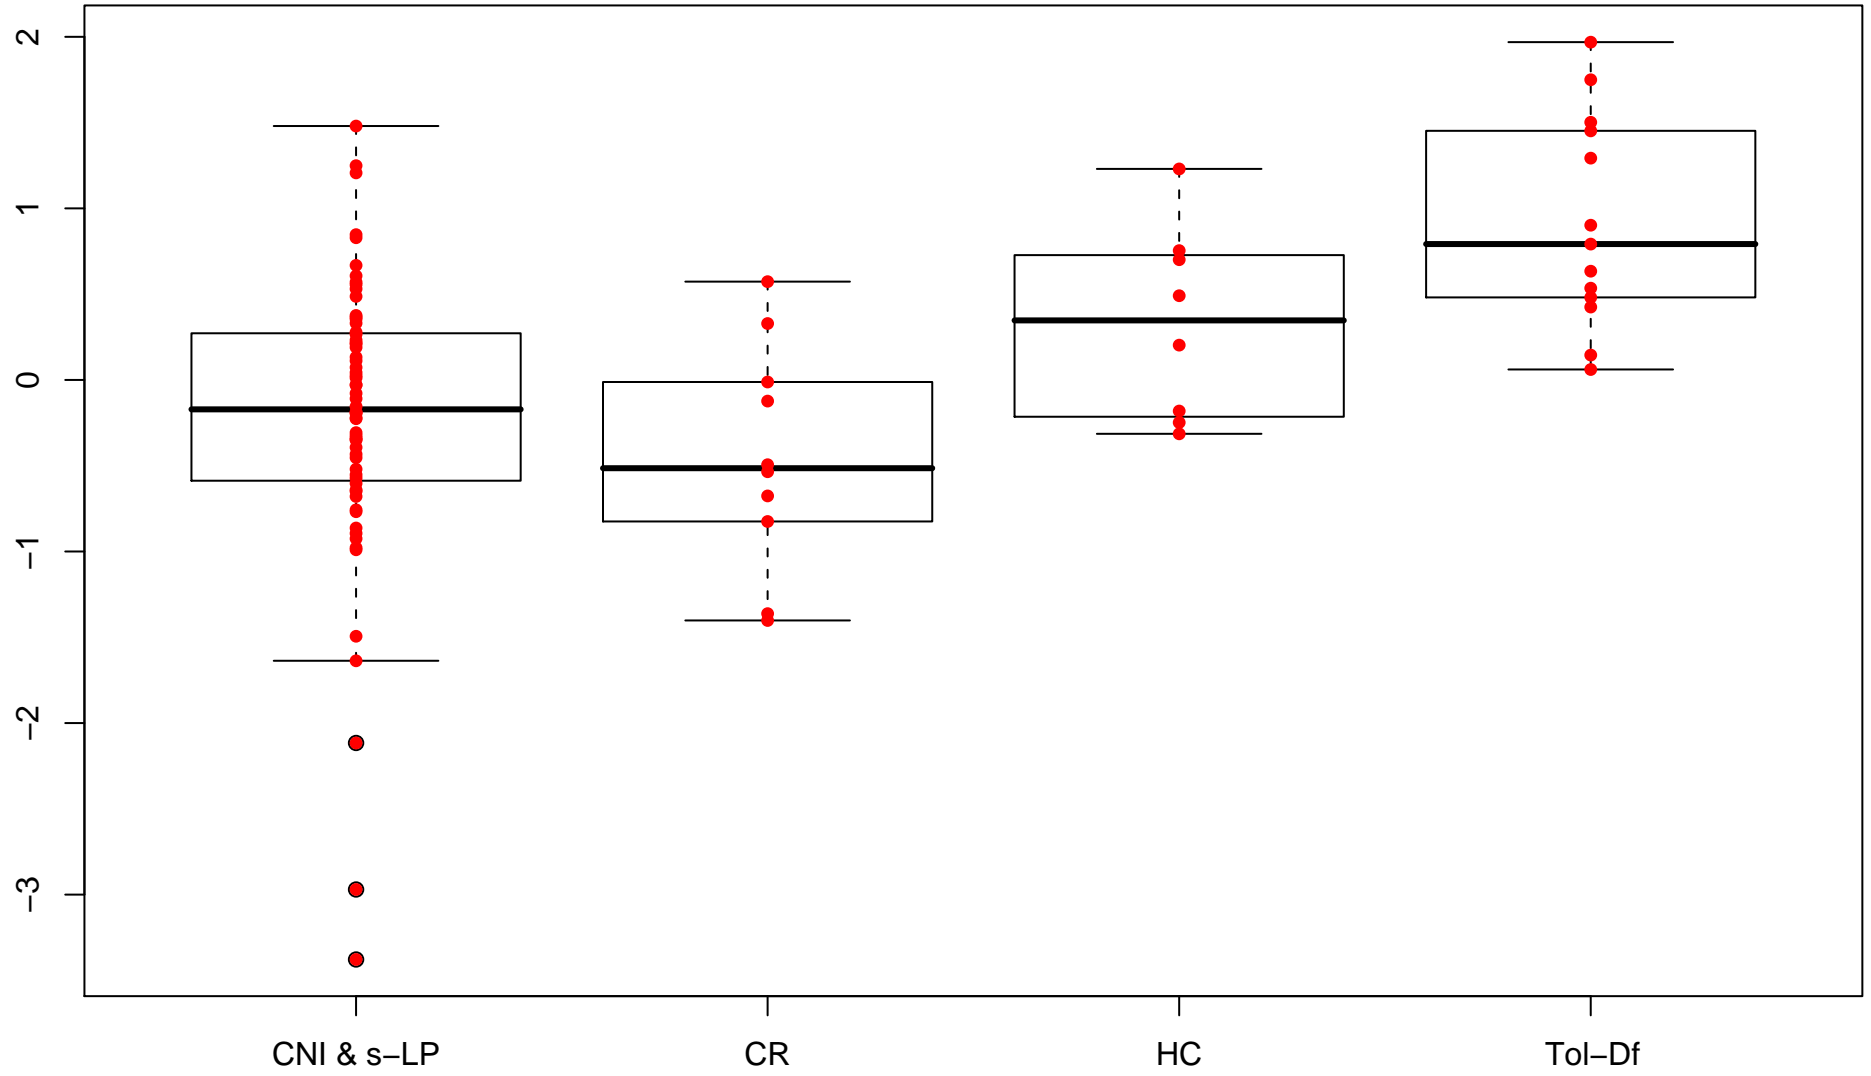

Rank 45 : CD22  
2.1561e-05

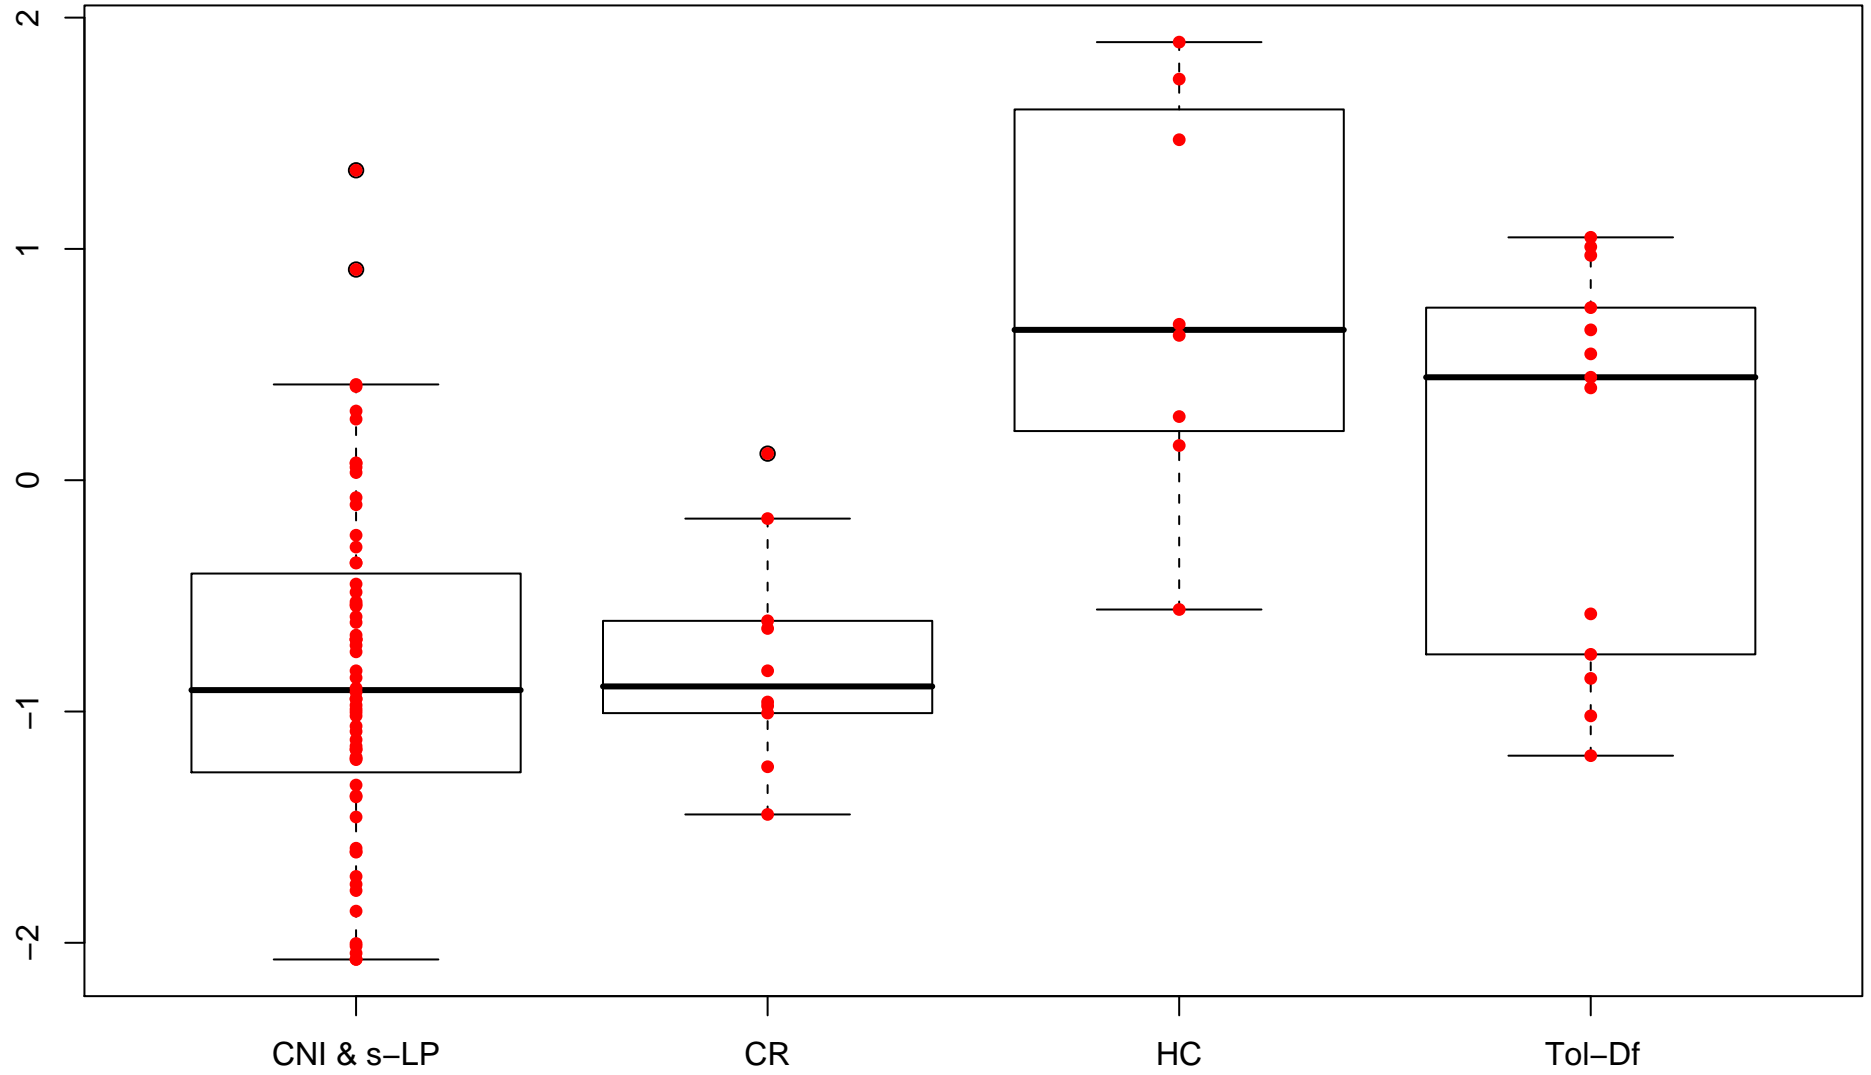

Rank 46 : TLR2  
2.3429e-05

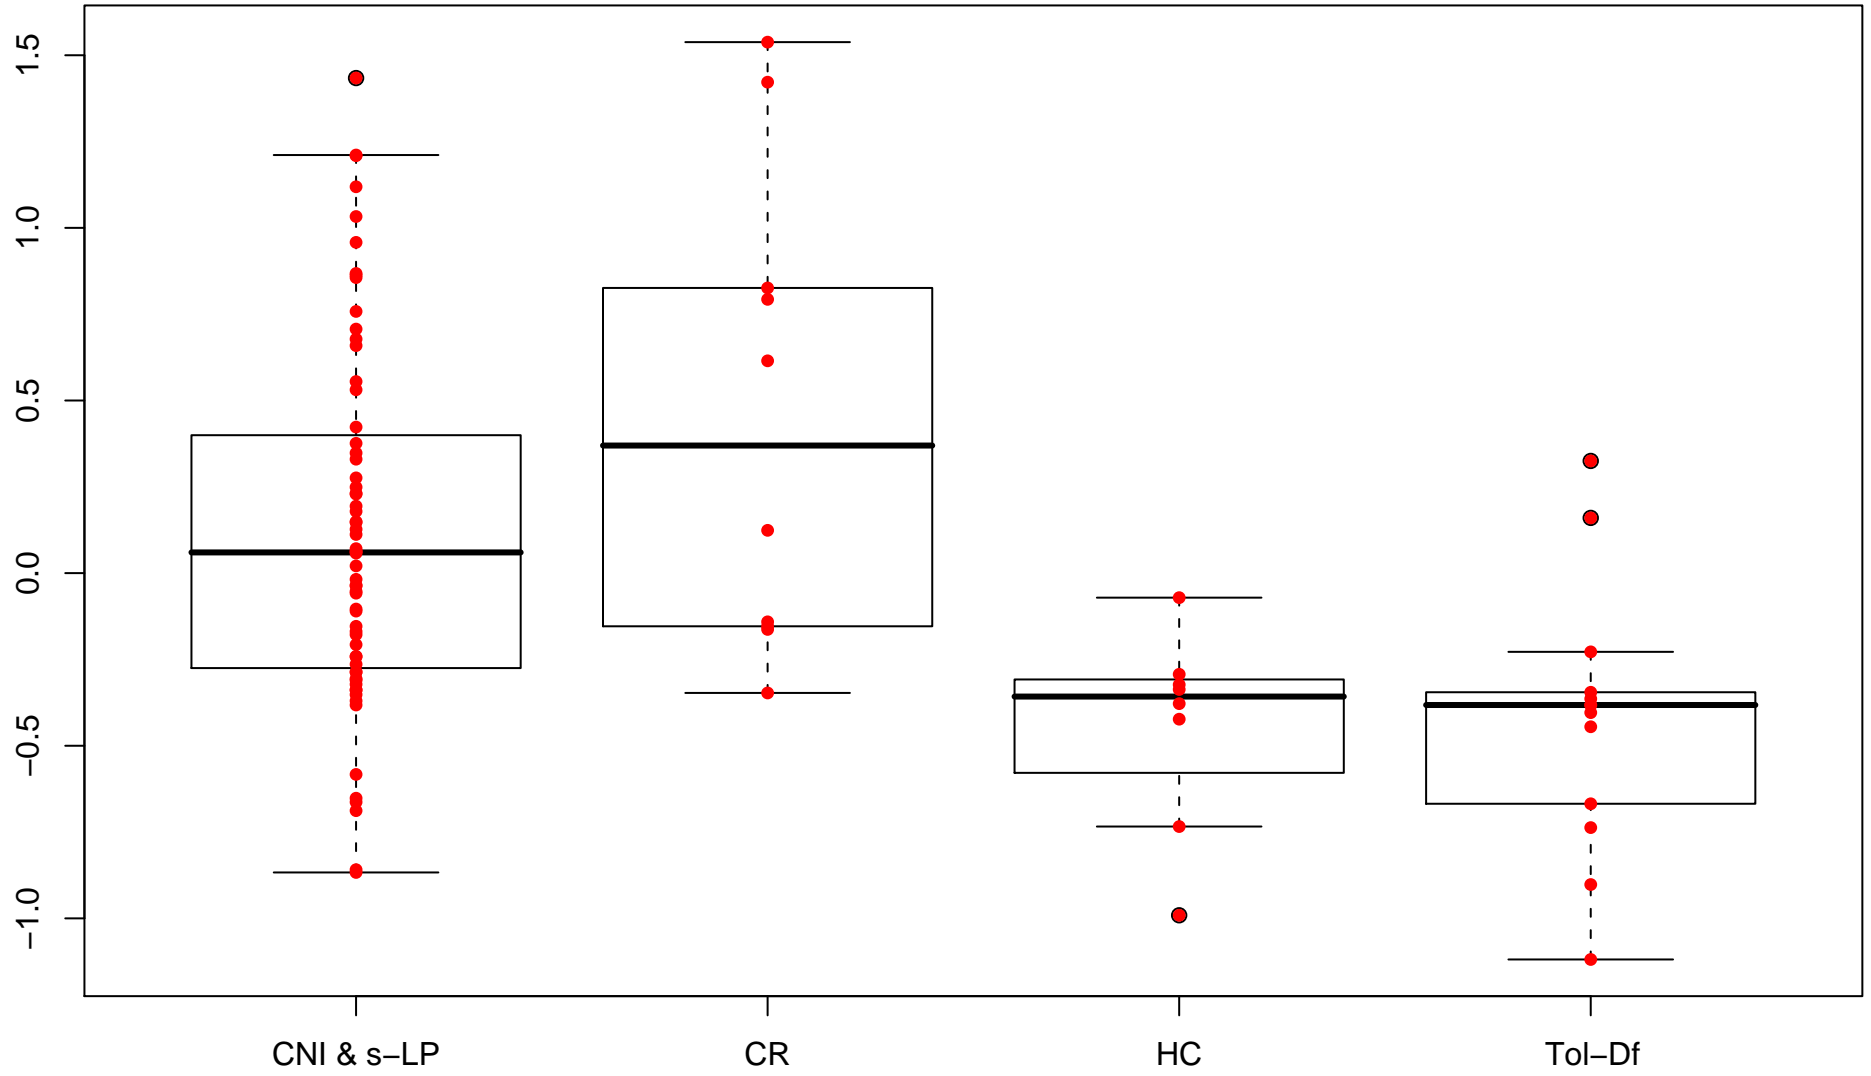

Rank 47 : PLXDC2  
2.5879e-05

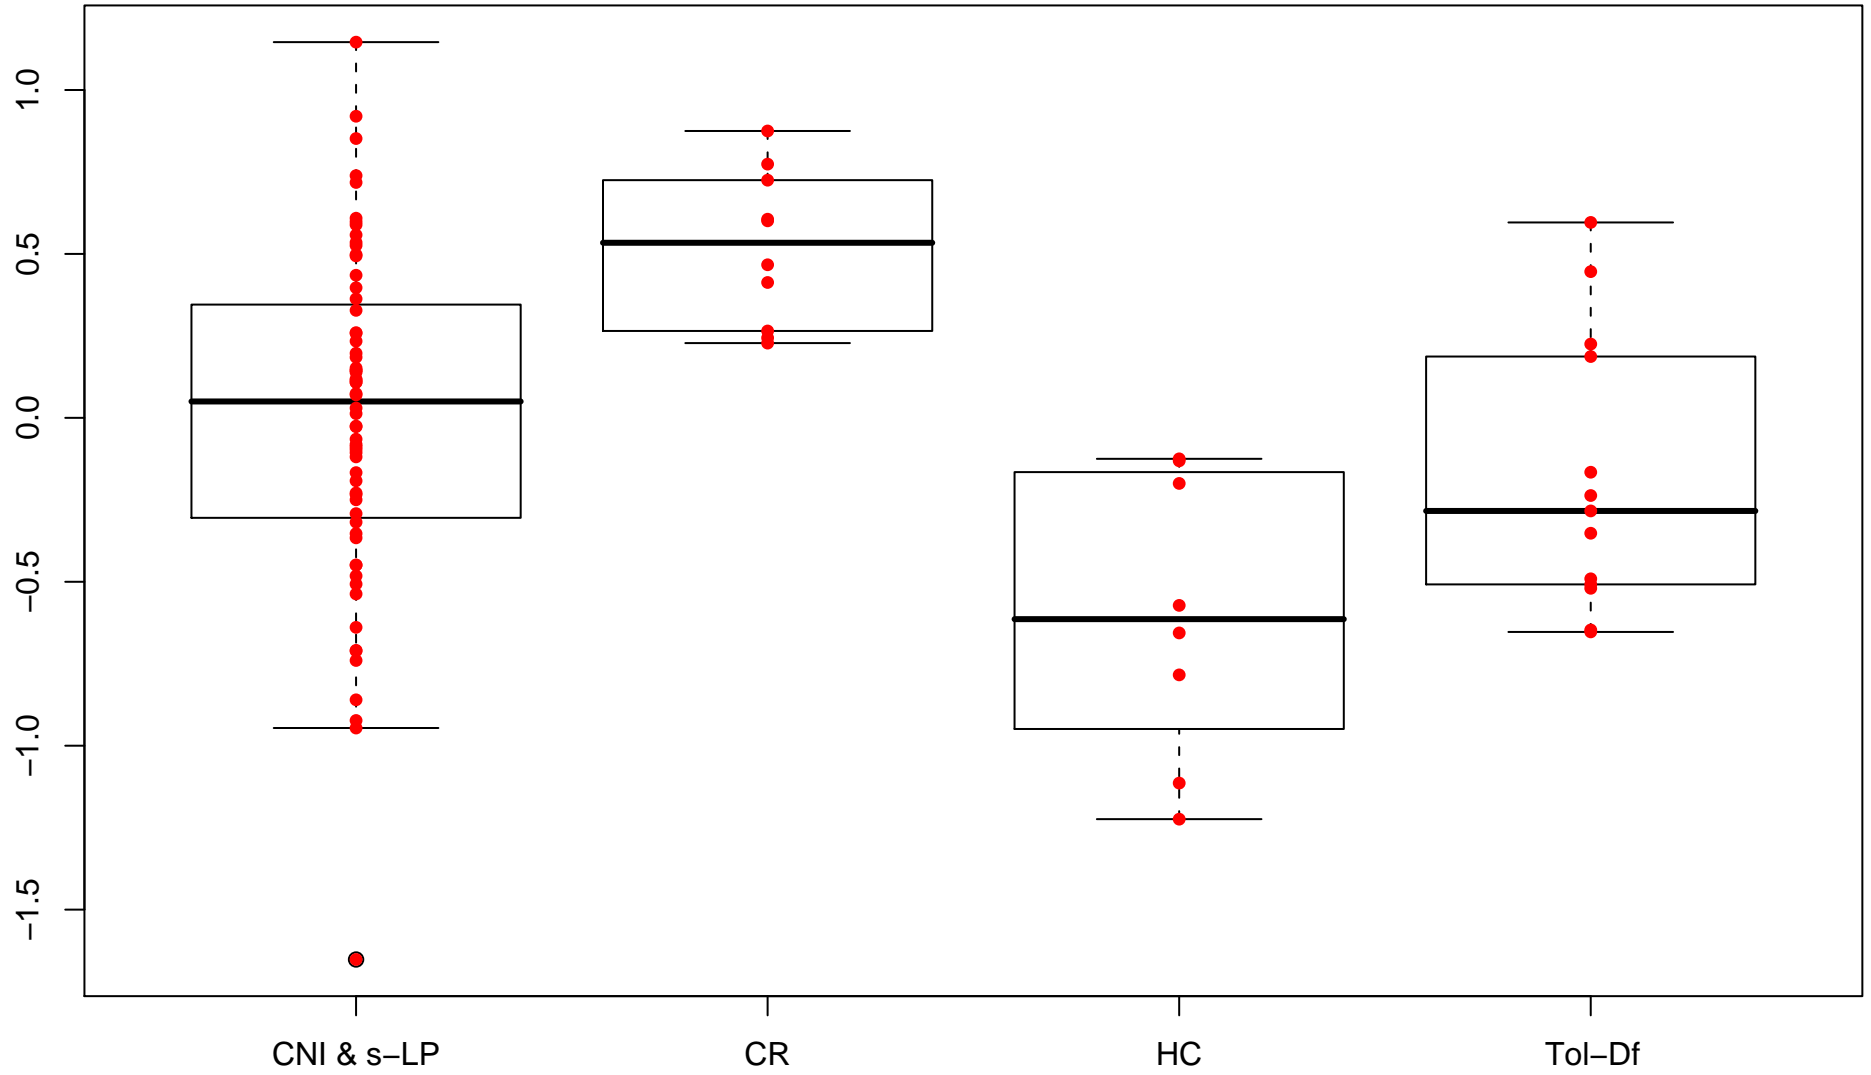

Rank 48 : BCL7A  
2.8508e-05

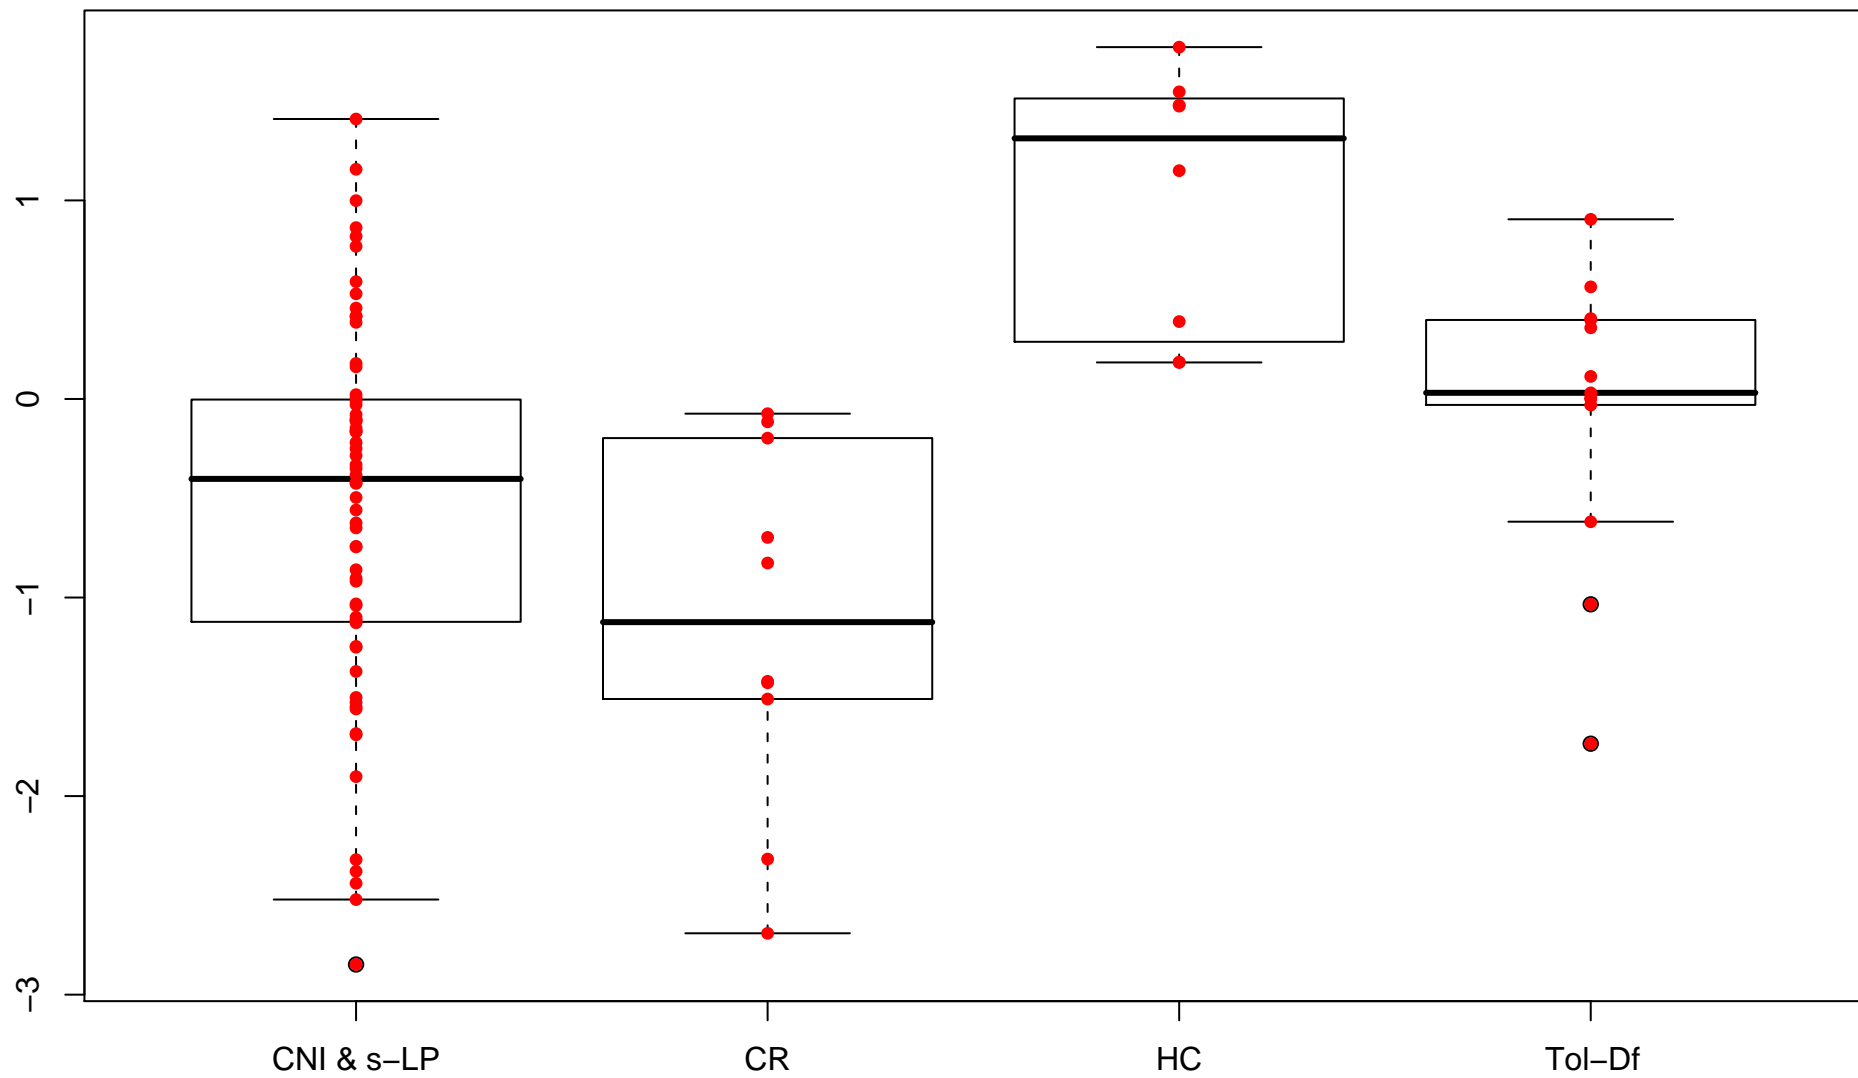

Rank 49 : VMO1  
2.8841e-05

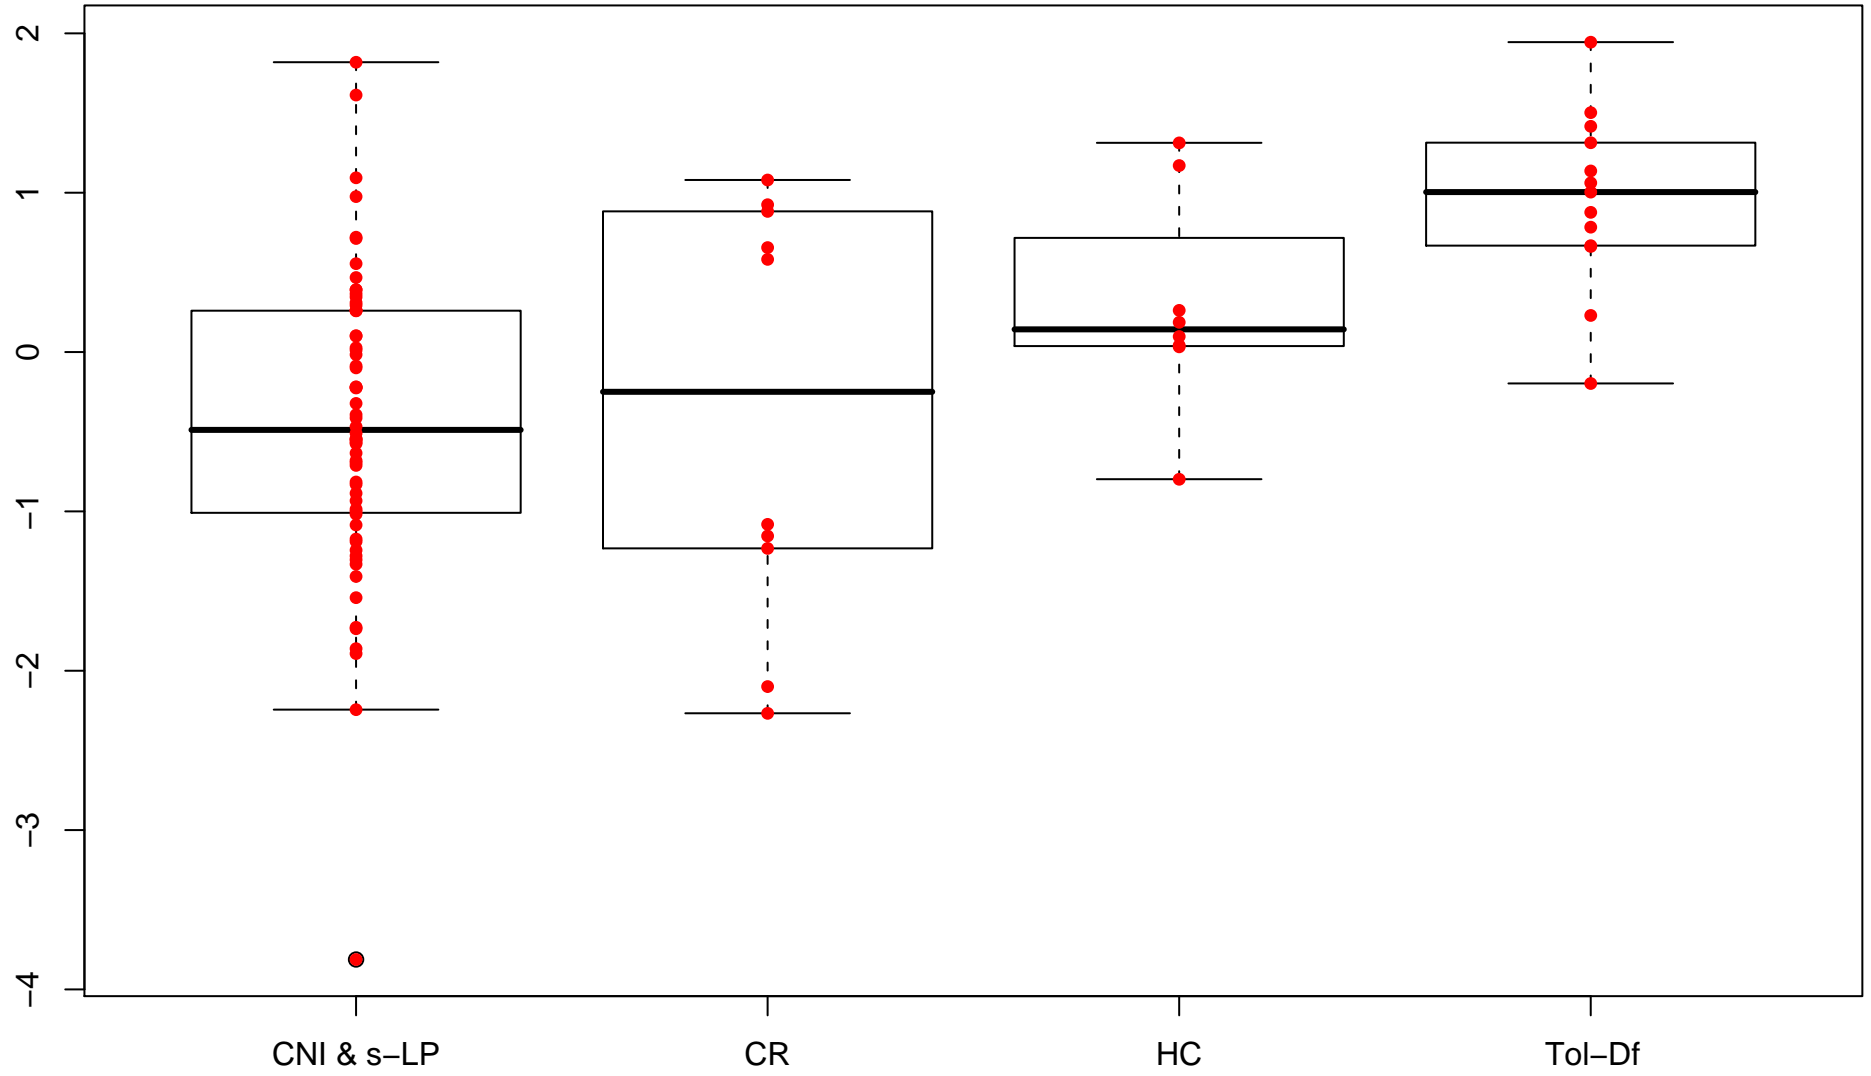

Rank 50 : ADAMTS4  
2.972e-05

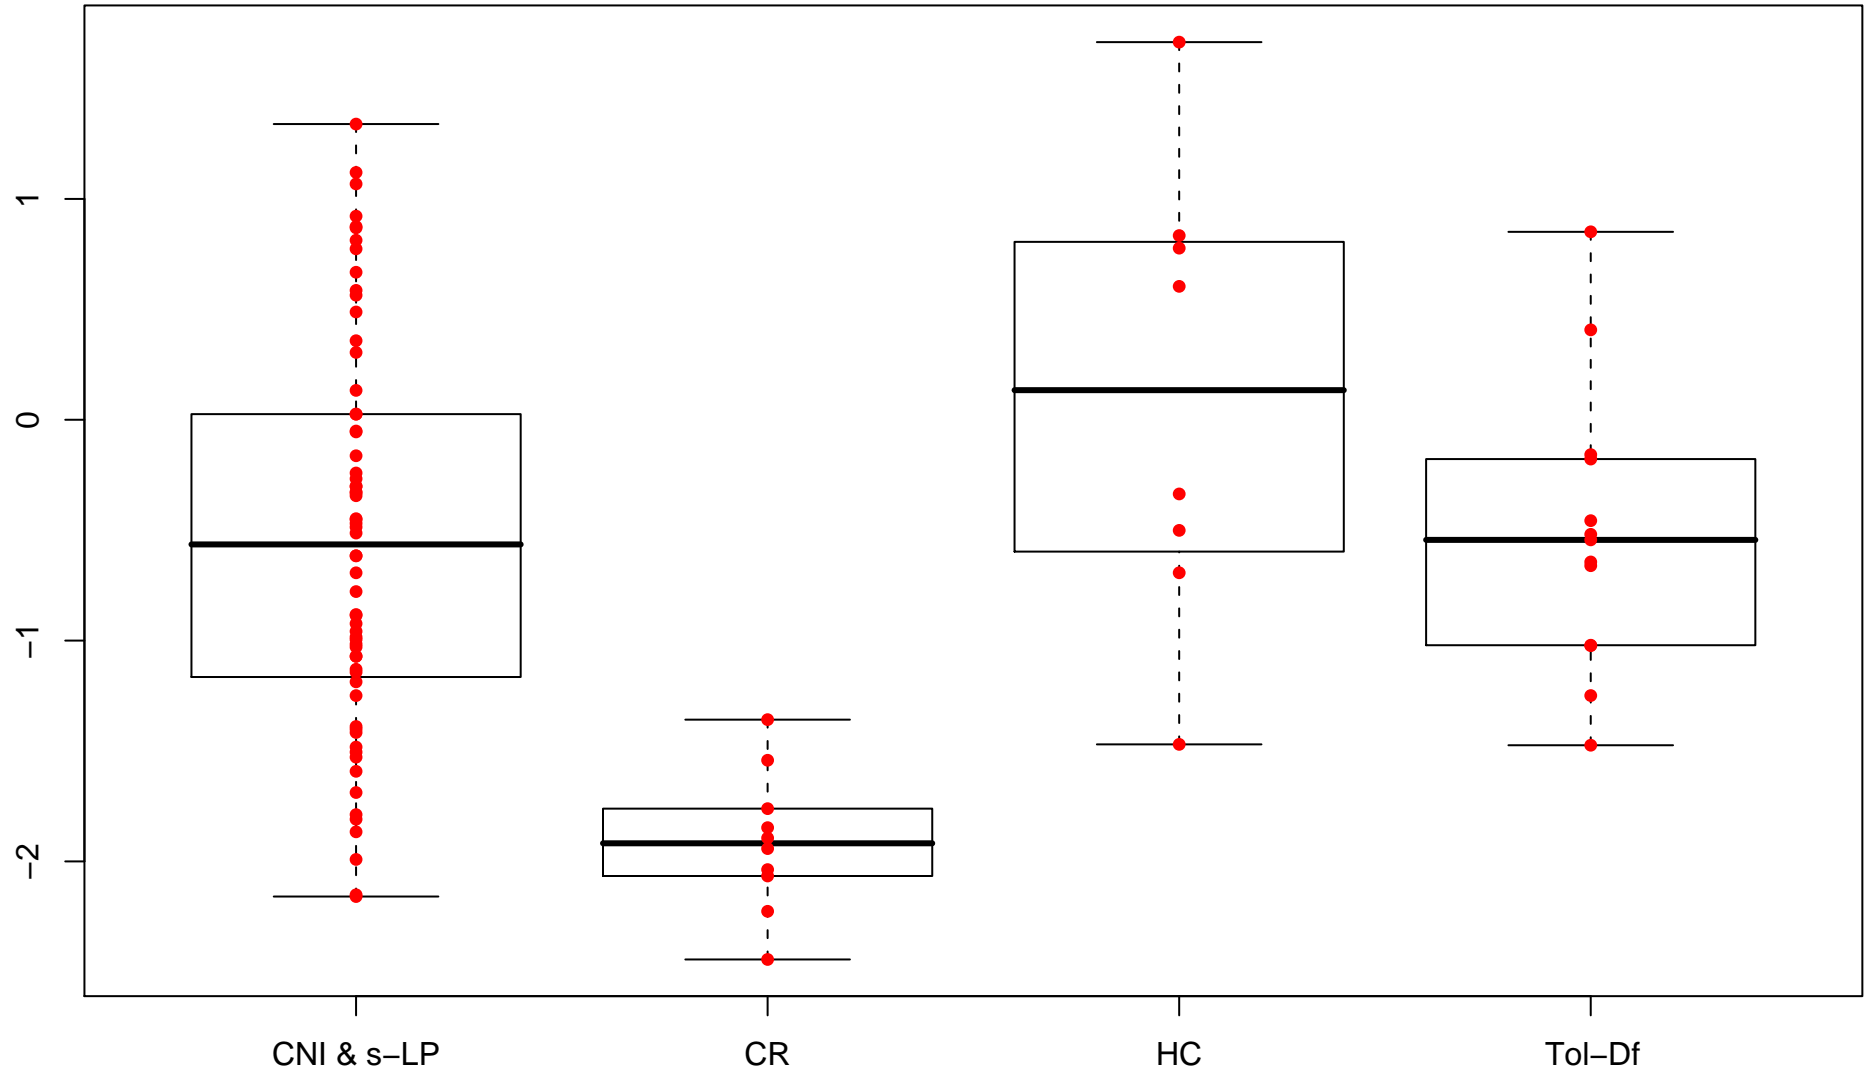



Rank 51 : PTPRJ  
3.0936e-05

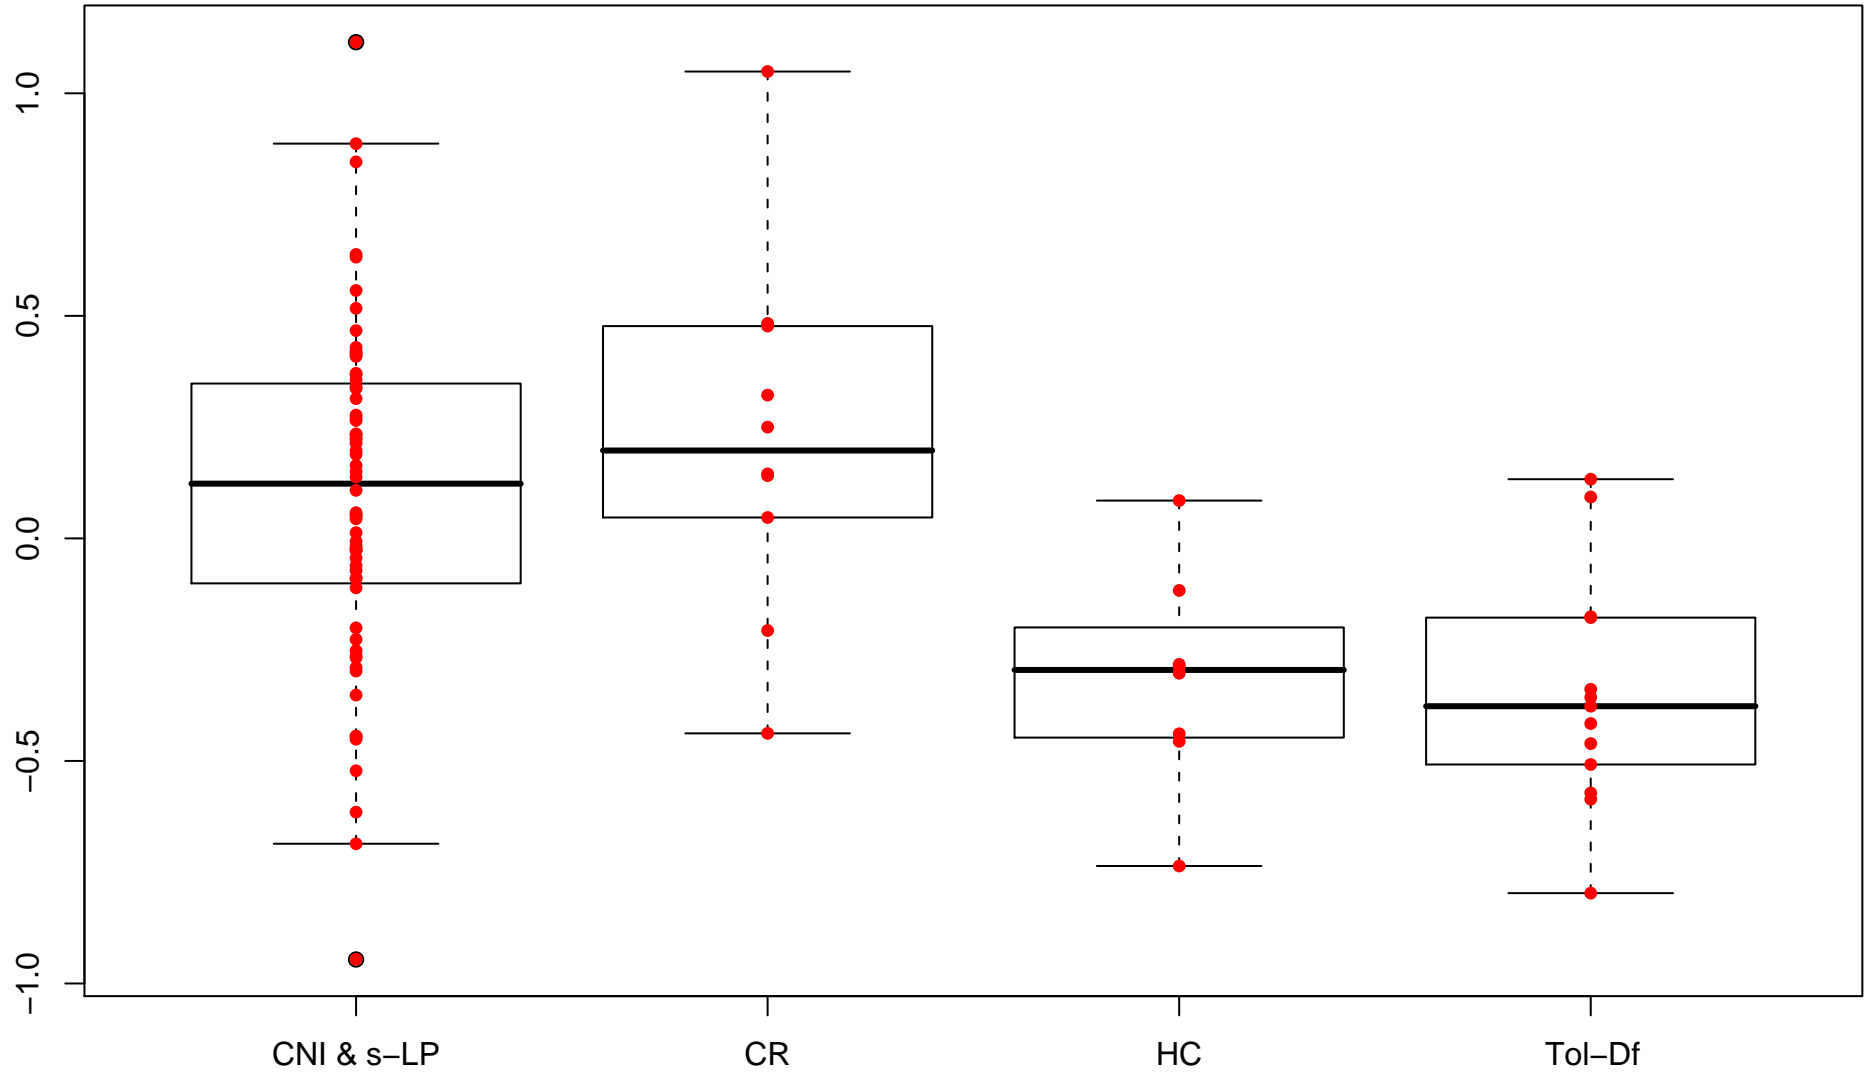

Rank 52 : IFNAR1  
3.1601e-05

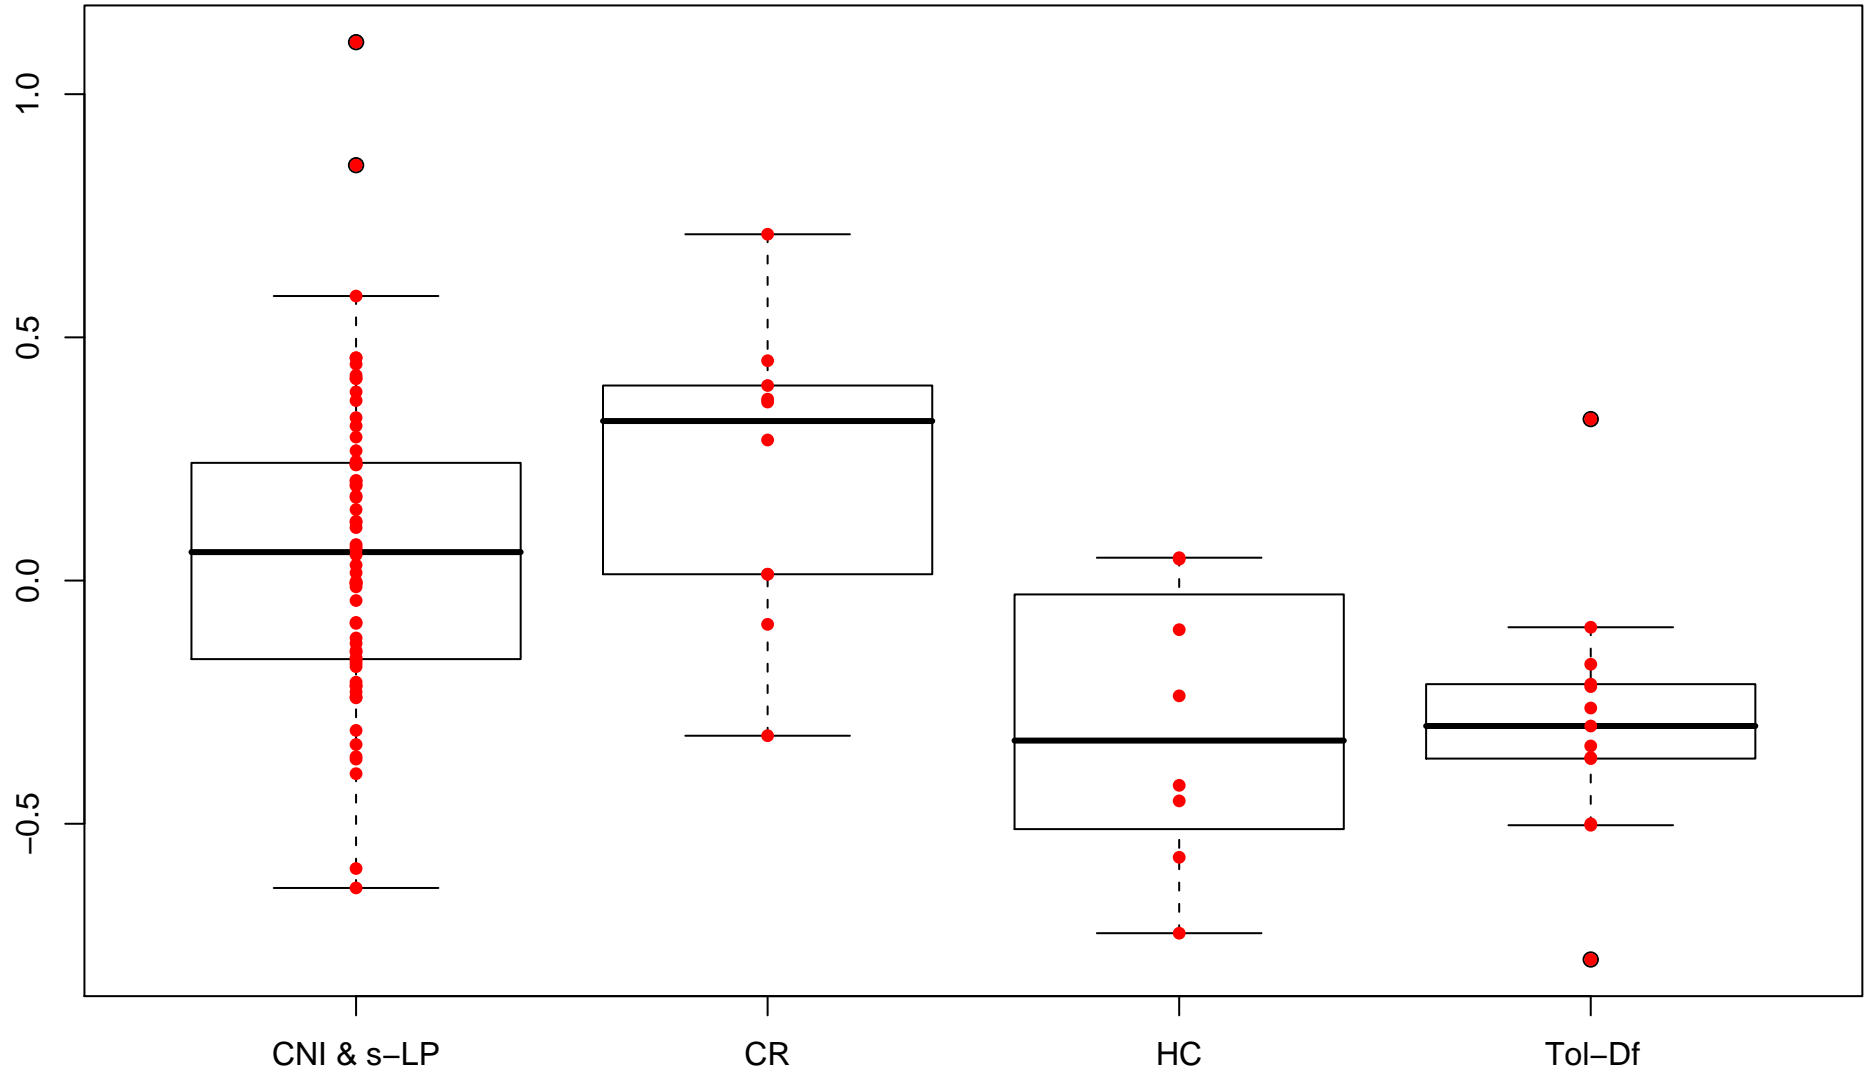

Rank 53 : MAGEA10  
3.2e-05

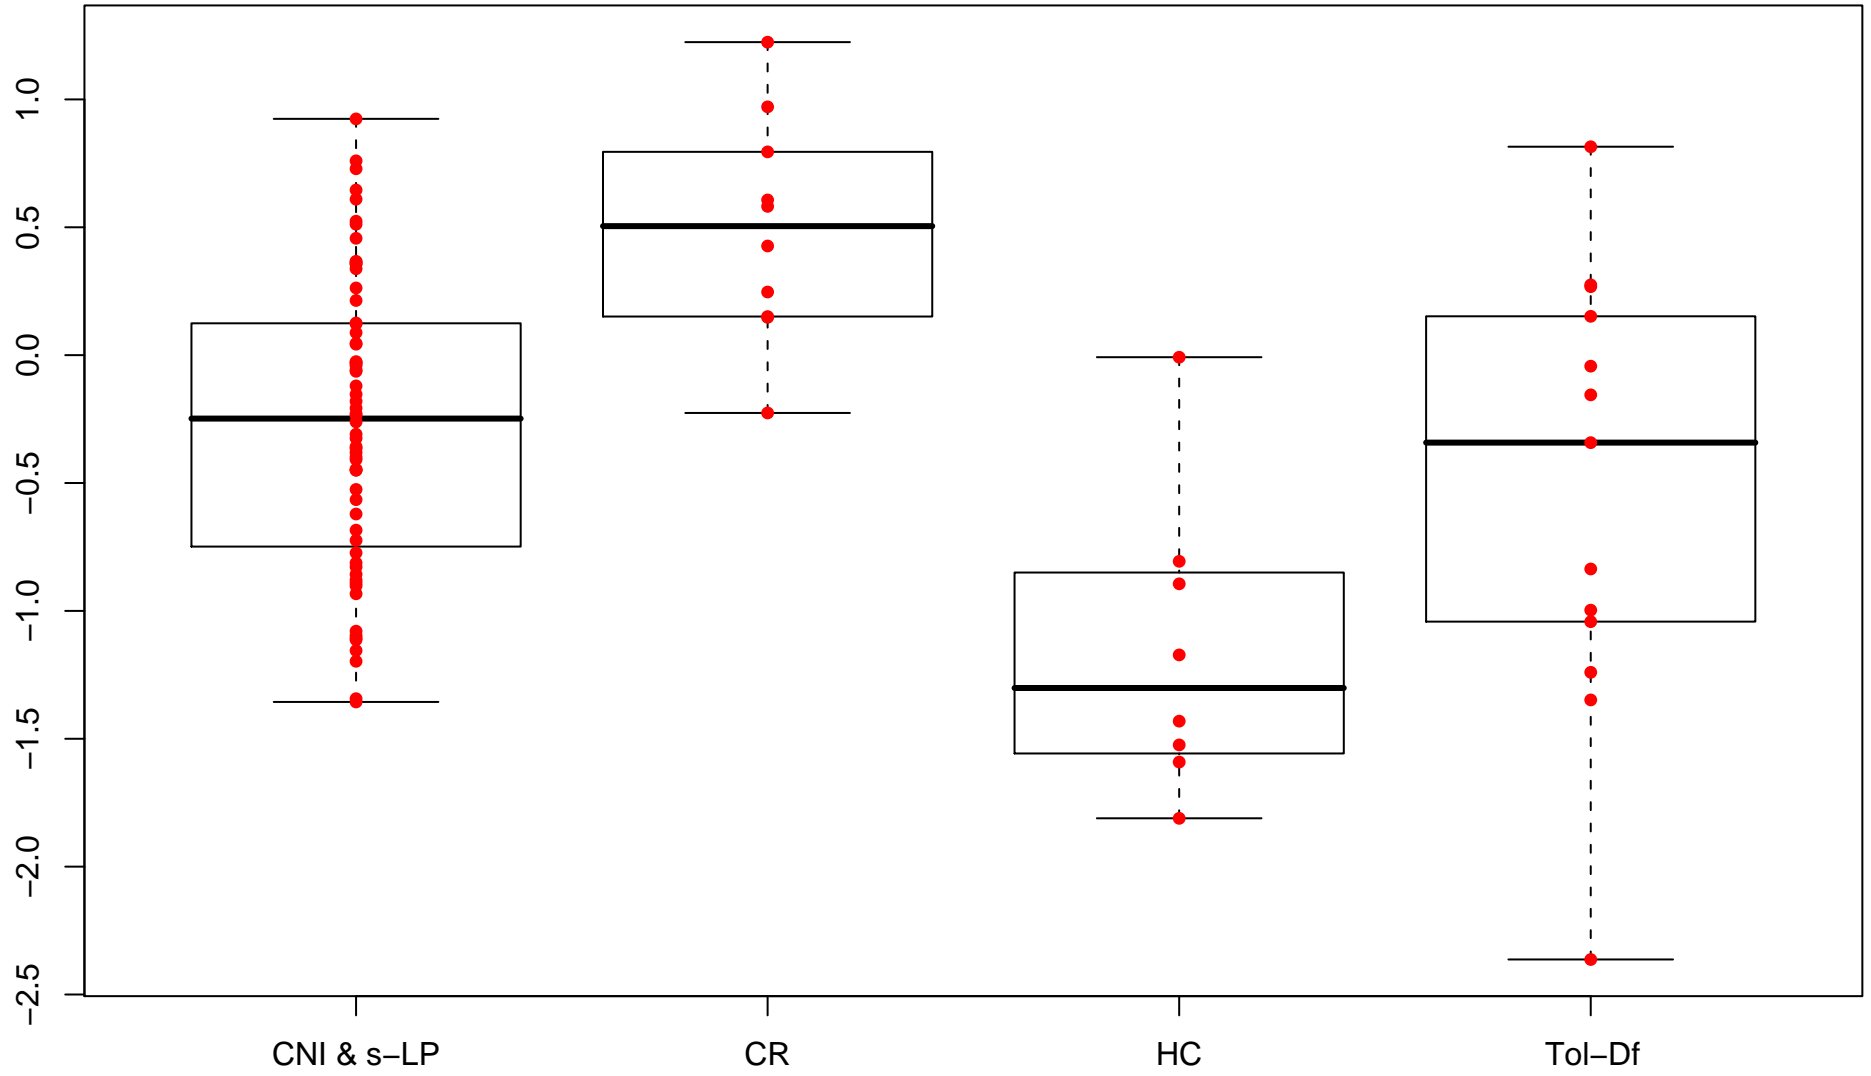

Rank 54 : HLA-DOB  
3.363e-05

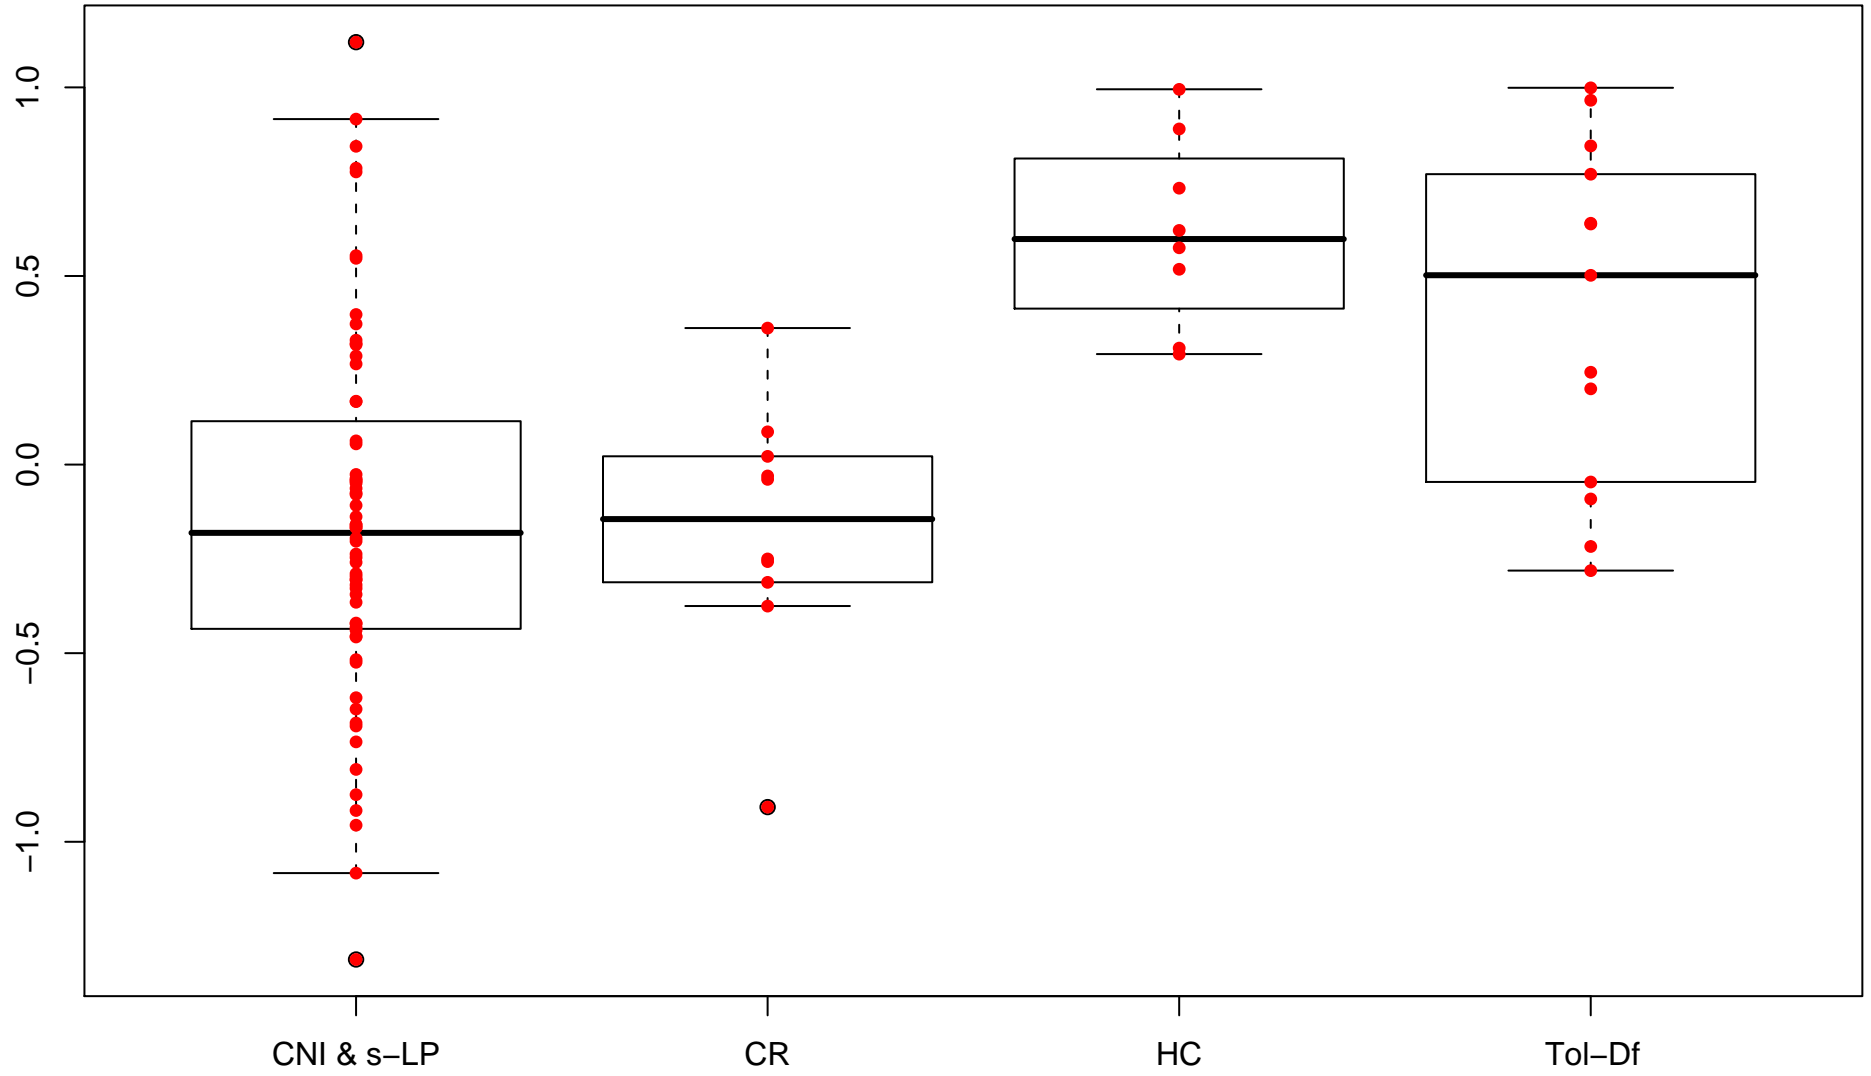

Rank 55 : CD163  
3.507e-05

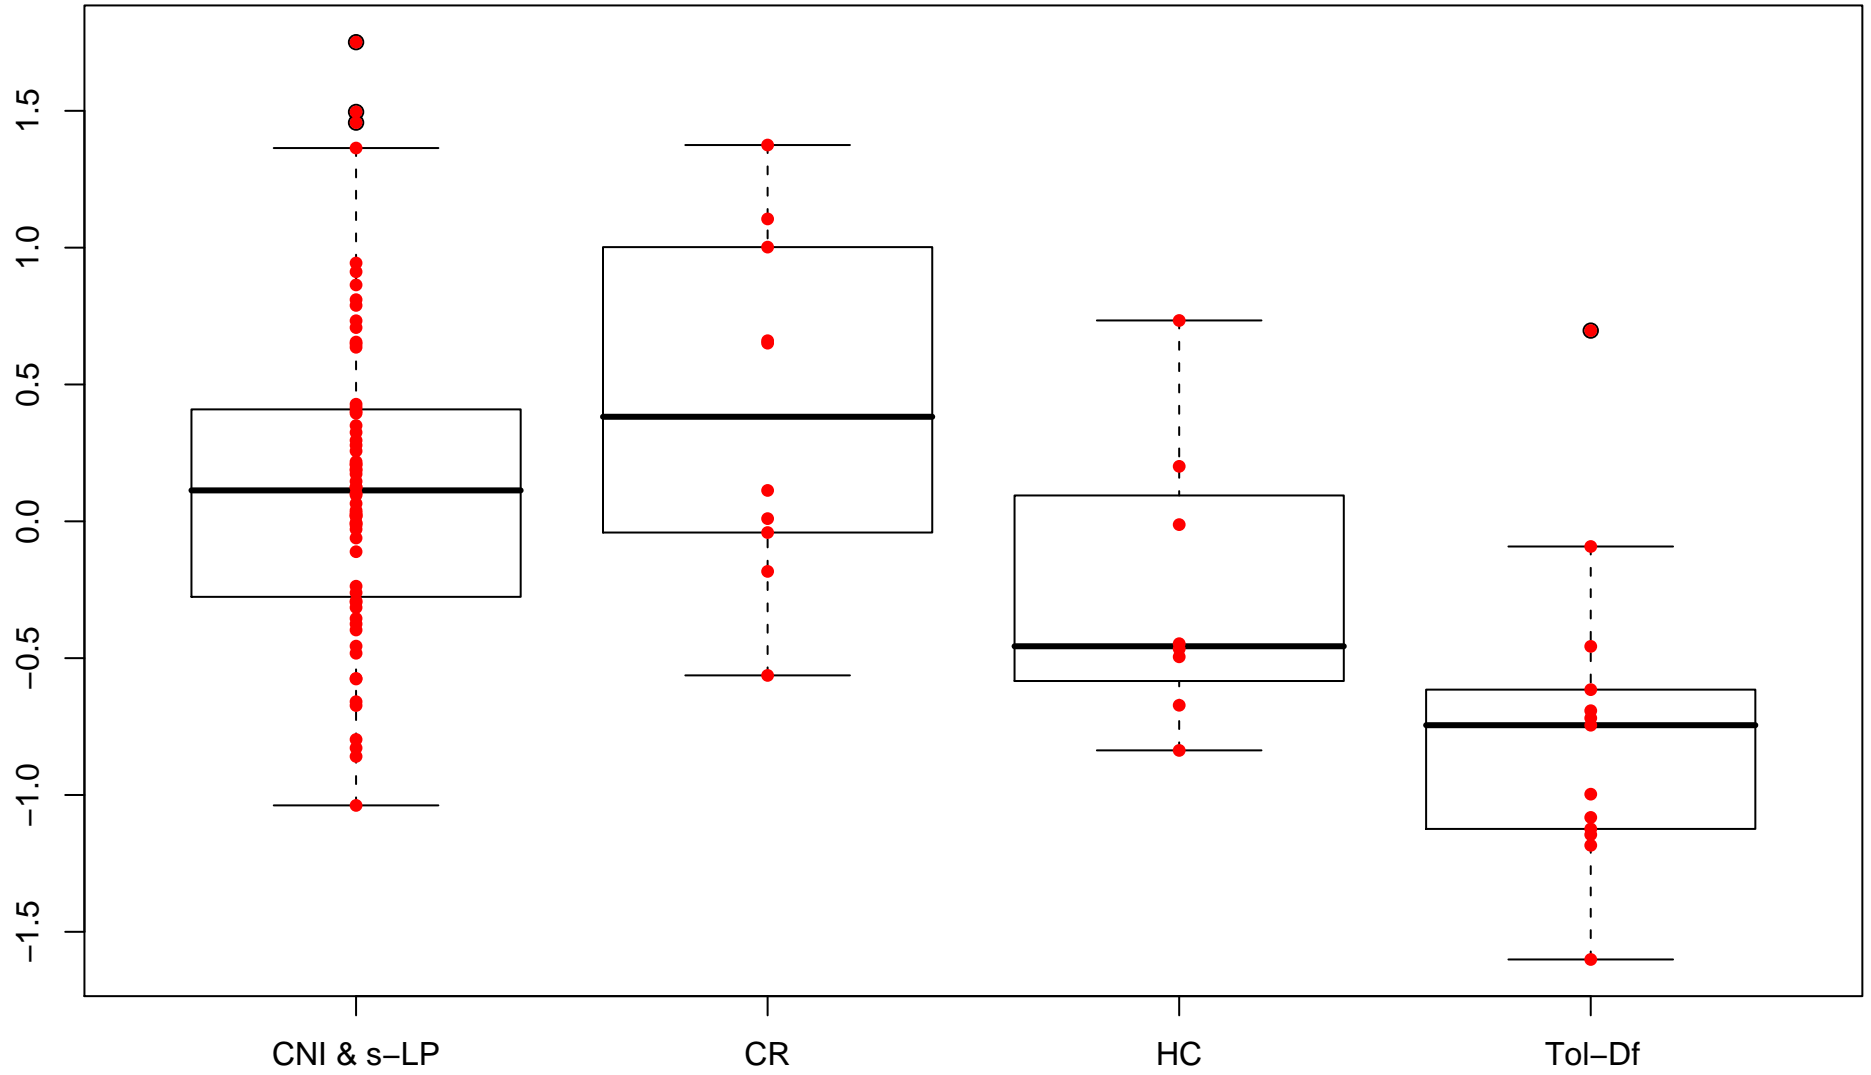

Rank 56 : FLJ32866  
3.698e-05

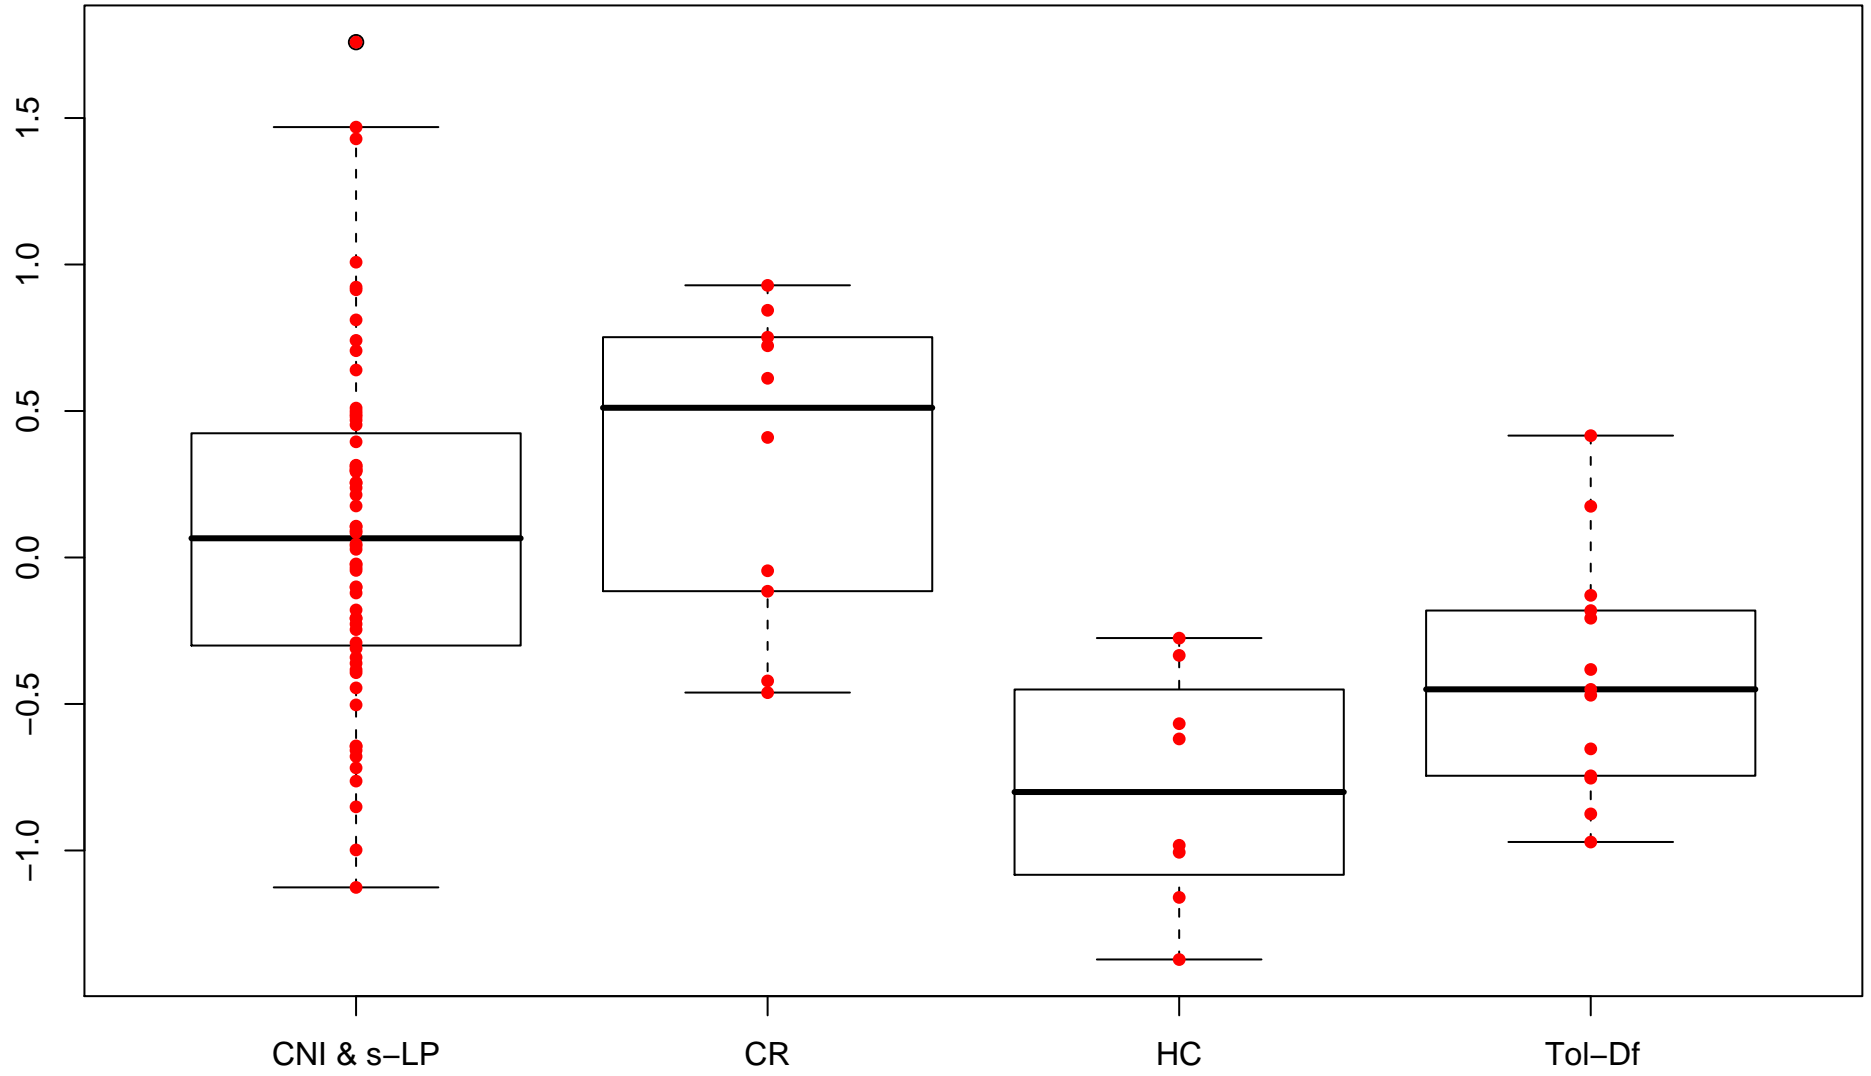

Rank 57 : EBF1  
3.855e-05

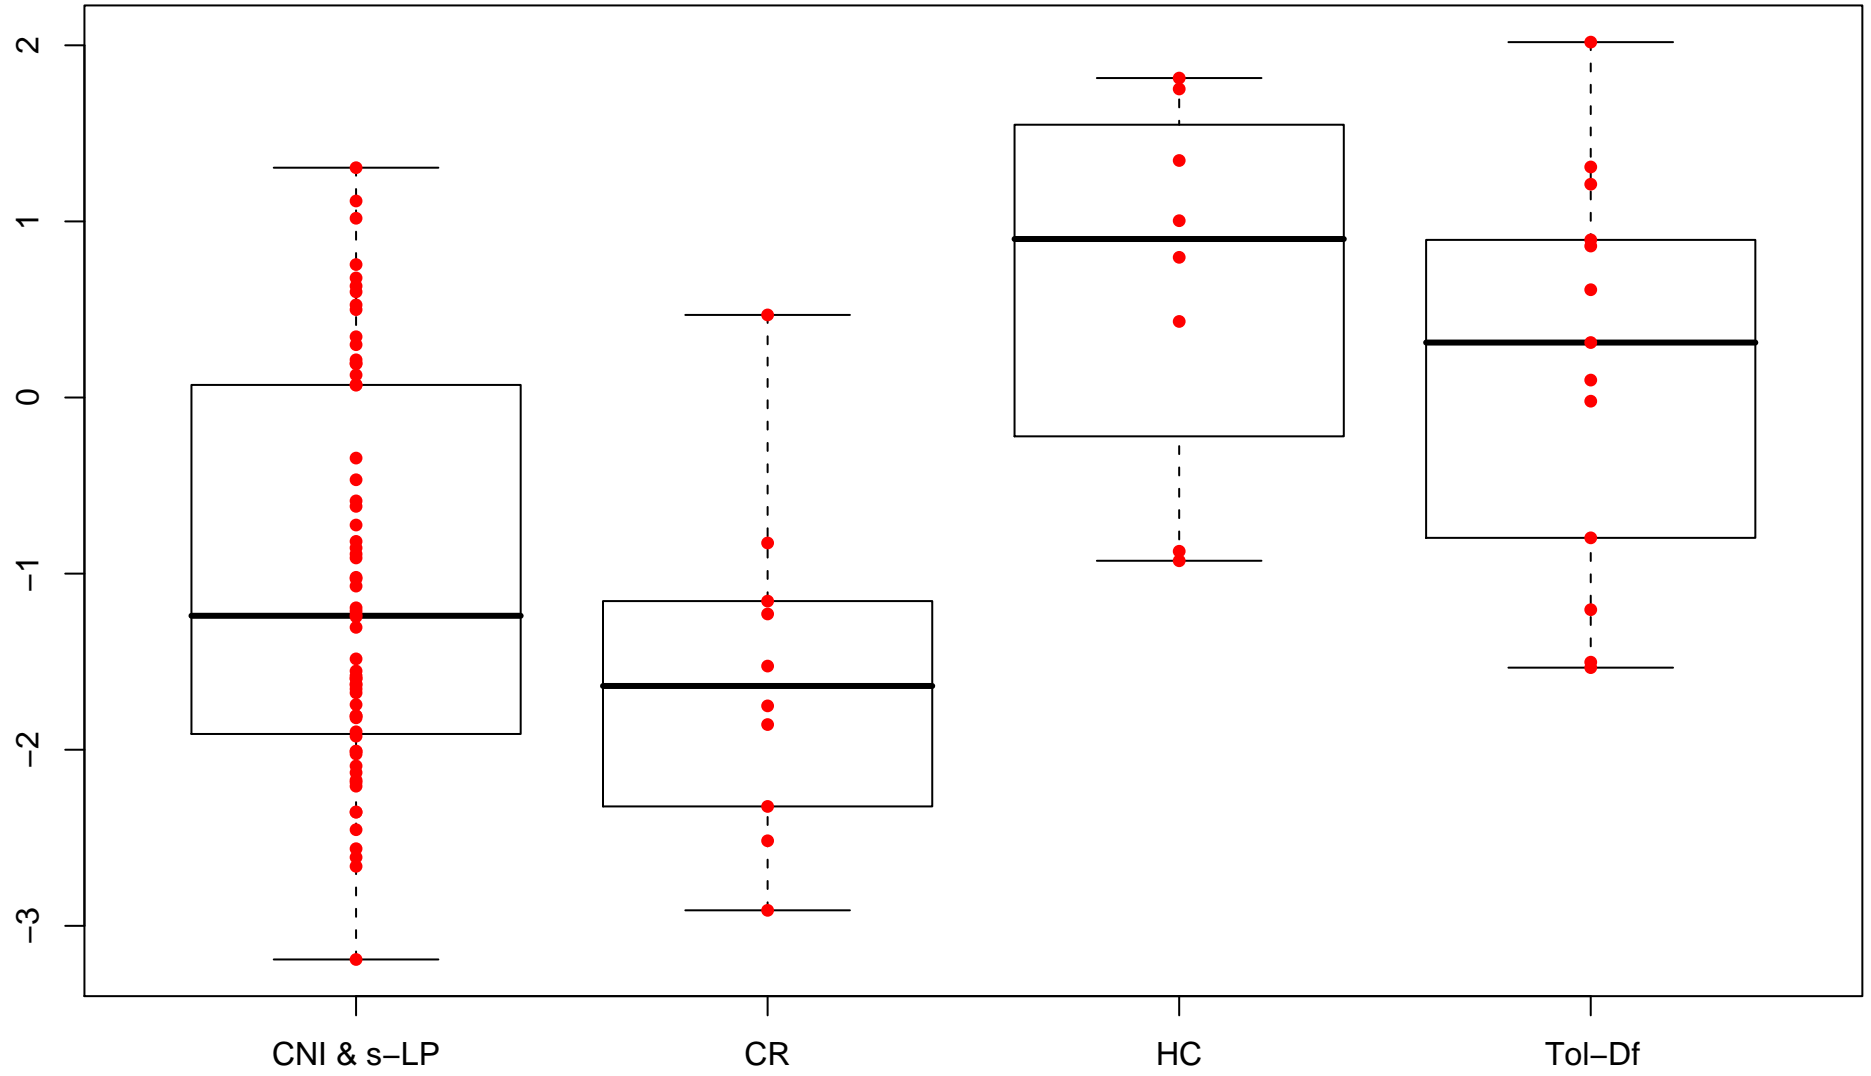

Rank 58 : GPR92  
4.112e-05

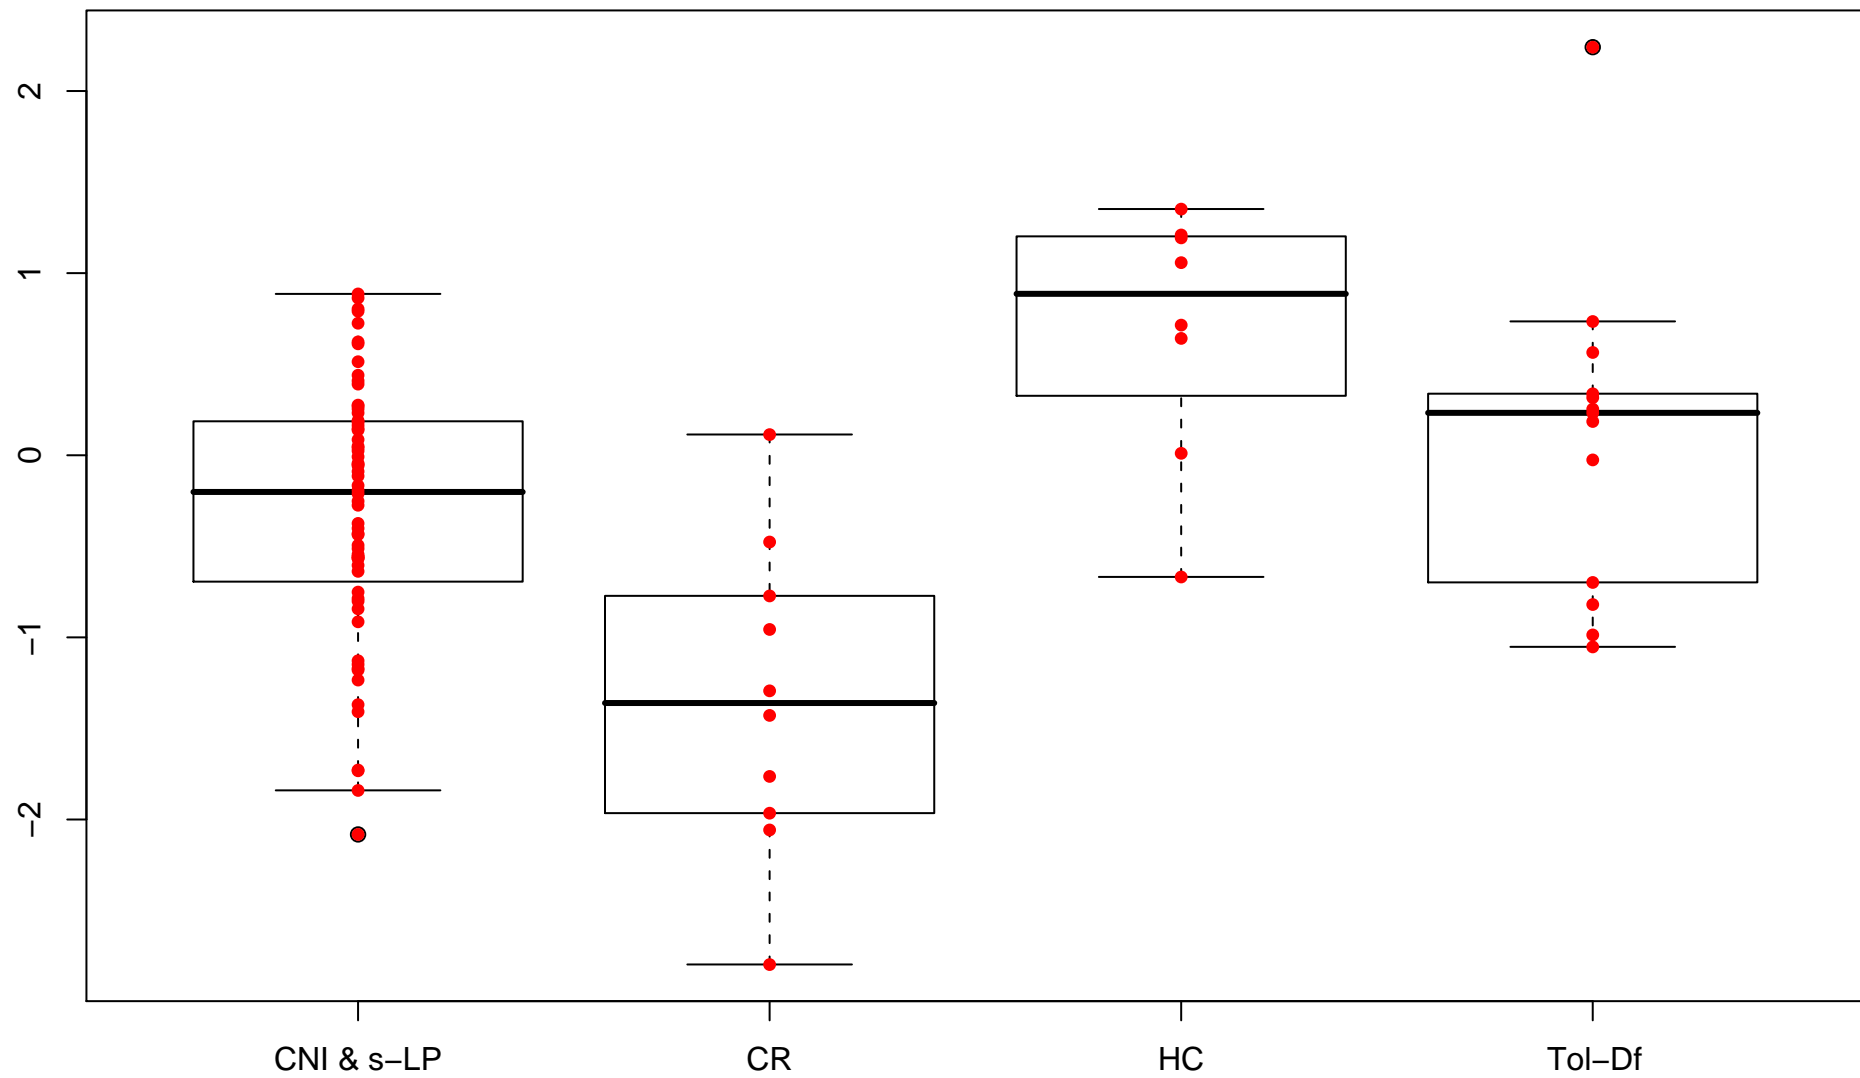



Rank 59 : COX11  
4.197e-05

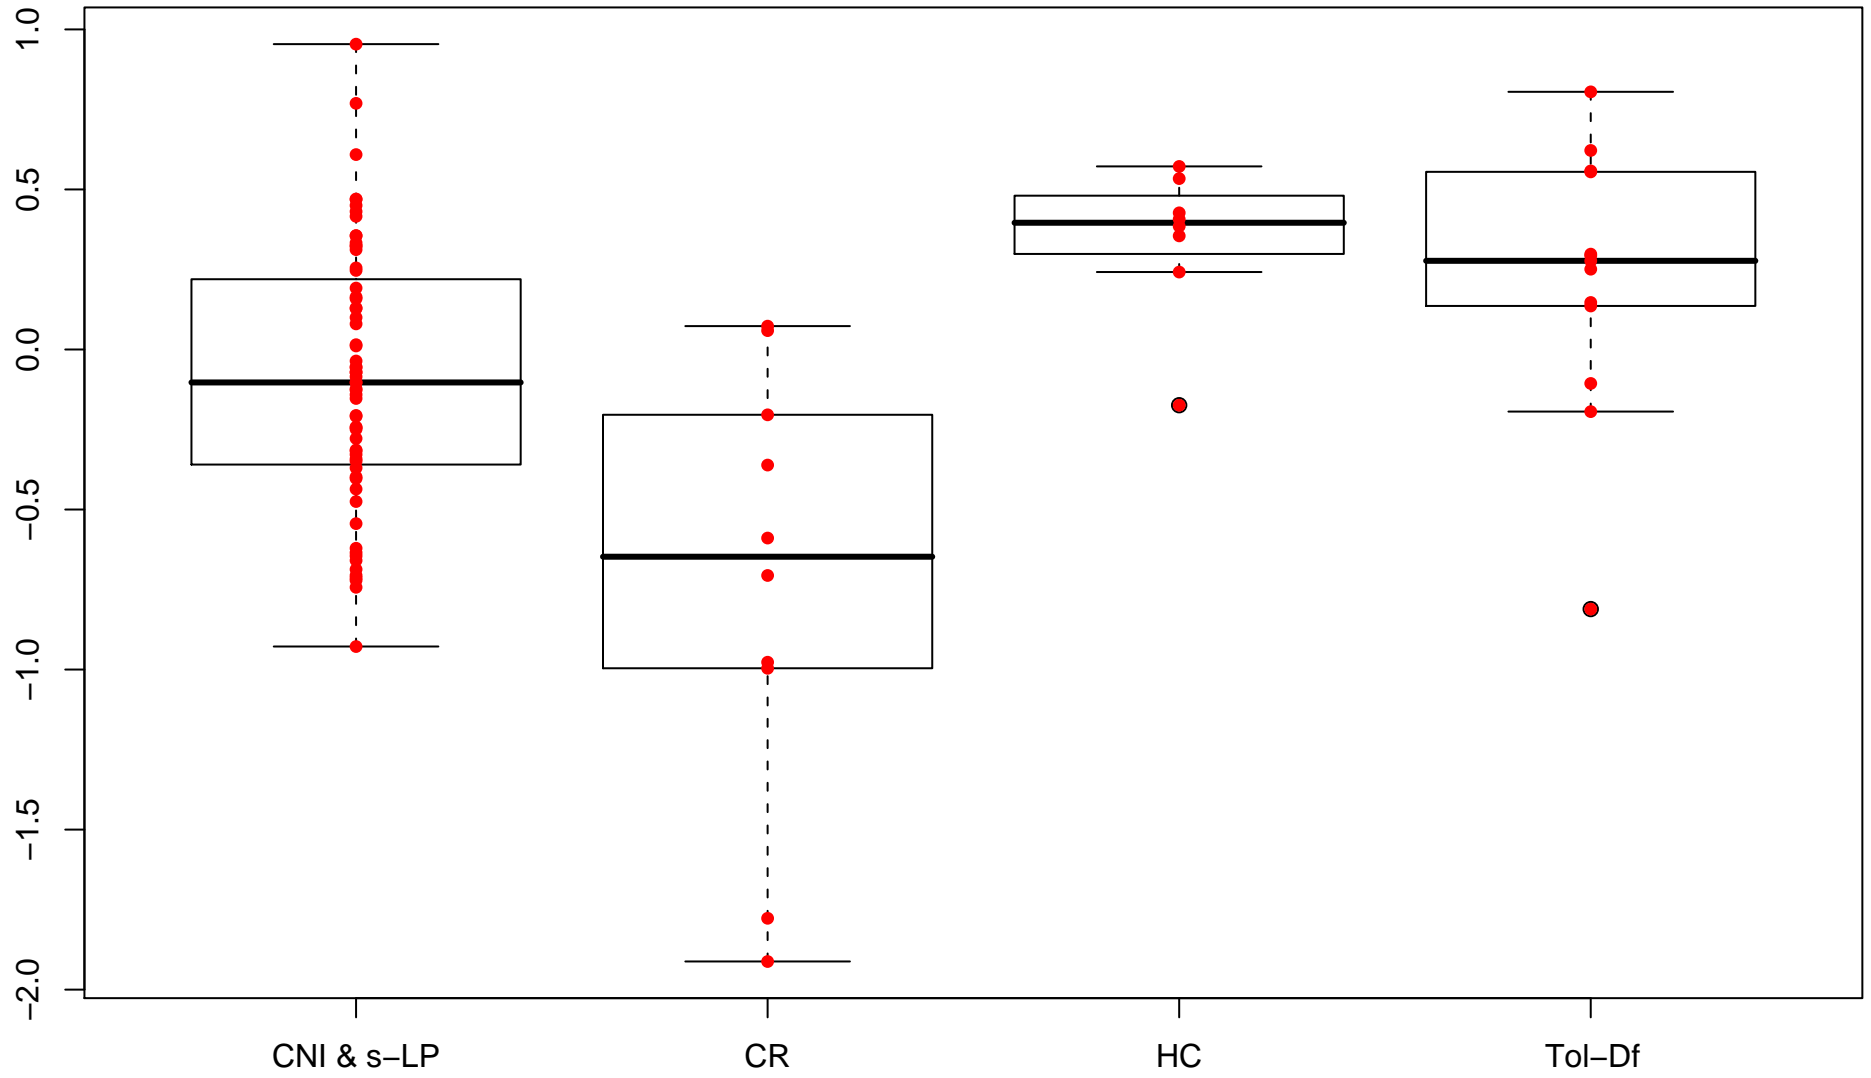

Rank 60 : PEX3  
4.219e-05

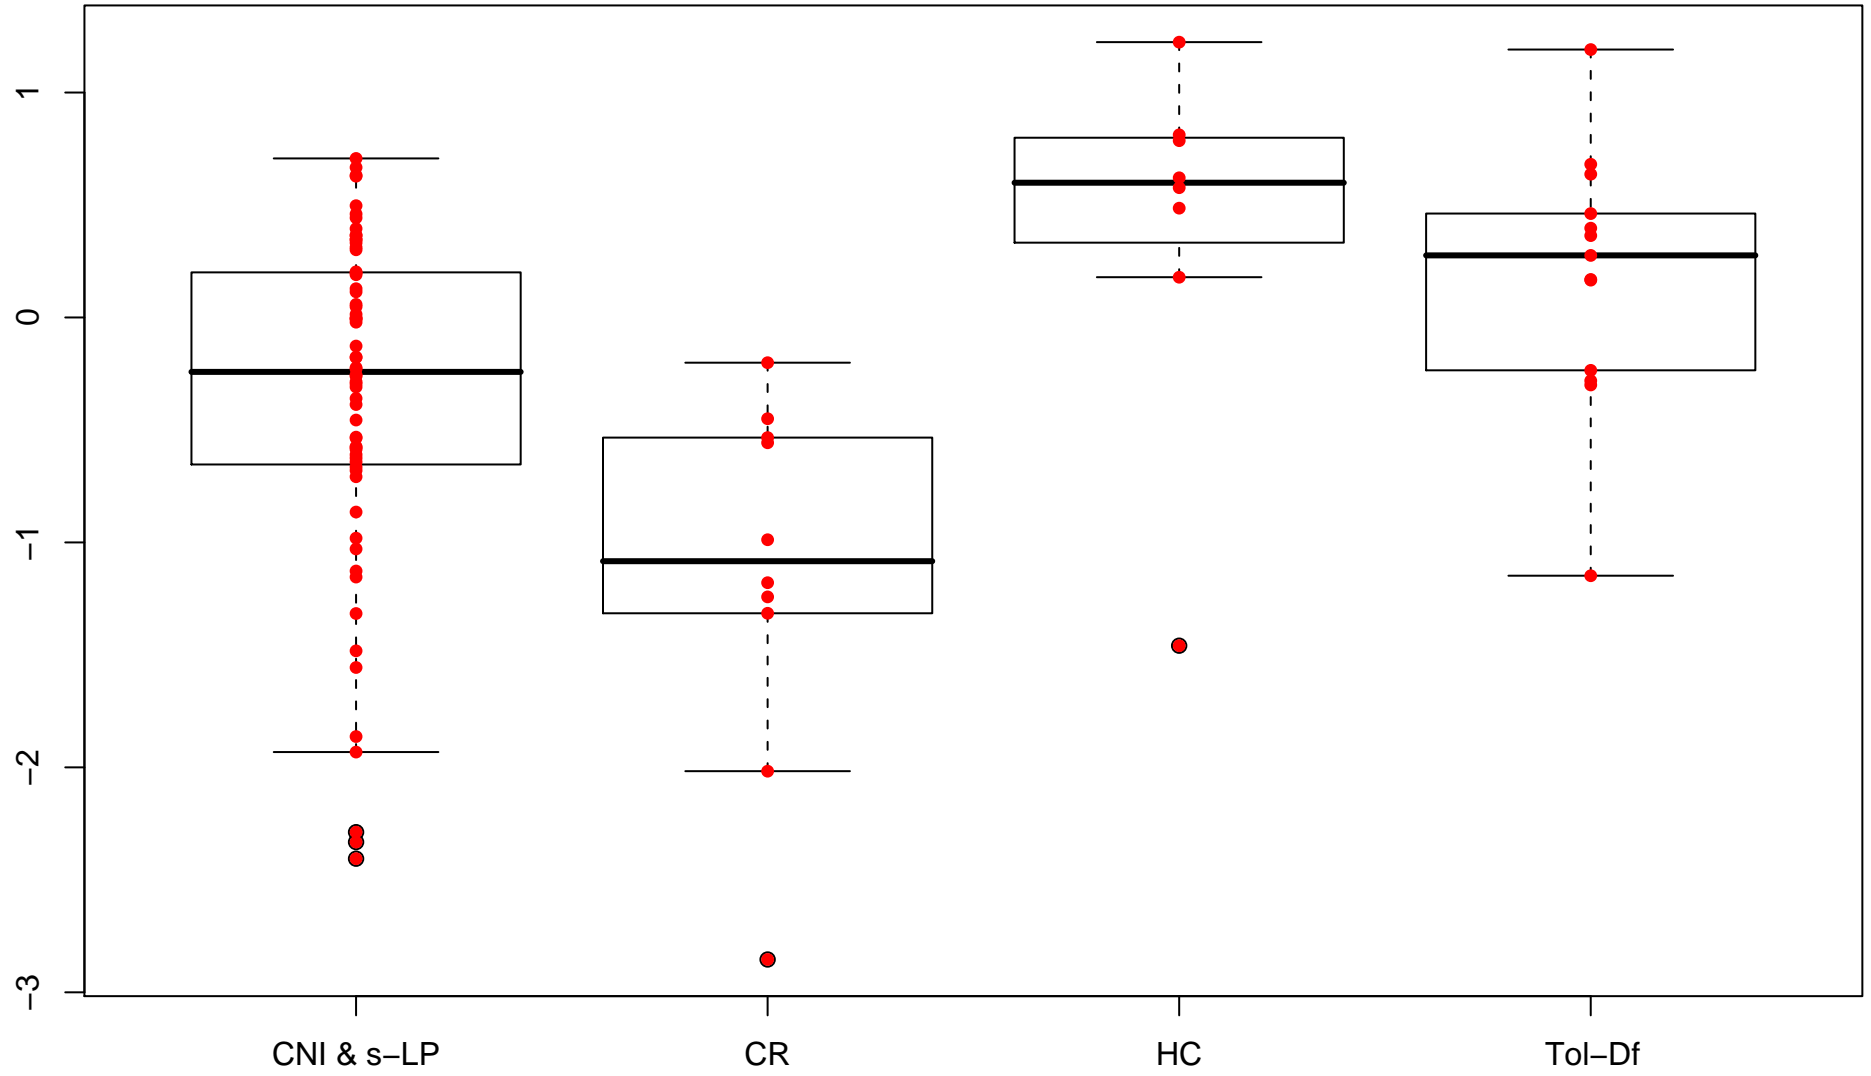

Rank 61 : ACVR1  
4.264e-05

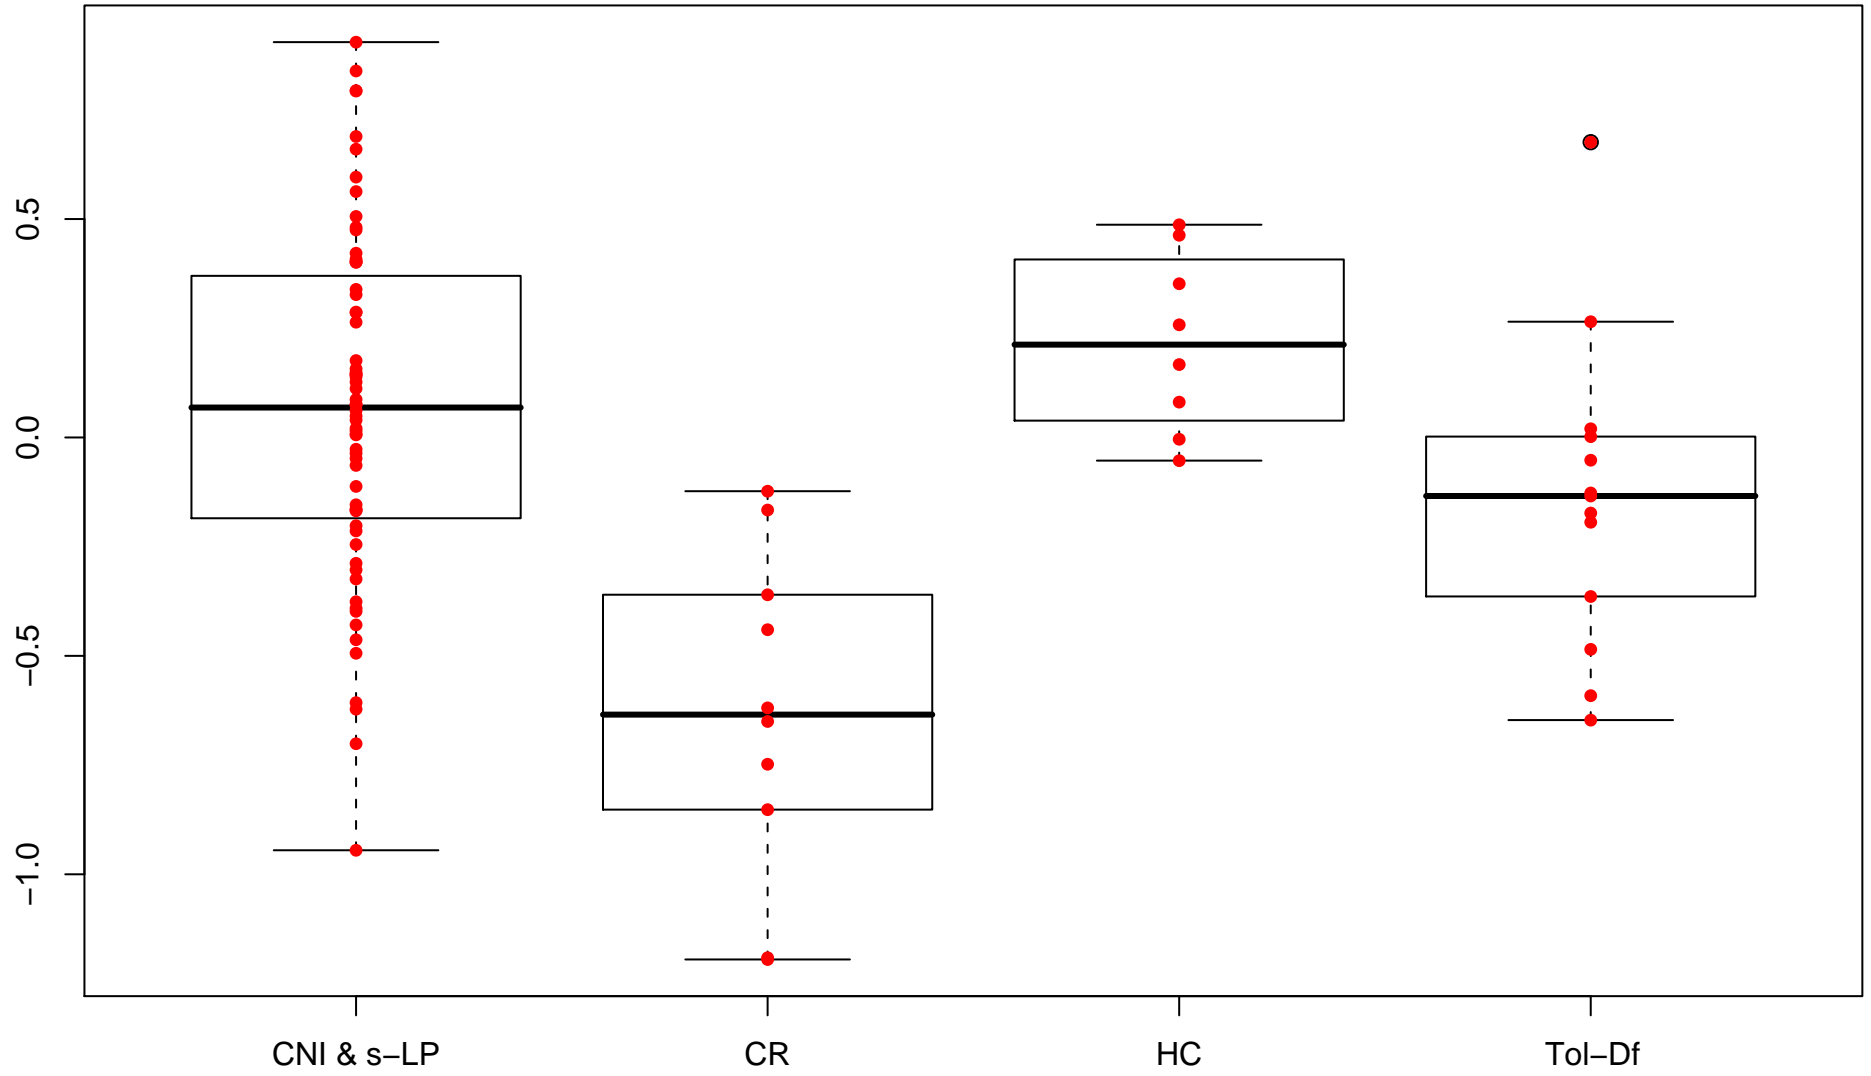

Rank 62 : CD83  
4.592e-05

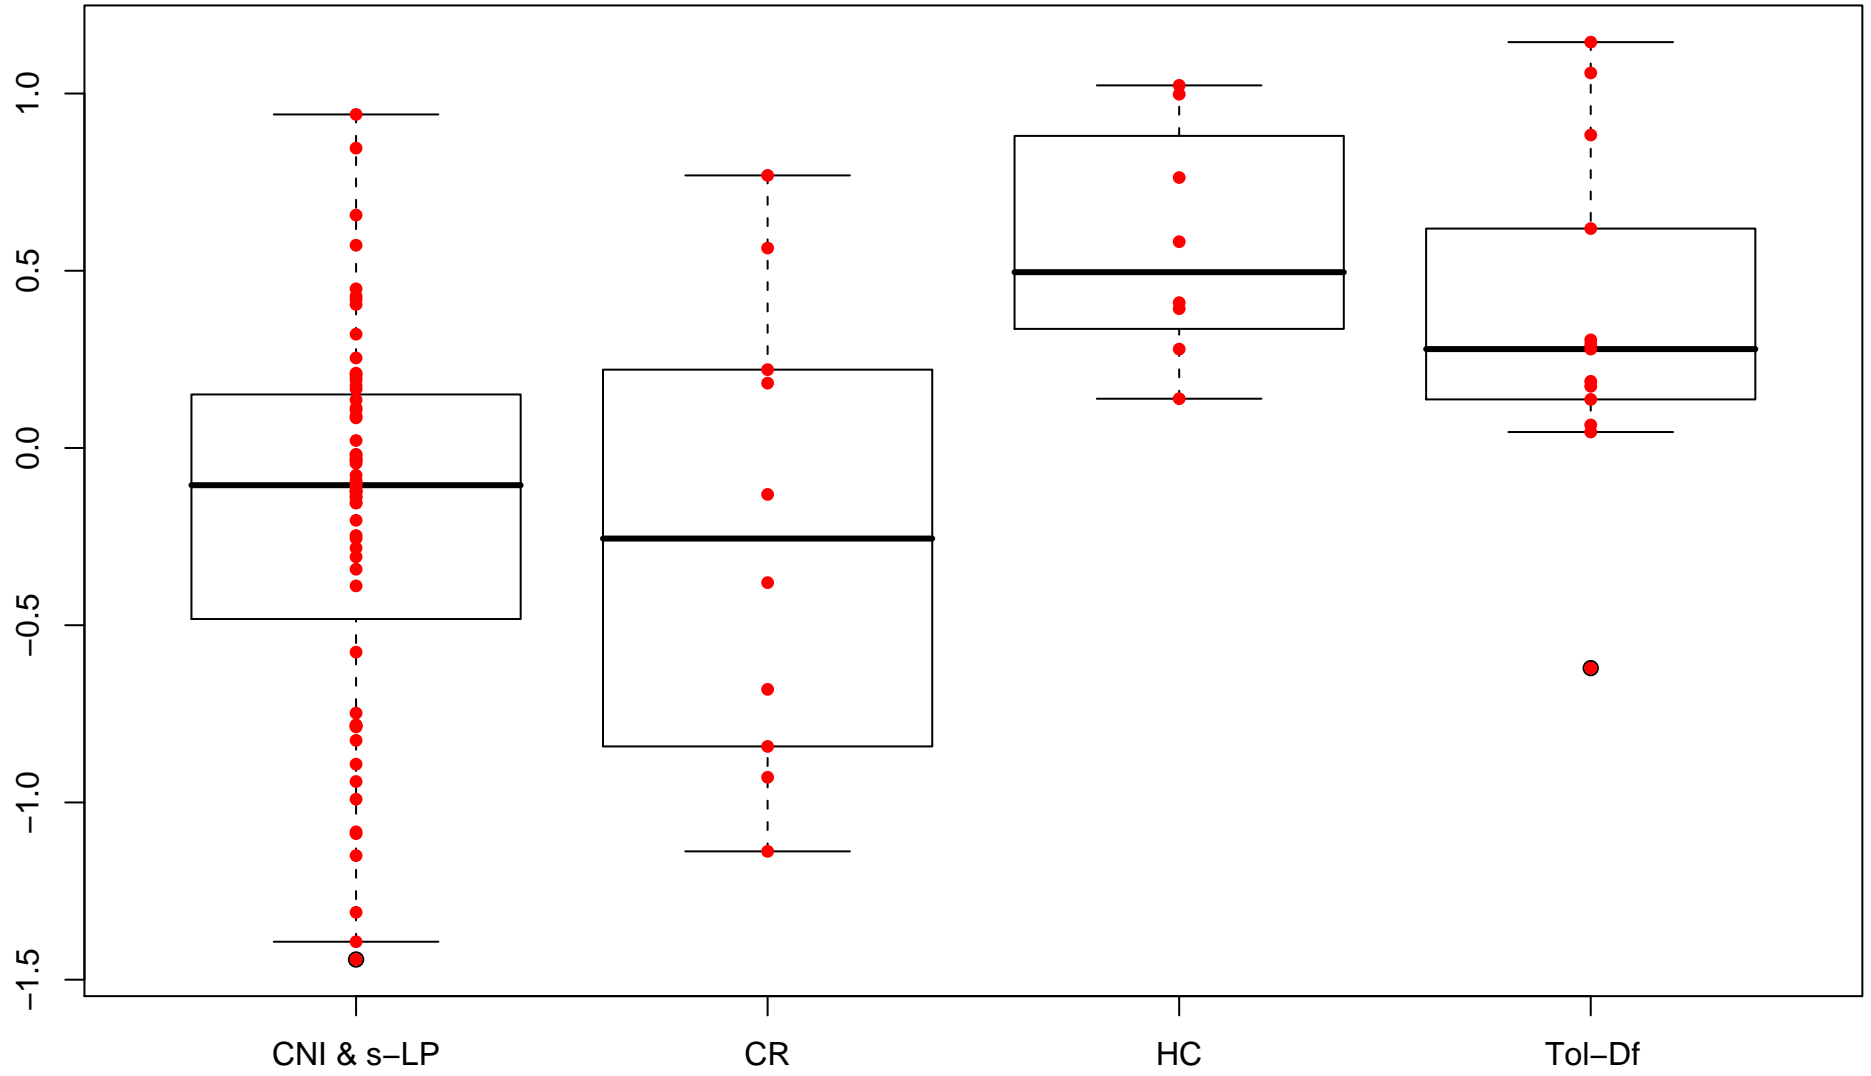

Rank 63 : GPR120  
4.776e-05

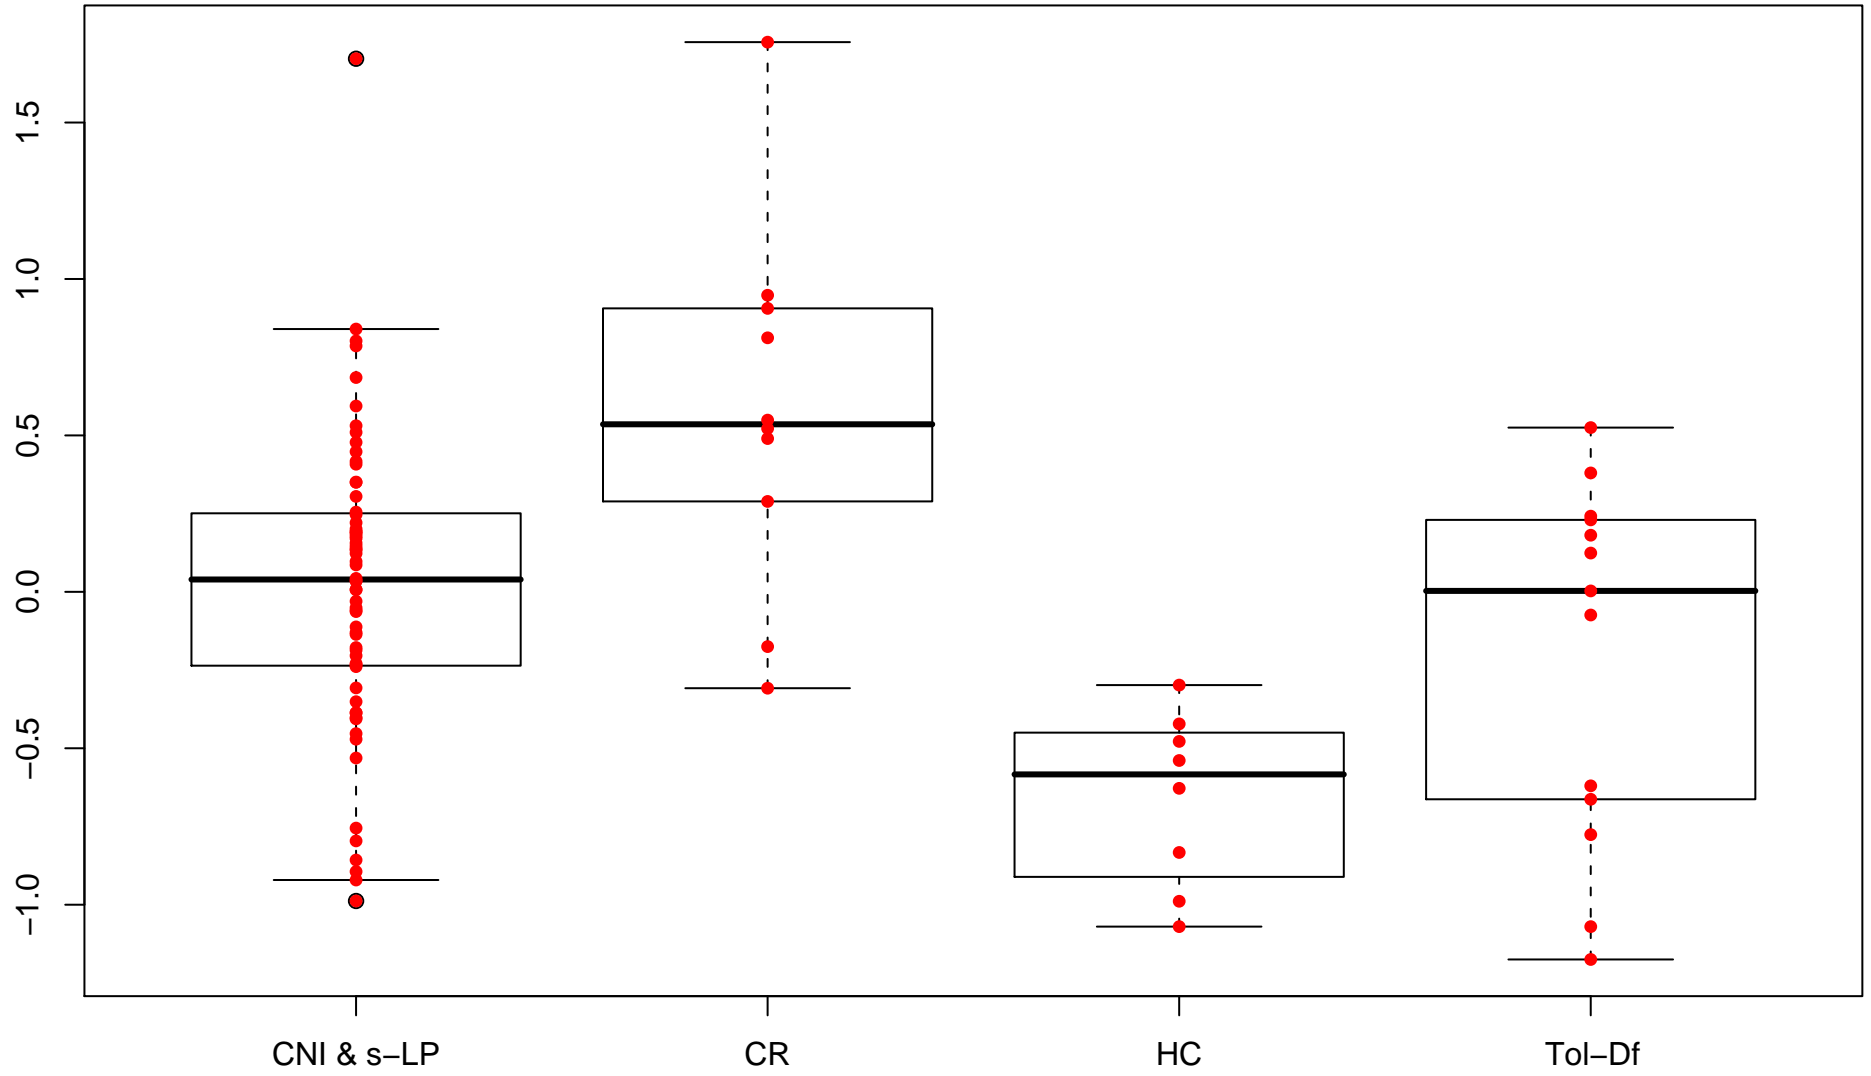

Rank 64 : FLJ23356  
5.019e-05

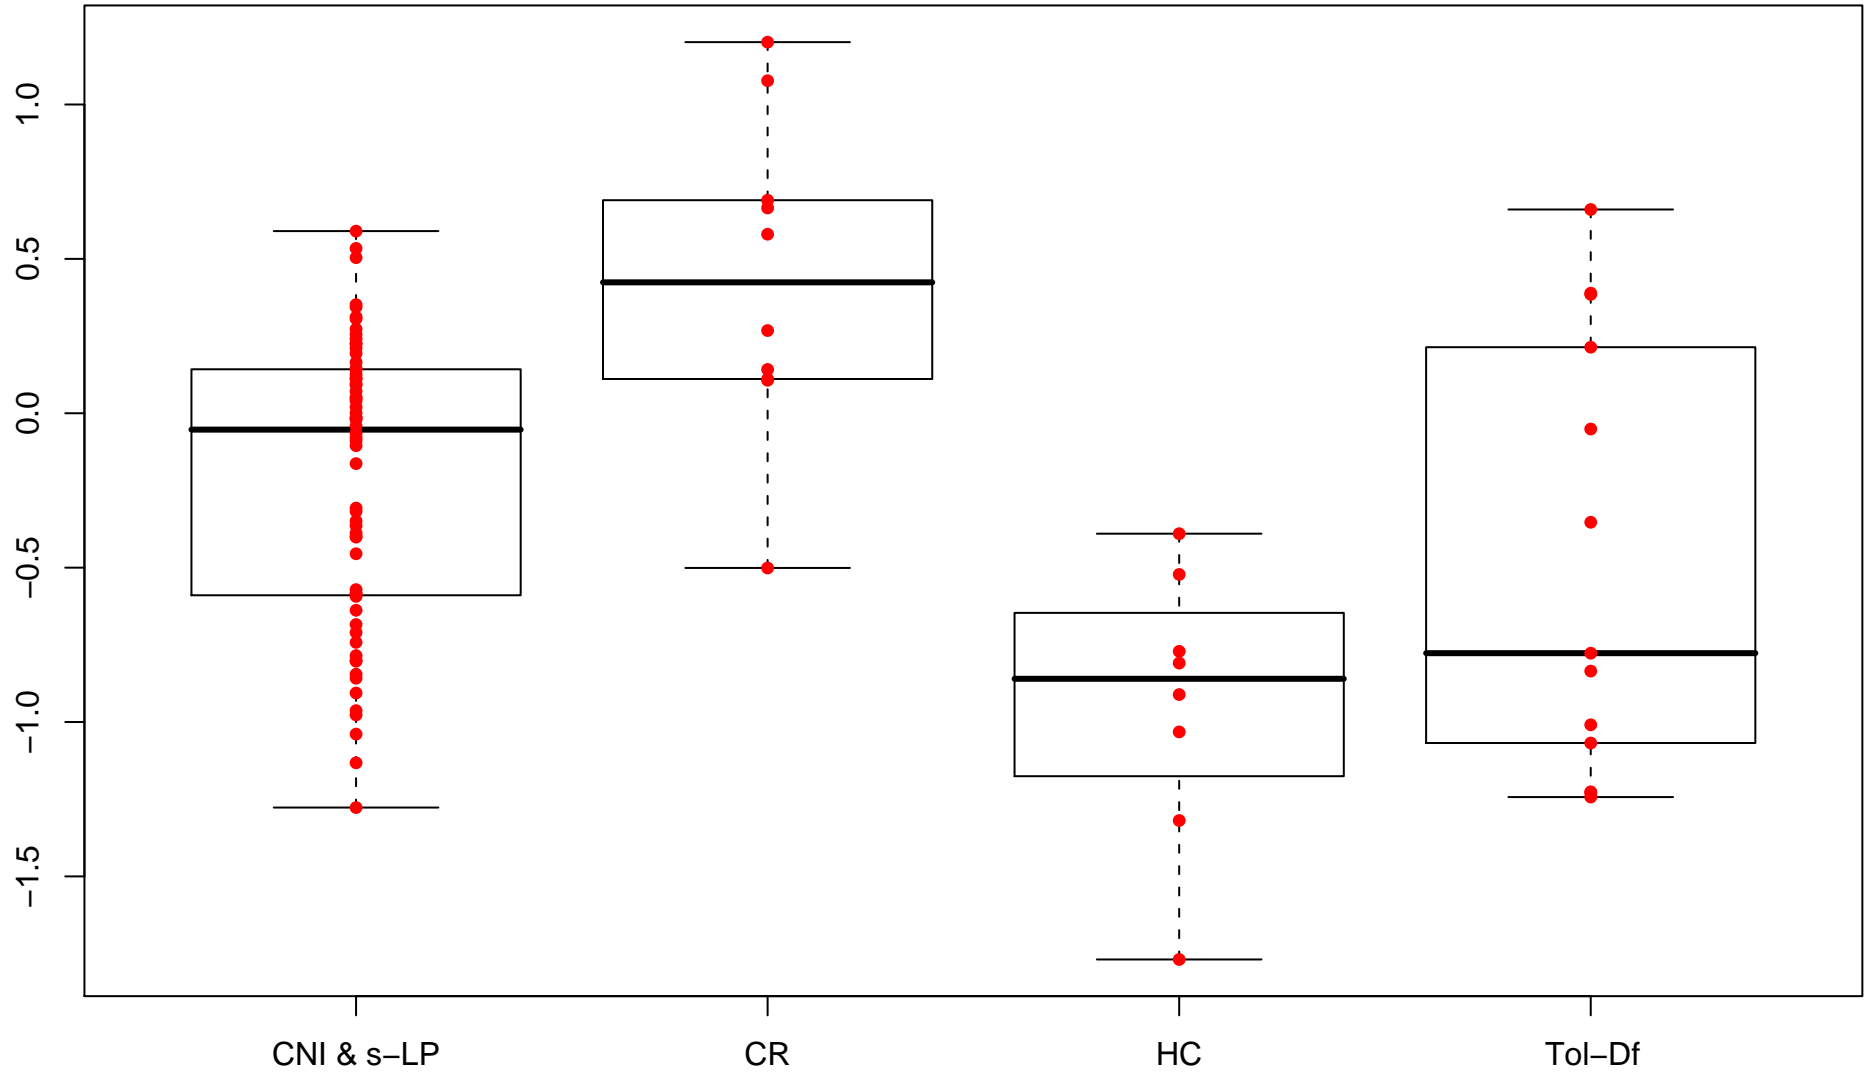

Rank 65 : FAM129A  
5.453e-05

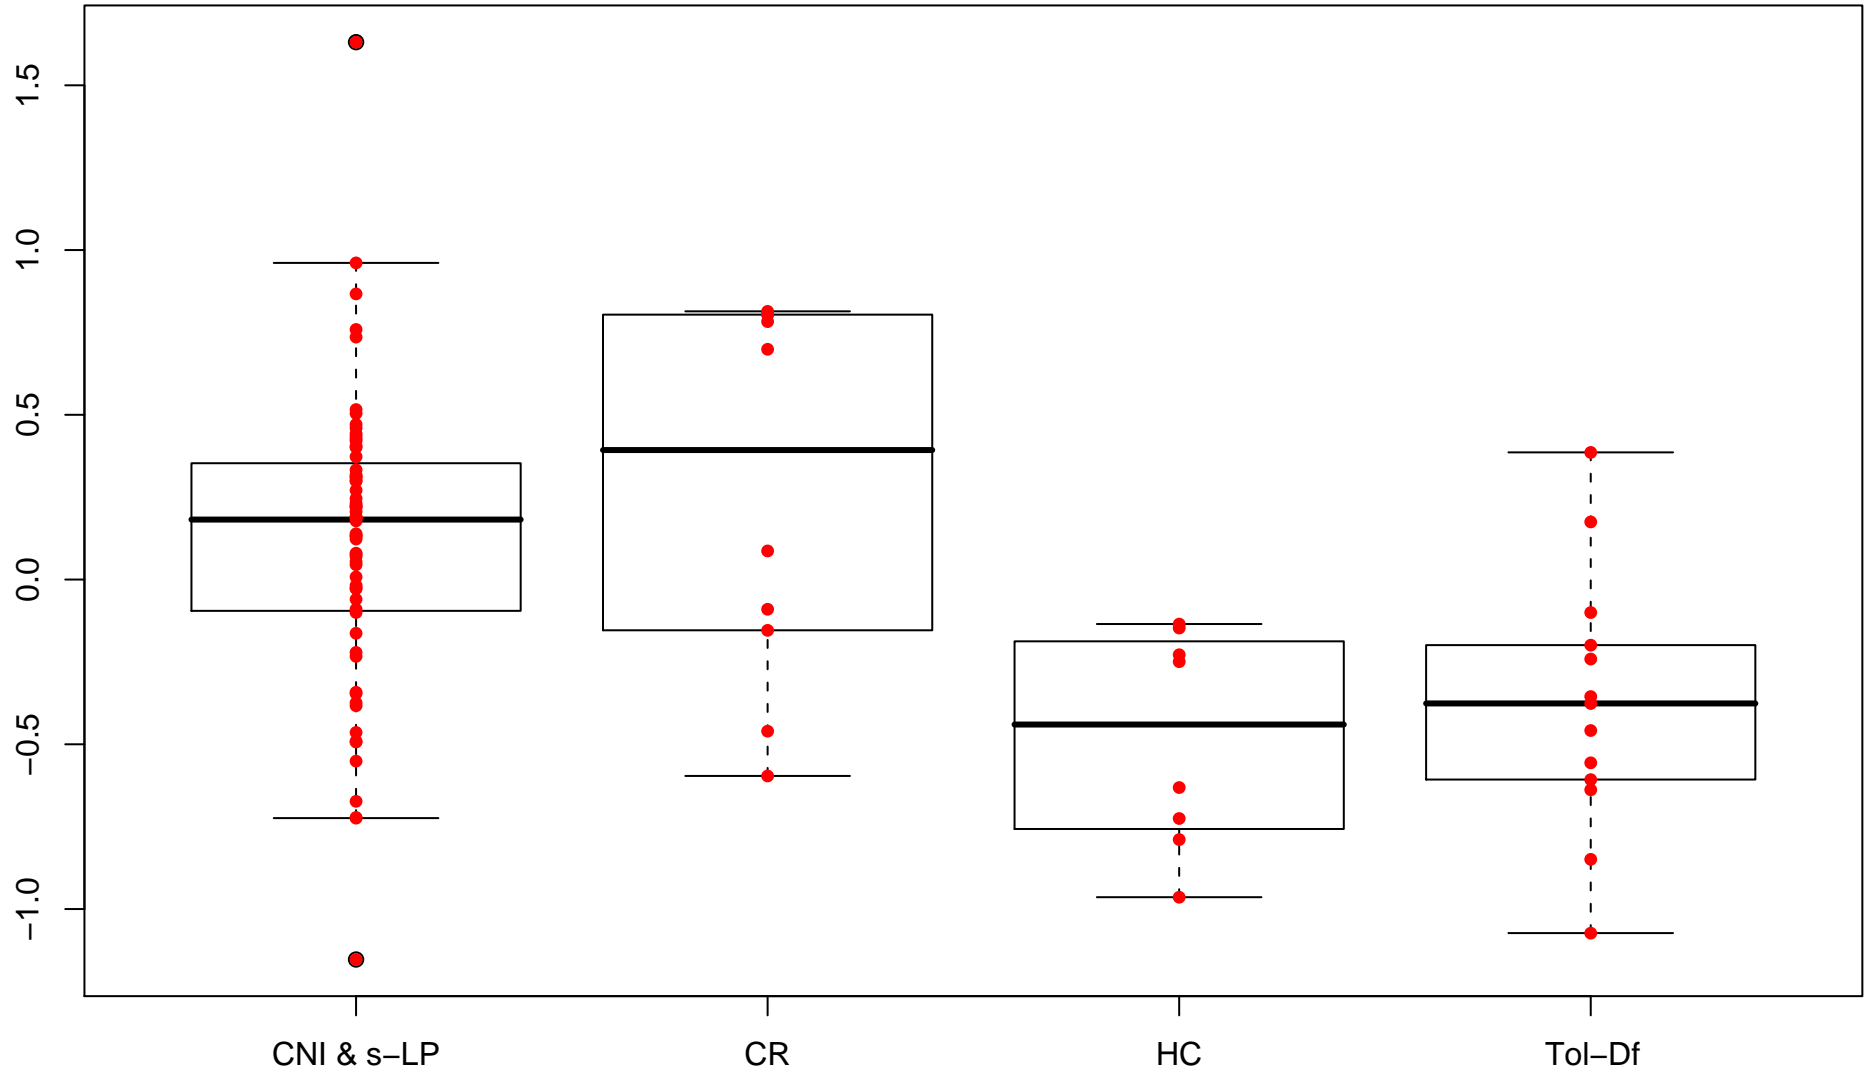

Rank 66 : ASPH  
5.49e-05

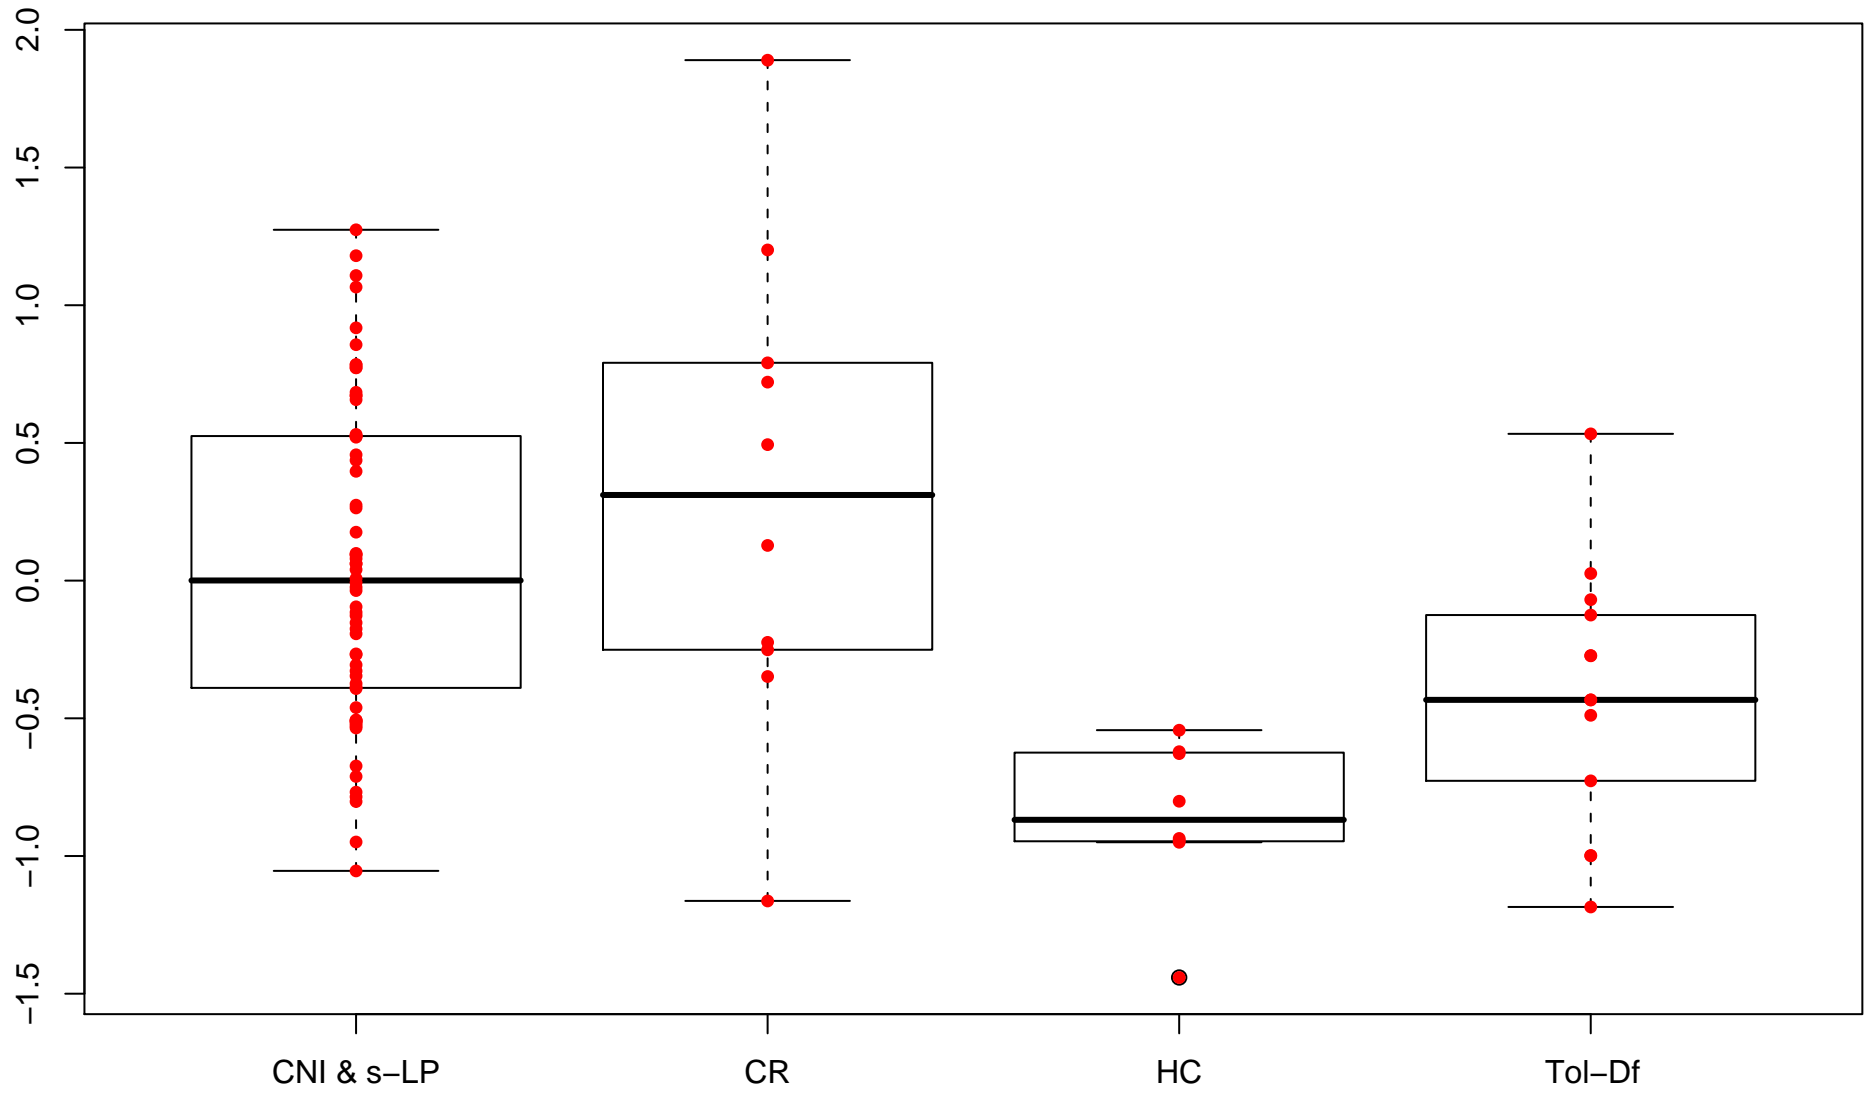



Rank 67 : MCTP1  
5.858e-05

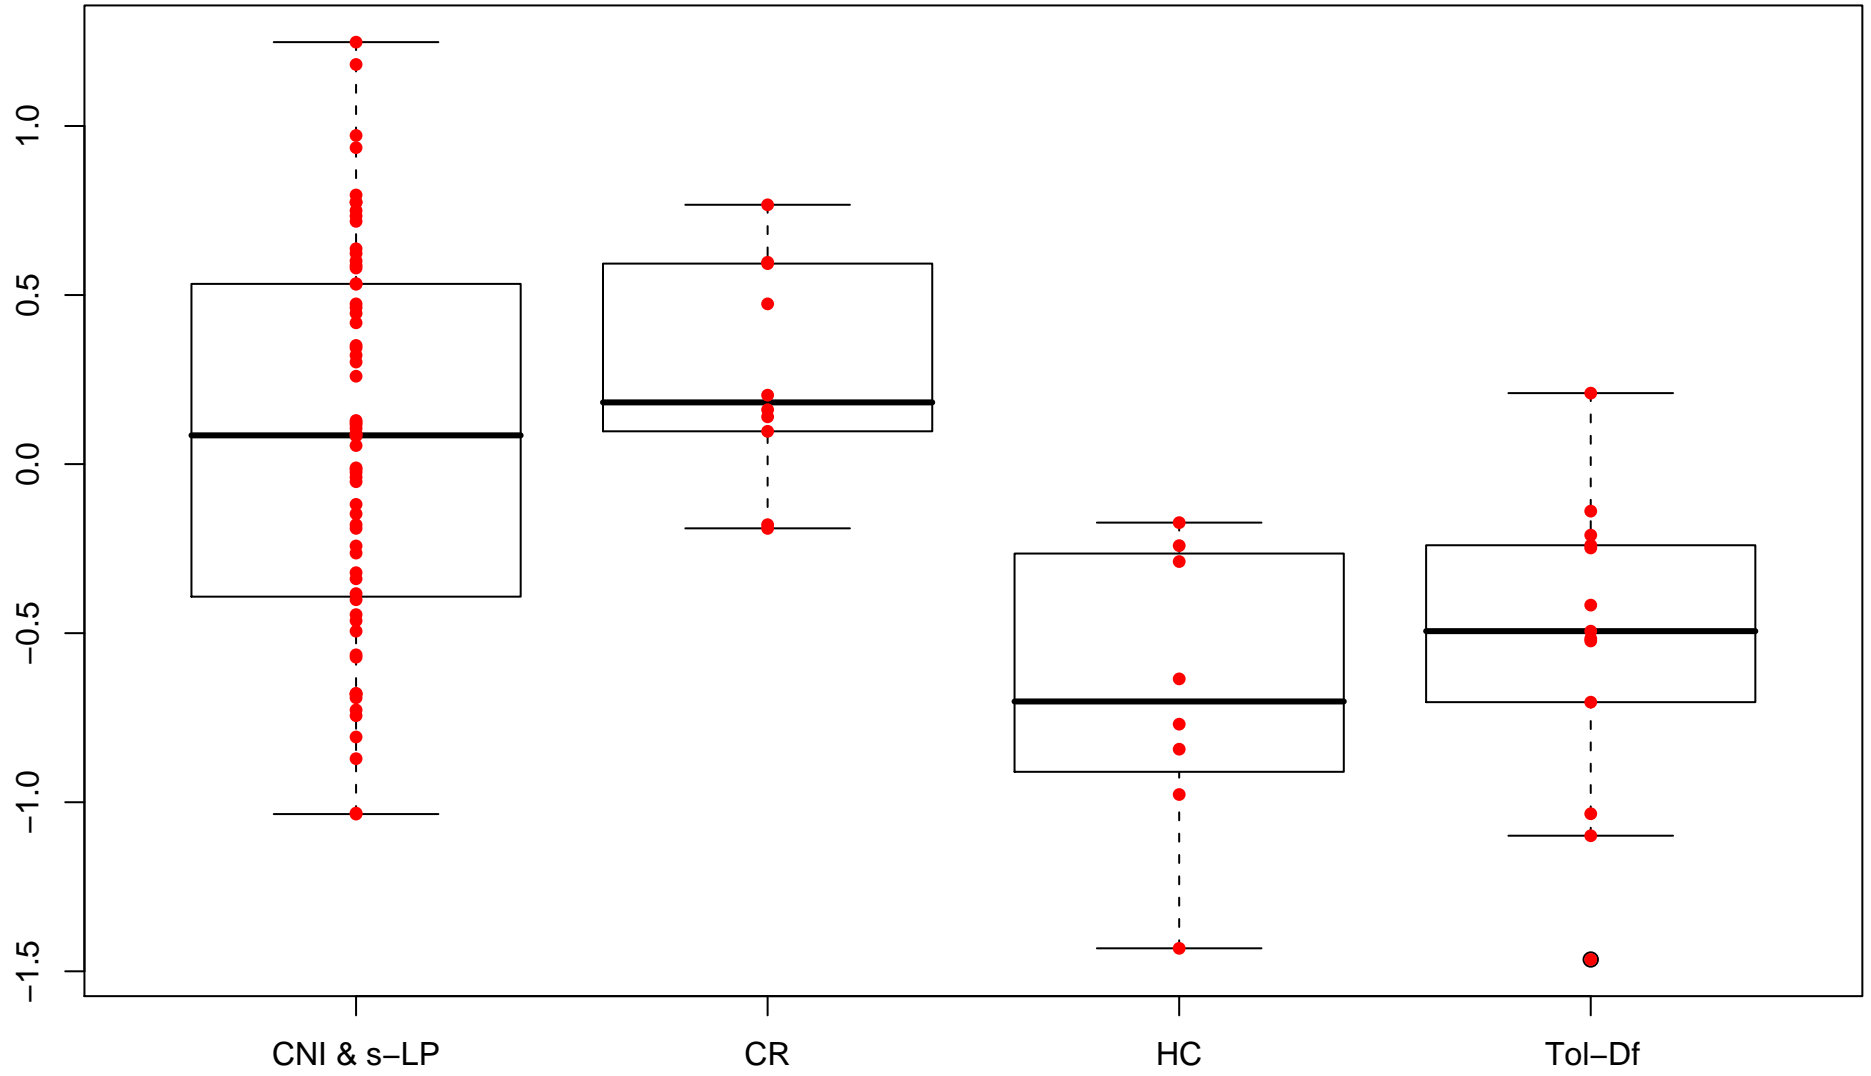

Rank 68 : SORT1  
5.895e-05

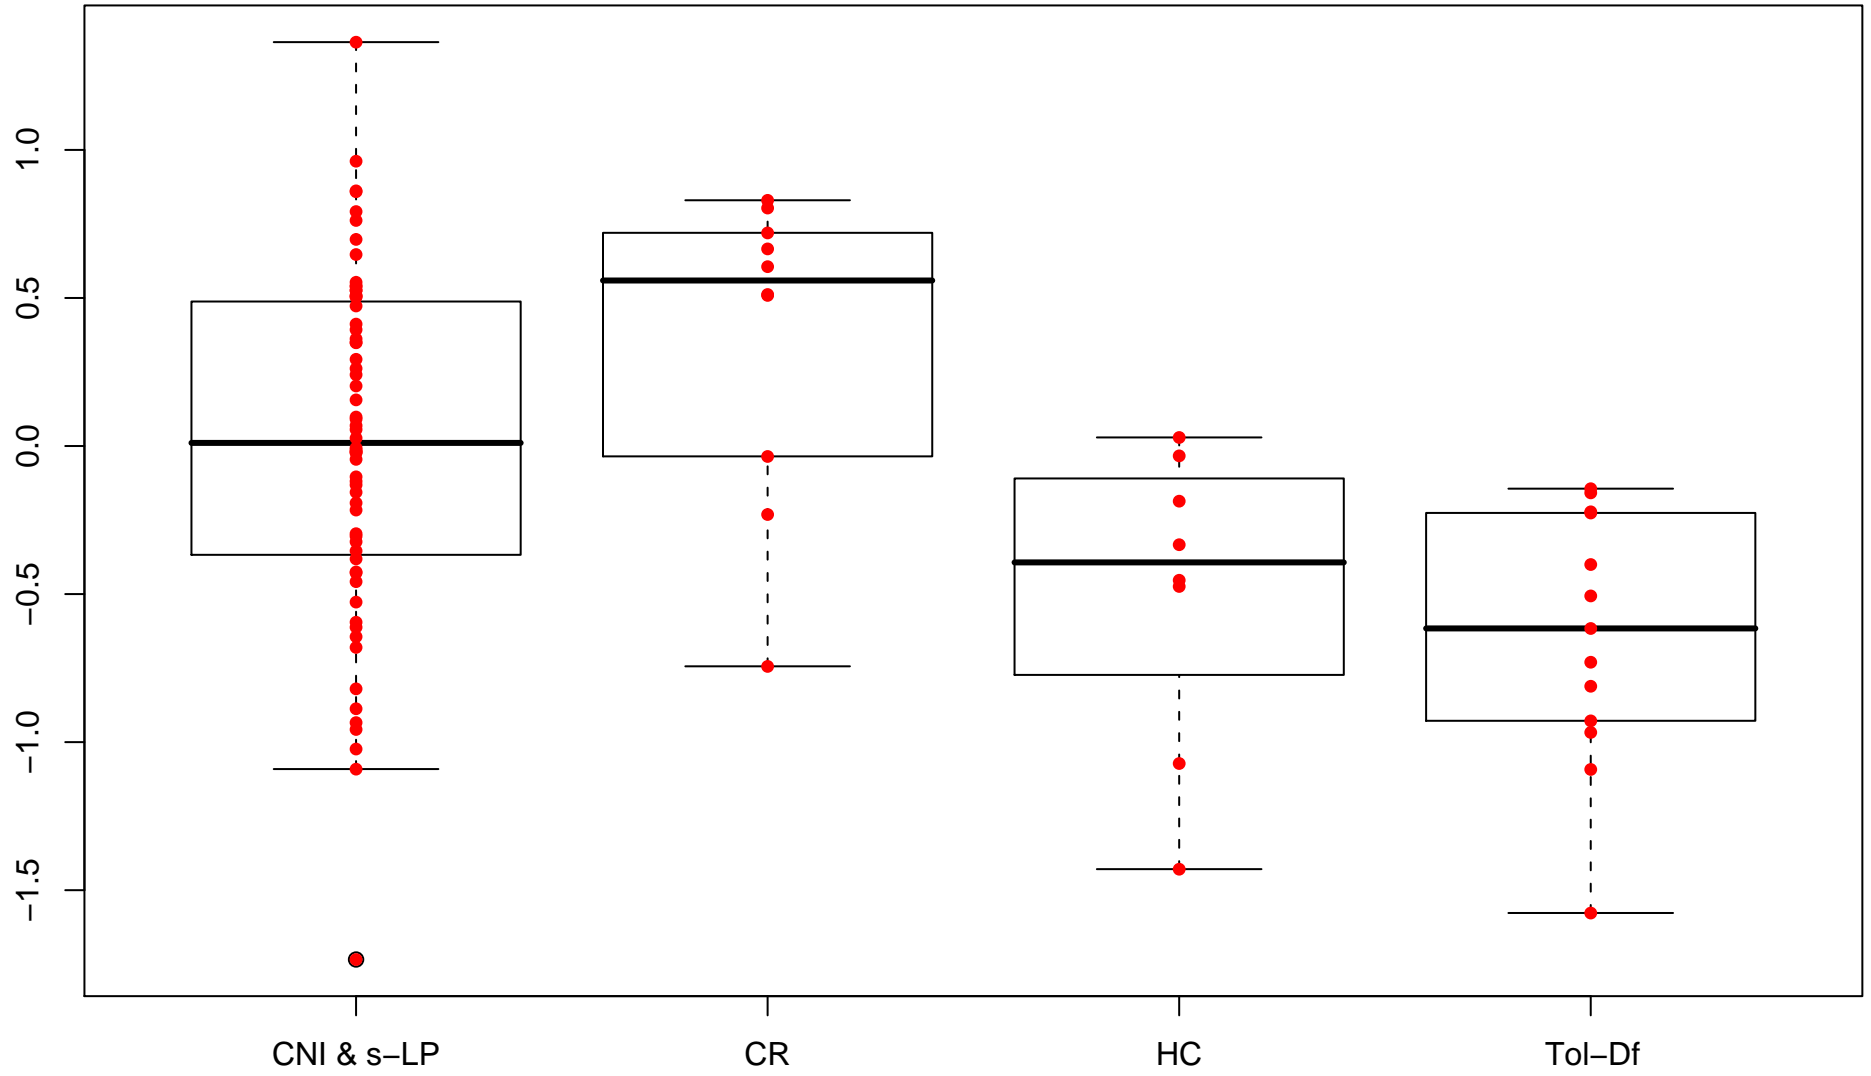

Rank 69 : F8  
6.211e-05

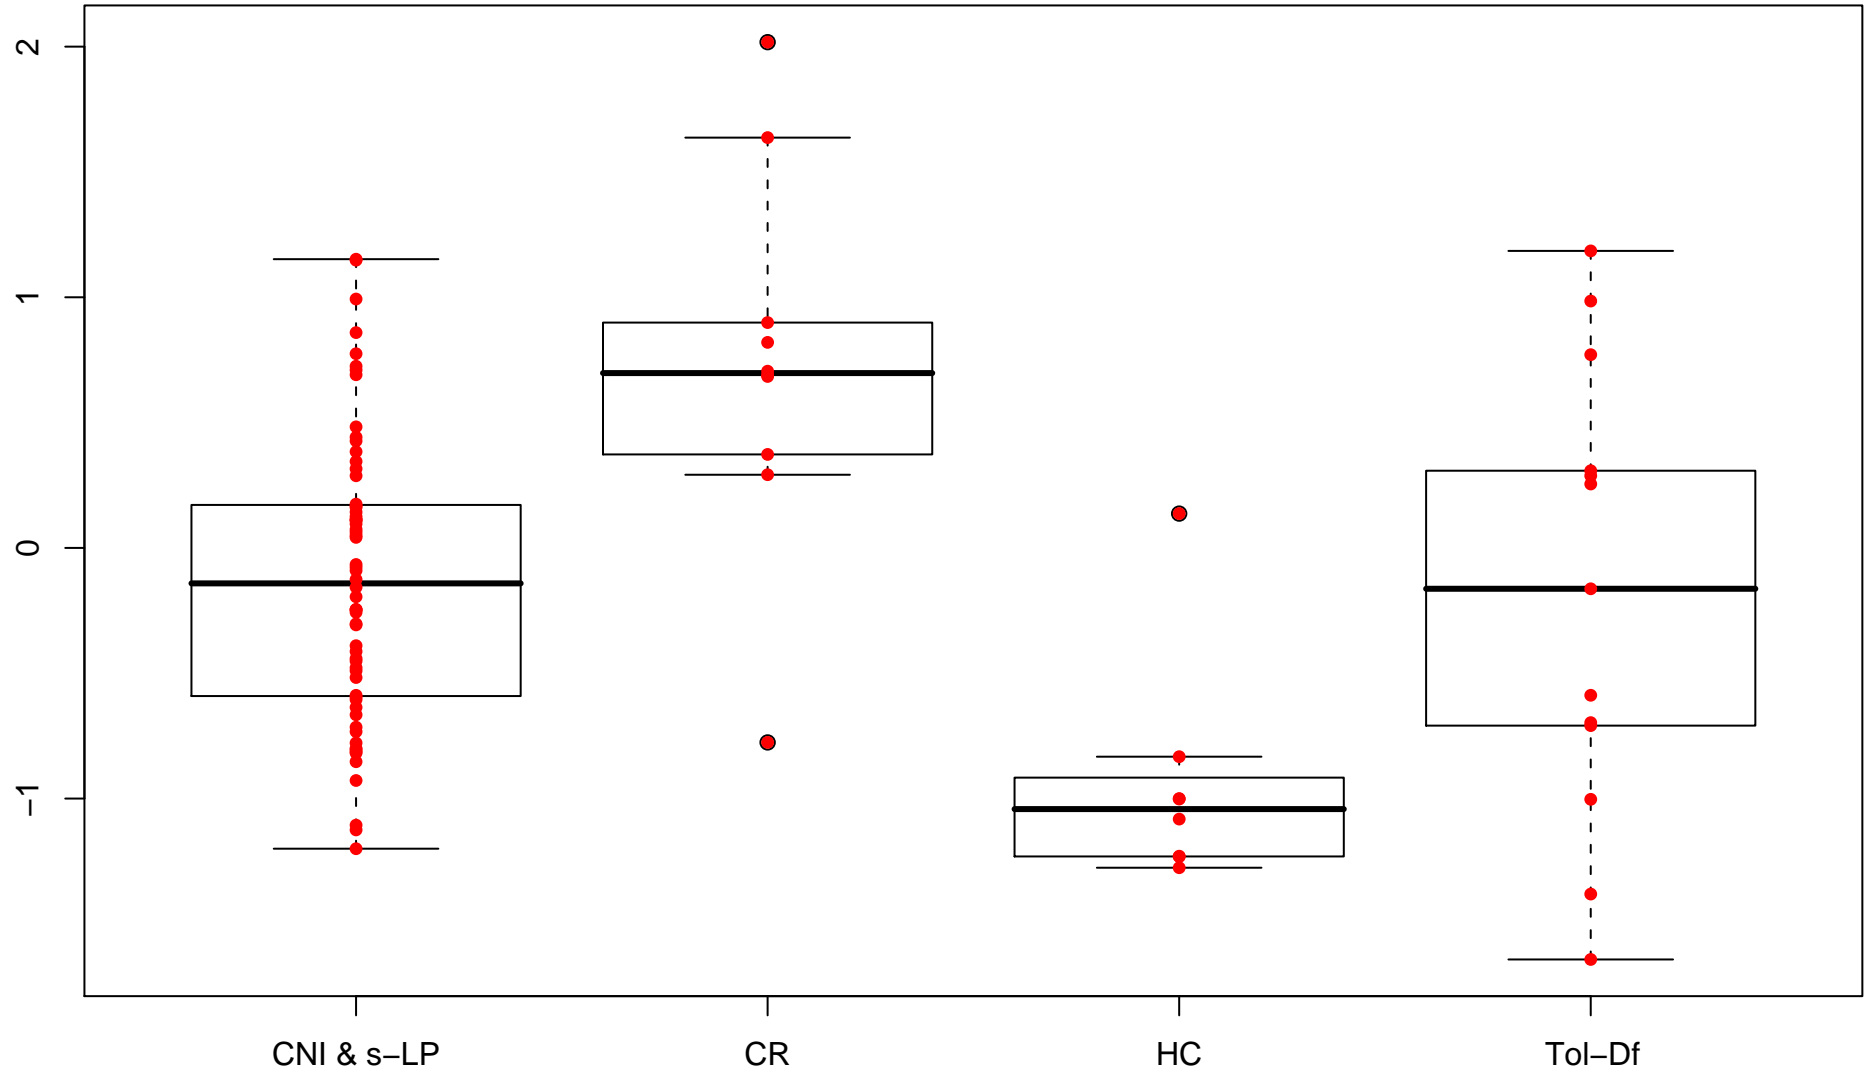

Rank 70 : TMEM49  
6.878e-05

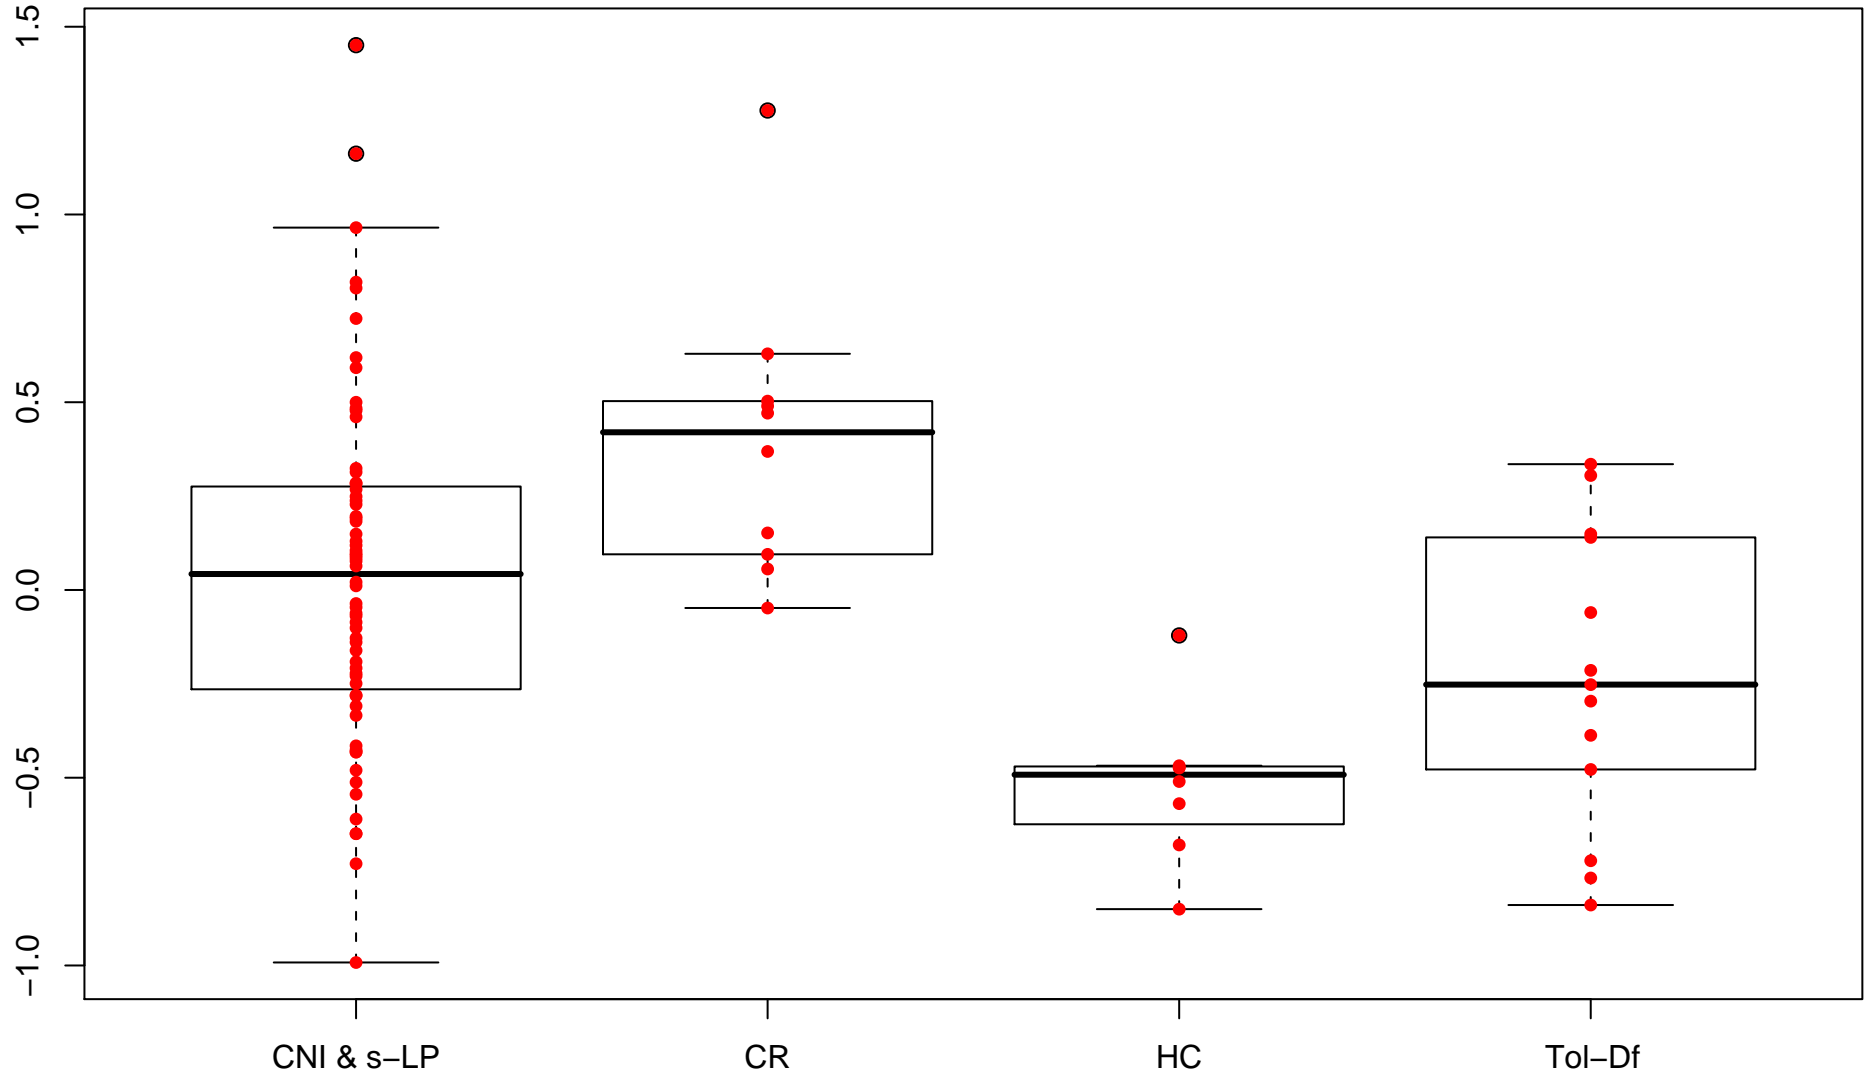

Rank 71 : MBOAT2  
6.937e-05

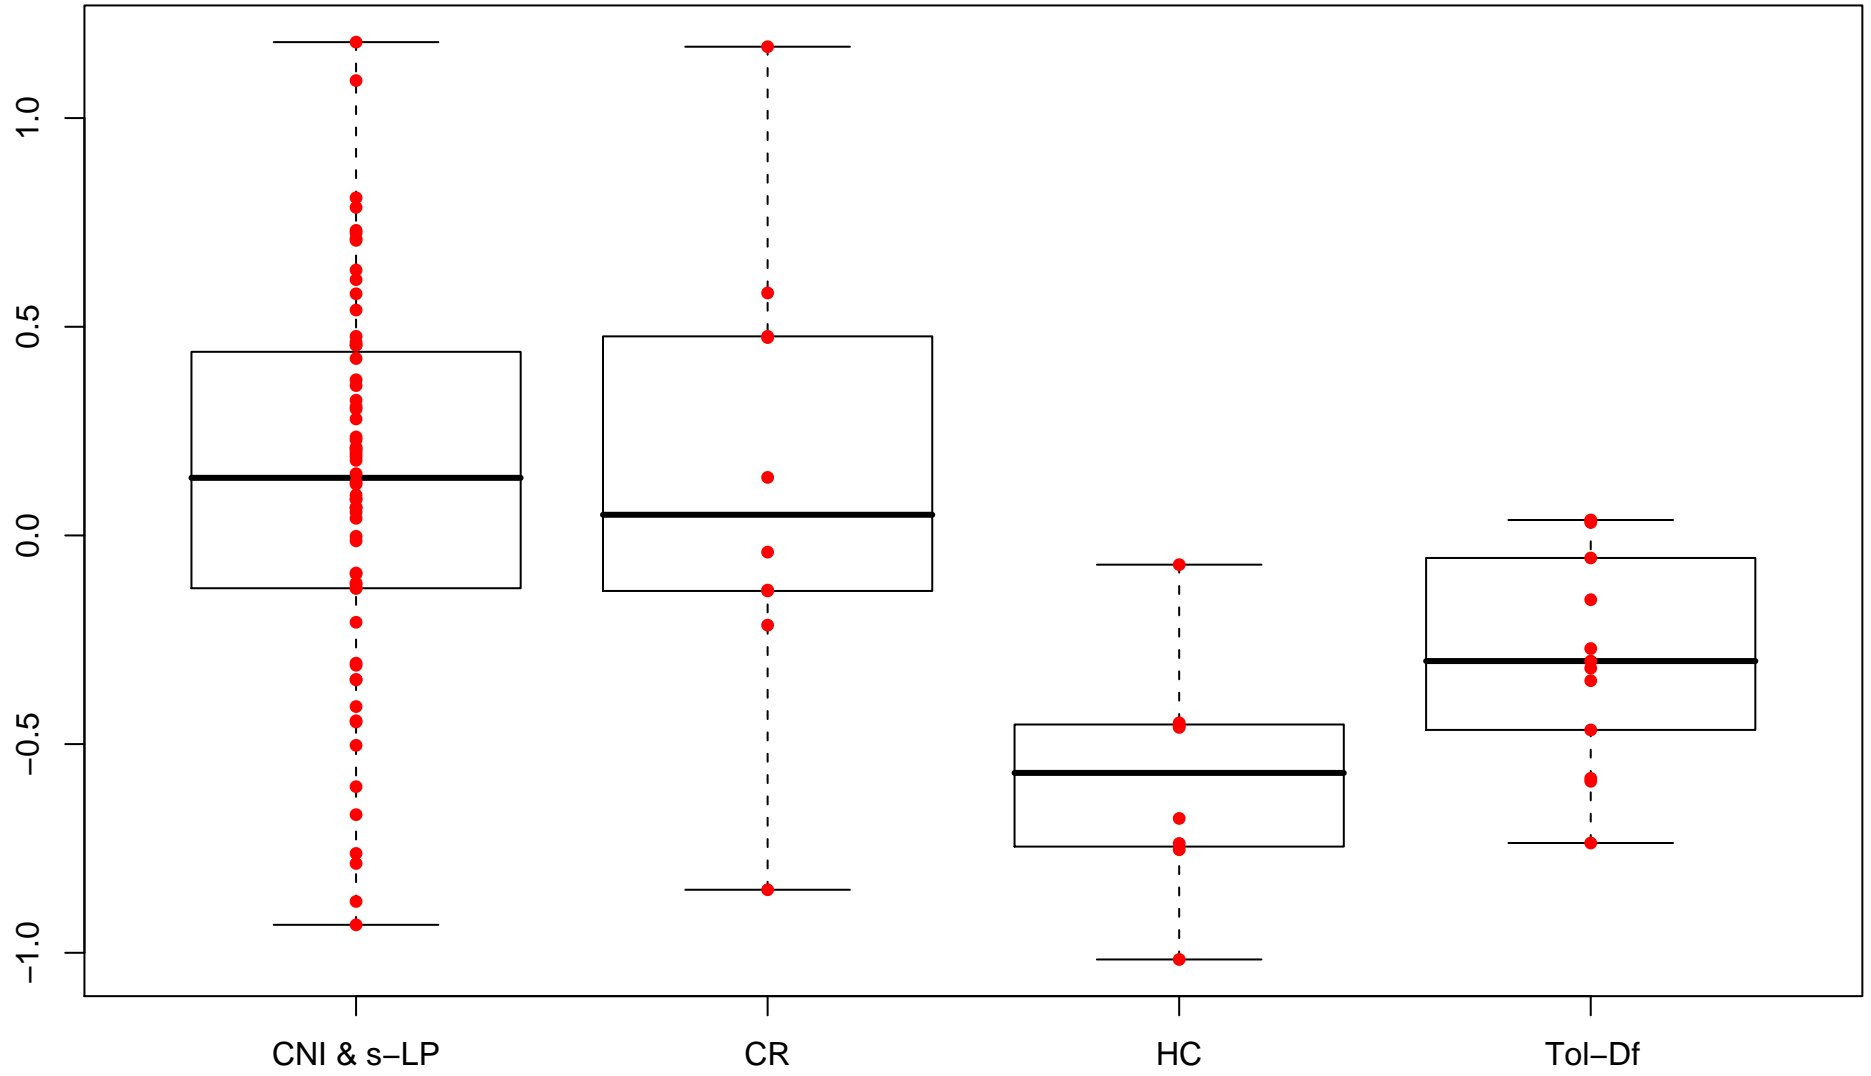

Rank 72 : SORL1  
7.092e-05

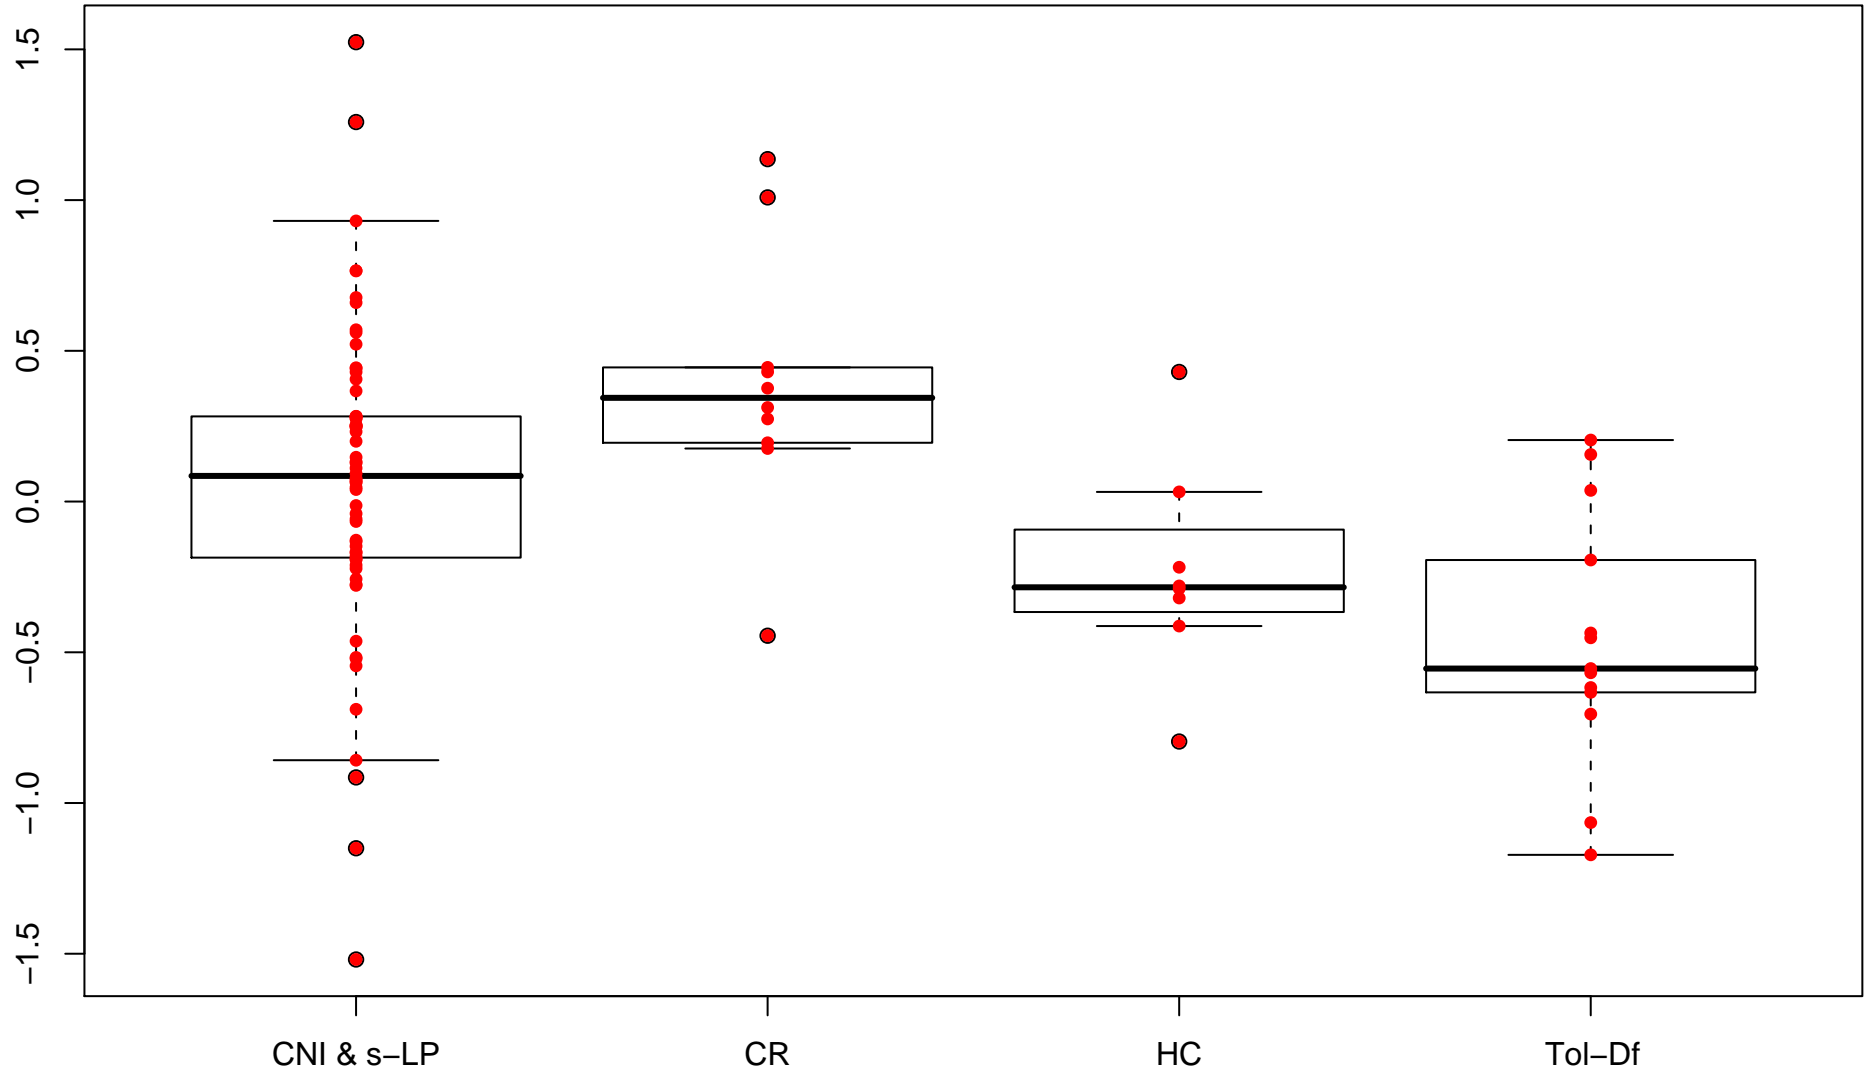

Rank 73 : IQGAP1  
7.171e-05

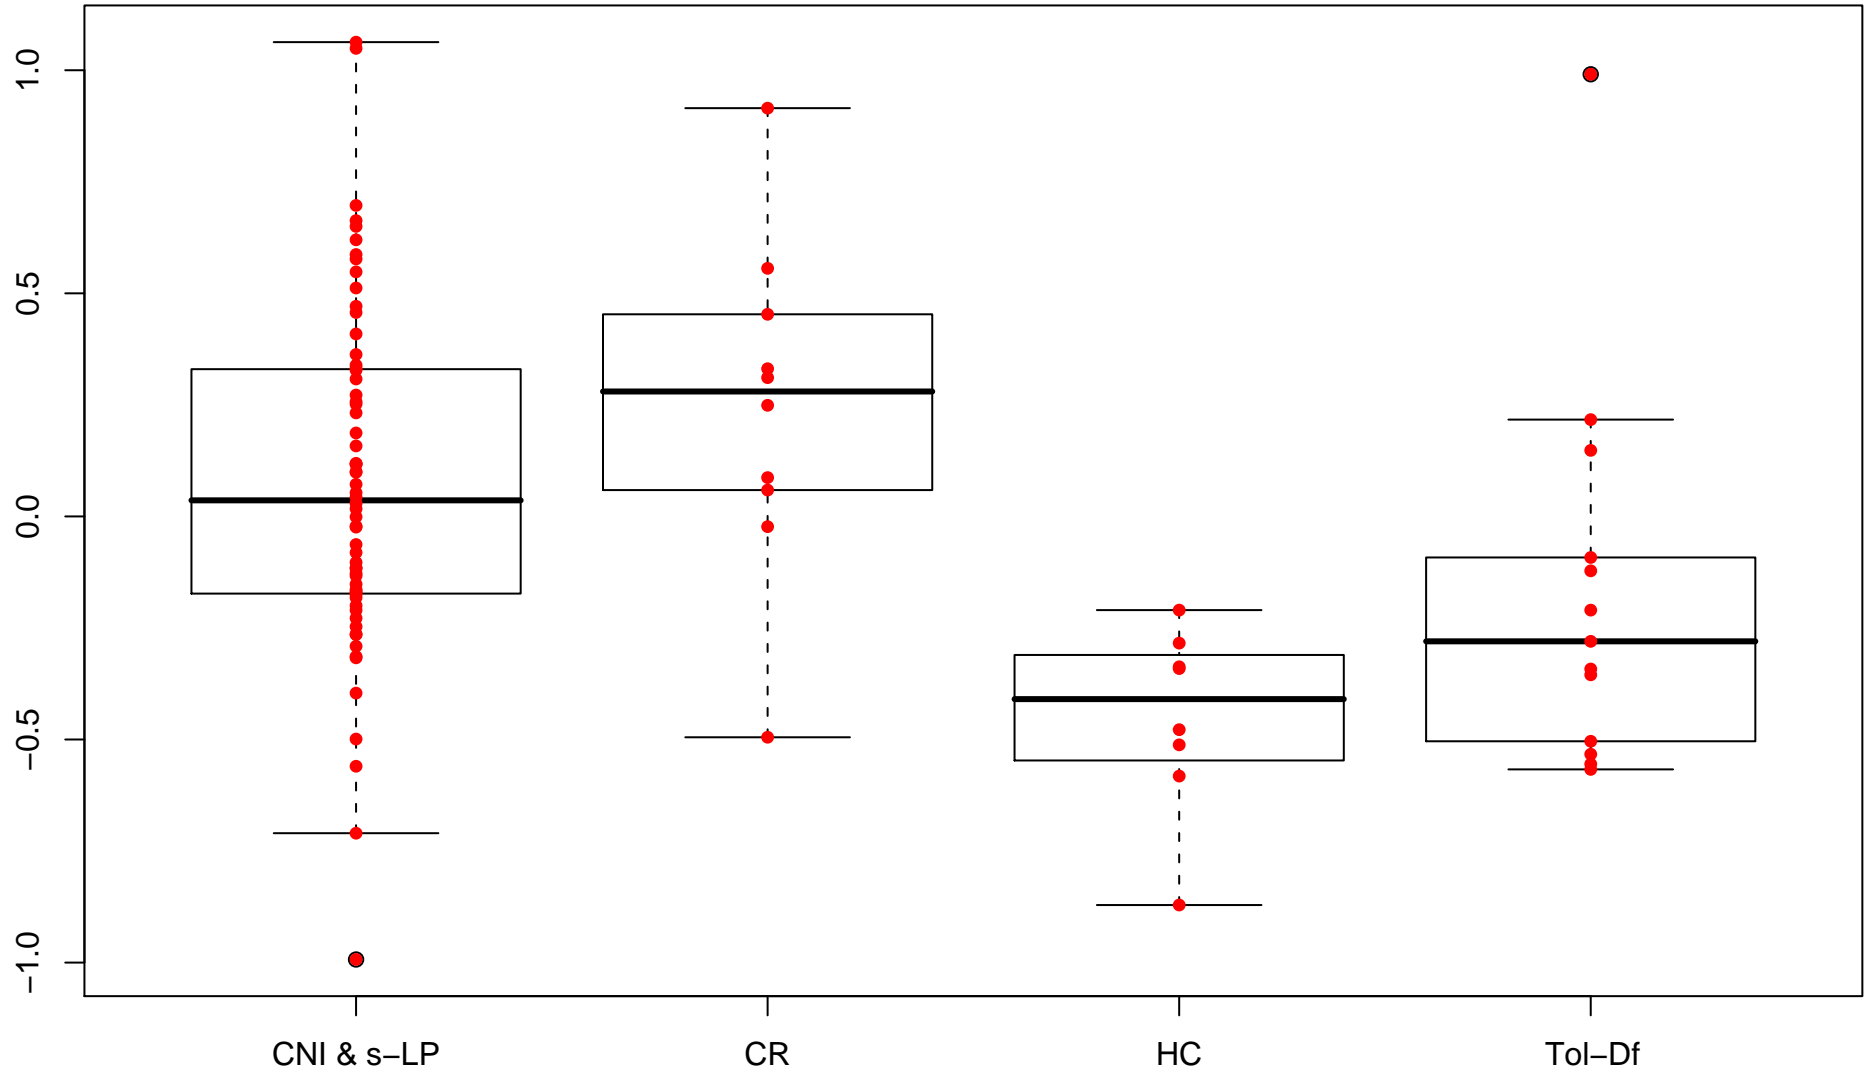

Rank 74 : CLEC6A  
7.776e-05

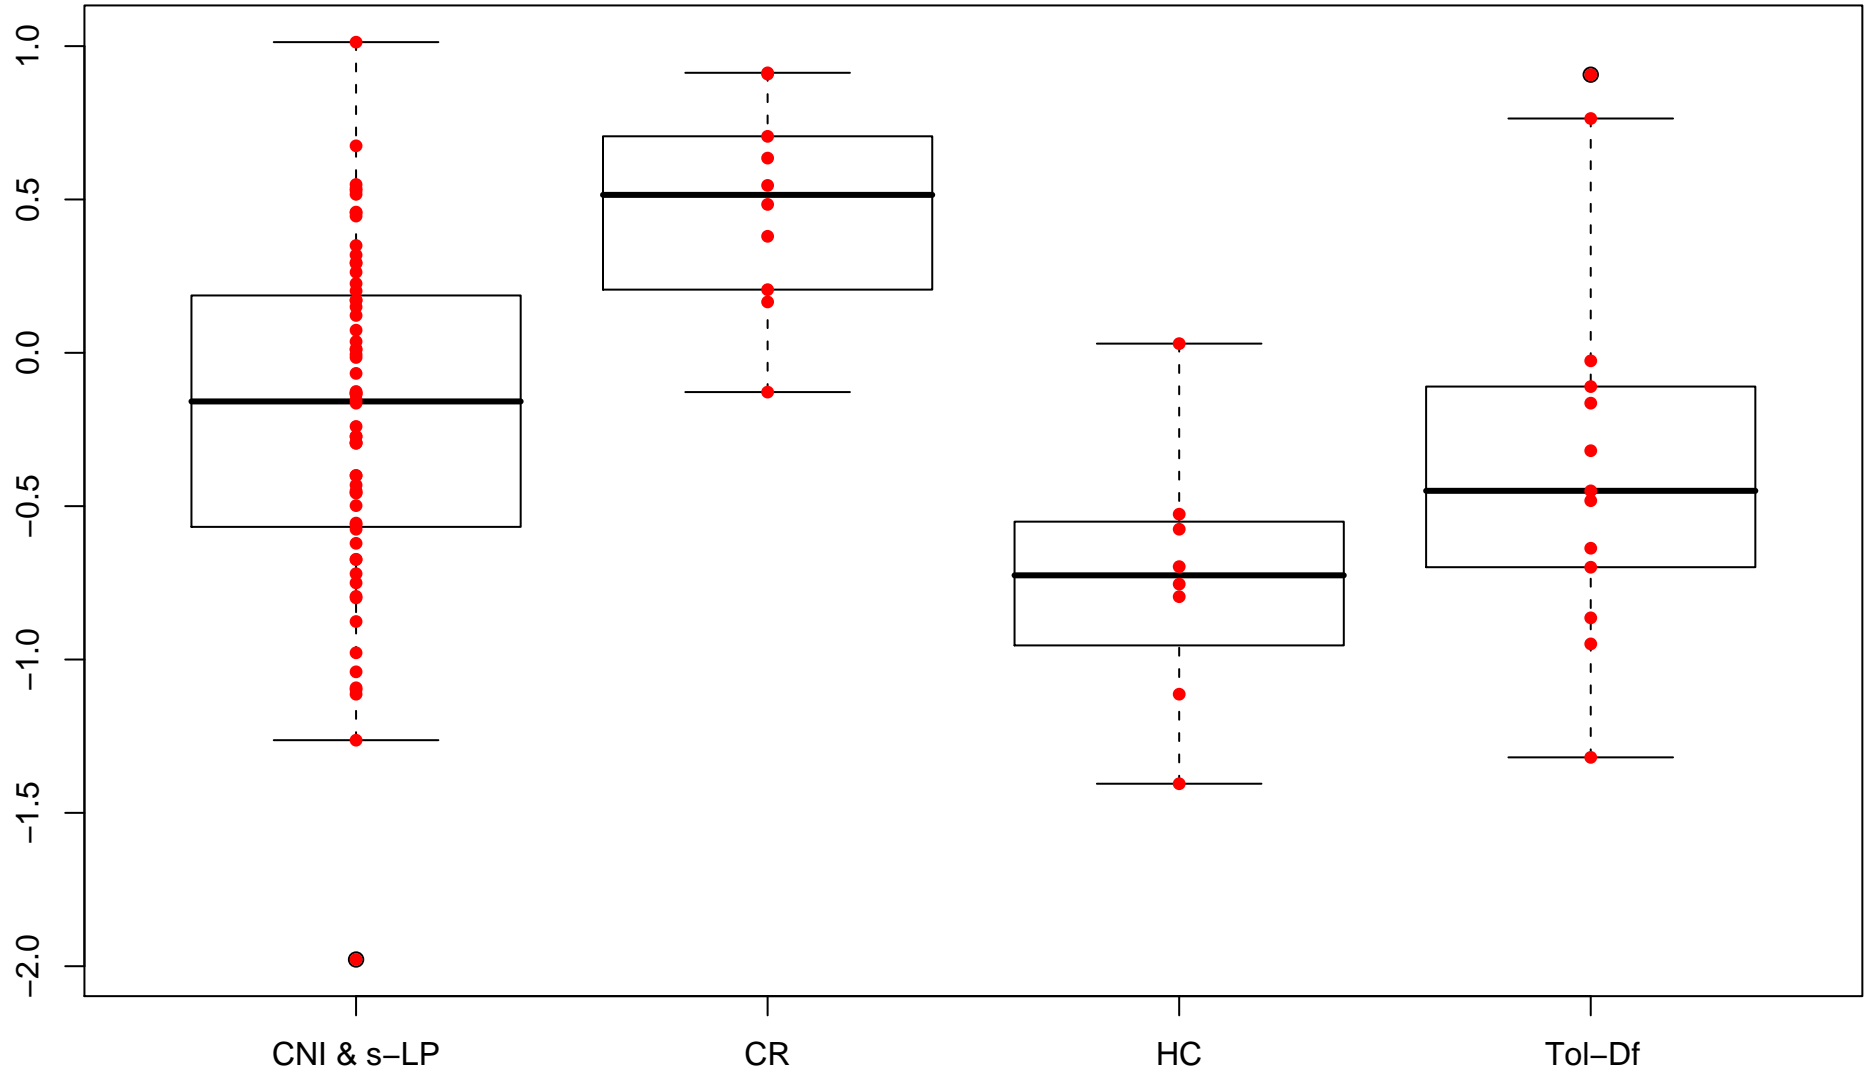



Rank 75 : SIRPA  
7.782e-05

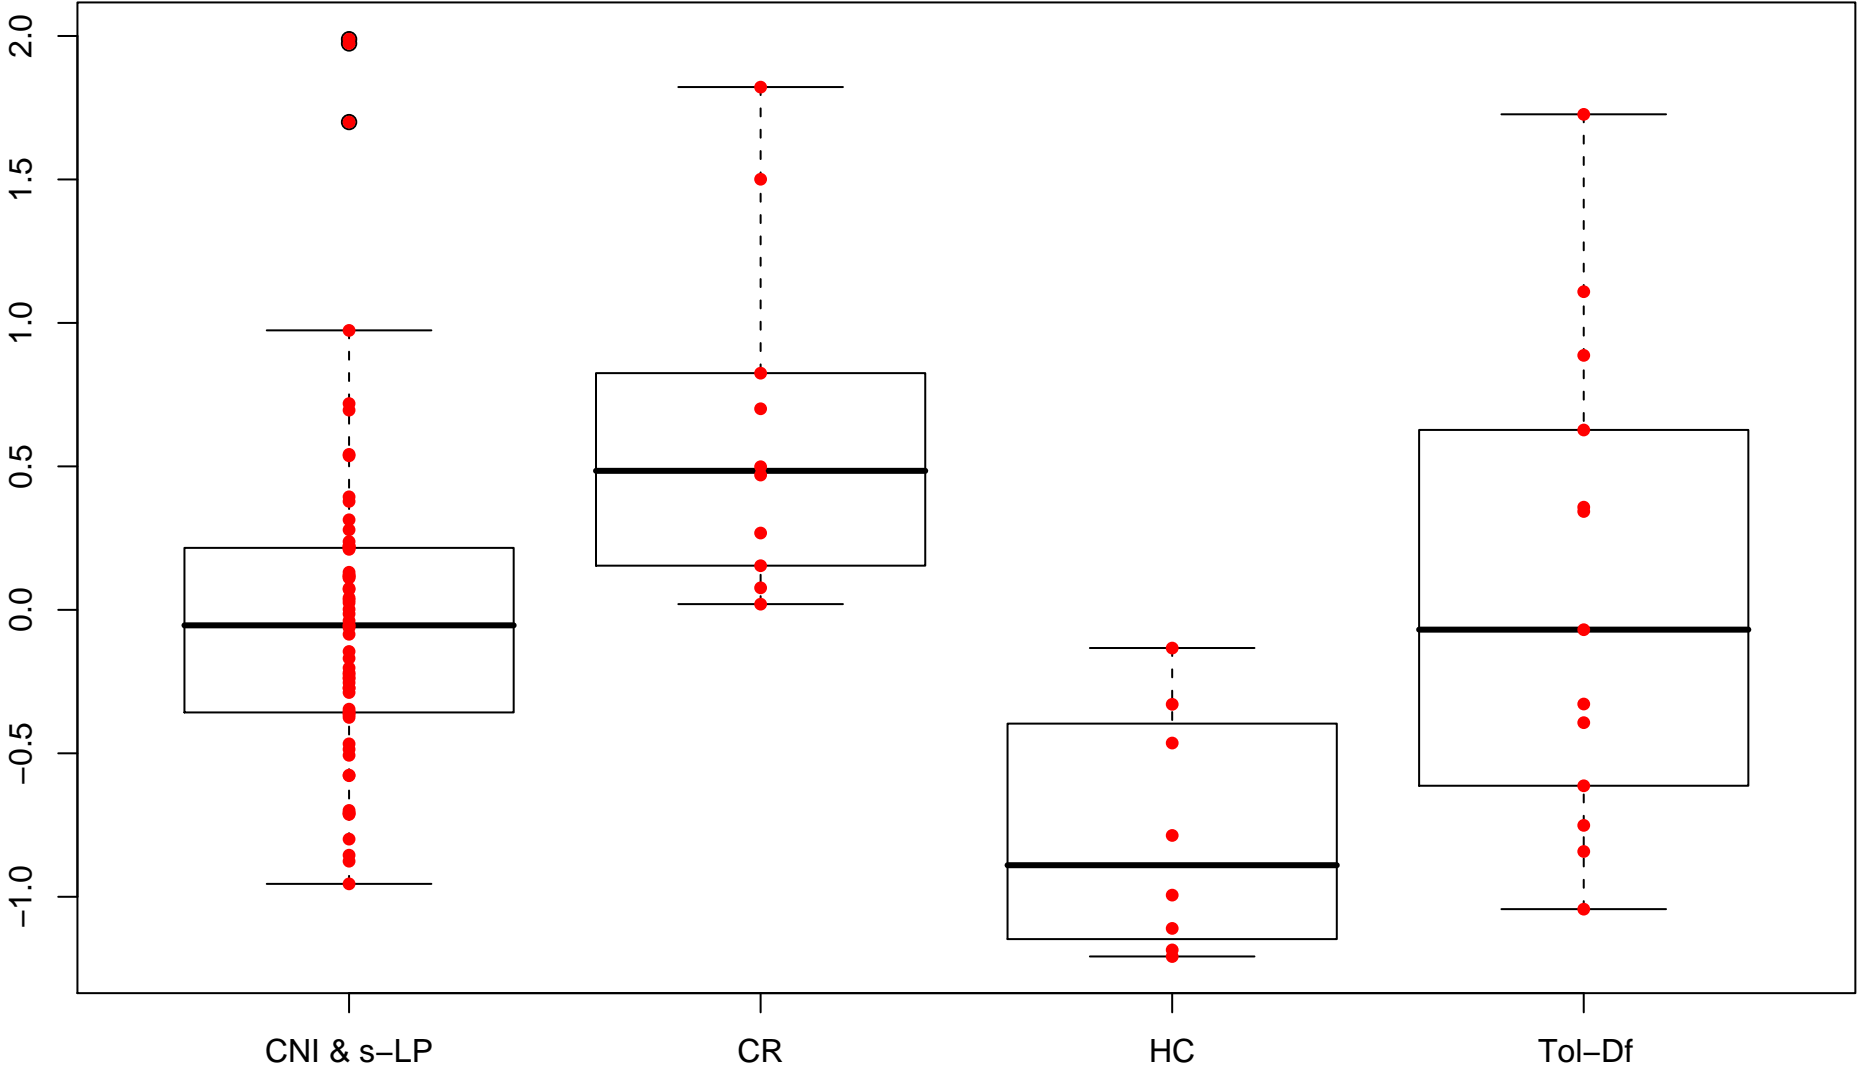

Rank 76 : PDHX  
8.241e-05

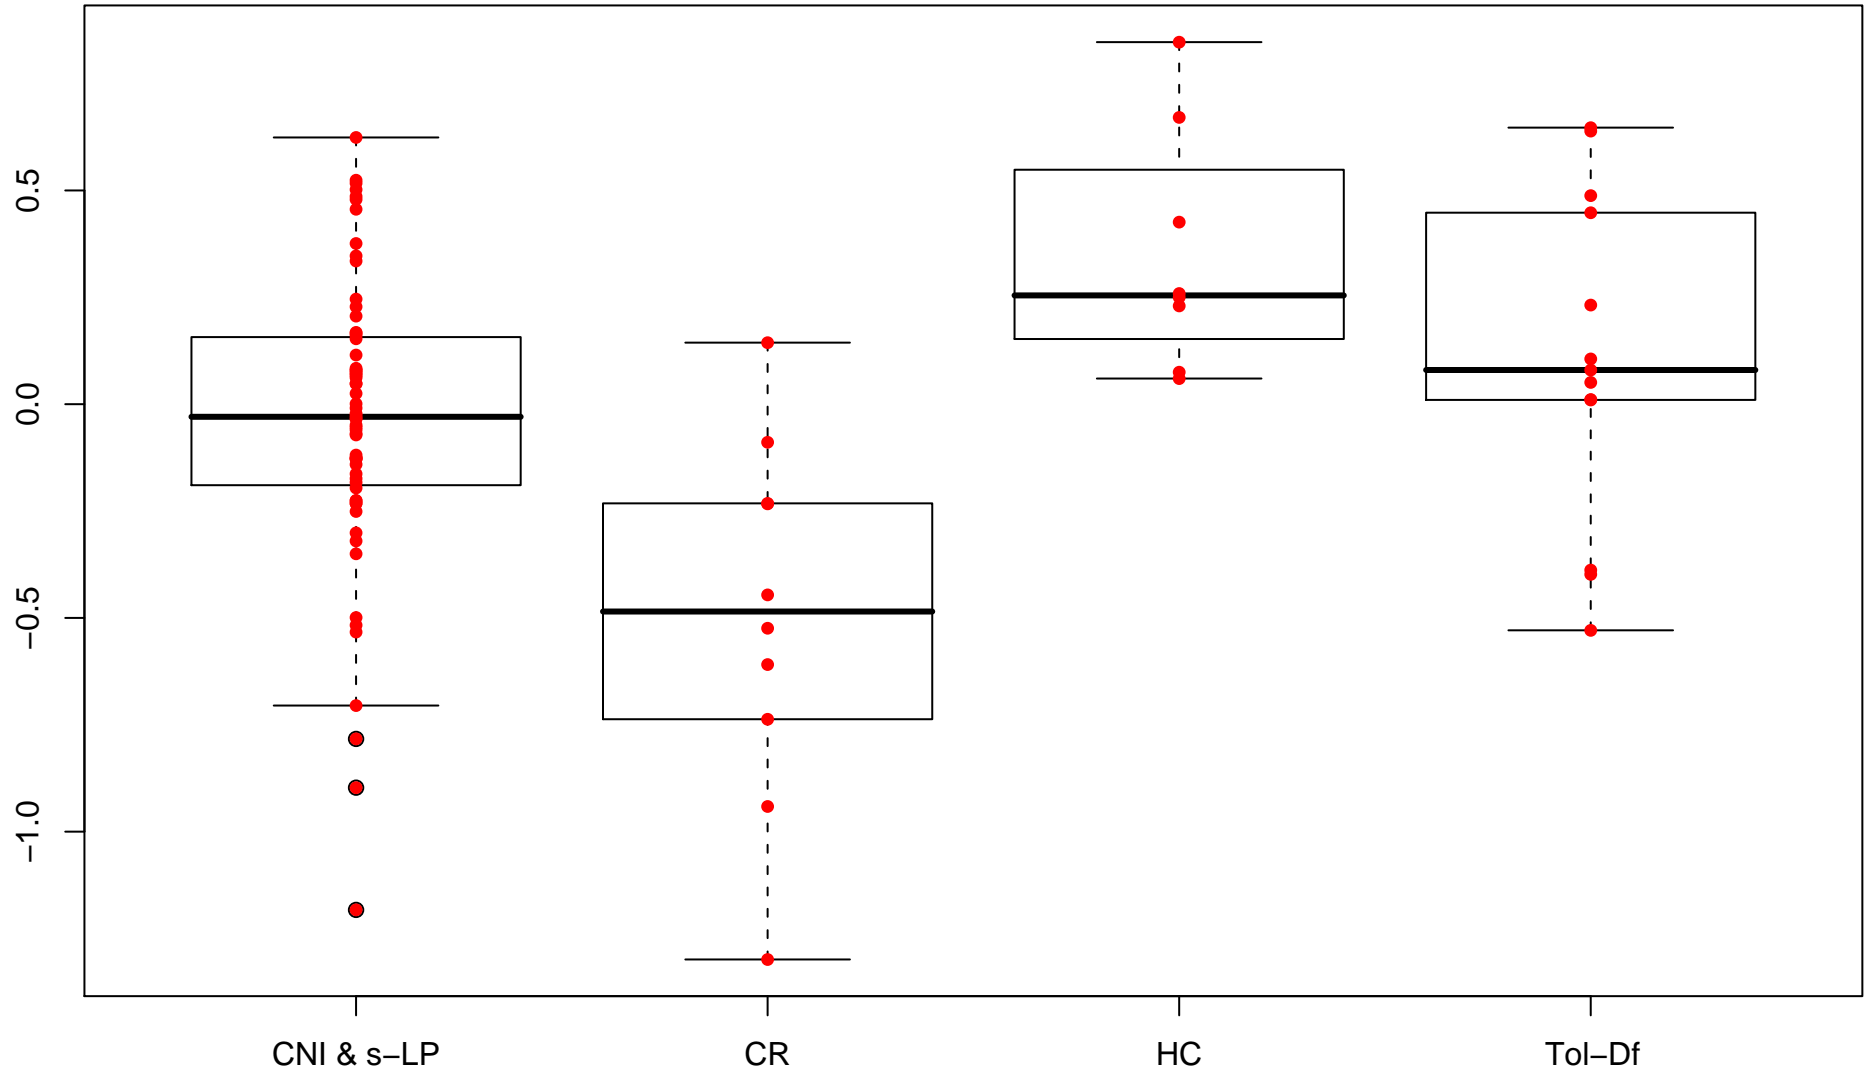

Rank 77 : STAT3  
8.345e-05

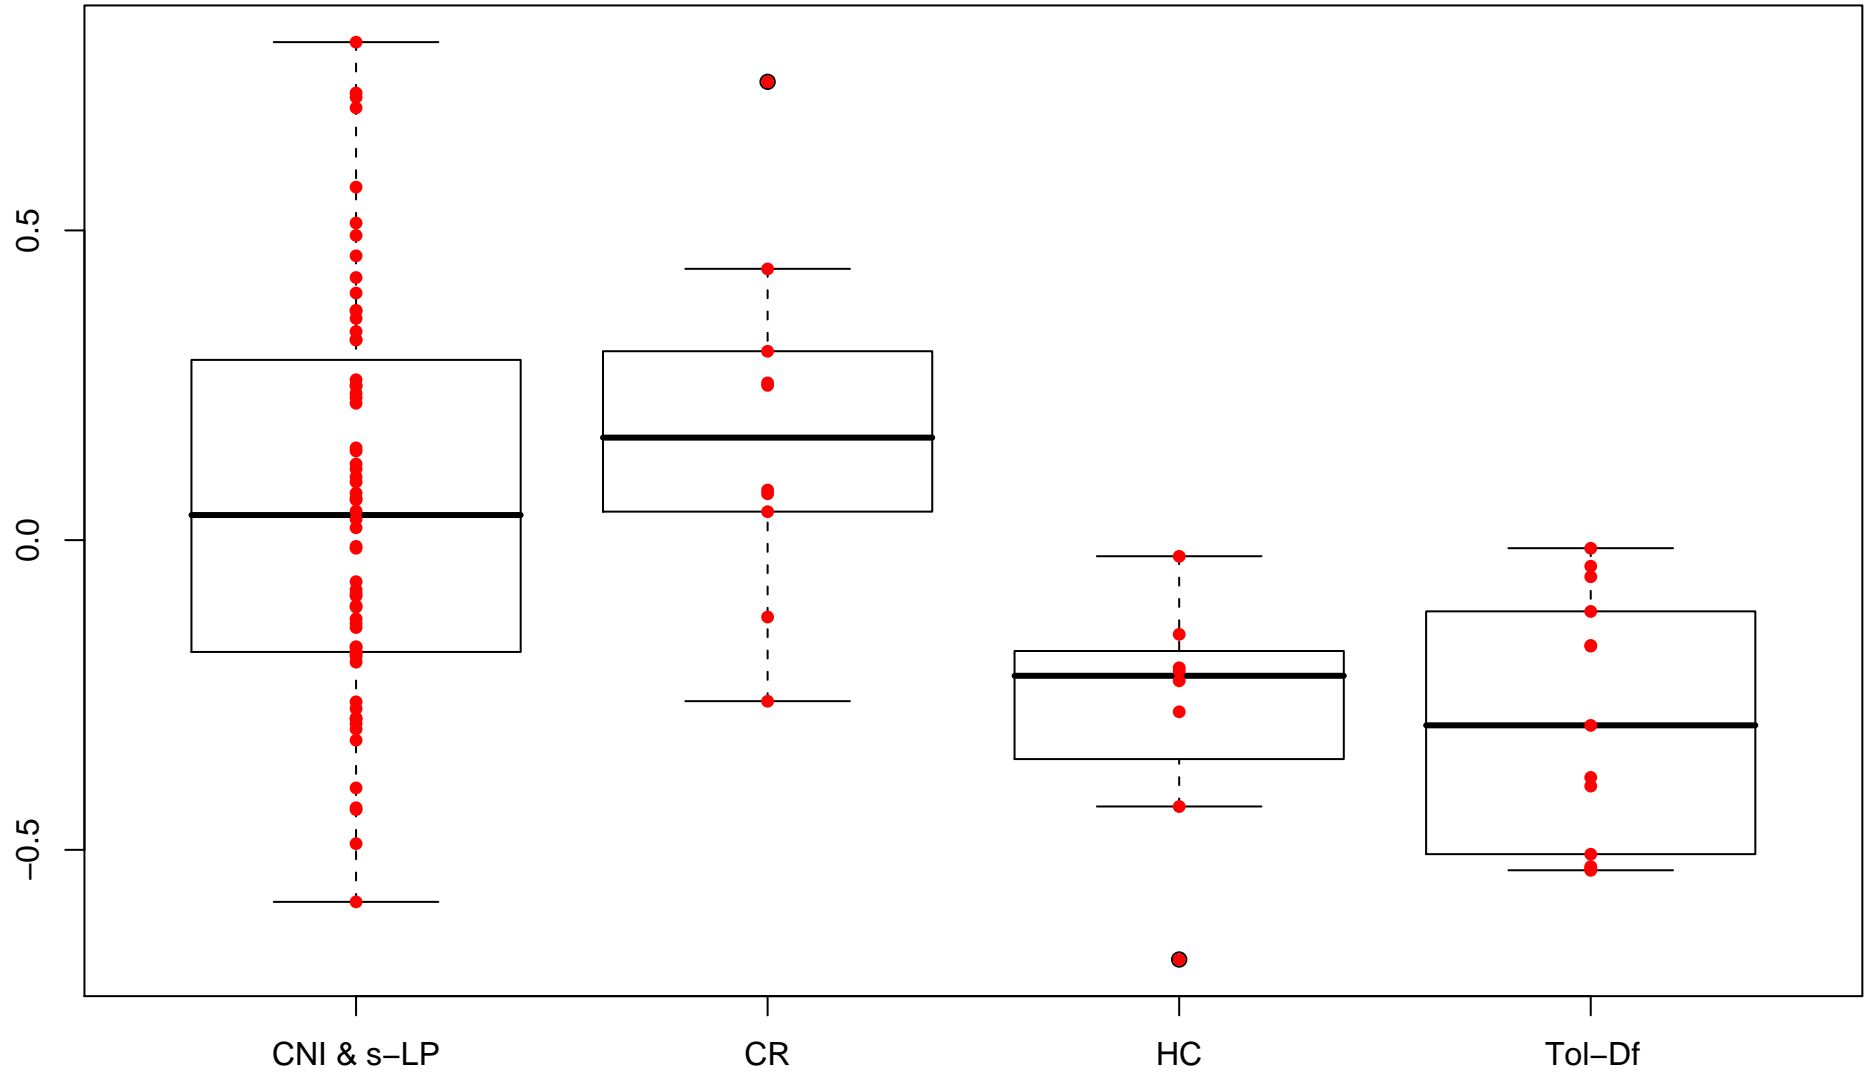

Rank 78 : SLPI  
8.534e-05

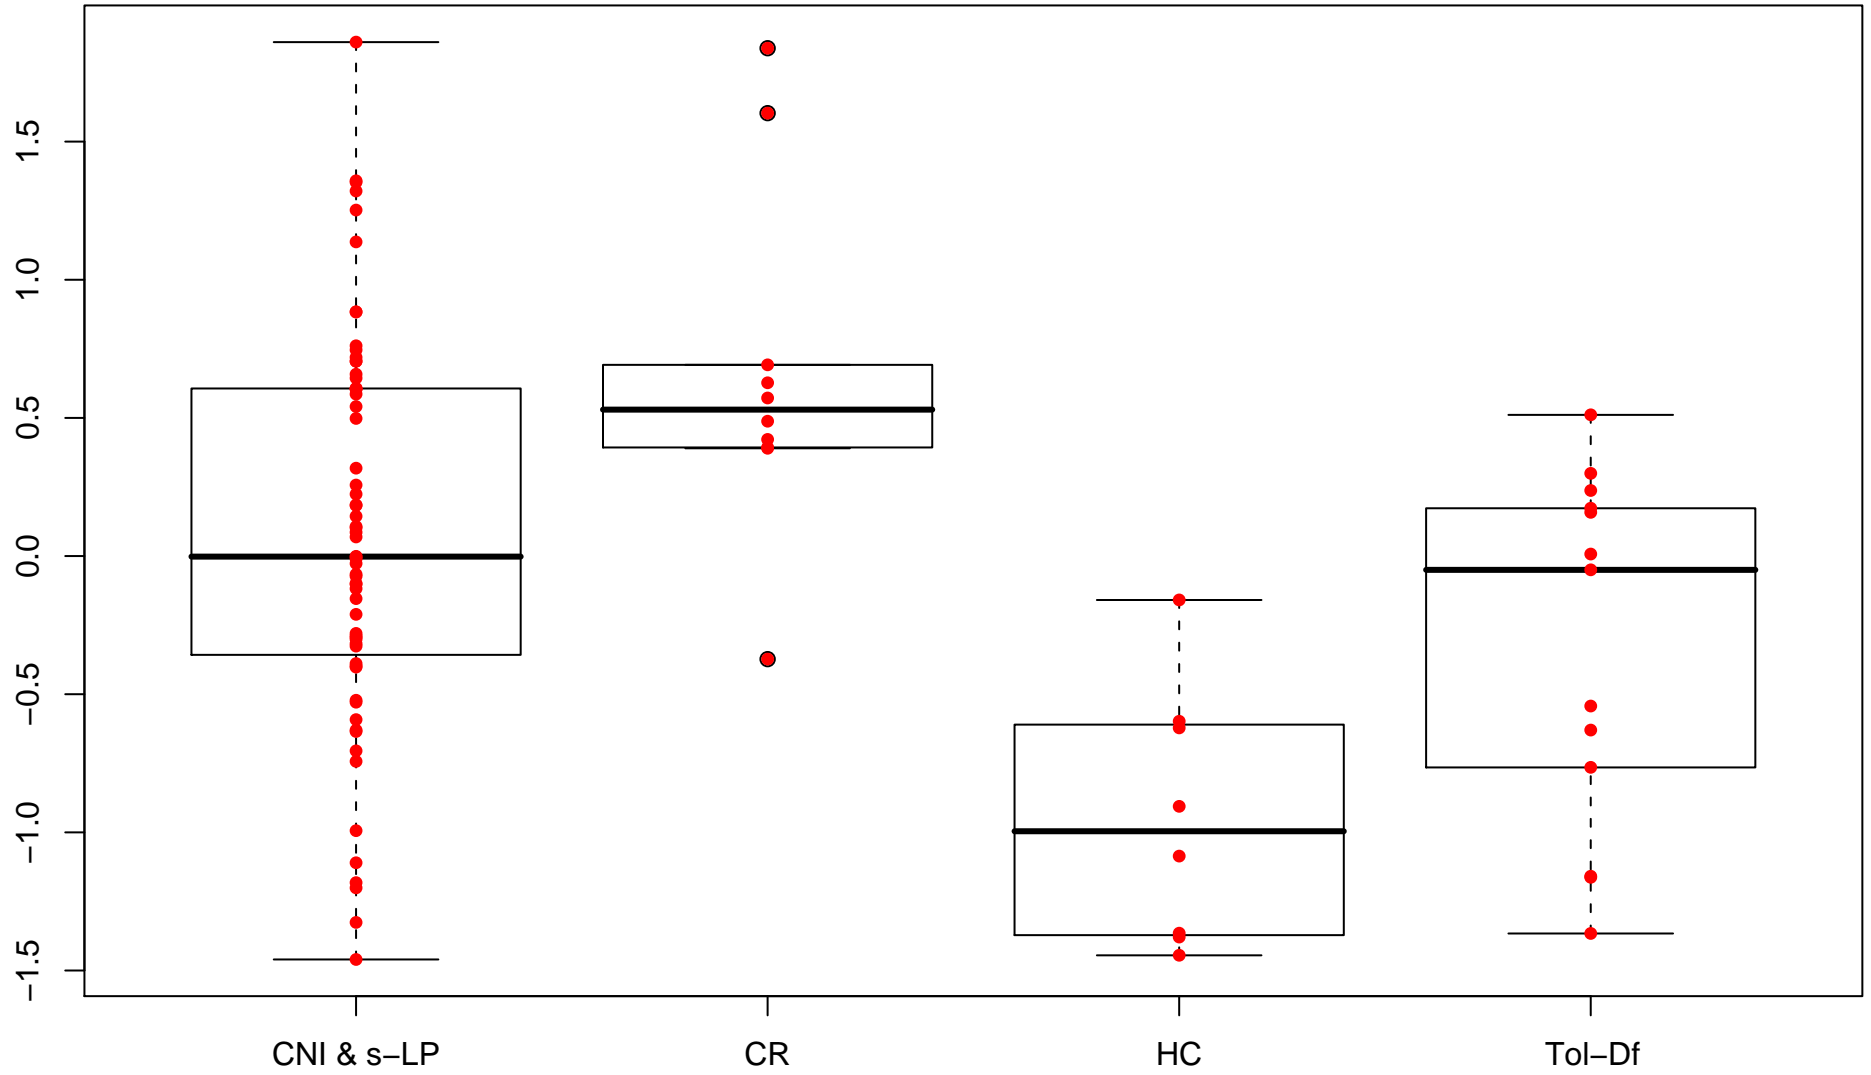

Rank 79 : NTHL1  
8.911e-05

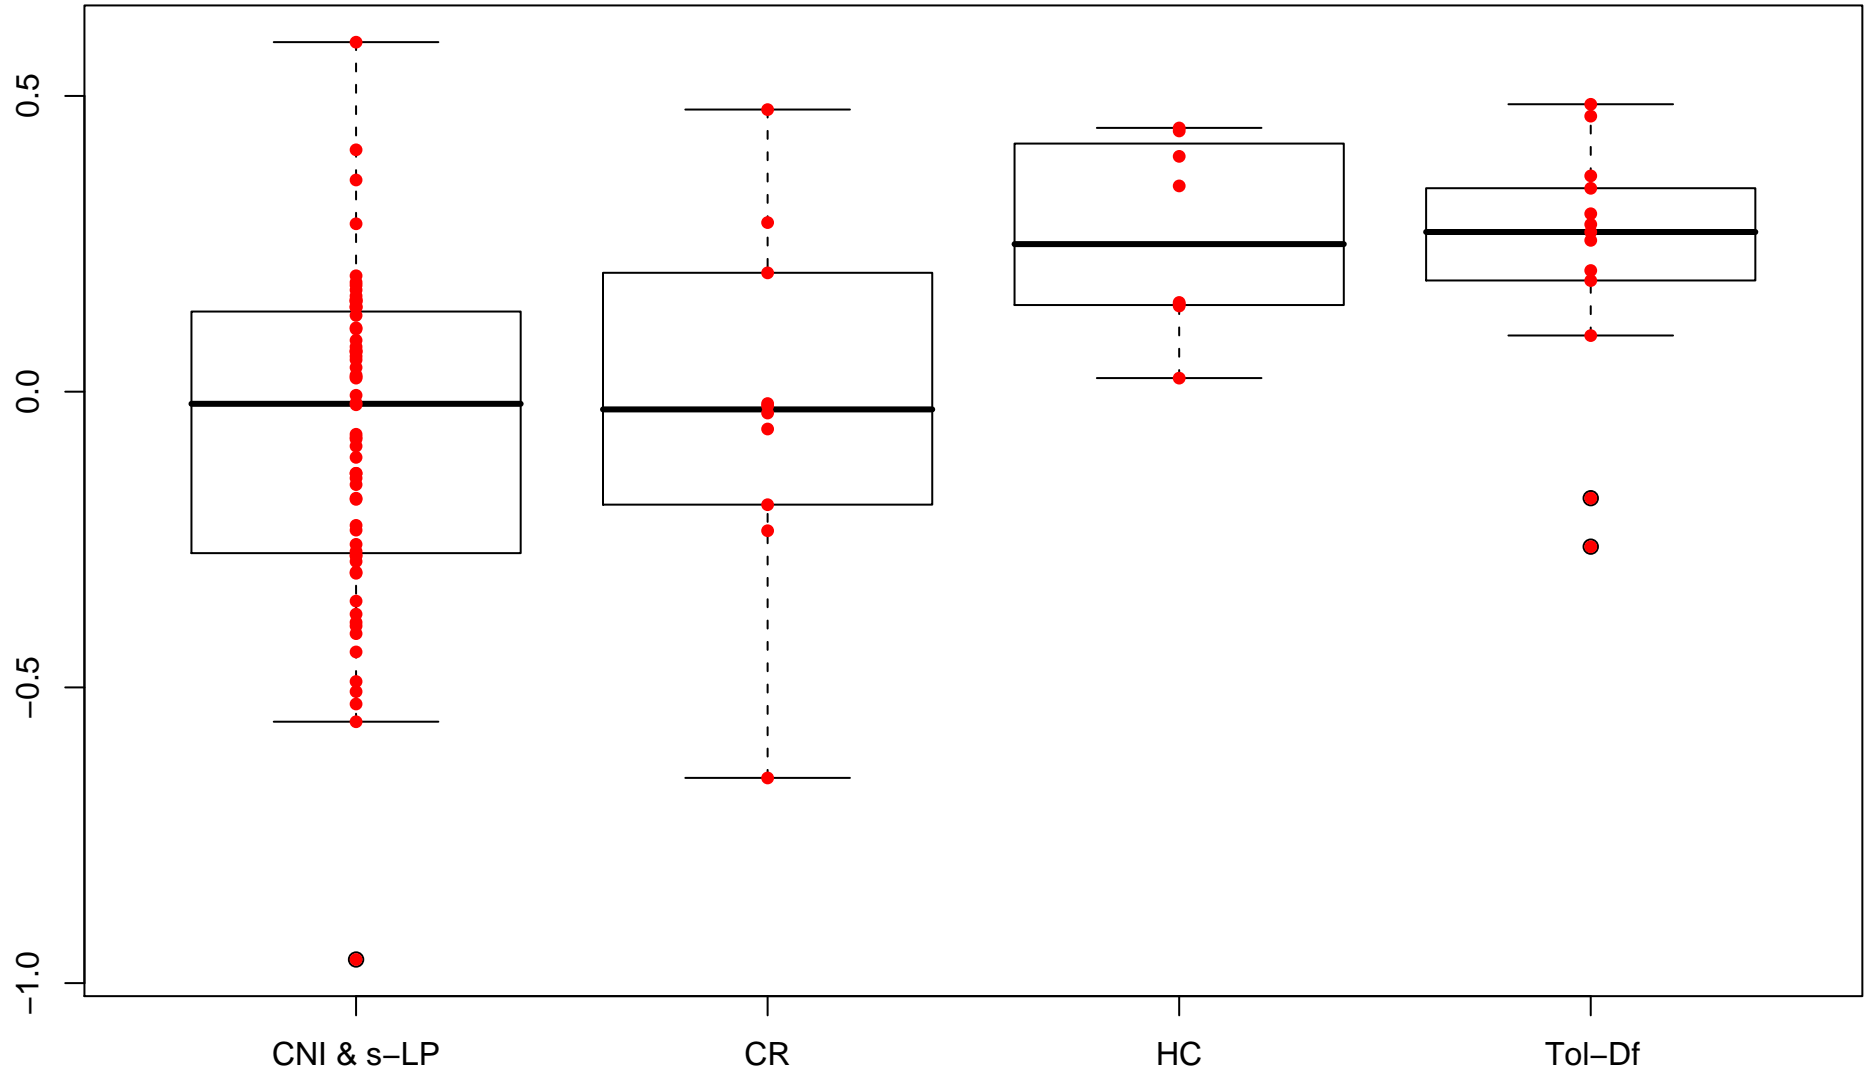

Rank 80 : CXCL5  
8.92e-05

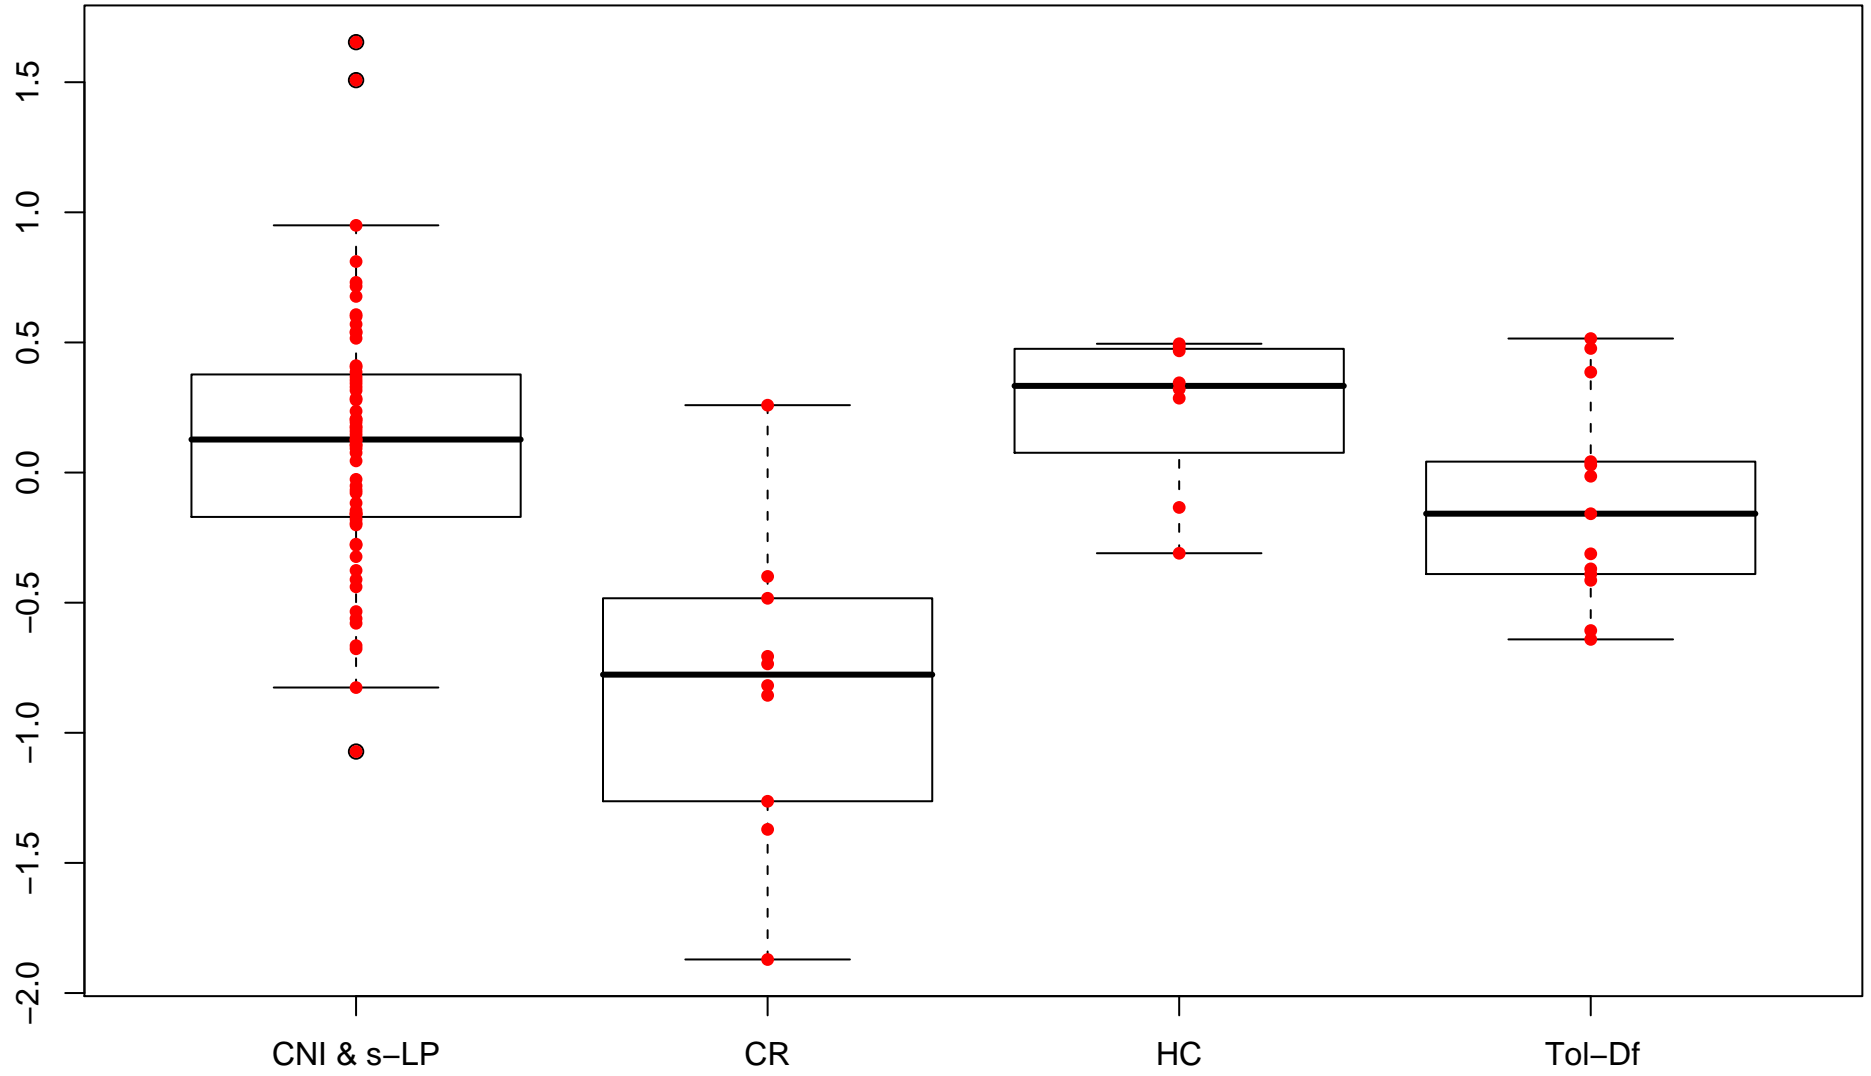

Rank 81 : RET  
9.64e-05

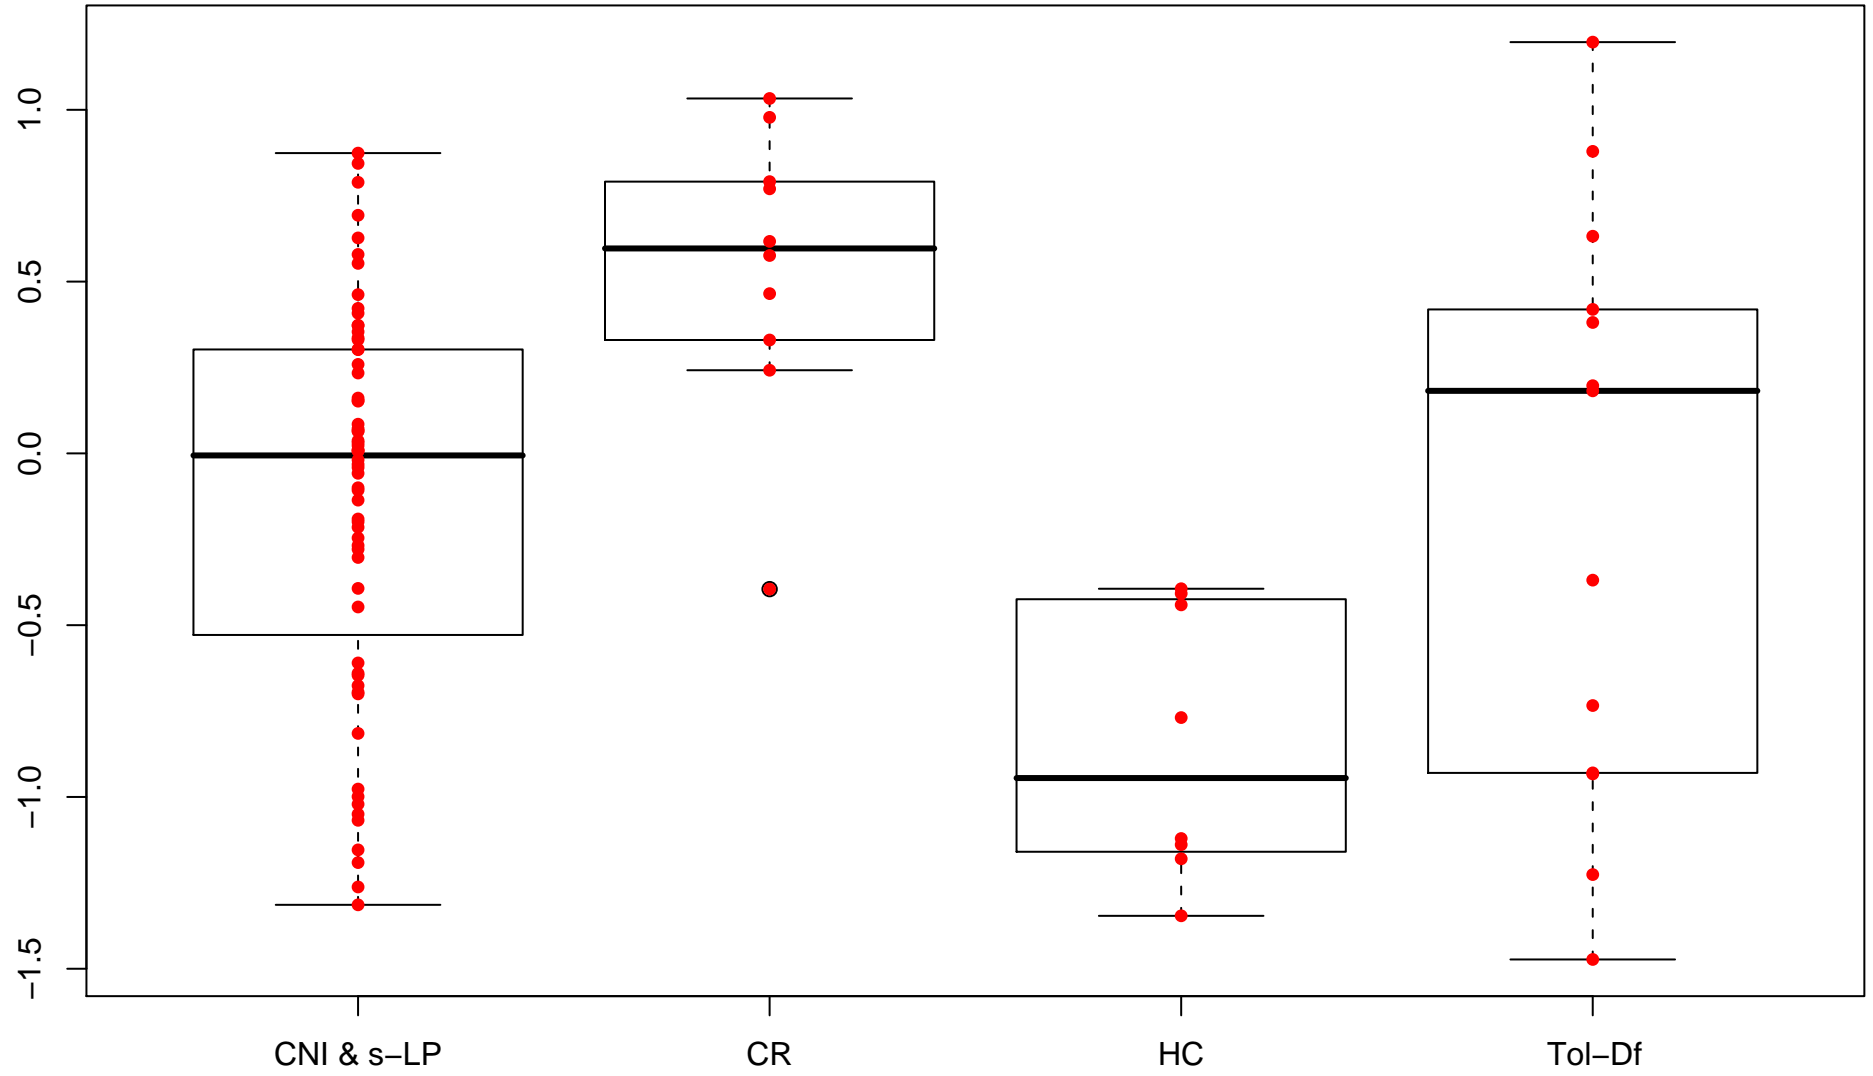

Rank 82 : GPR84  
0.00010047

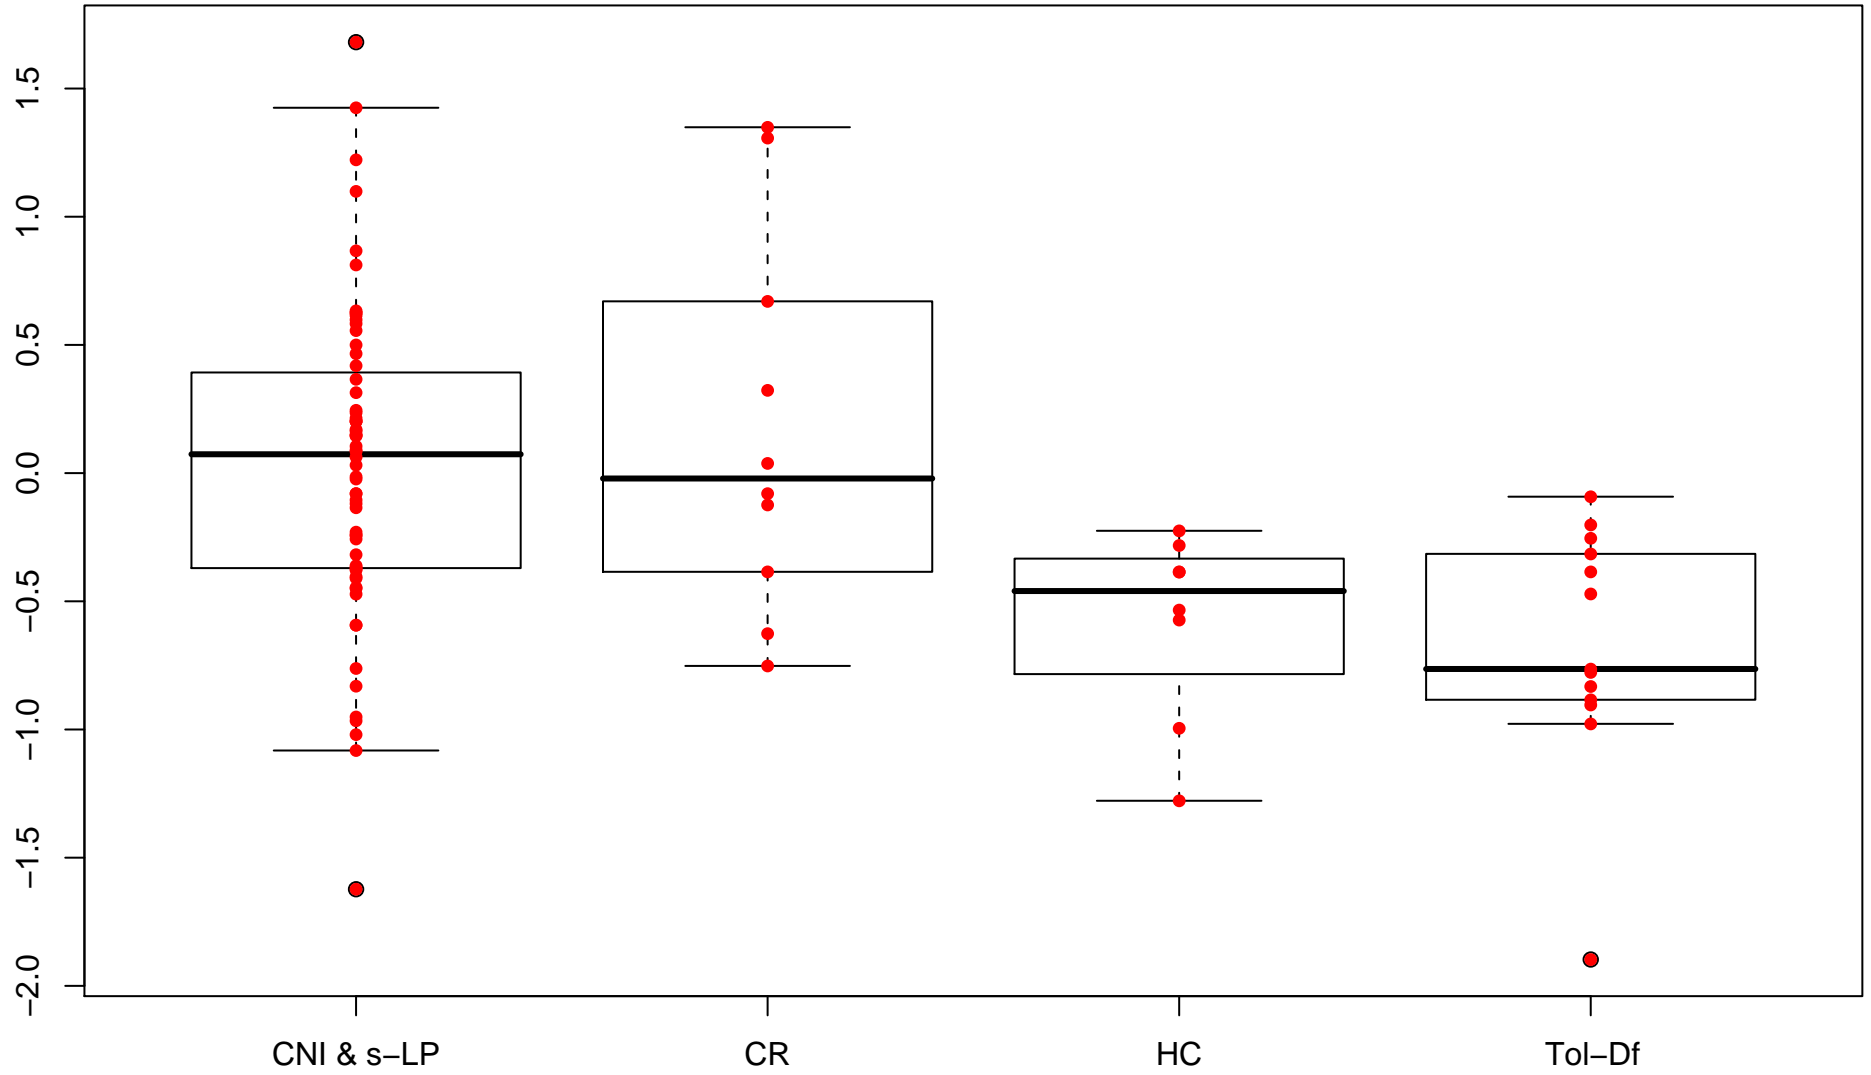



Rank 83 : ITK  
0.0001015

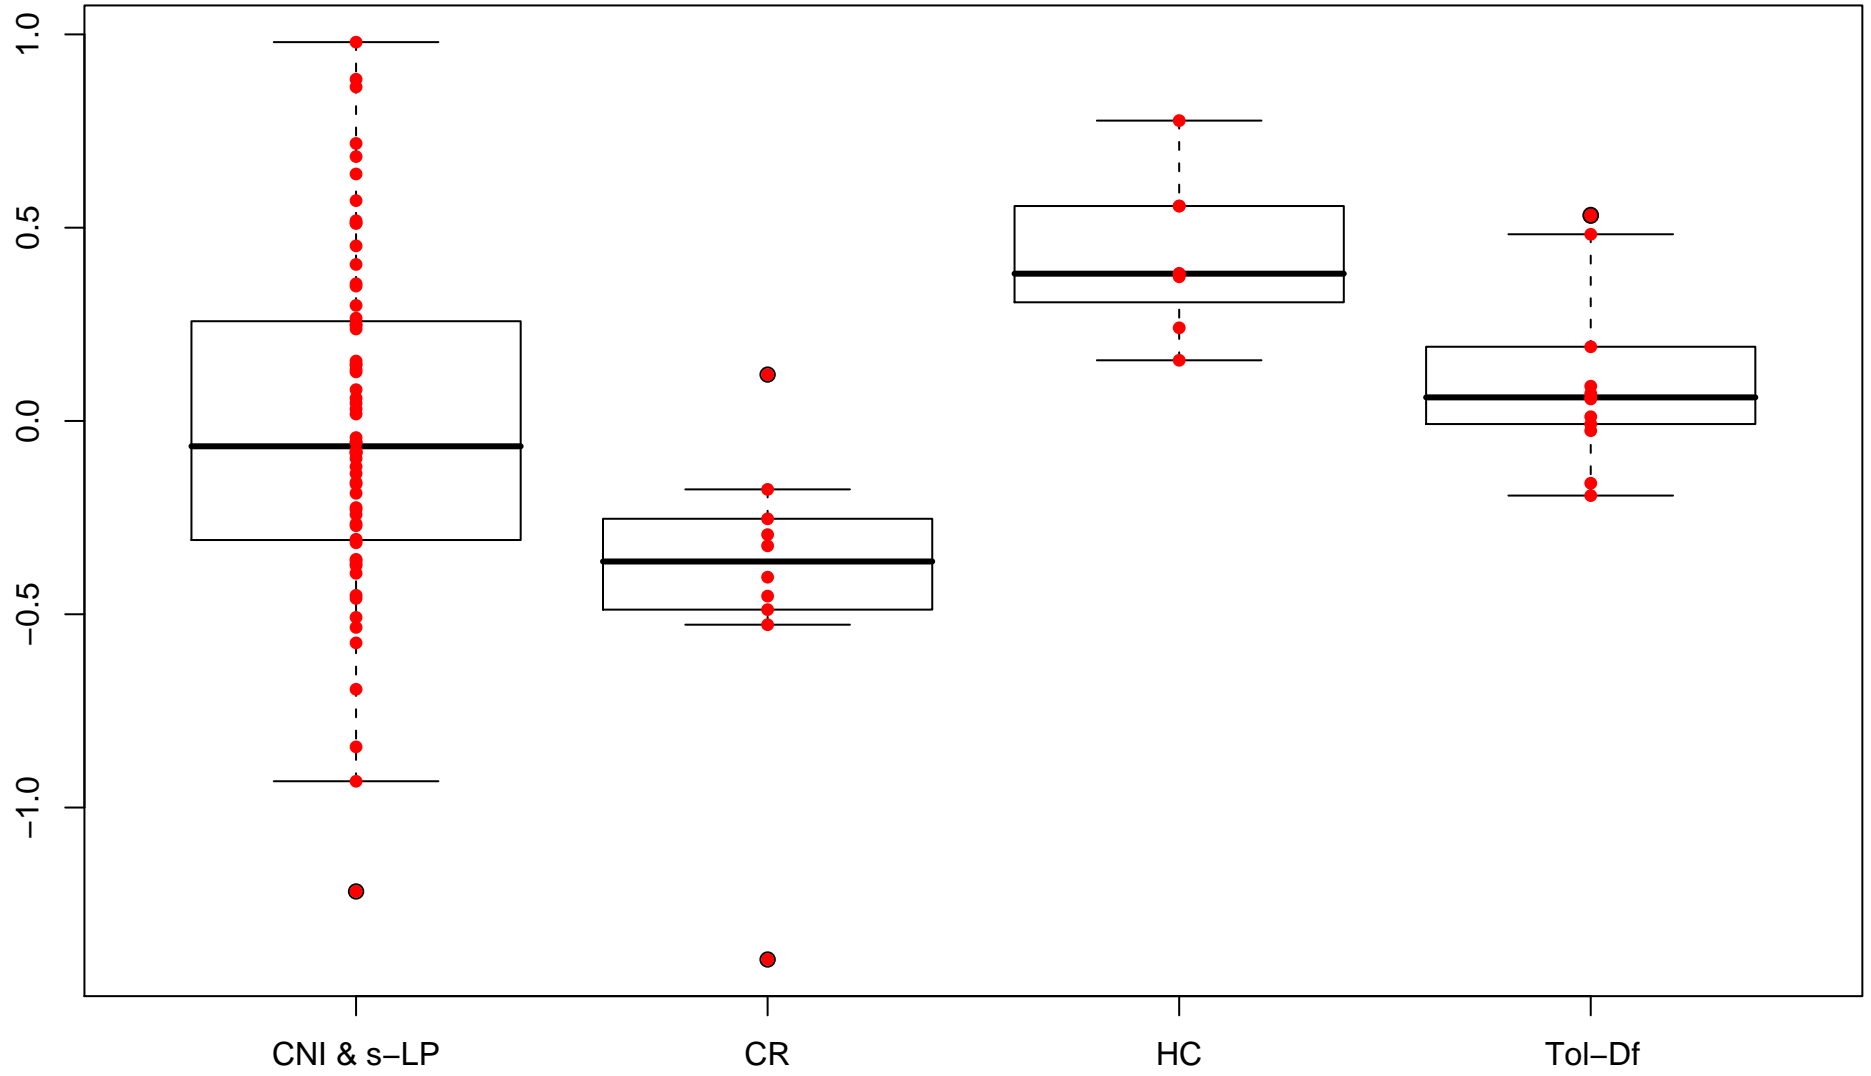

Rank 84 : AIM2  
0.00010612

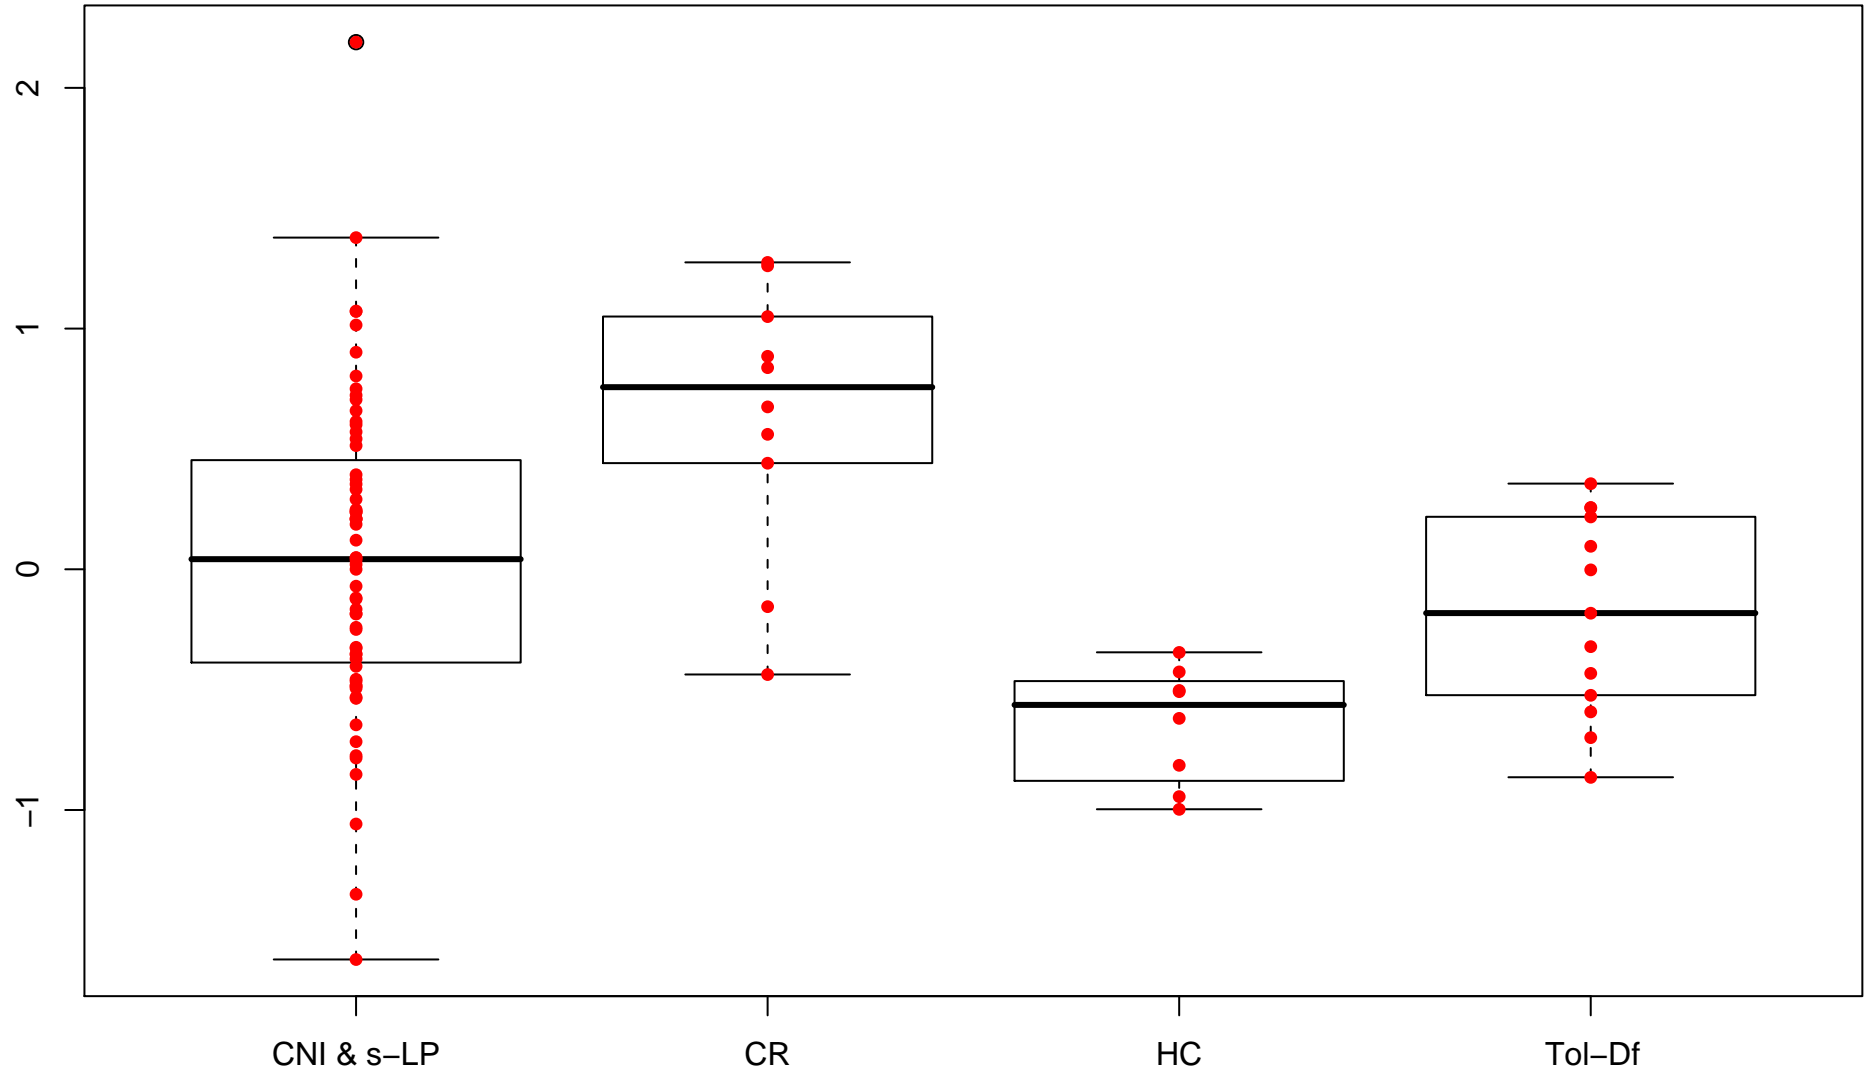

Rank 85 : NCOA1  
0.00011667

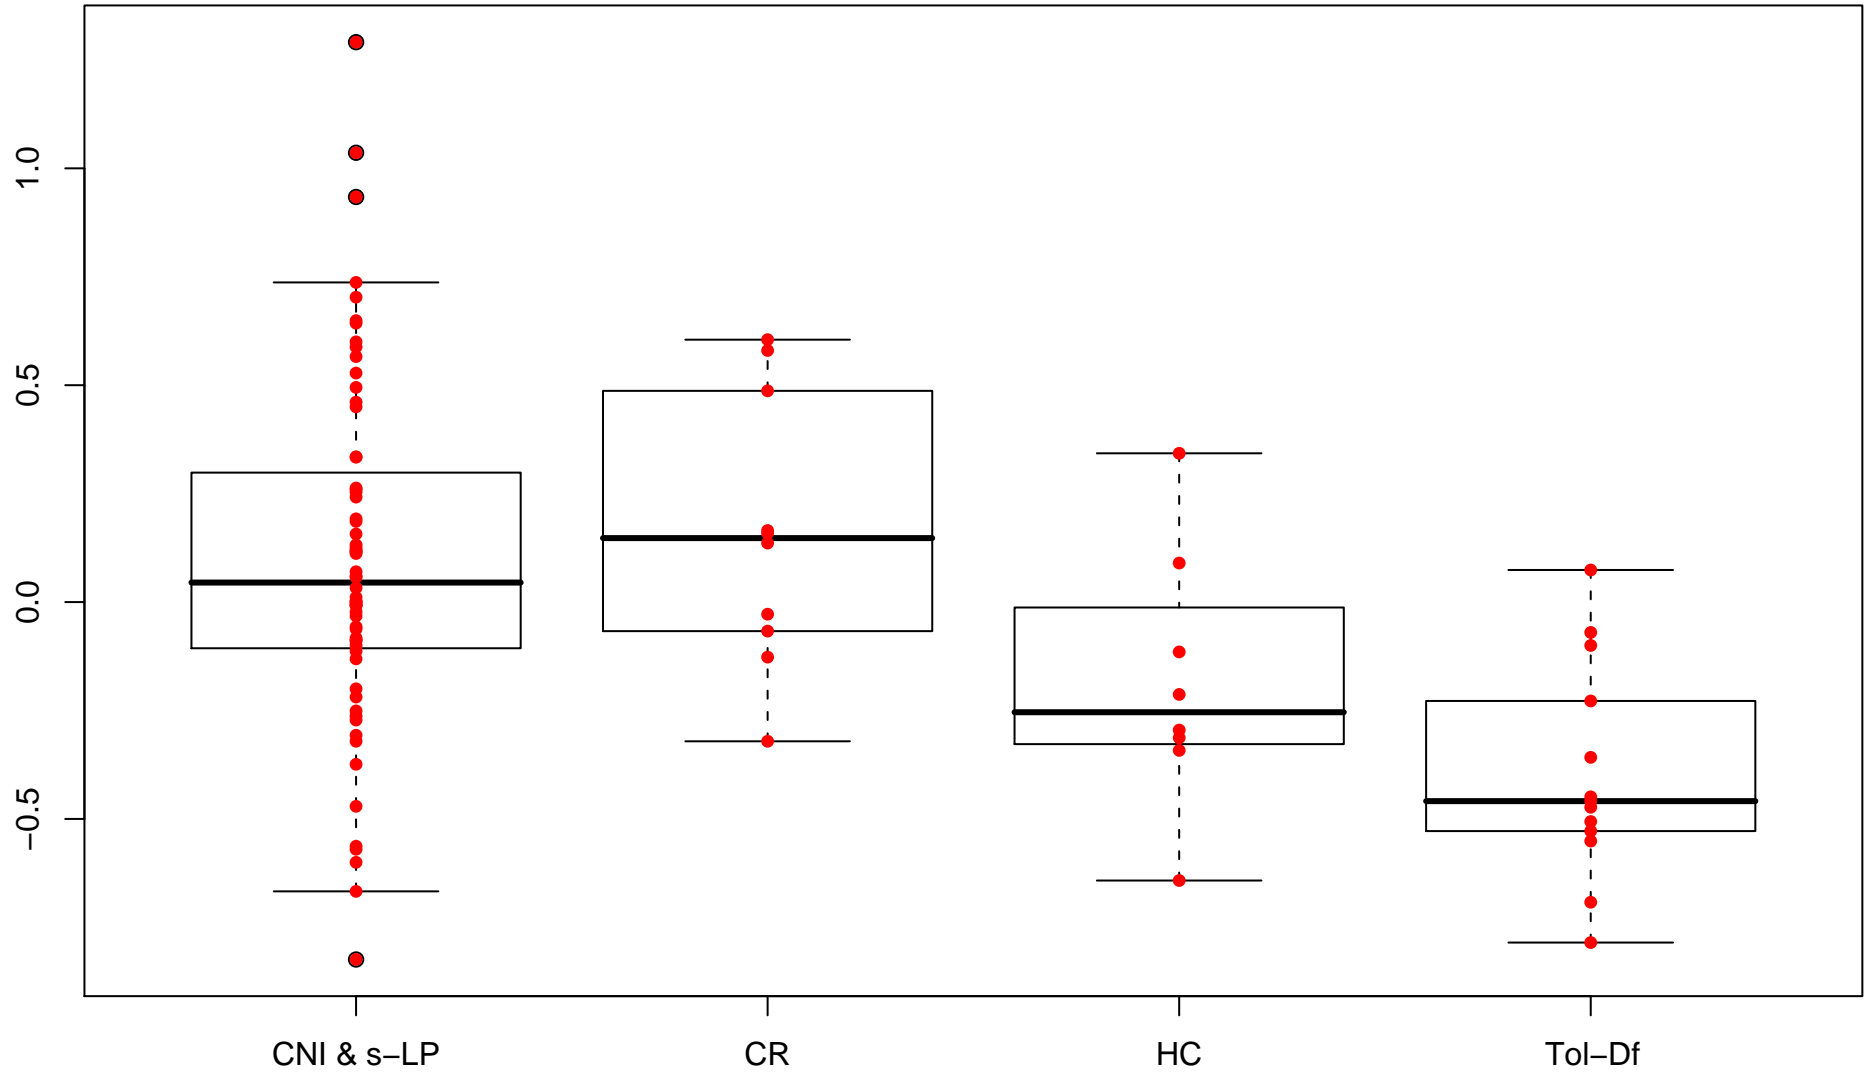

Rank 86 : LOC145474  
0.00011707

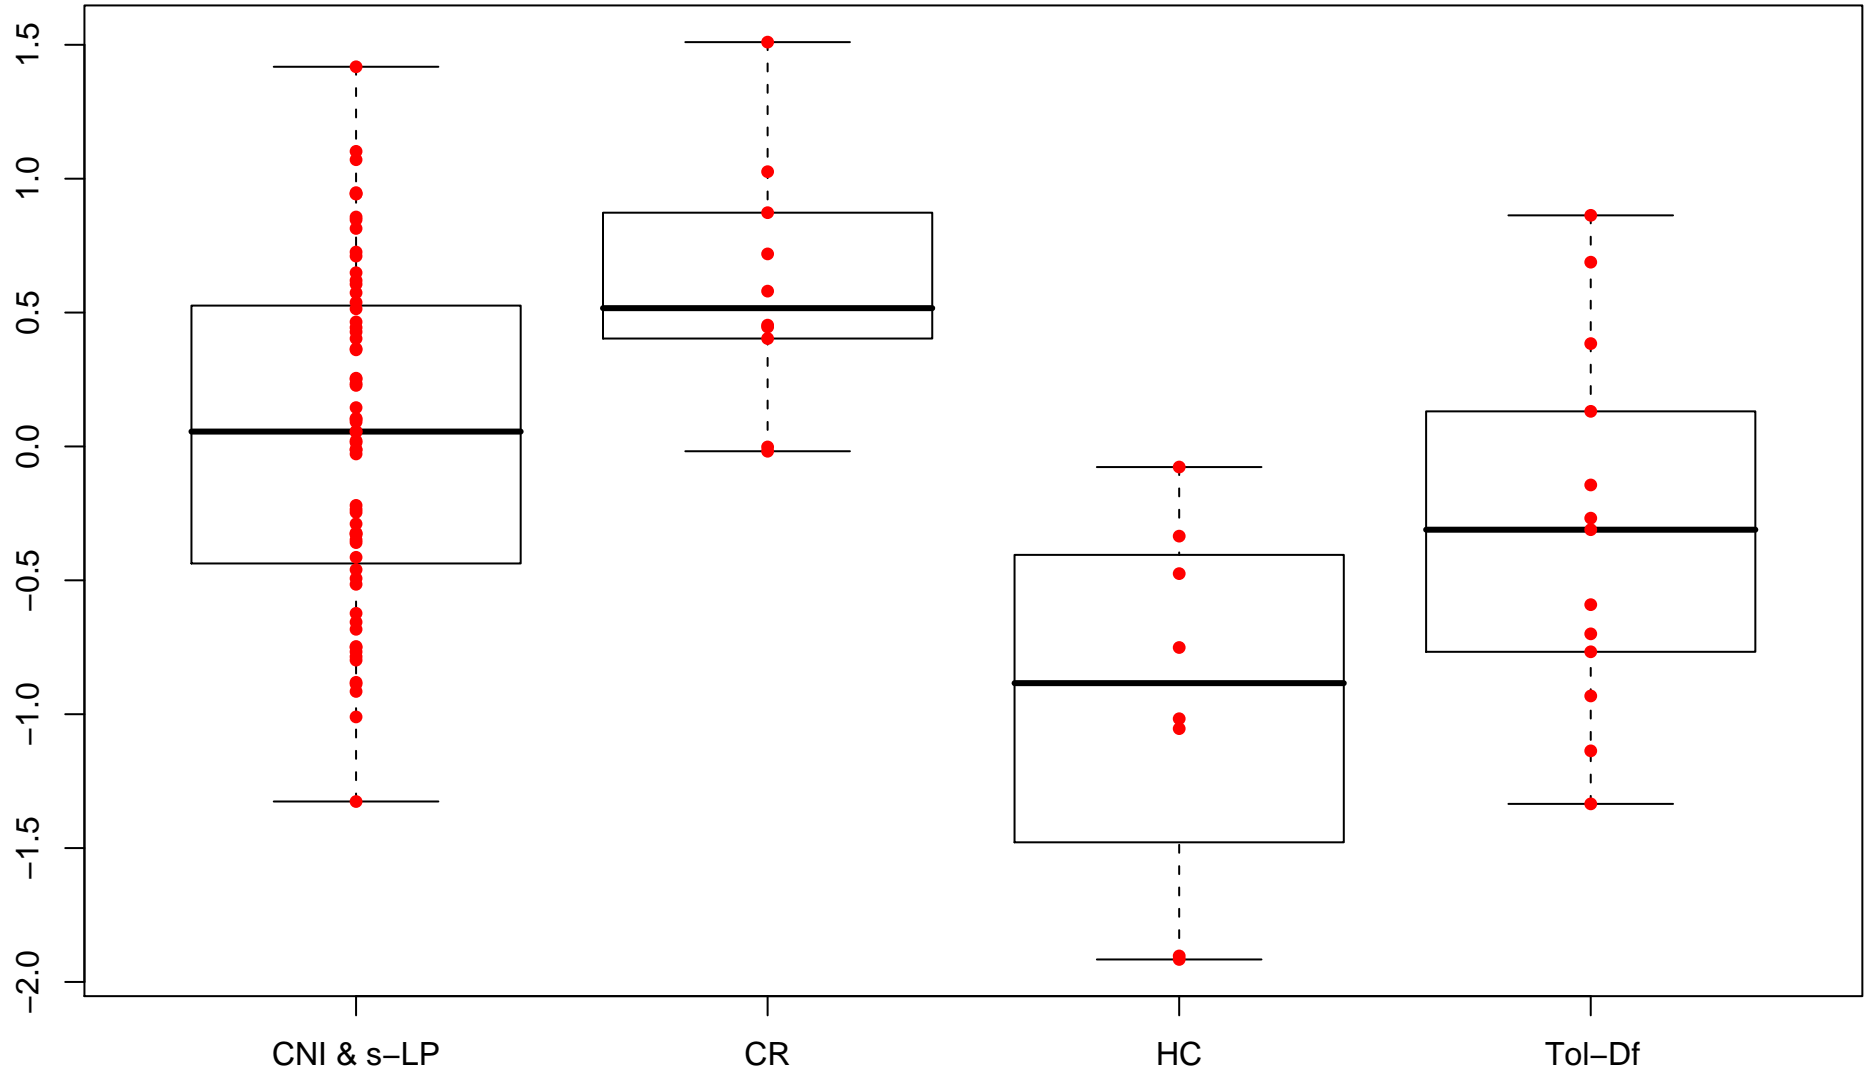

Rank 87 : TNFAIP8  
0.00011875

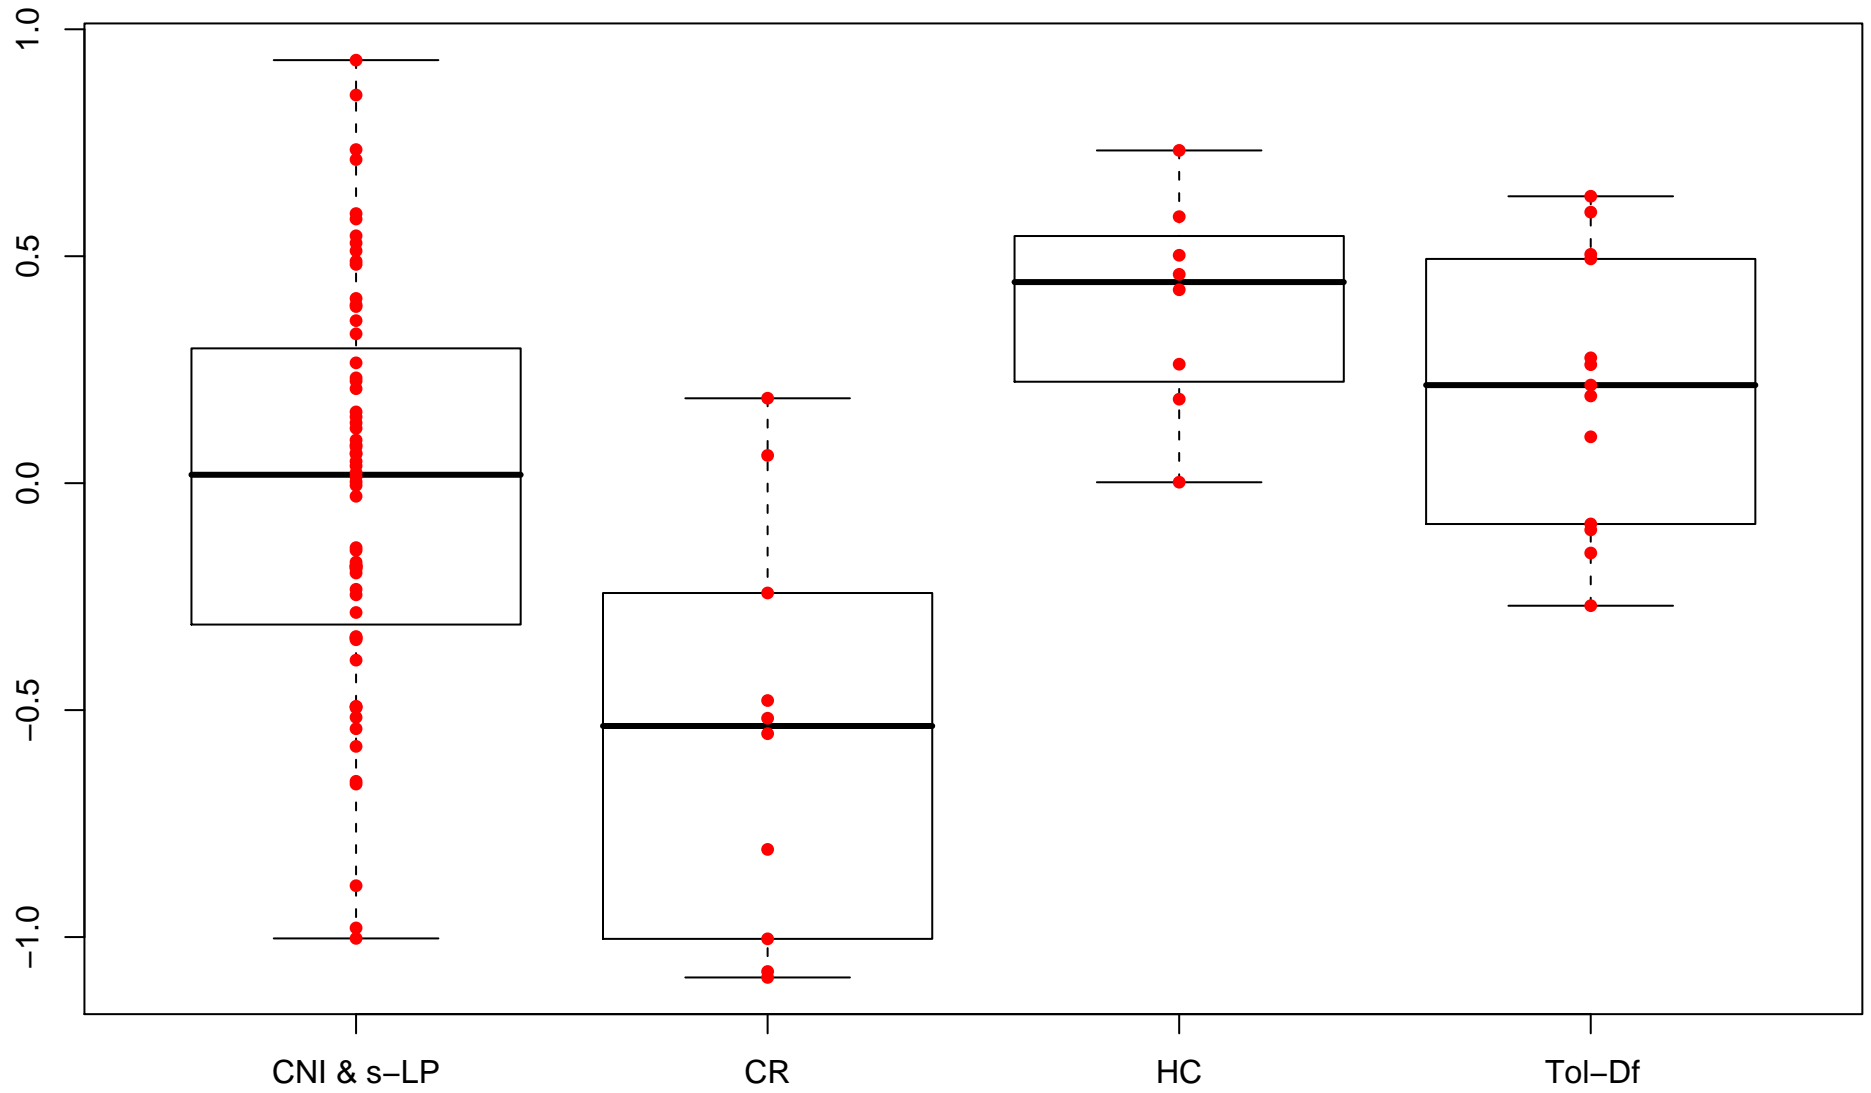

Rank 88 : ENOX2  
0.0001879

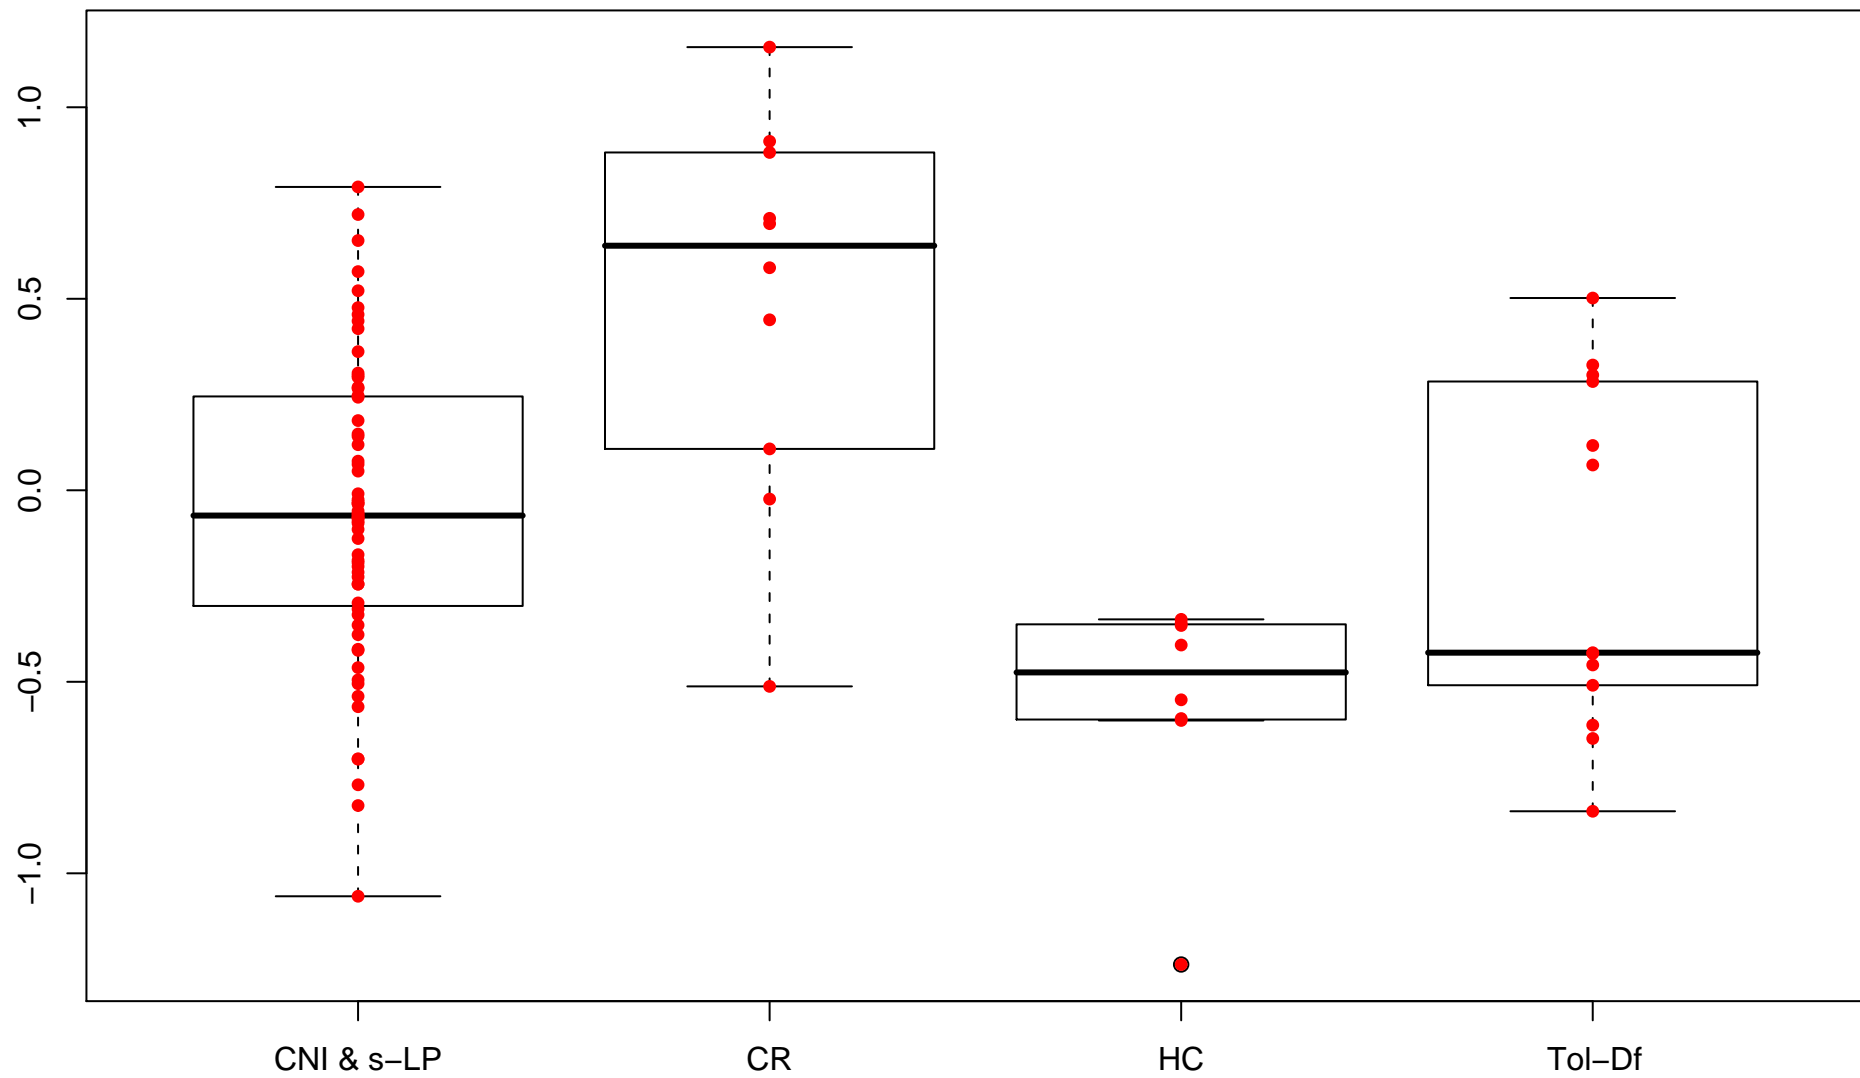

Rank 89 : FSTL3  
0.00011967

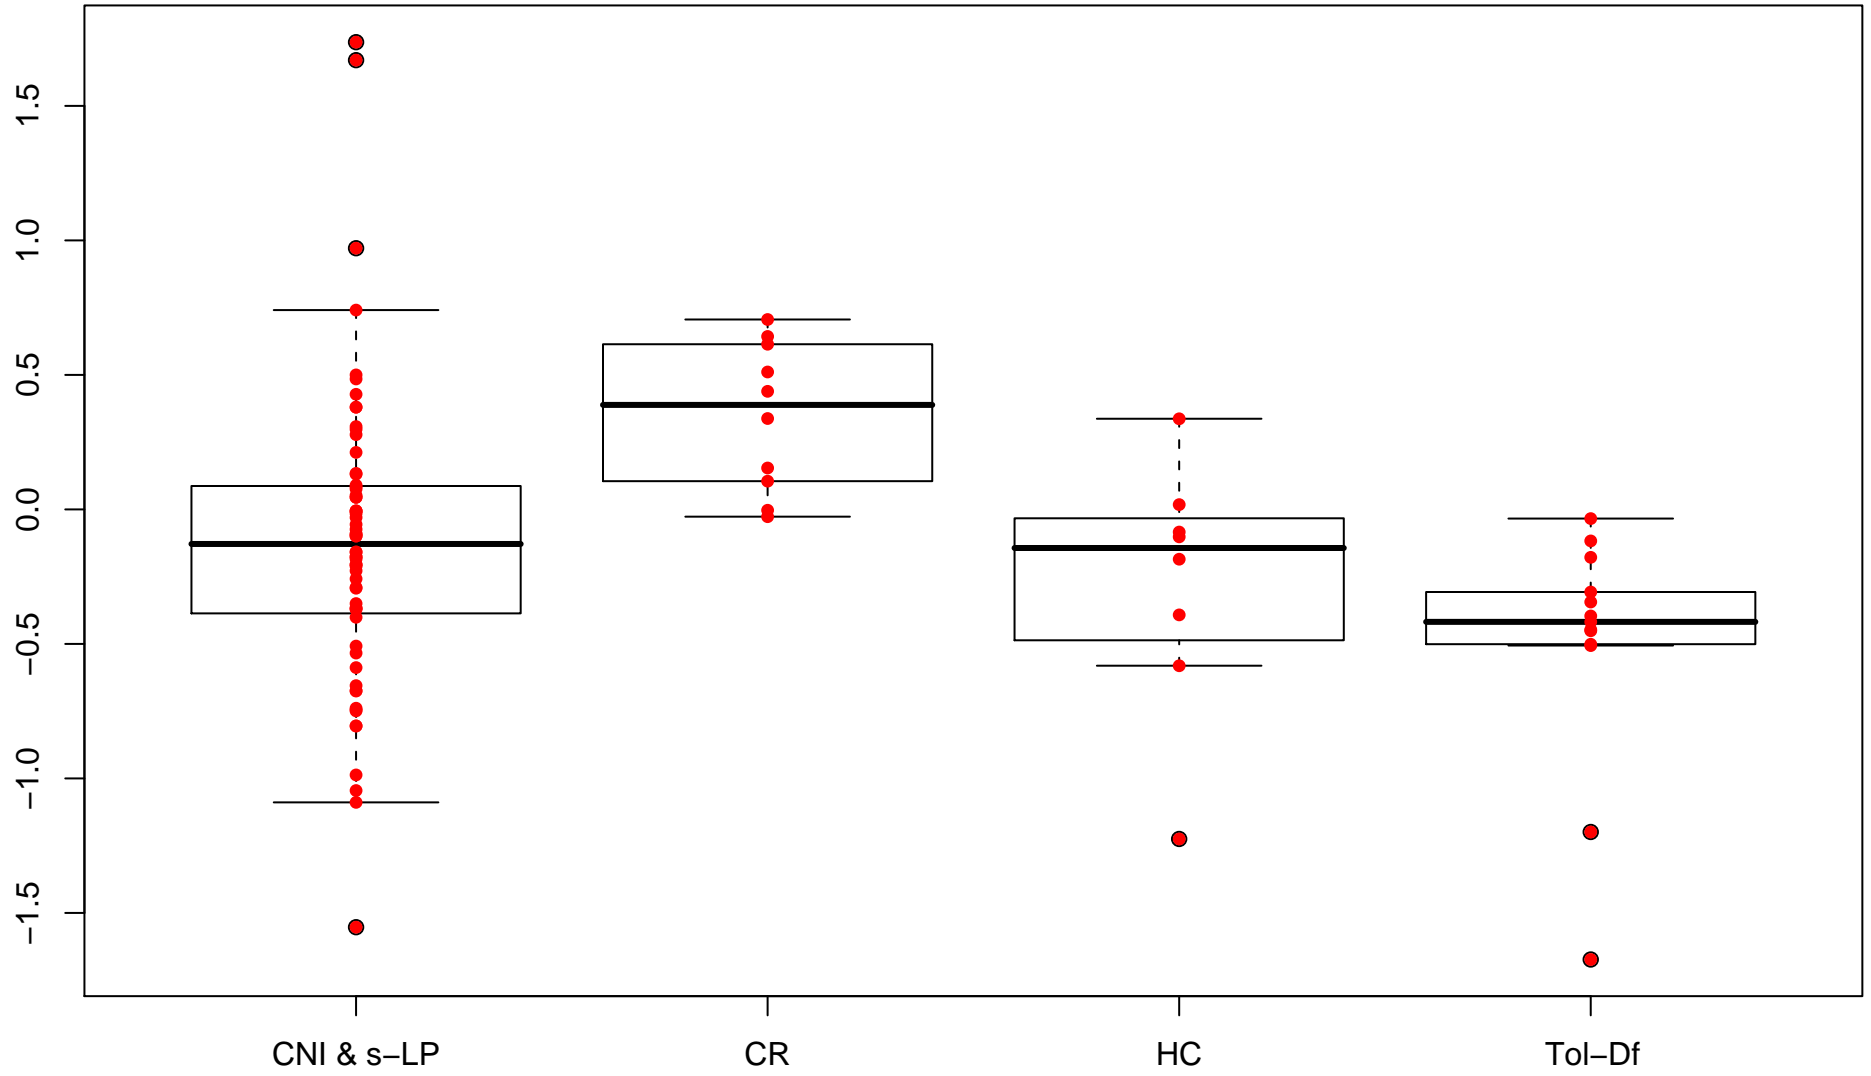

Rank 90 : FAM13A1  
0.00012517

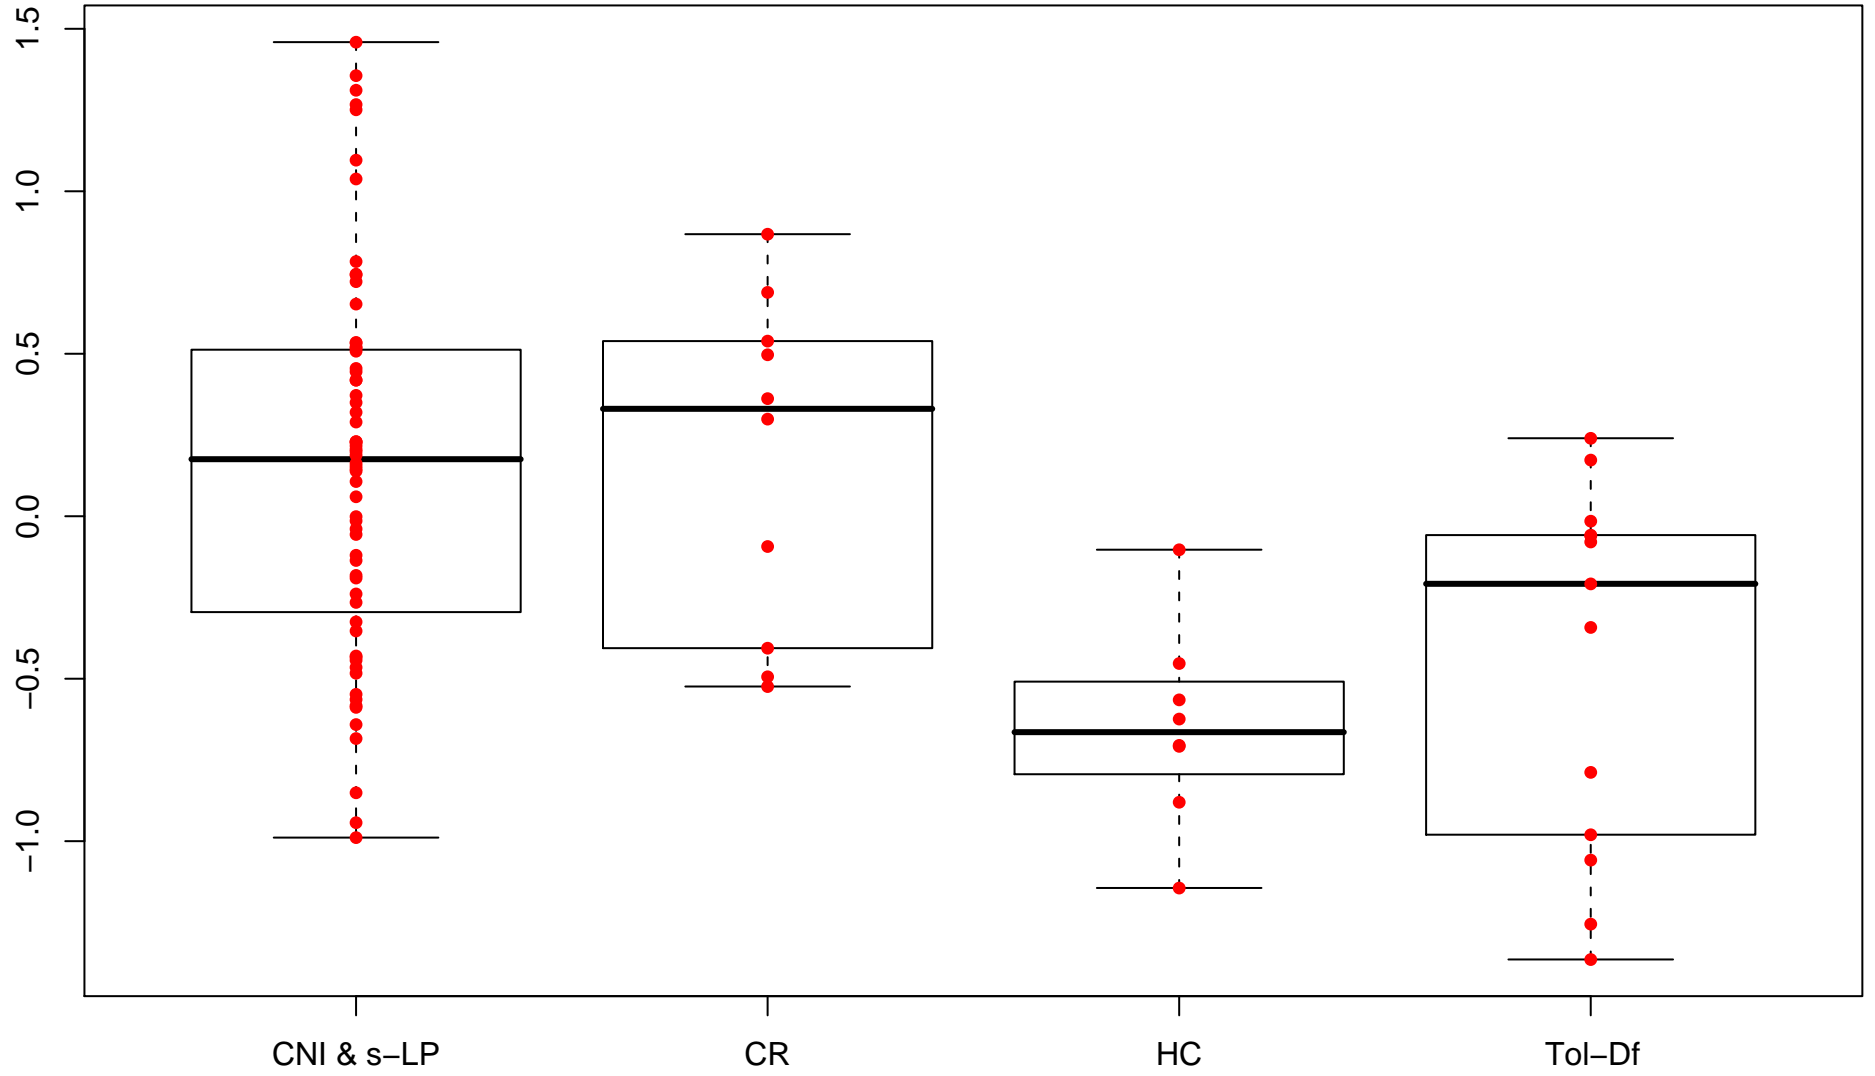



Rank 91 : KCNJ2  
0.00012889

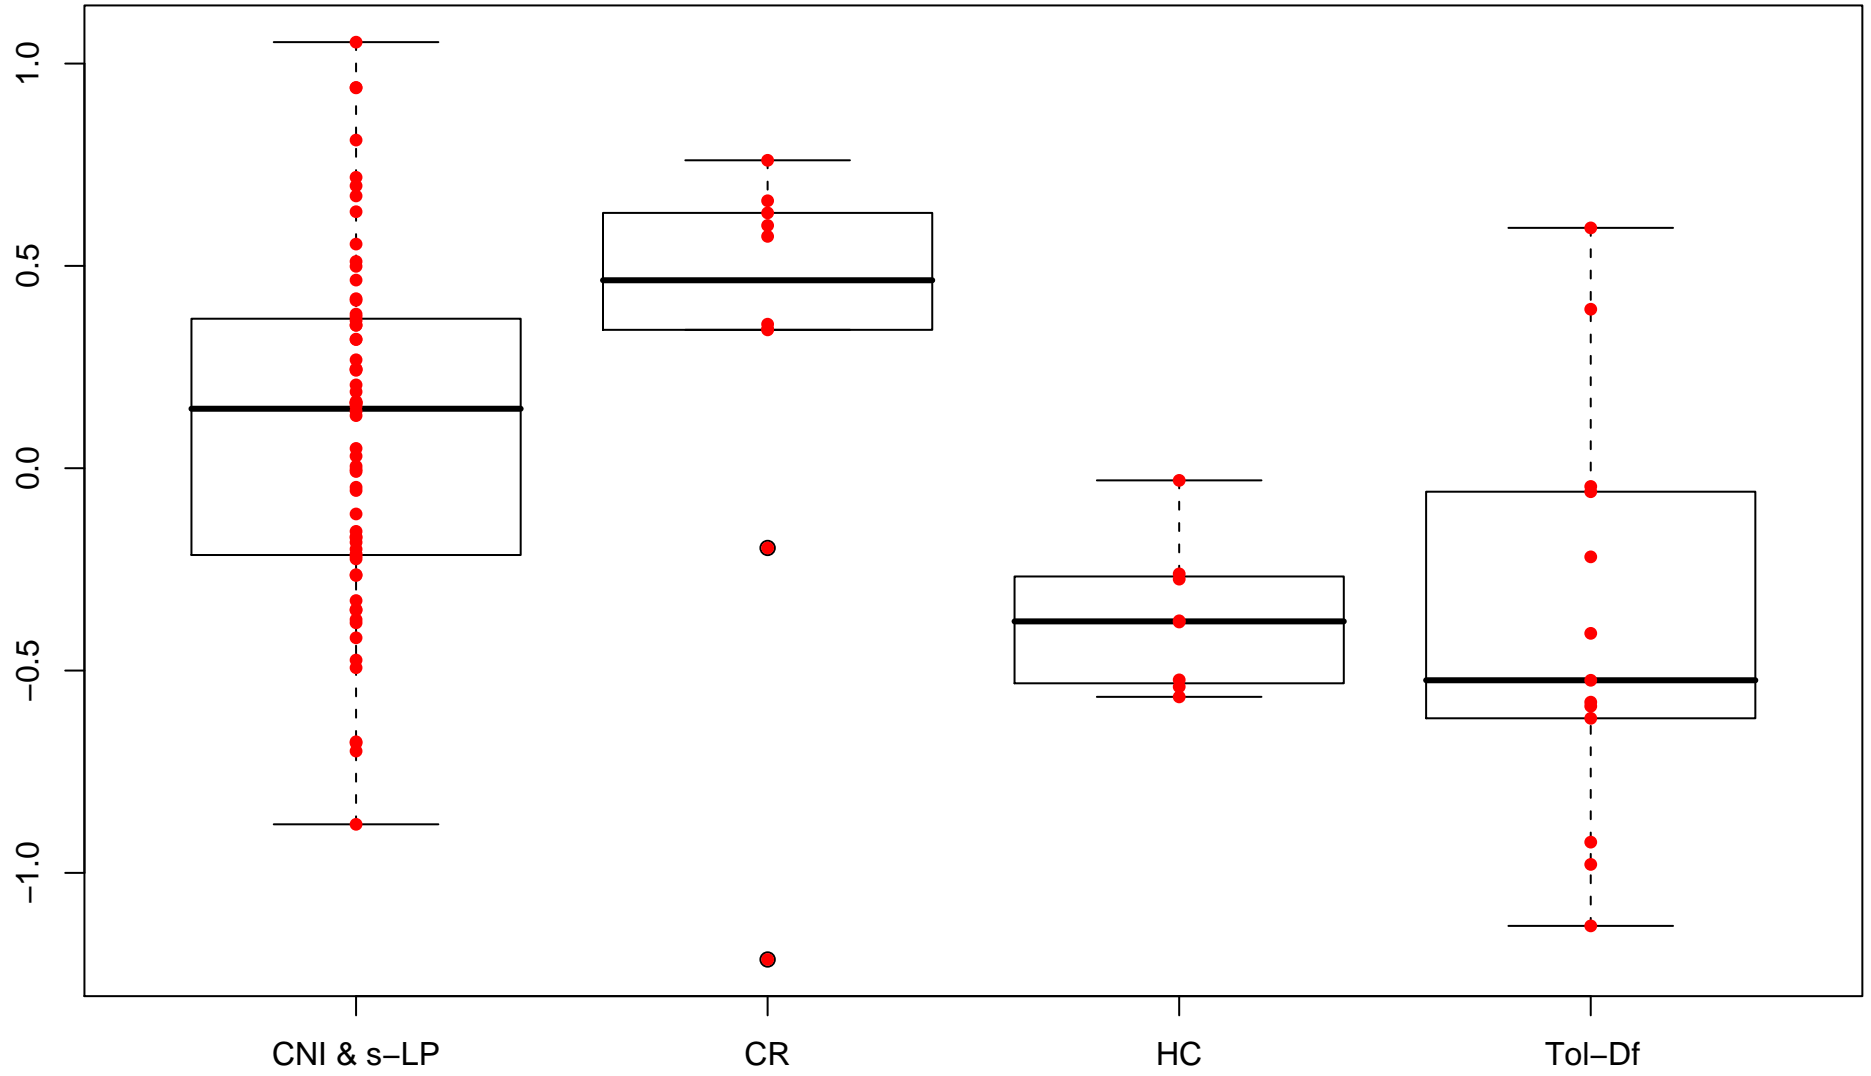

Rank 92 : BNIP3  
0.00013136

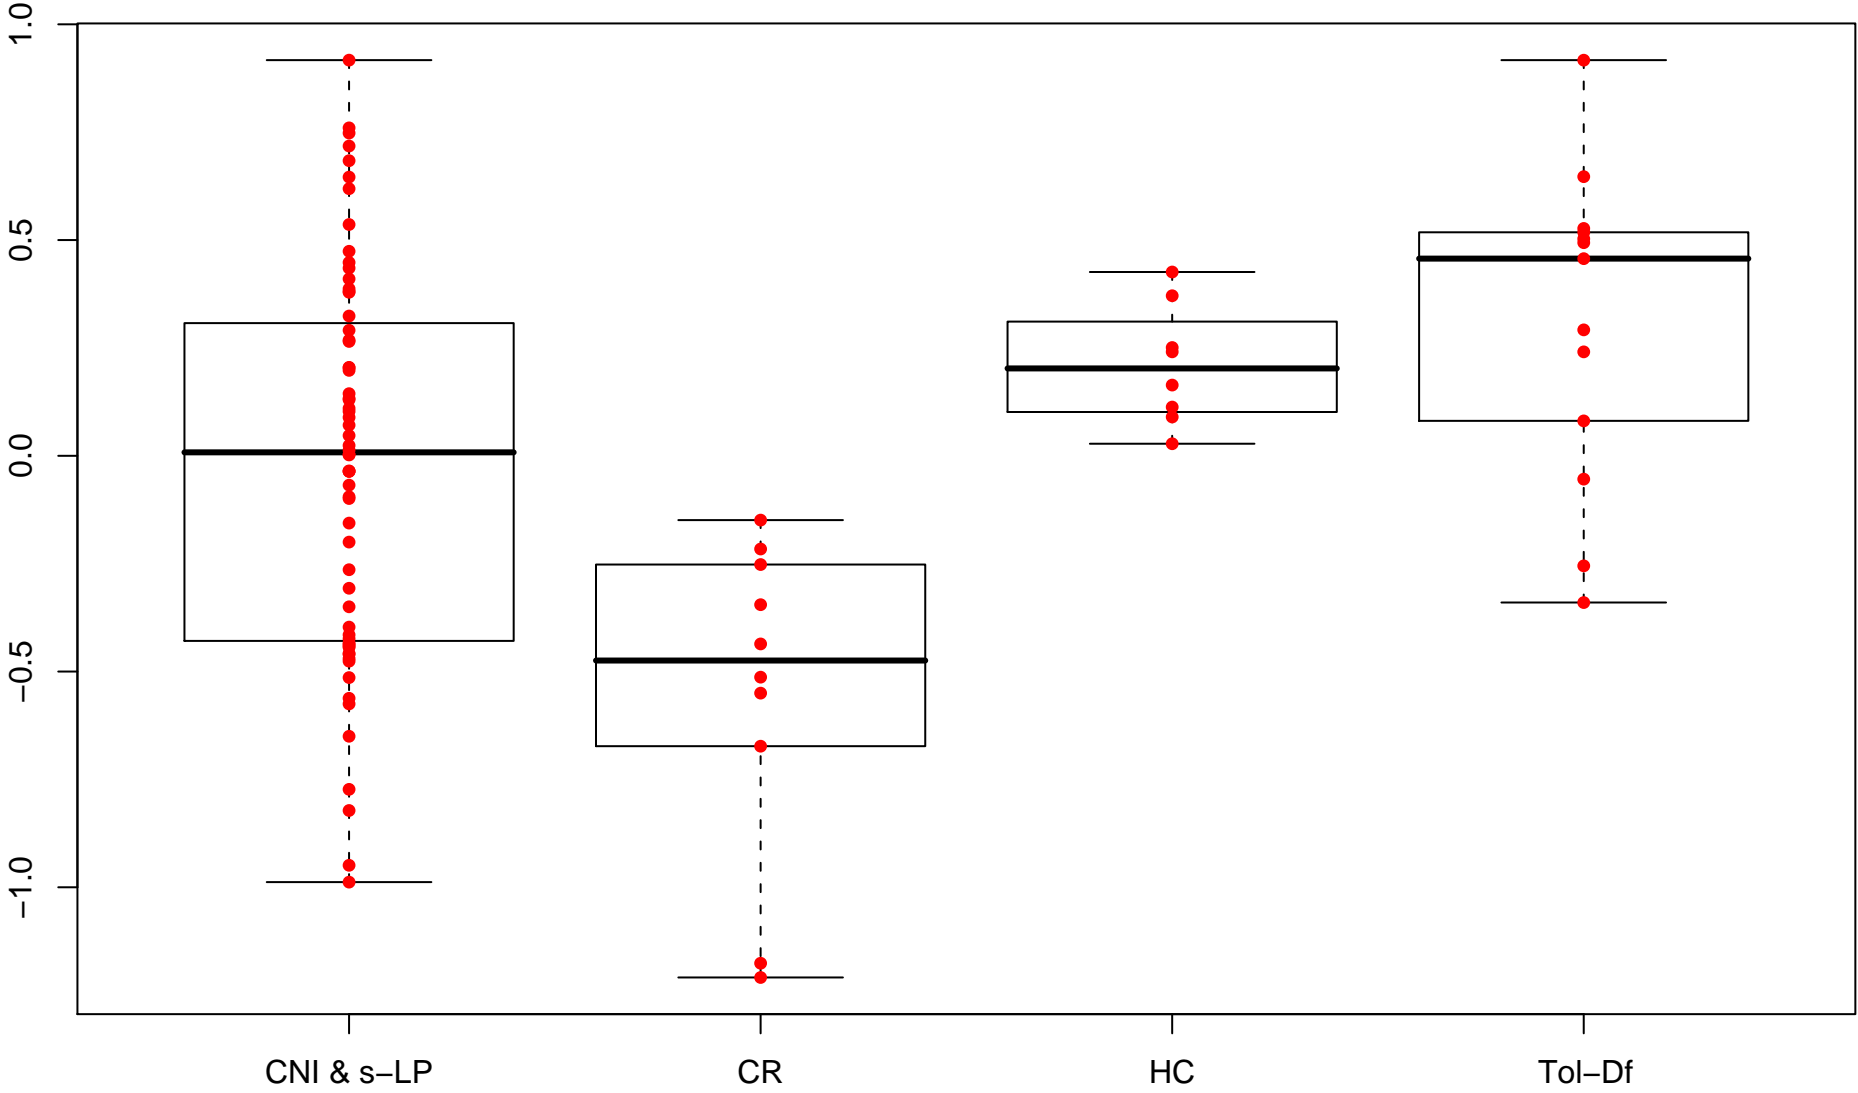

Rank 93 : GALNT14  
0.00013177

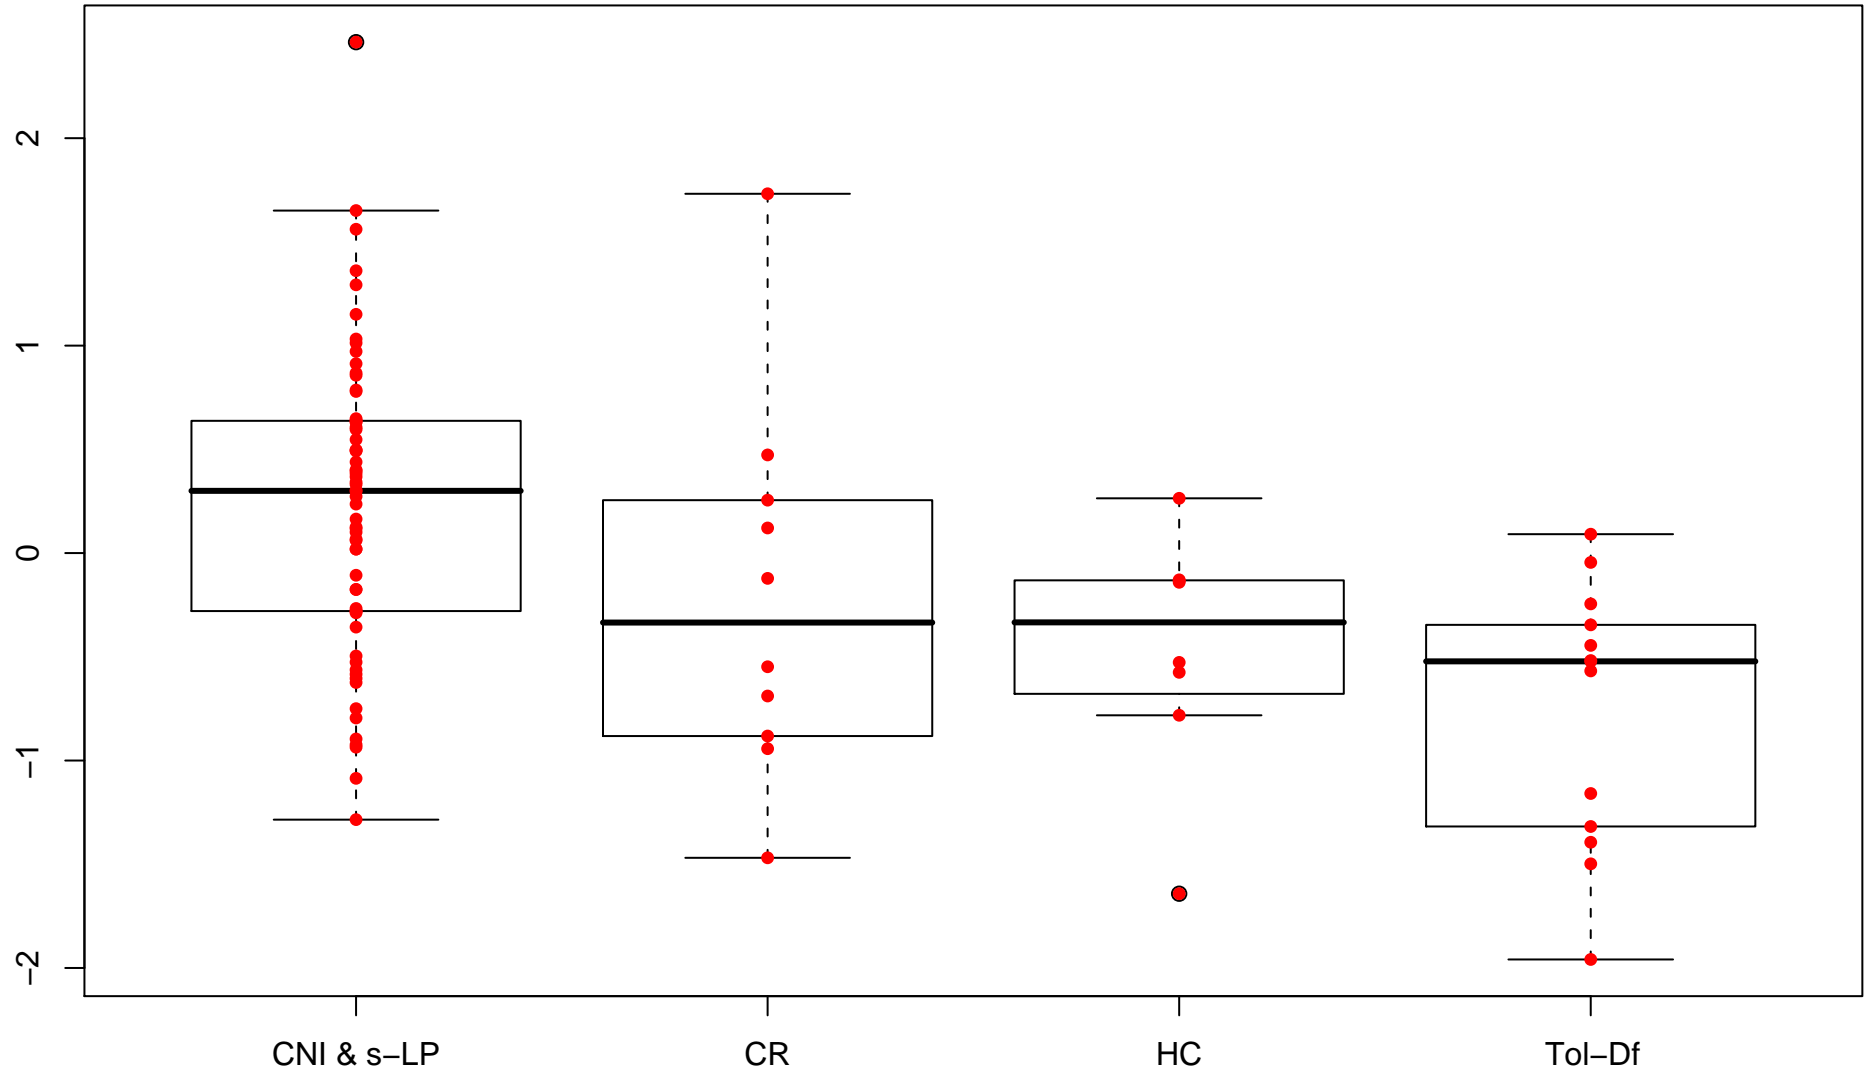

Rank 94 : TGDS  
0.00013296

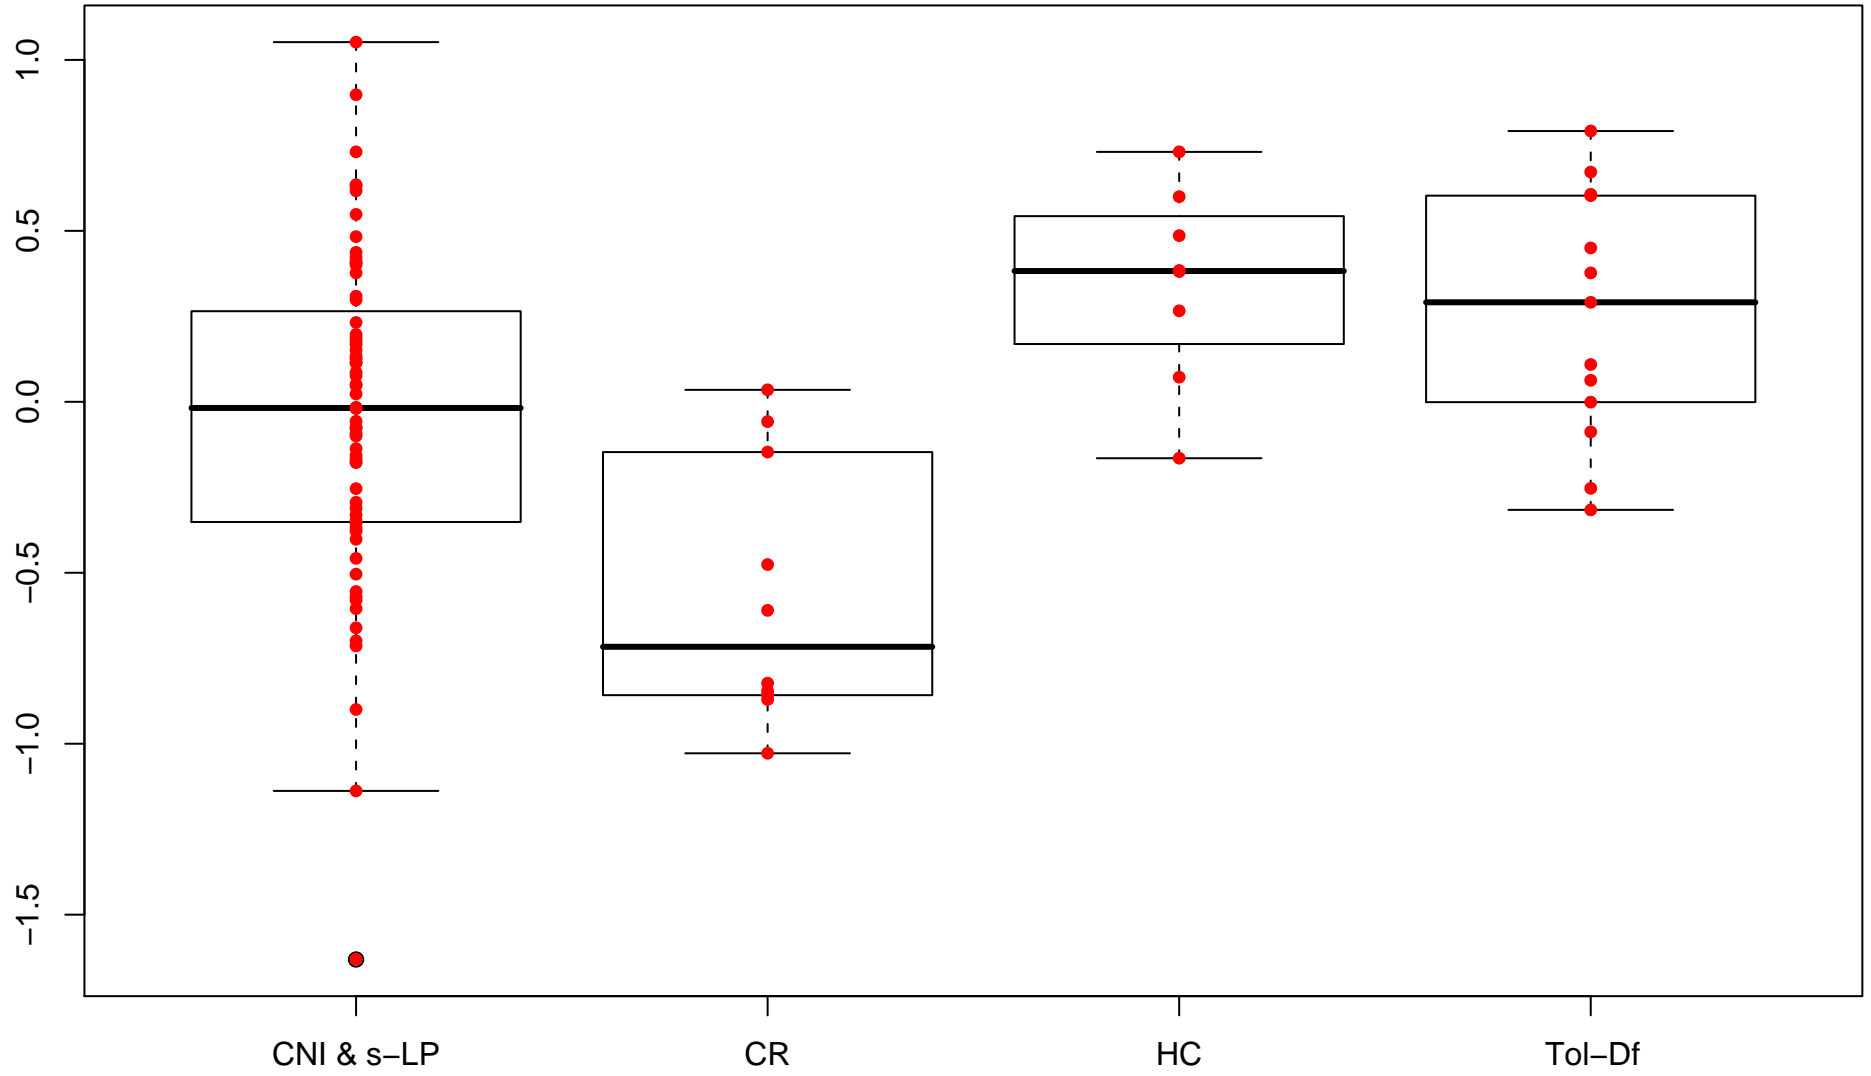

Rank 95 : VSIG2  
0.00013341

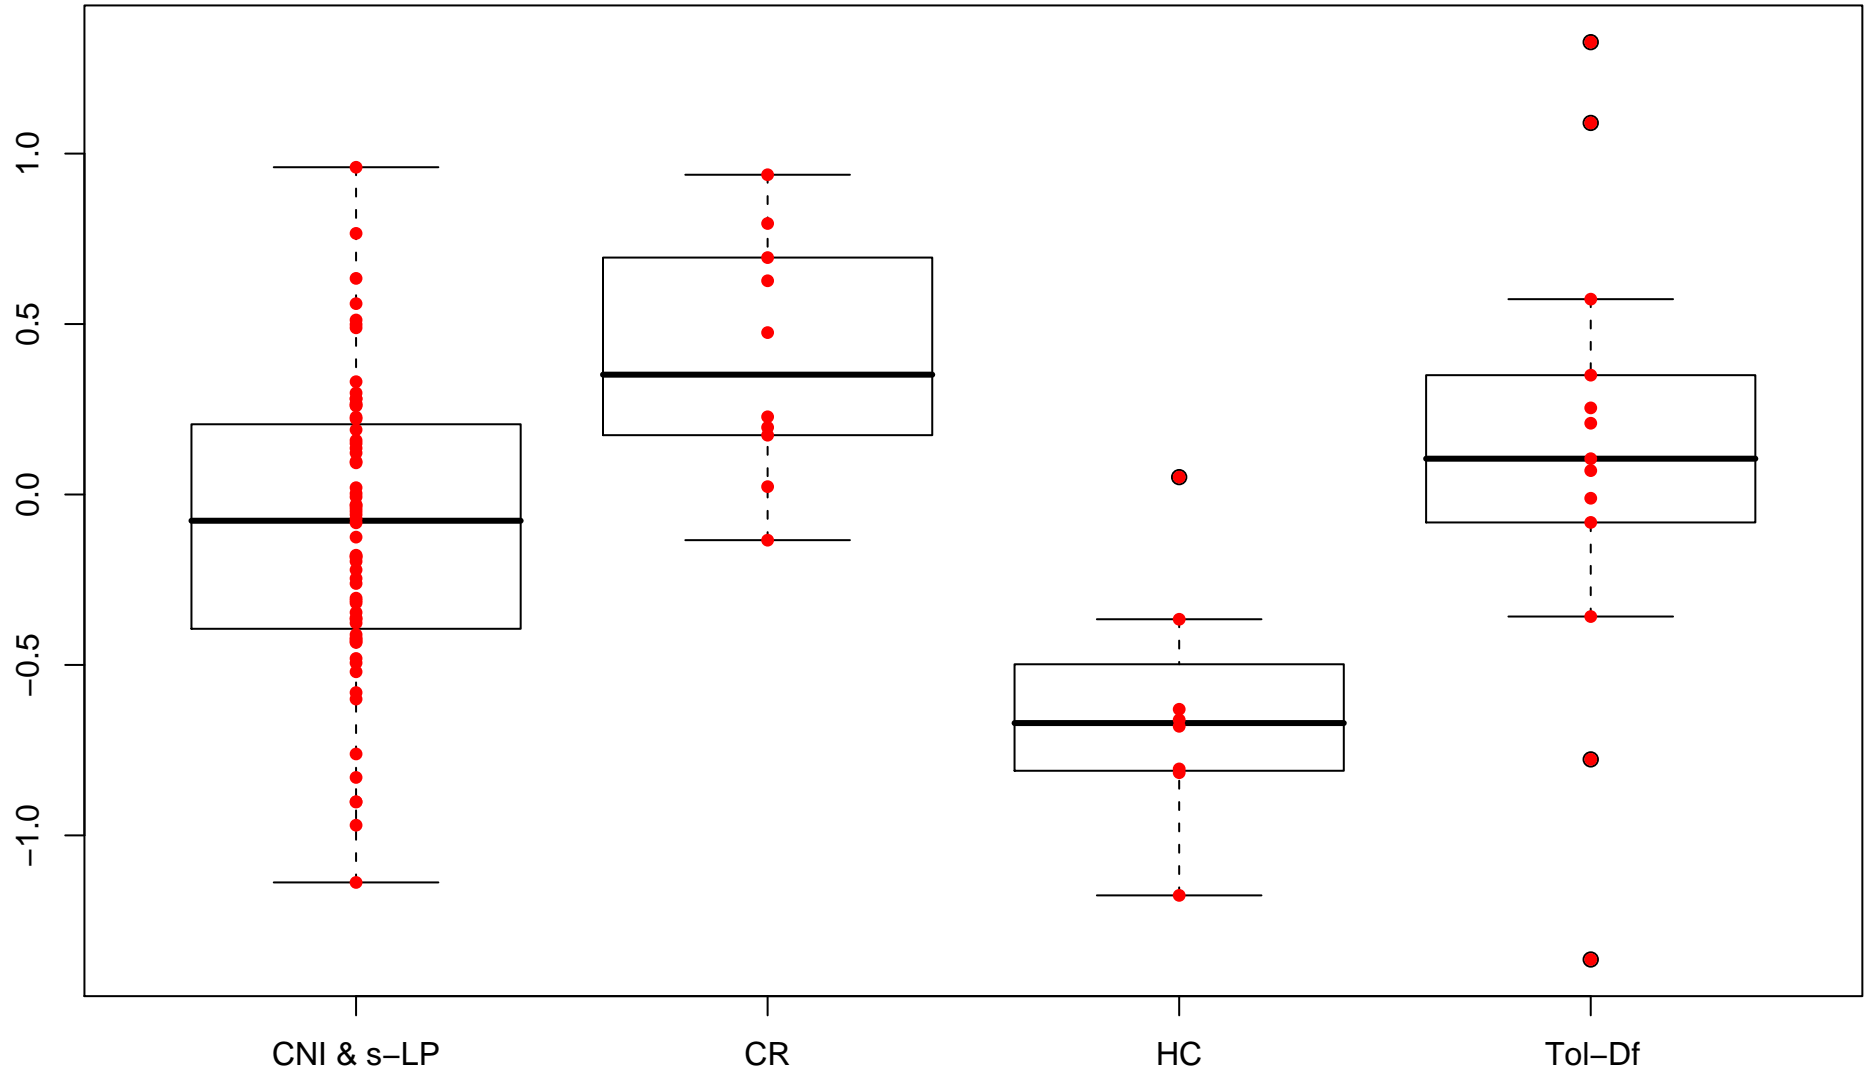

Rank 96 : DNAJC19  
0.00013469

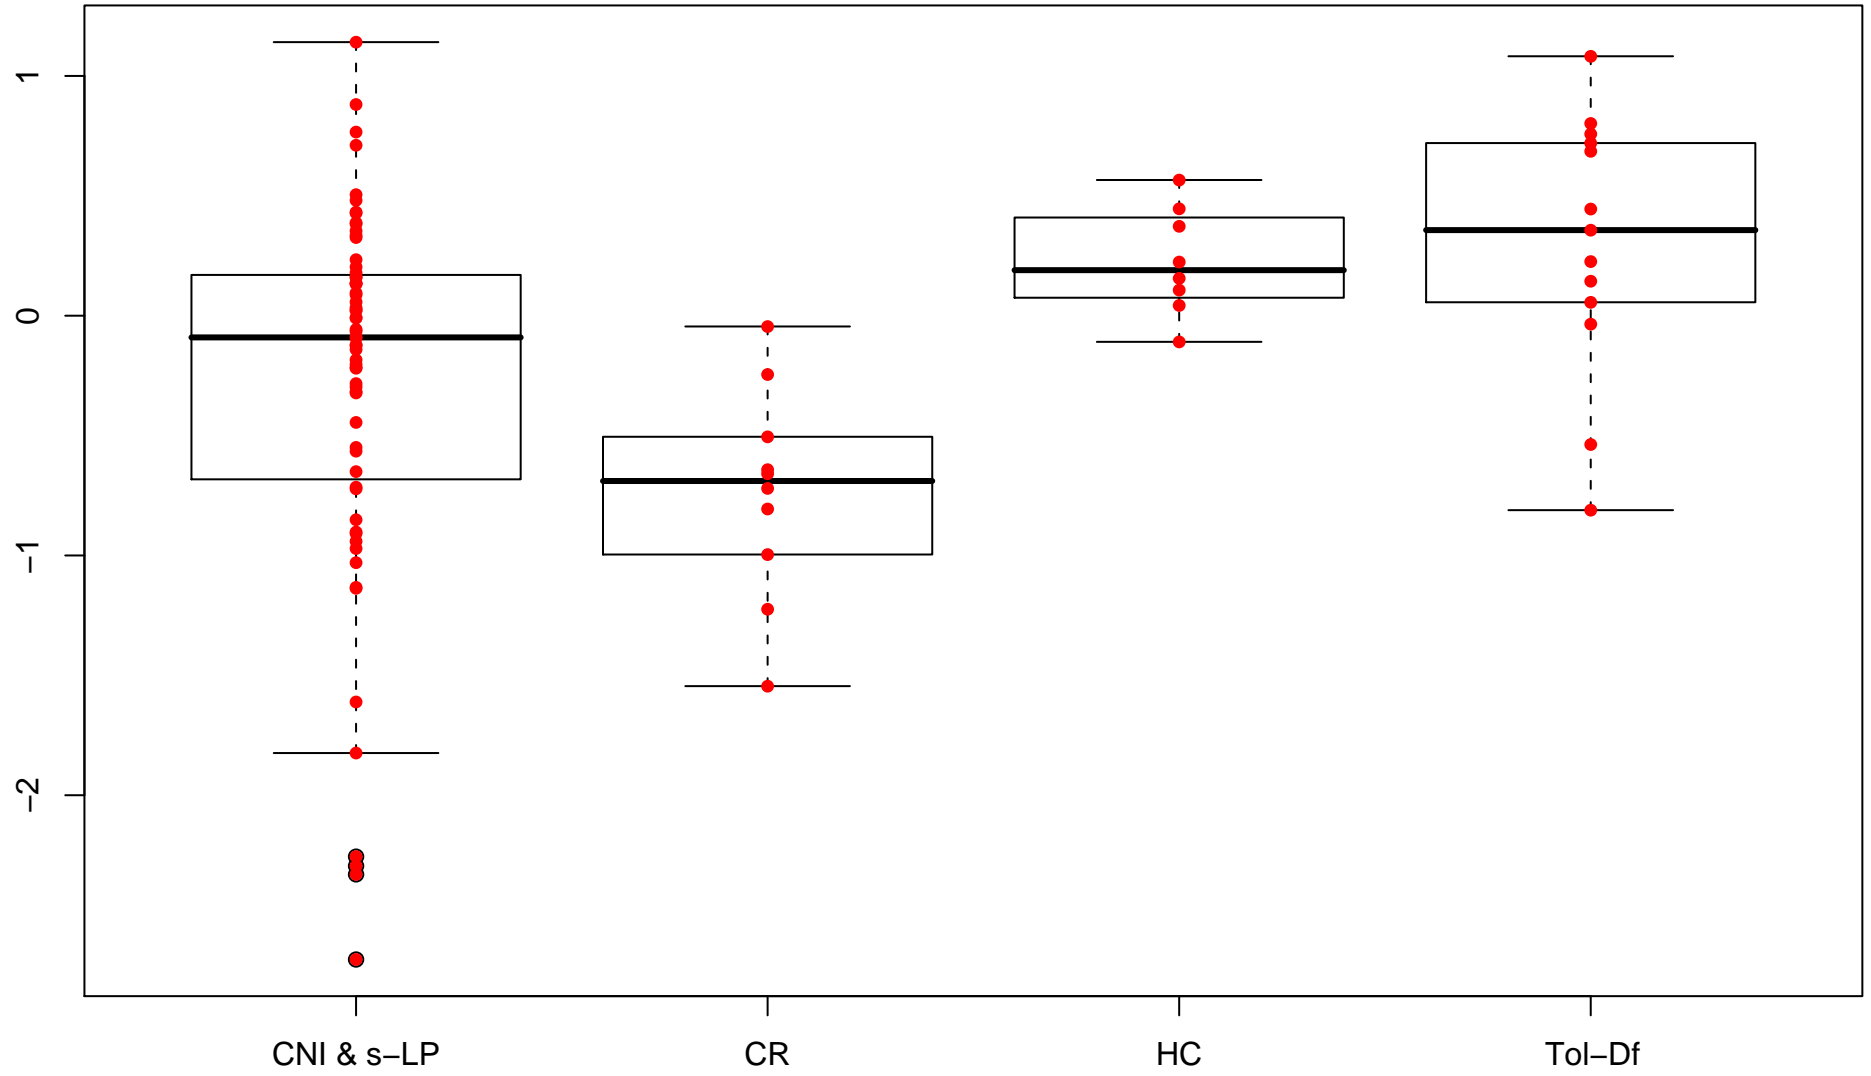

Rank 97 : A\_23\_P126328  
0.00013582

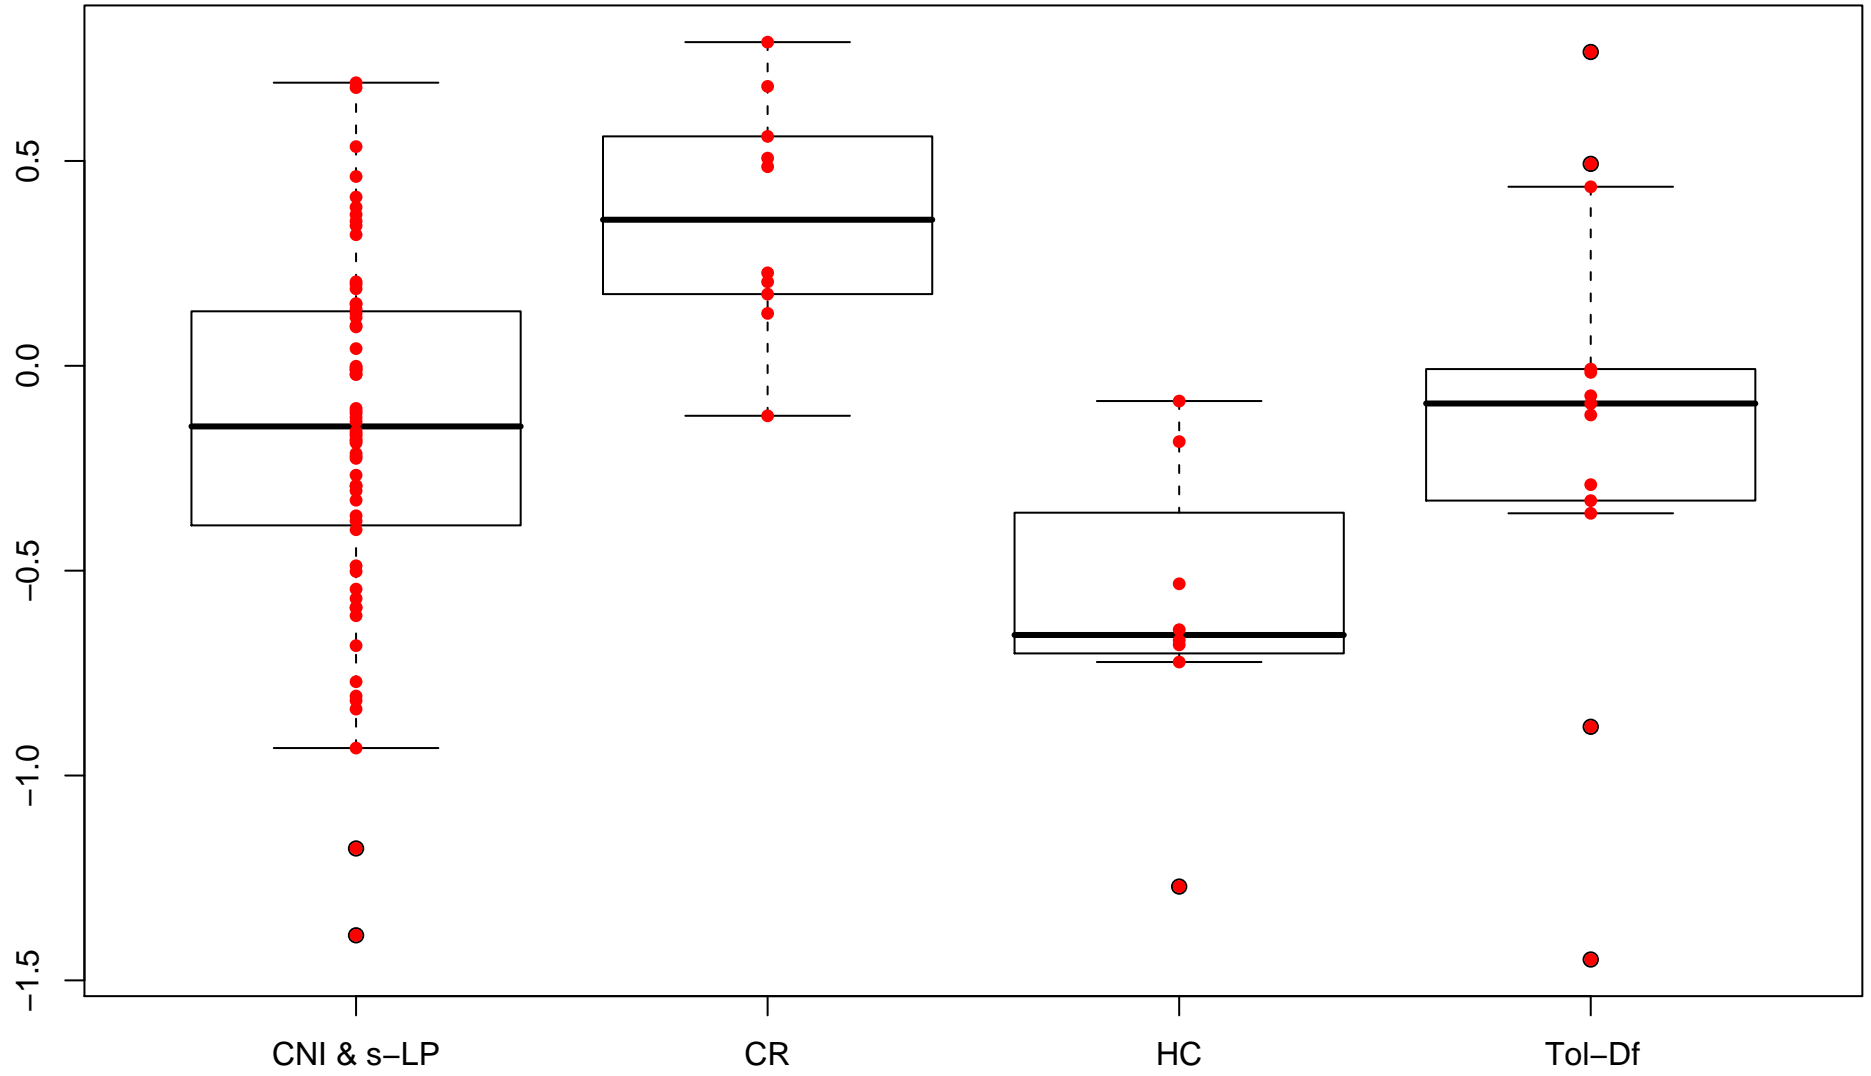

Rank 98 : PPL  
0.00013882

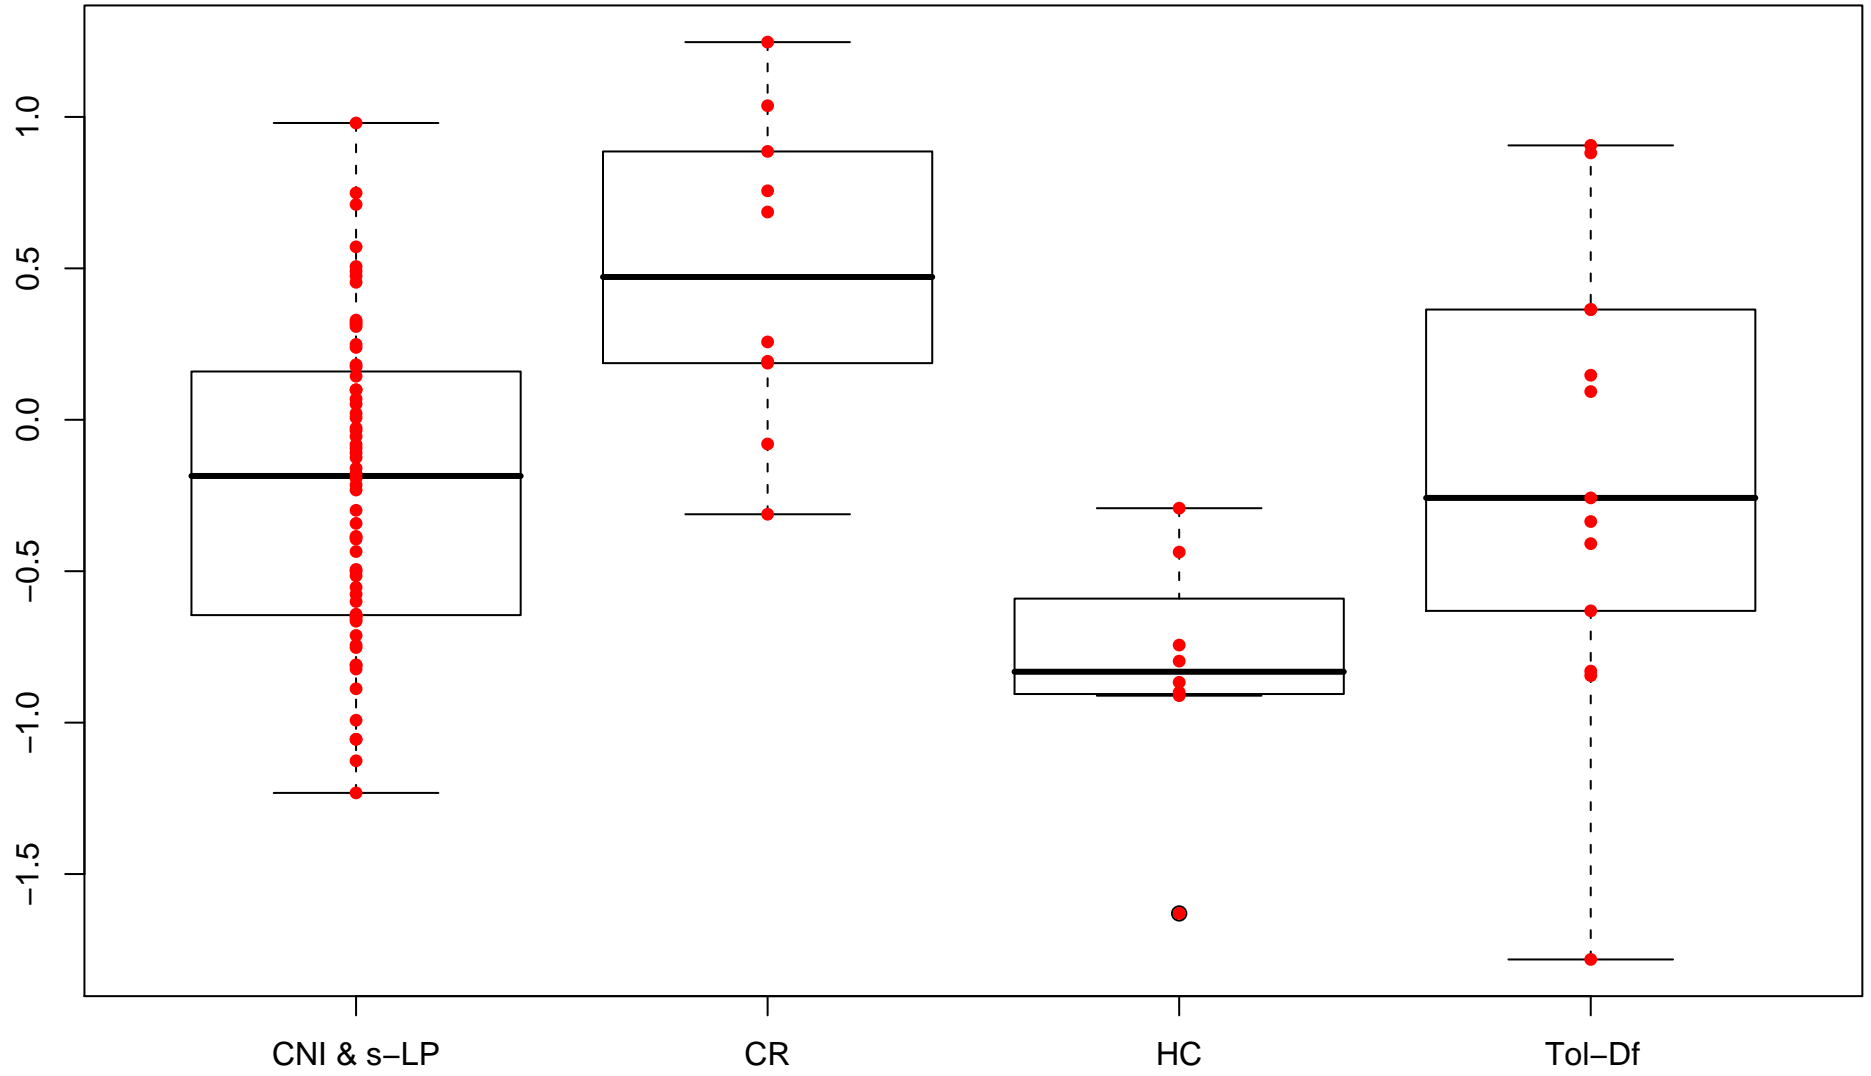



Rank 99 : WASF3  
0.00014123

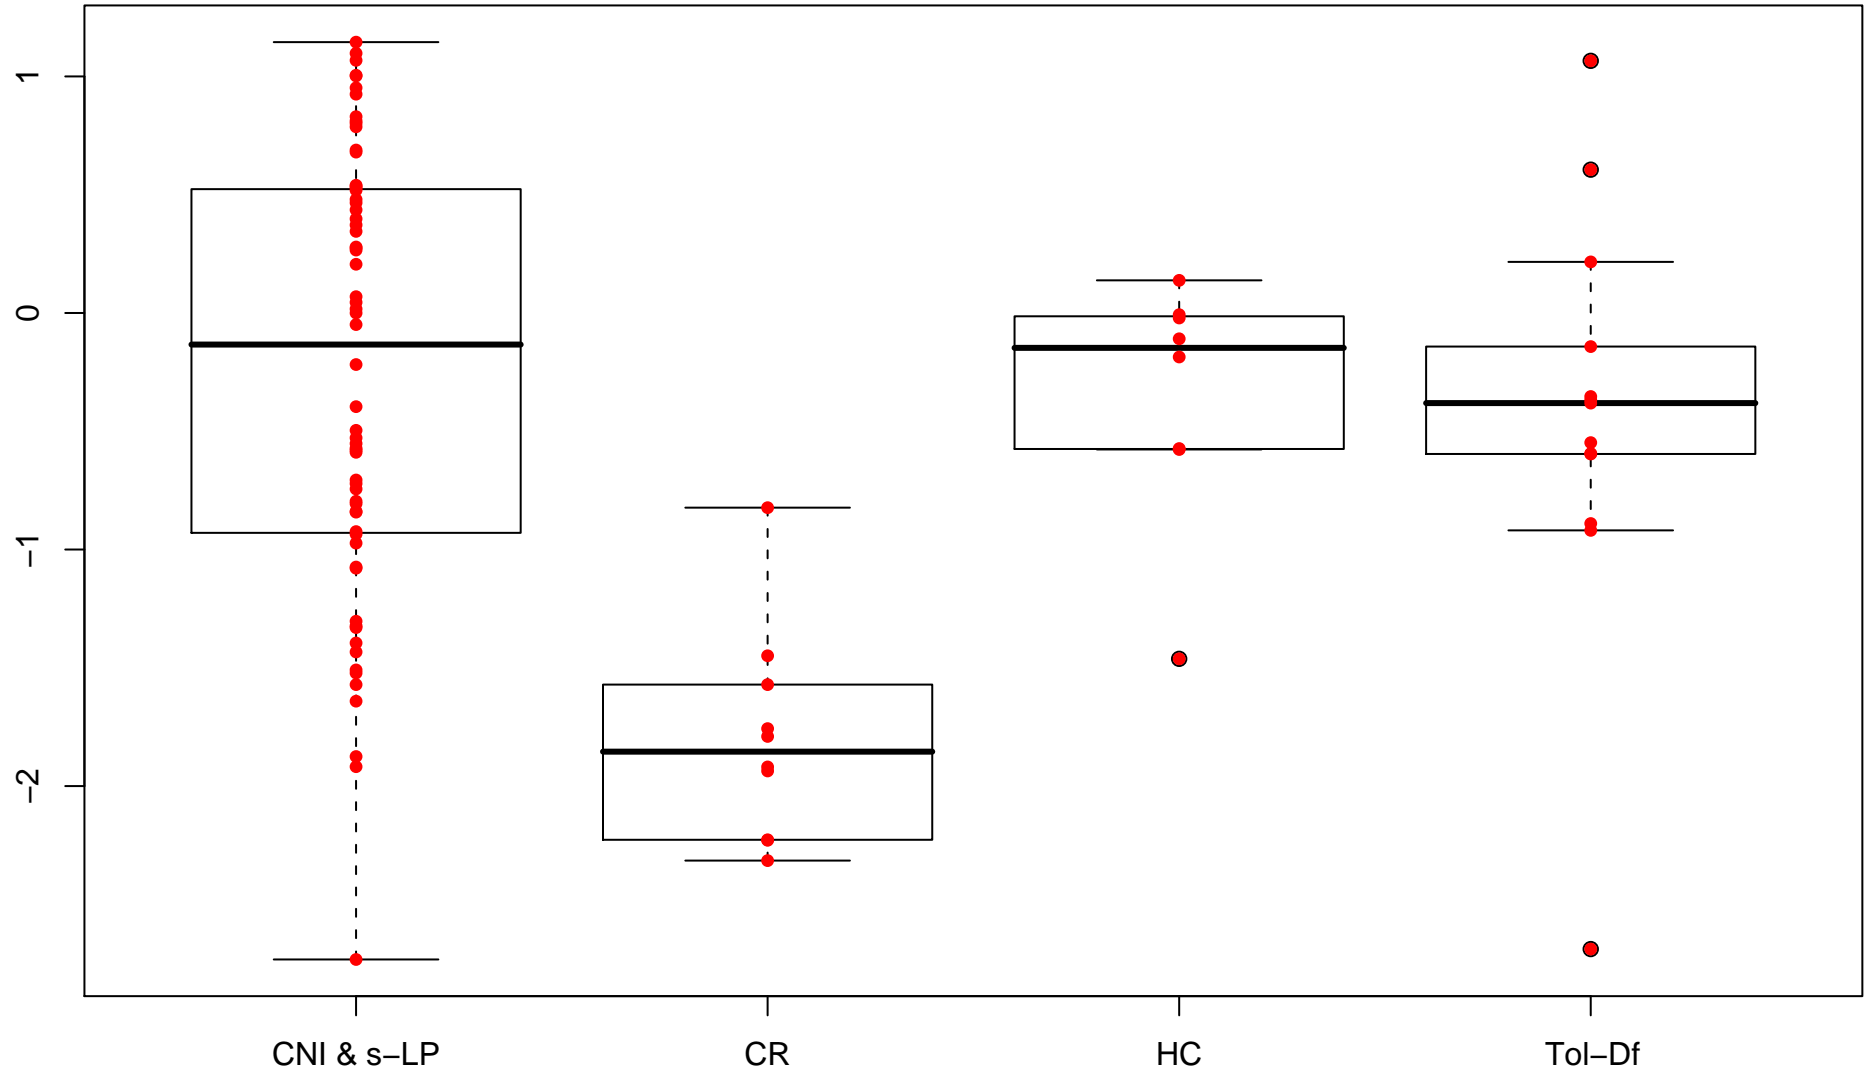

Rank 100 : THC2380706  
0.00014497

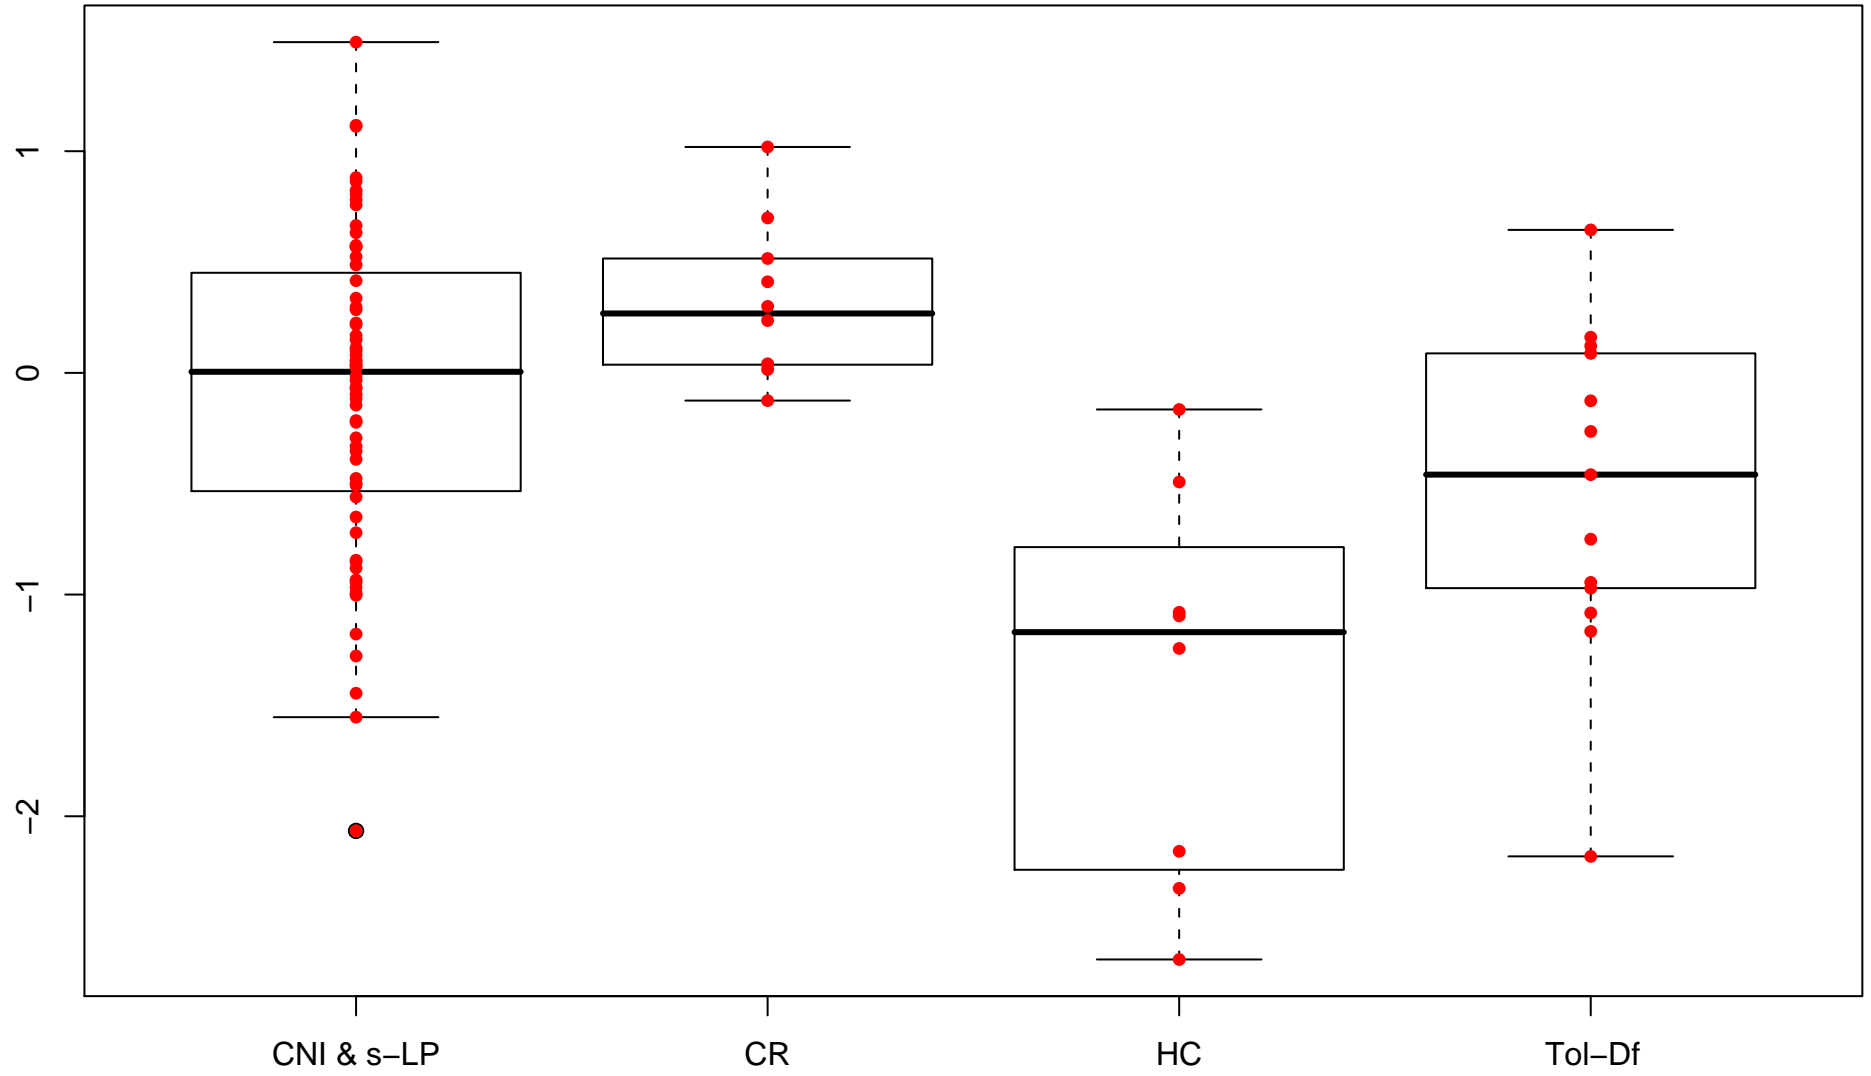

Rank 101 : C1ORF19  
0.00014827

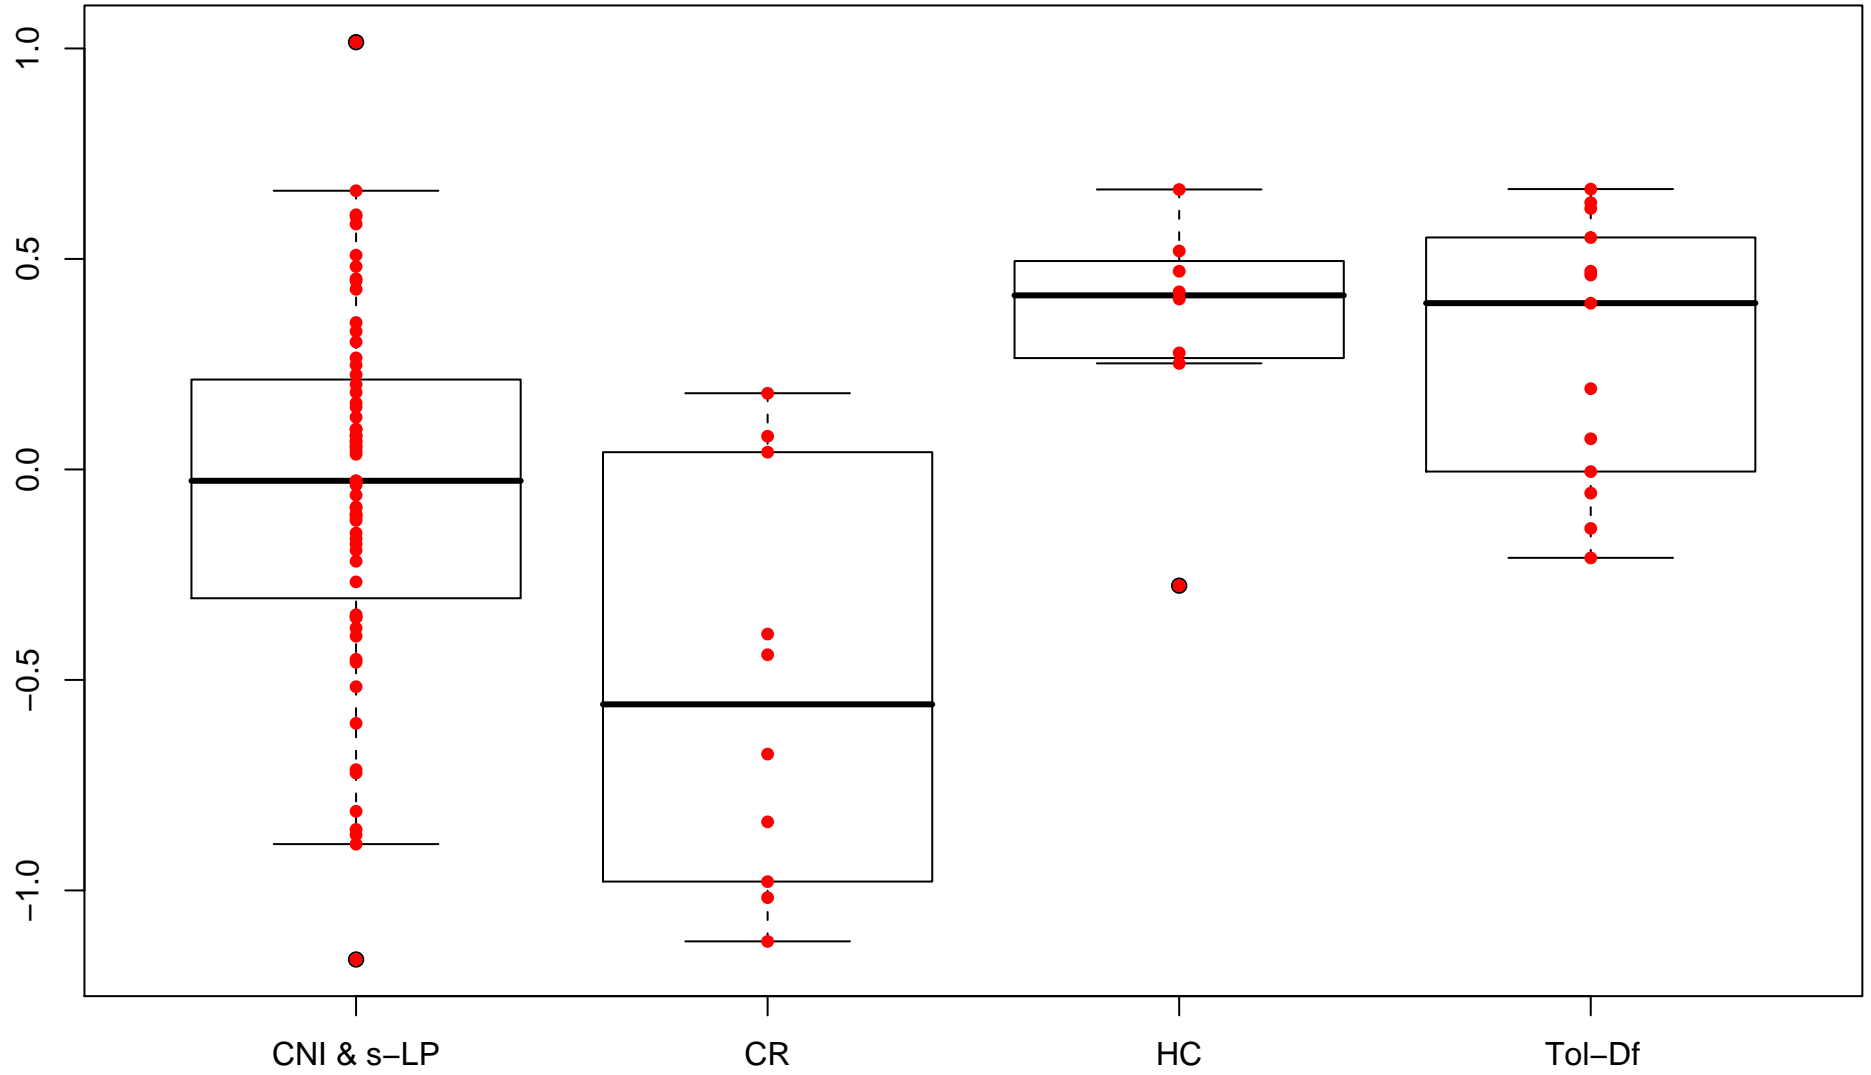

Rank 102 : SERPINH1  
0.00015675

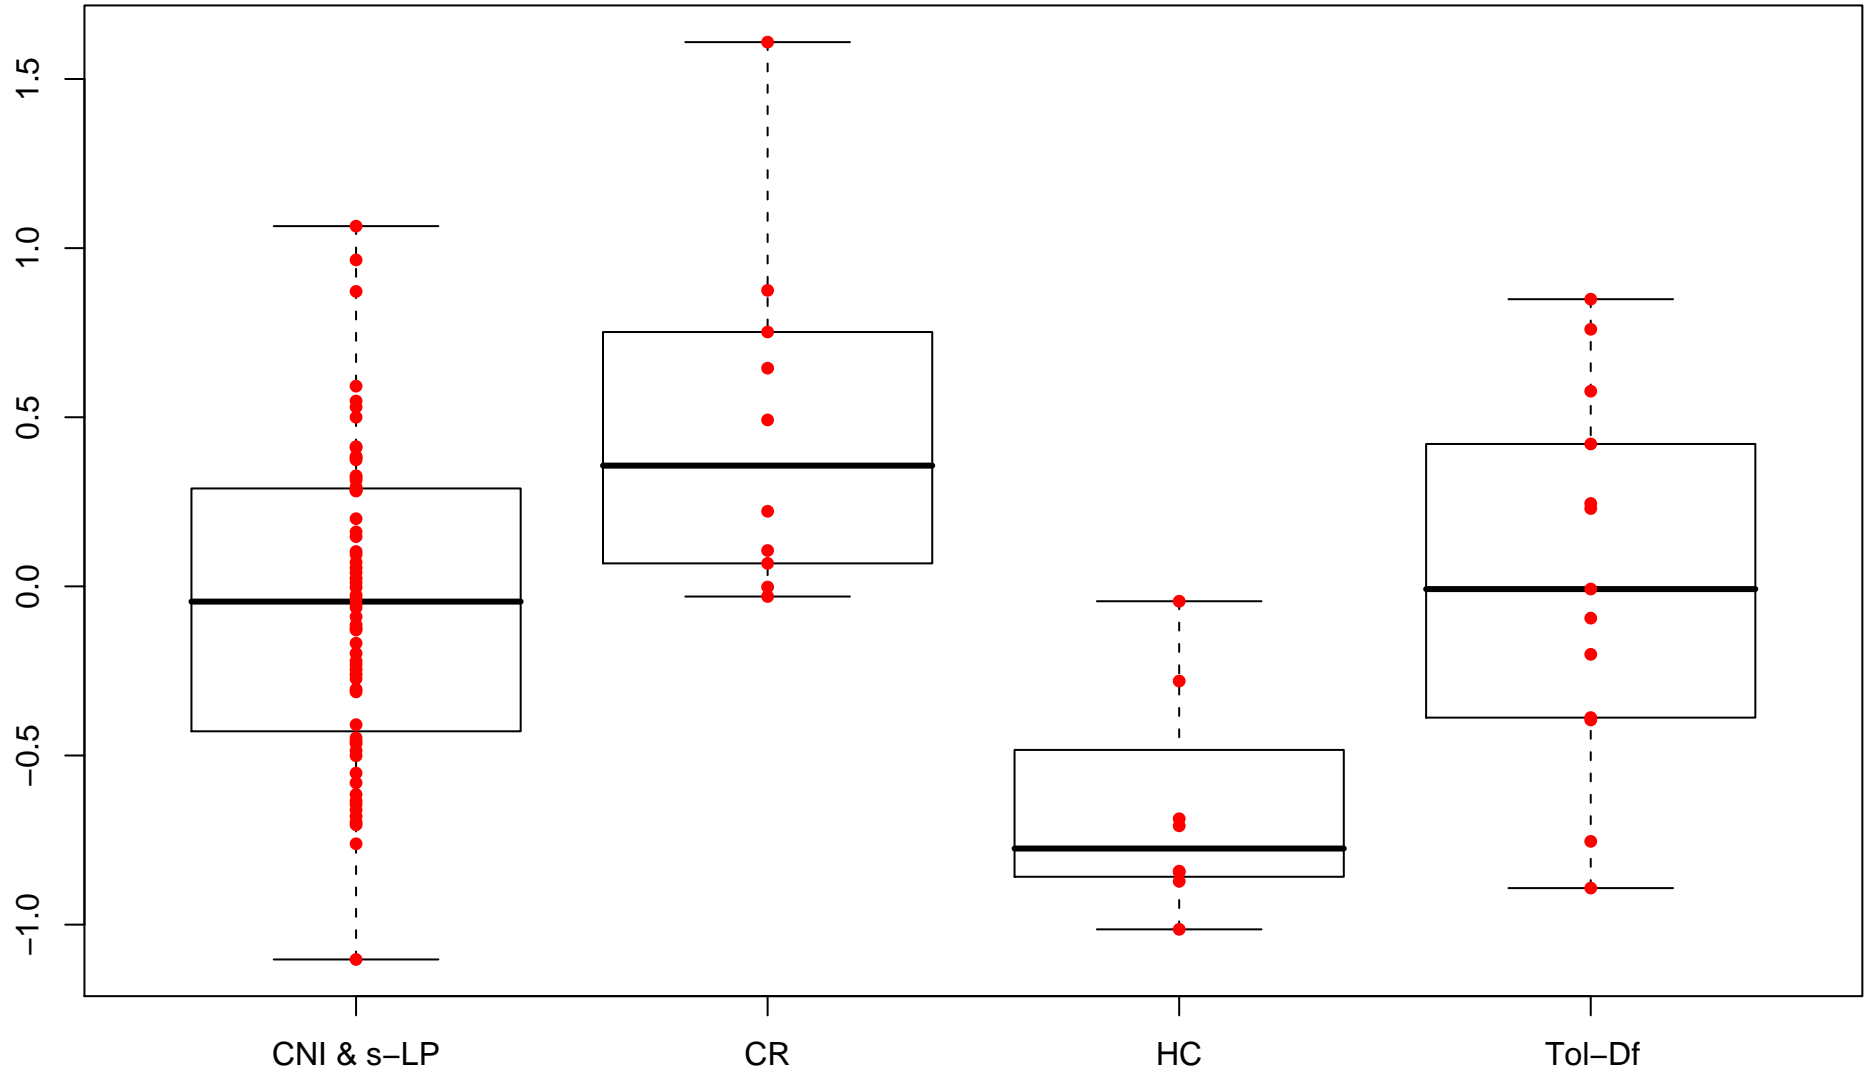

Rank 103 : LITAF  
0.00016266

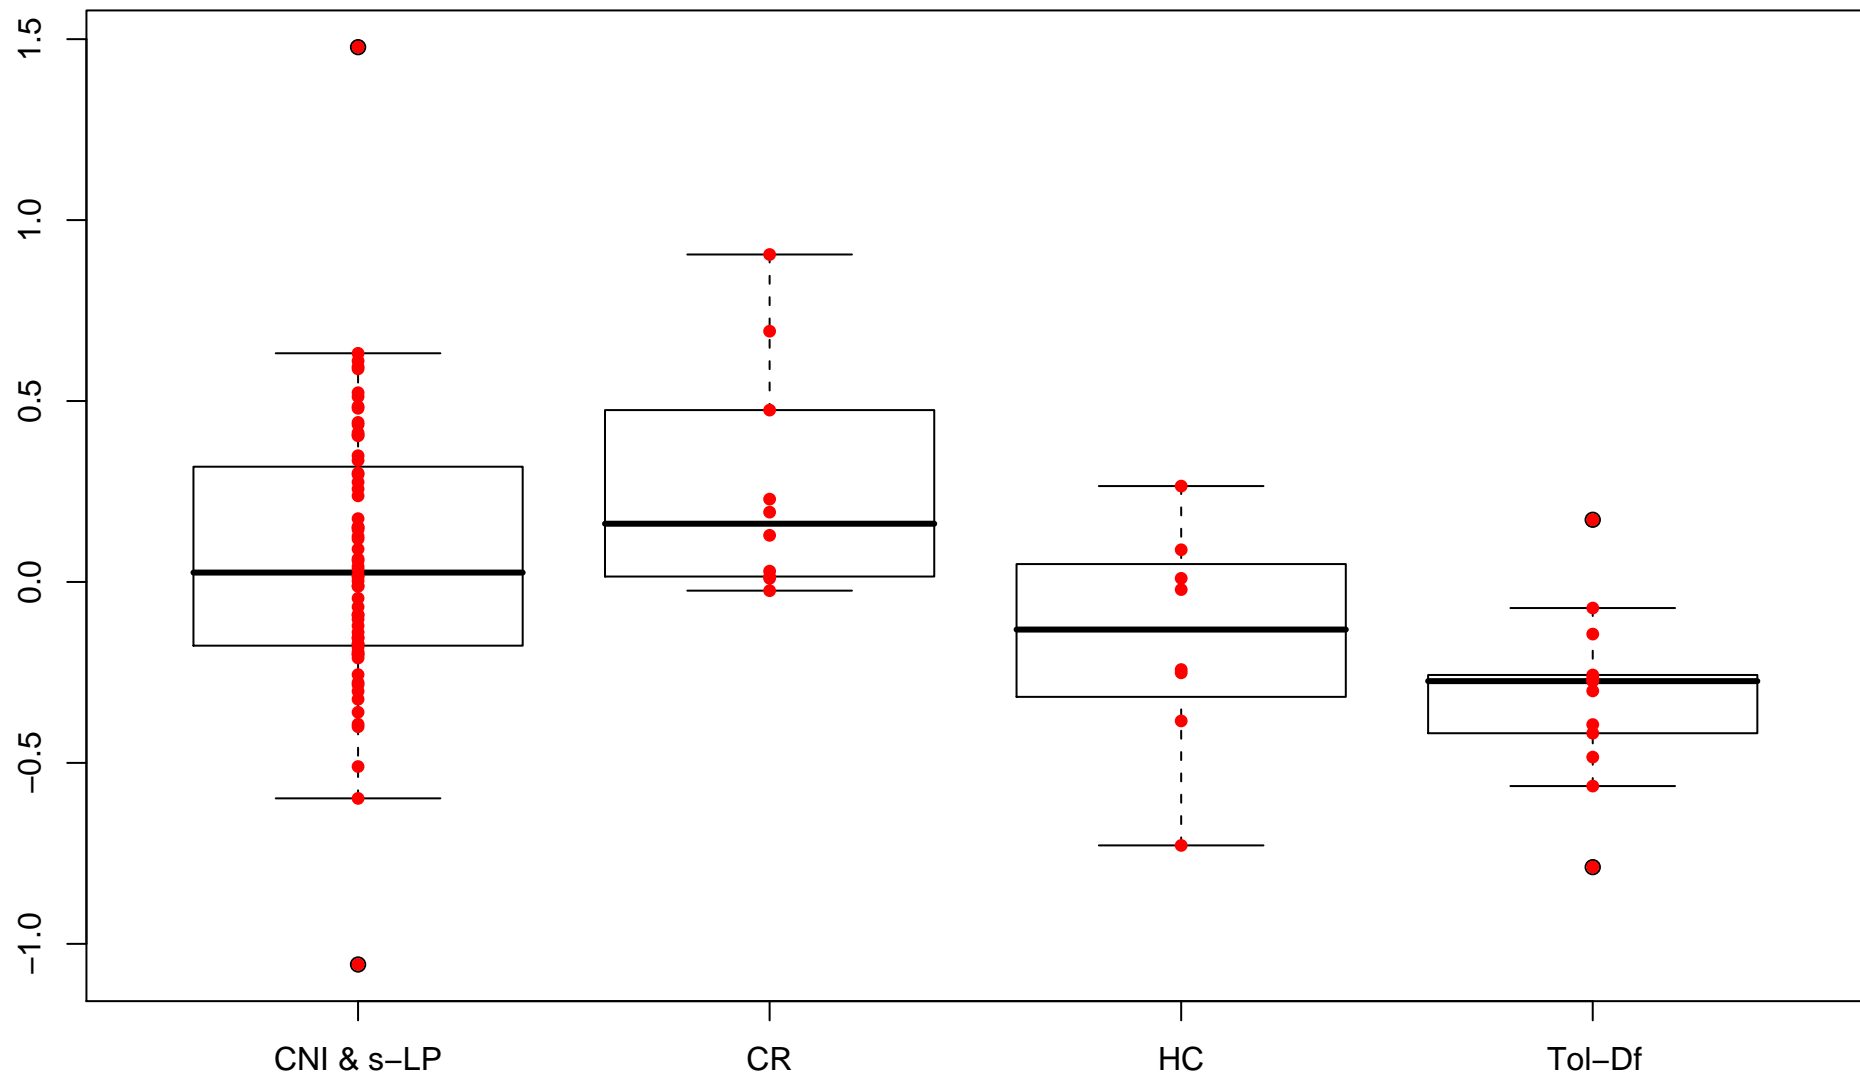

Rank 104 : FLJ37035  
0.00016688

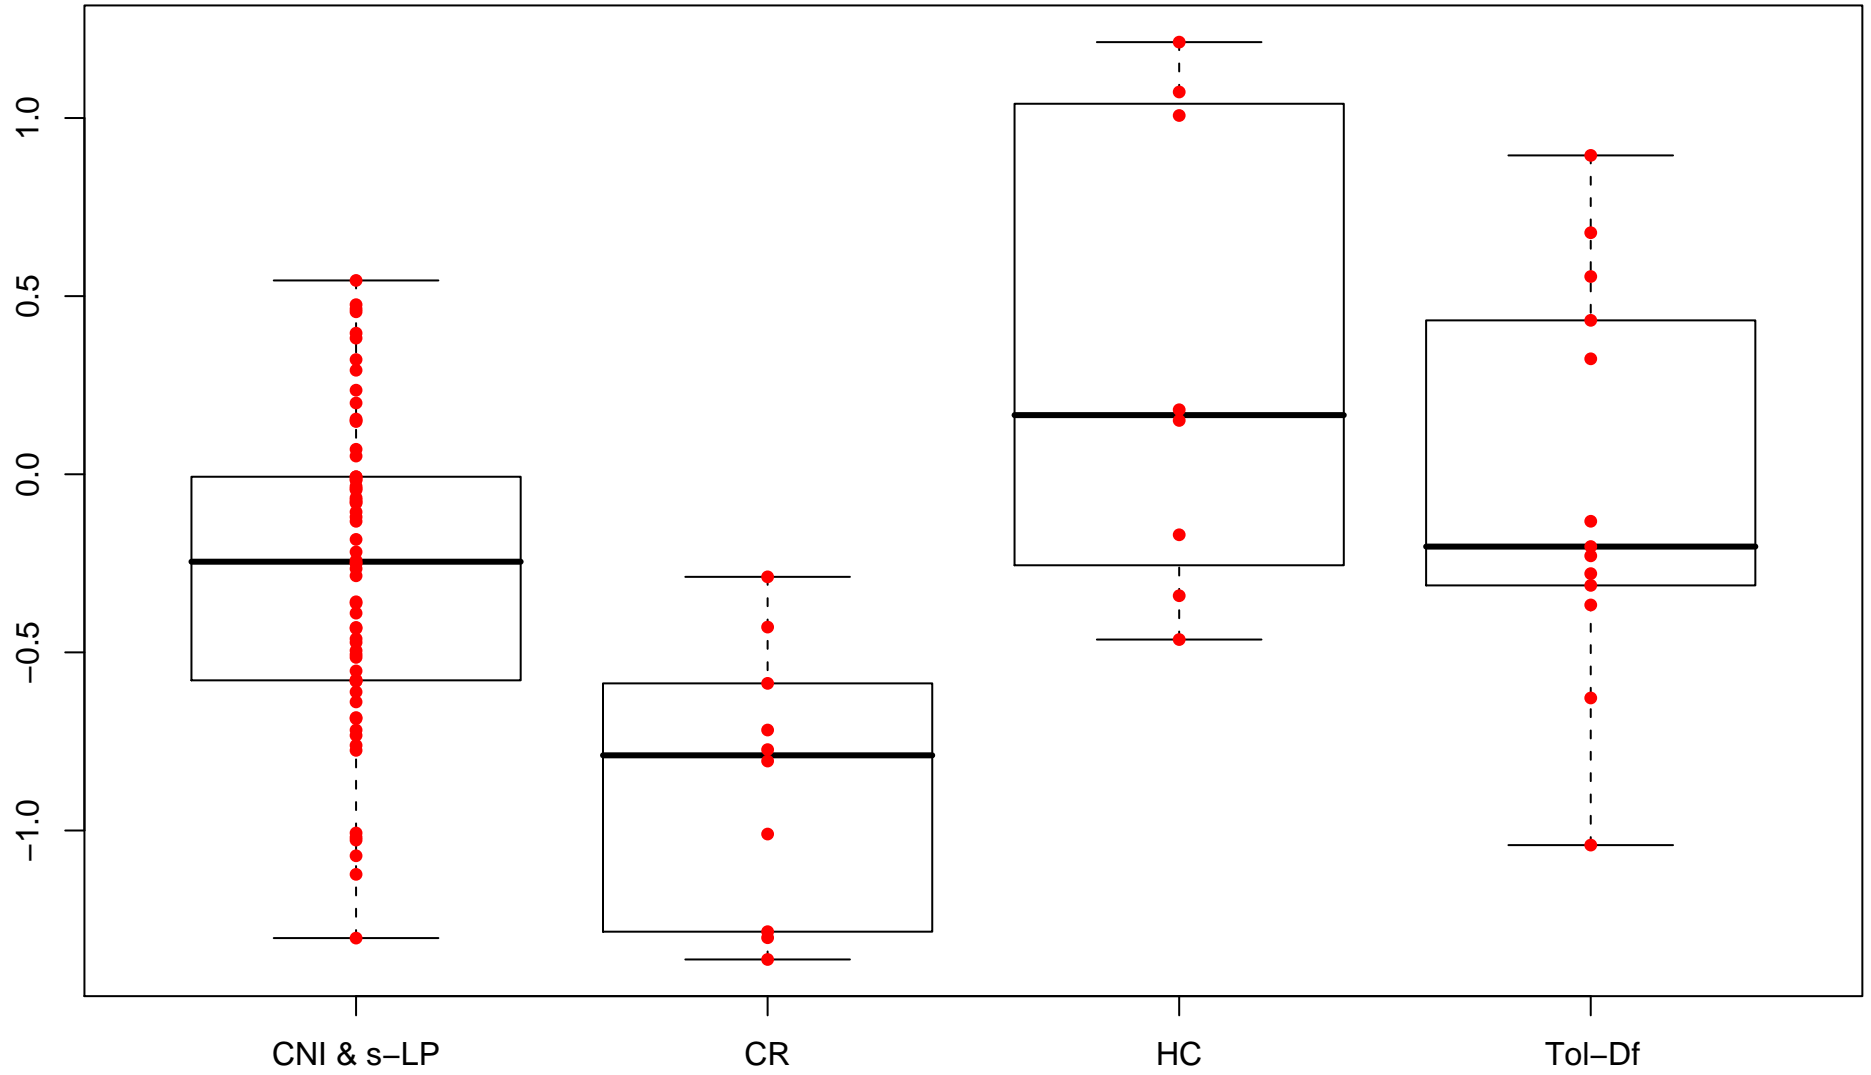

Rank 105 : FGF7  
0.00017408

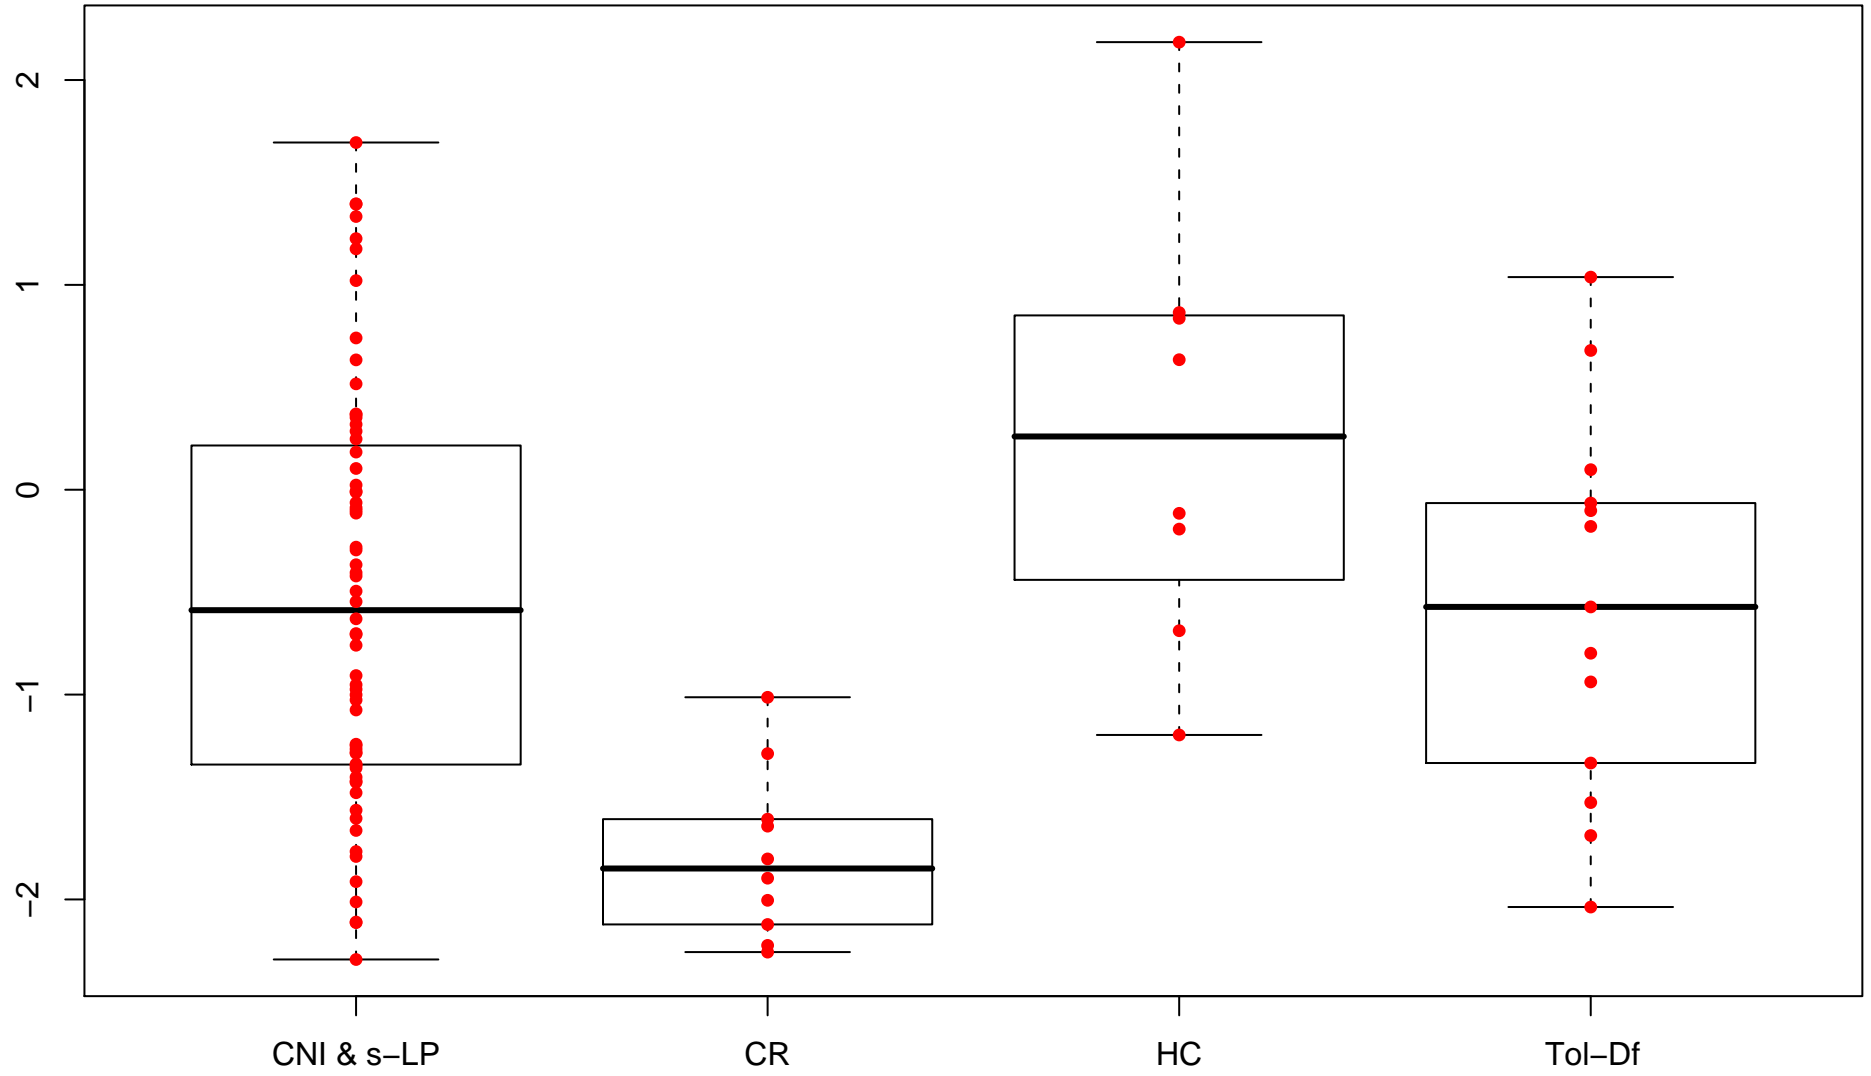

Rank 106 : SLC25A37  
0.00017489

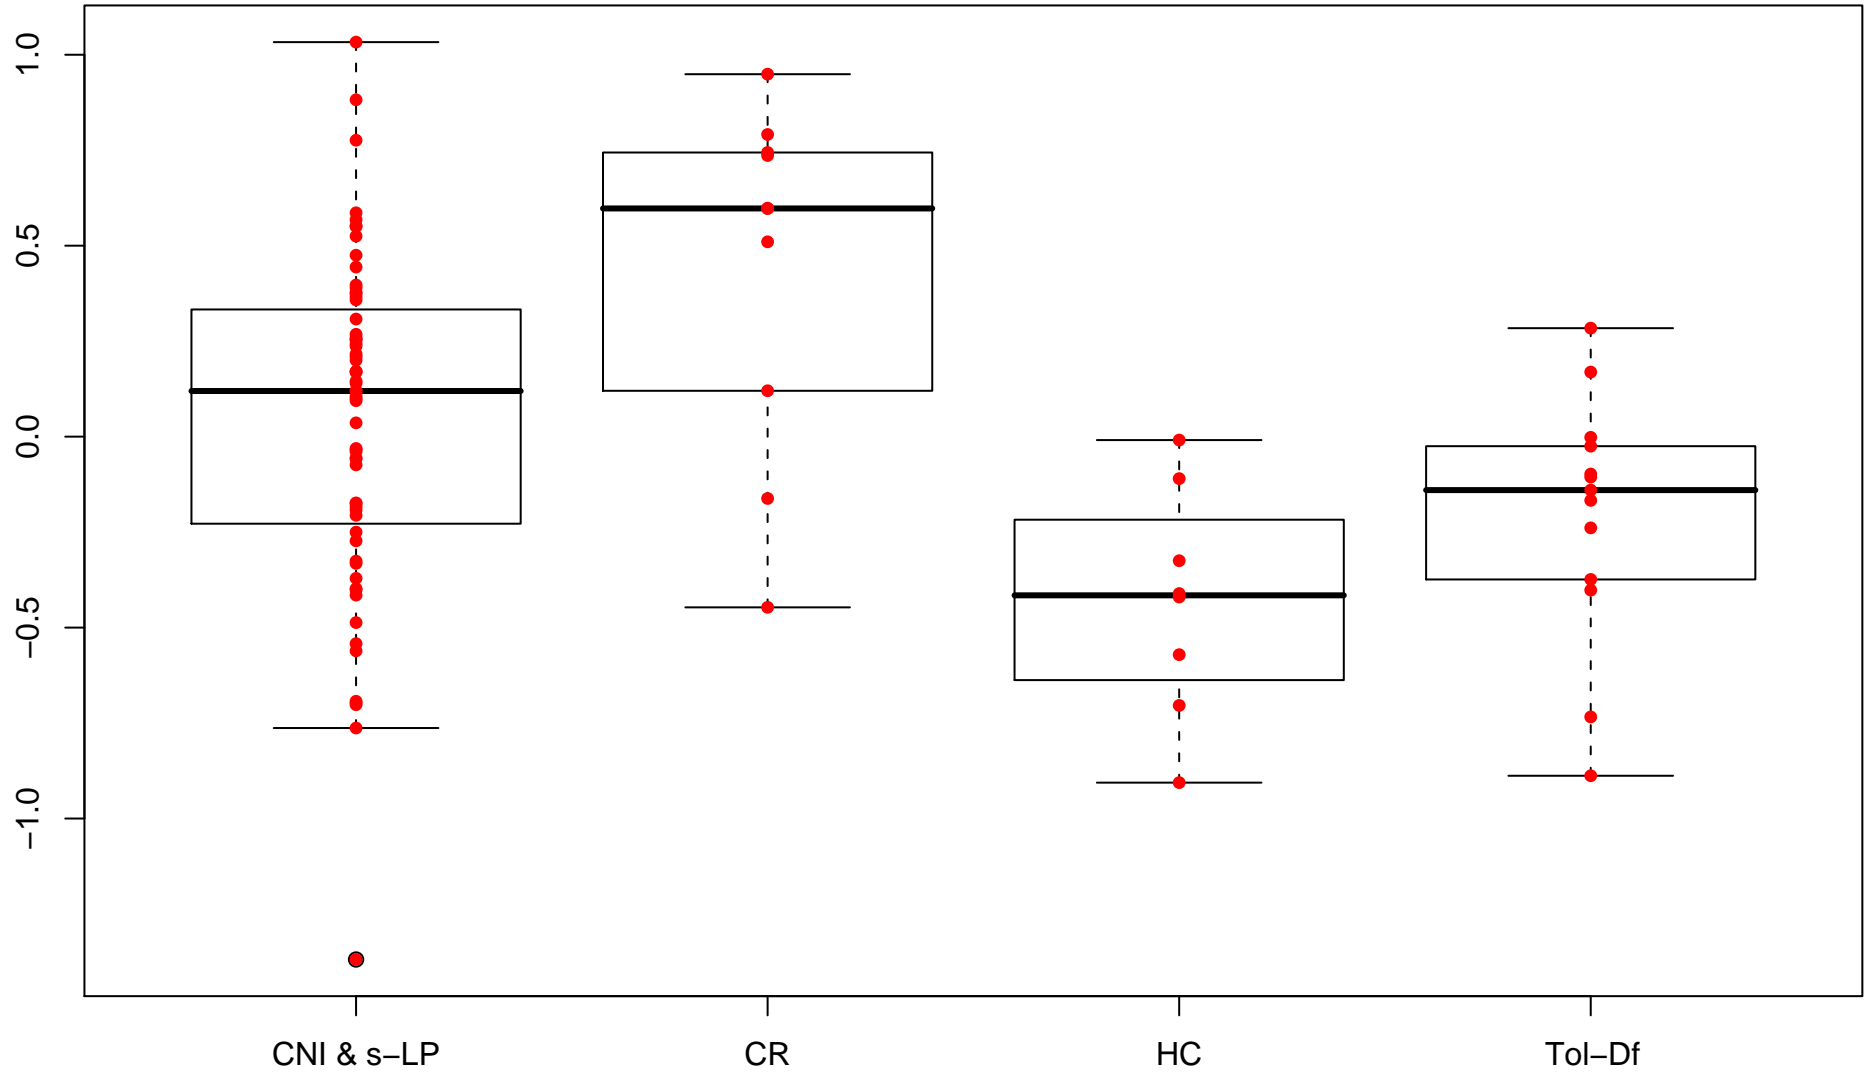



Rank 107 : IGF1R  
0.00019761

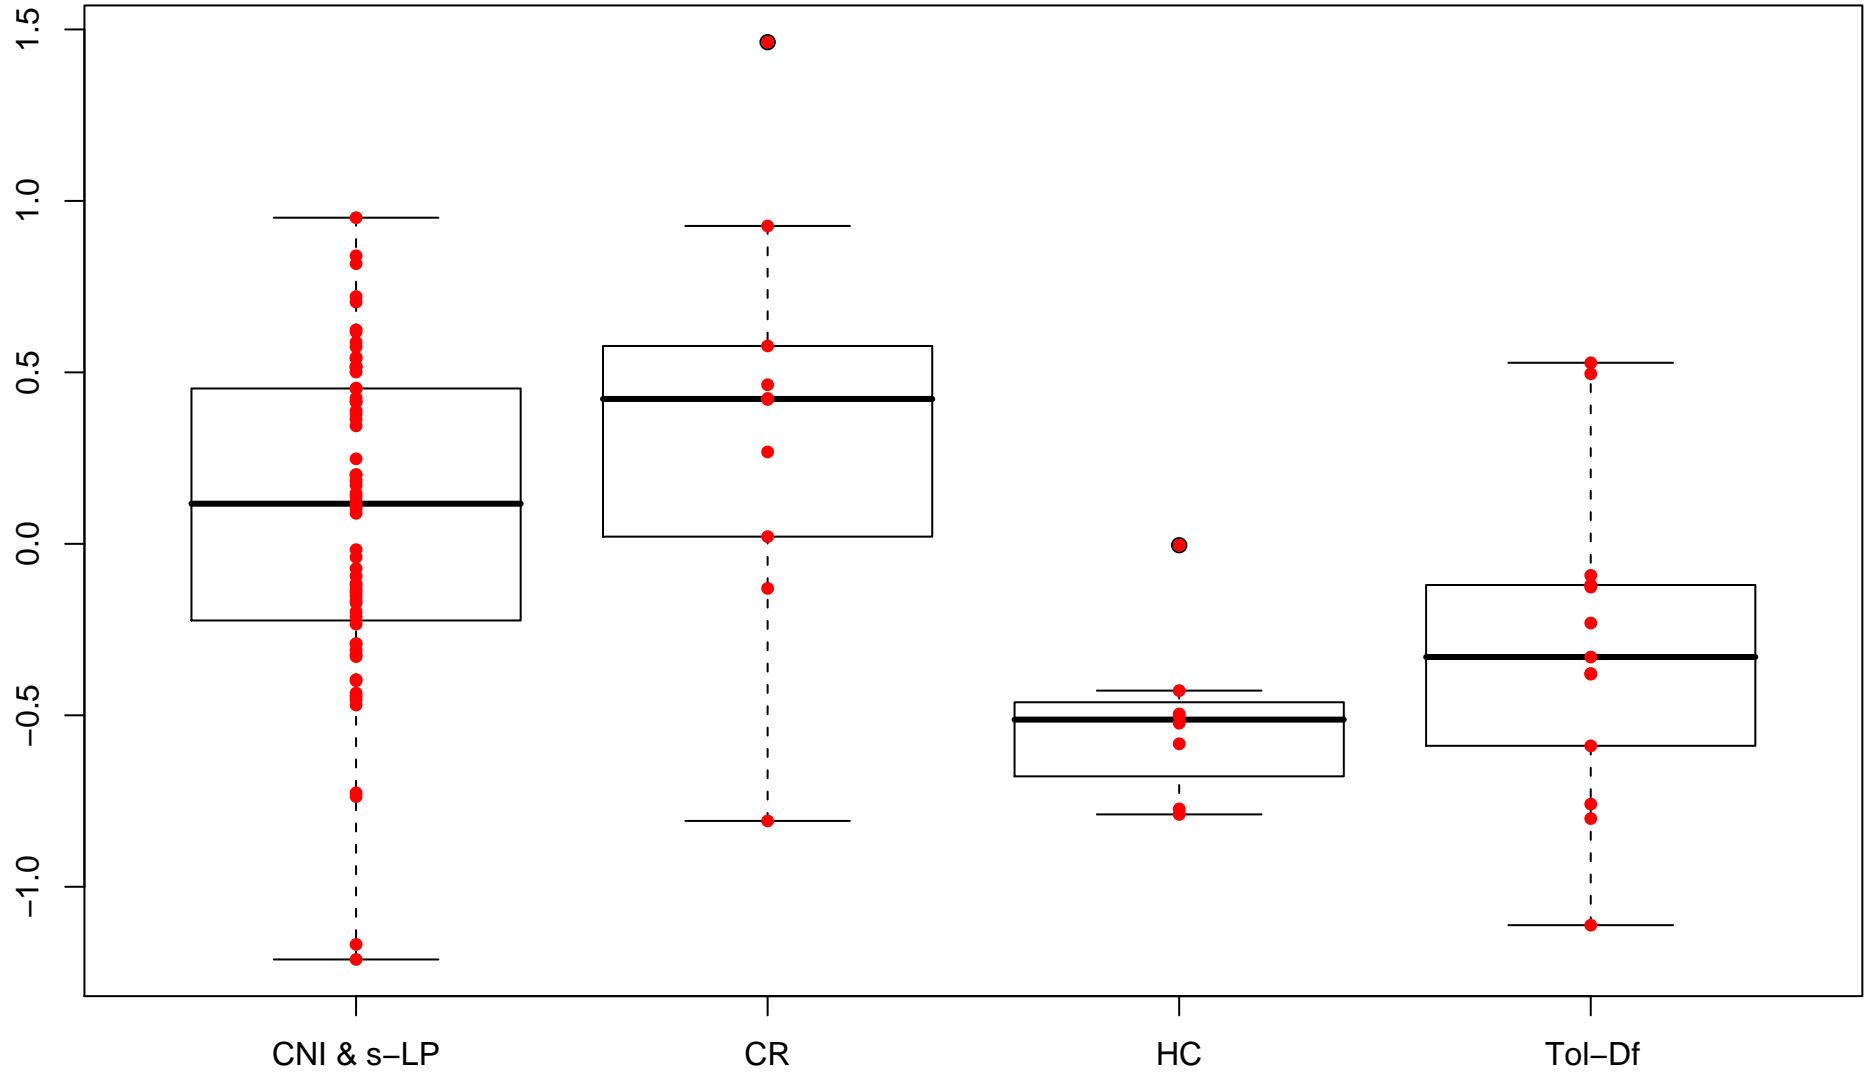

Rank 108 : EDG1  
0.00019885

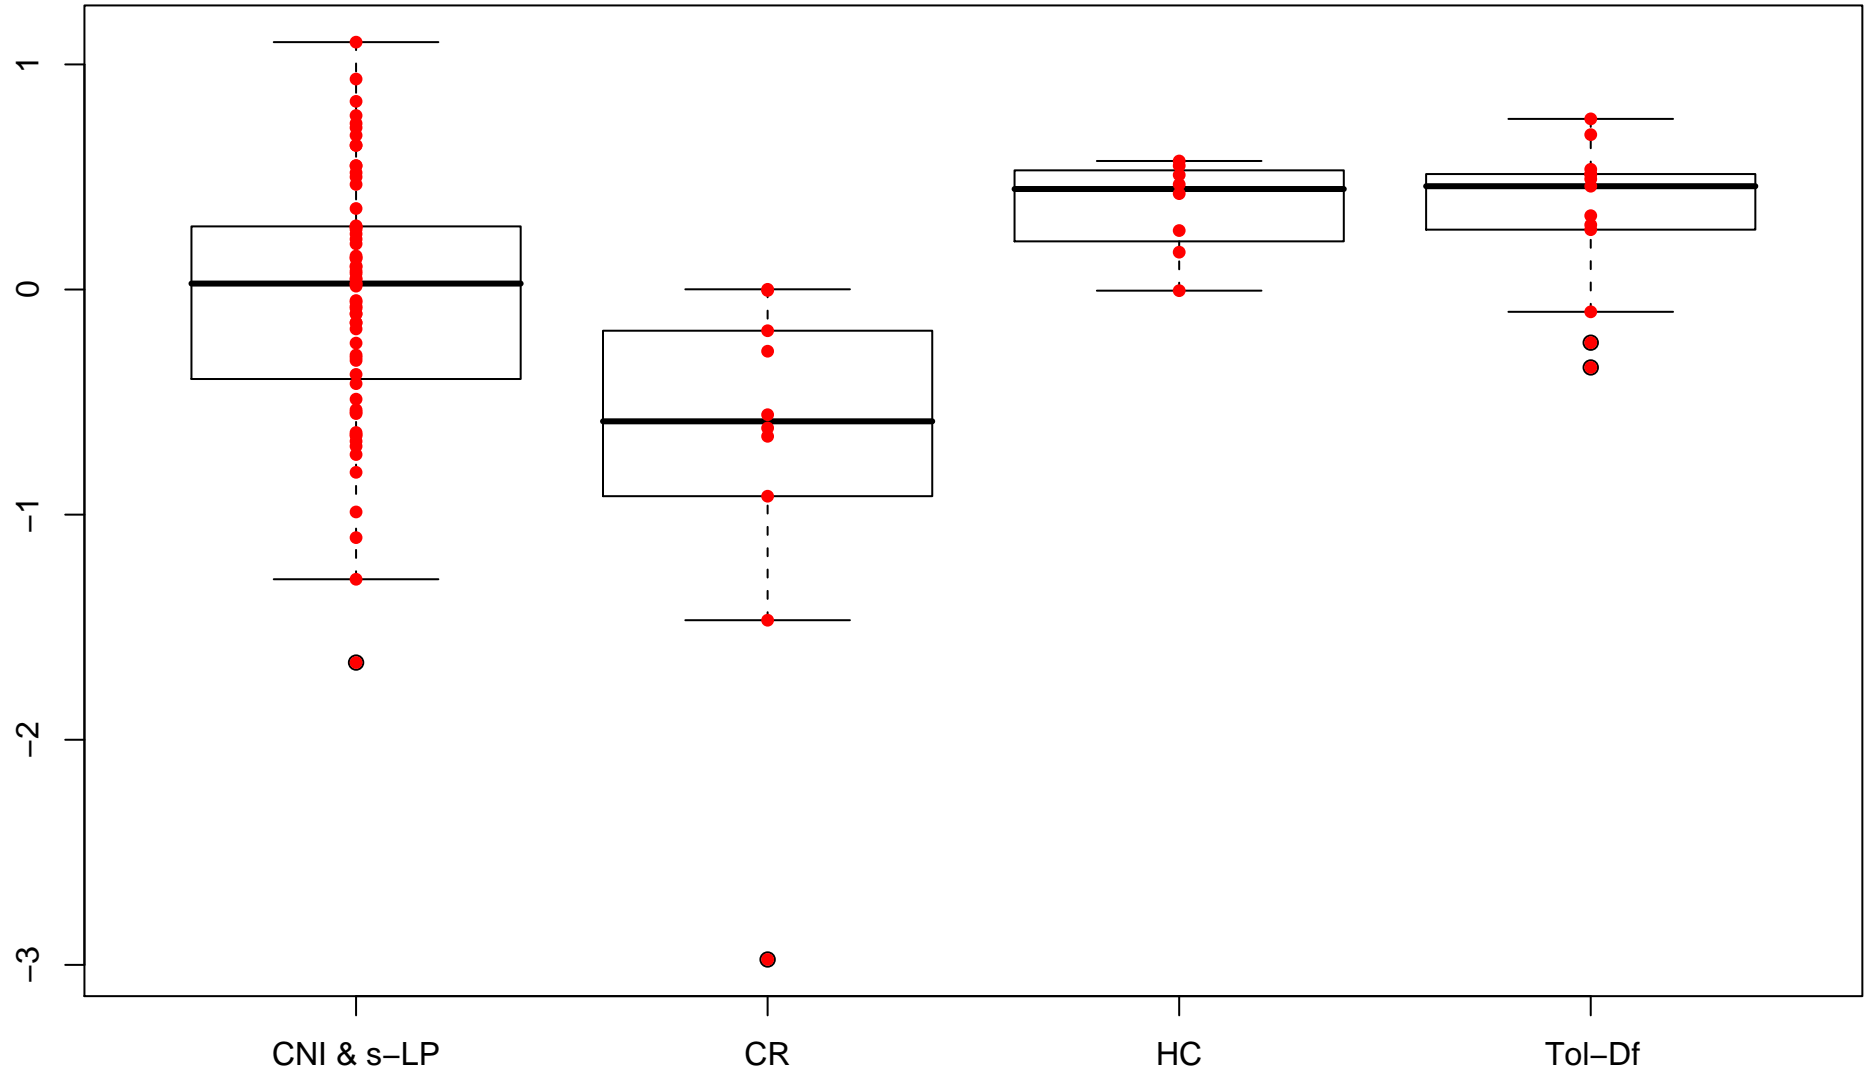

Rank 109 : NGEF  
0.00019888

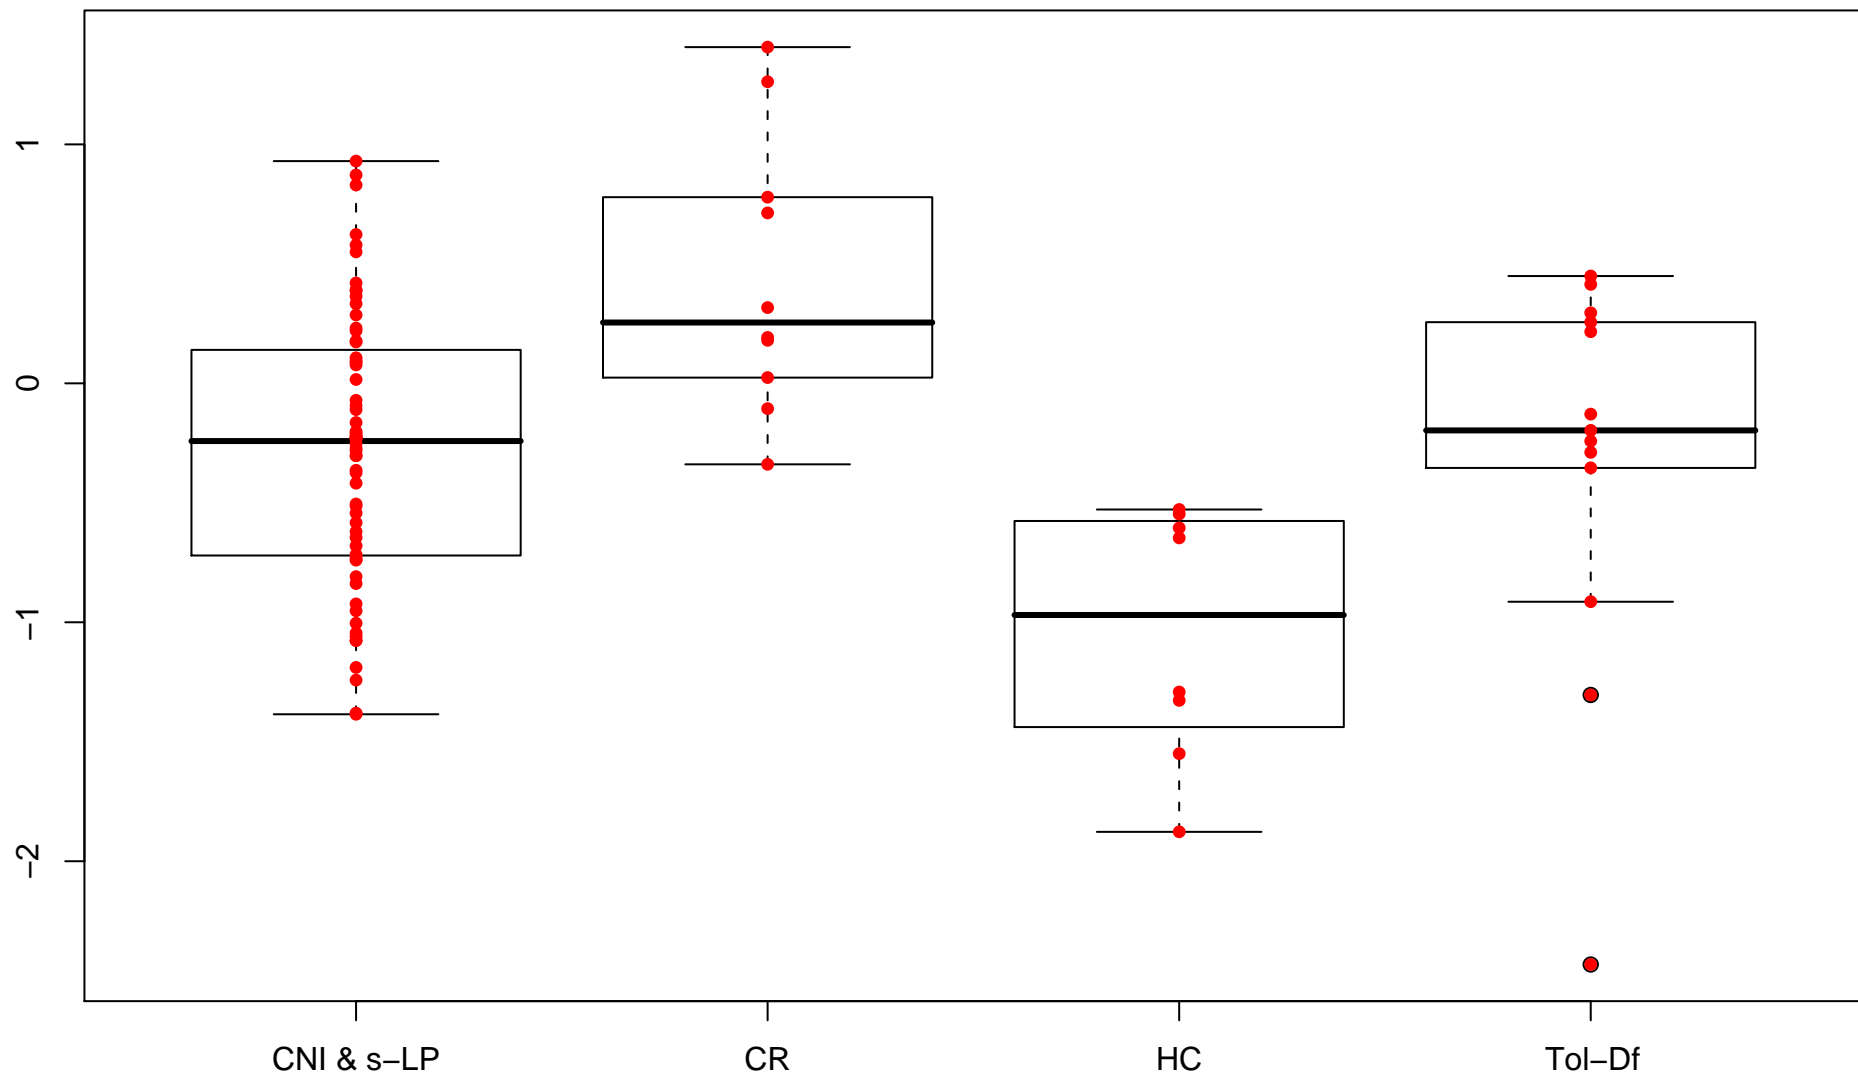

Rank 110 : TNFAIP6  
0.00020038

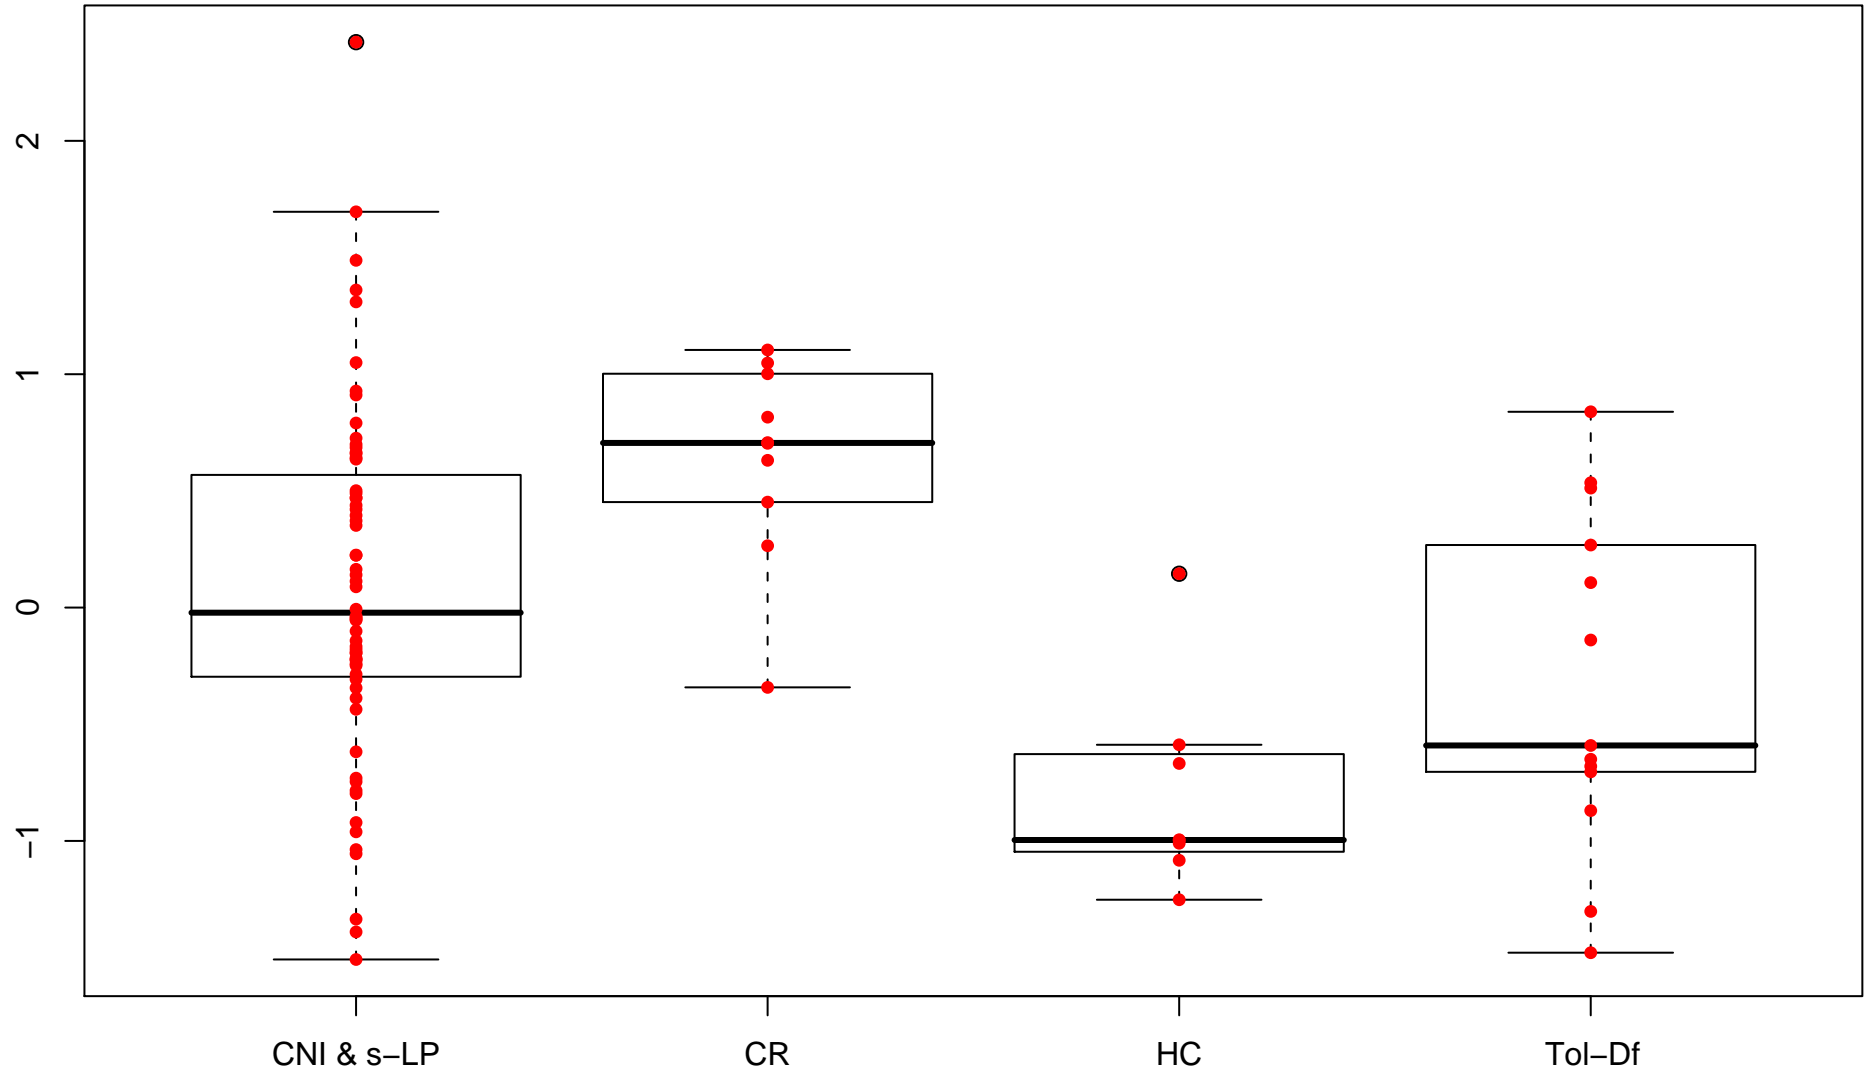

Rank 111 : RAX  
0.00020123

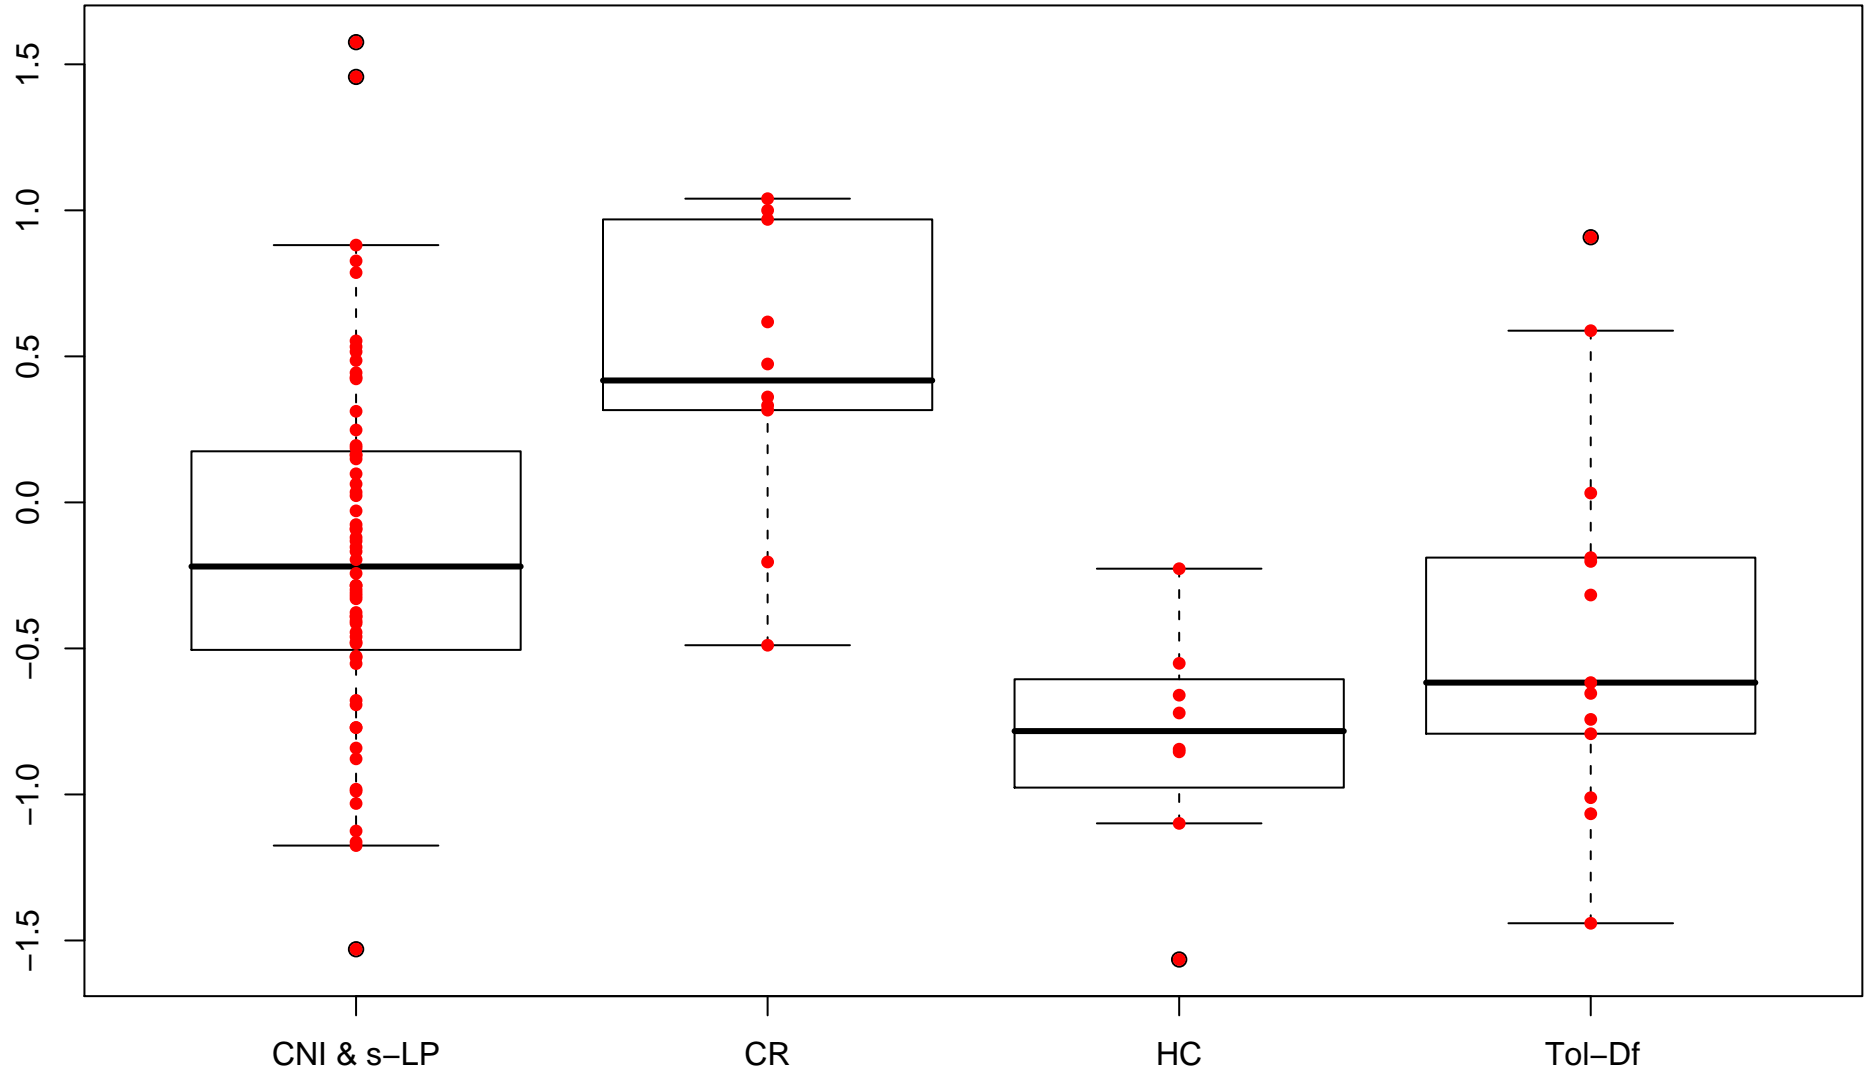

Rank 112 : TMTC3  
0.00020146

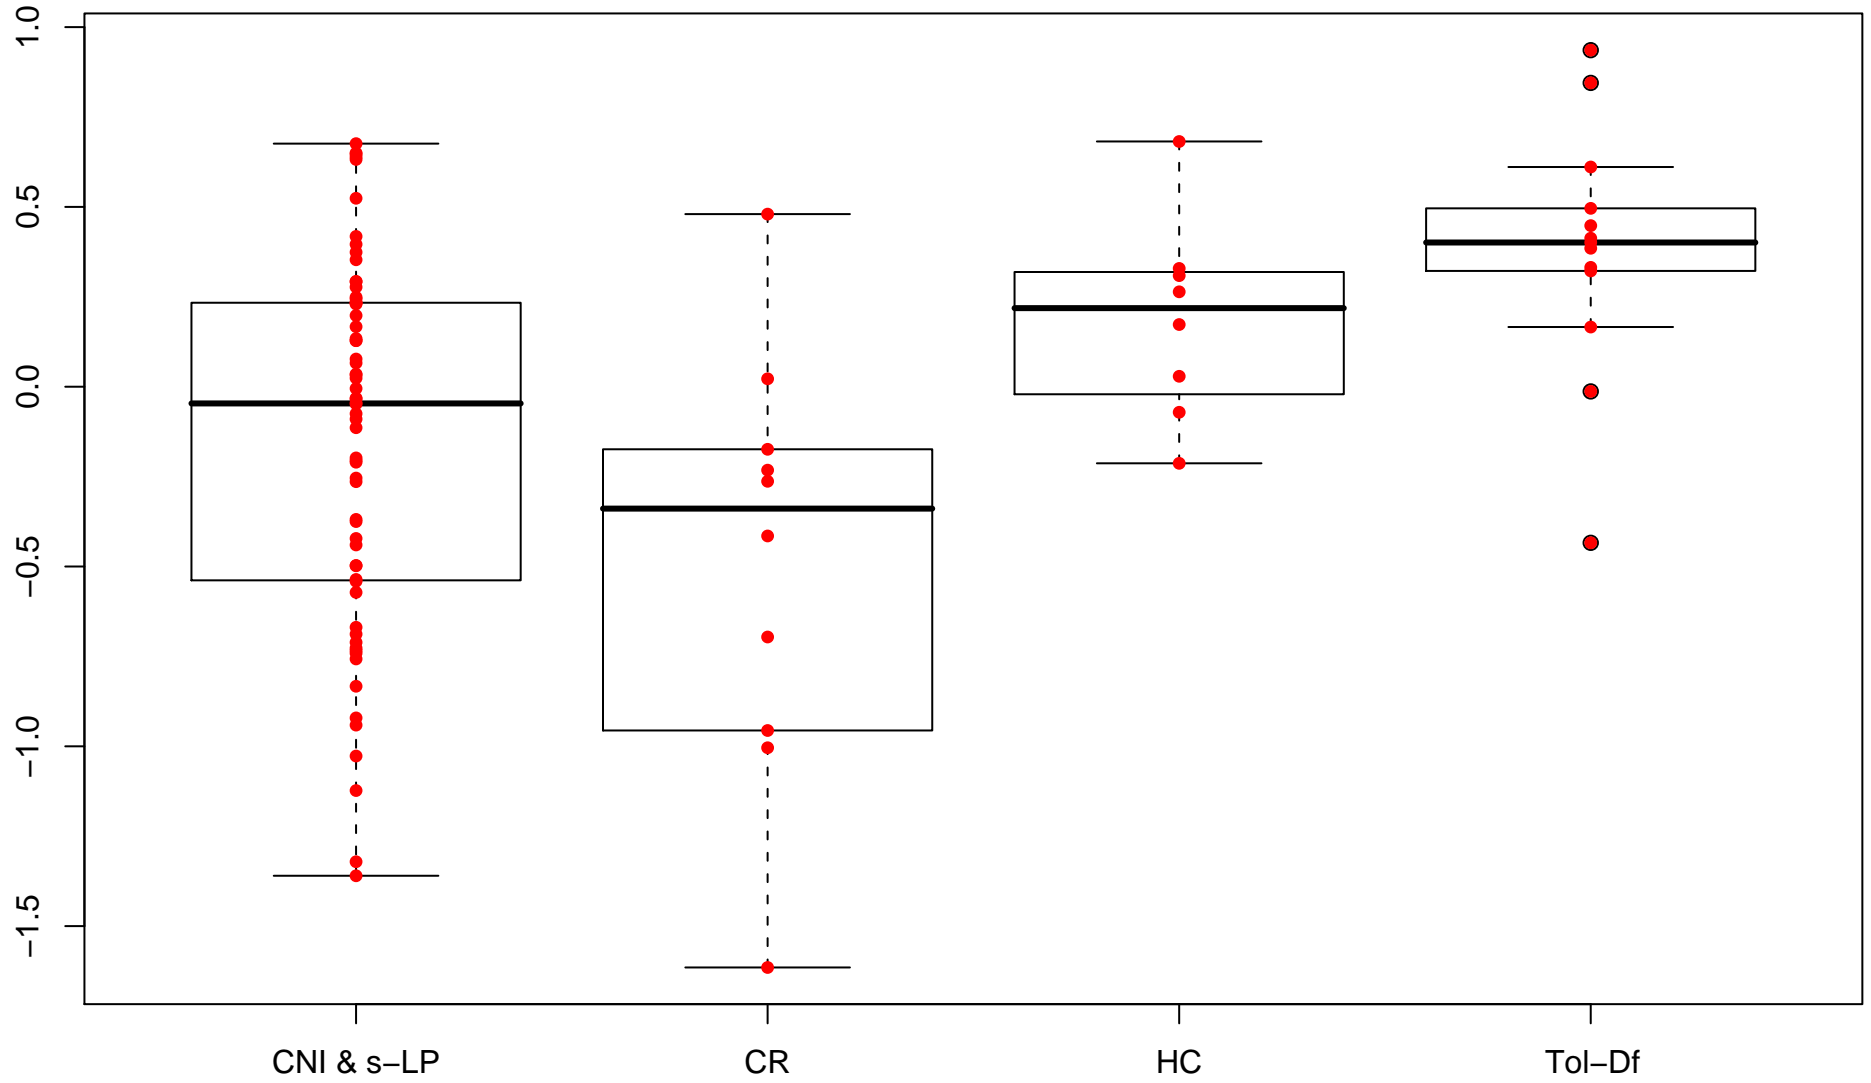

Rank 113 : MNAT1  
0.00020319

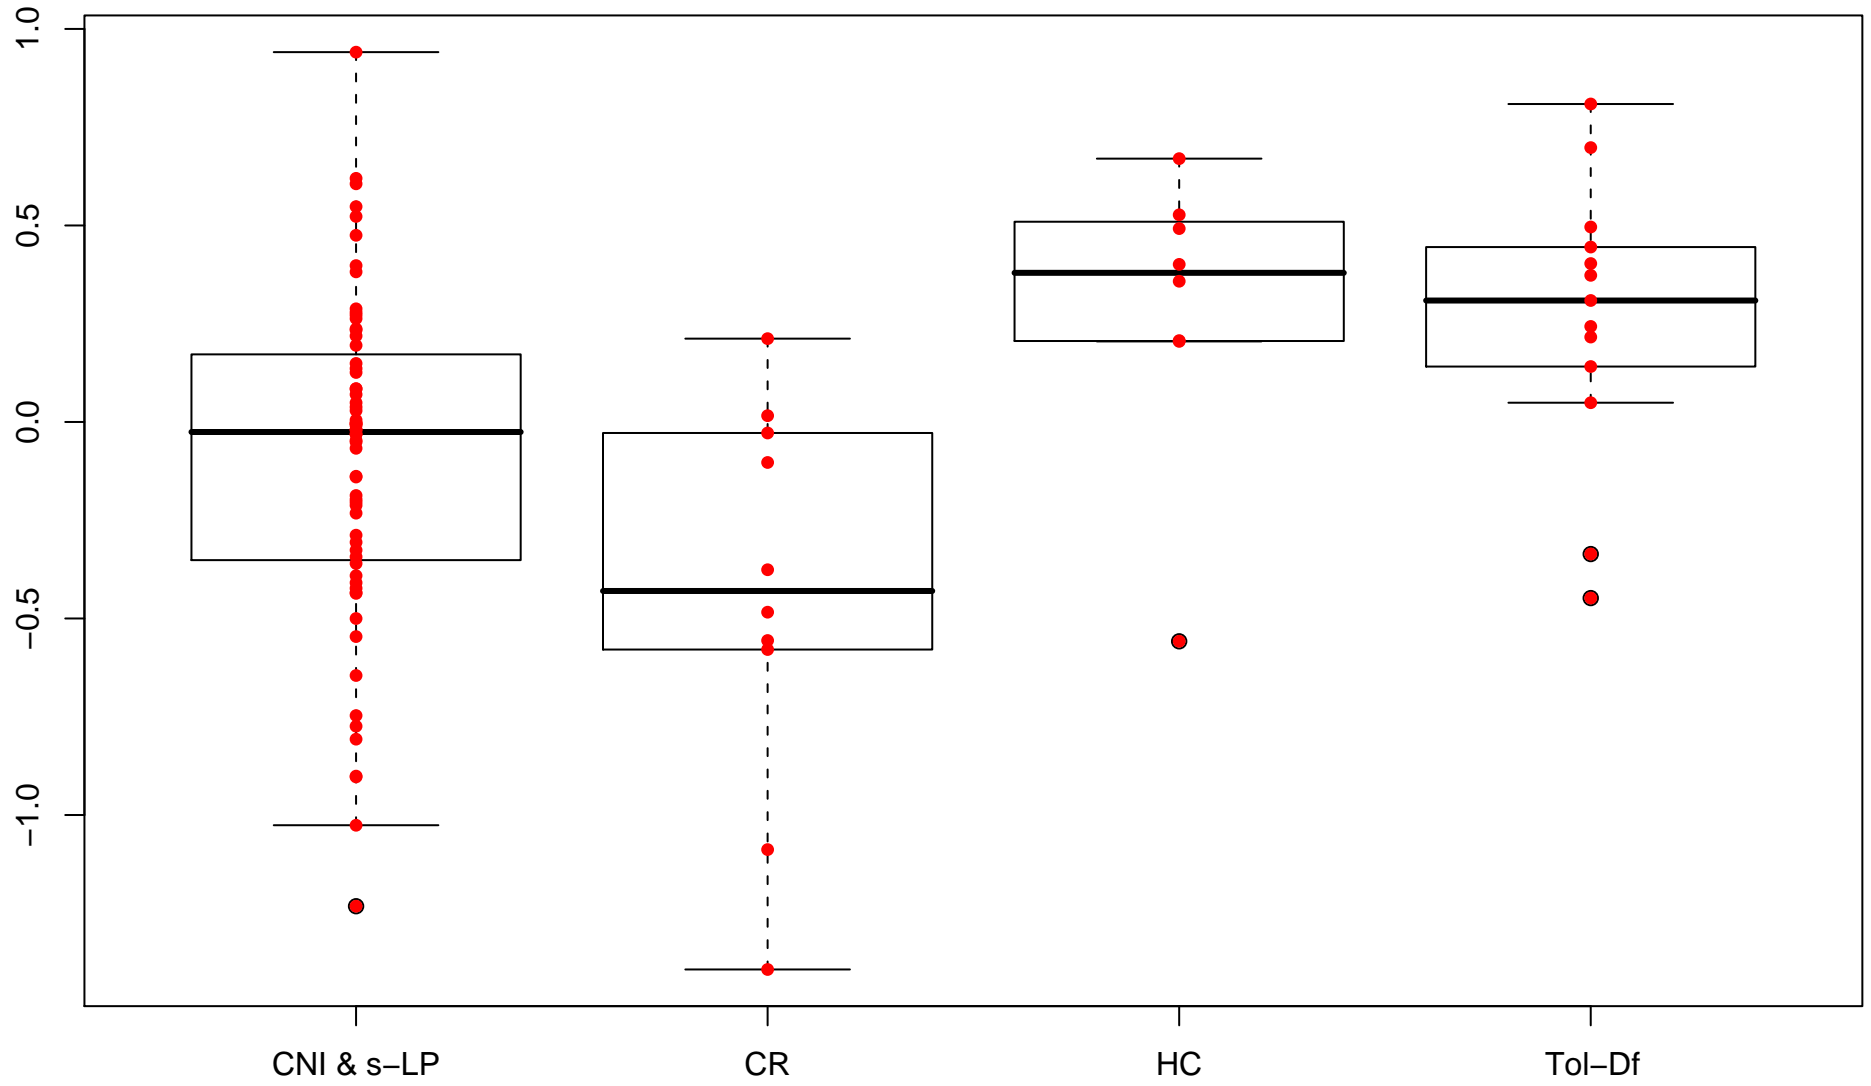

Rank 114 : ZNF181  
0.00020441

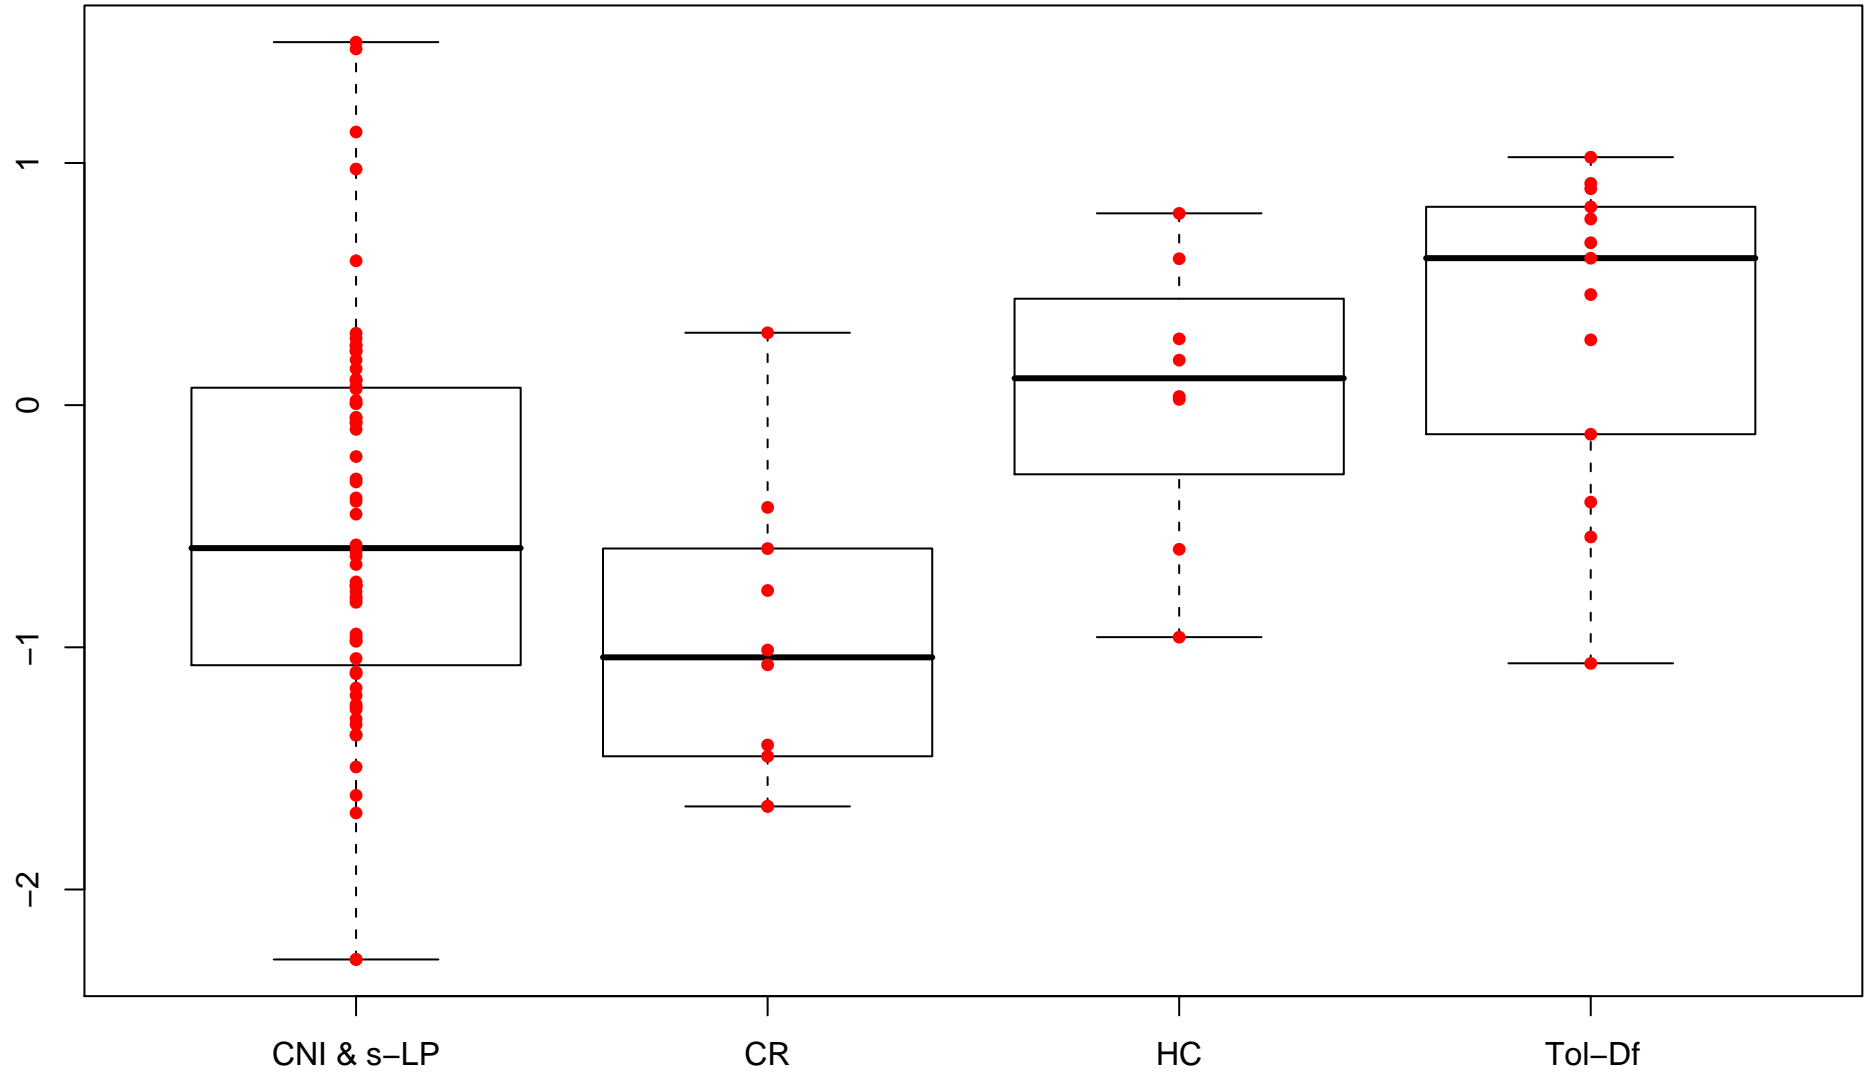



Rank 115 : MYC  
0.00020703

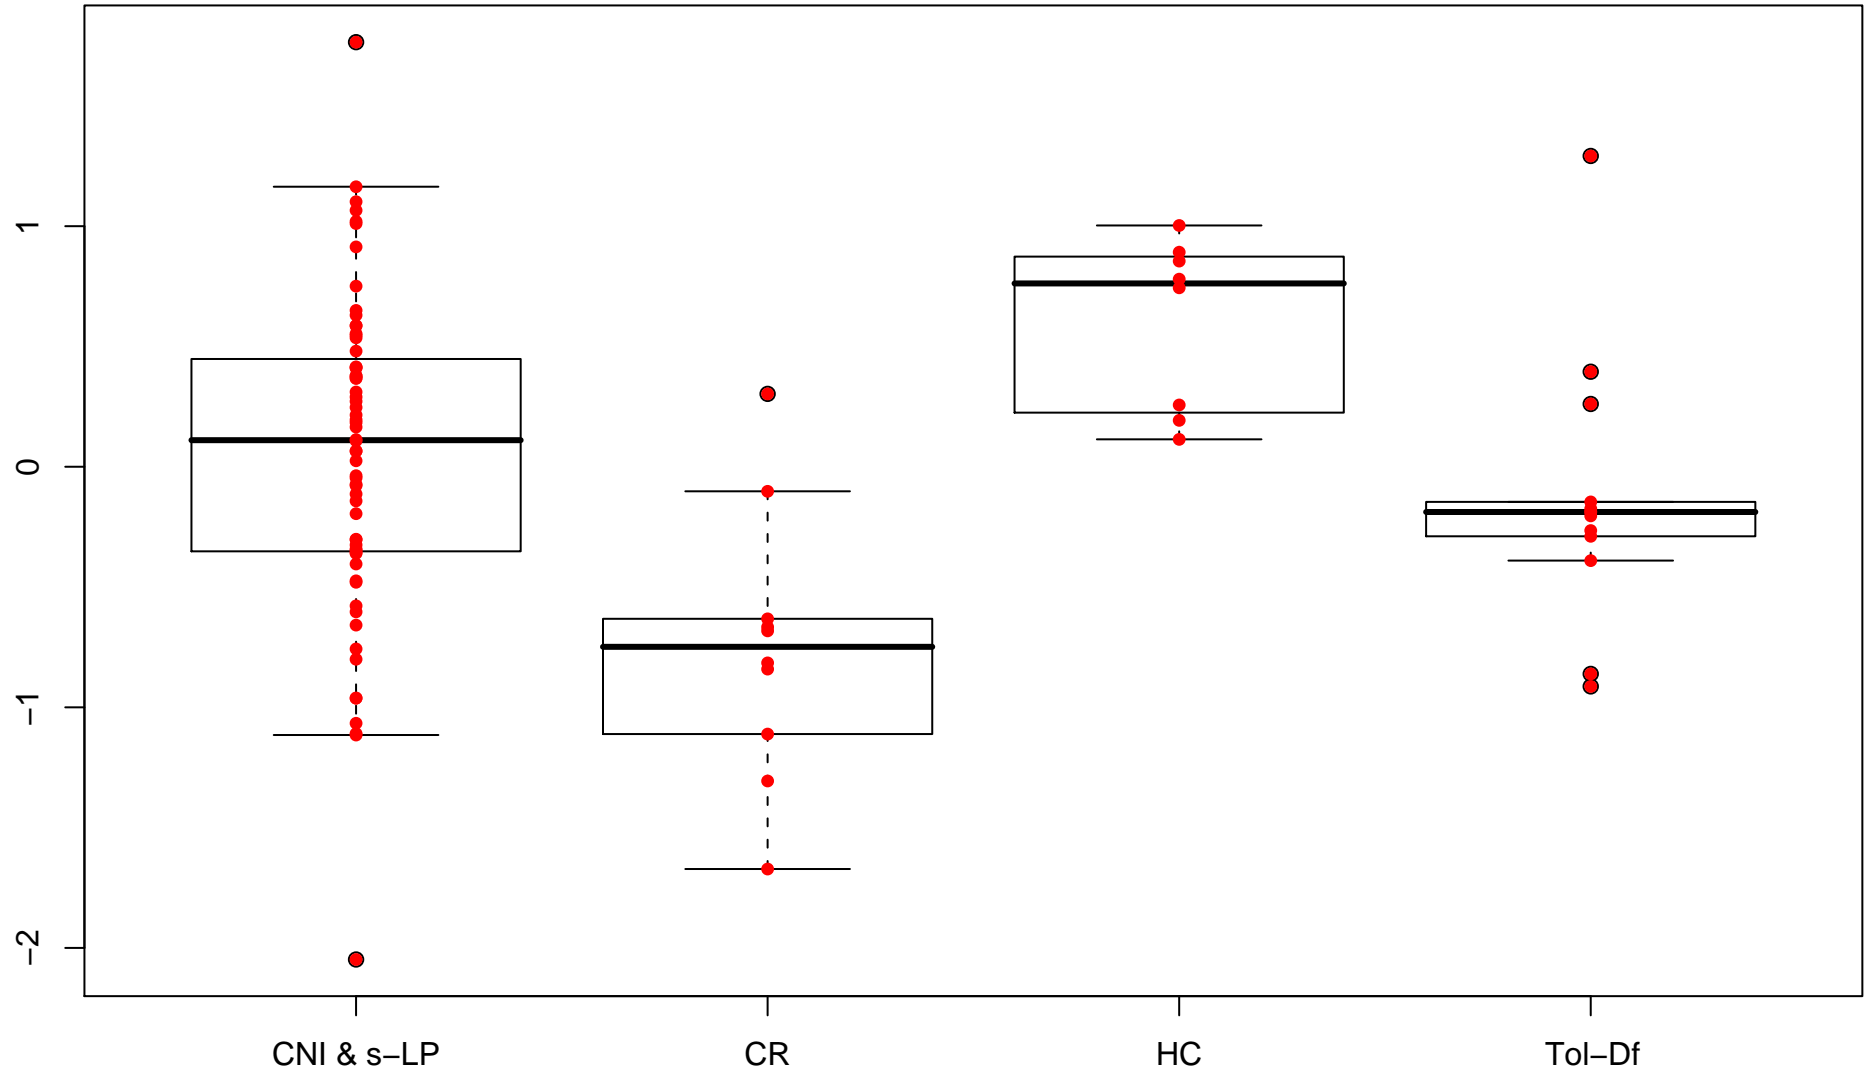

Rank 116 : CLEC5A  
0.0002092

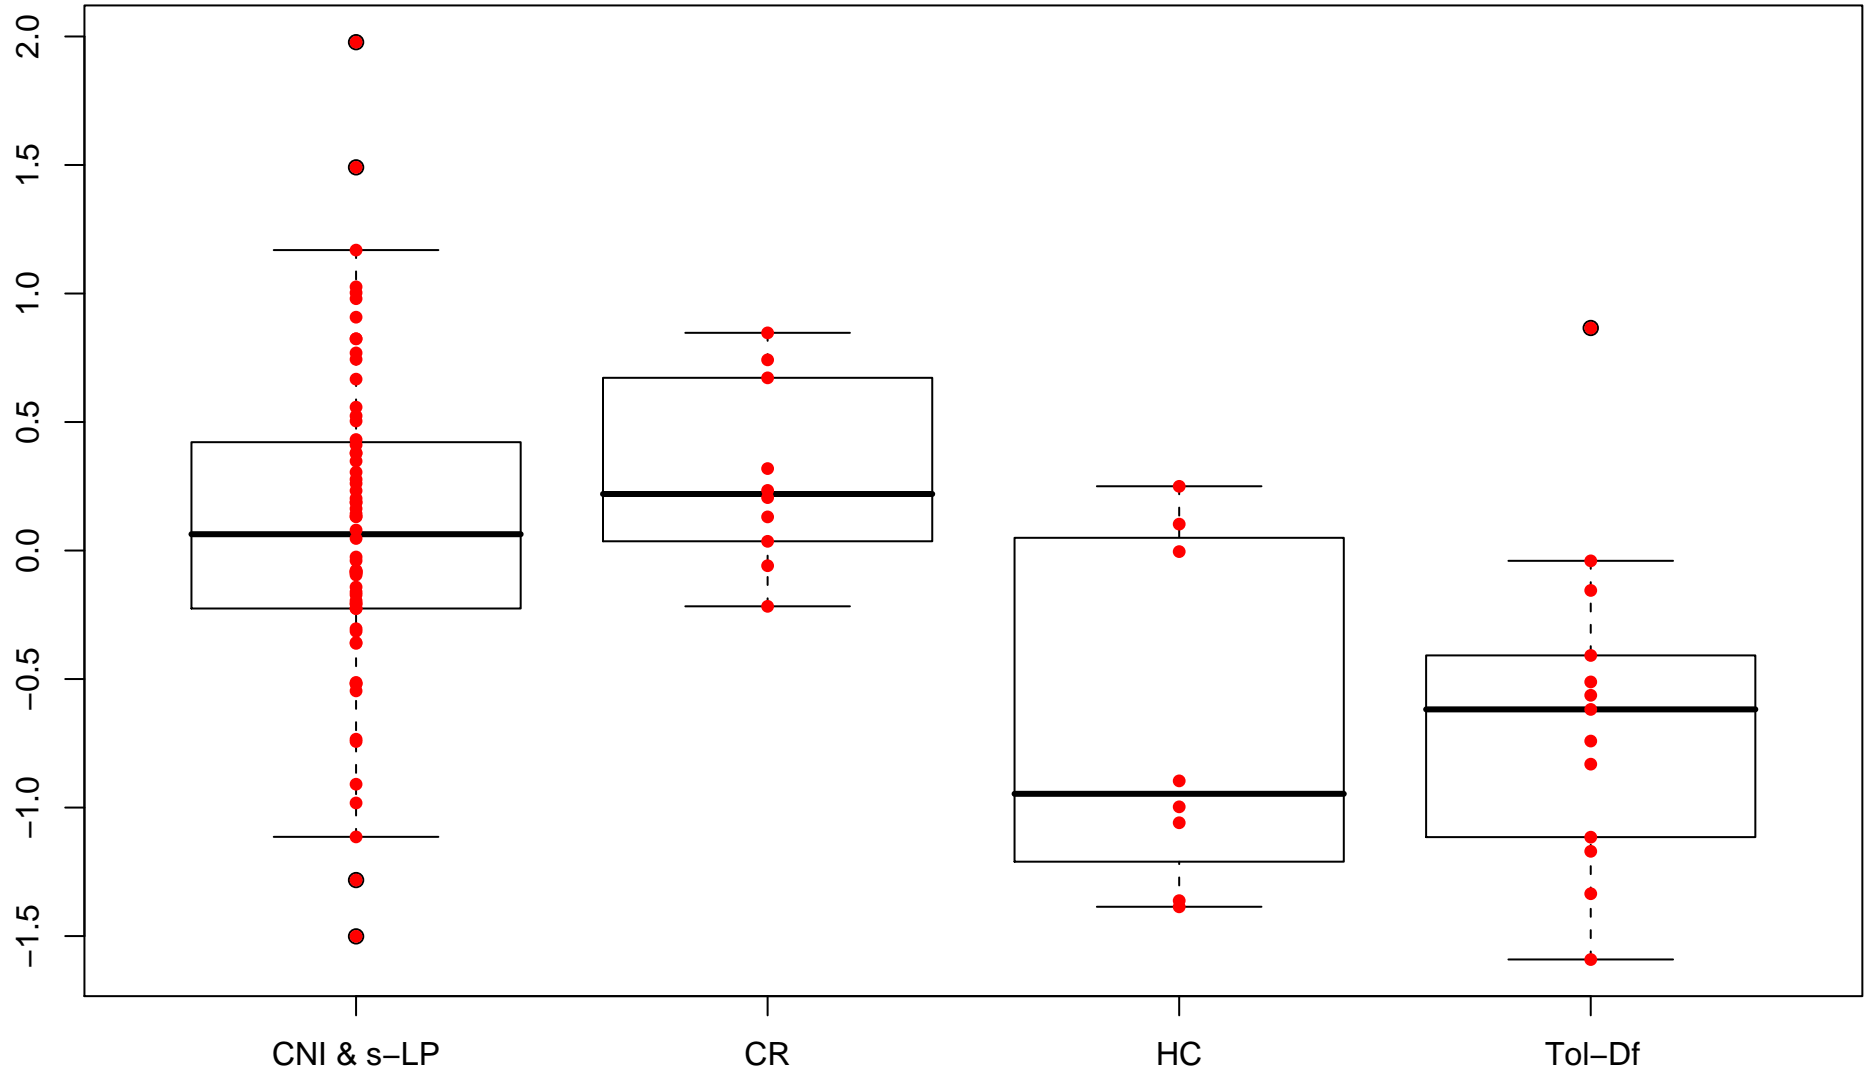

Rank 117 : GPX7  
0.00022204

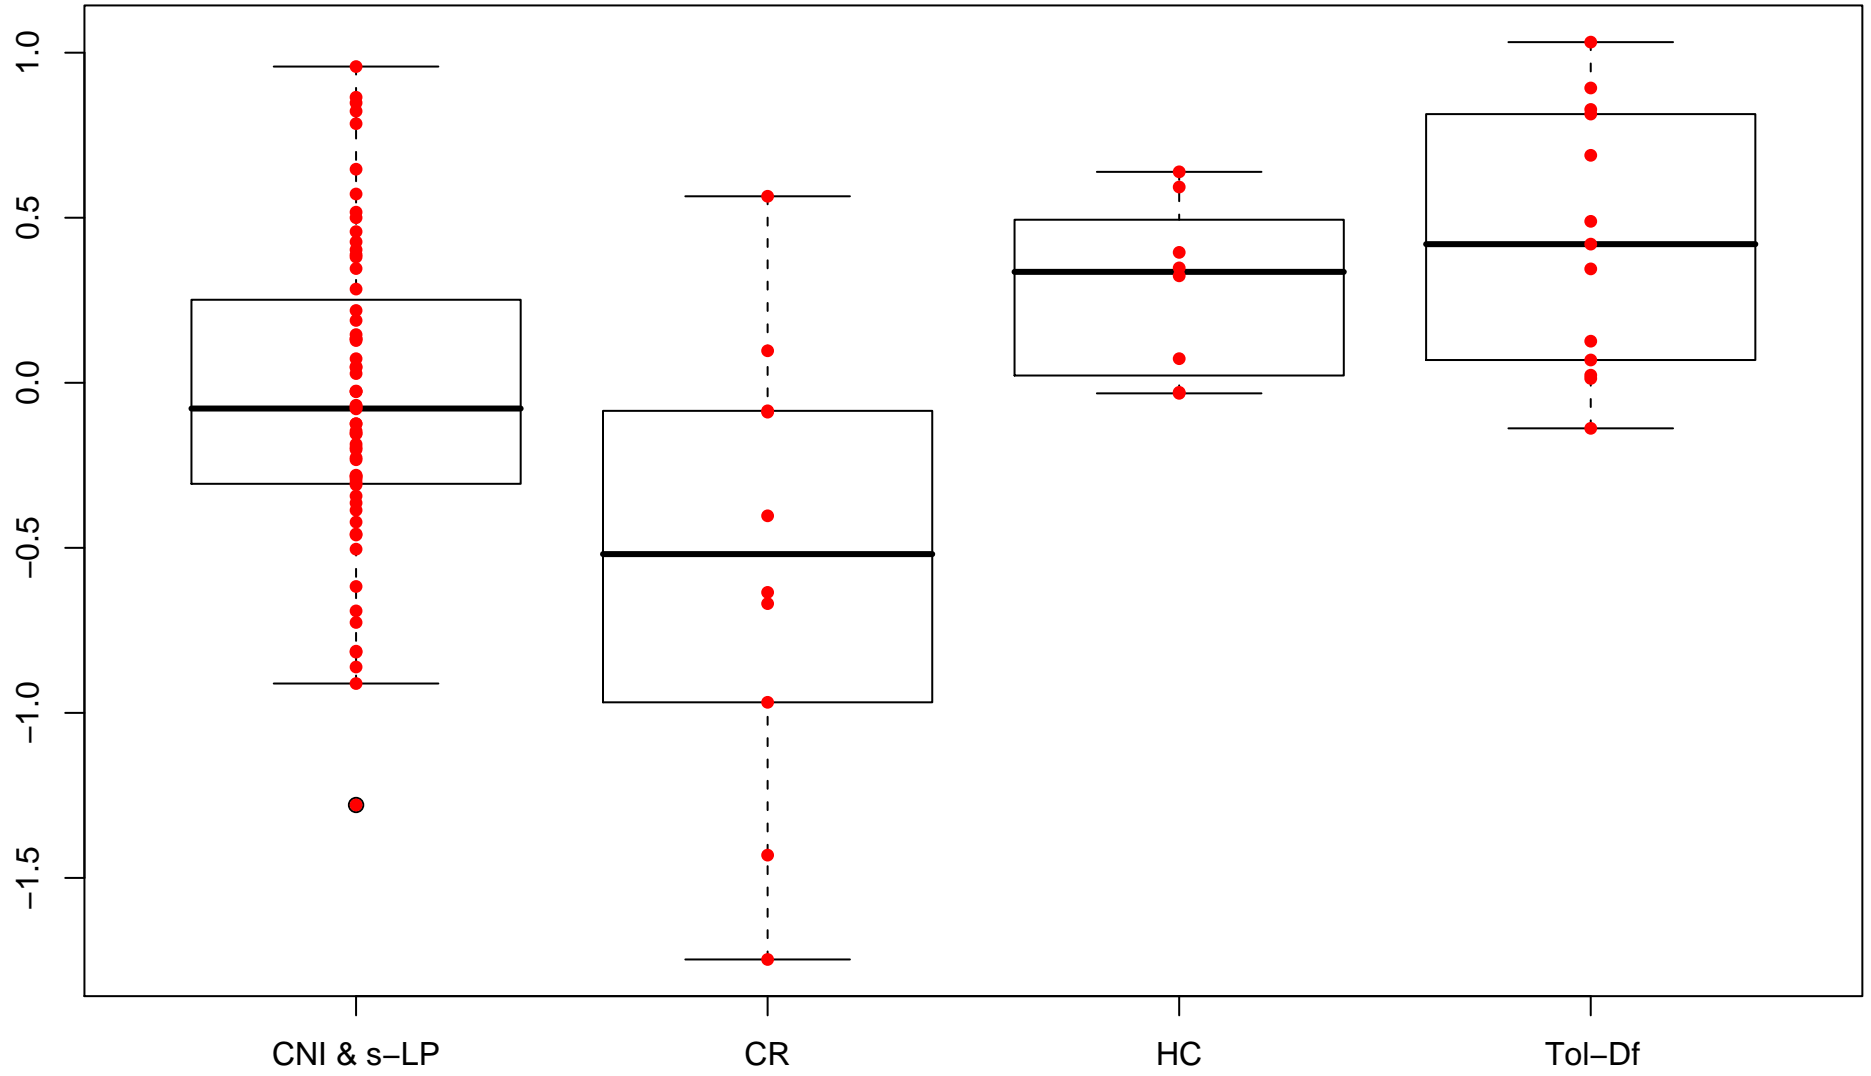

Rank 118 : HPN  
0.00022275

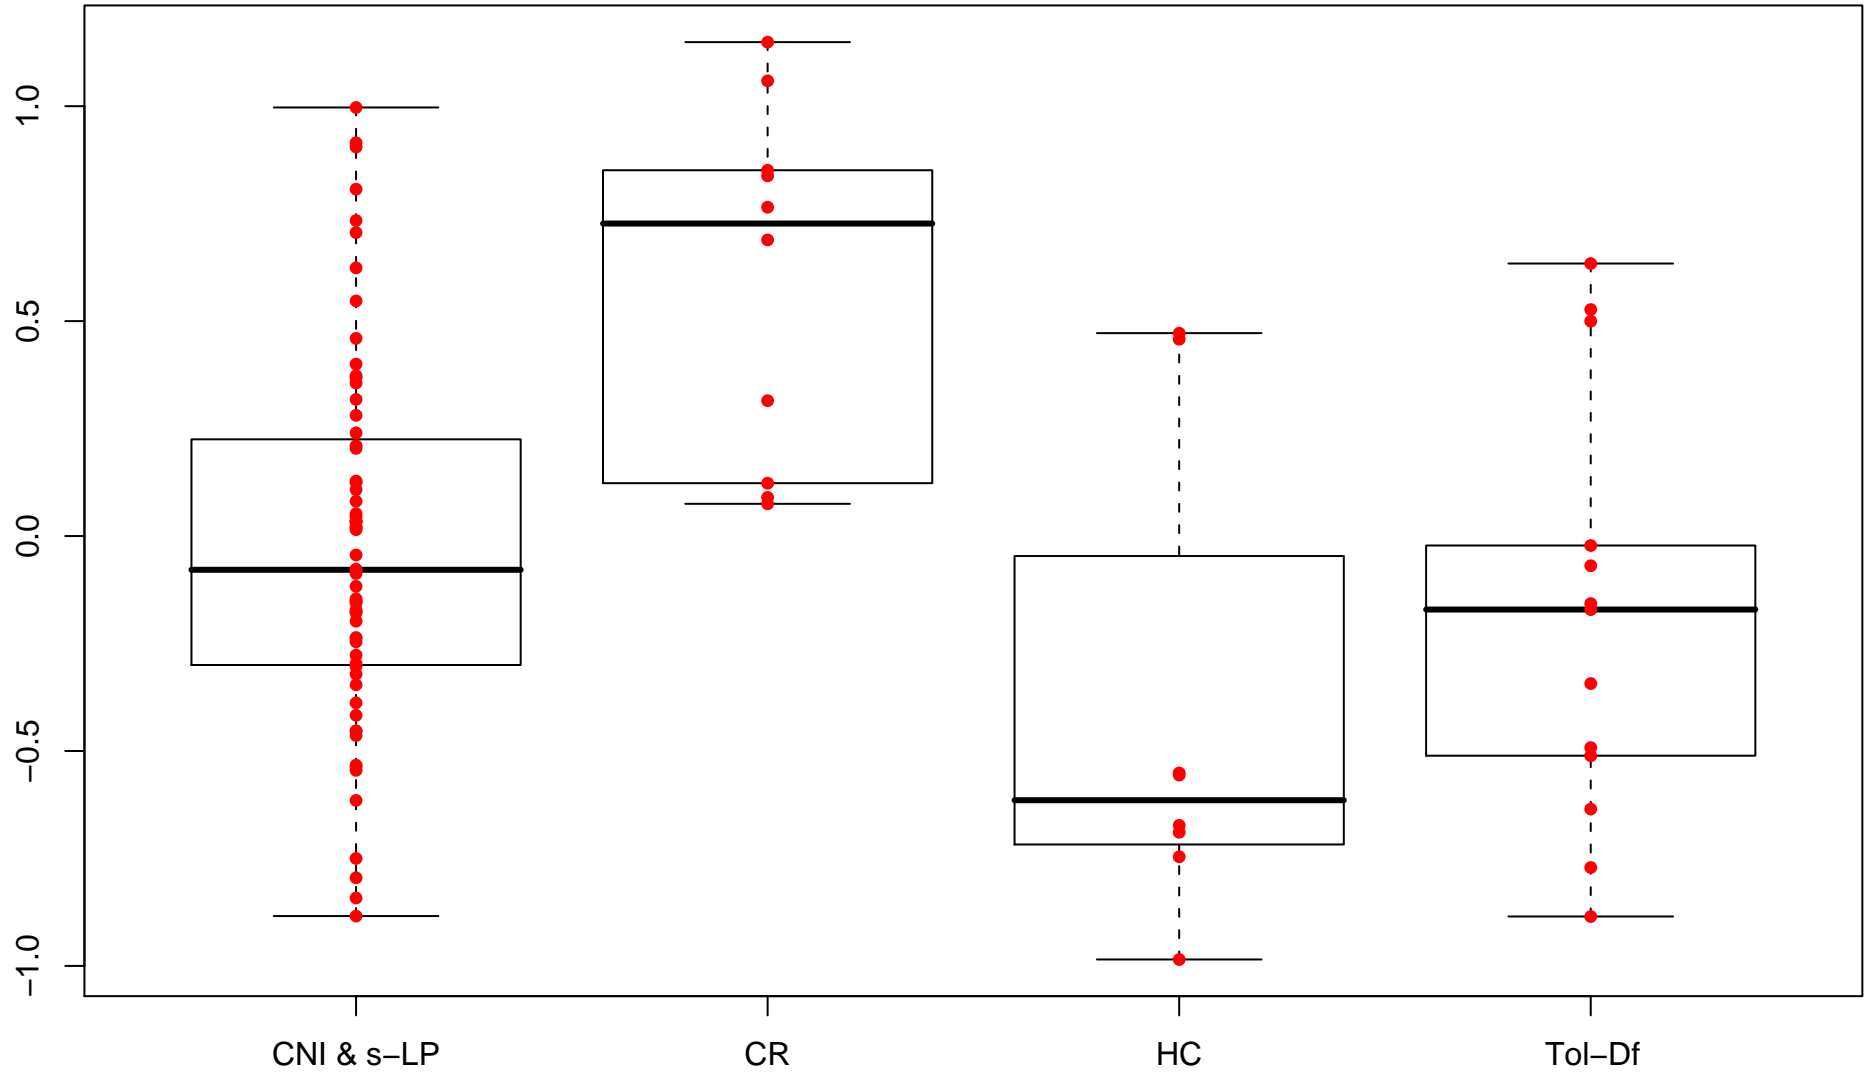

Rank 119 : PPIL3  
0.00022426

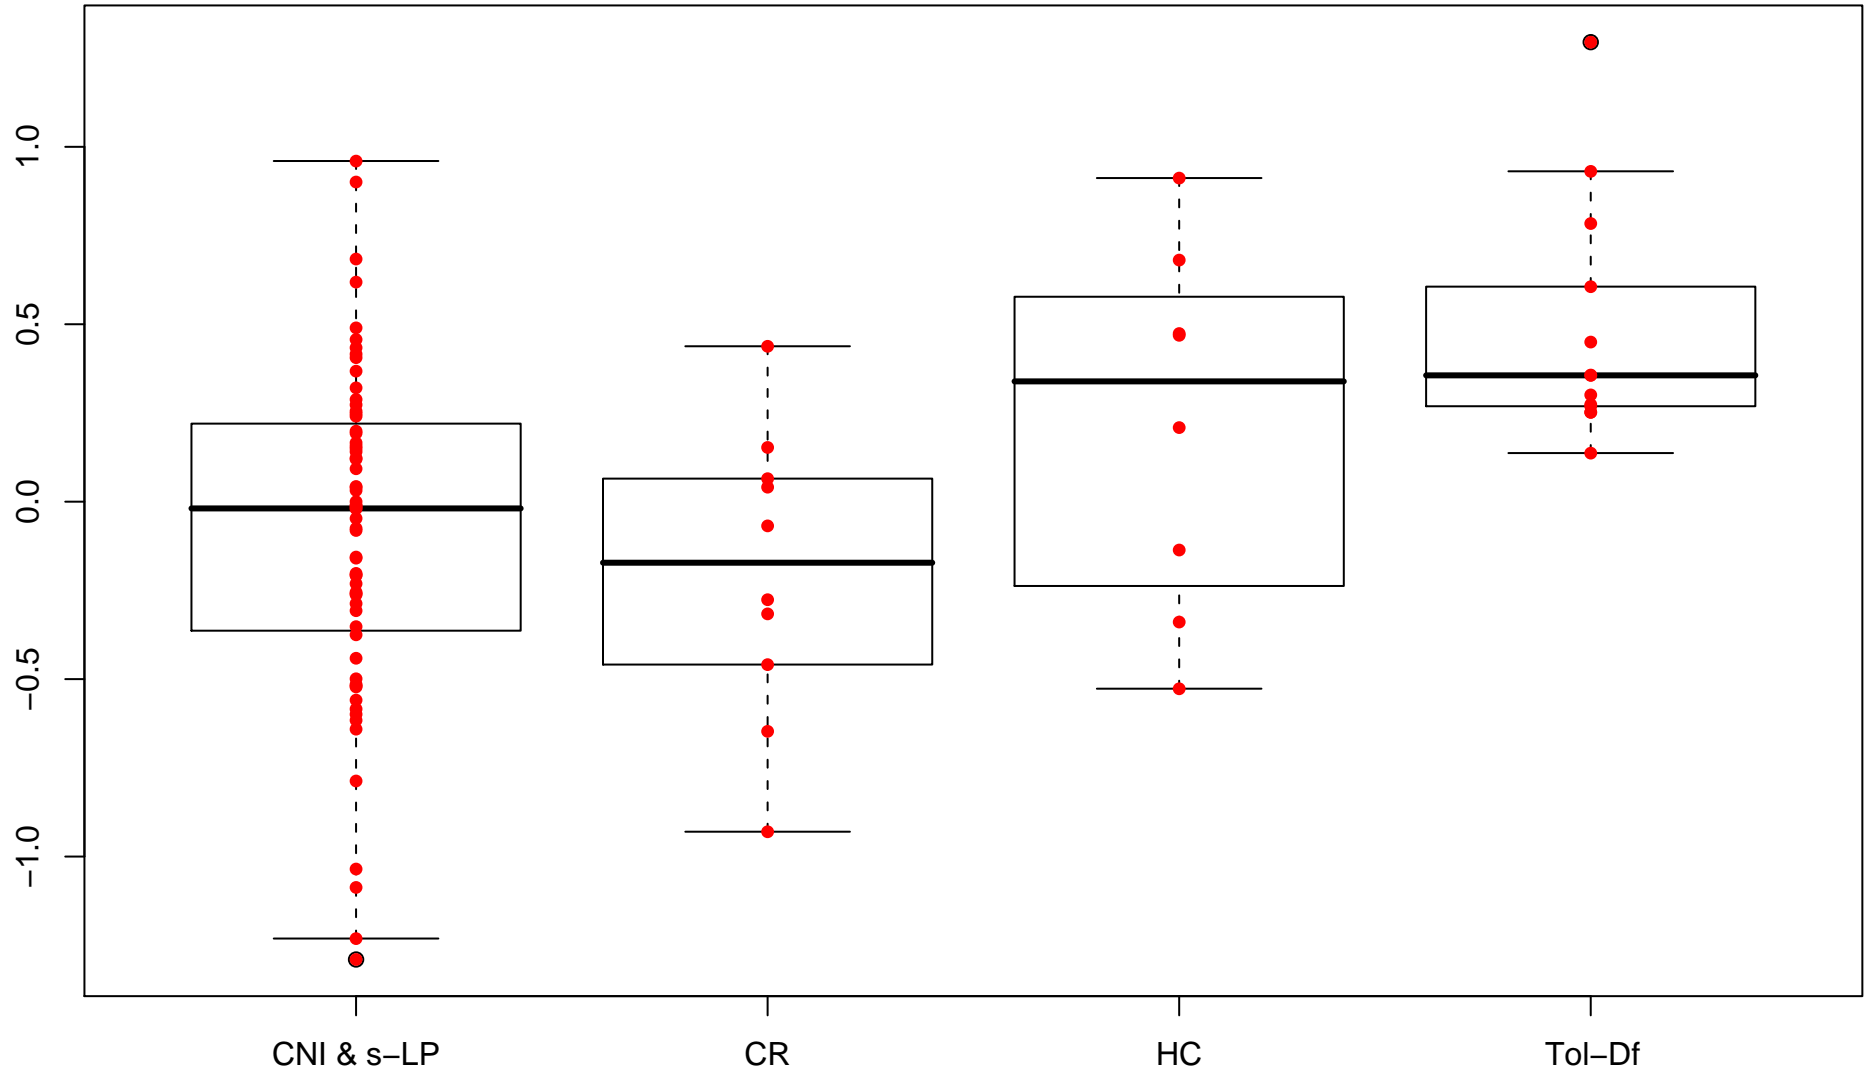

Rank 120 : THUMPD1  
0.00022539

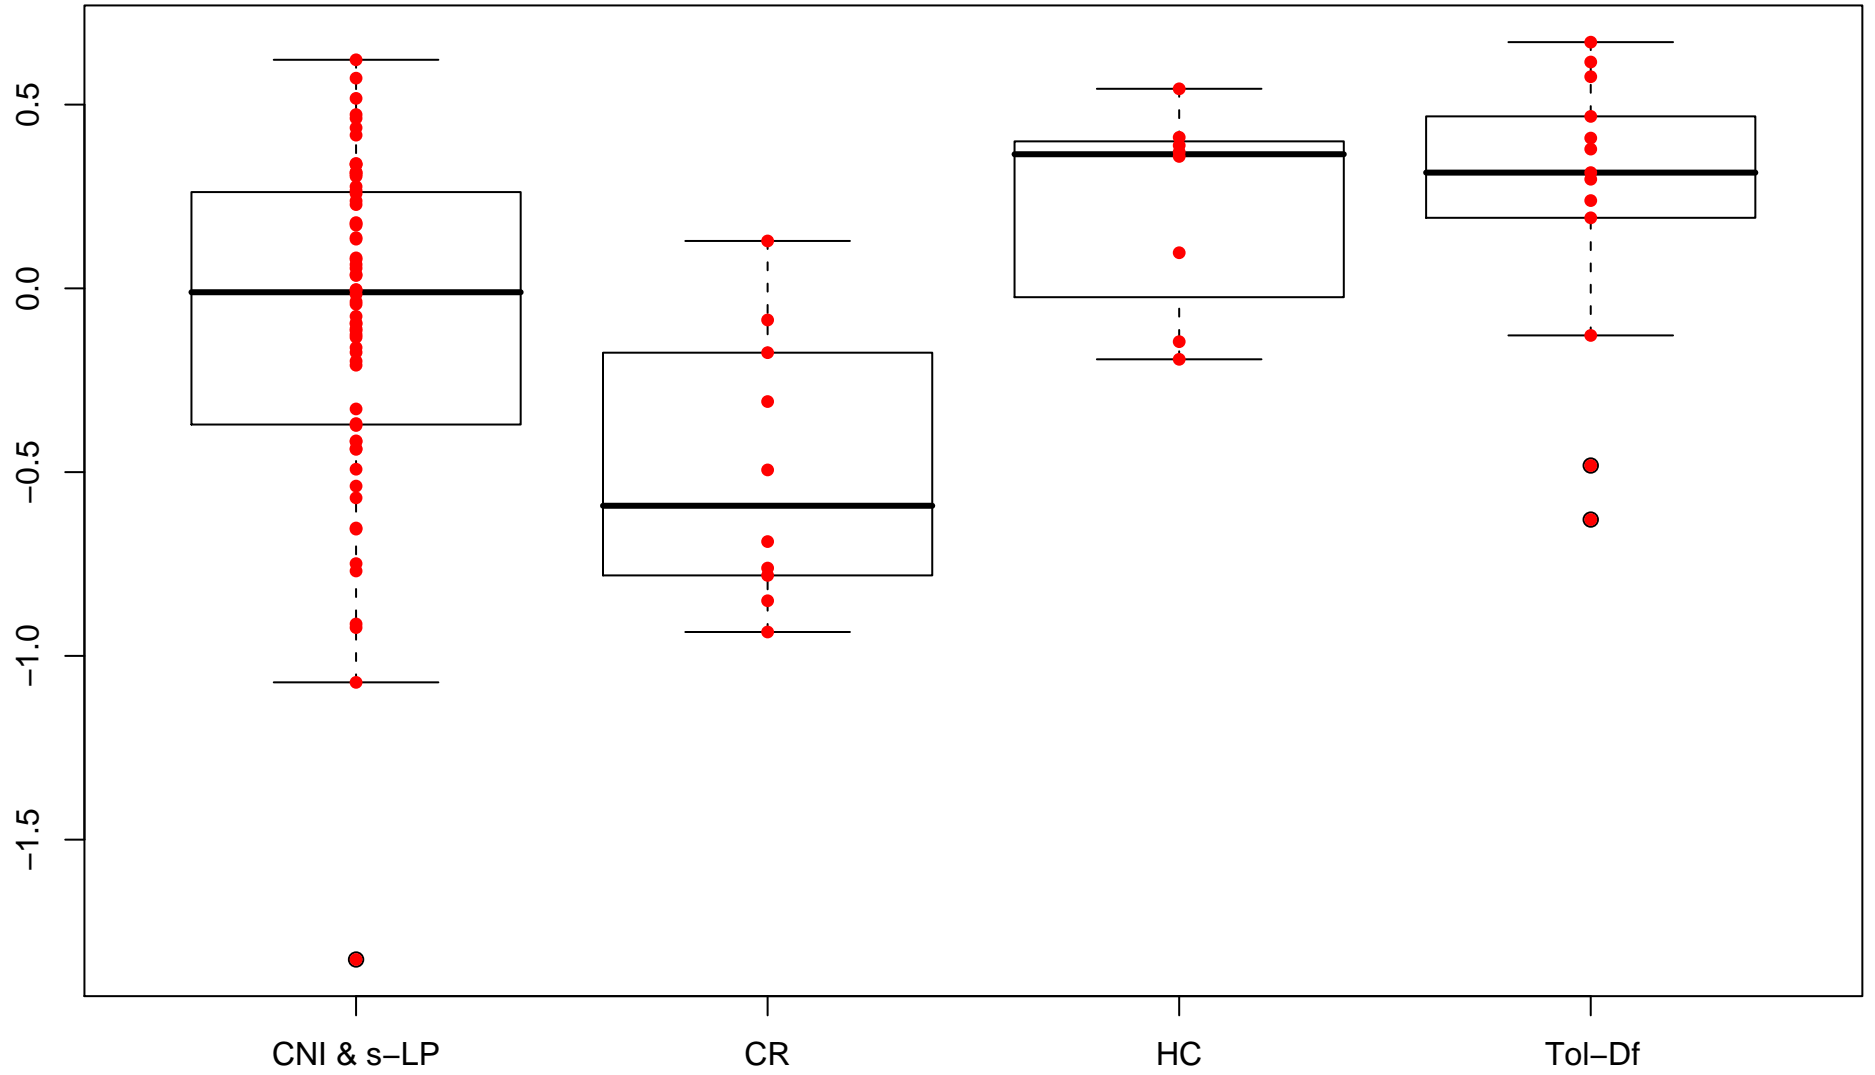

Rank 121 : MAD2L1  
0.00022985

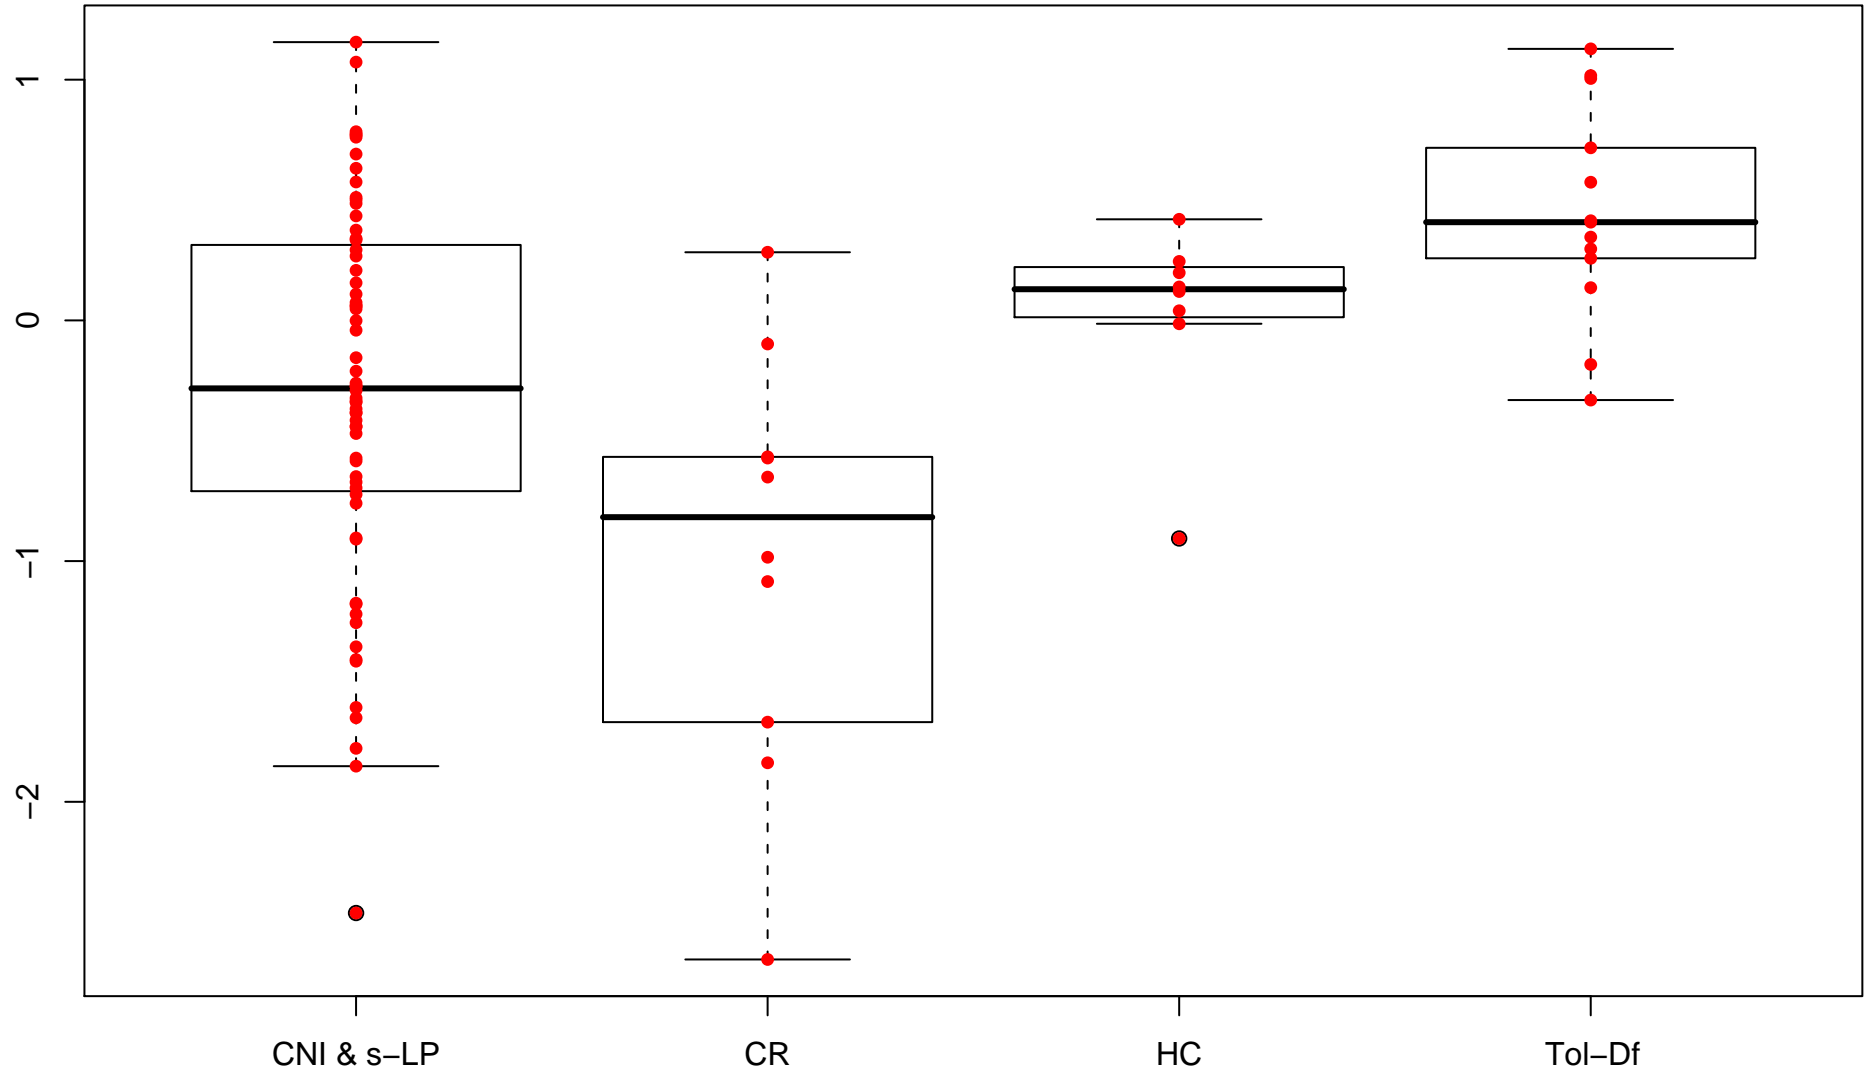

Rank 122 : SPTLC2  
0.00023099

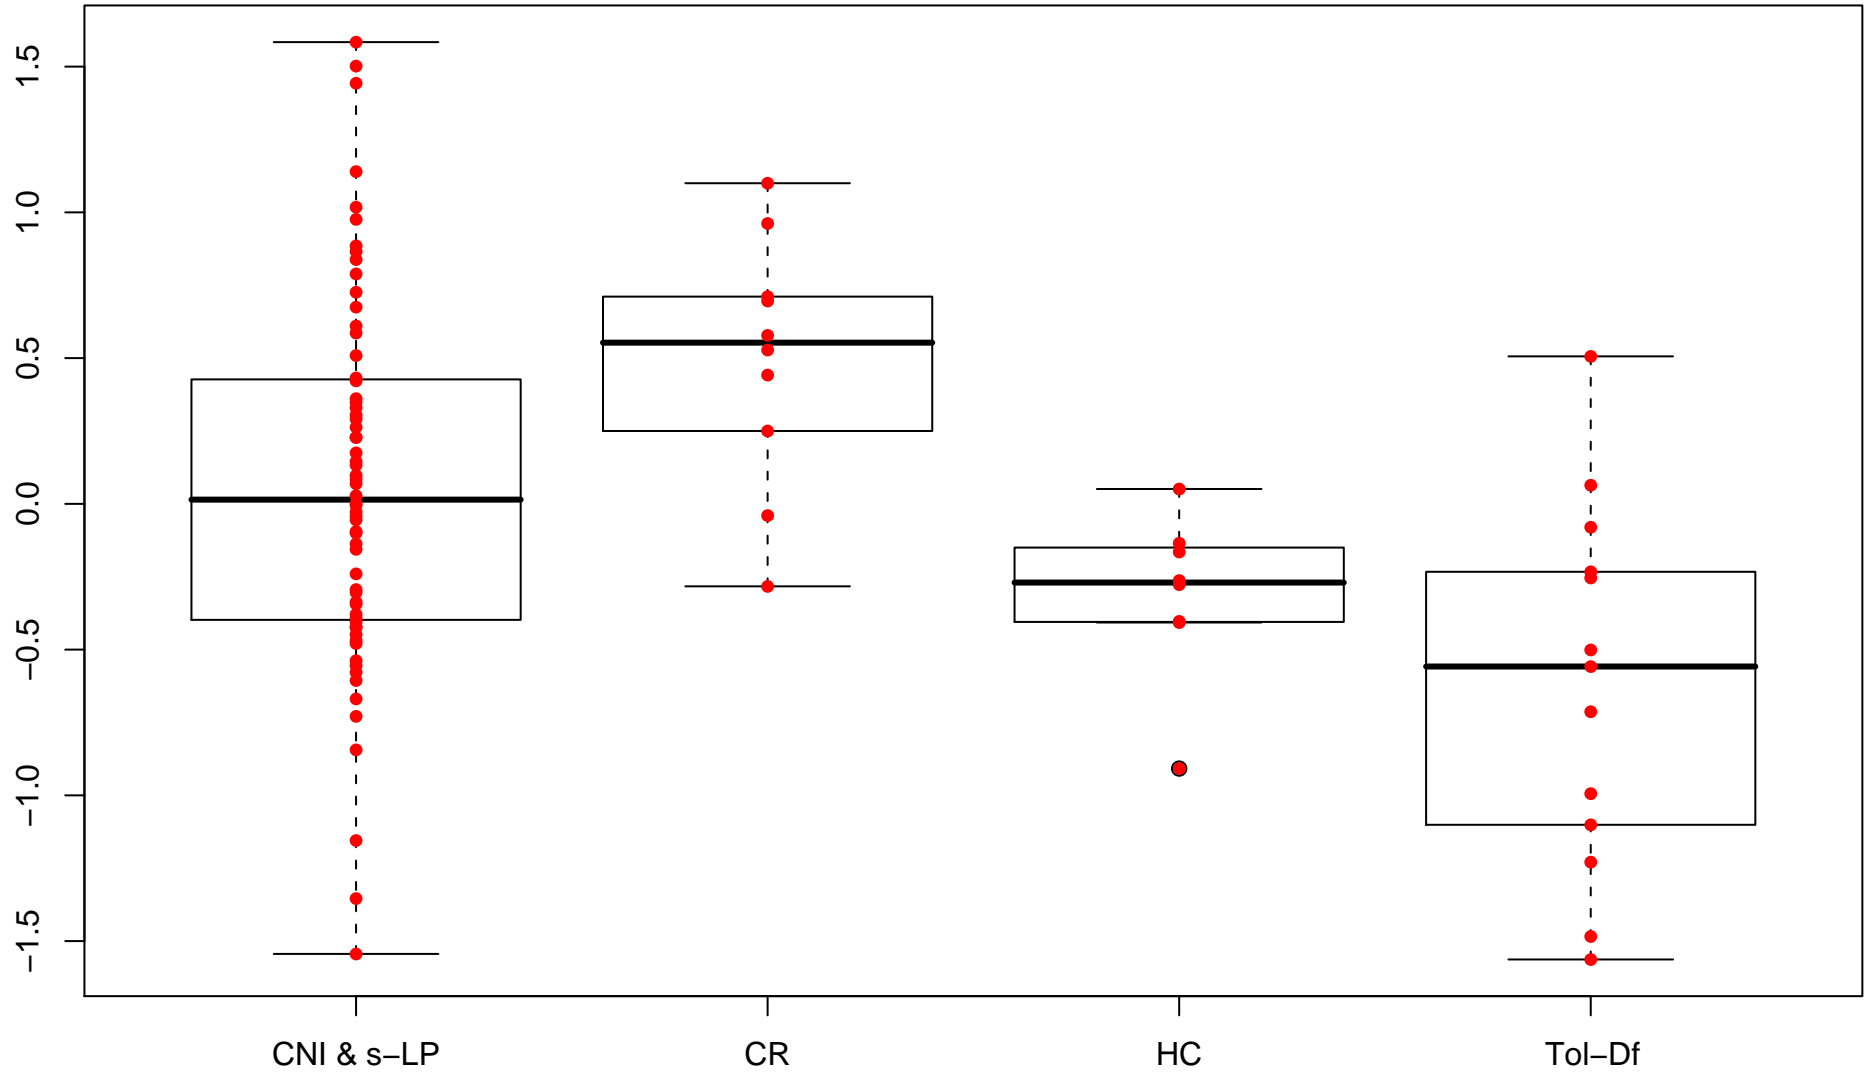



Rank 123 : THAP2  
0.00023455

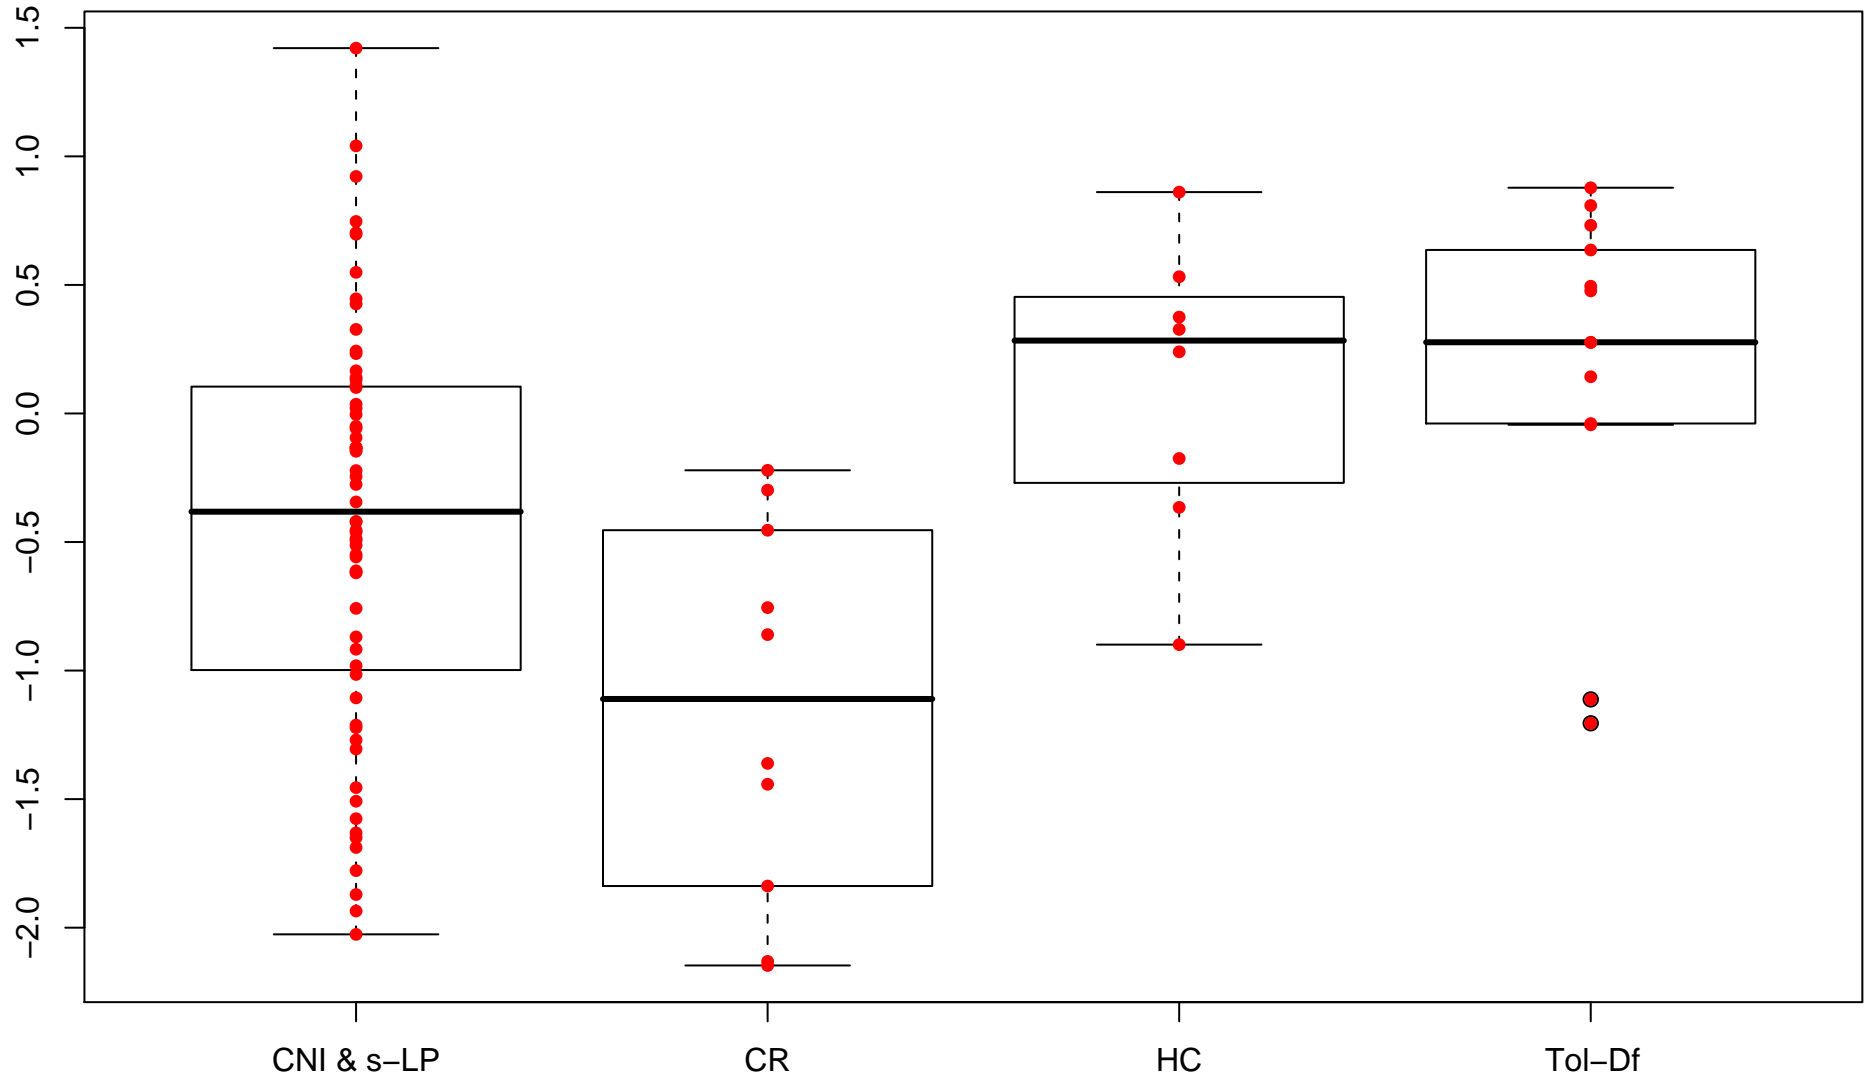

Rank 124 : CRYAB  
0.00024539

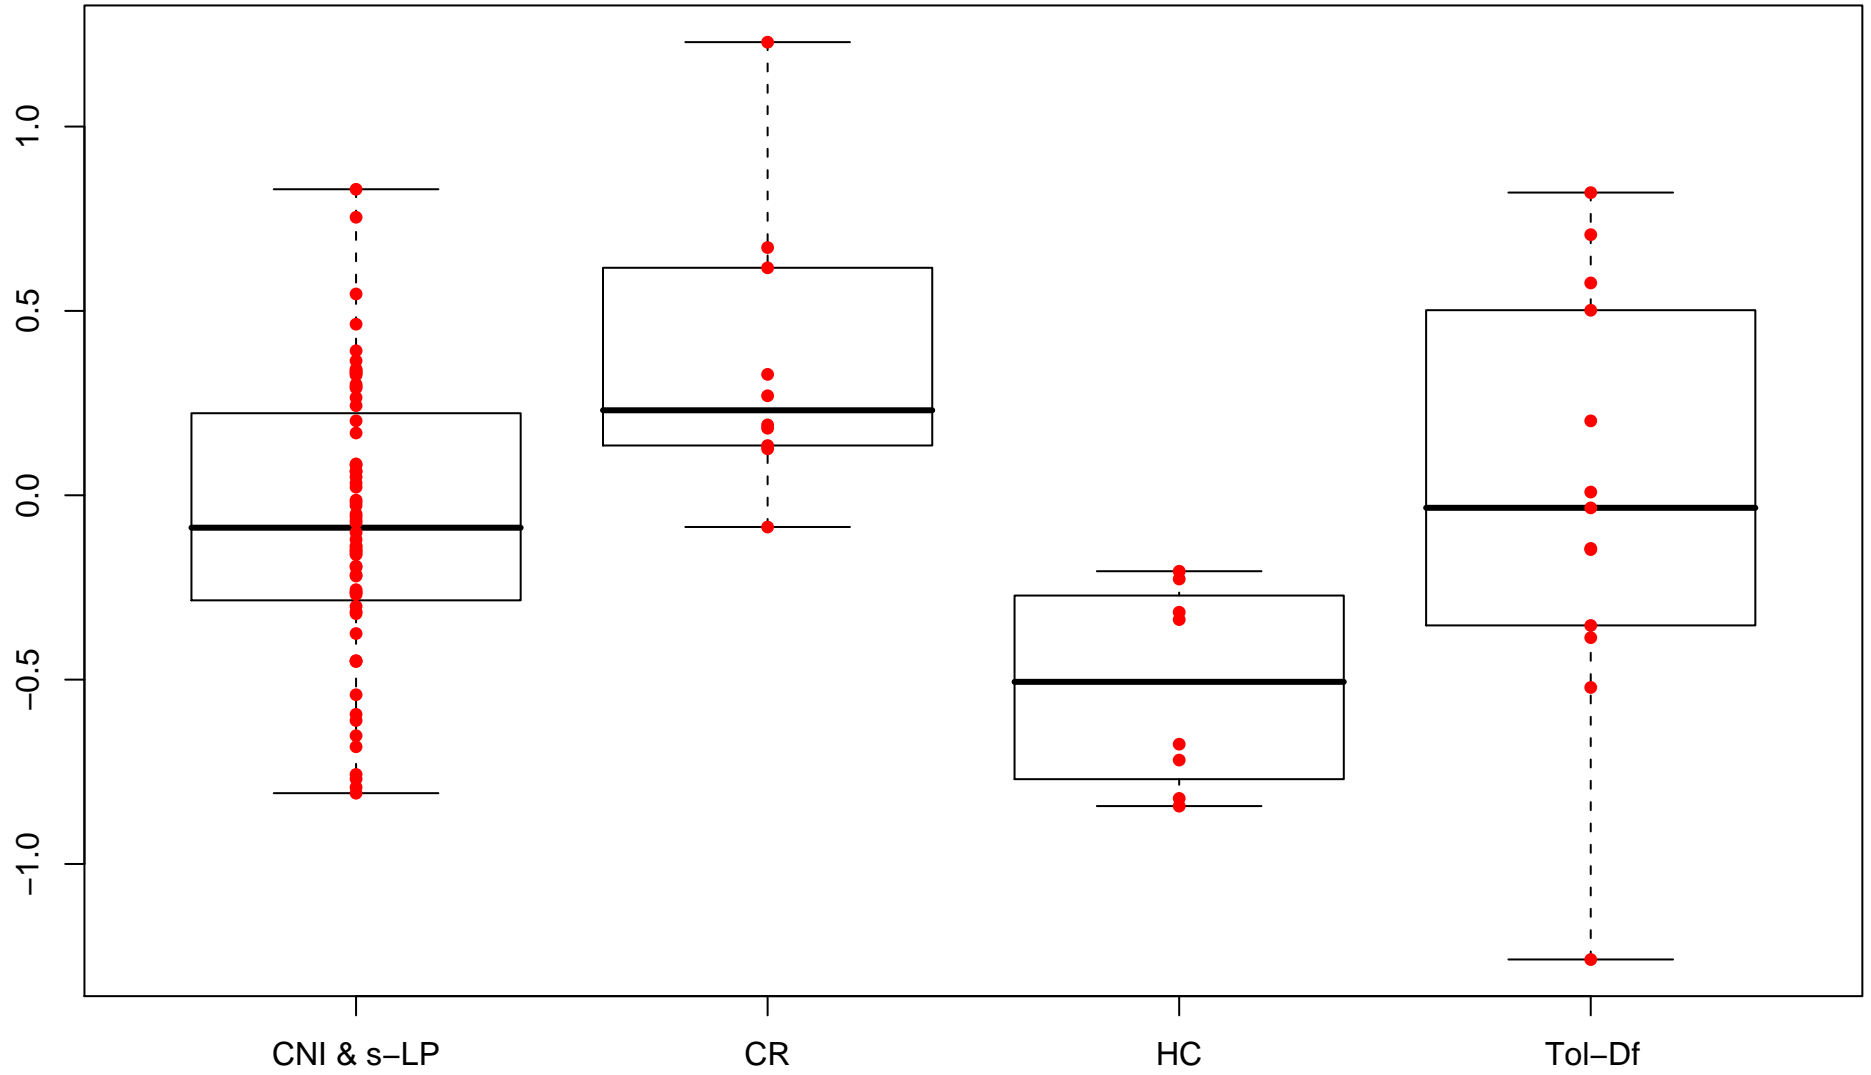

Rank 125 : C8ORF60  
0.0002462

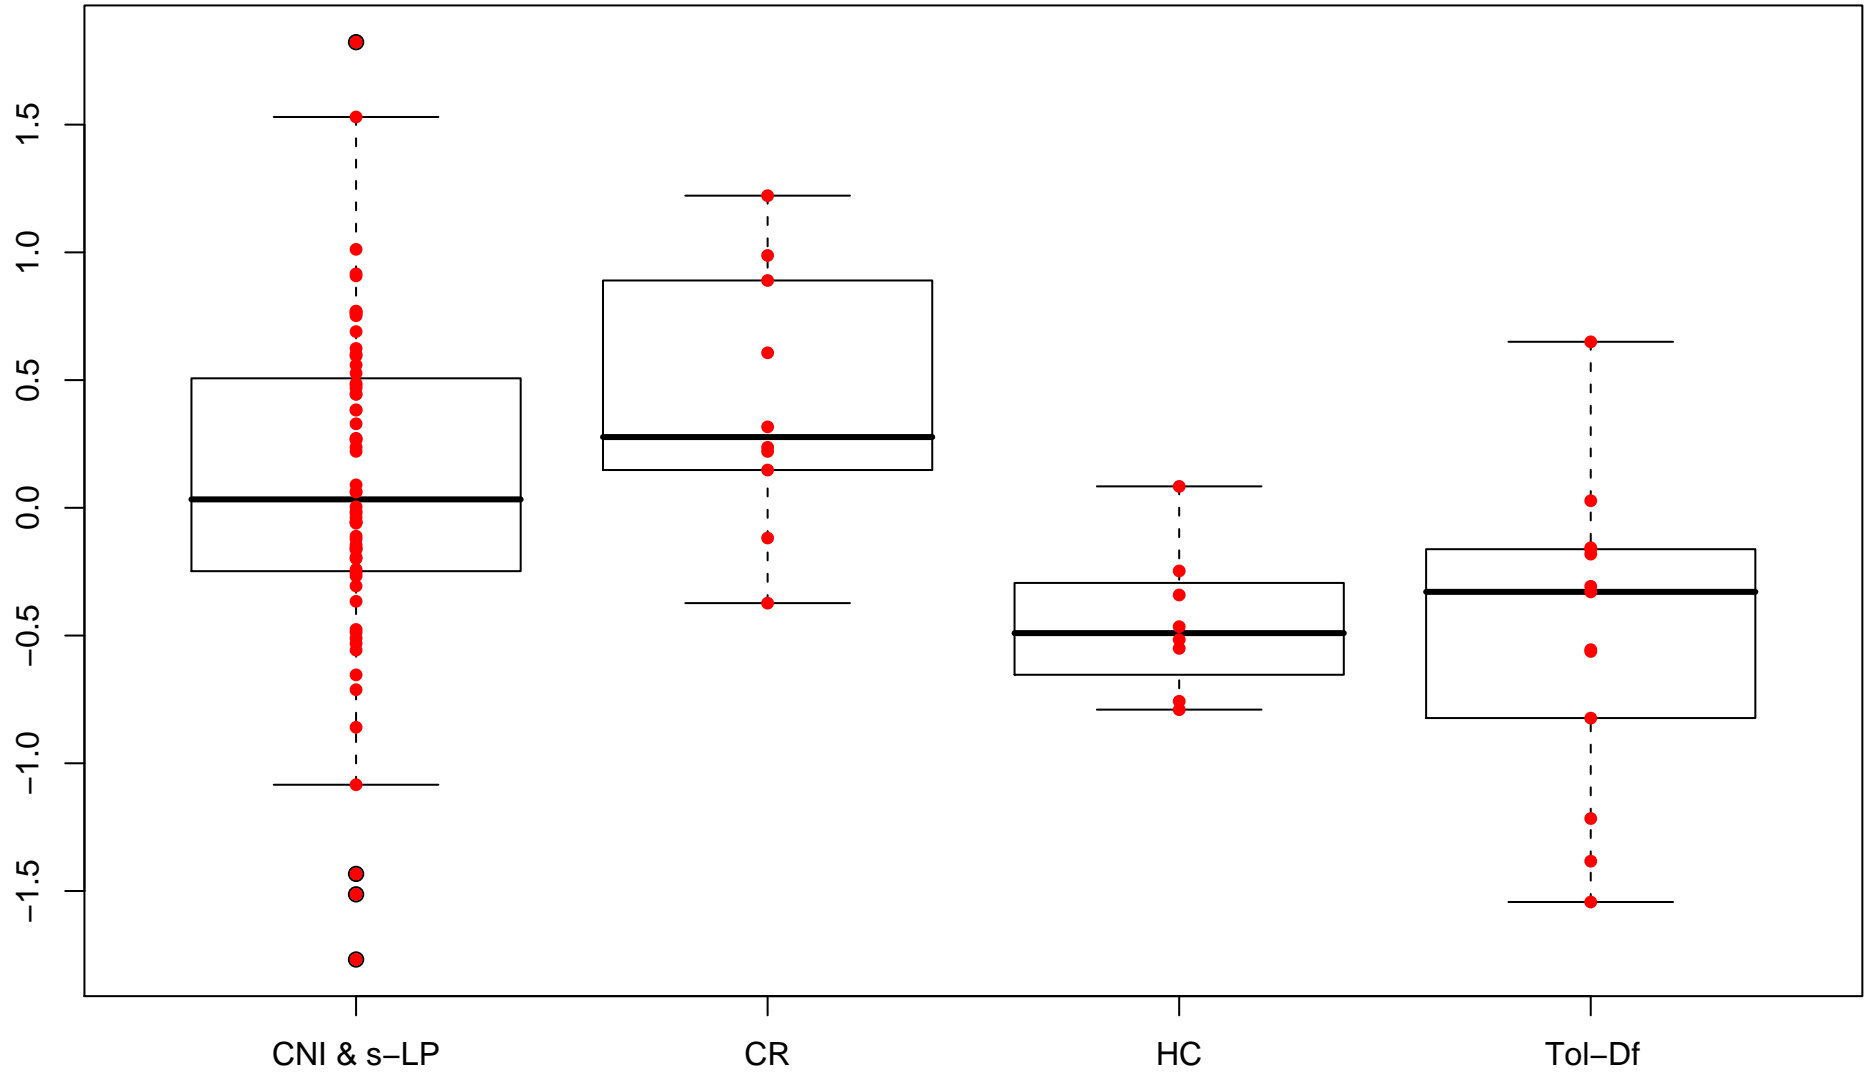

Rank 126 : MXD1  
0.00024878

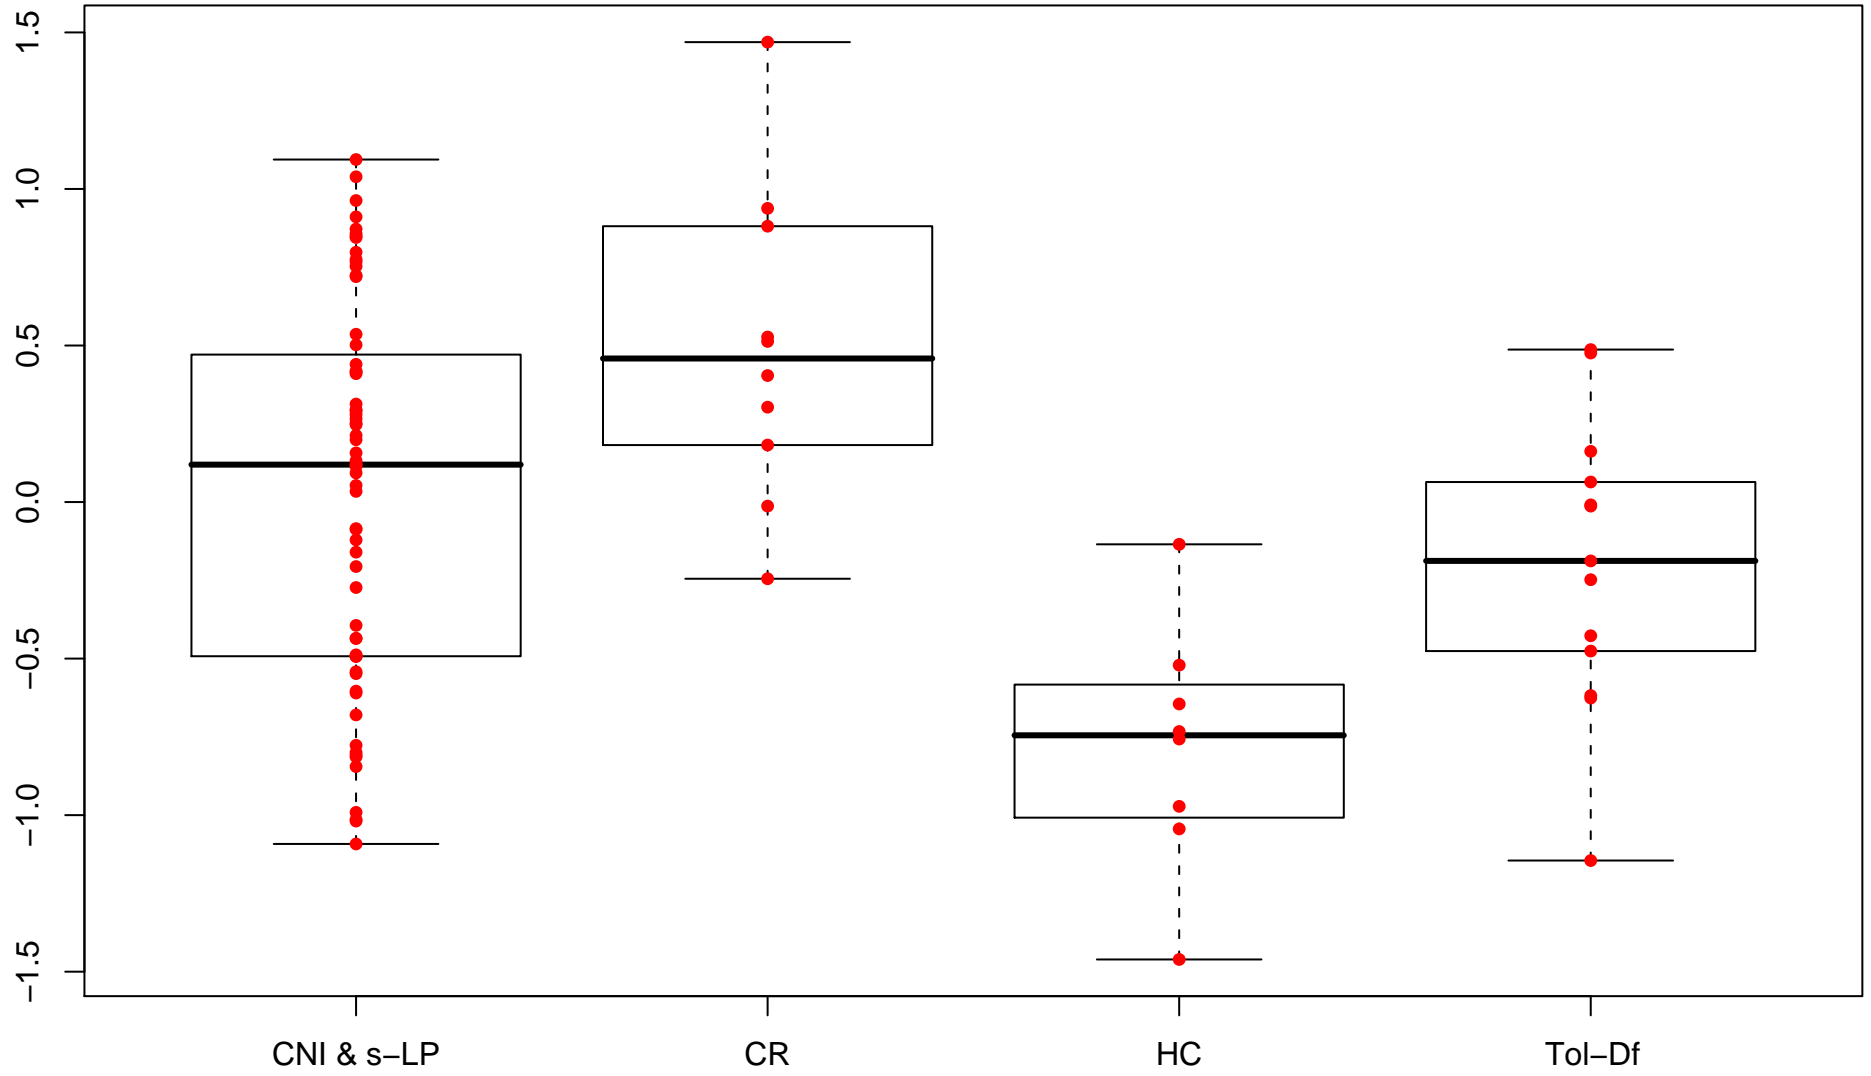

Rank 127 : MATK  
0.00025111

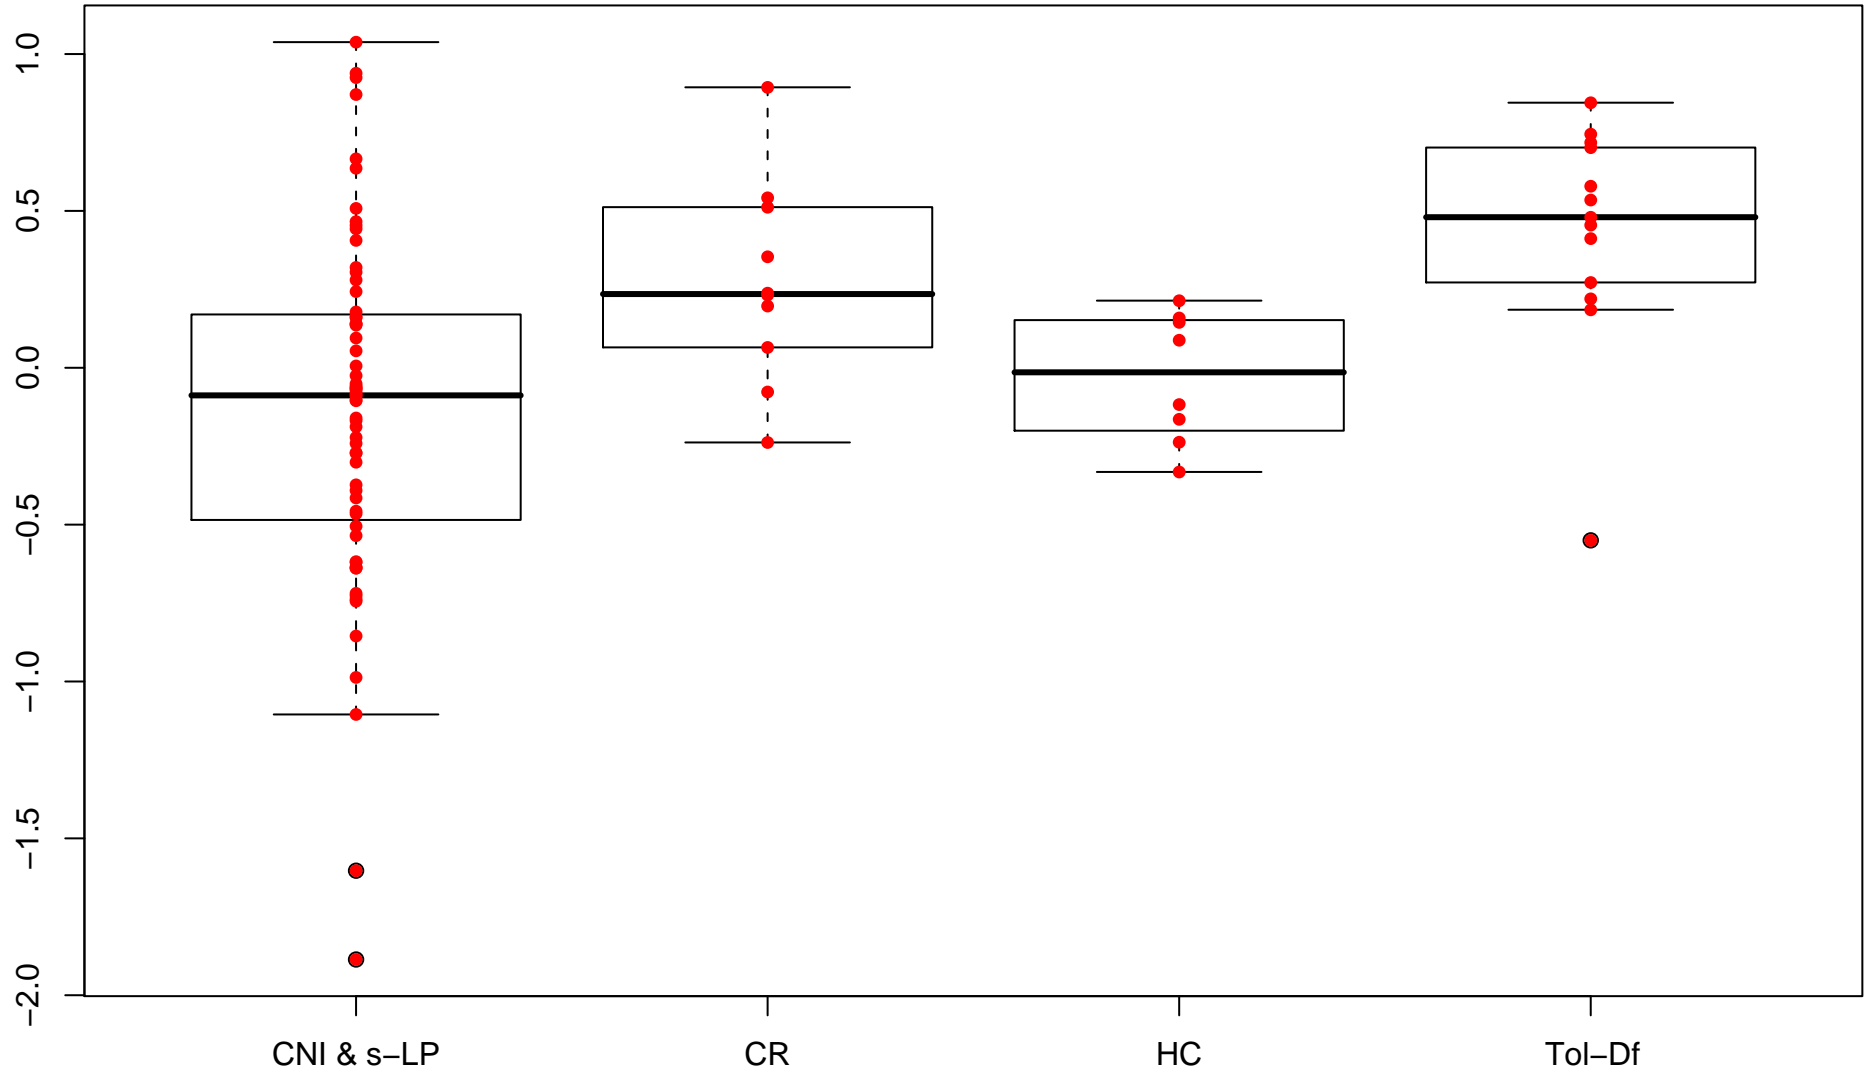

Rank 128 : LYN  
0.00025524

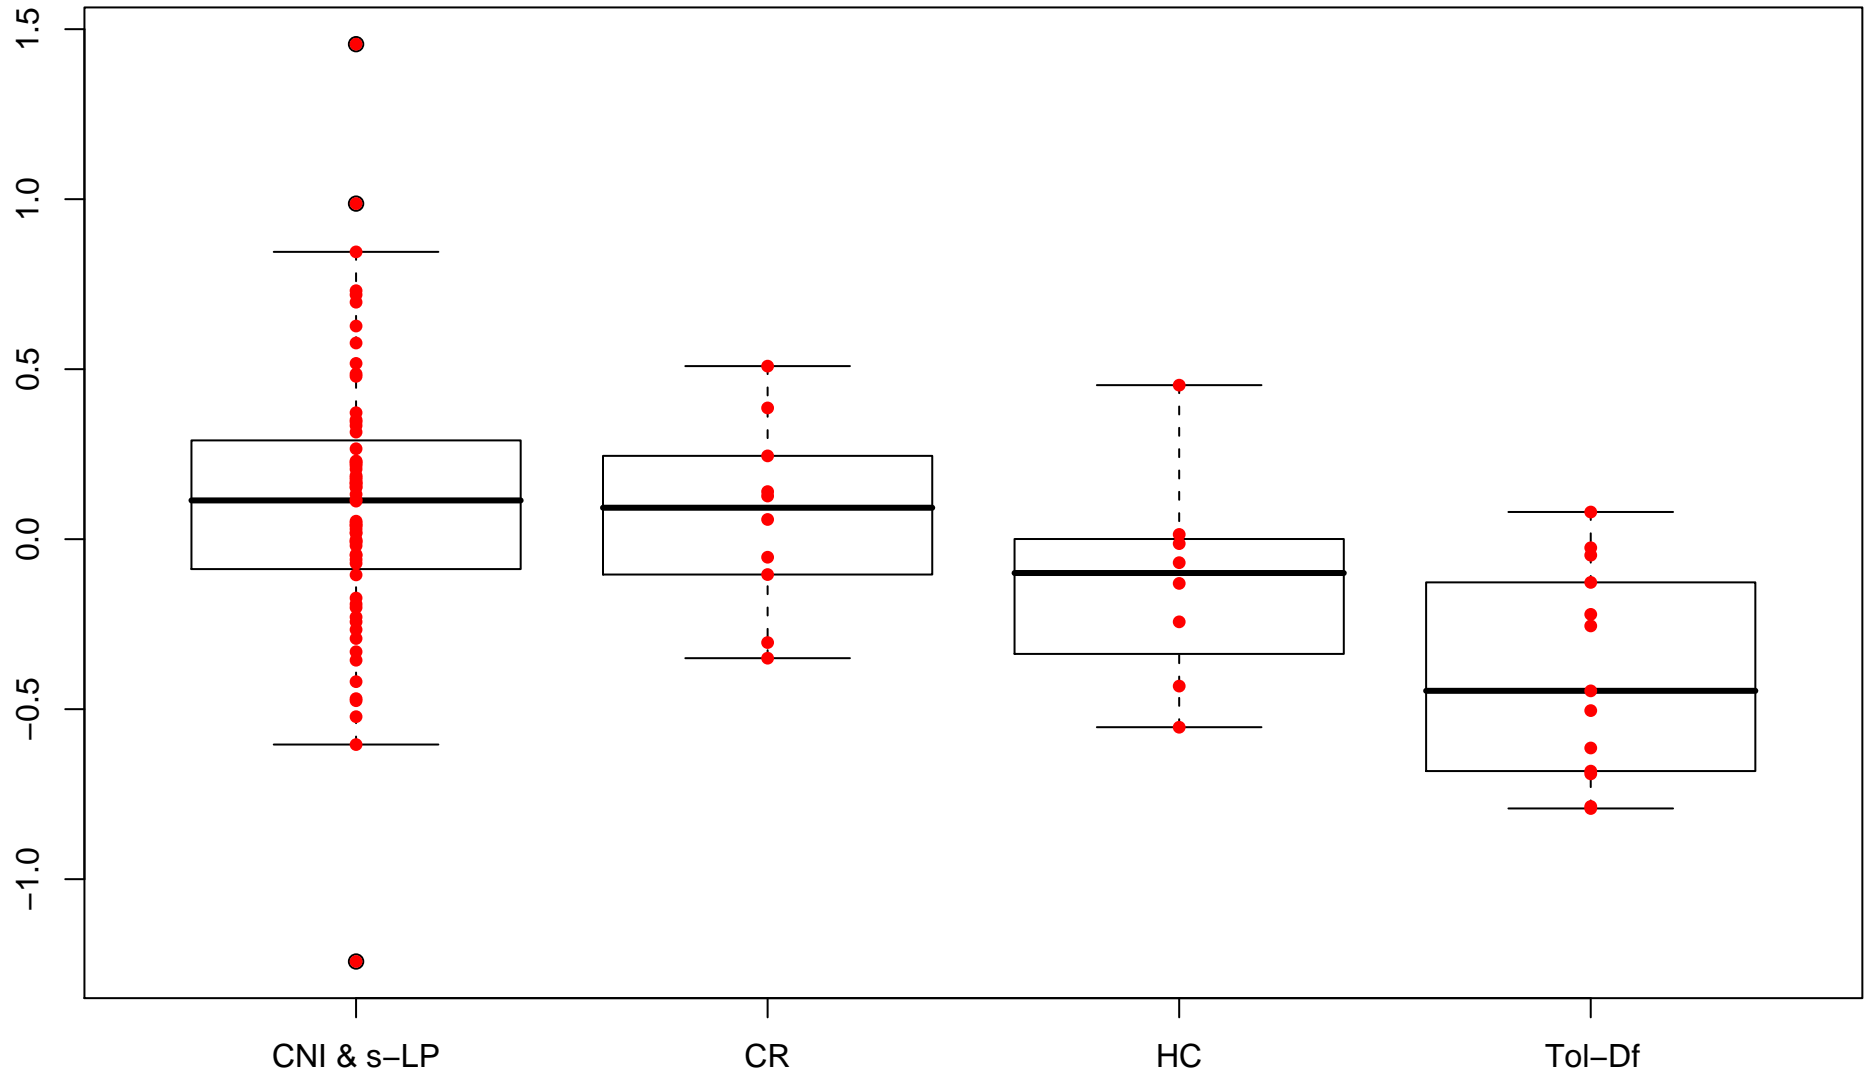

Rank 129 : LGALS2  
0.00025635

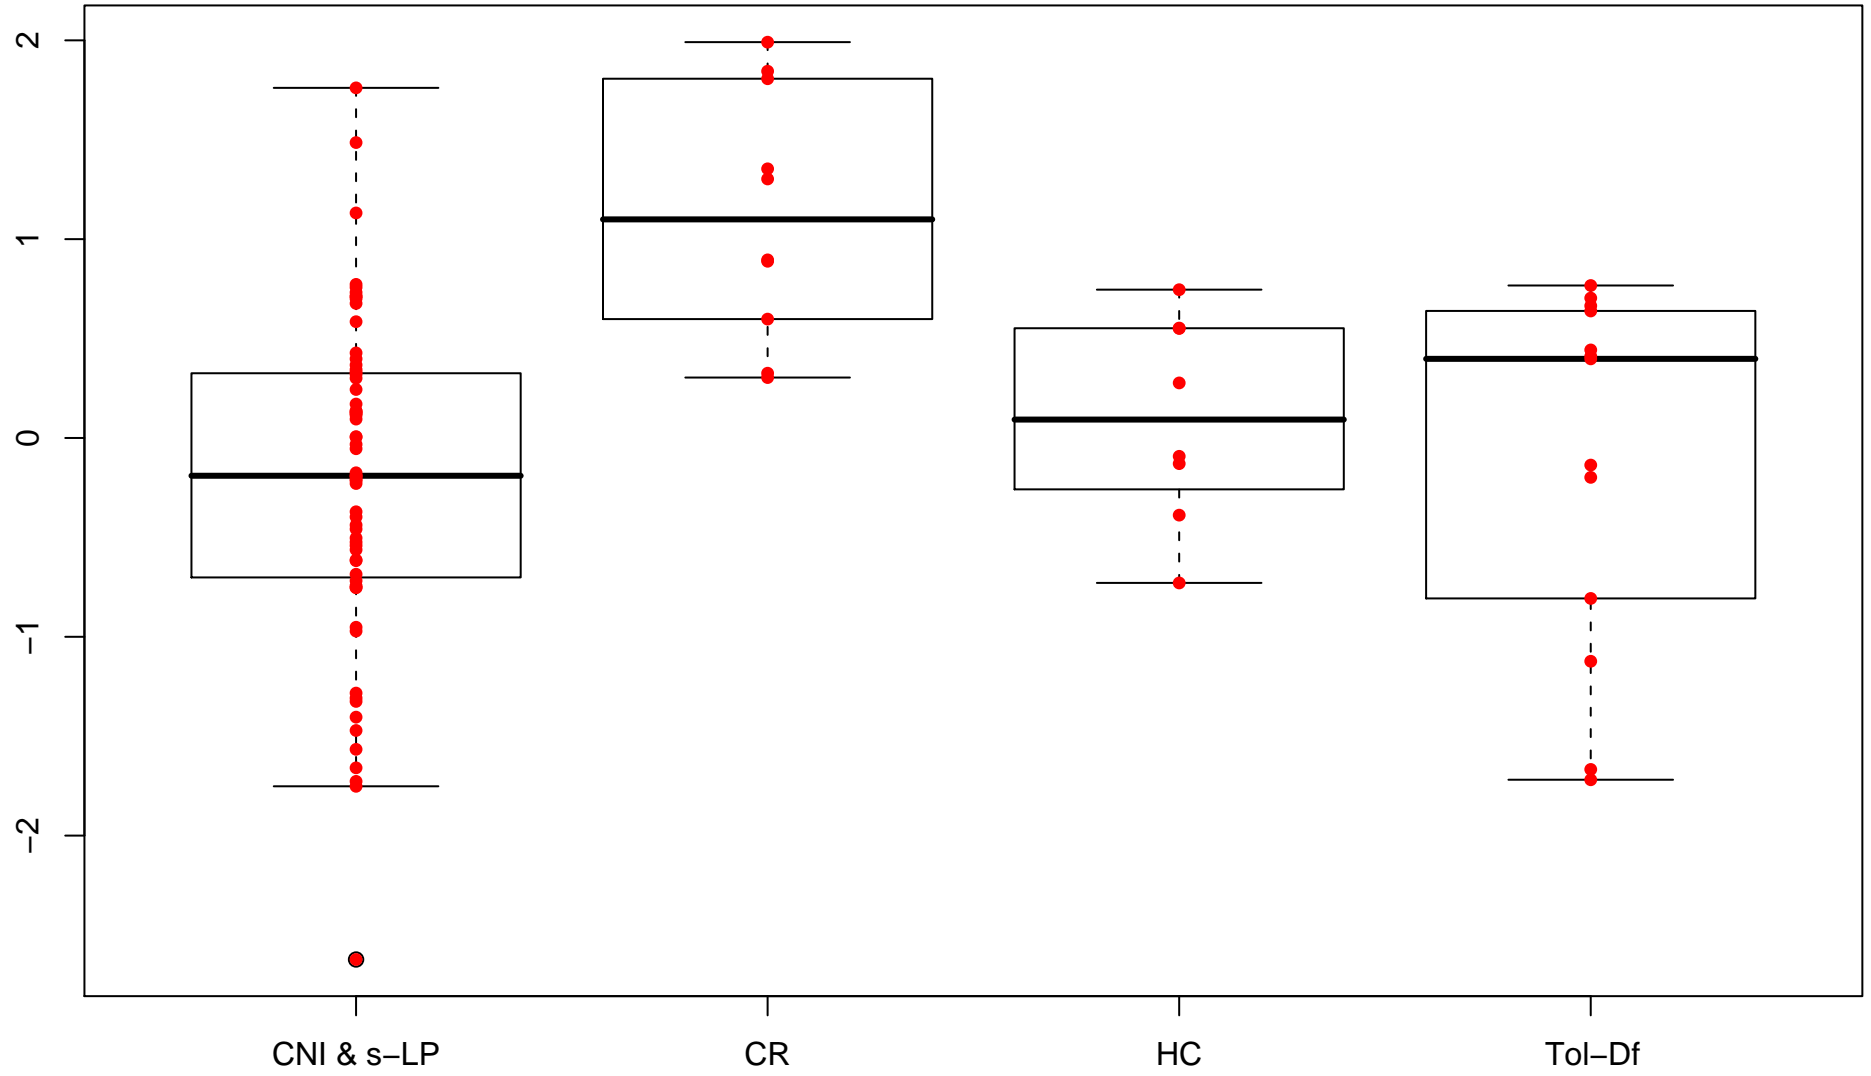

Rank 130 : SEPT9  
0.00025951

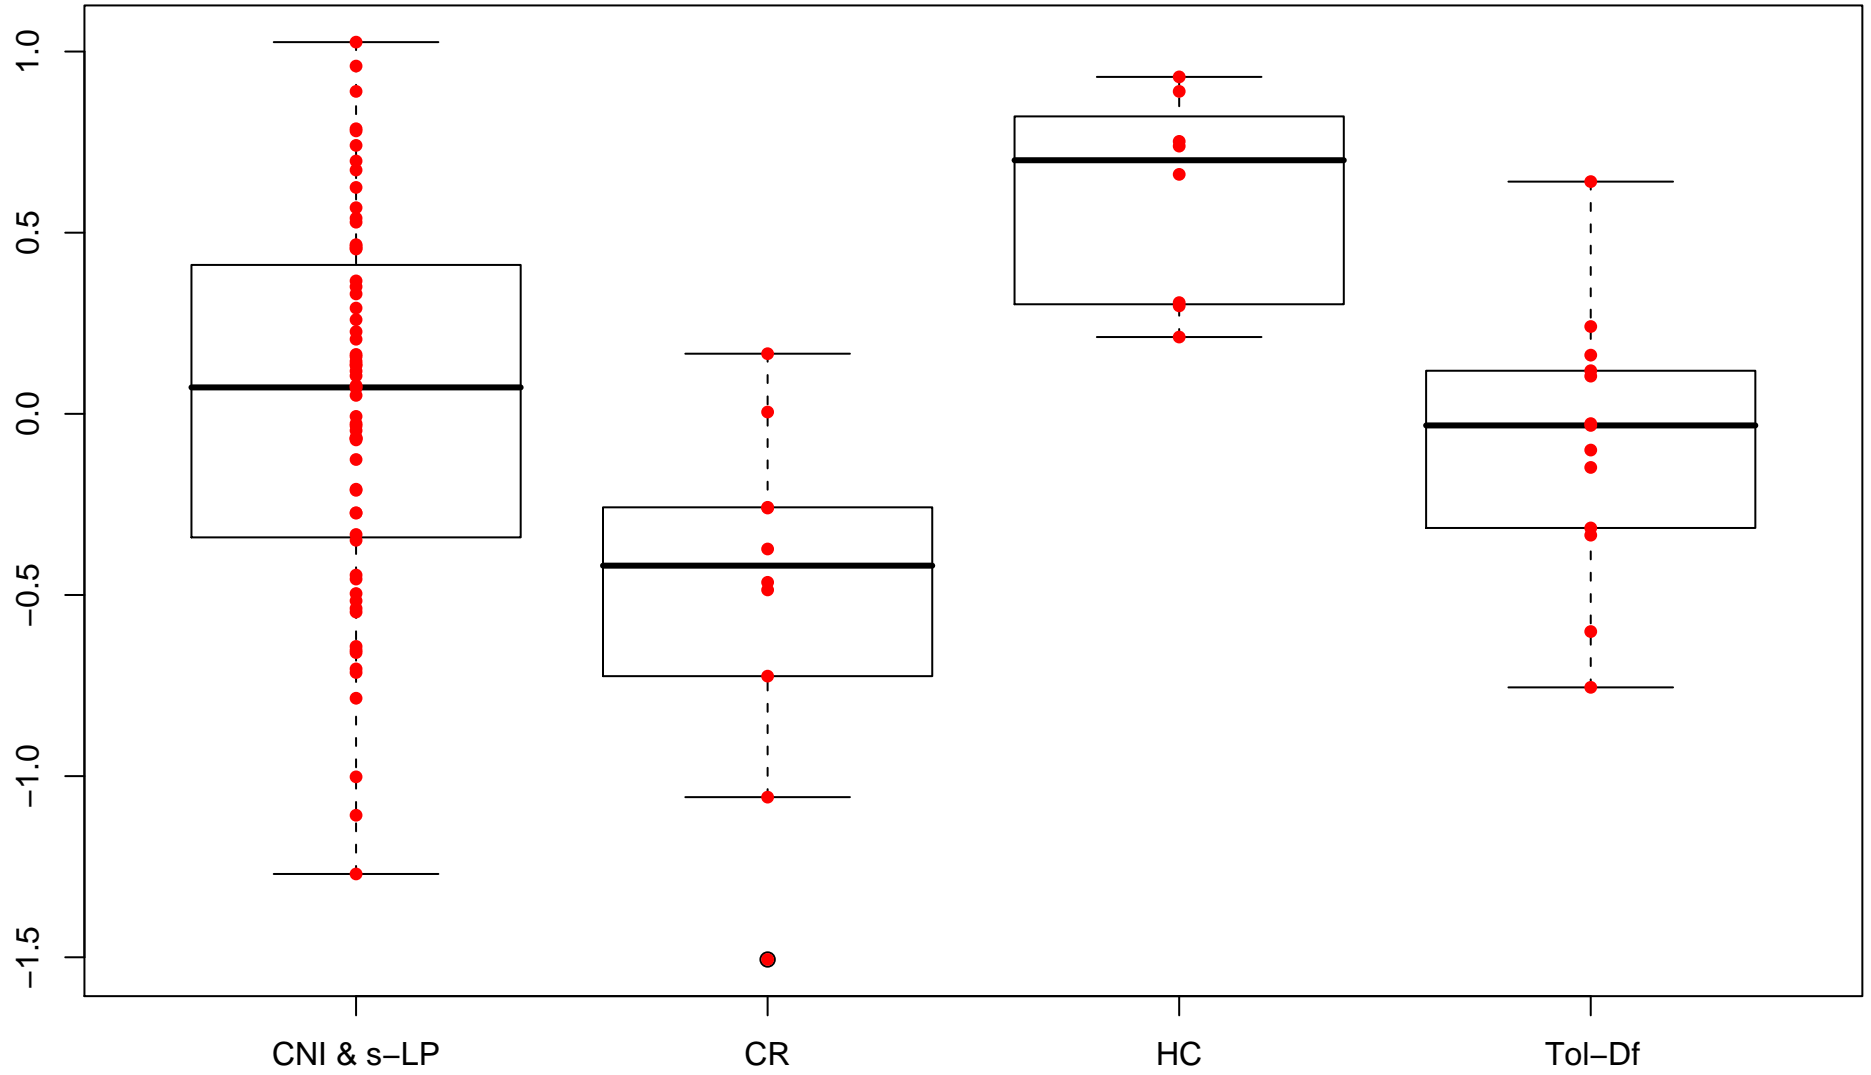



Rank 131 : PDCD6  
0.00027342

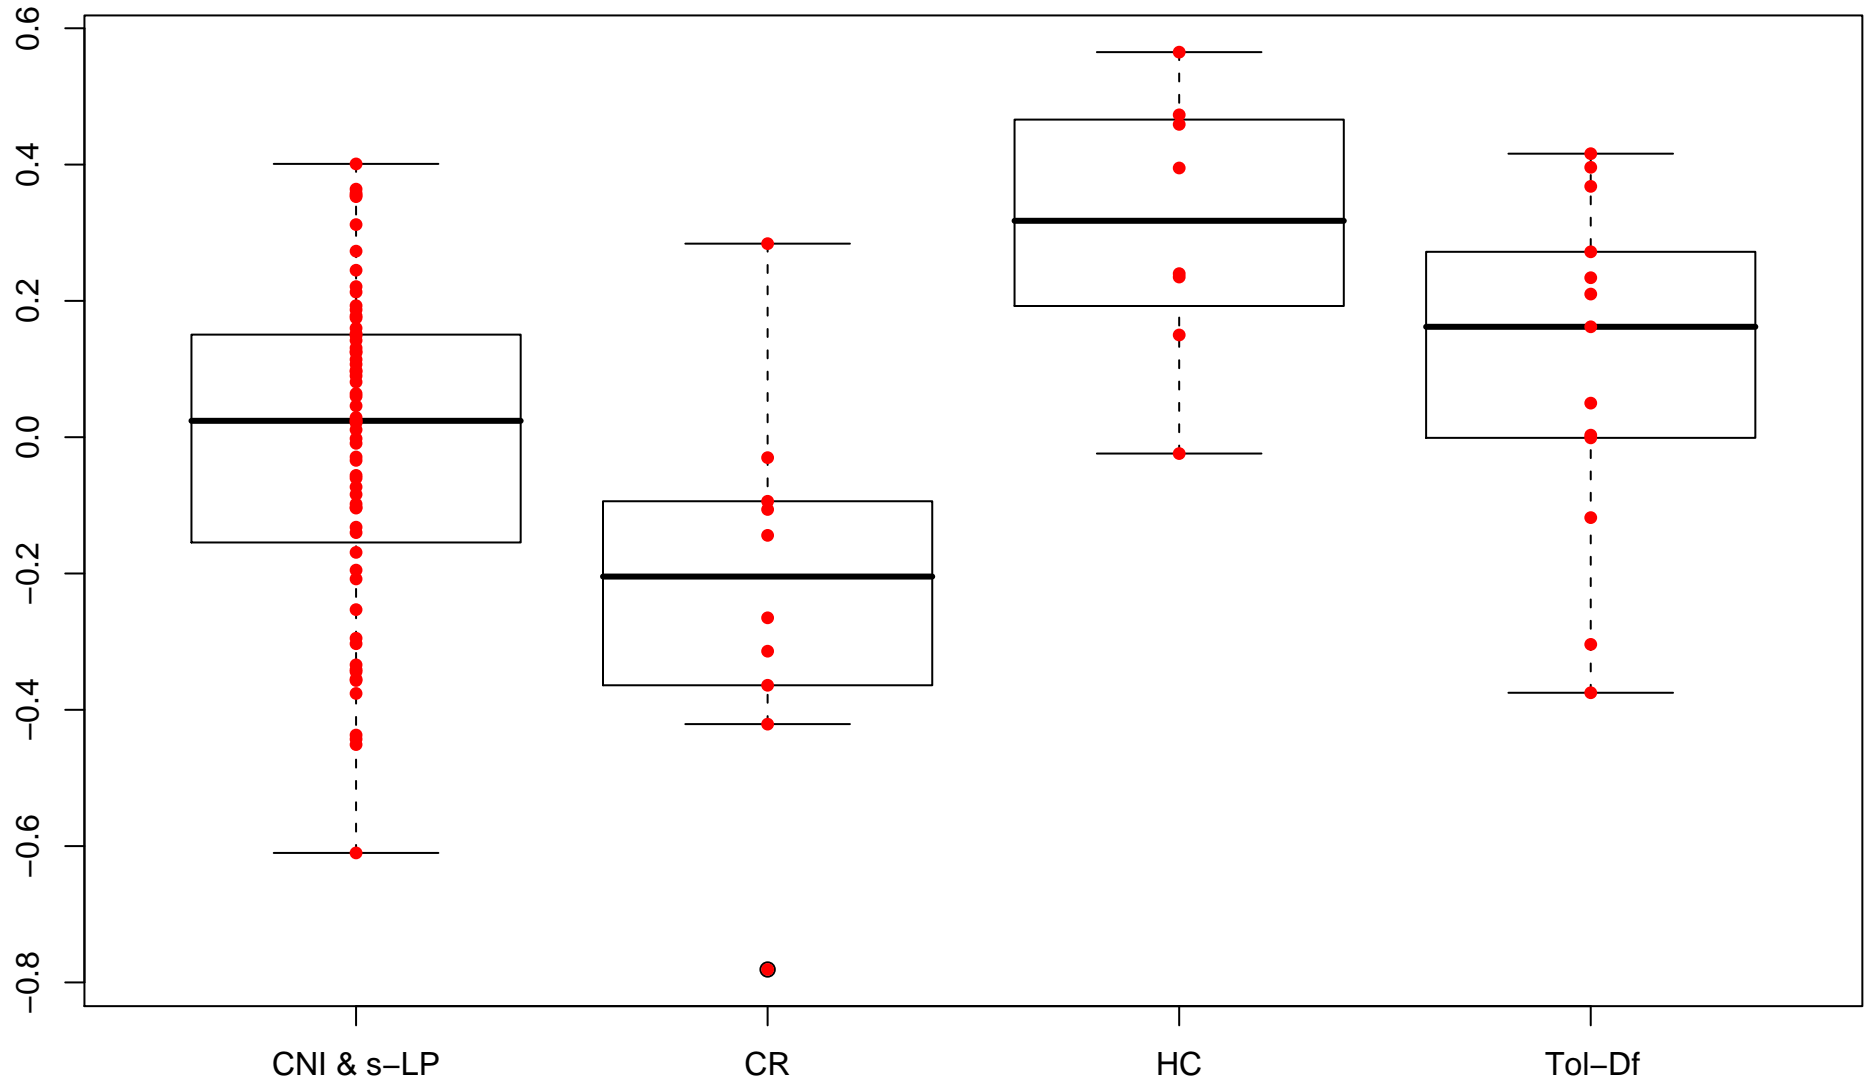

Rank 132 : DCLRE1A  
0.00027807

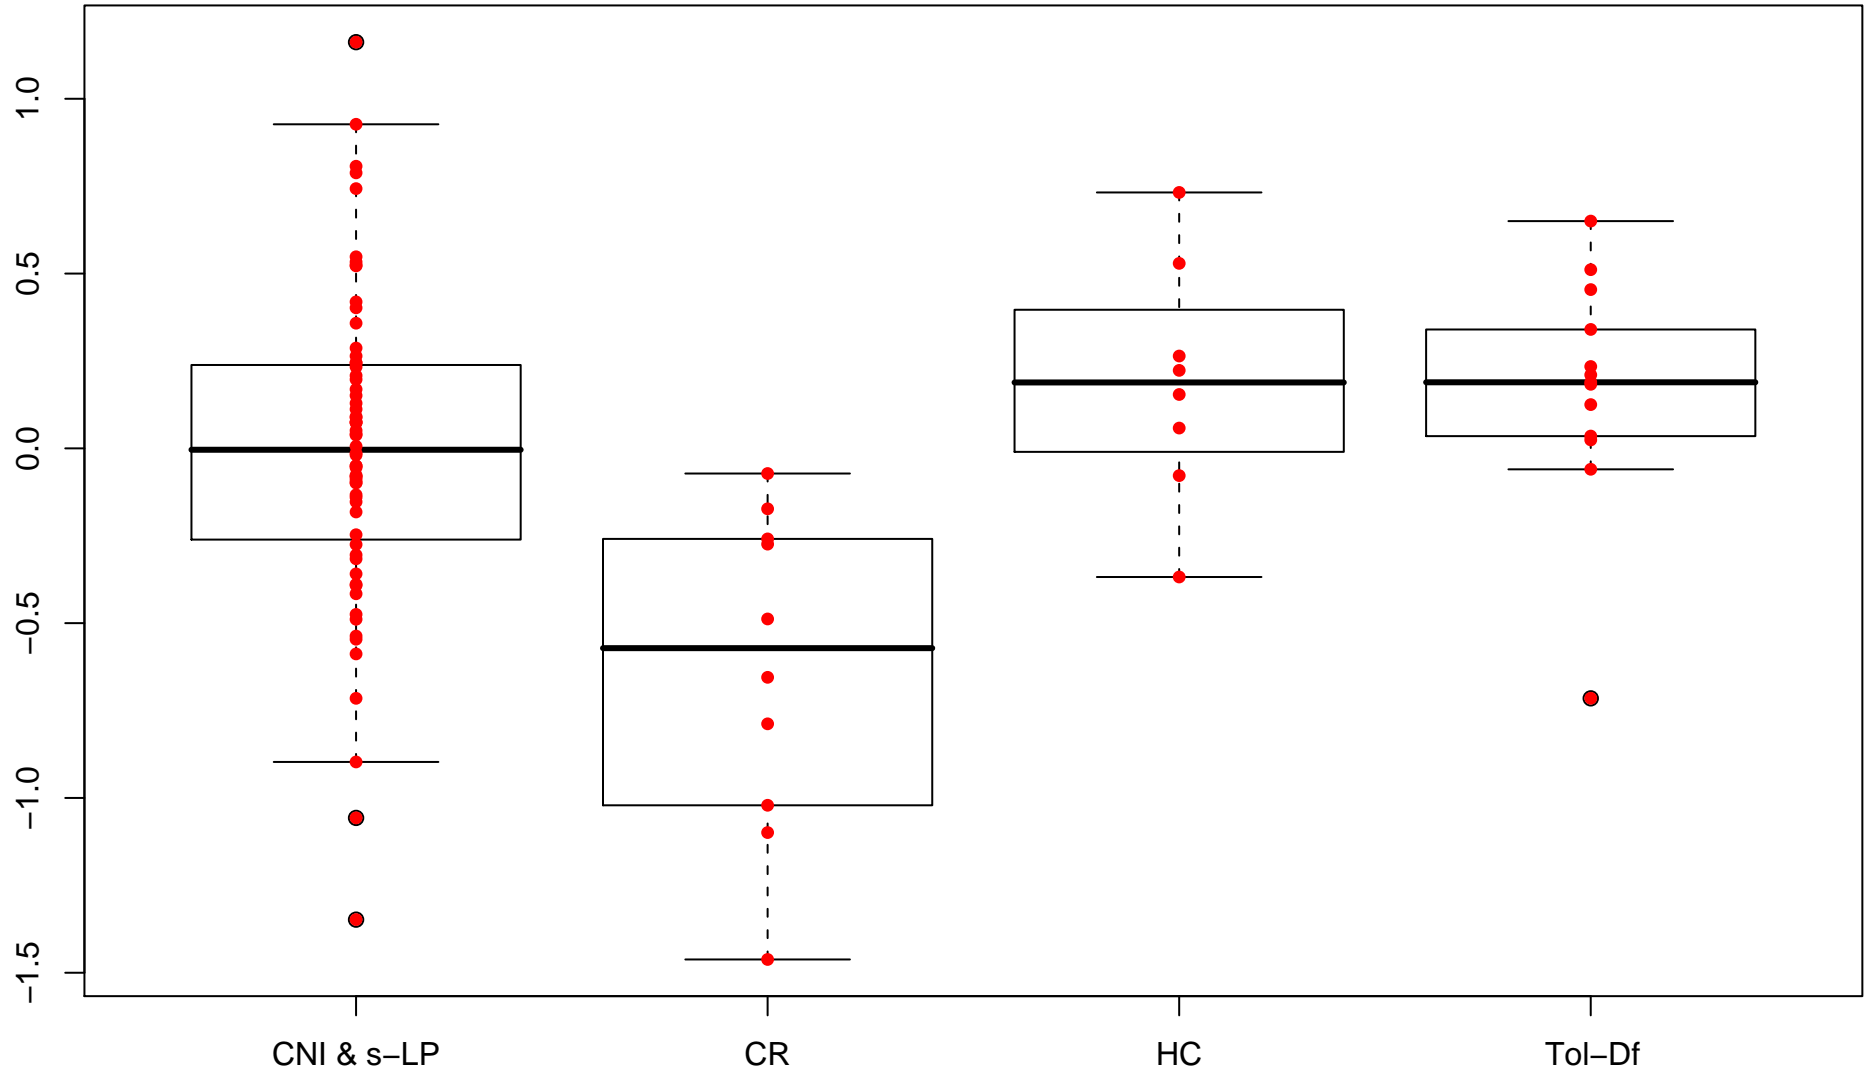

Rank 133 : IL10RA  
0.00028781

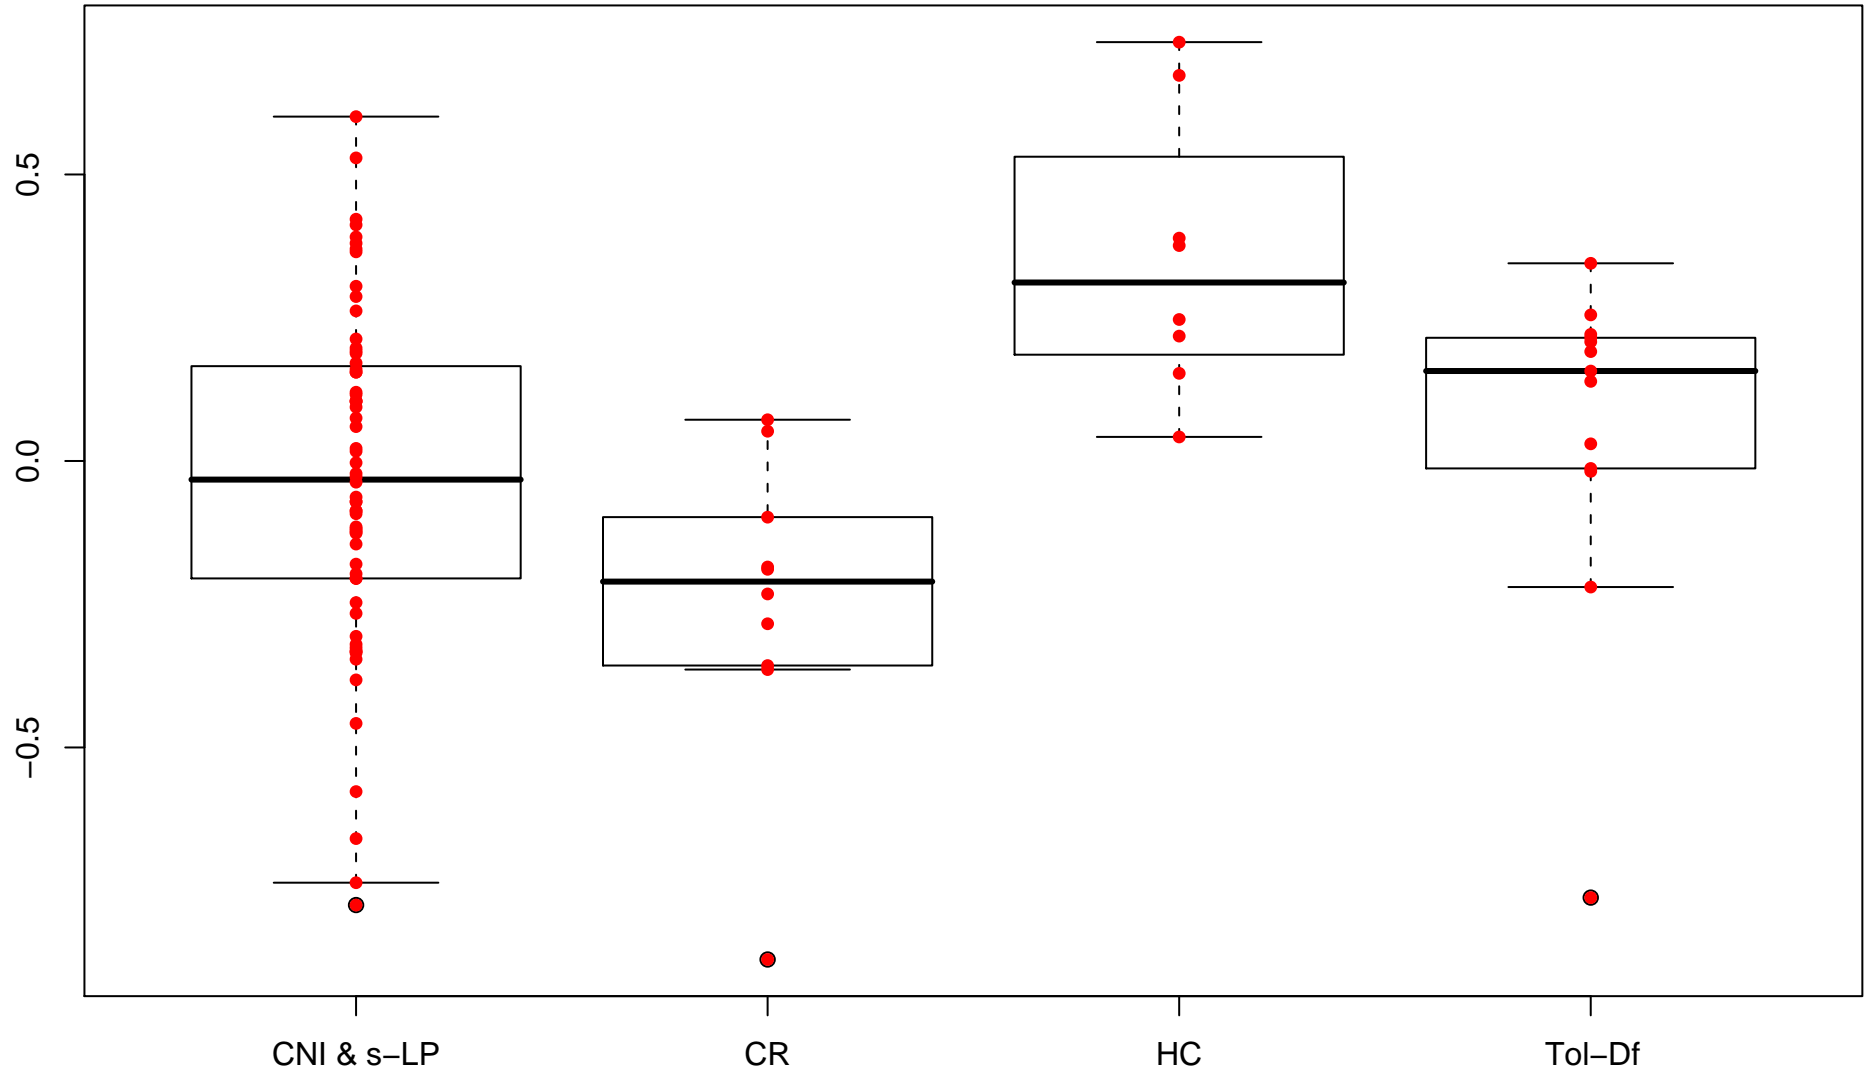

Rank 134 : MAGEH1  
0.00030851

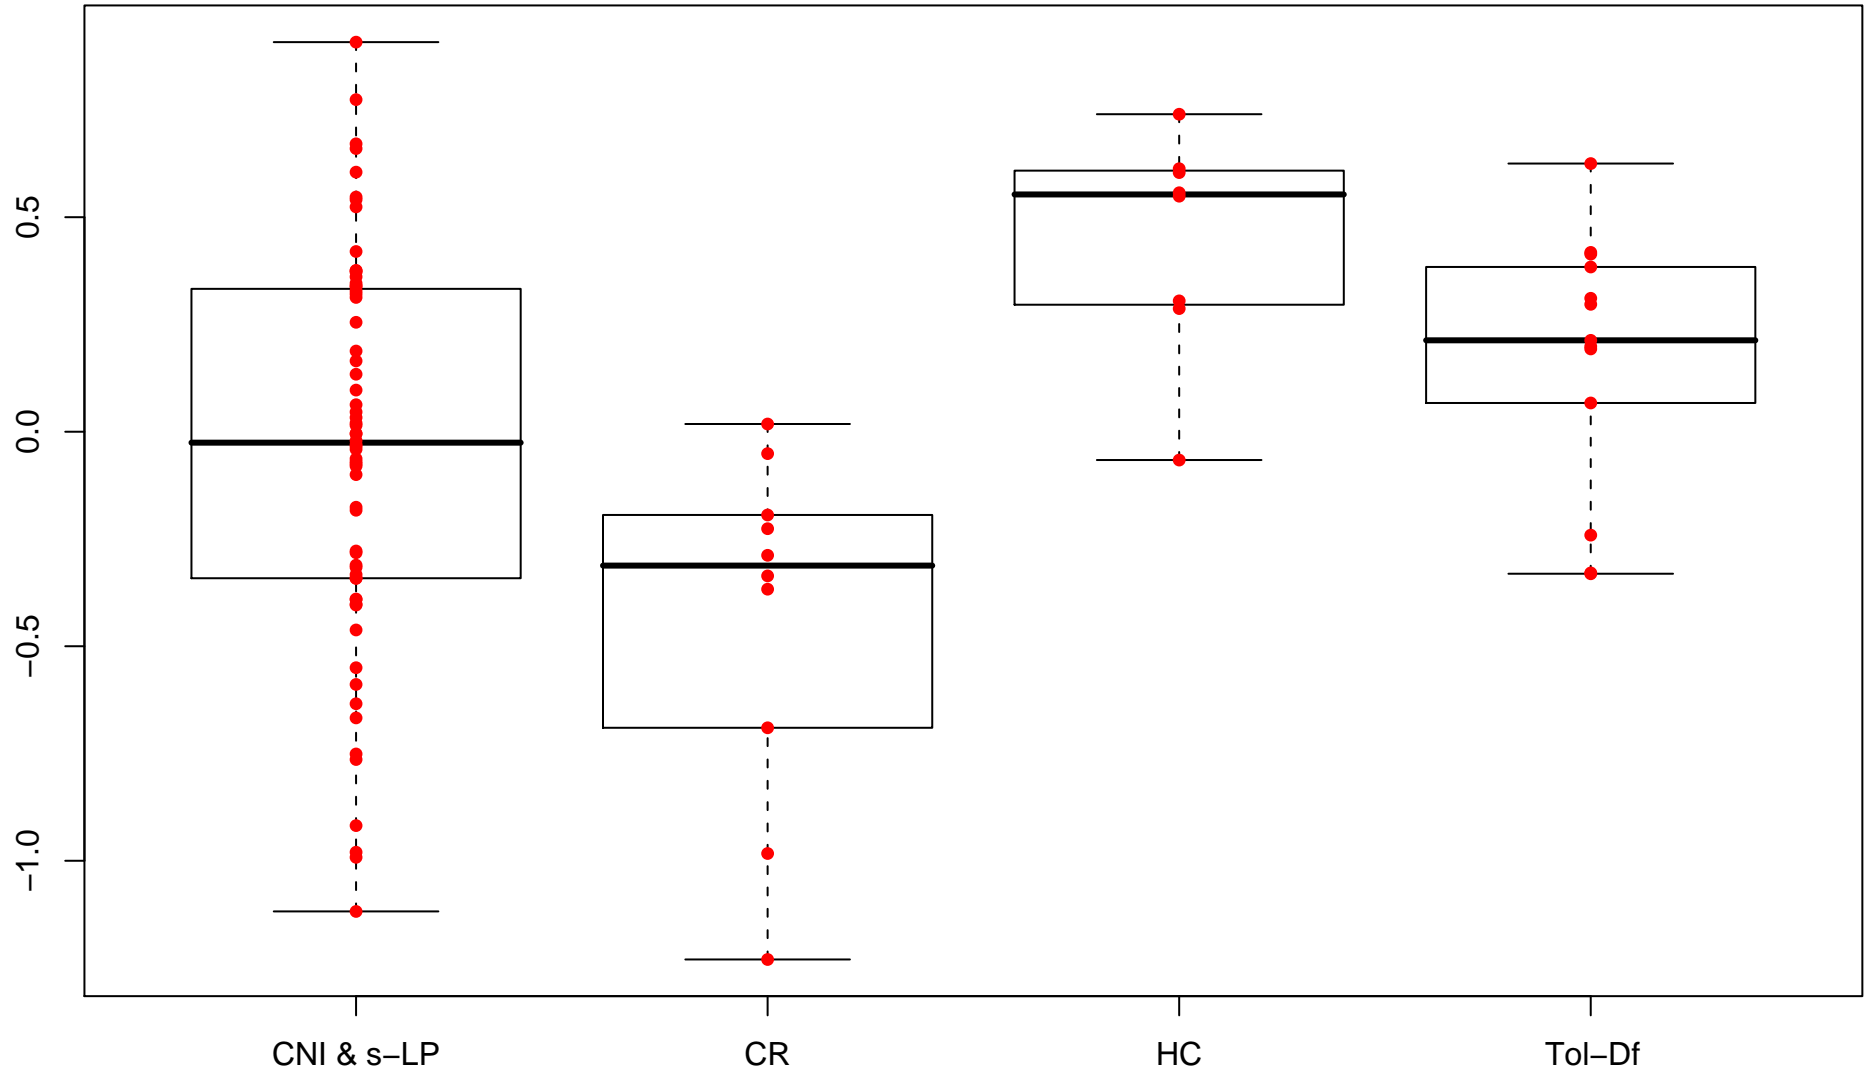

Rank 135 : LOC550643  
0.0003202

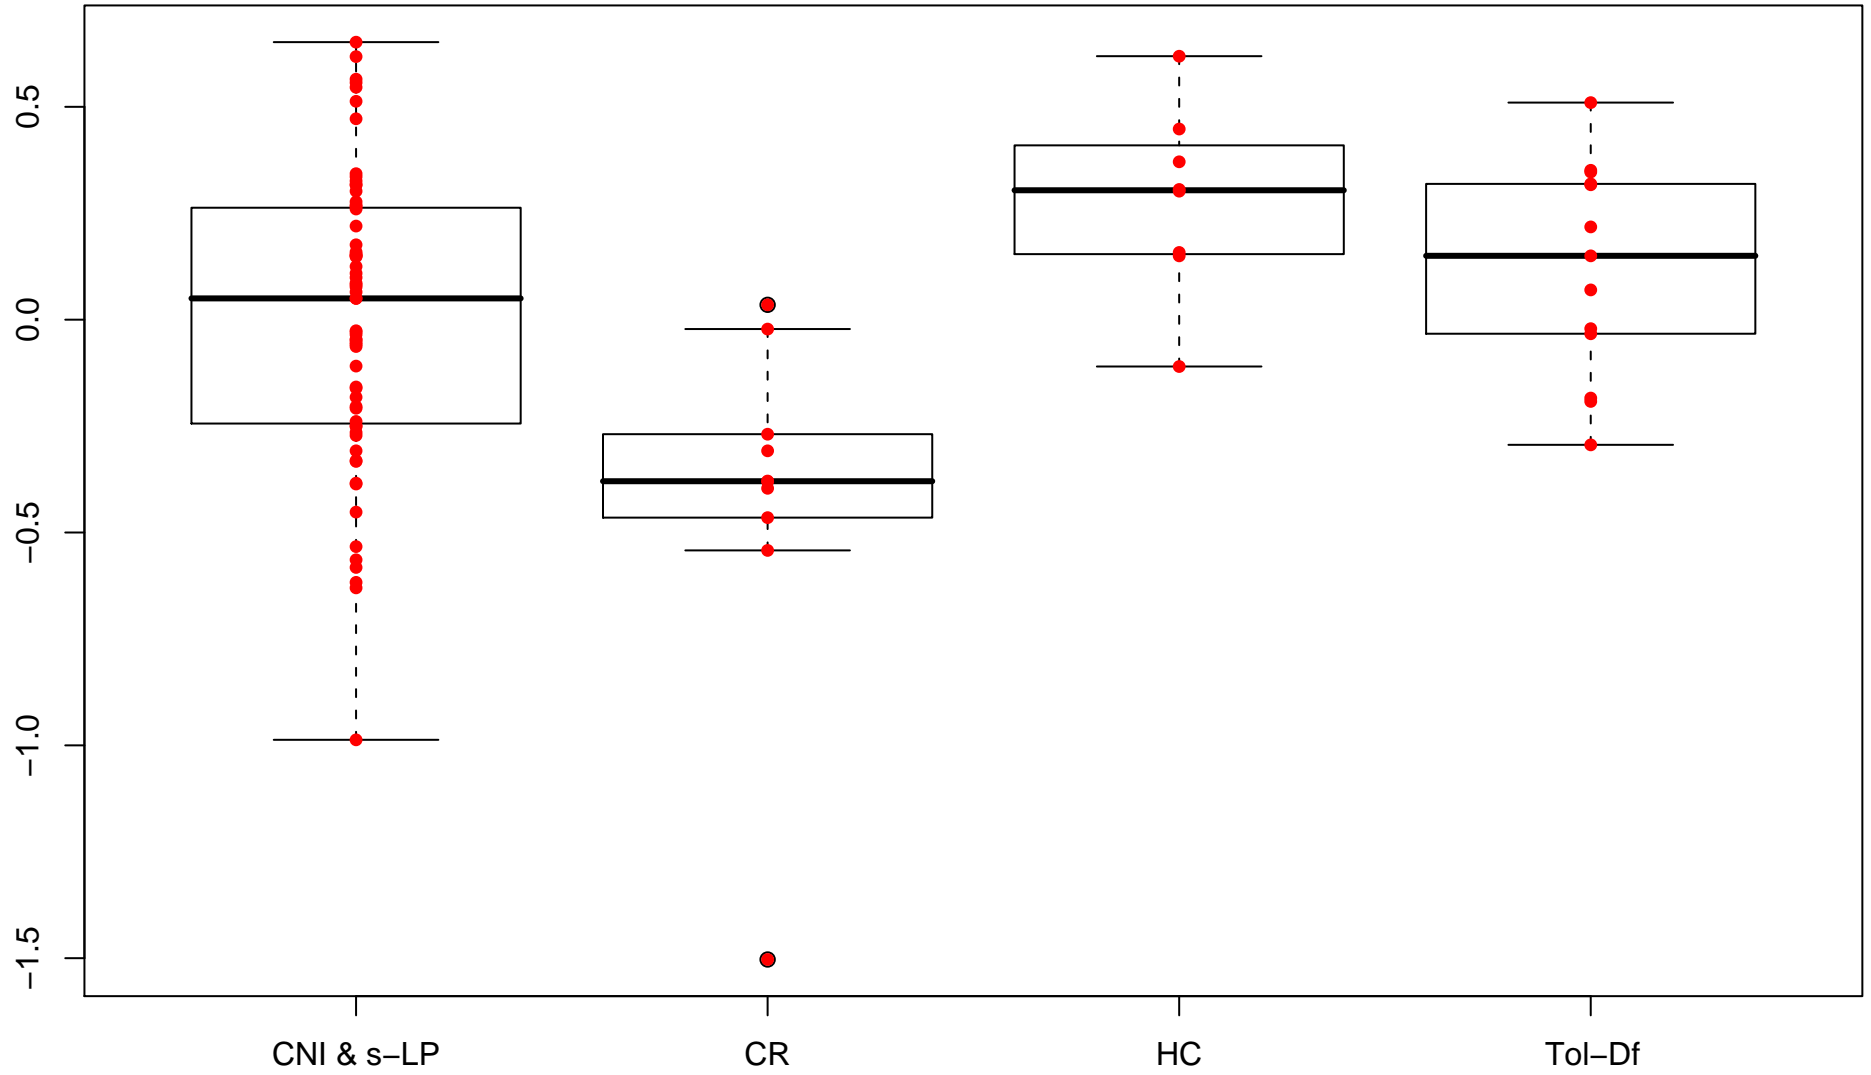

Rank 136 : SLC25A37  
0.0003212

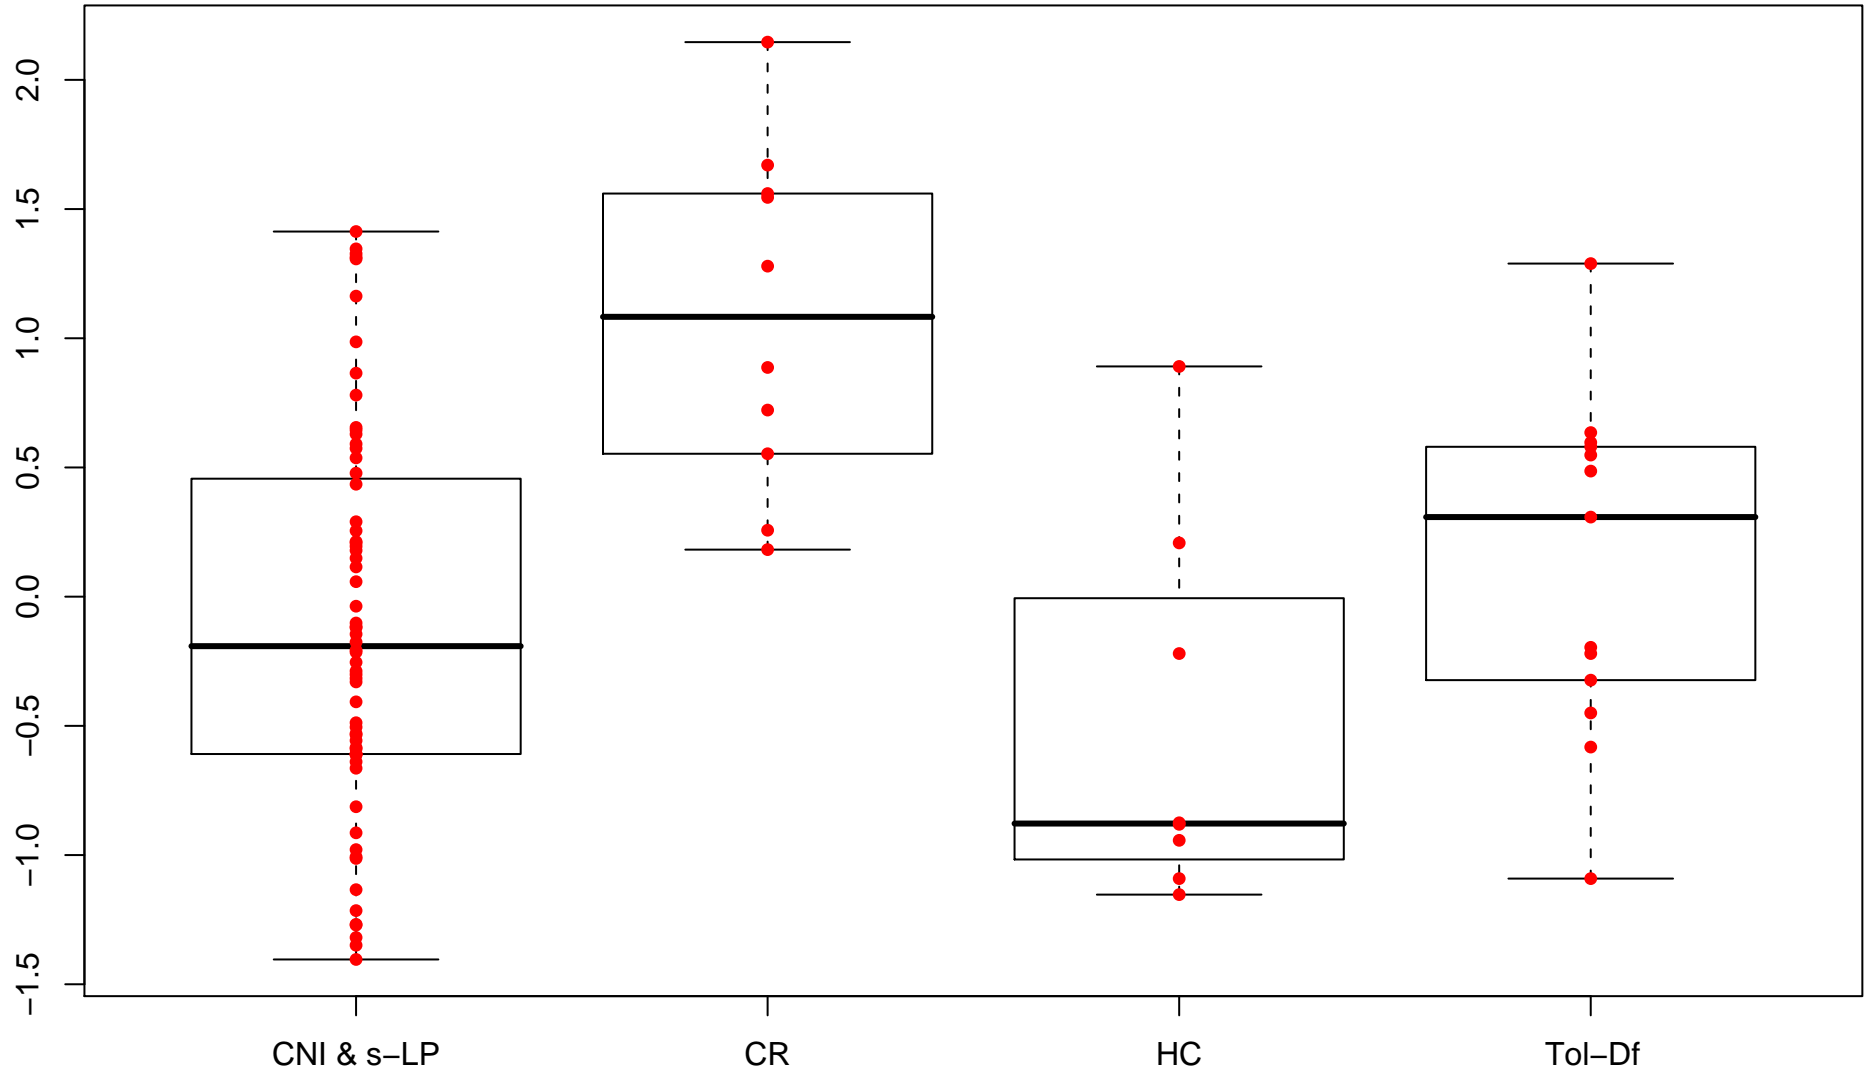

Rank 137 : CARD6  
0.0003232

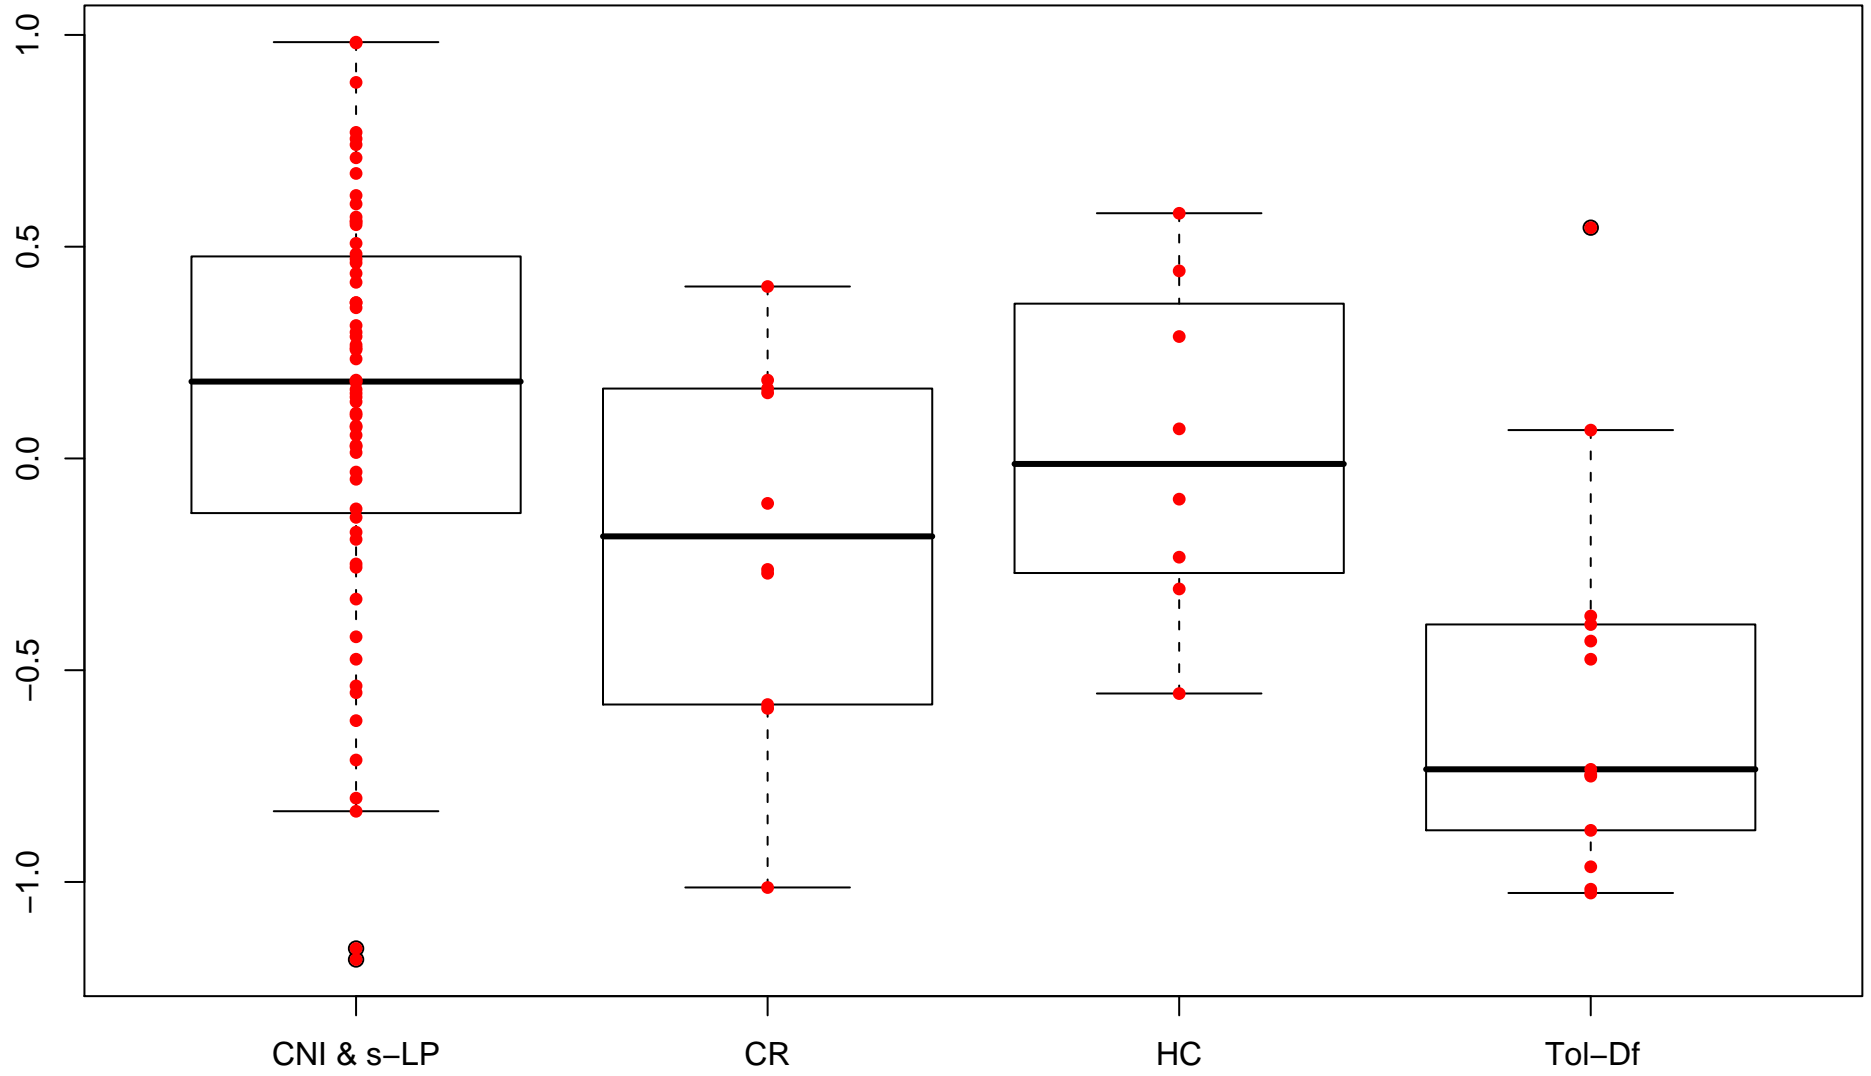

Rank 138 : ZFP2  
0.000324

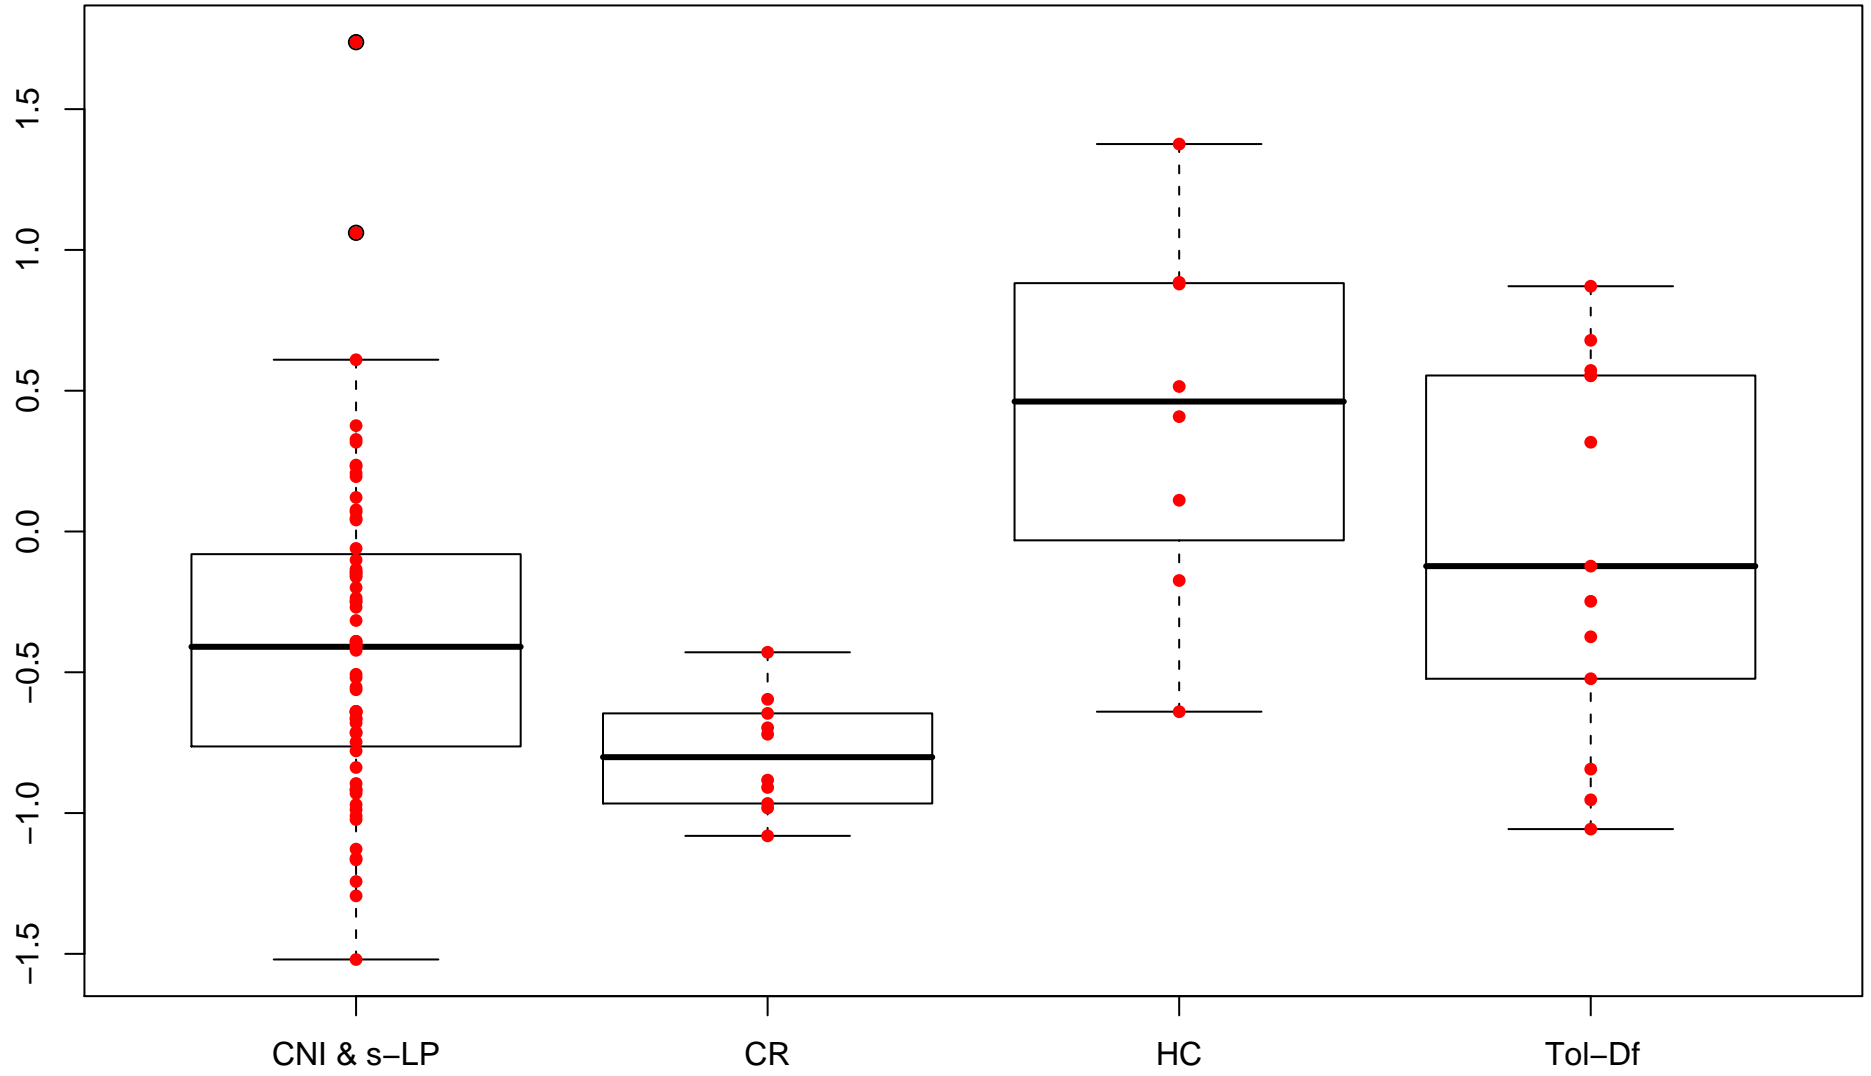



Rank 139 : PTMA  
0.0003259

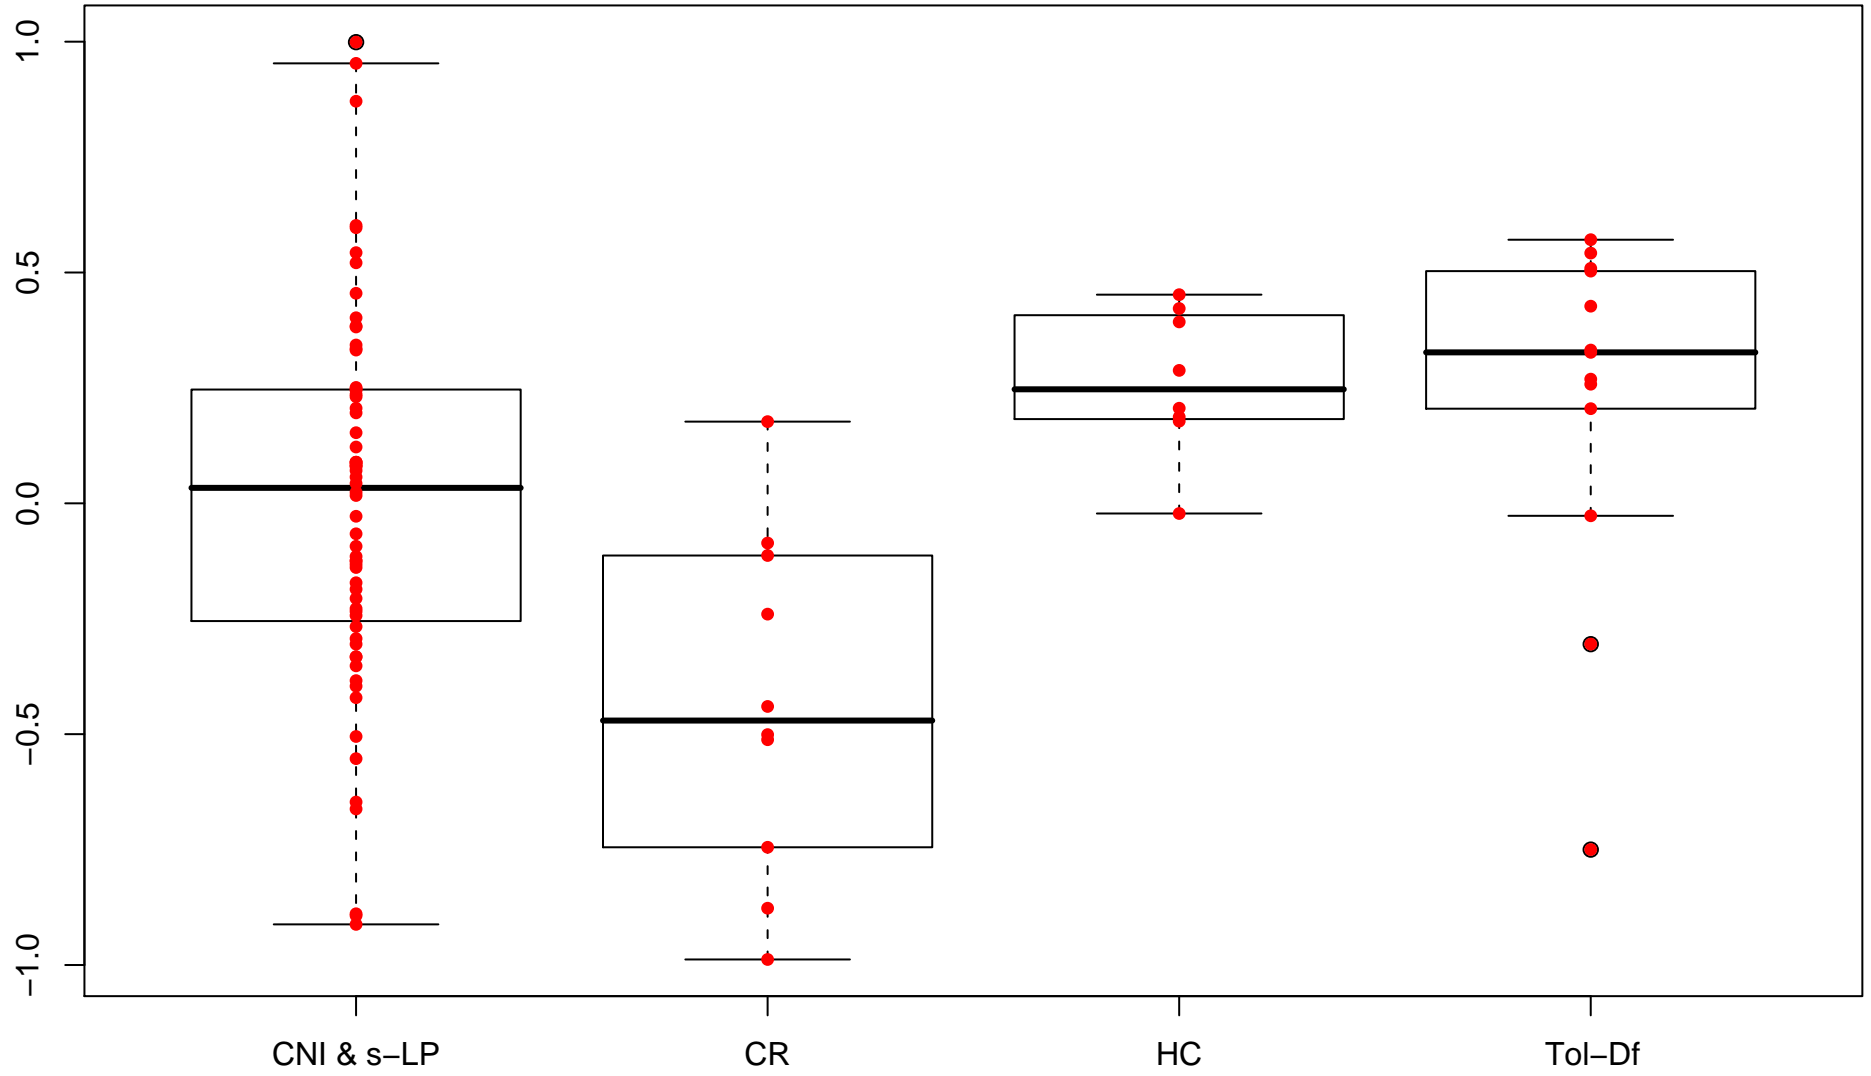

Rank 140 : BACE2  
0.0003302

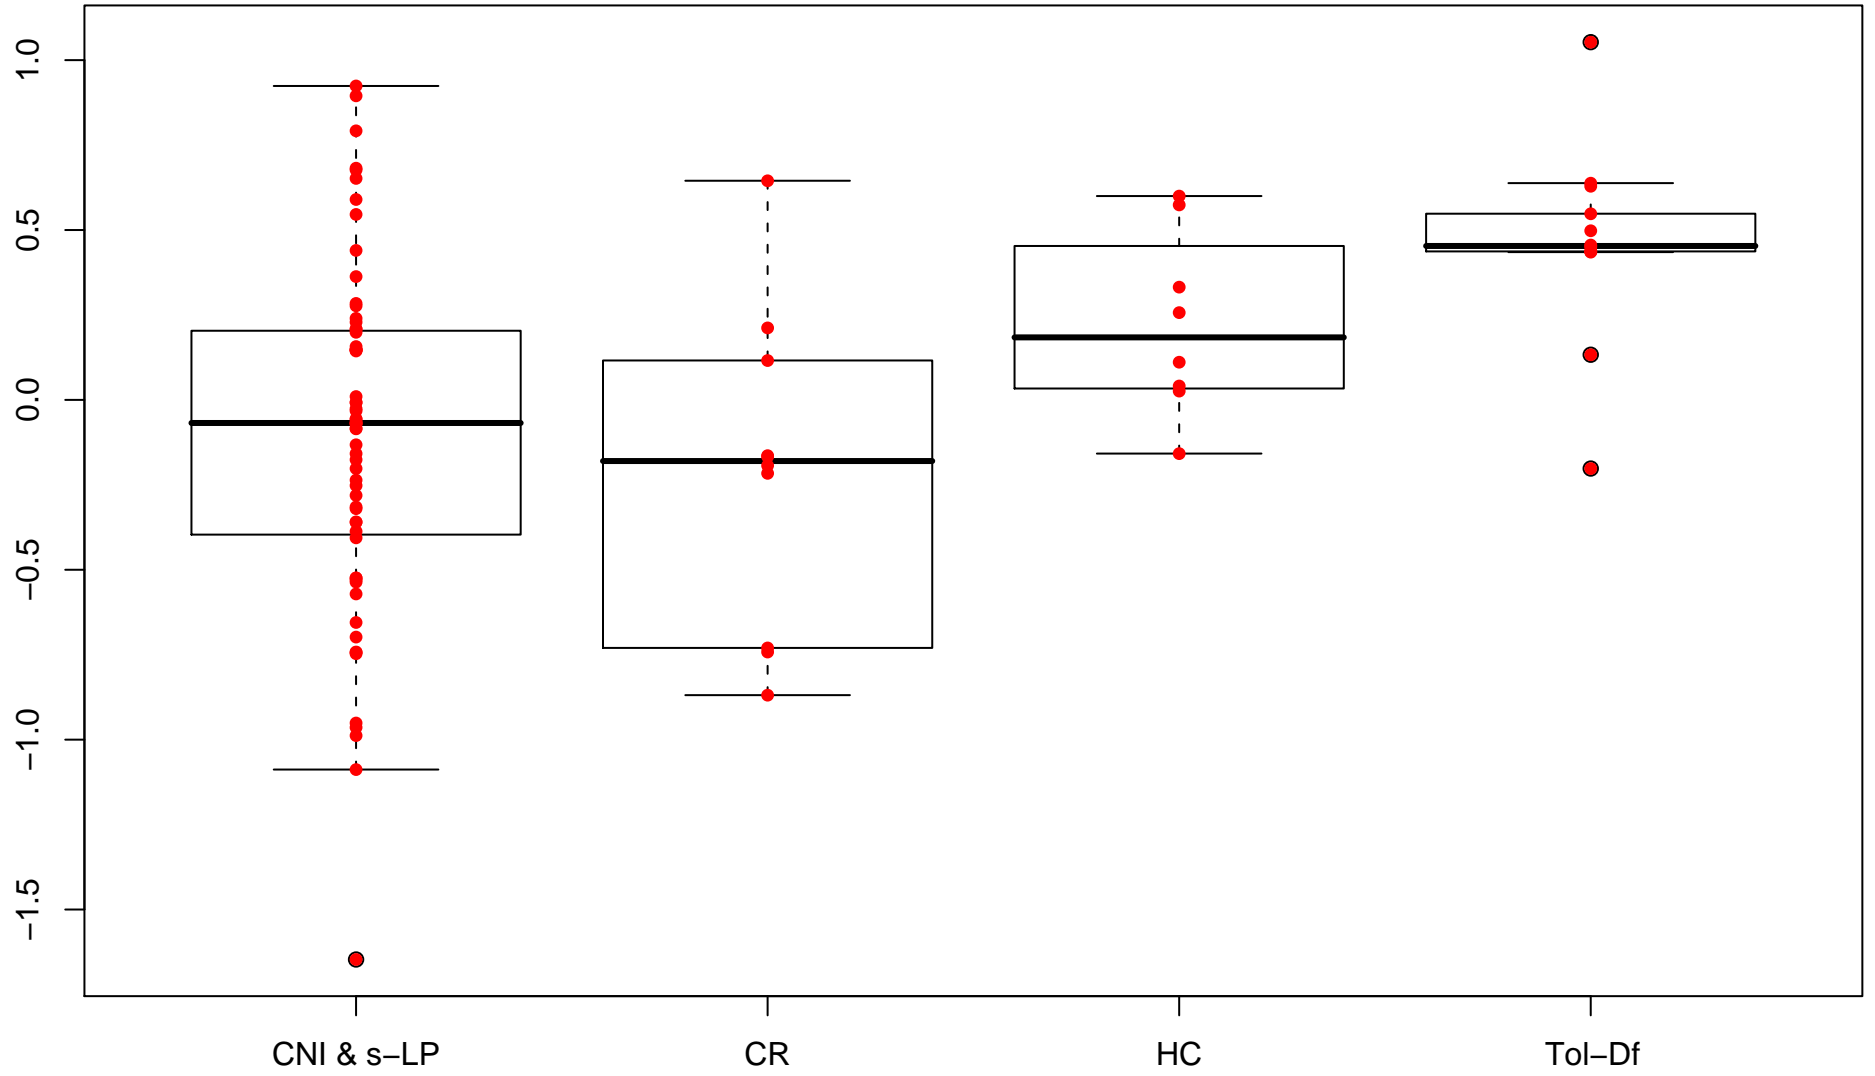

Rank 141 : CHST2  
0.0003439

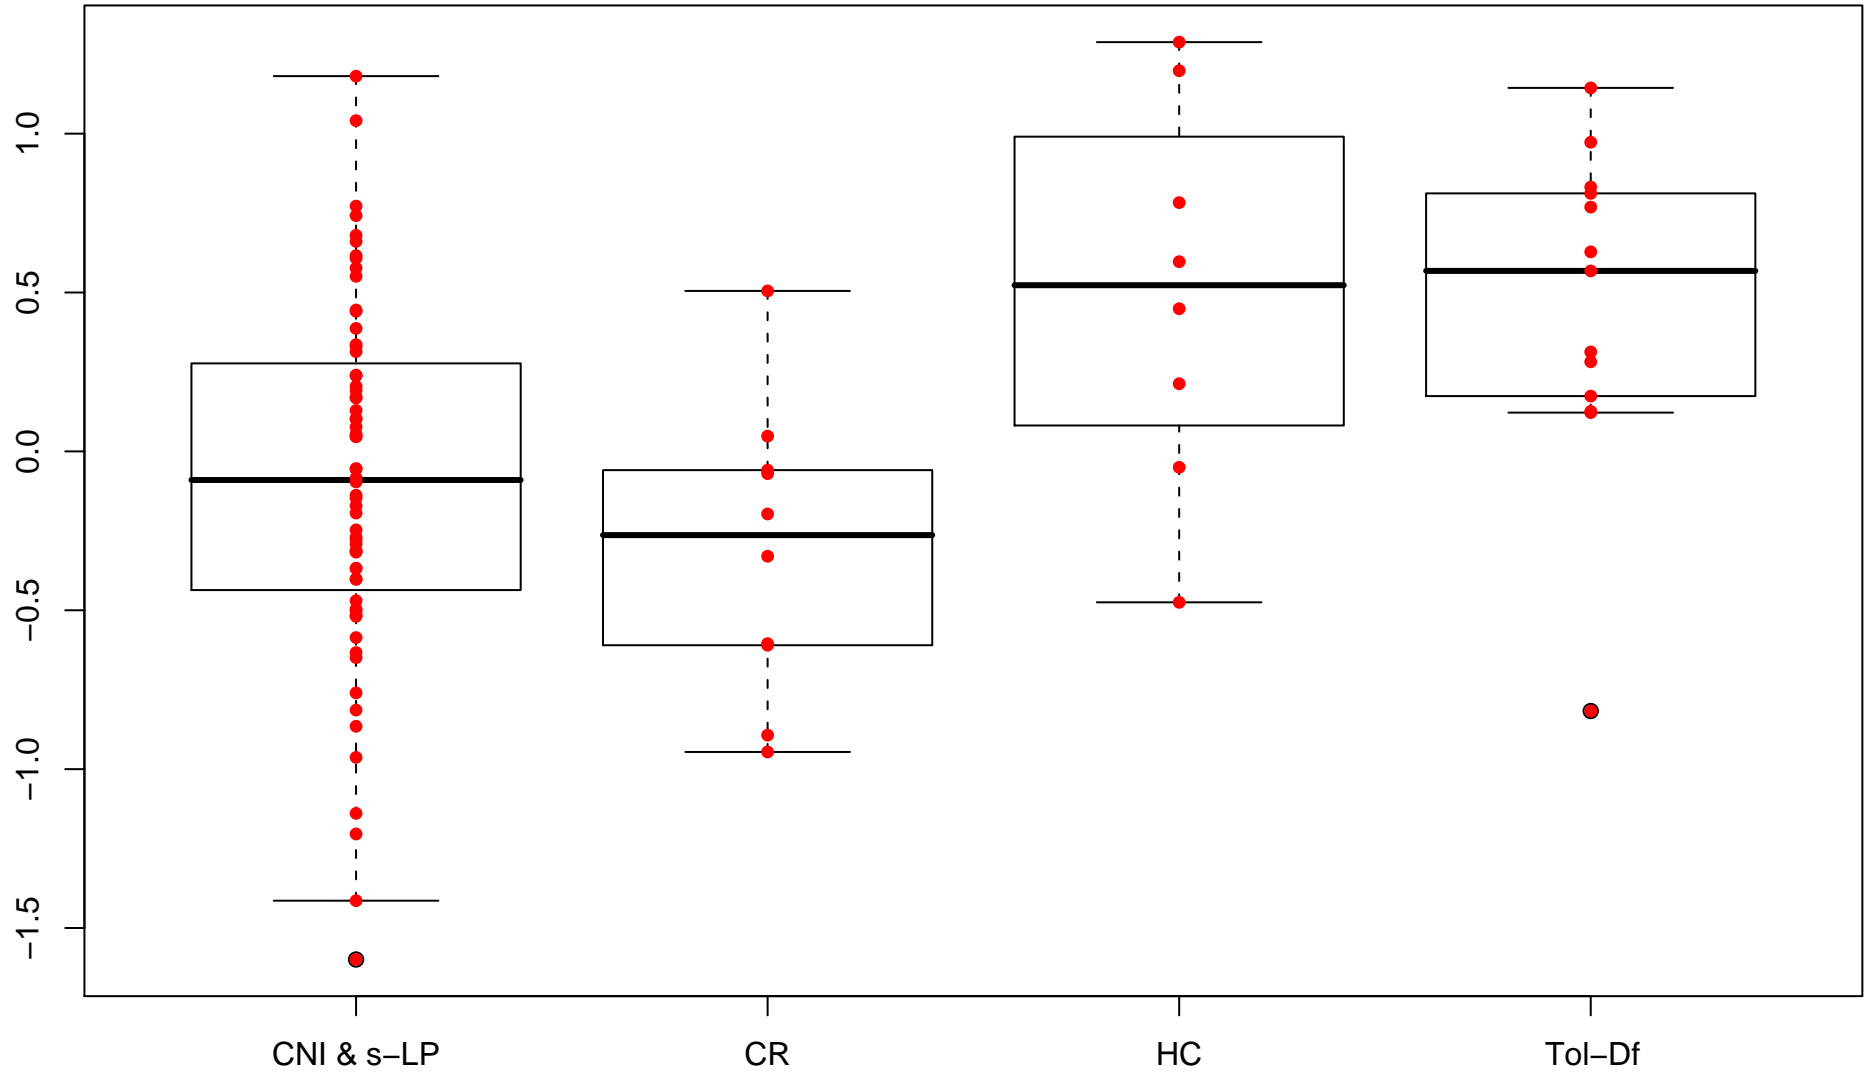

Rank 142 : MUC5AC  
0.0003463

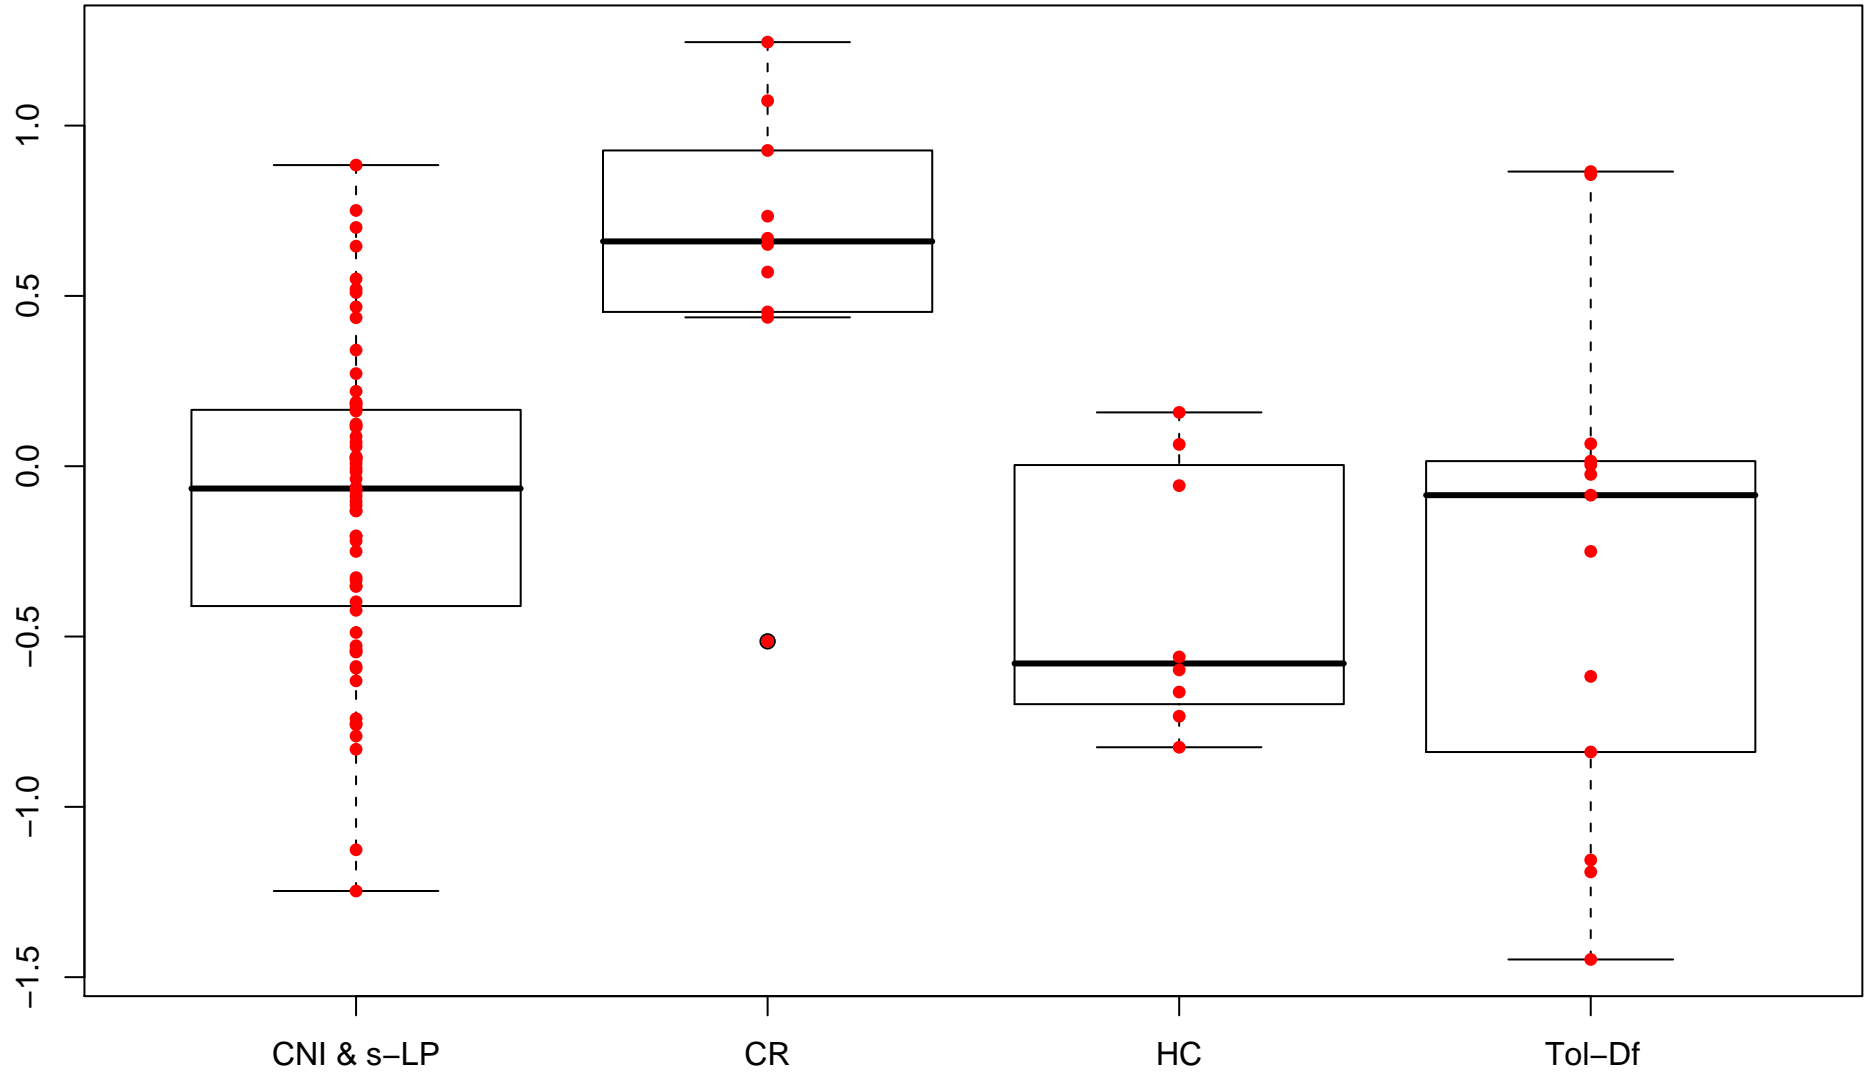

Rank 143 : BCKDHB  
0.0003477

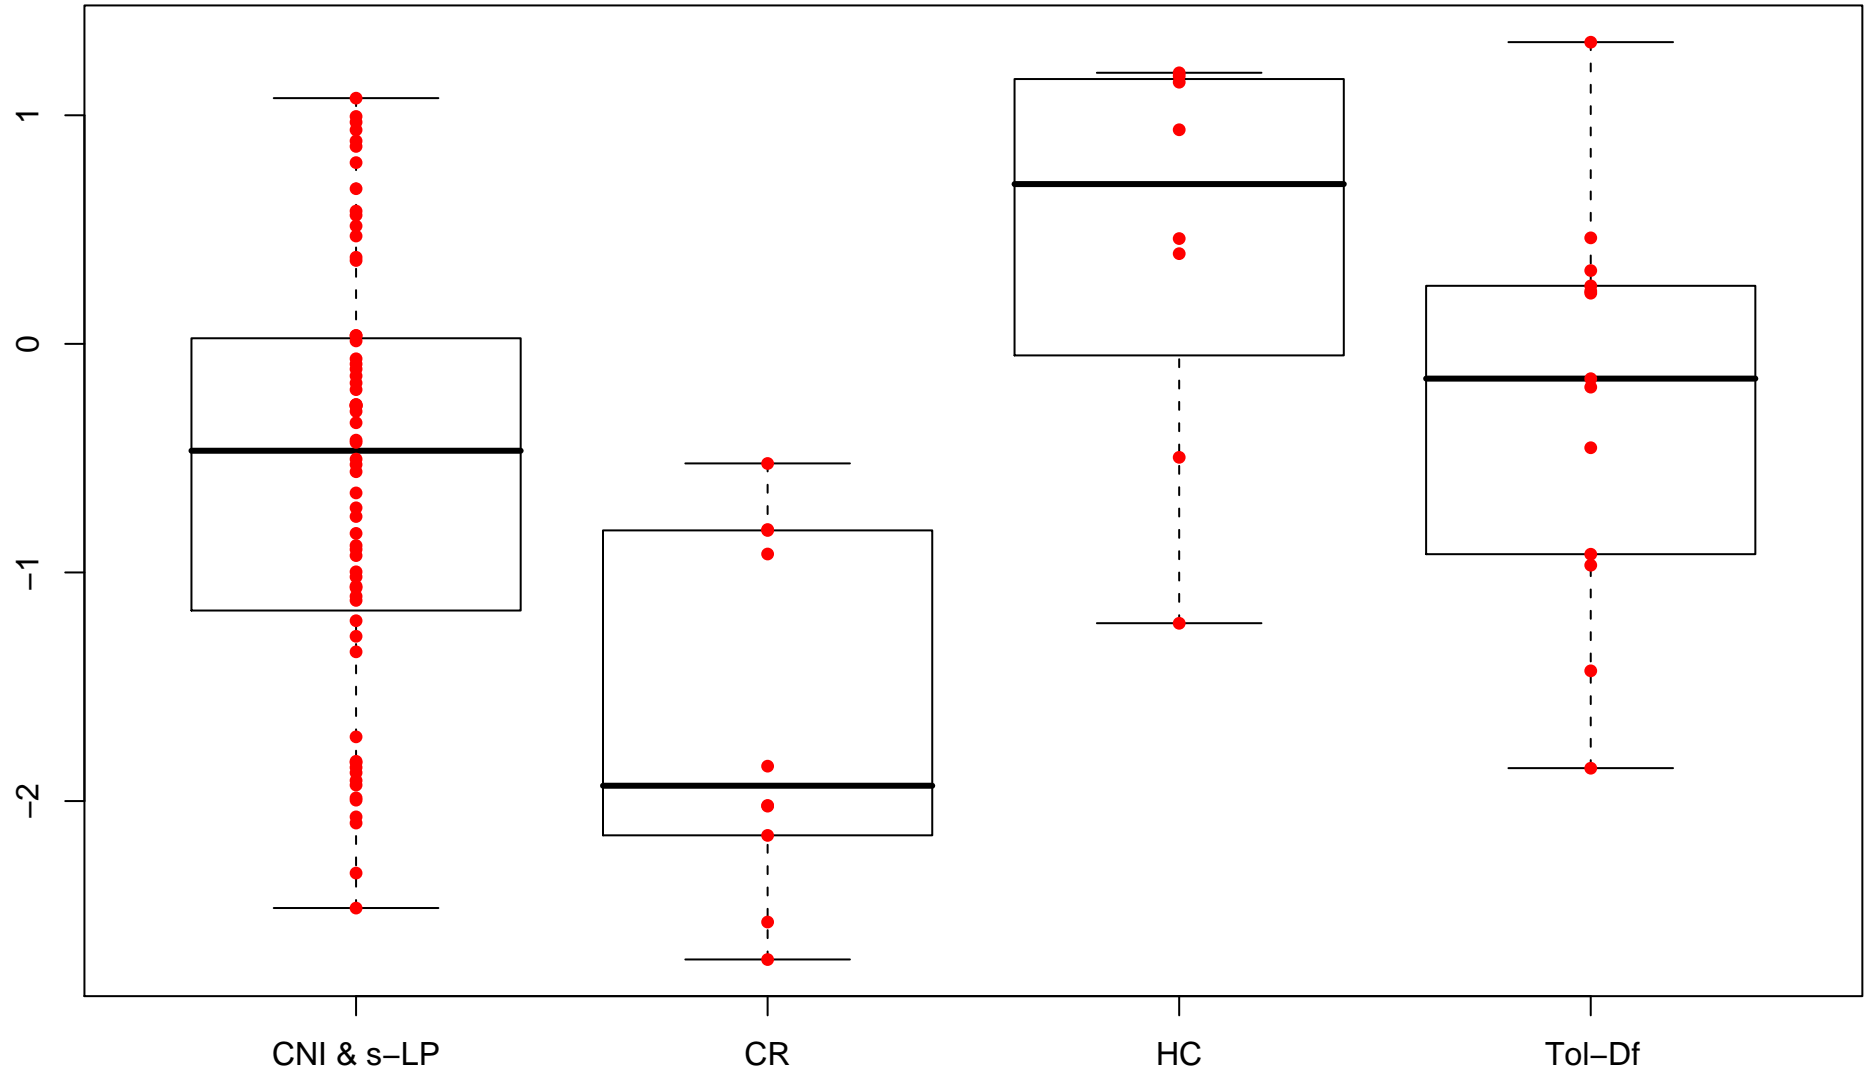

Rank 144 : MTX2  
0.0003486

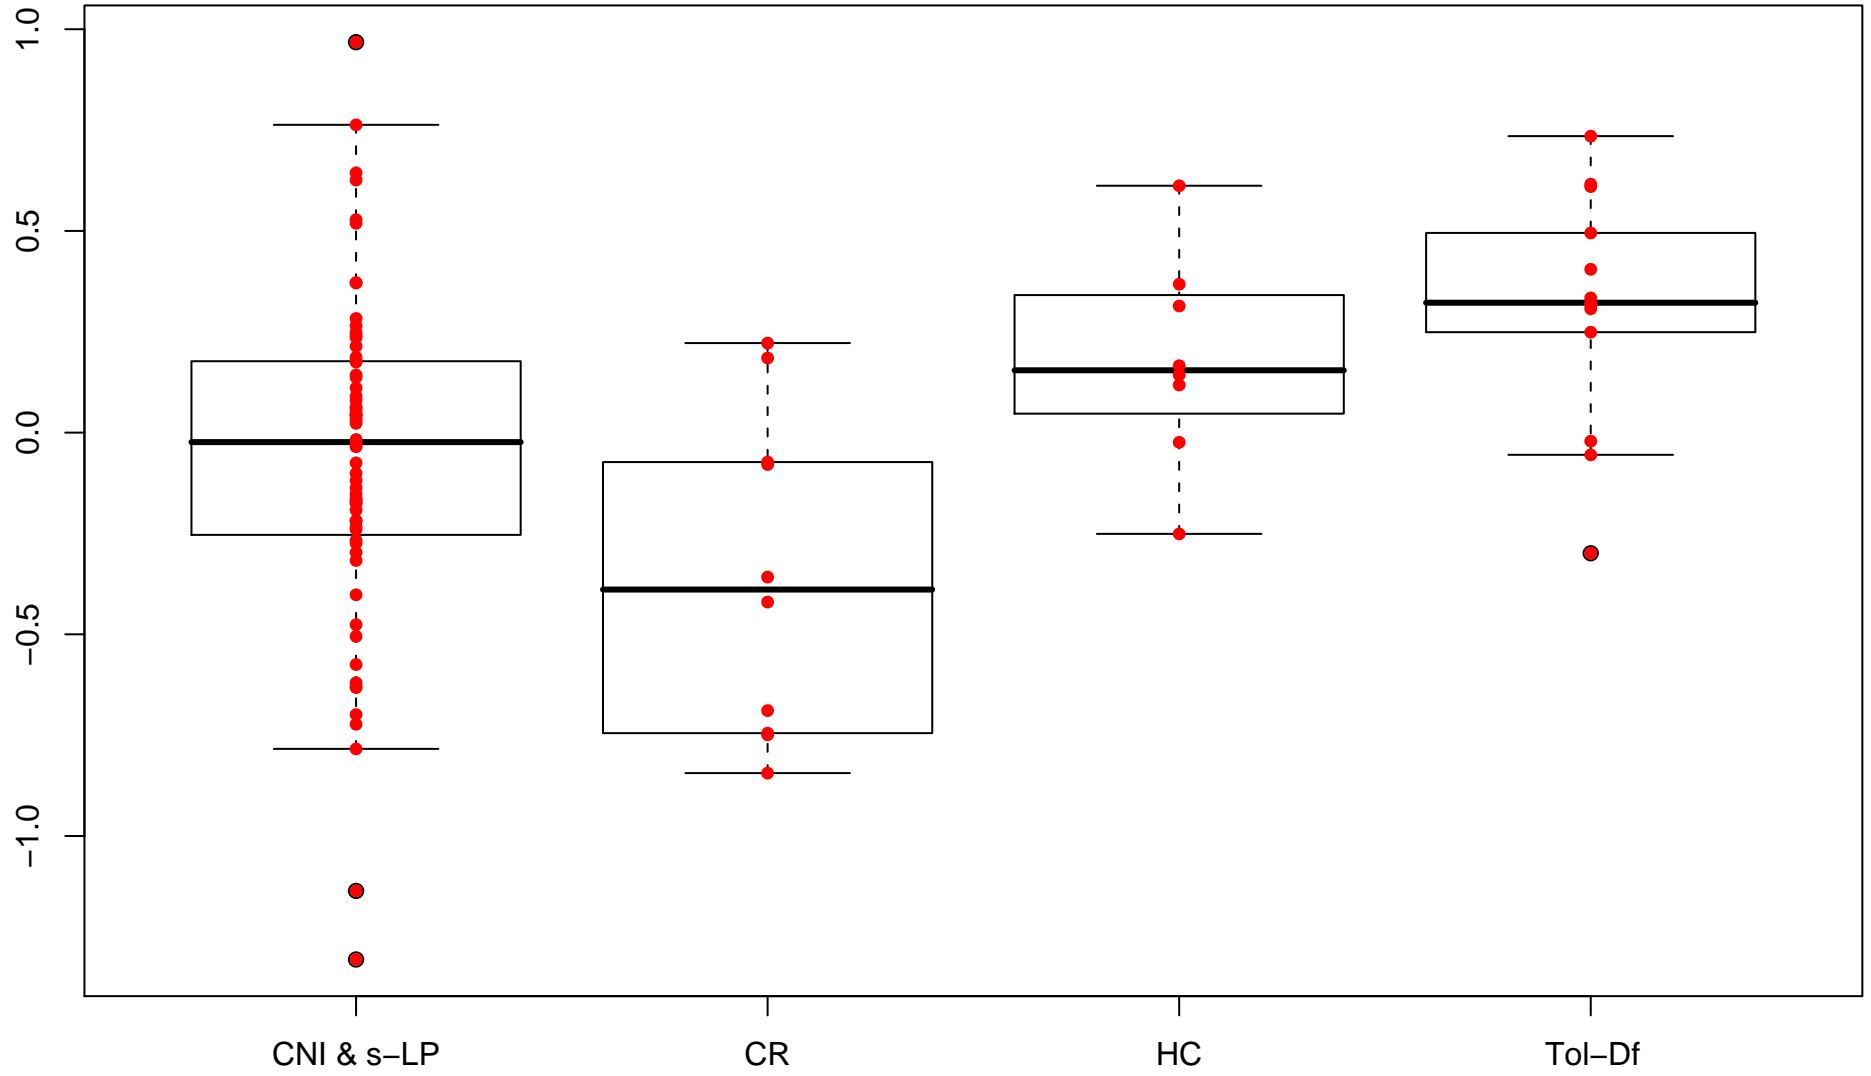

Rank 145 : QSOX1  
0.0003567

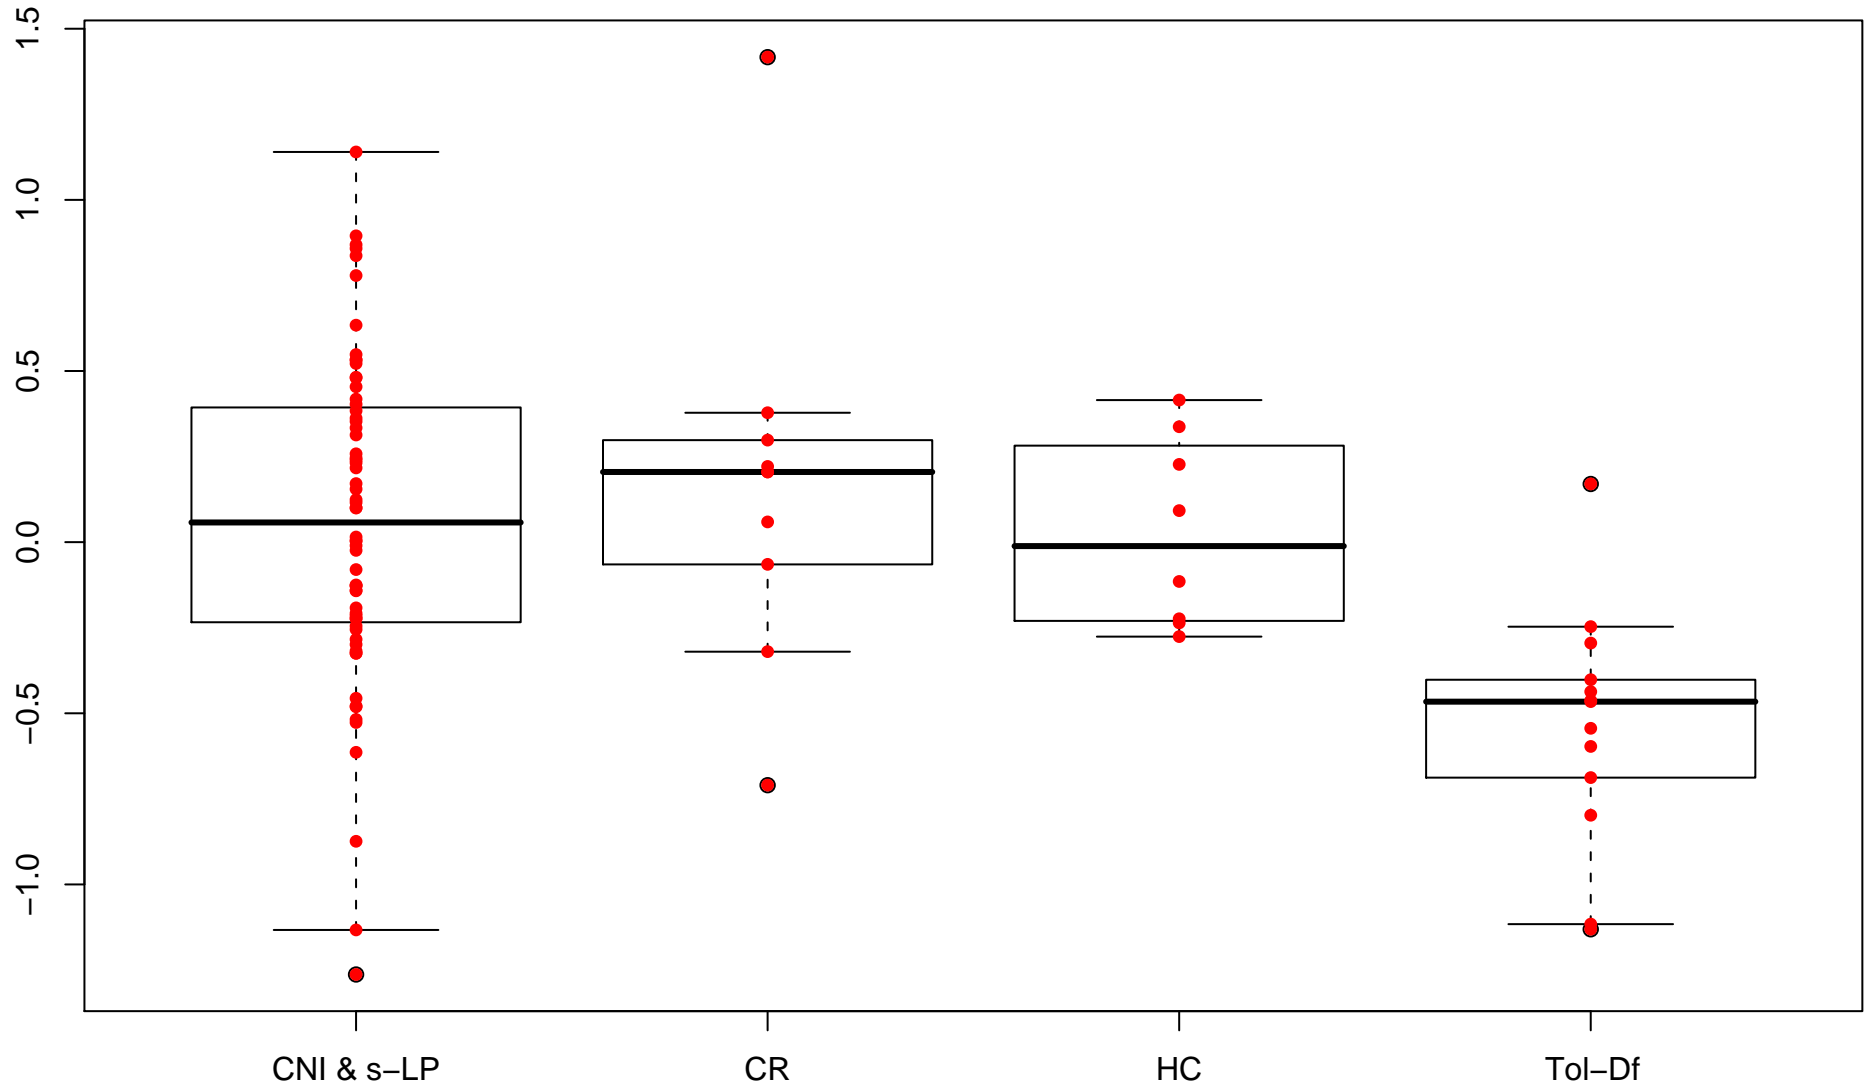

Rank 146 : PKM2  
0.000365

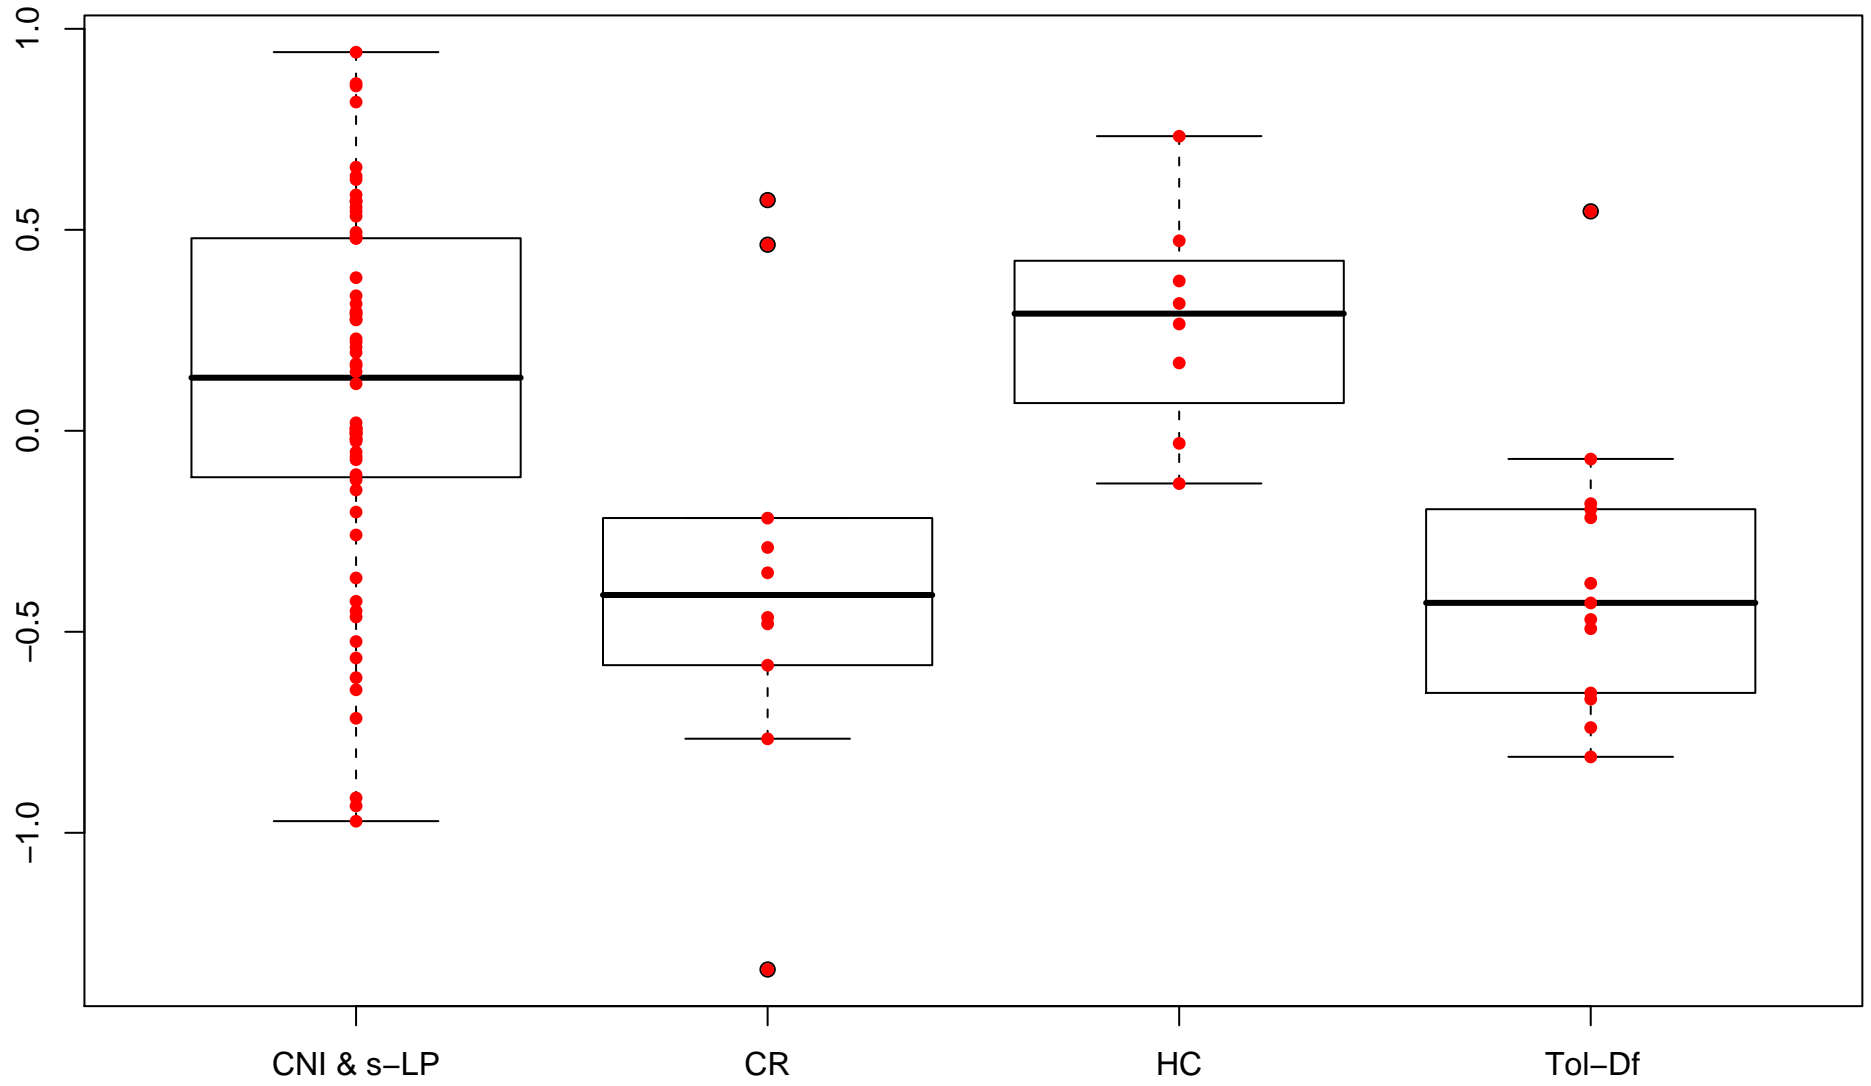



Rank 147 : ITGB1BP1  
0.0003666

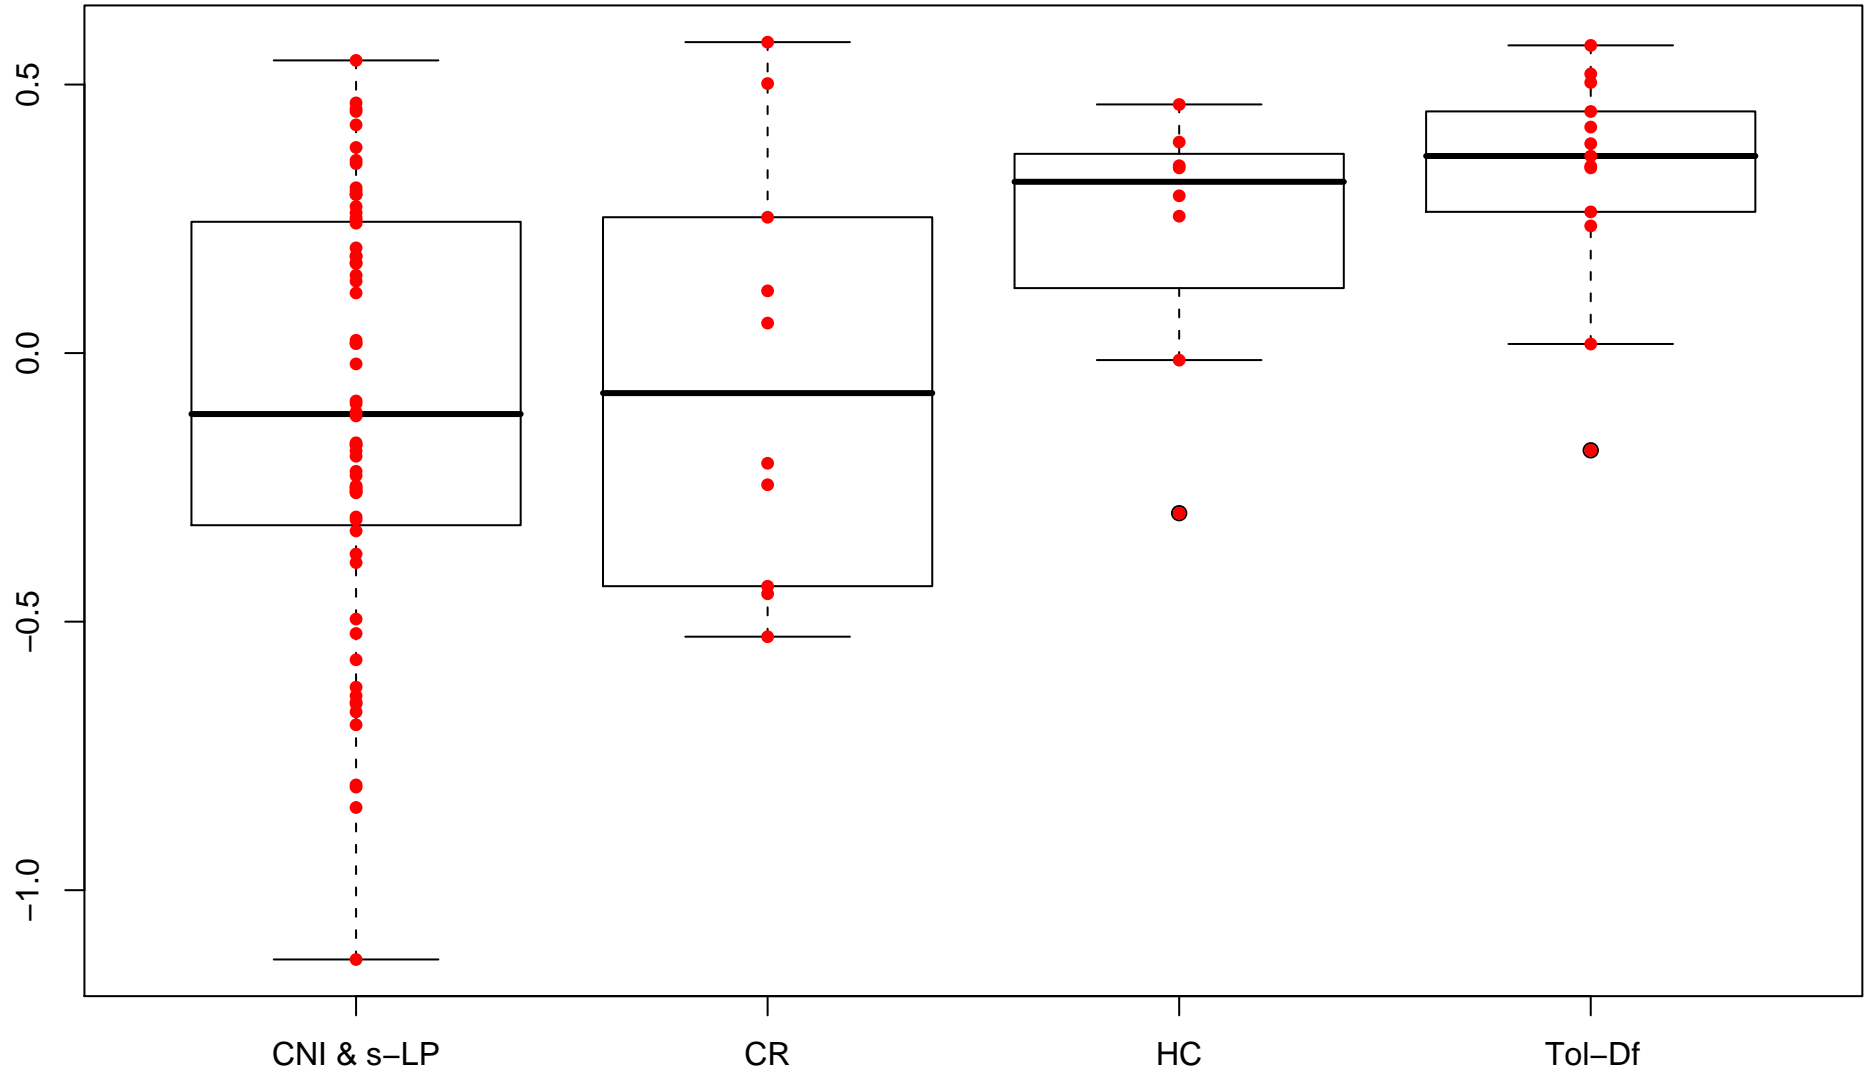

Rank 148 : CD7  
0.0003692

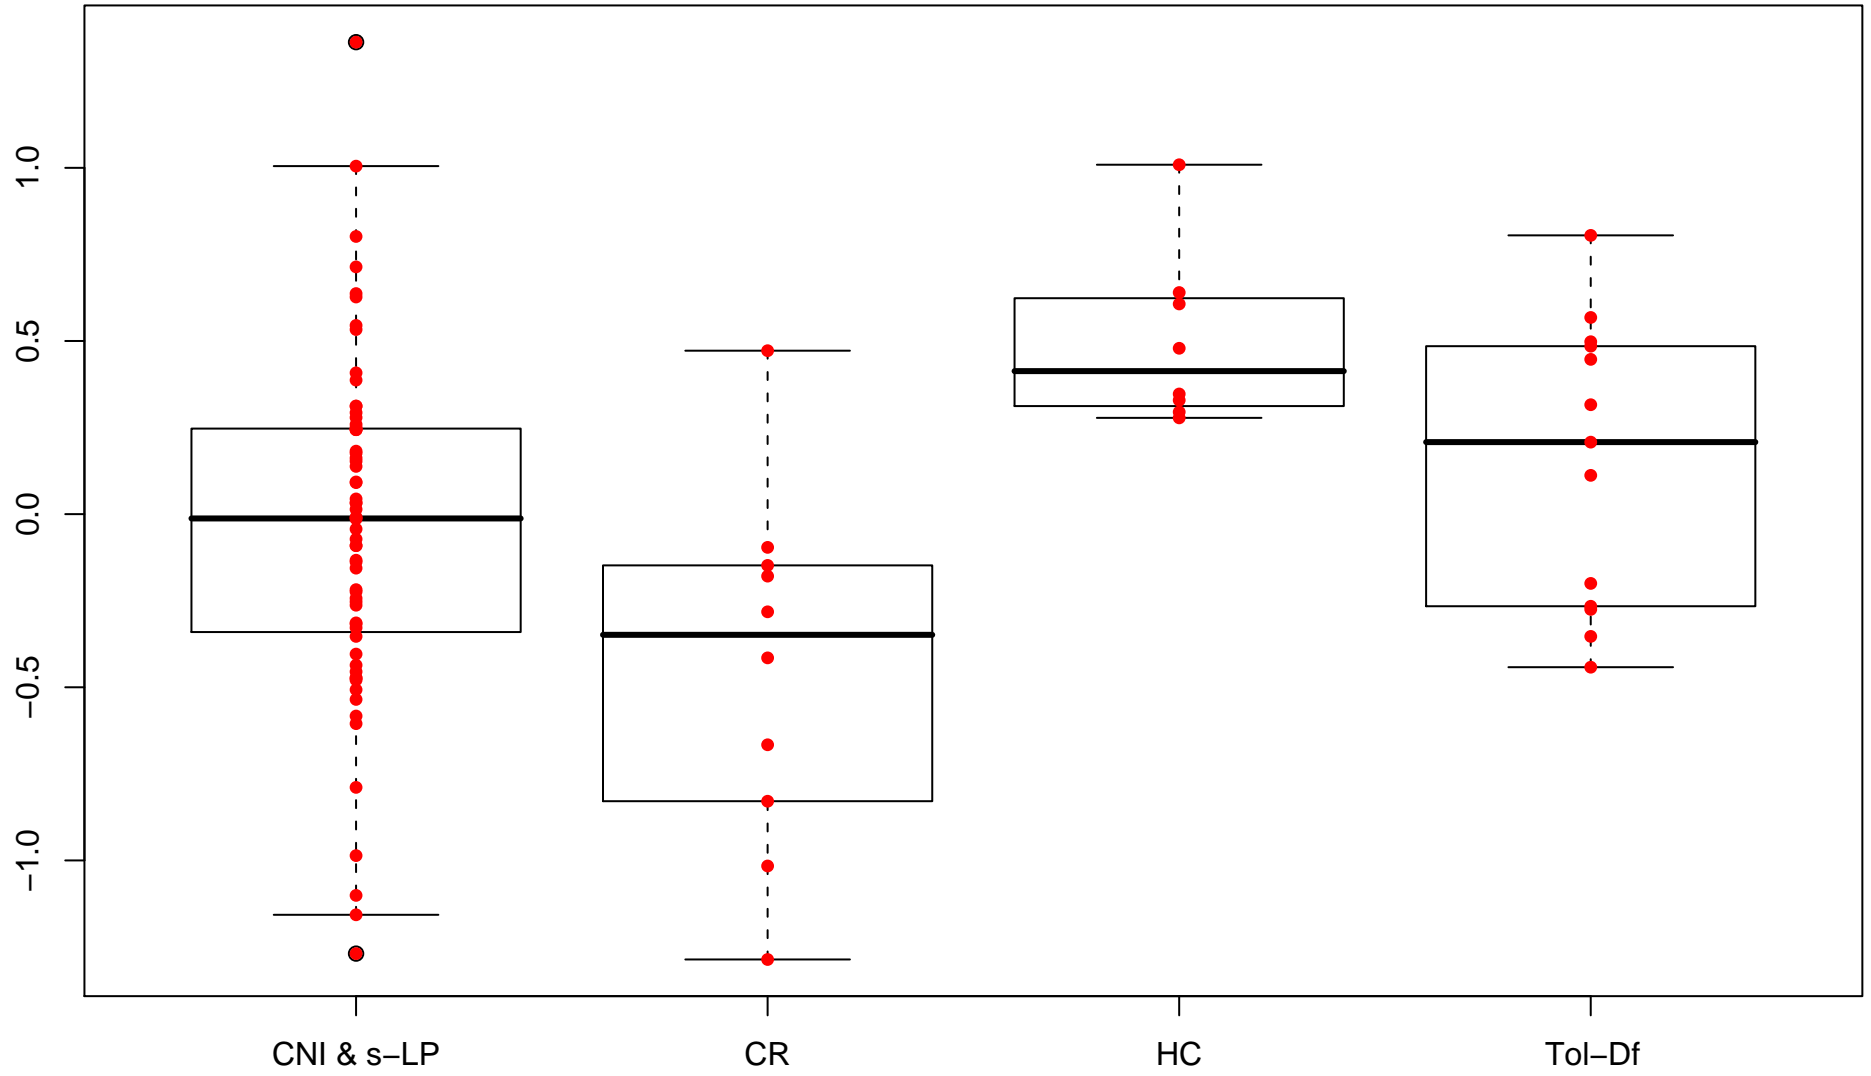

Rank 149 : ACOT2  
0.0003761

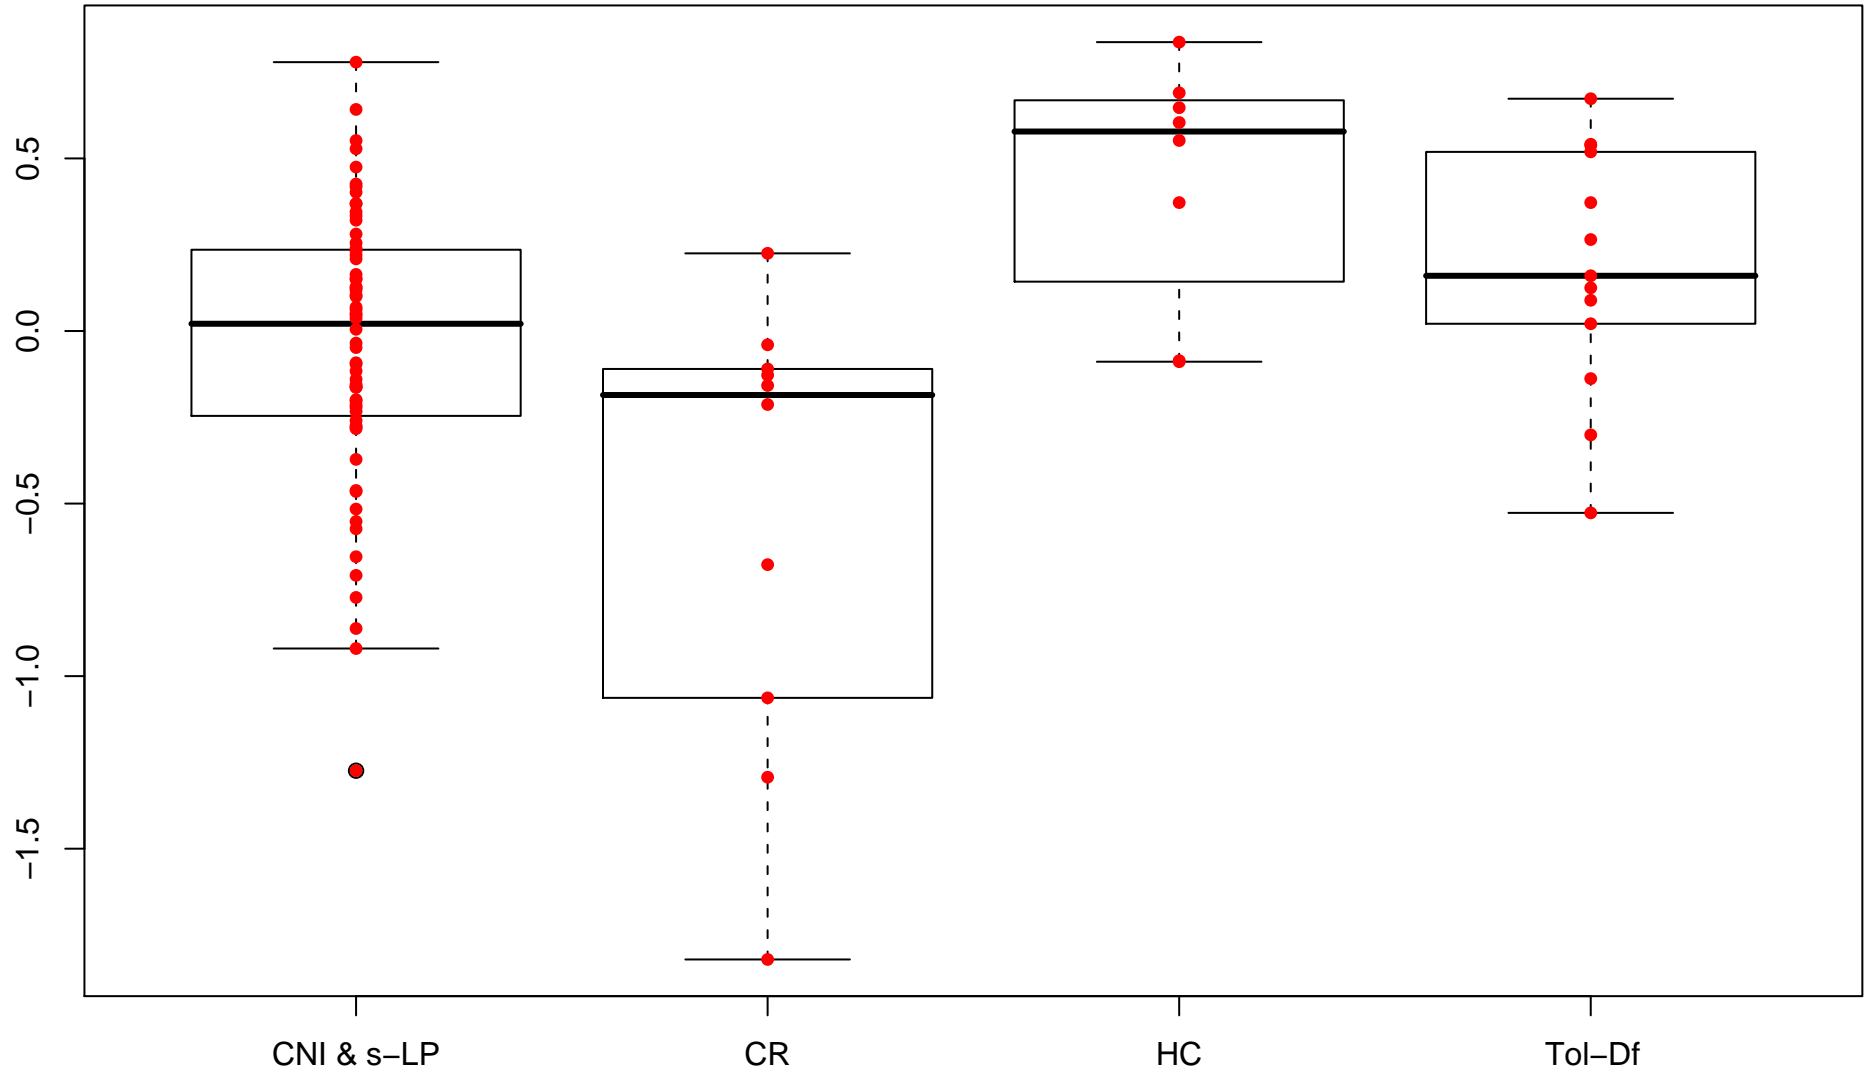

Rank 150 : SEPT3  
0.0003771

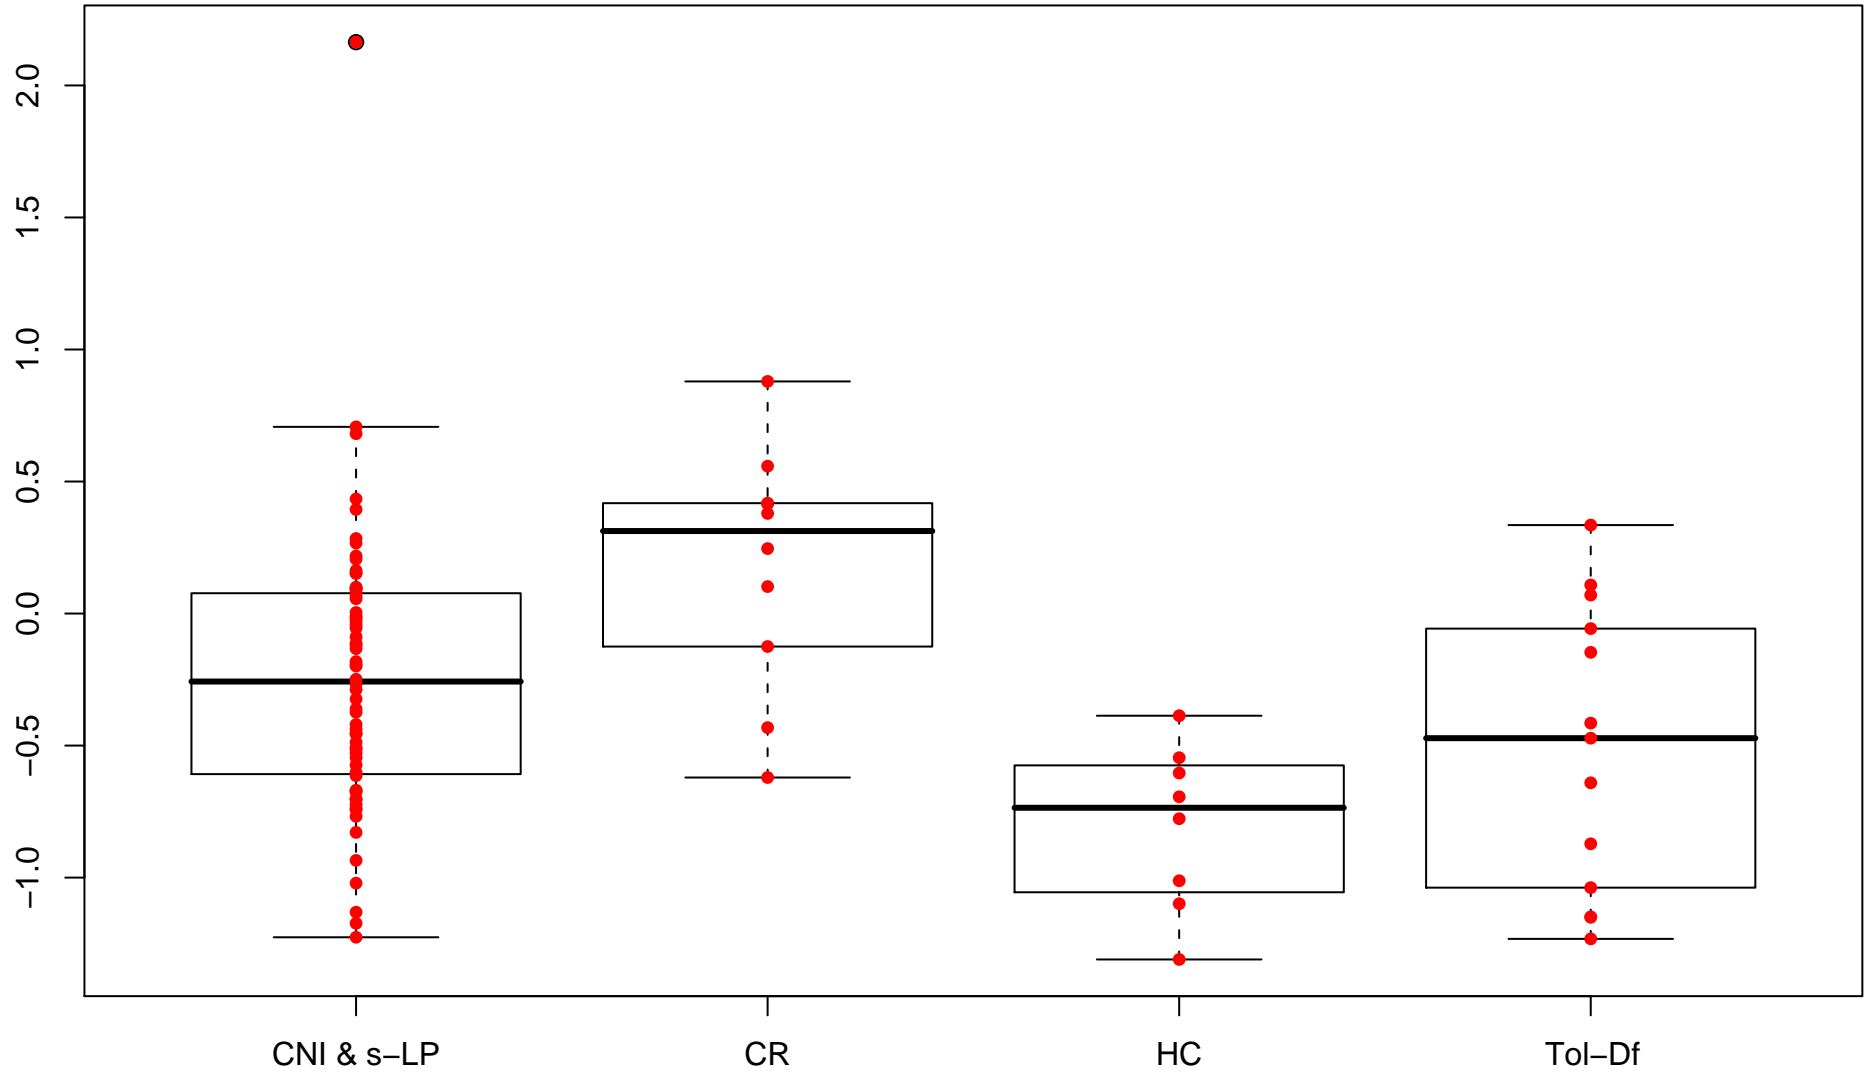

Rank 151 : RTN3  
0.0003799

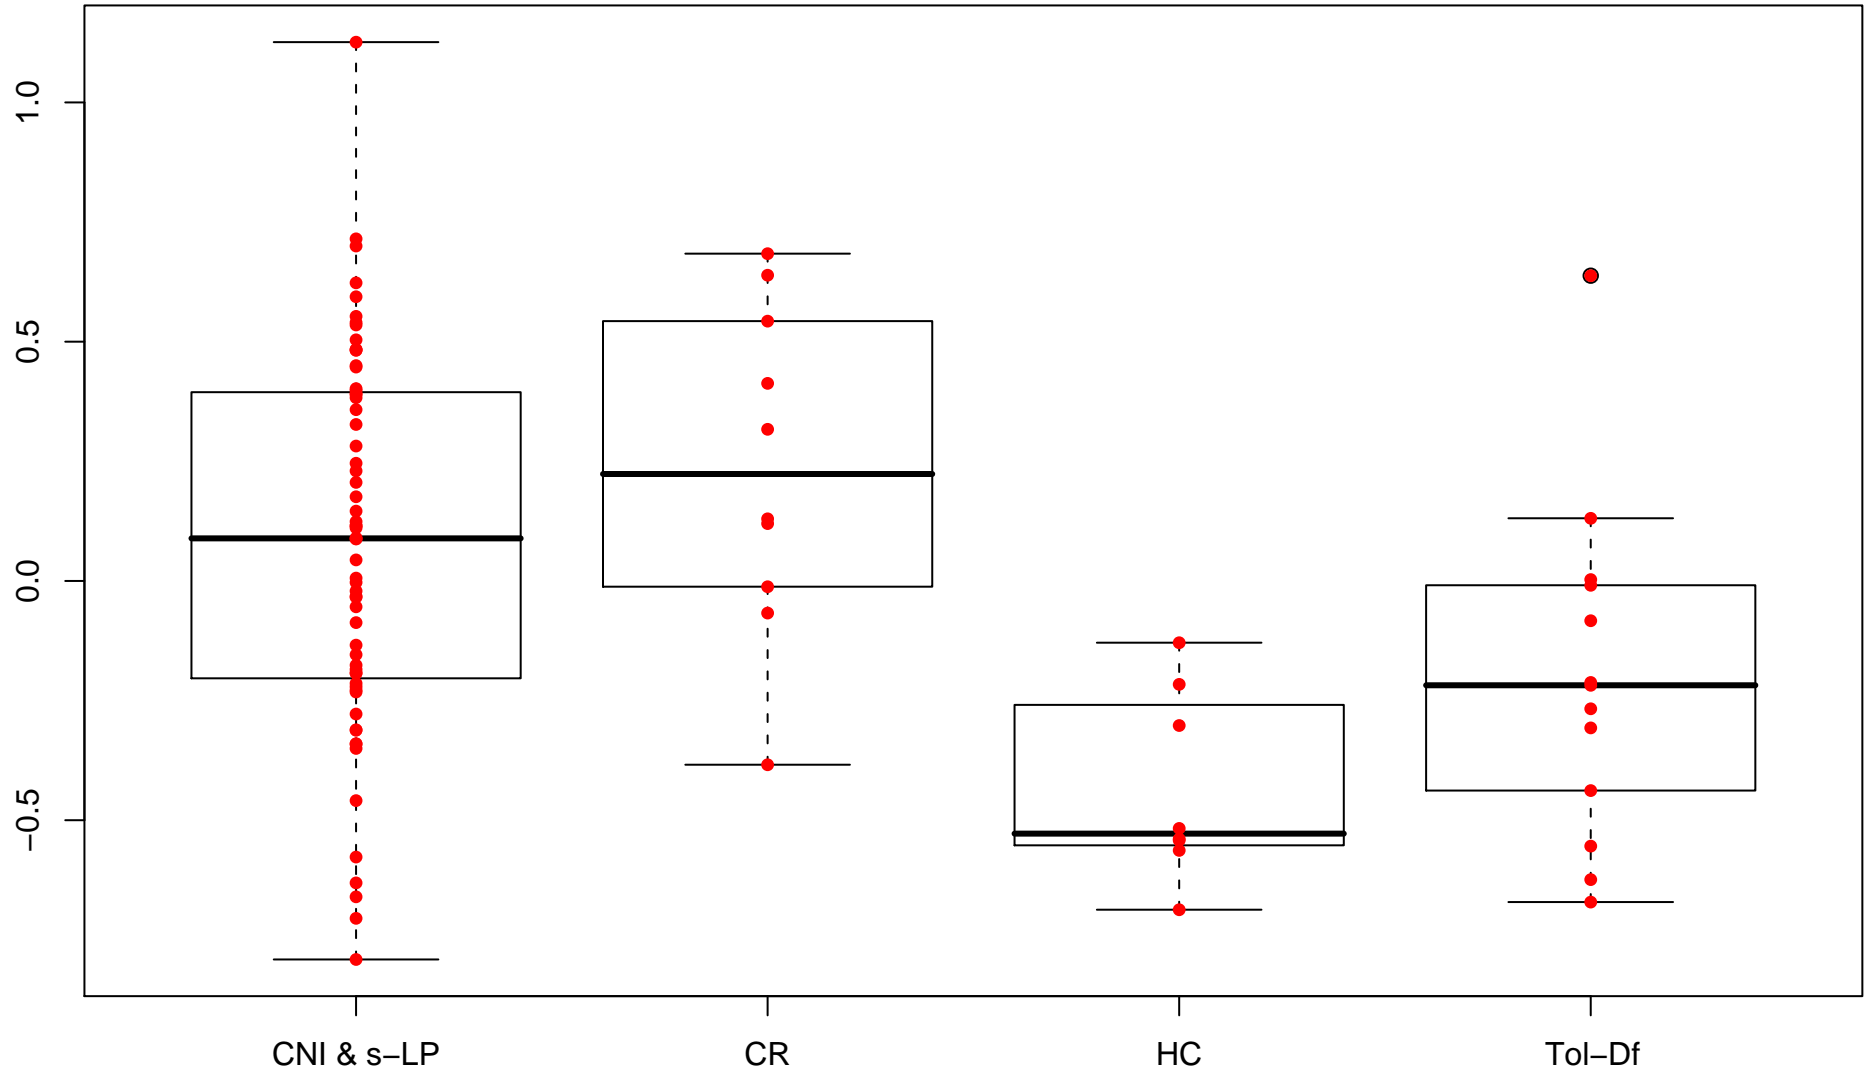

Rank 152 : FKBP5  
0.0003804

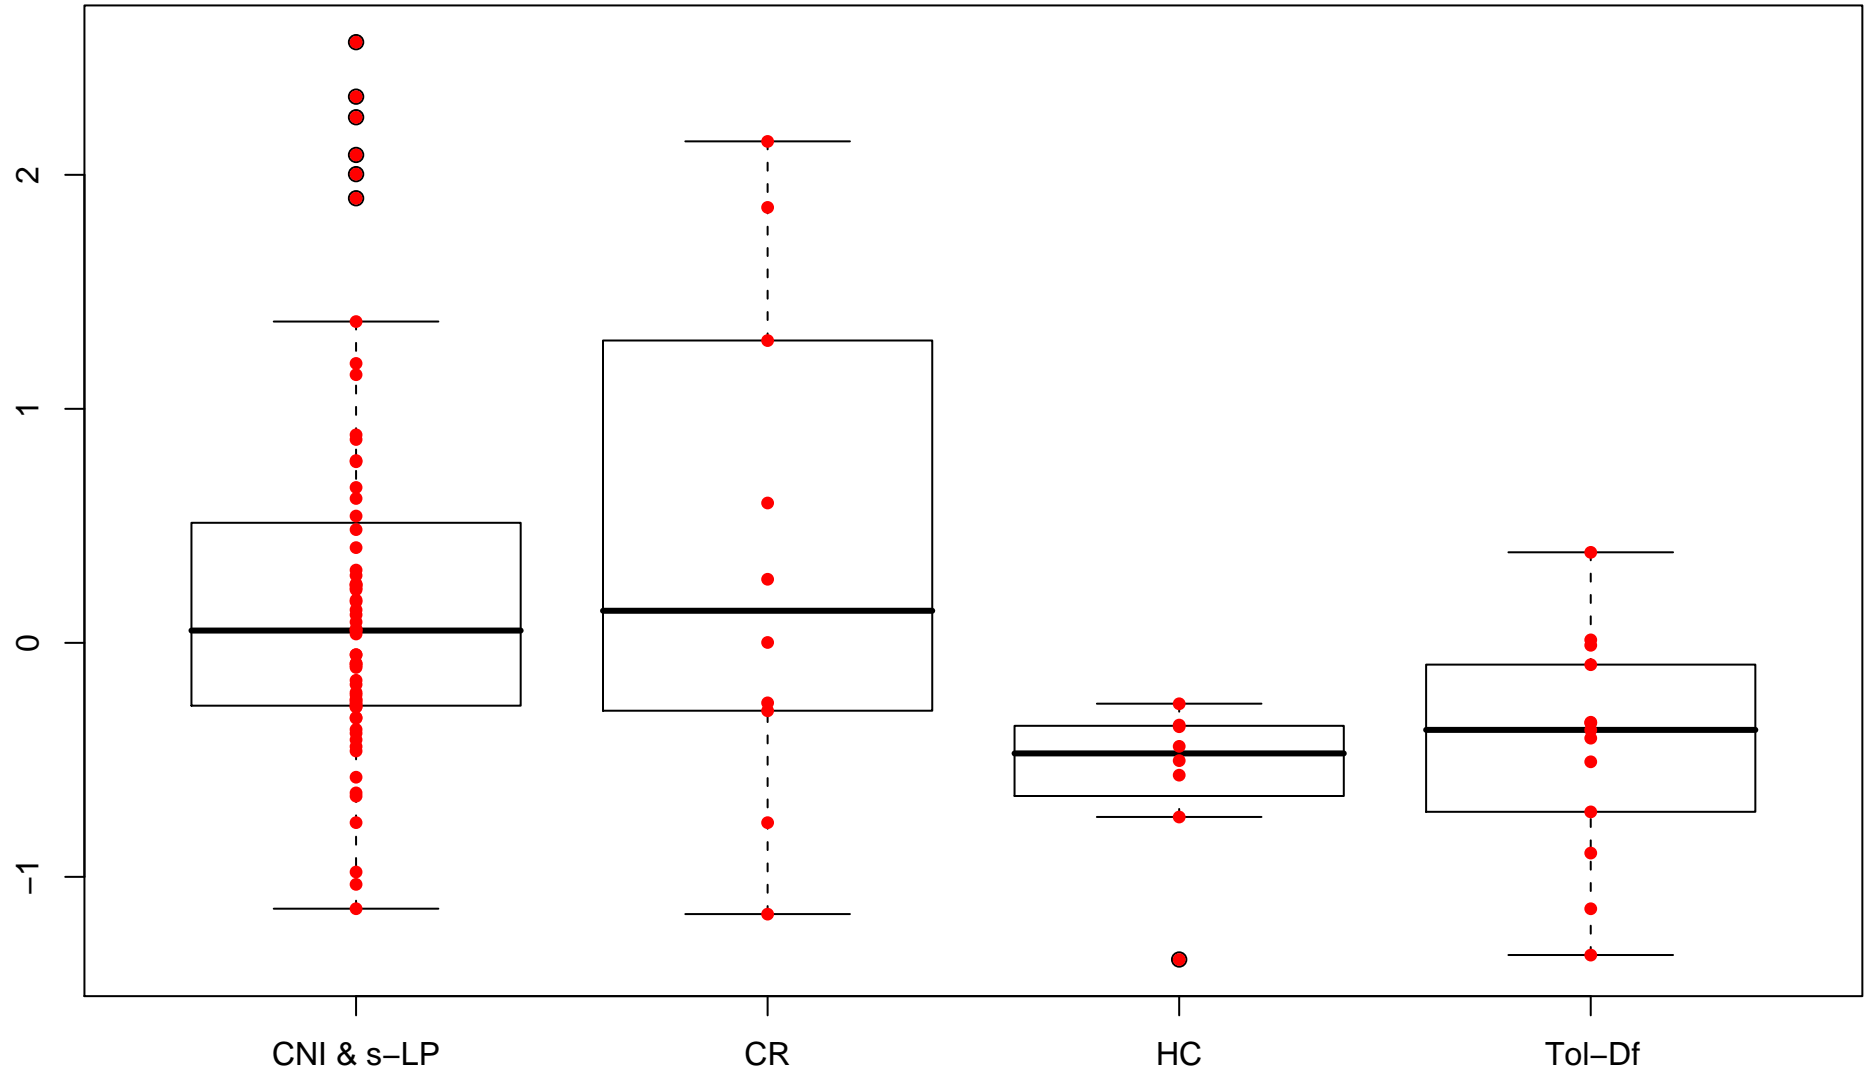

Rank 153 : CD40LG  
0.0003853

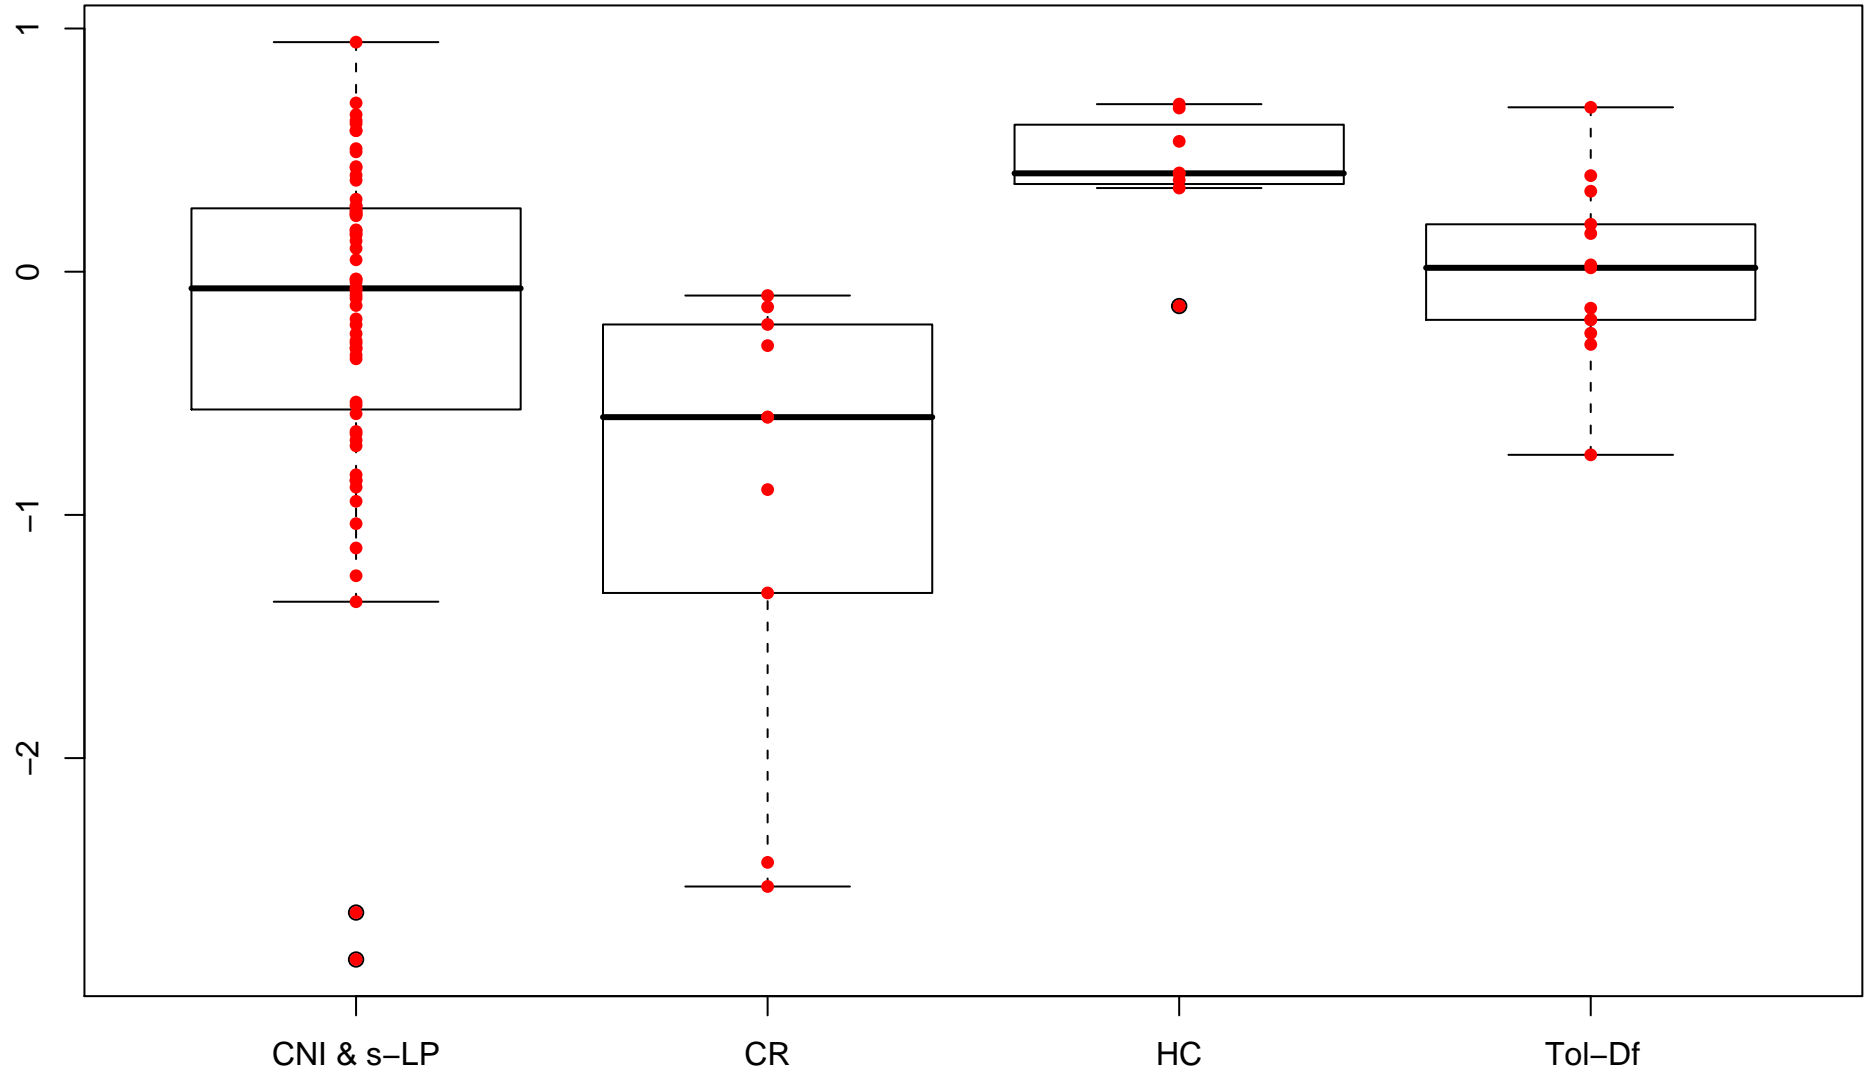

Rank 154 : AIM1

0.0003882

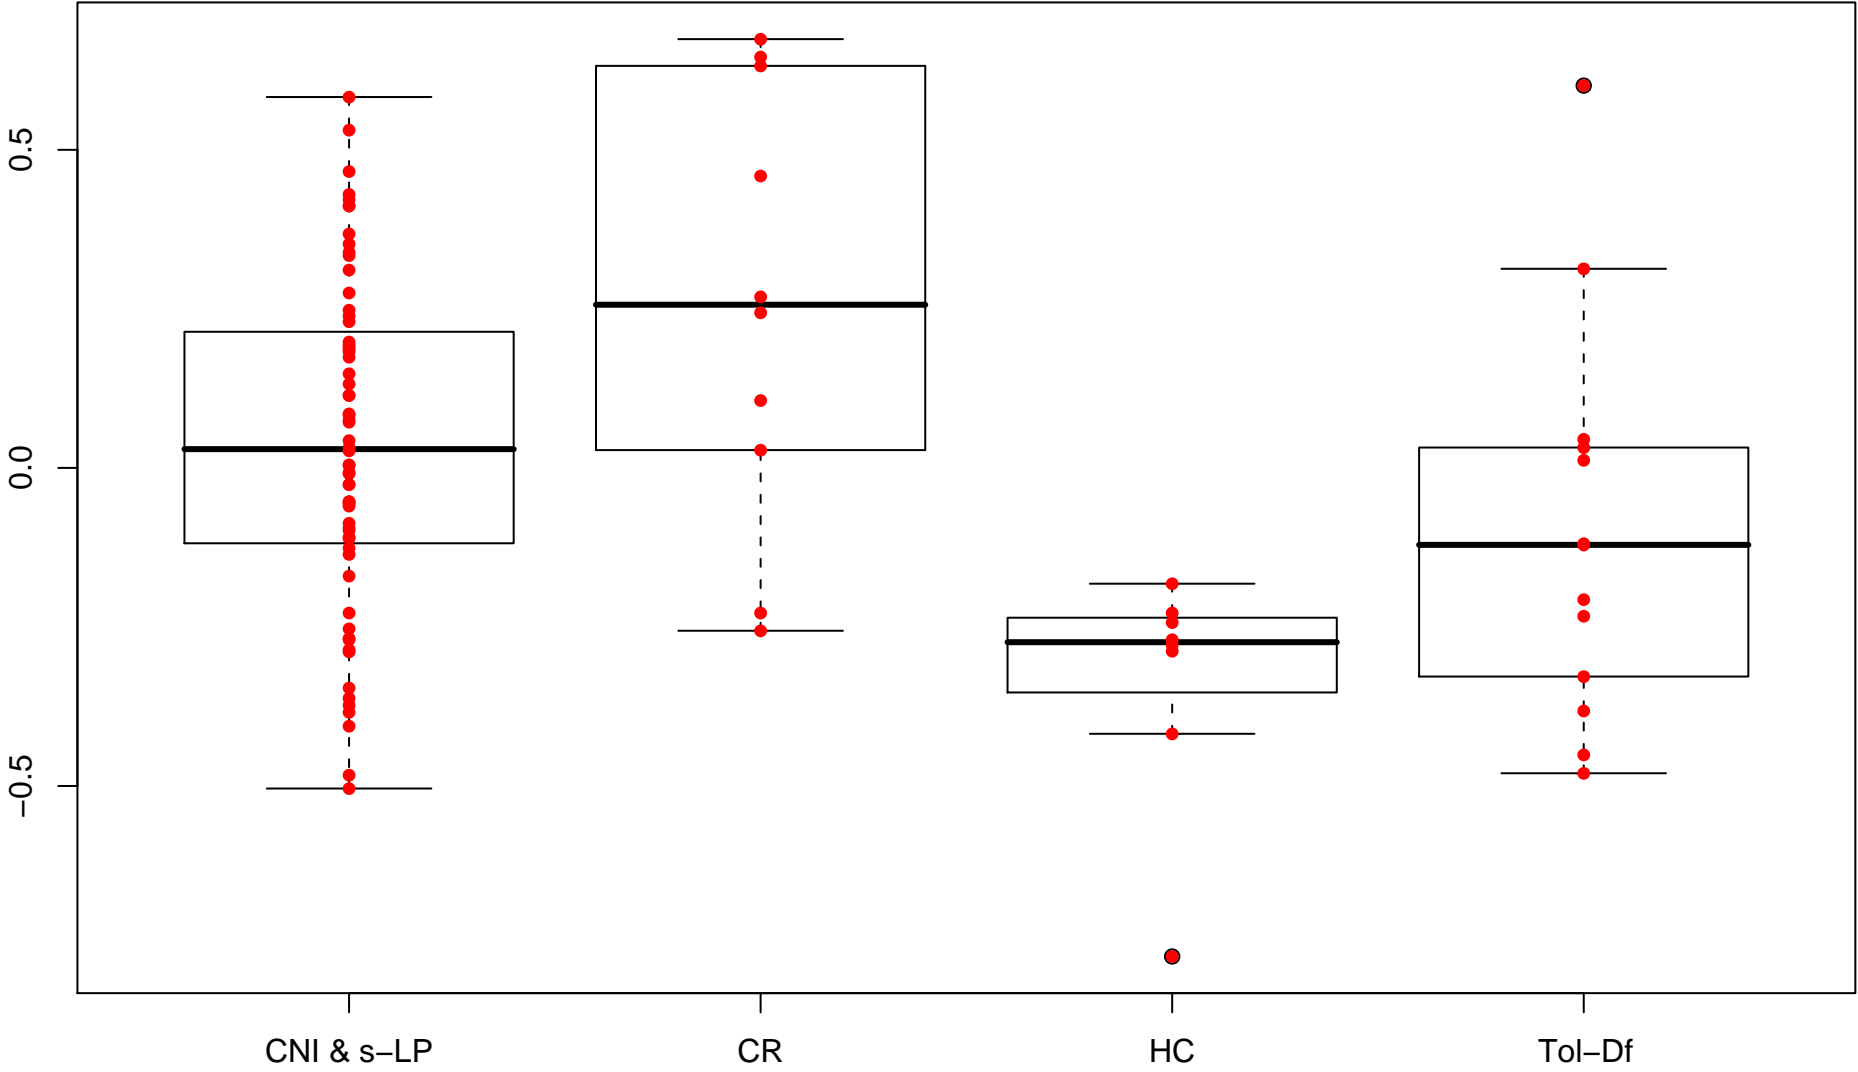



Rank 155 : FANK1  
0.0003884

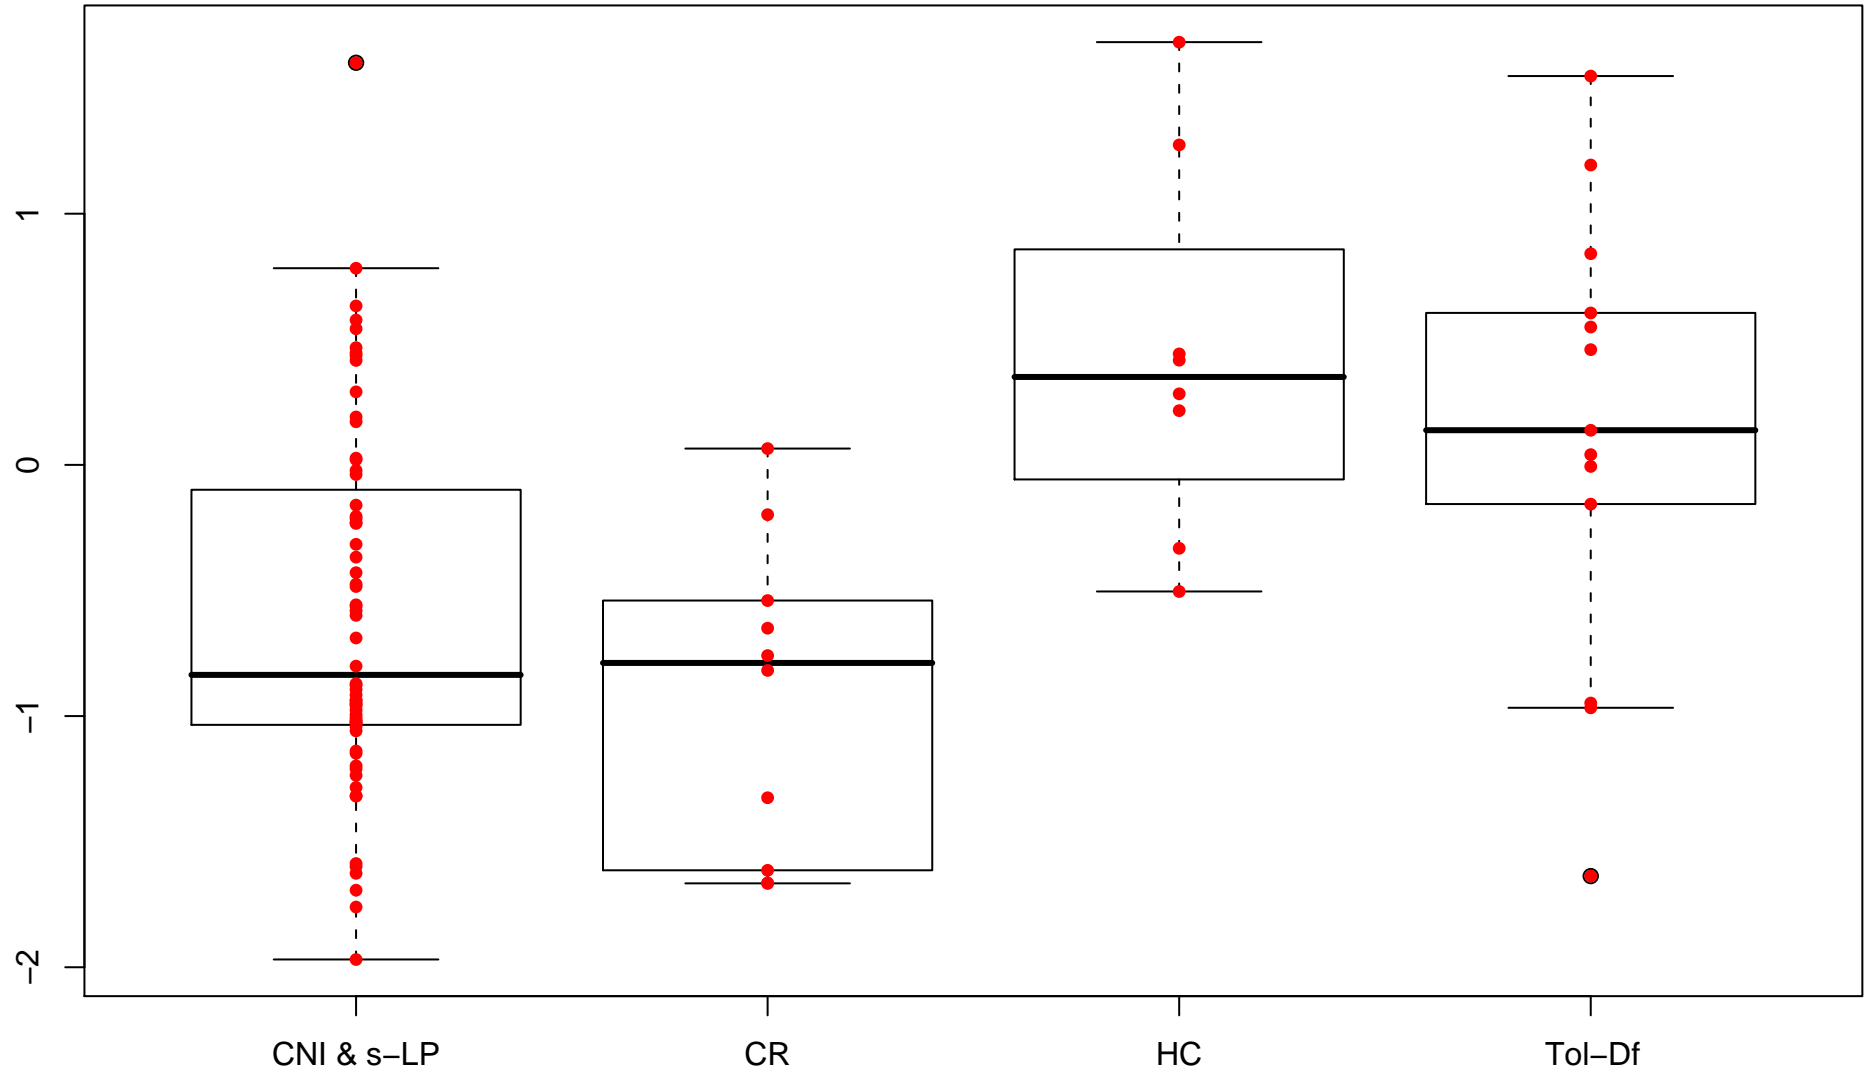

Rank 156 : DNMT1  
0.0003952

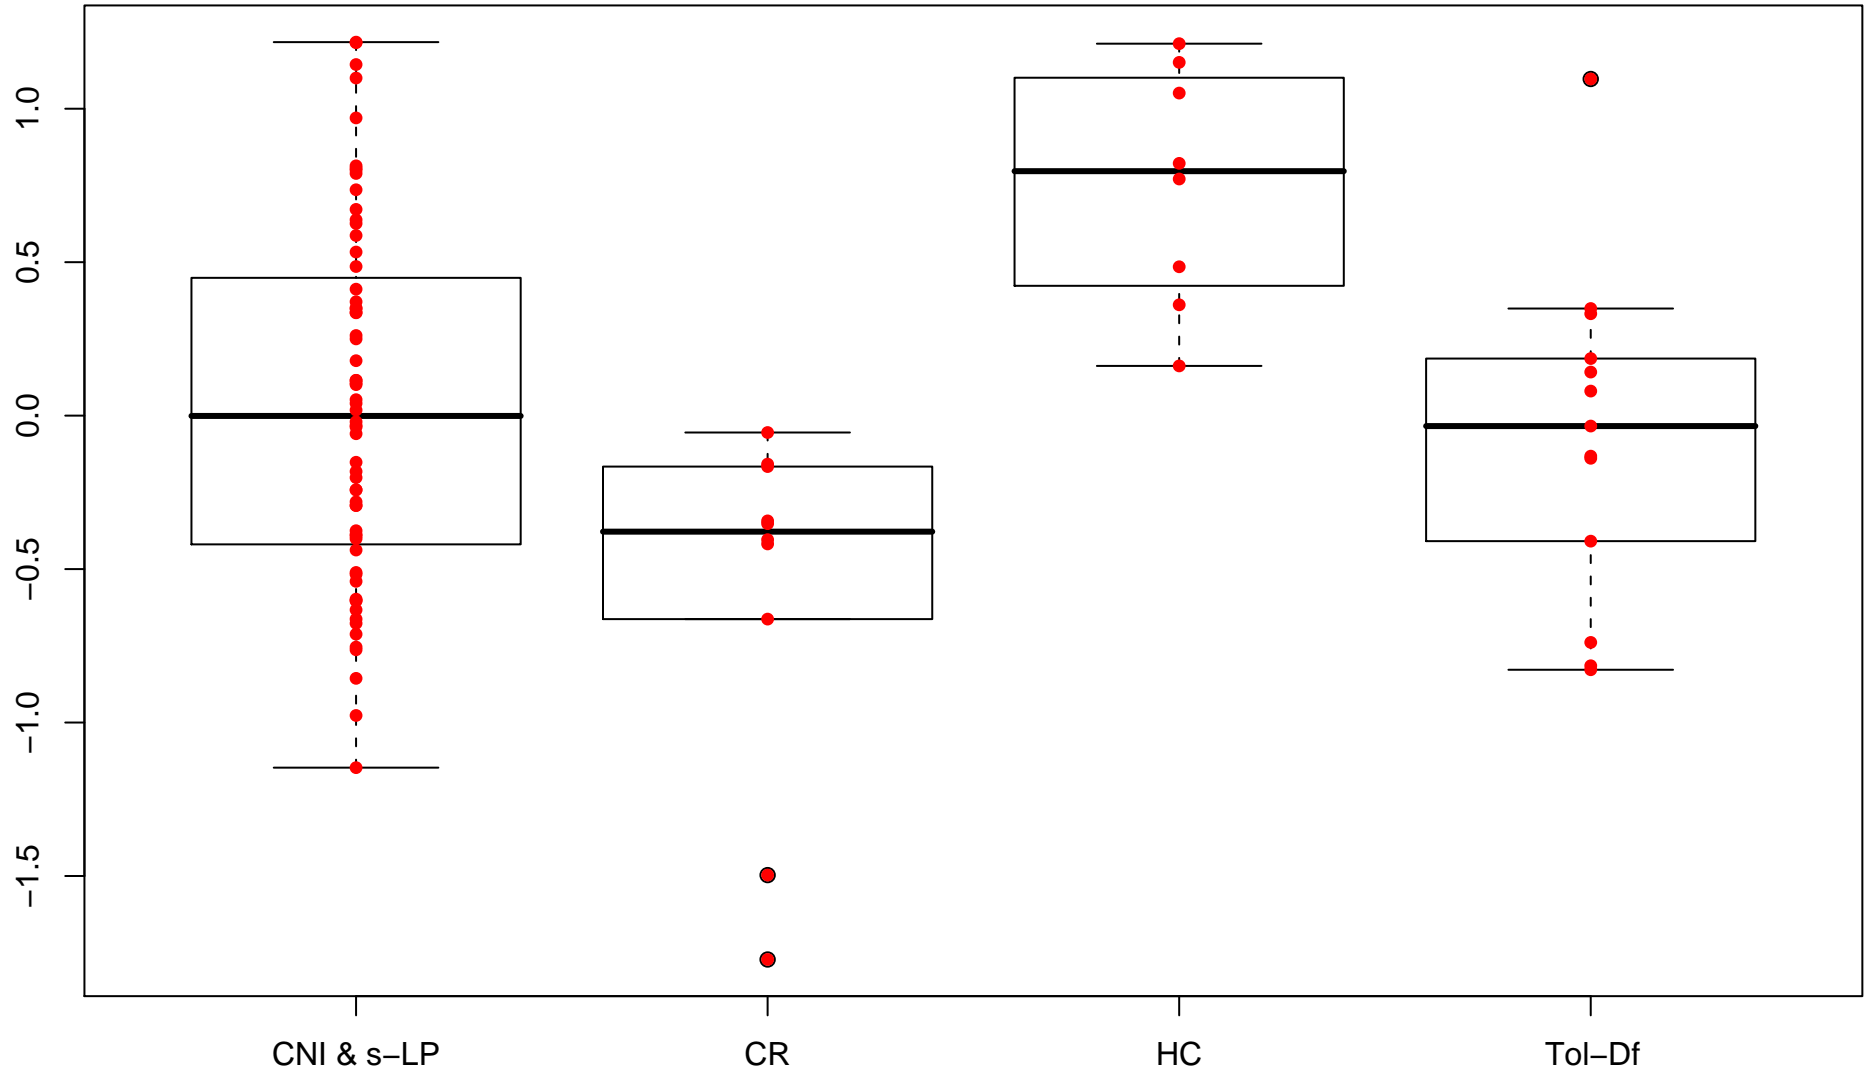

Rank 157 : AK3L1  
0.0004051

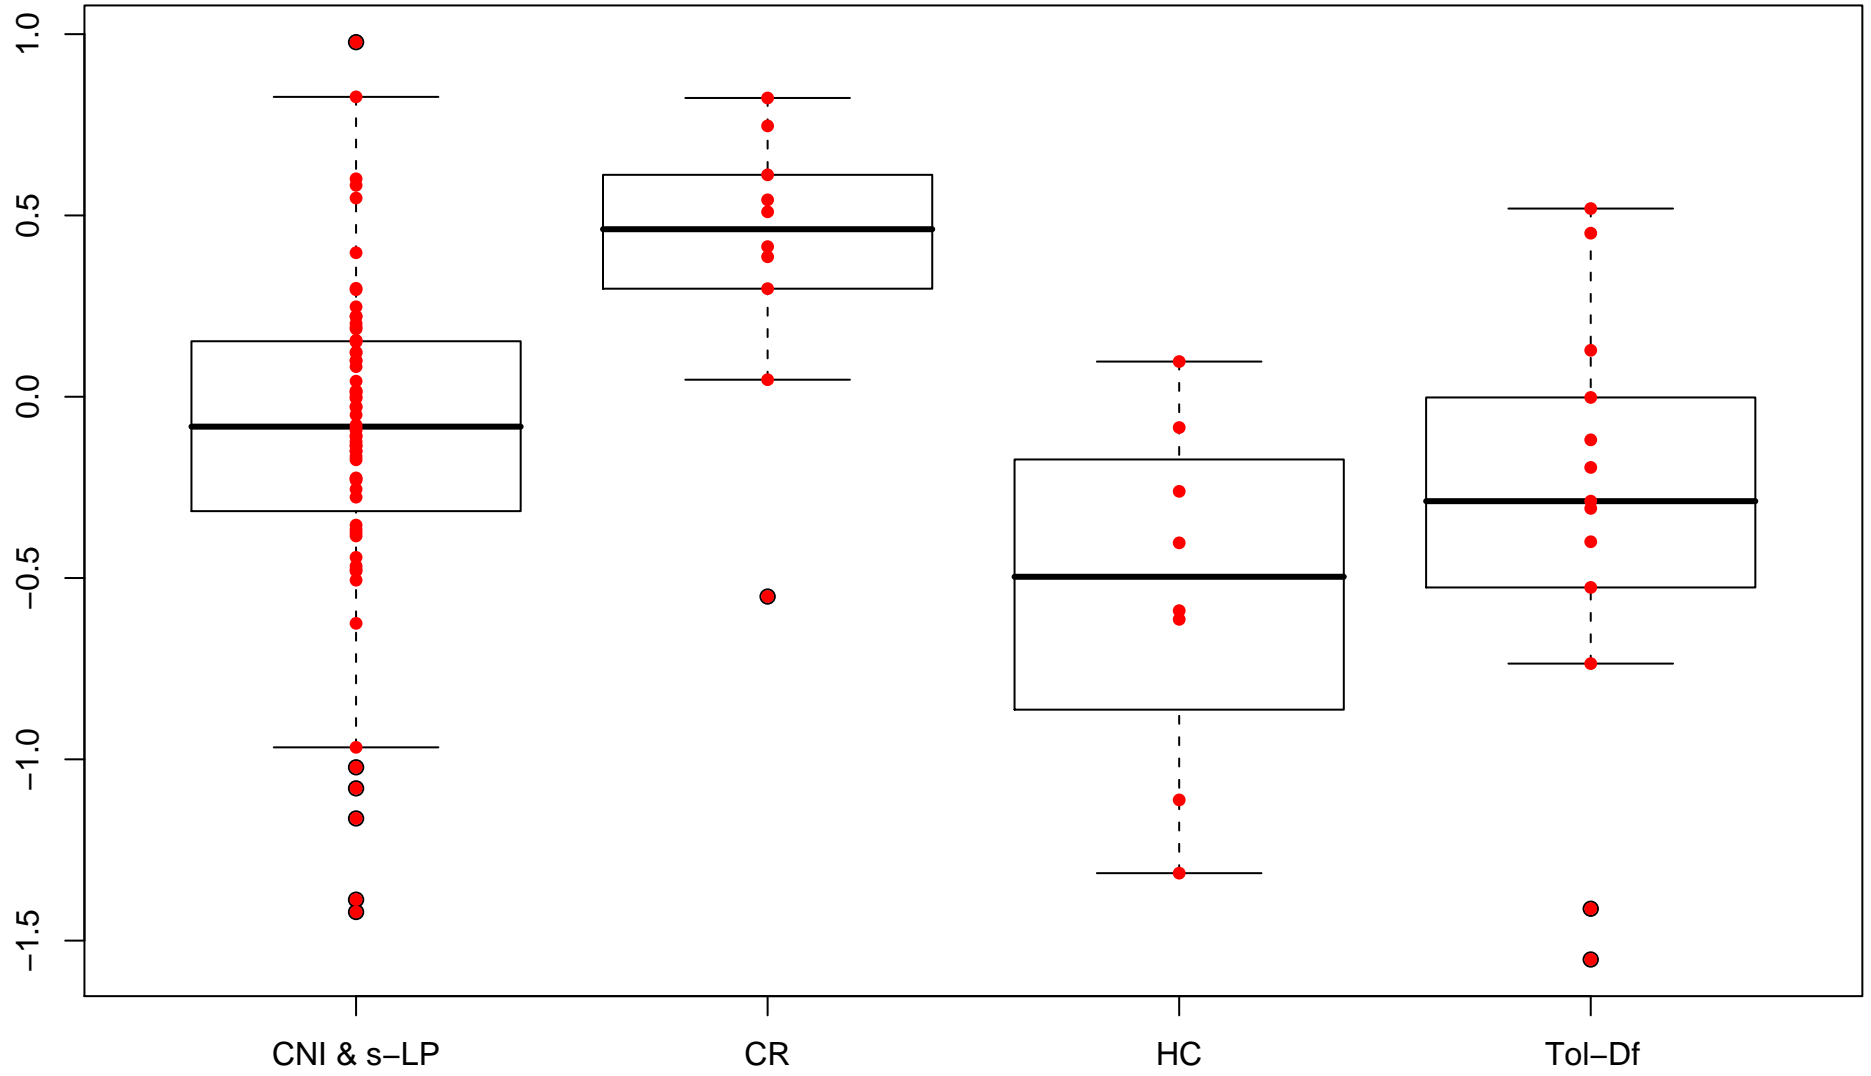

Rank 158 : RFC4  
0.0004052

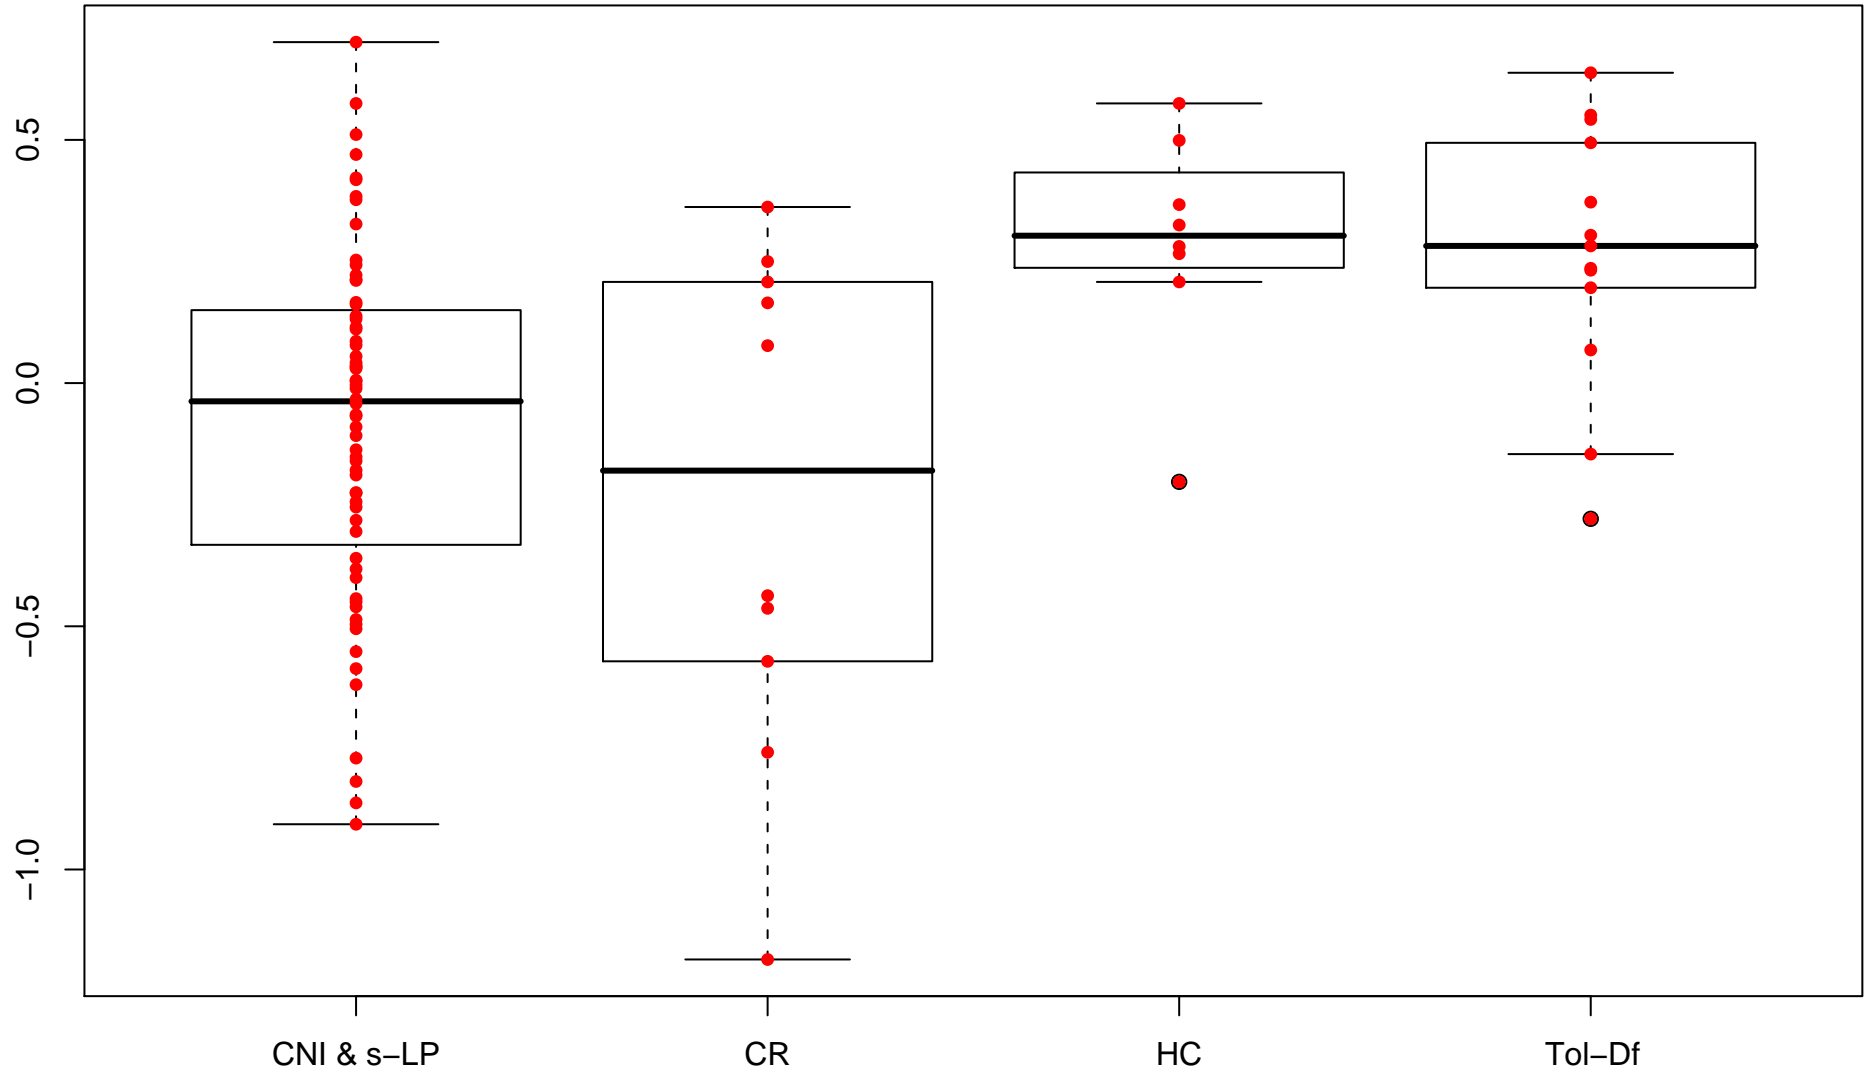

Rank 159 : BTG1  
0.0004121

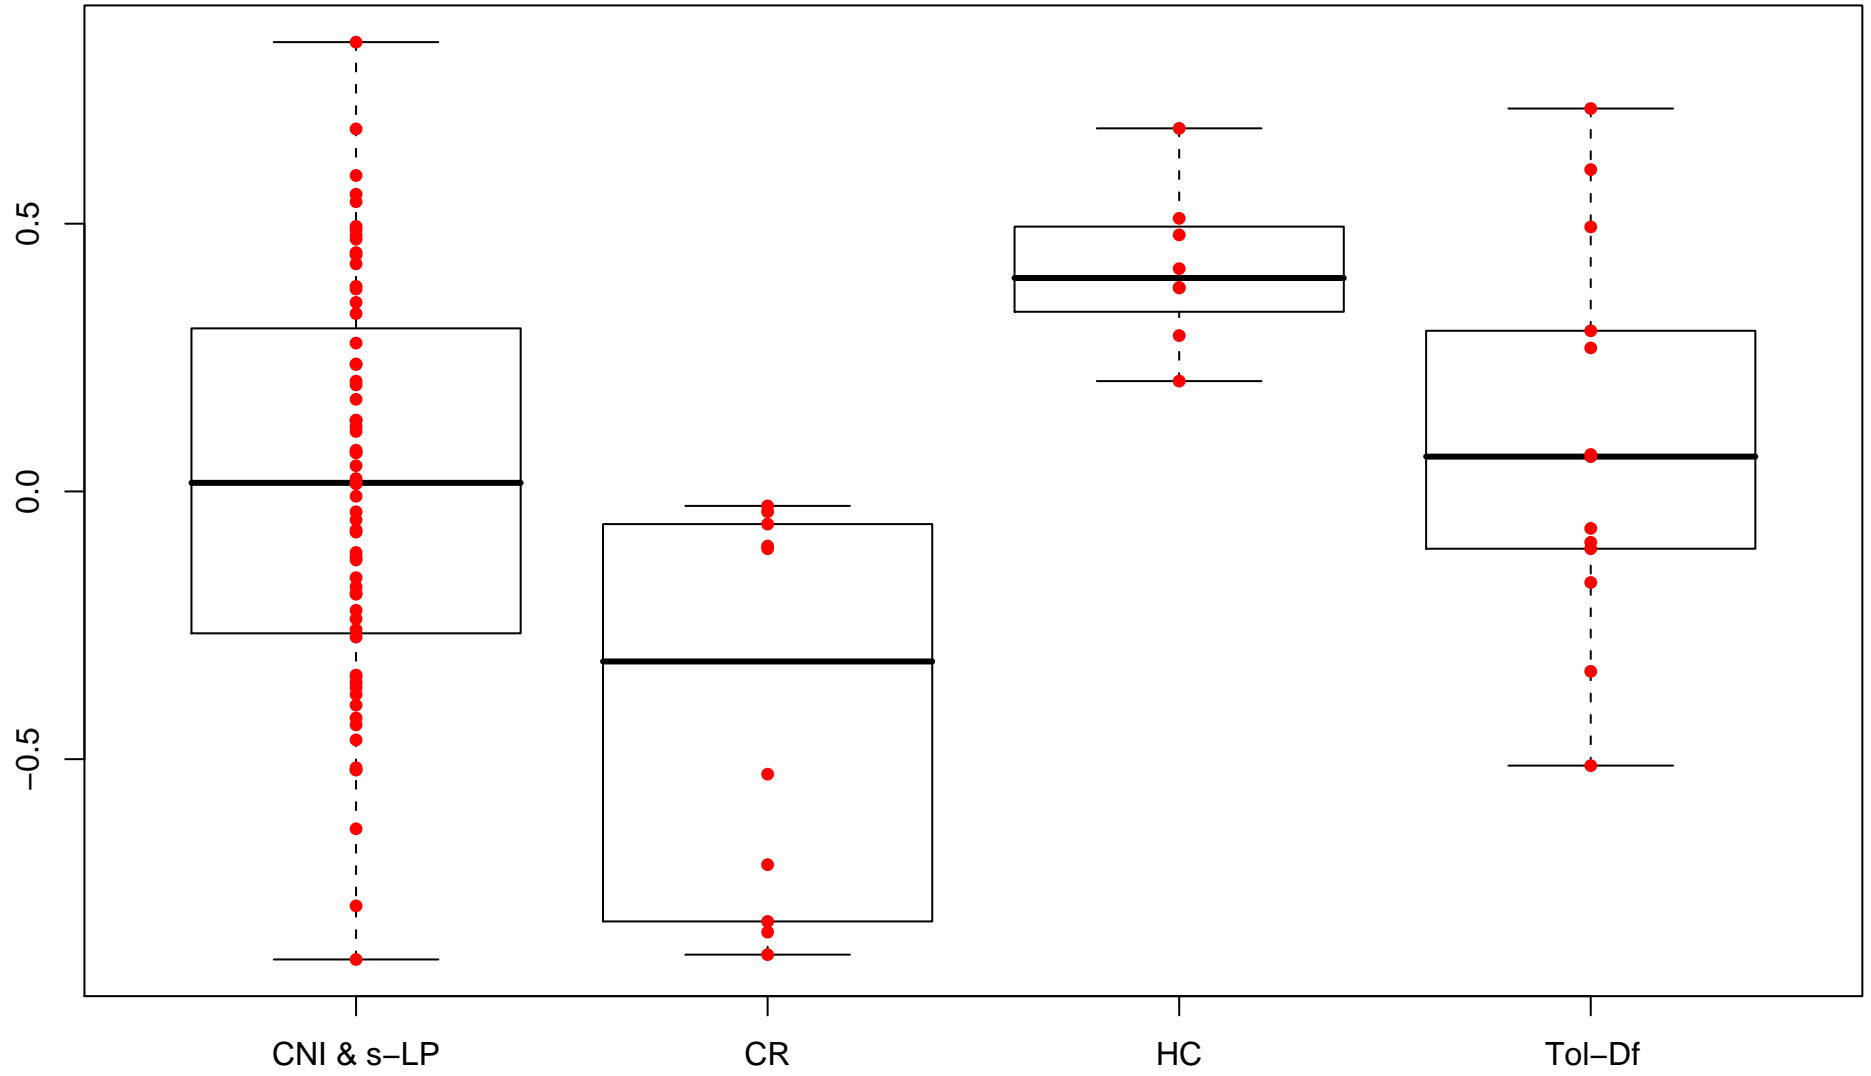

Rank 160 : SPON1  
0.0004152

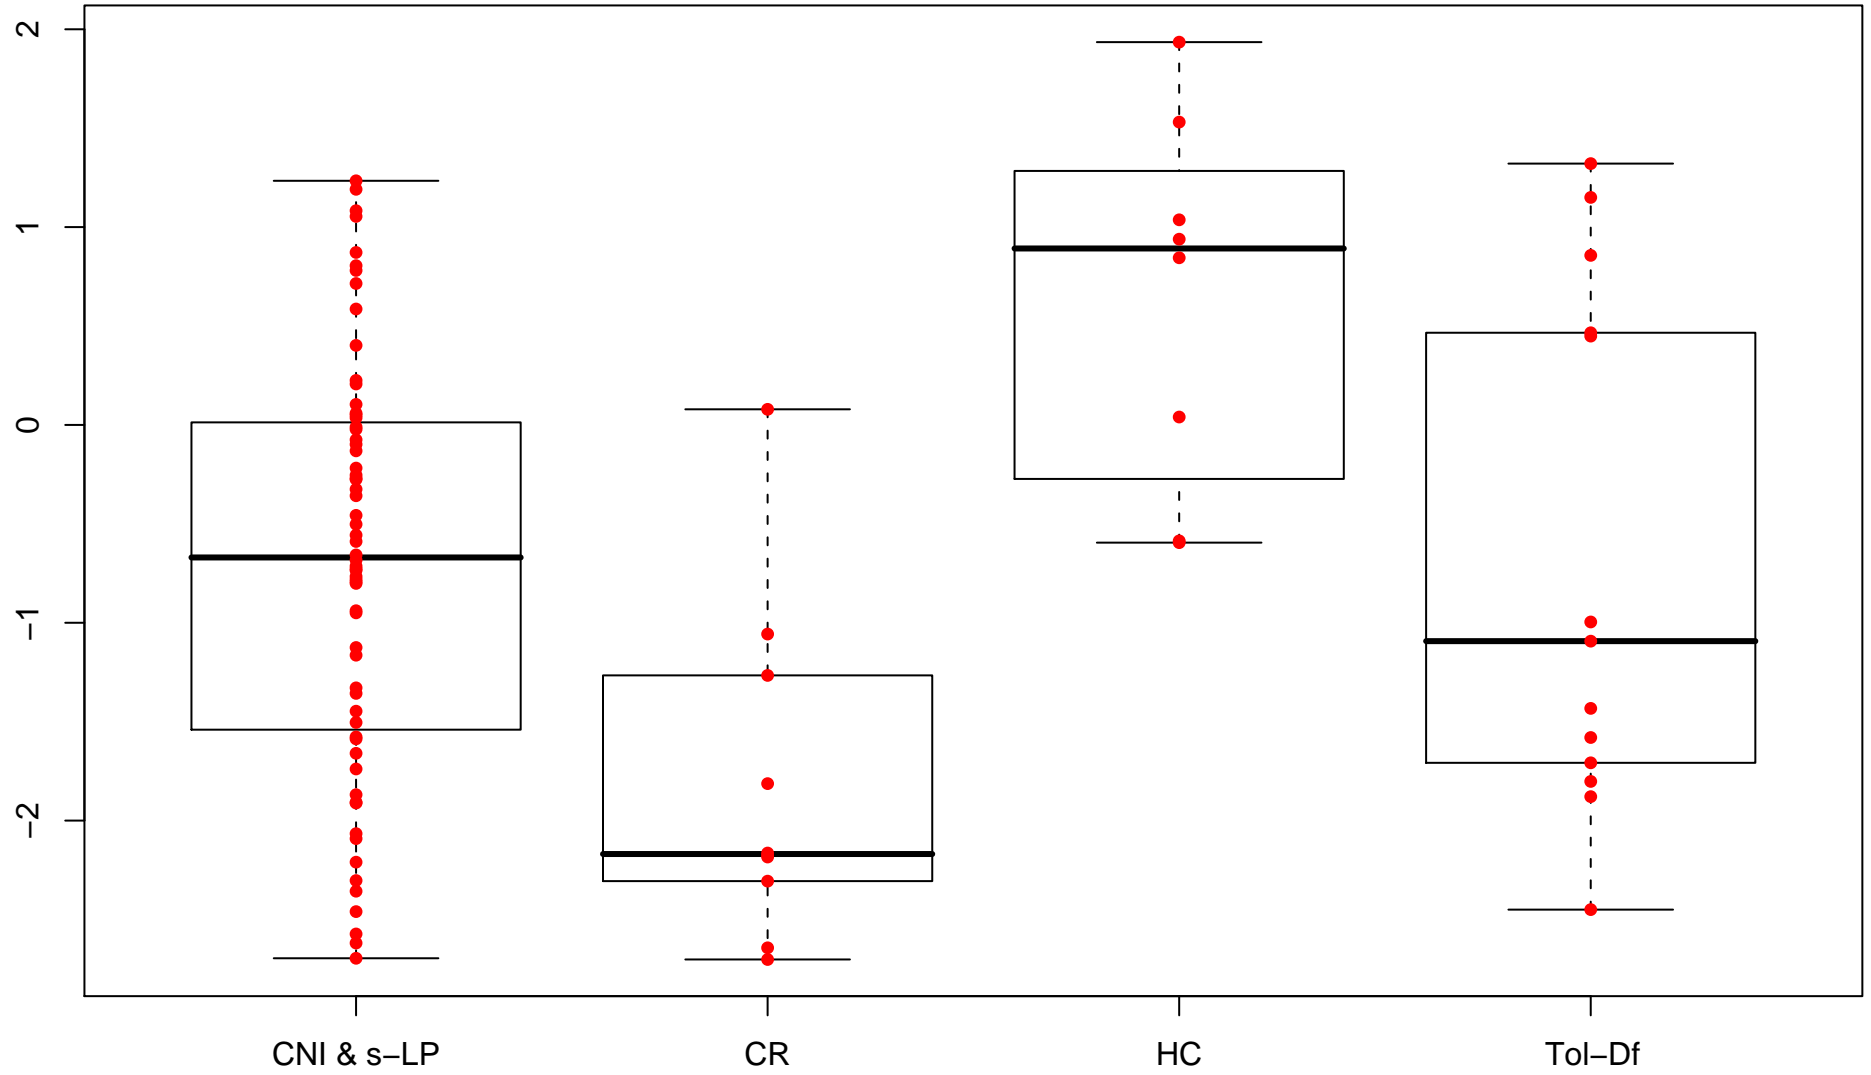

Rank 161 : KCNJ15  
0.0004167

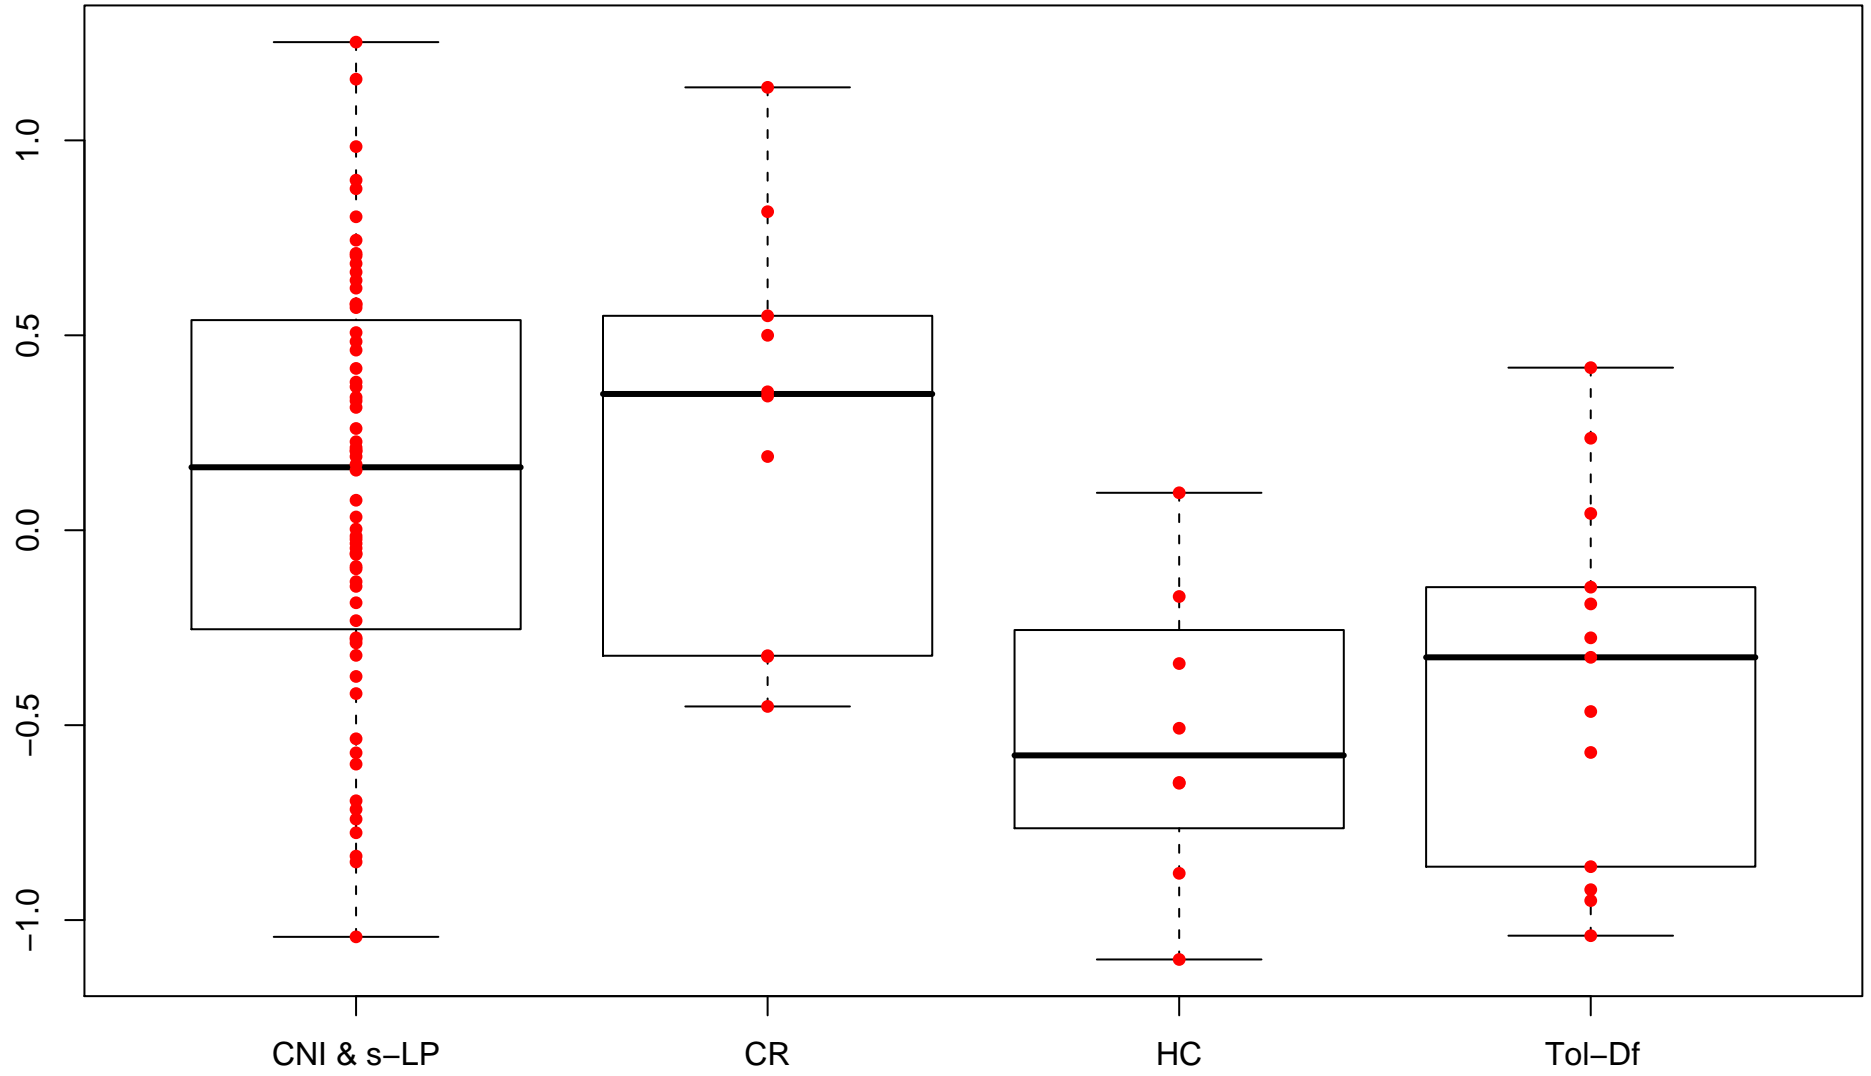

Rank 162 : ATL3  
0.0004178

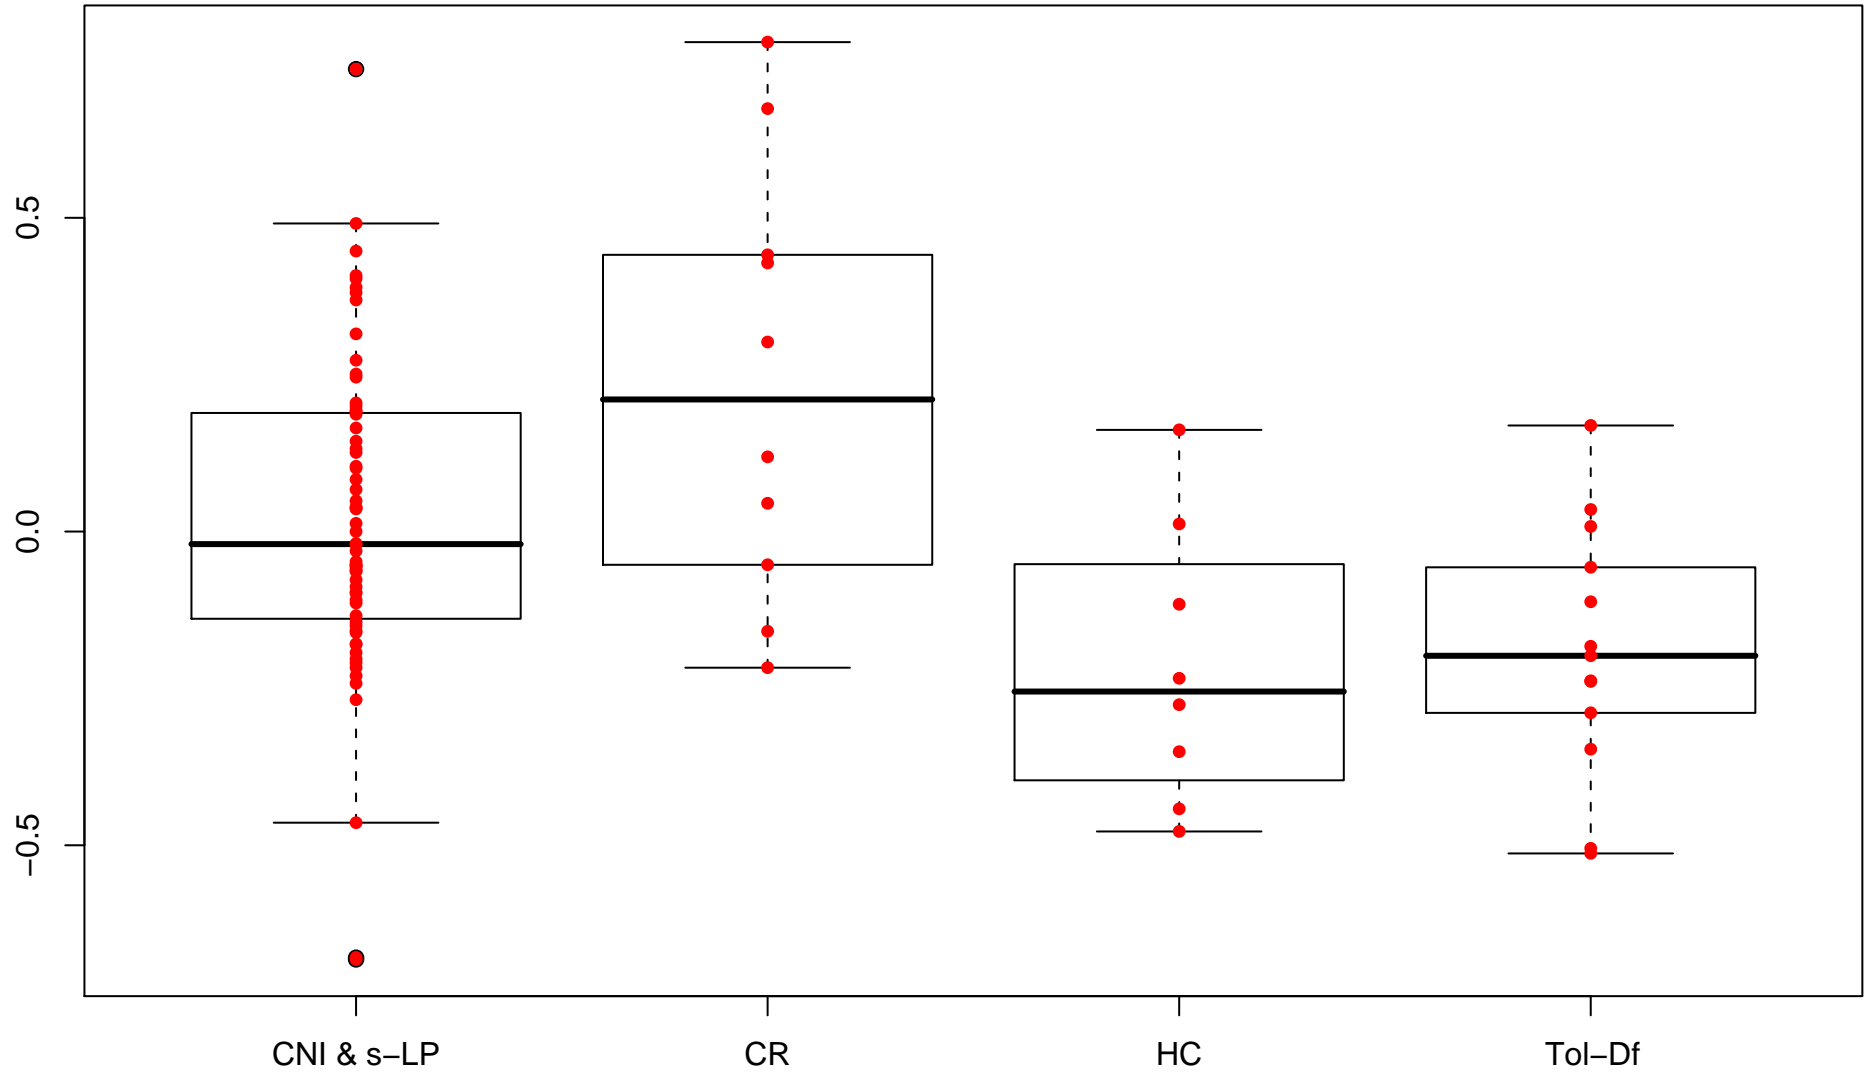



Rank 163 : APH1B  
0.0004193

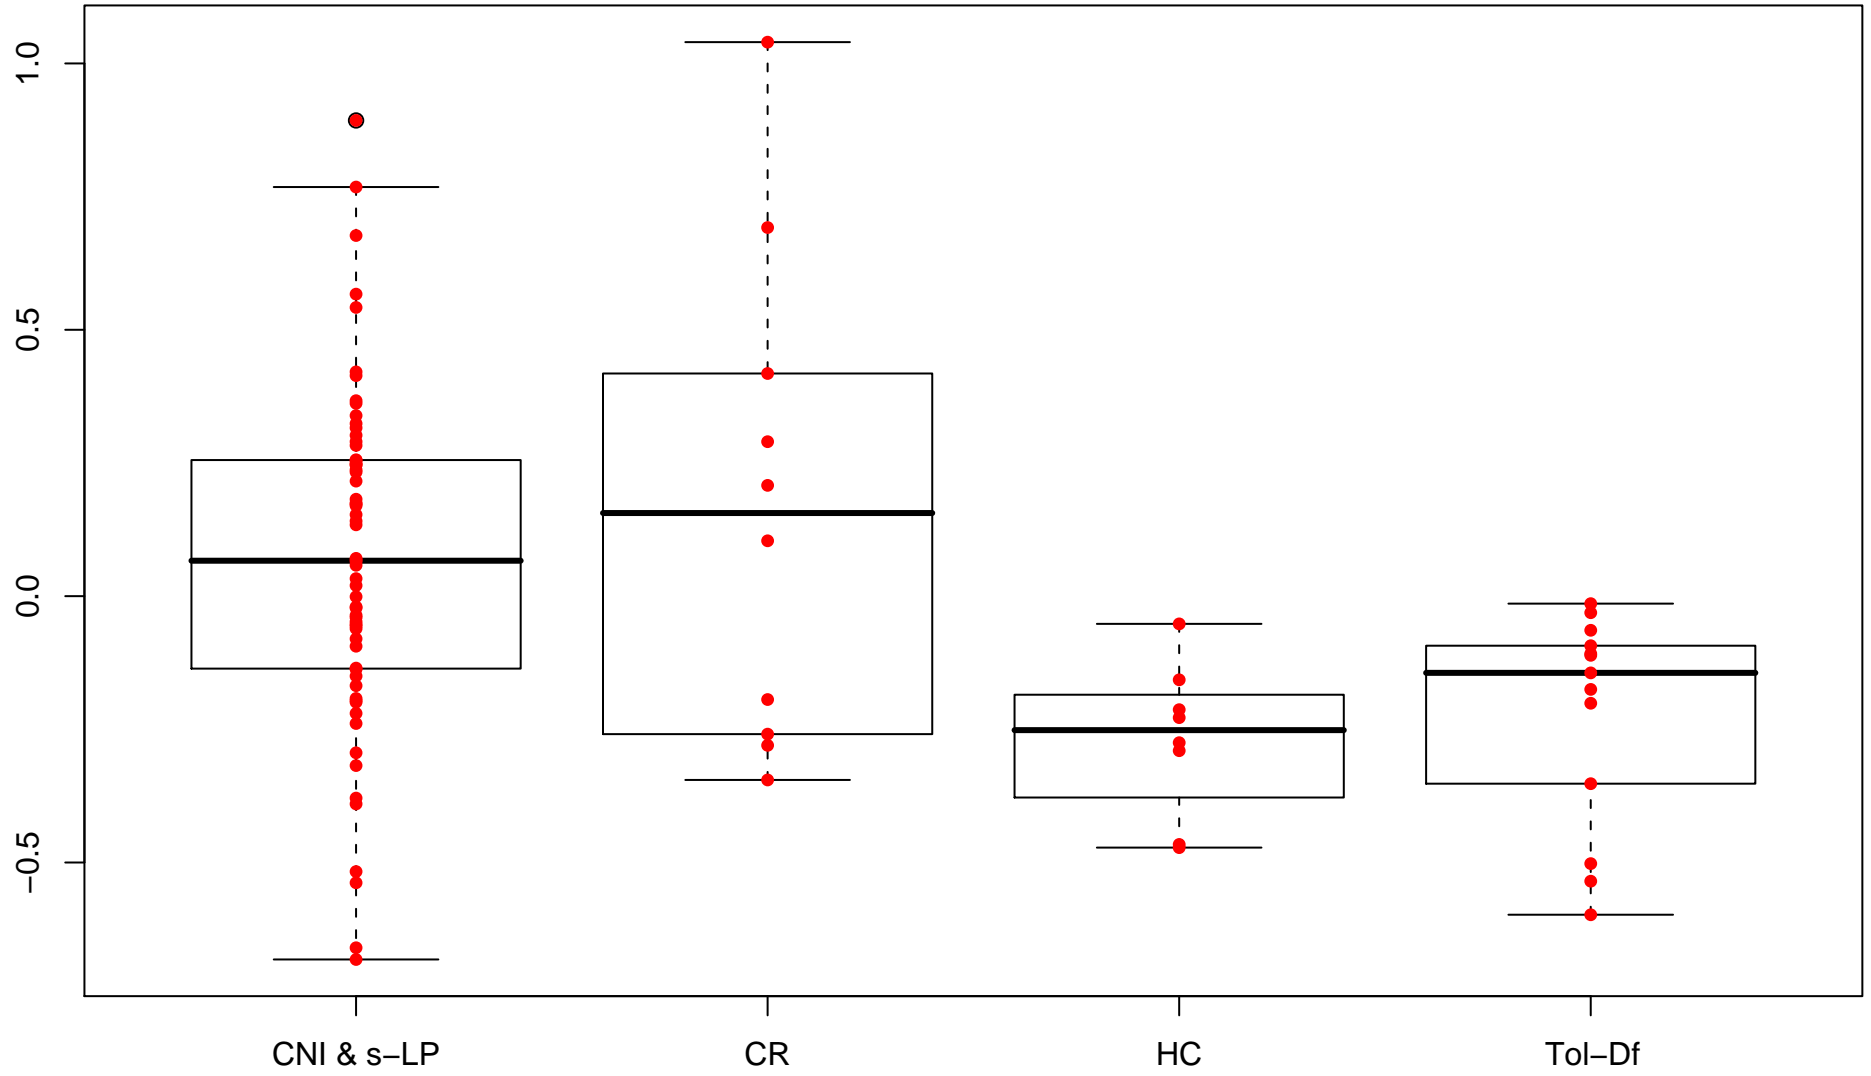

Rank 164 : LRRC18  
0.0004194

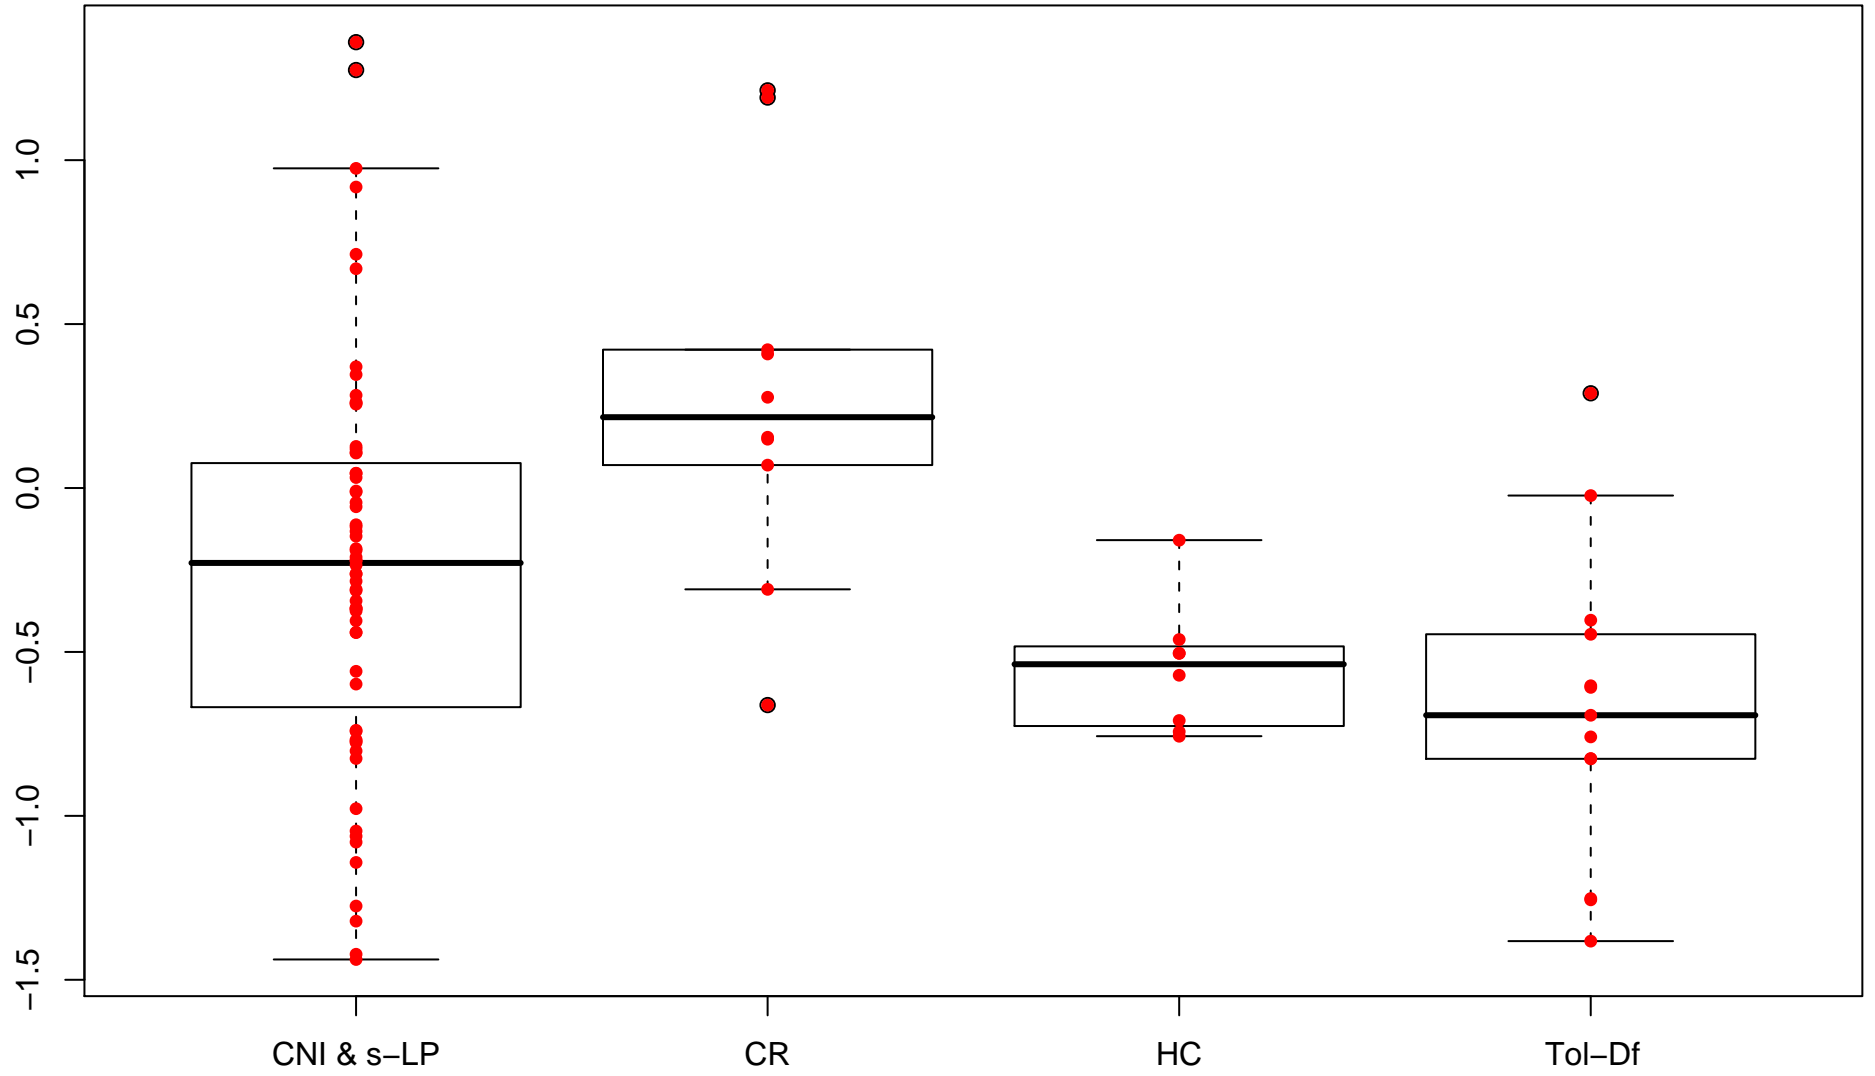

Rank 165 : AFF3  
0.0004247

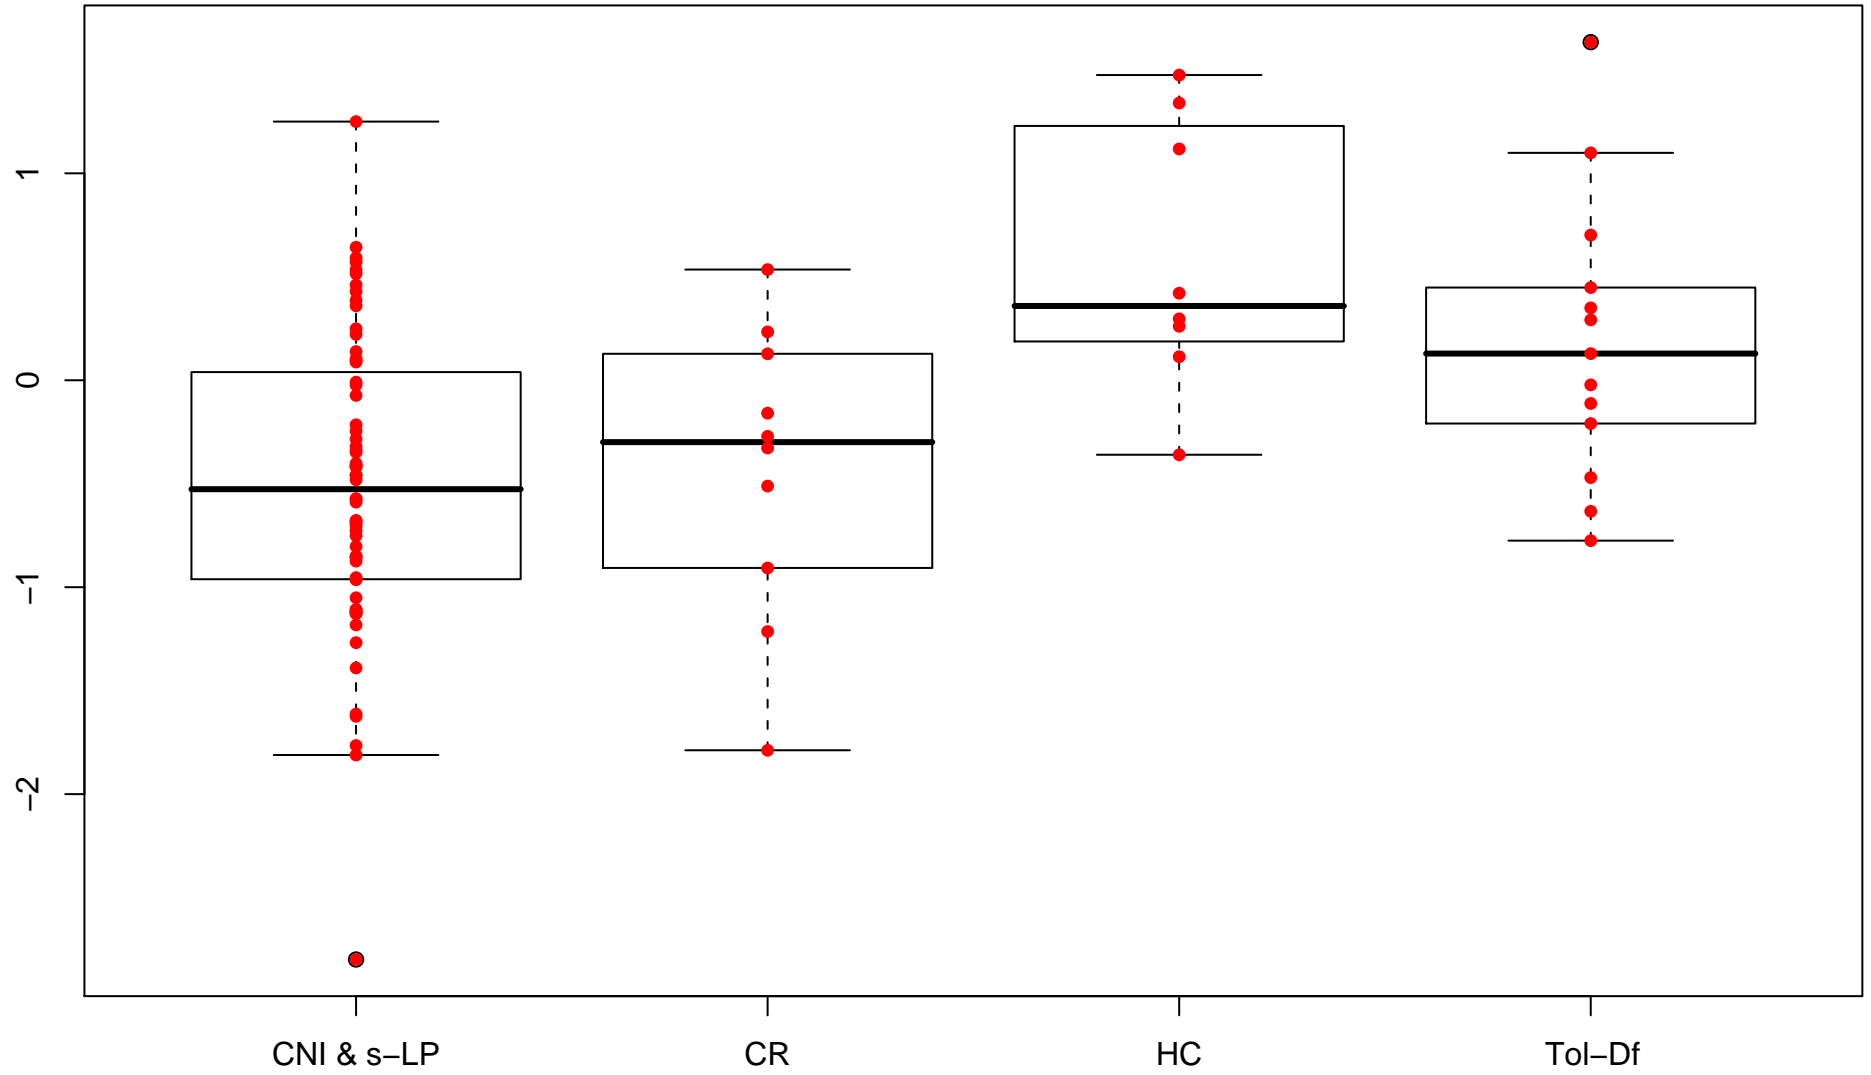

Rank 166 : MCEE  
0.0004256

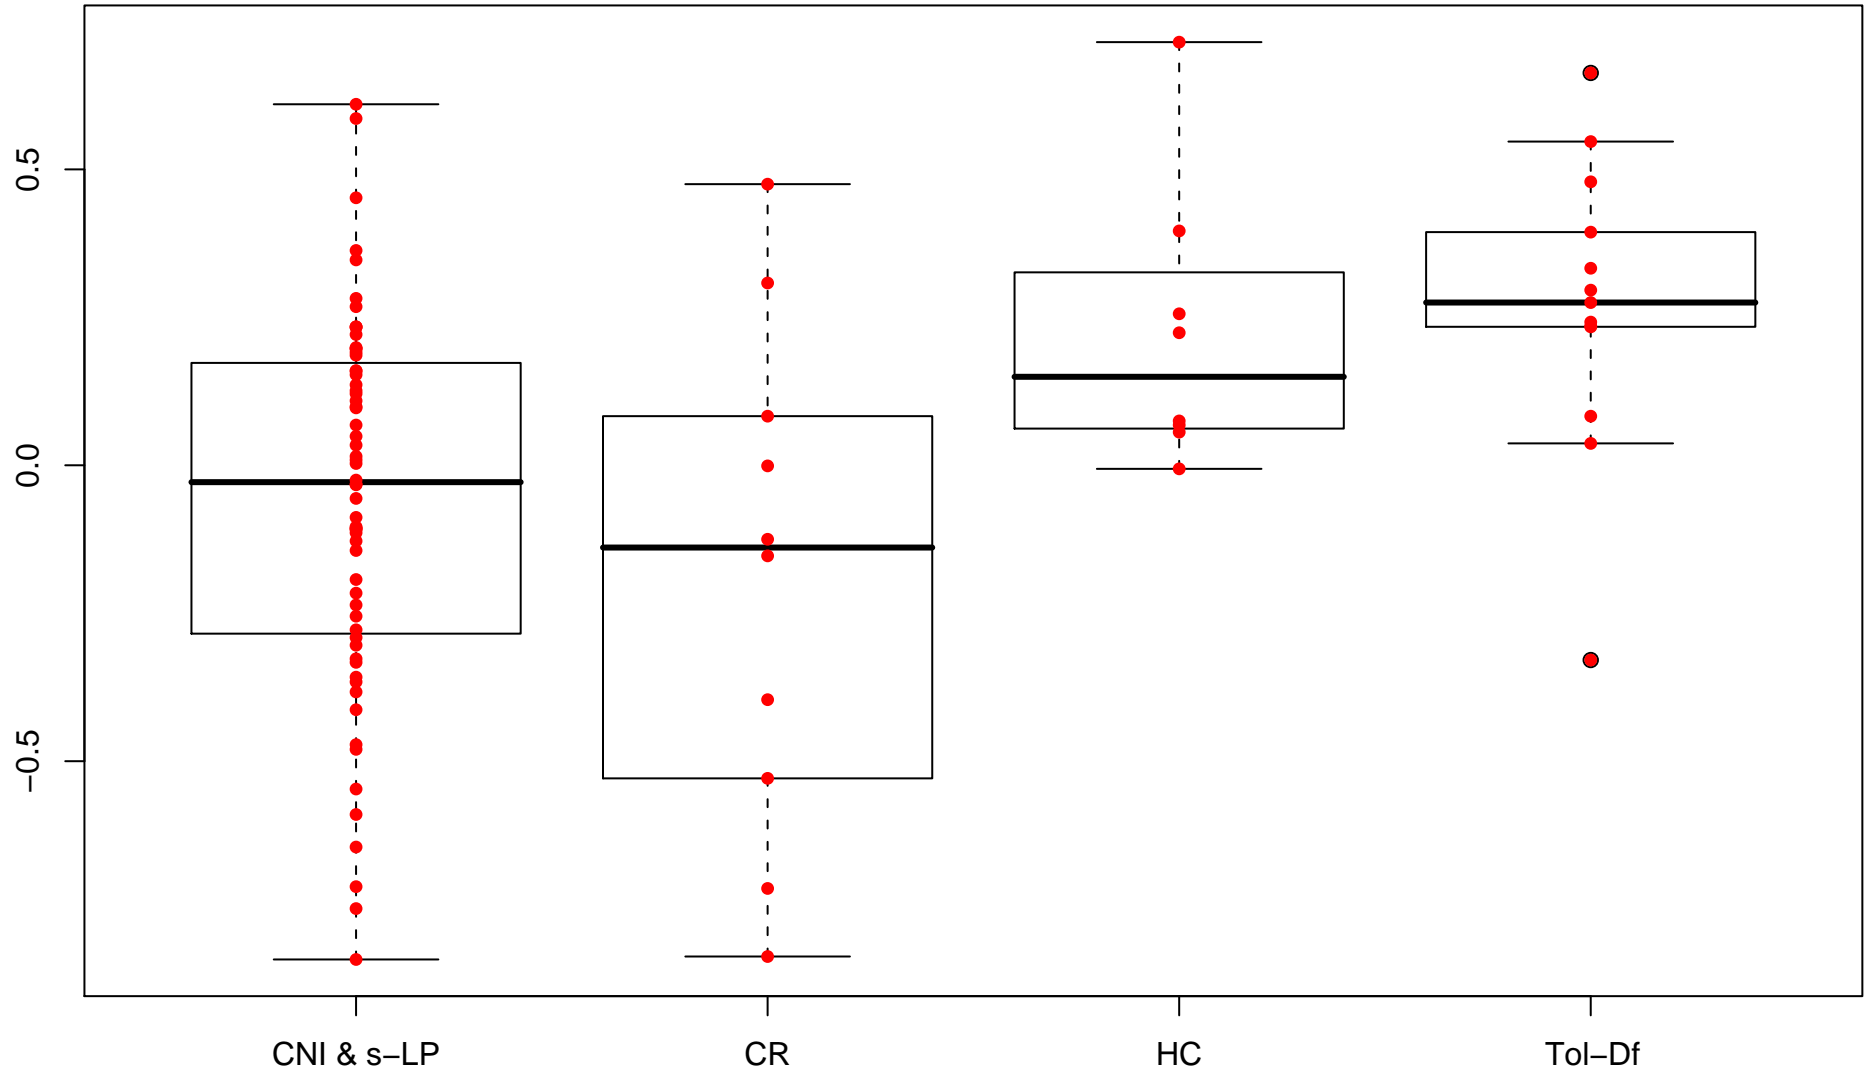

Rank 167 : NLRC4  
0.0004287

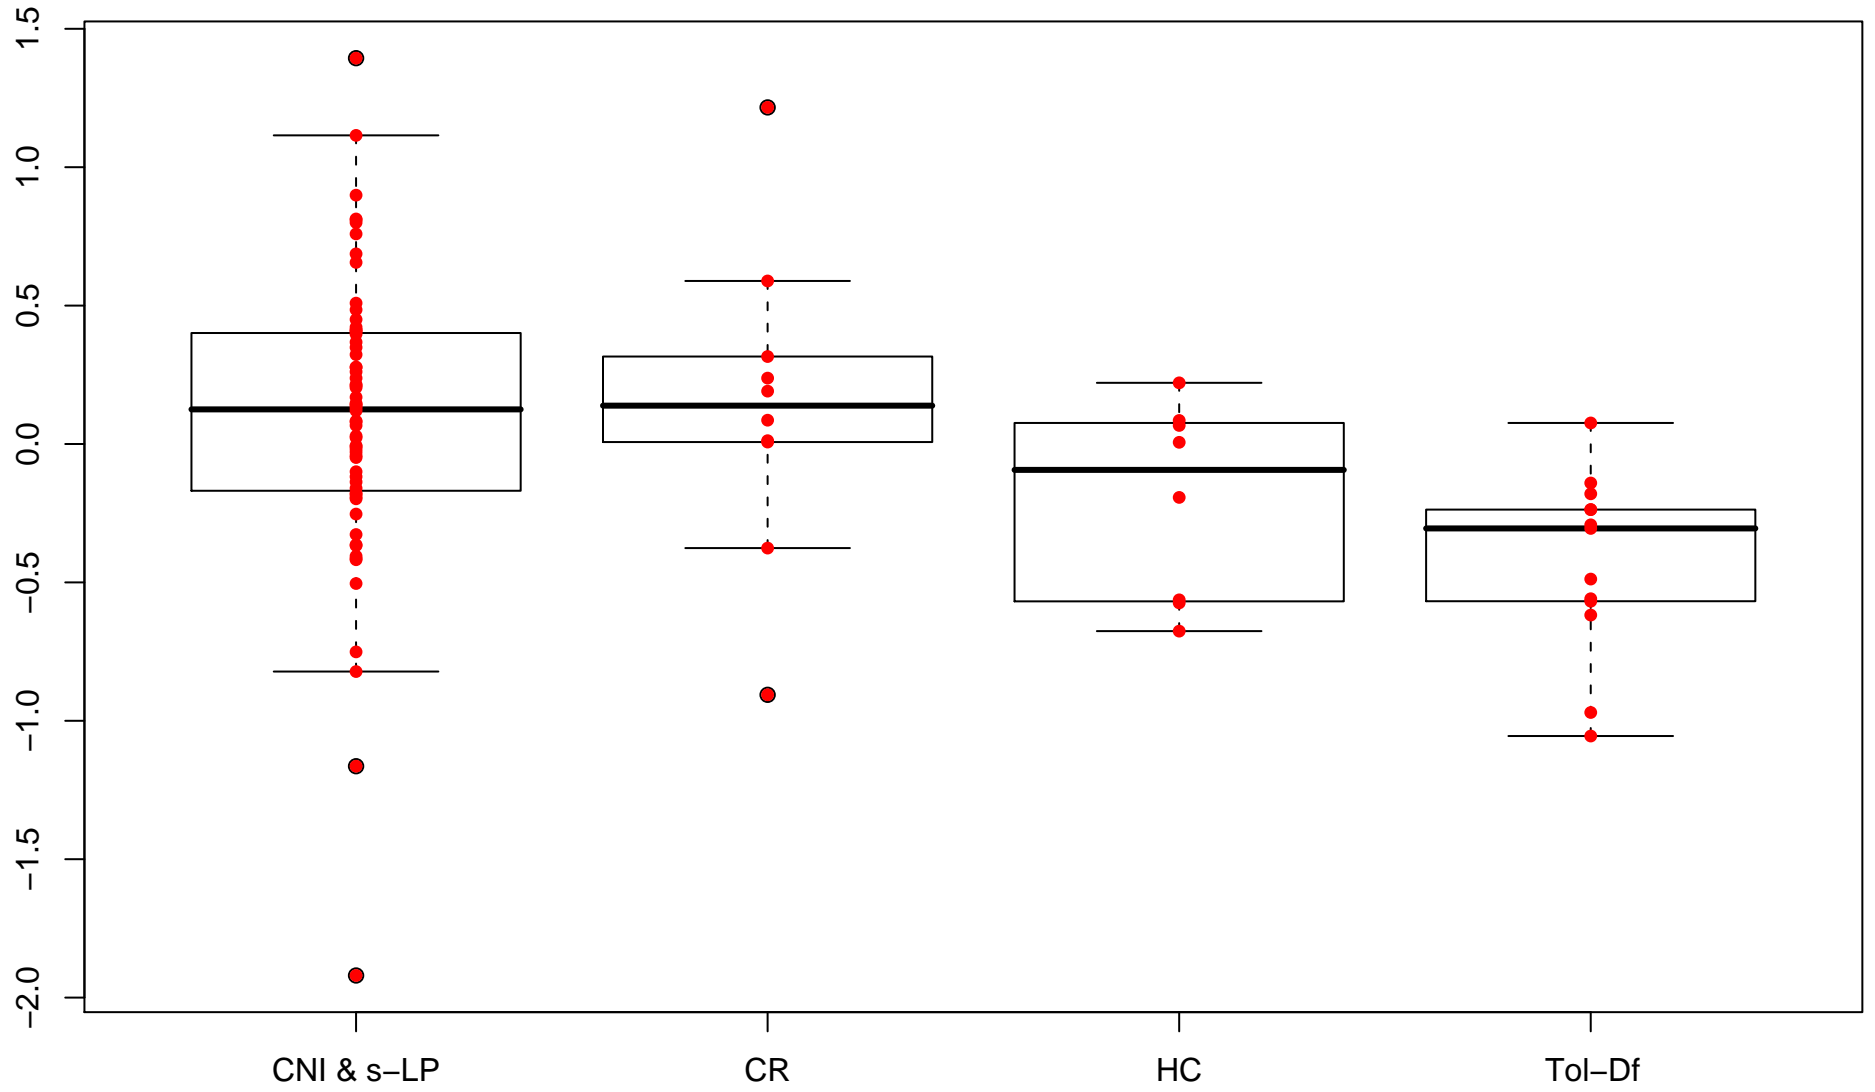

Rank 168 : PLA1A  
0.0004346

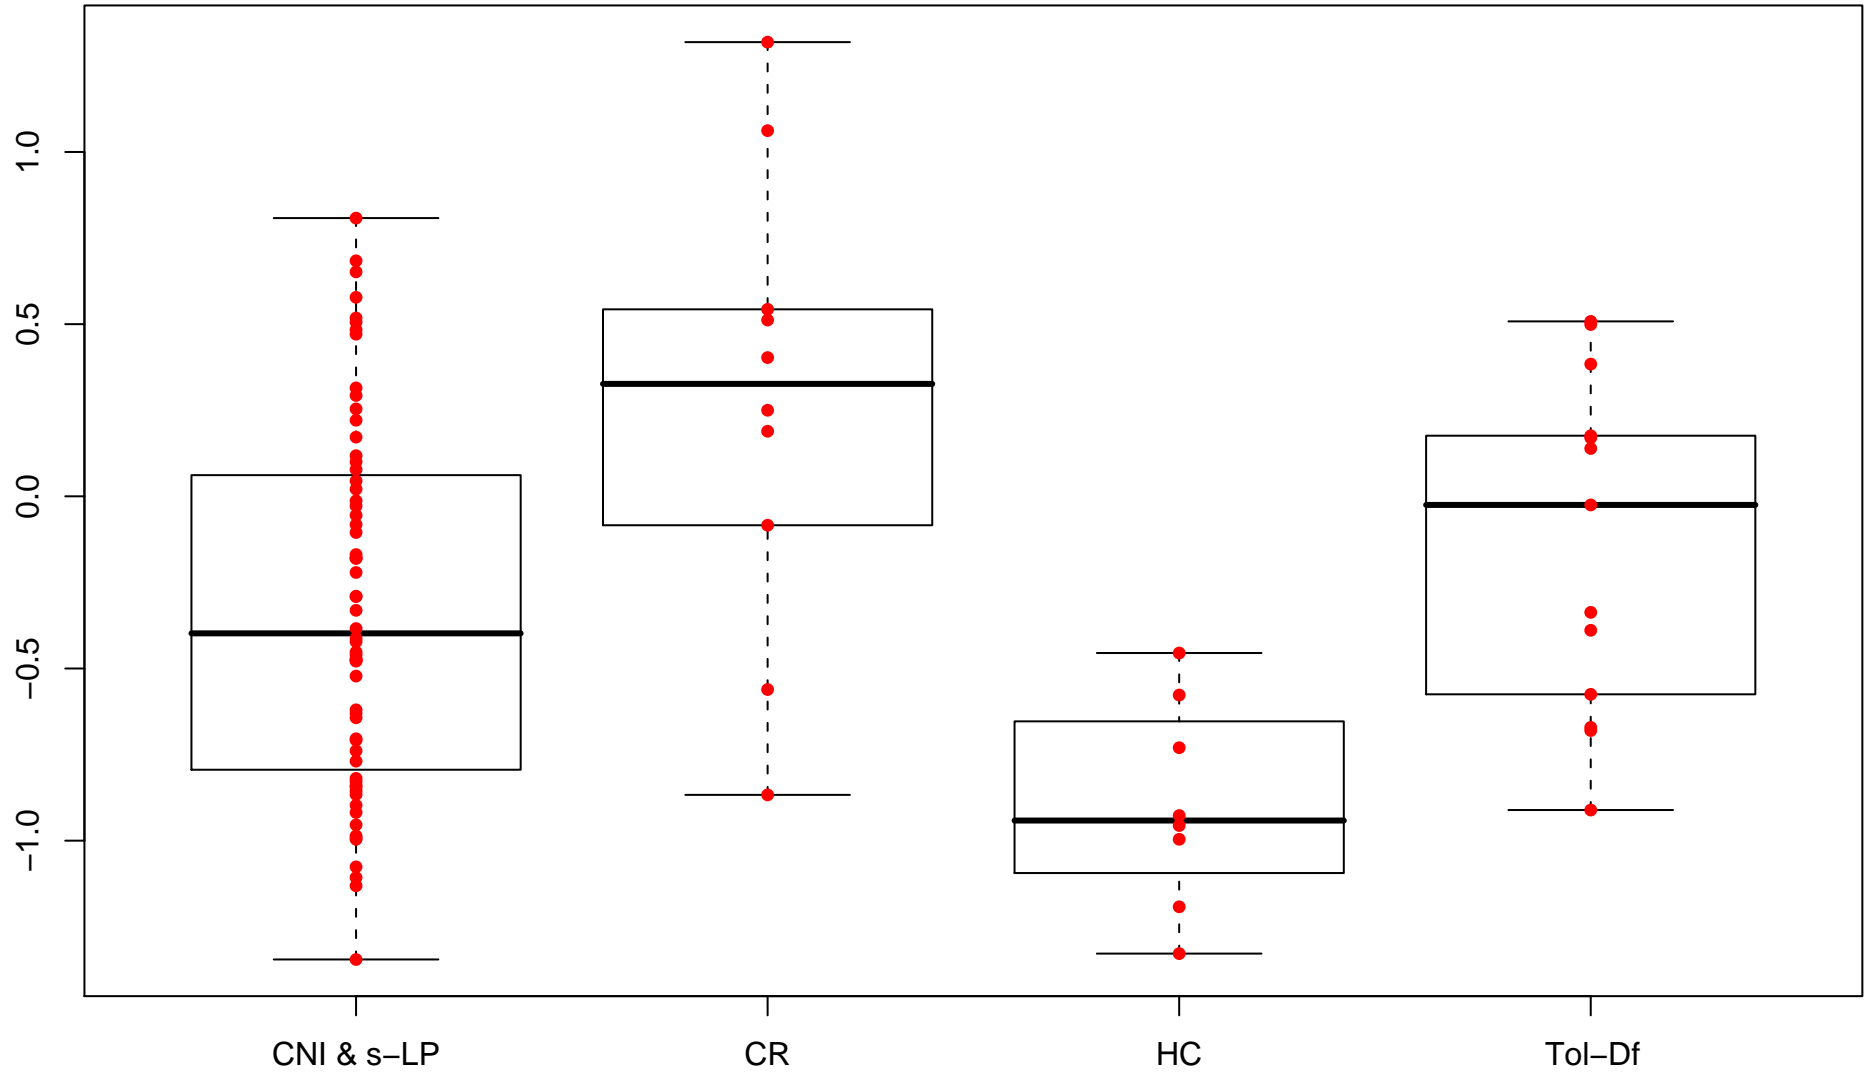

Rank 169 : DTX1  
0.0004395

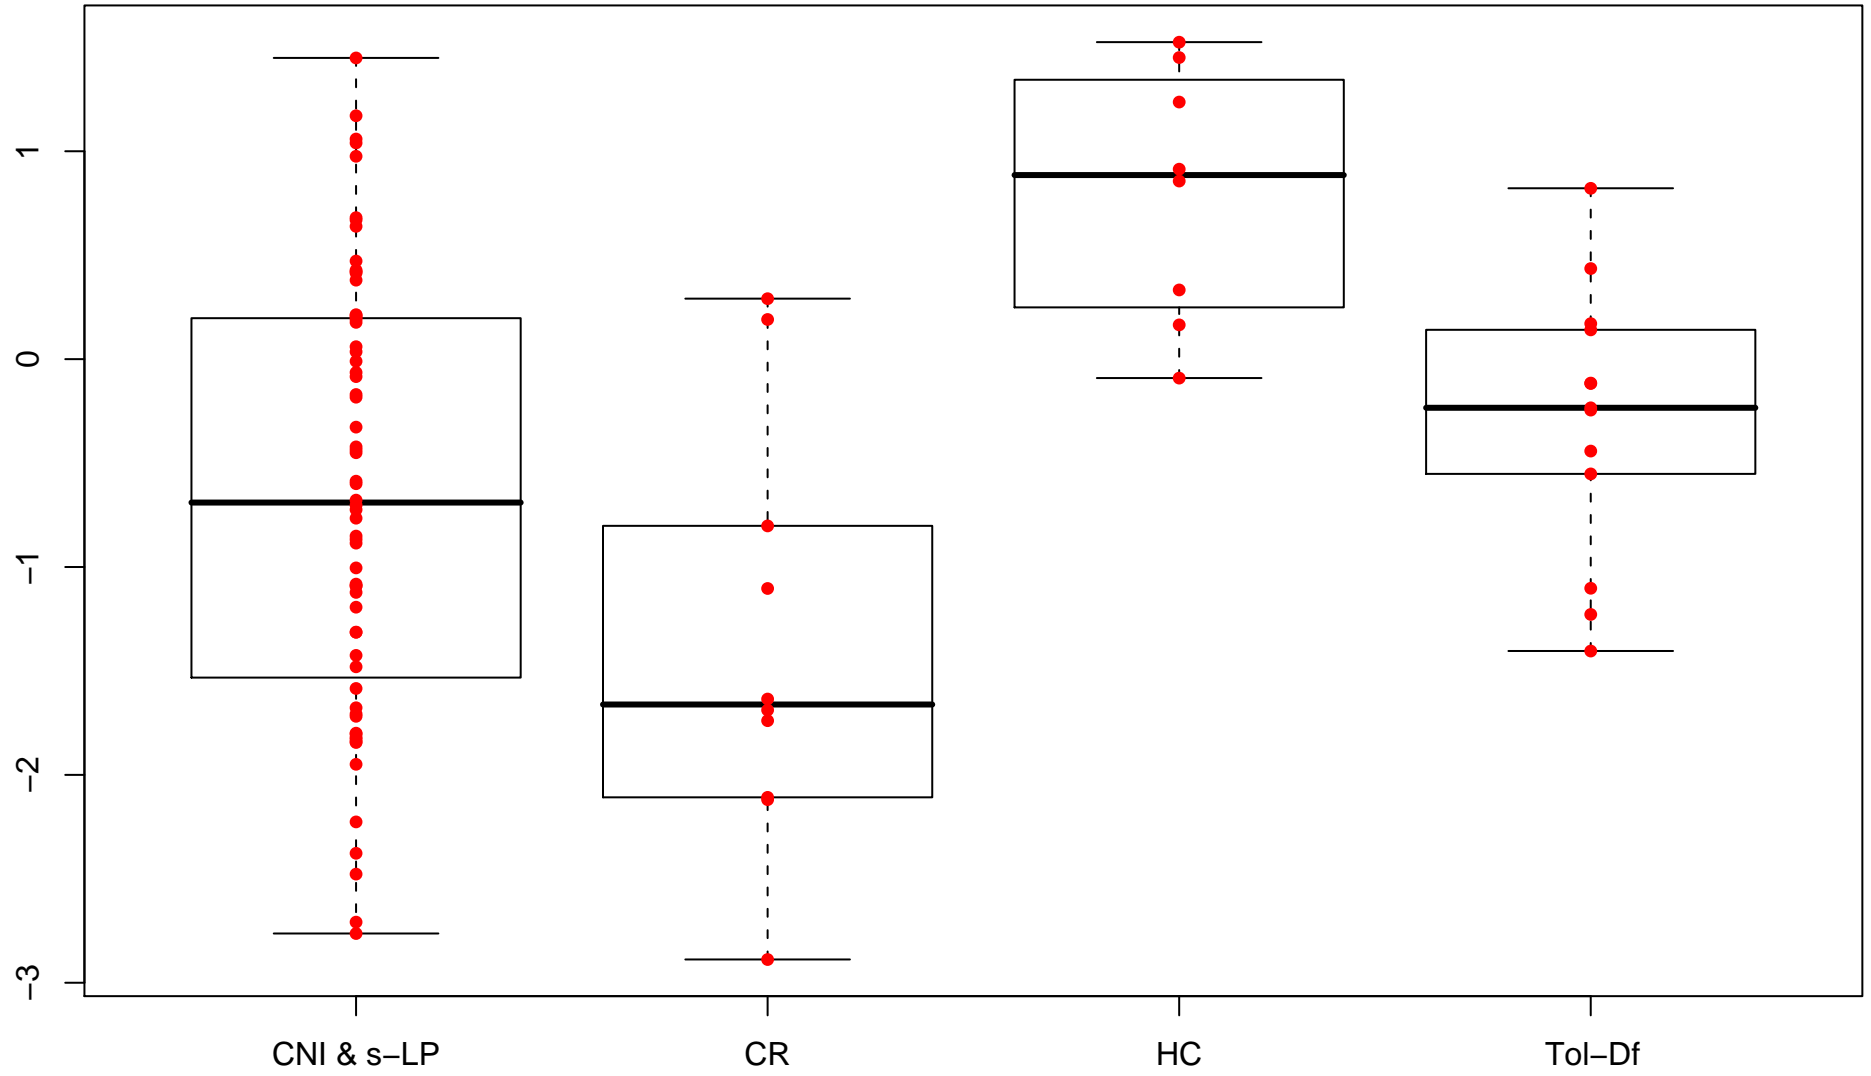

Rank 170 : TRIM4  
0.0004396

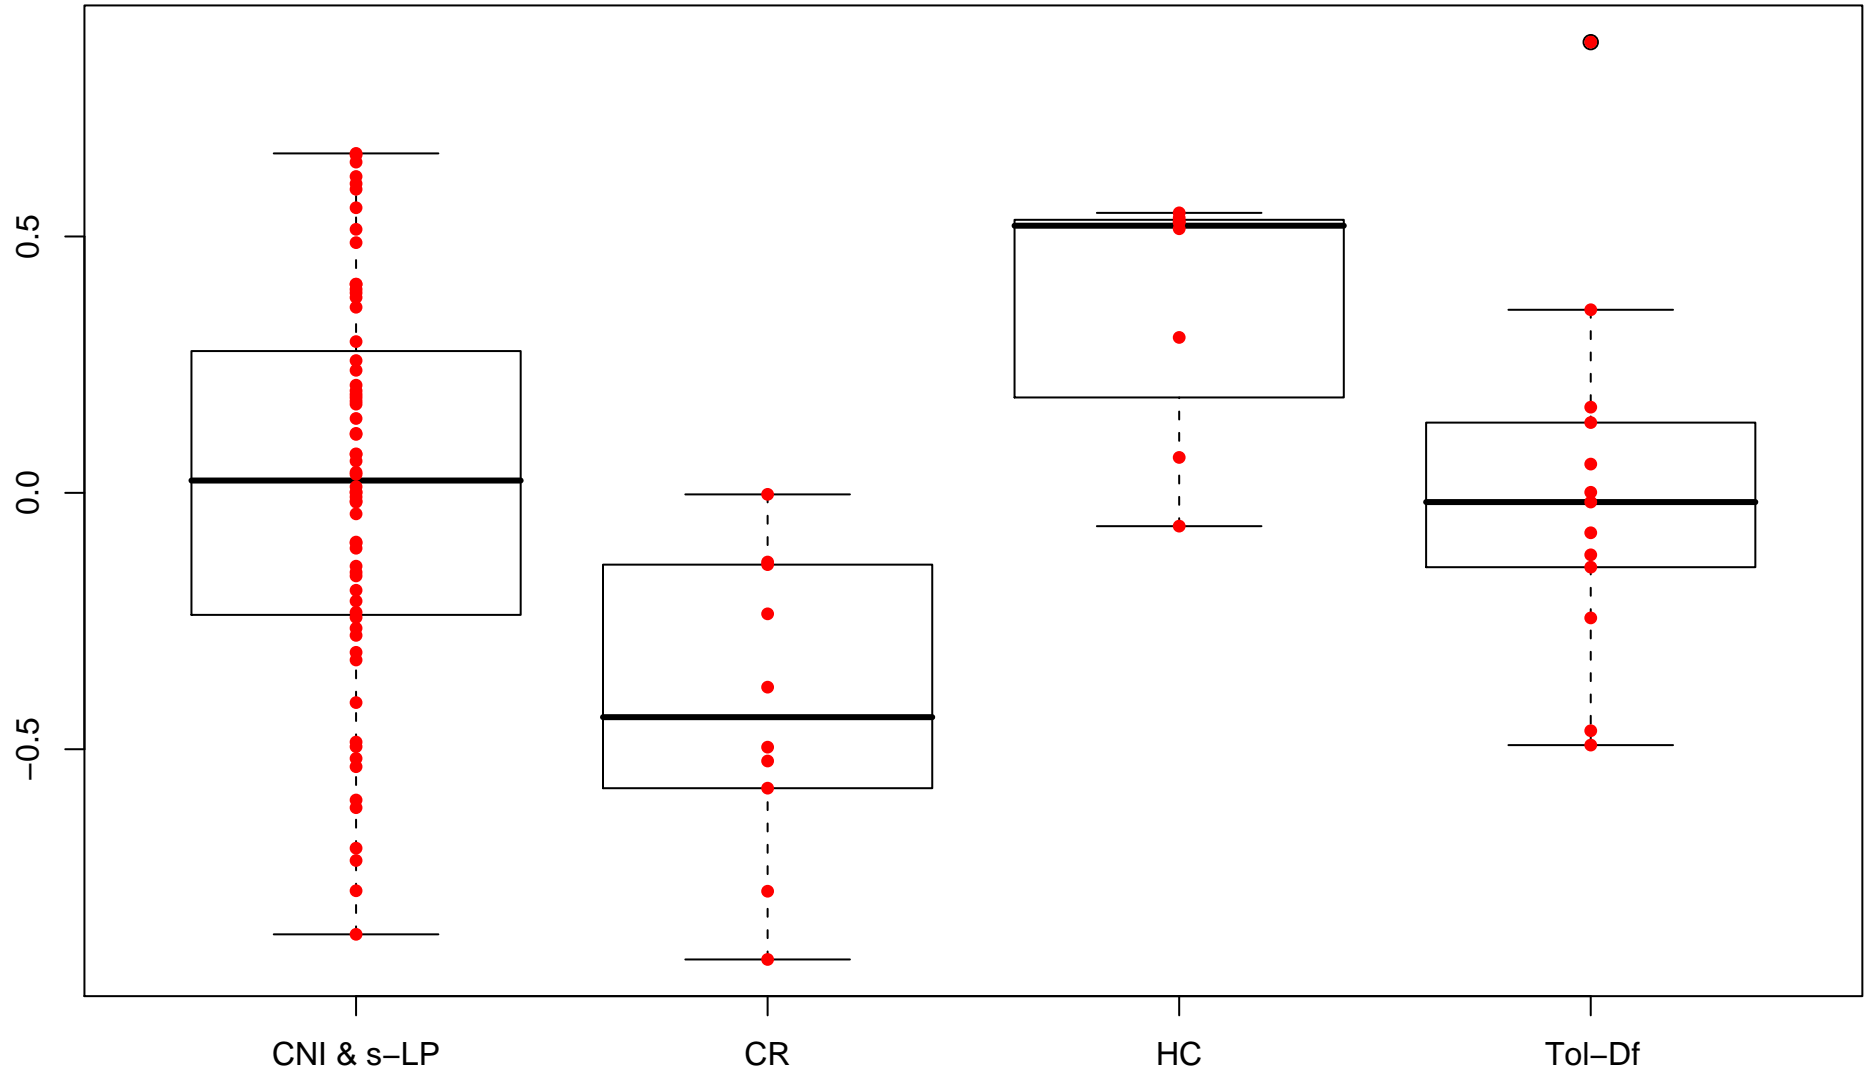



Rank 171 : TMEM106B  
0.0004506

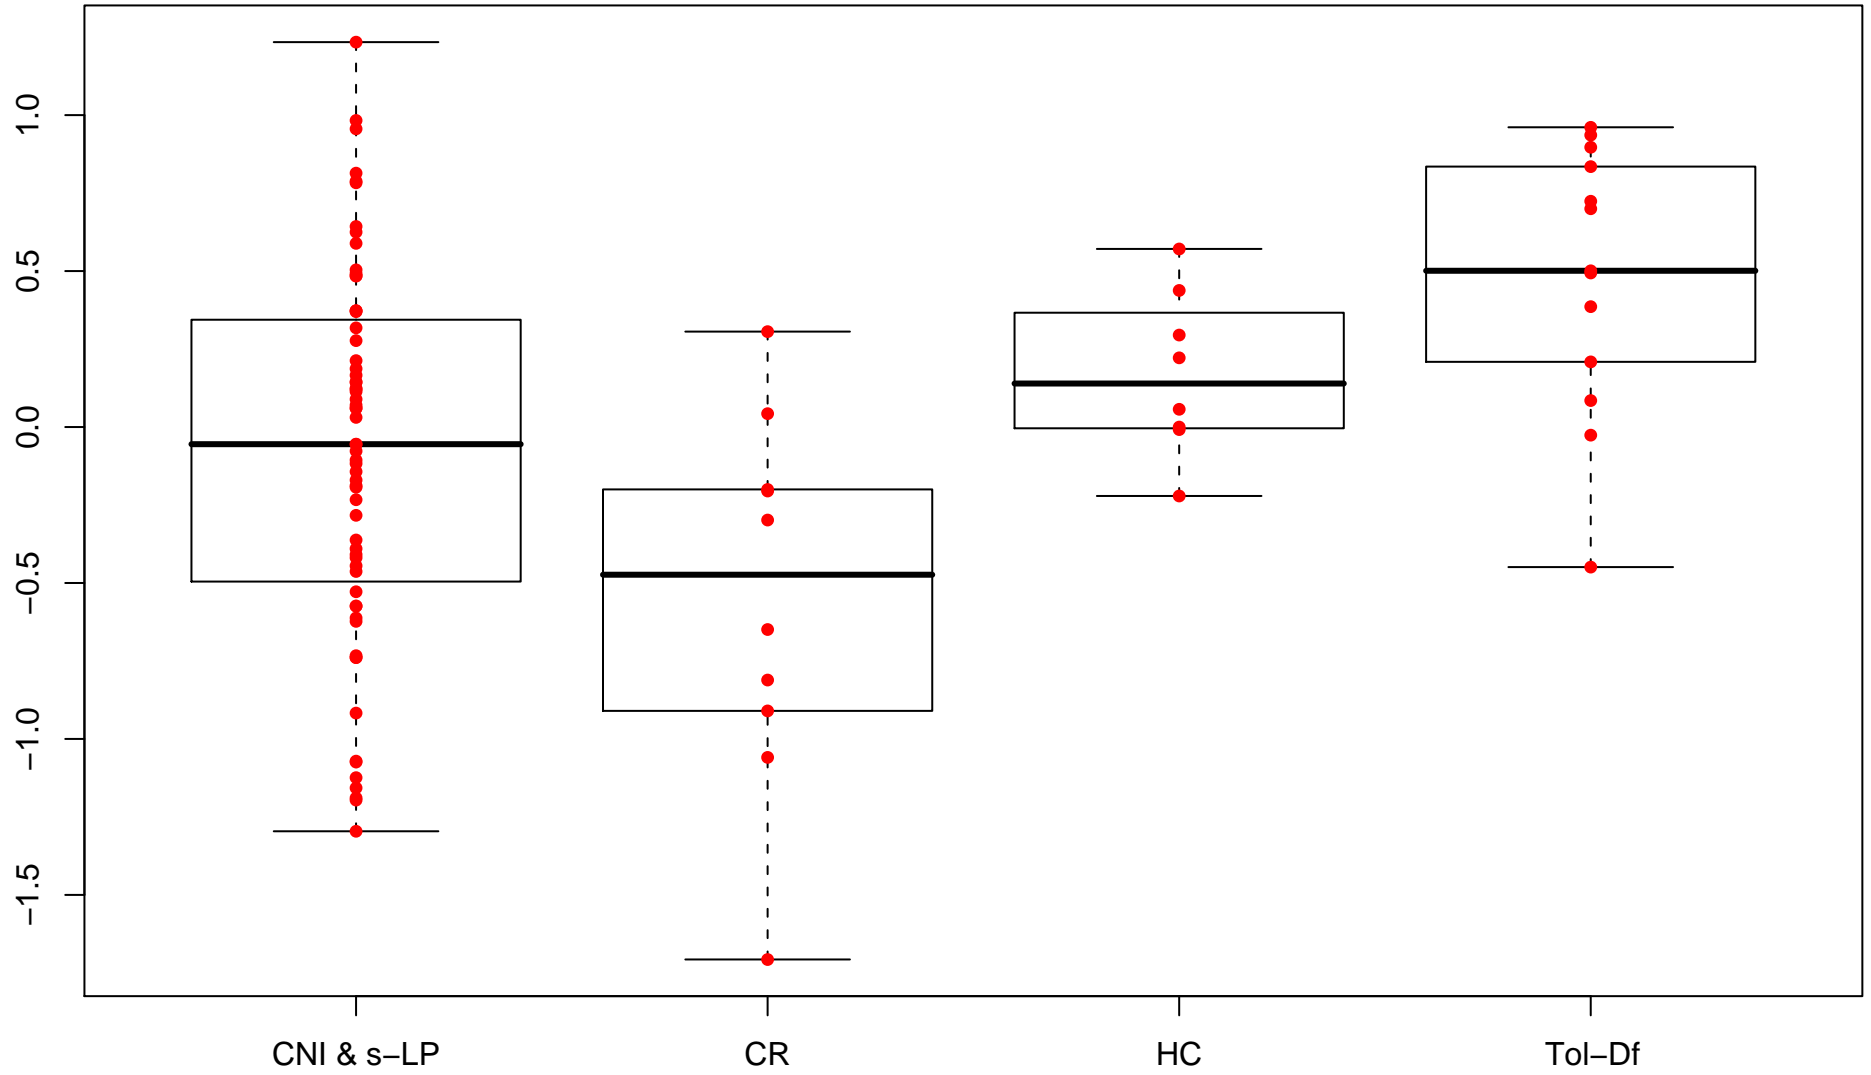

Rank 172 : CCNG1  
0.0004536

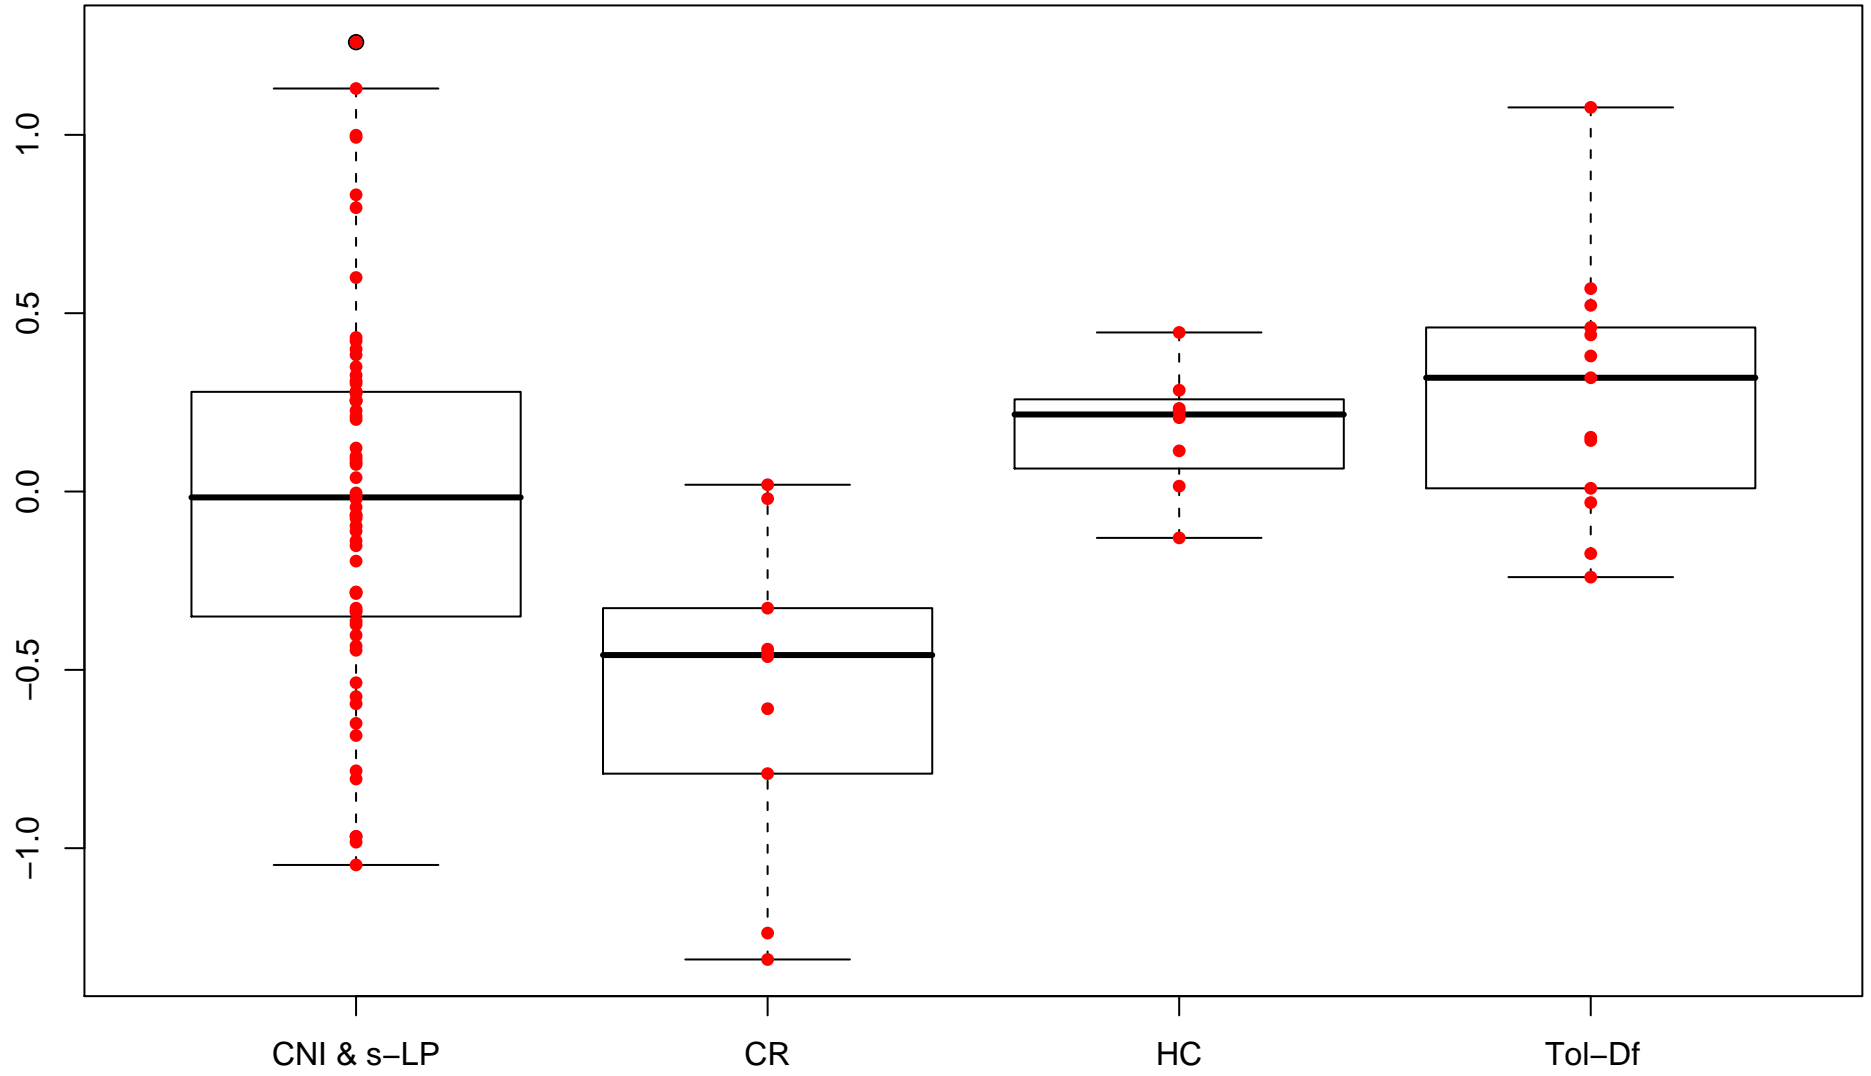

Rank 173 : HP  
0.0004649

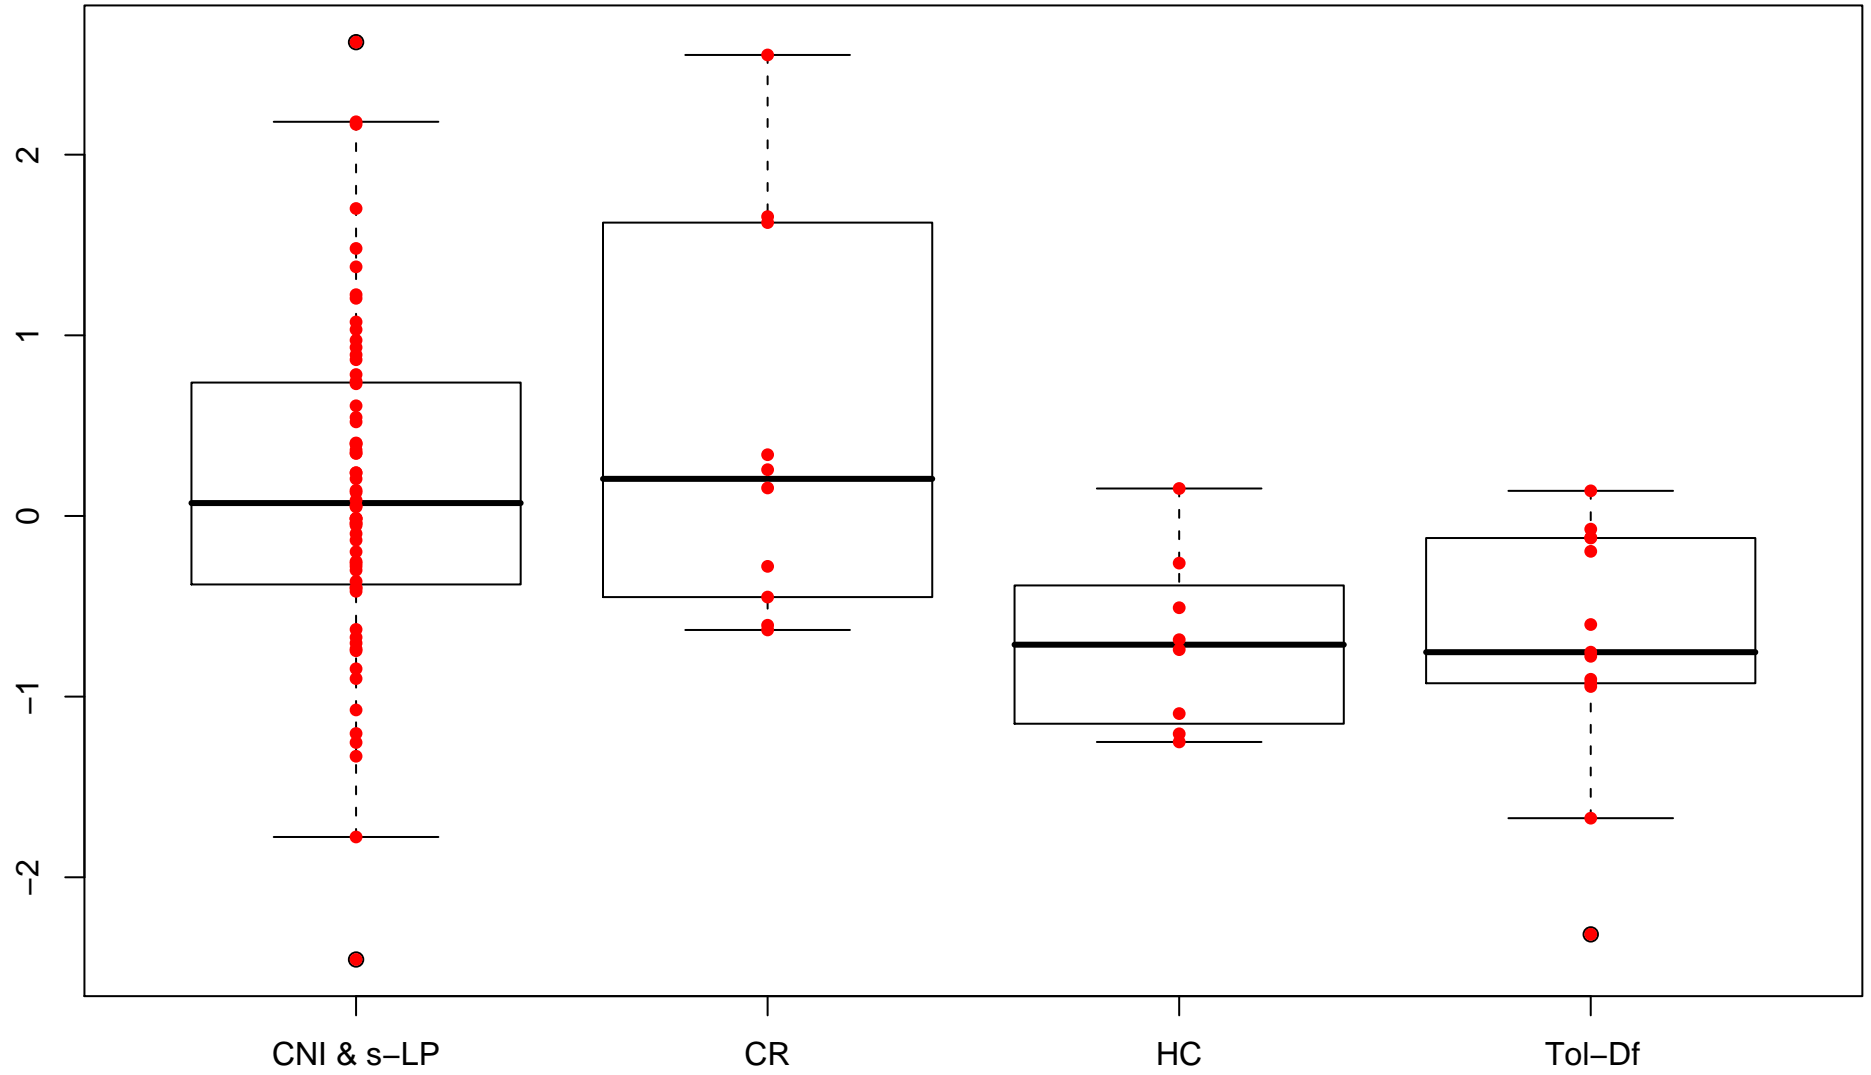

Rank 174 : TXNDC13  
0.0004759

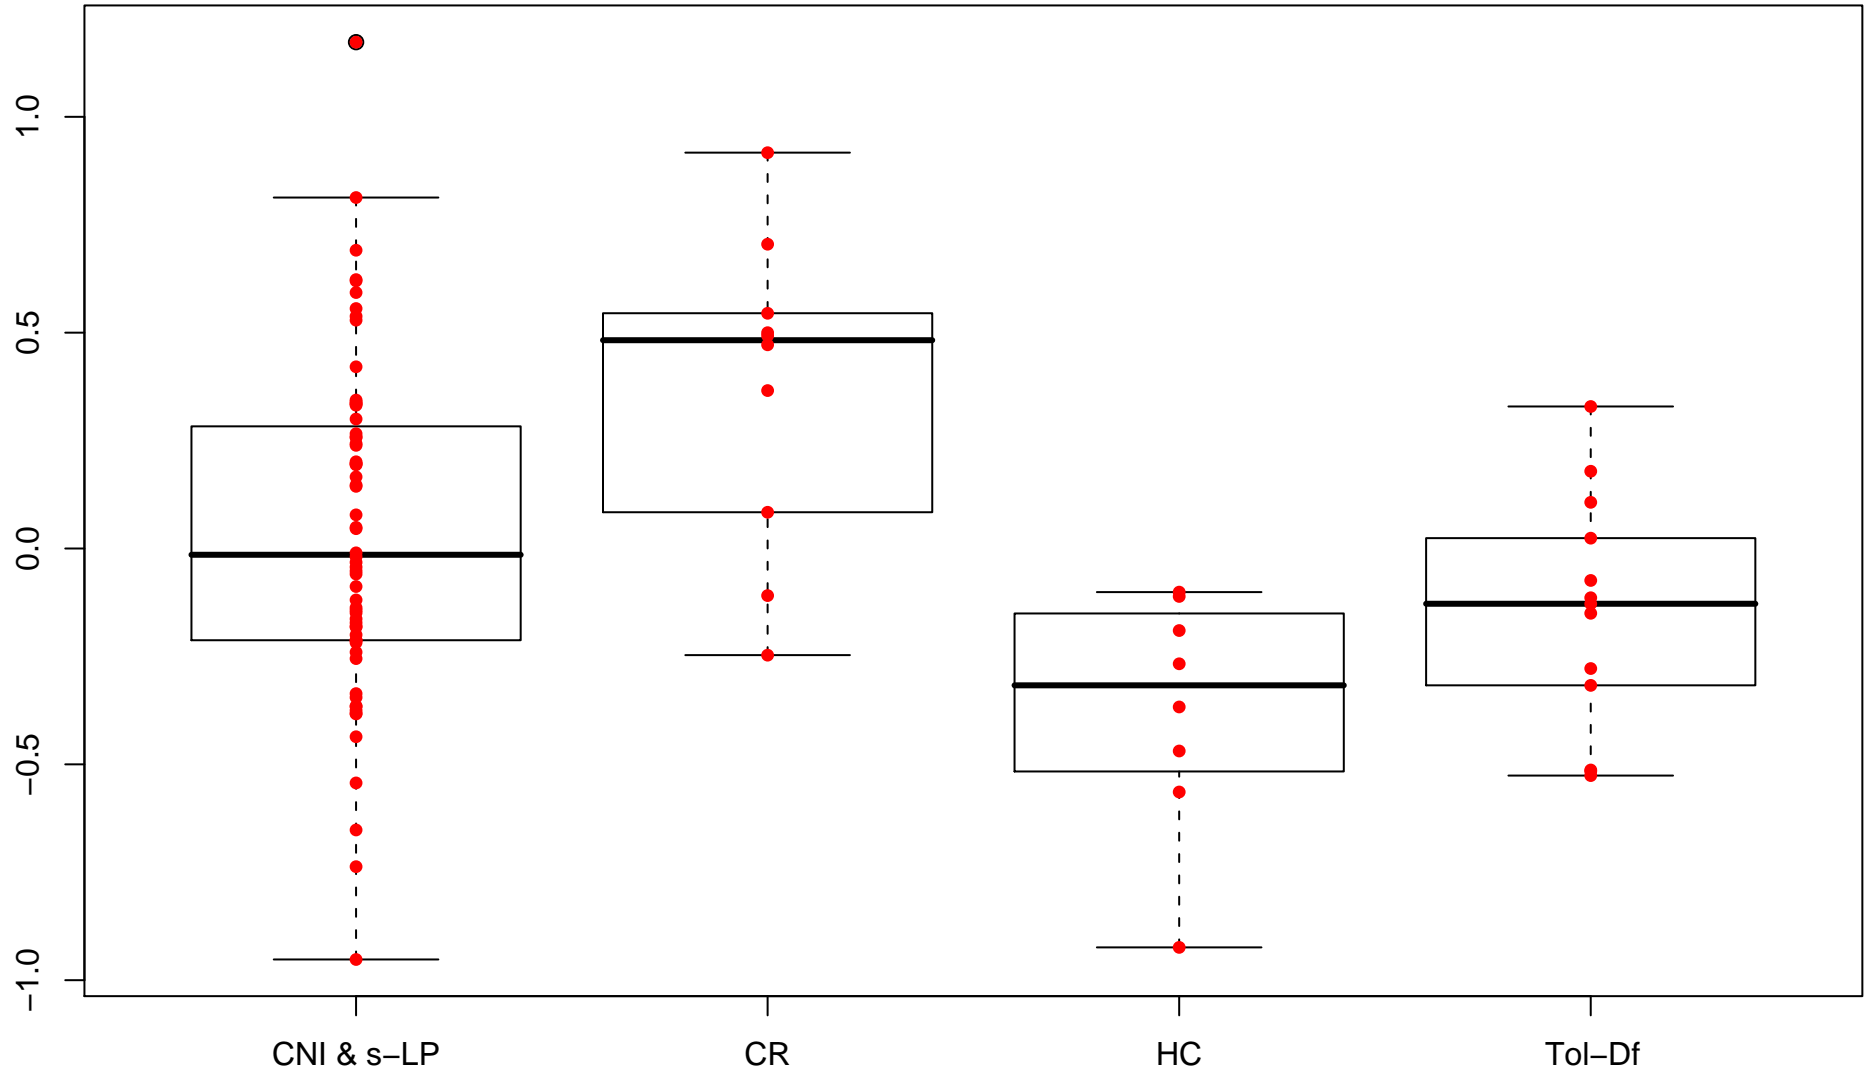

Rank 175 : OR2M1P;OR2M2  
0.0004778

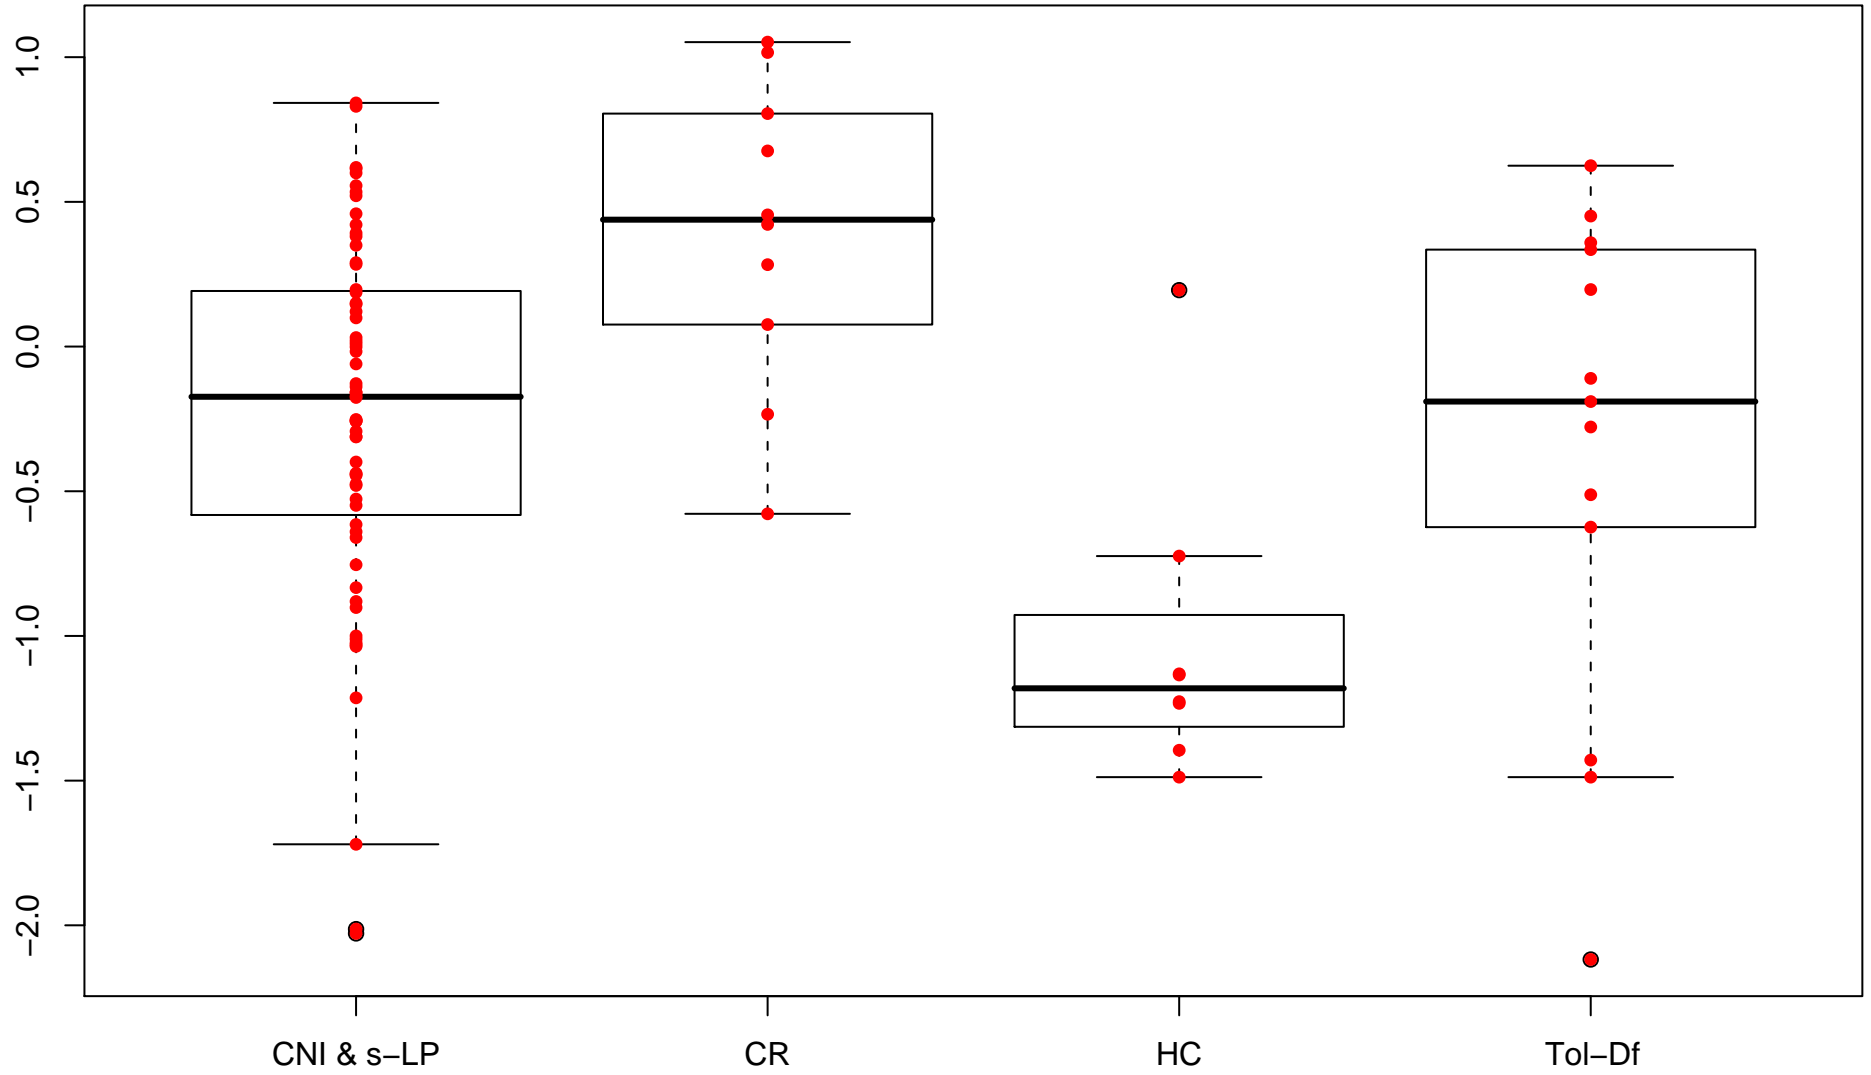

Rank 176 : FCAR  
0.0004804

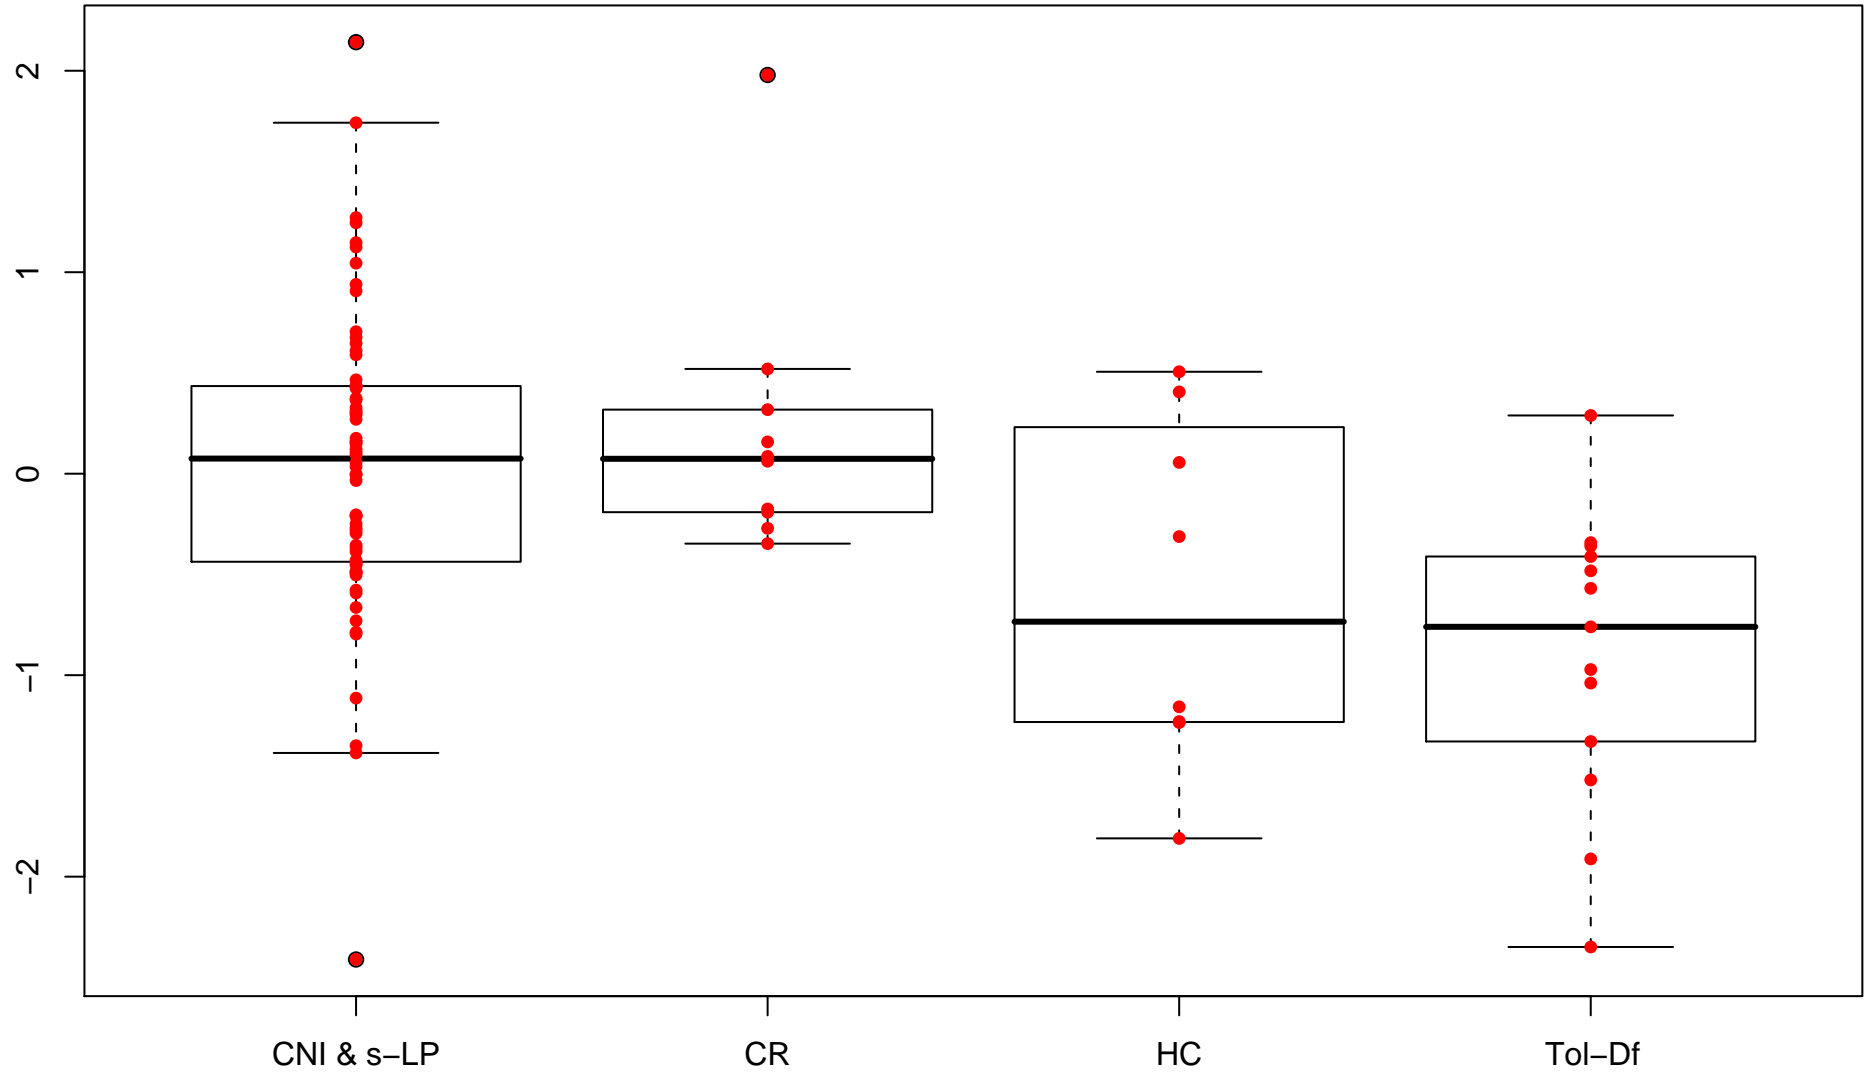

Rank 177 : BTG2  
0.0004977

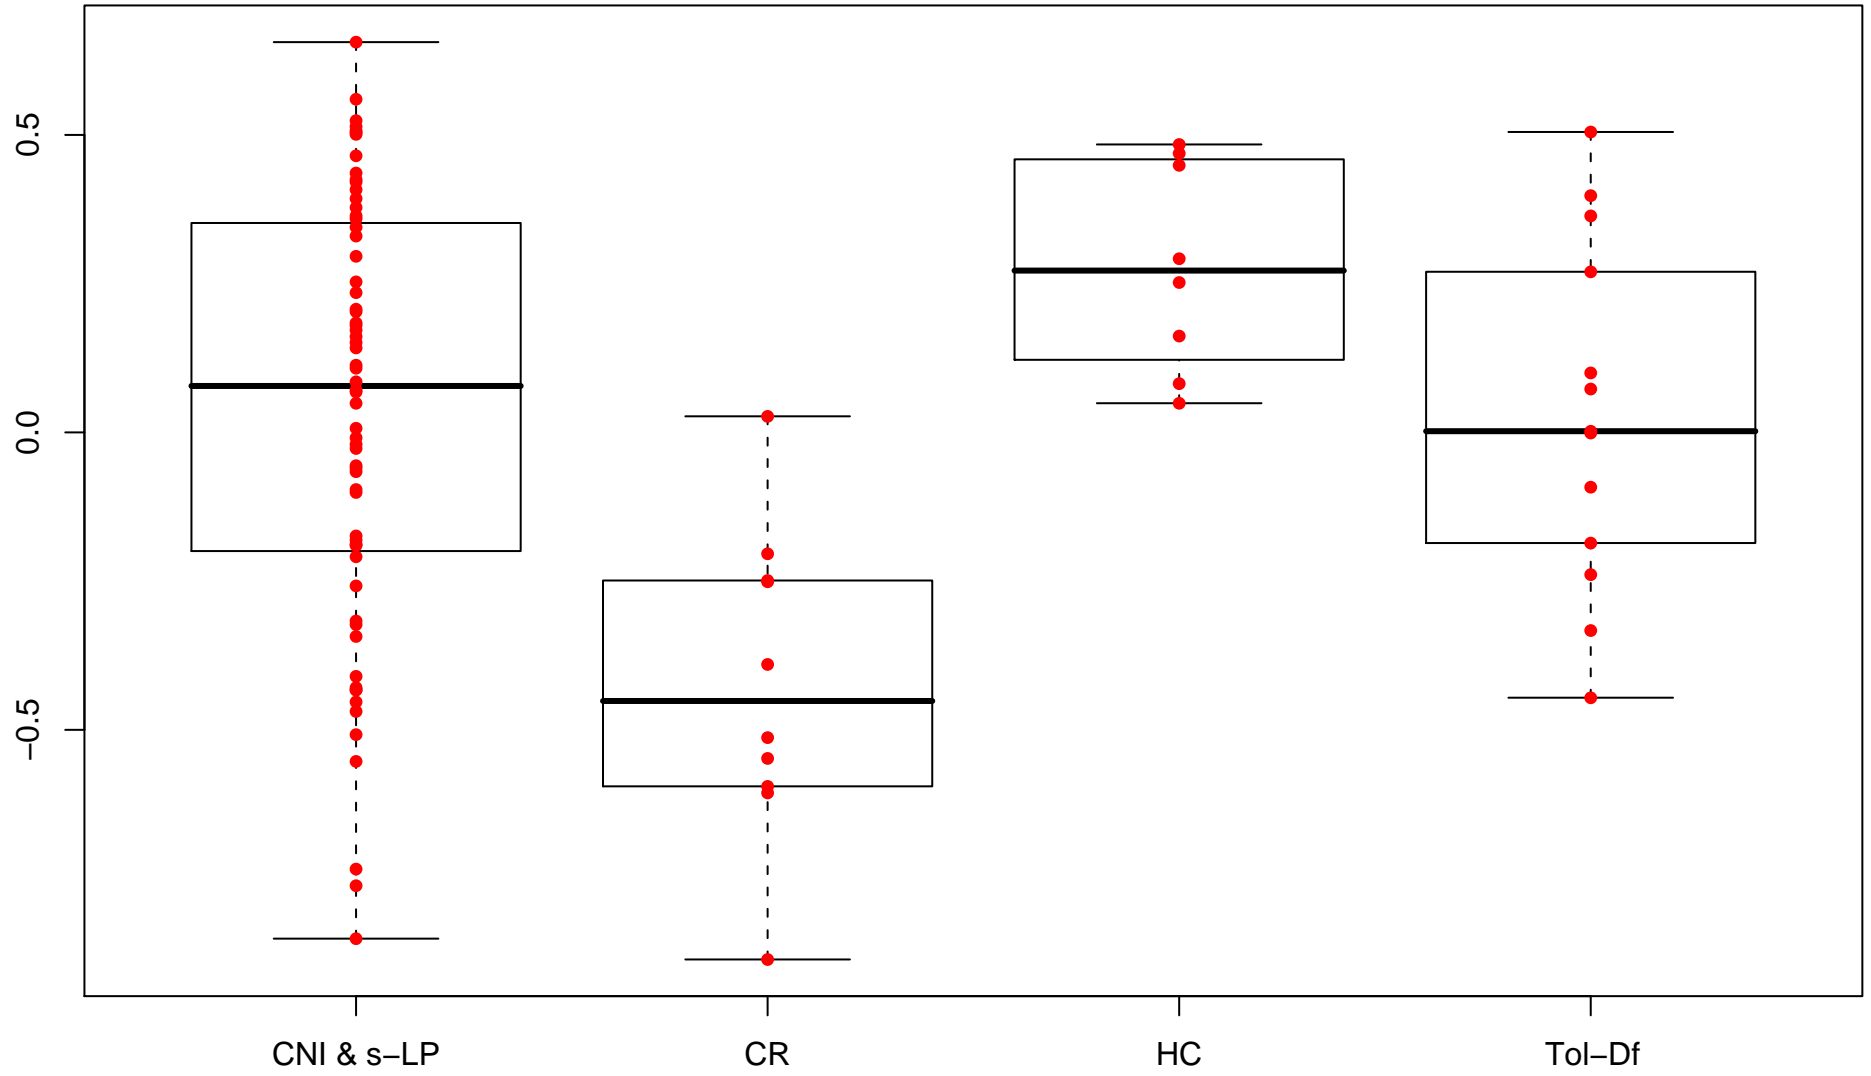

Rank 178 : VCPIP1  
0.0005103

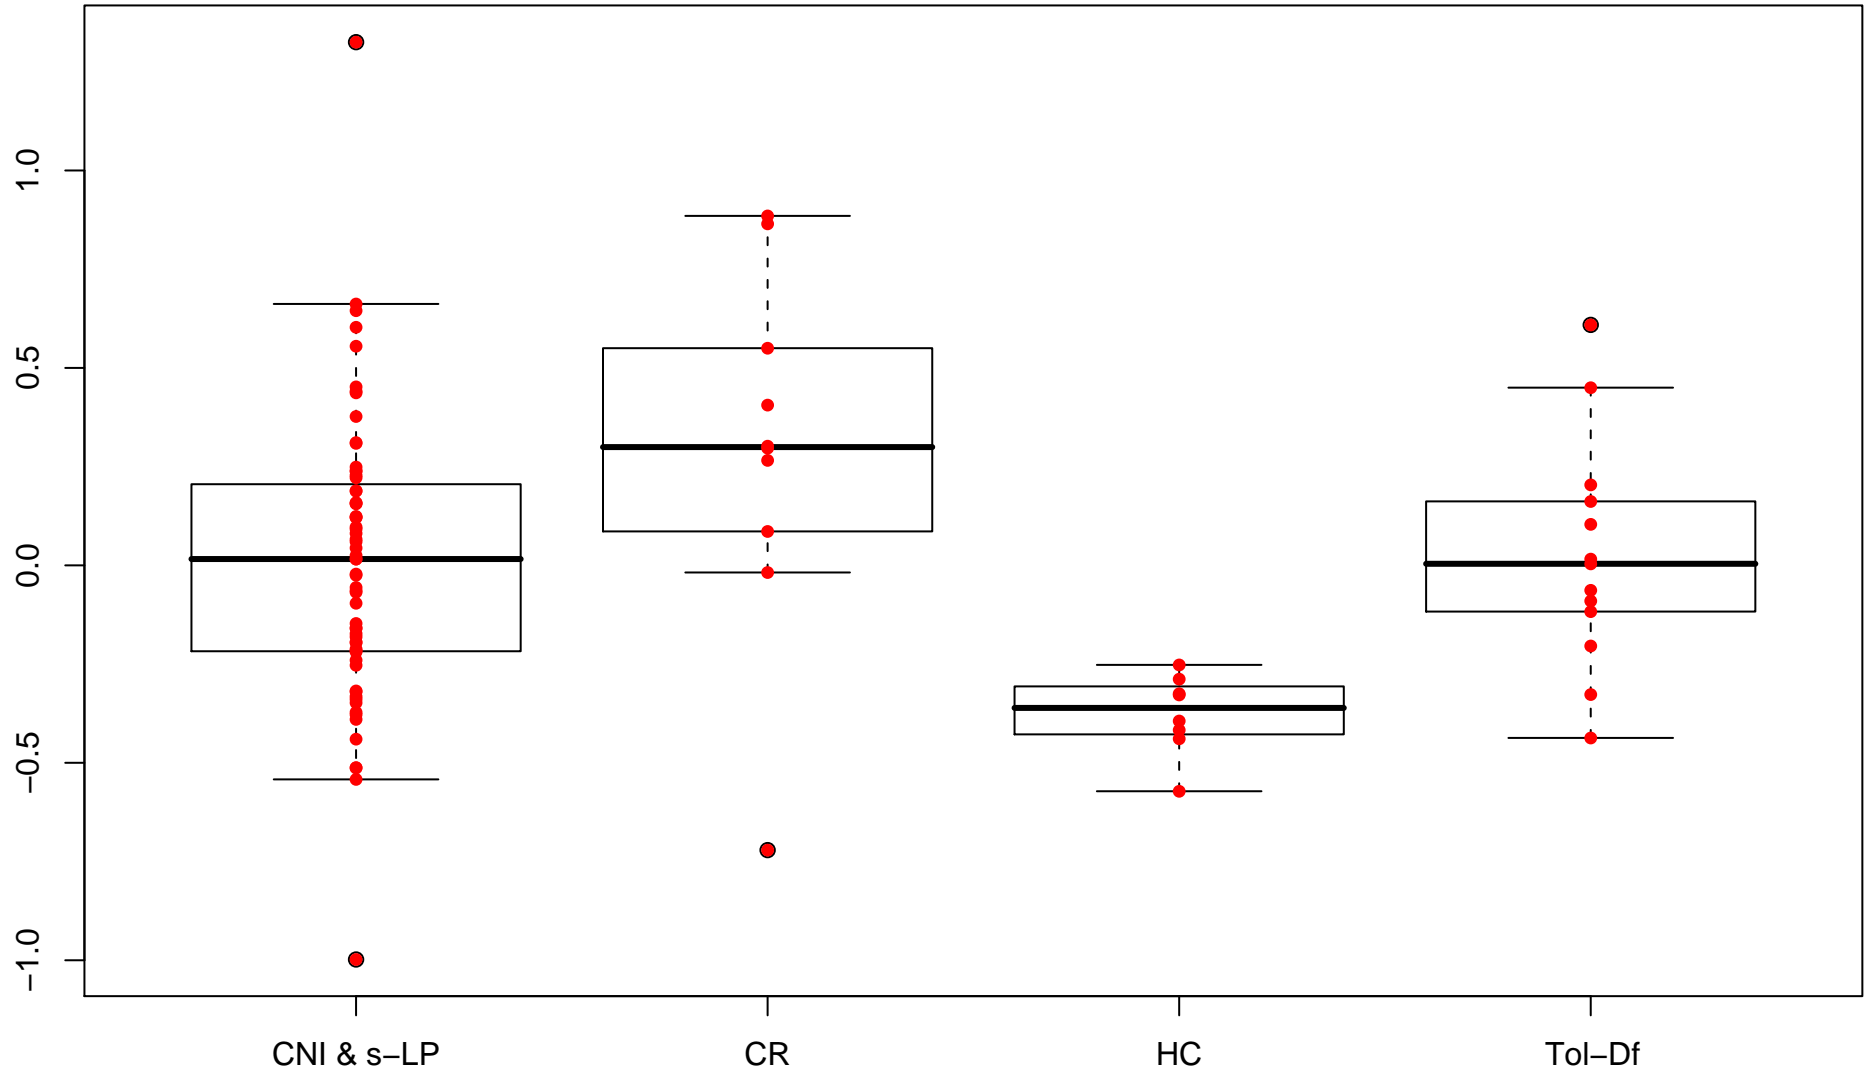



Rank 179 : SATB1  
0.0005111

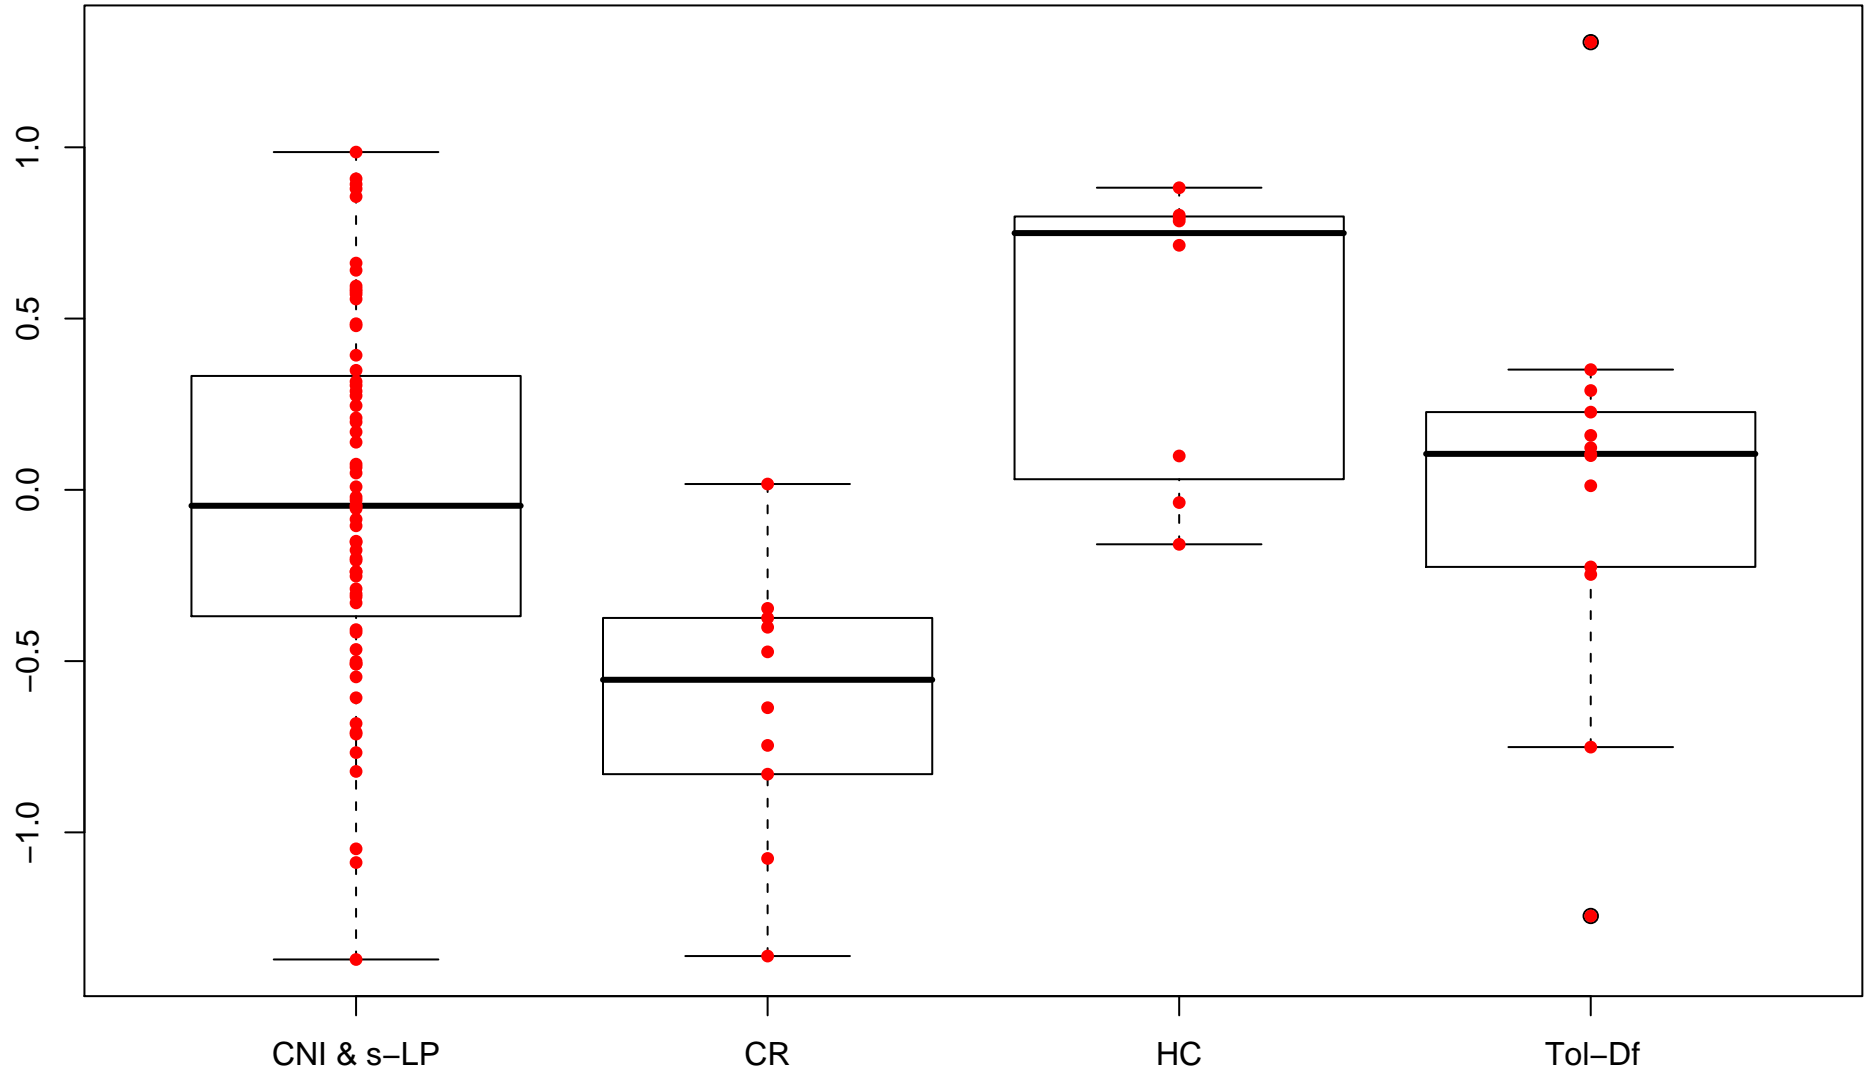

Rank 180 : PAK1  
0.0005242

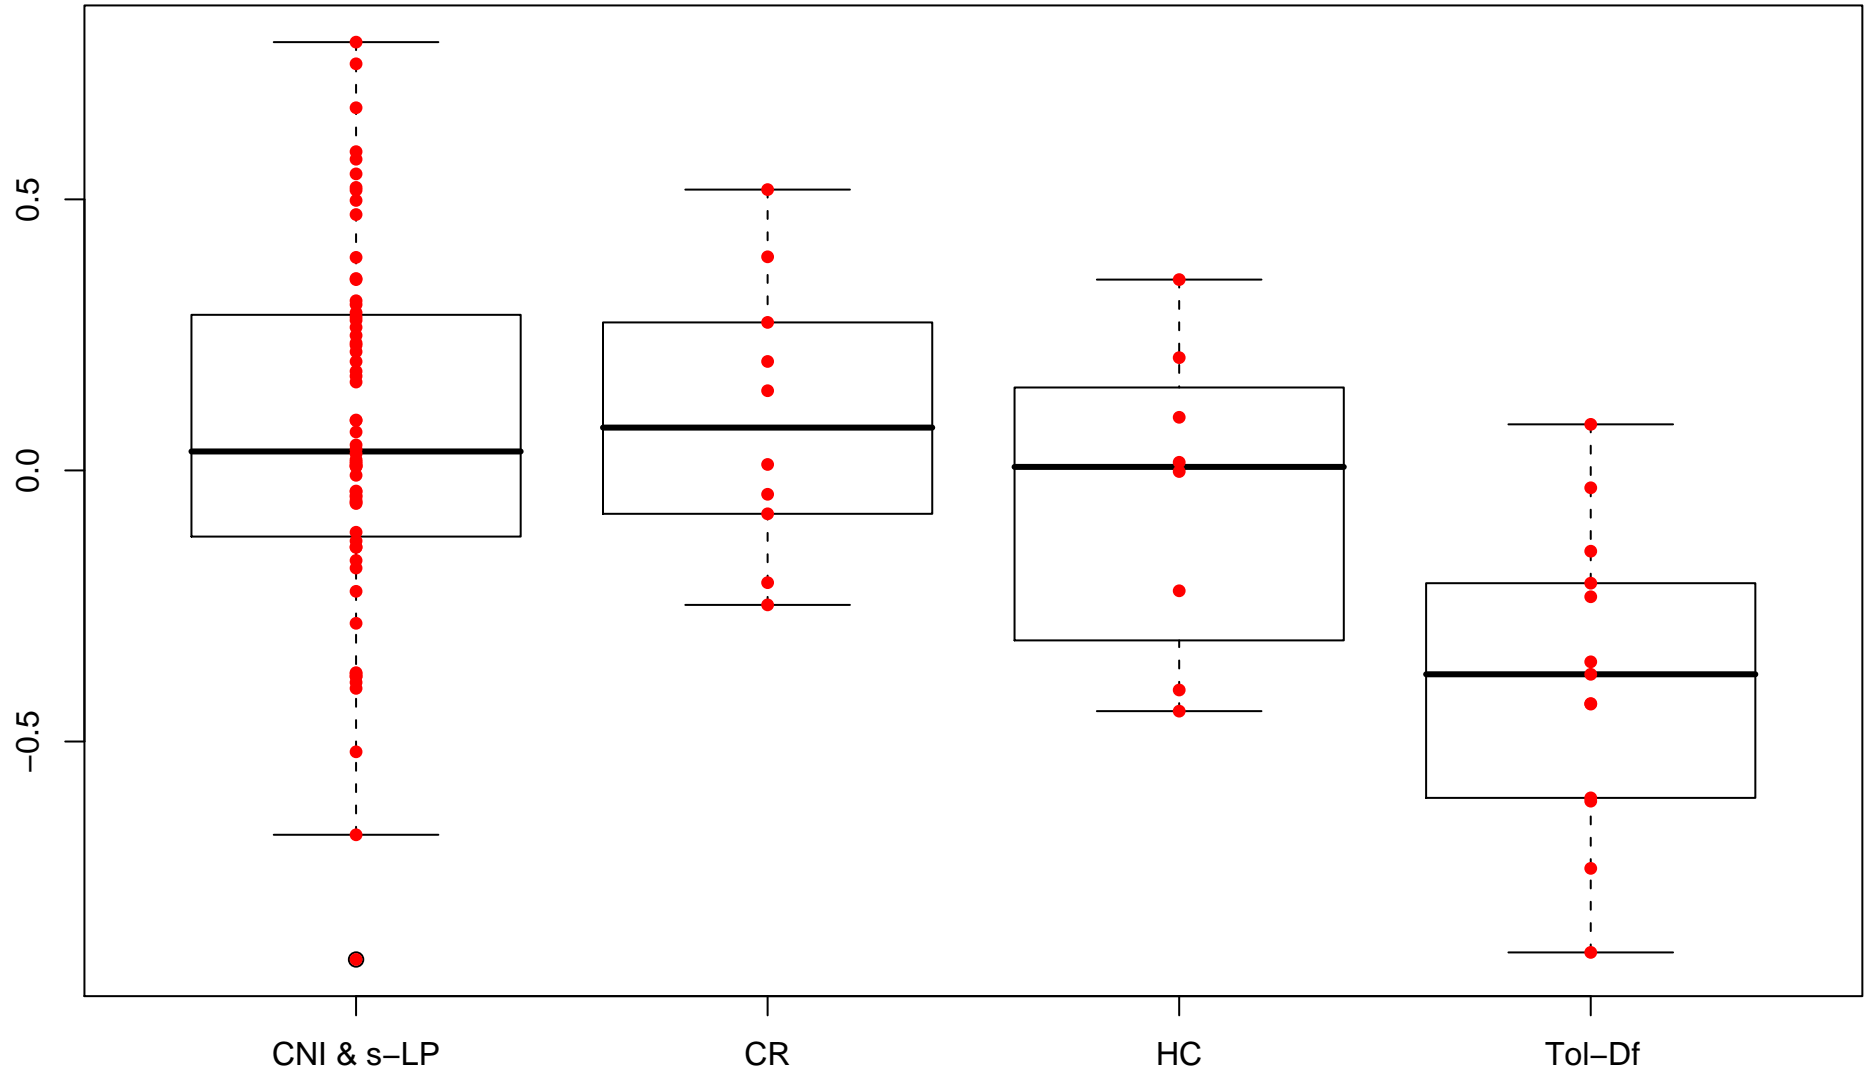

Rank 181 : PDLIM7  
0.0005243

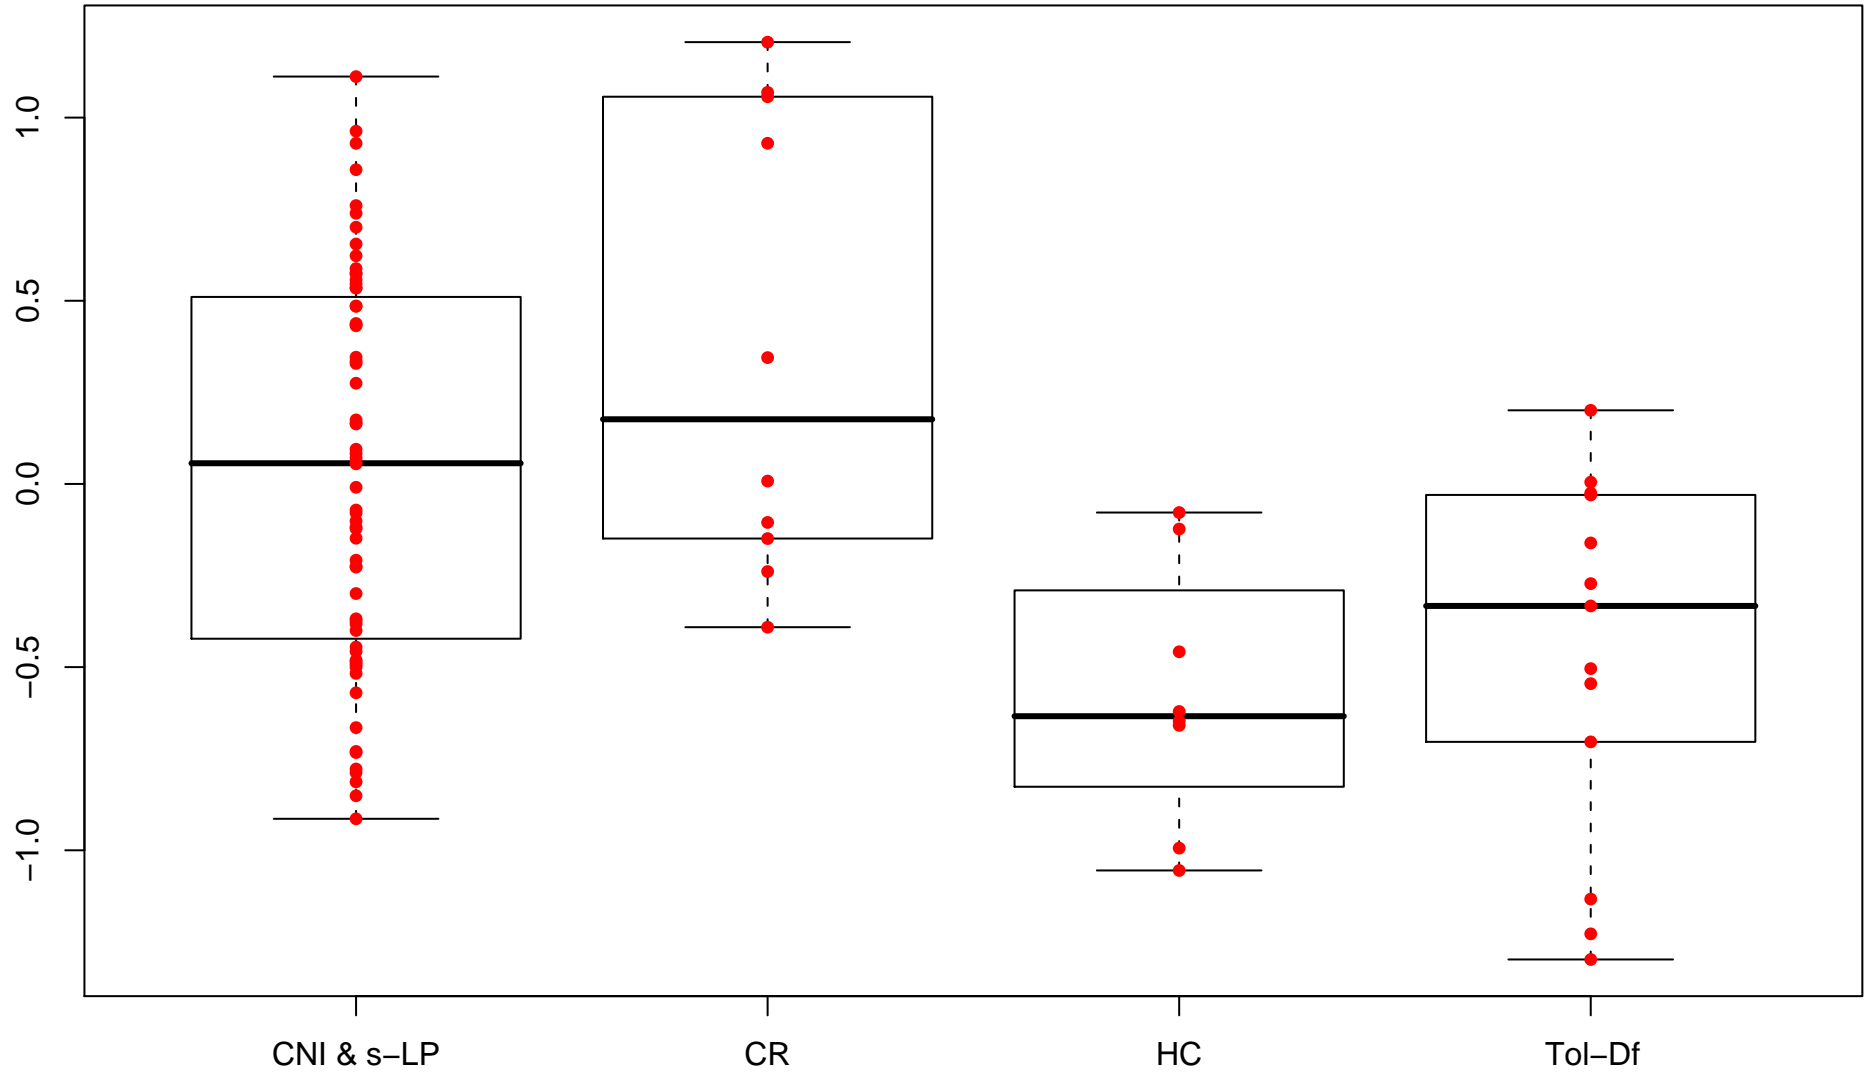

Rank 182 : NOTCH2  
0.0005283

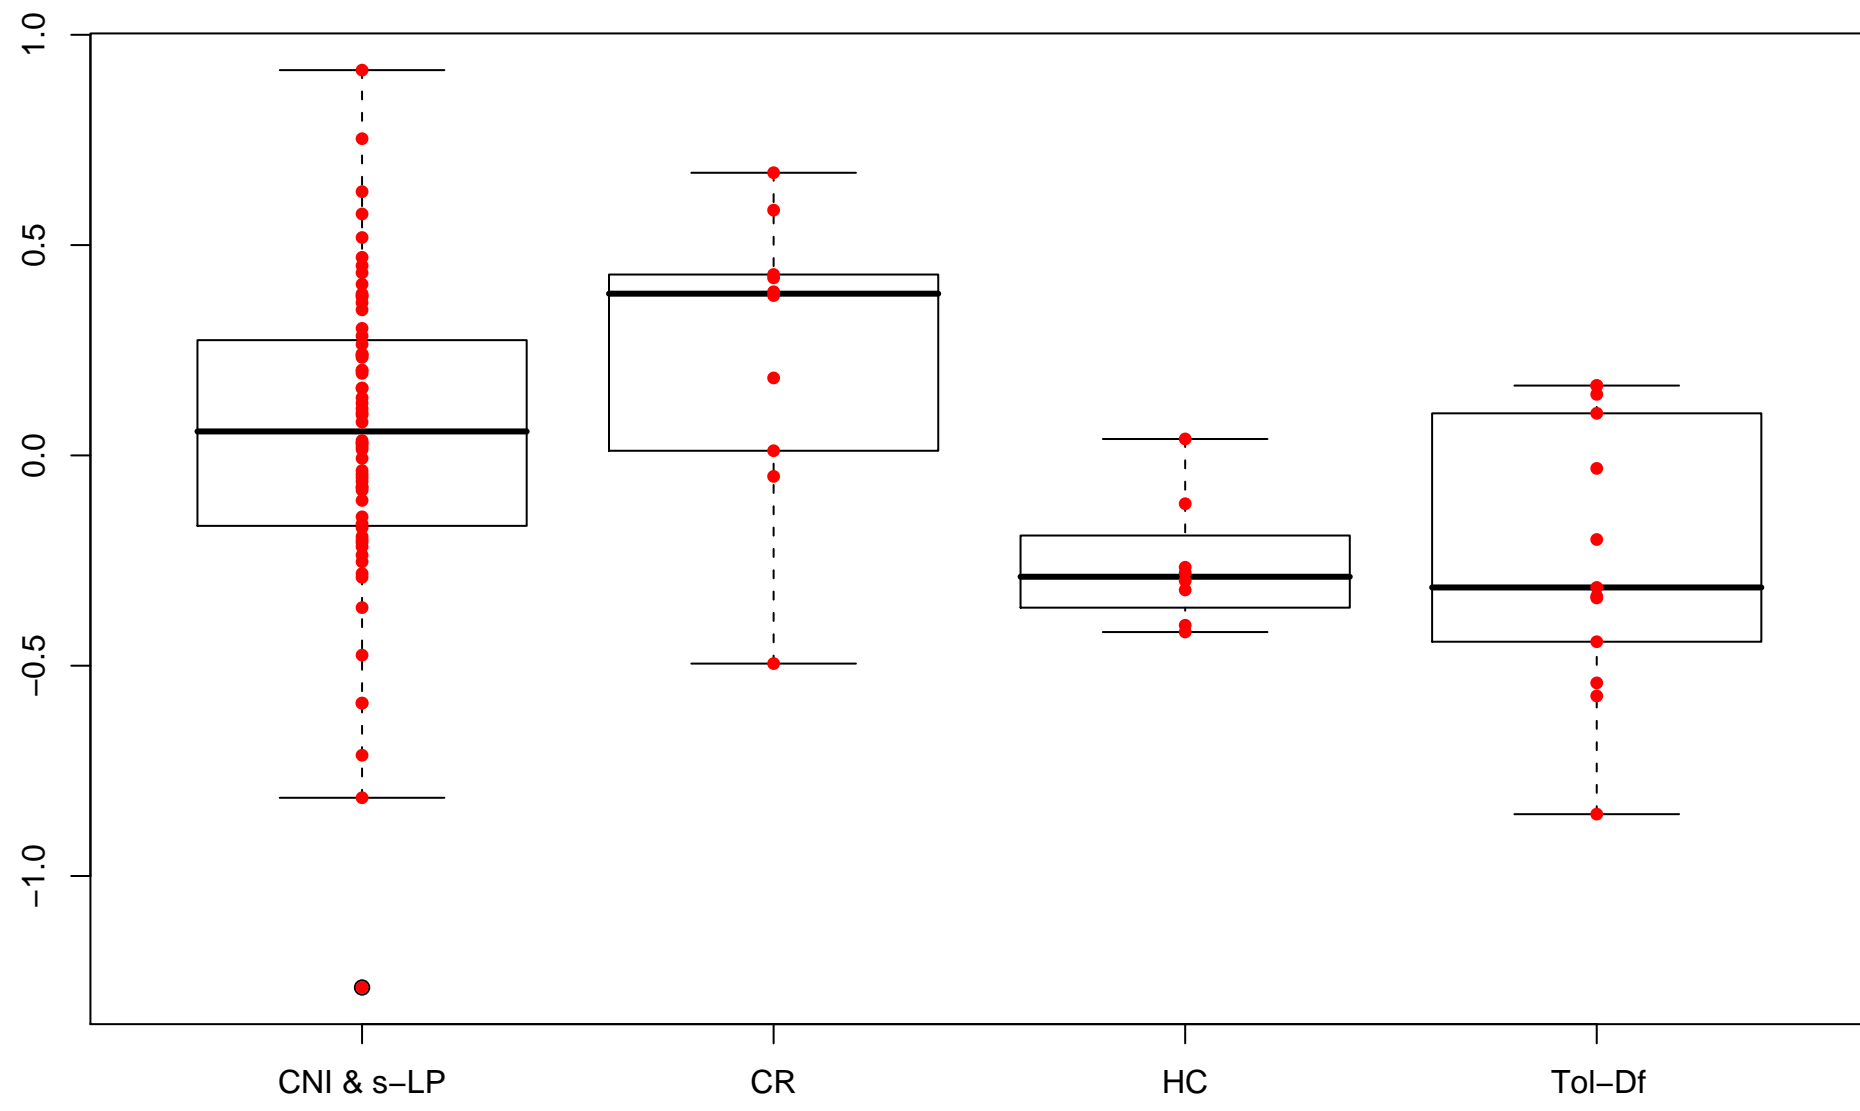

Rank 183 : A\_24\_P706752

0.0005314

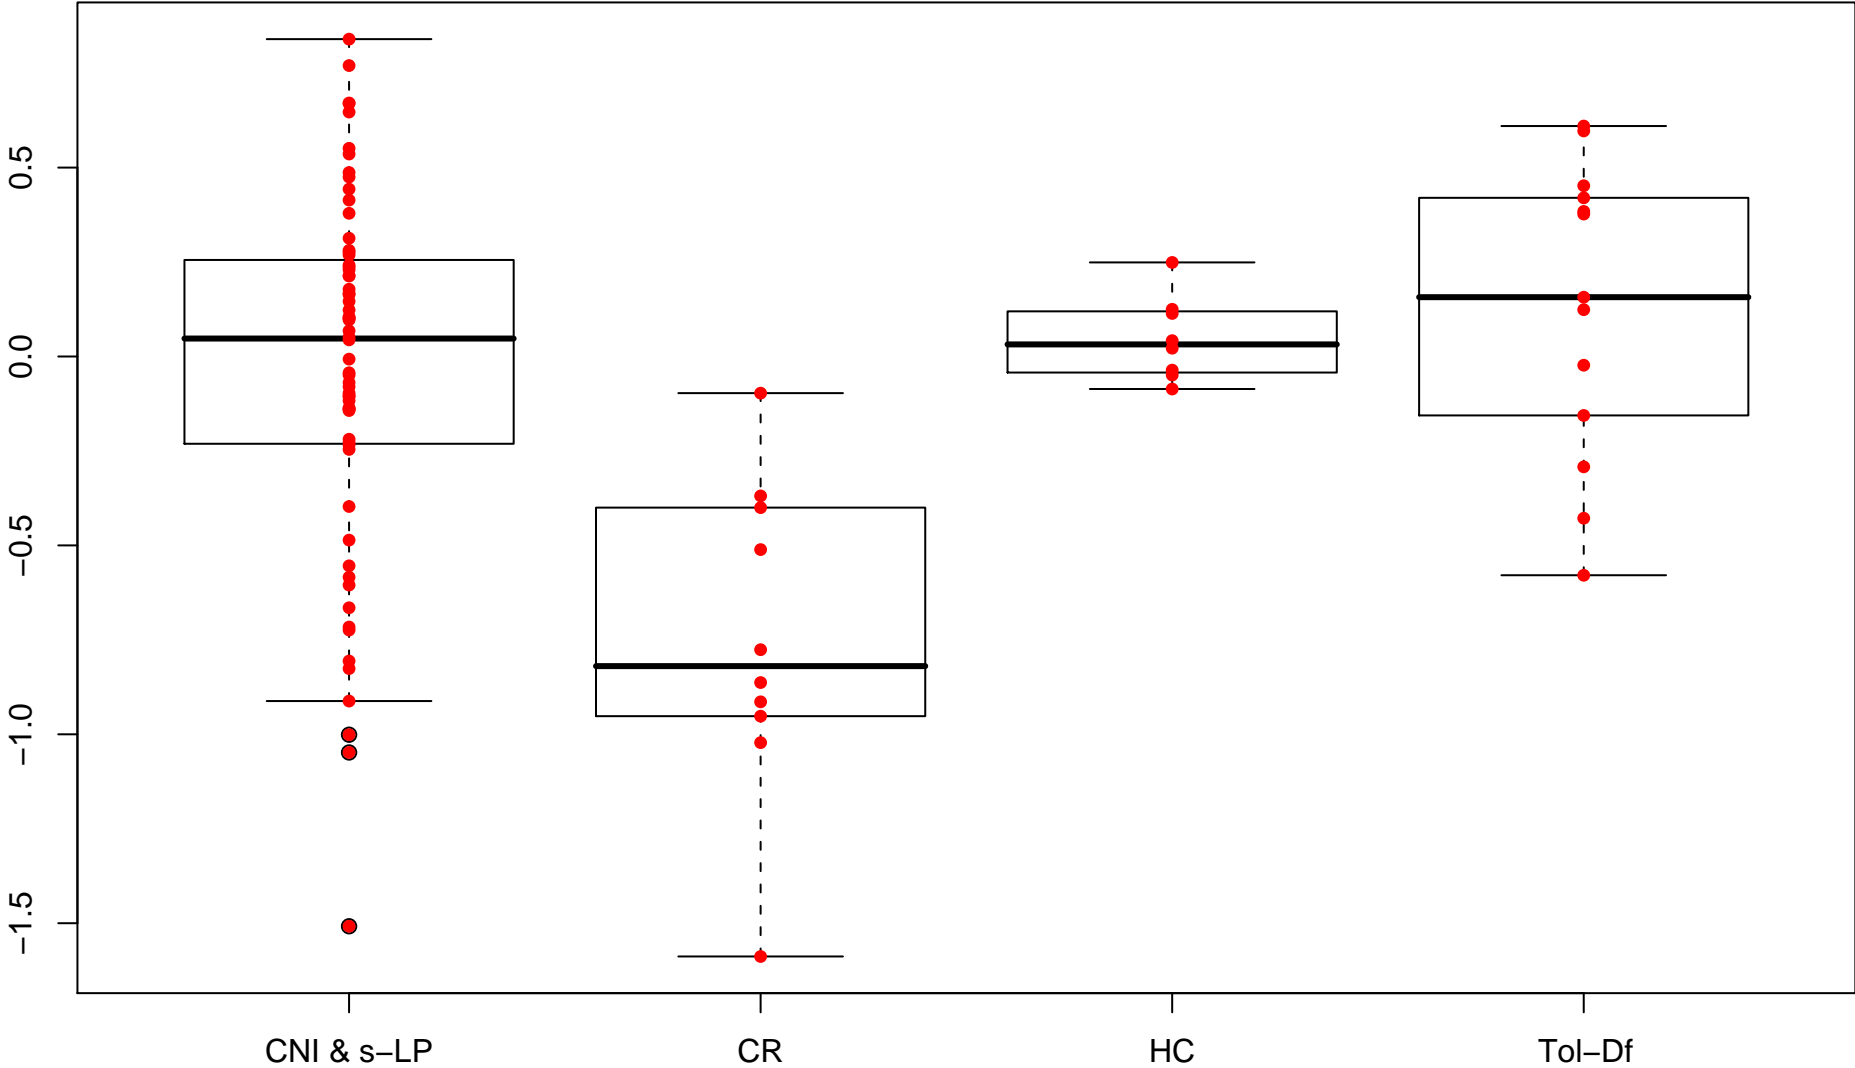

Rank 184 : IL23A  
0.0005405

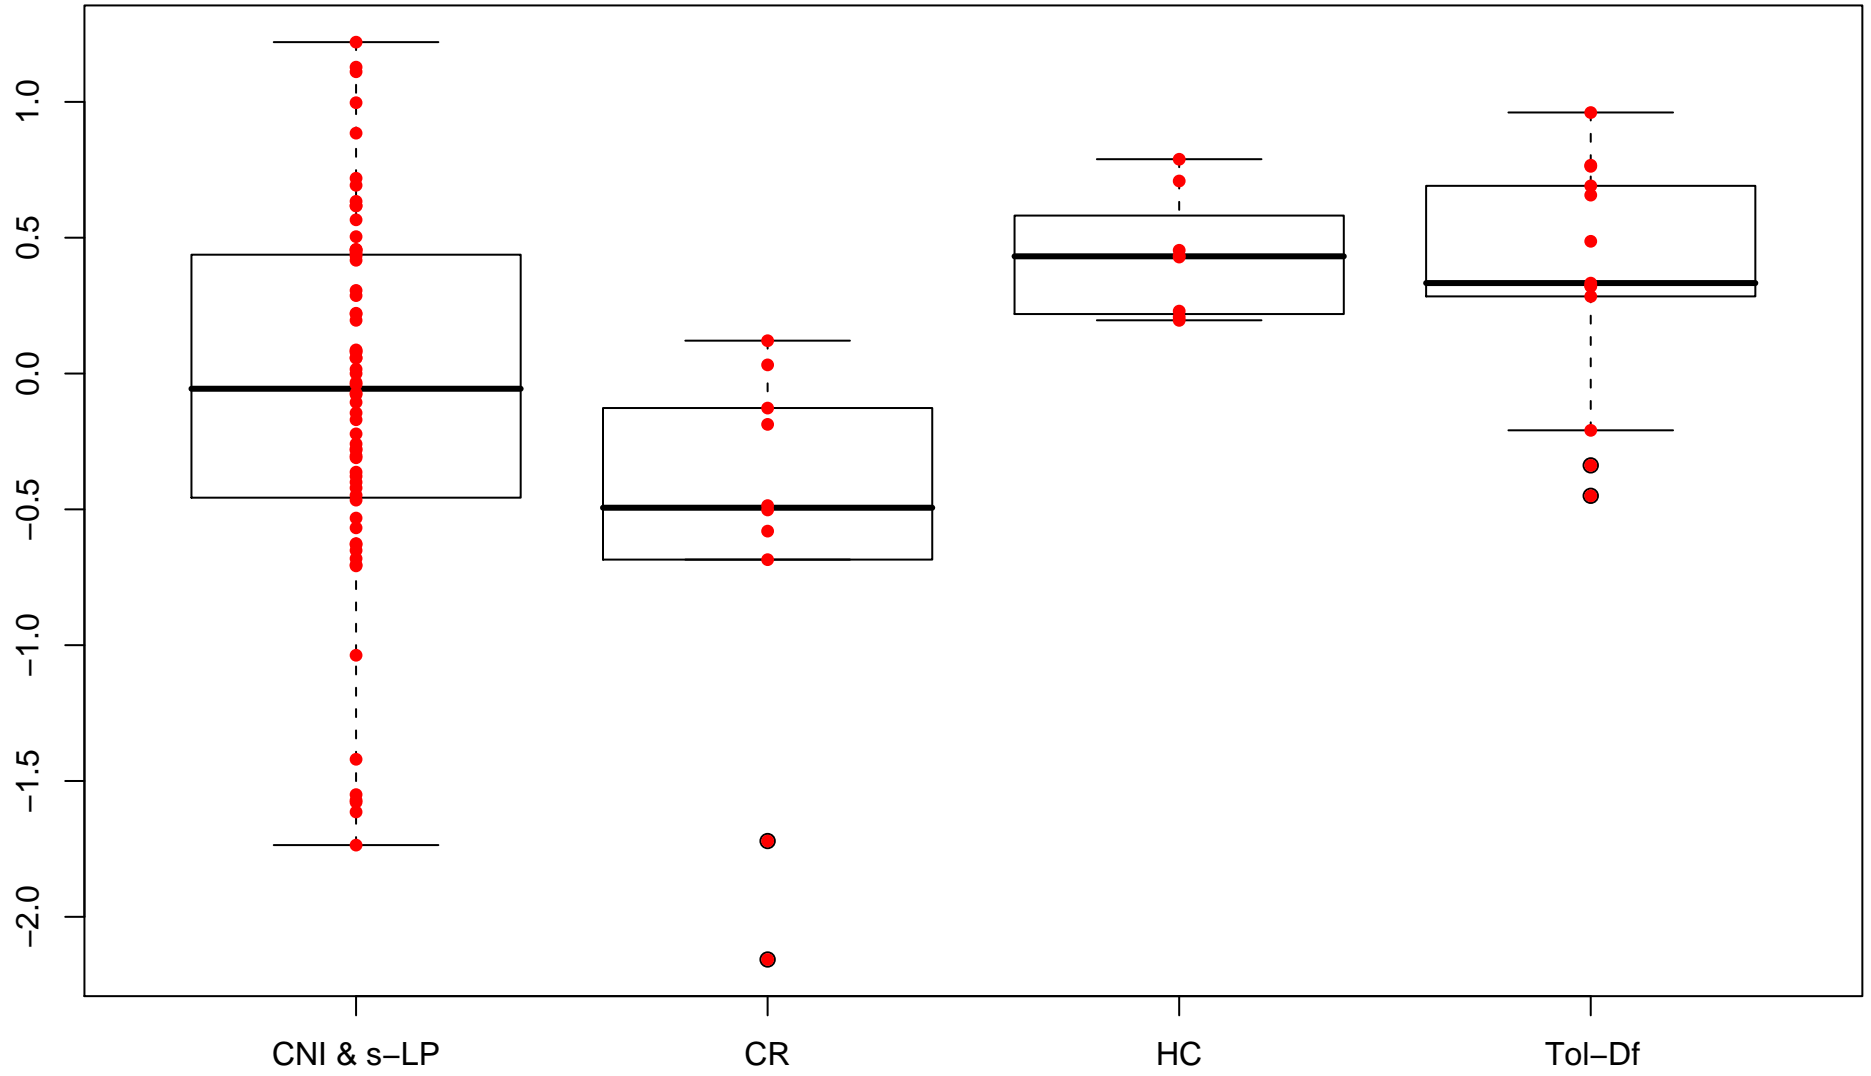

Rank 185 : DDEF1  
0.0005408

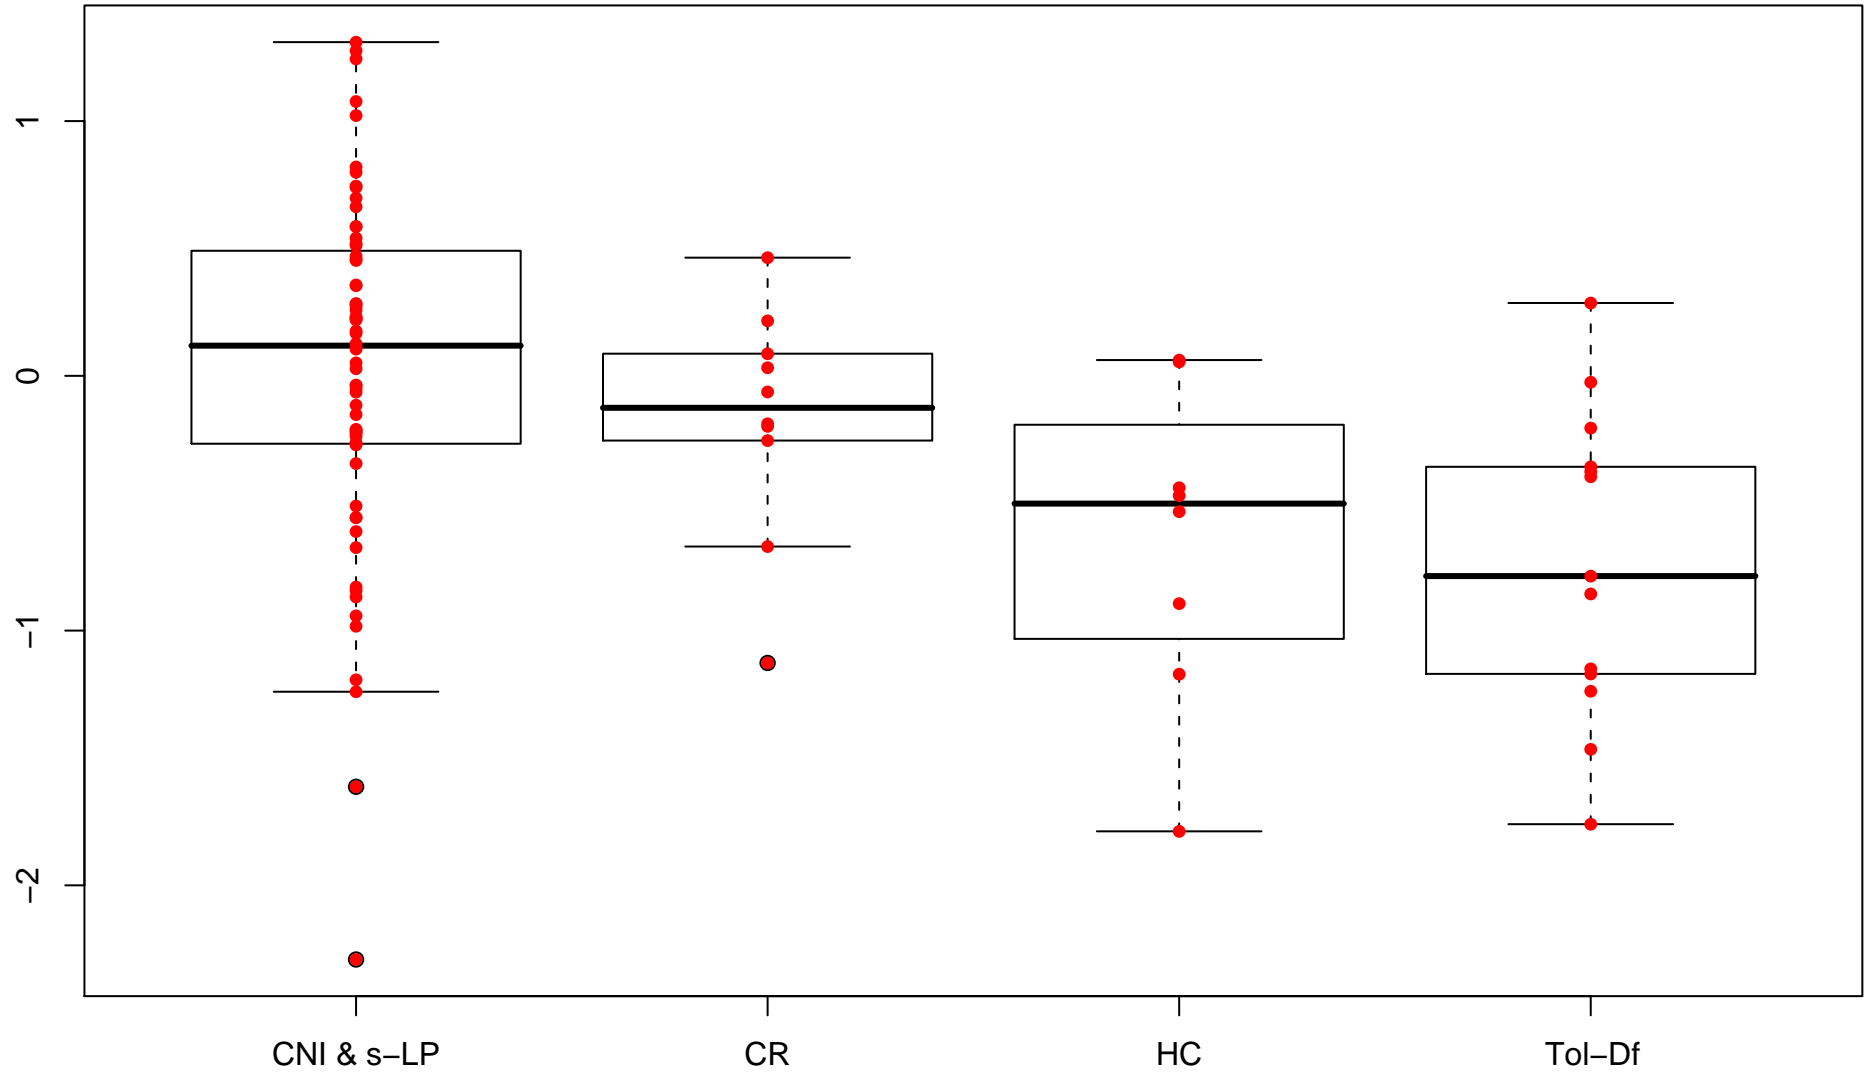

Rank 186 : GPRC5B  
0.00055

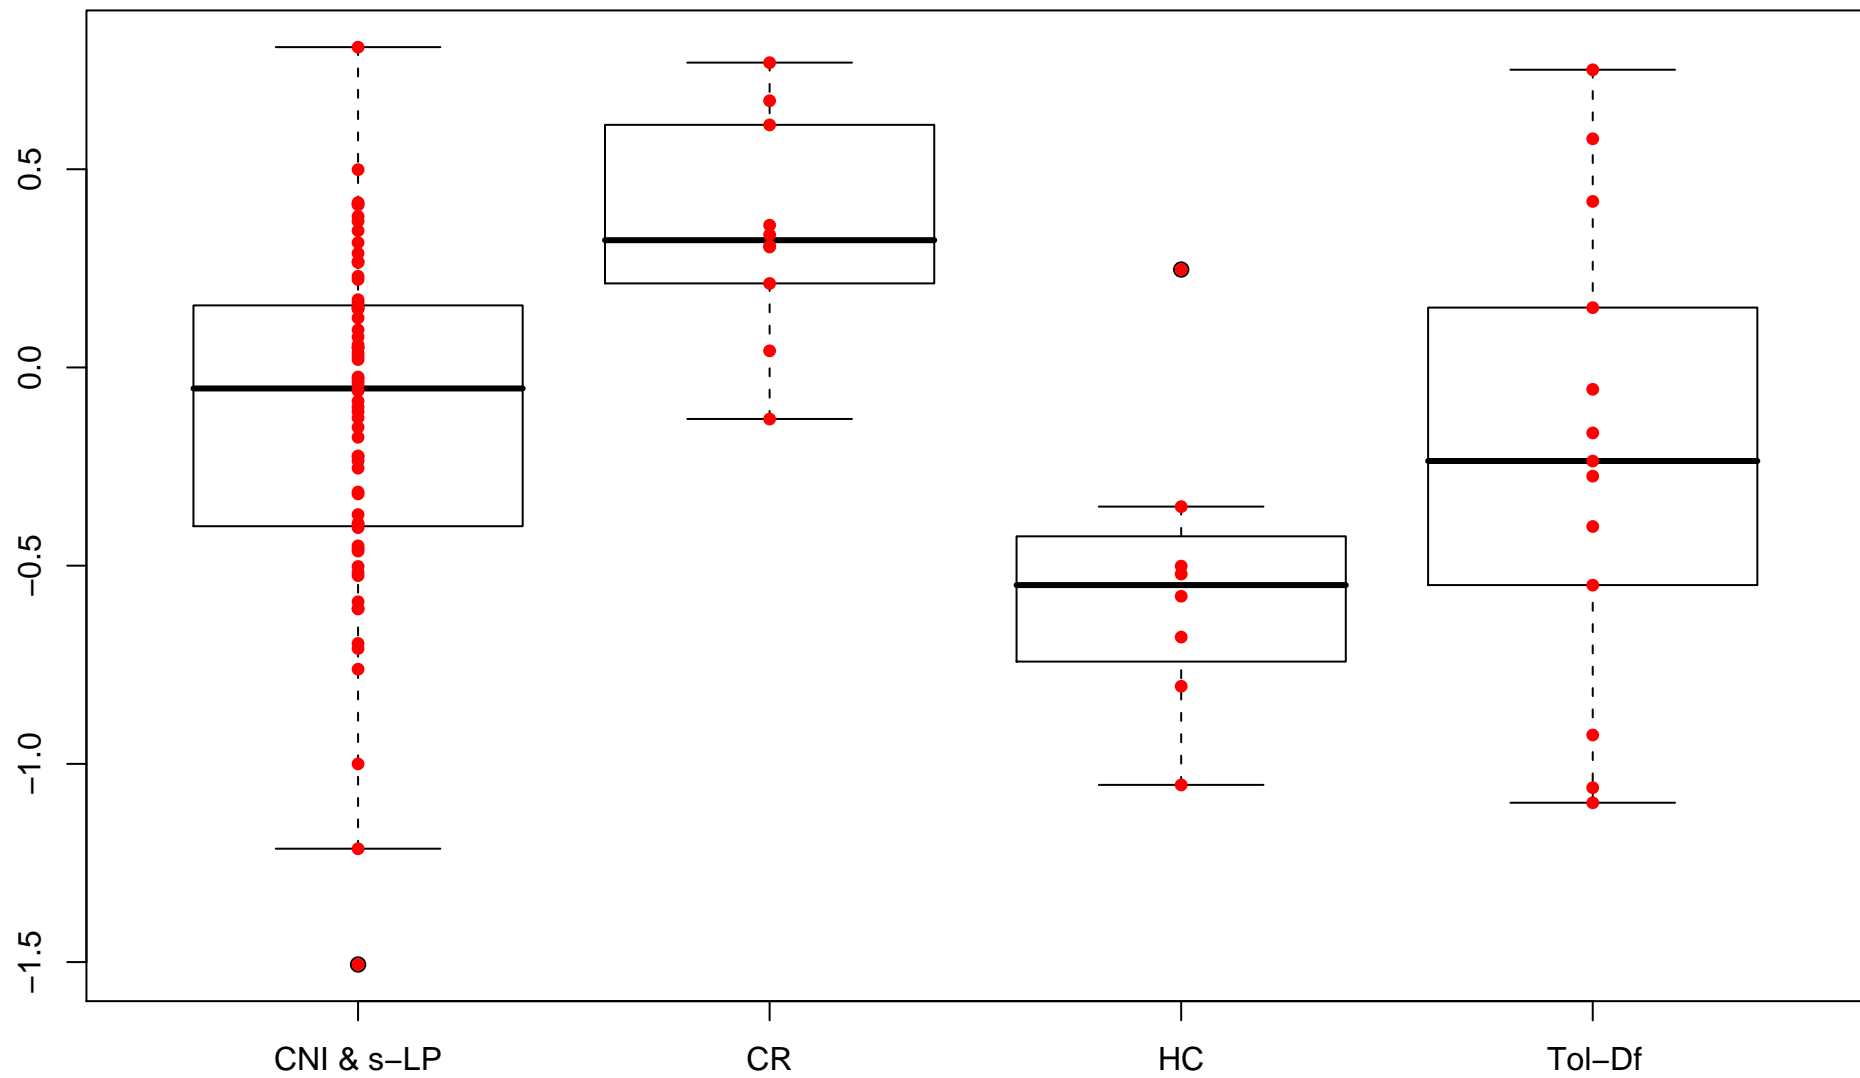



Rank 187 : XBP1  
0.0005502

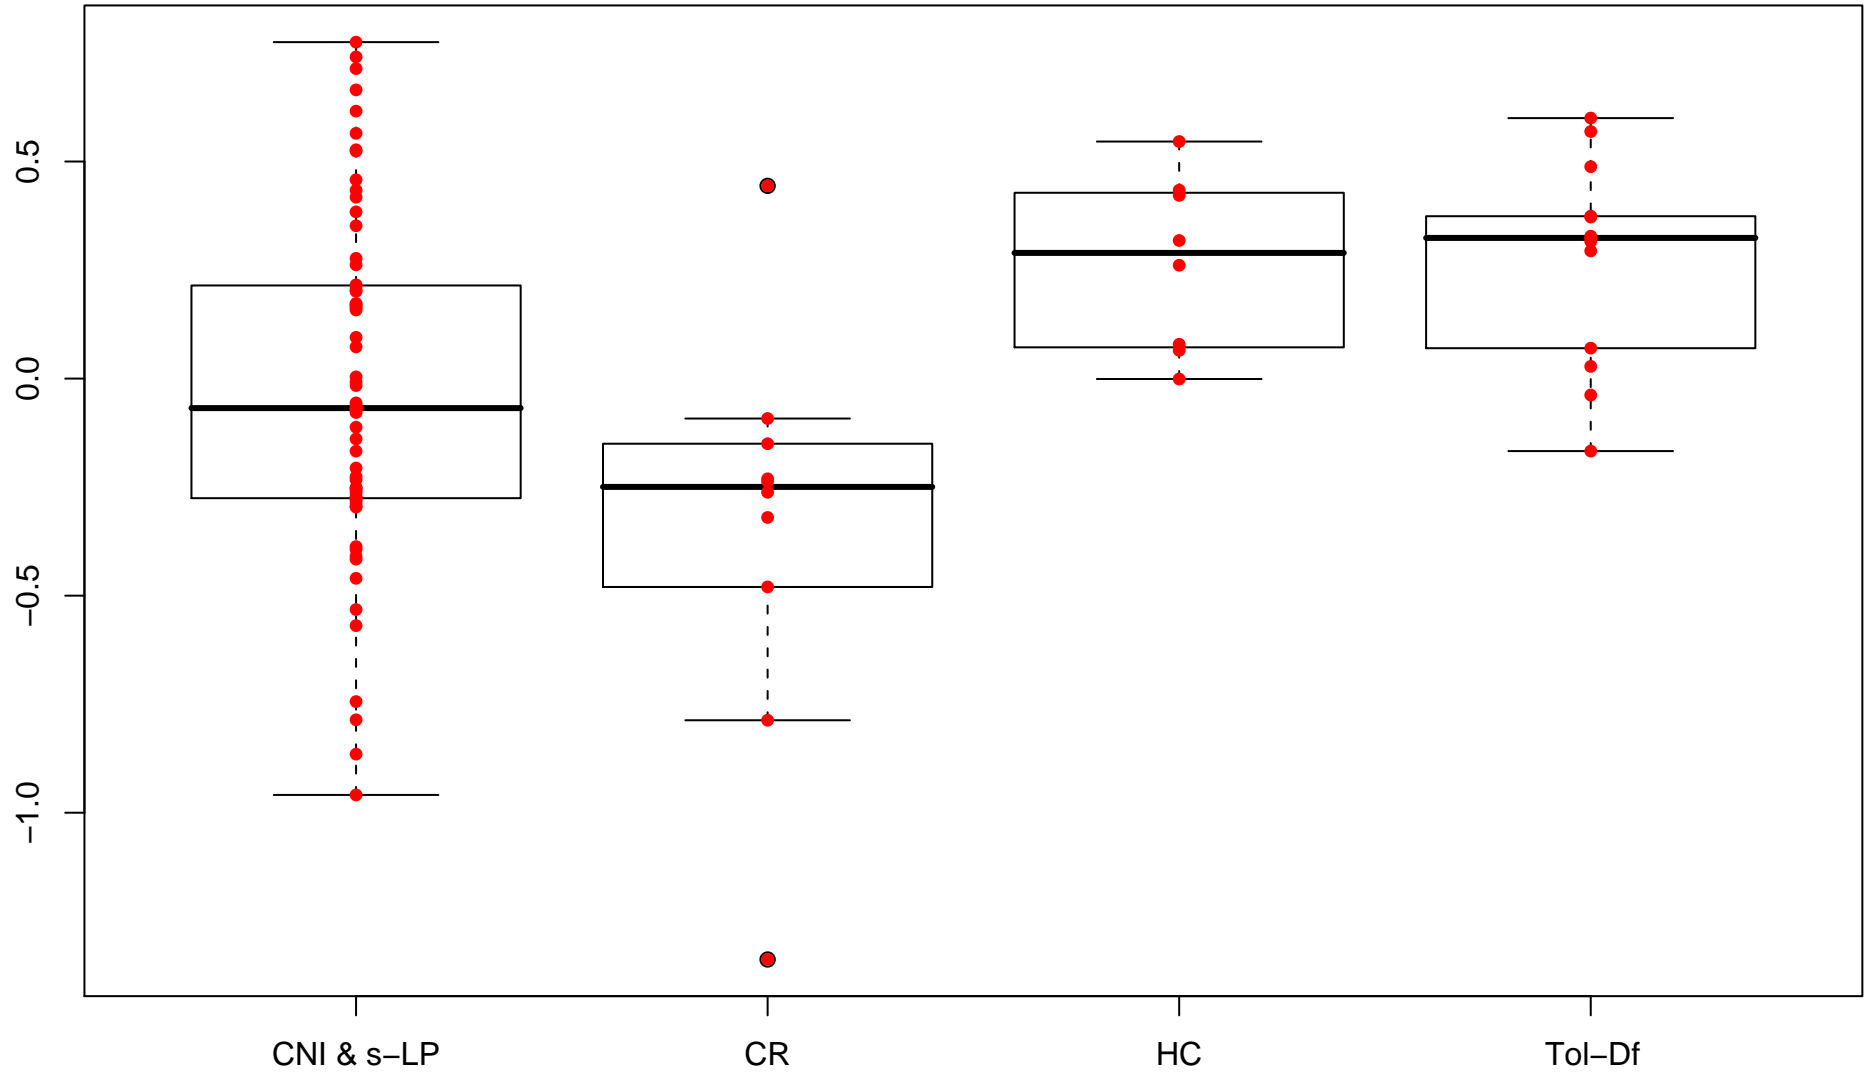

Rank 188 : SOCS3  
0.0005521

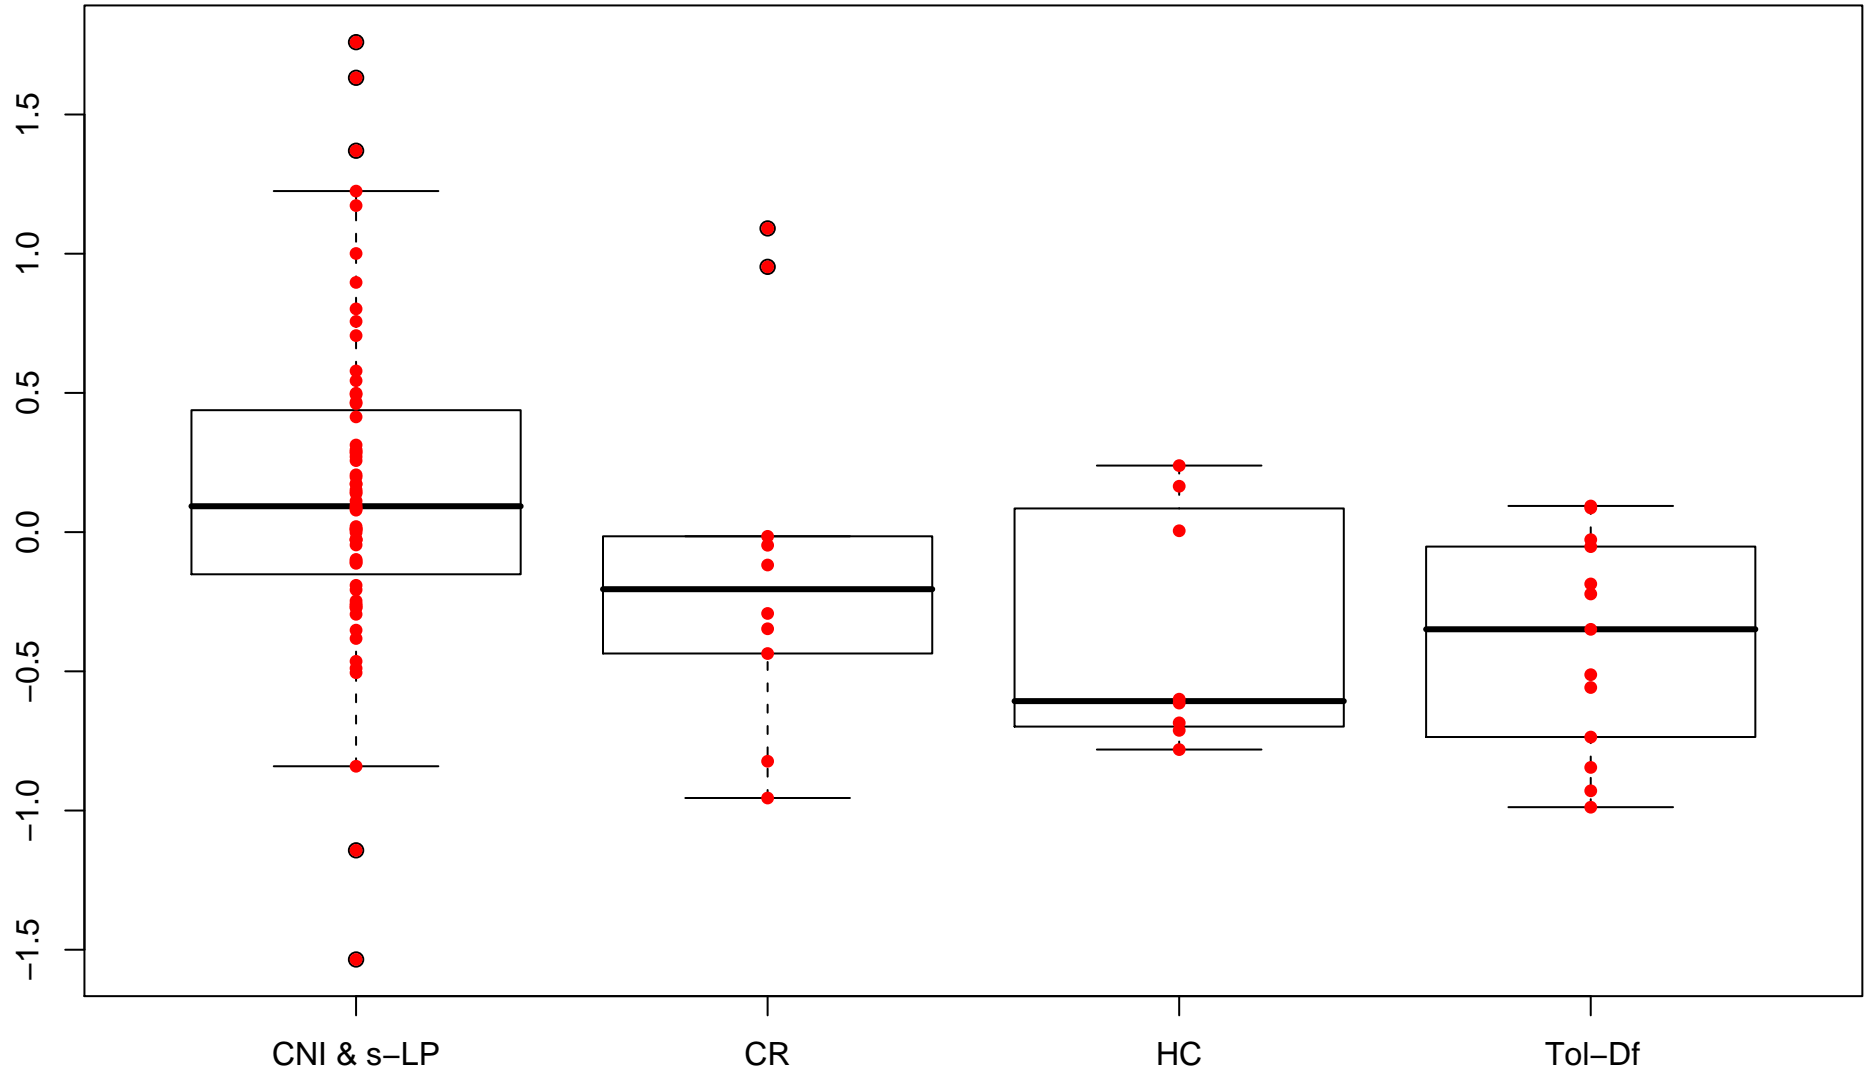

Rank 189 : SFRS10  
0.0005548

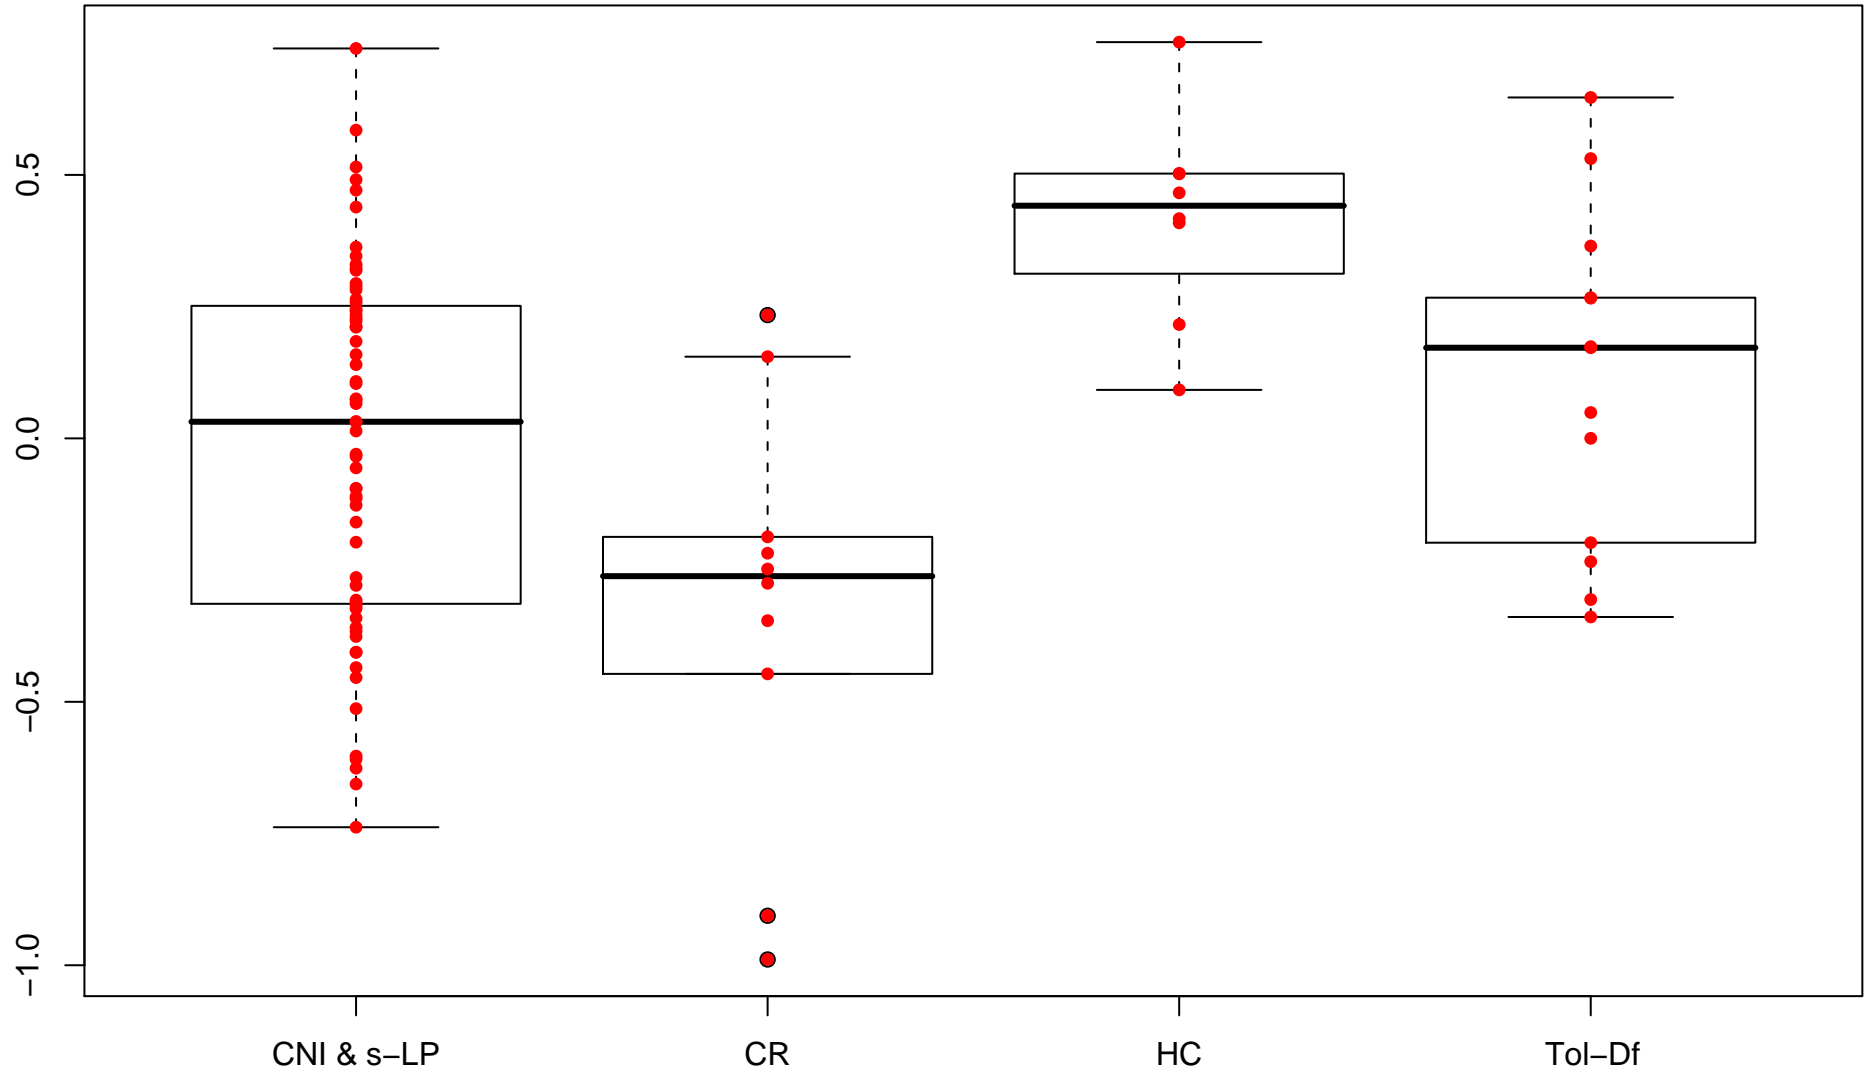

Rank 190 : TNFSF10  
0.0005615

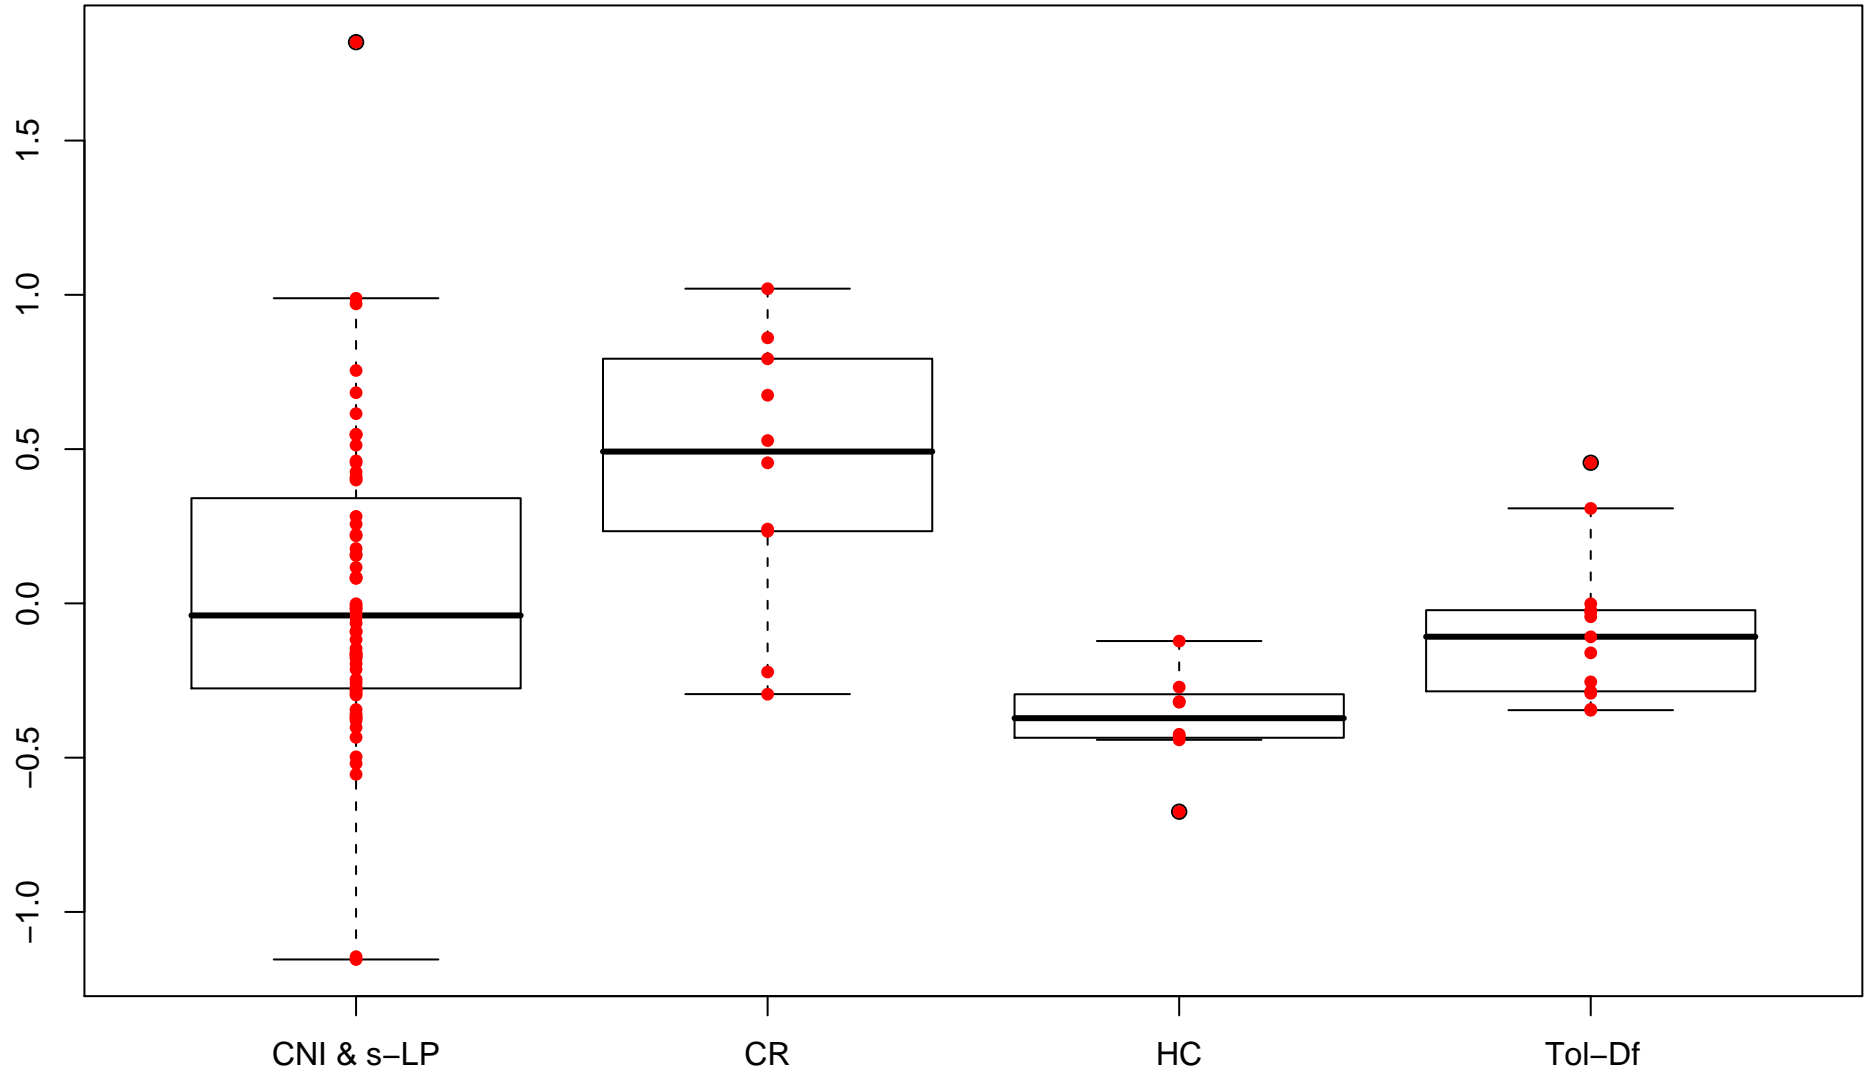

Rank 191 : B3GALT6  
0.0005628

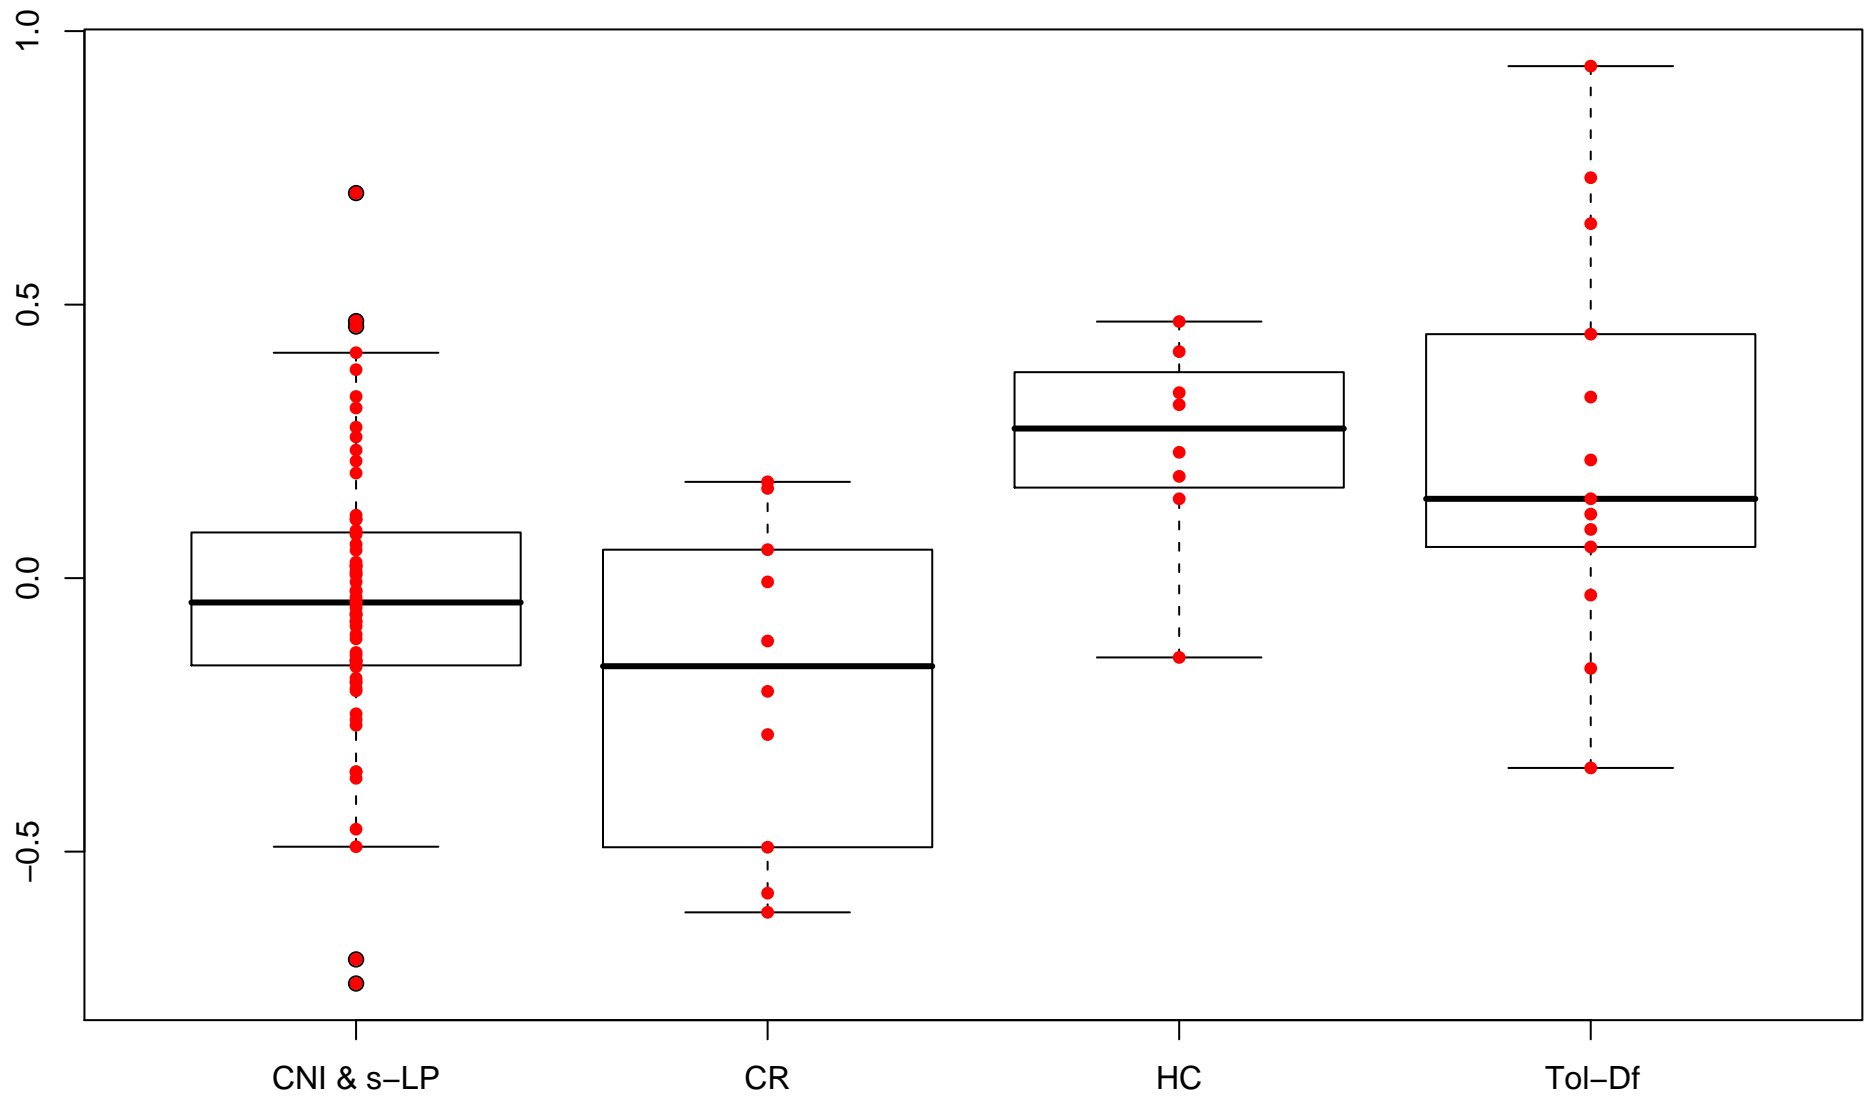

Rank 192 : AQP9  
0.0005635

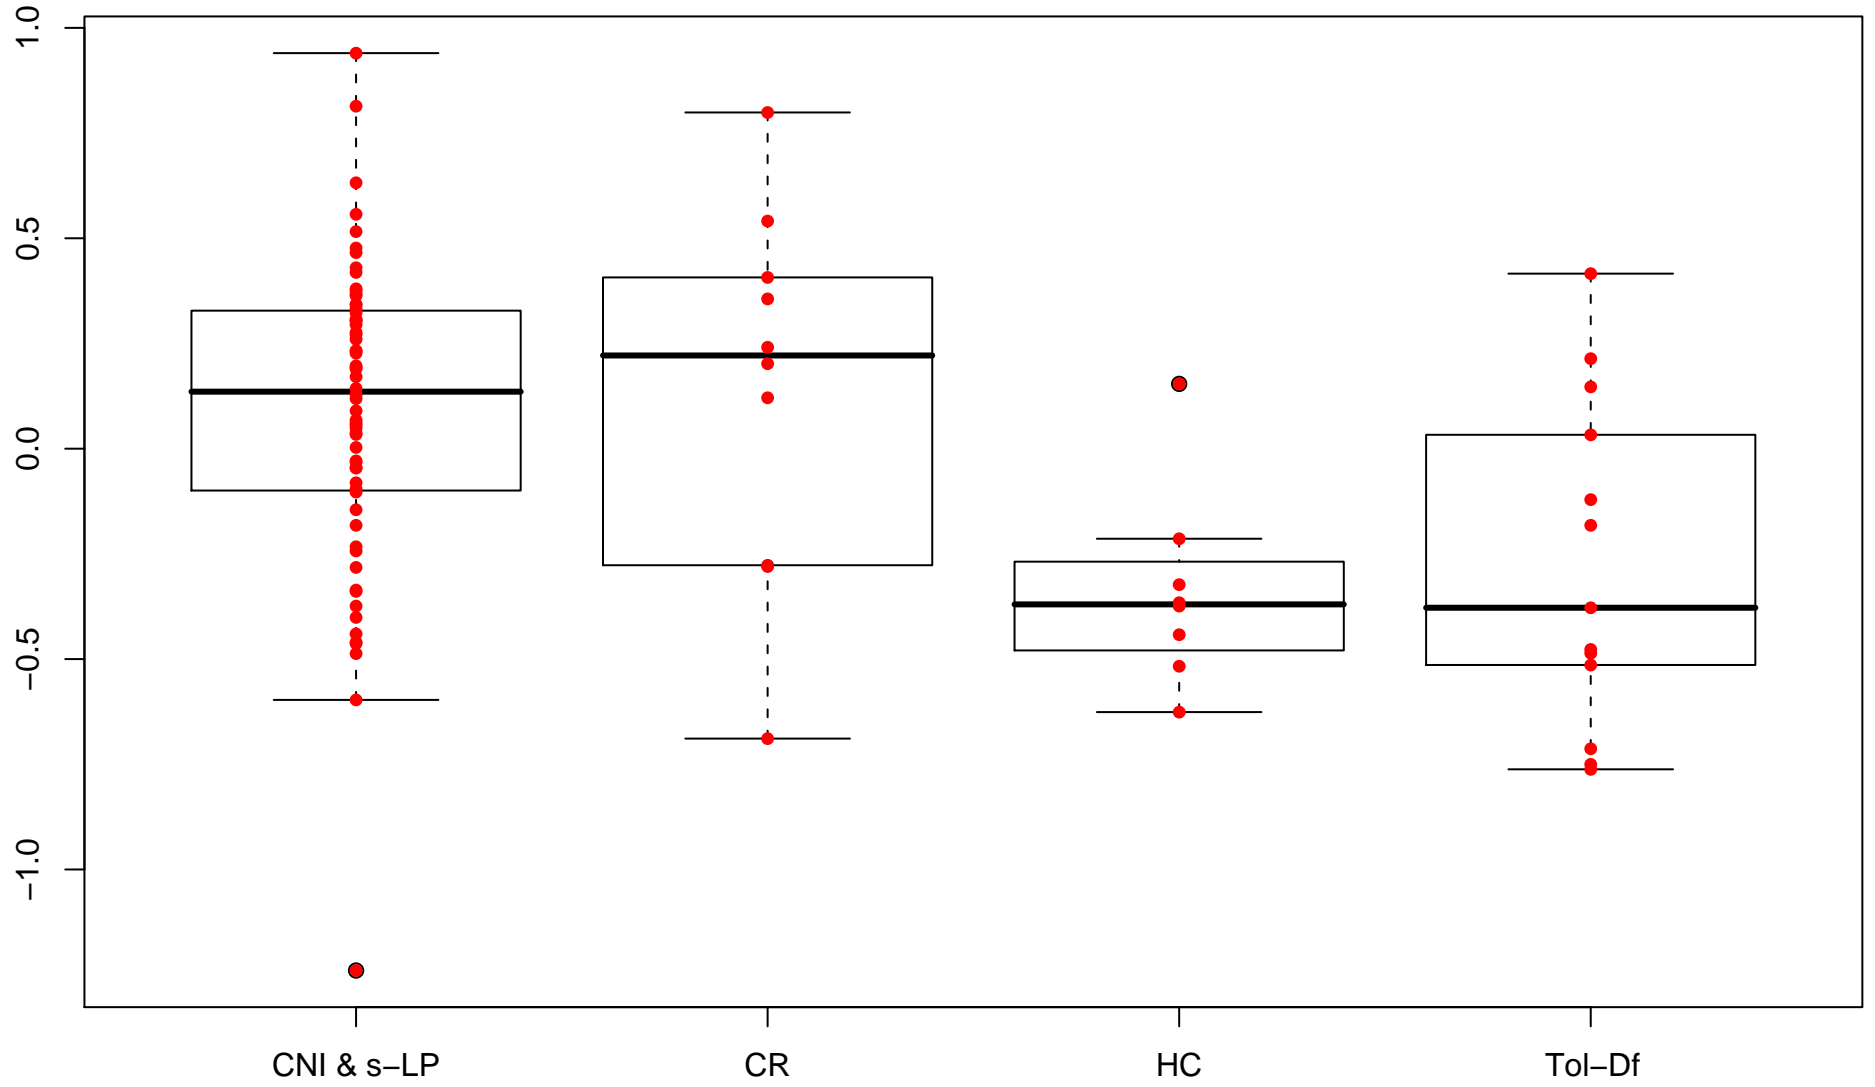

Rank 193 : ZNF655  
0.0005743

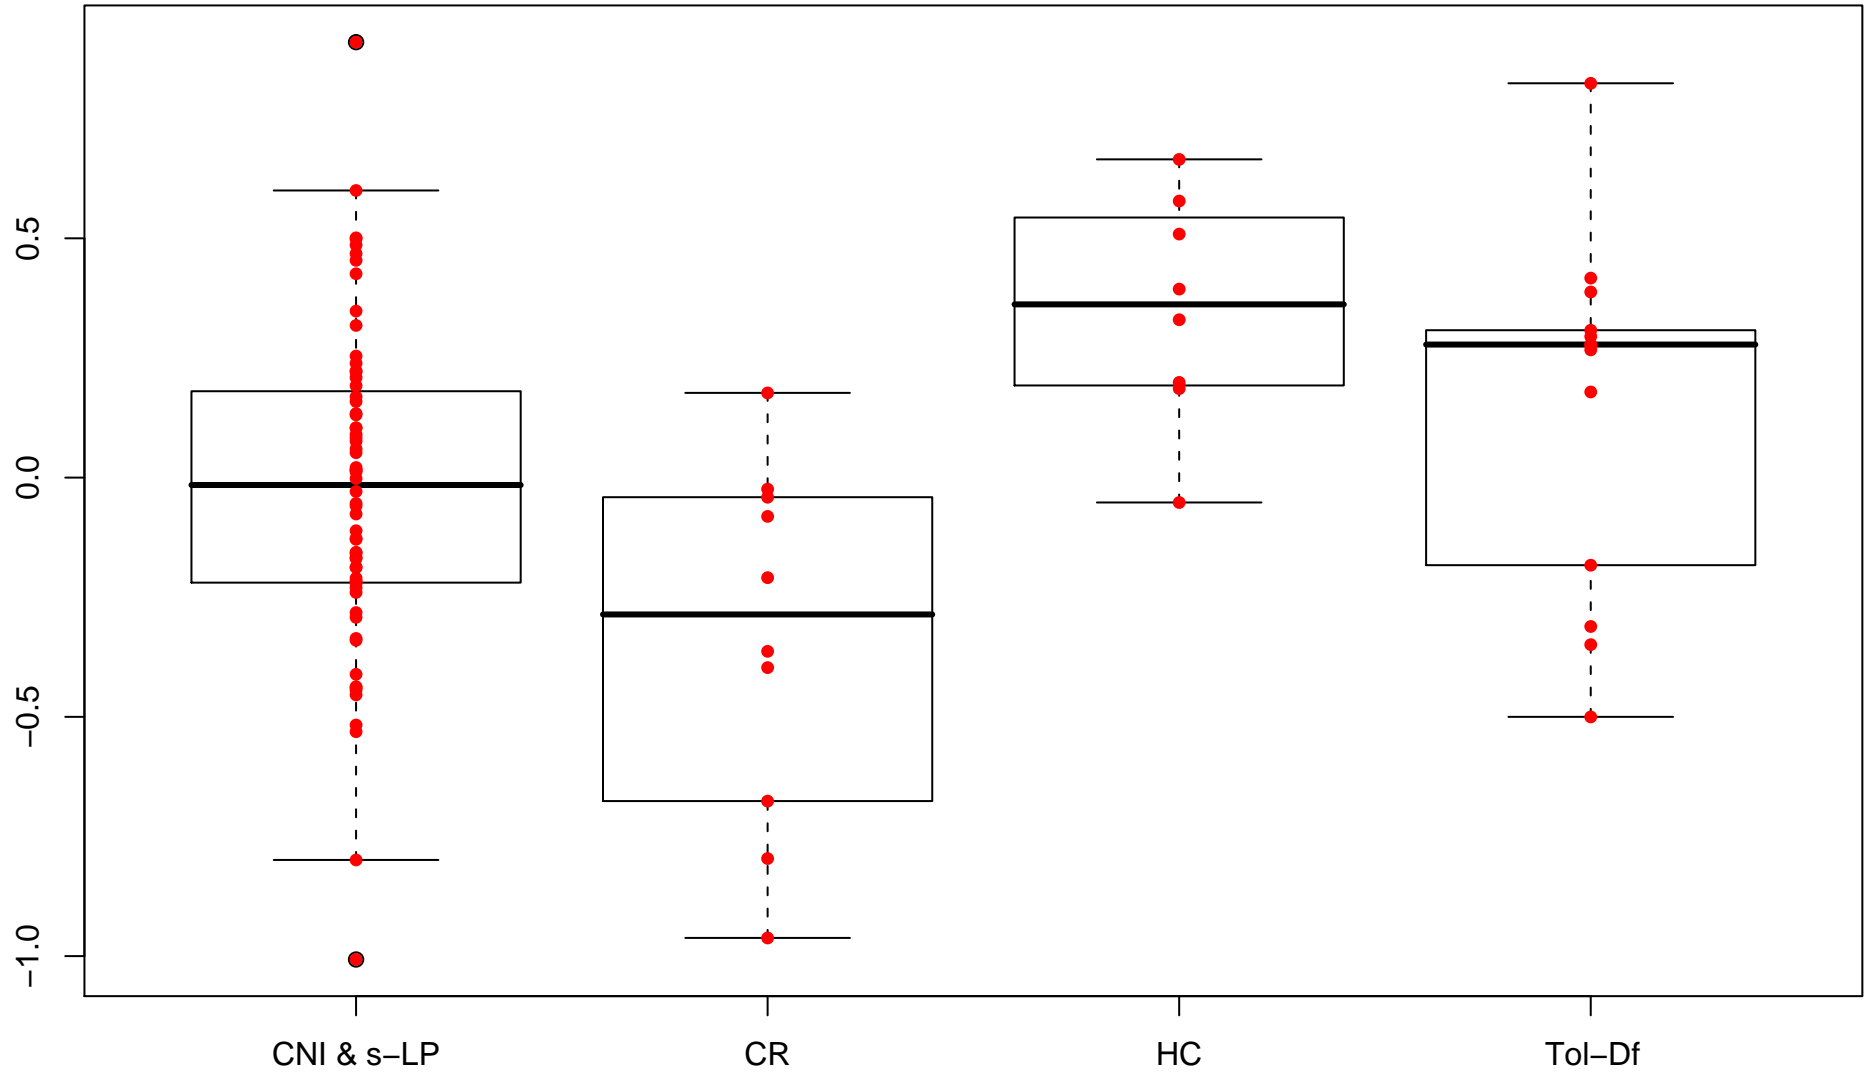

Rank 194 : UPB1  
0.0005839

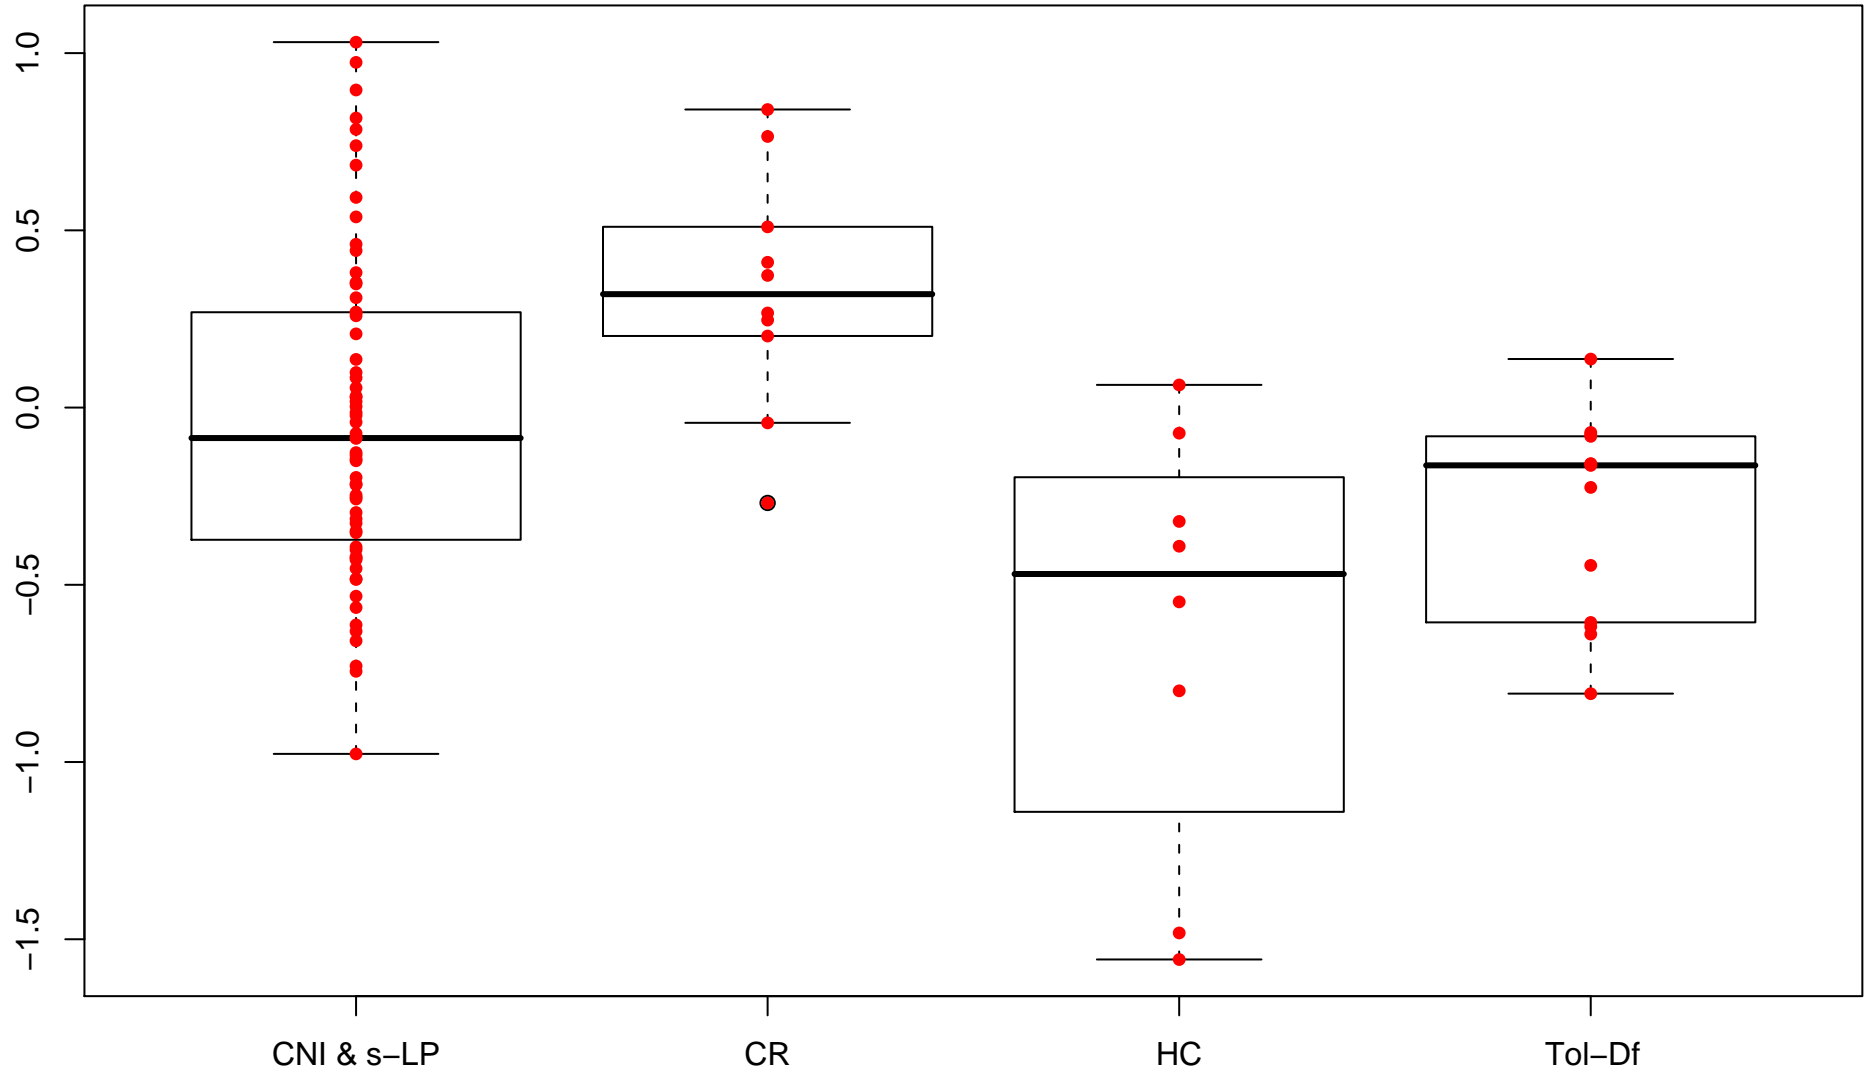



Rank 195 : RNASE2  
0.0005867

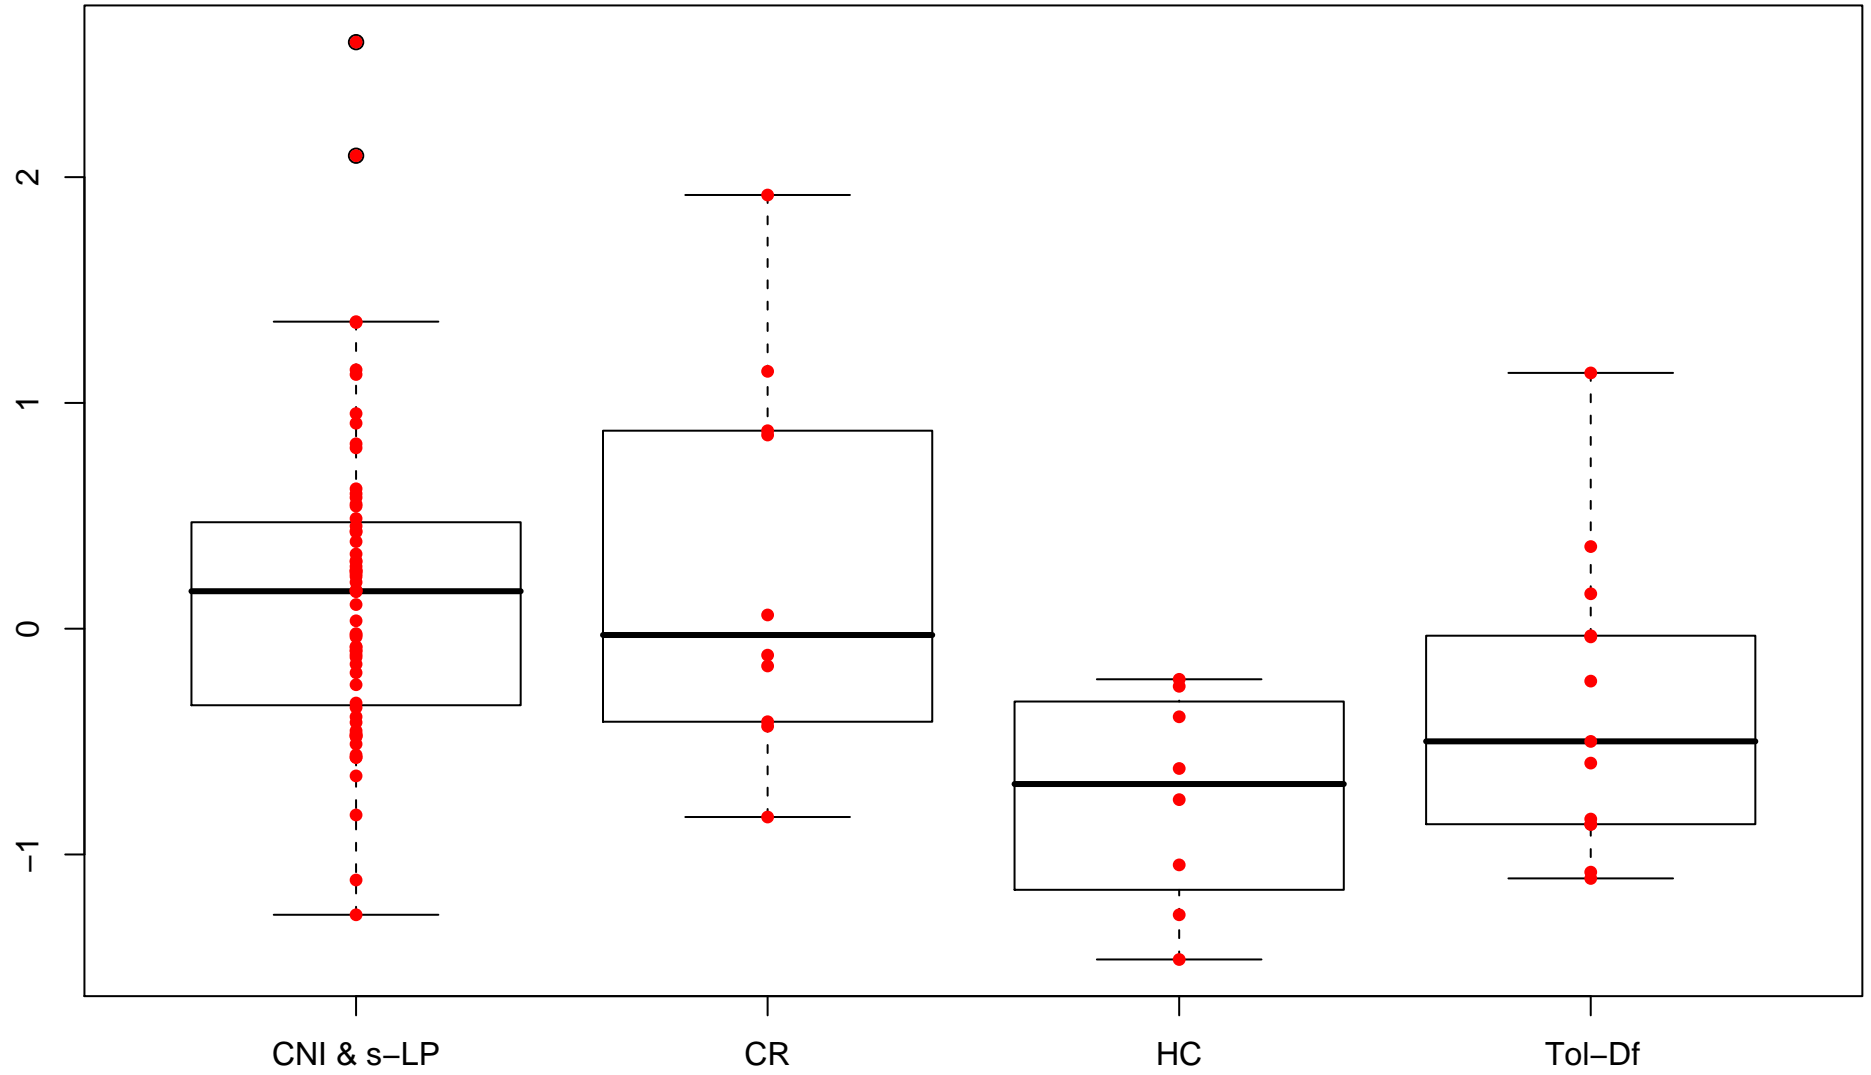

Rank 196 : MAP2K6  
0.0005947

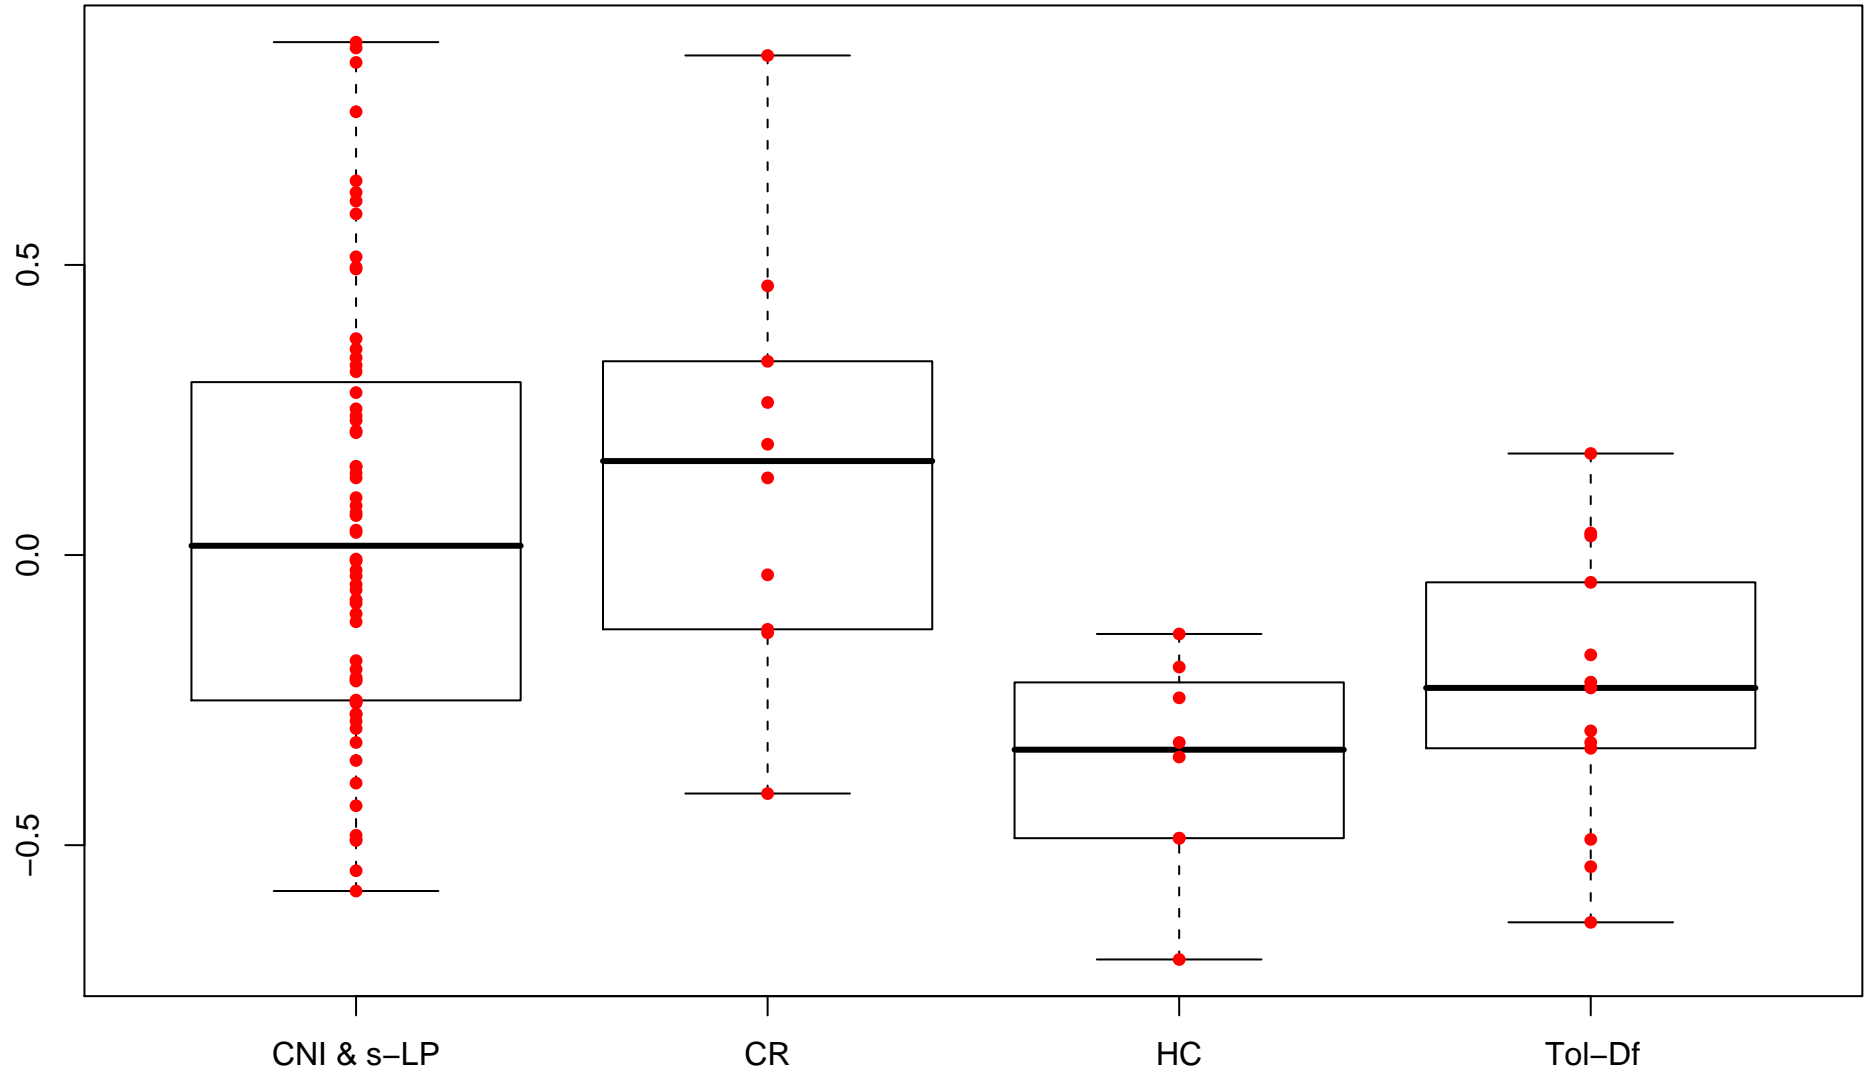

Rank 197 : CHST2  
0.0006037

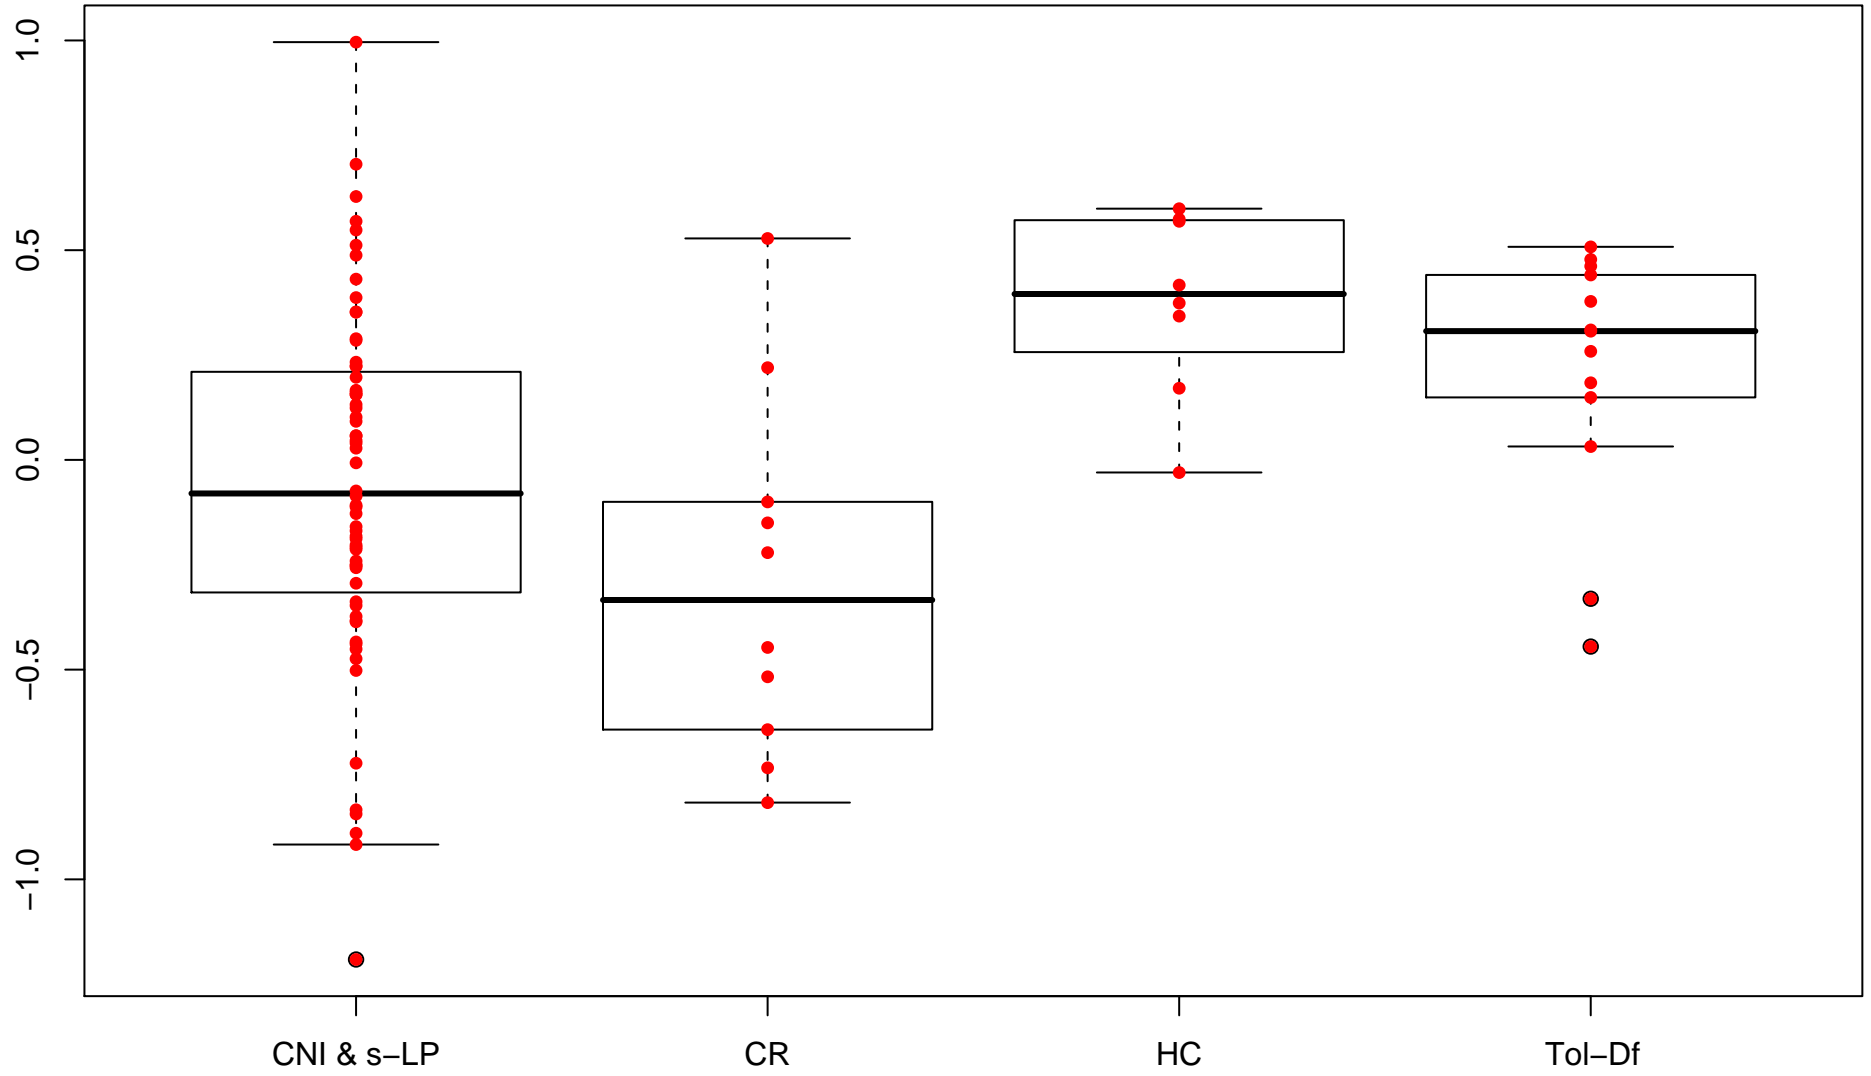

Rank 198 : LYRM7  
0.0006079

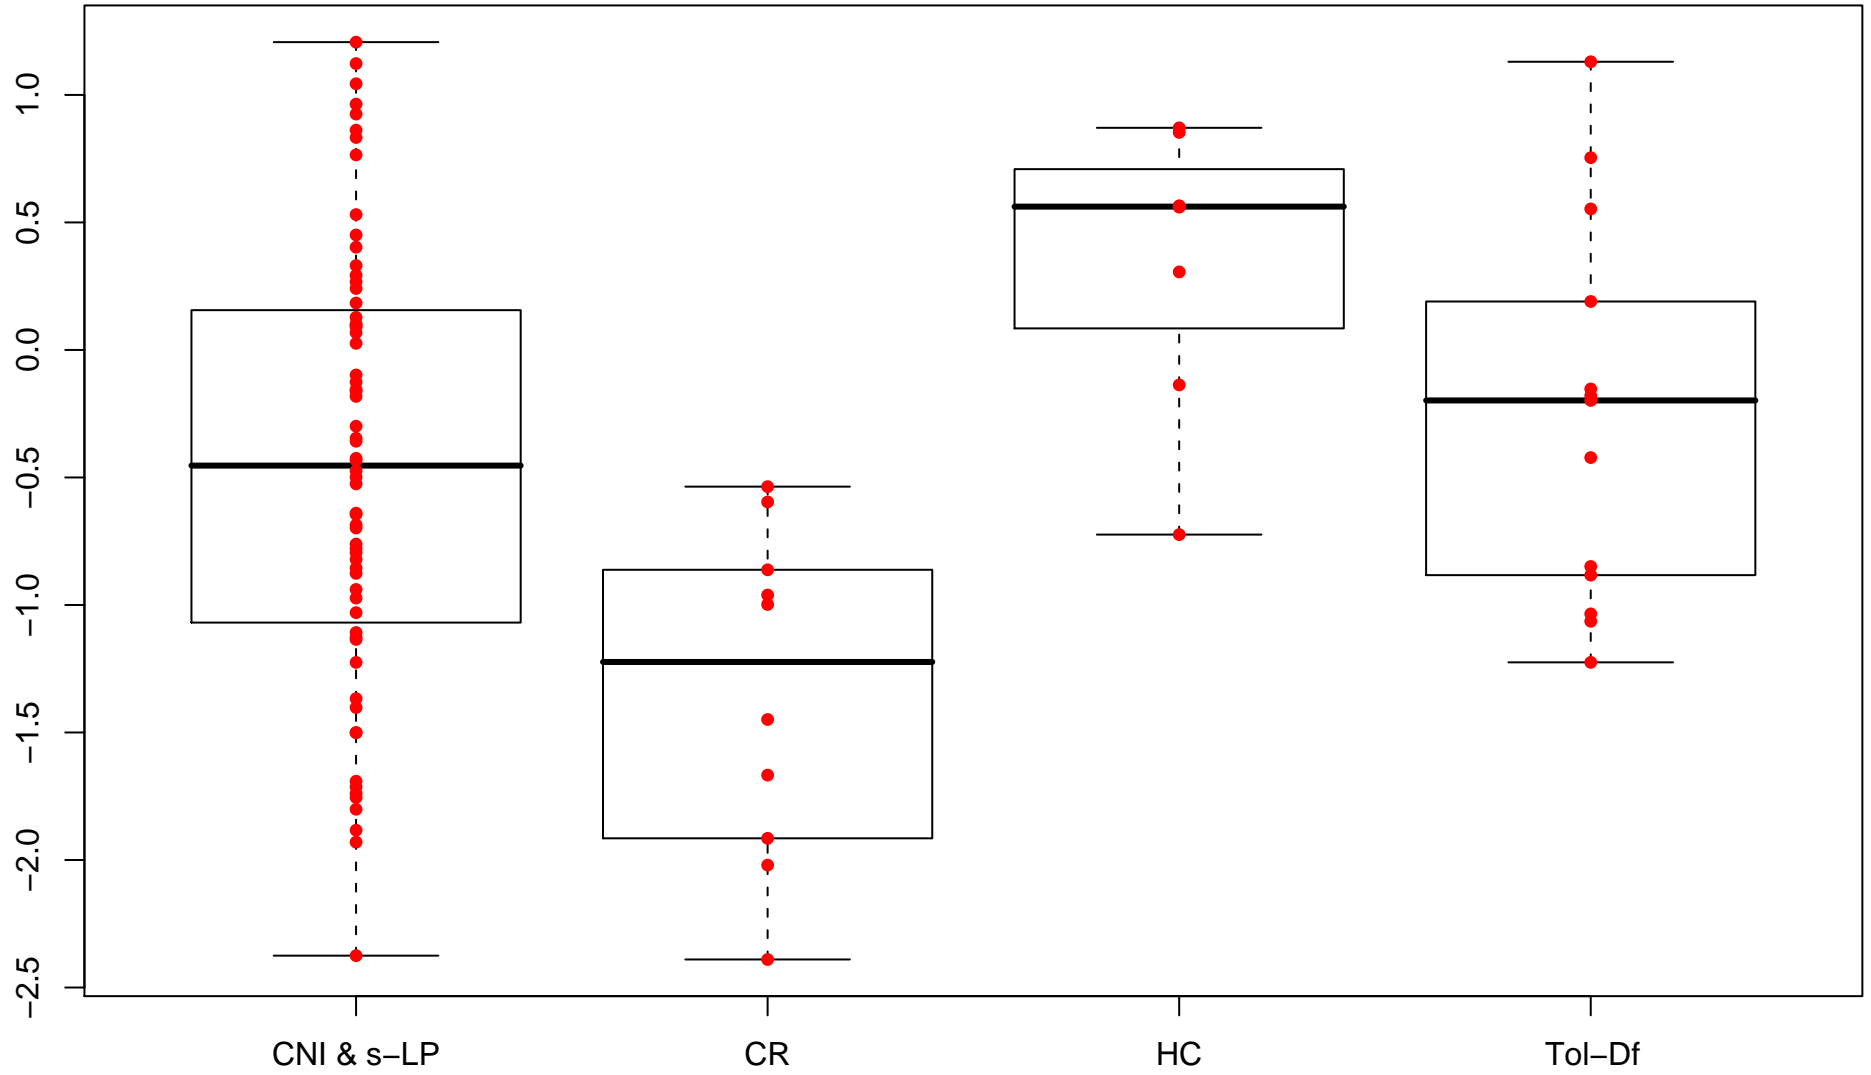

Rank 199 : AK124263  
0.0006098

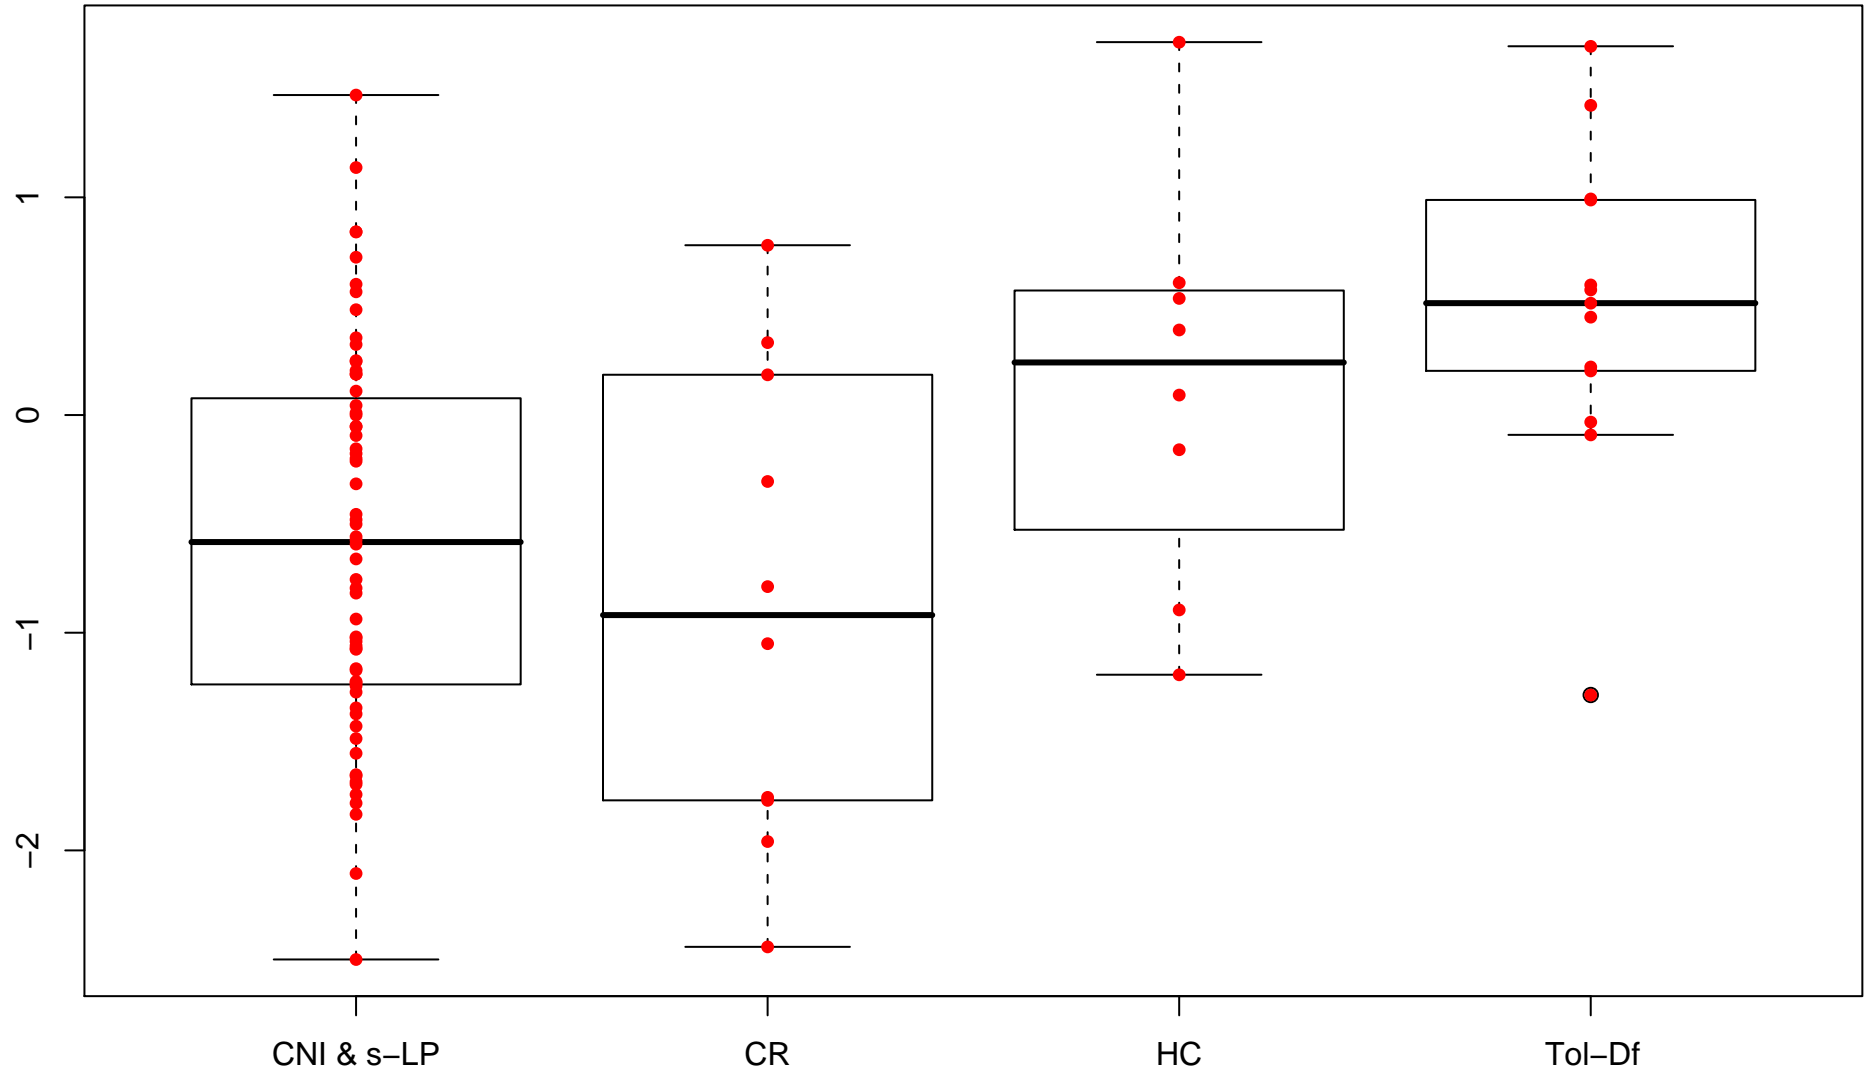

Rank 200 : MYT1;PCMTD2  
0.0006132

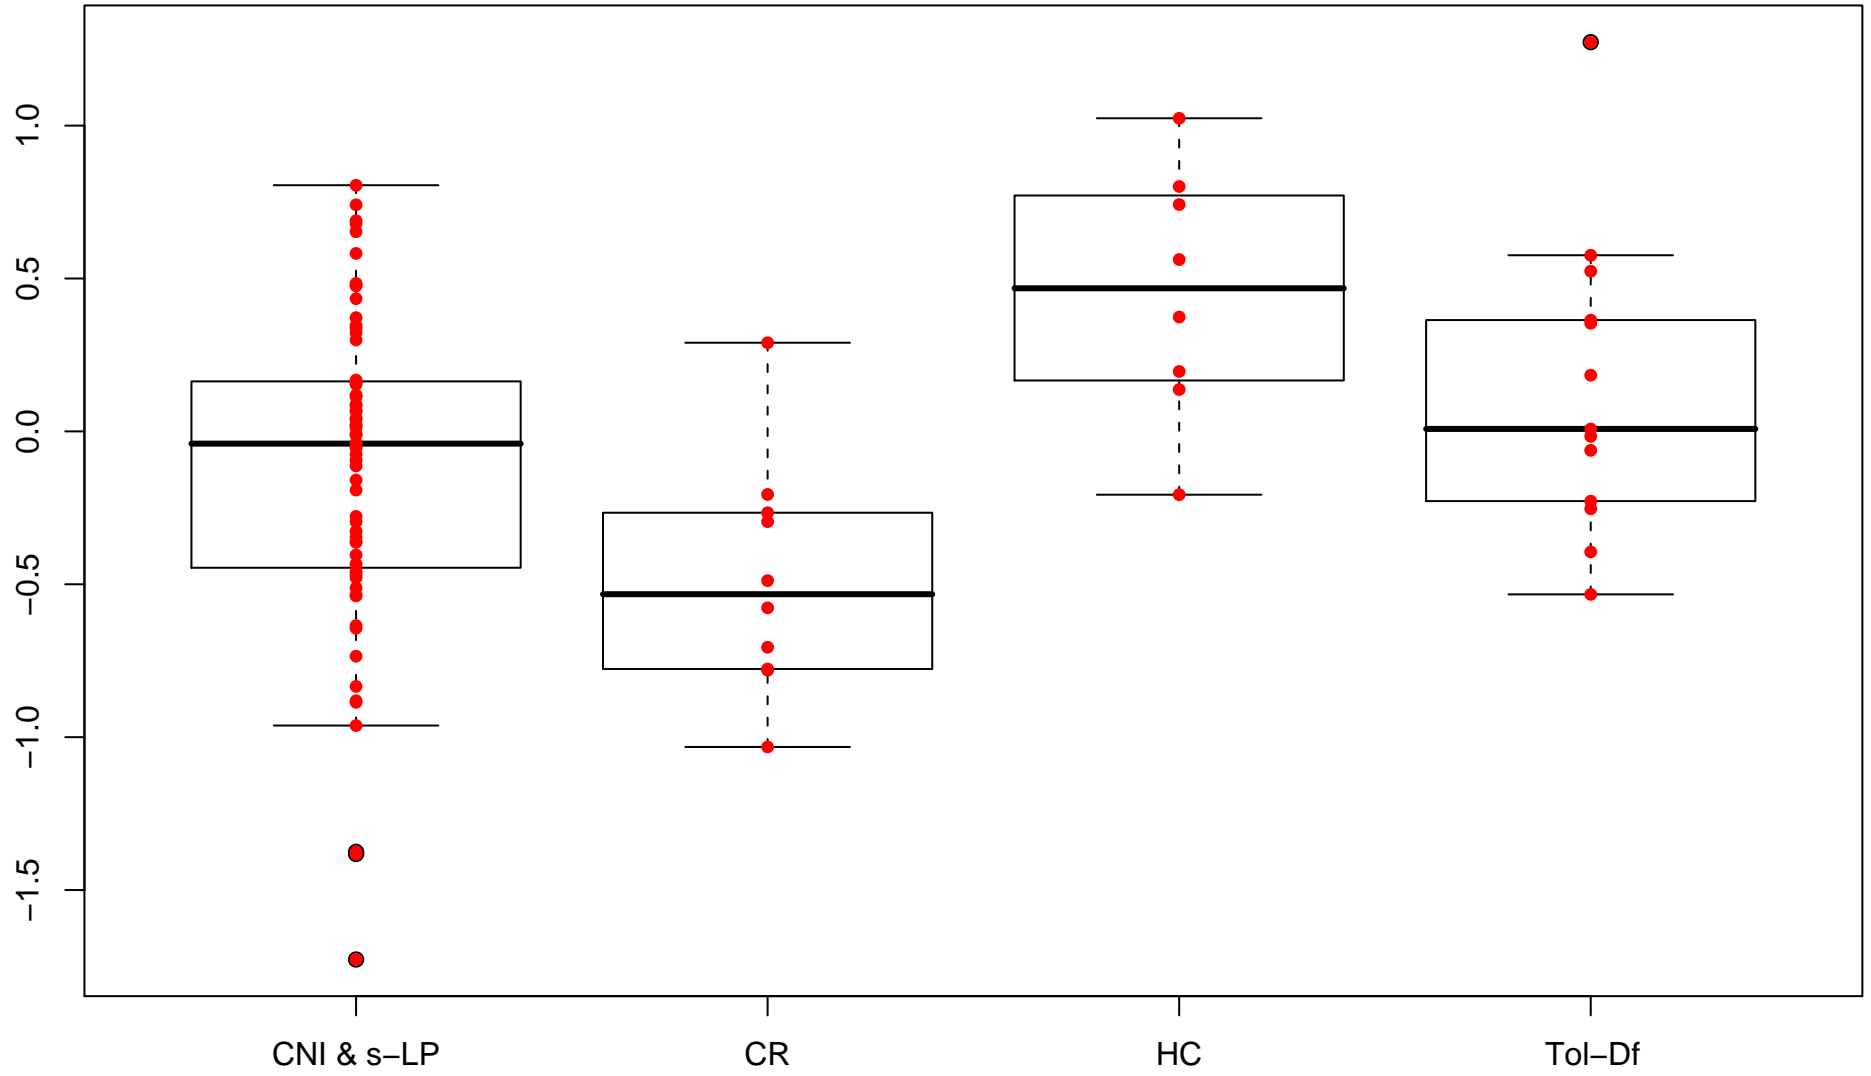

Rank 201 : CD96  
0.0006216

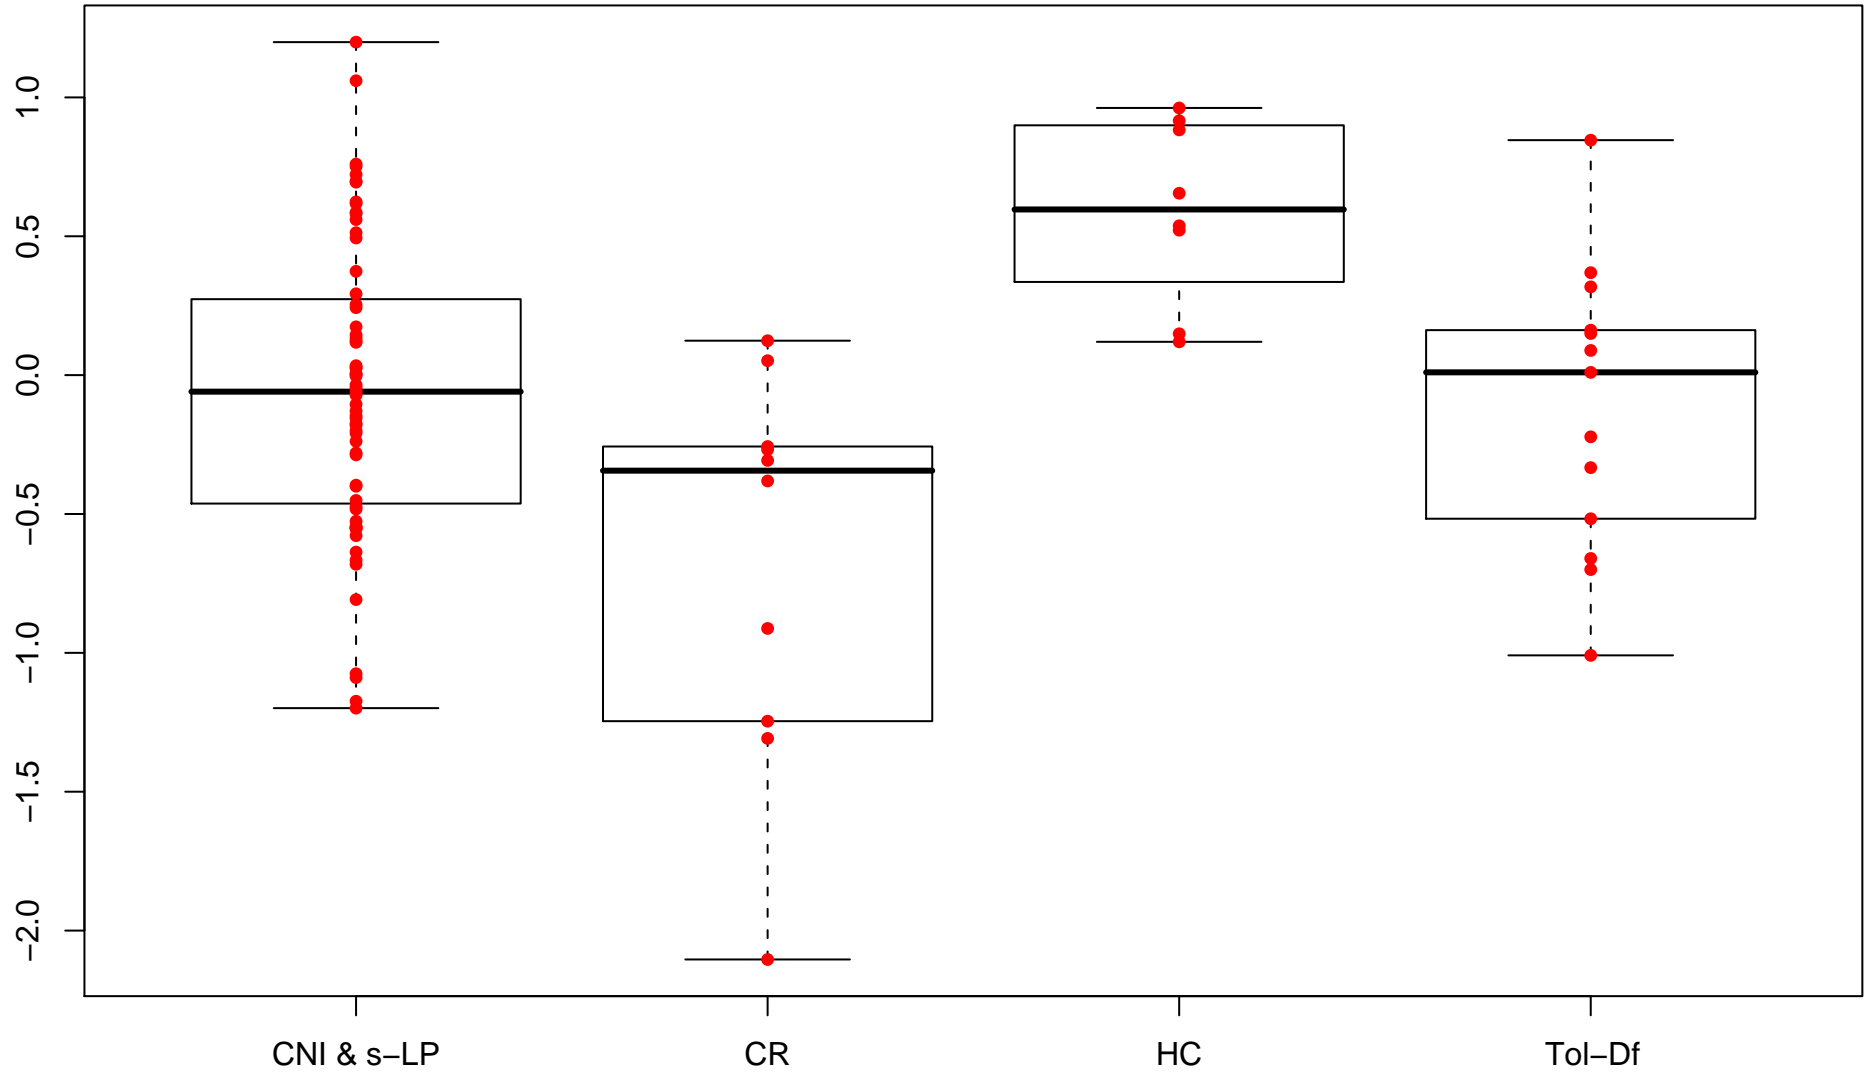

Rank 202 : IRF2  
0.00063

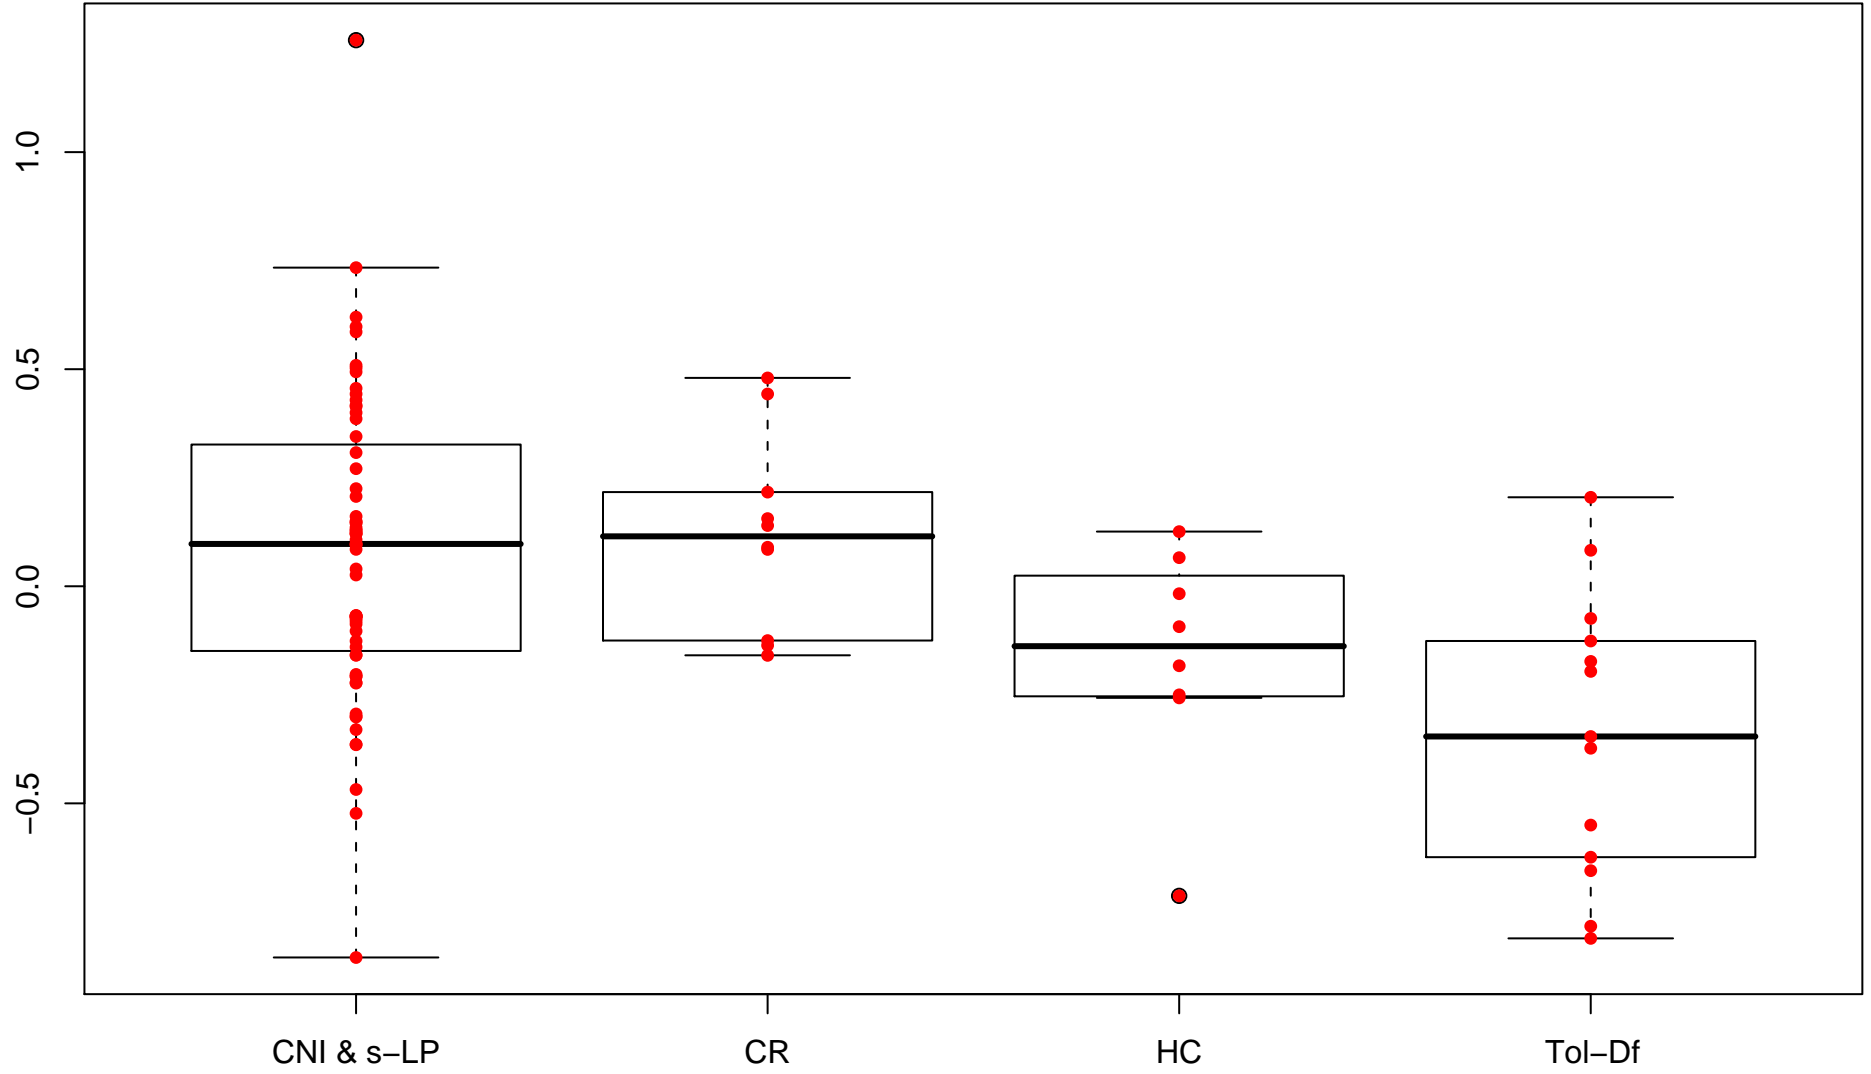



Rank 203 : PCGF6  
0.0006301

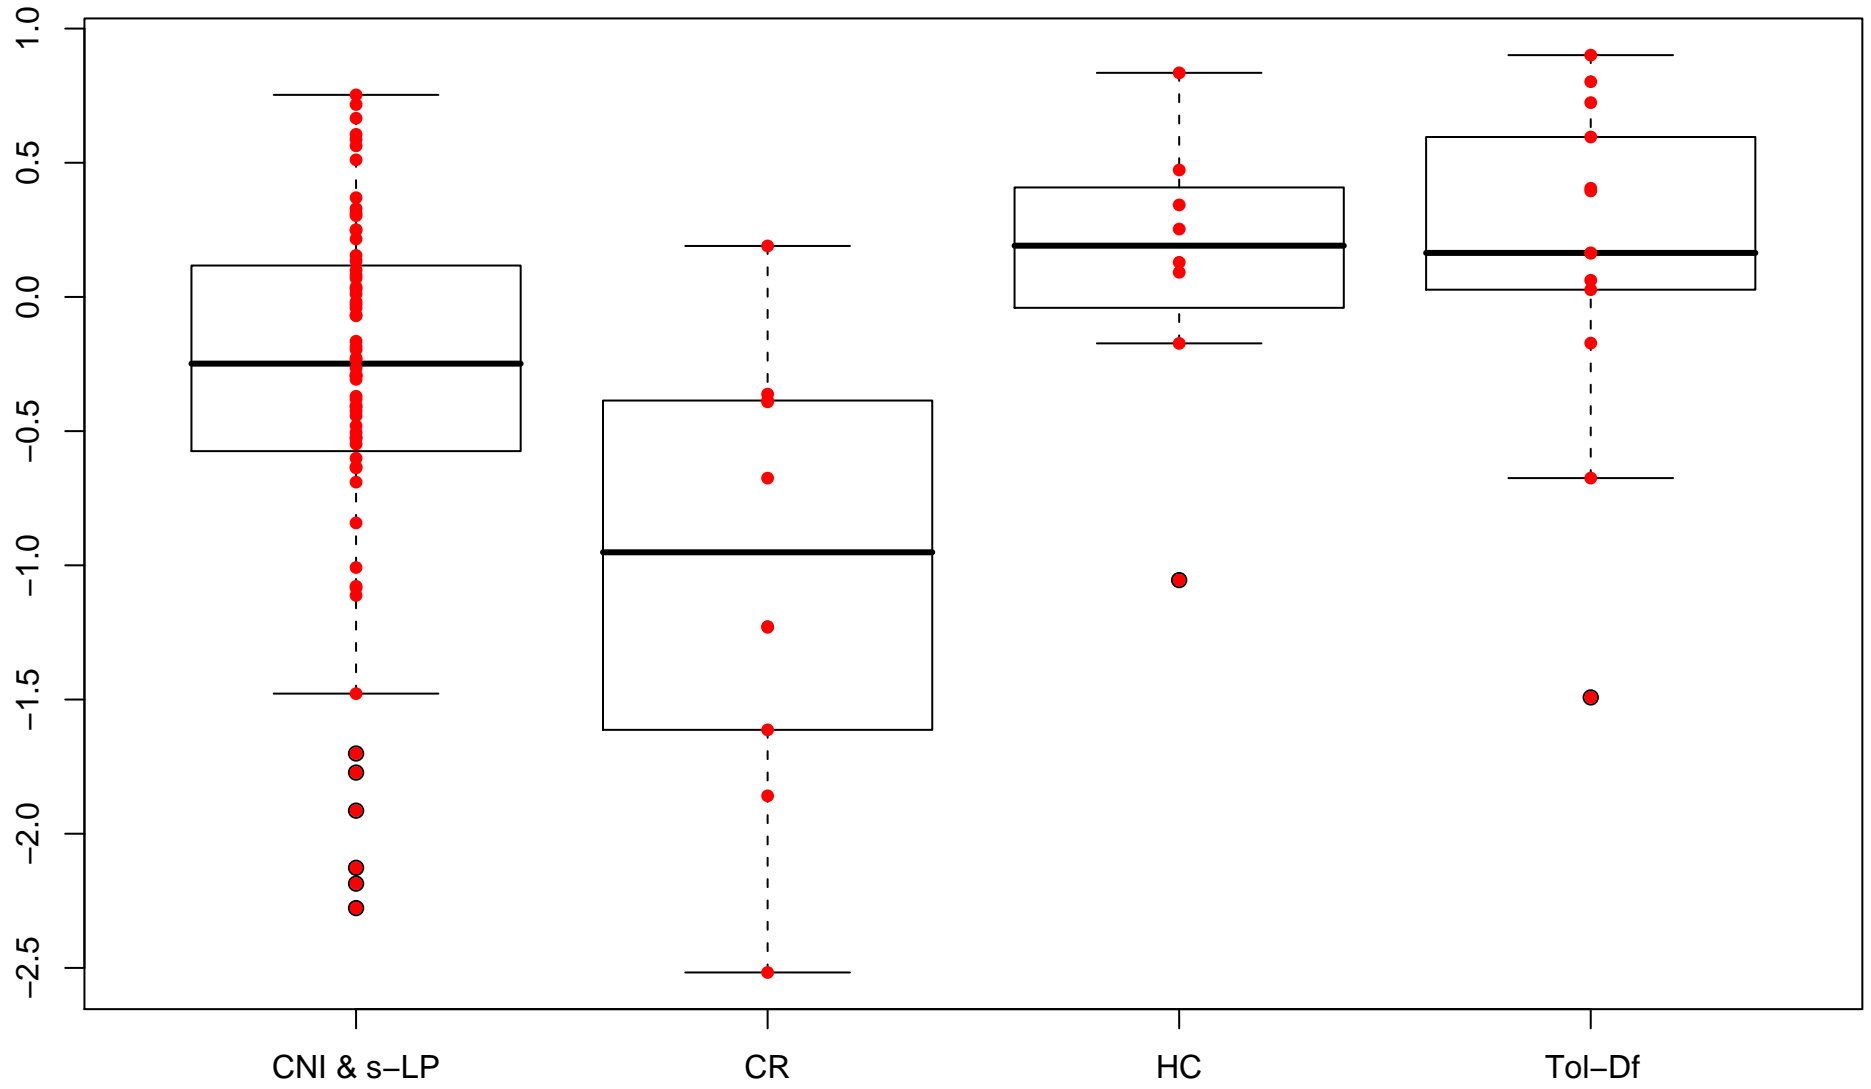

Rank 204 : IGKV3-20  
0.0006323

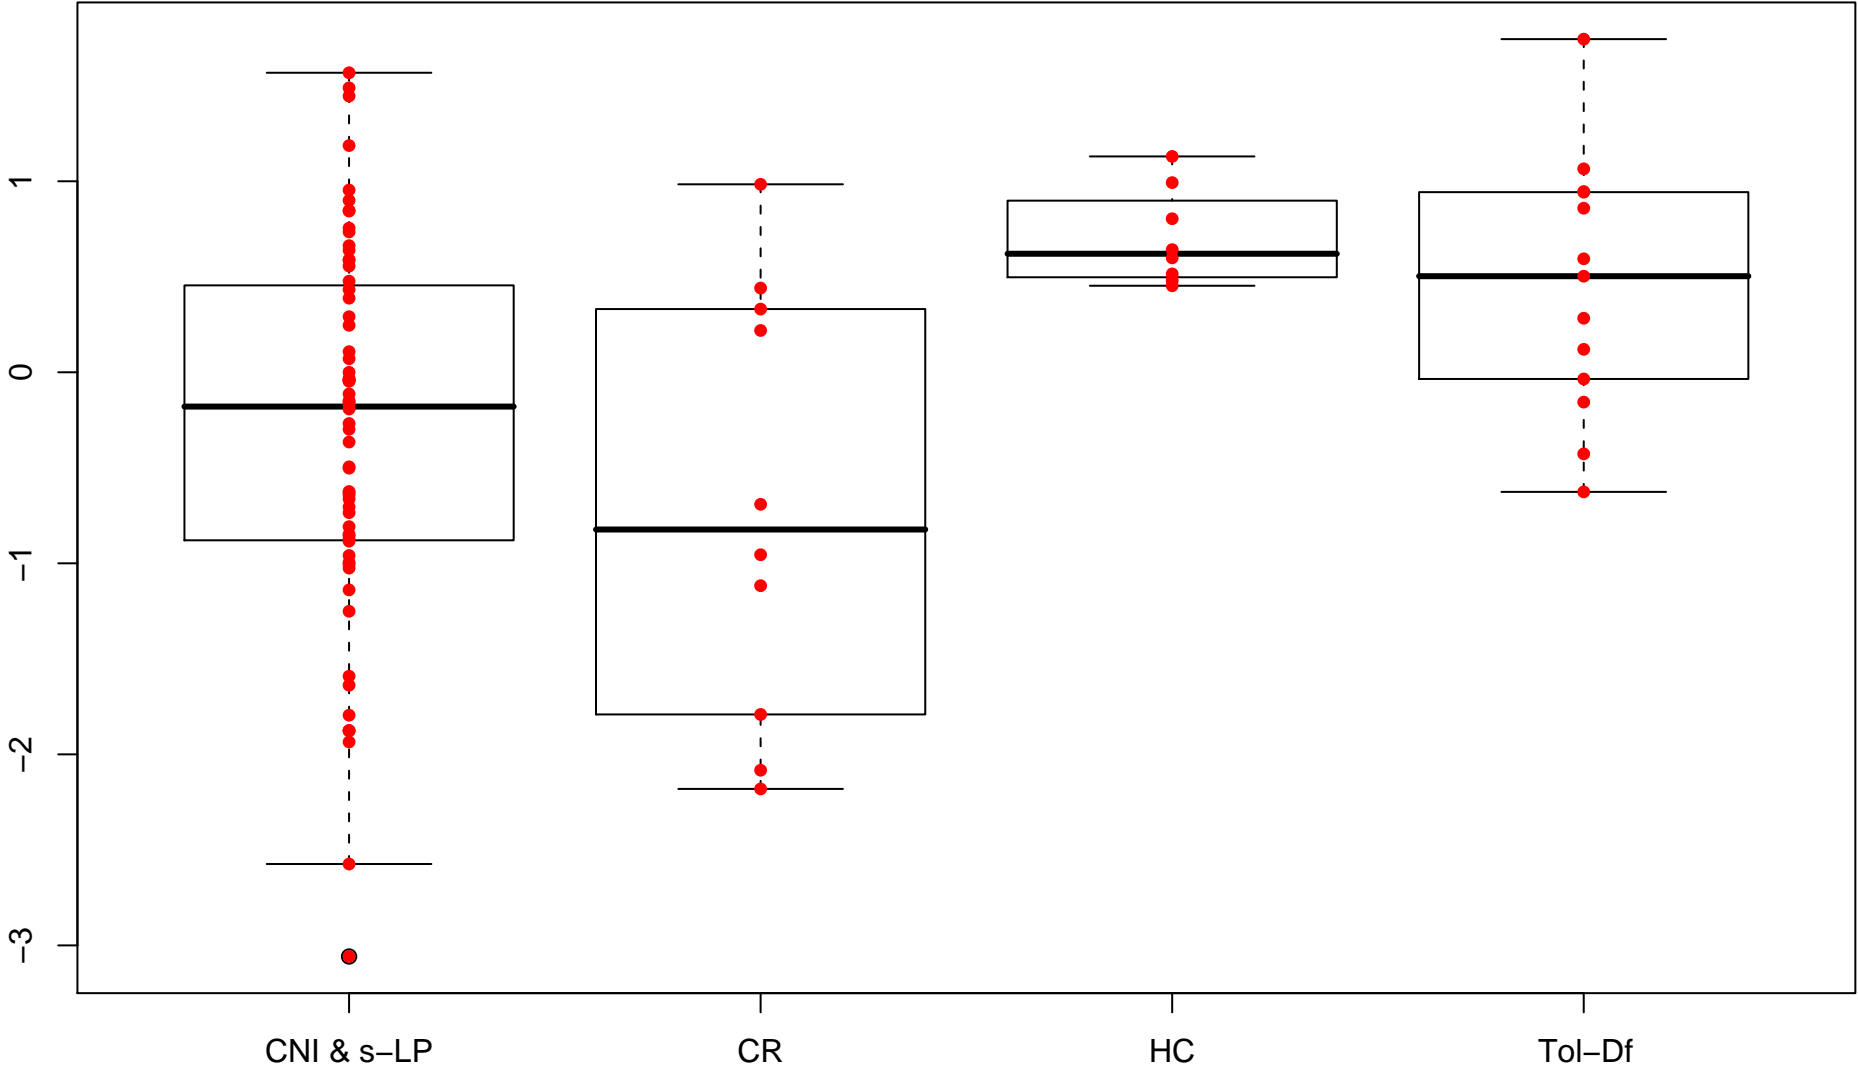

Rank 205 : CARD11  
0.0006366

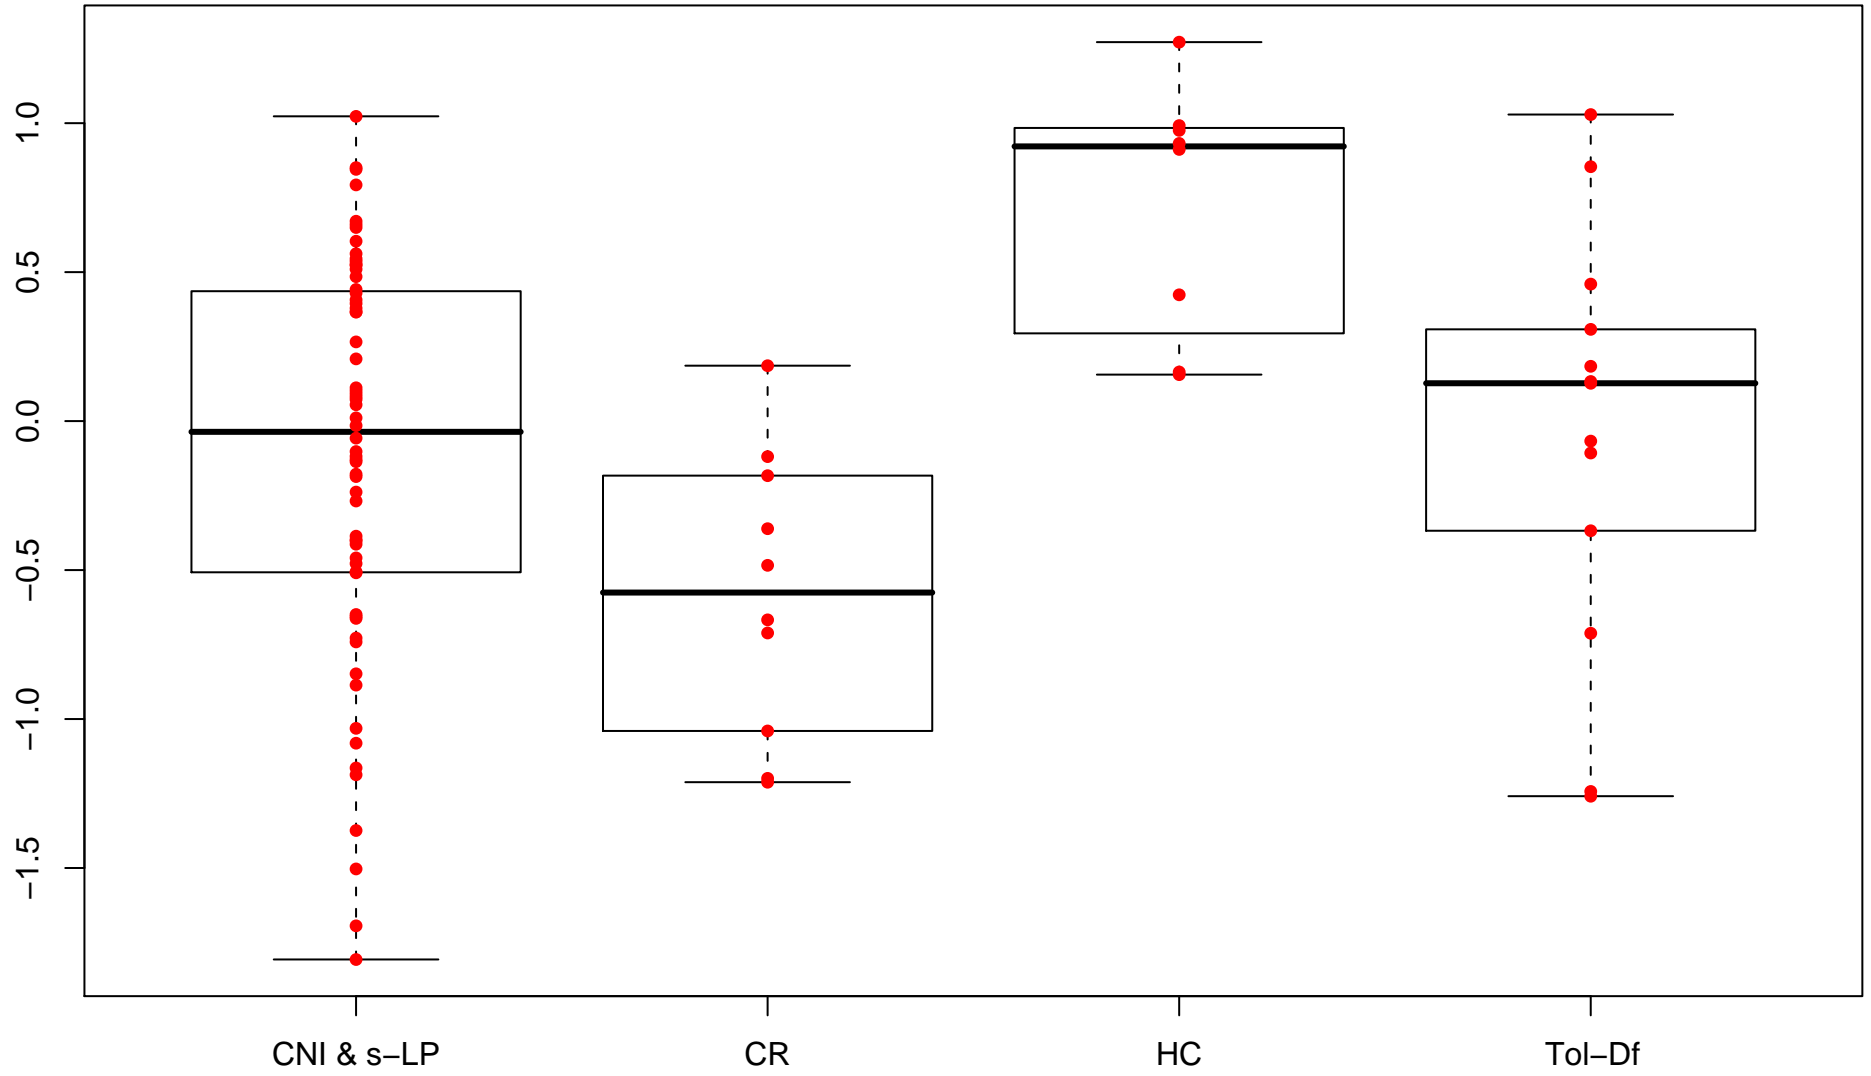

Rank 206 : IFT80  
0.0006494

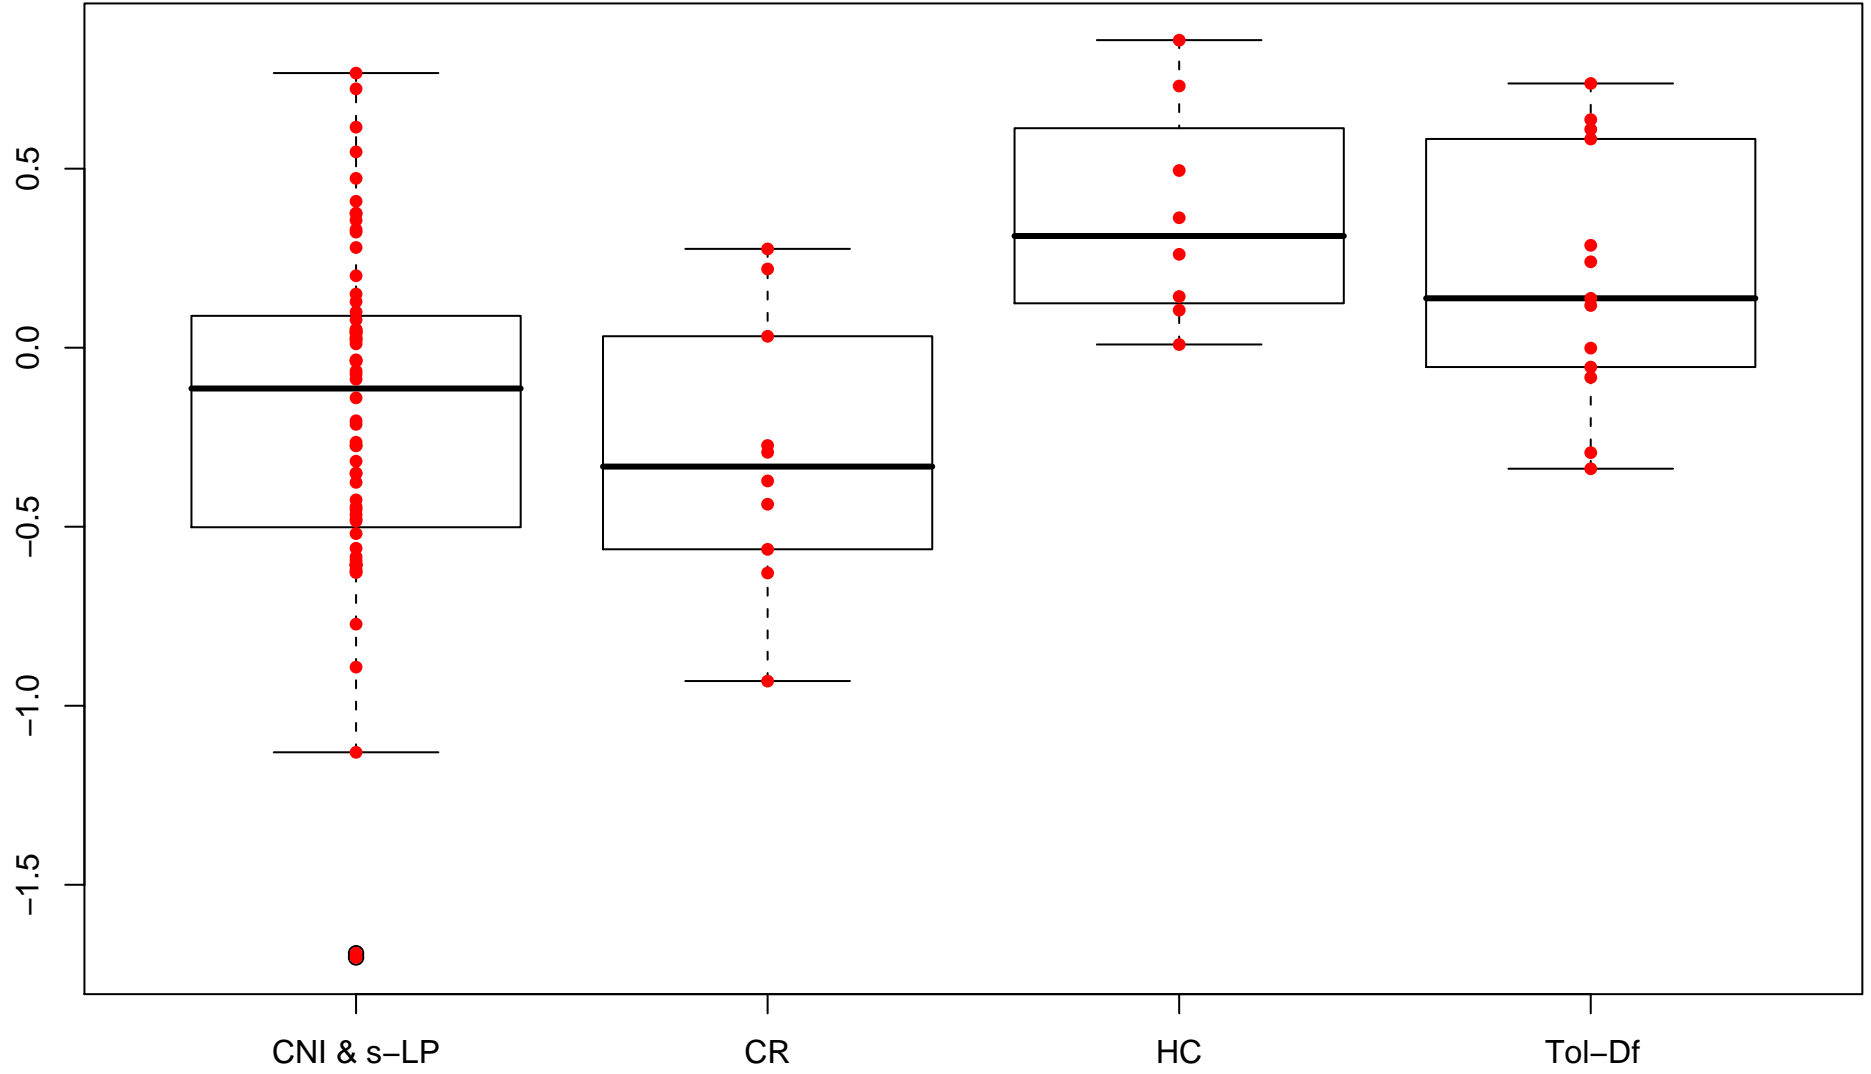

Rank 207 : SLAMF1  
0.0006616

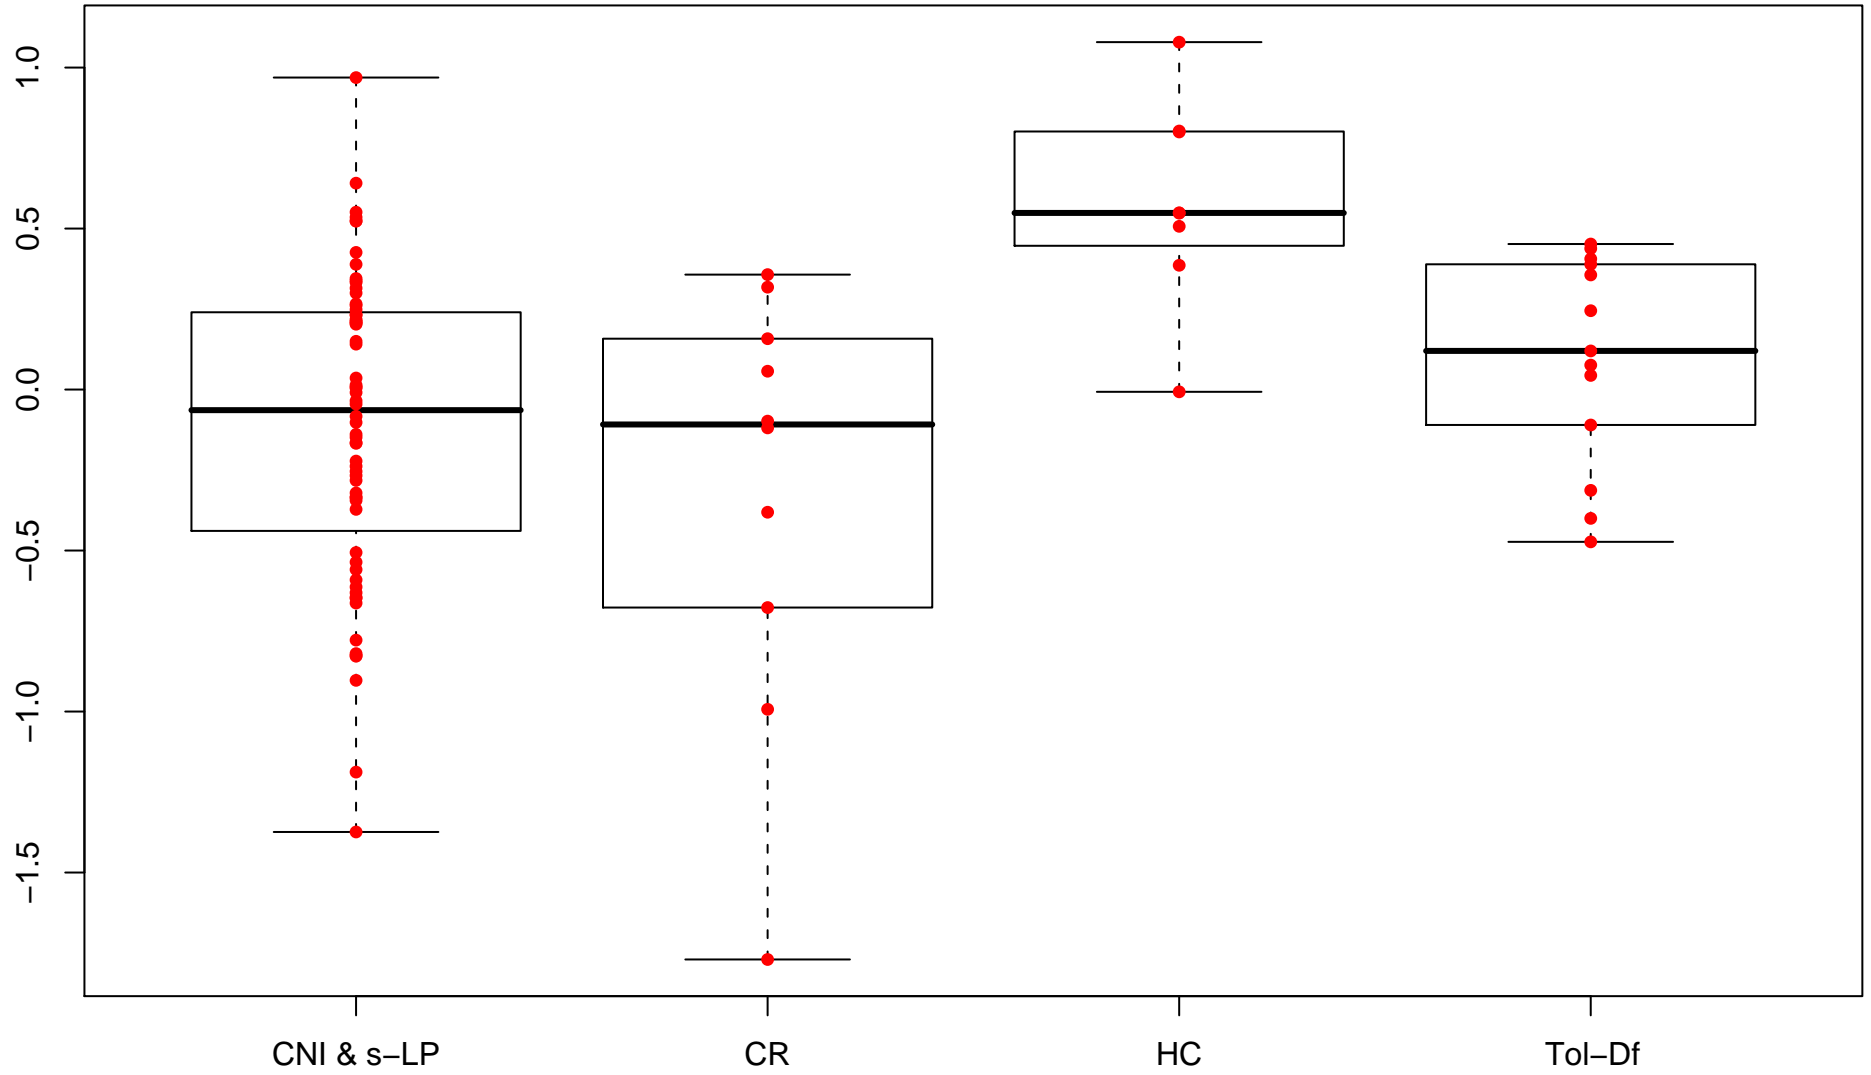

Rank 208 : SIP1  
0.00067

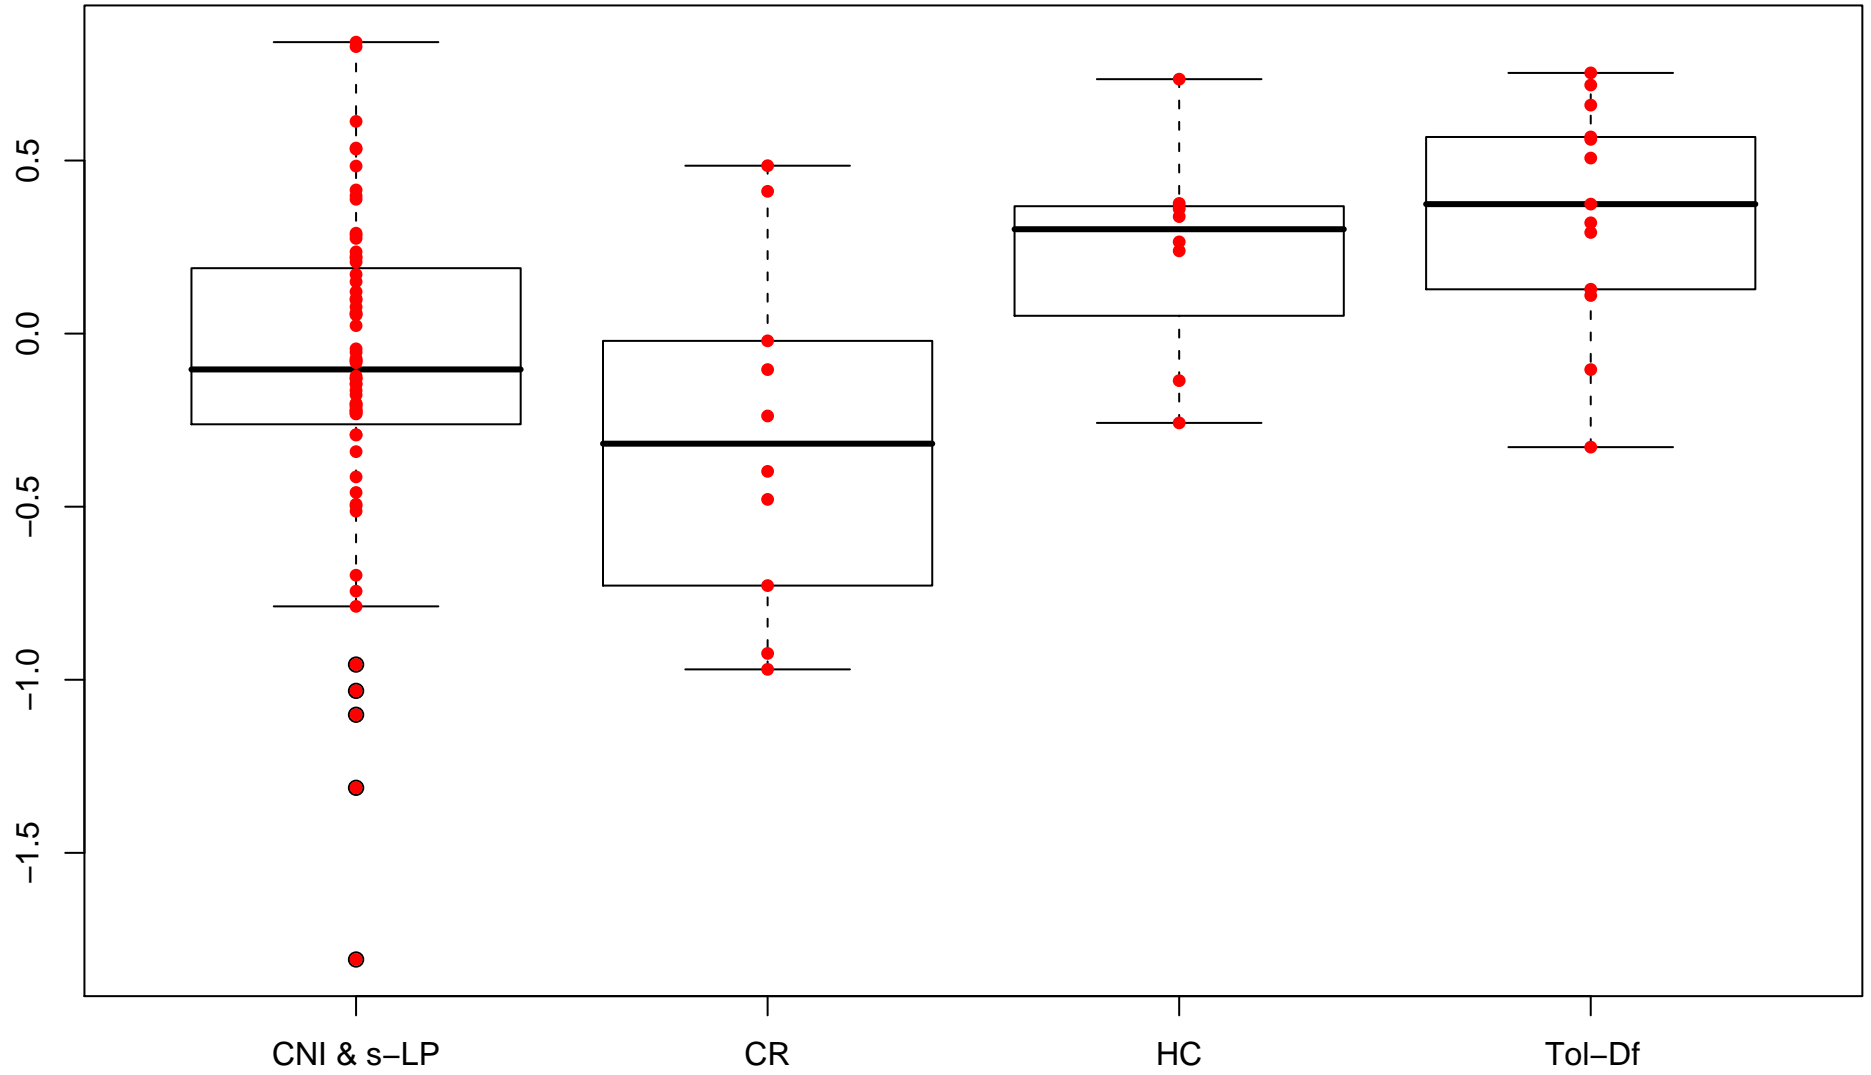

Rank 209 : FAIM  
0.0006737

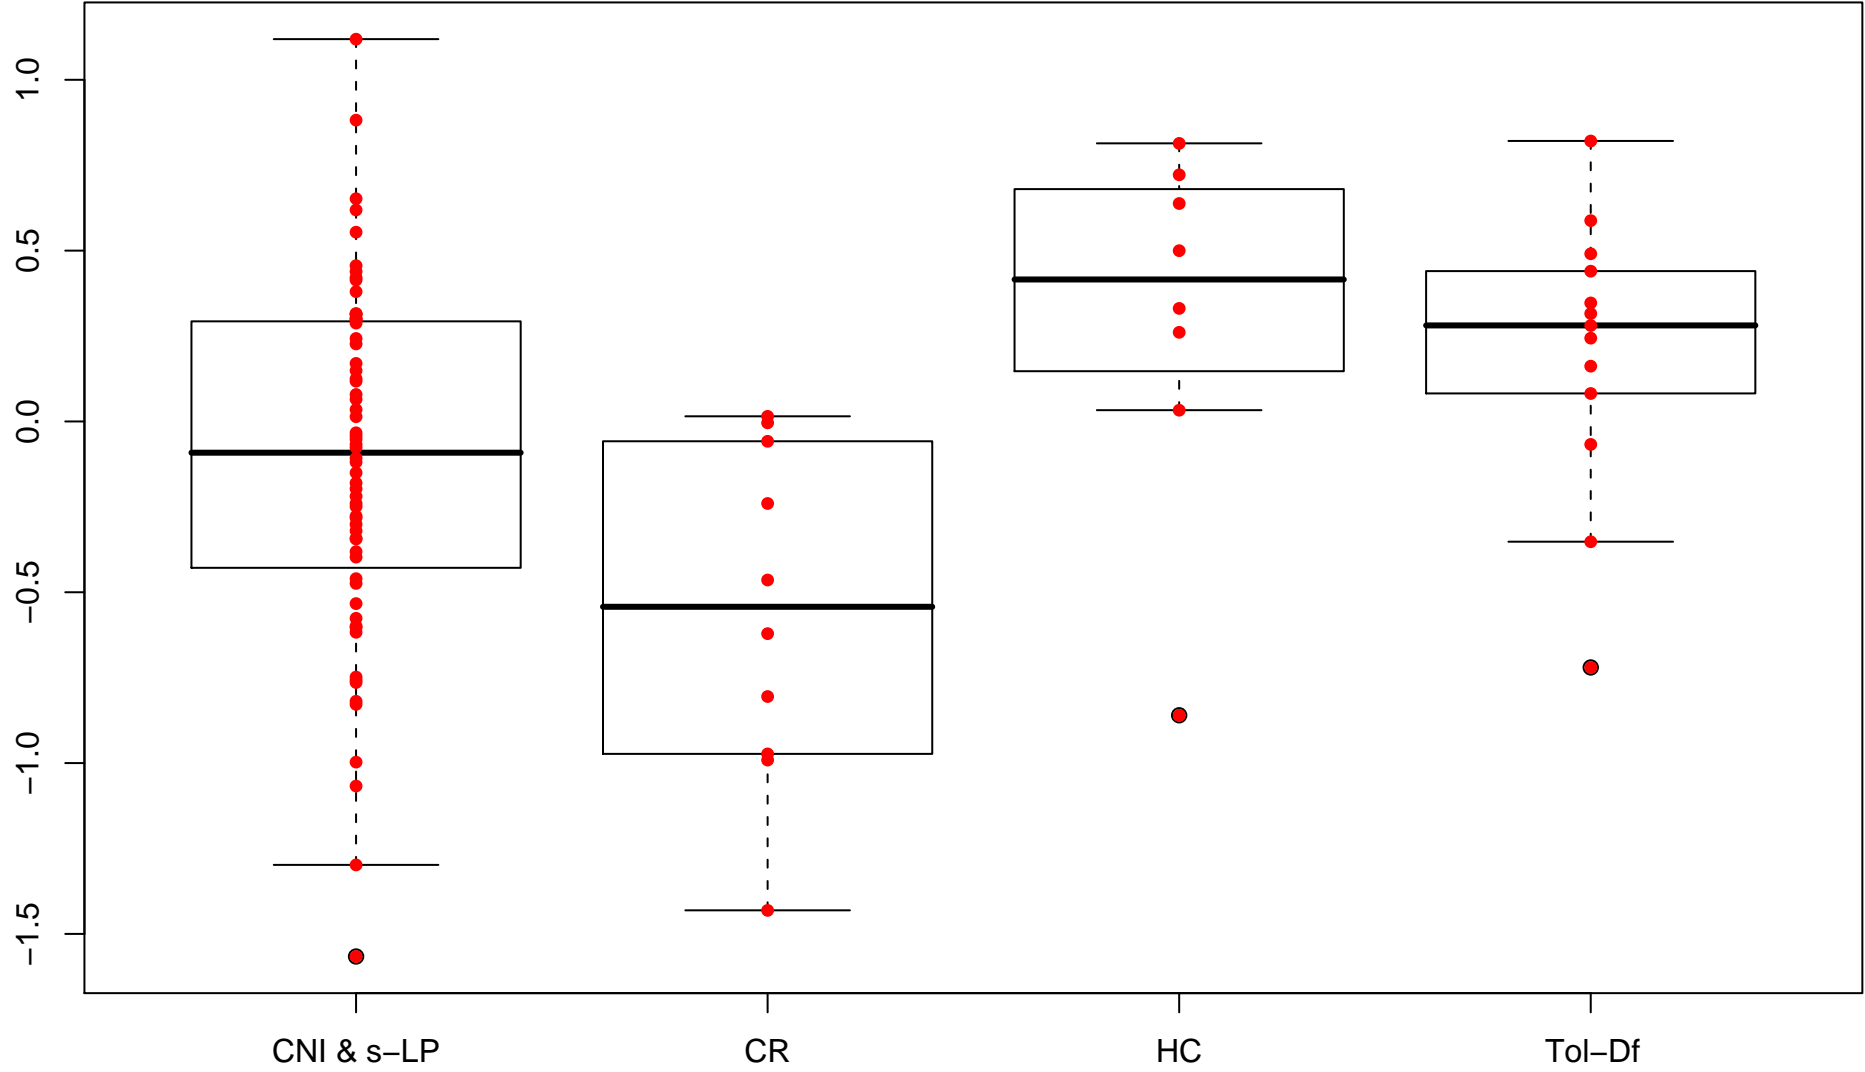

Rank 210 : NEK1  
0.0006753

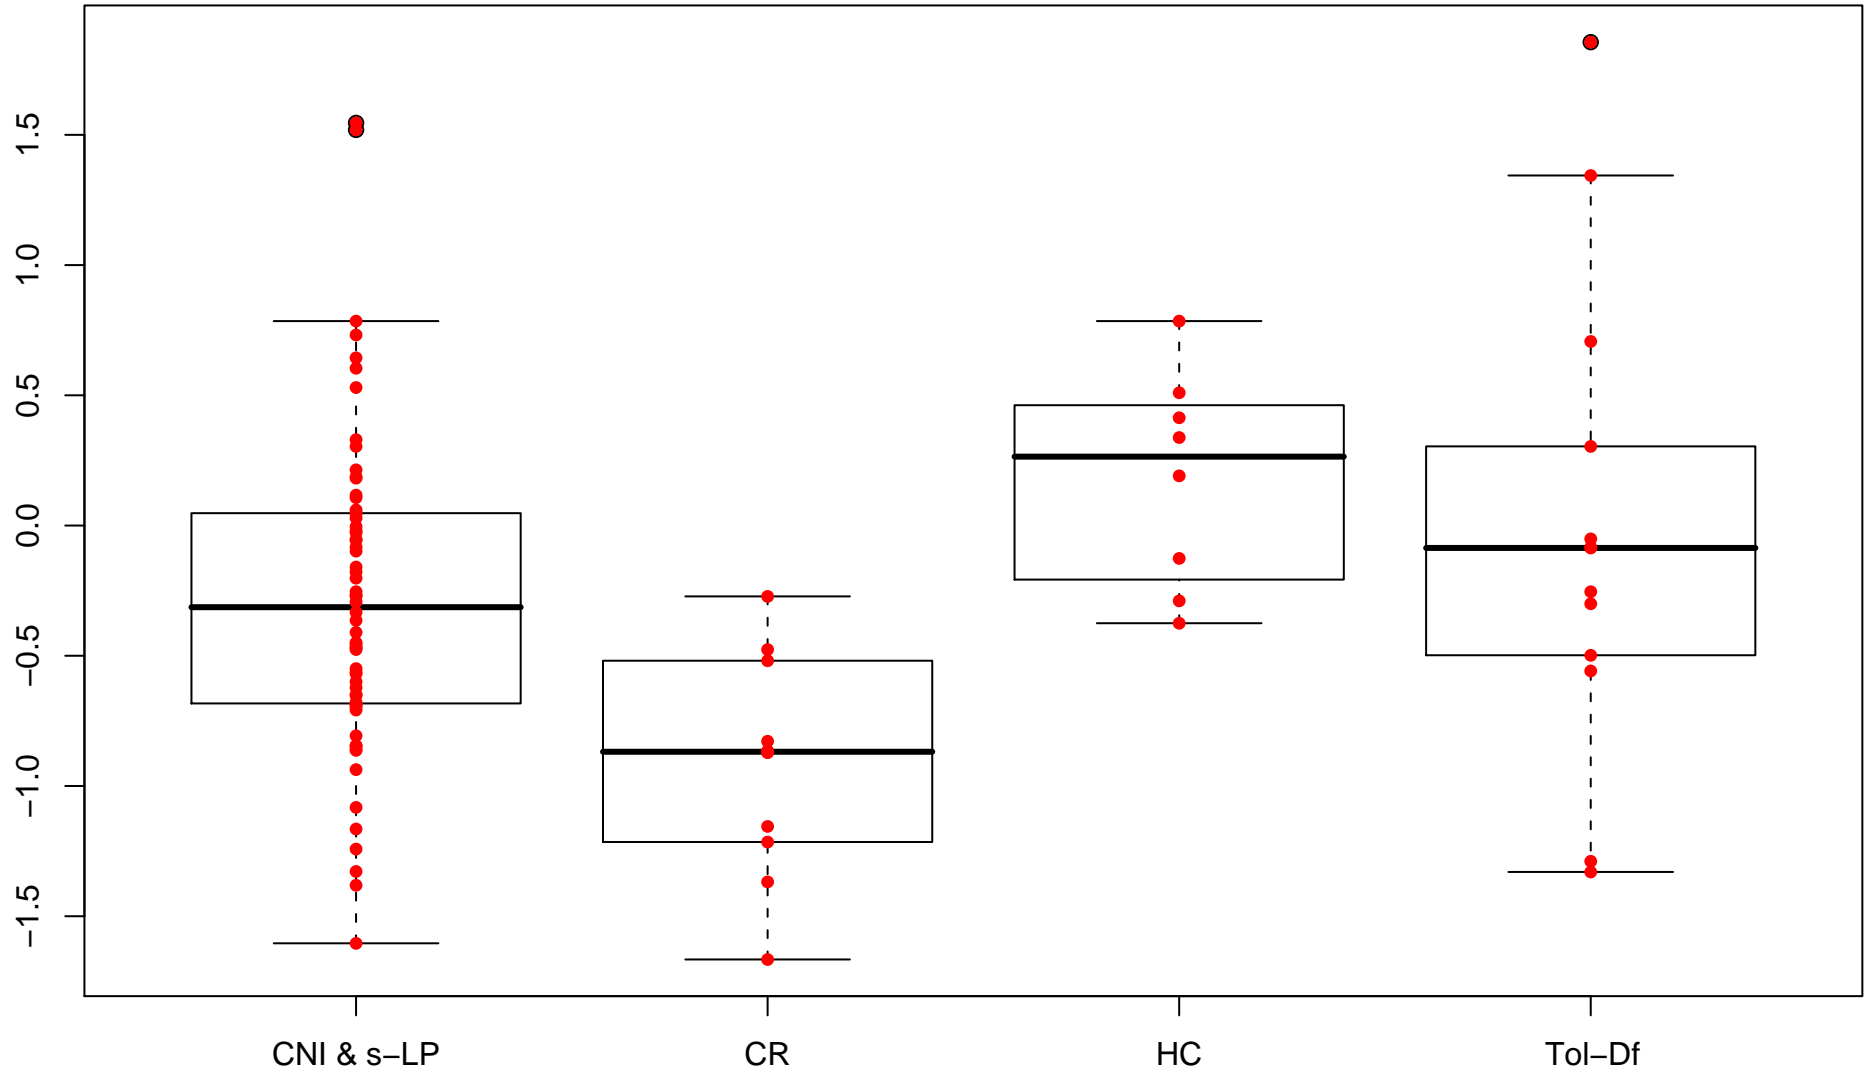



Rank 211 : IL1R2  
0.0006851

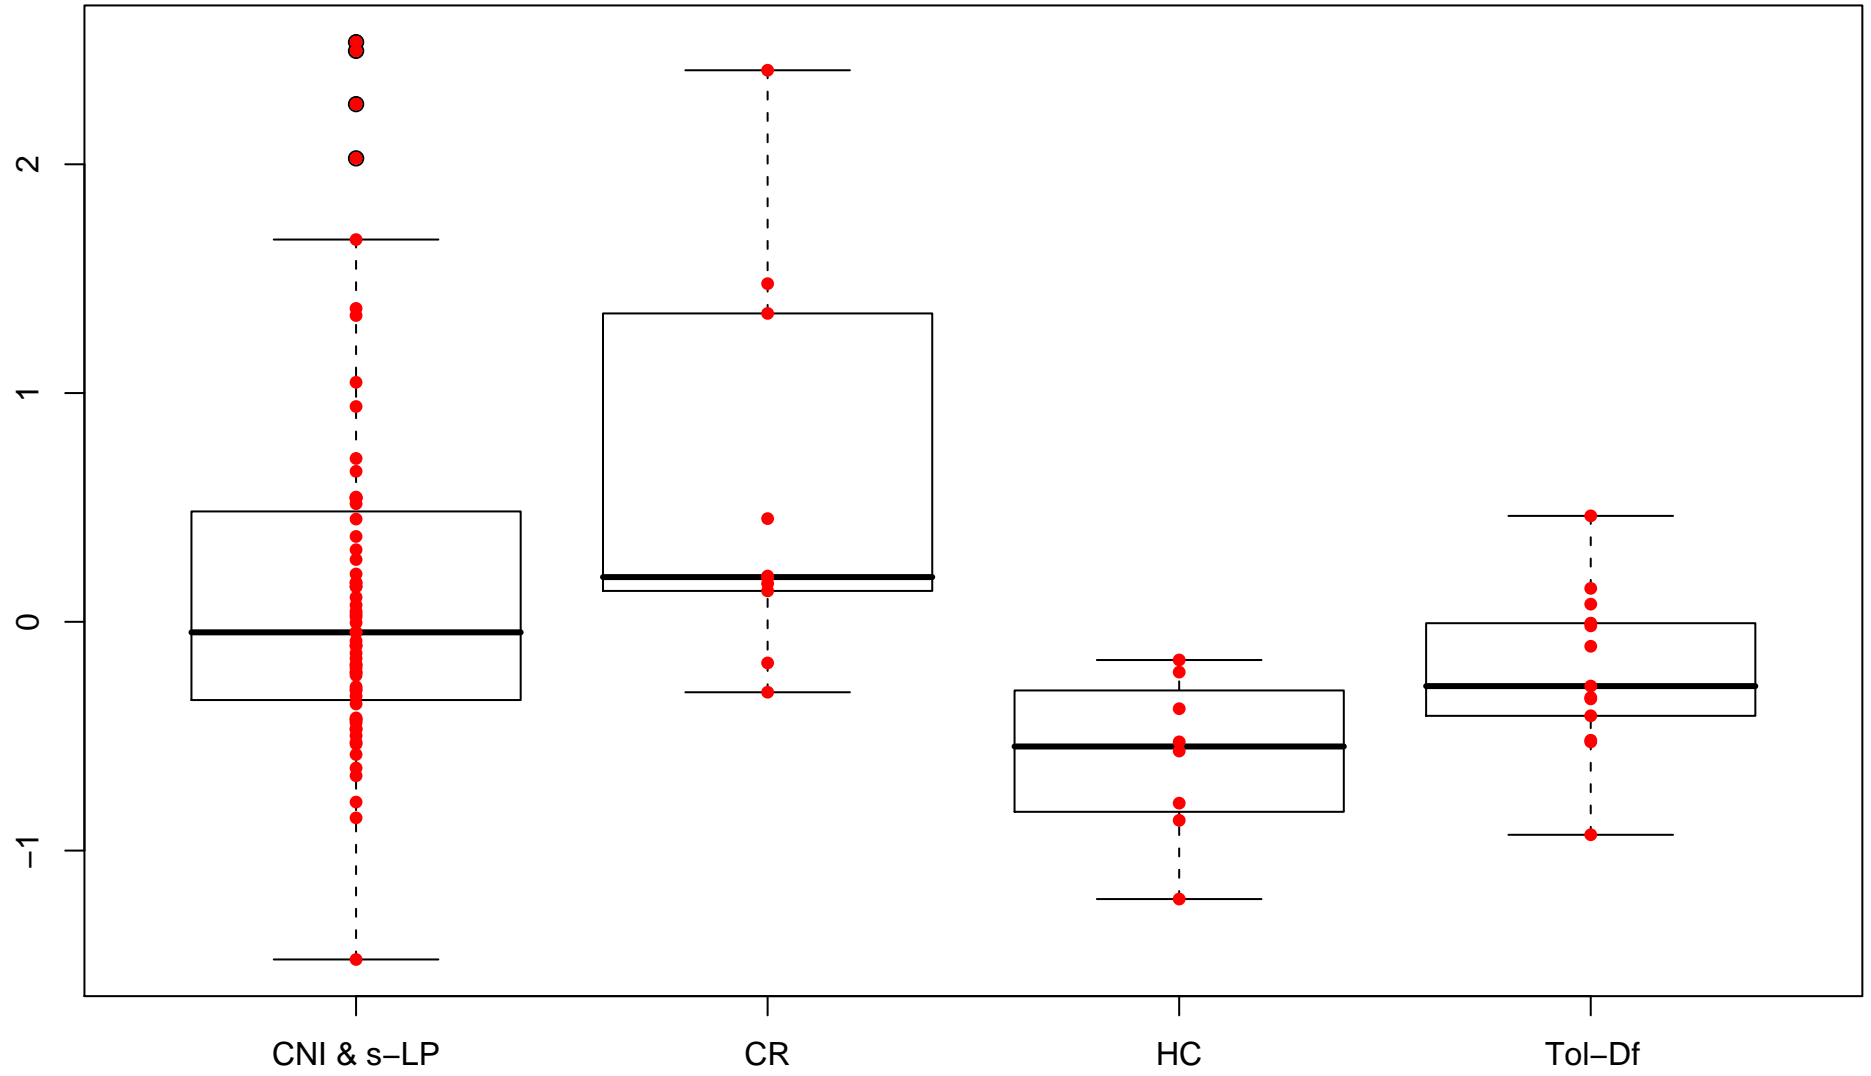

Rank 212 : HOXB2  
0.0007017

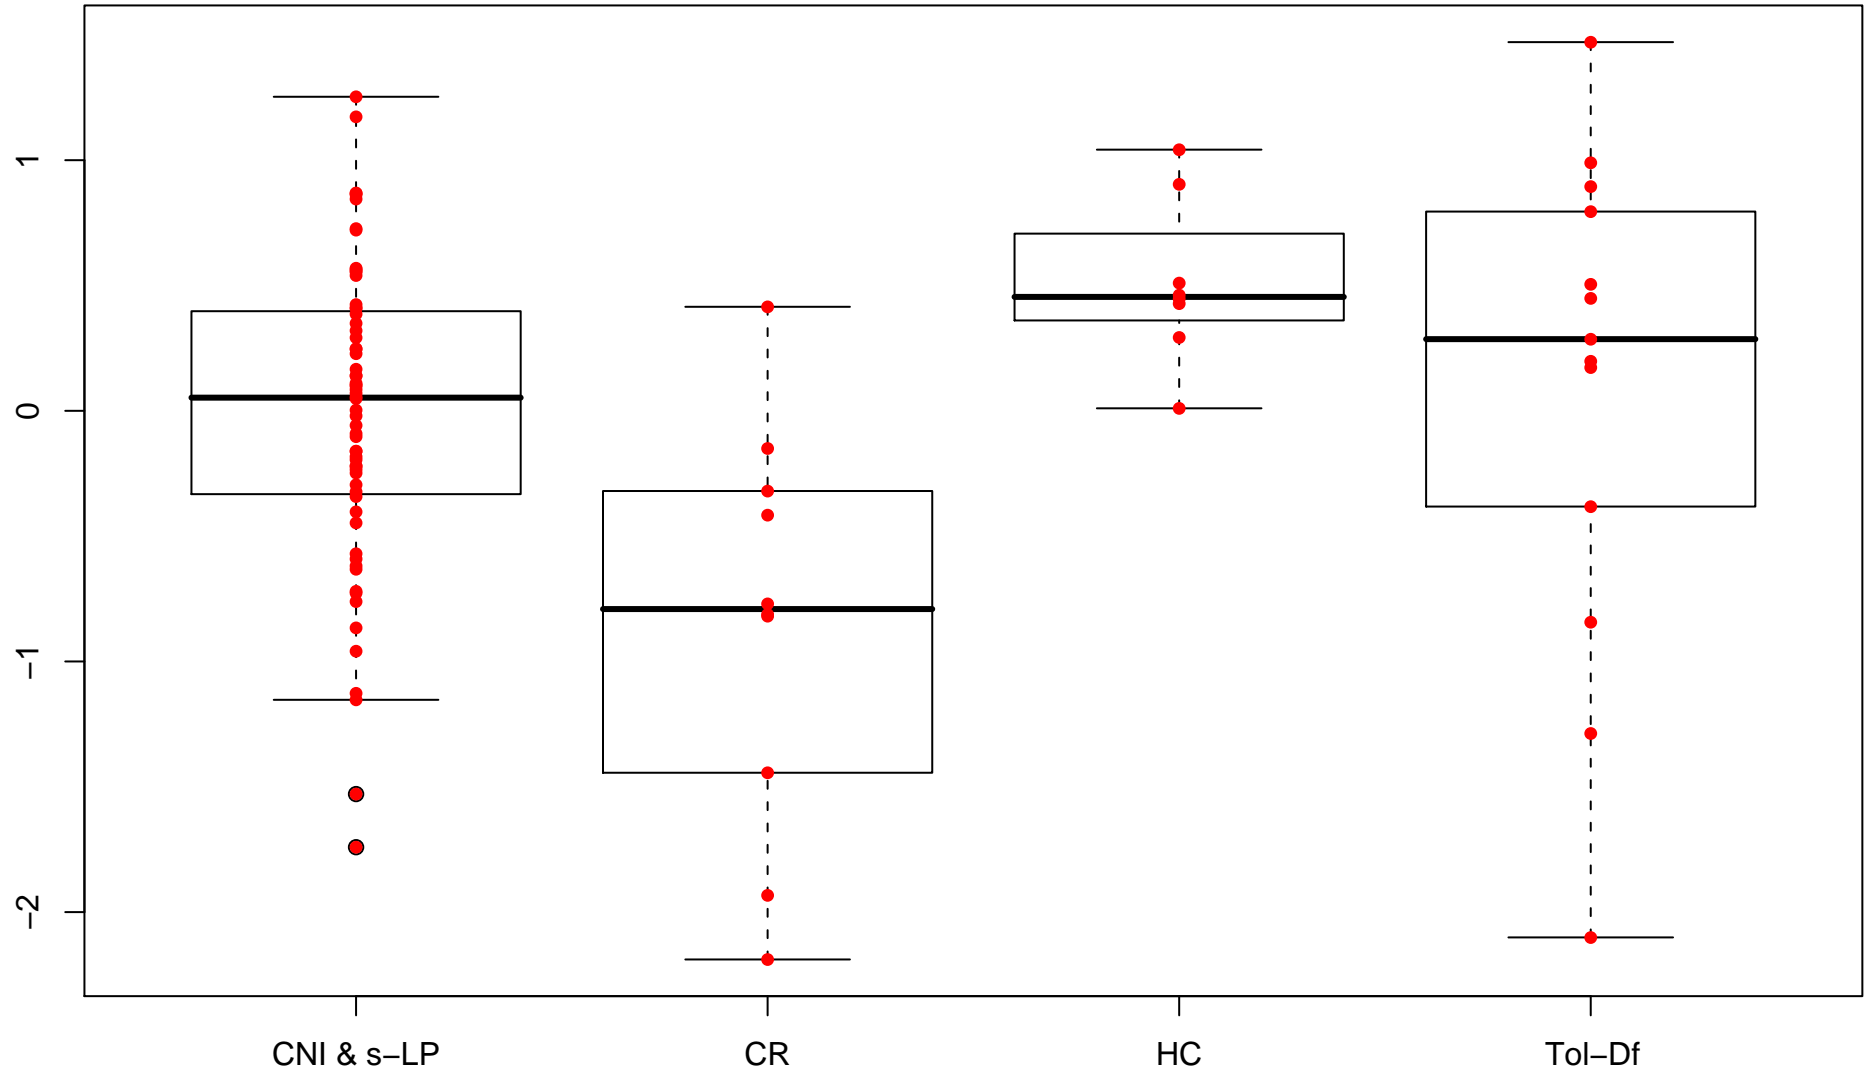

Rank 213 : VCAN  
0.000712

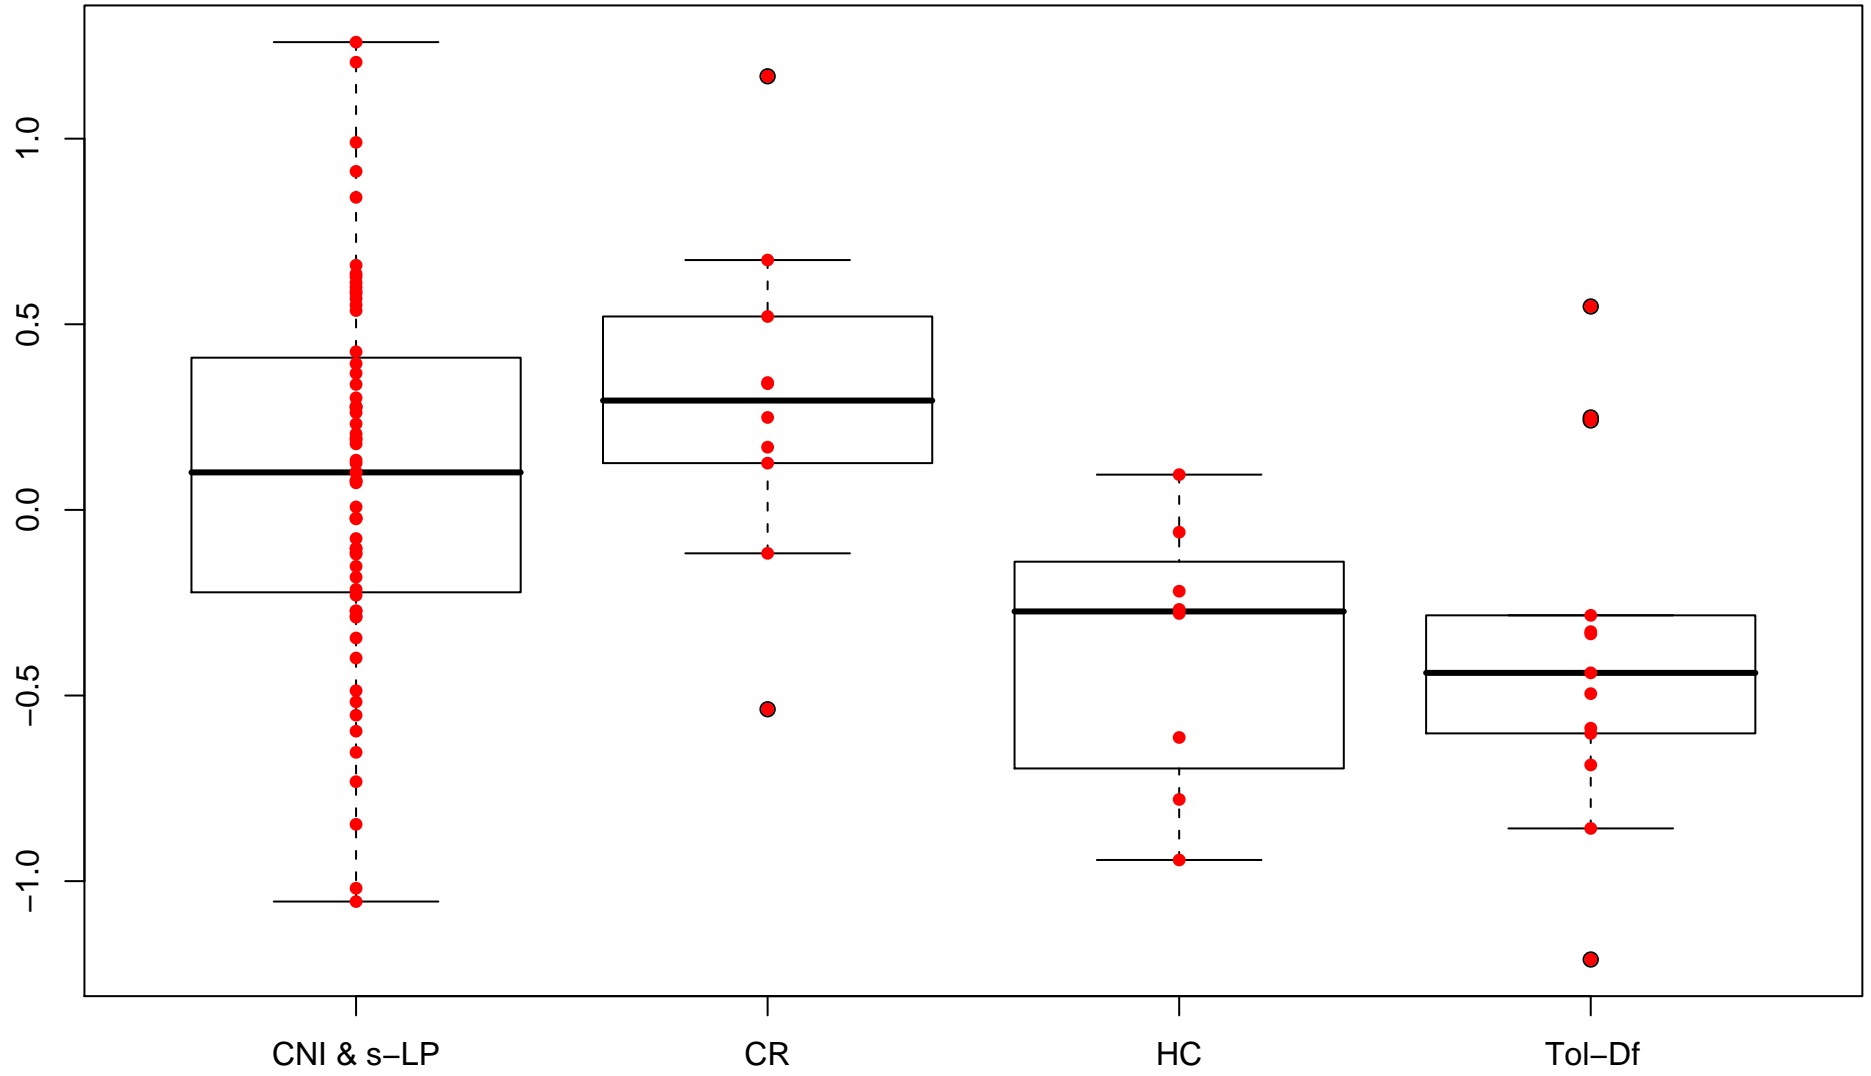

Rank 214 : FLT3  
0.0007149

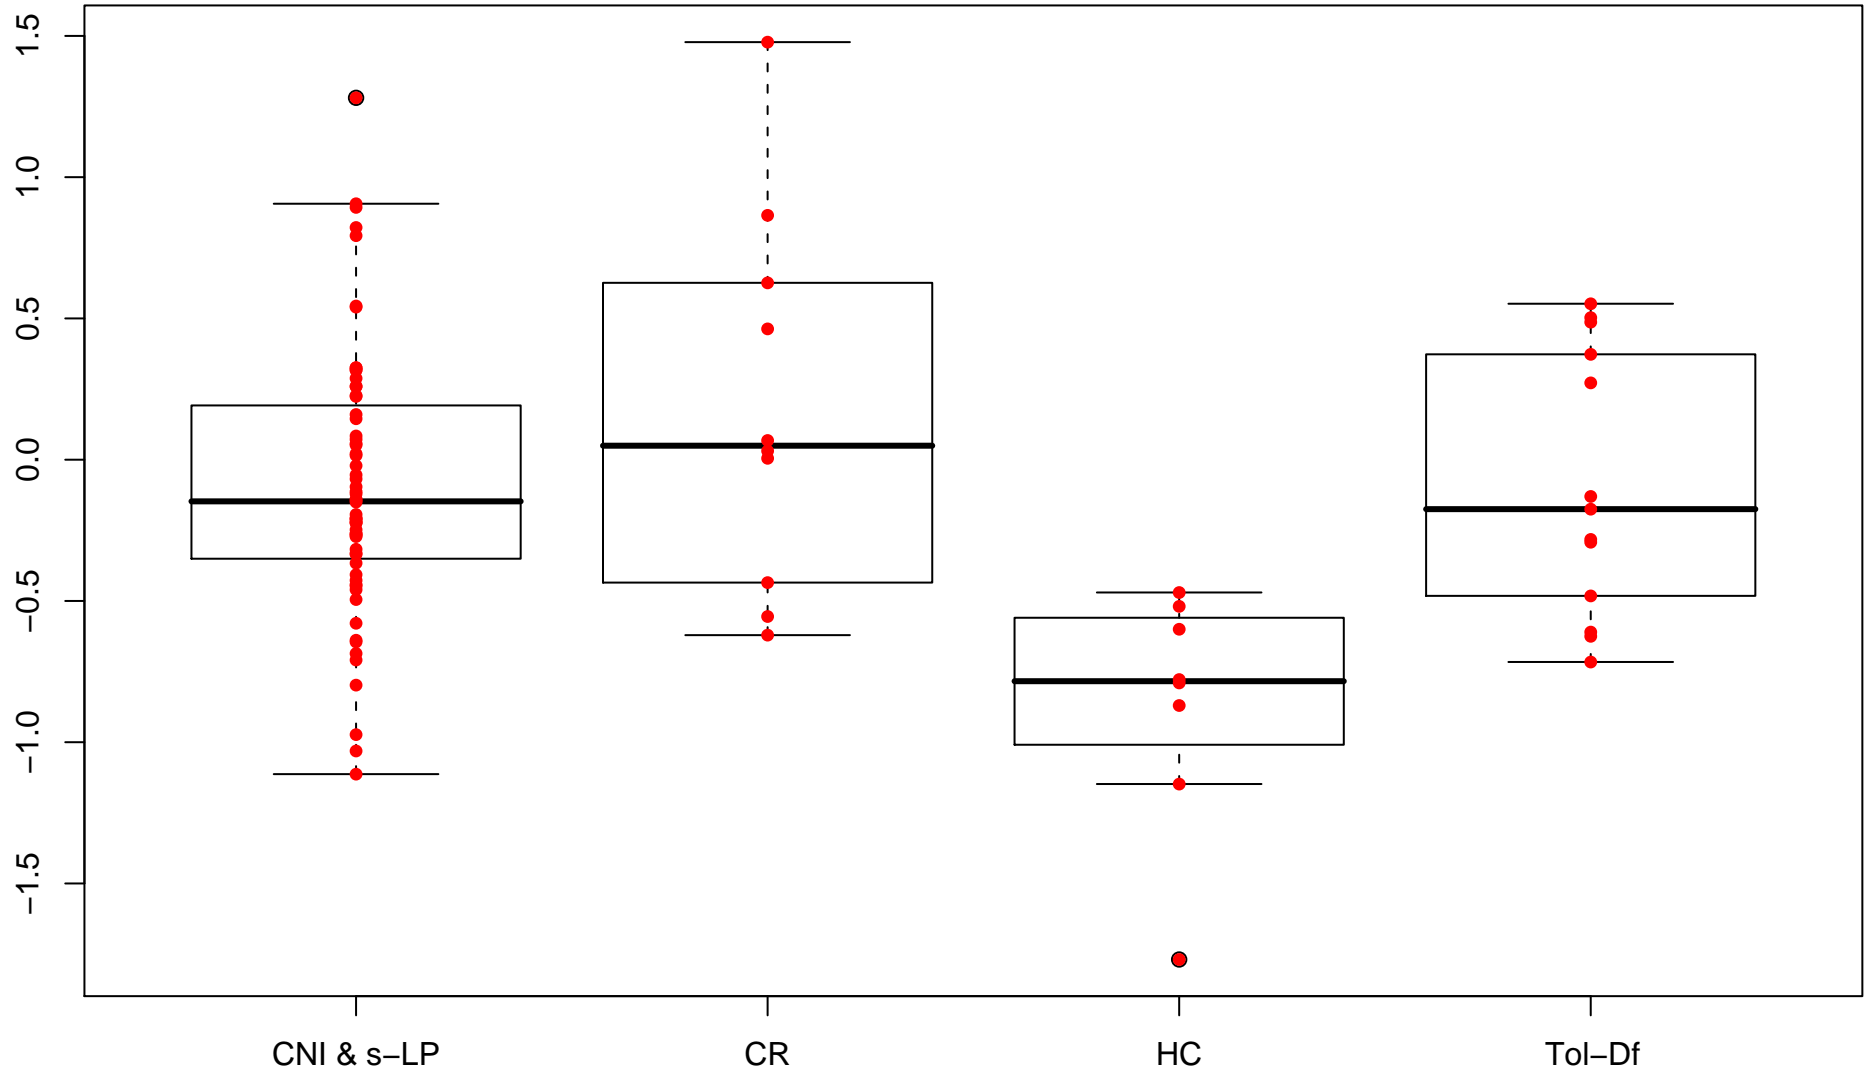

Rank 215 : CD55  
0.0007203

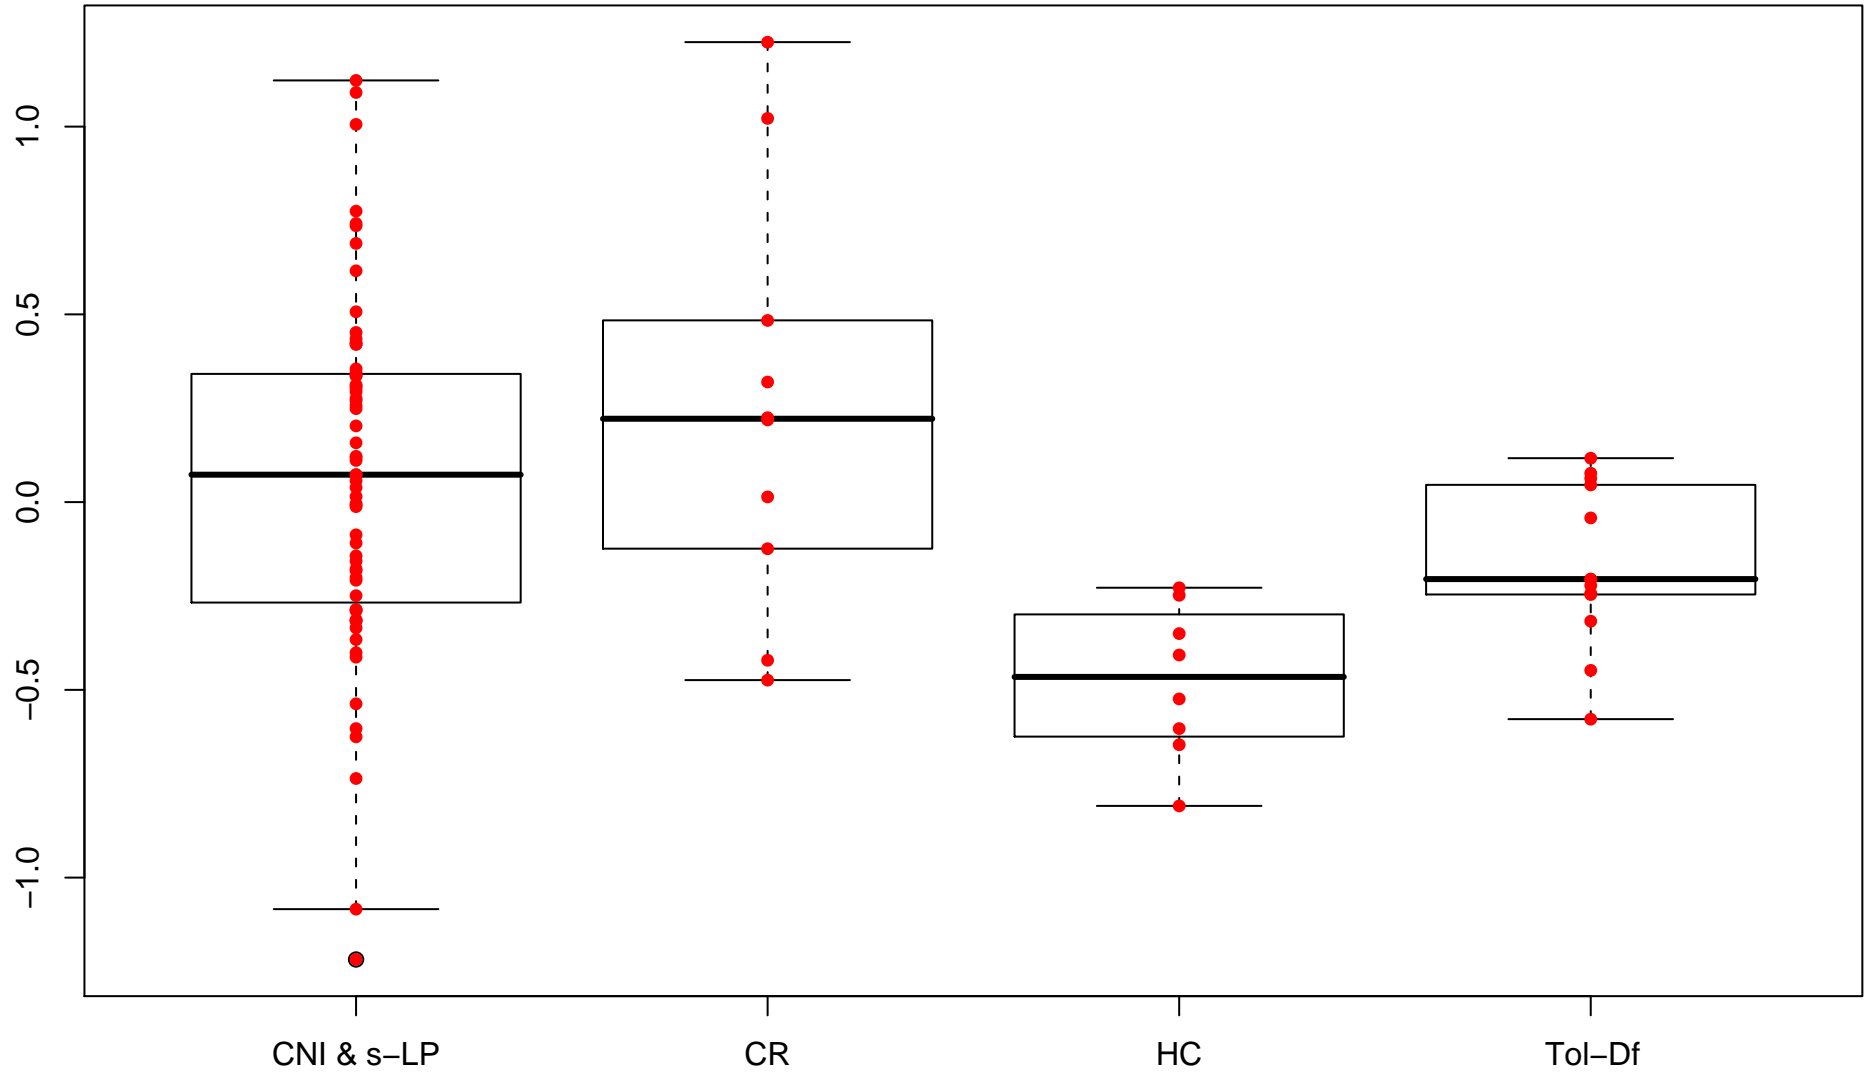

Rank 216 : SLC26A8  
0.0007239

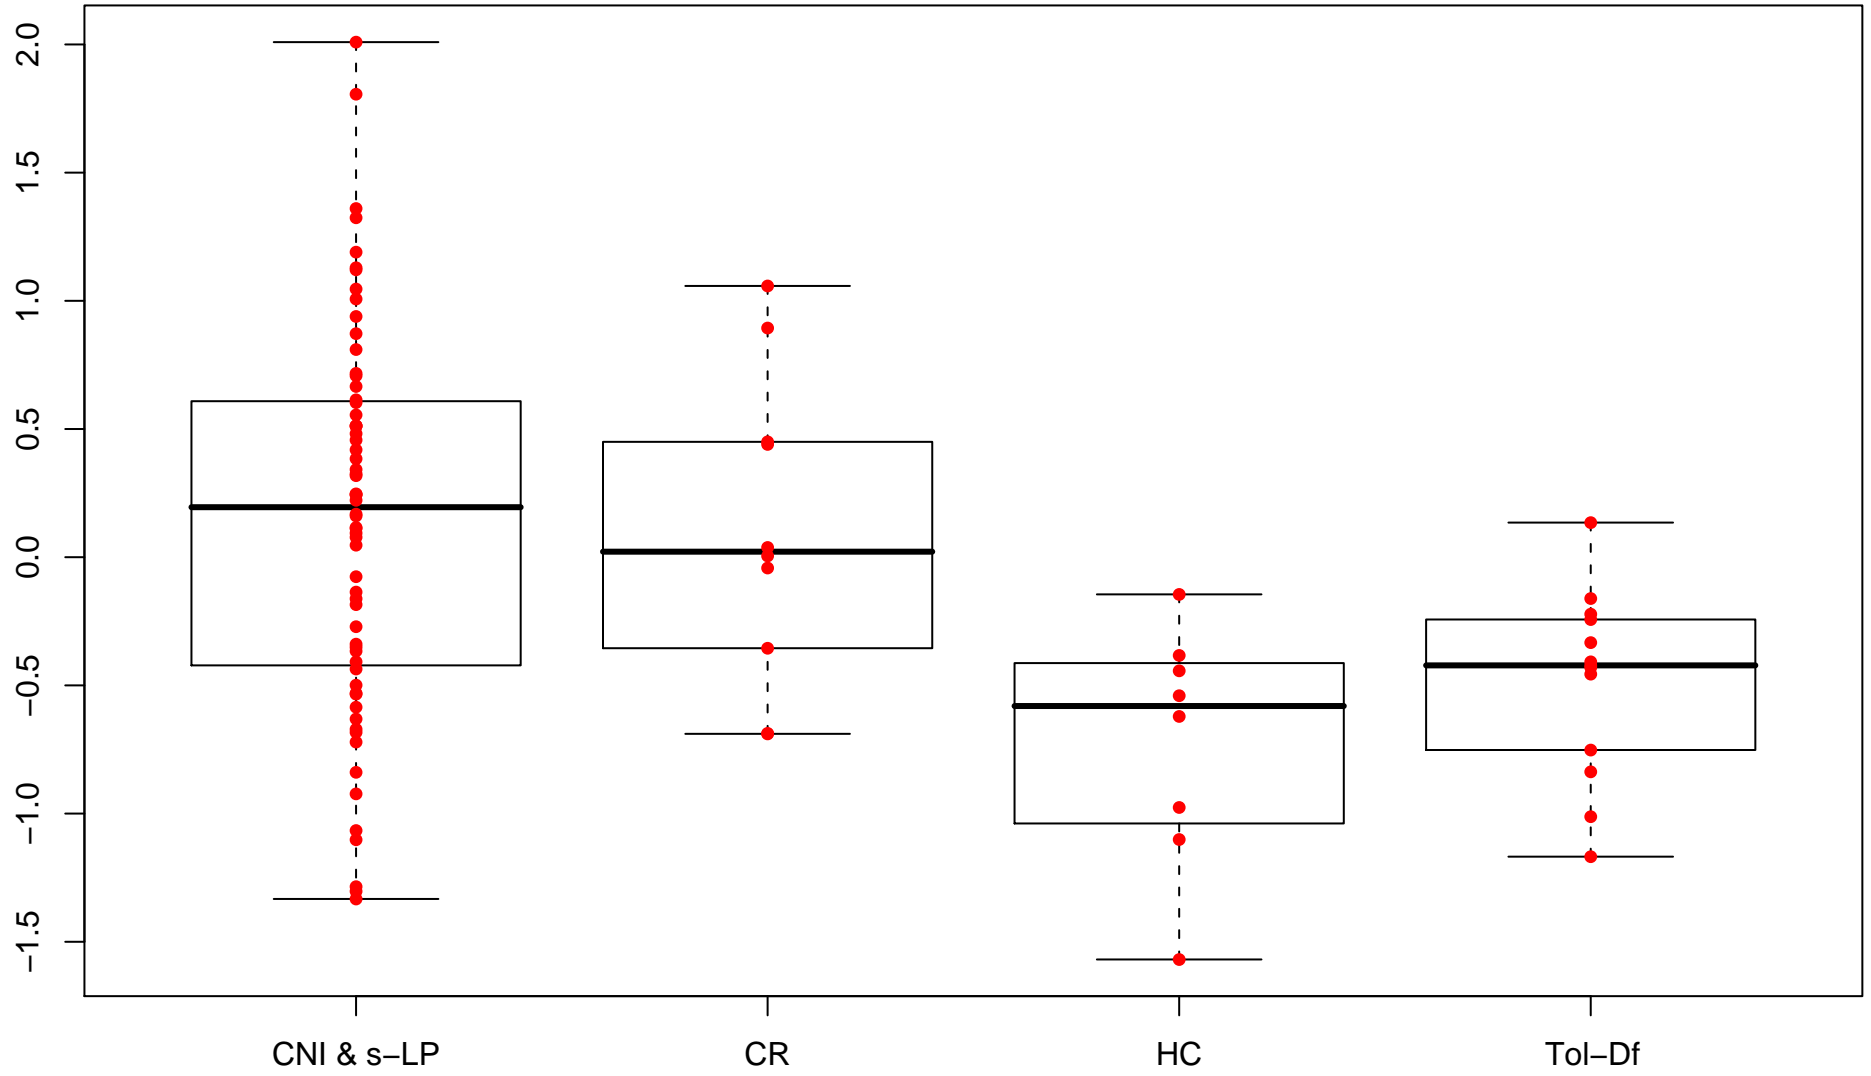

Rank 217 : PDLIM1  
0.0007299

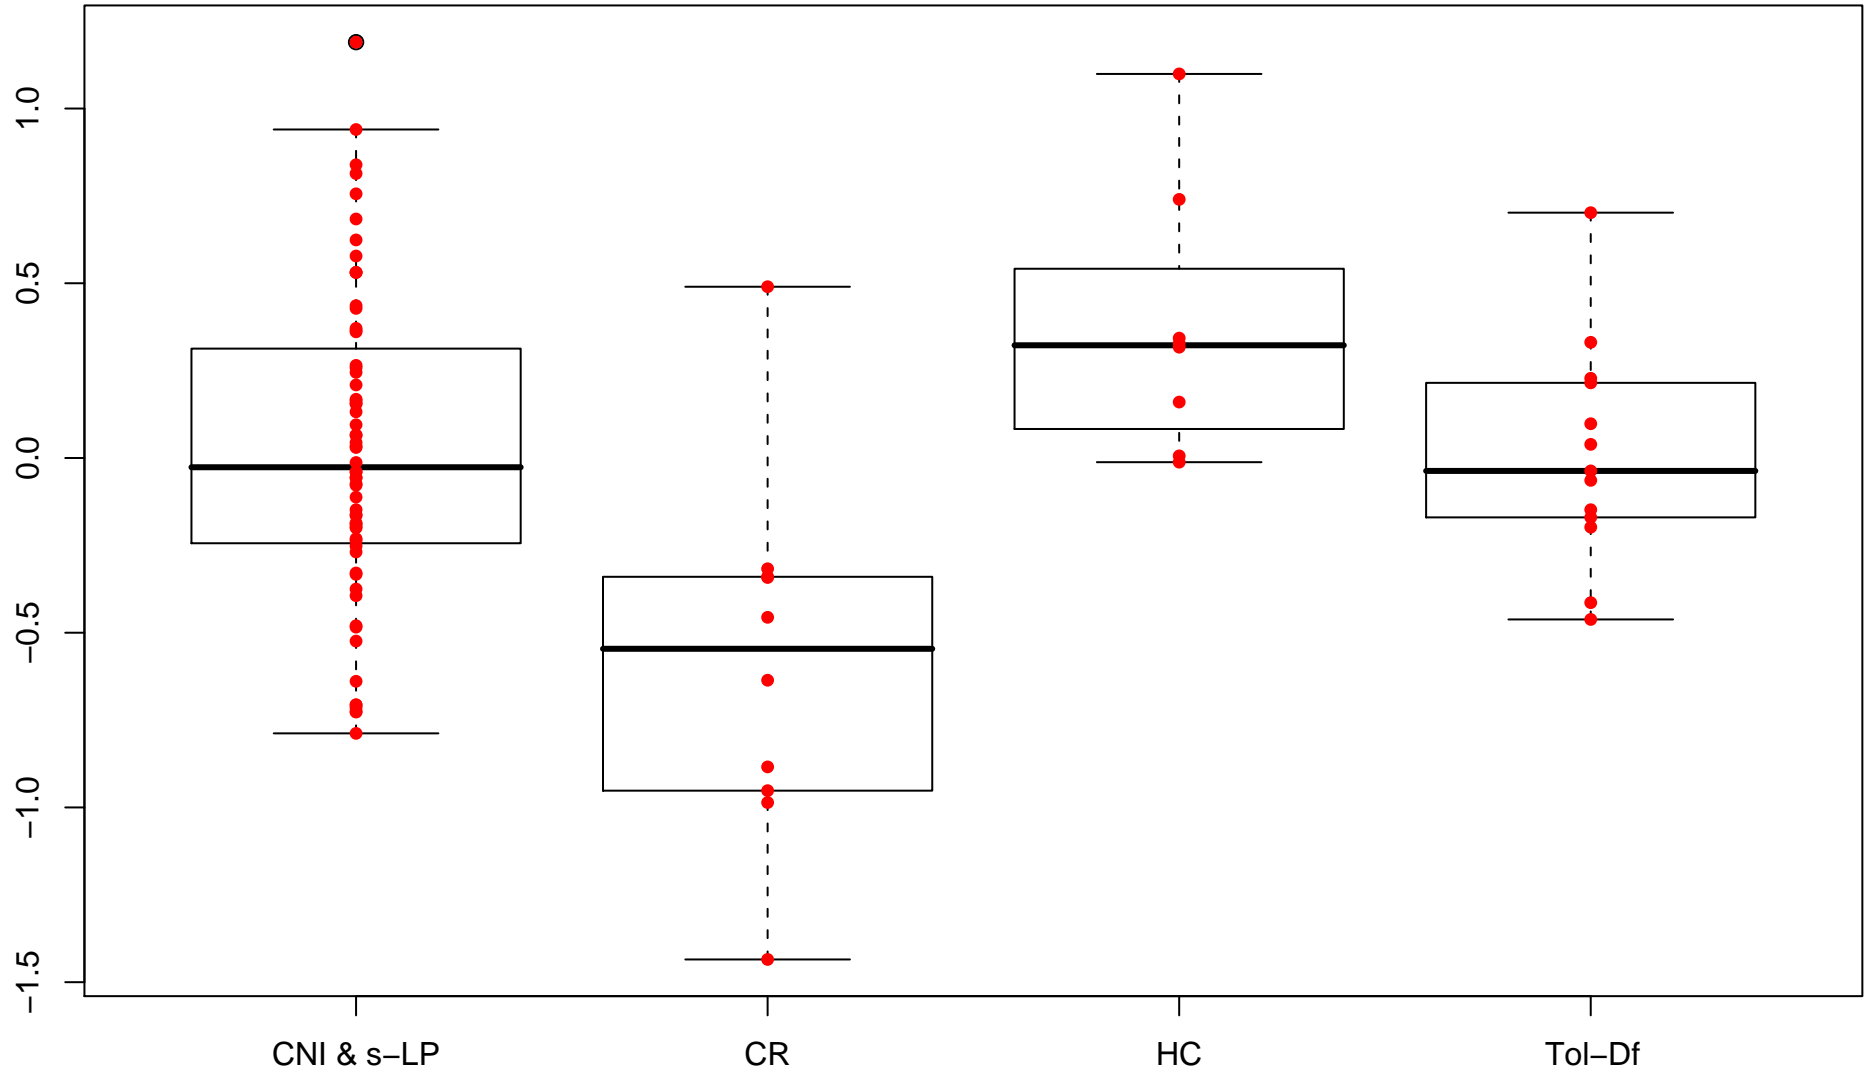

Rank 218 : ZMYM1  
0.0007352

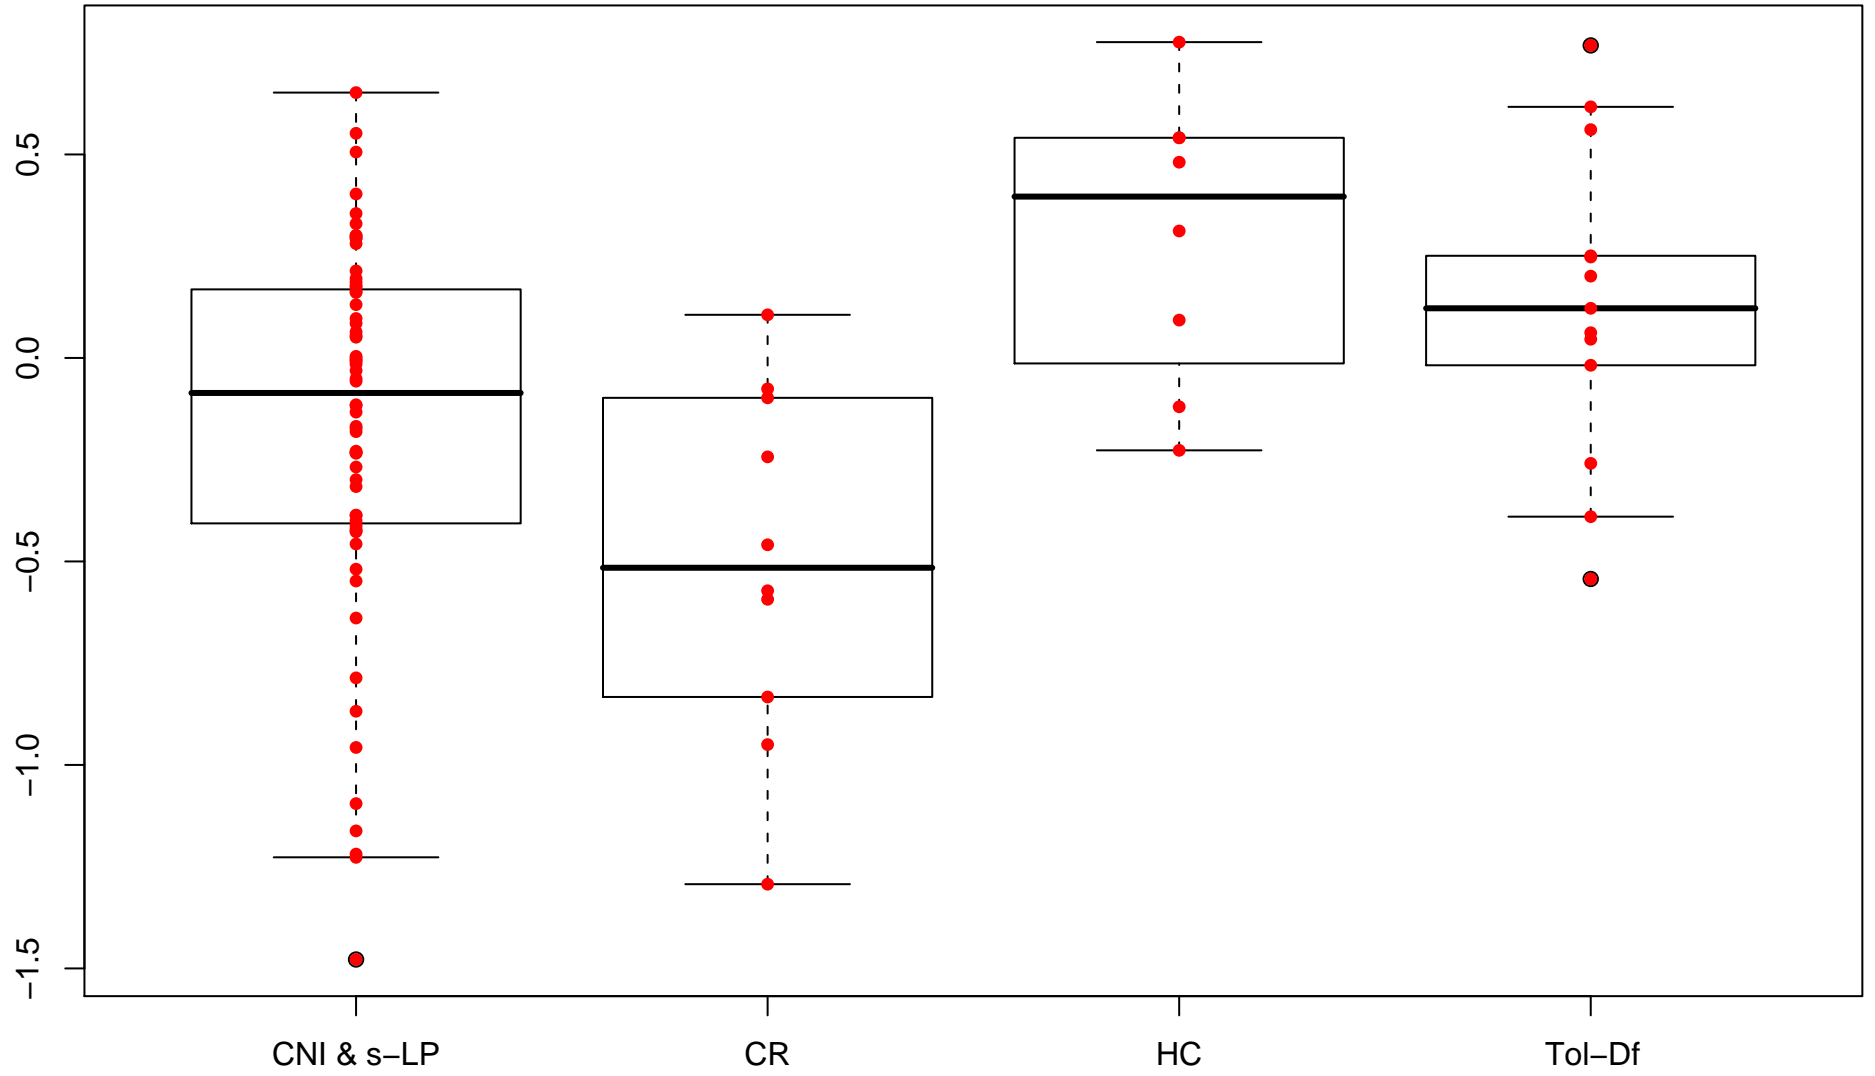



Rank 219 : FCGR1A  
0.0007437

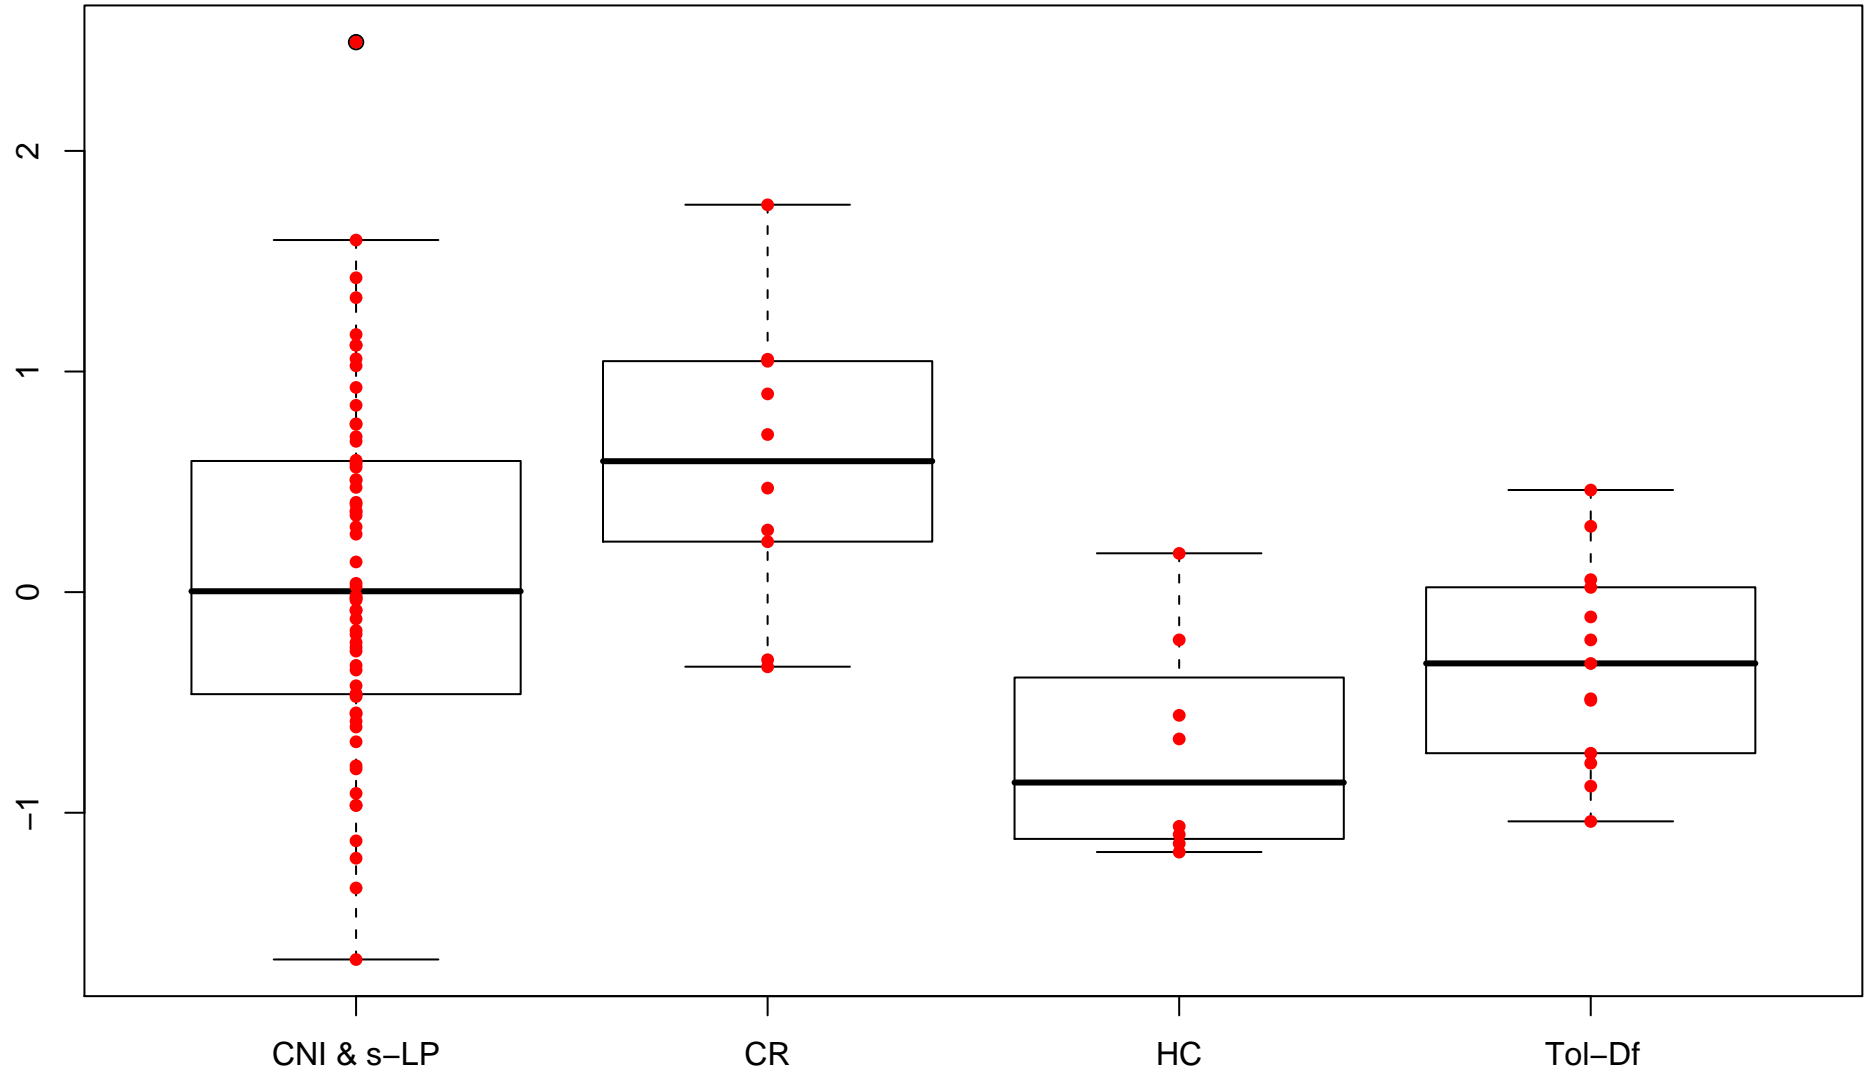

Rank 220 : LGALS8  
0.0007442

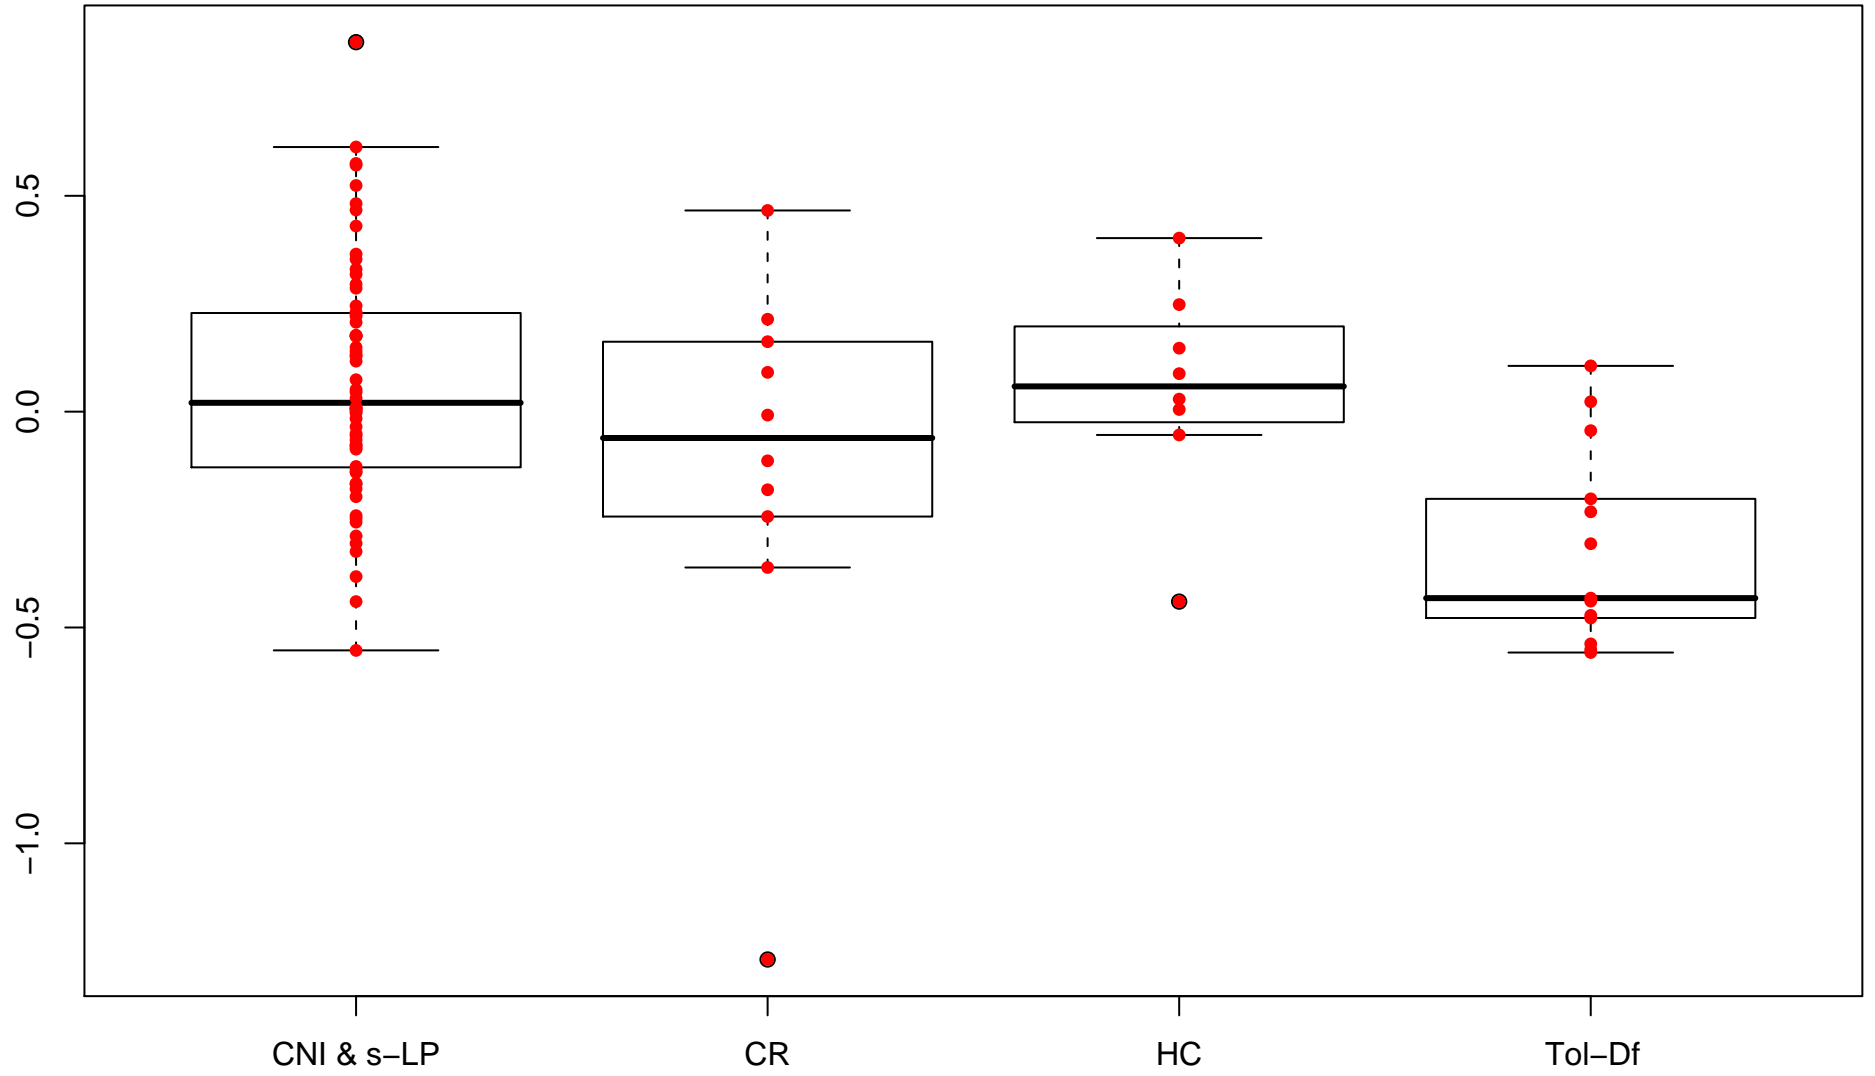

Rank 221 : MRPS30  
0.0007479

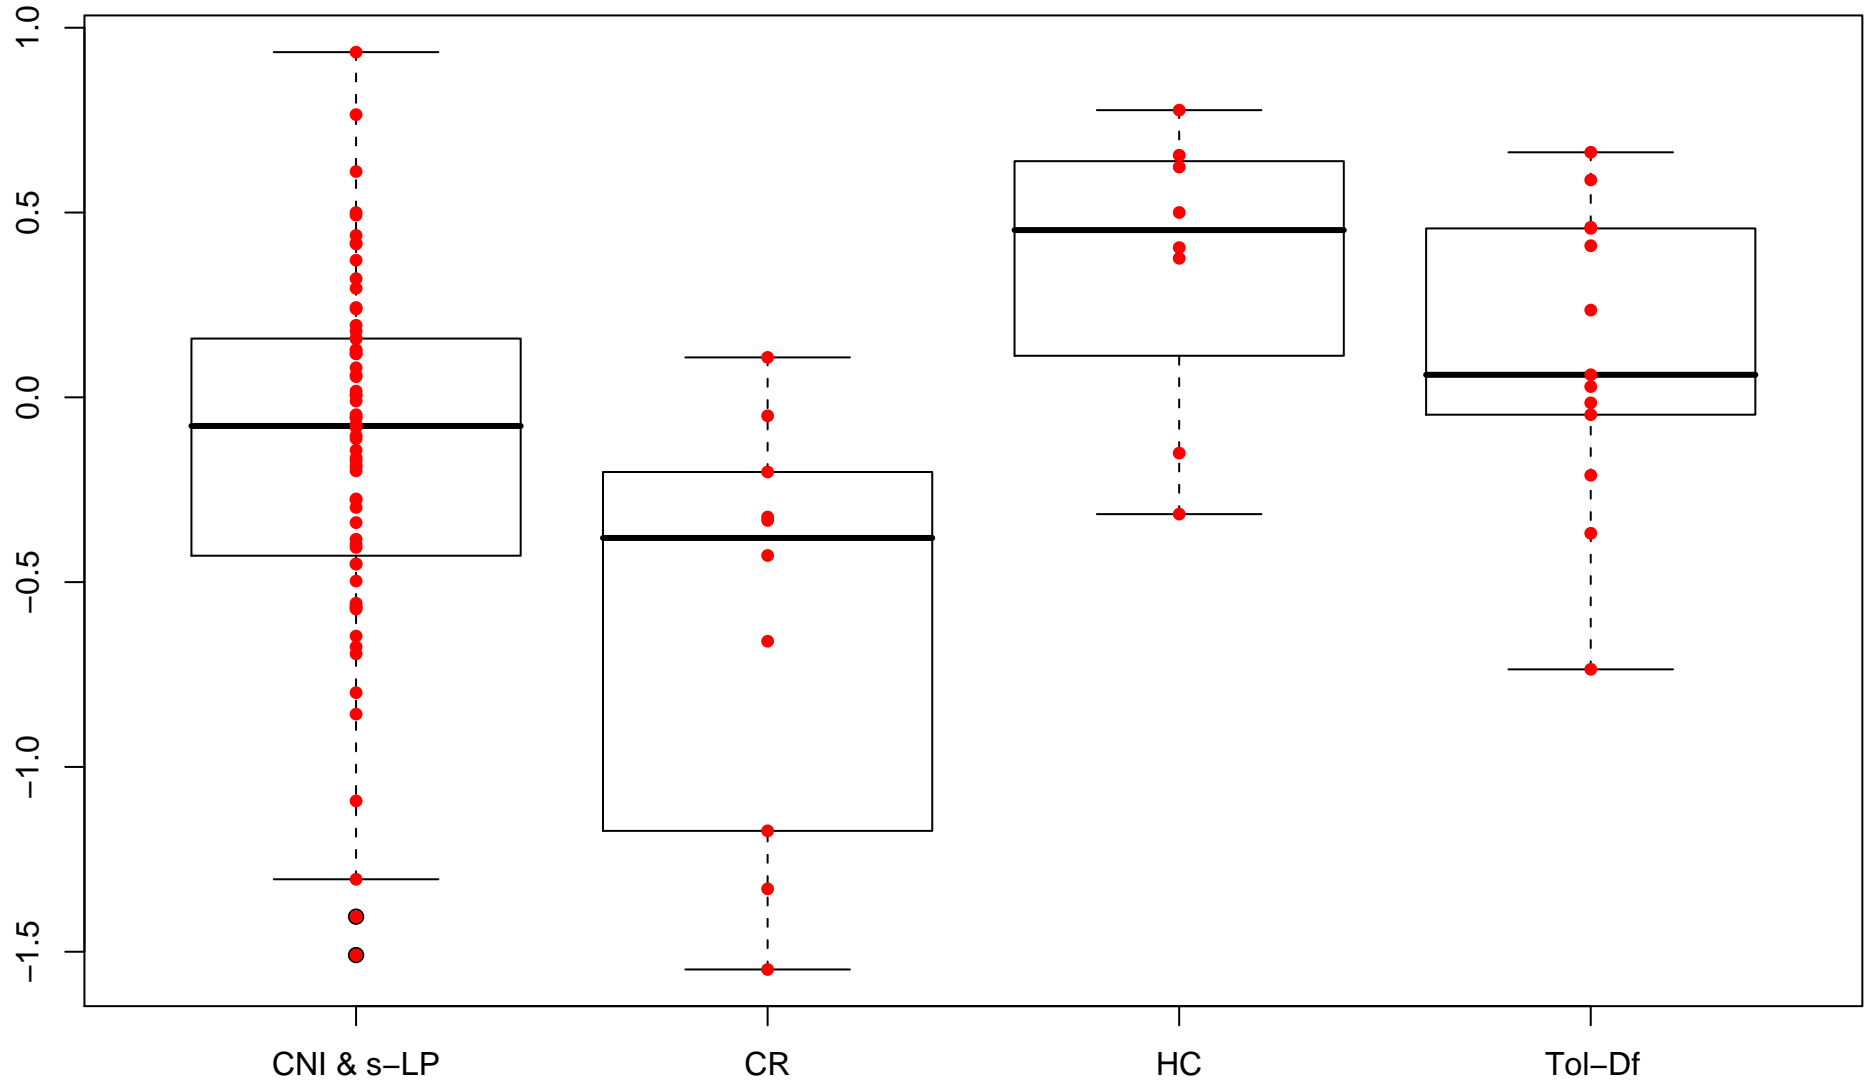

Rank 222 : CLIC3  
0.0007495

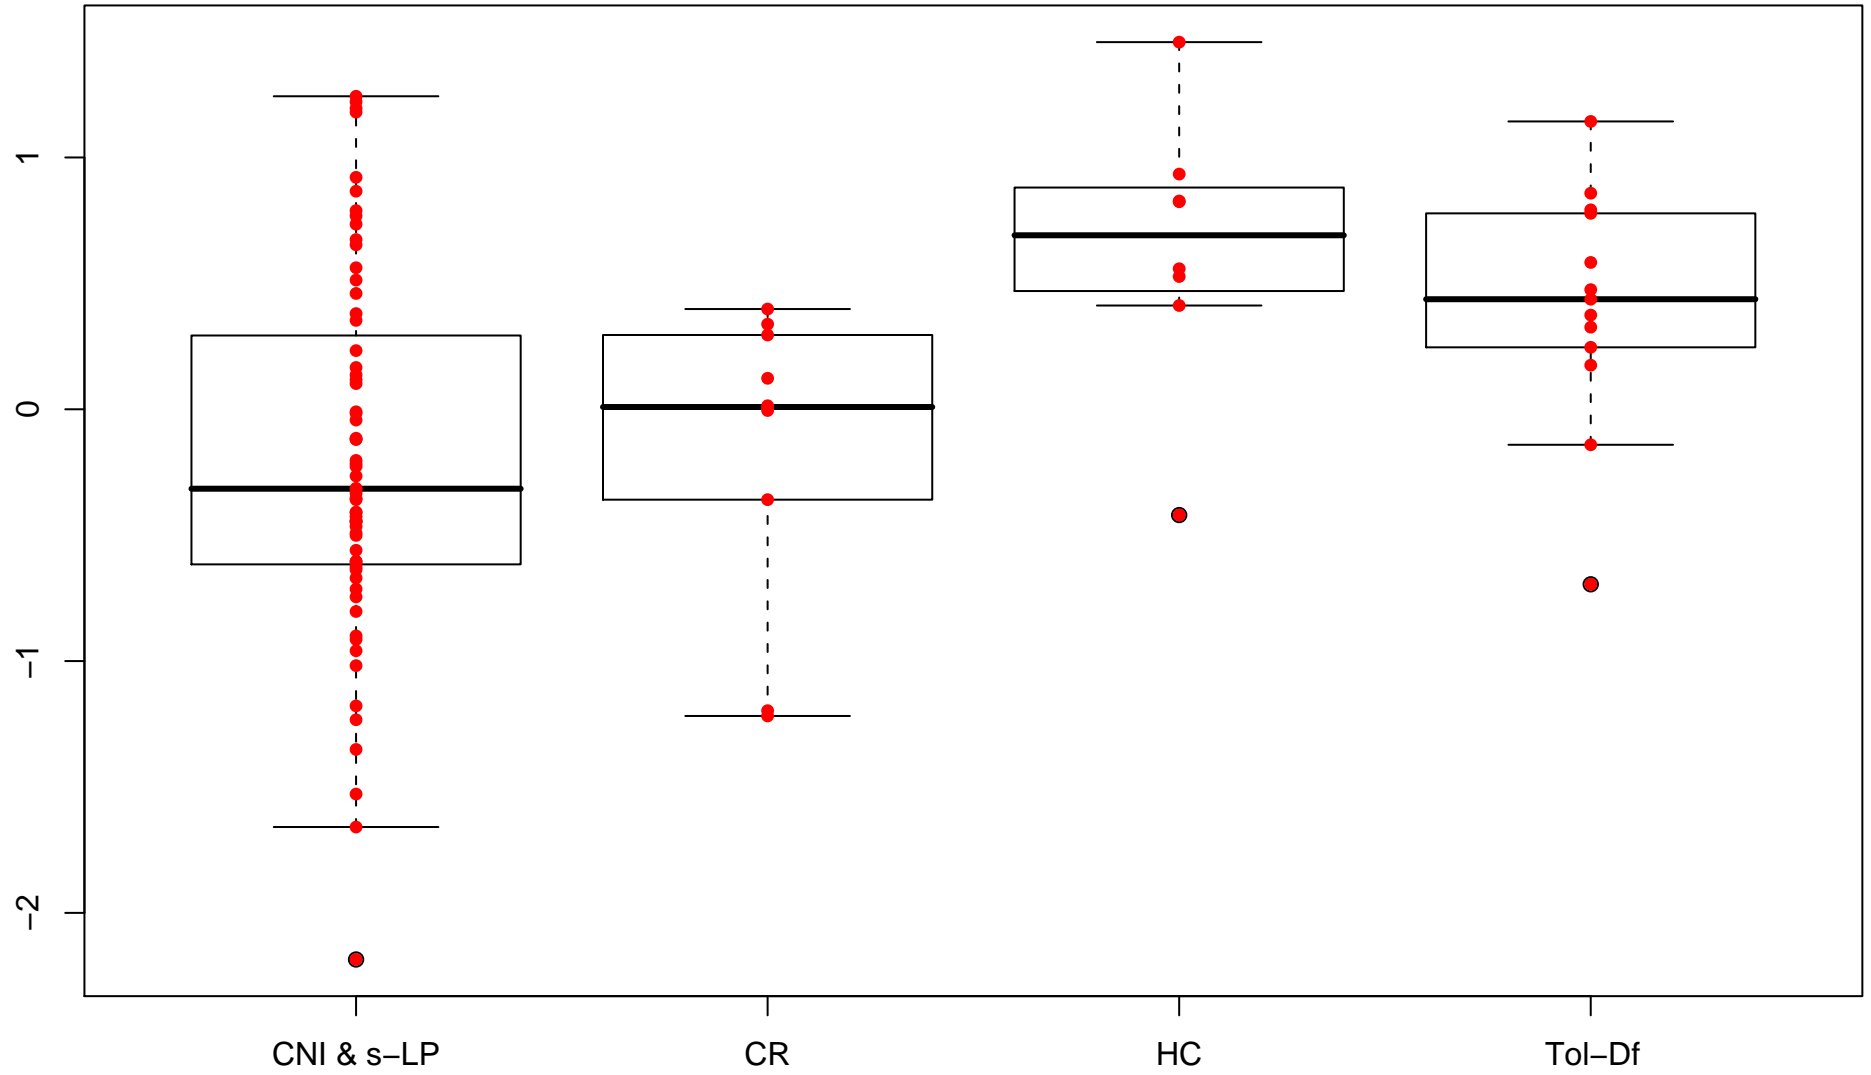

Rank 223 : BEX4  
0.0007498

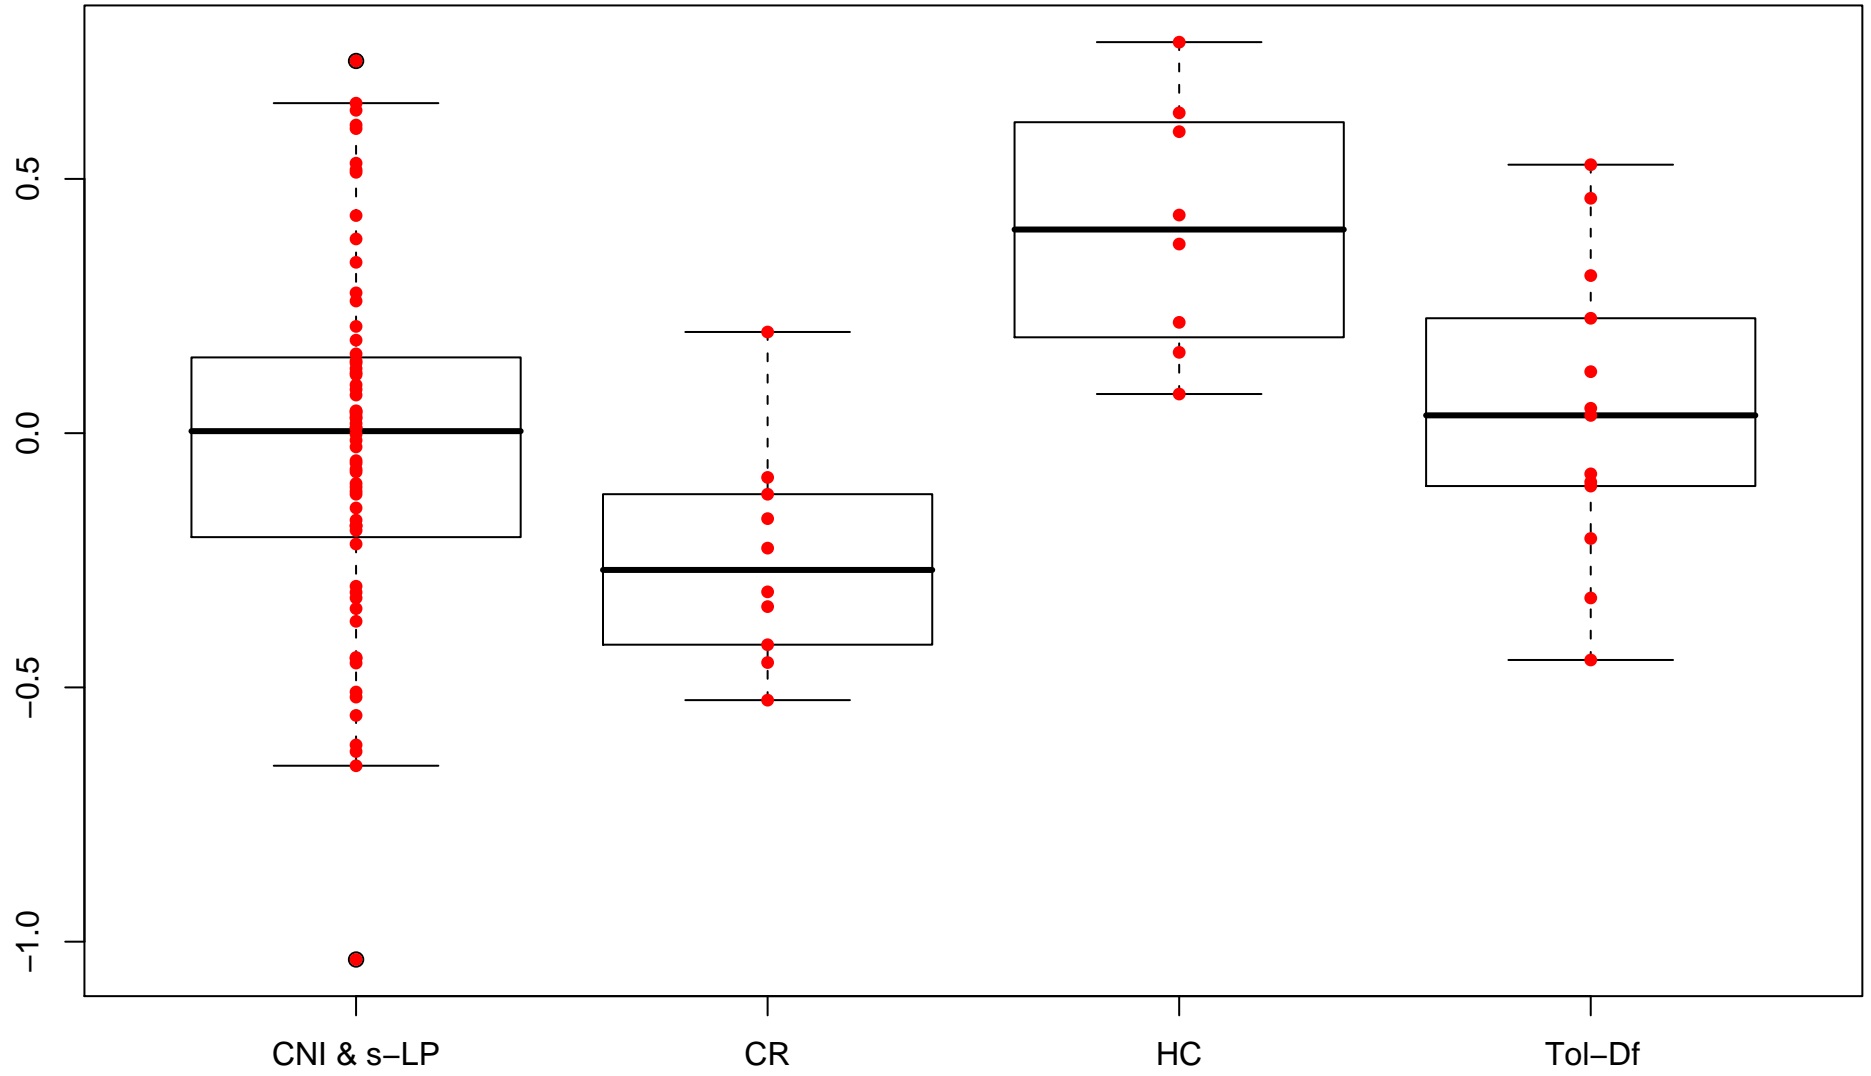

Rank 224 : SLC11A1  
0.0007508

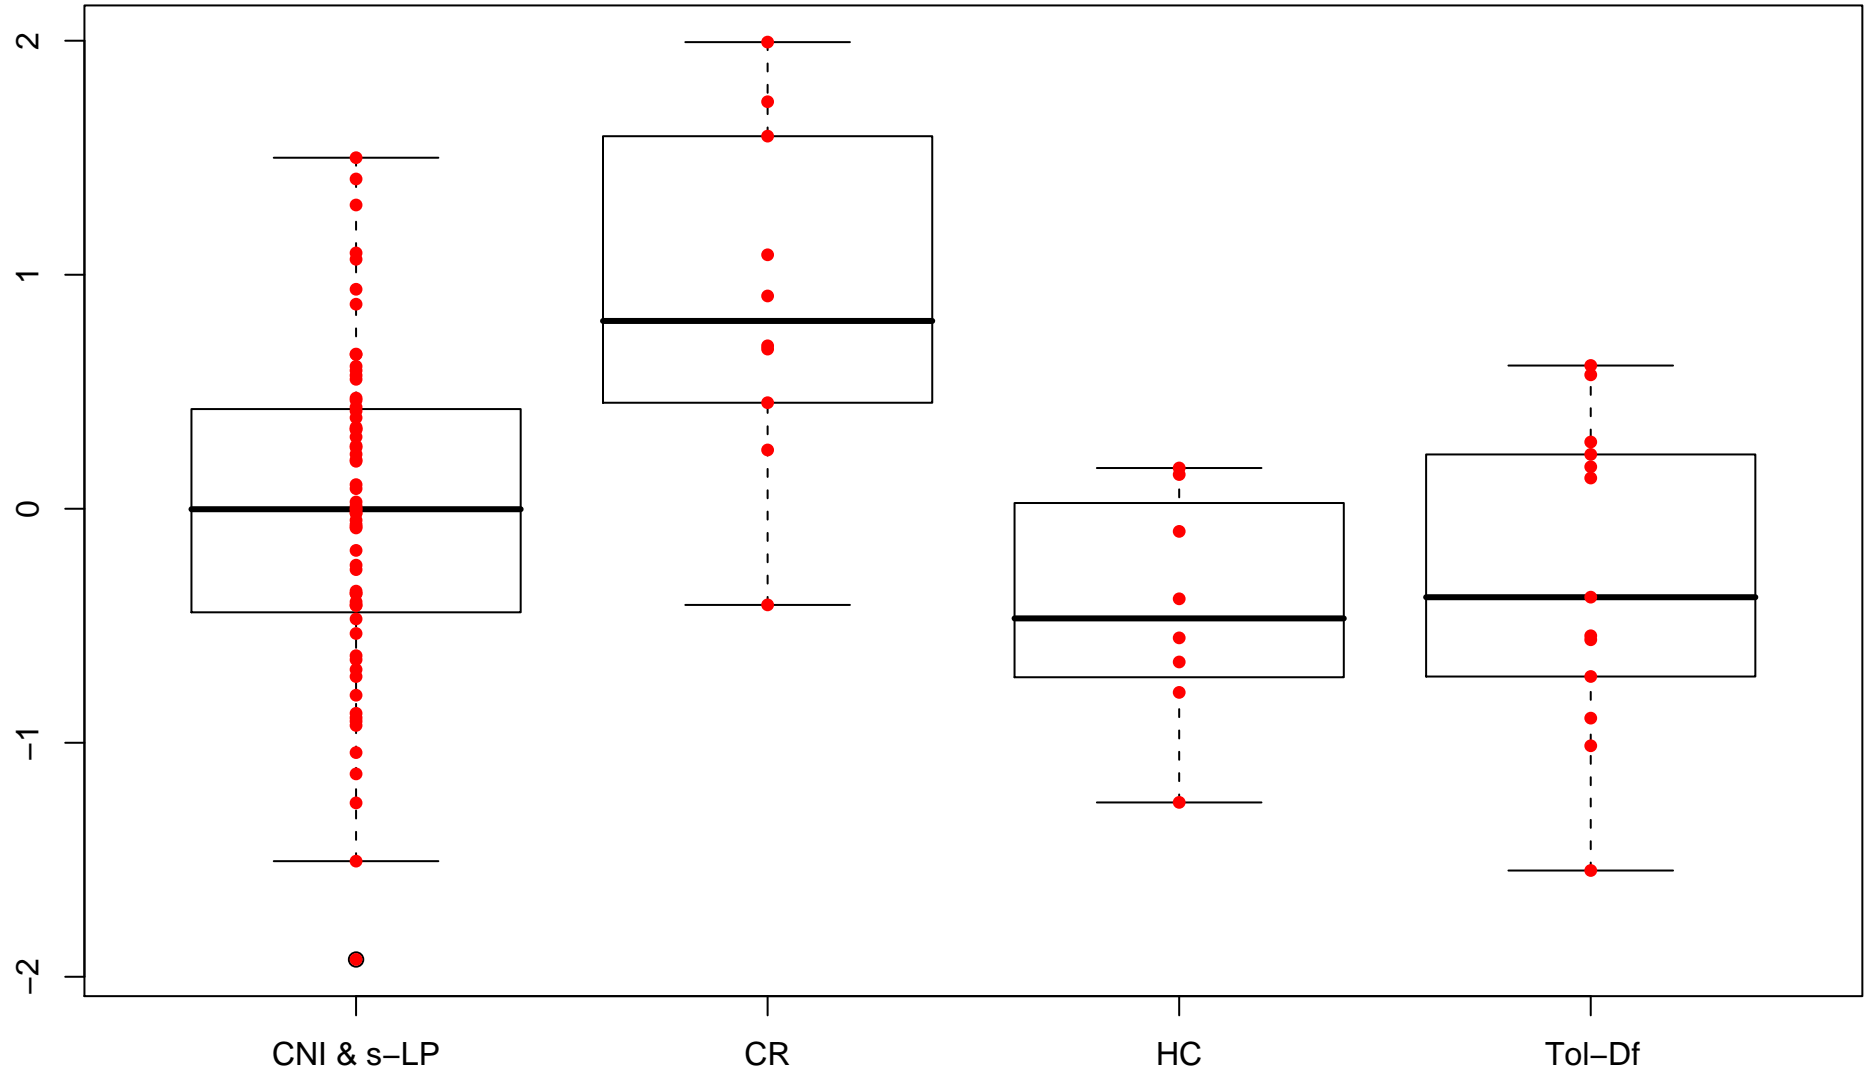

Rank 225 : BMP2K  
0.0007561

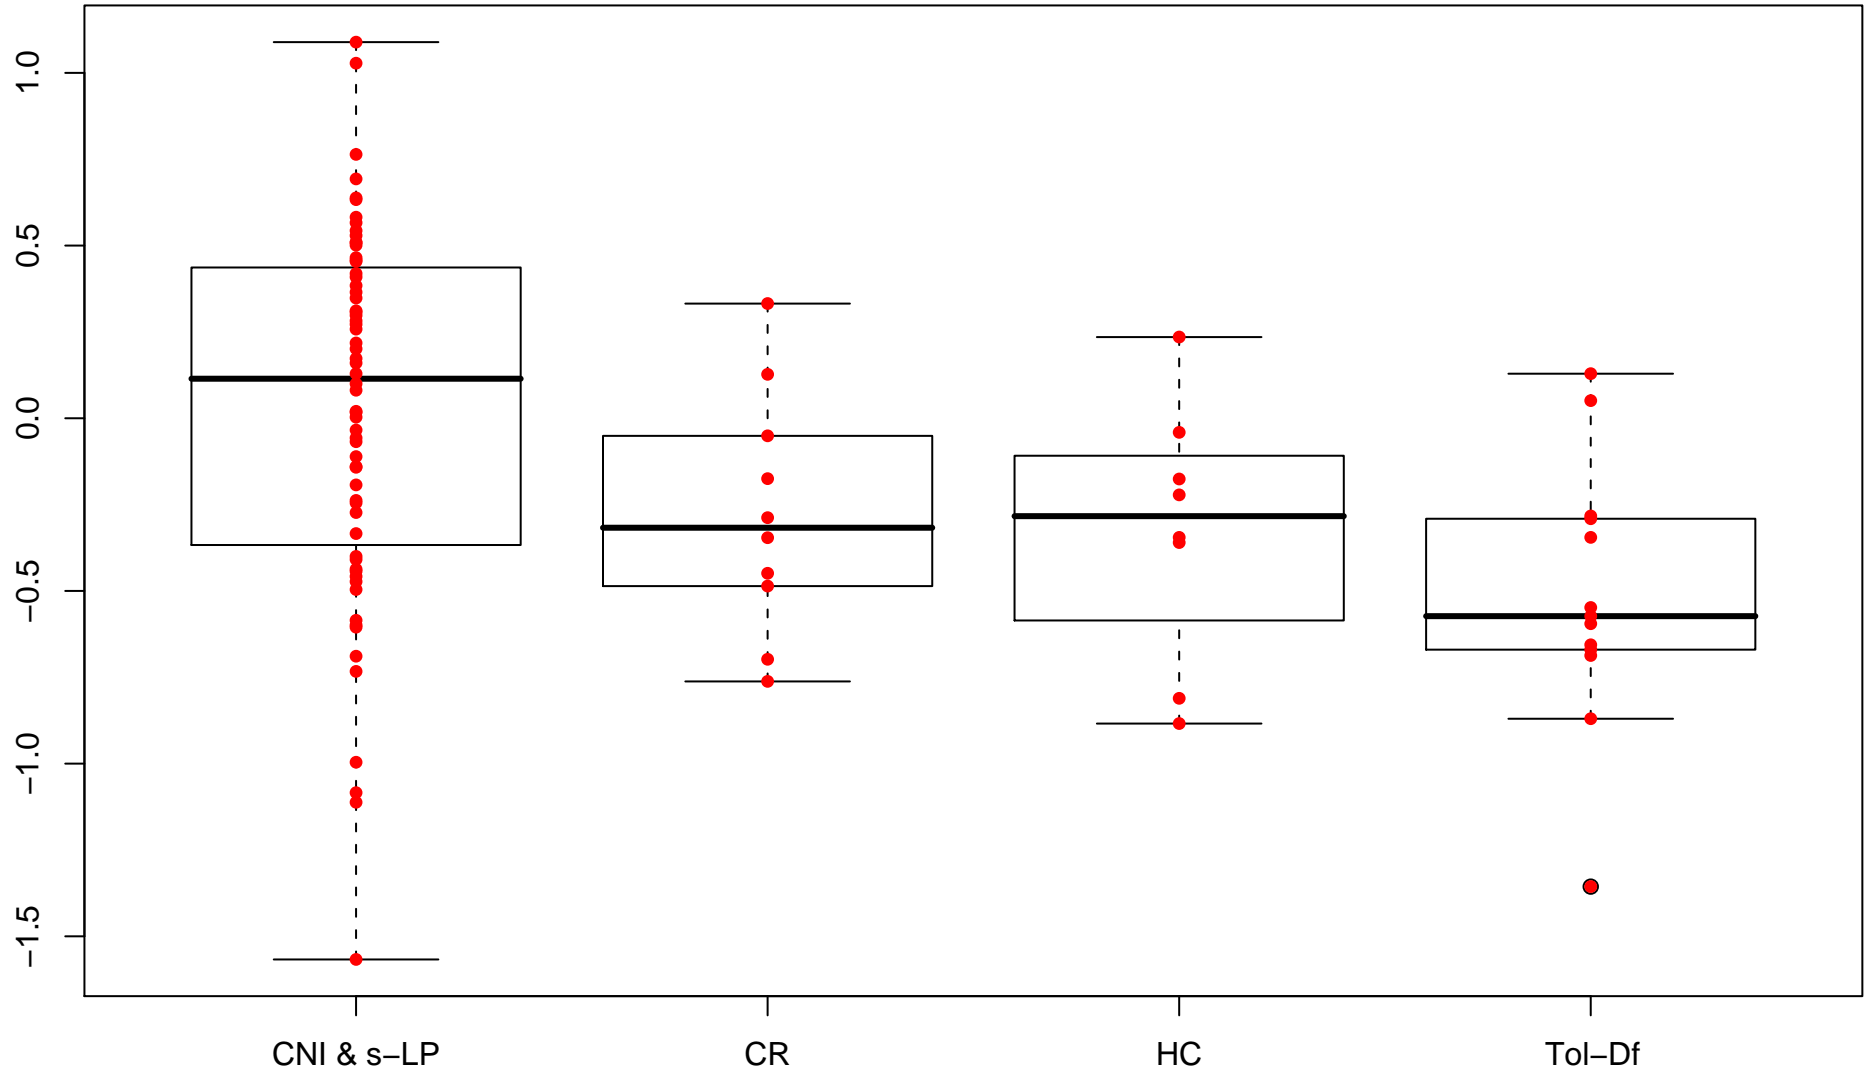

Rank 226 : SFT2D3  
0.0007632

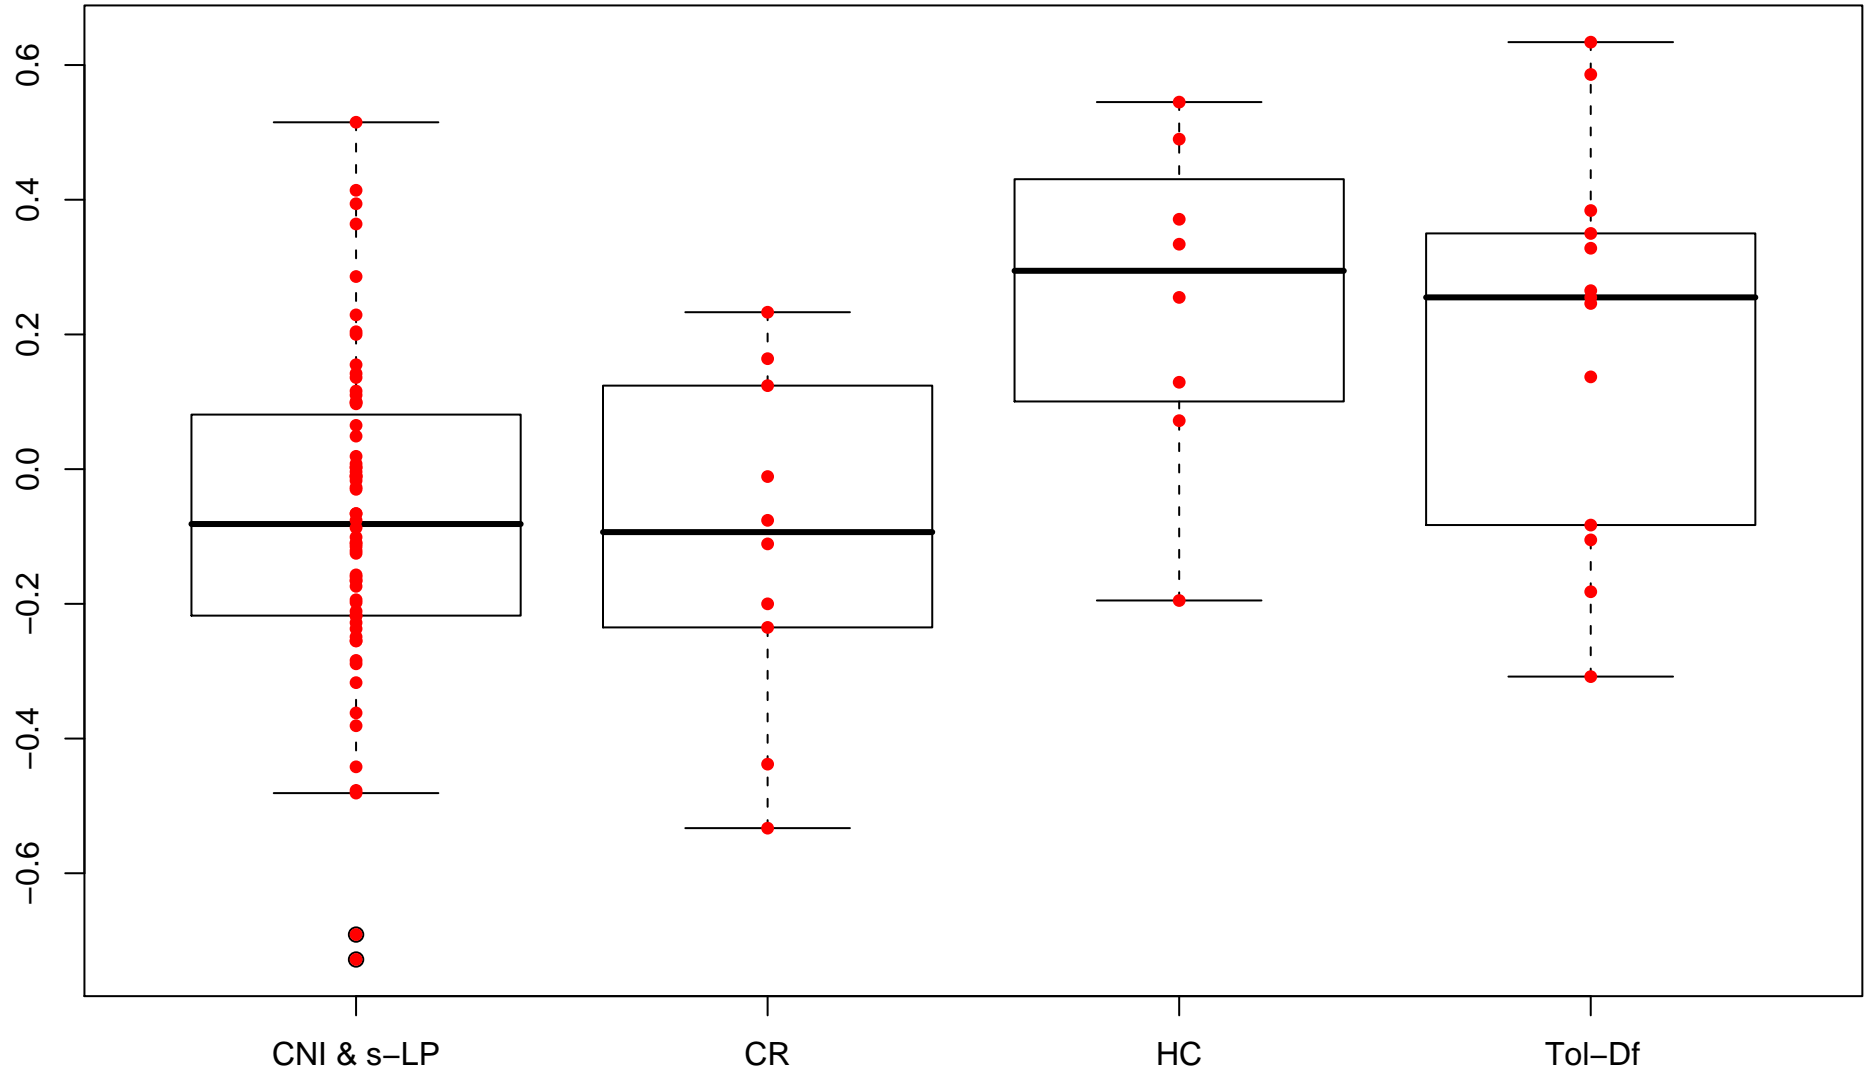



Rank 227 : C5ORF28  
0.0007689

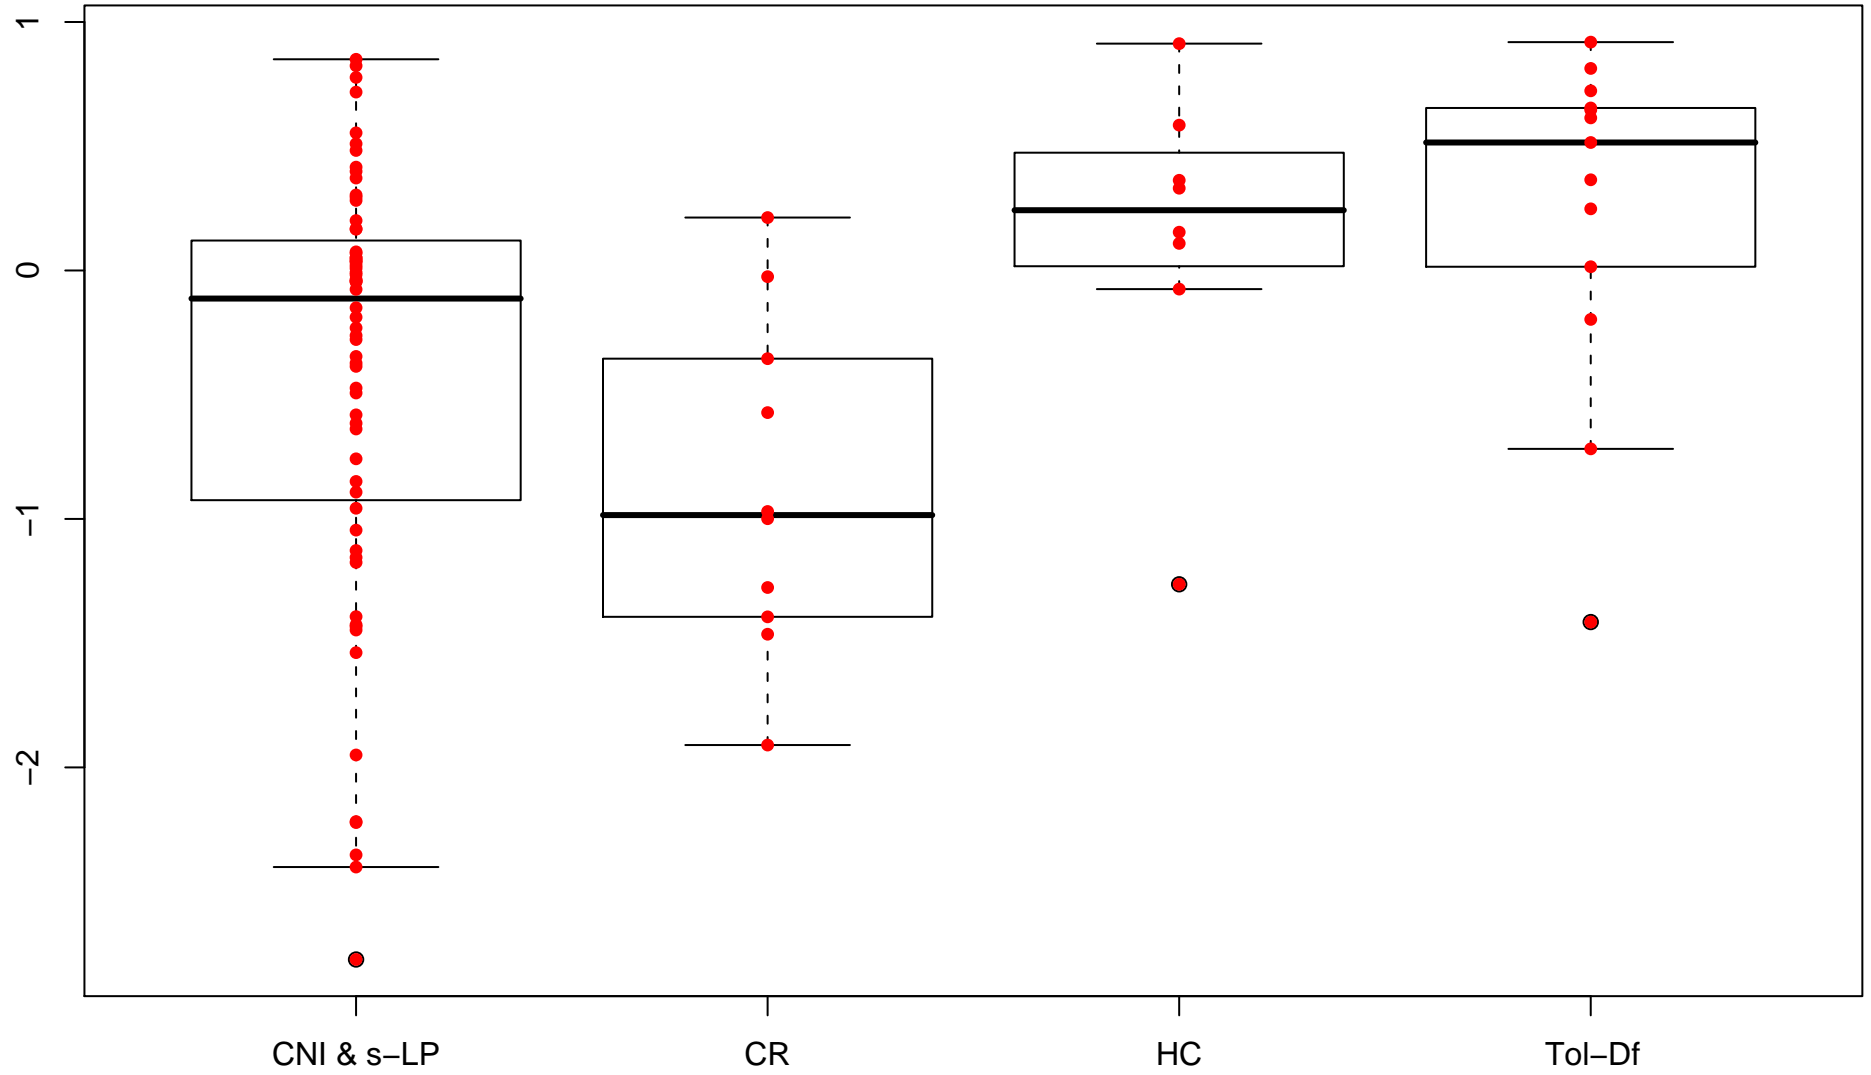

Rank 228 : STX11  
0.0007771

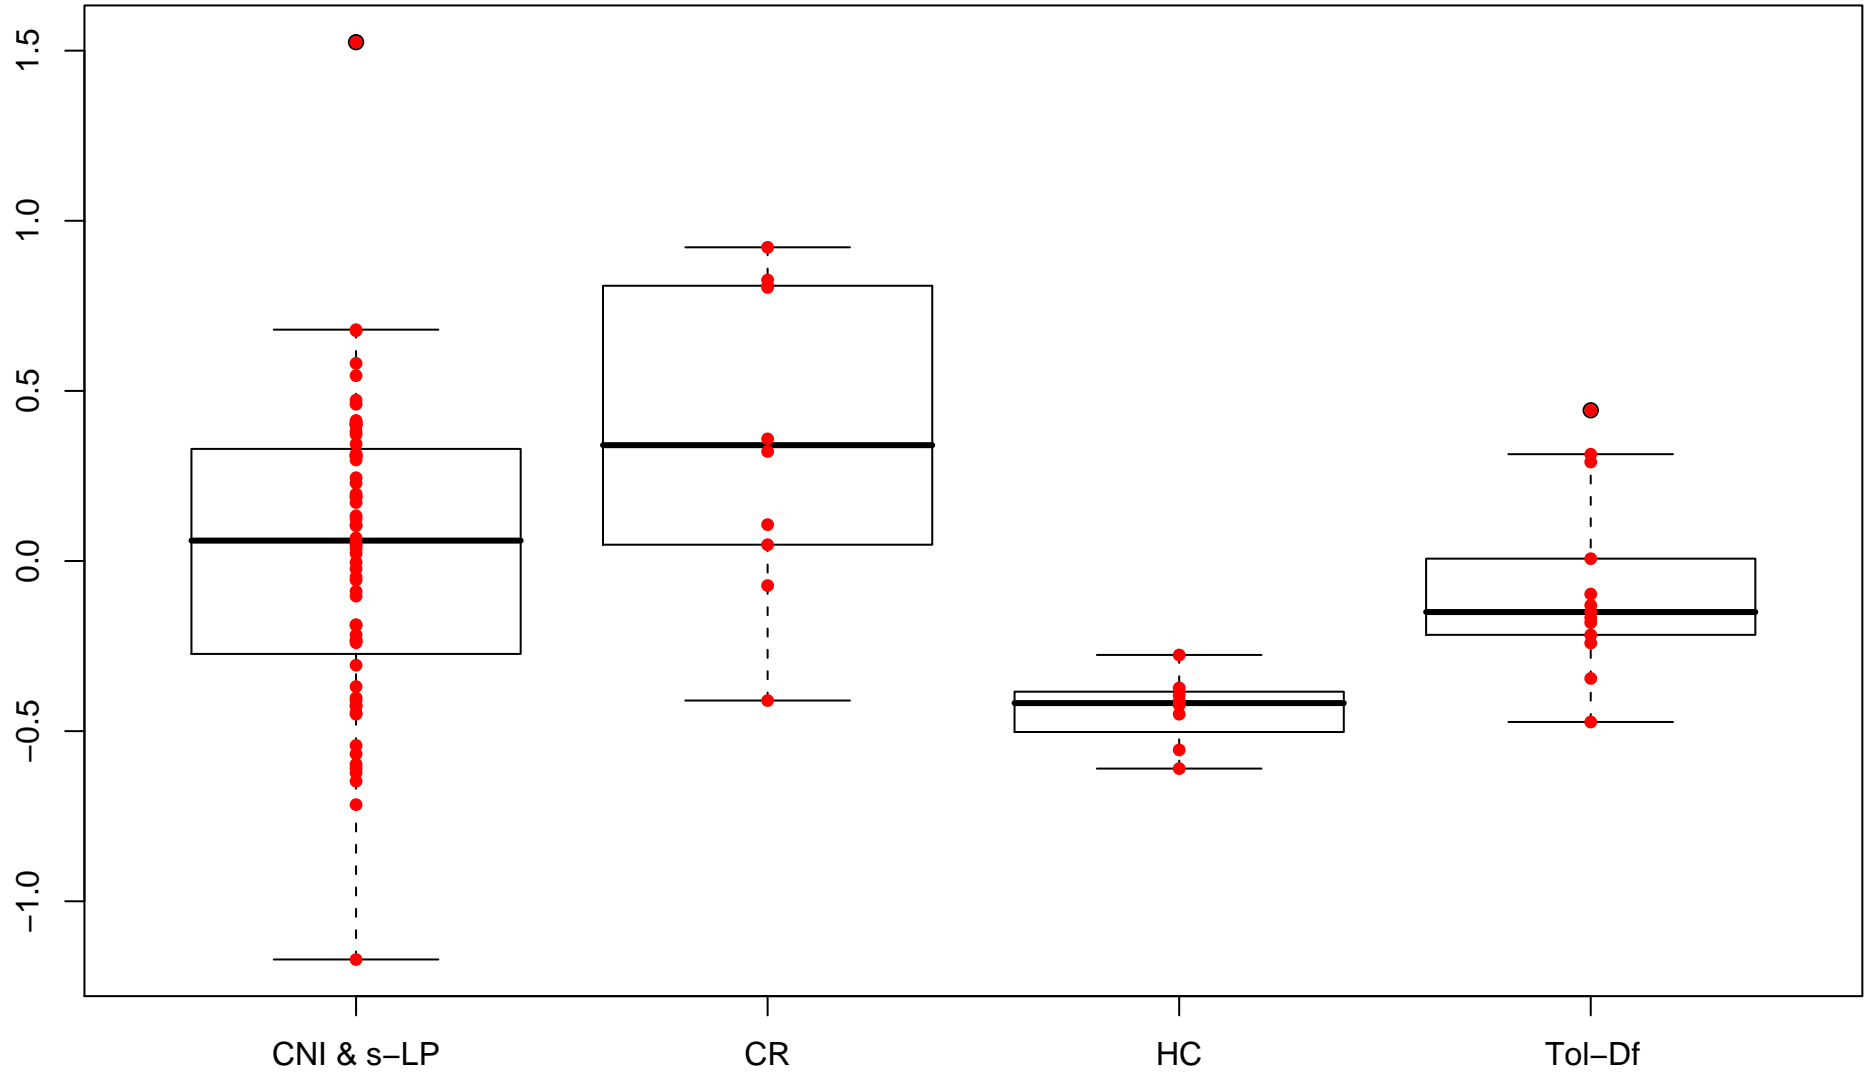

Rank 229 : ITGA1  
0.0007853

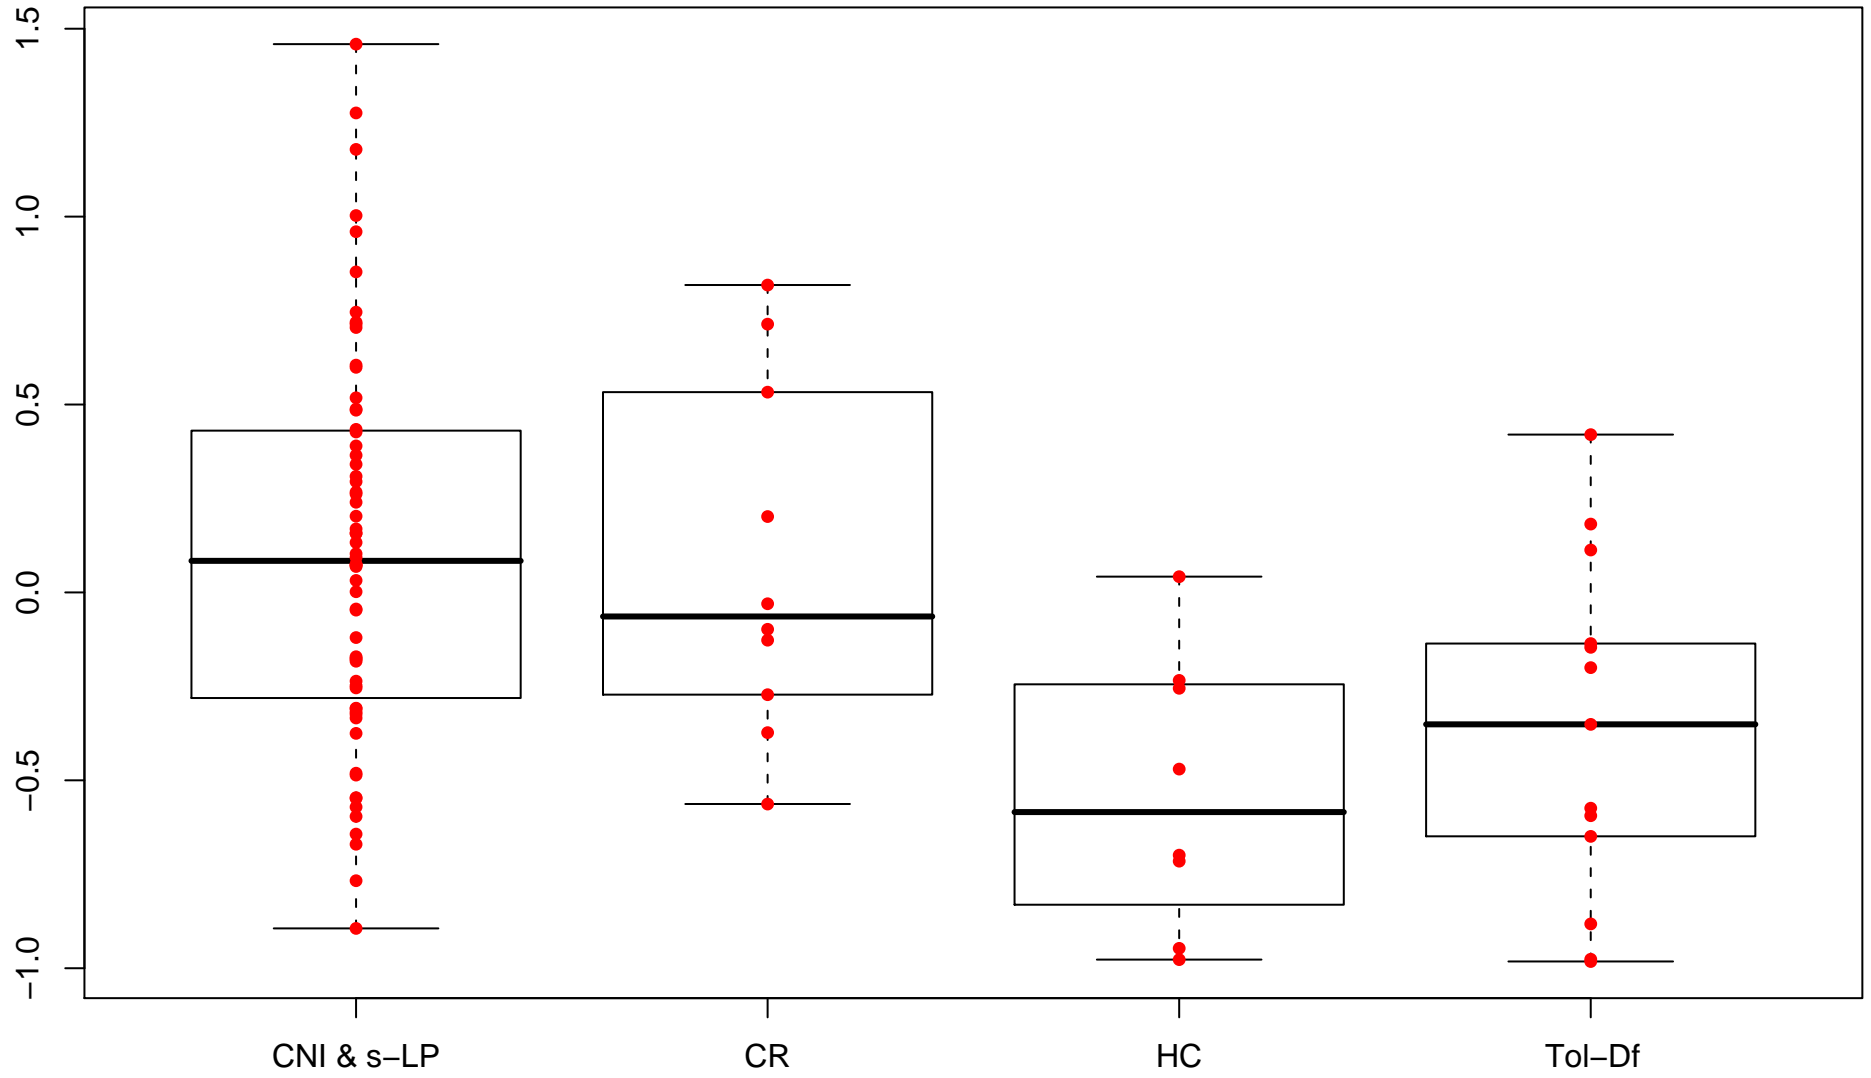

Rank 230 : PHLDB2  
0.0007932

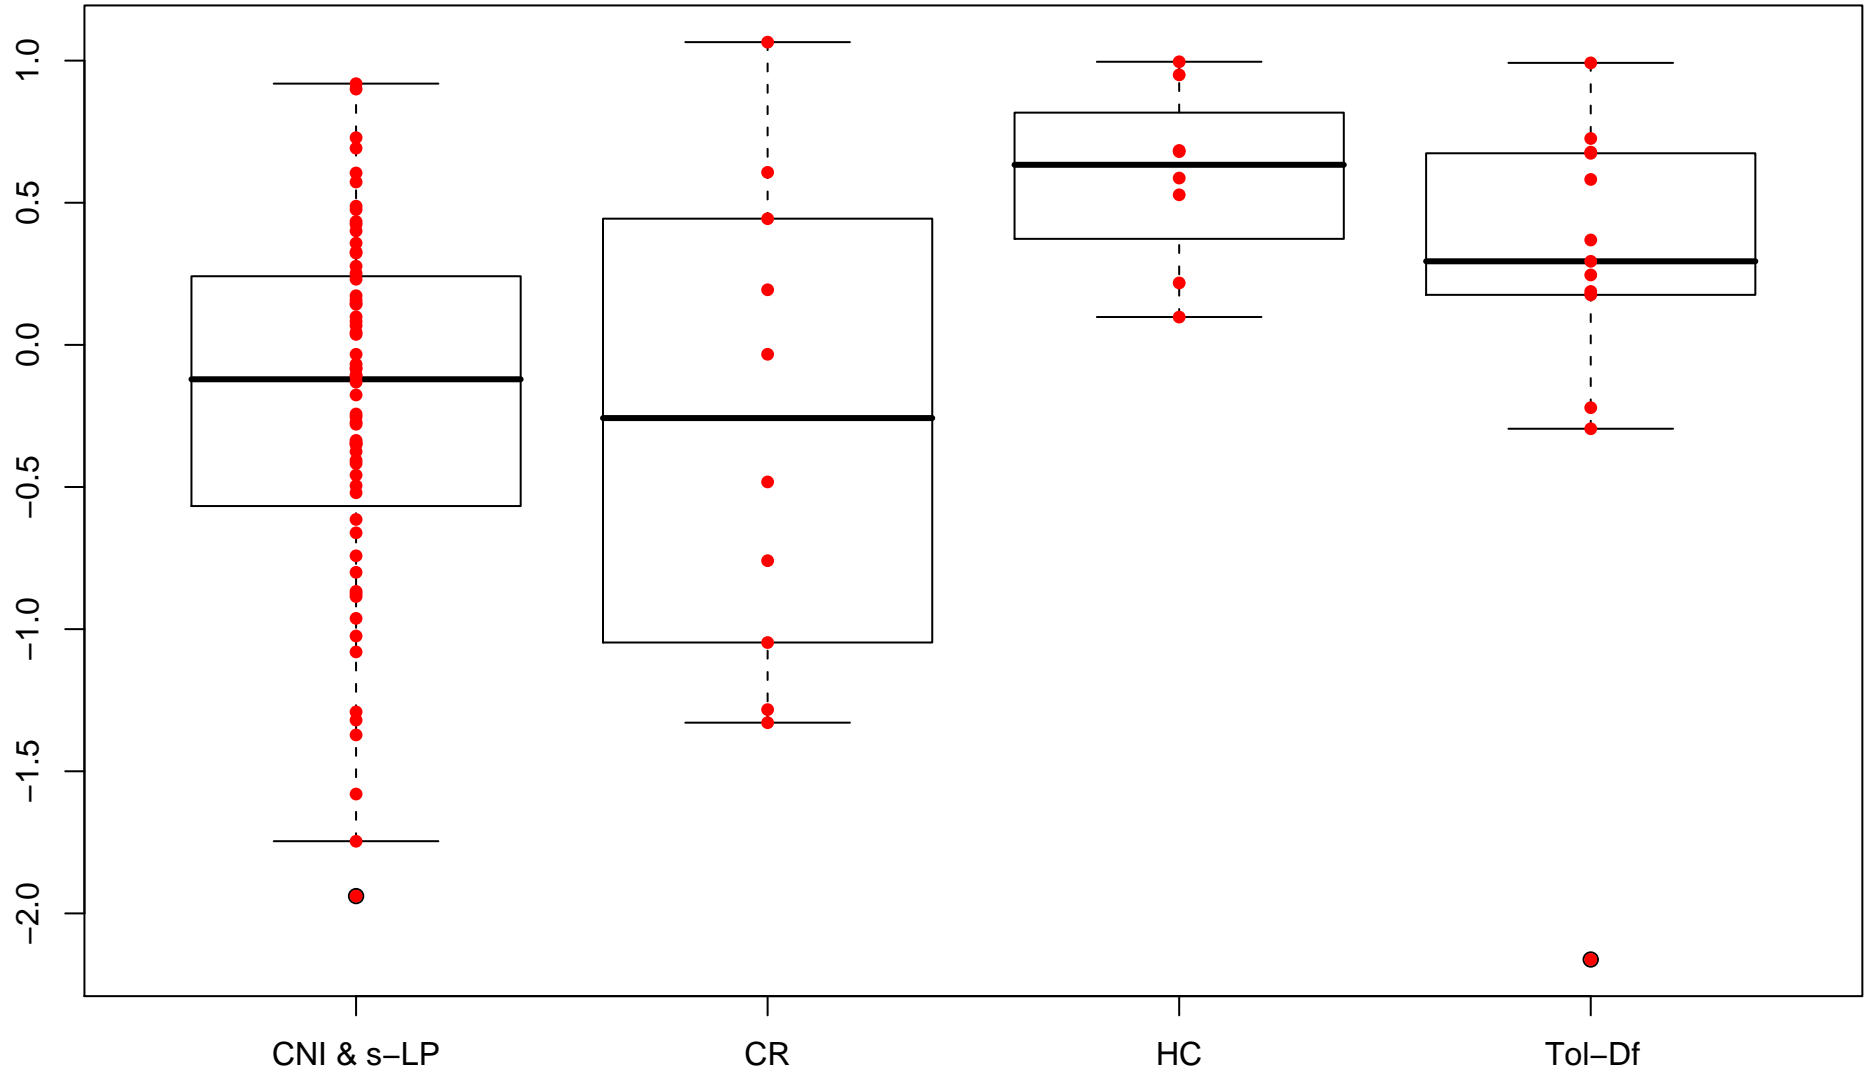

Rank 231 : A\_23\_P399604  
0.0007998

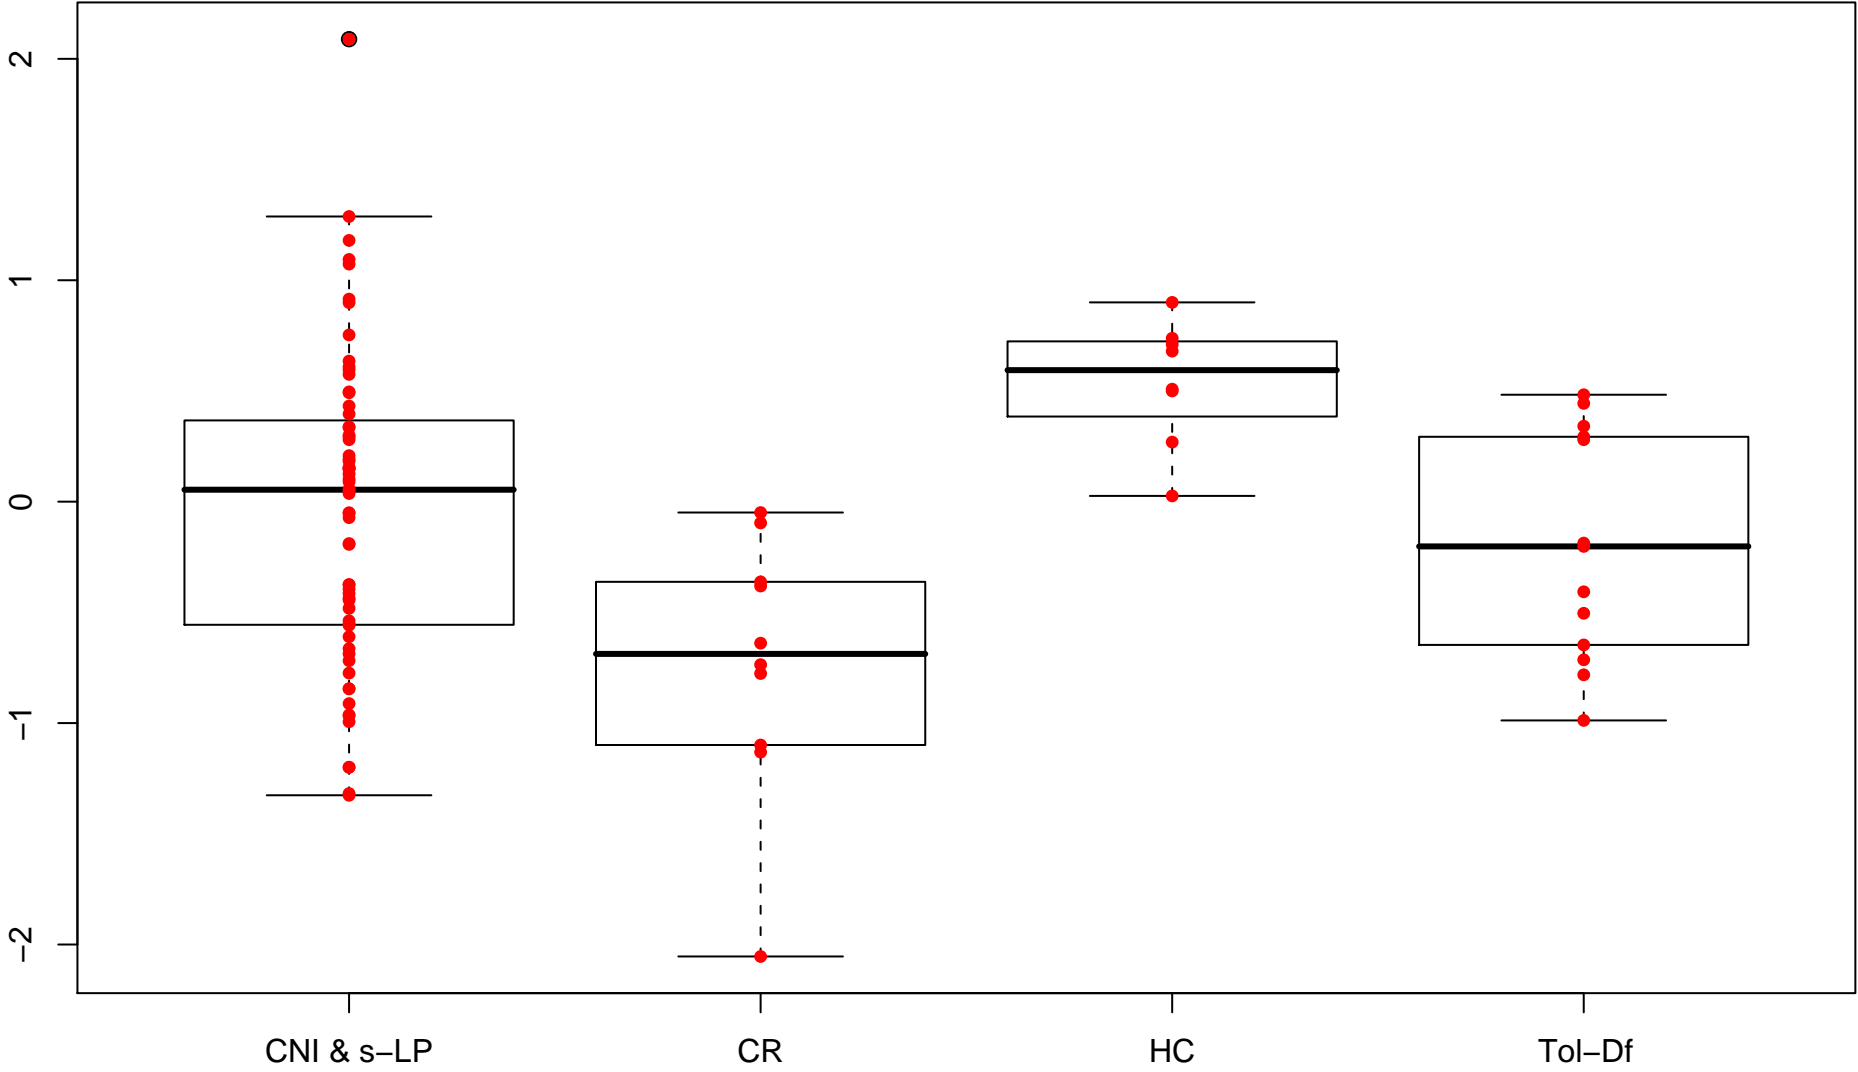

Rank 232 : GTL3  
0.0008345

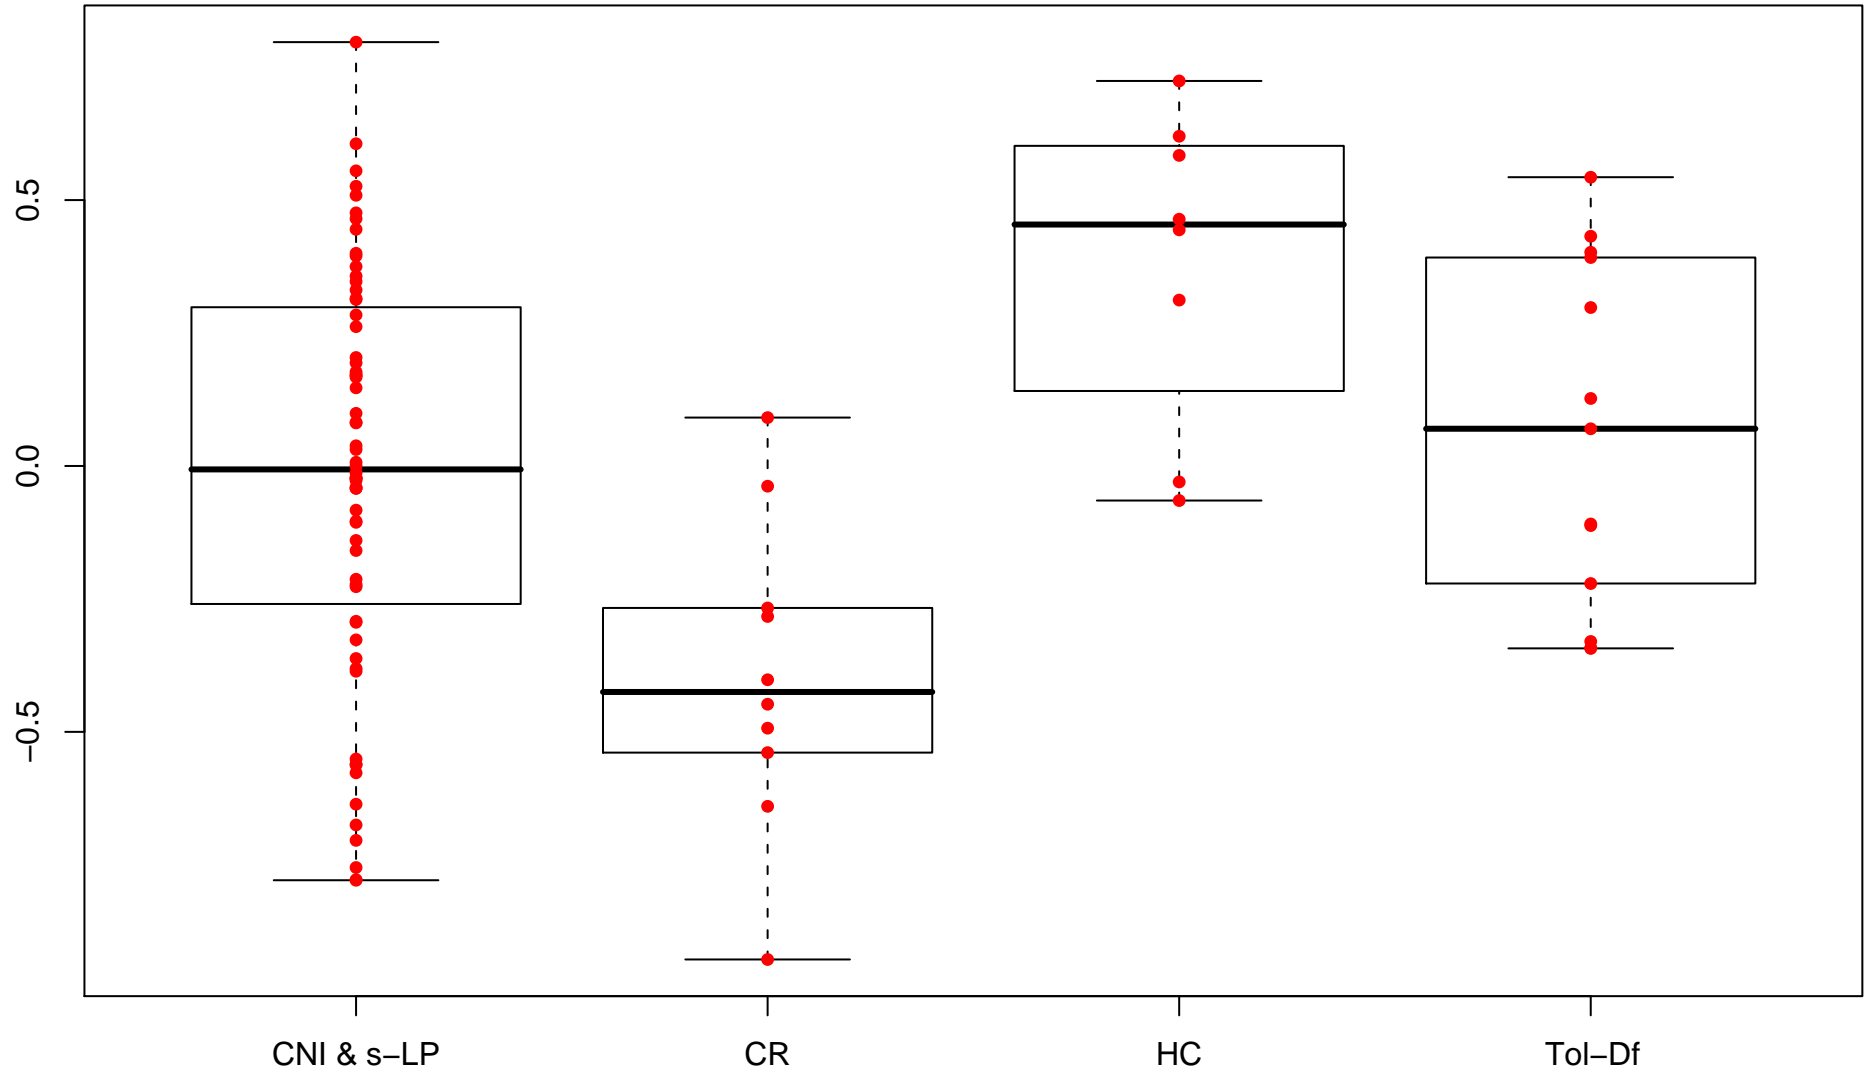

Rank 233 : ITSN2  
0.0008378

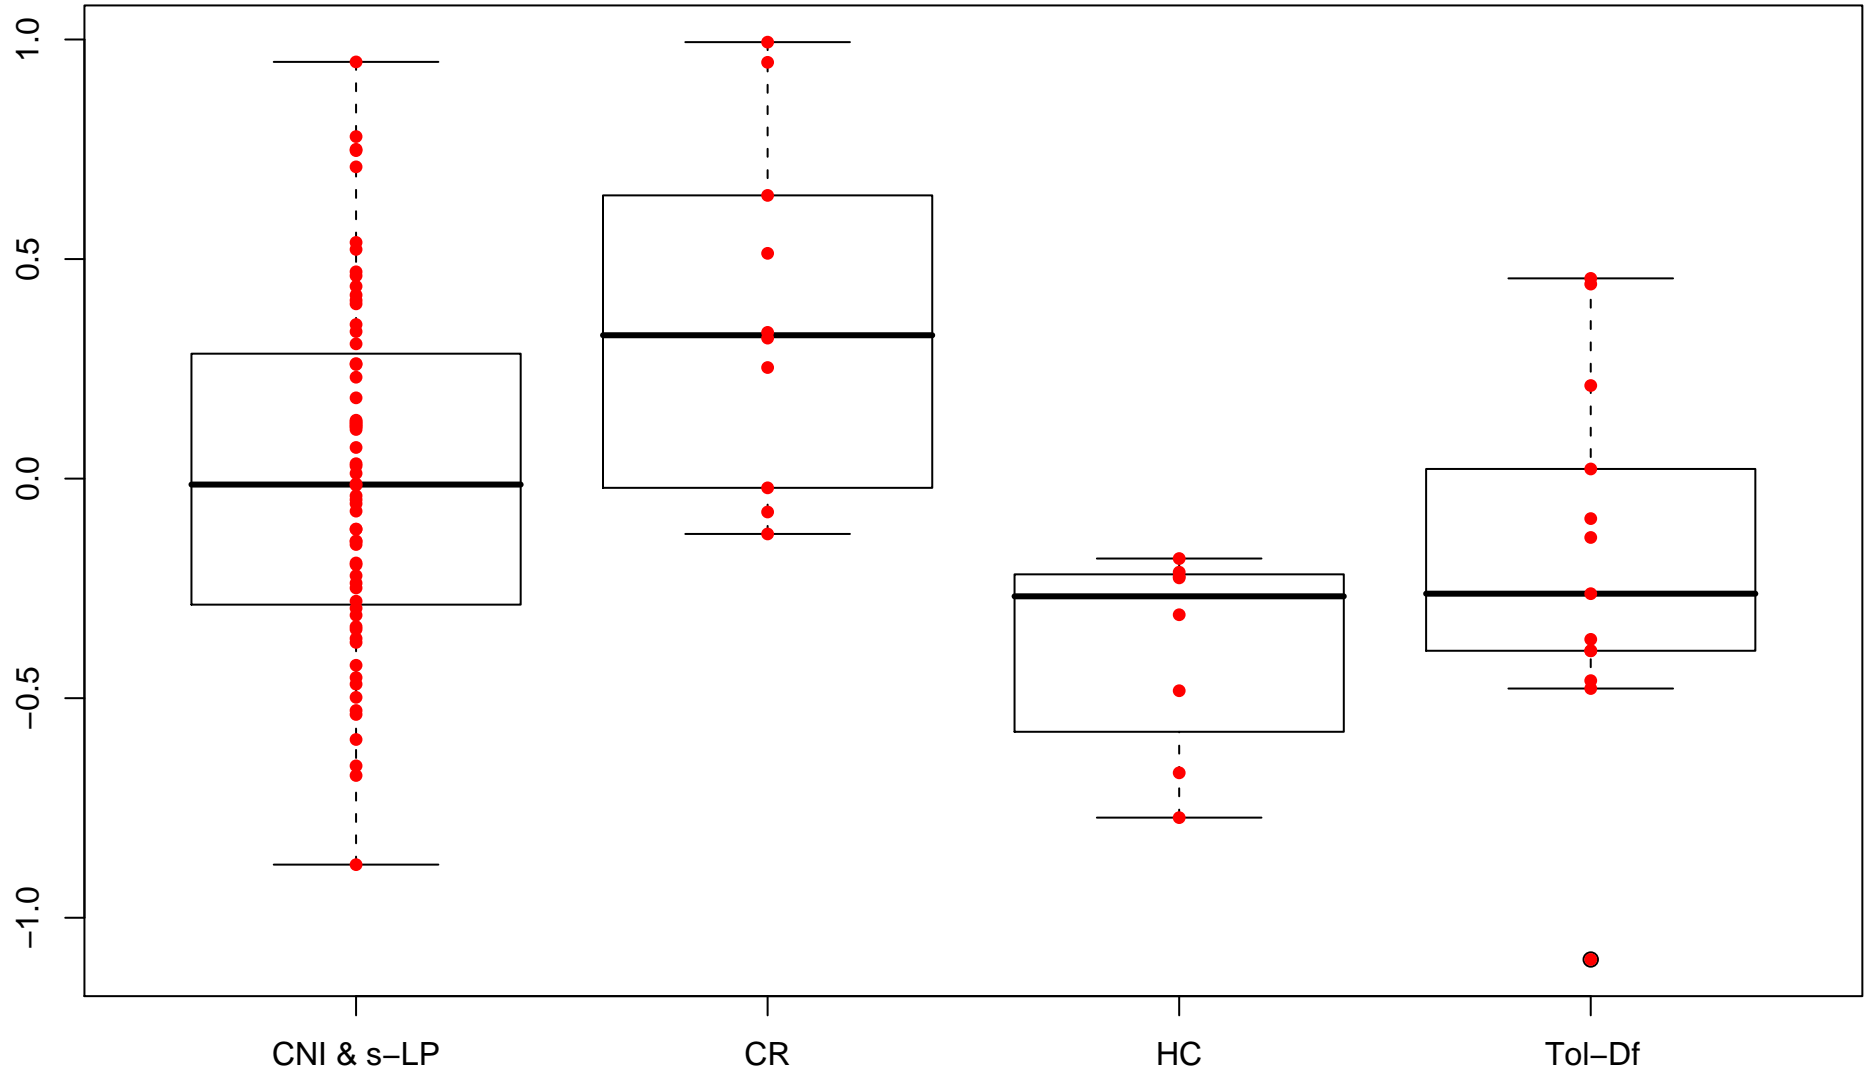

Rank 234 : ARHGEF12  
0.0008391

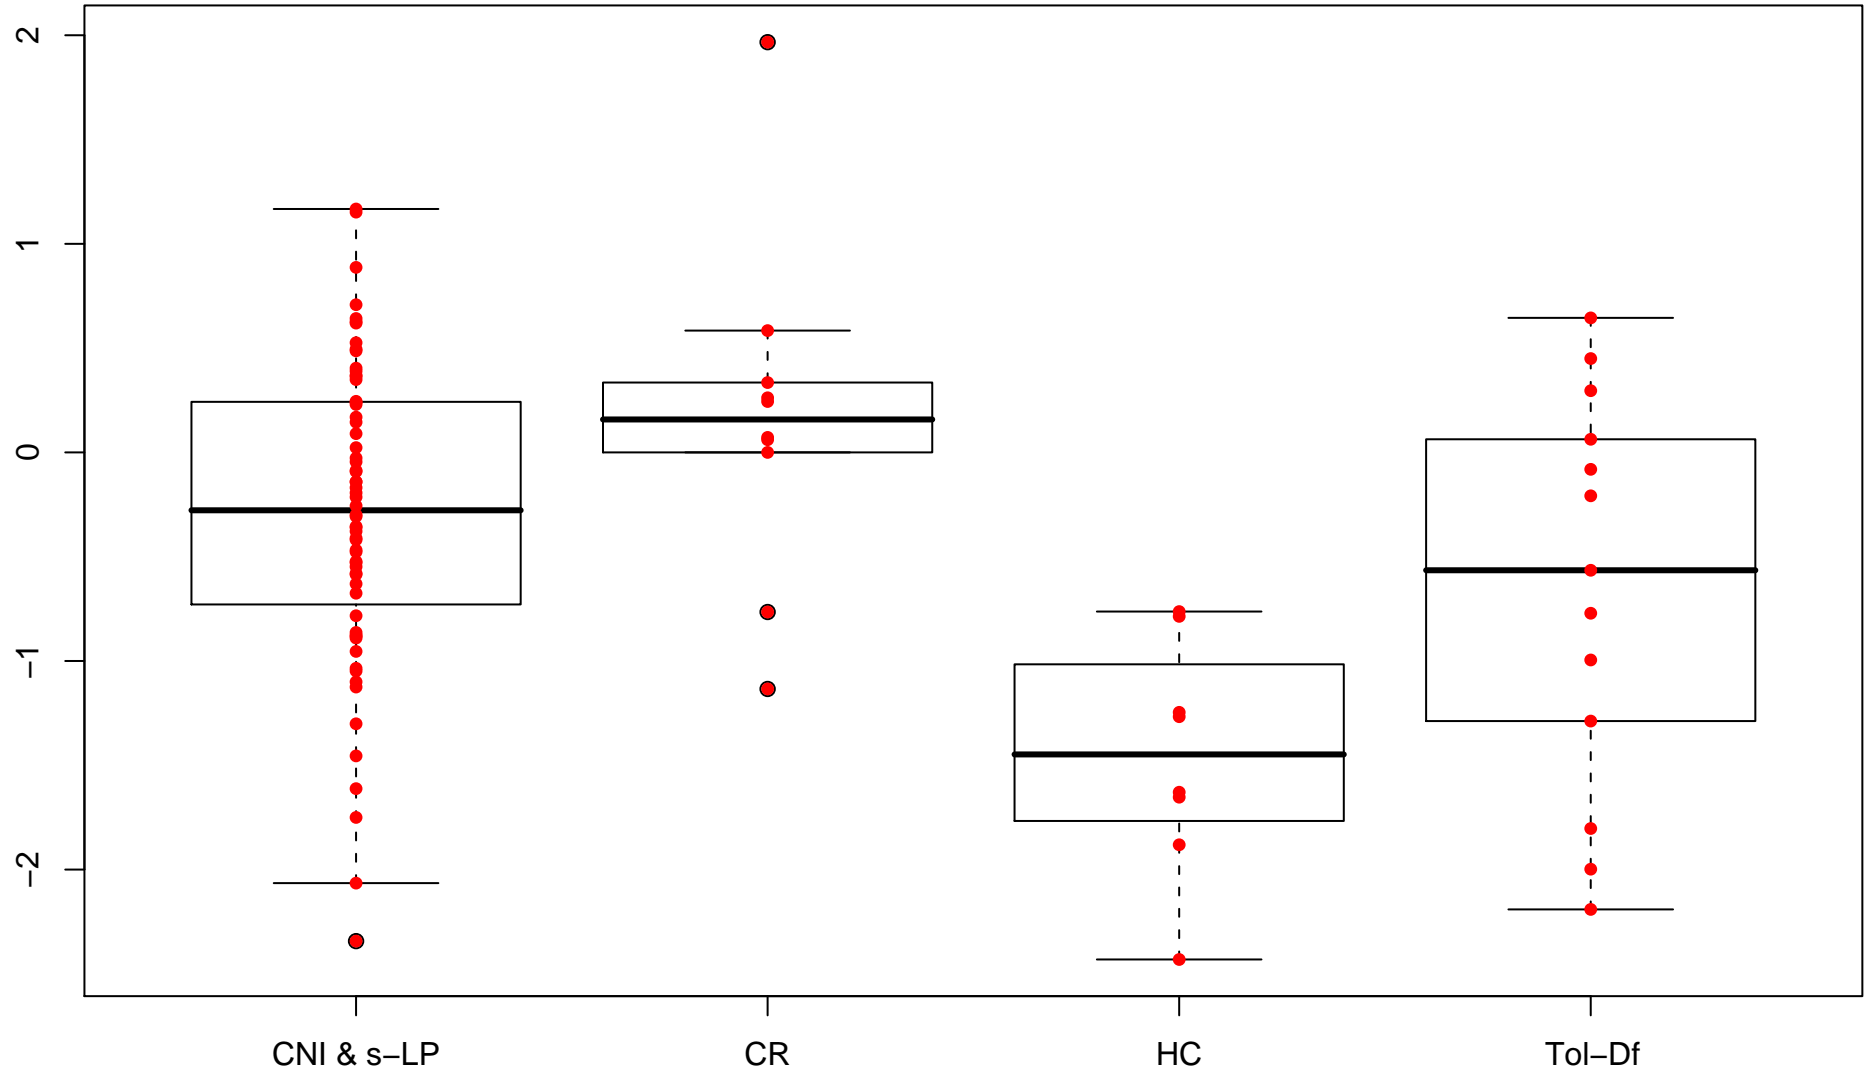



Rank 235 : LOC100131941  
0.0008459

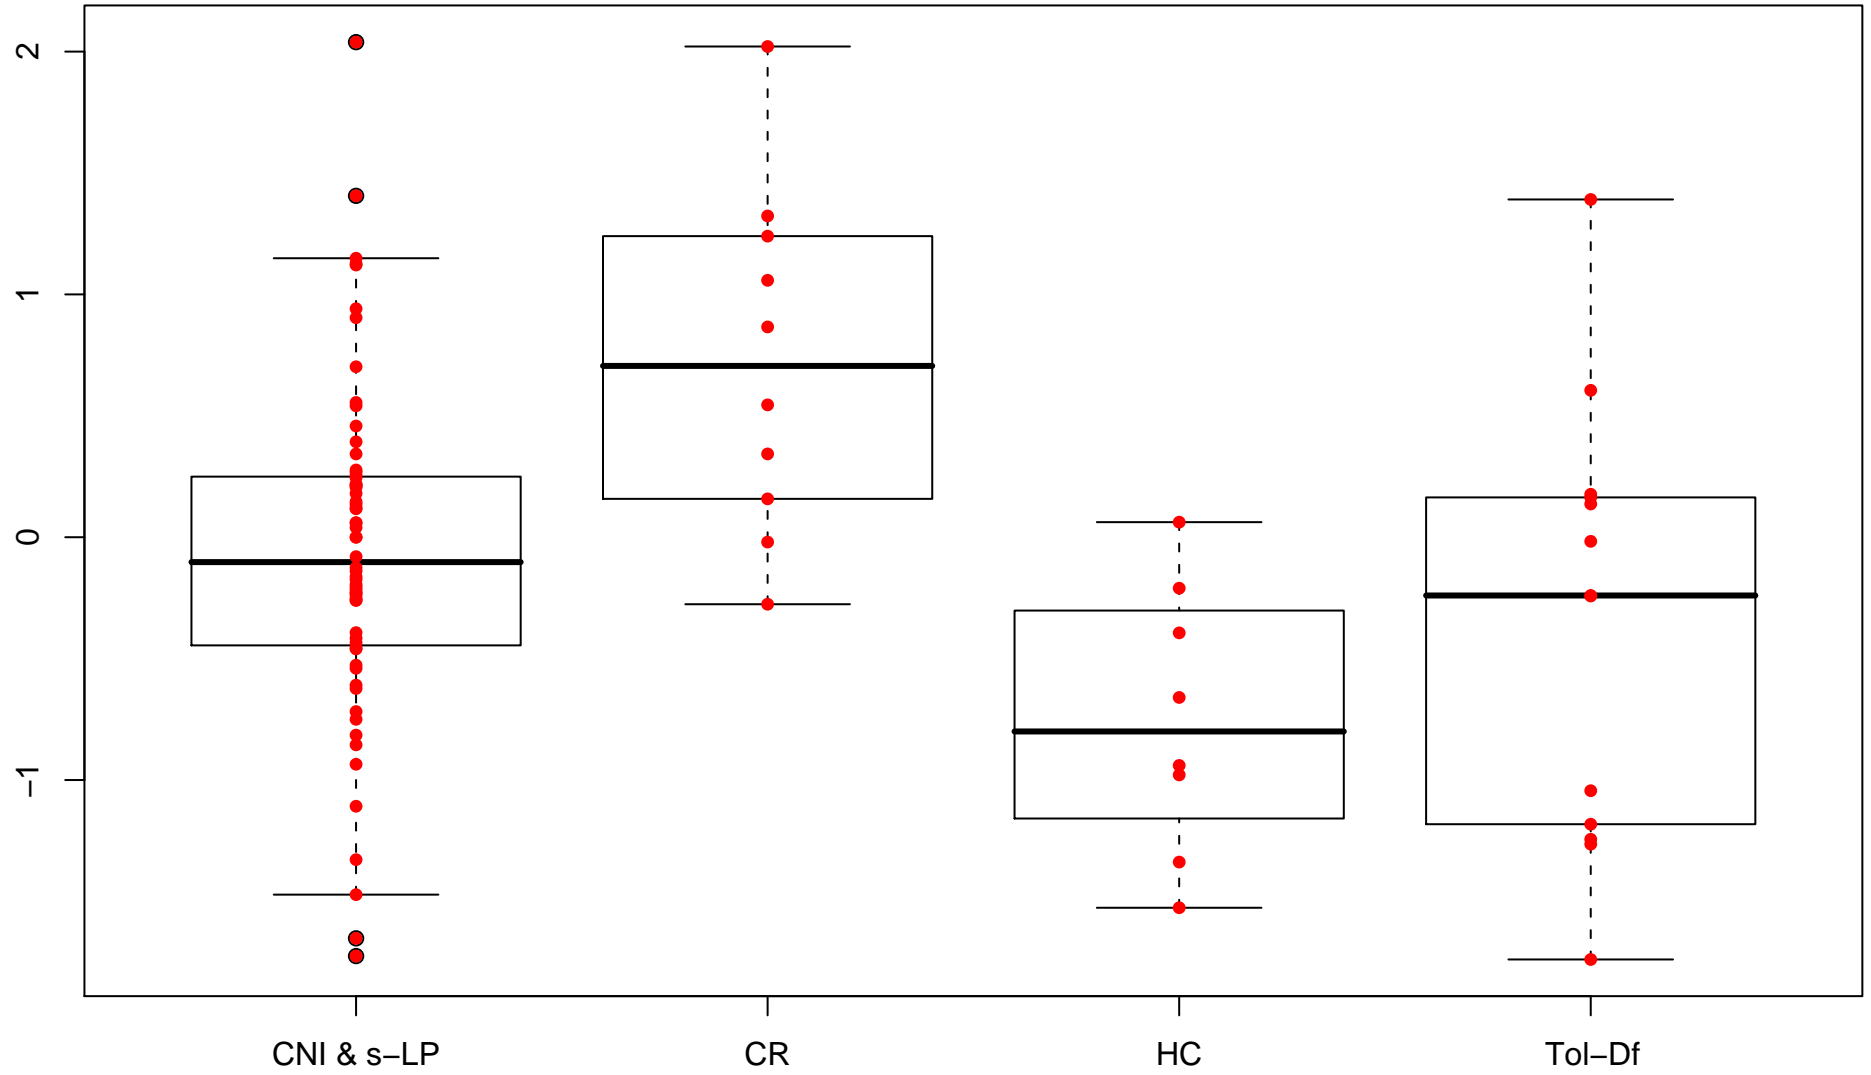

Rank 236 : MUC8  
0.0008464

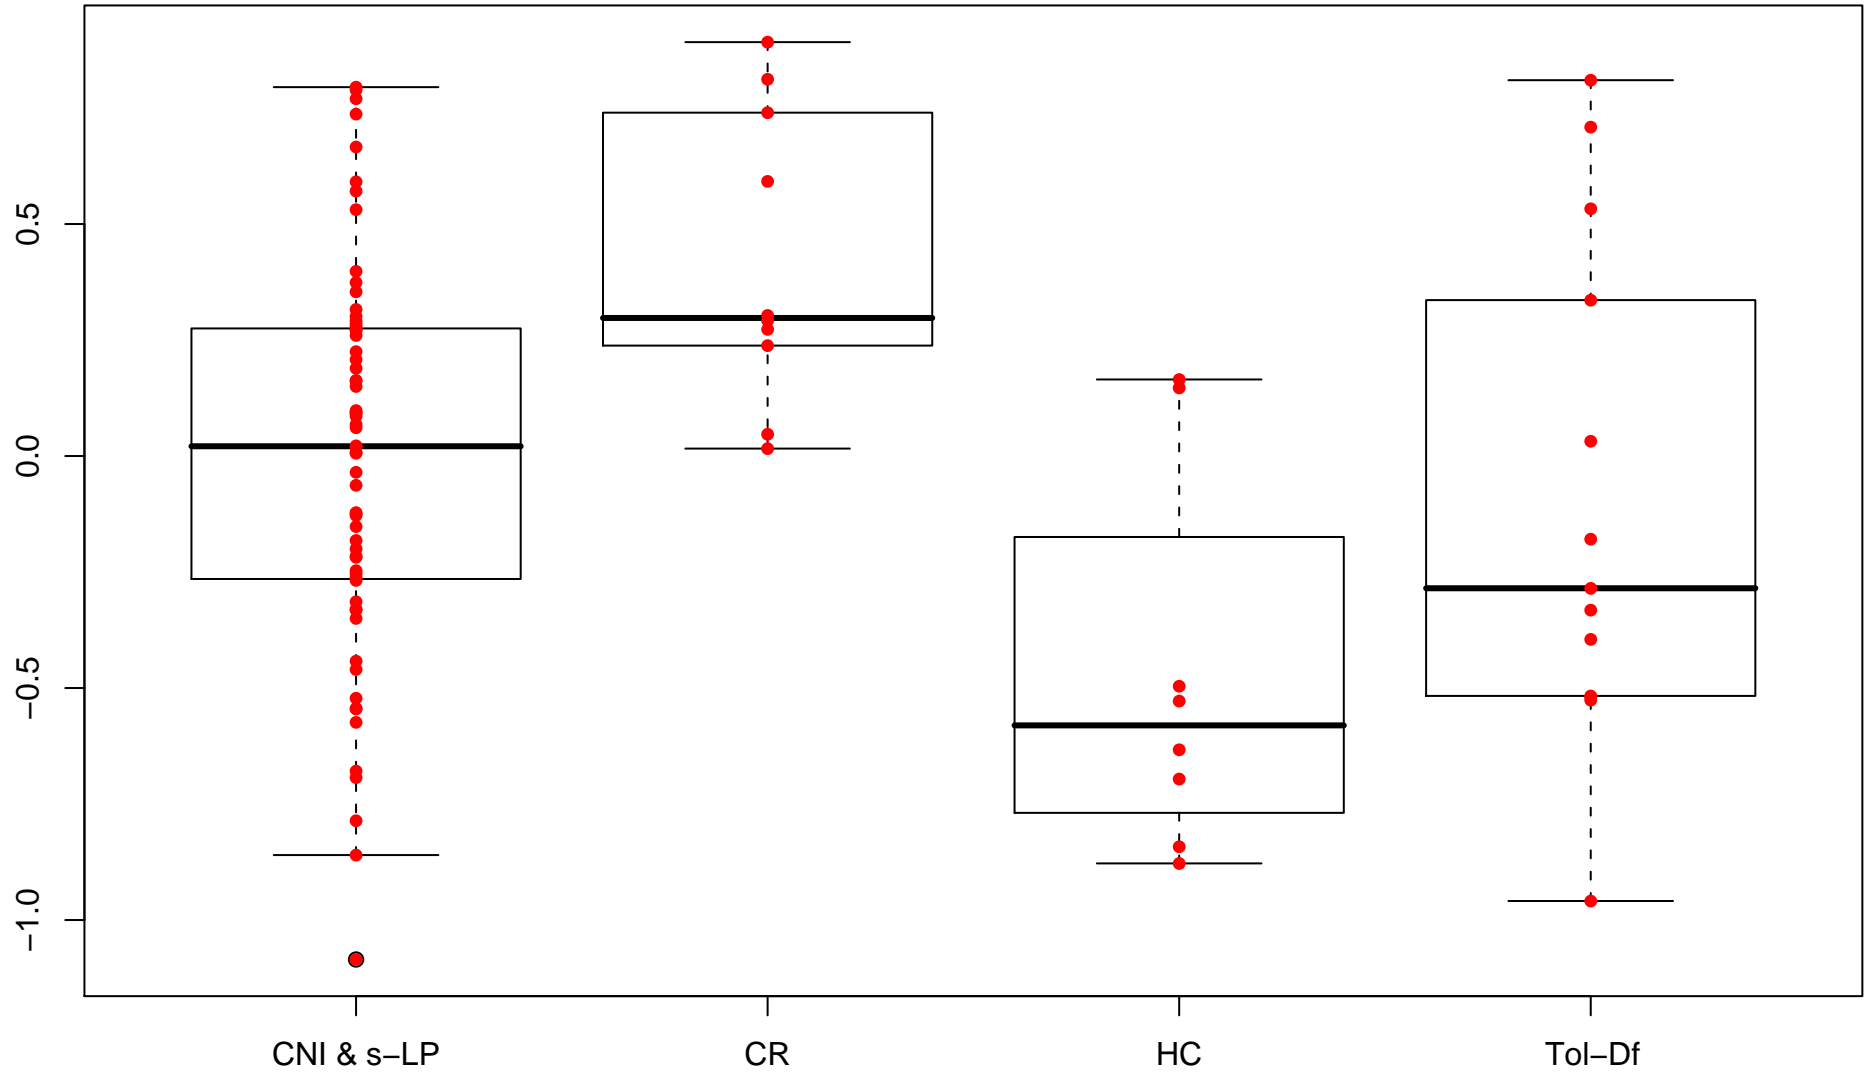

Rank 237 : ORM2  
0.0008574

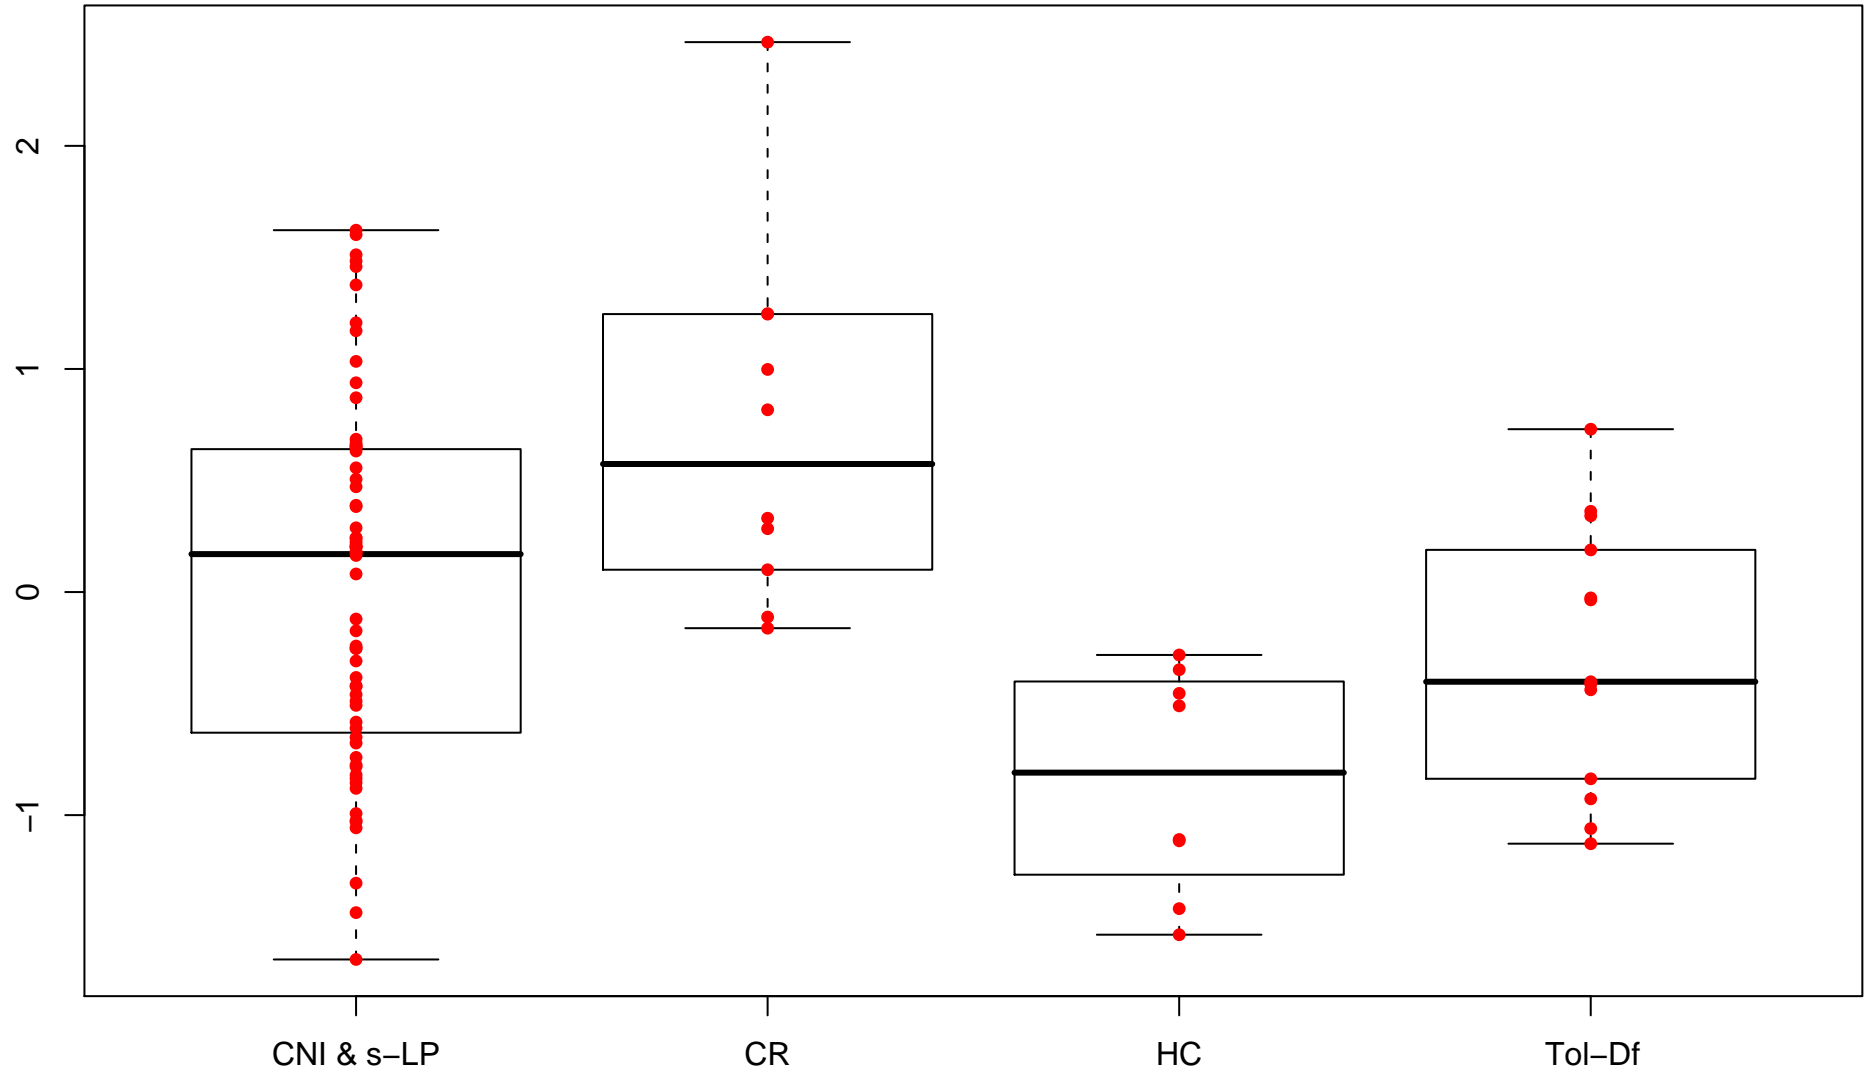

Rank 238 : FLJ22662  
0.0008718

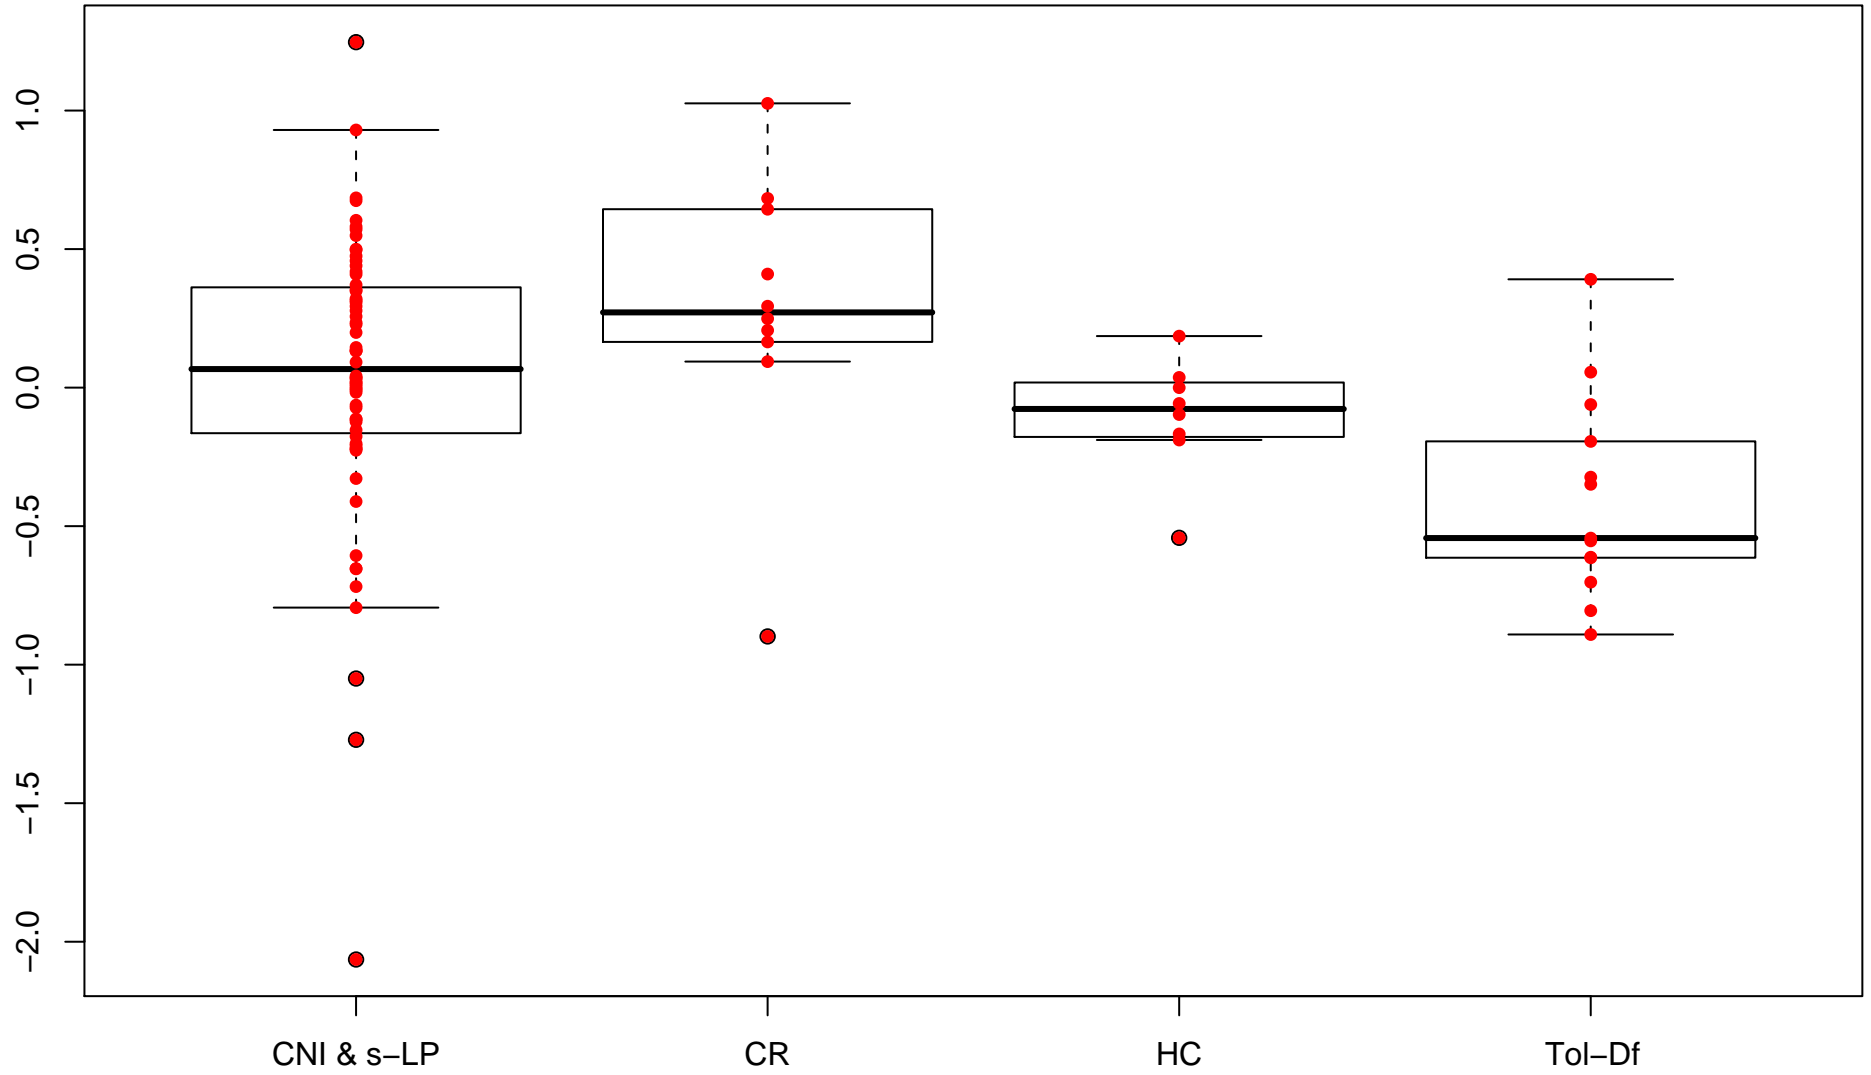

Rank 239 : APEX1  
0.0008757

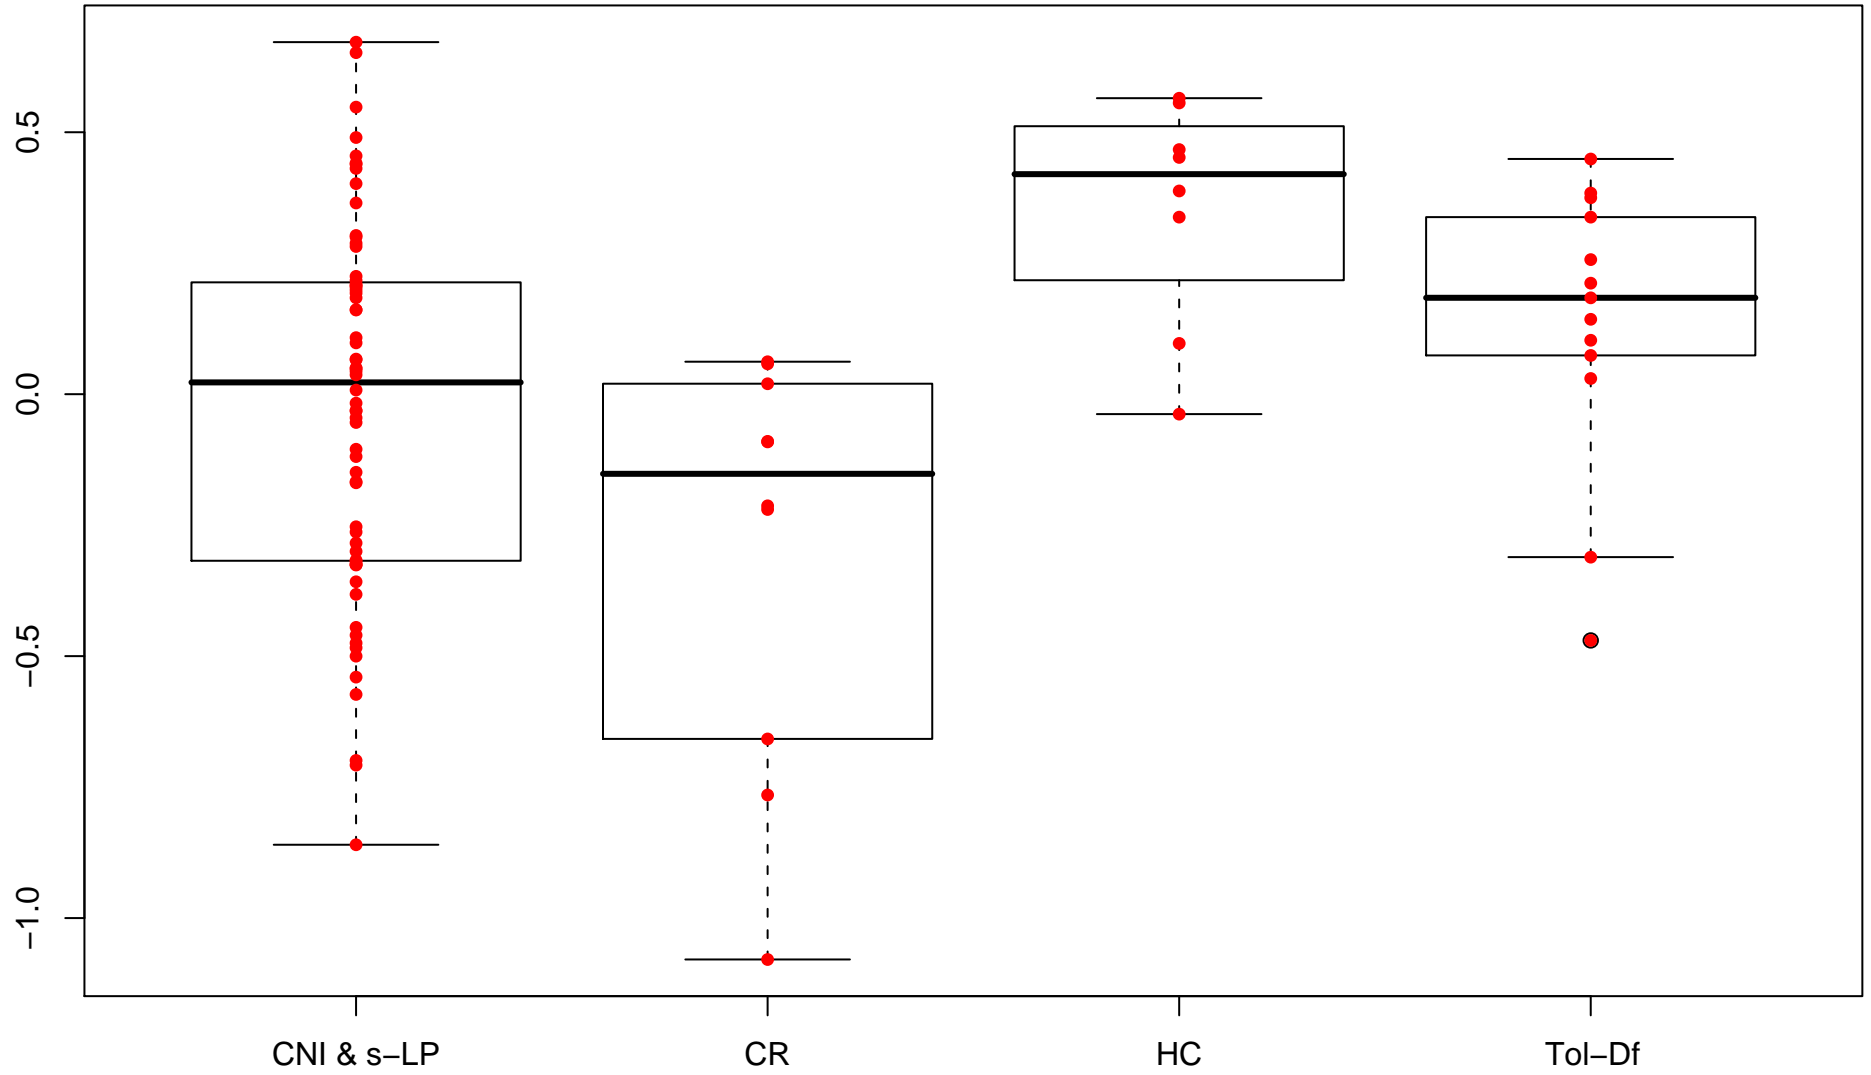

Rank 240 : RPS4Y1  
0.0008954

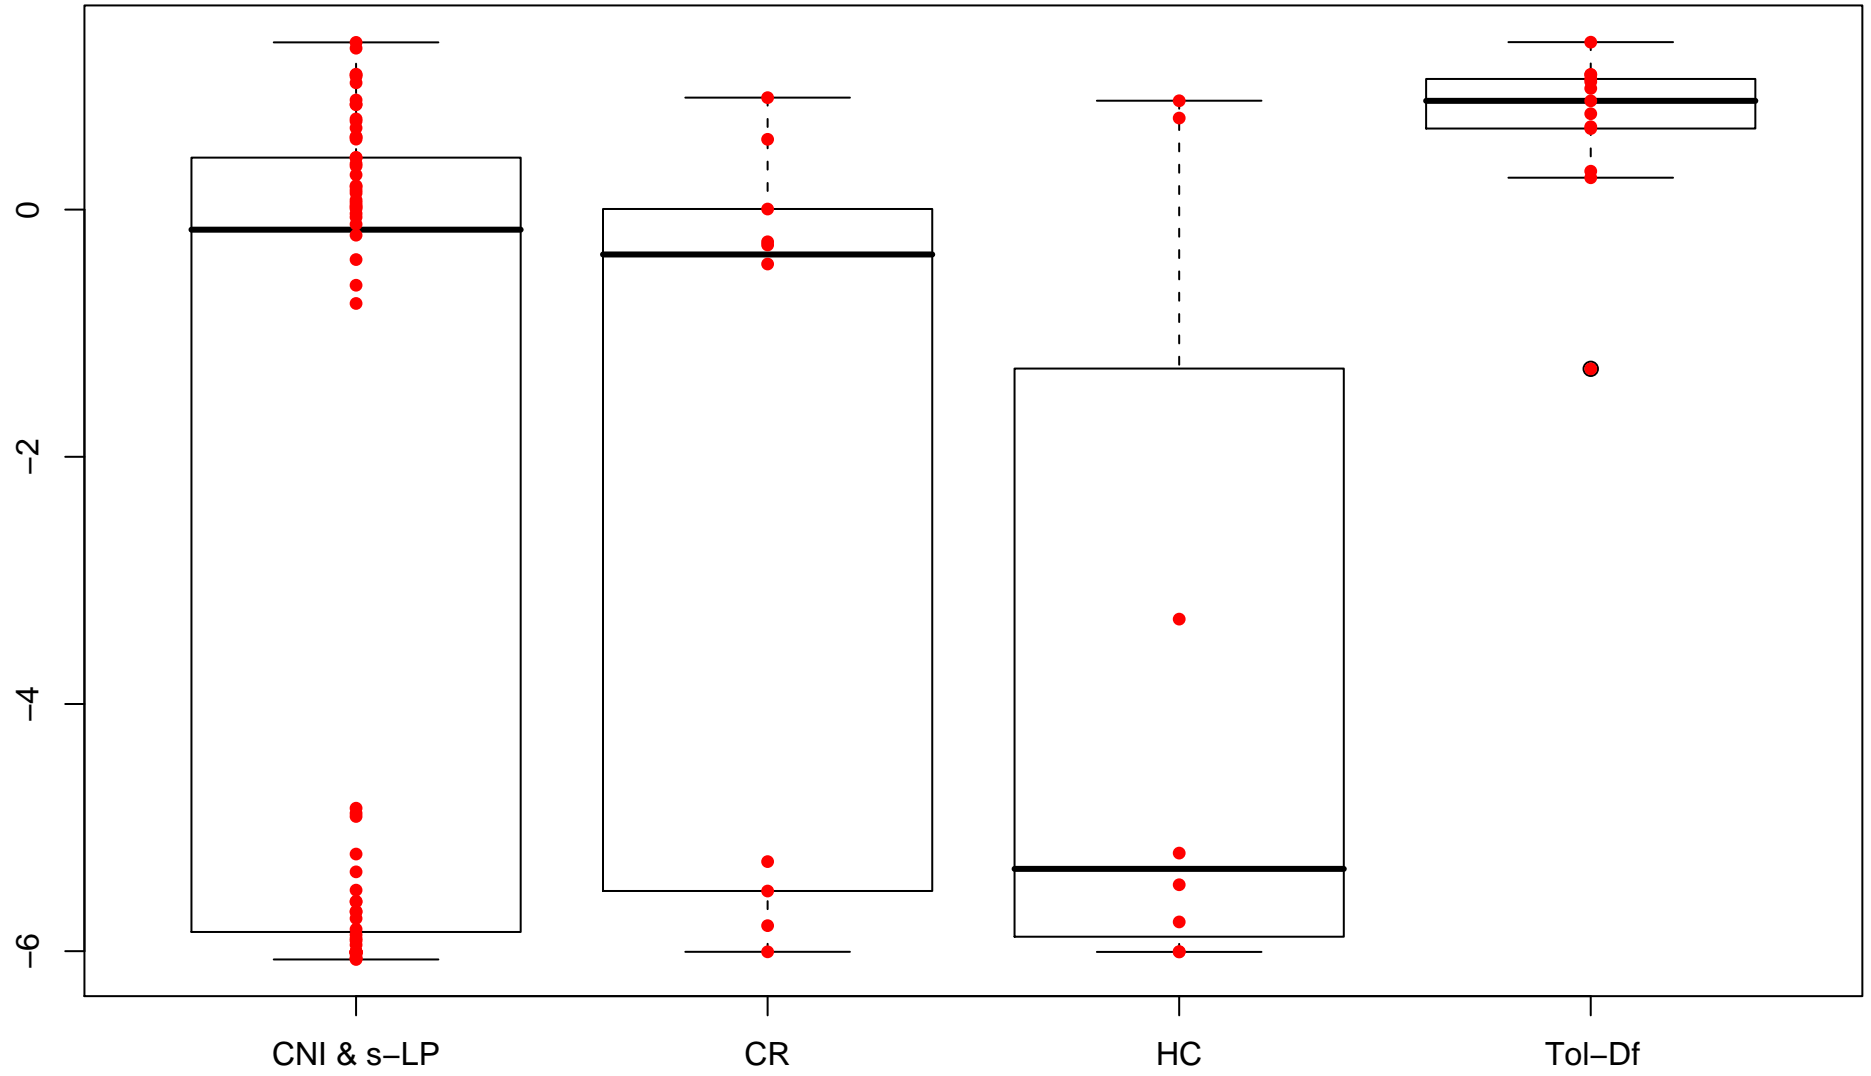

Rank 241 : LCK  
0.0009192

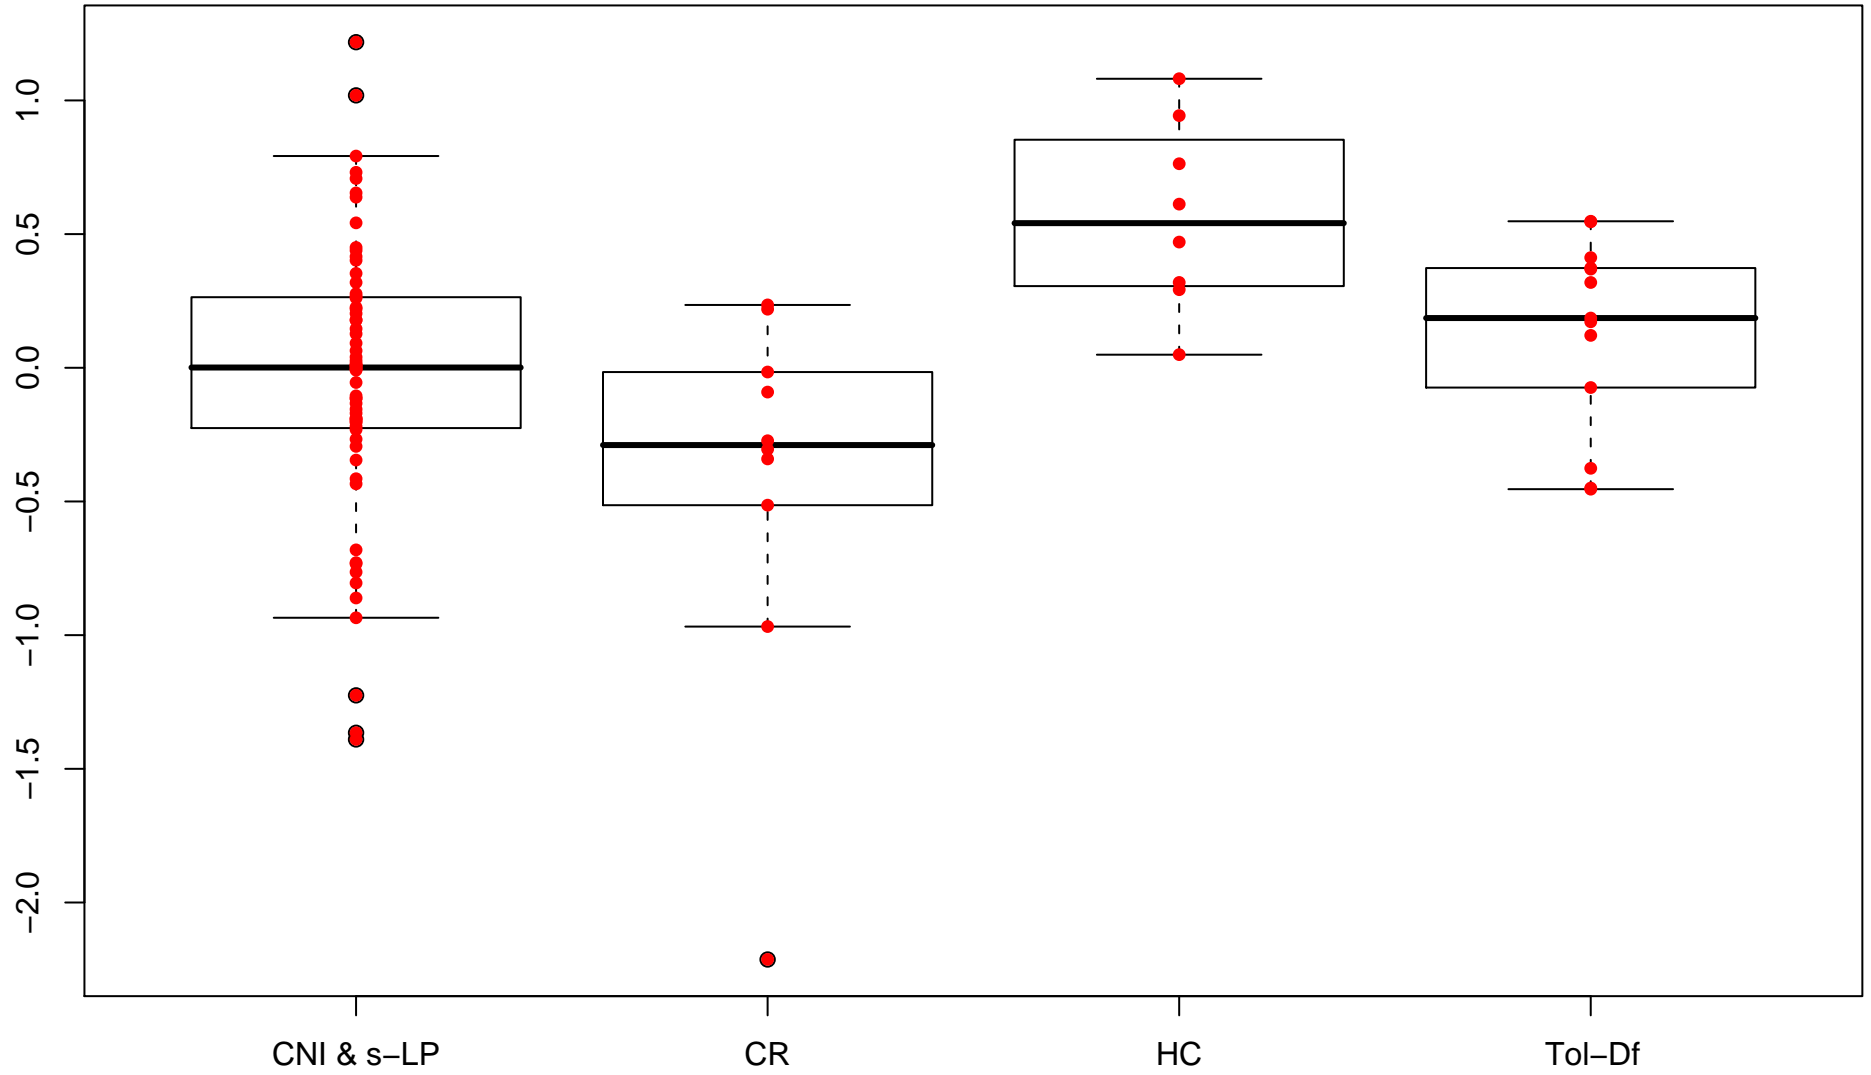

Rank 242 : LOC642897  
0.0009525

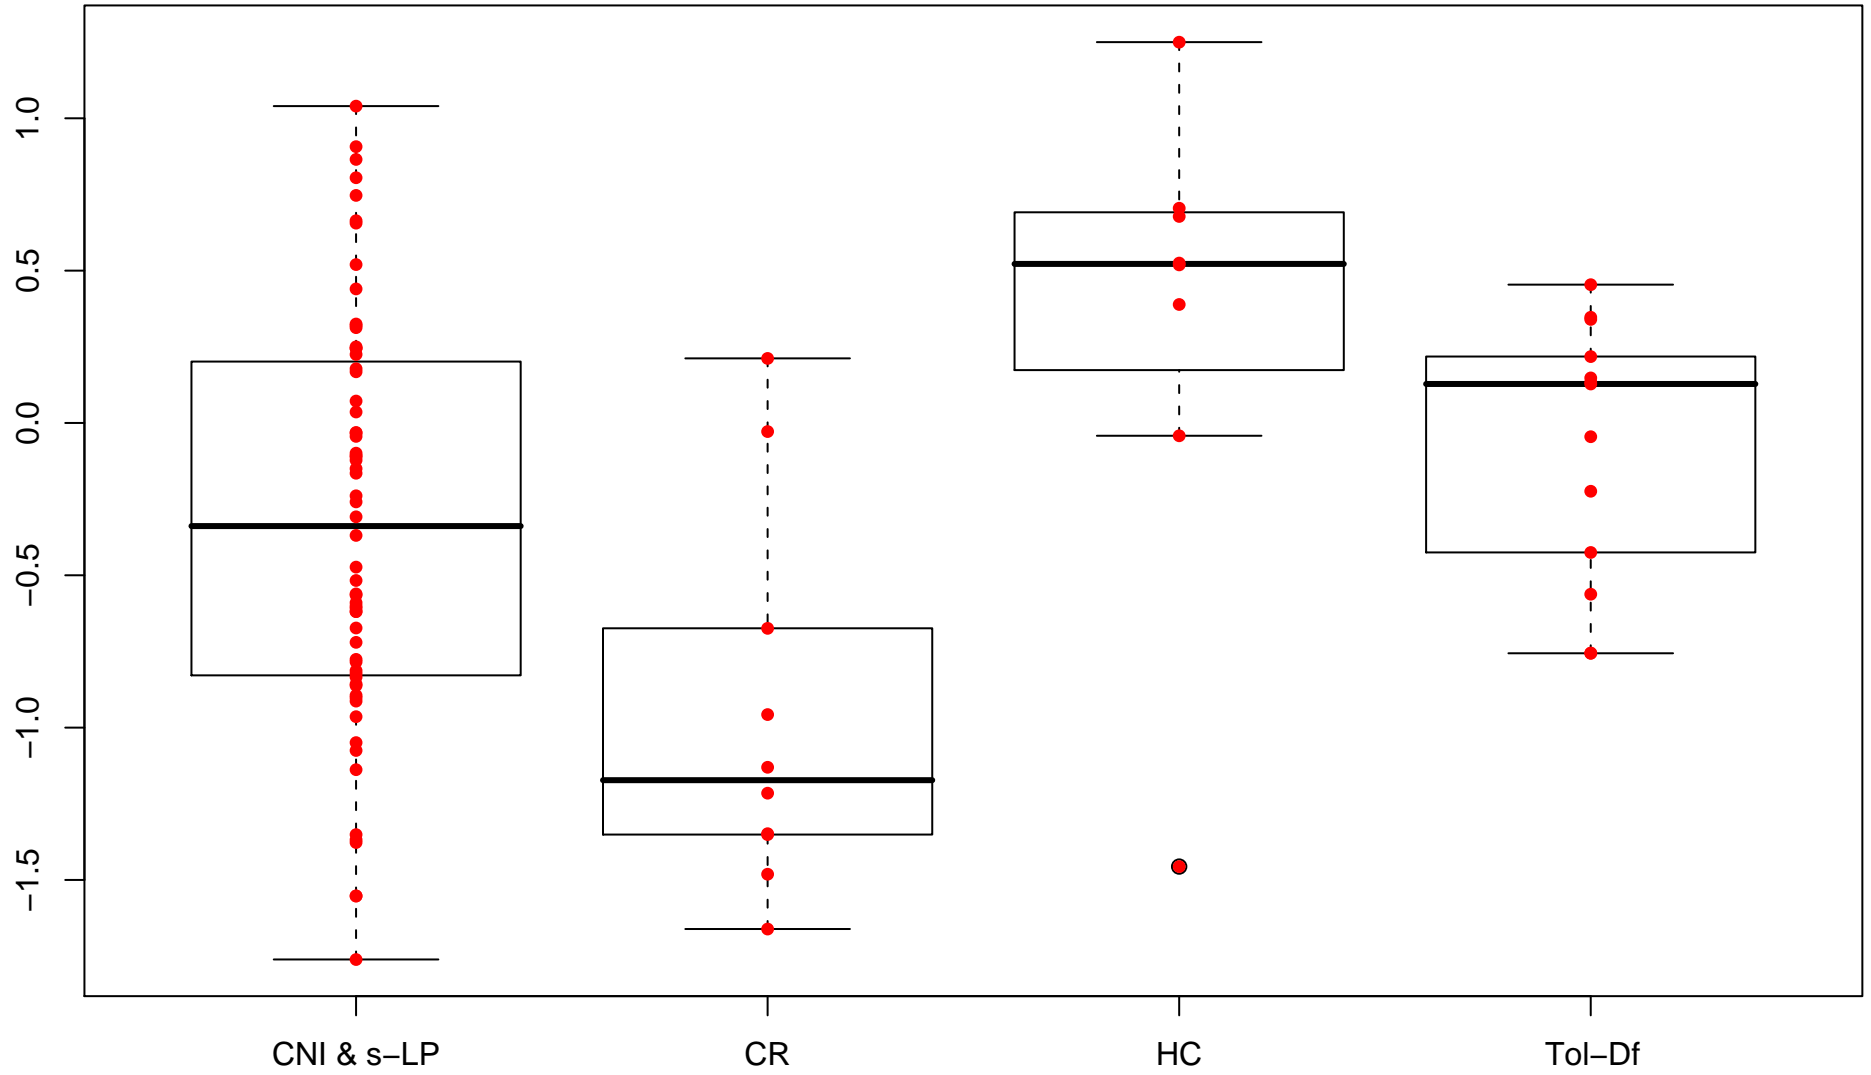



Rank 243 : MCL1  
0.0009576

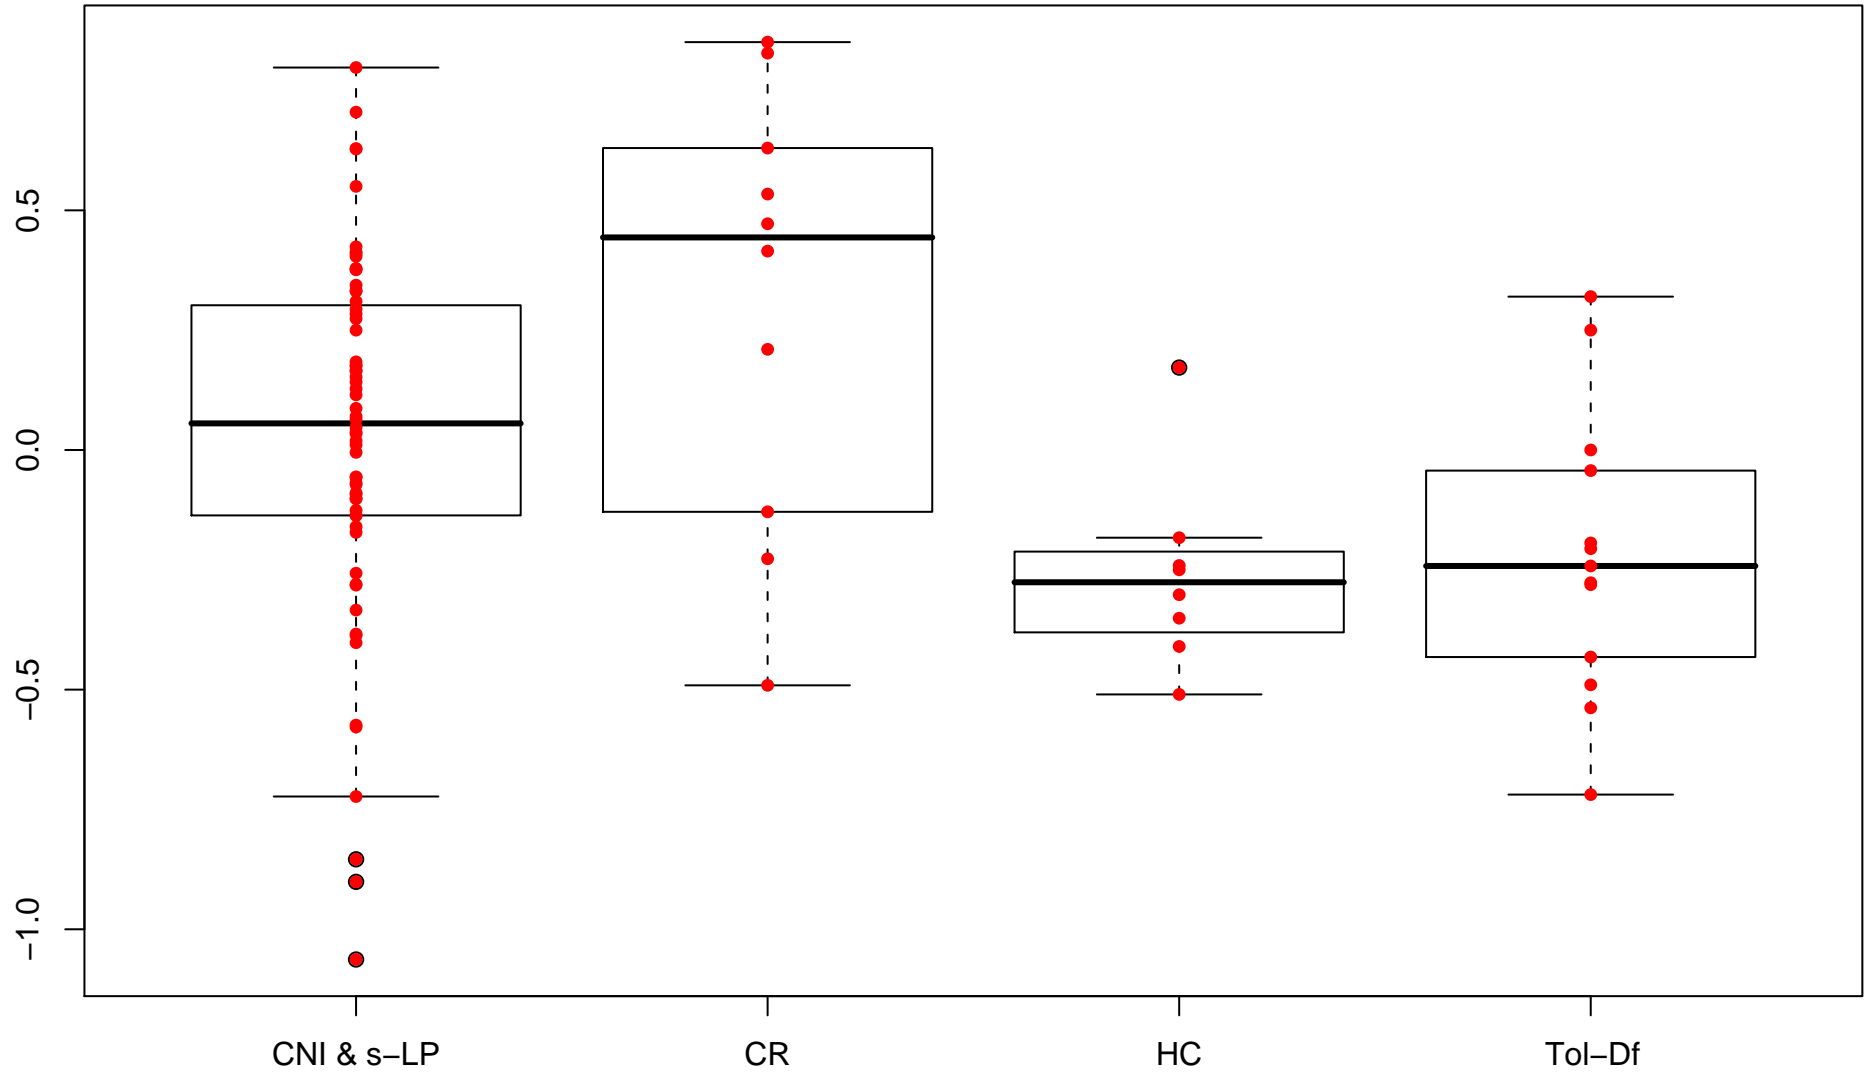

Rank 244 : SLC26A8  
0.0009576

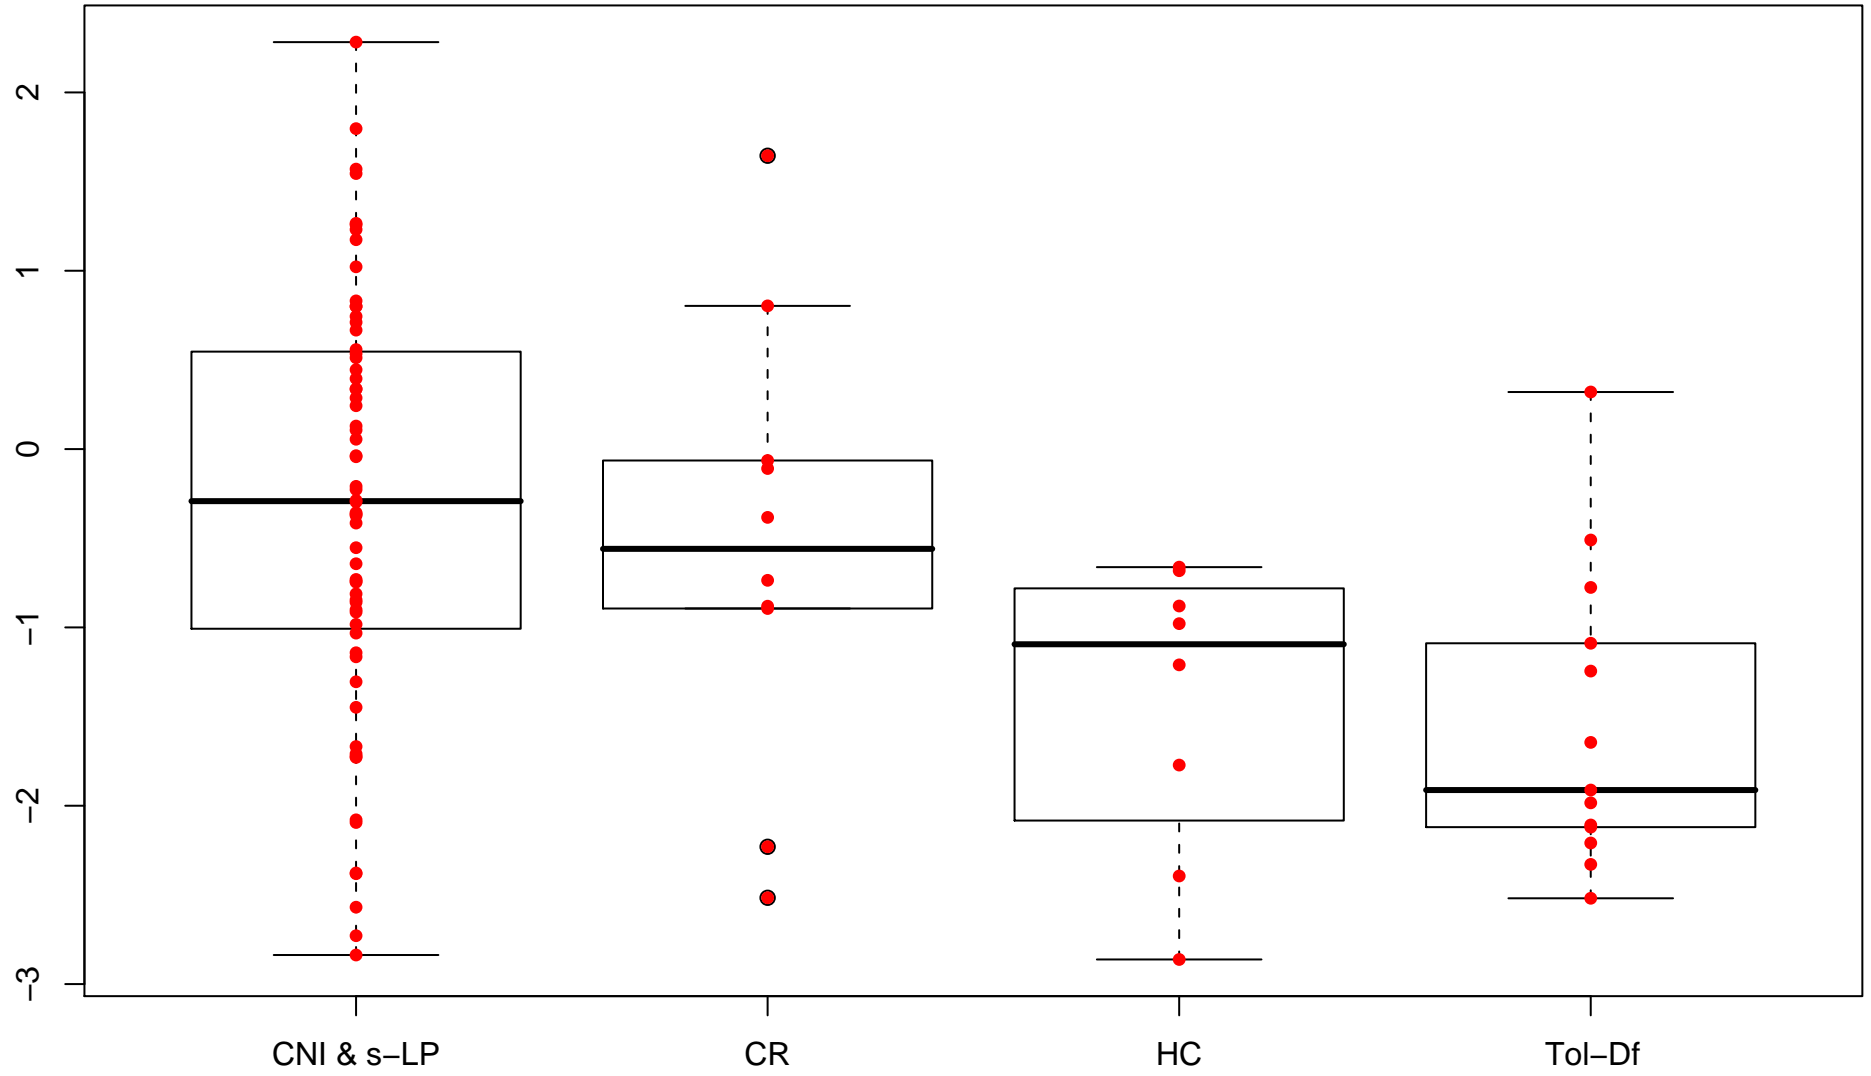

Rank 245 : PSMB3  
0.0009602

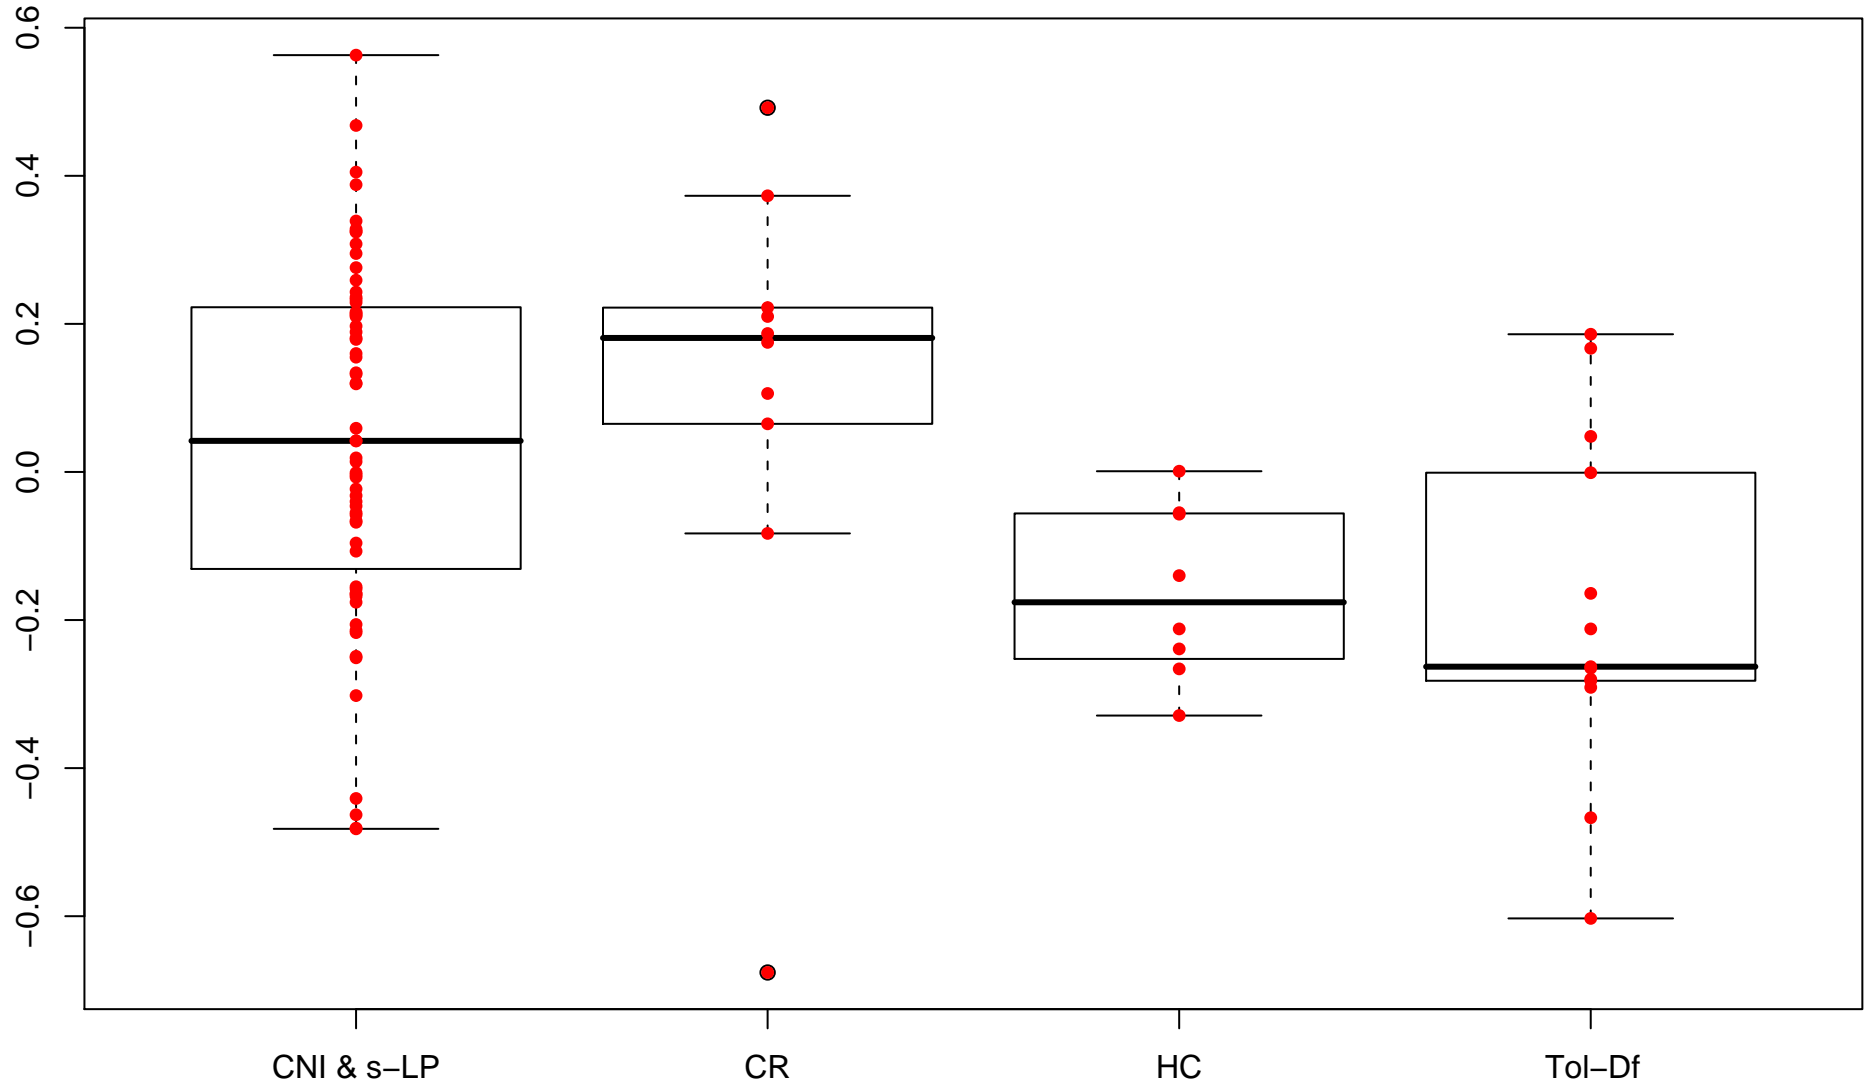

Rank 246 : CD247  
0.0009699

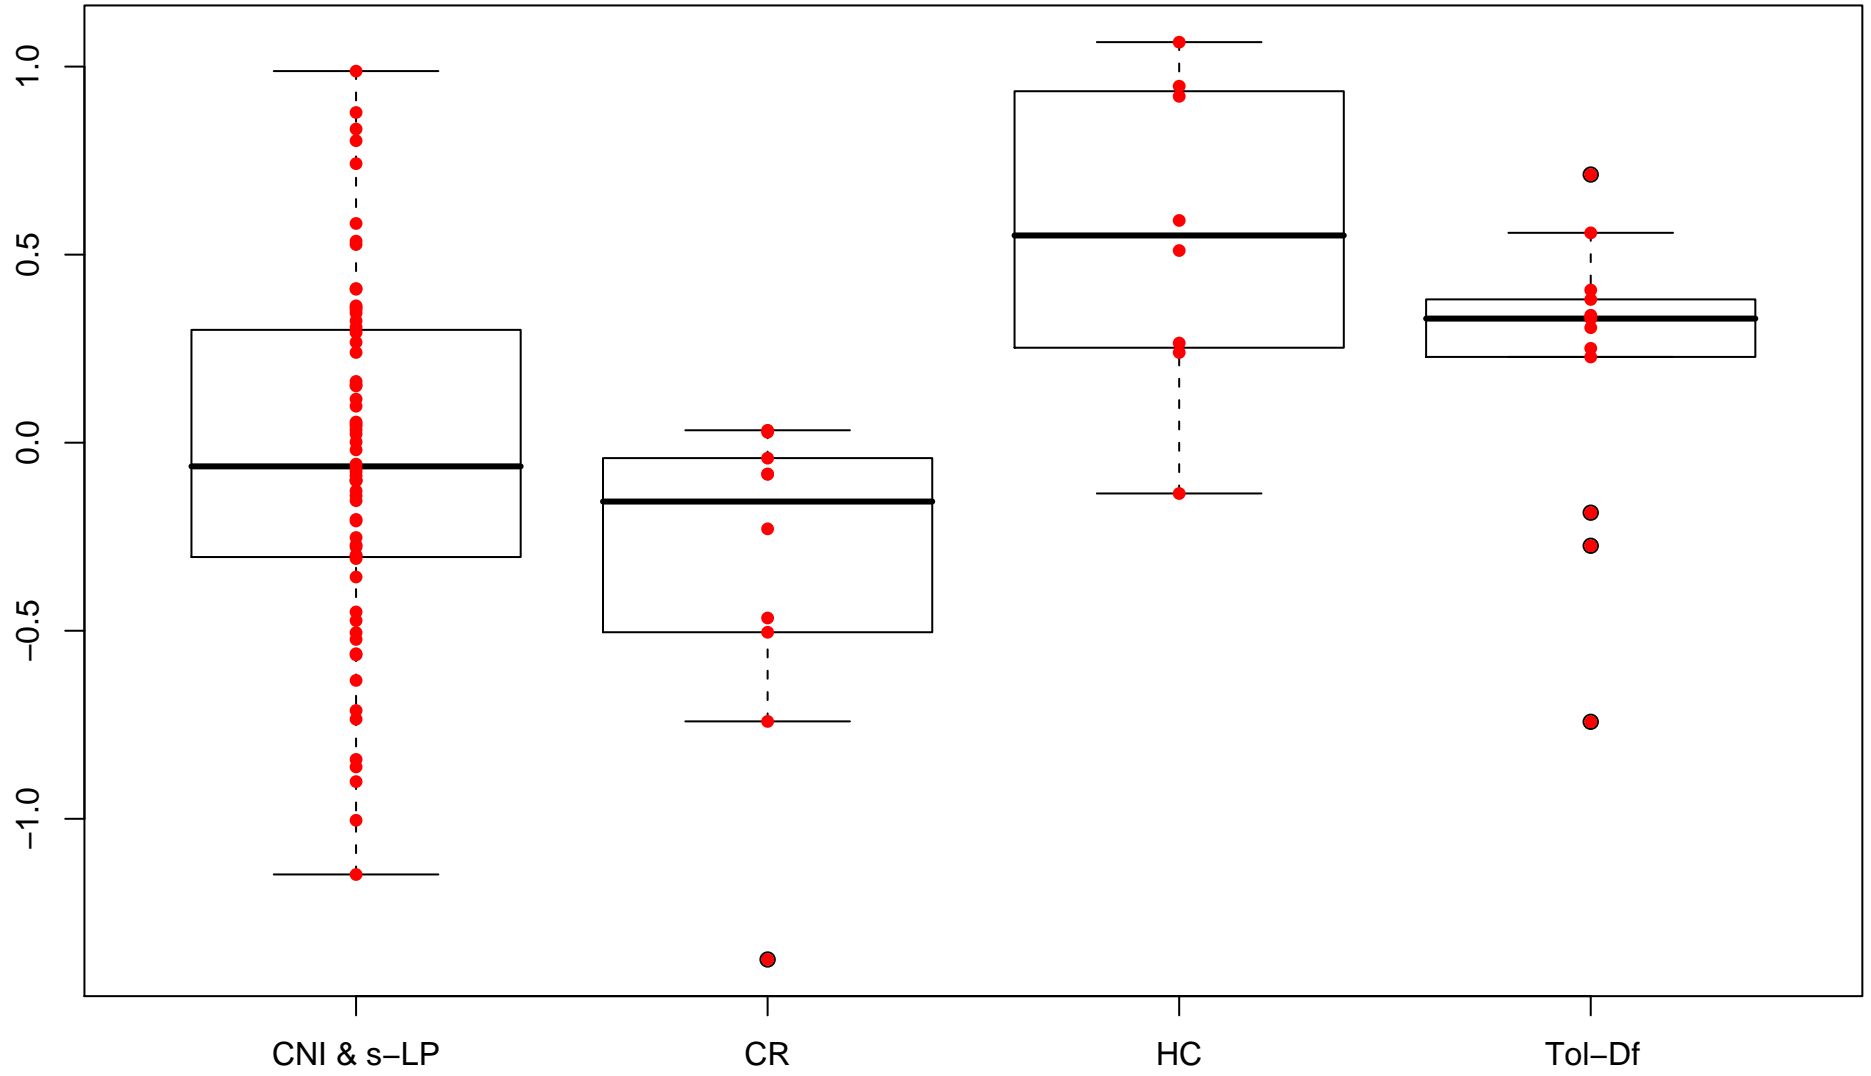

Rank 247 : UPF3A  
0.0009735

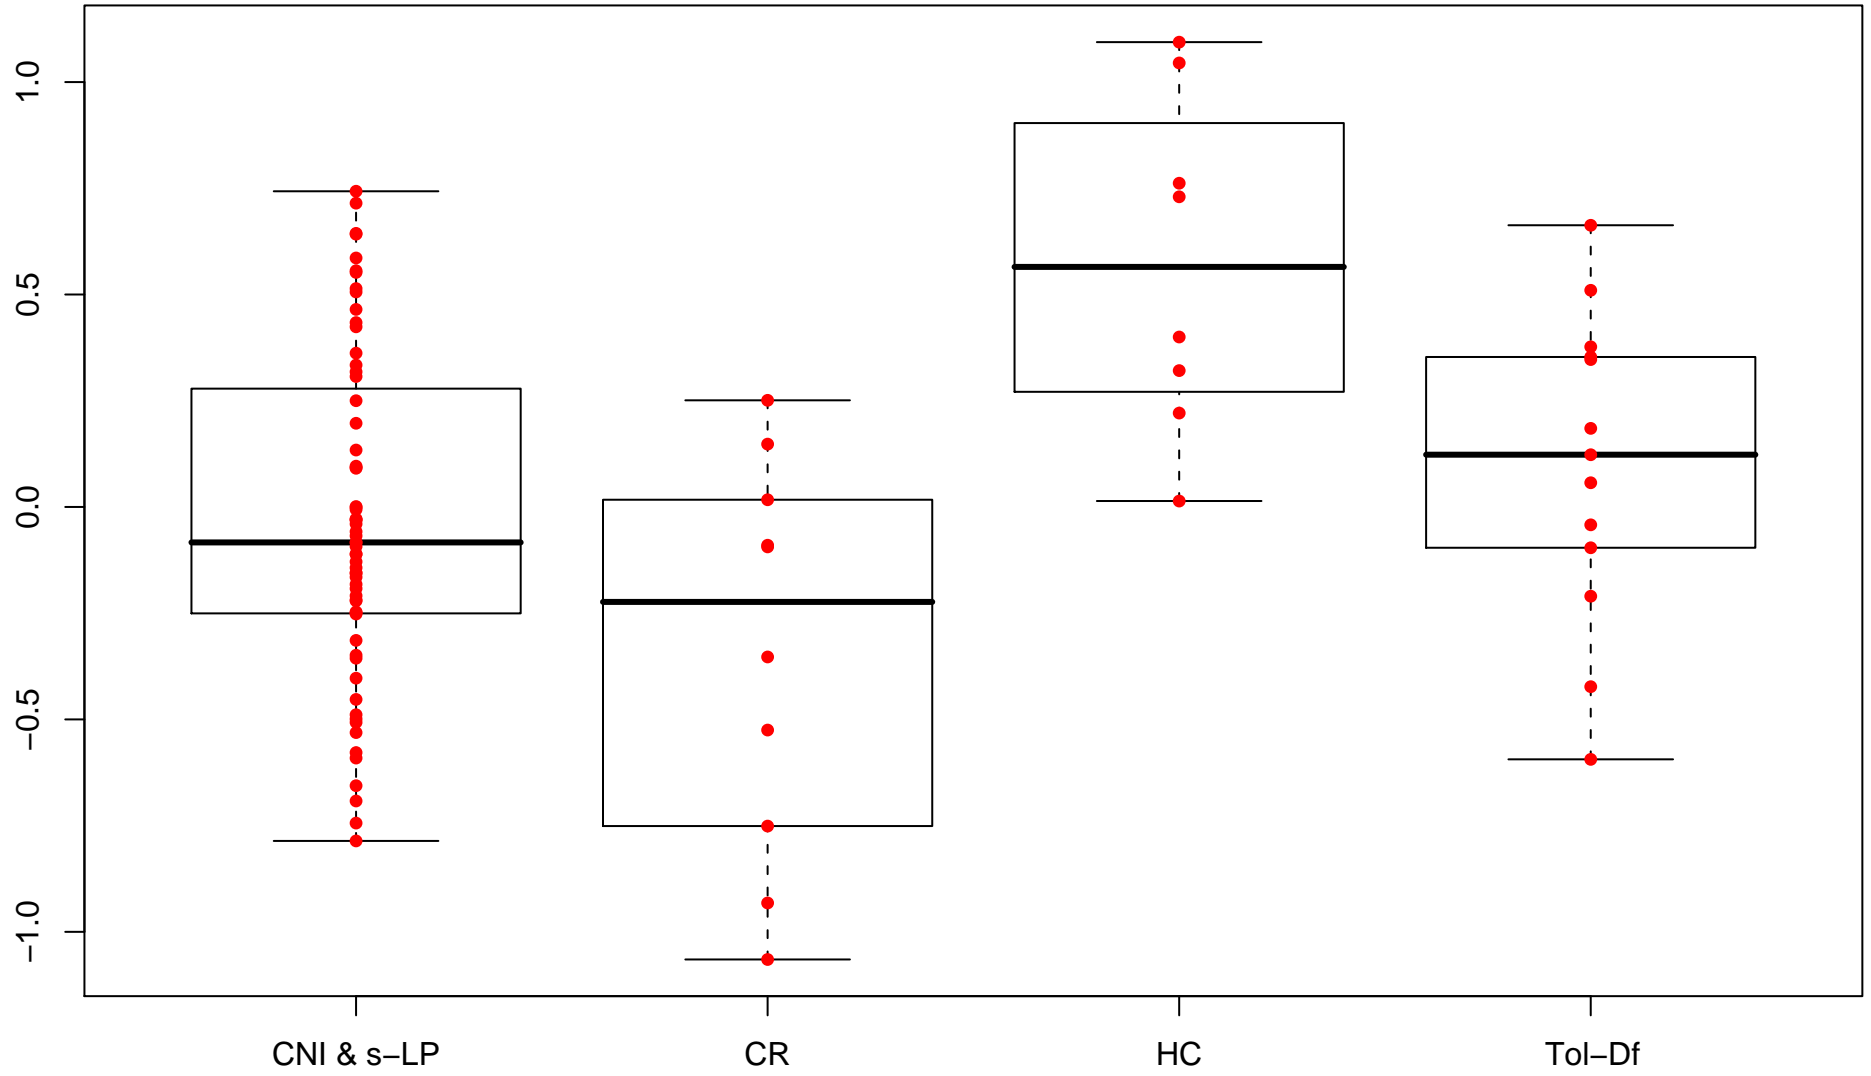

Rank 248 : RGS1  
0.0009772

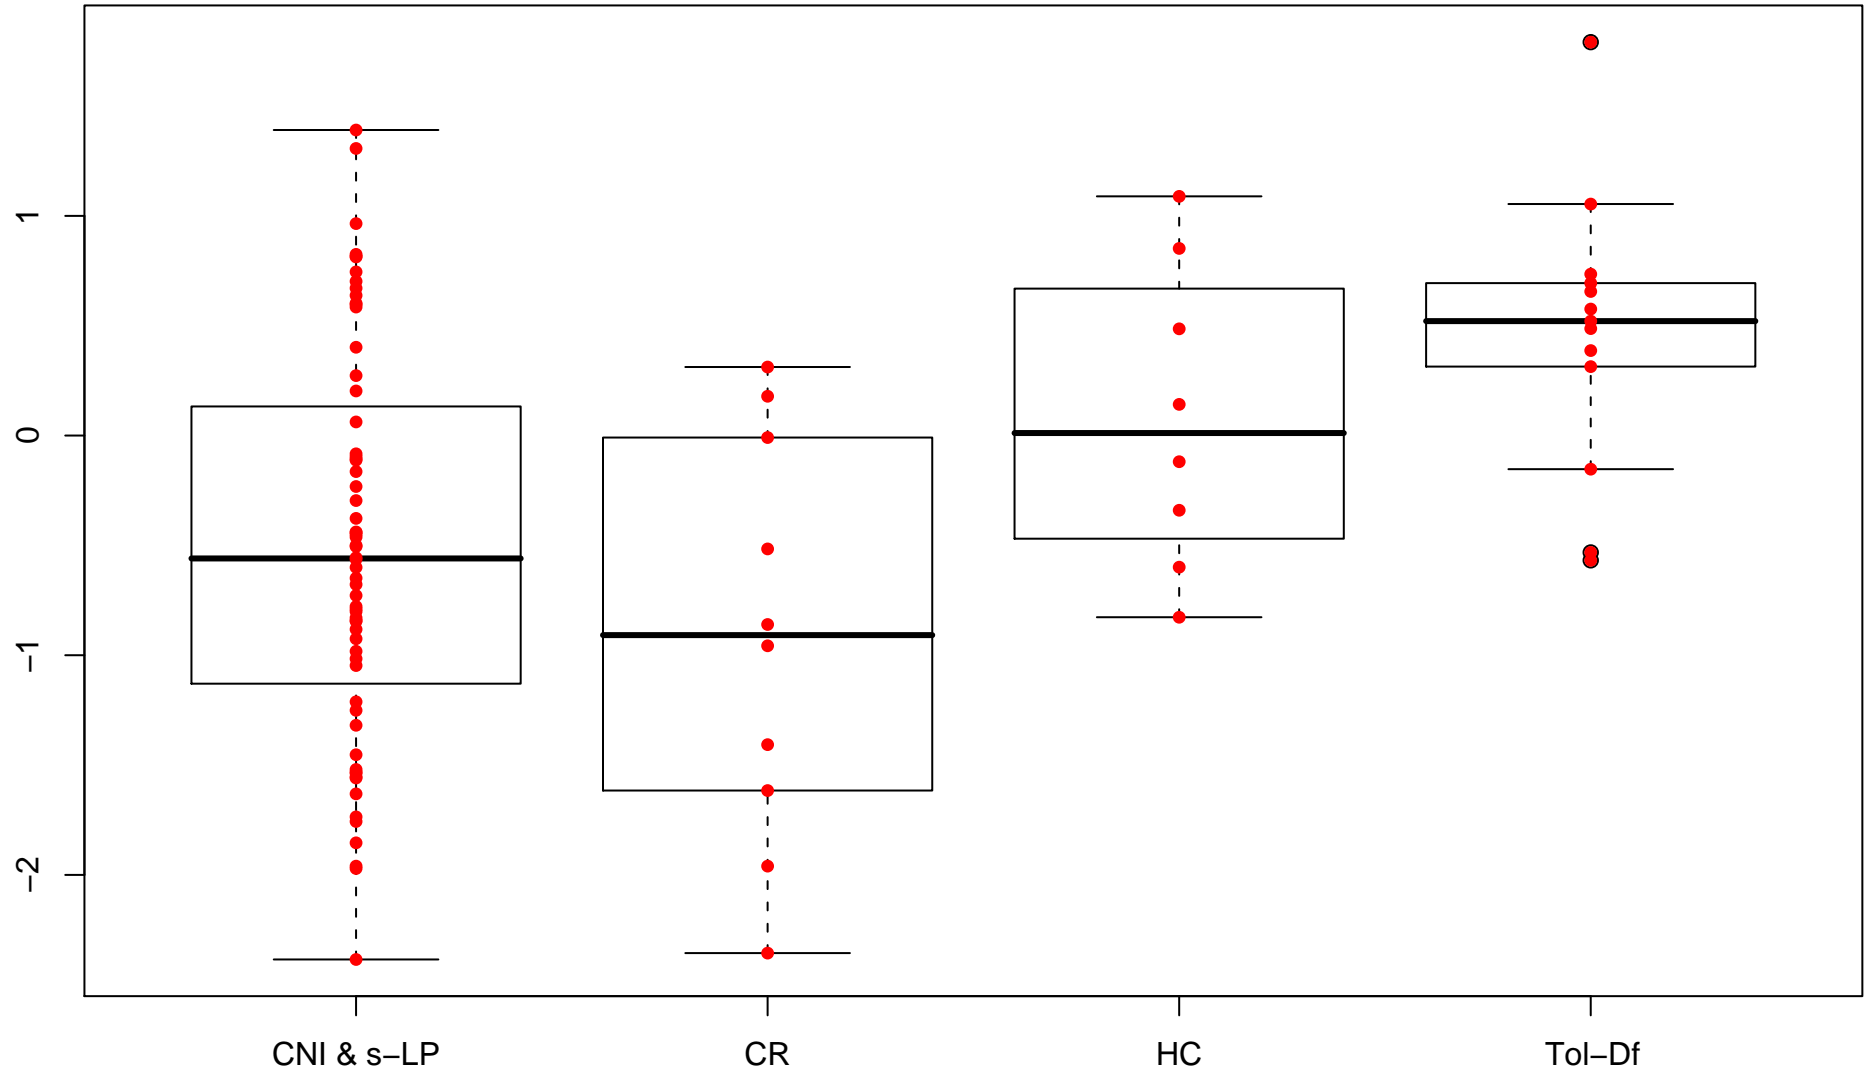

Rank 249 : RBM3  
0.000984

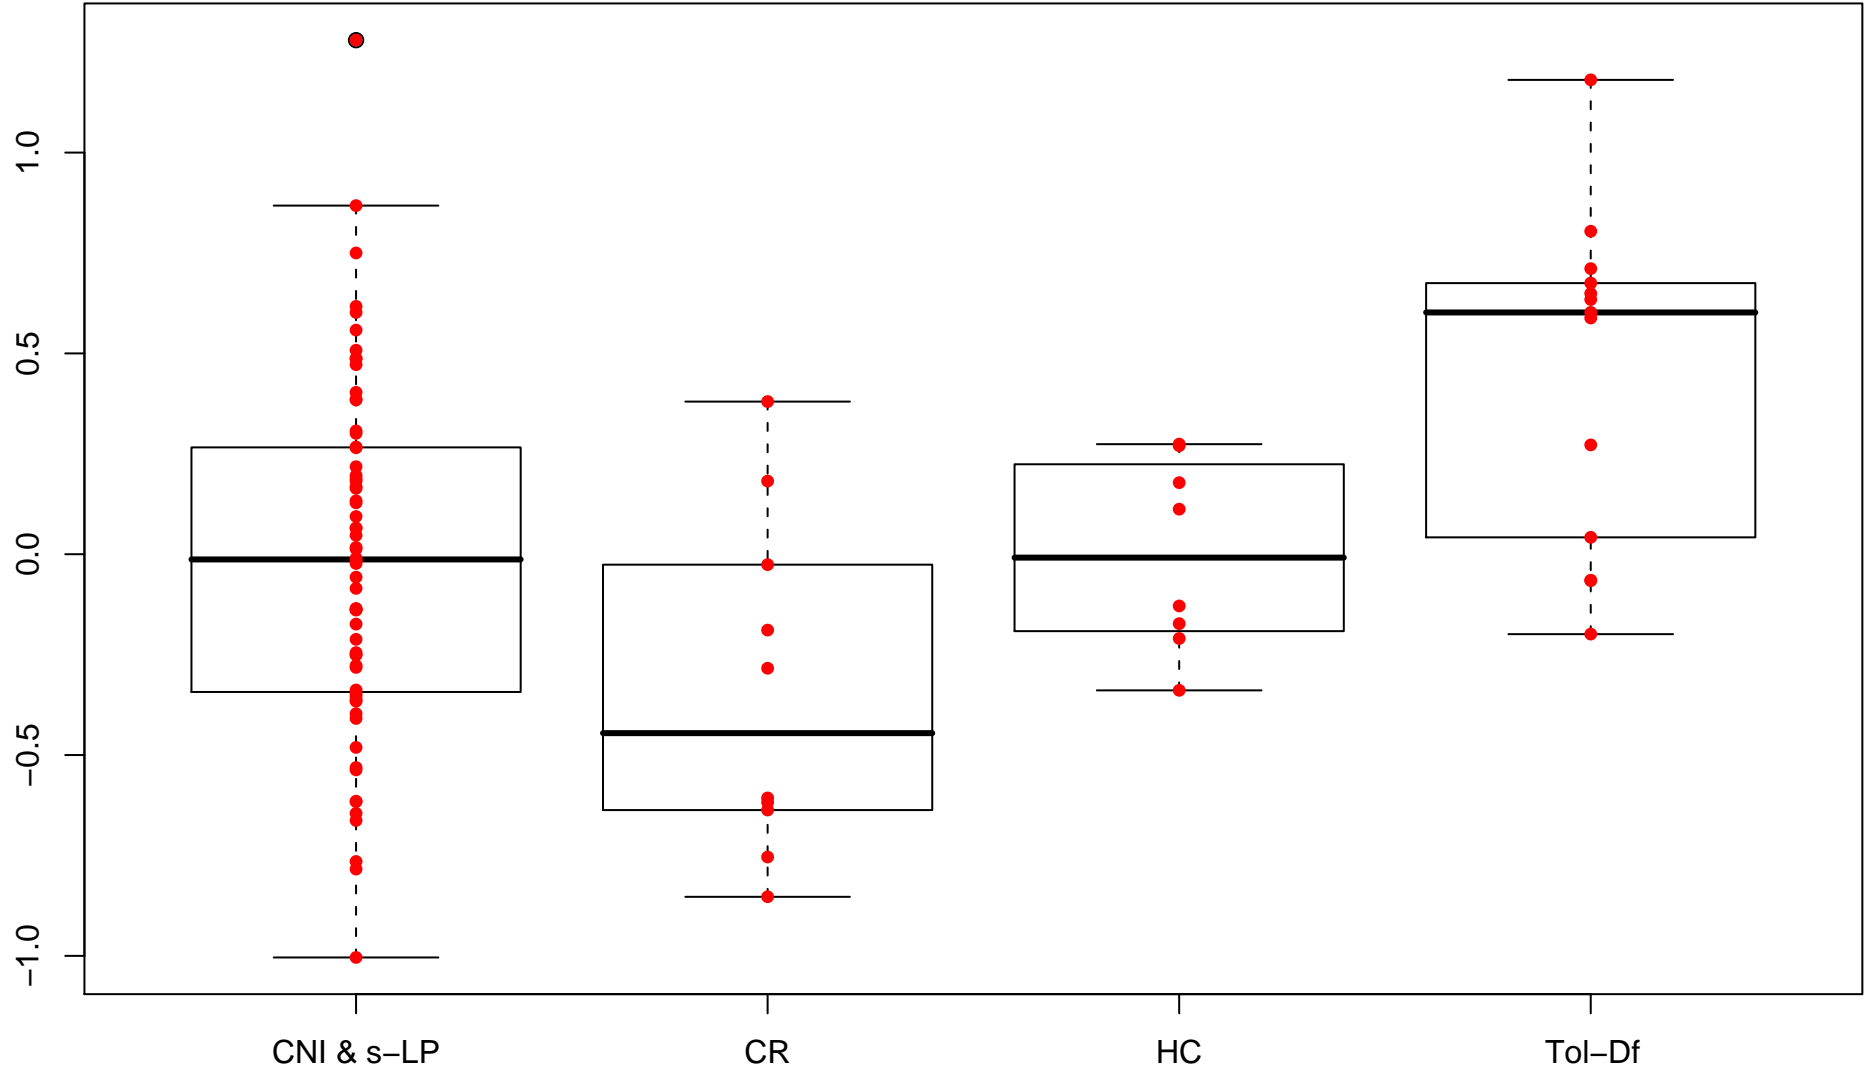

Rank 250 : POLR3H  
0.0010194

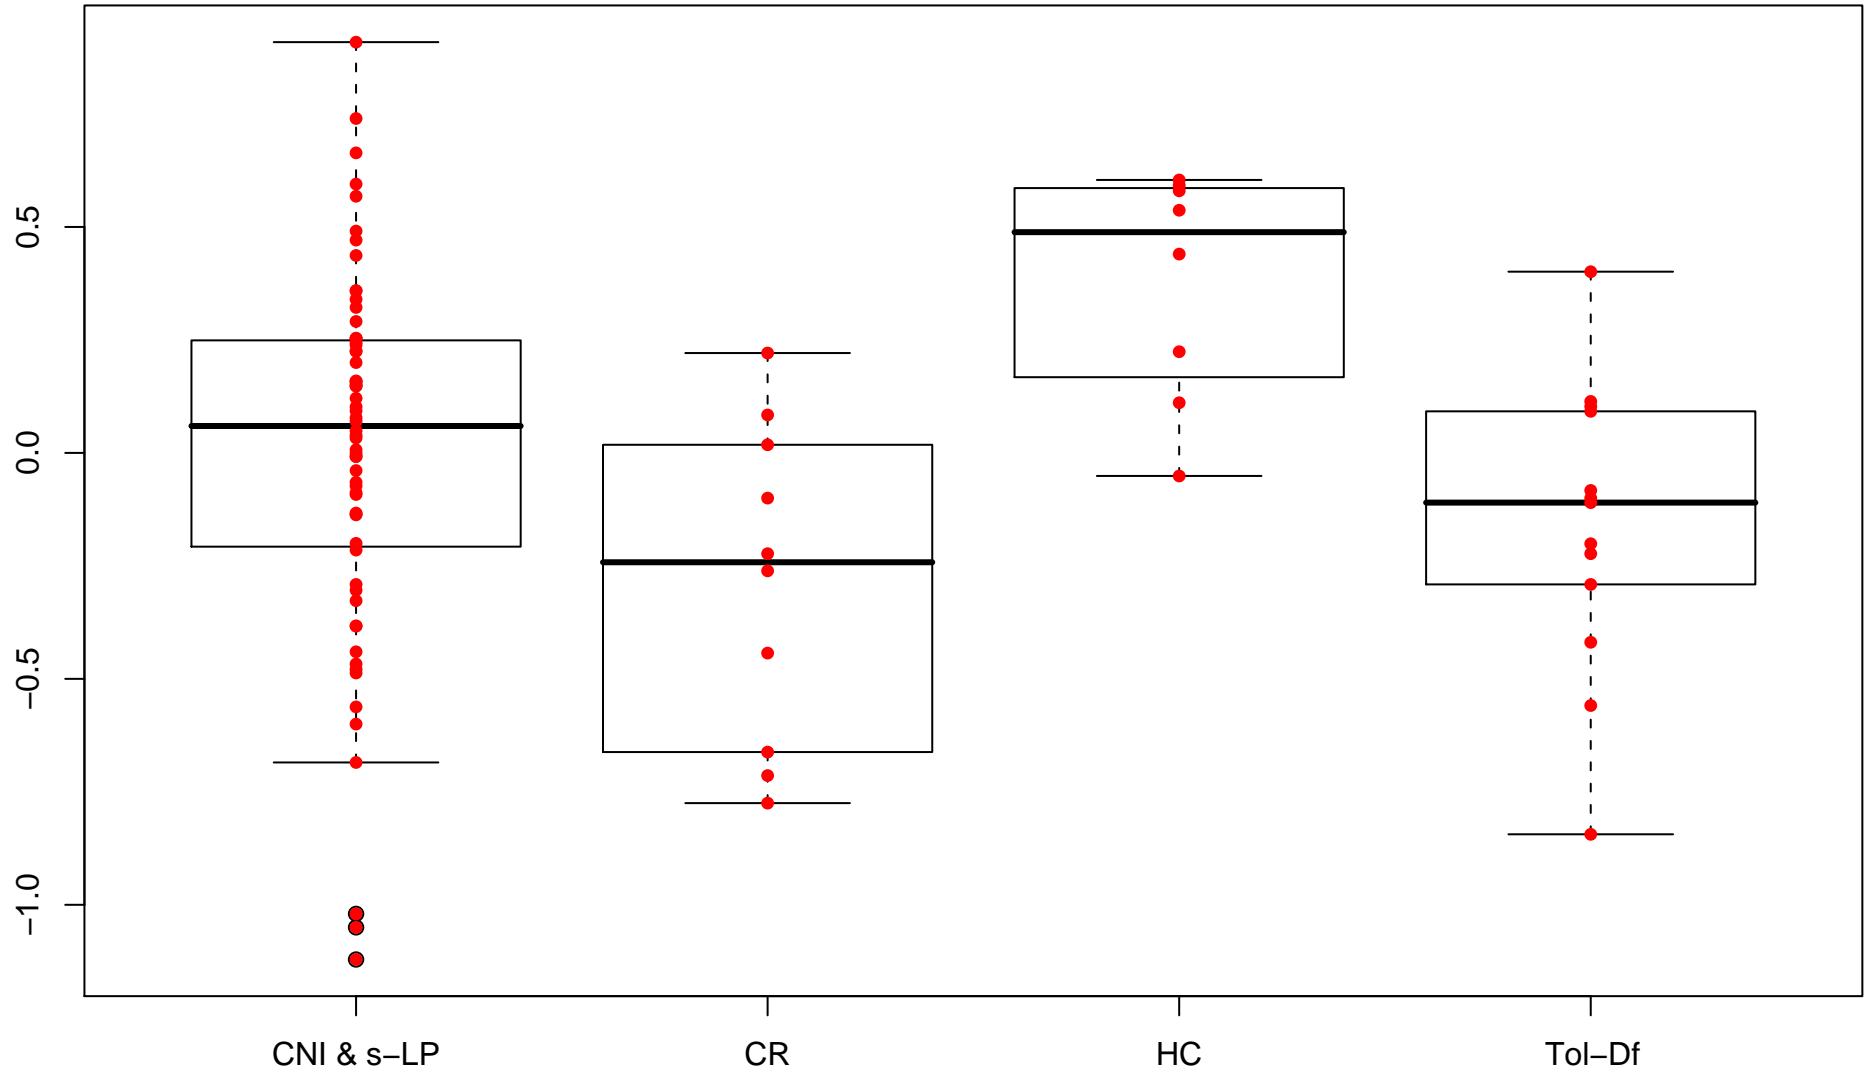



Figure 5B

Rank 1 : TCL1A  
4.678e-13

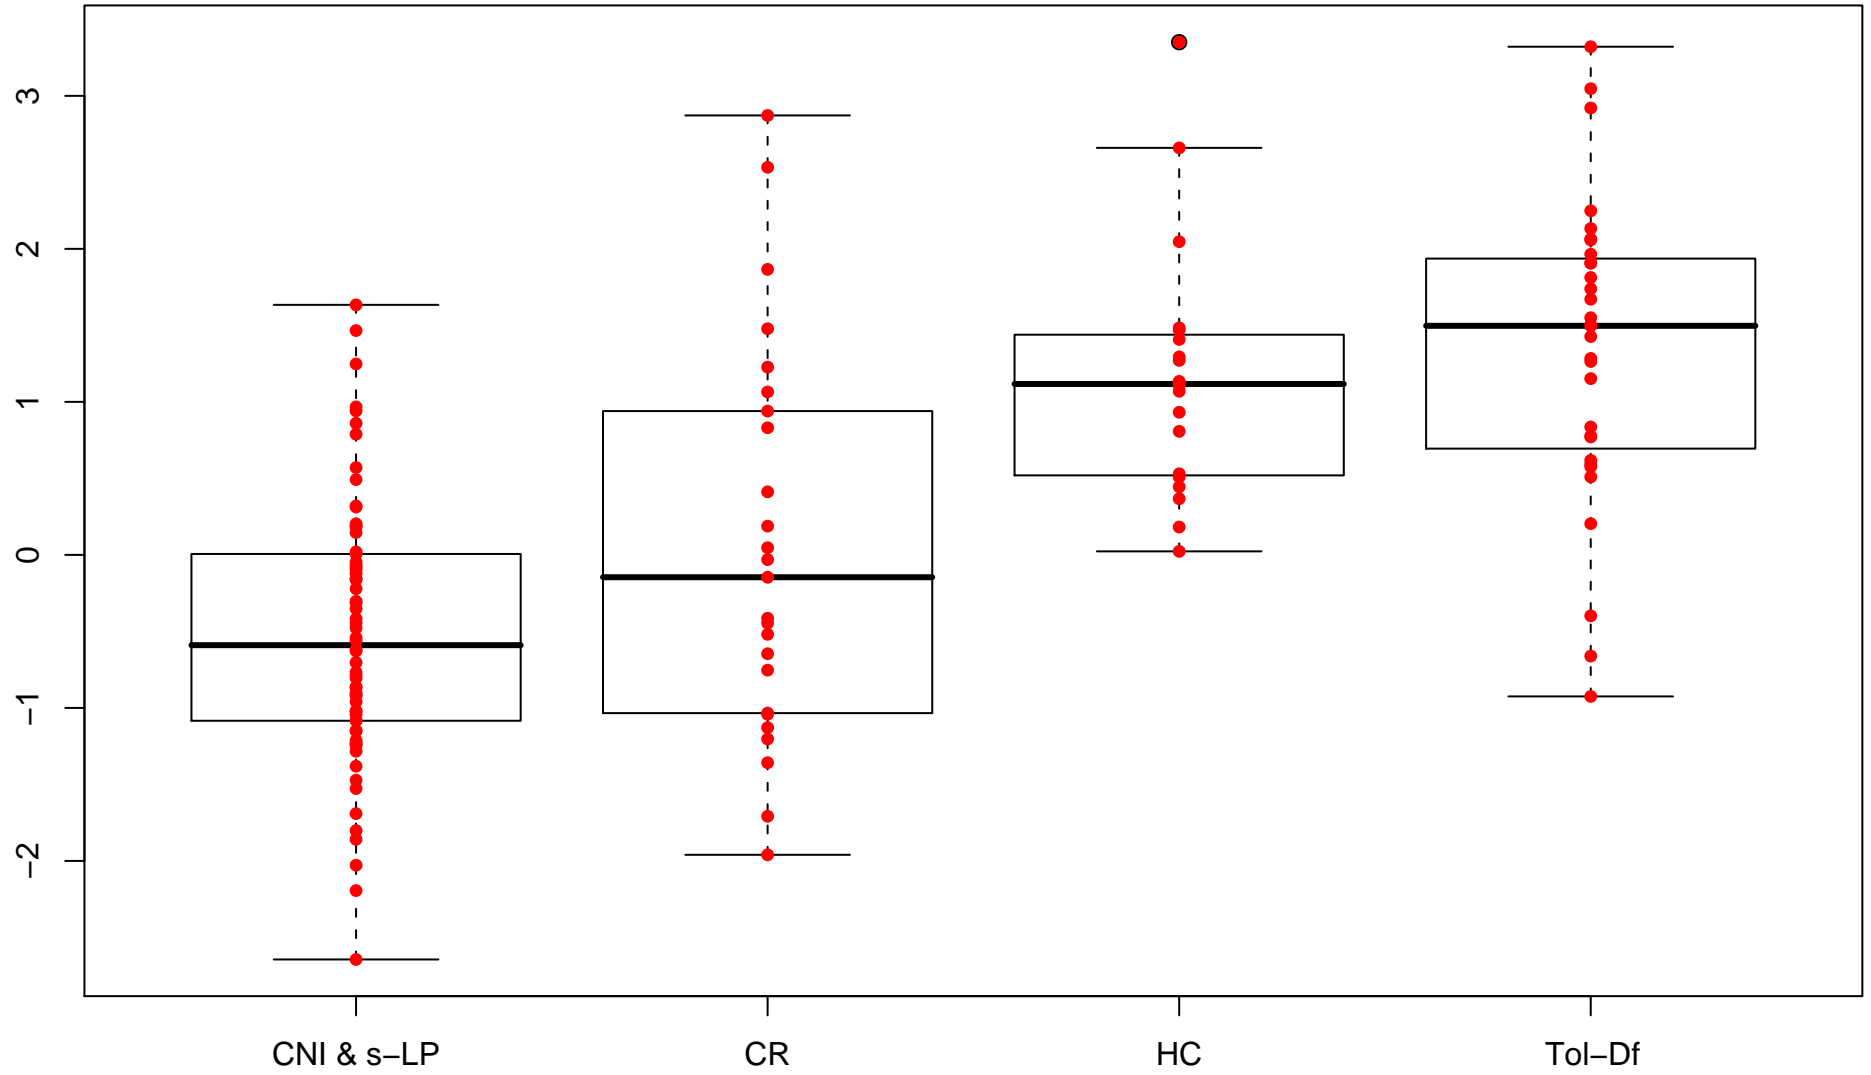

Rank 2 : TCL1A  
8.7e-13

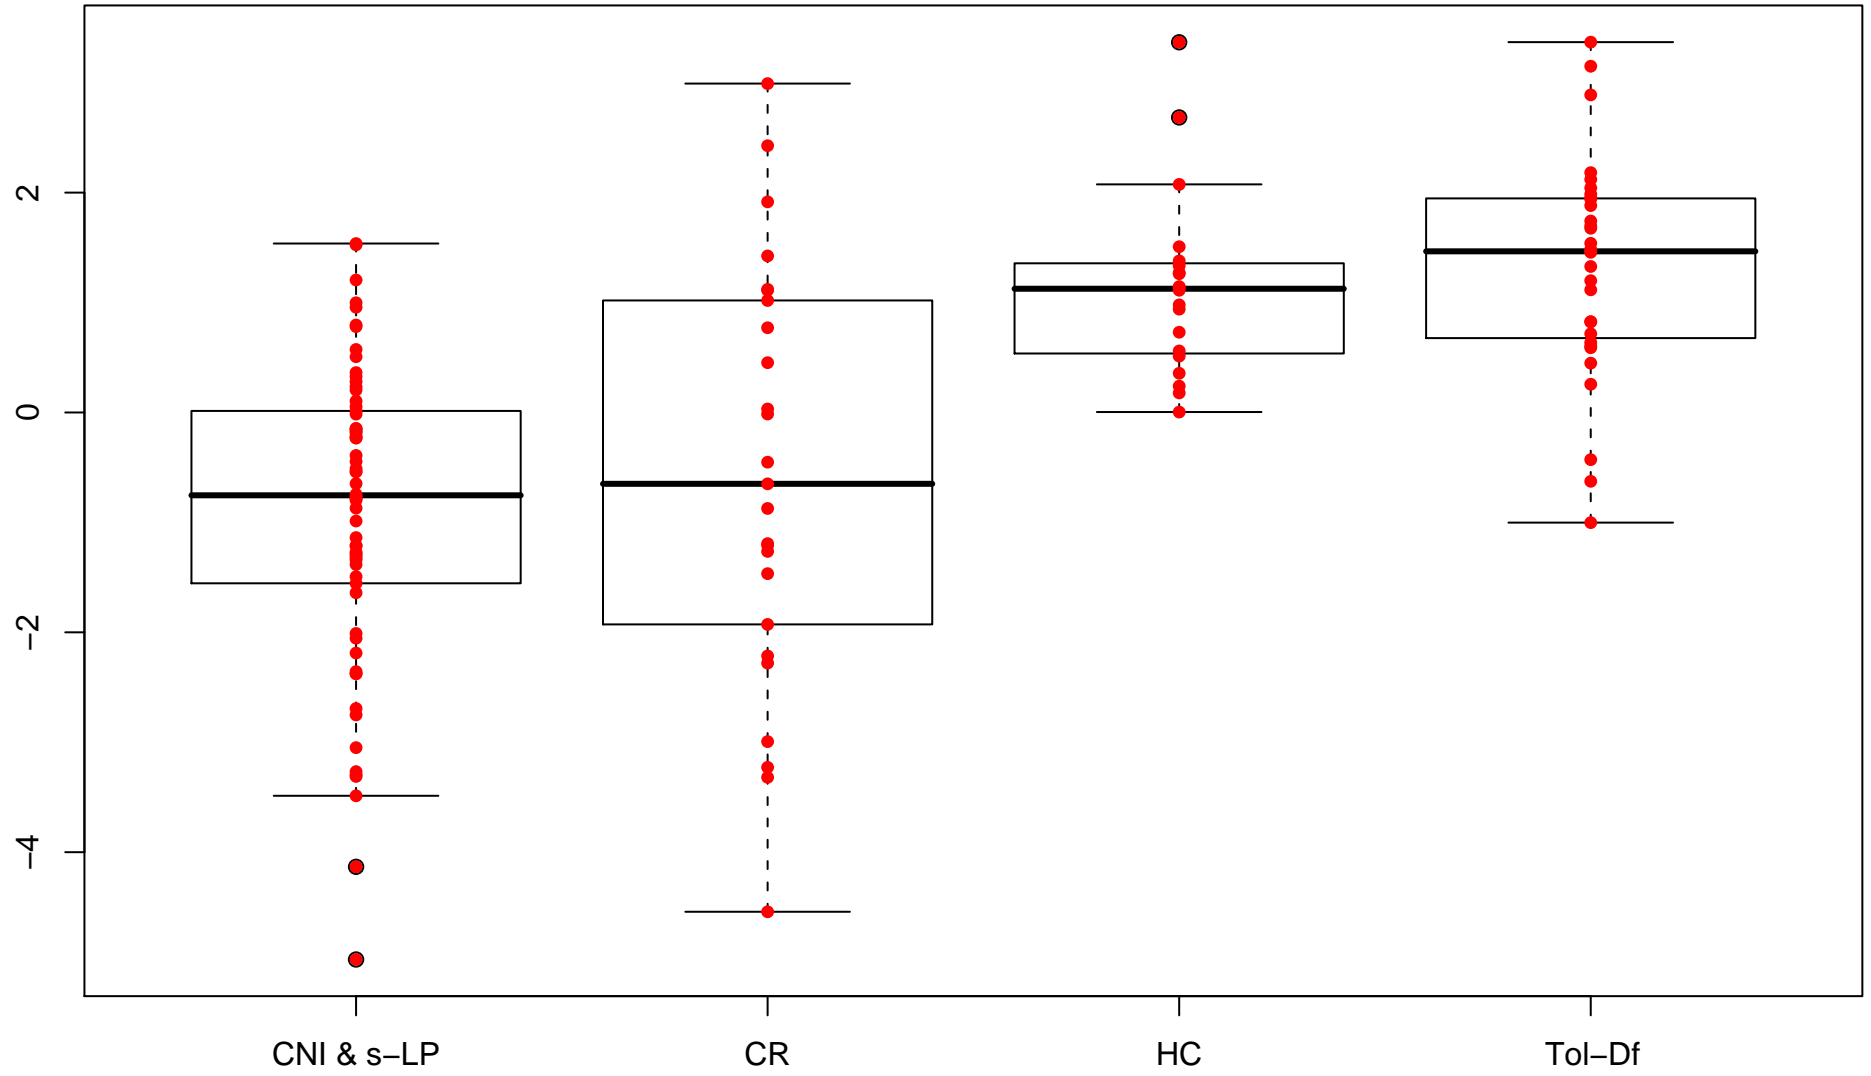

Rank 3 : HS3ST1  
3.0965e-12

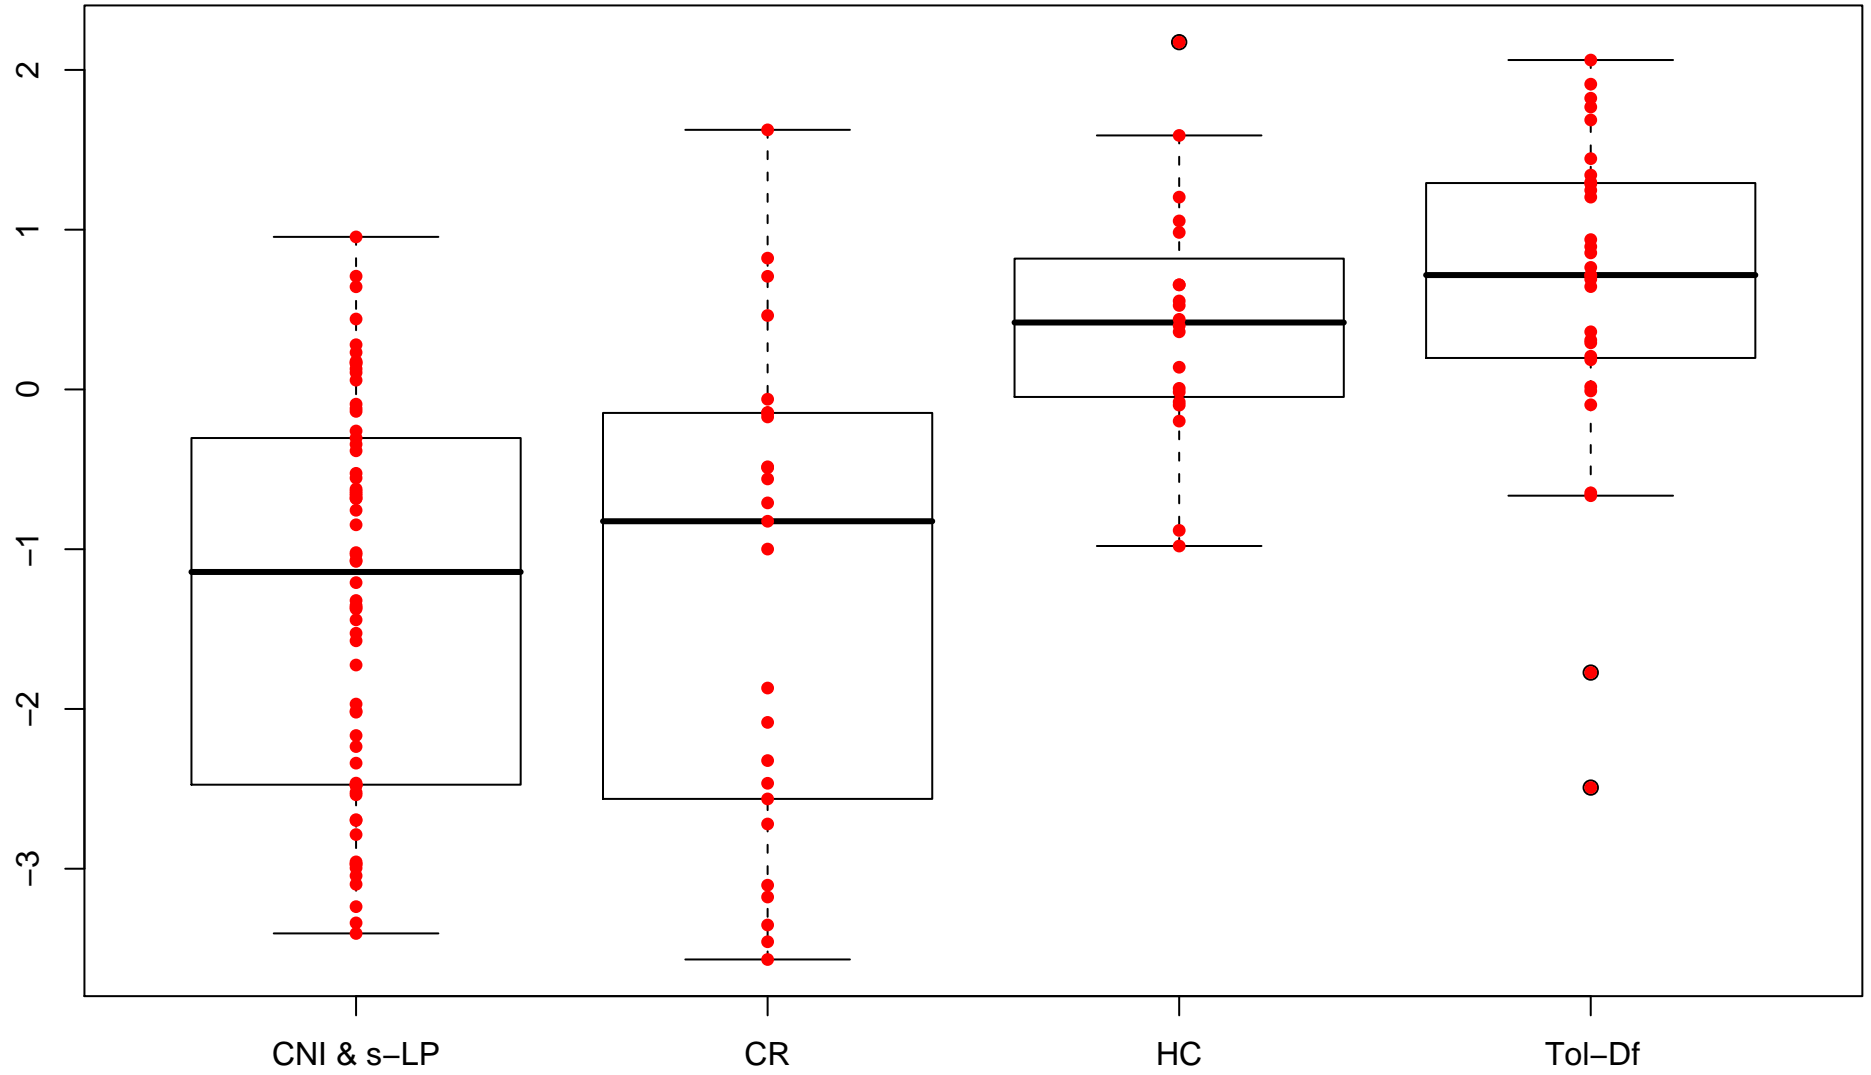

Rank 4 : CD200  
9.779e-12

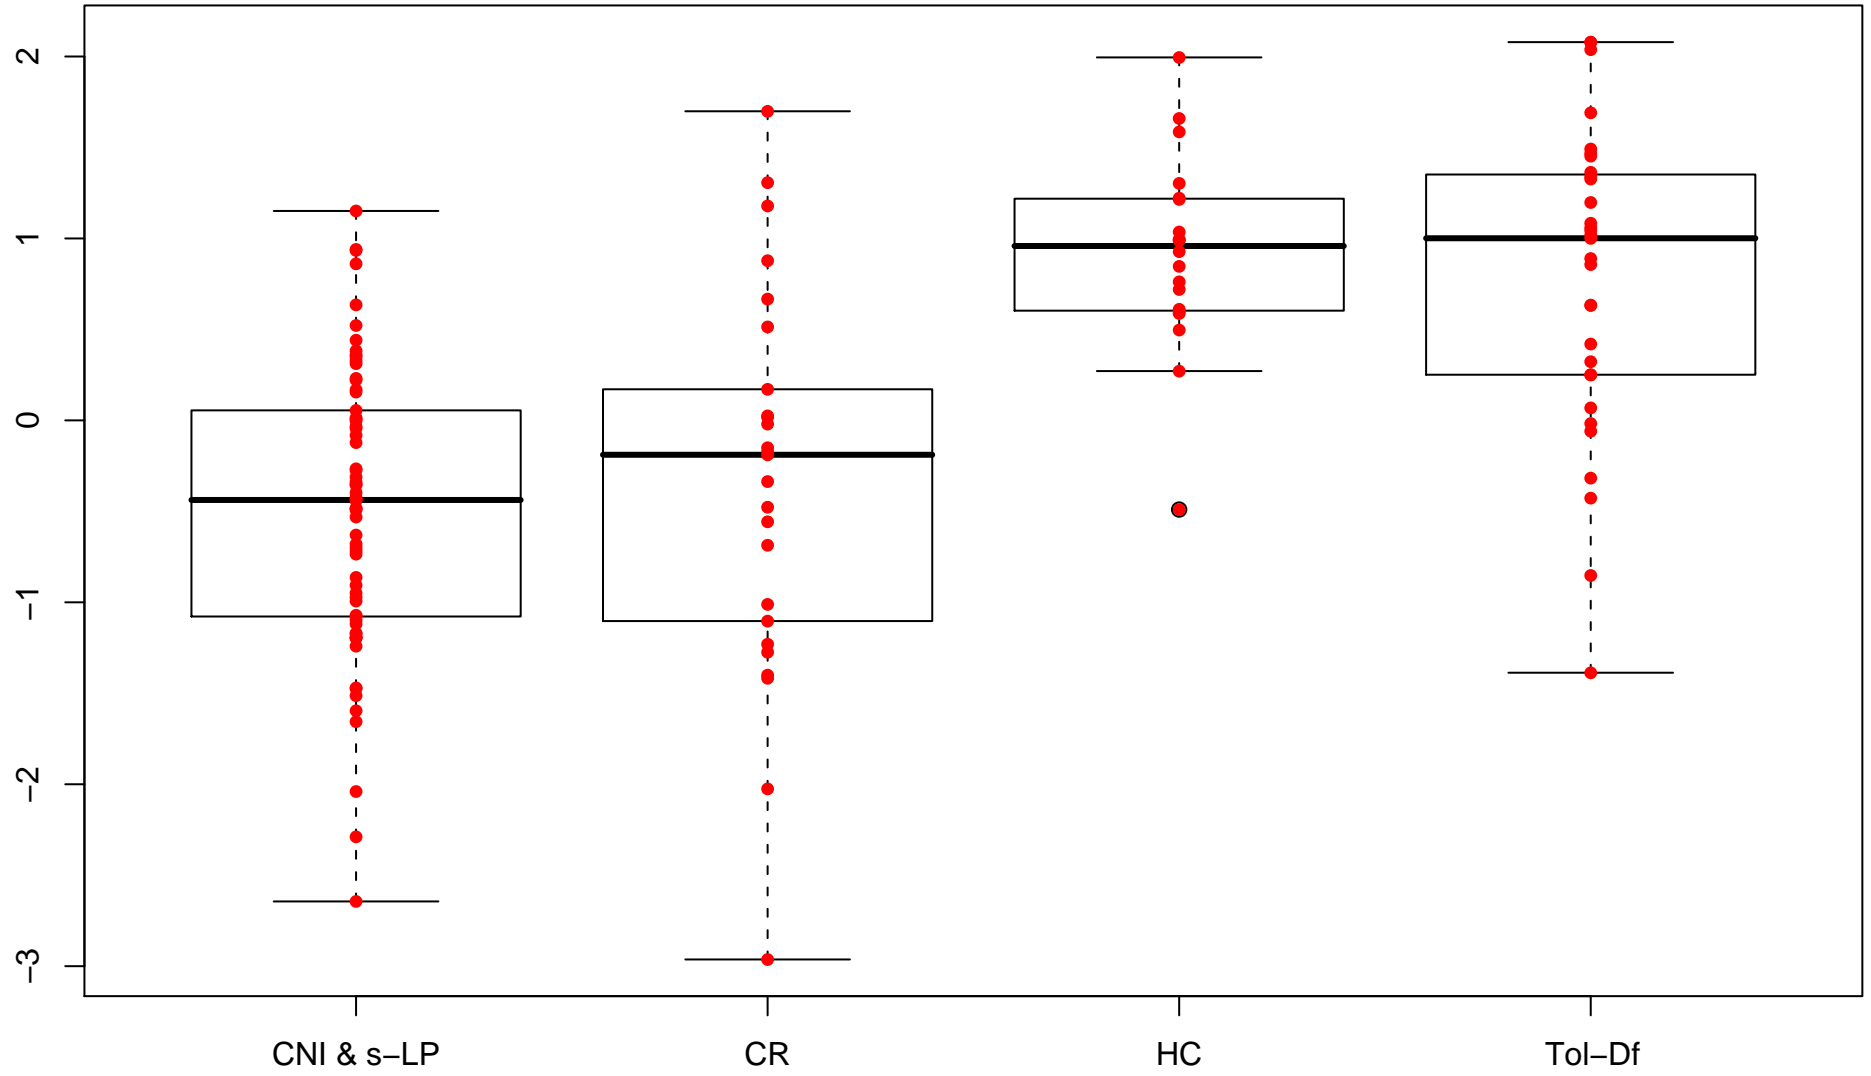

Rank 5 : ADAMTS4  
6.583e-11

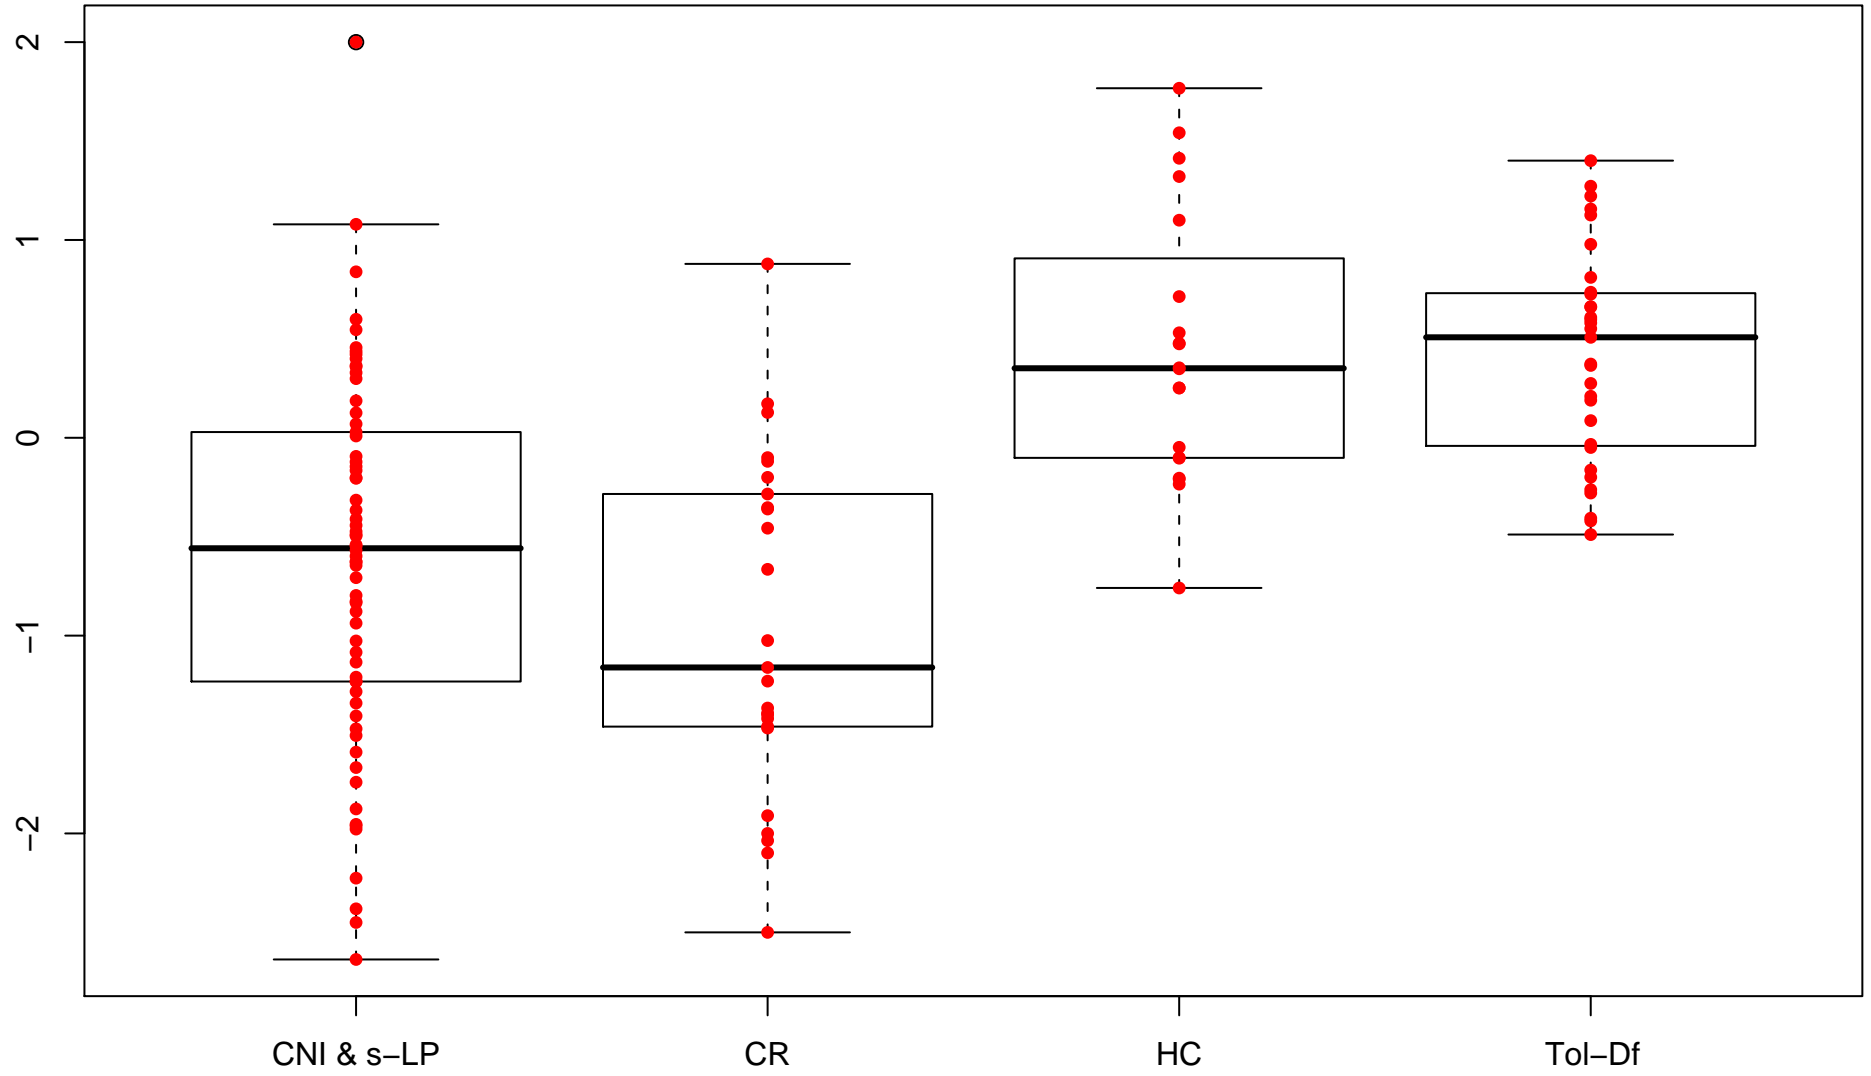

Rank 6 : CTLA4  
2.7675e-10

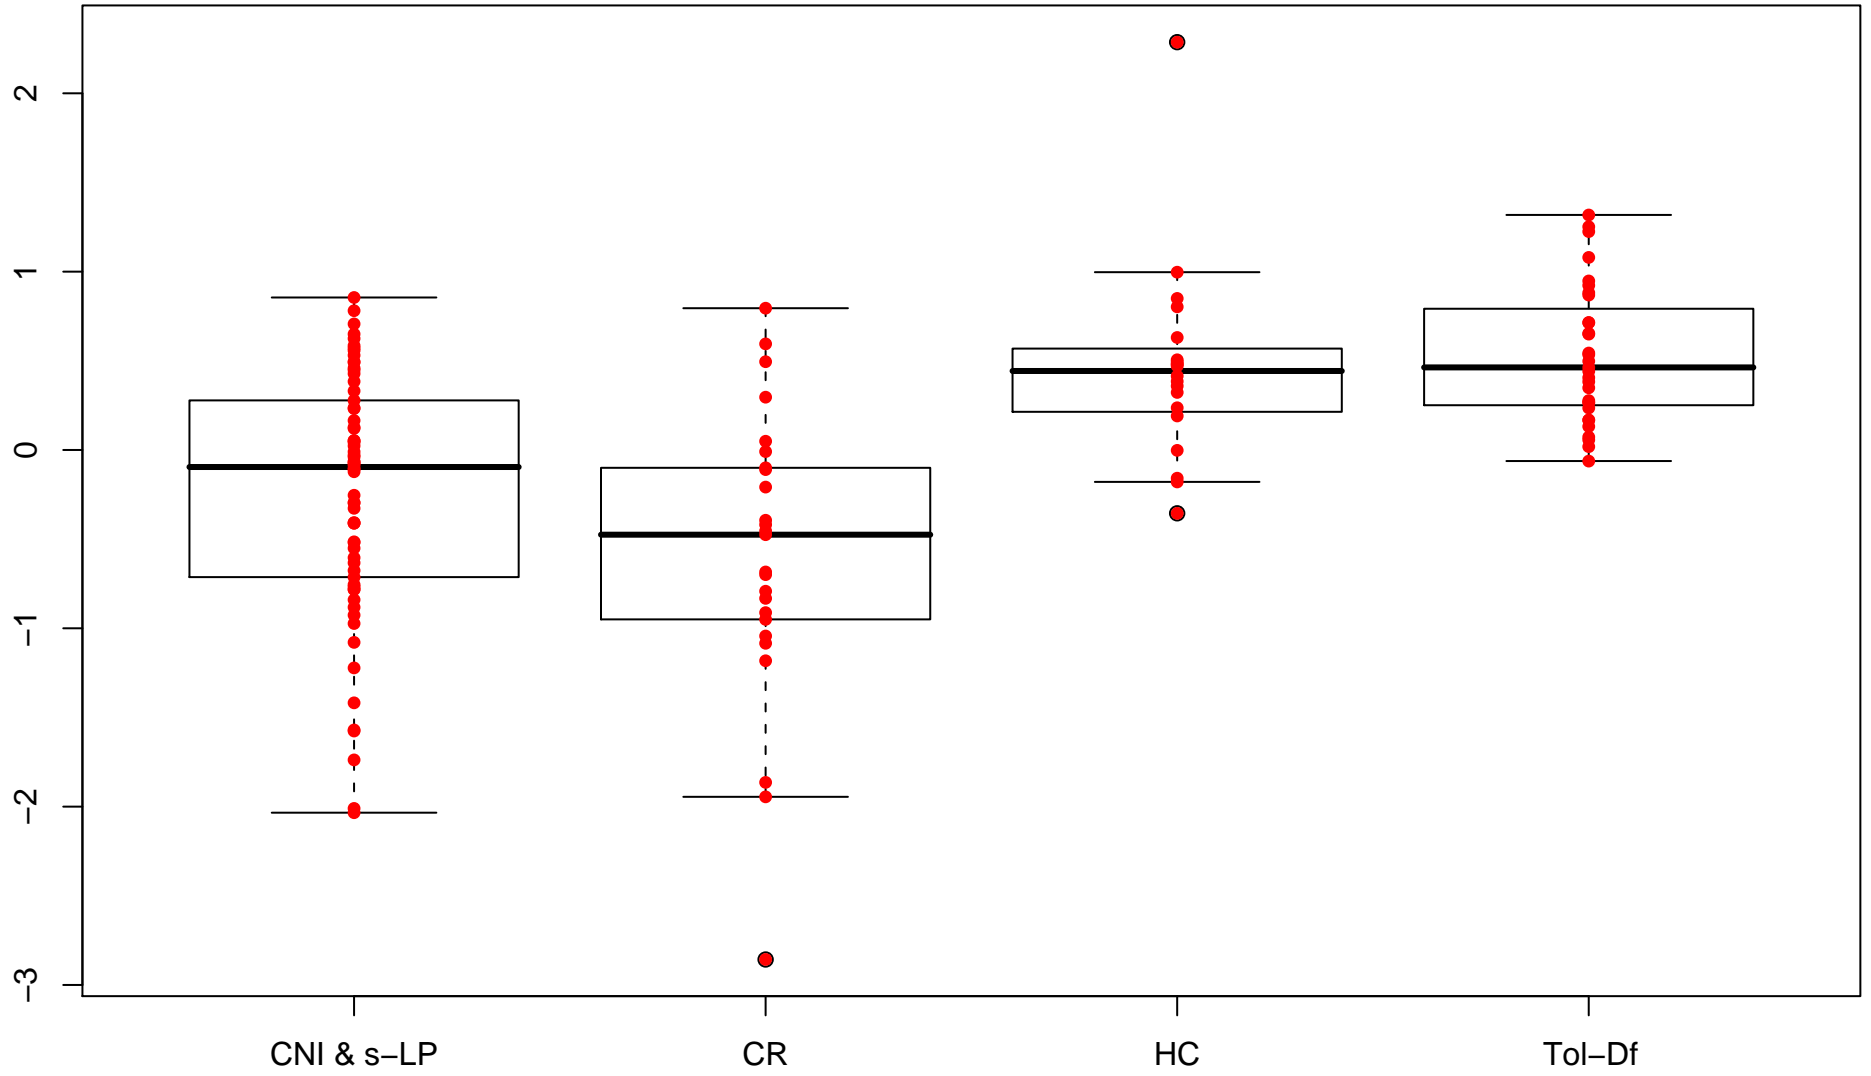

Rank 7 : GPR44  
4.024e-10

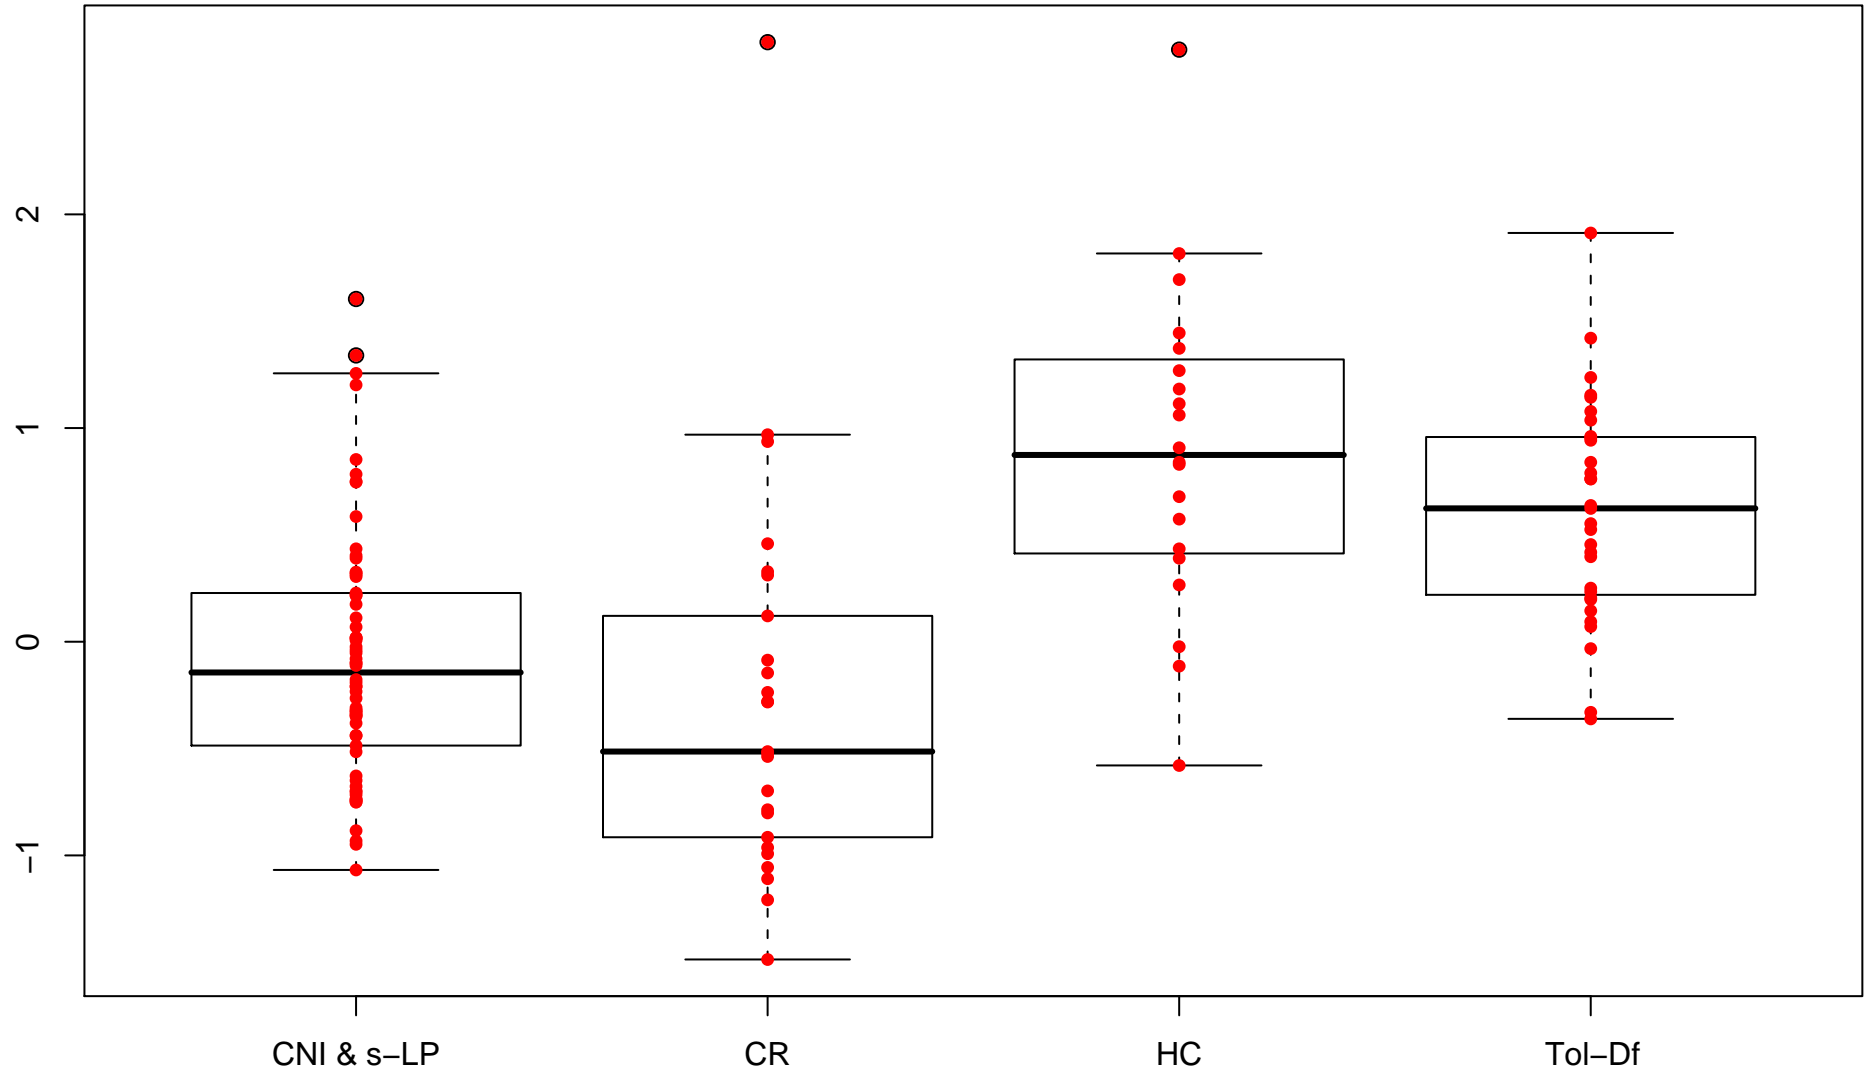



Rank 8 : TBC1D4  
7.215e-10

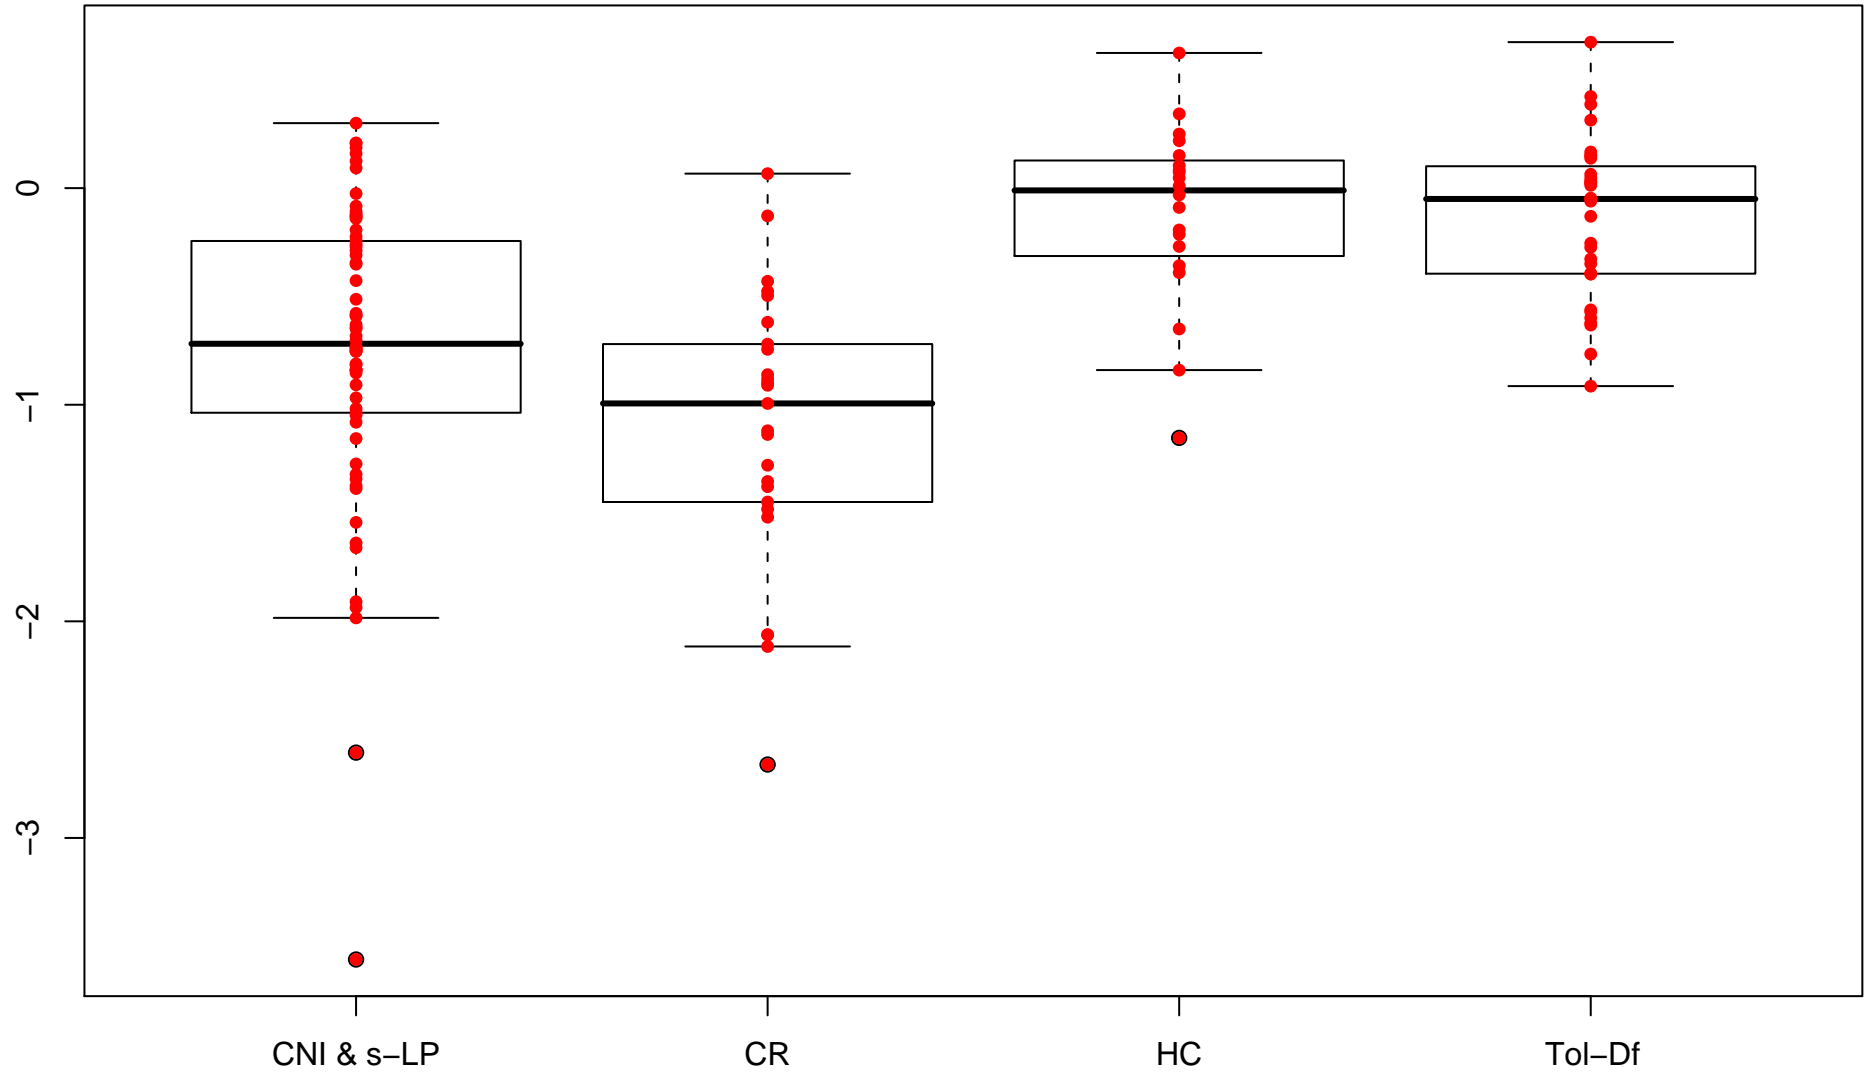

Rank 9 : PCDH9  
8.099e-10

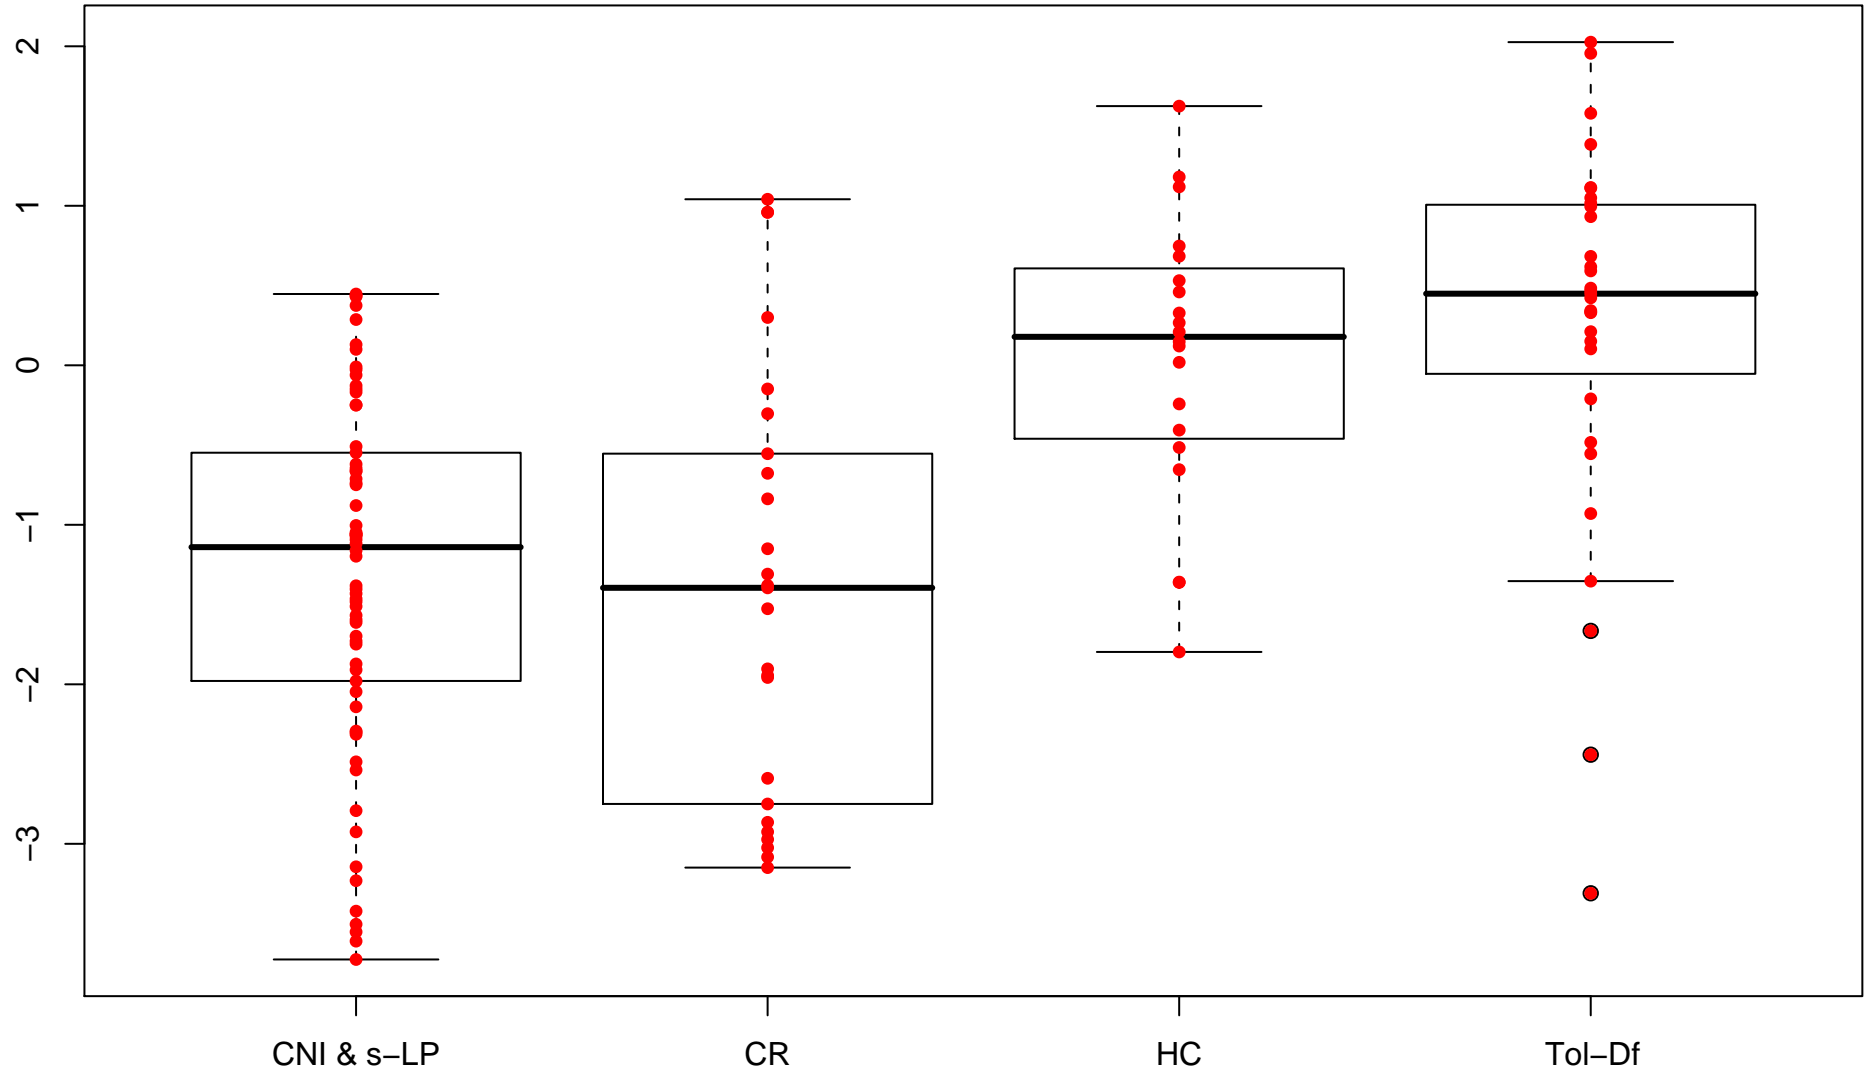

Rank 10 : THC2317432  
8.651e-10

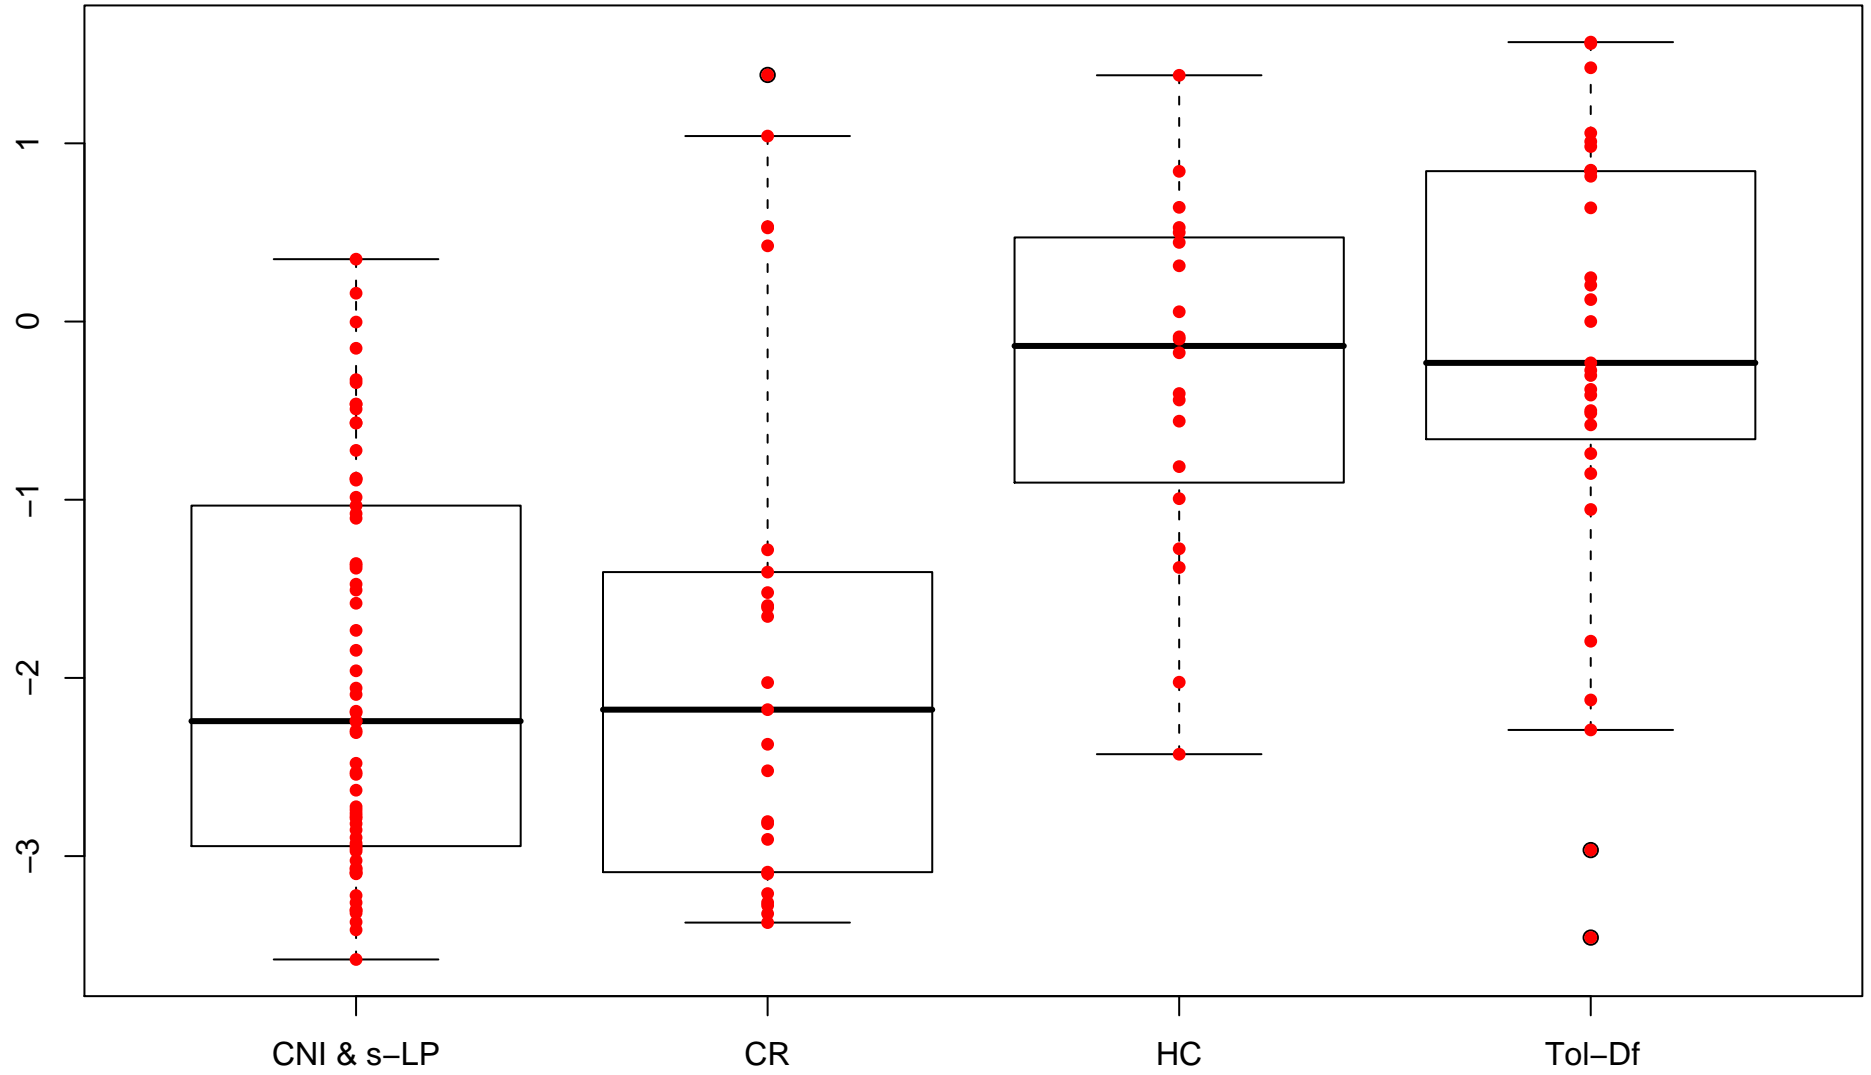

Rank 11 : IGKV3-20  
1.2947e-09

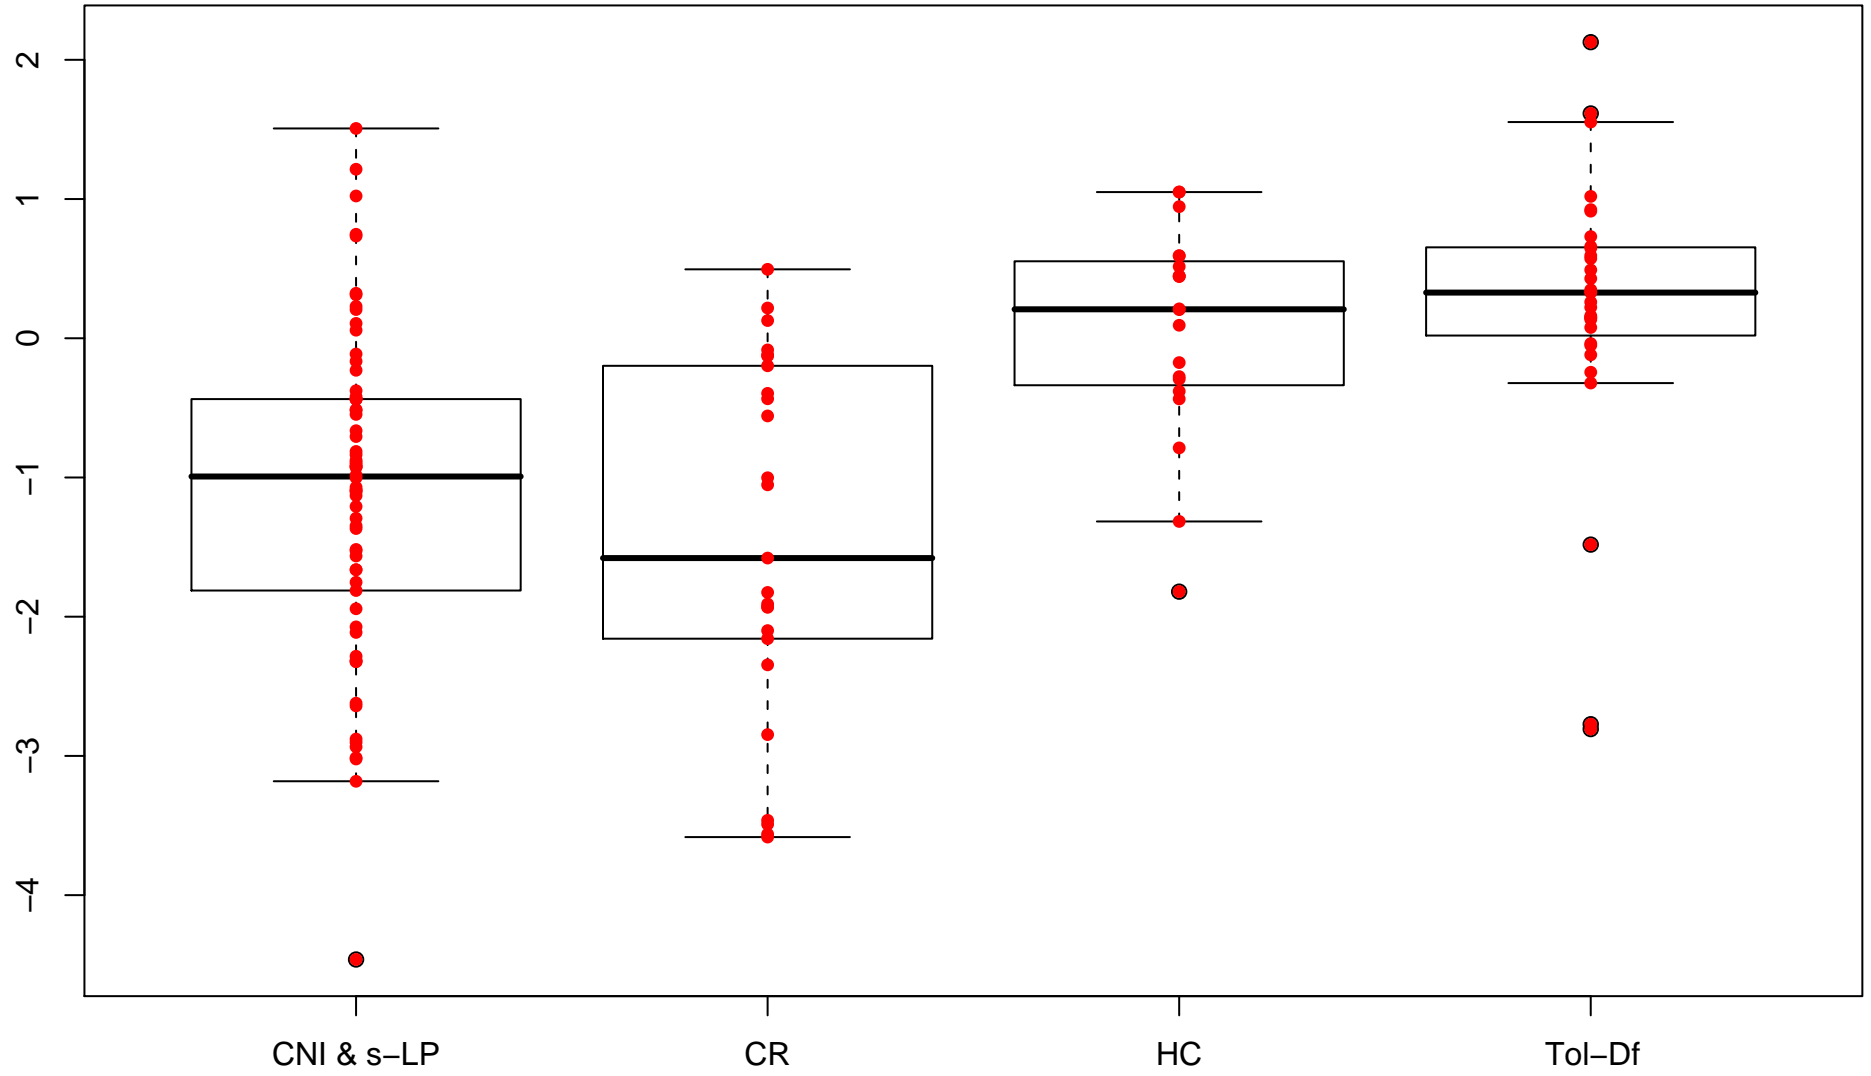

Rank 12 : CD79B  
1.5024e-09

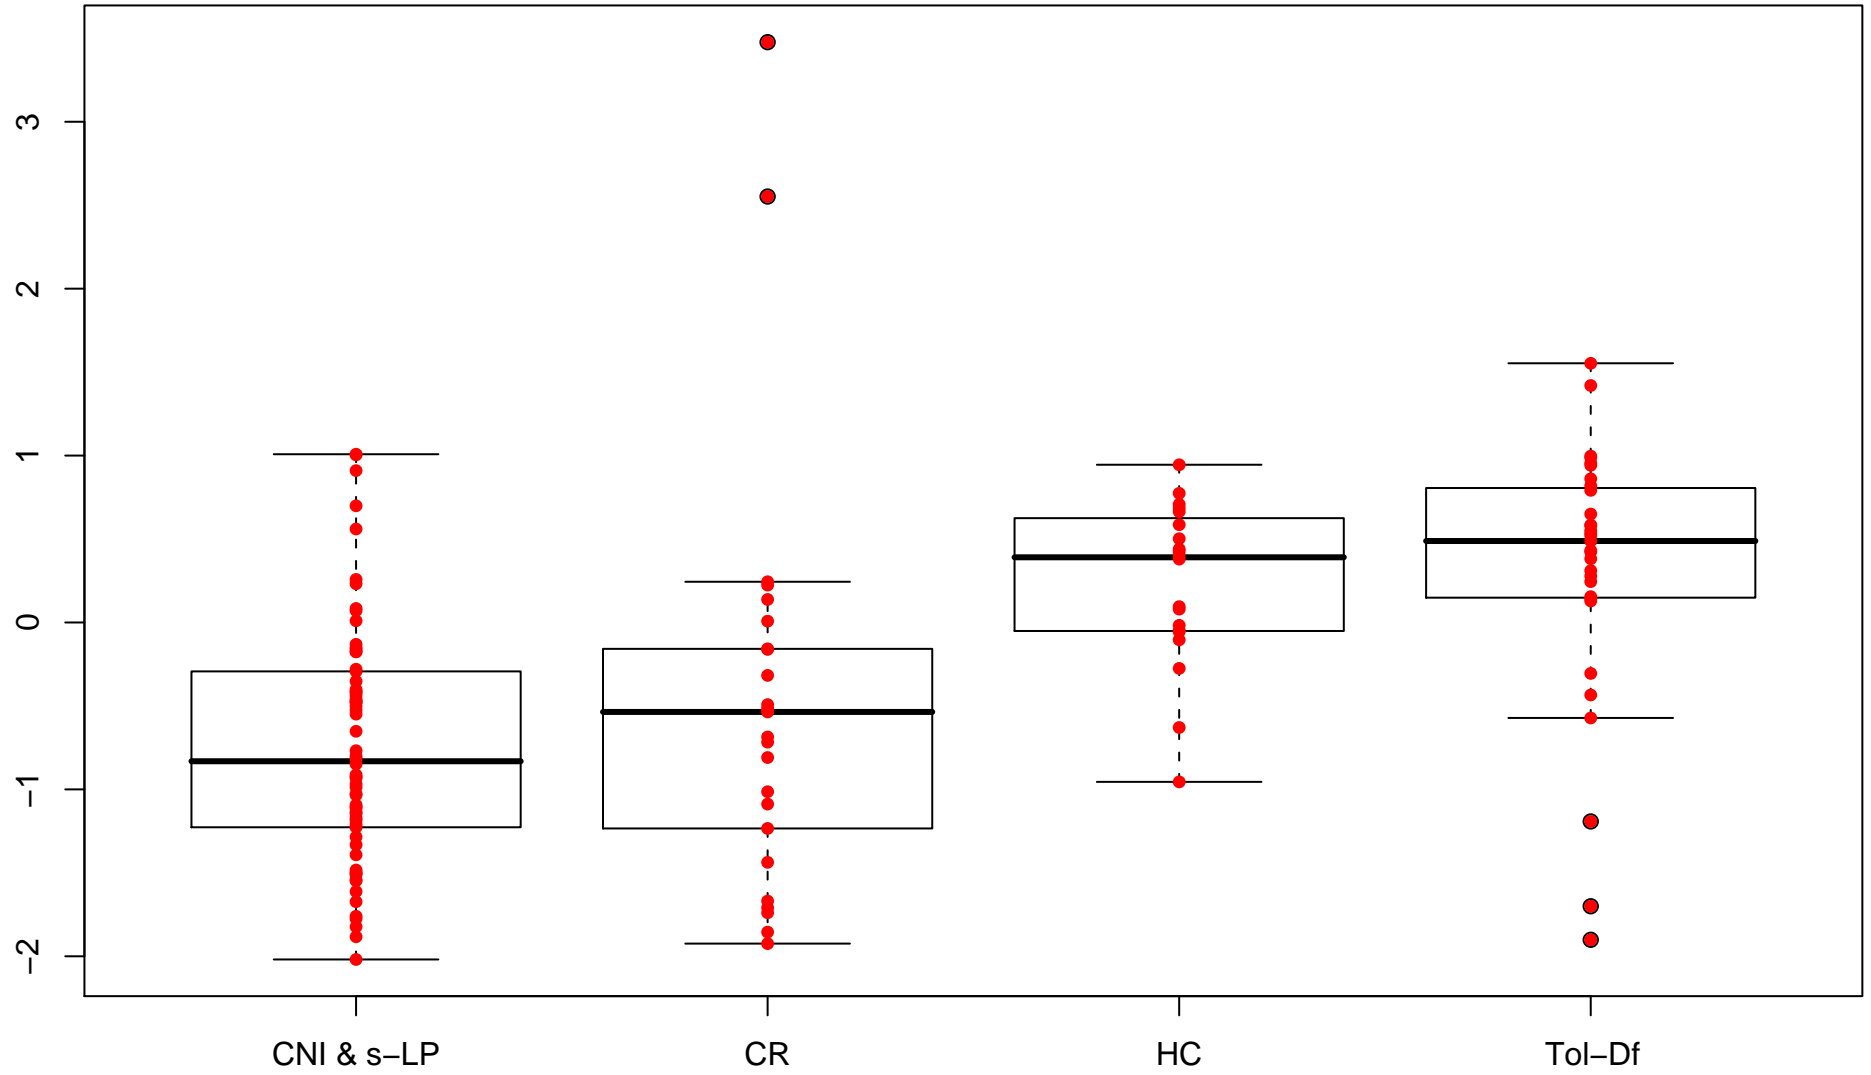

Rank 13 : IGHM  
1.6126e-09

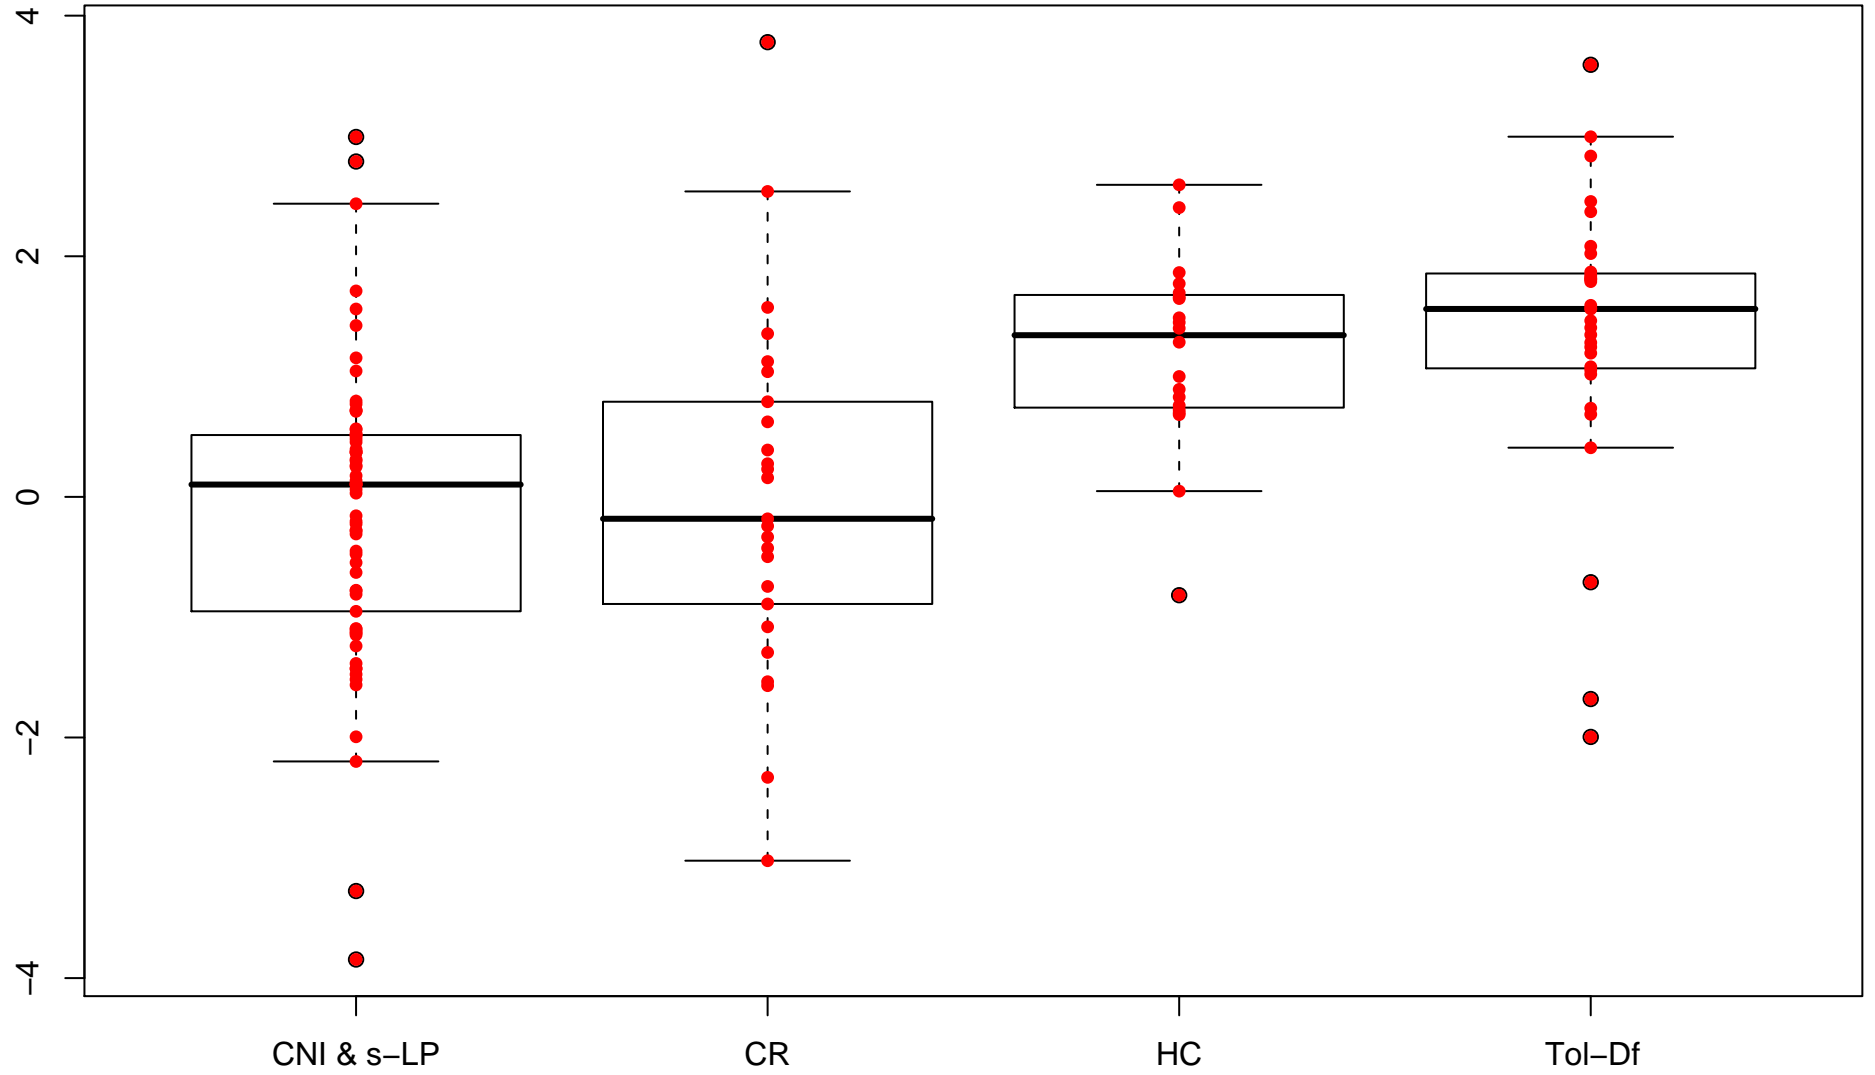

Rank 14 : MGC29506  
1.6481e-09

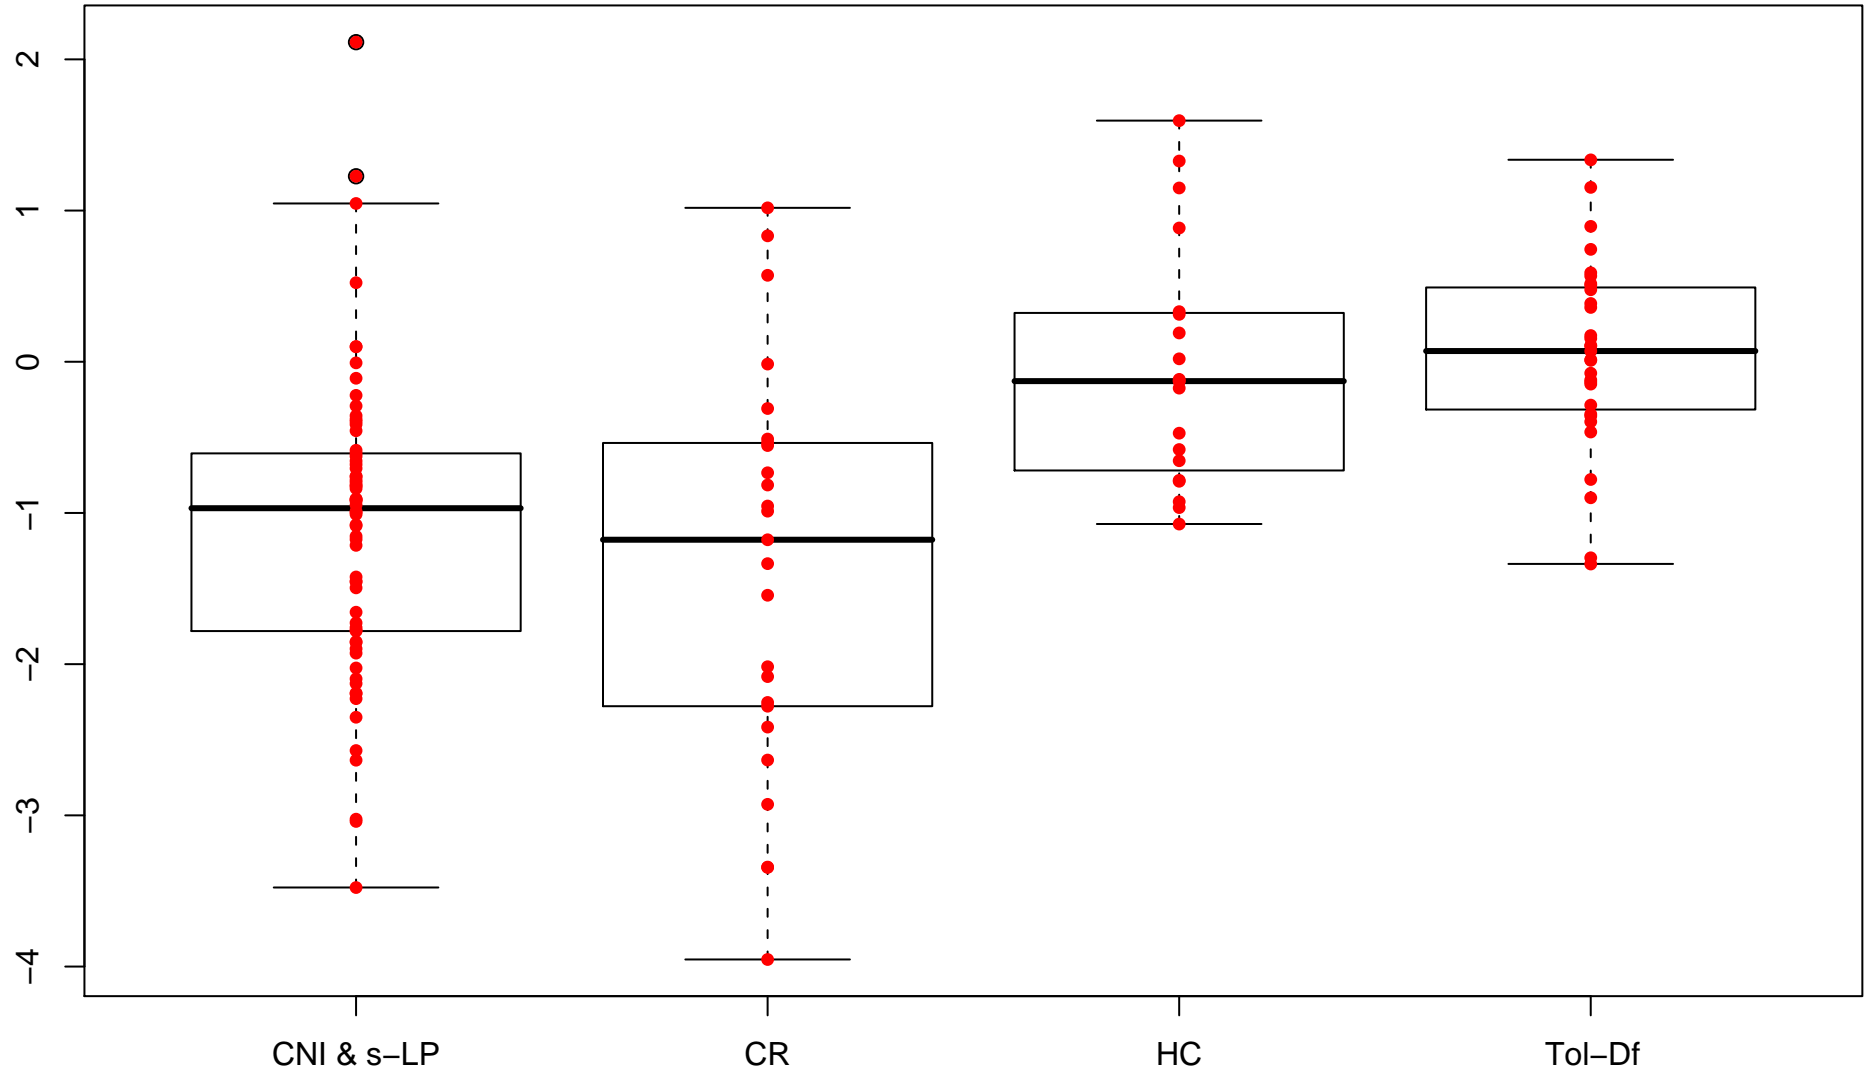

Rank 15 : IGKC  
1.6747e-09

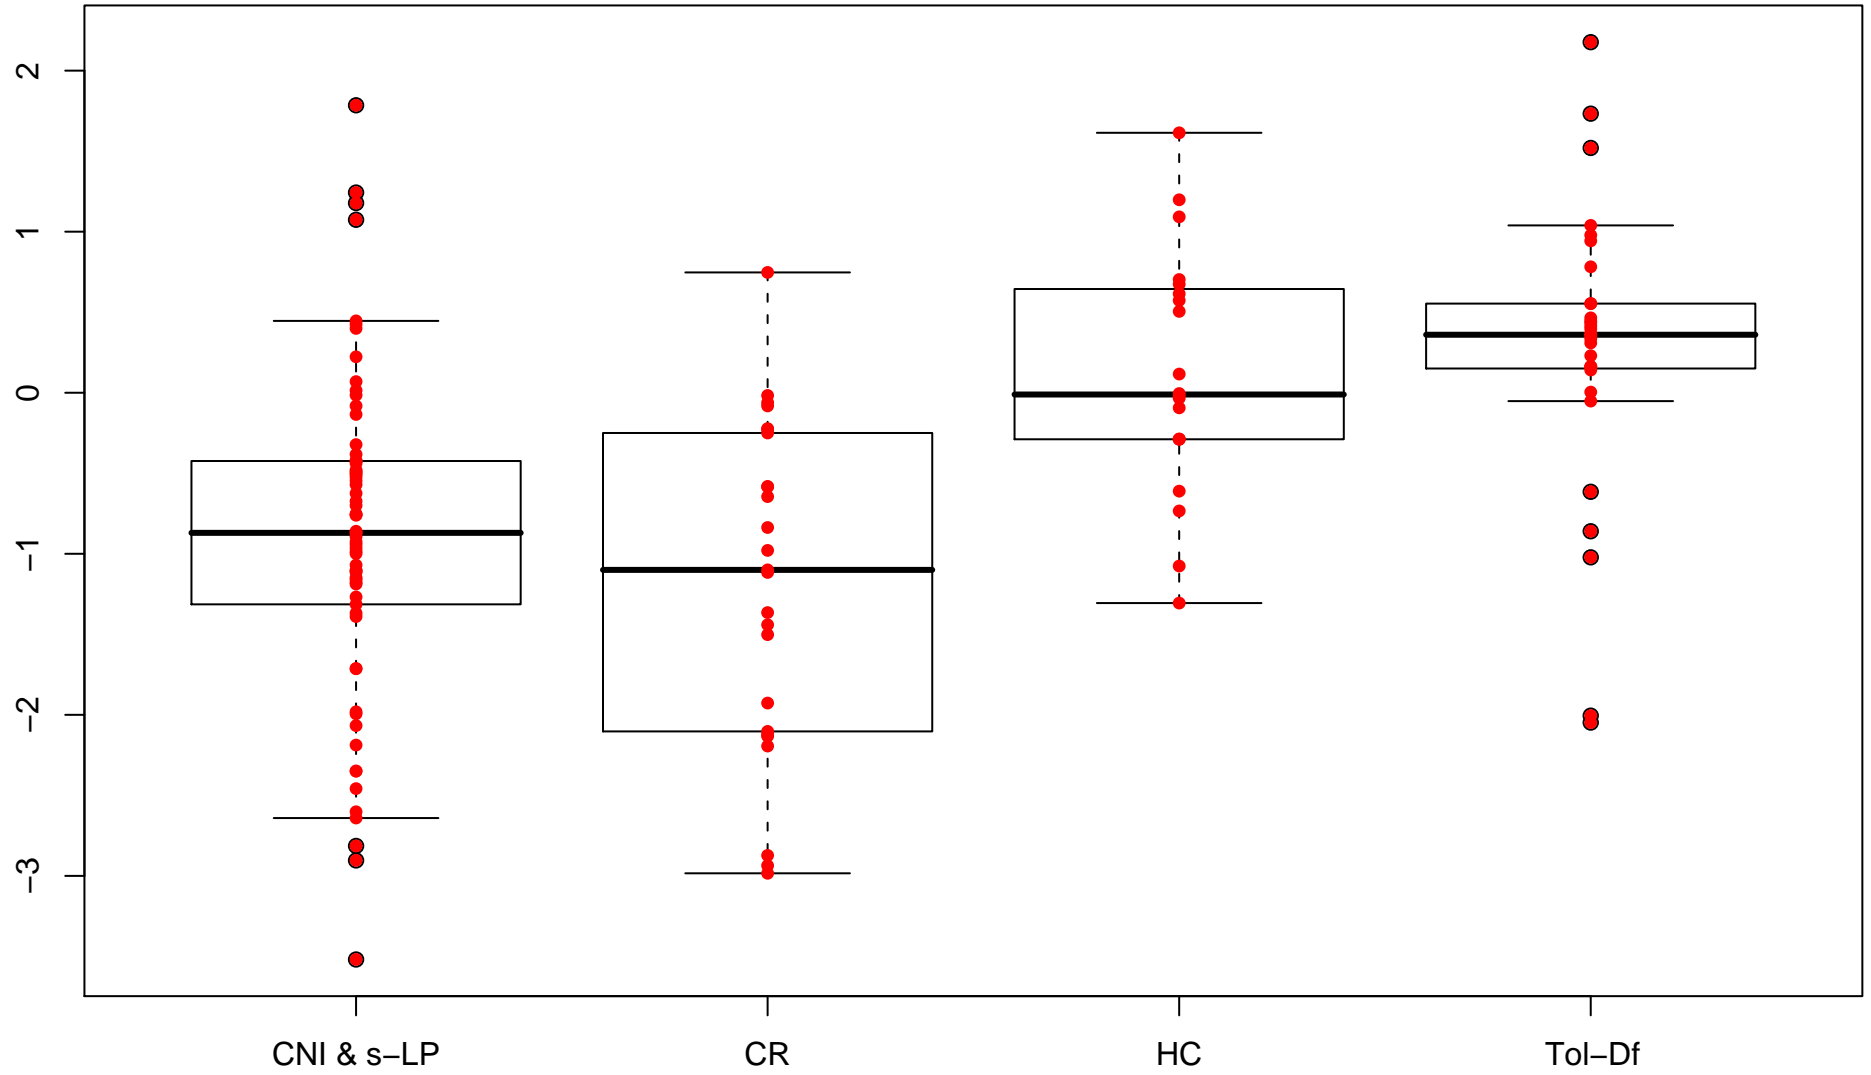



Rank 16 : CD247  
1.895e-09

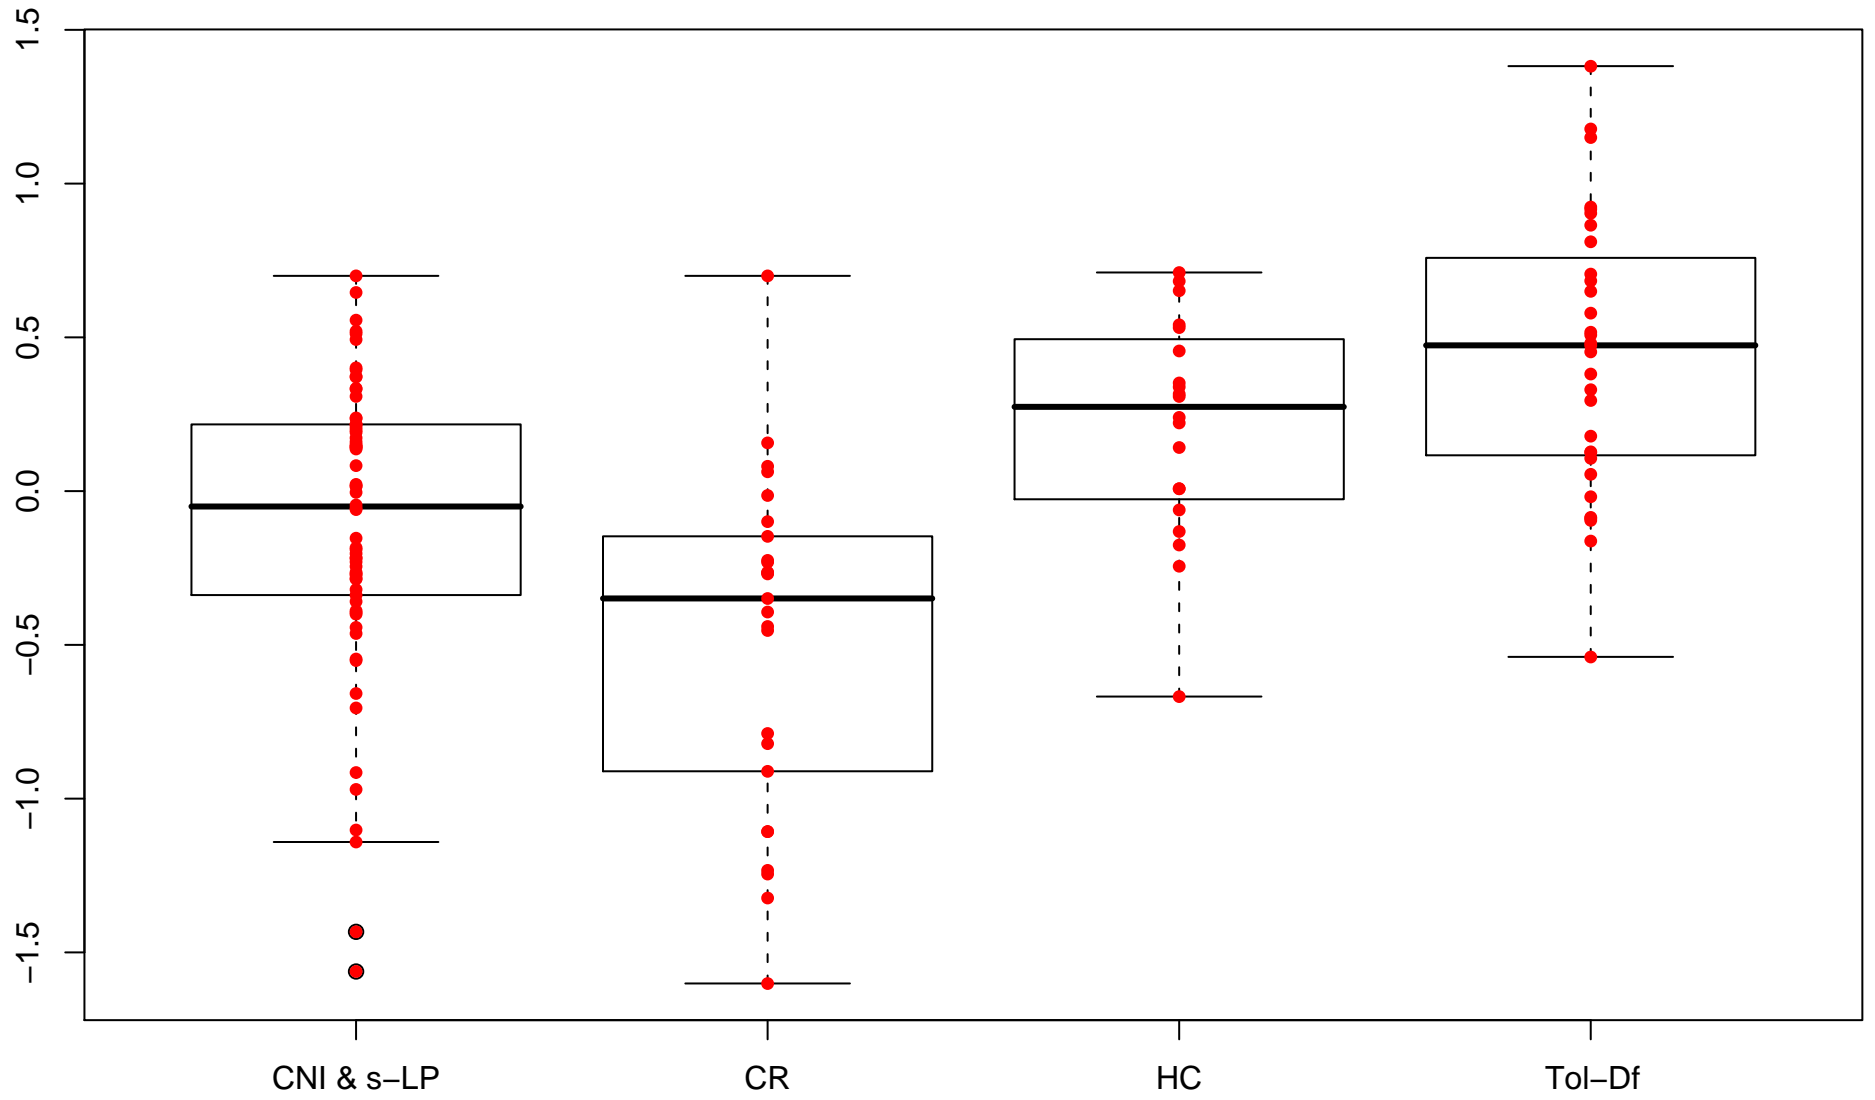

Rank 17 : BTG1  
2.1968e-09

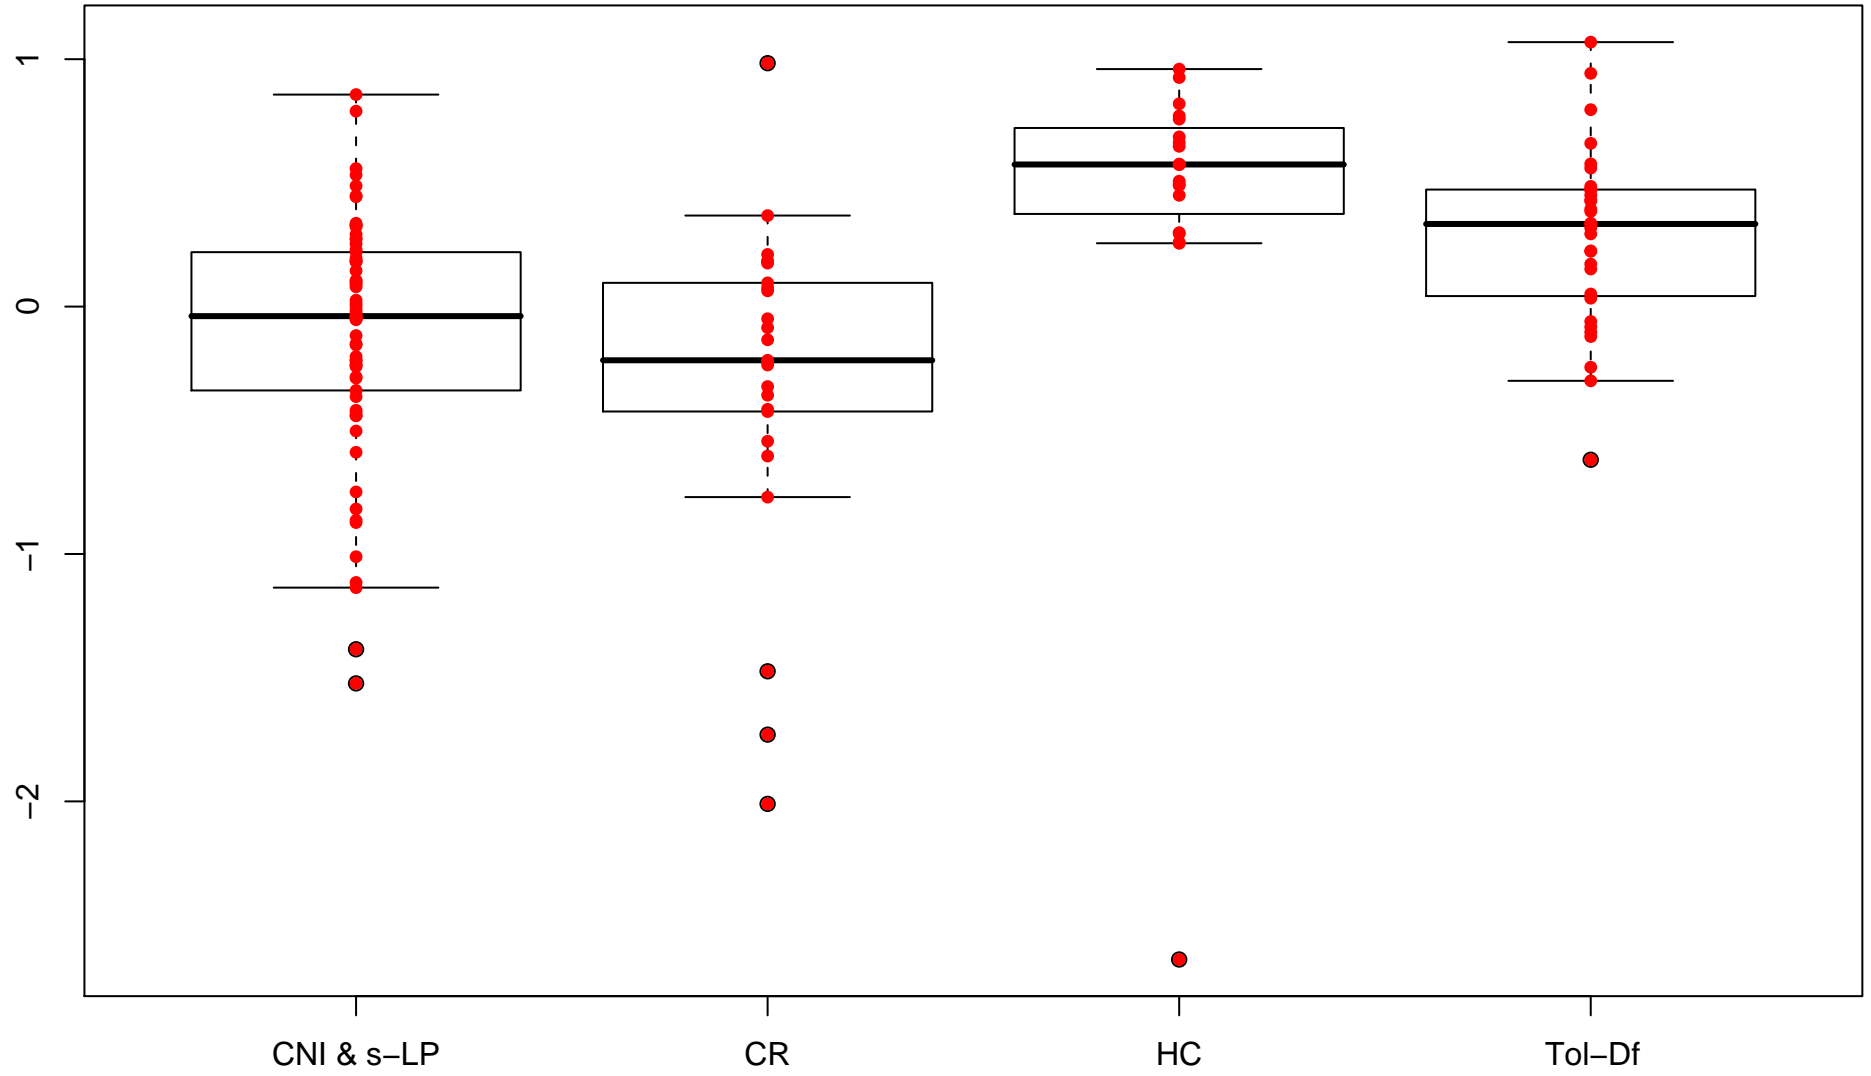

Rank 18 : LOC100132941  
2.3376e-09

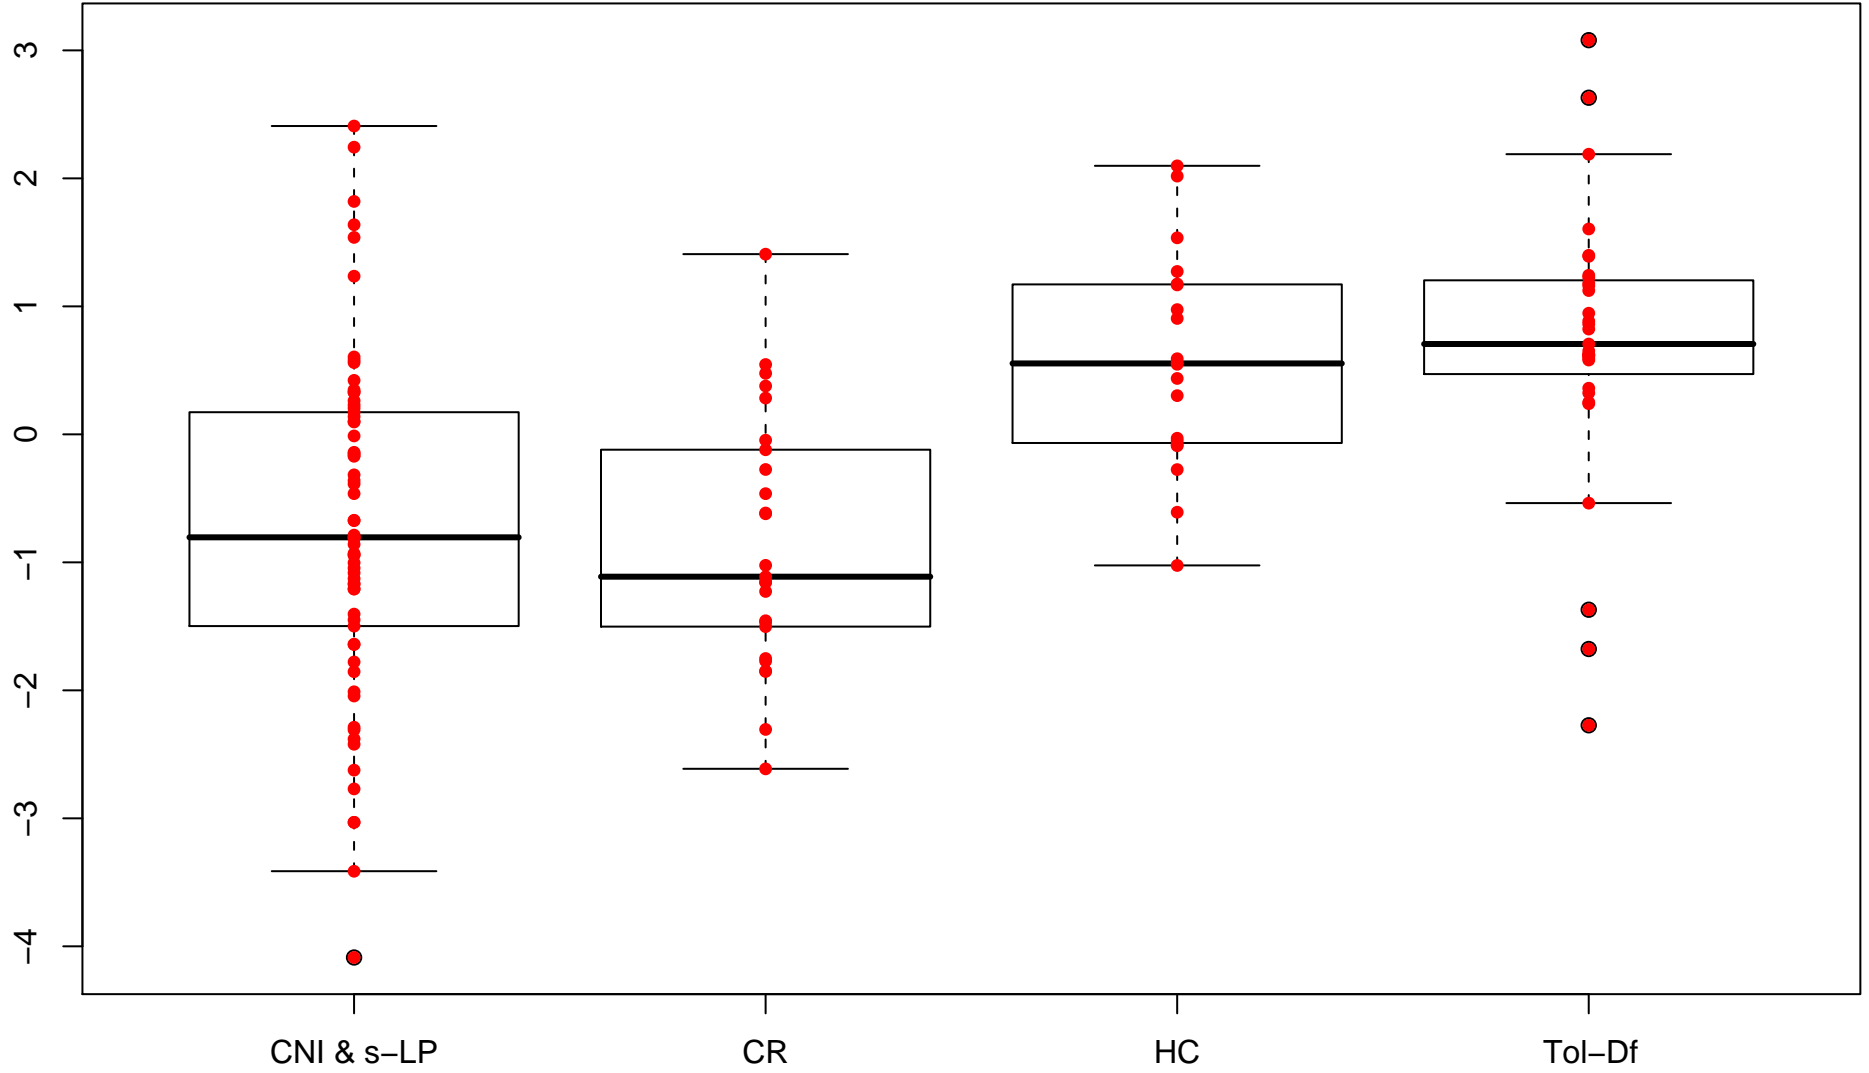

Rank 19 : MCTP1  
2.4322e-09

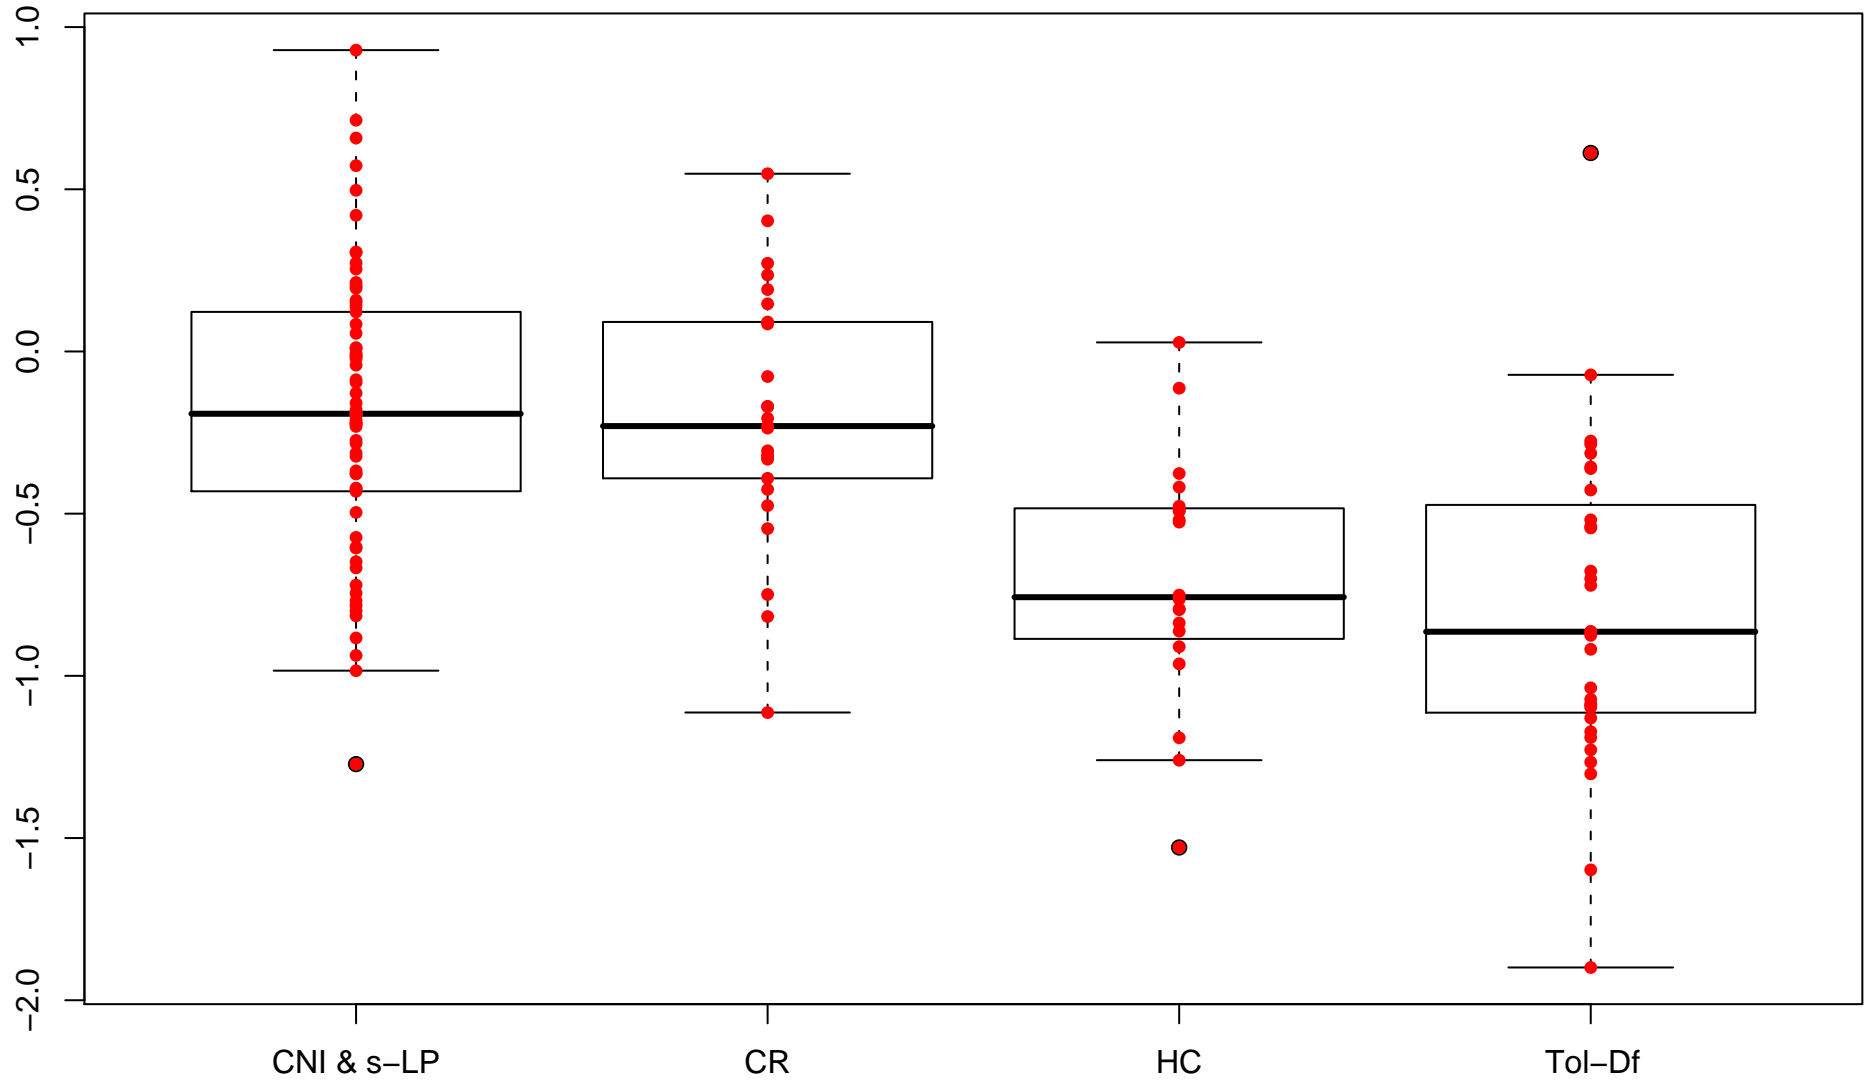

Rank 20 : BLNK  
3.0073e-09

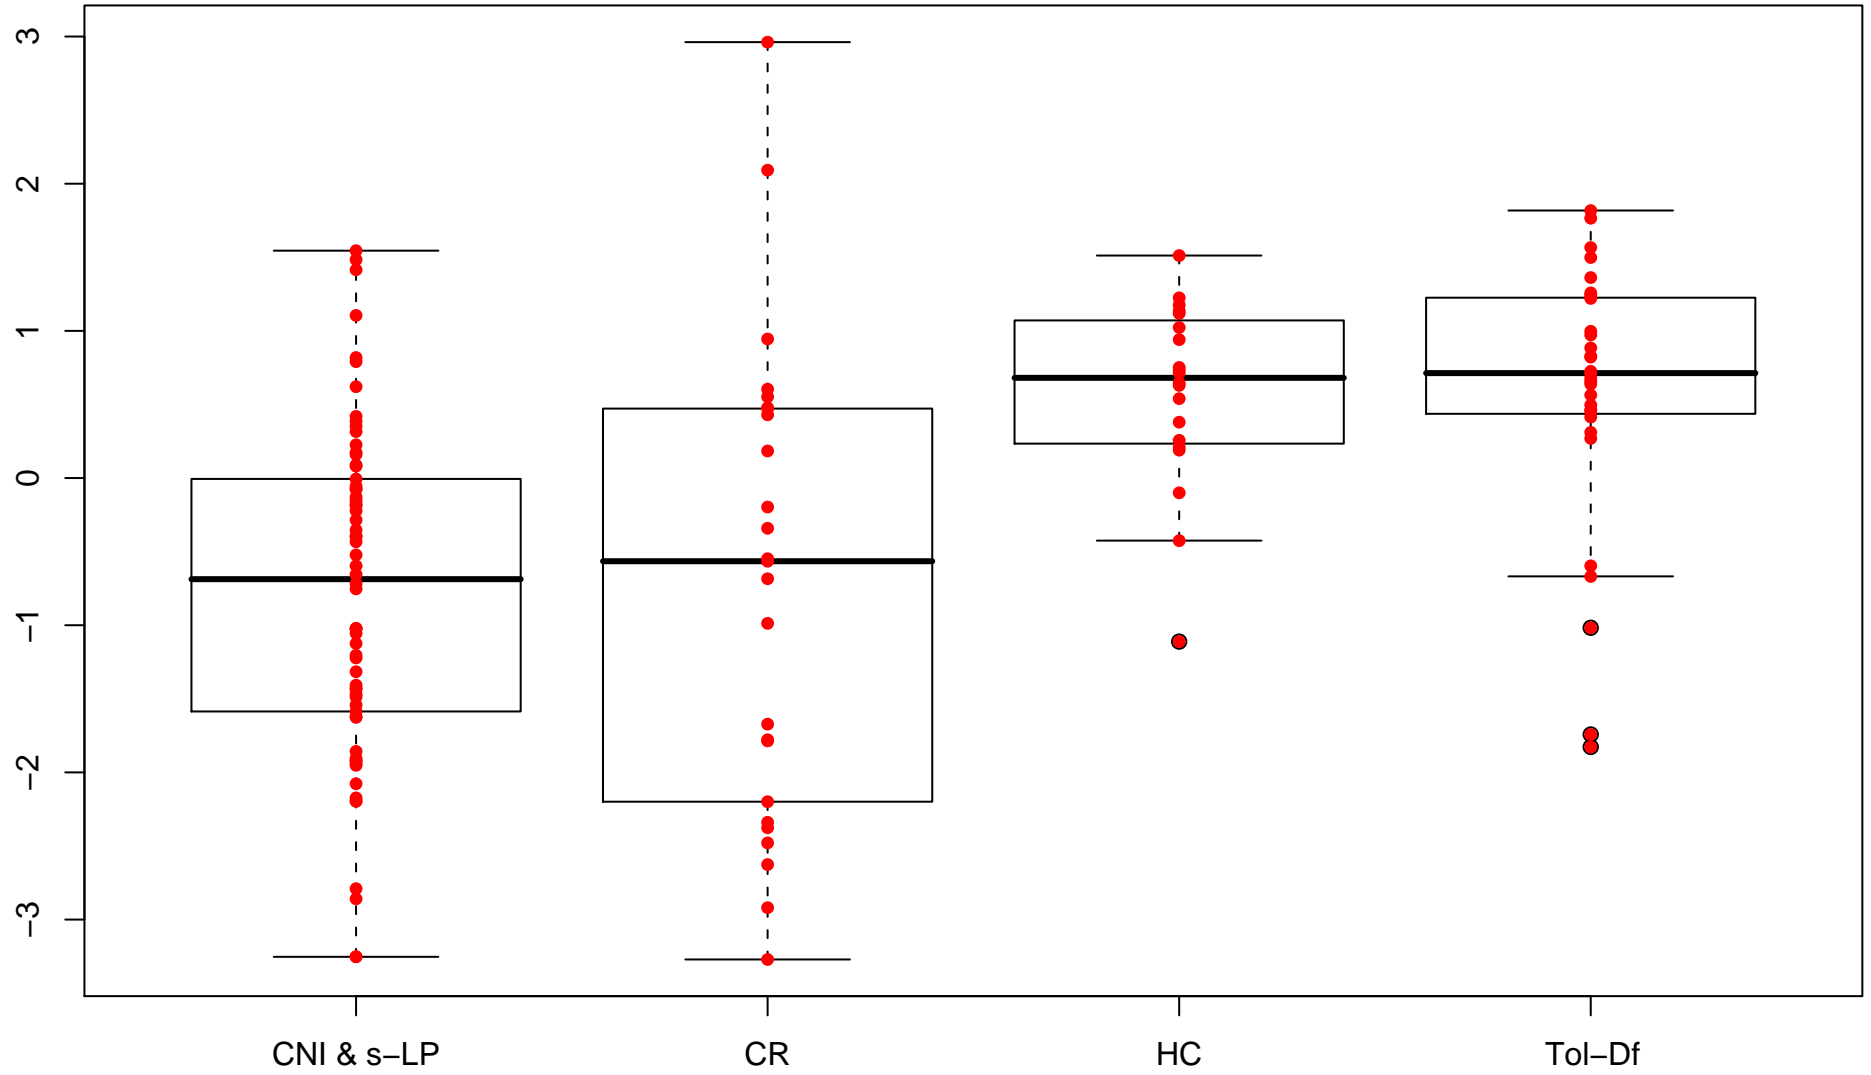

Rank 21 : LOC652494  
3.914e-09

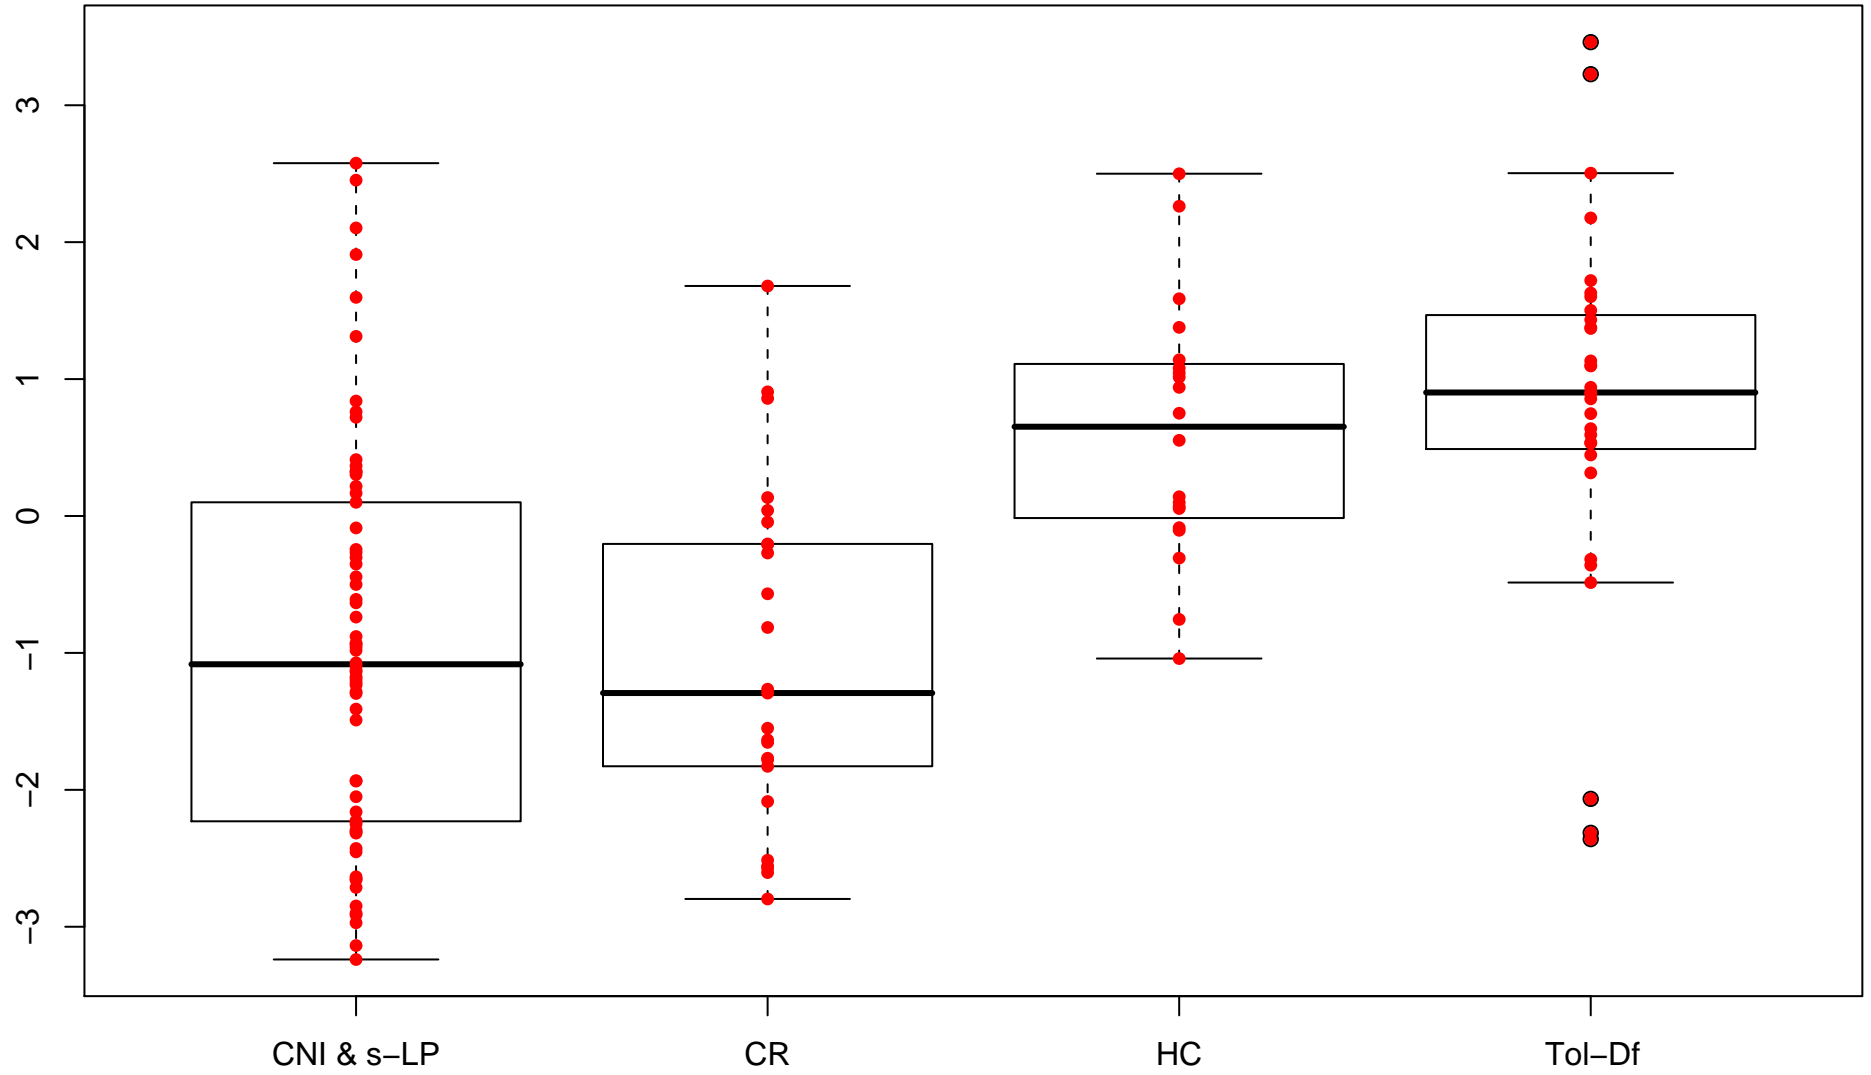

Rank 22 : RGS1  
5.146e-09

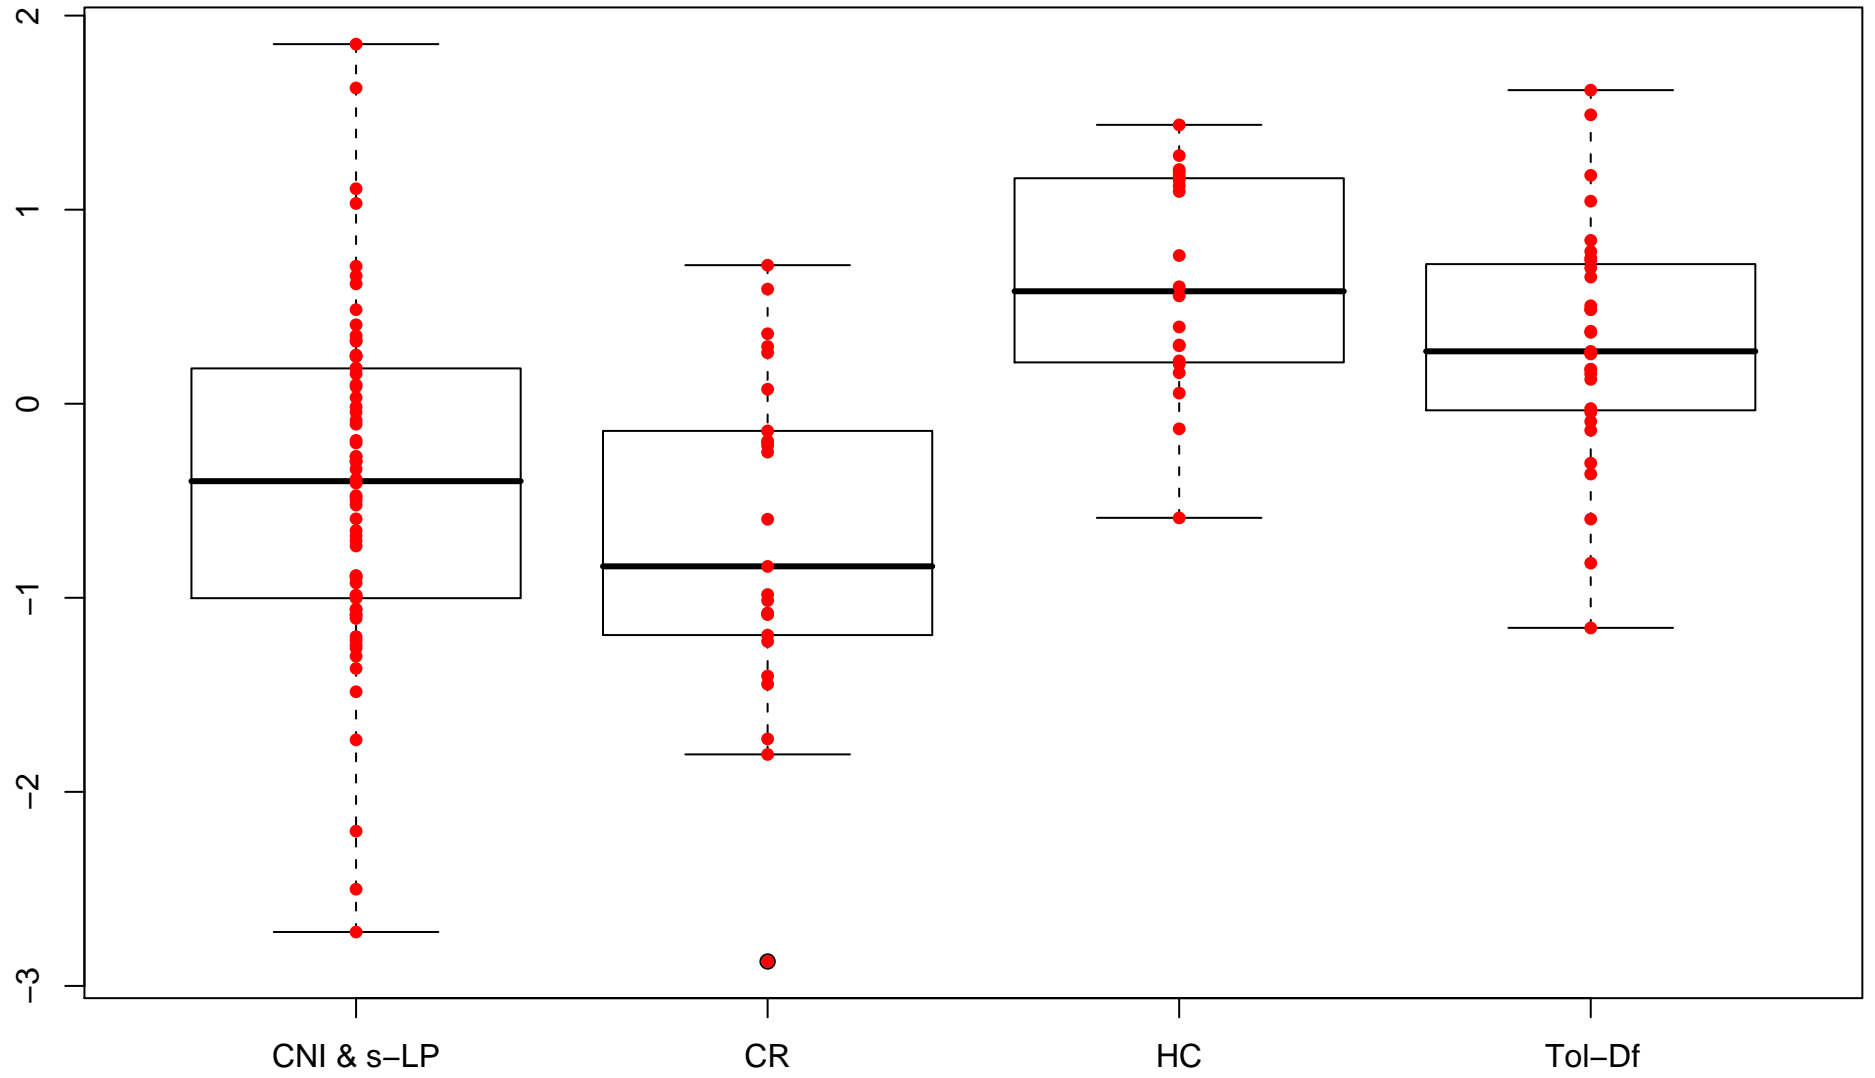

Rank 23 : AY062331  
5.701e-09

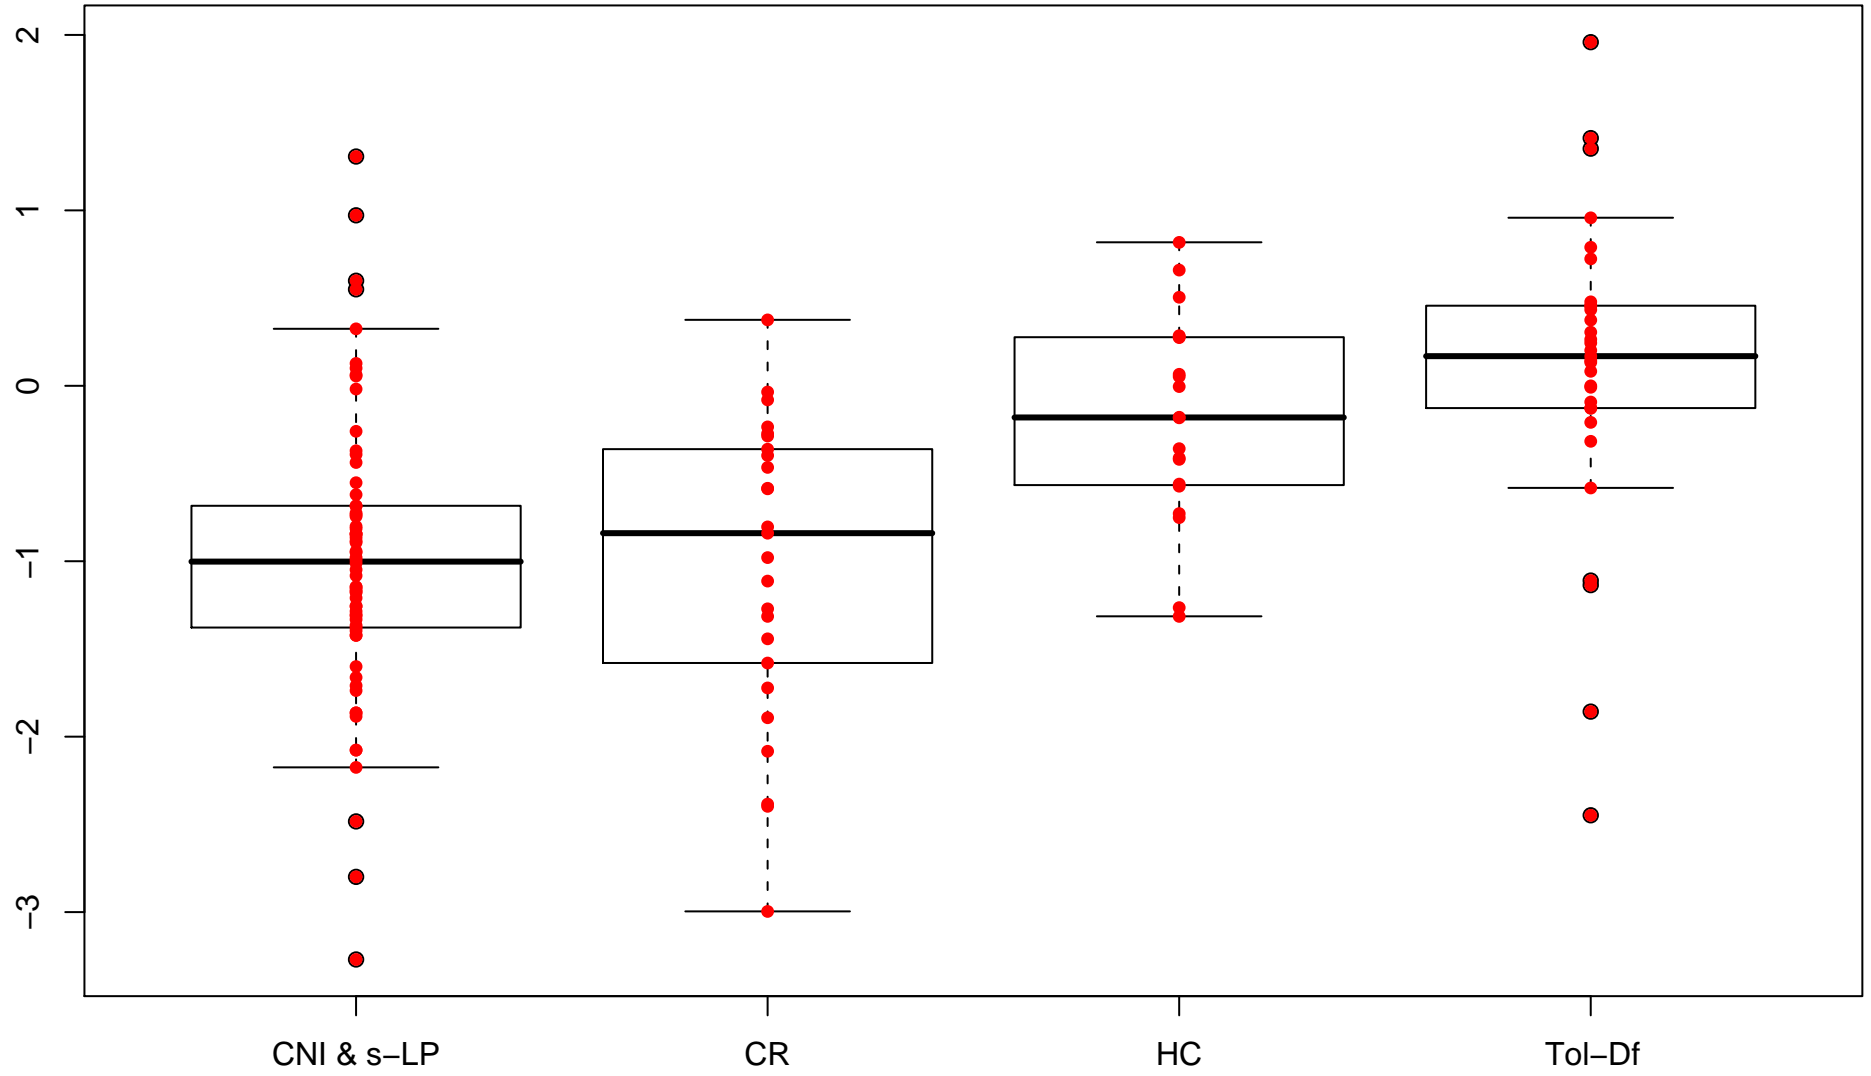



Rank 24 : ICOS  
5.855e-09

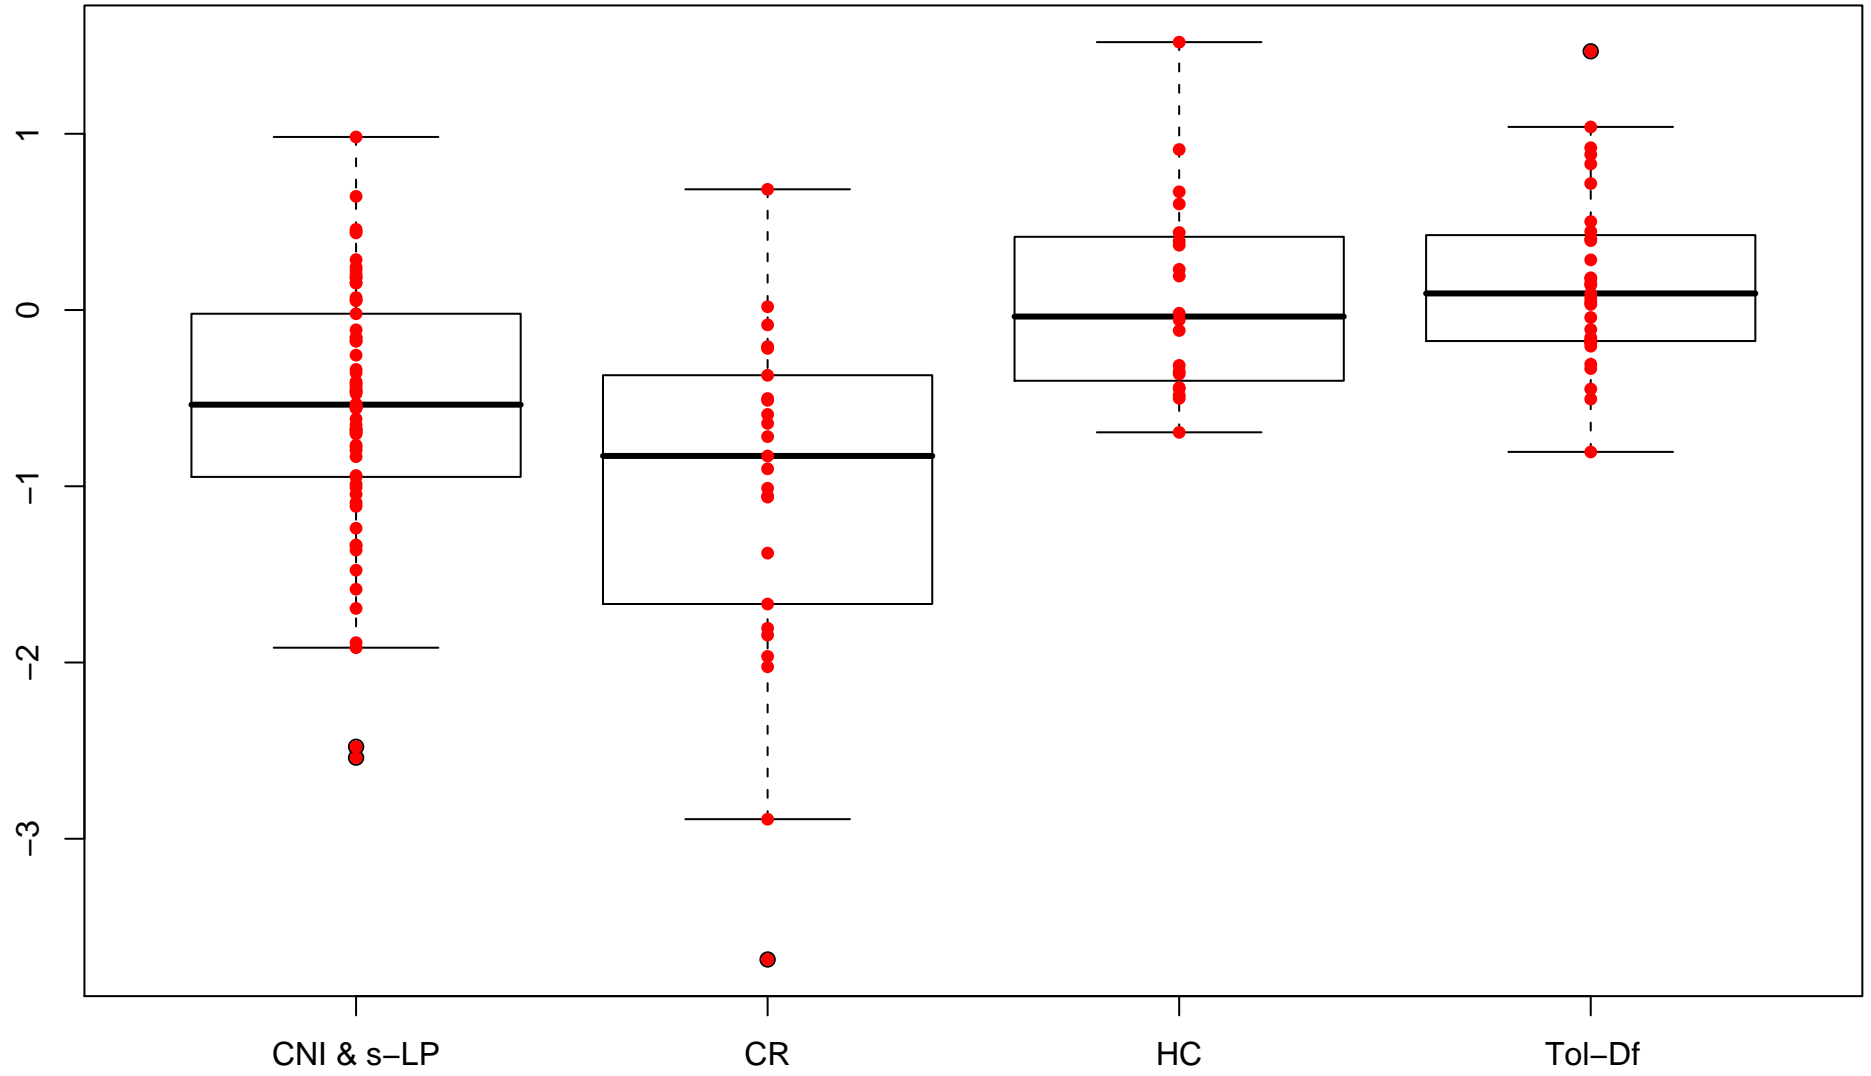

Rank 25 : CR613436  
6.421e-09

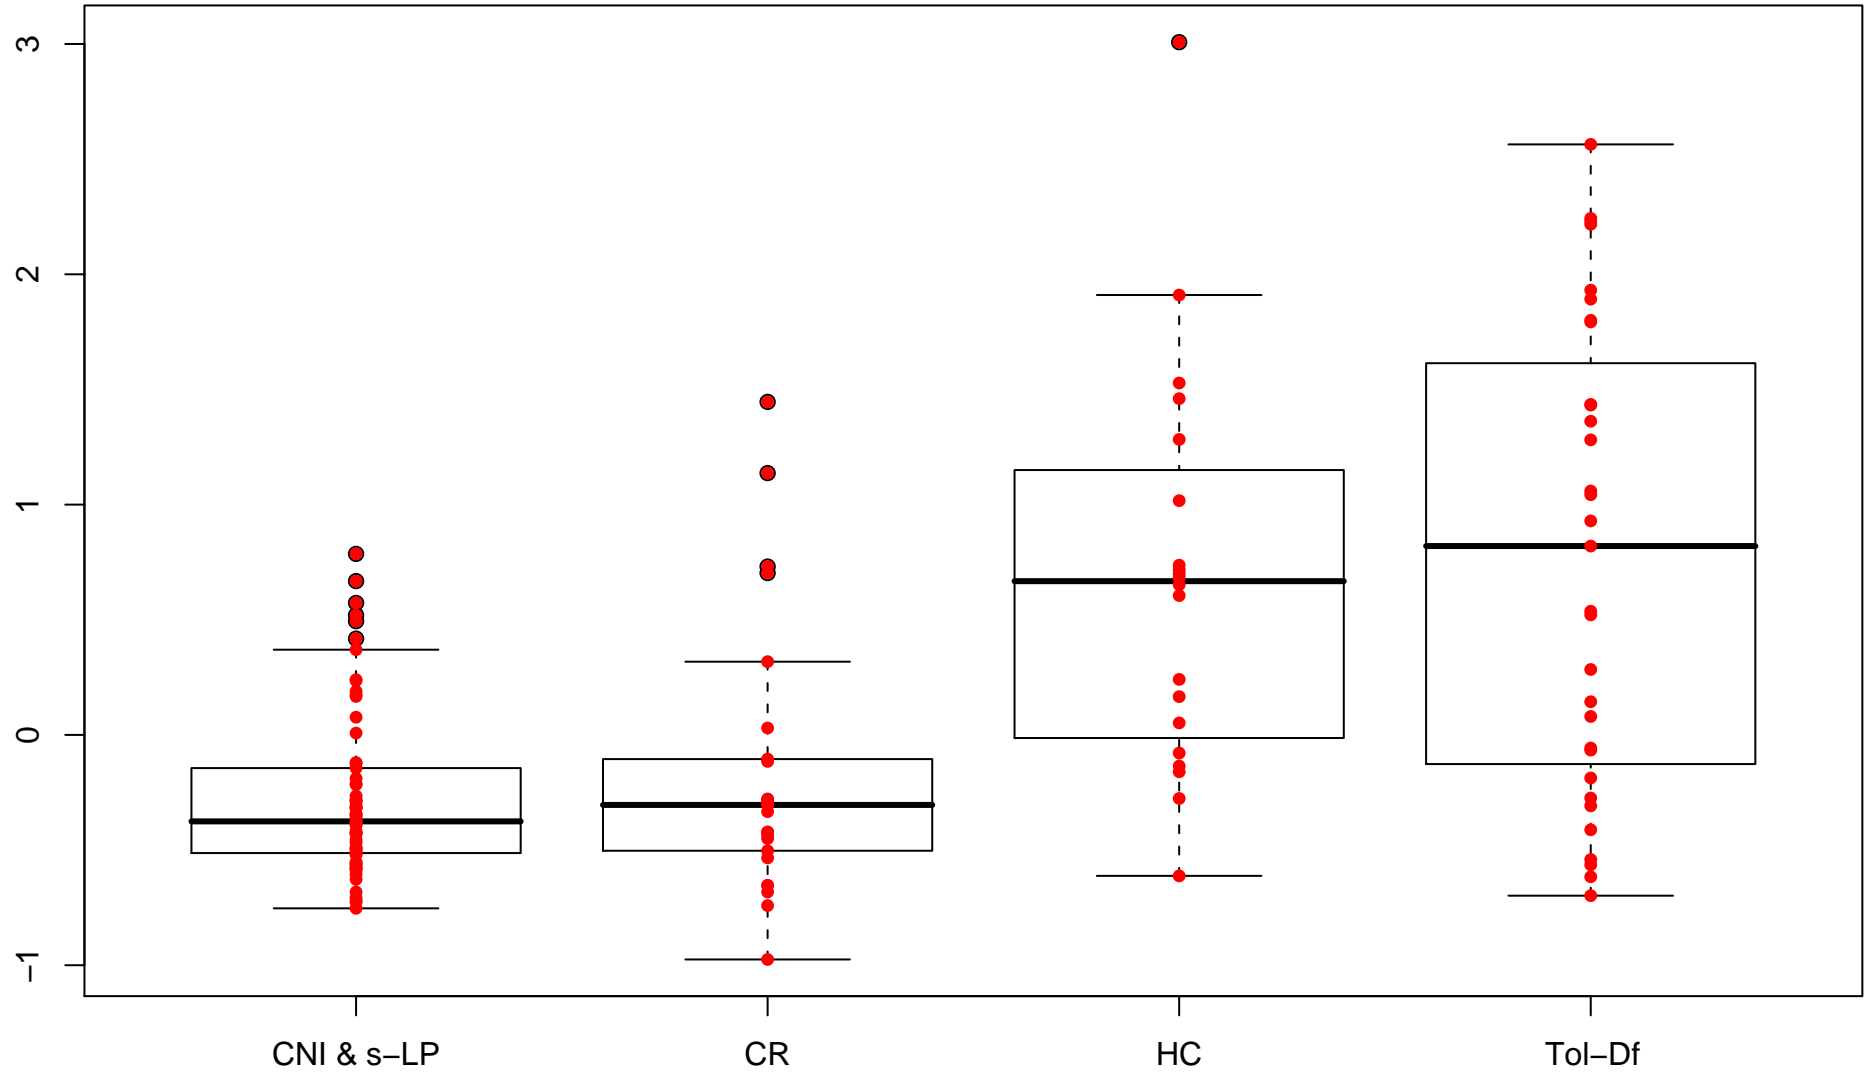

Rank 26 : IGJ  
7.149e-09

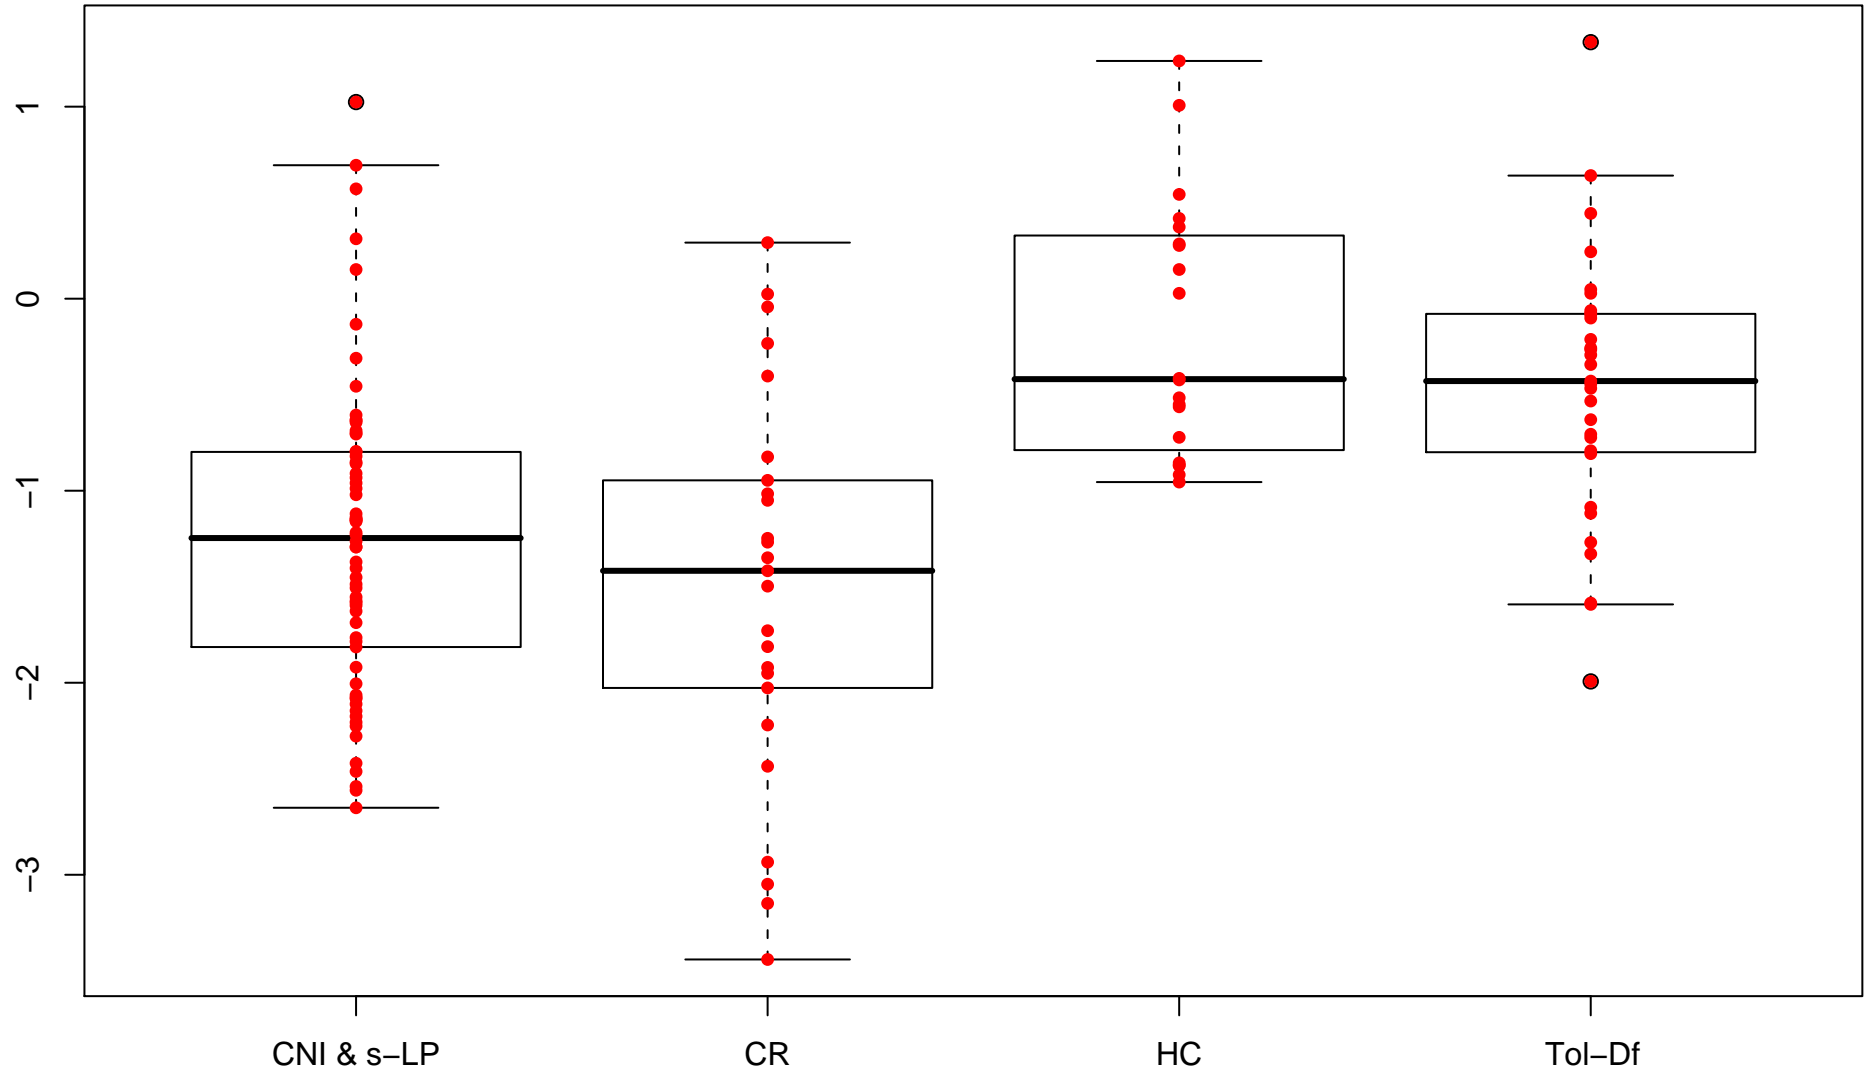

Rank 27 : BMP2K  
9.514e-09

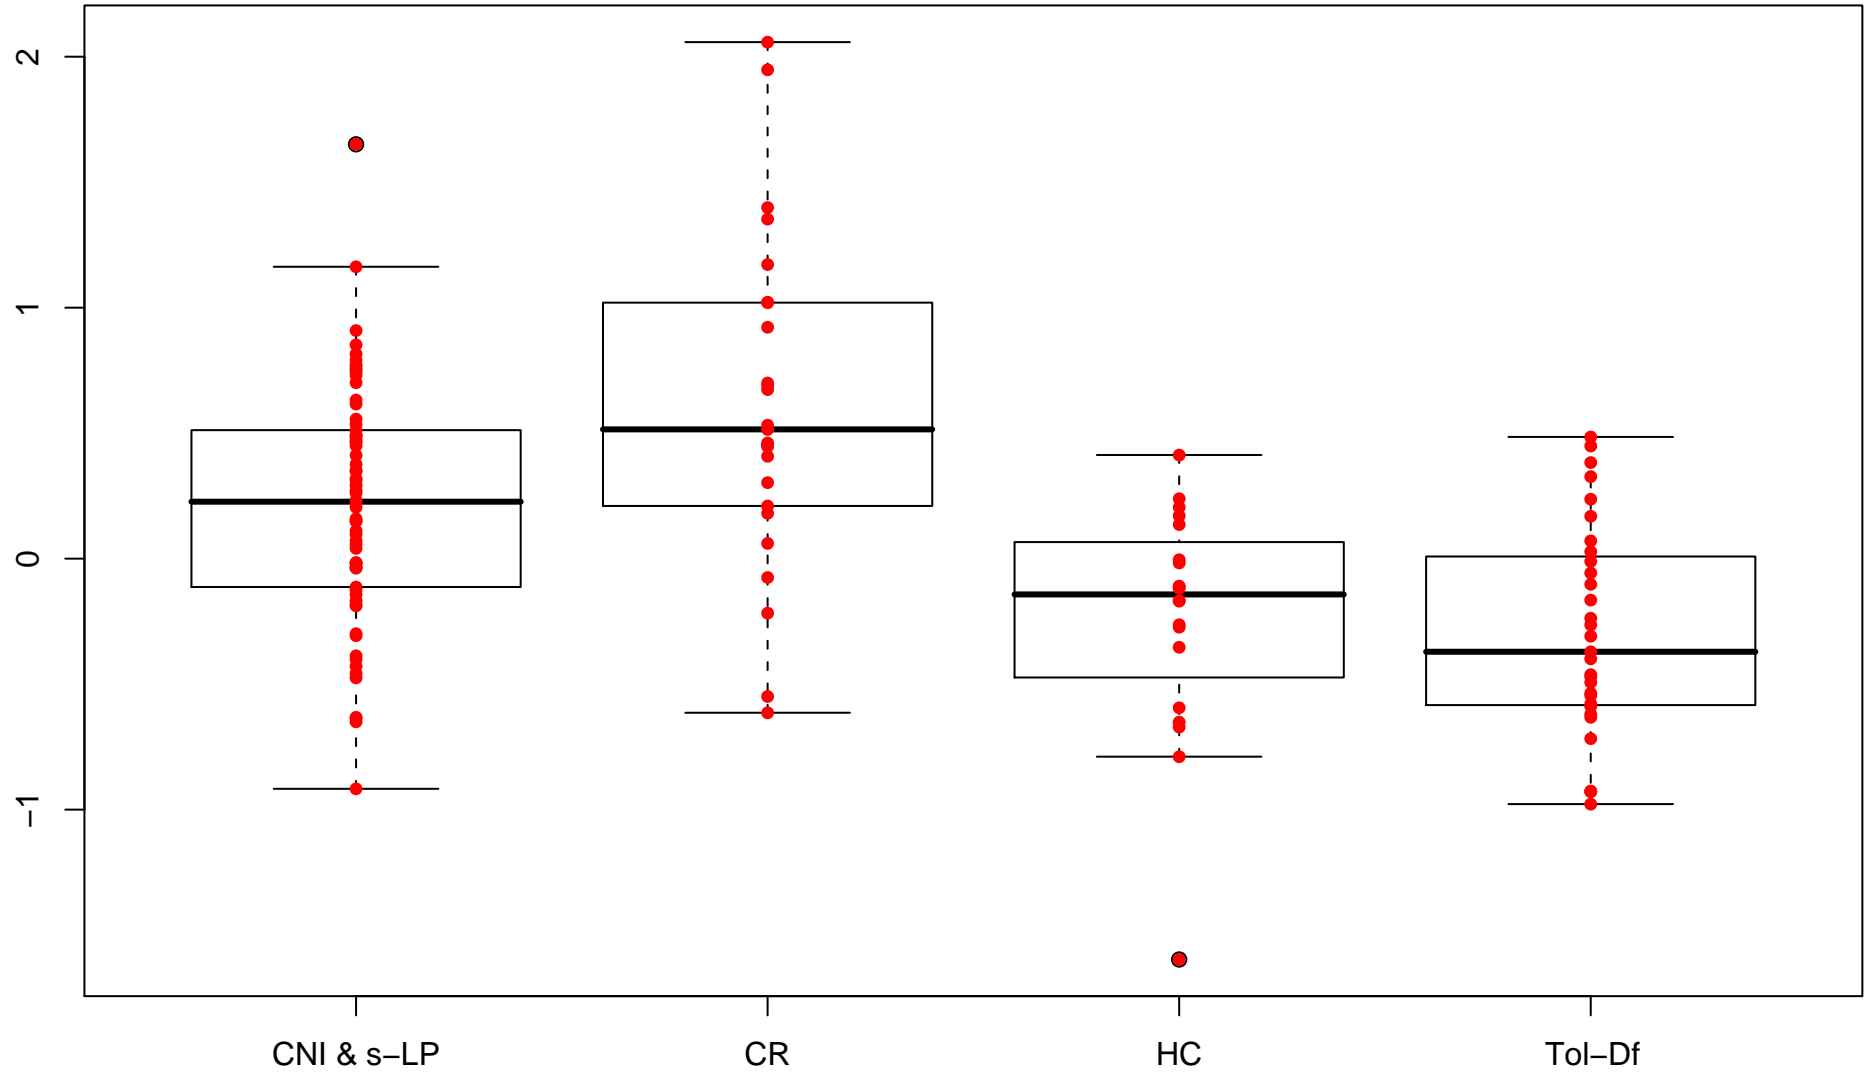

Rank 28 : BTLA  
1.069e-08

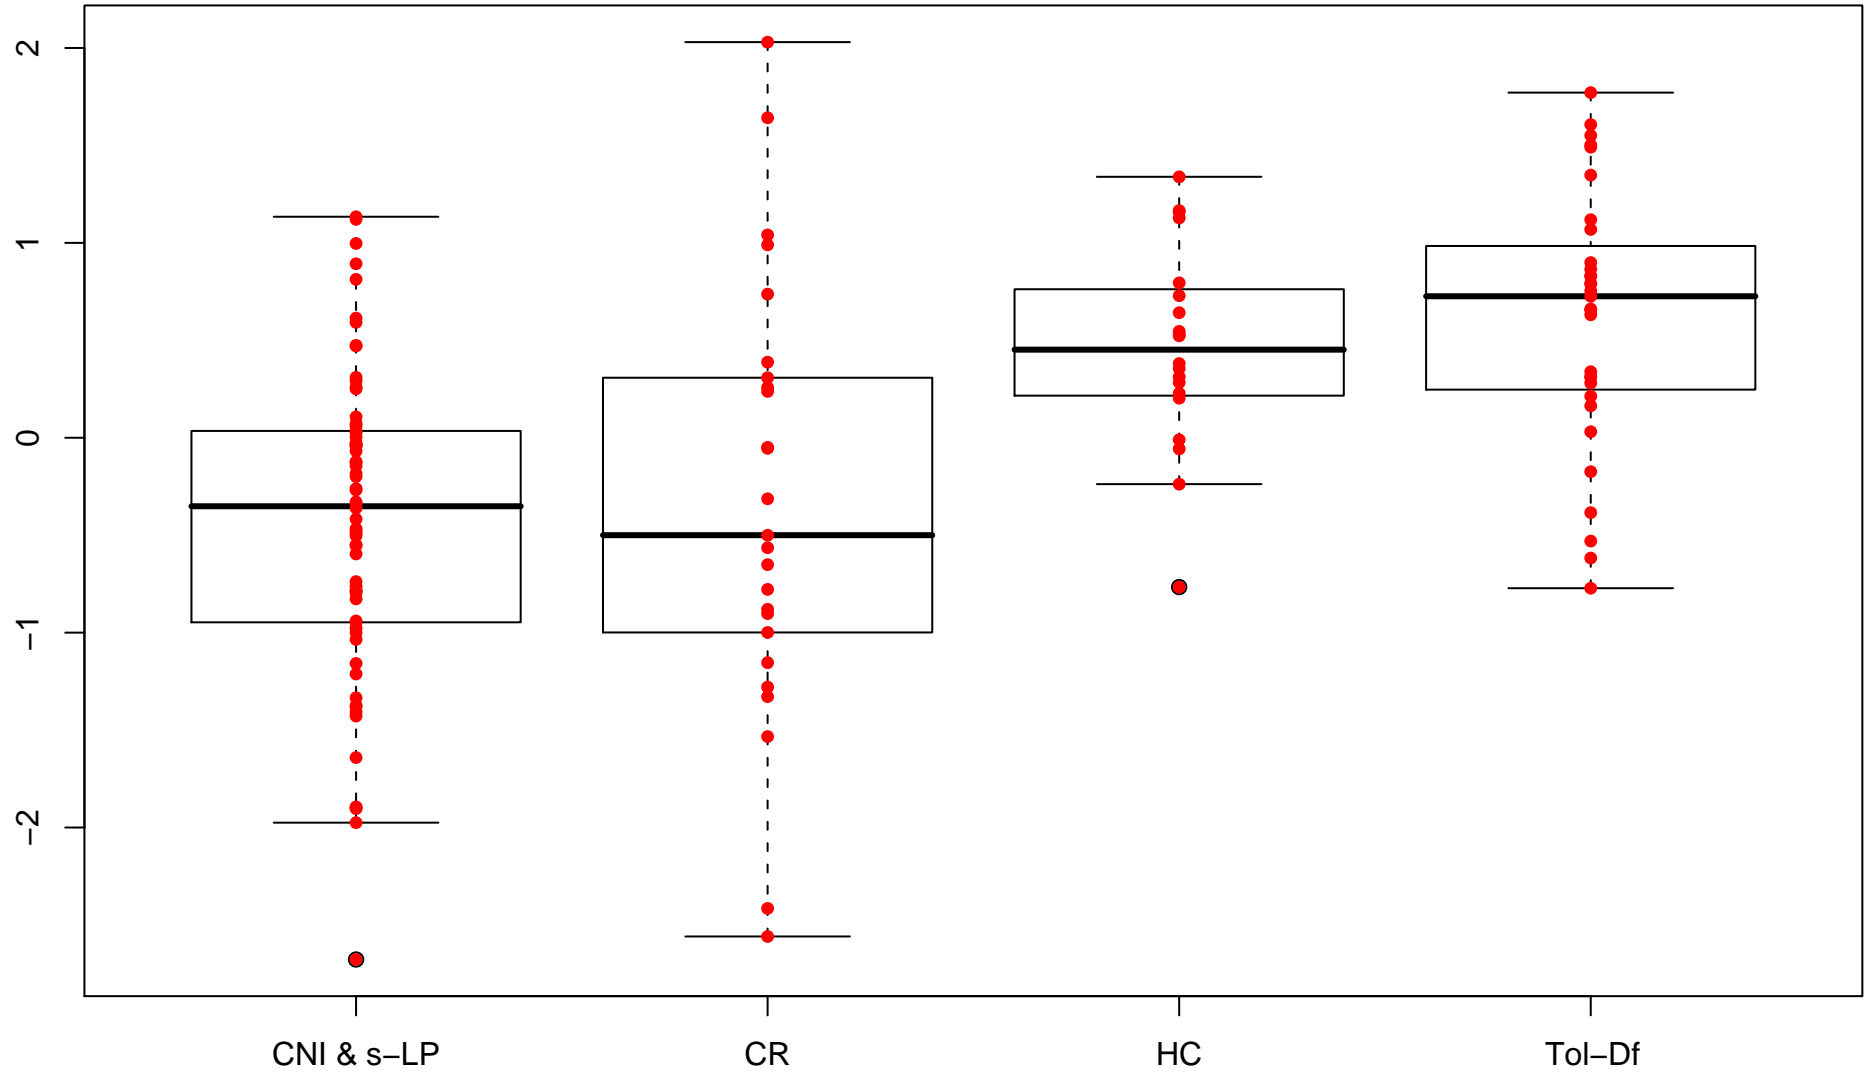

Rank 29 : CD79A  
1.1756e-08

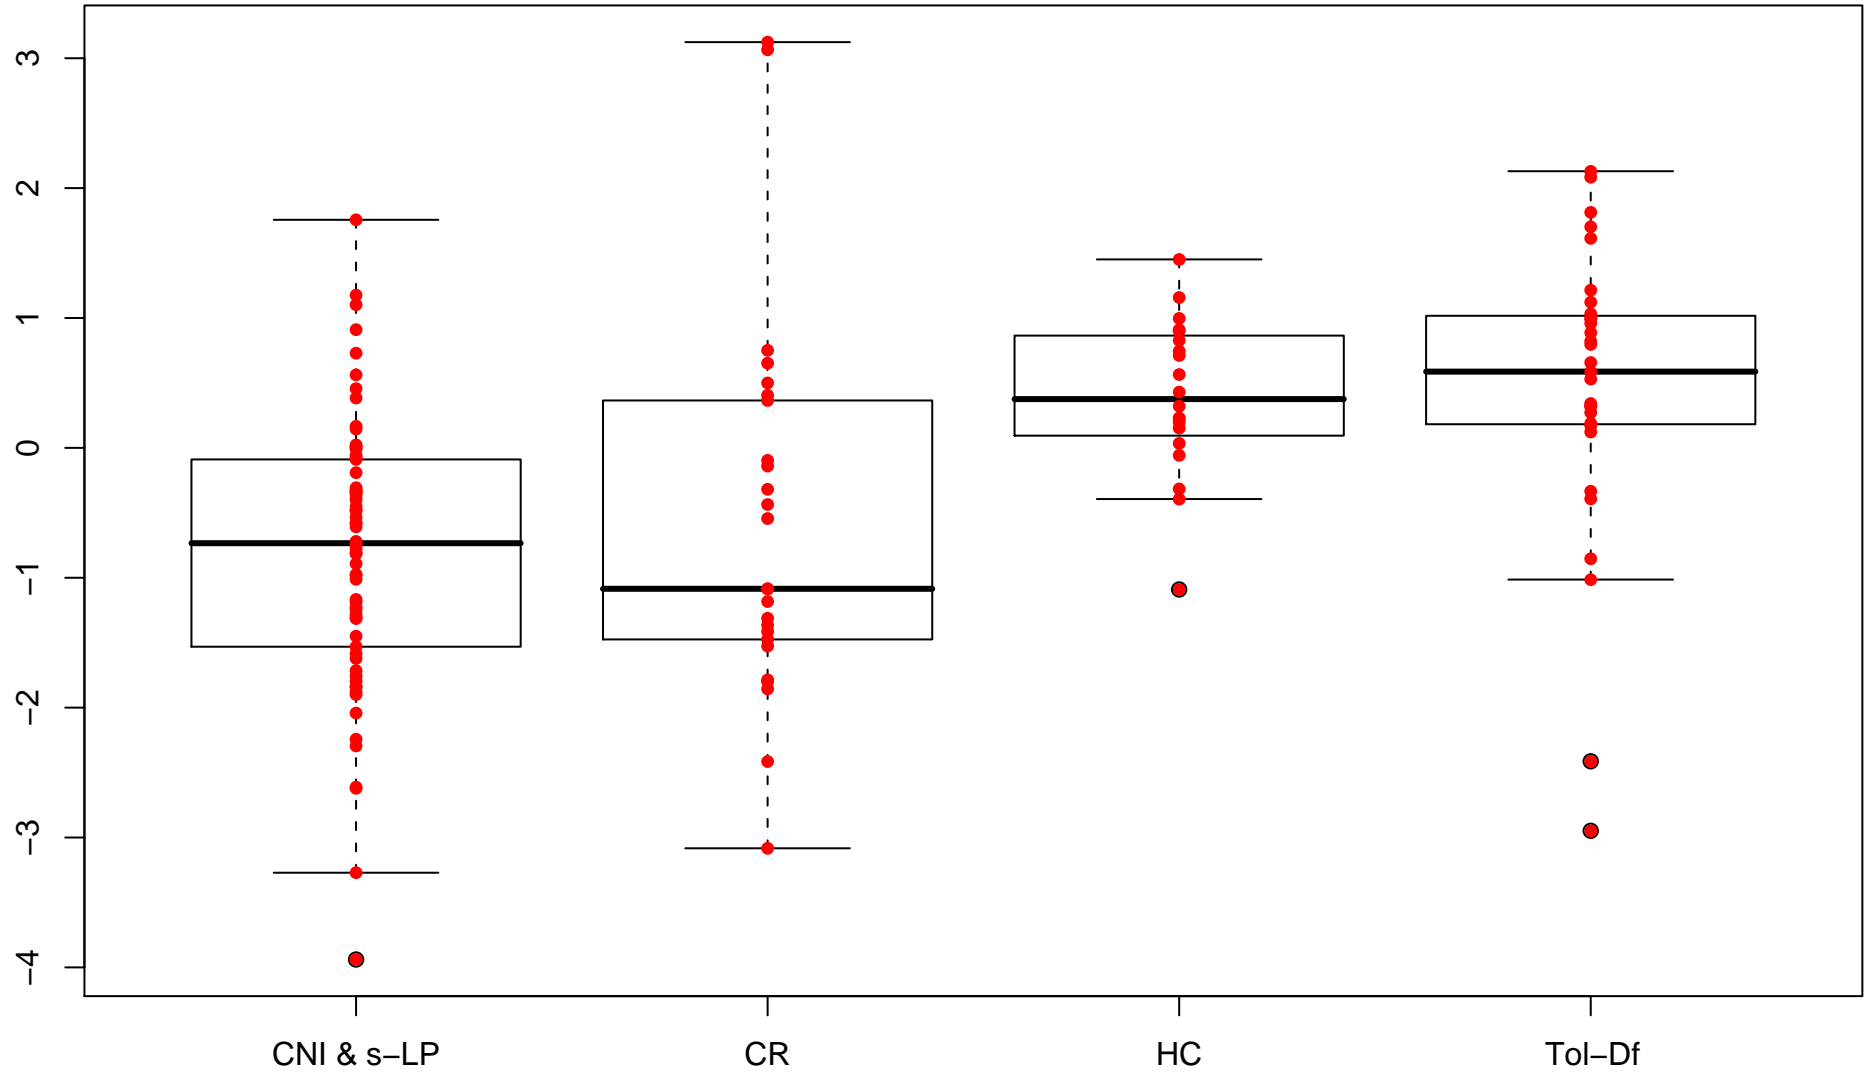

Rank 30 : OCIAD2  
1.1973e-08

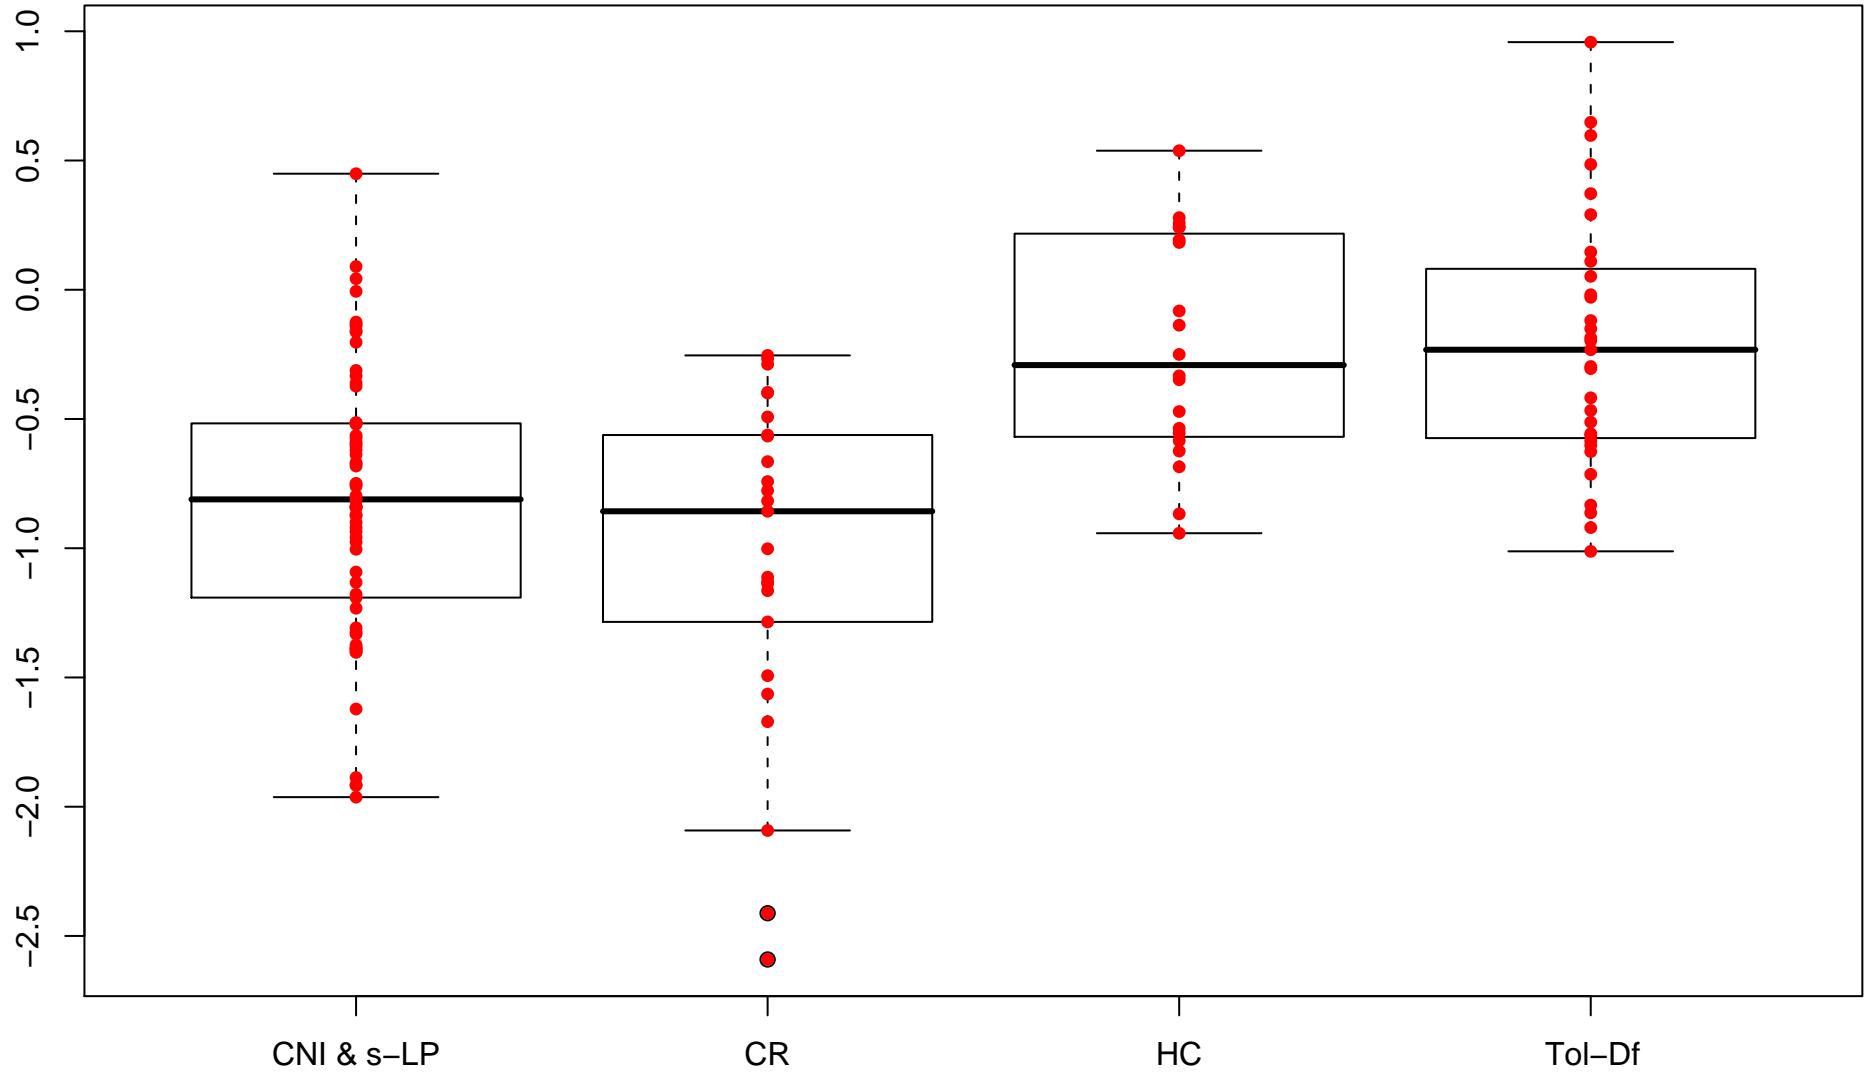

Rank 31 : FHIT  
1.3494e-08

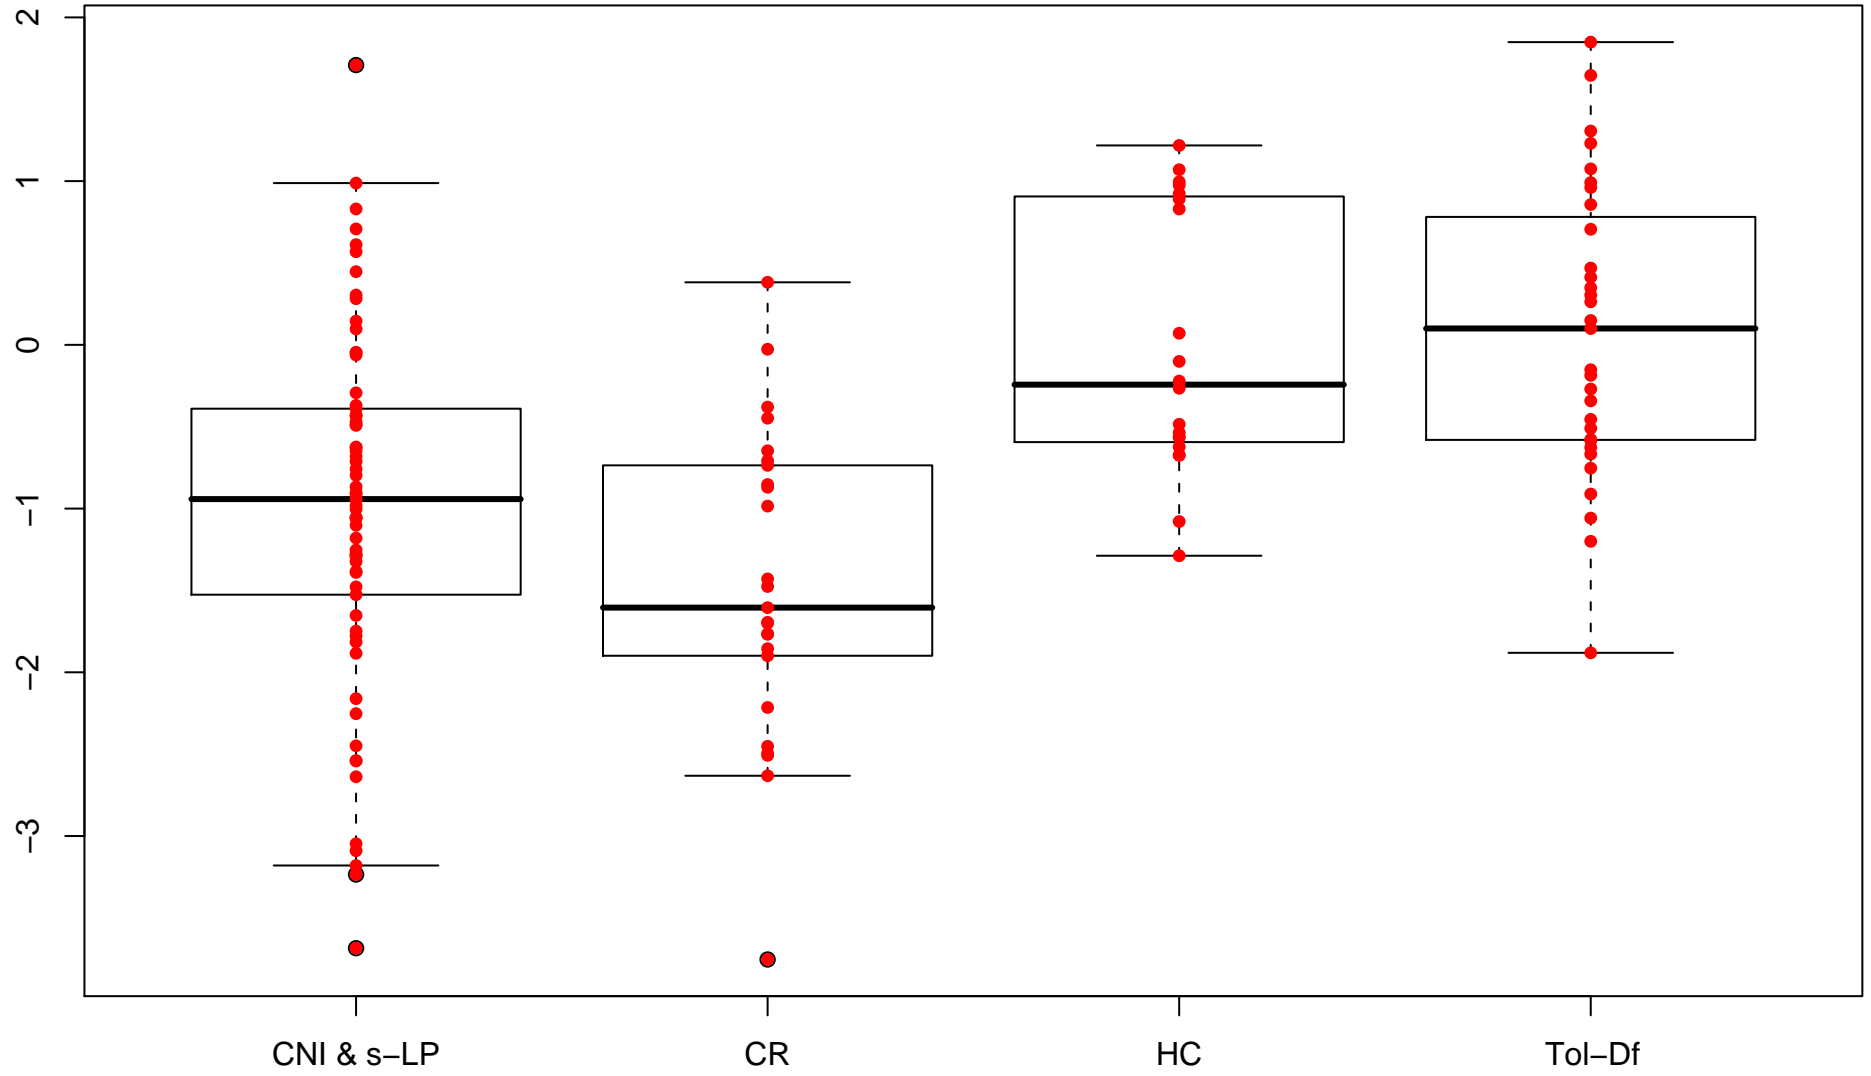



Rank 32 : ENST00000359488  
1.4266e-08

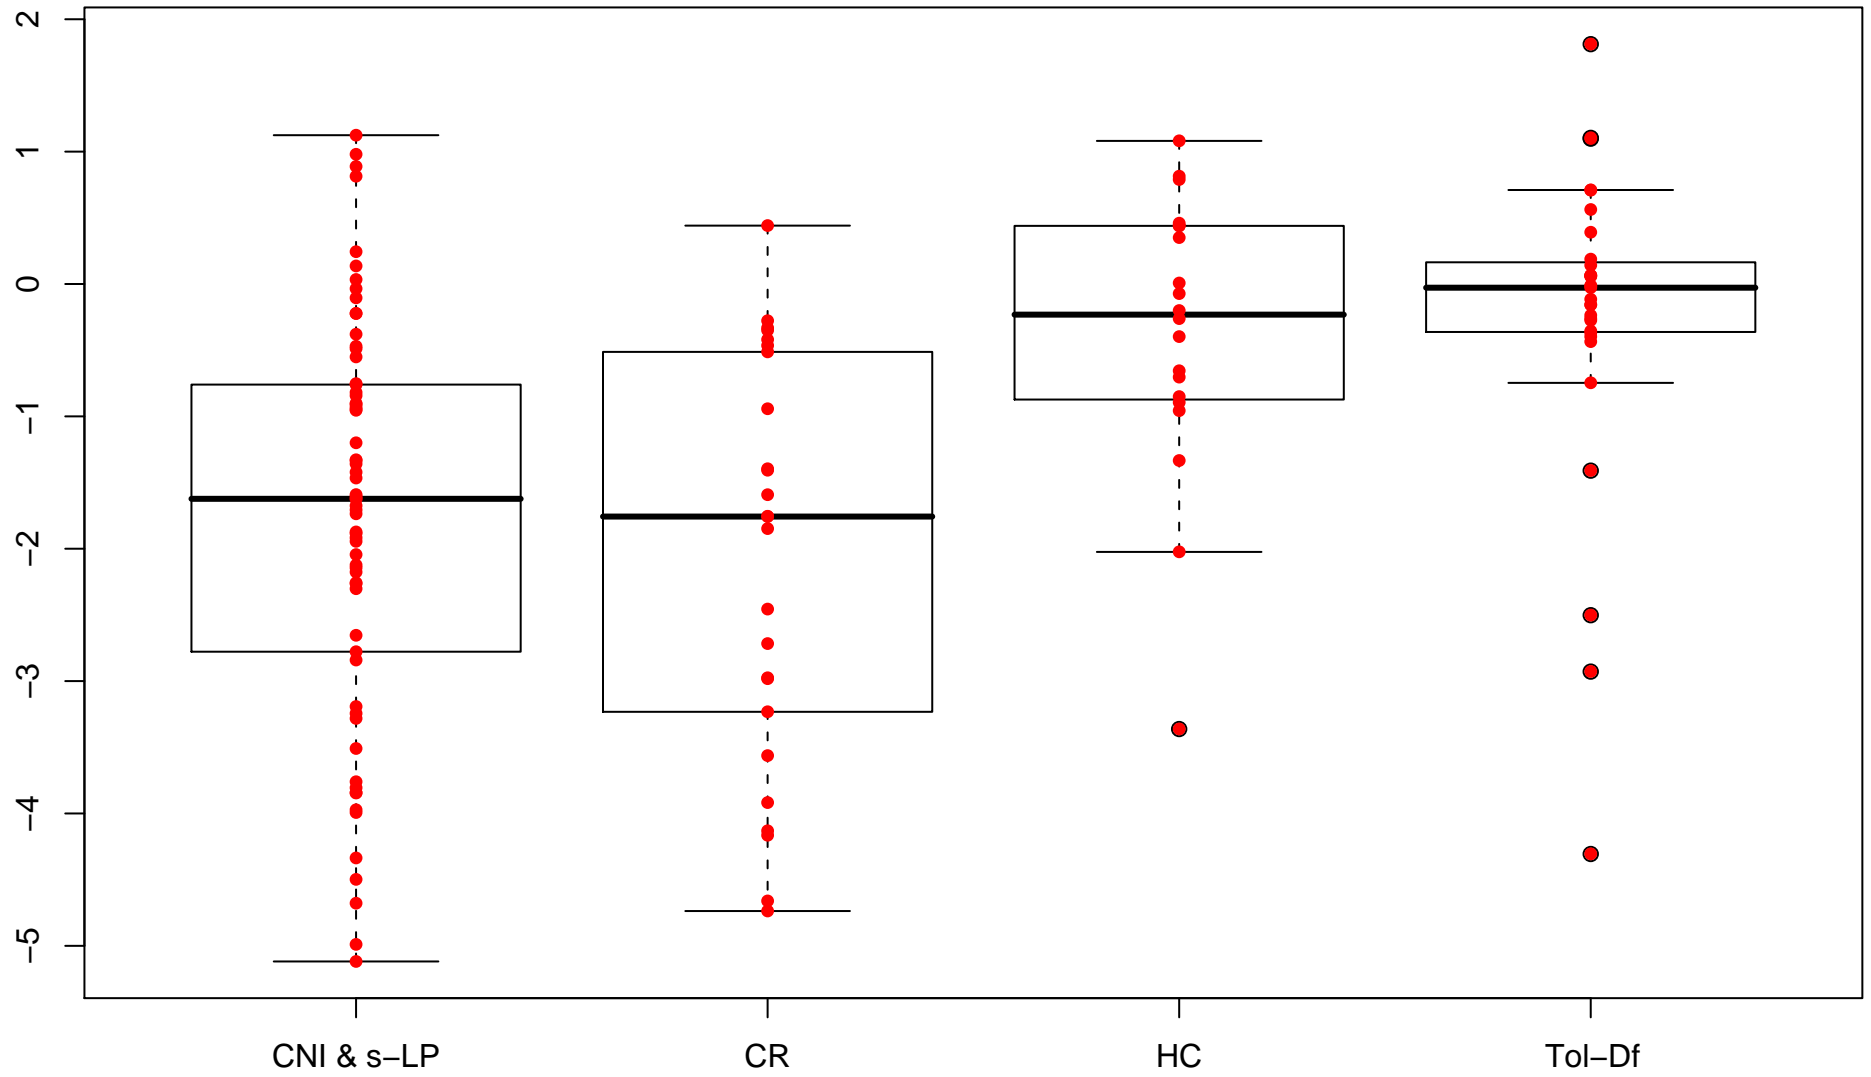

Rank 33 : IRF8  
1.4928e-08

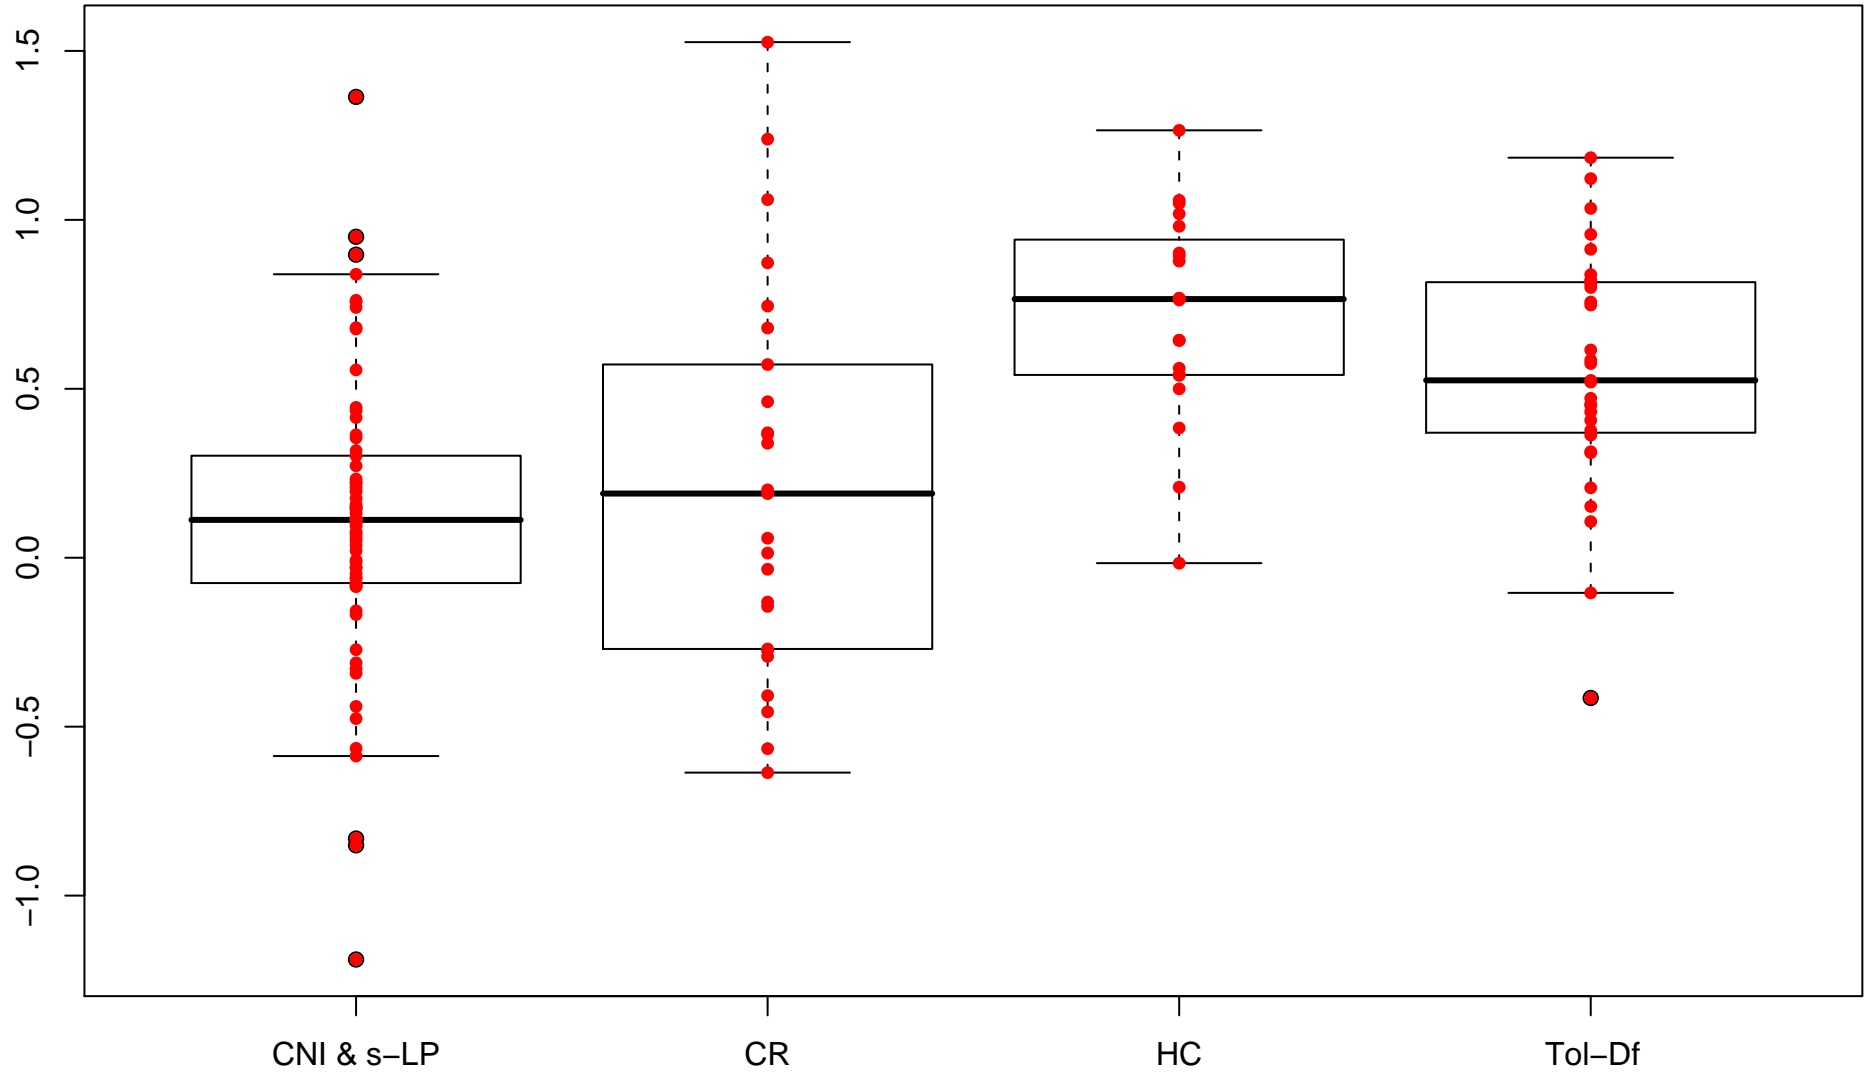

Rank 34 : ENST00000360623  
2.1058e-08

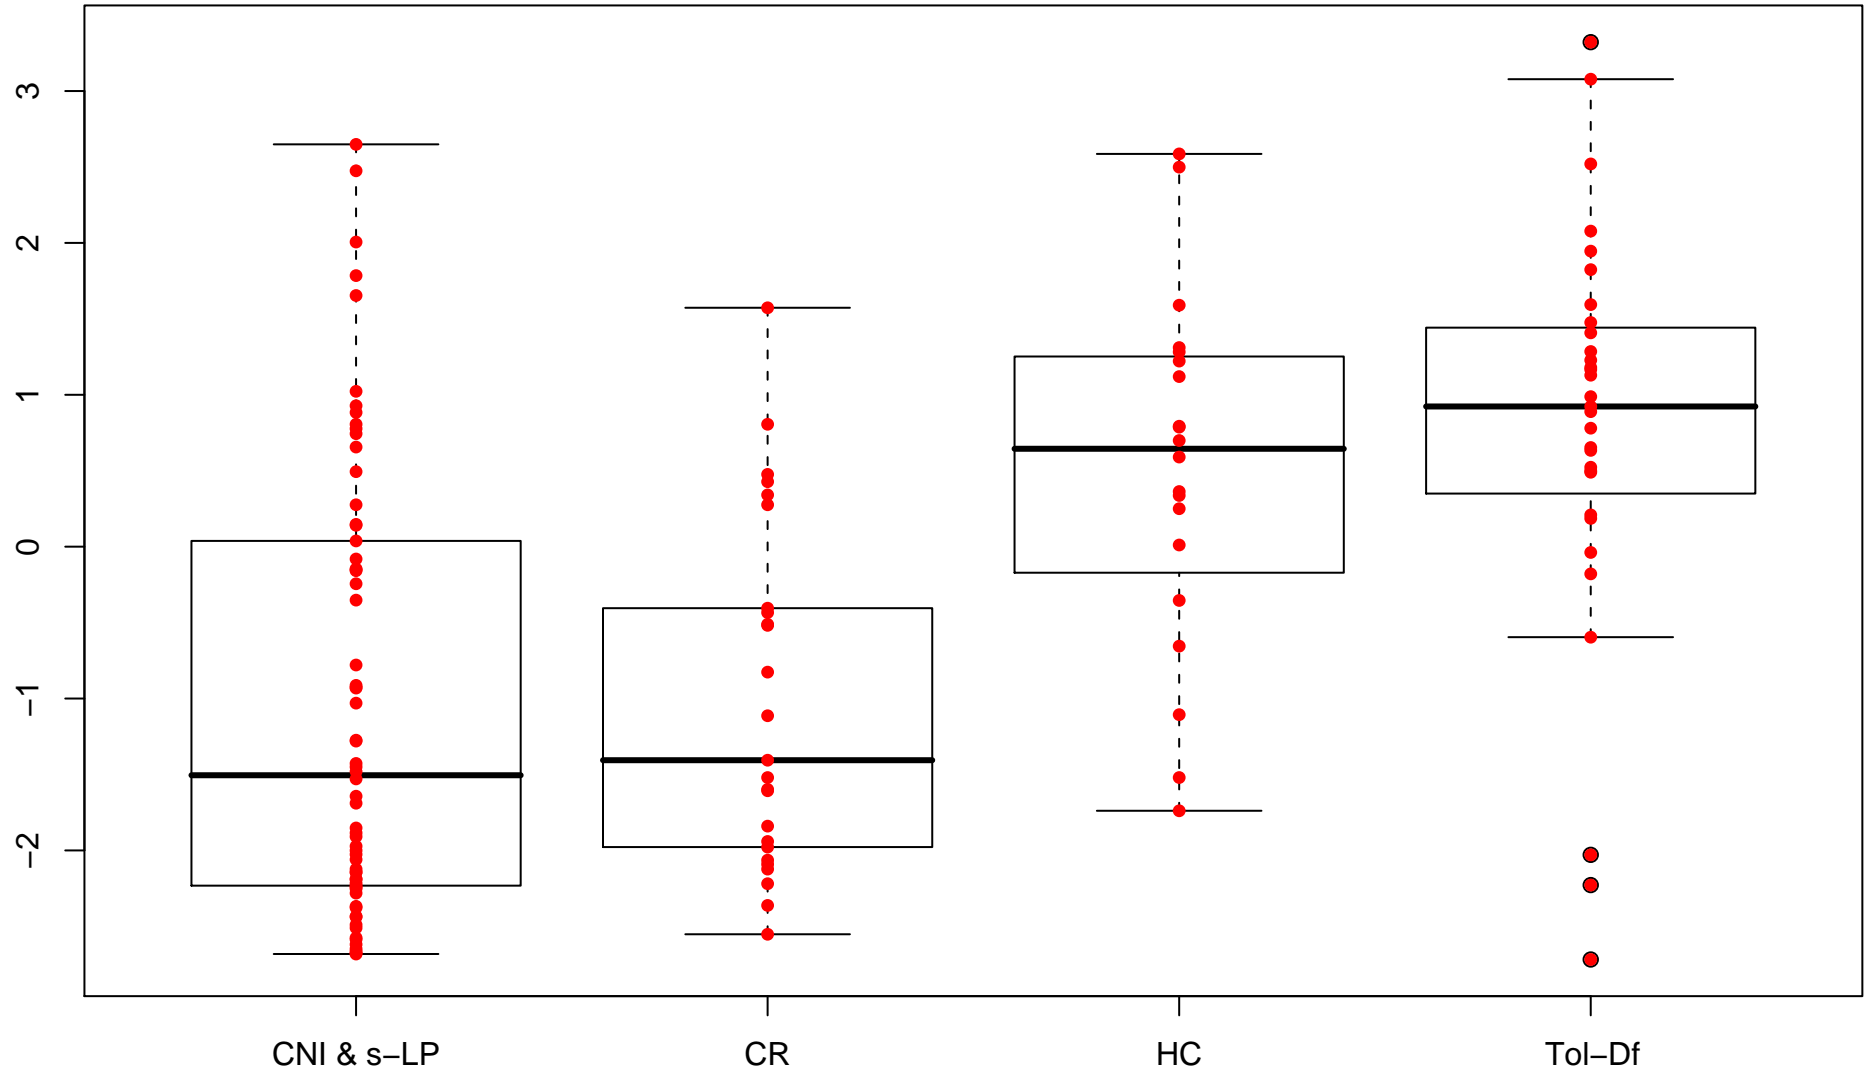

Rank 35 : RPS6  
2.2906e-08

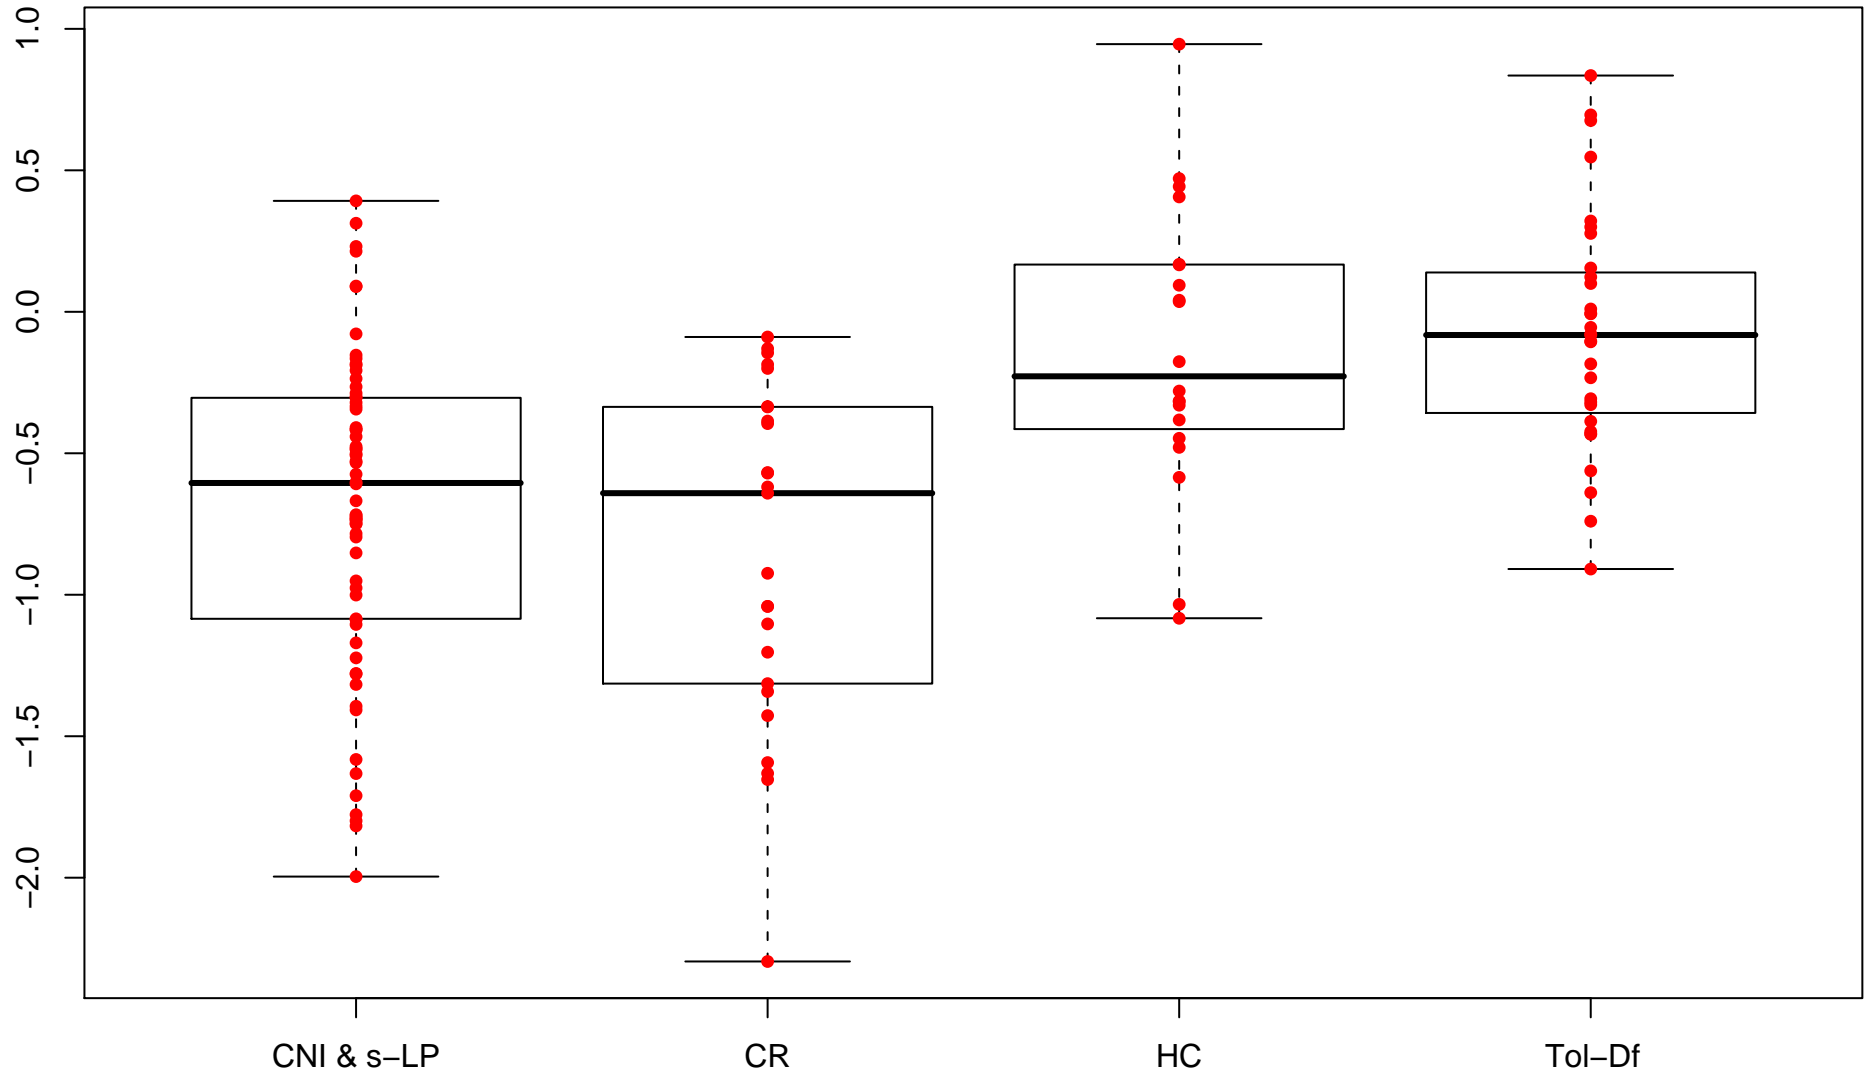

Rank 36 : SORT1  
2.3354e-08

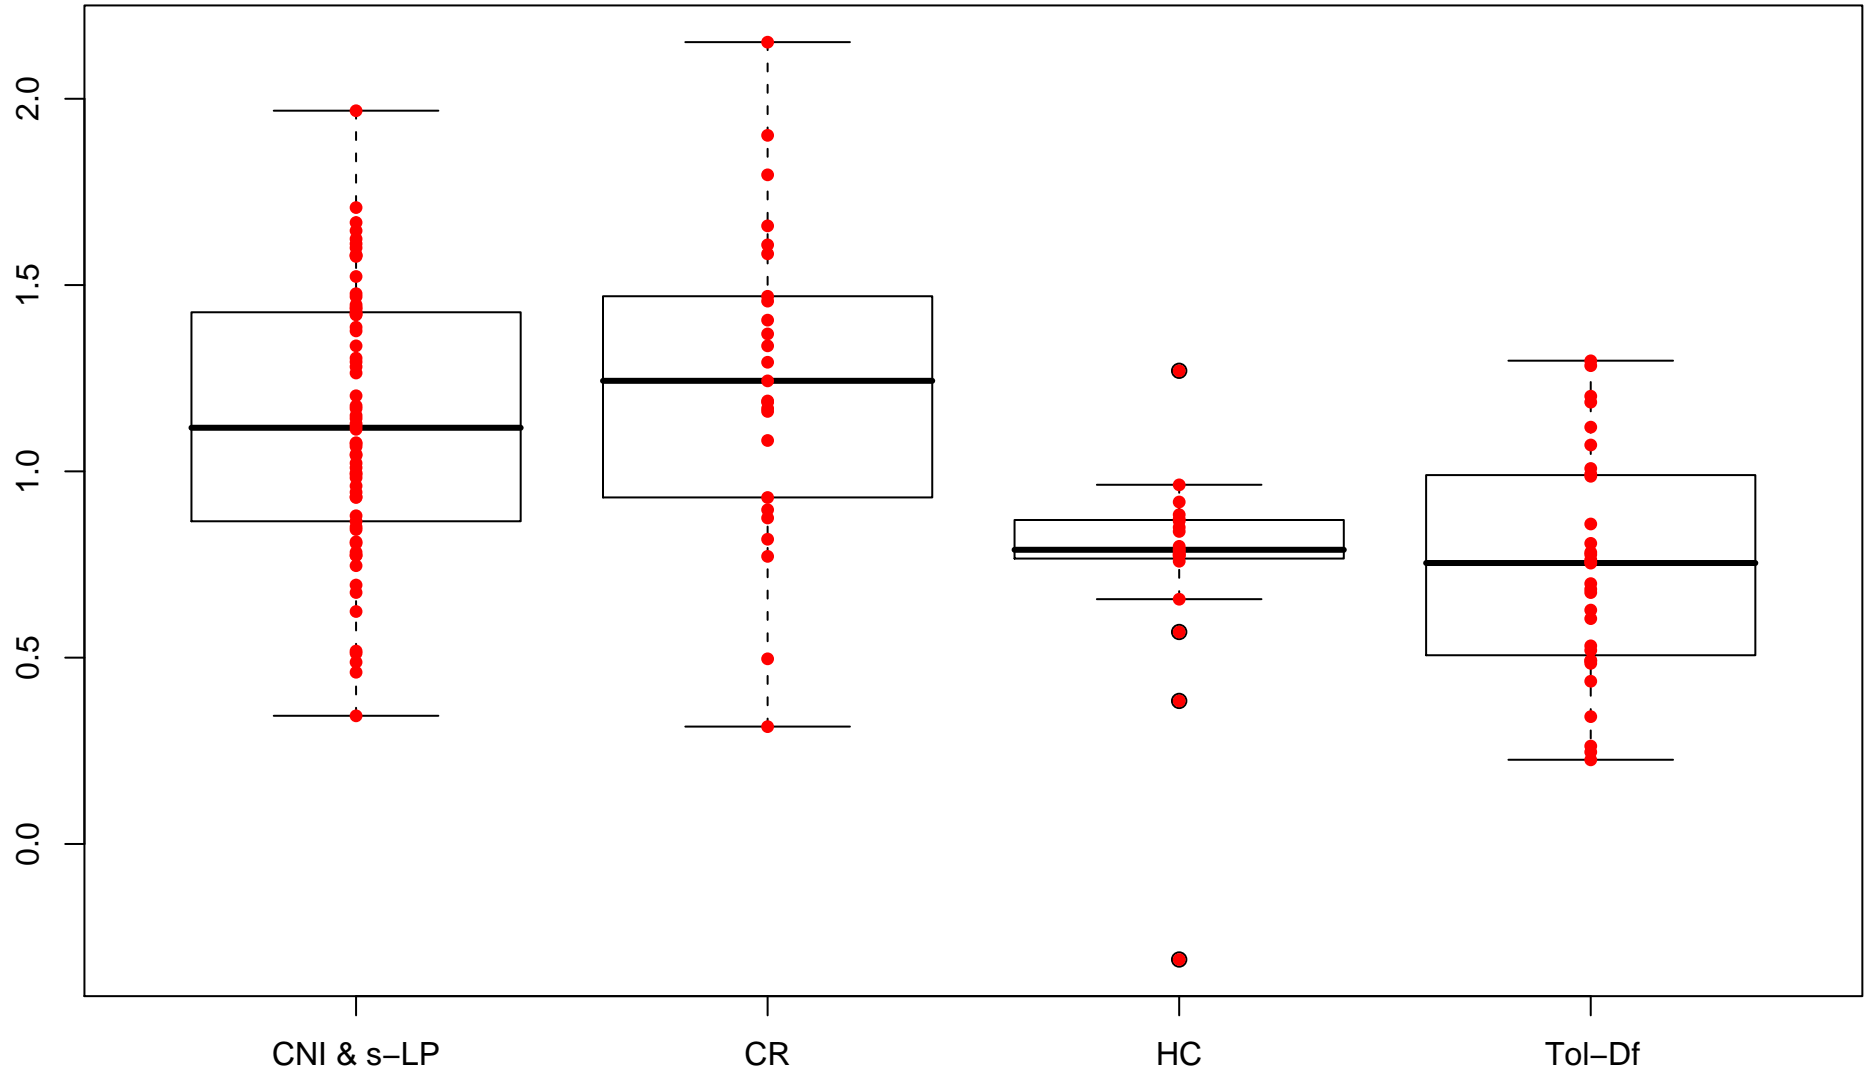

Rank 37 : KIAA0485  
2.4445e-08

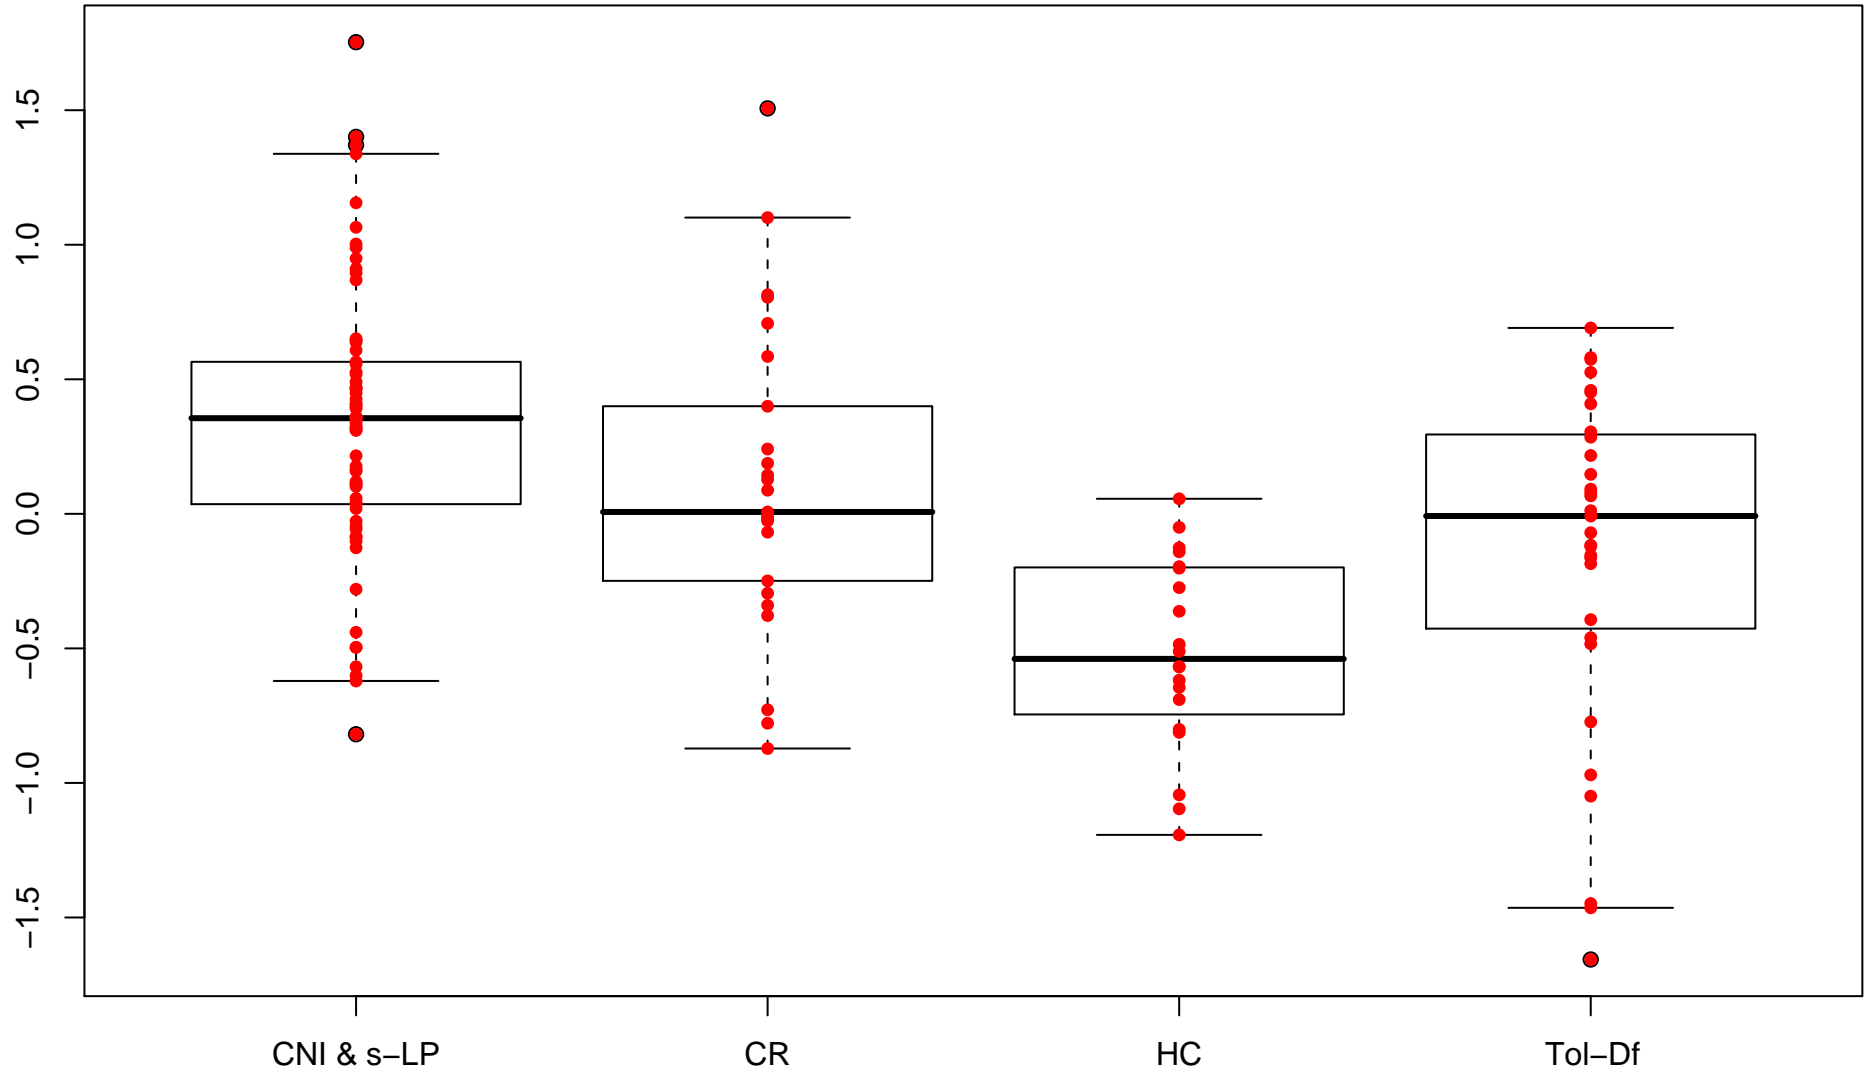

Rank 38 : ASB2  
2.4669e-08

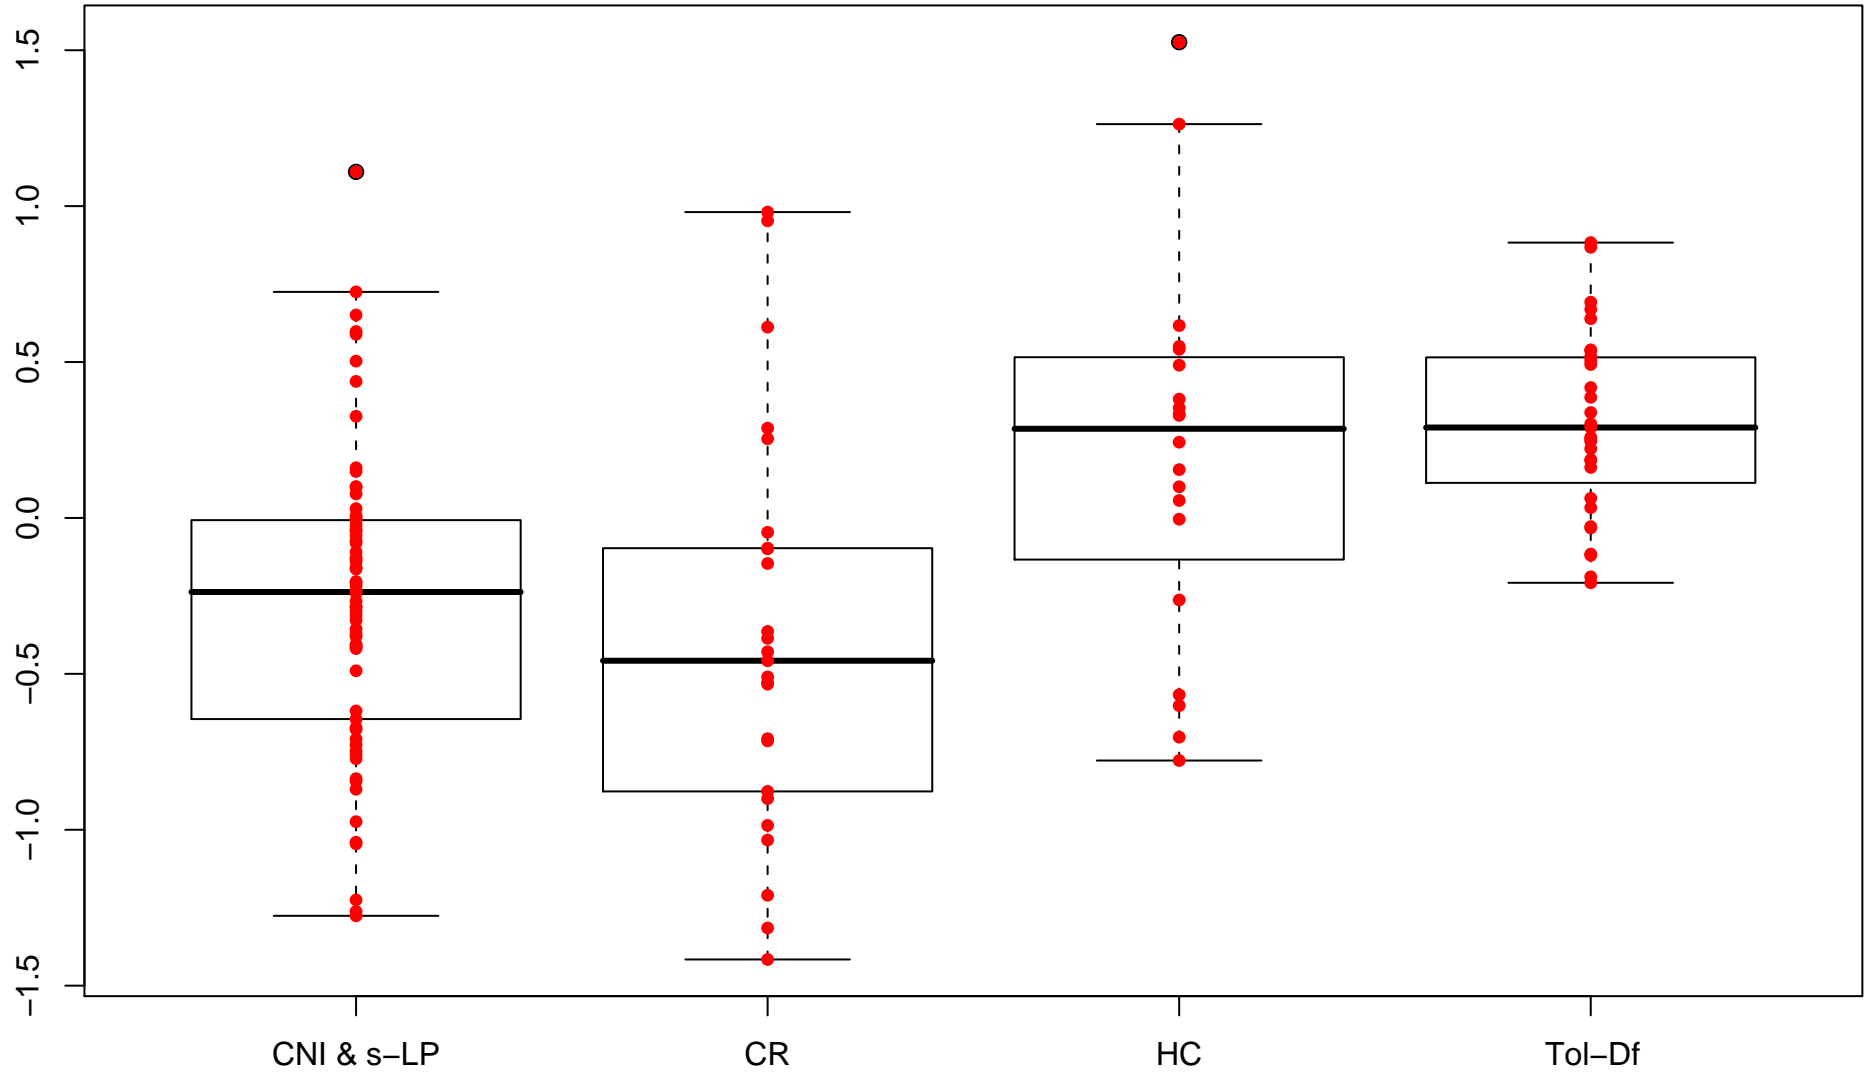

Rank 39 : RPL9  
2.4729e-08

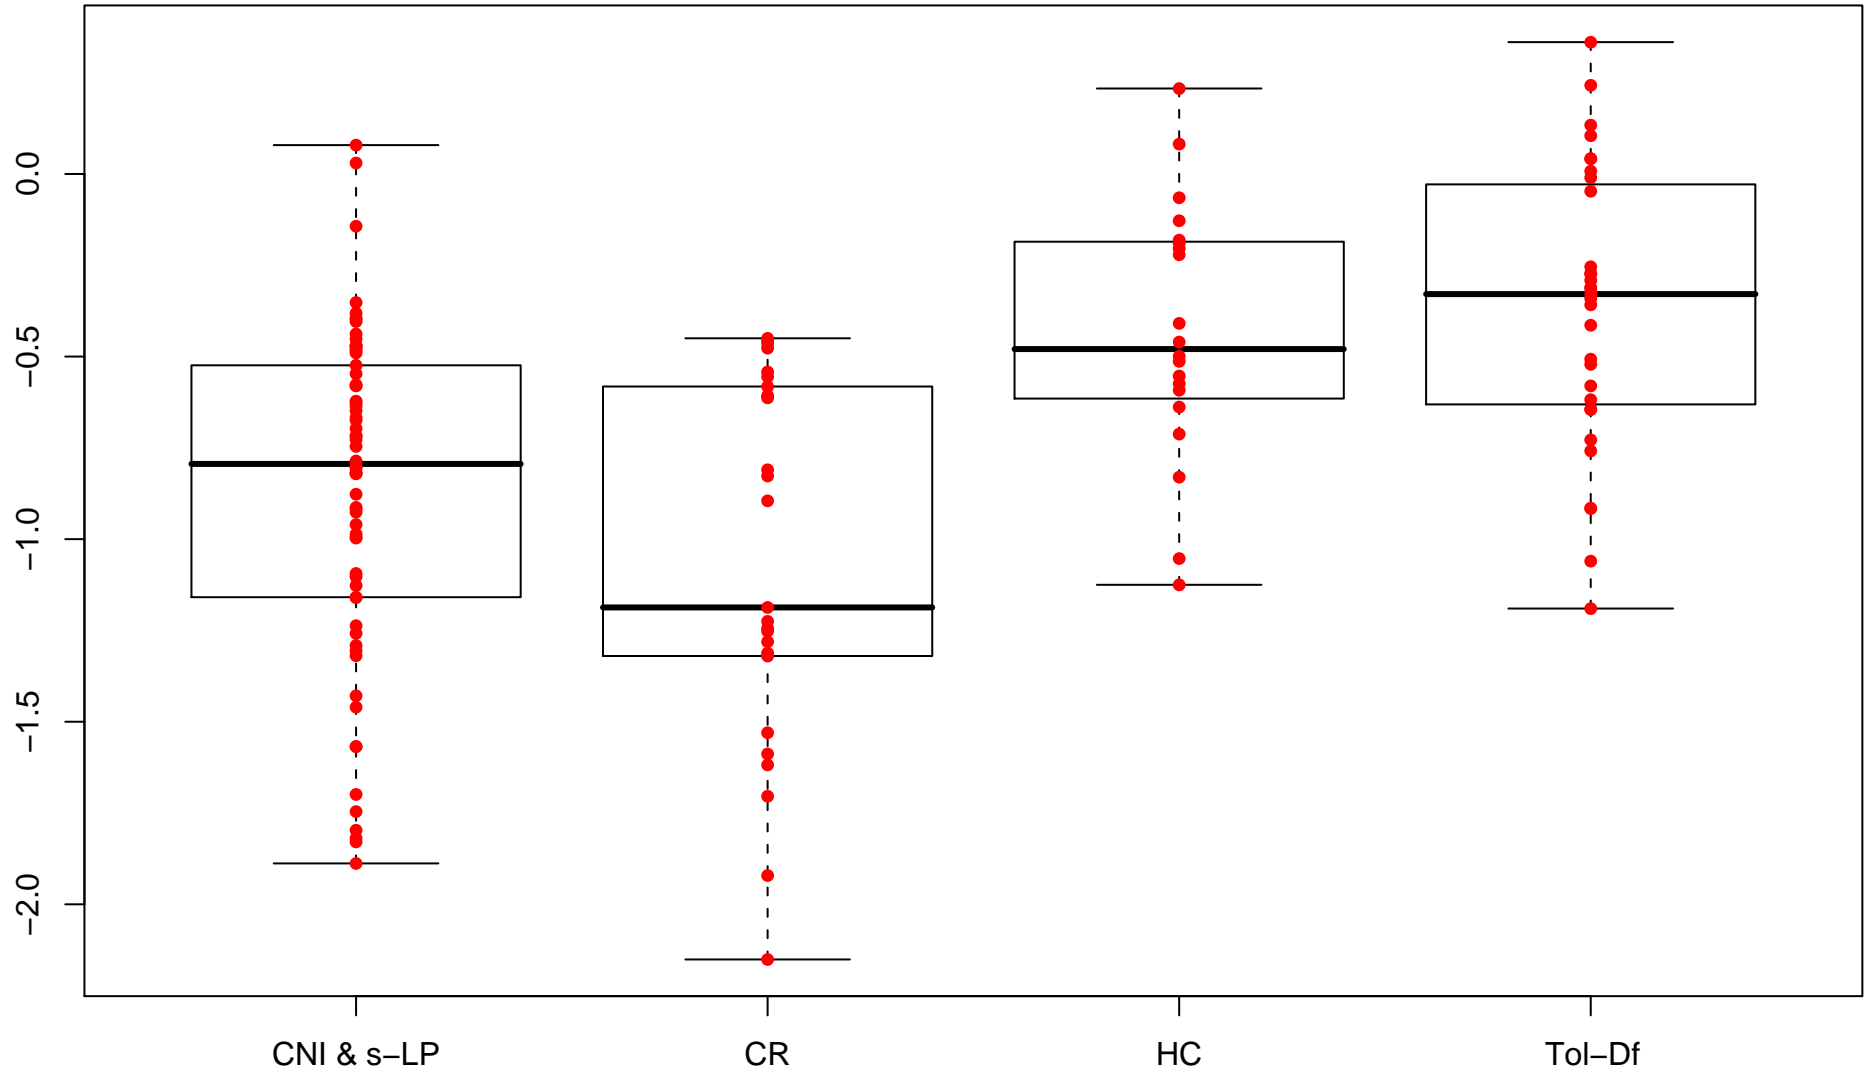



Rank 40 : BBS4  
2.5037e-08

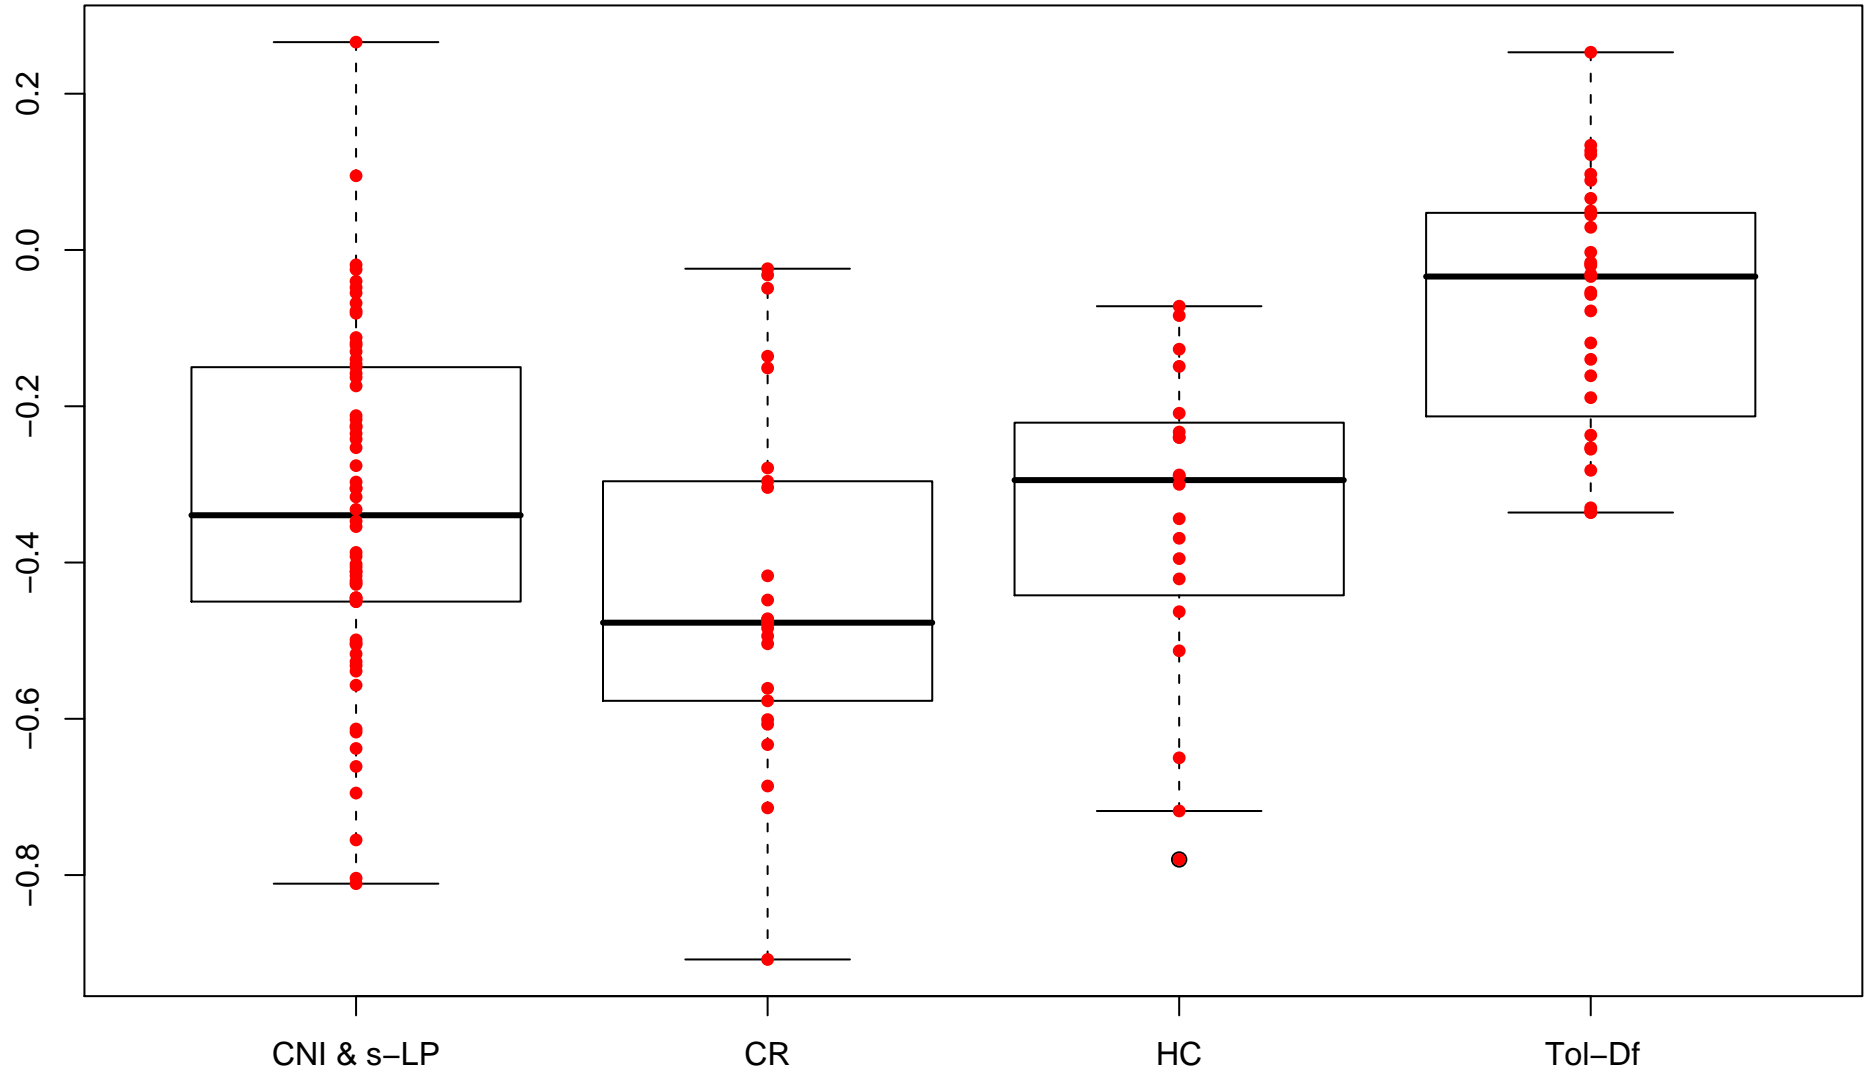

Rank 41 : EIF2AK3  
2.5599e-08

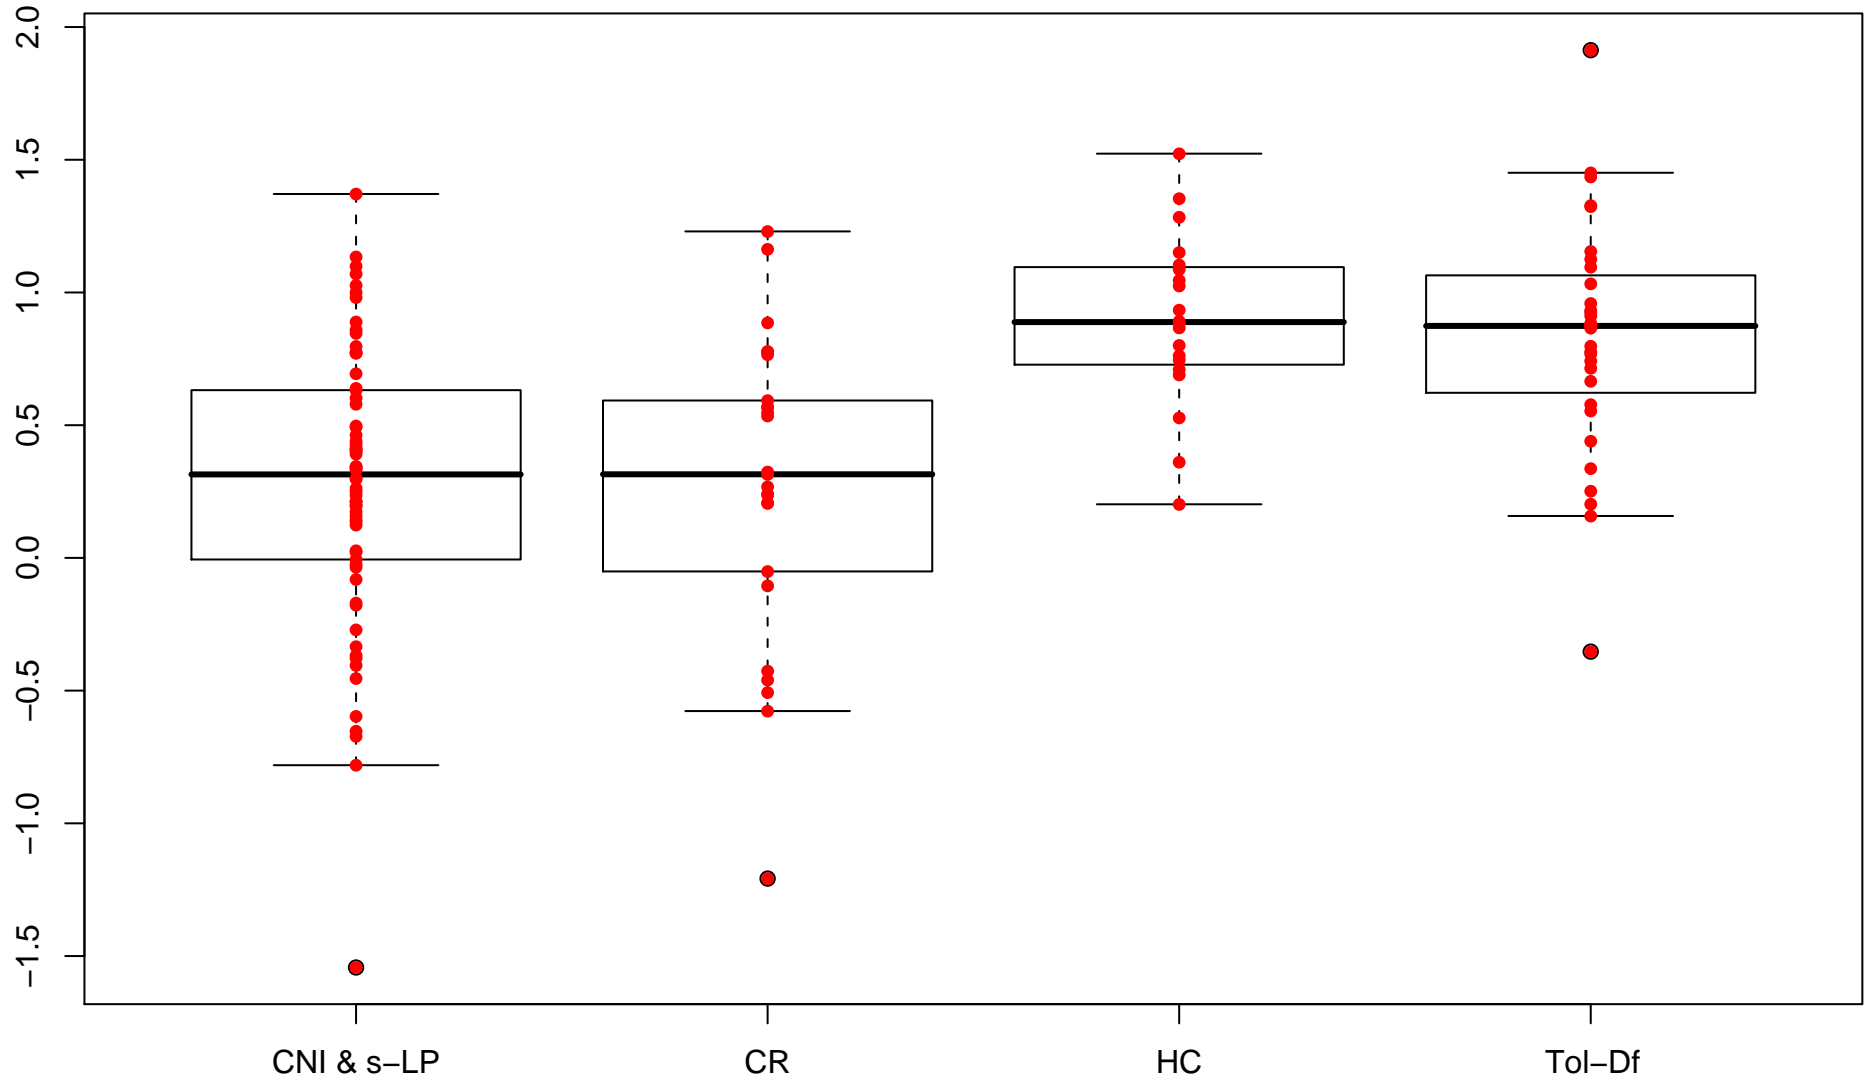

Rank 42 : CD48  
2.8923e-08

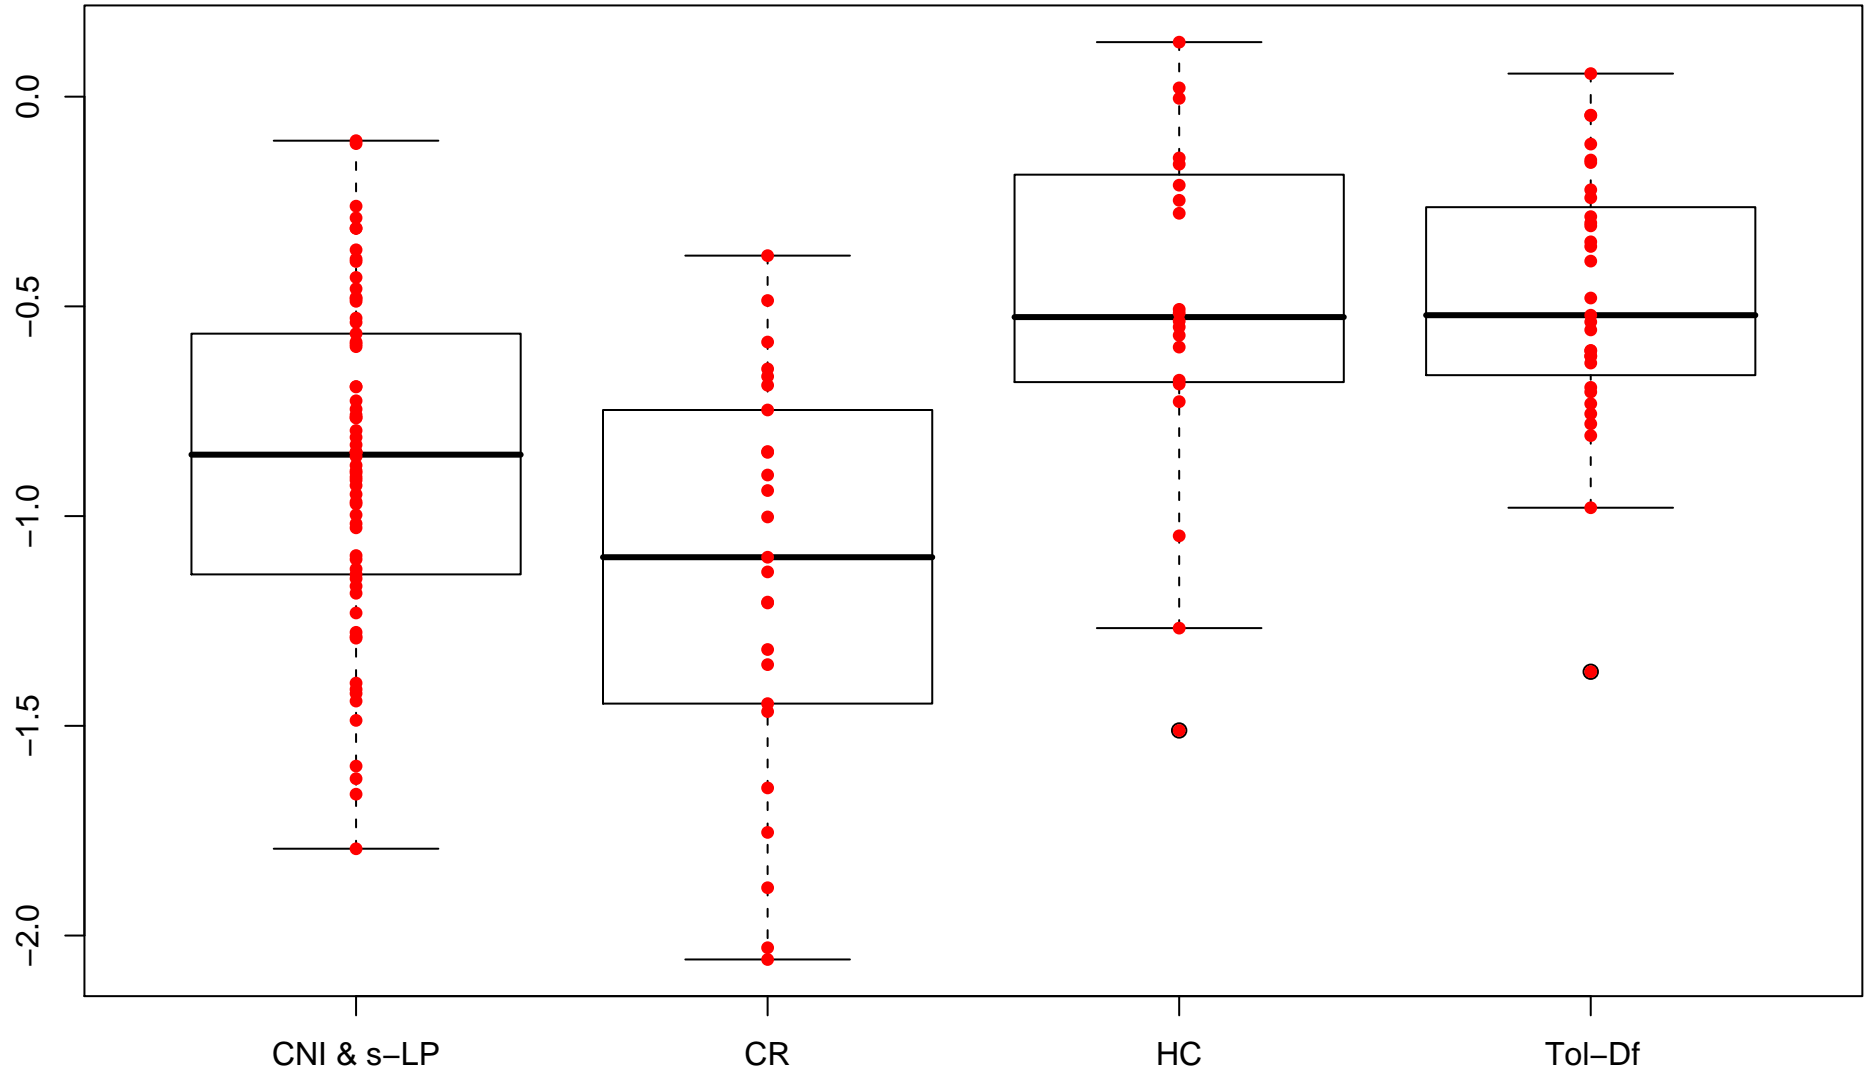

Rank 43 : FCRL2  
3.0755e-08

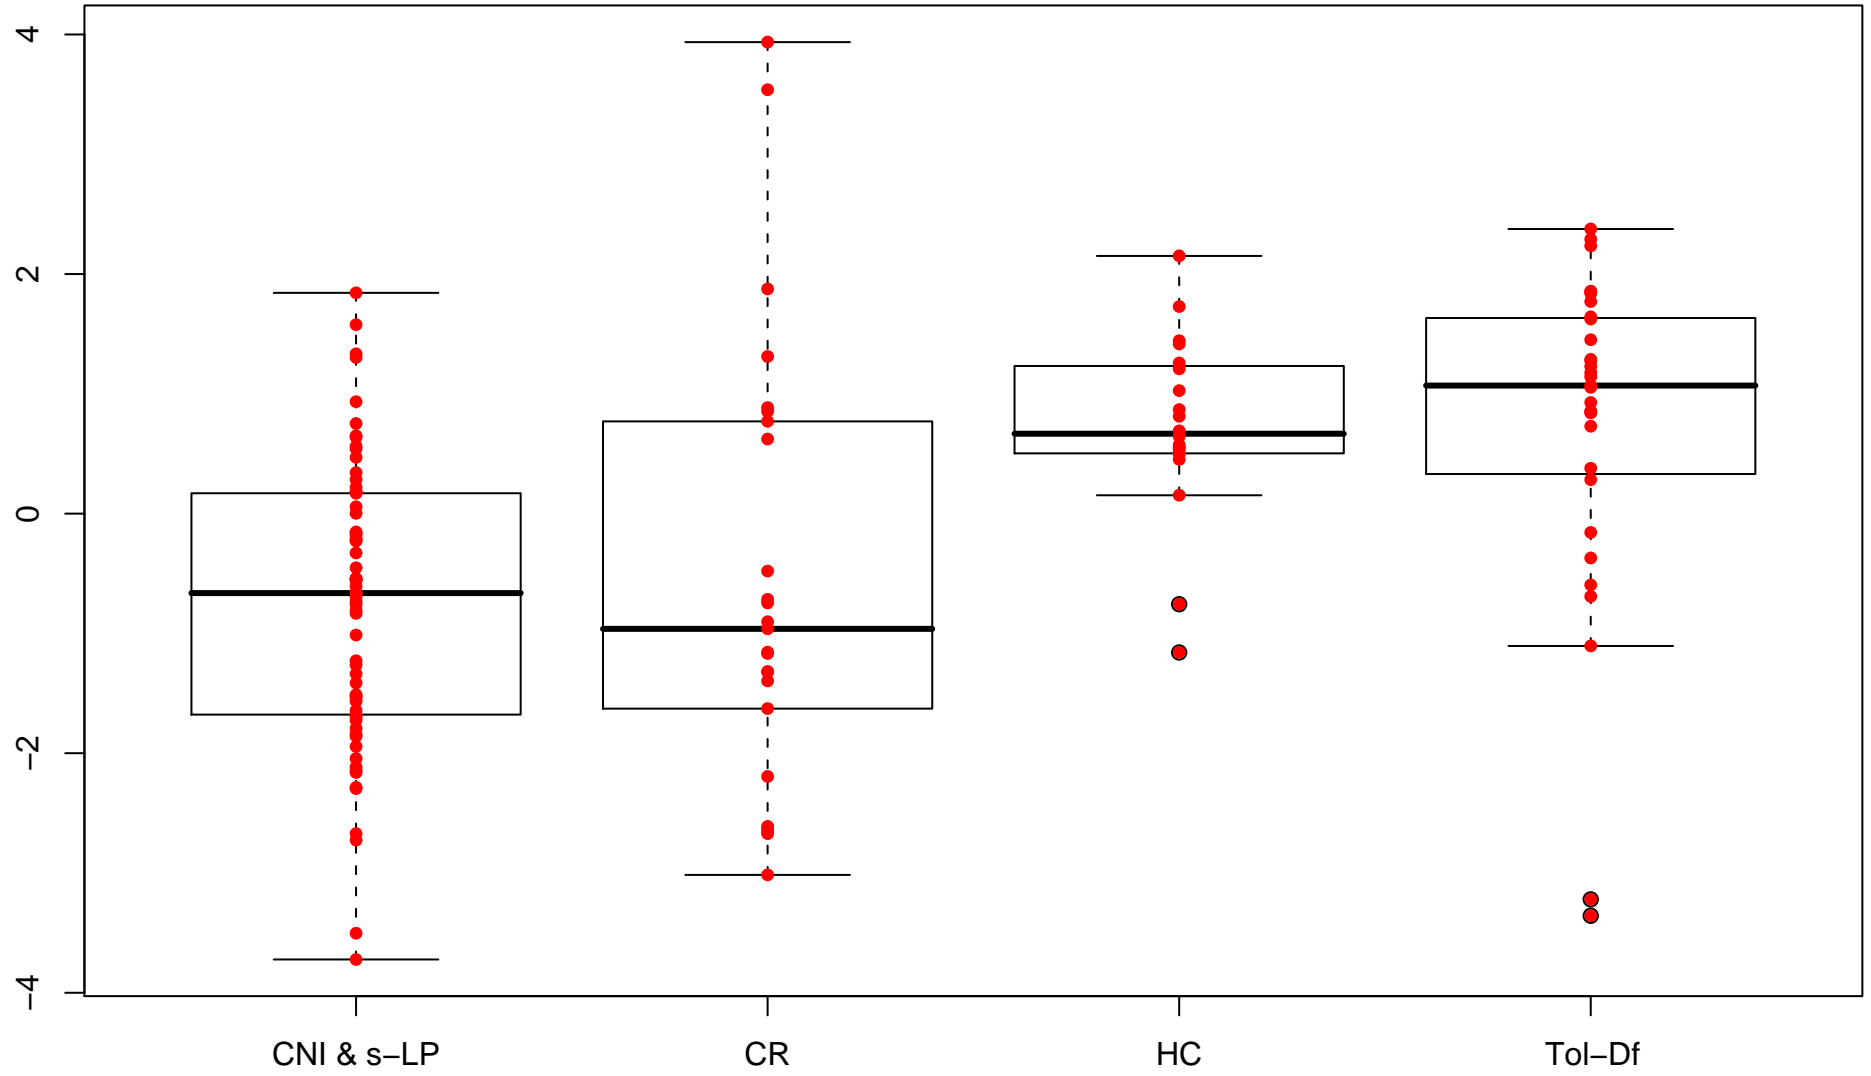

Rank 44 : DENND2D  
3.0983e-08

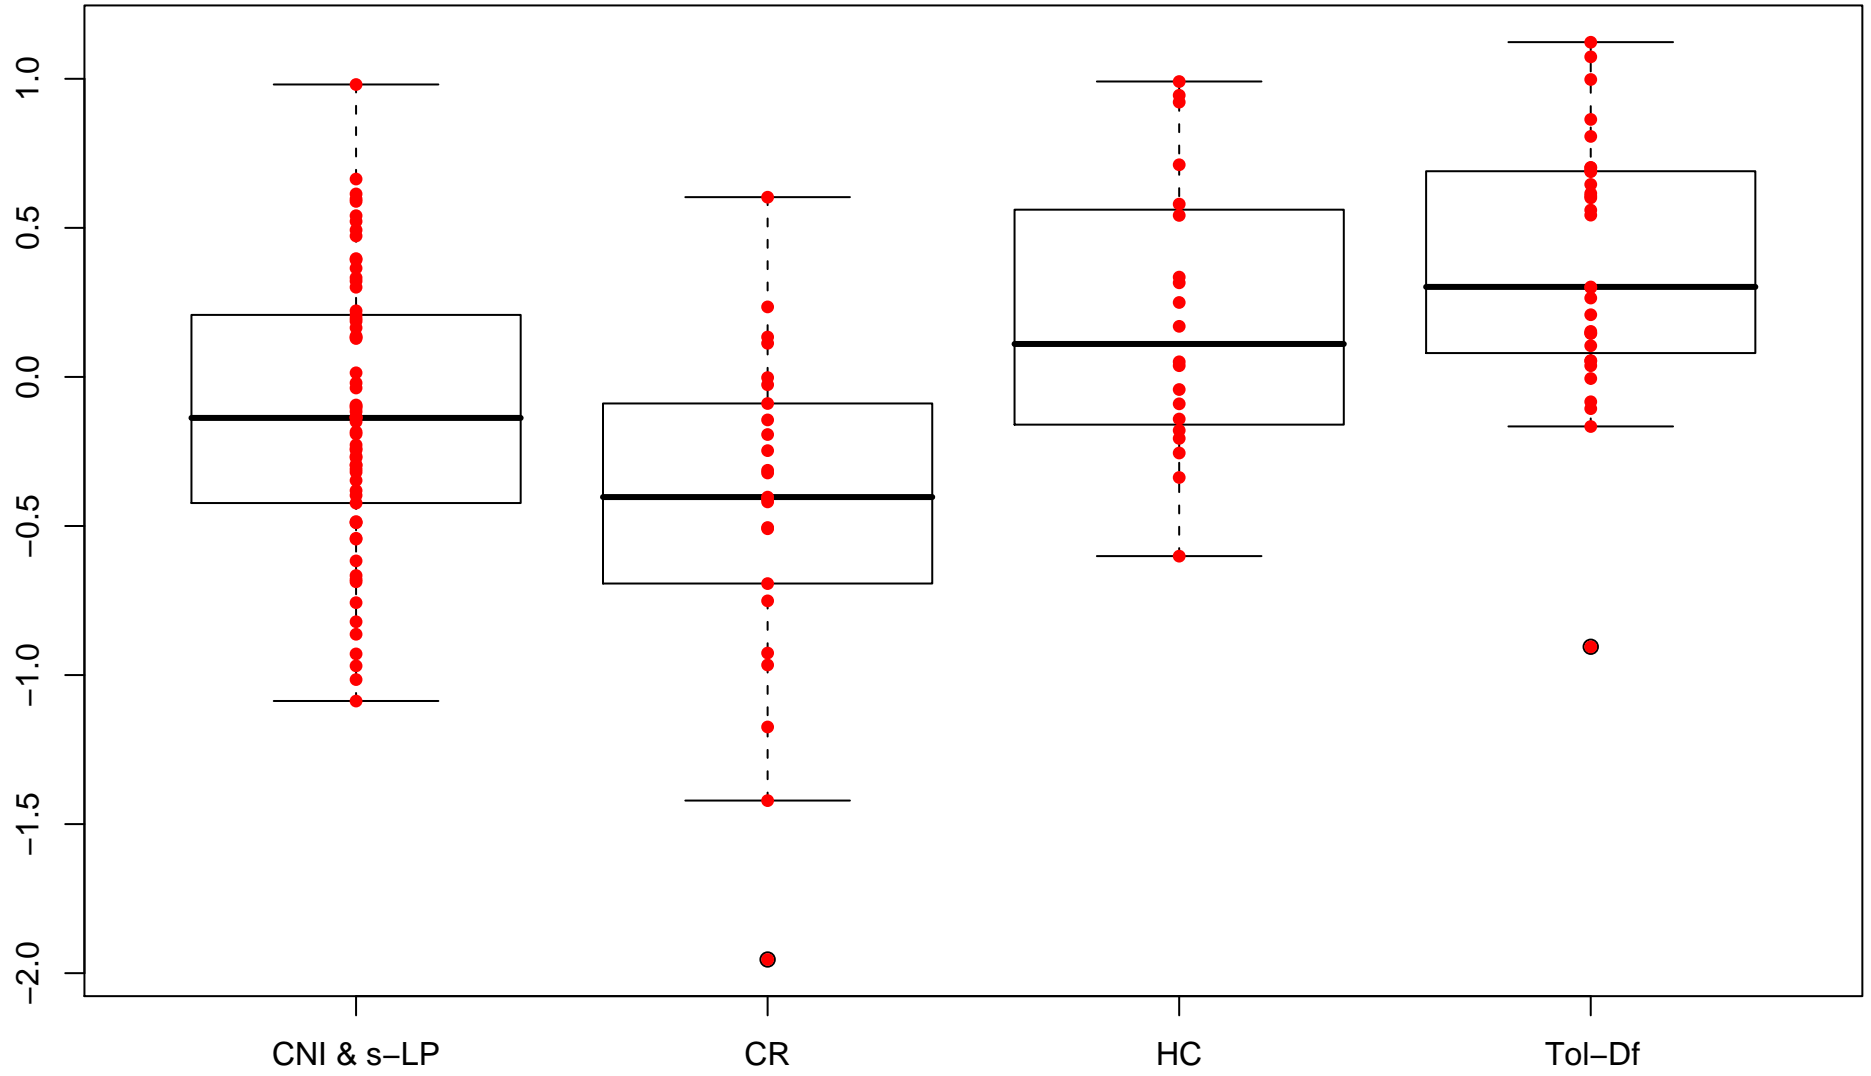

Rank 45 : IGLL3  
3.423e-08

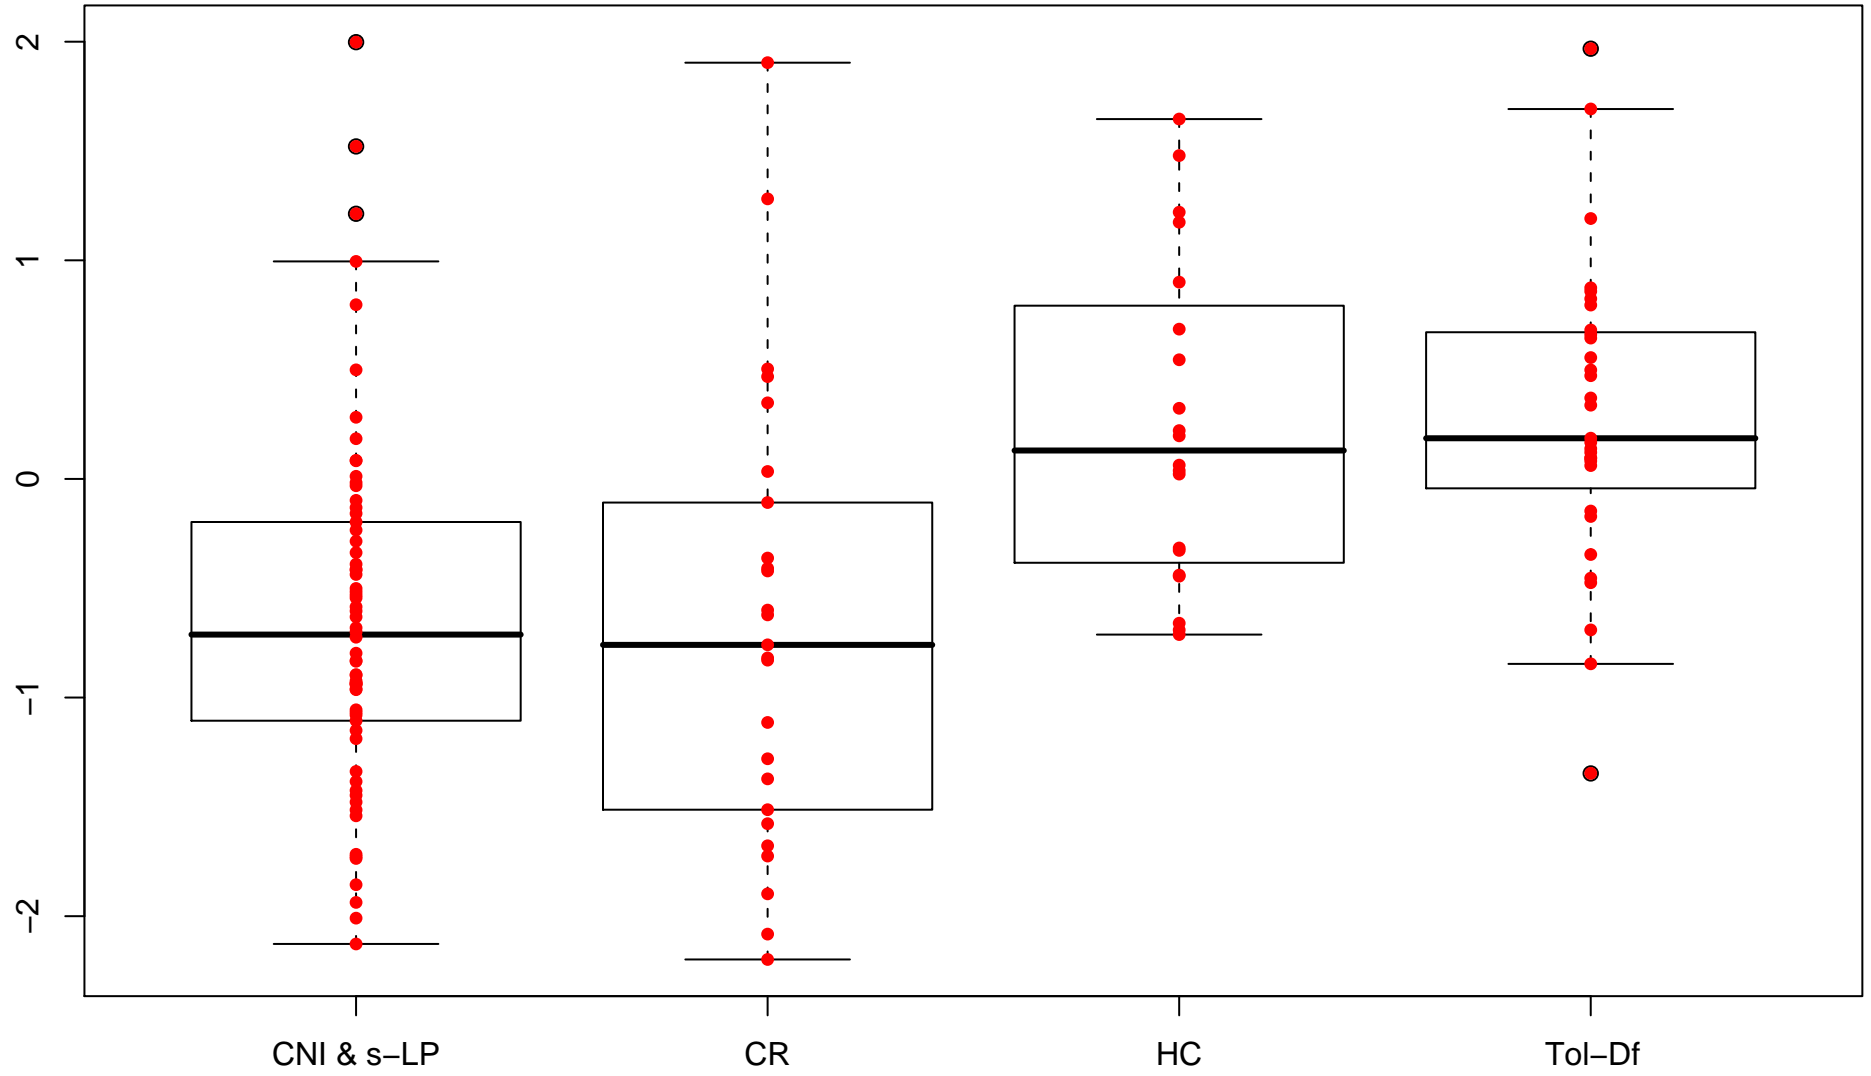

Rank 46 : PMP22  
3.844e-08

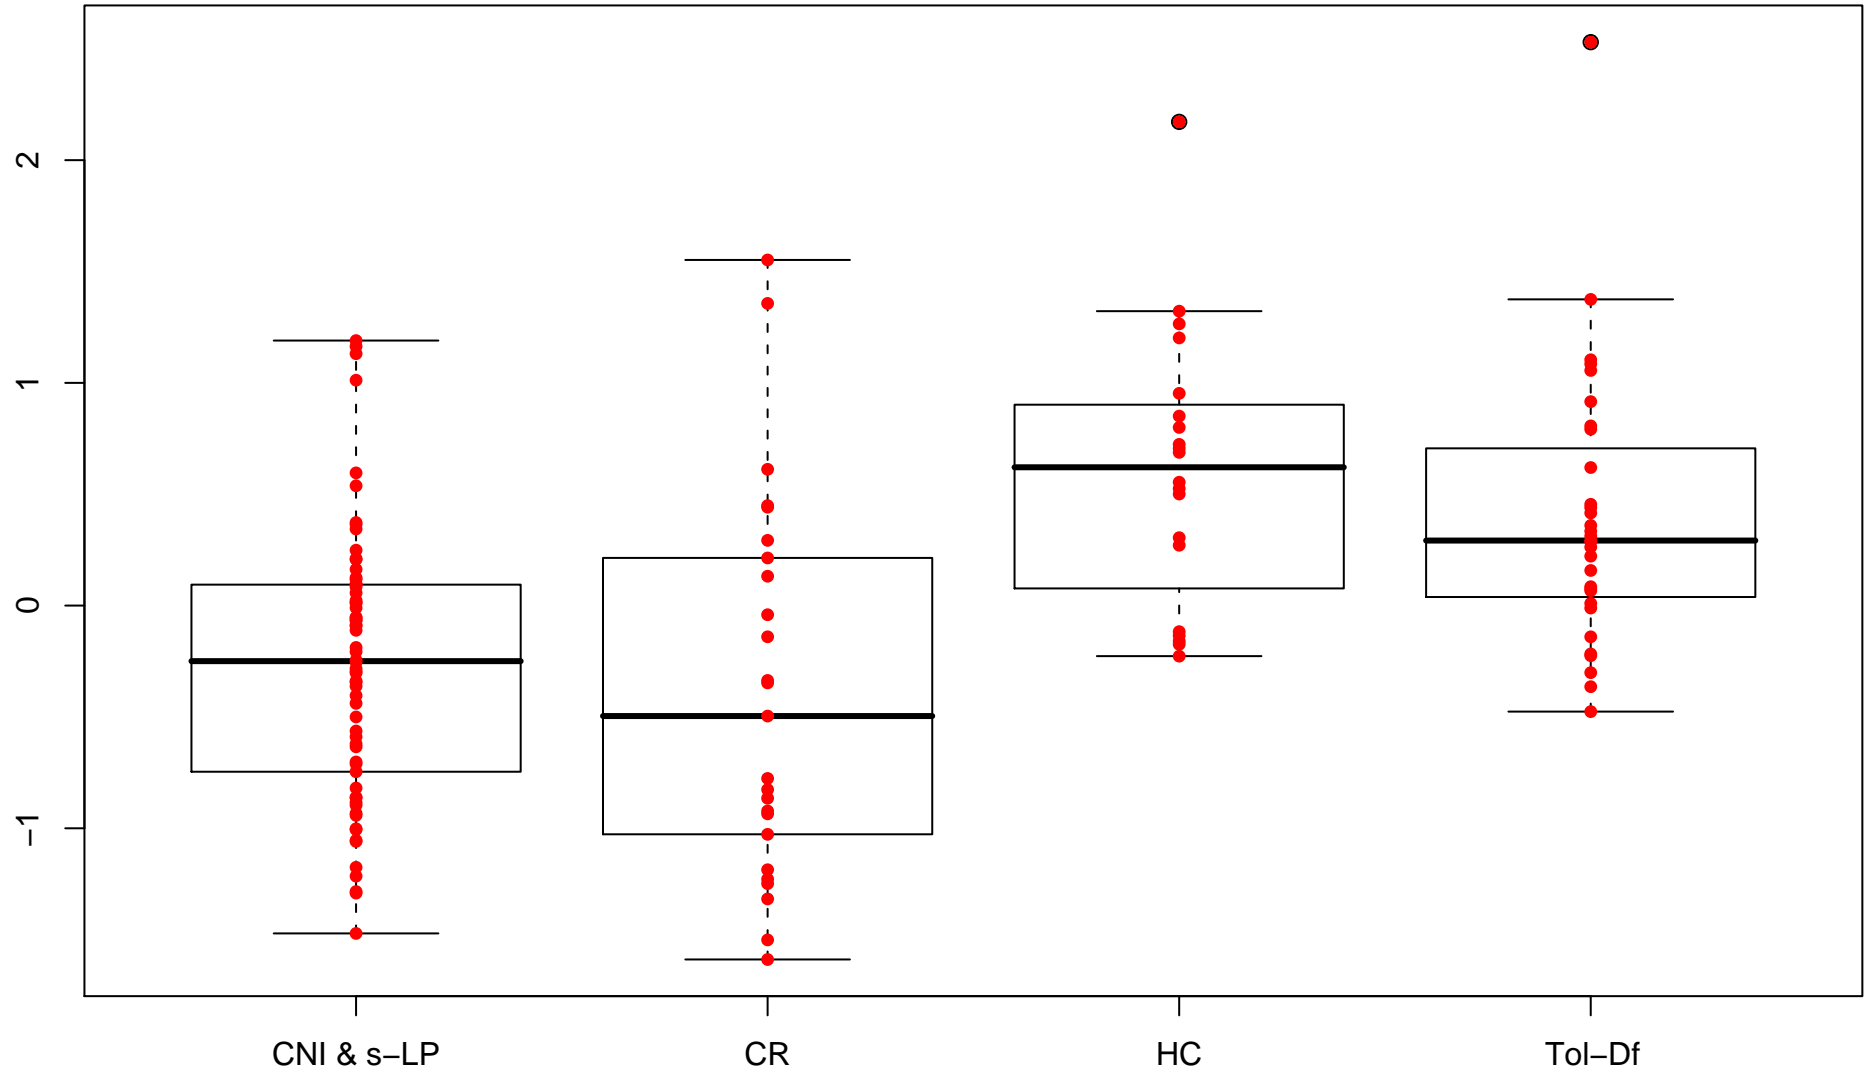

Rank 47 : HINT1  
4.206e-08

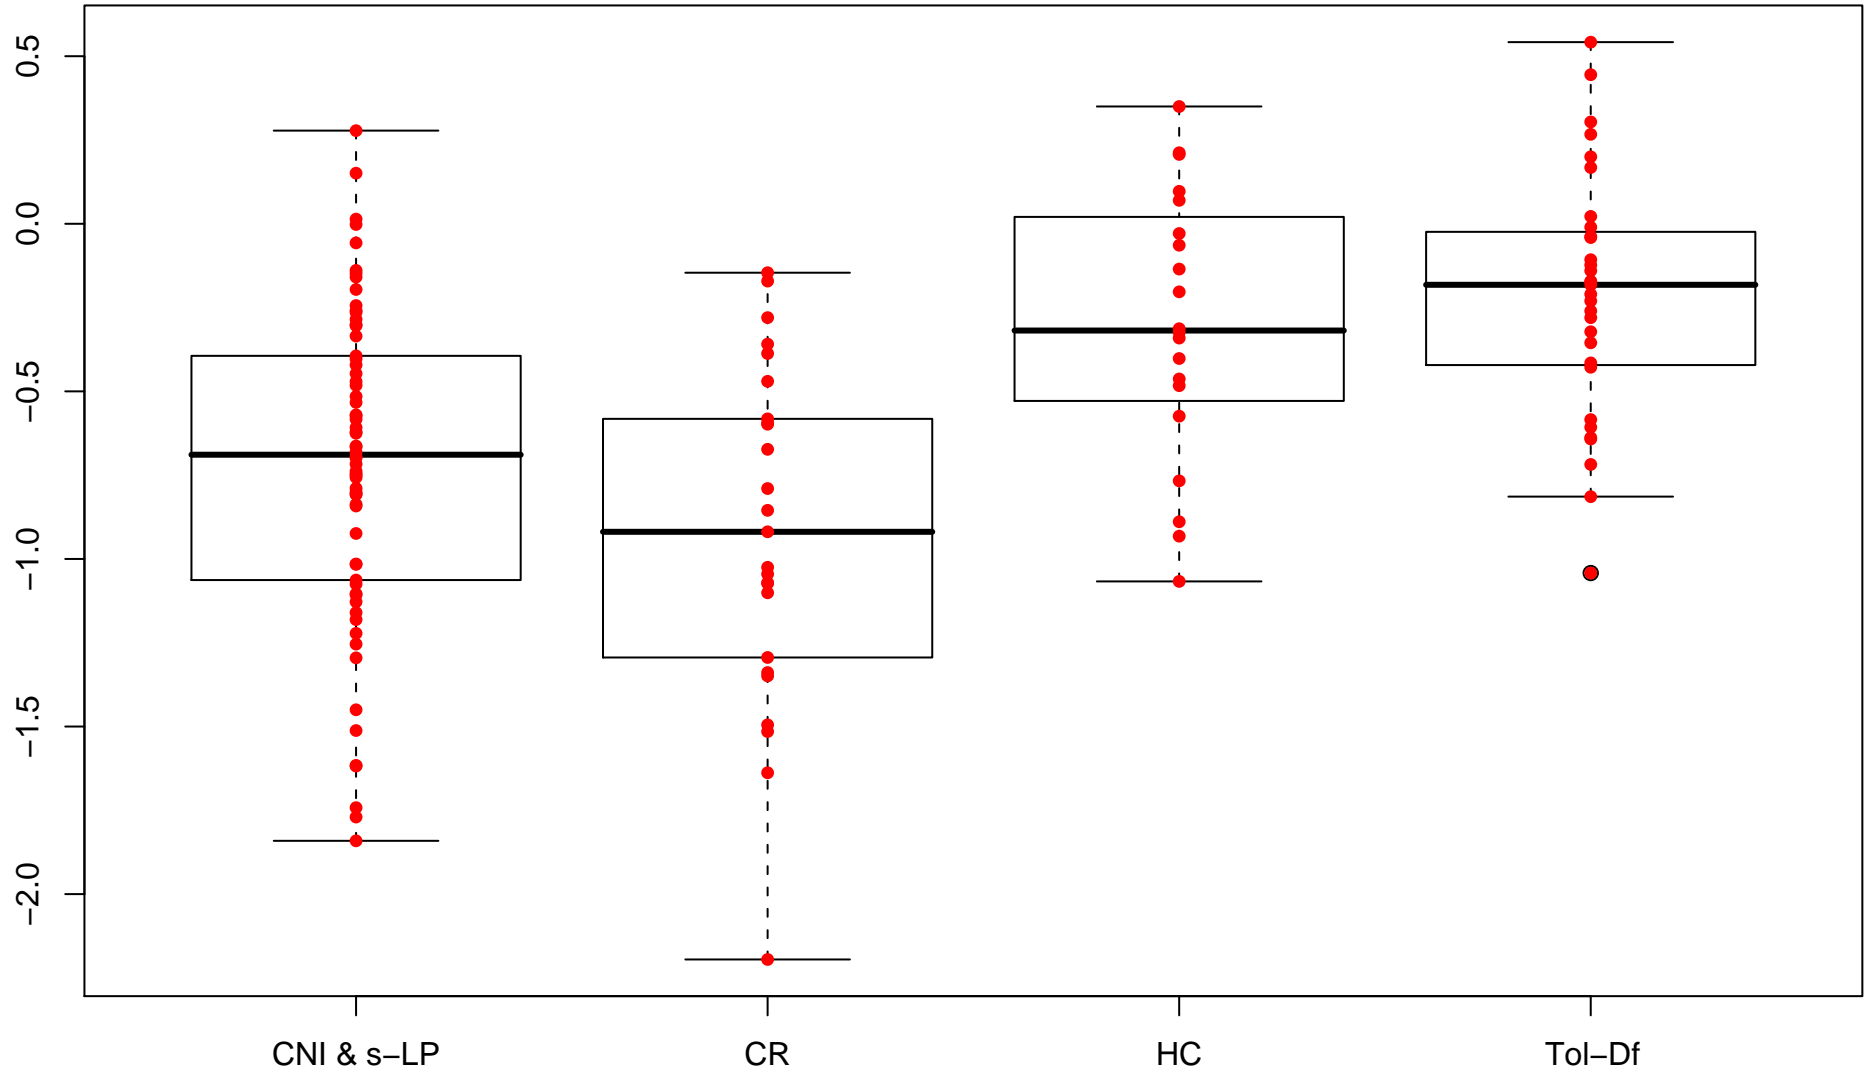



Rank 48 : FANK1  
4.491e-08

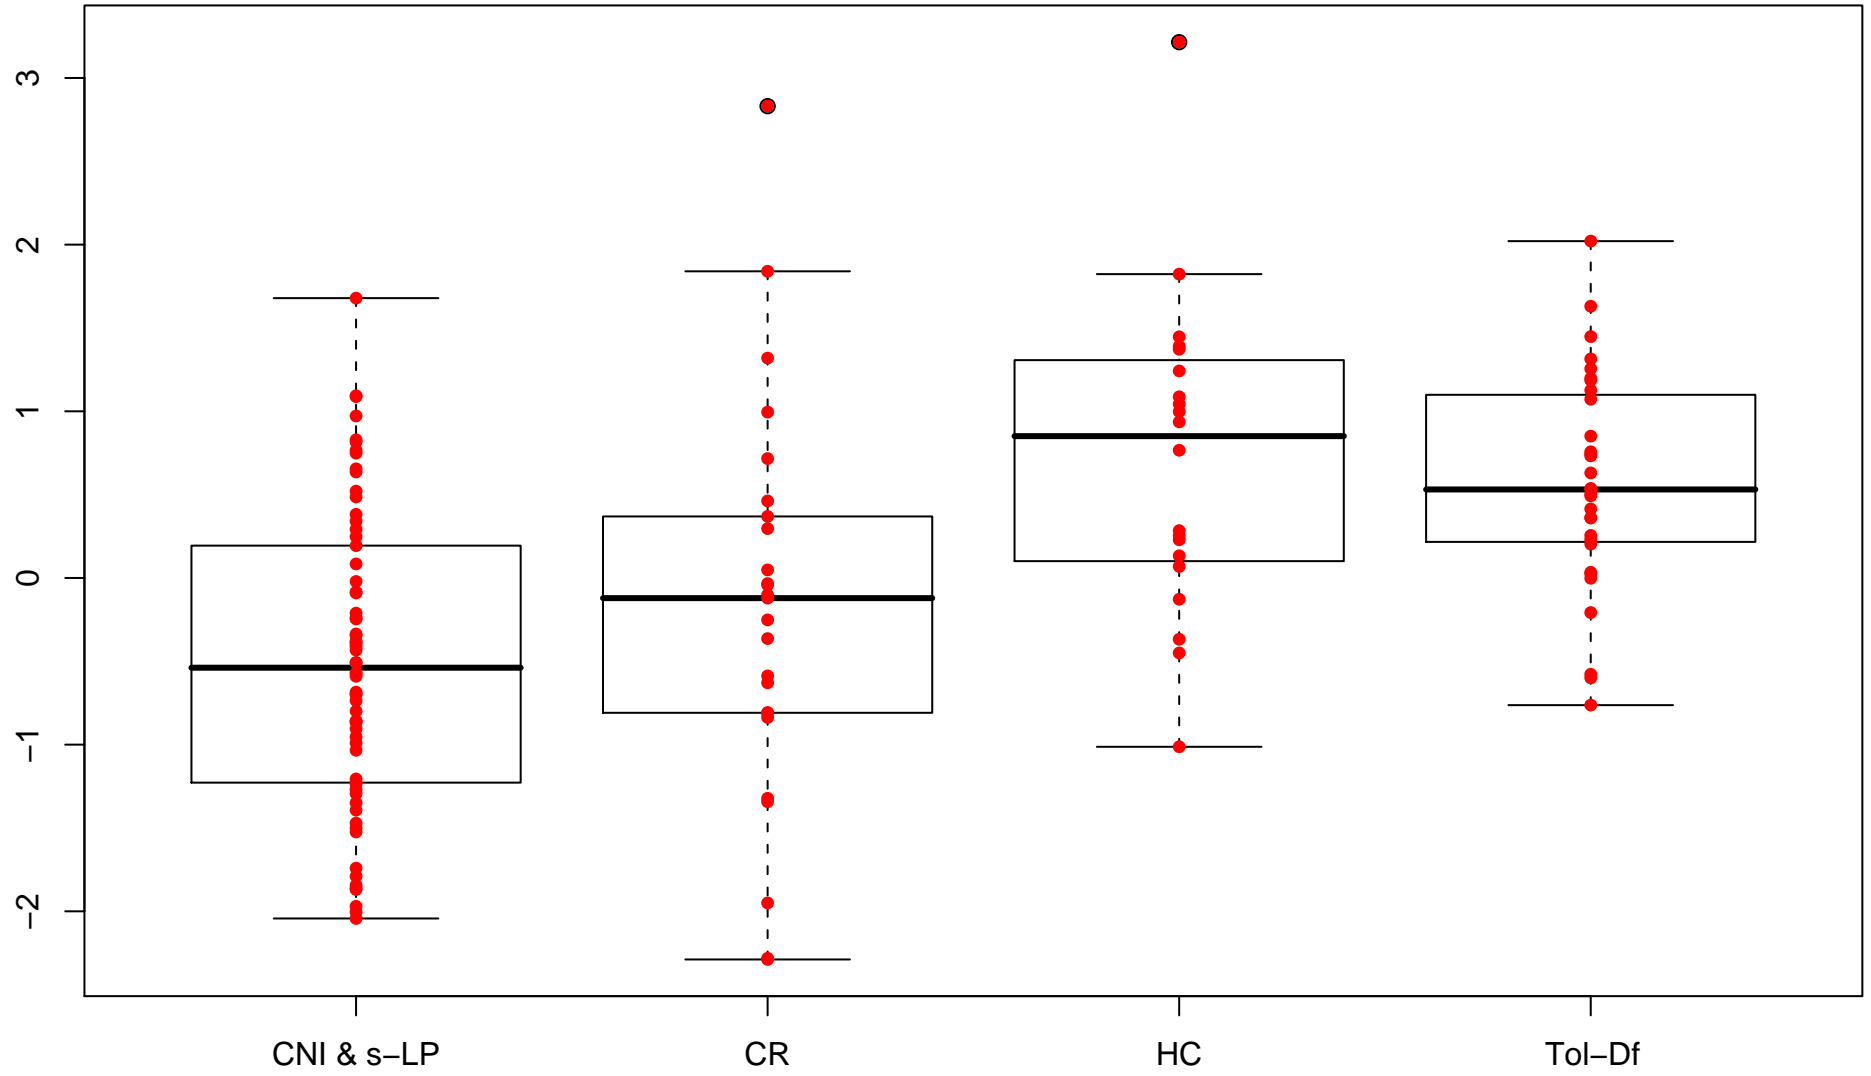

Rank 49 : RHOH  
5.184e-08

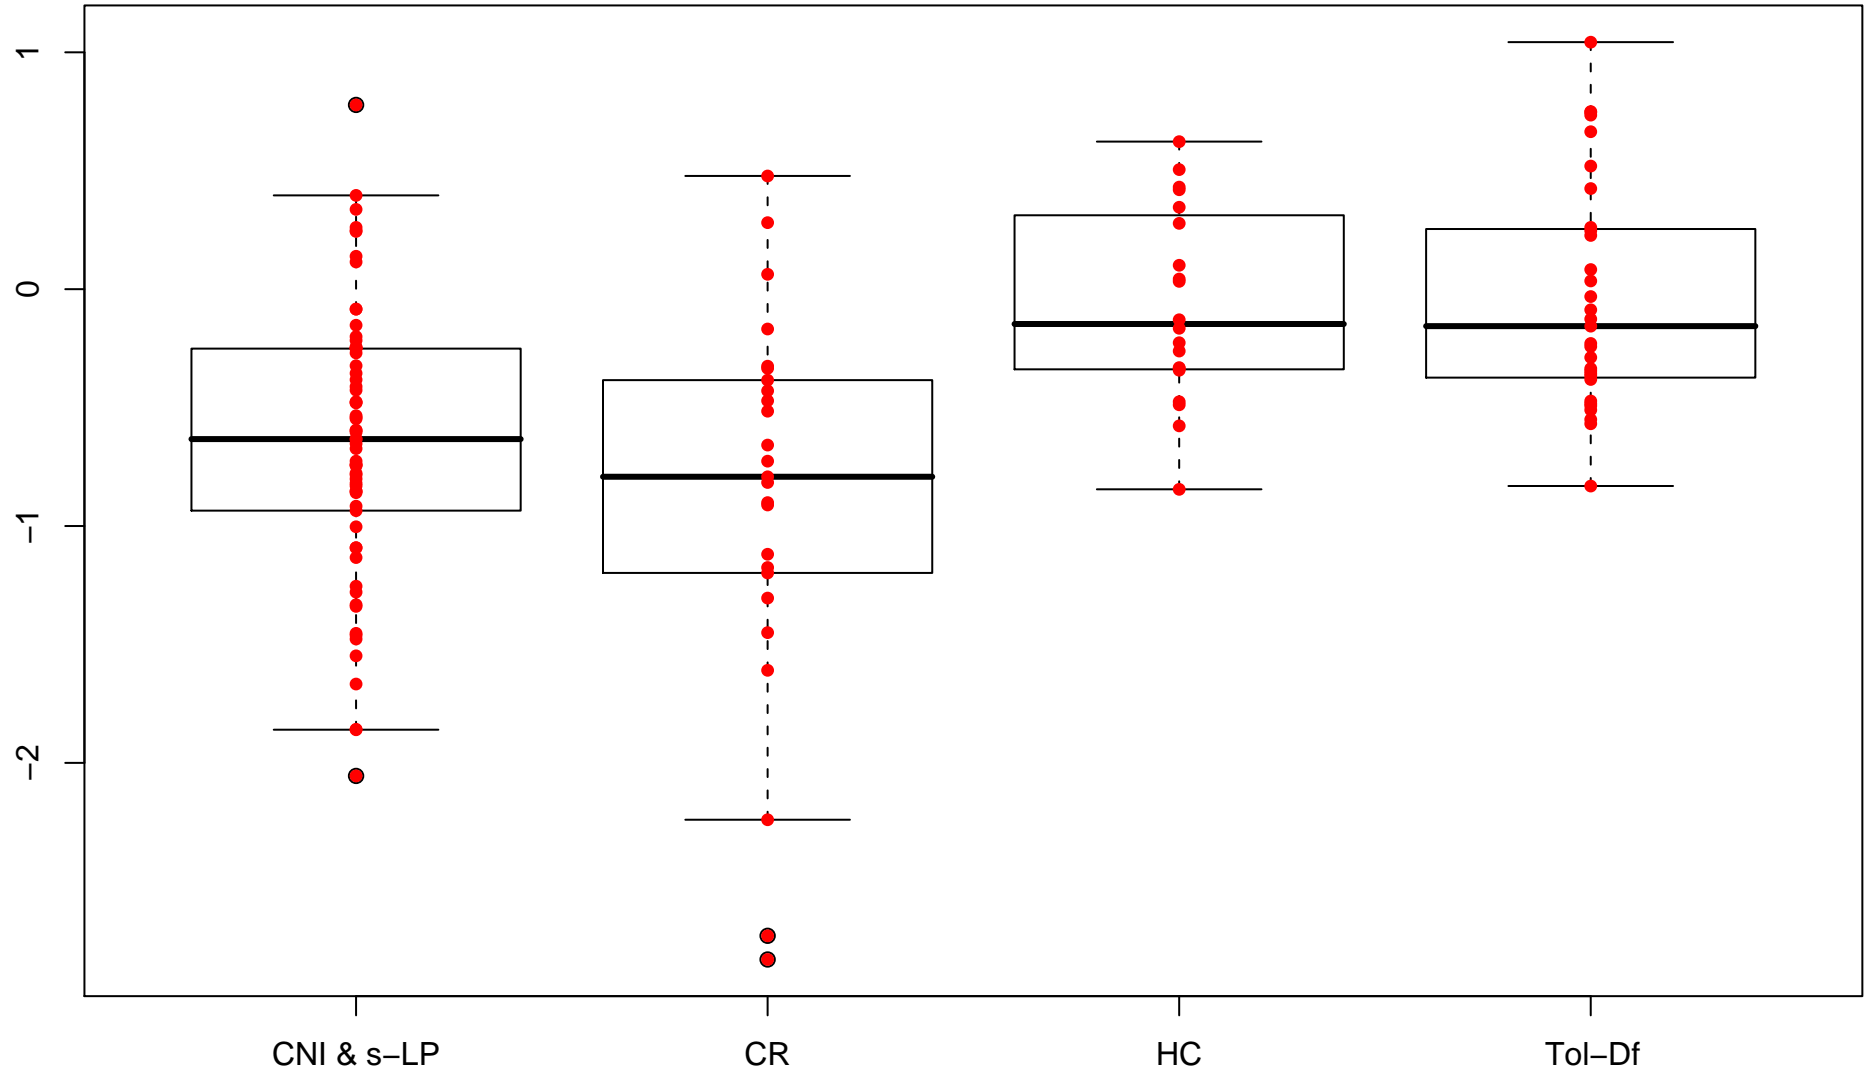

Rank 50 : IGLC  
5.384e-08

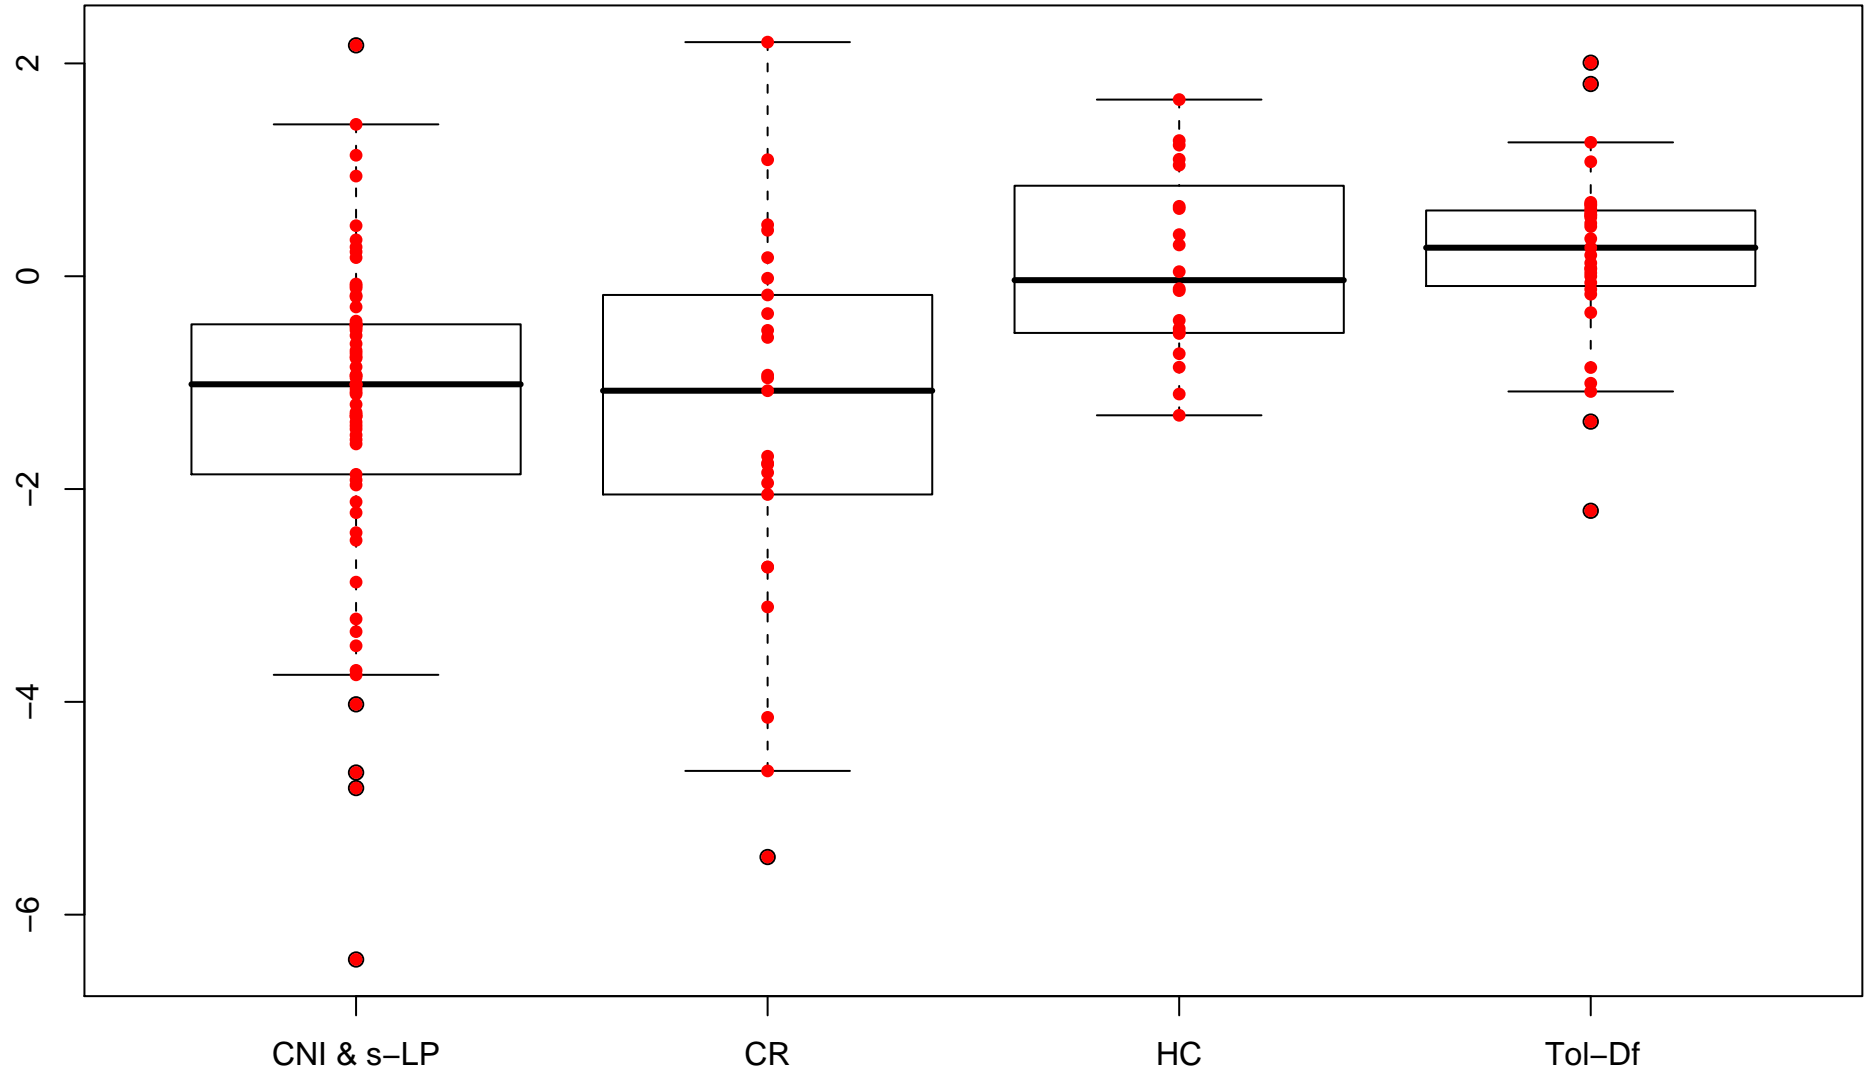

Rank 51 : ATL3  
5.802e-08

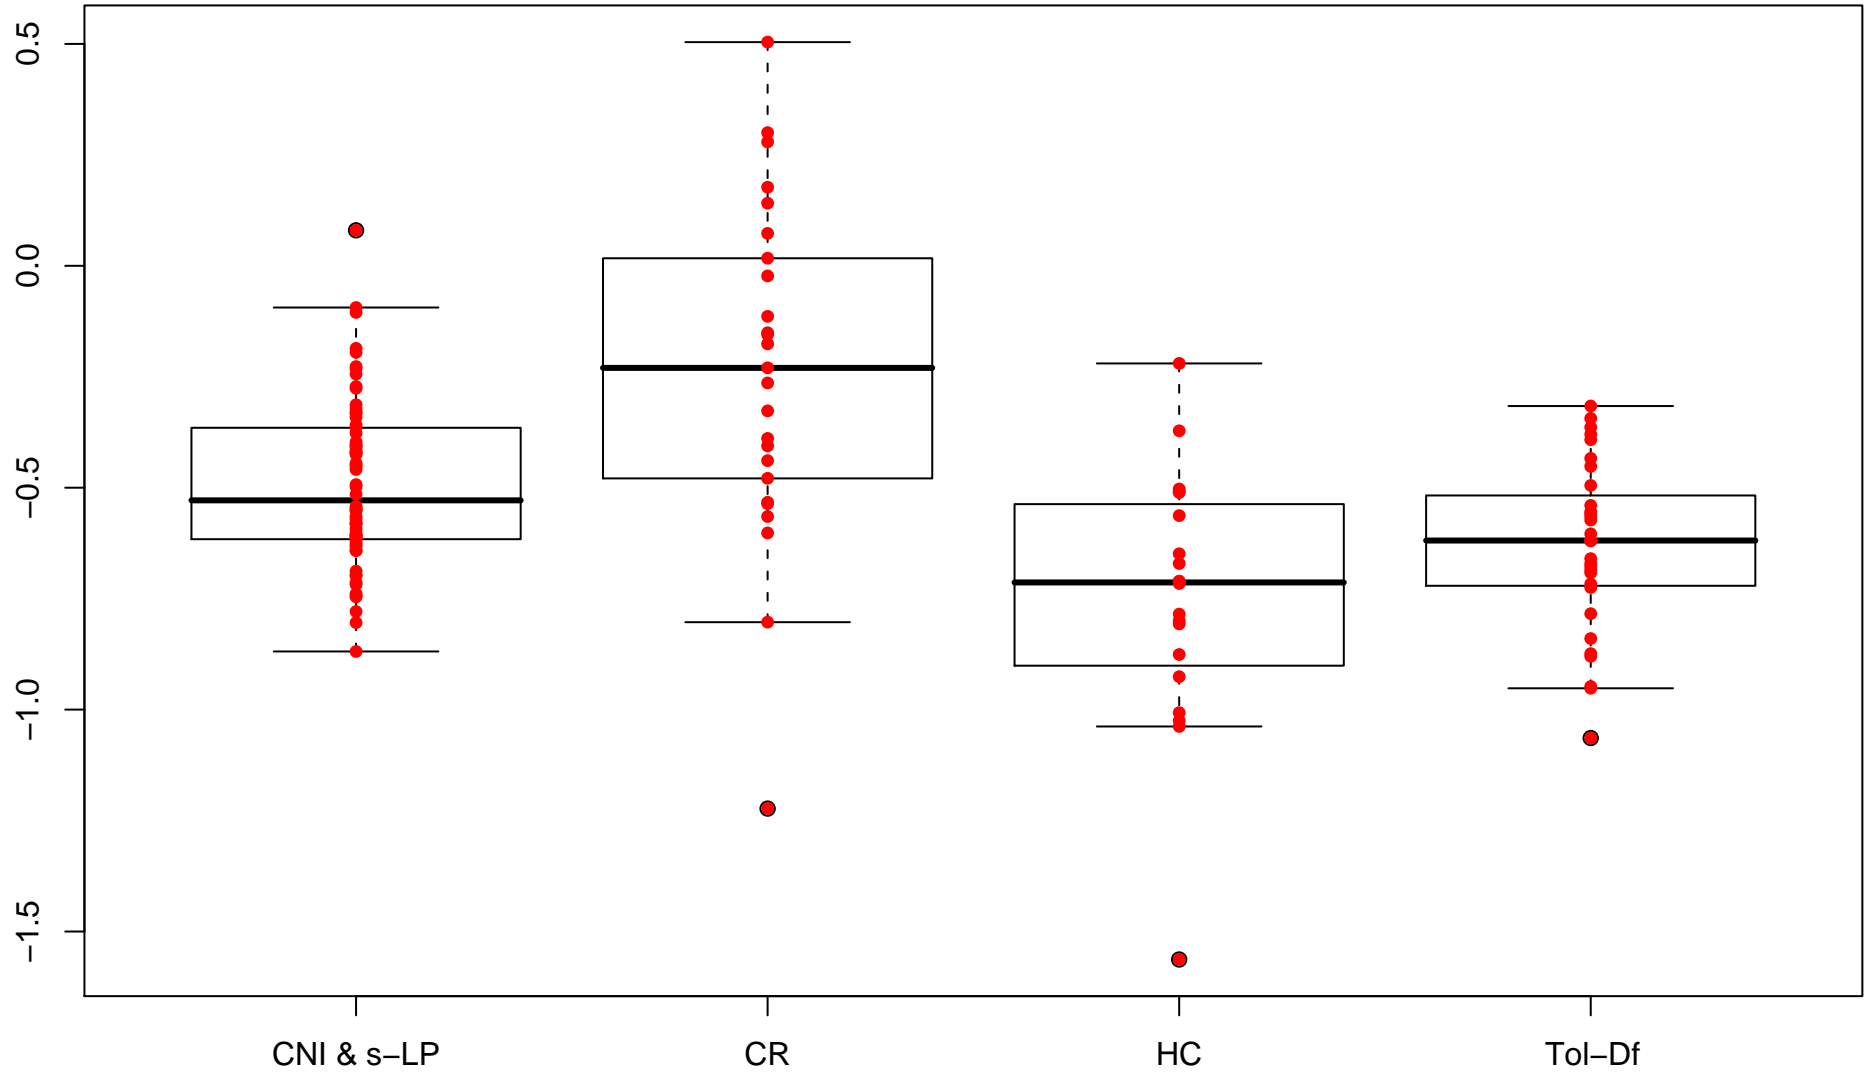

Rank 52 : THC2438936  
7.053e-08

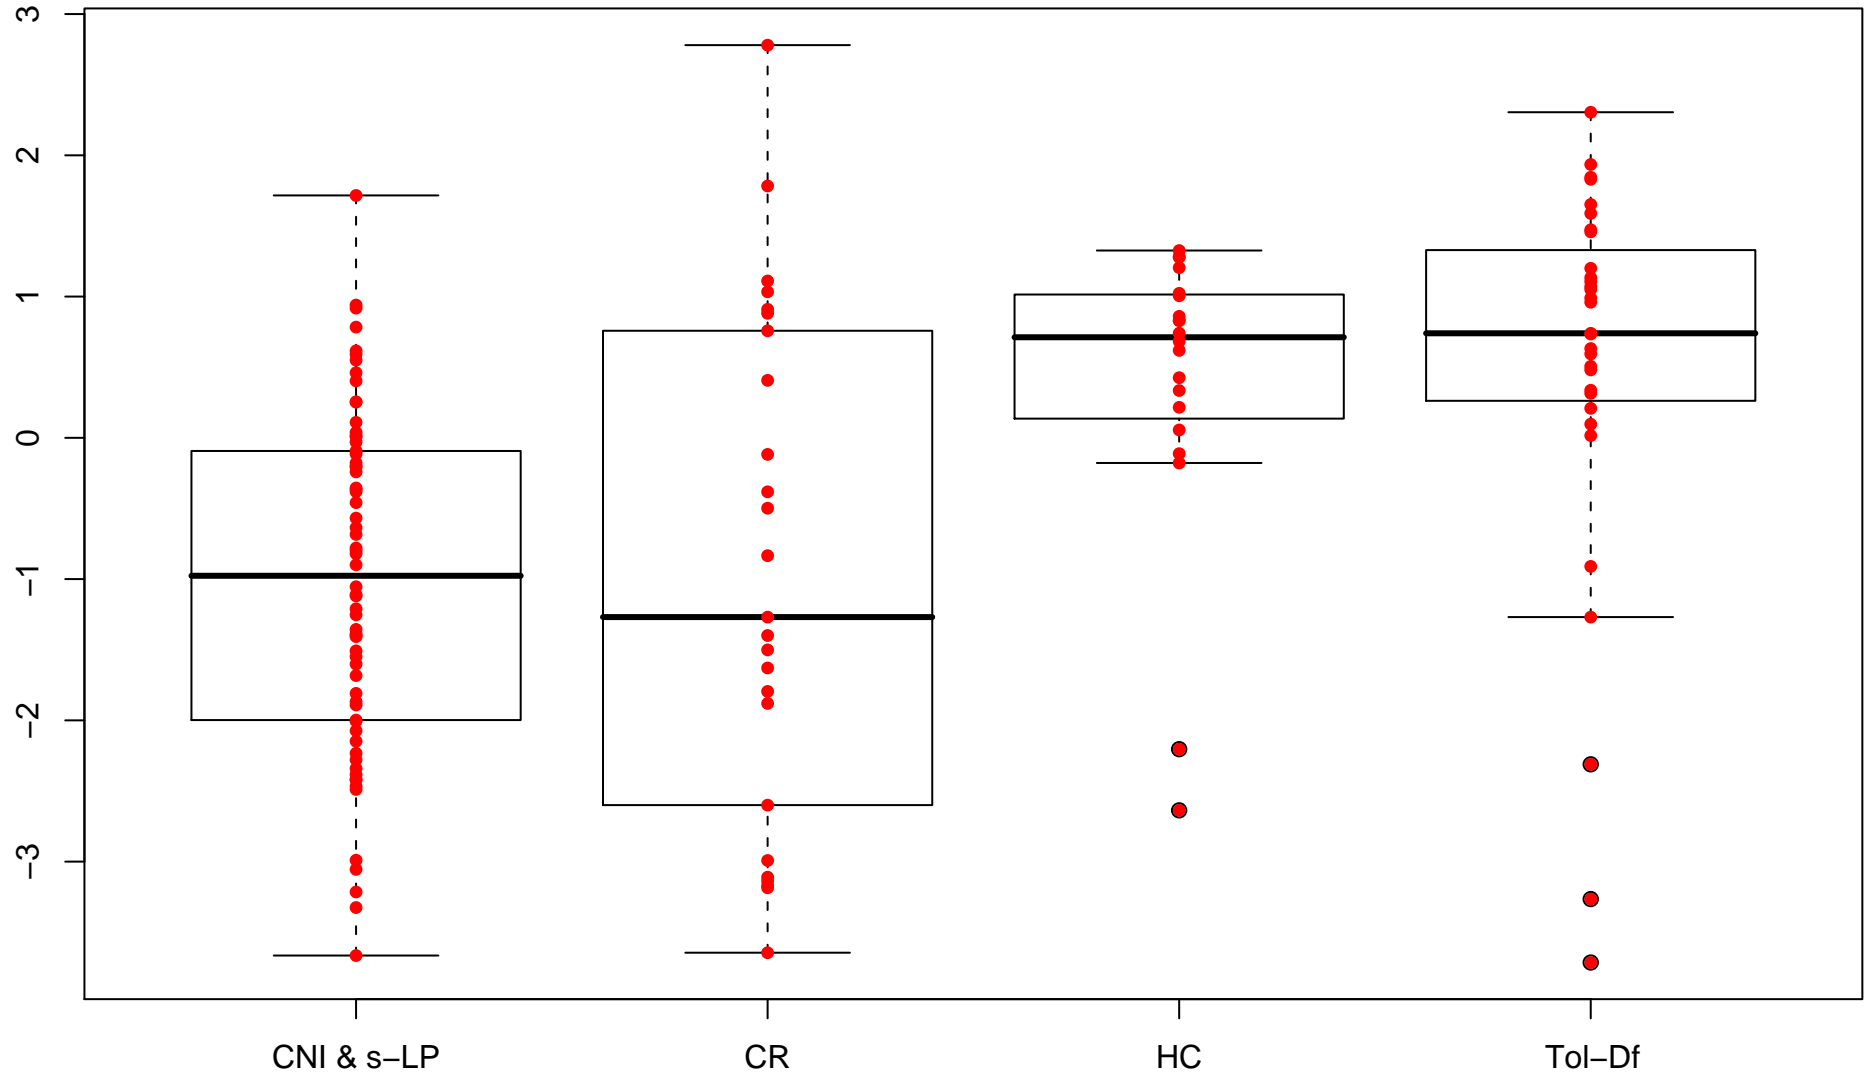

Rank 53 : PNOG  
7.254e-08

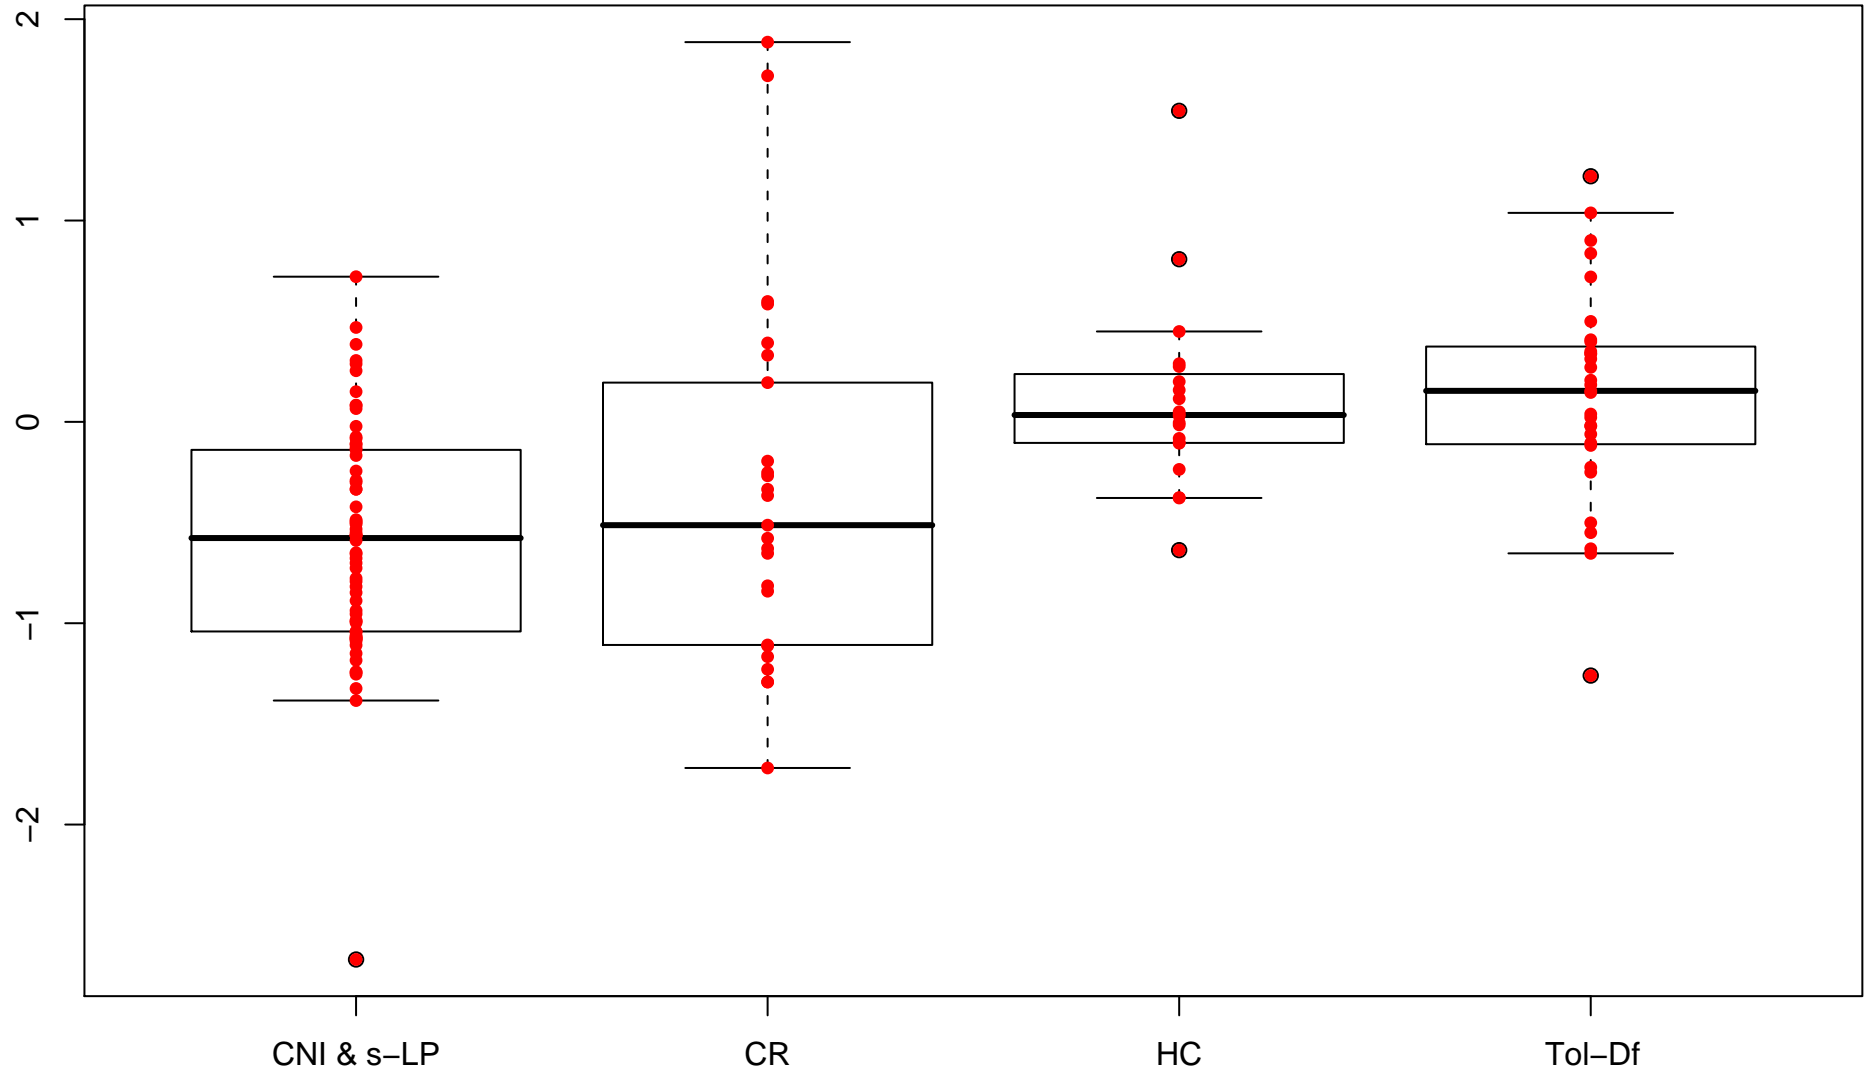

Rank 54 : LOC100131323  
8.289e-08

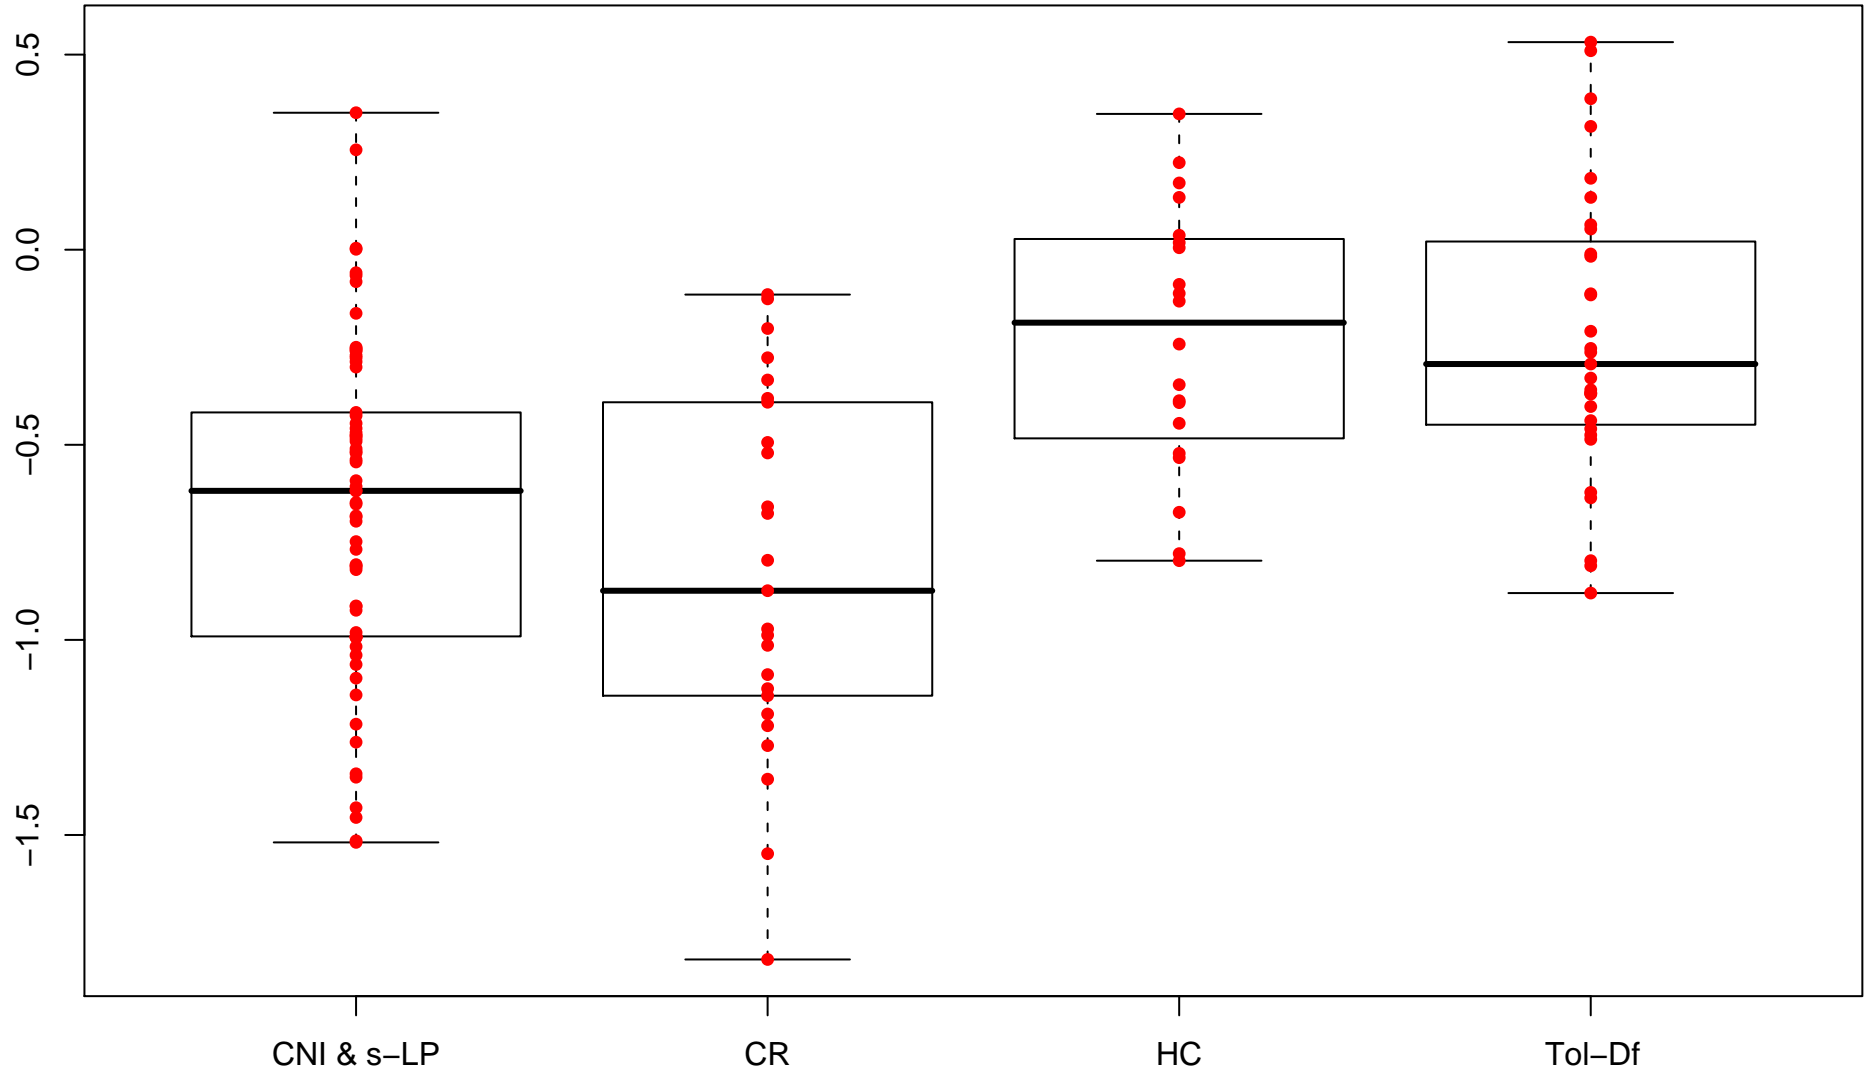

Rank 55 : IGHG1;IGHG2;IGHG3;IGHG4  
9.033e-08

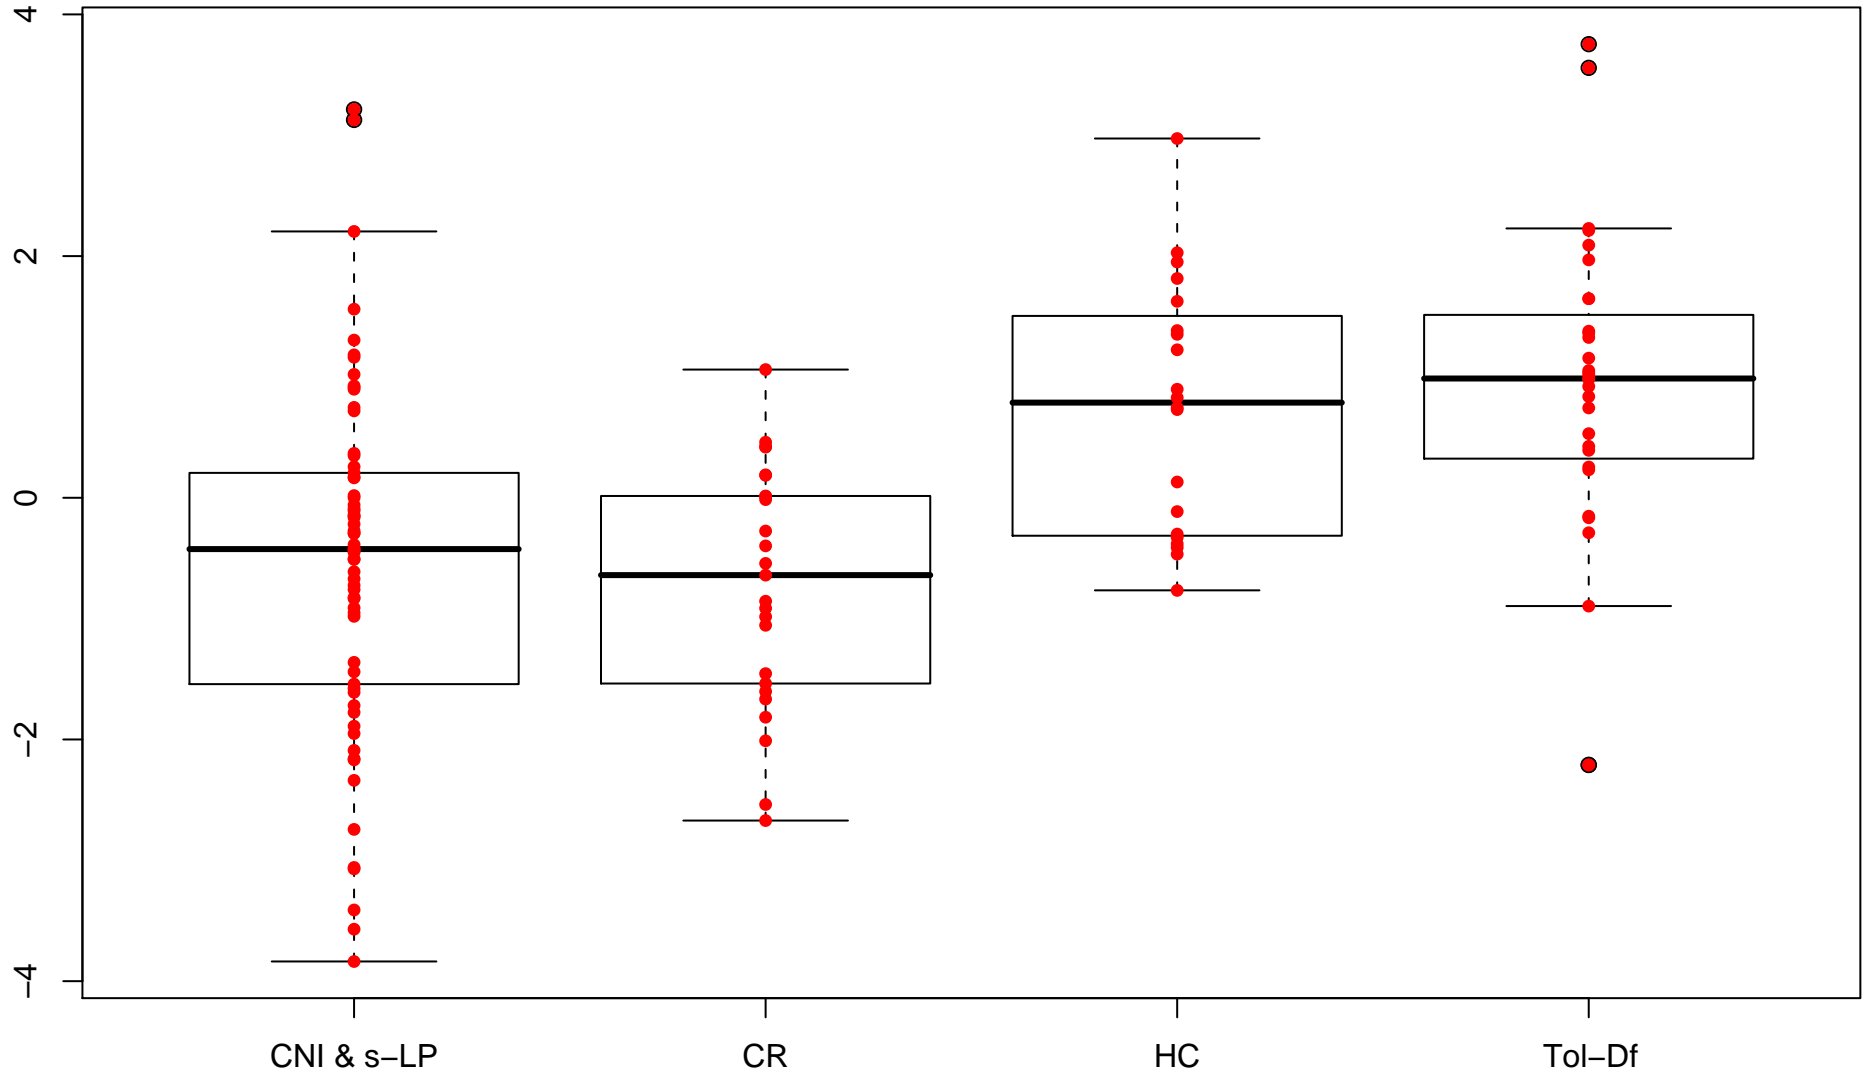



Rank 56 : FCRLA  
9.092e-08

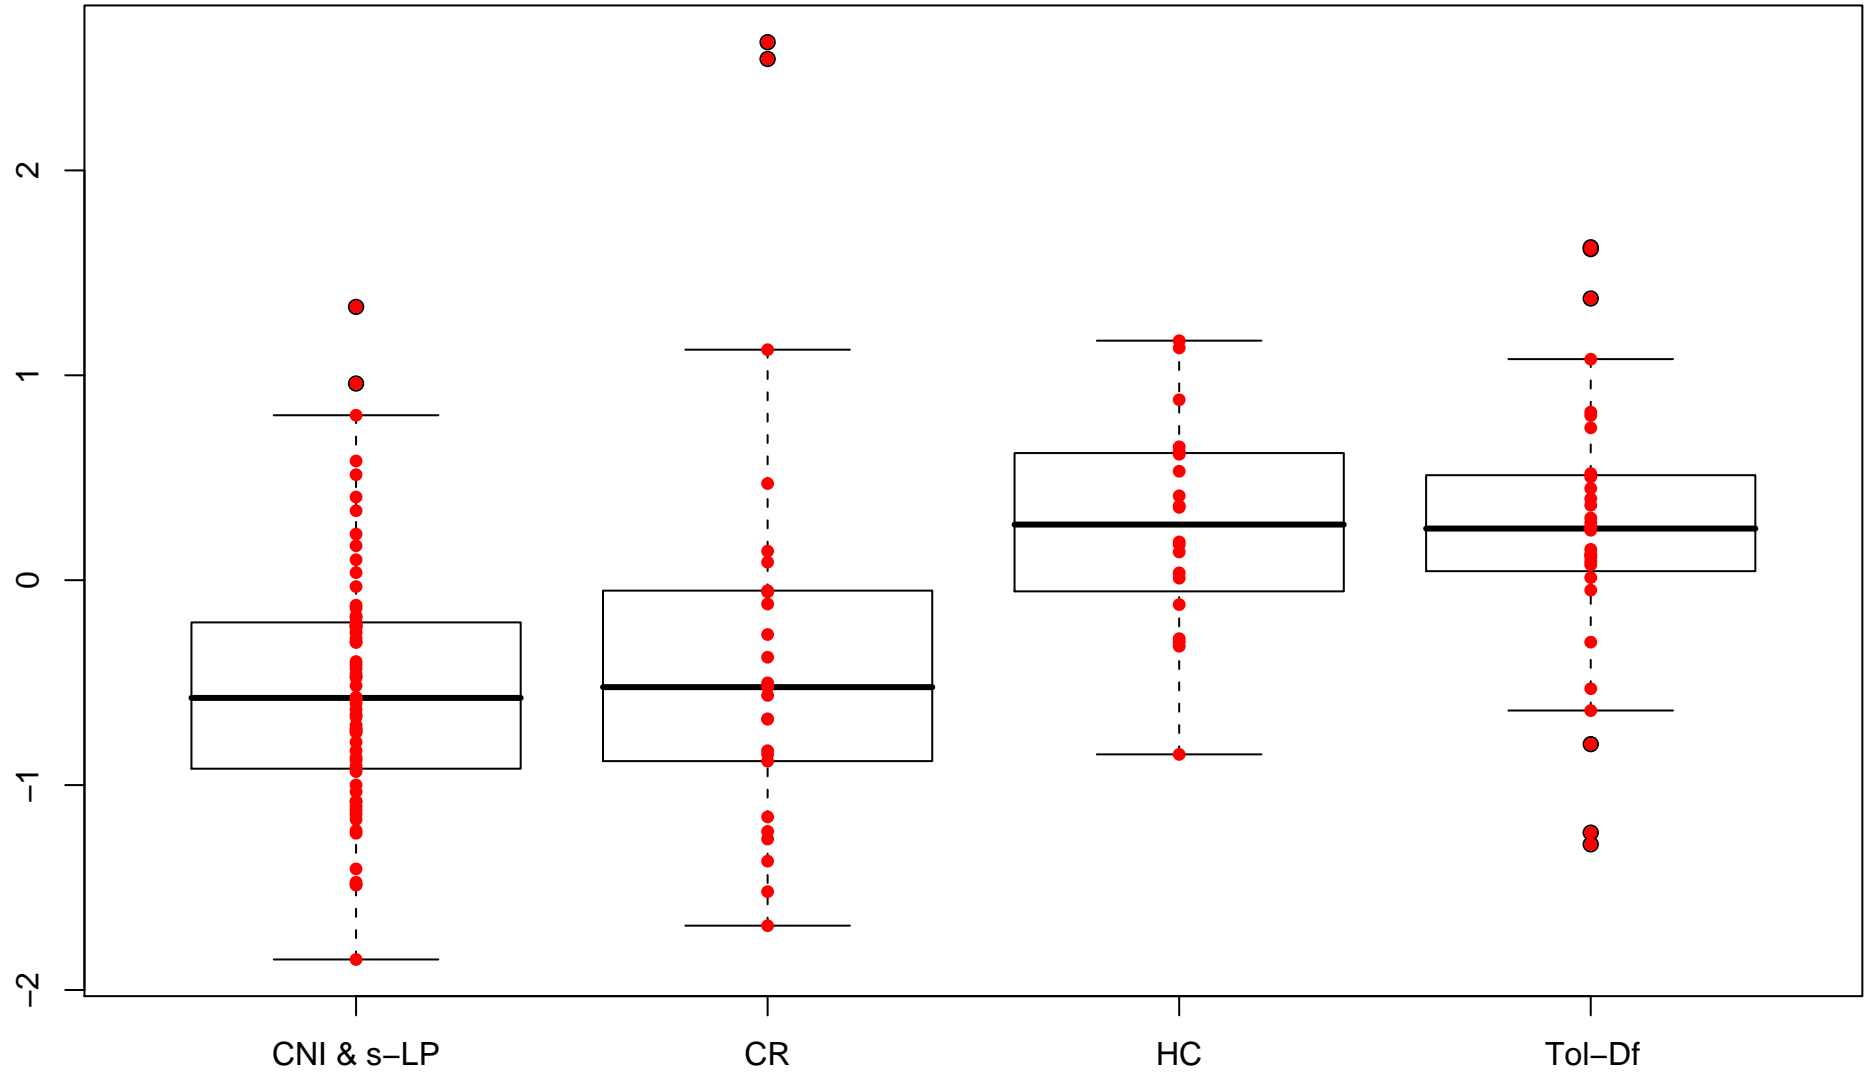

Rank 57 : MS4A1  
9.259e-08

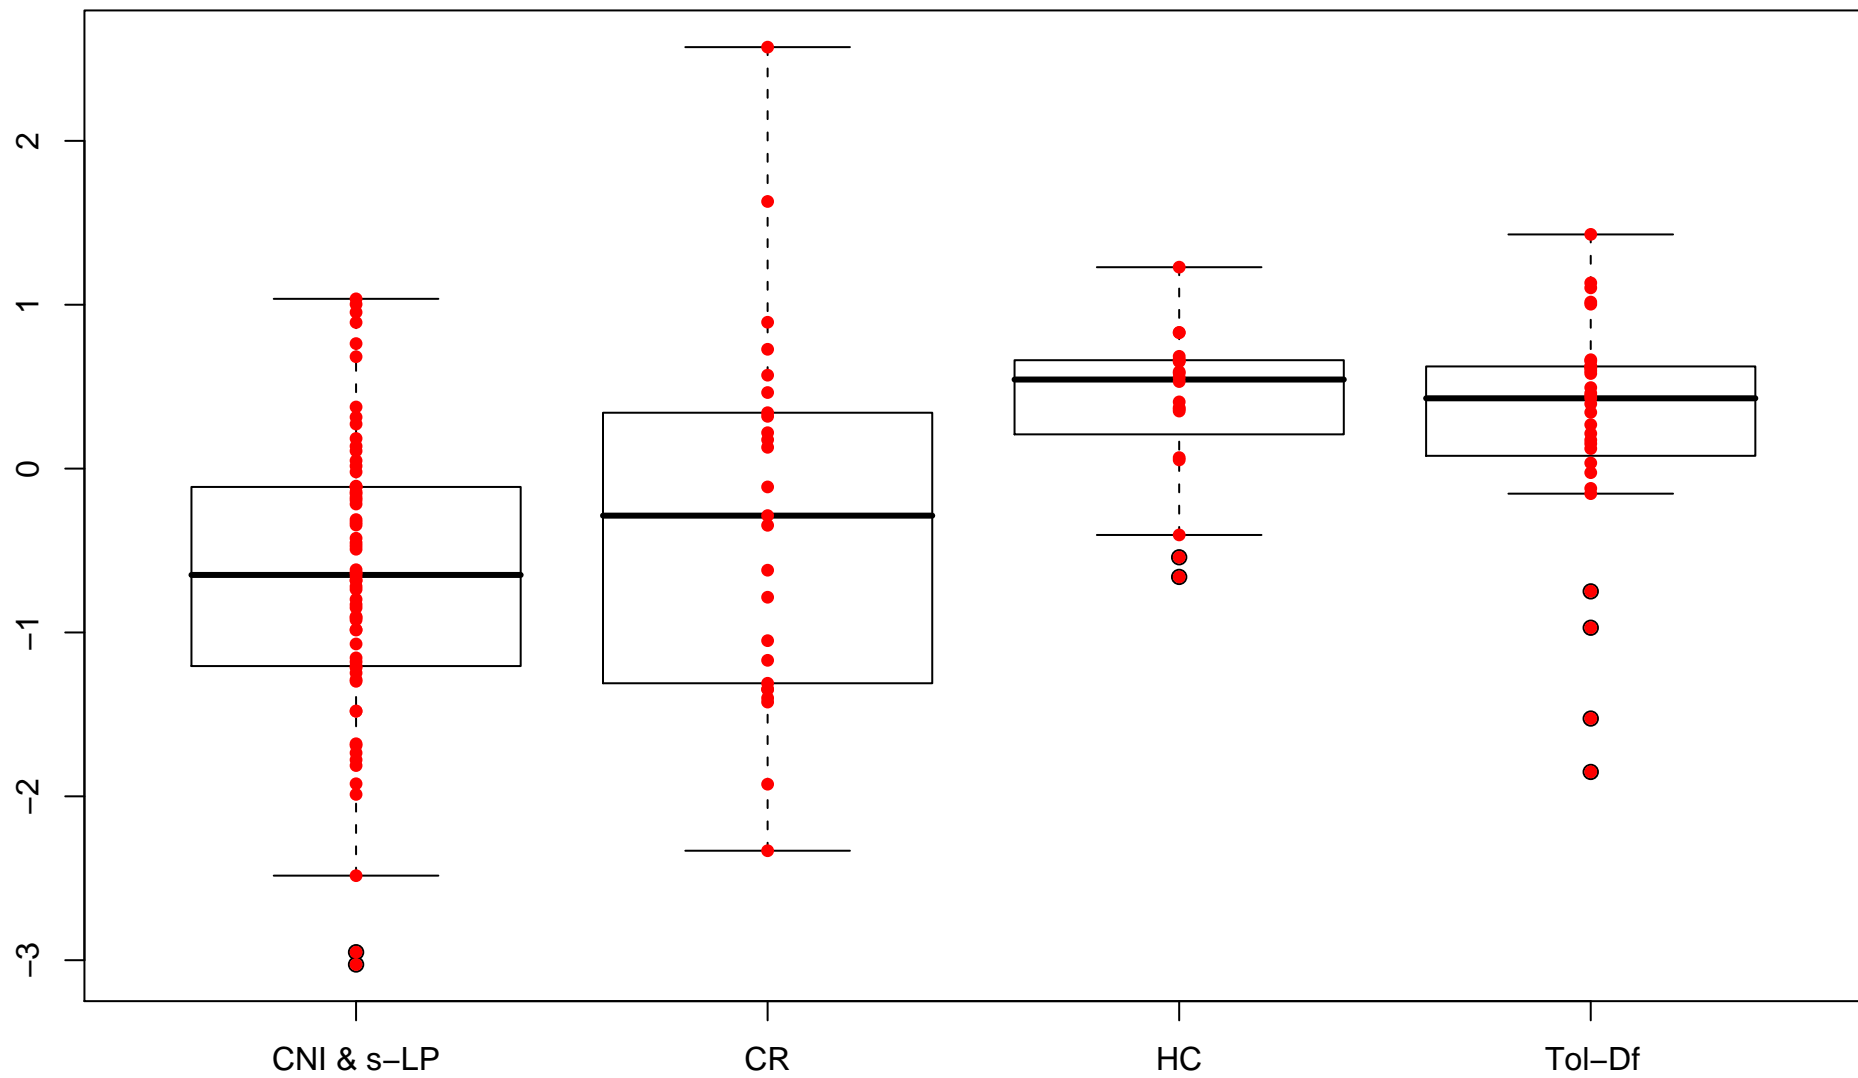

Rank 58 : TMEM49  
9.328e-08

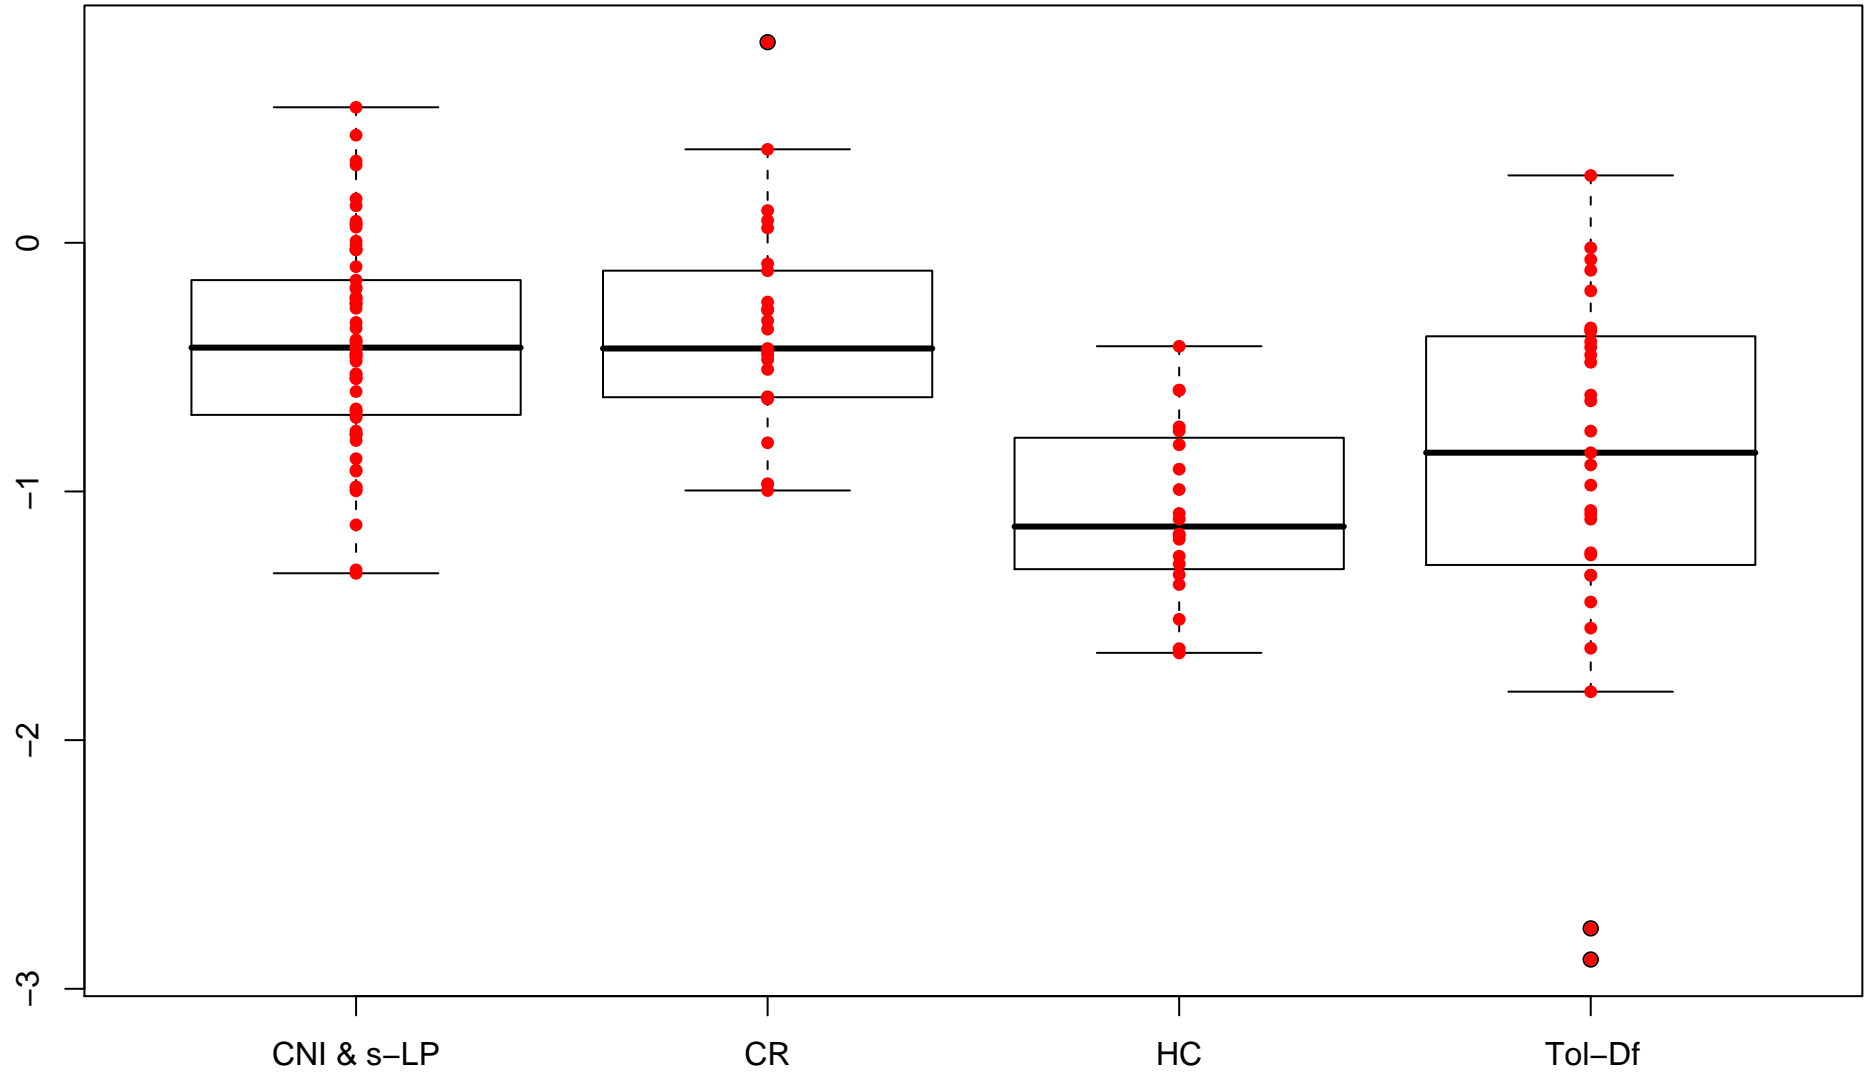

Rank 59 : BCL7A  
1.0907e-07

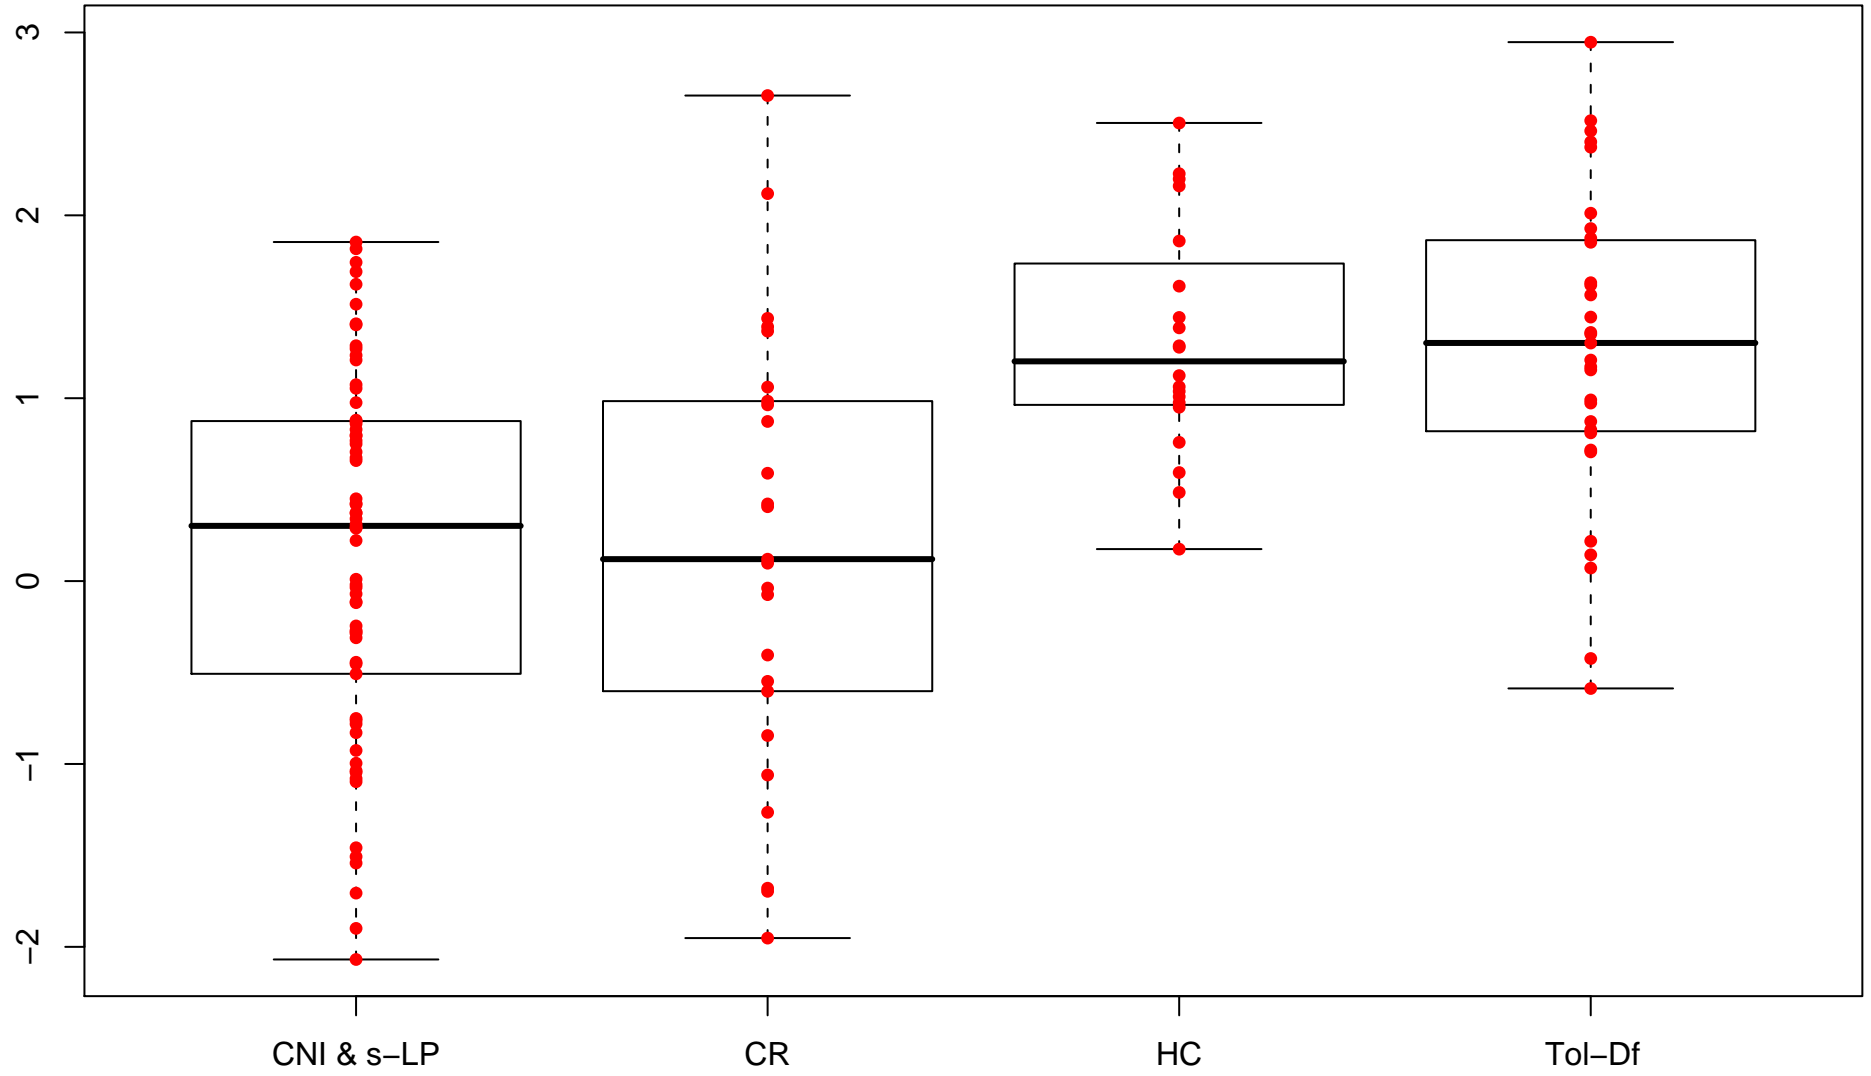

Rank 60 : PLXDC2  
1.1132e-07

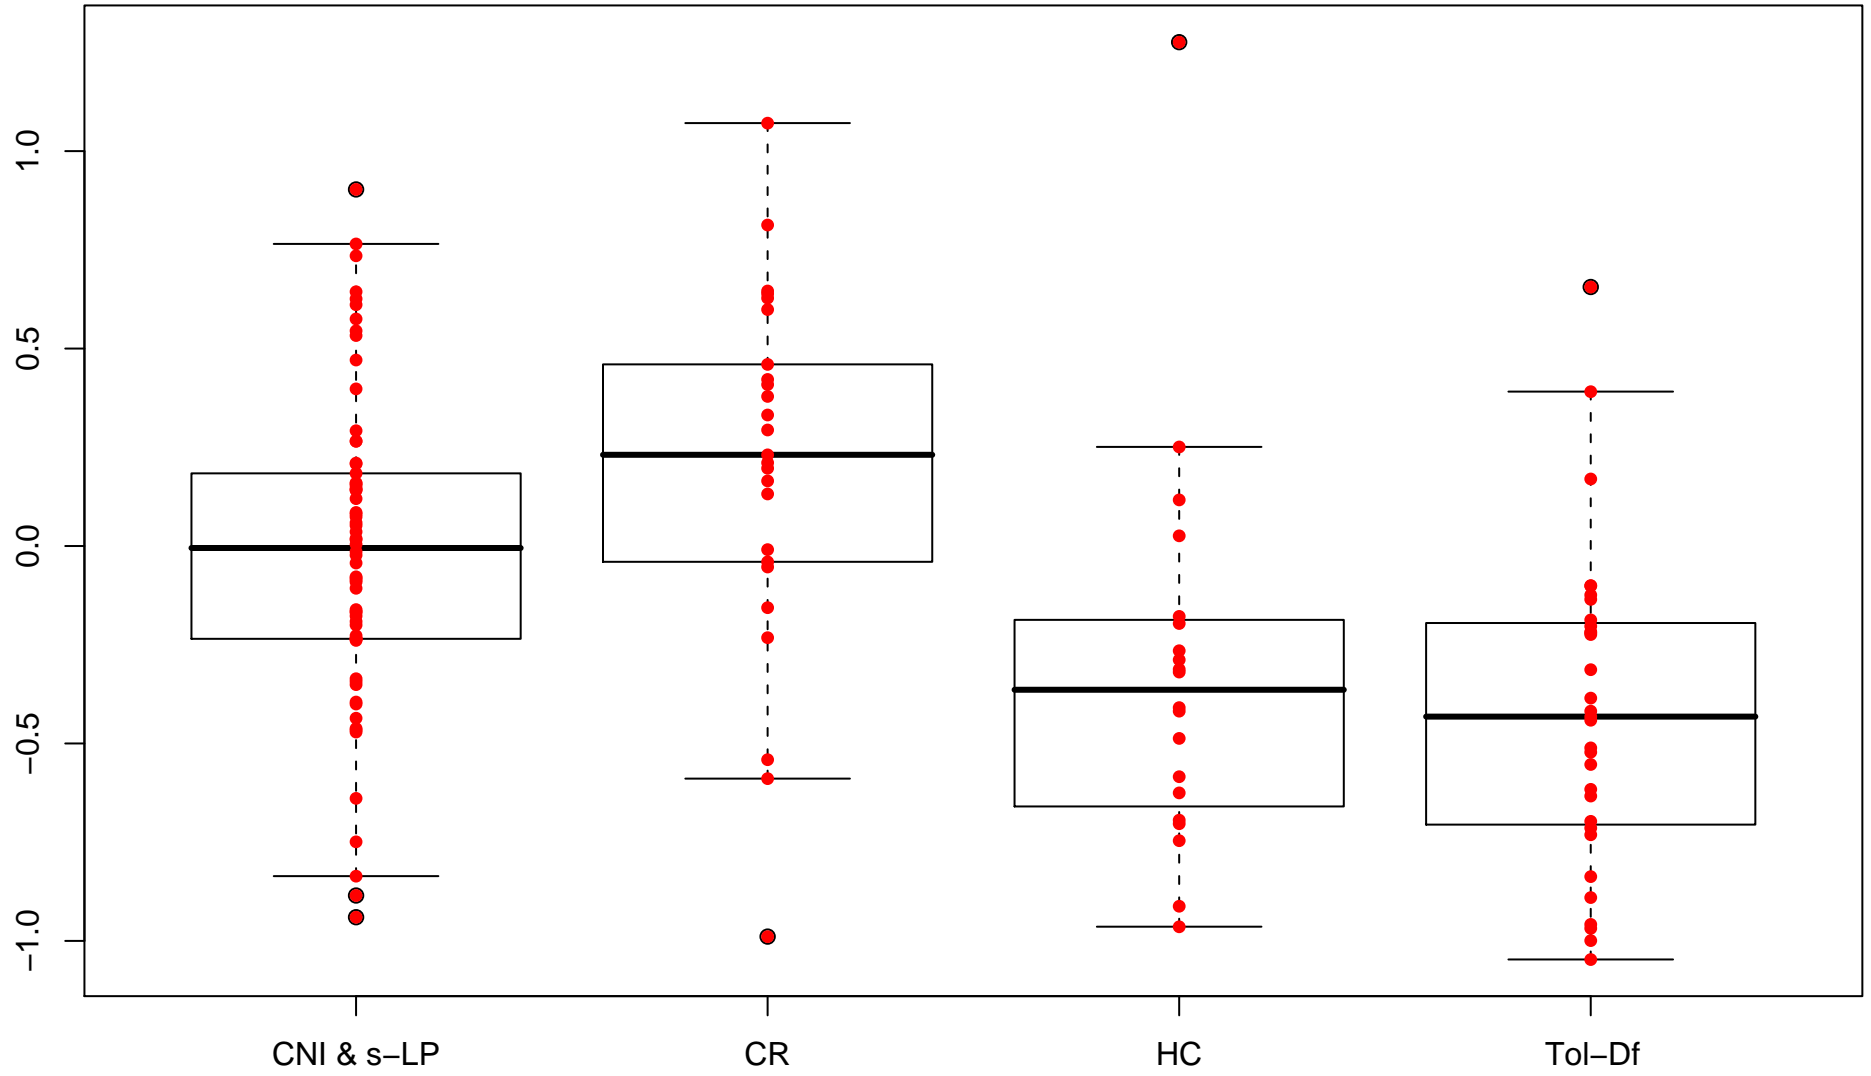

Rank 61 : CD28  
1.1314e-07

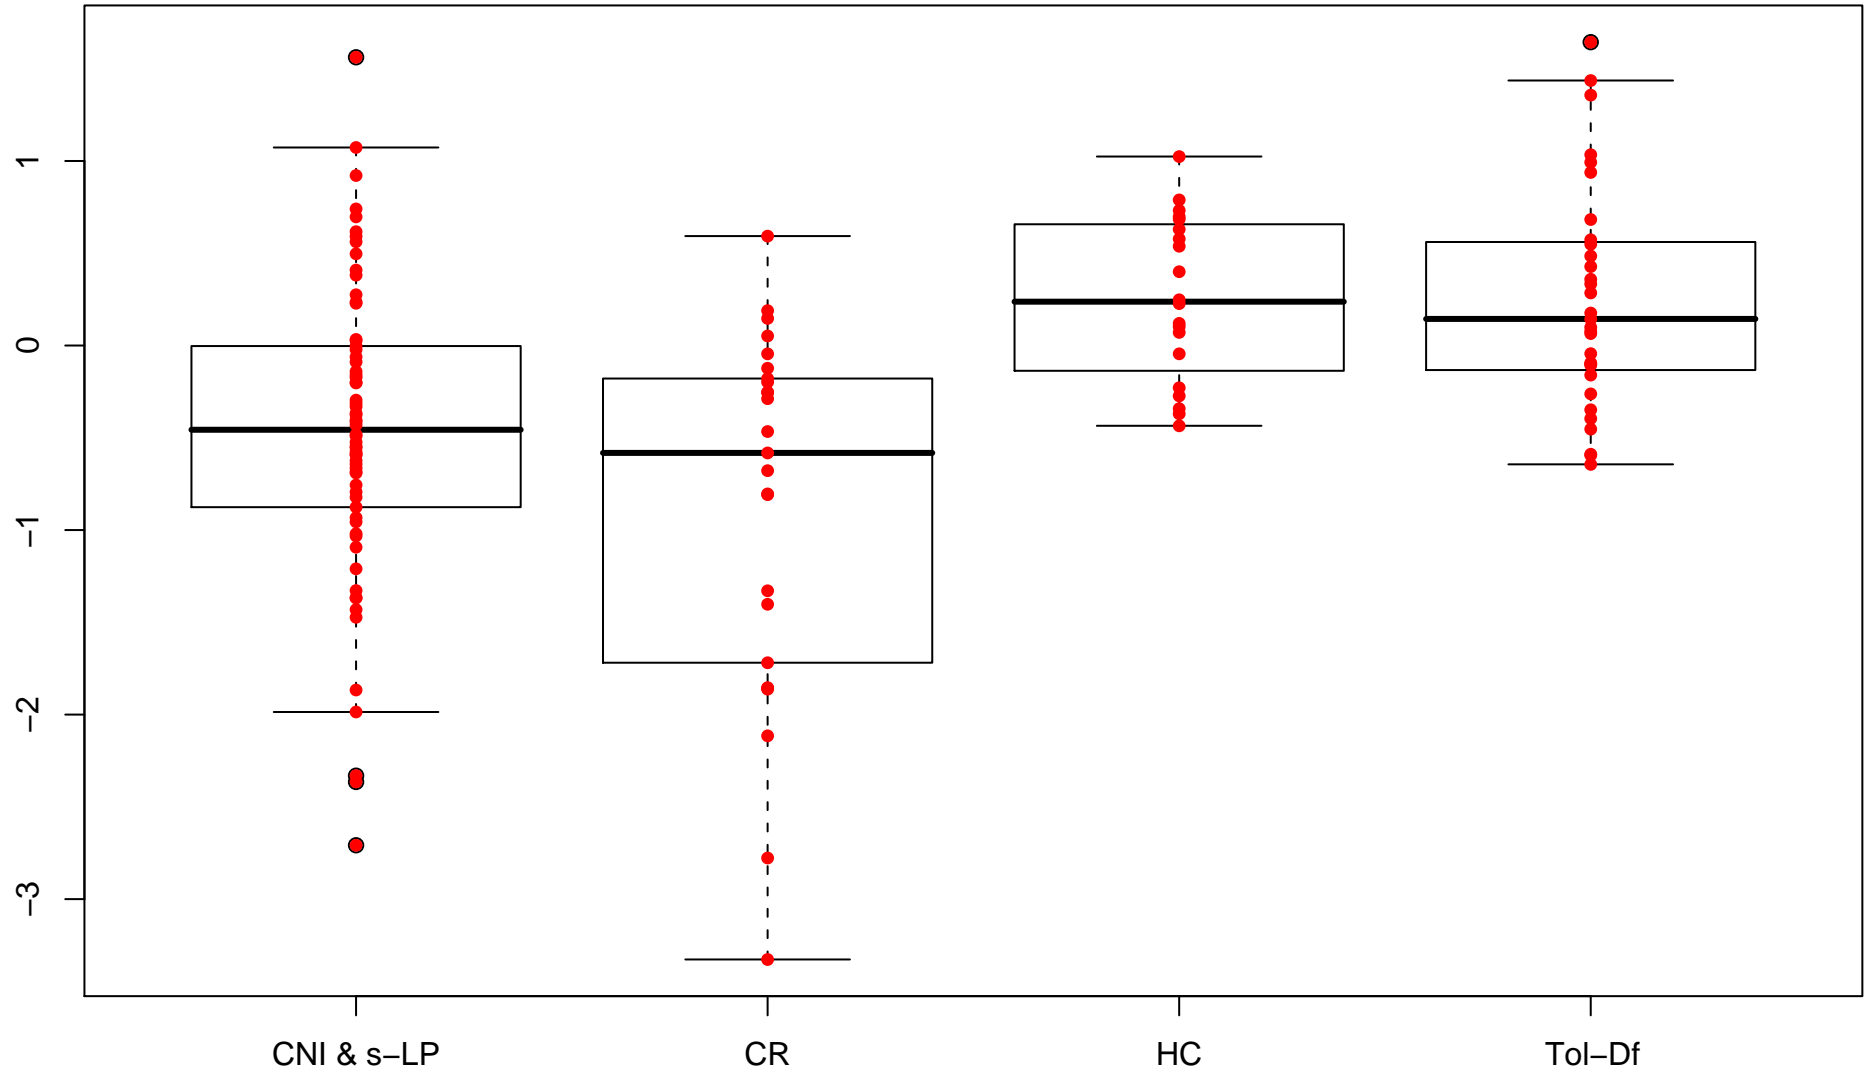

Rank 62 : SLAMF1  
1.1321e-07

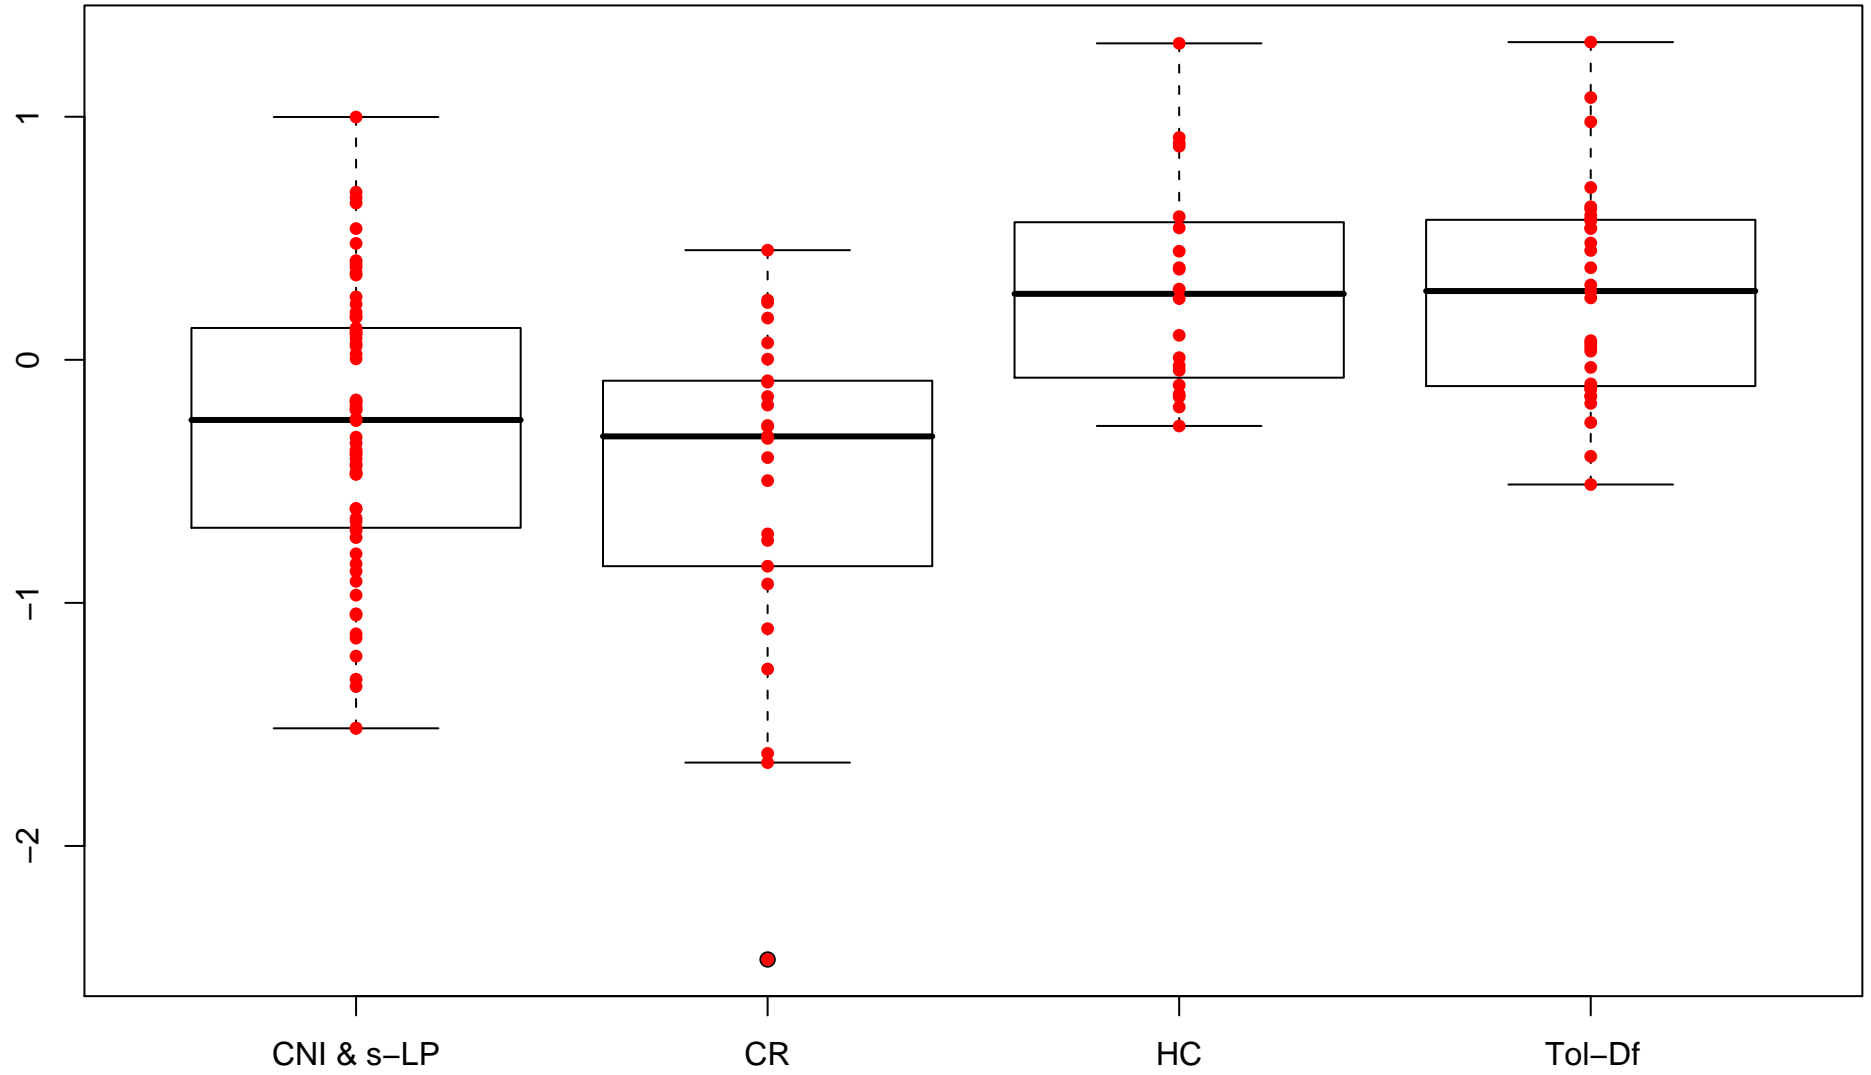

Rank 63 : DNASE1L3  
1.147e-07

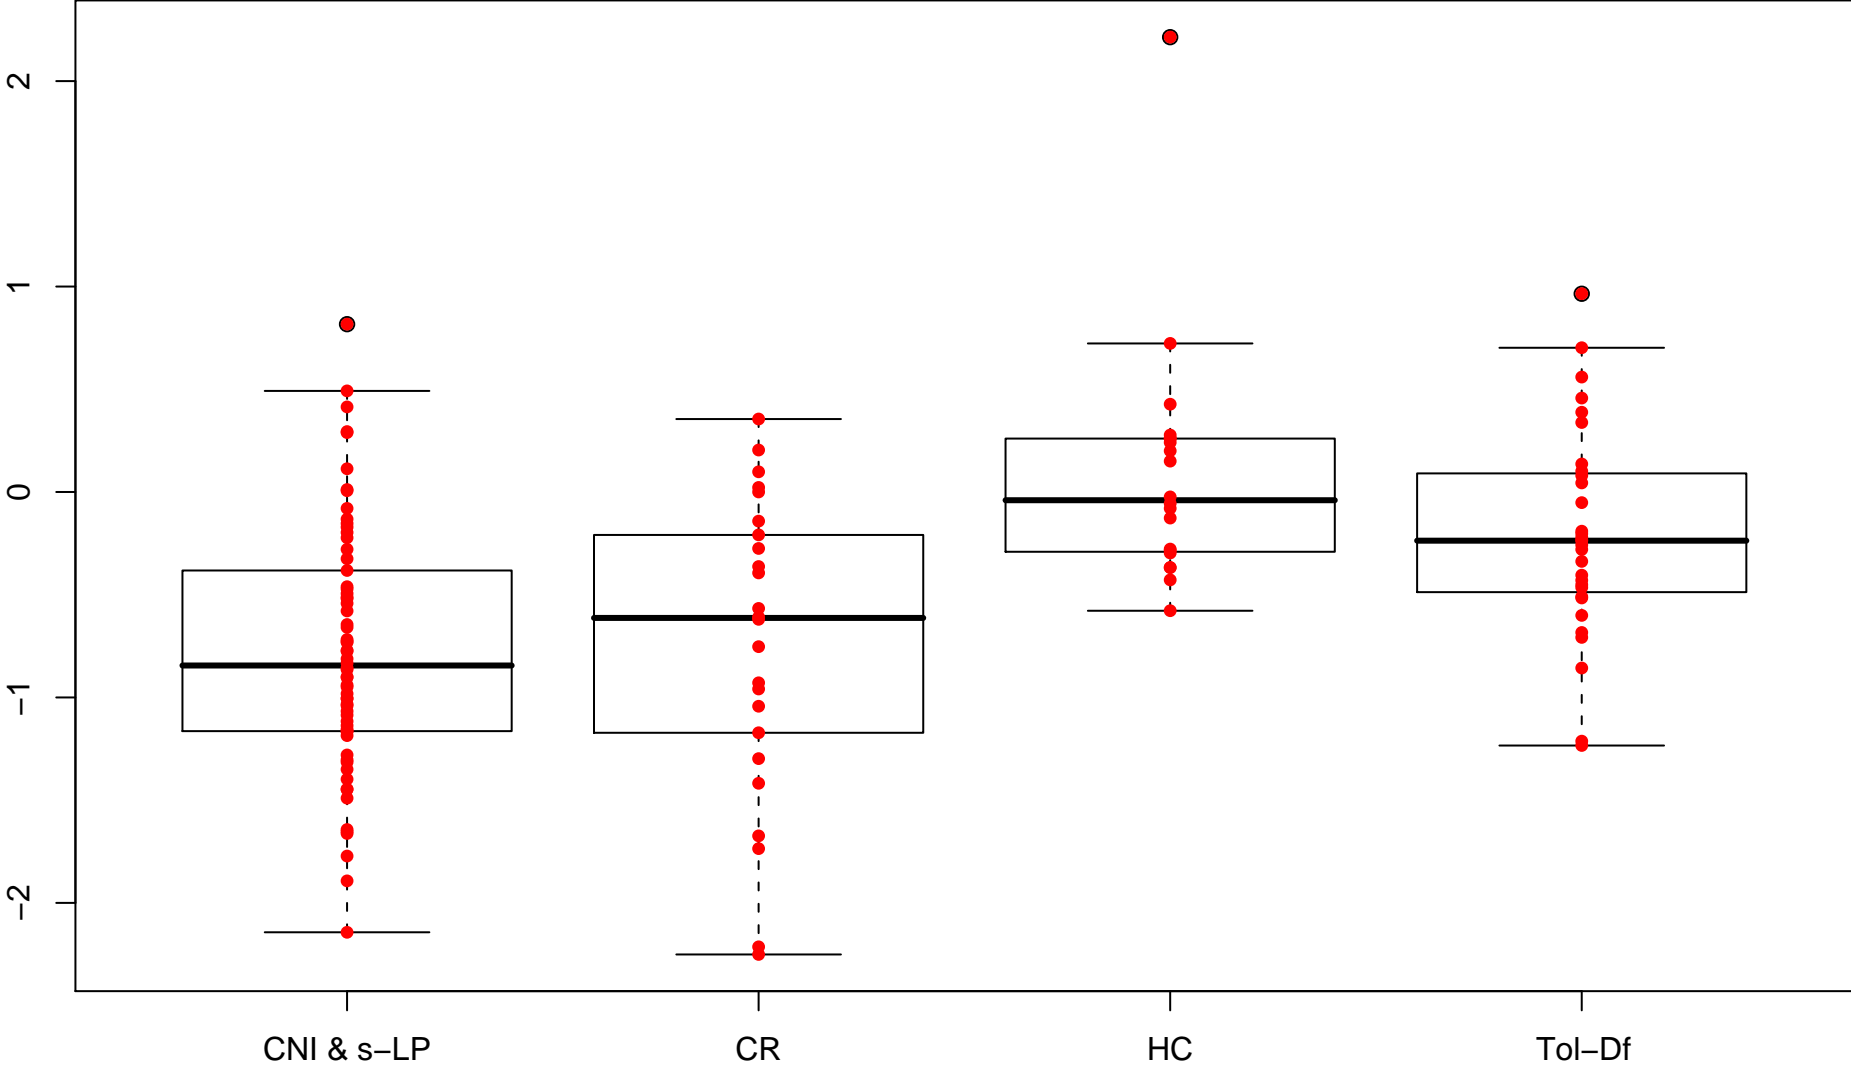



Rank 64 : FN1

1.163e-07

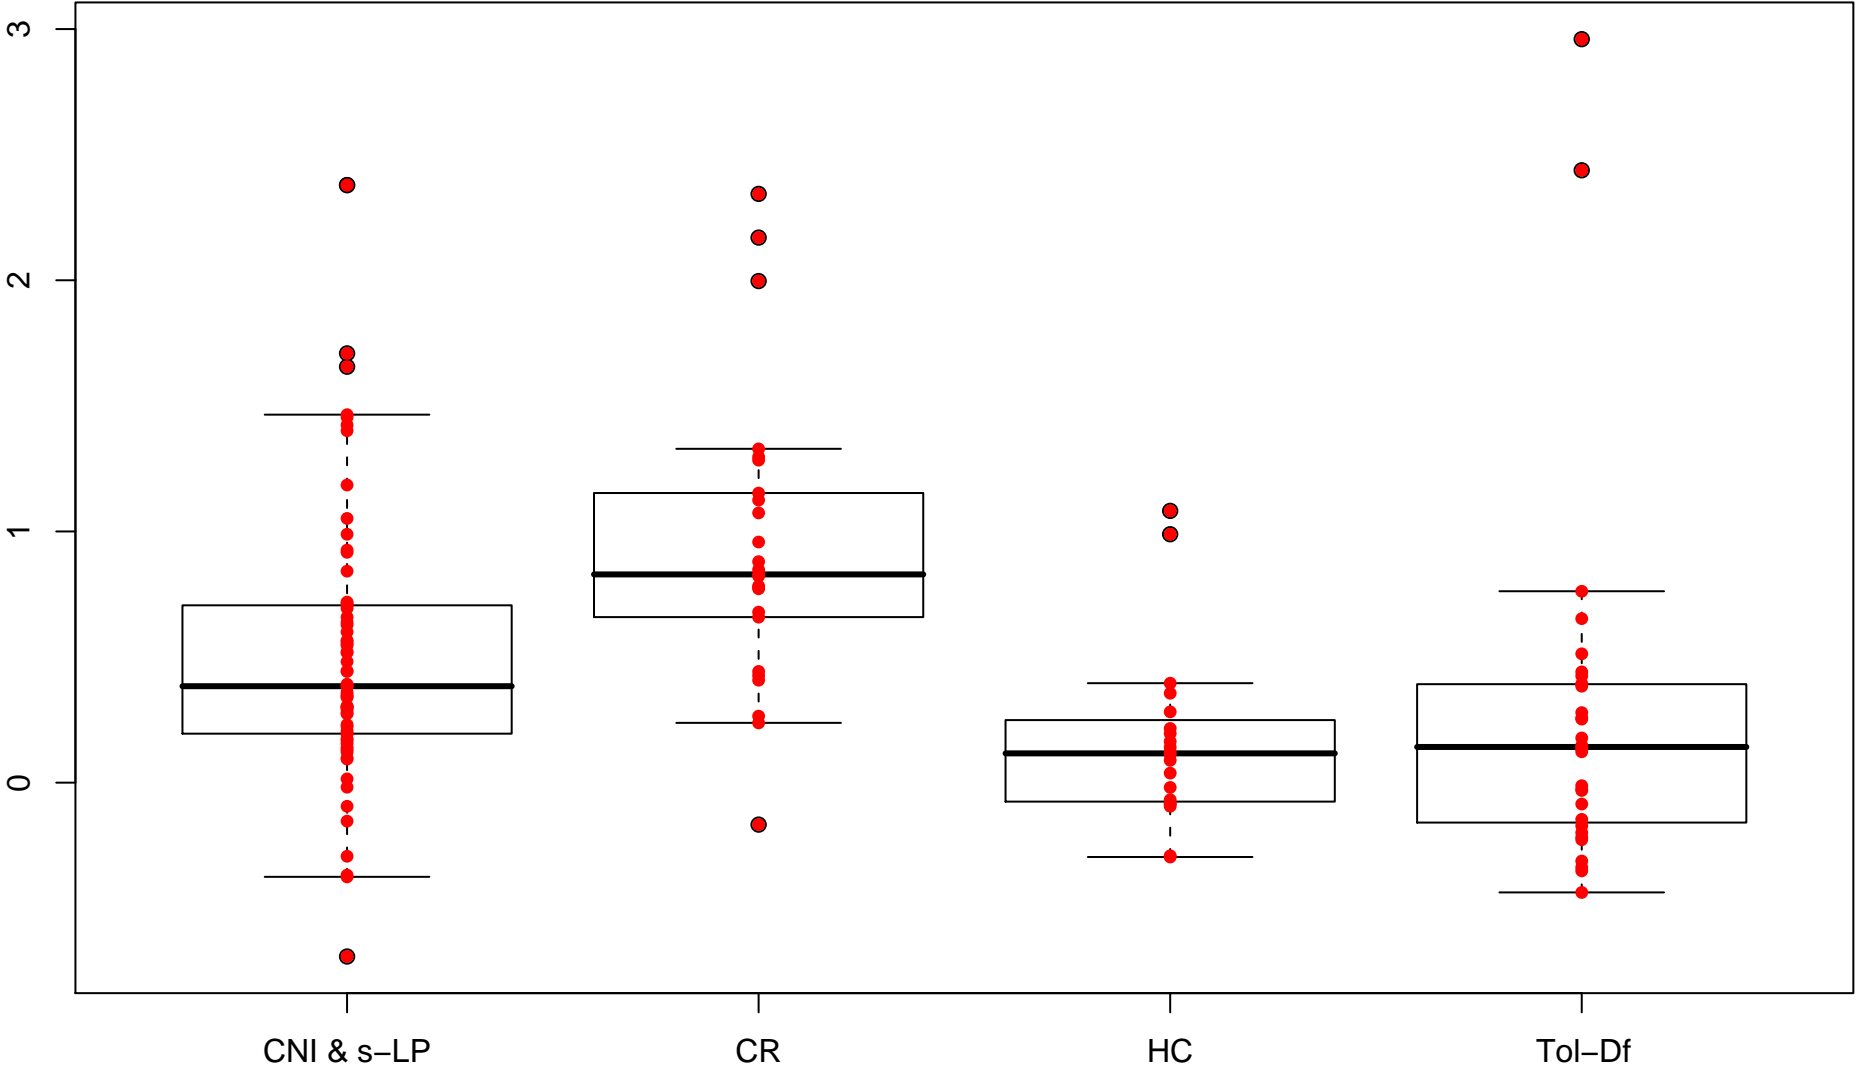

Rank 65 : LHFPL2  
1.319e-07

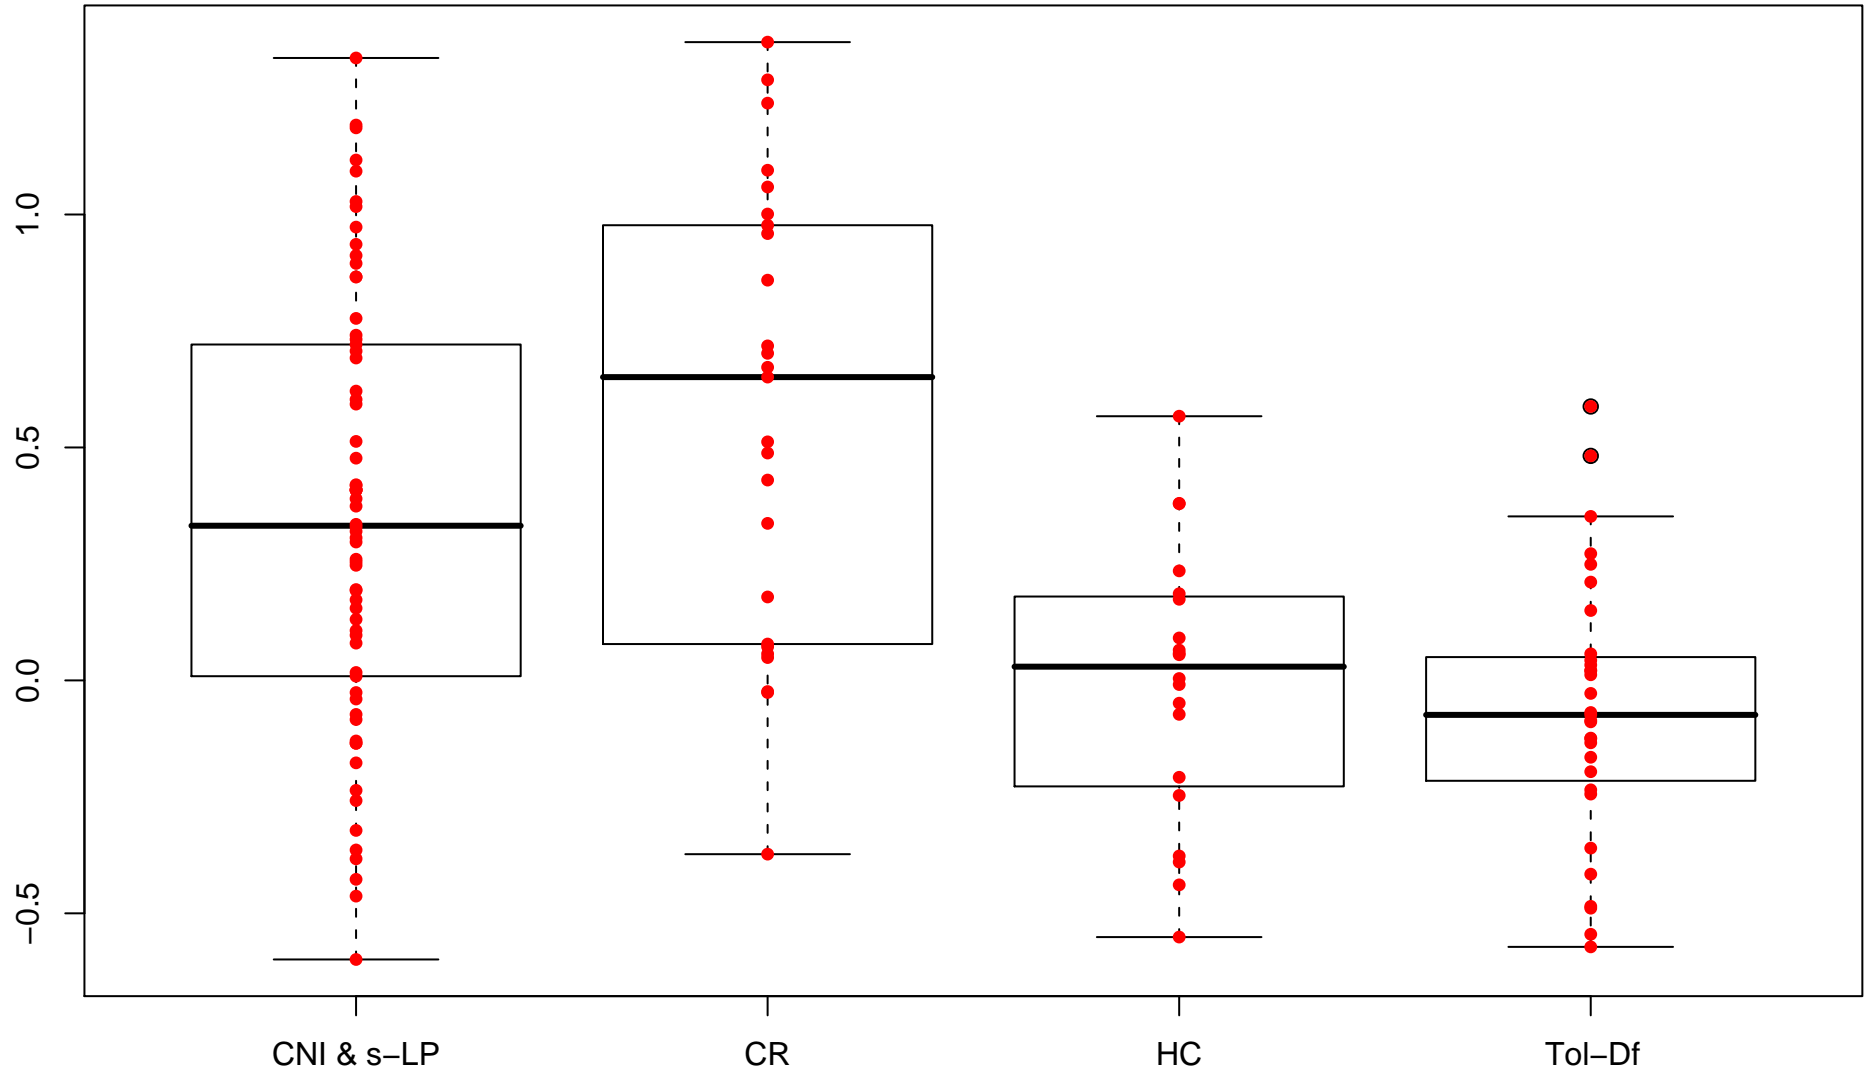

Rank 66 : SPTLC2  
1.3632e-07

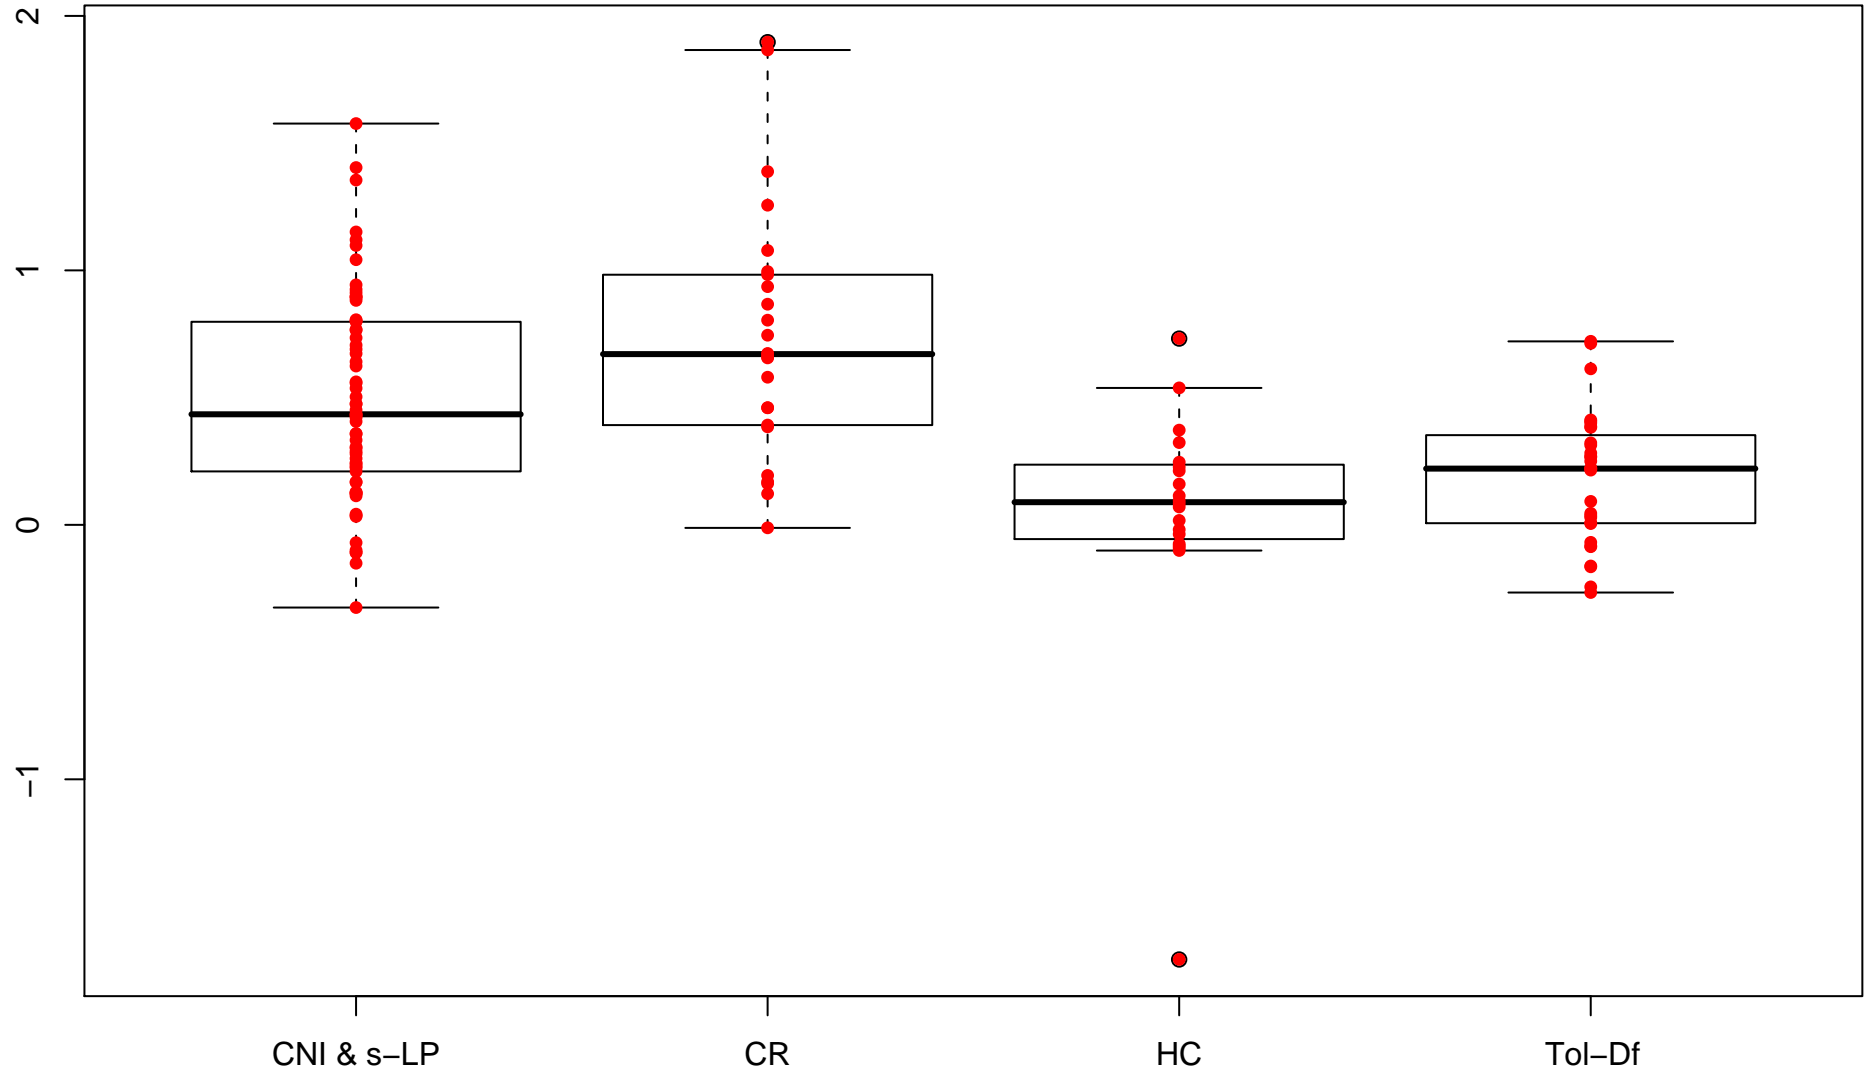

Rank 67 : IKZF2  
1.5457e-07

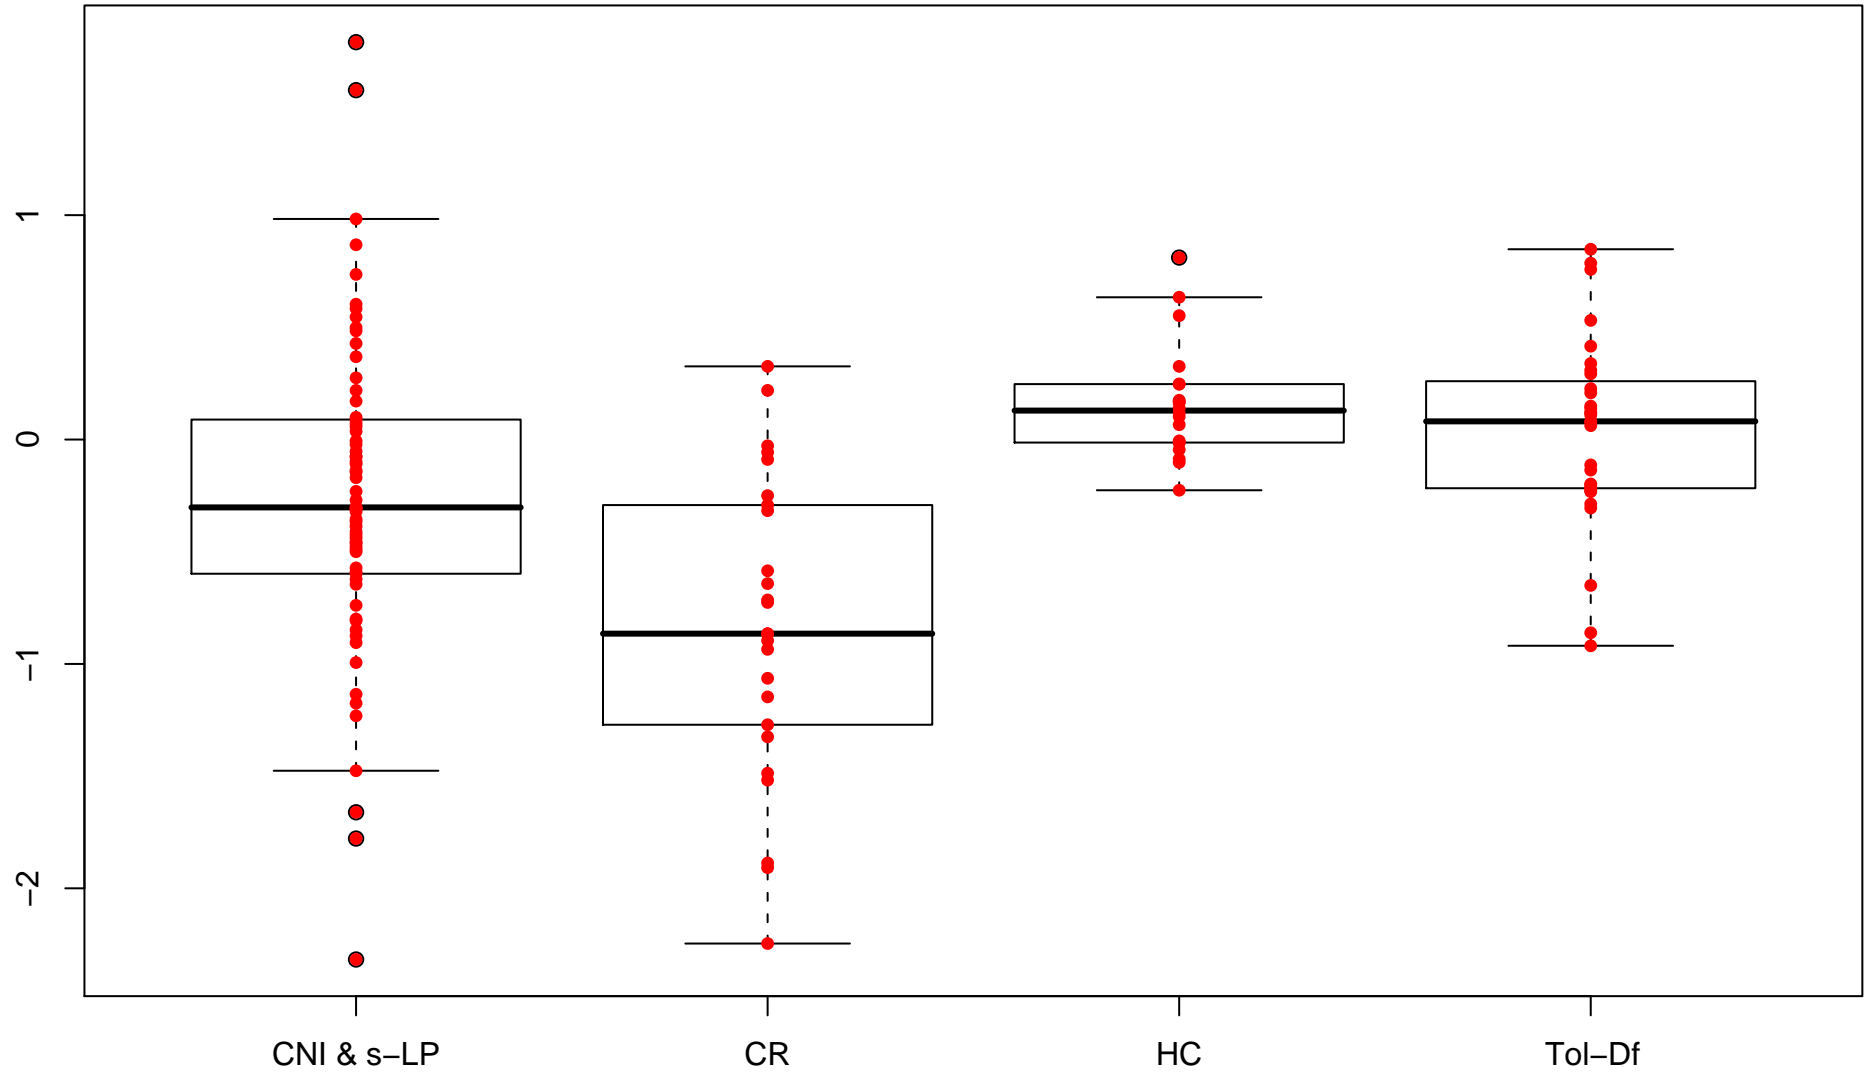

Rank 68 : DPP4  
1.5835e-07

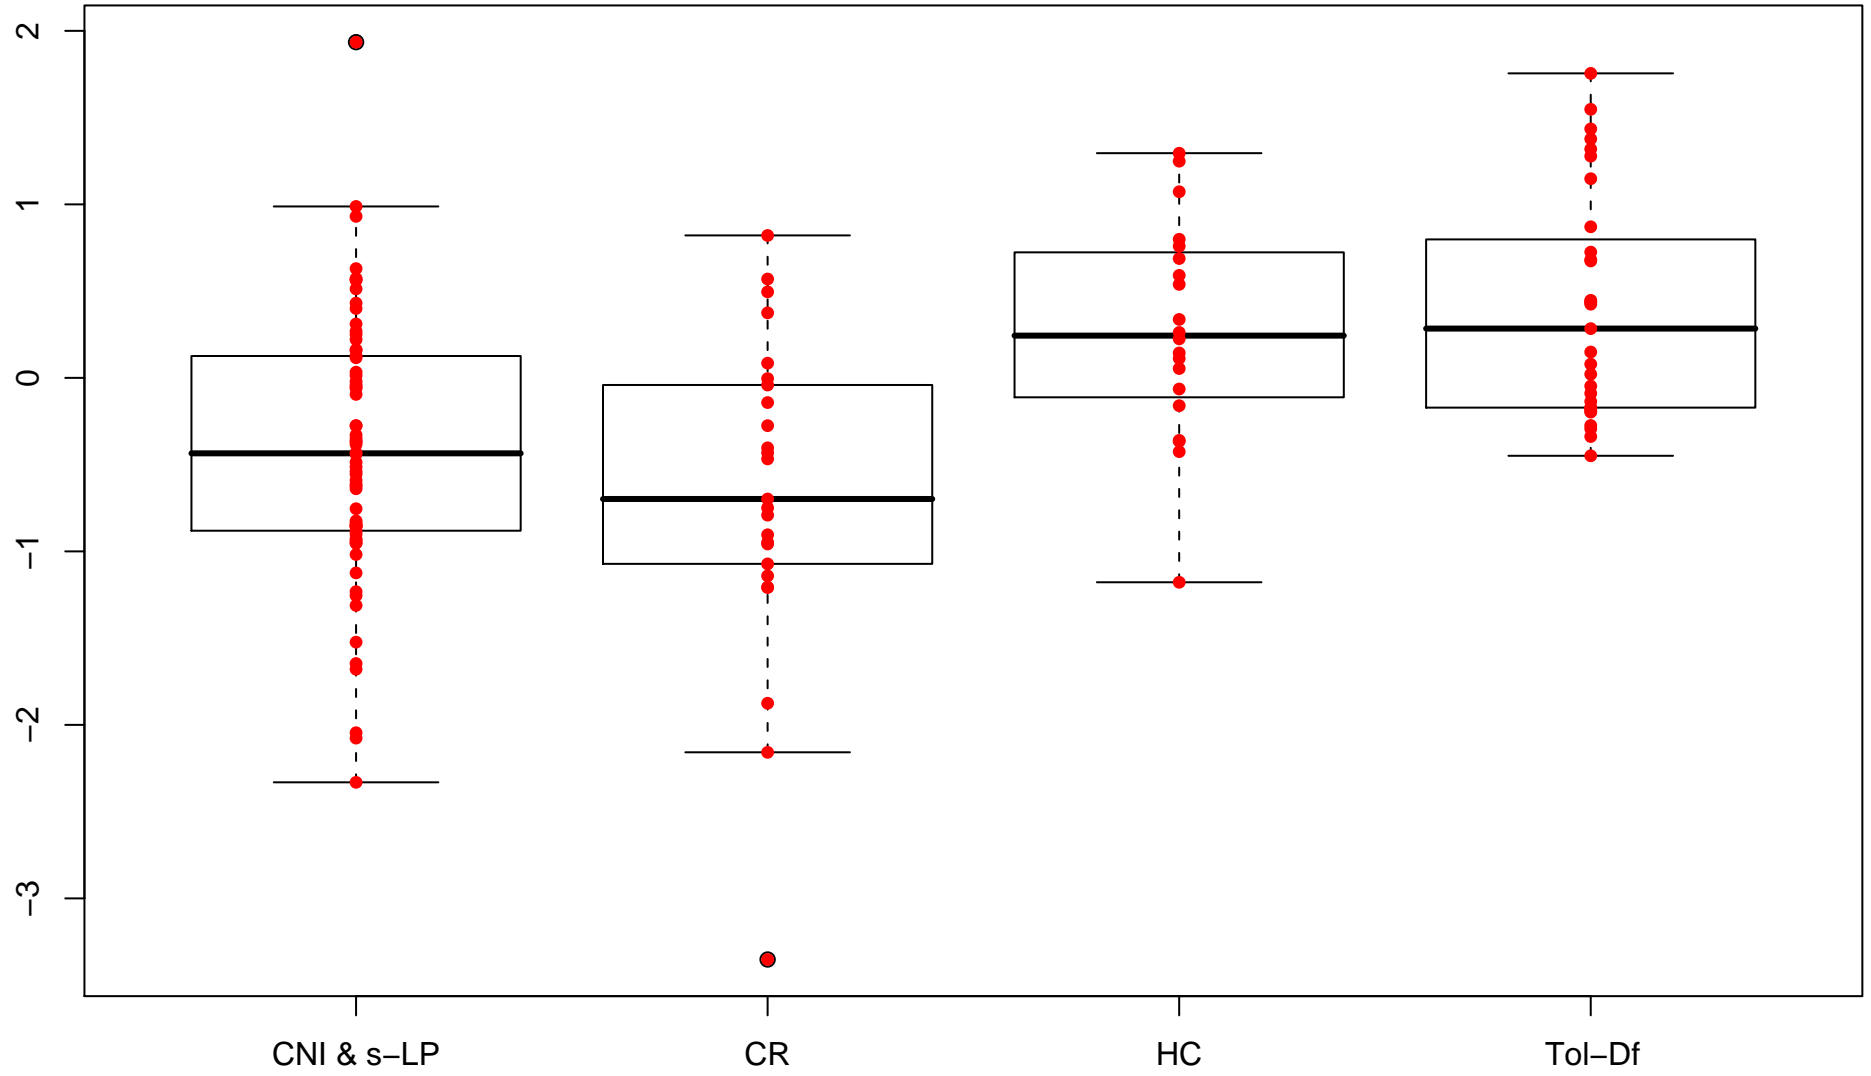

Rank 69 : KLRB1  
1.6148e-07

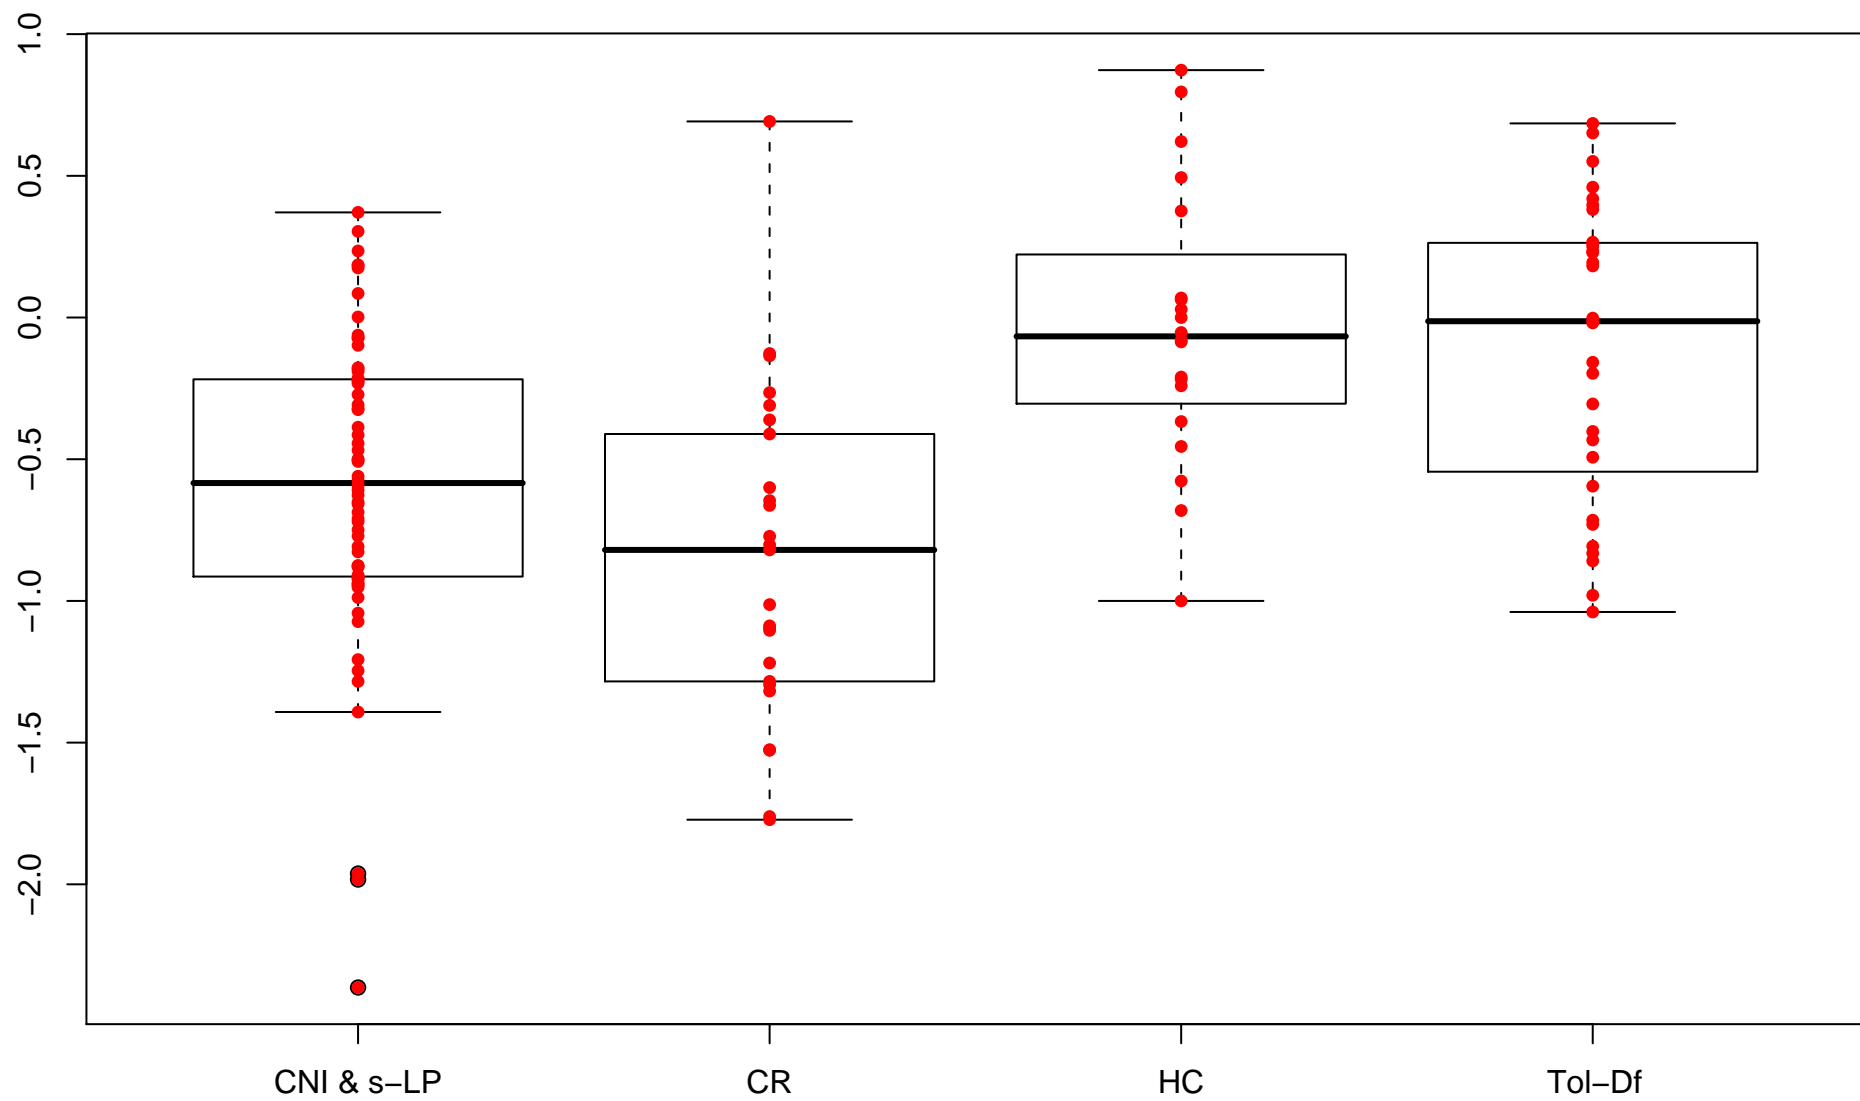

Rank 70 : IL2RA  
1.7285e-07

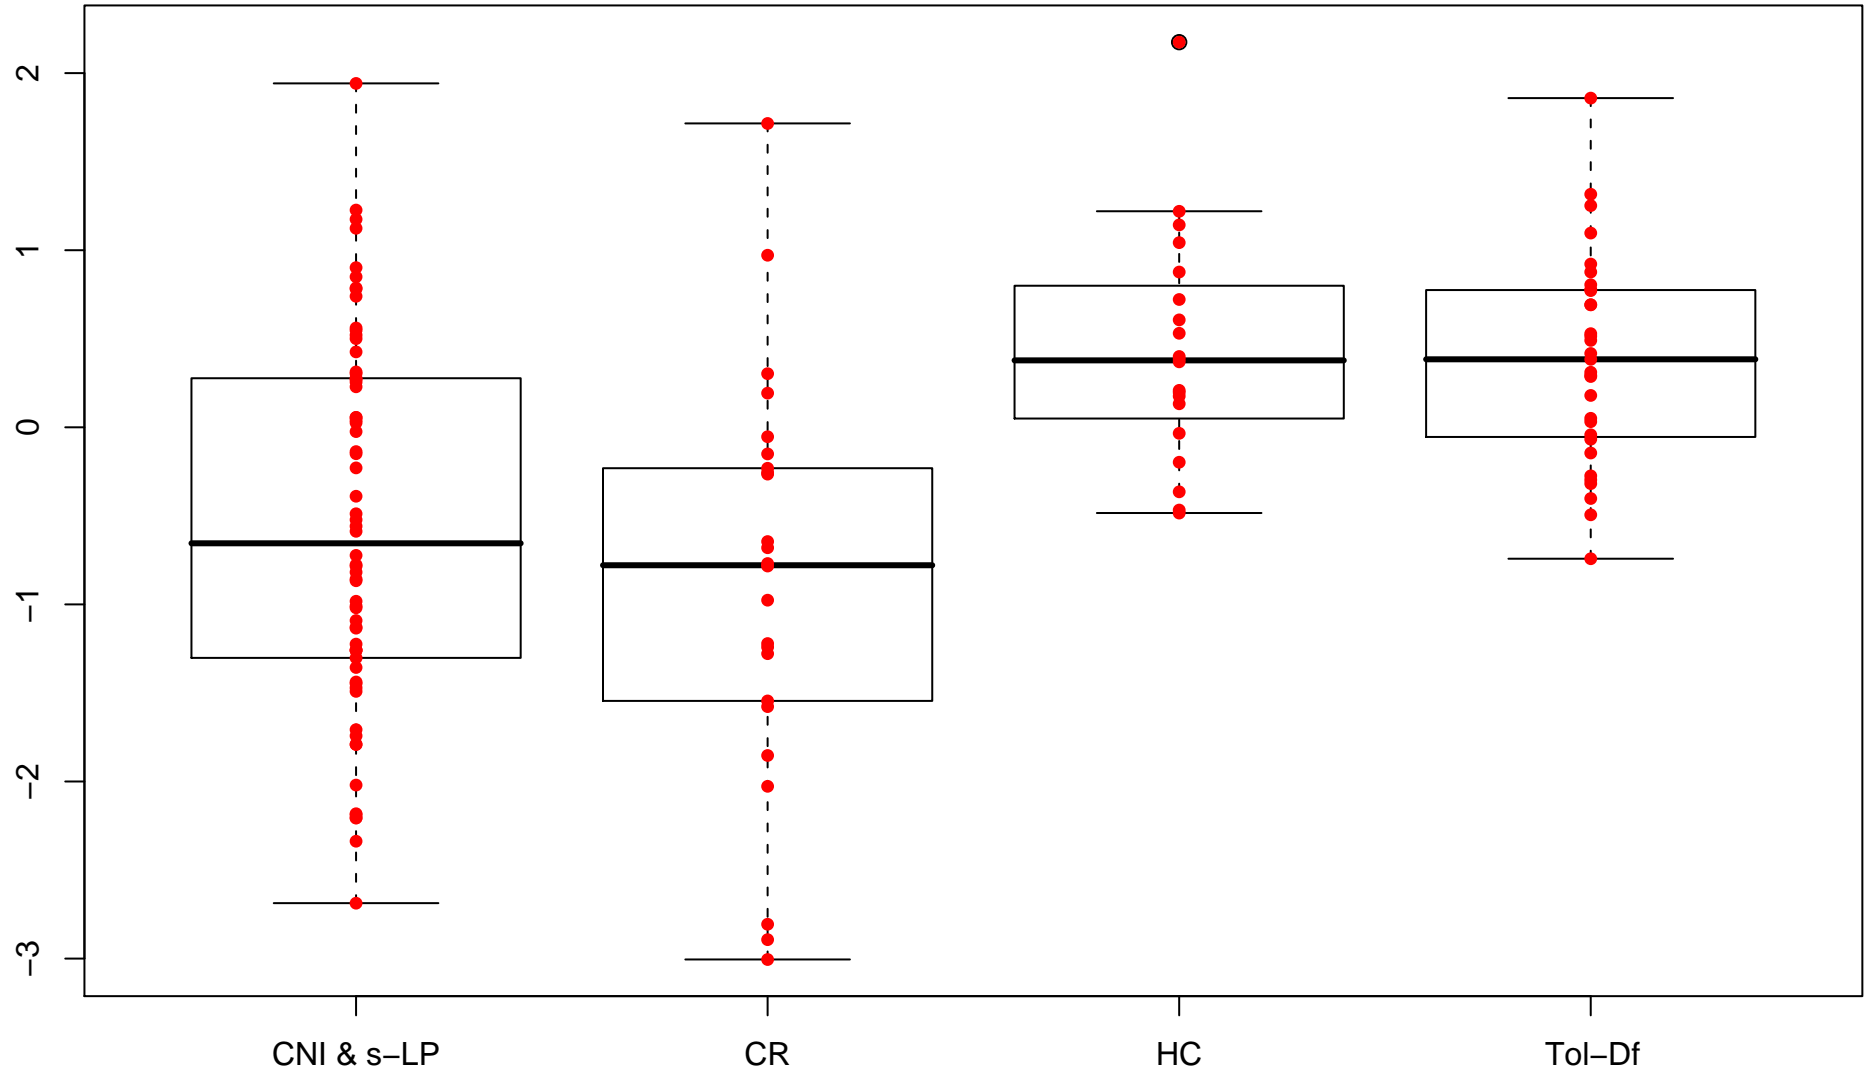

Rank 71 : SPTA1  
1.7982e-07

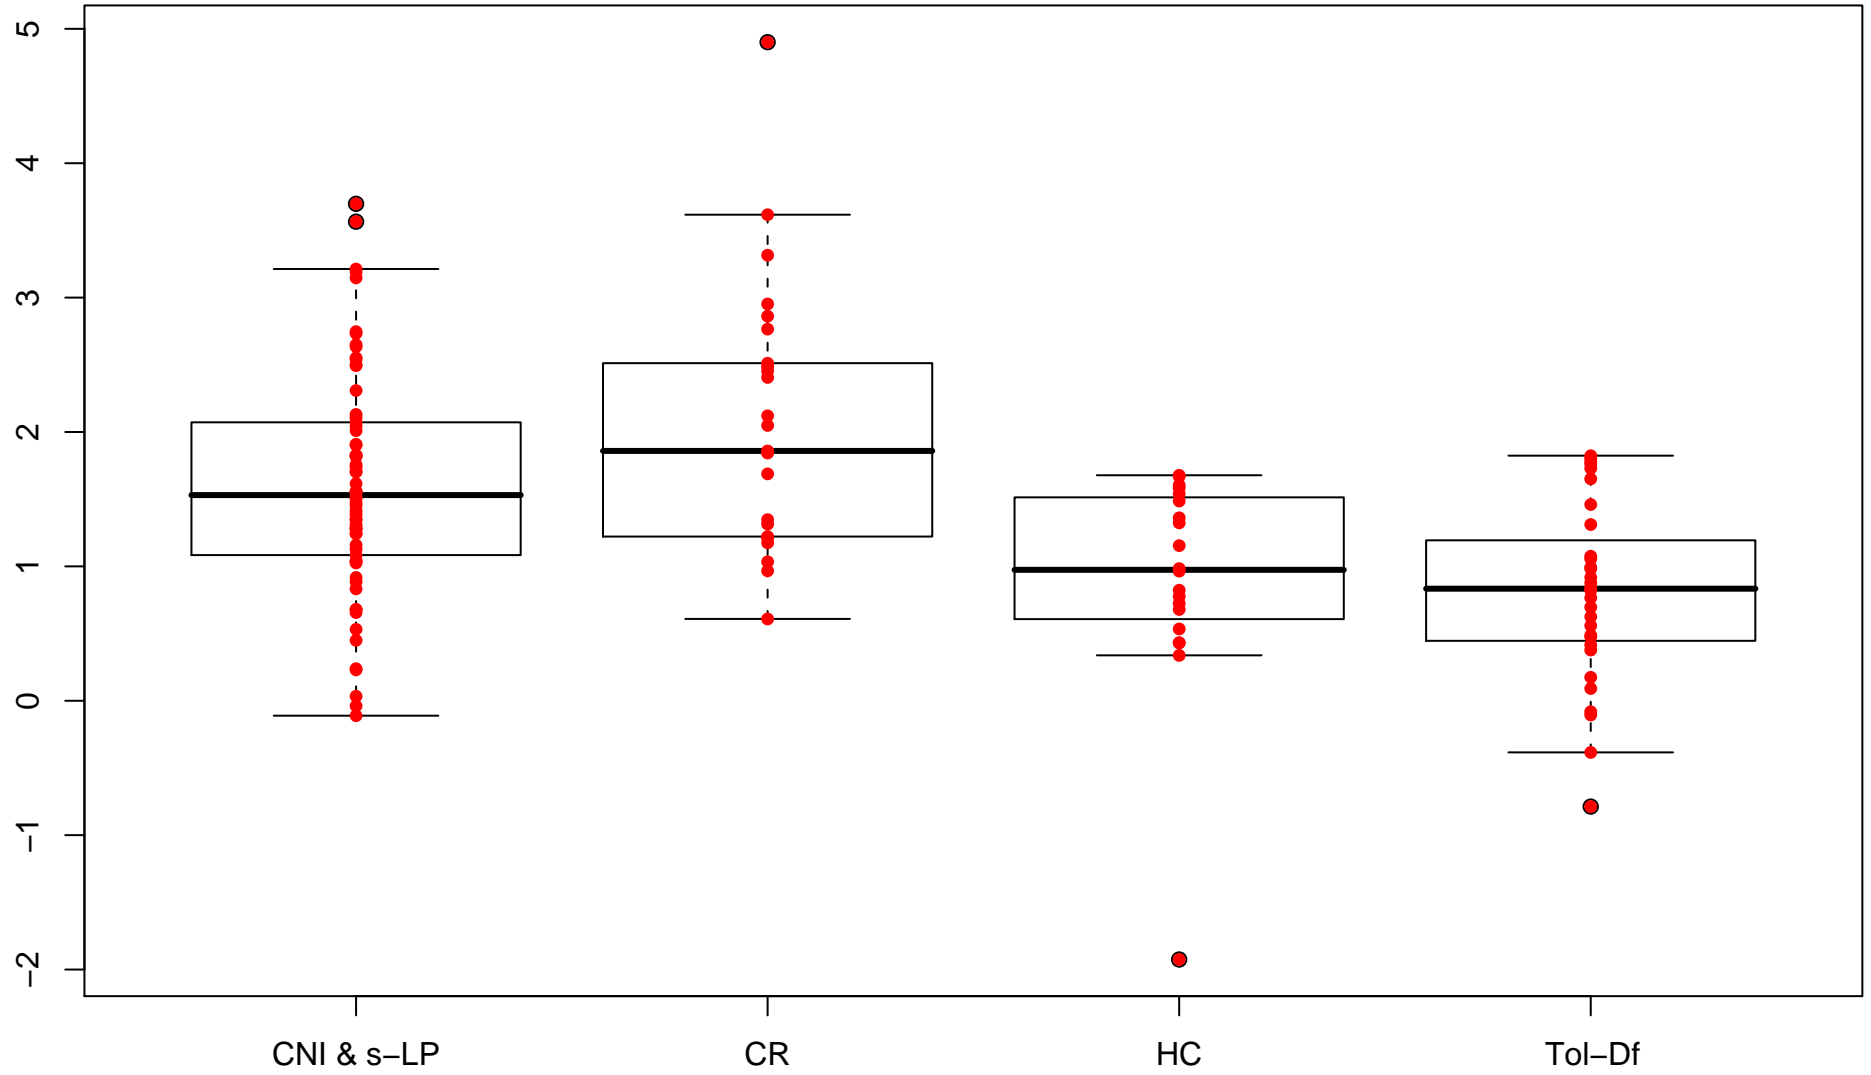



Rank 72 : AK129547  
1.8401e-07

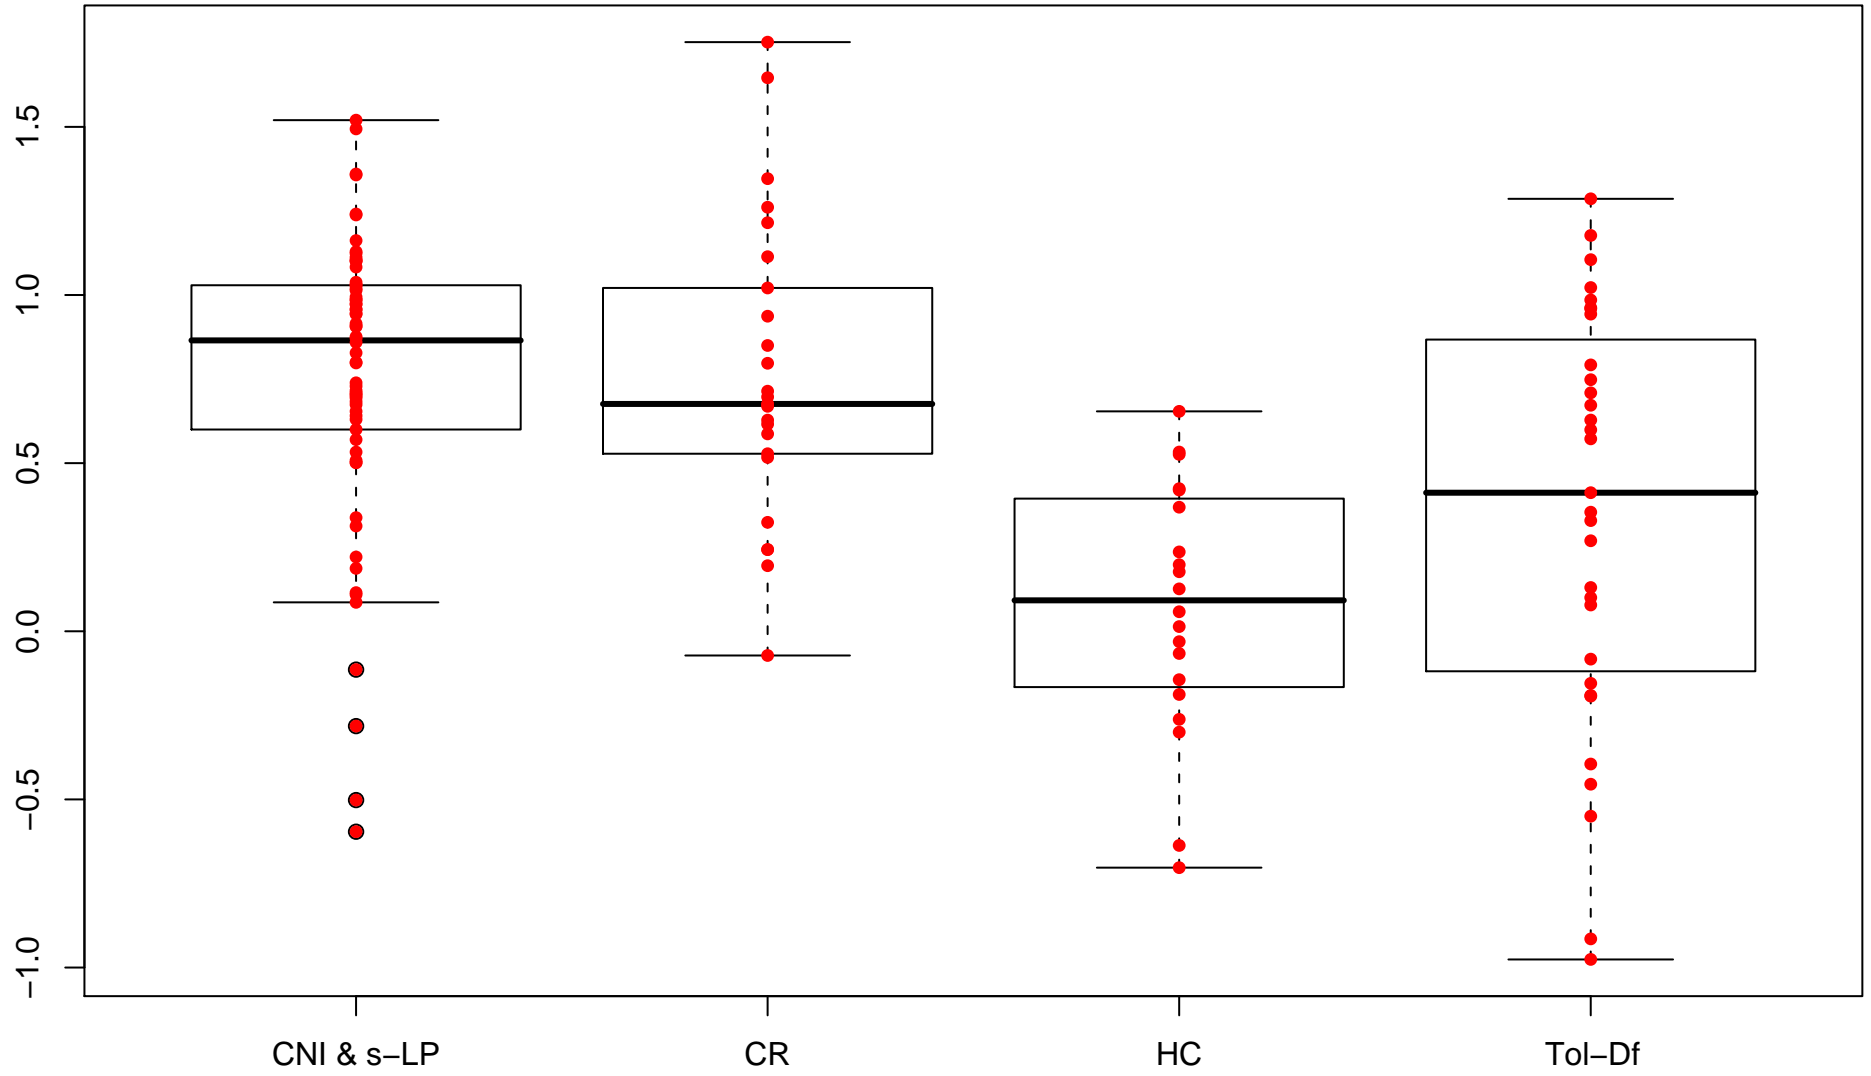

Rank 73 : FCER2  
1.8989e-07

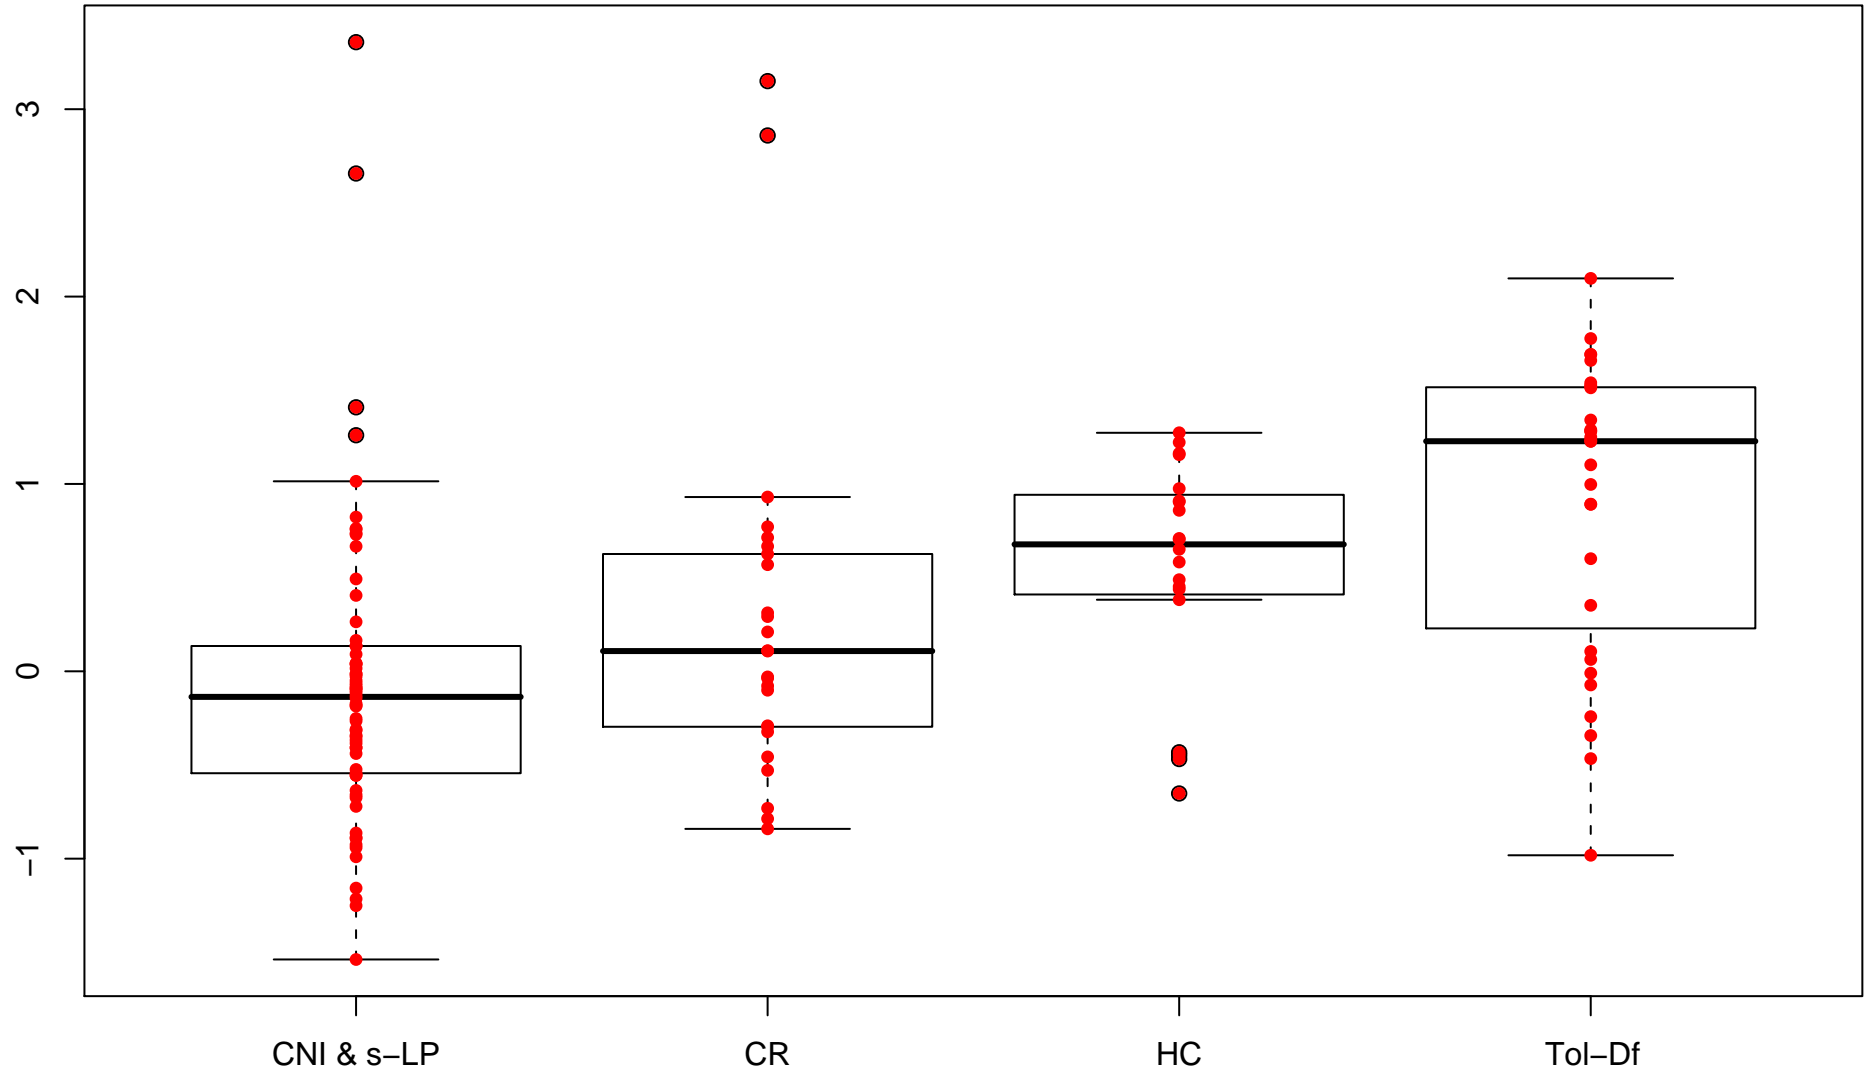

Rank 74 : HLA-DOA  
1.9692e-07

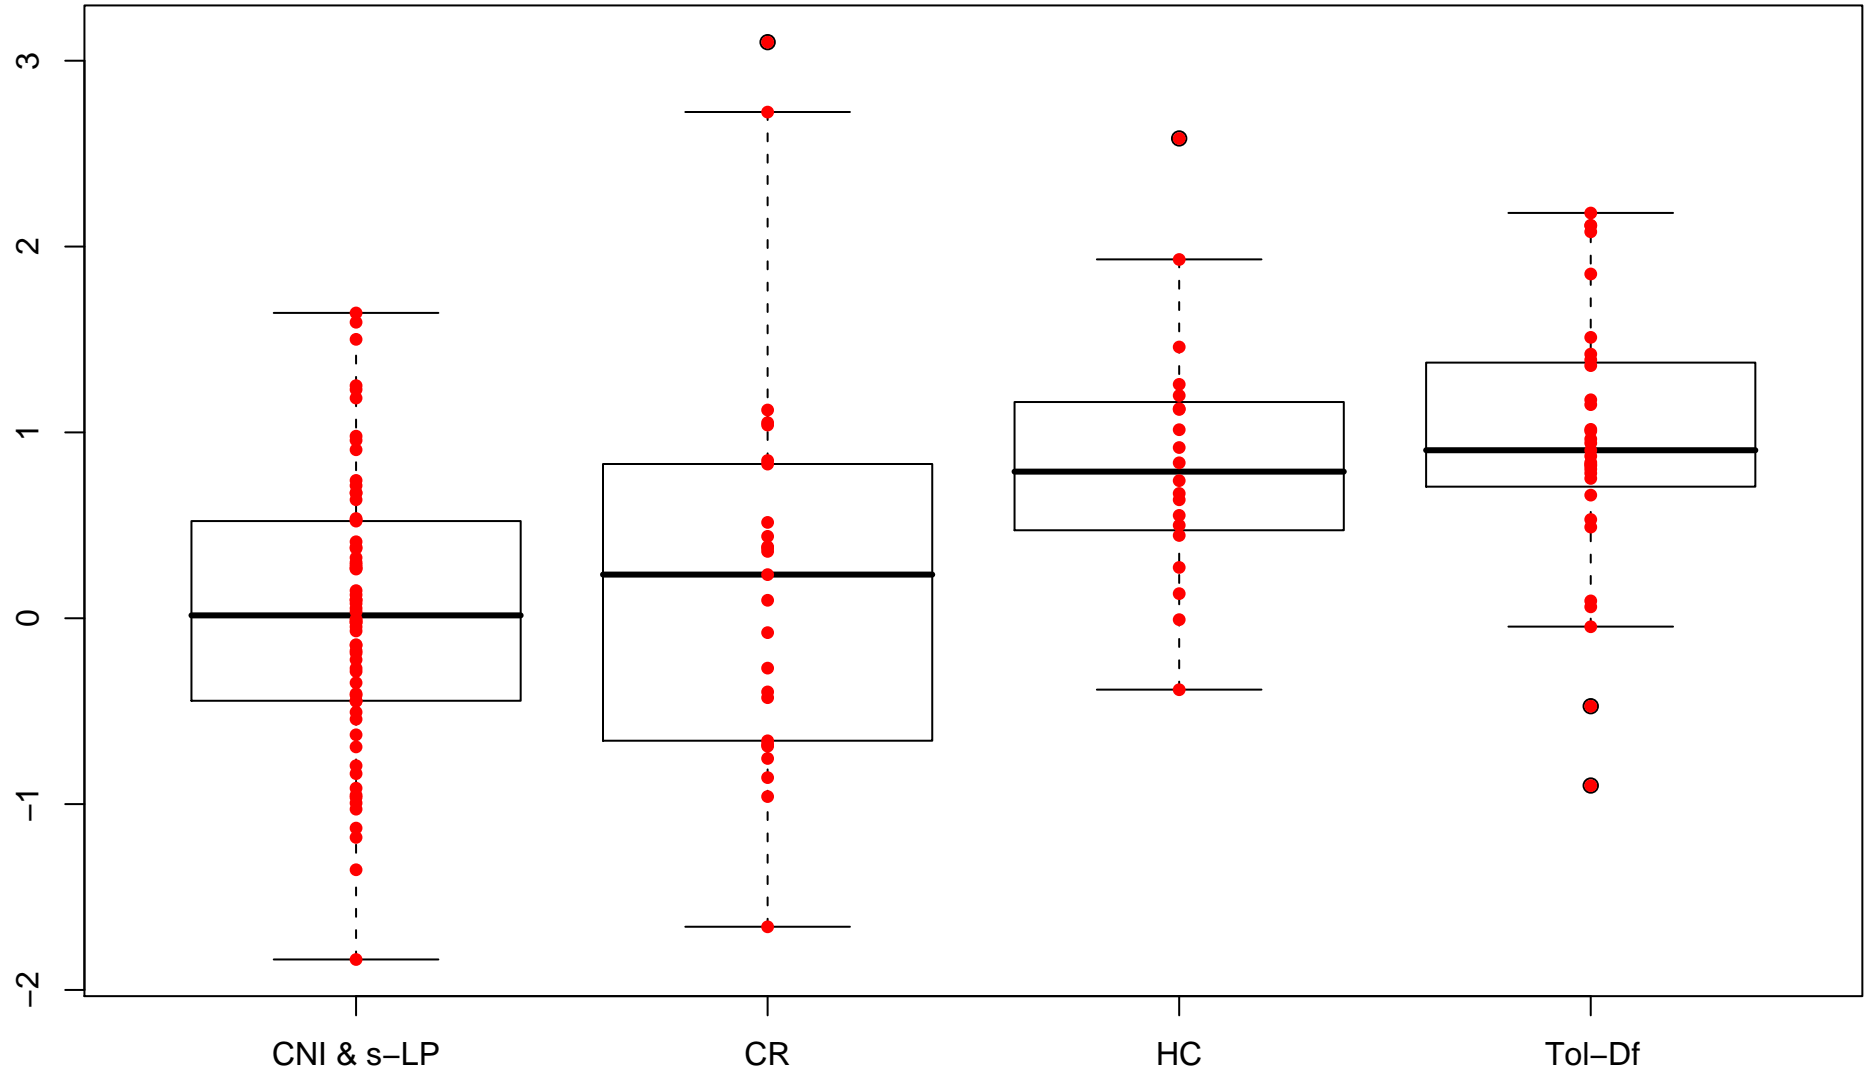

Rank 75 : SWAP70  
1.9974e-07

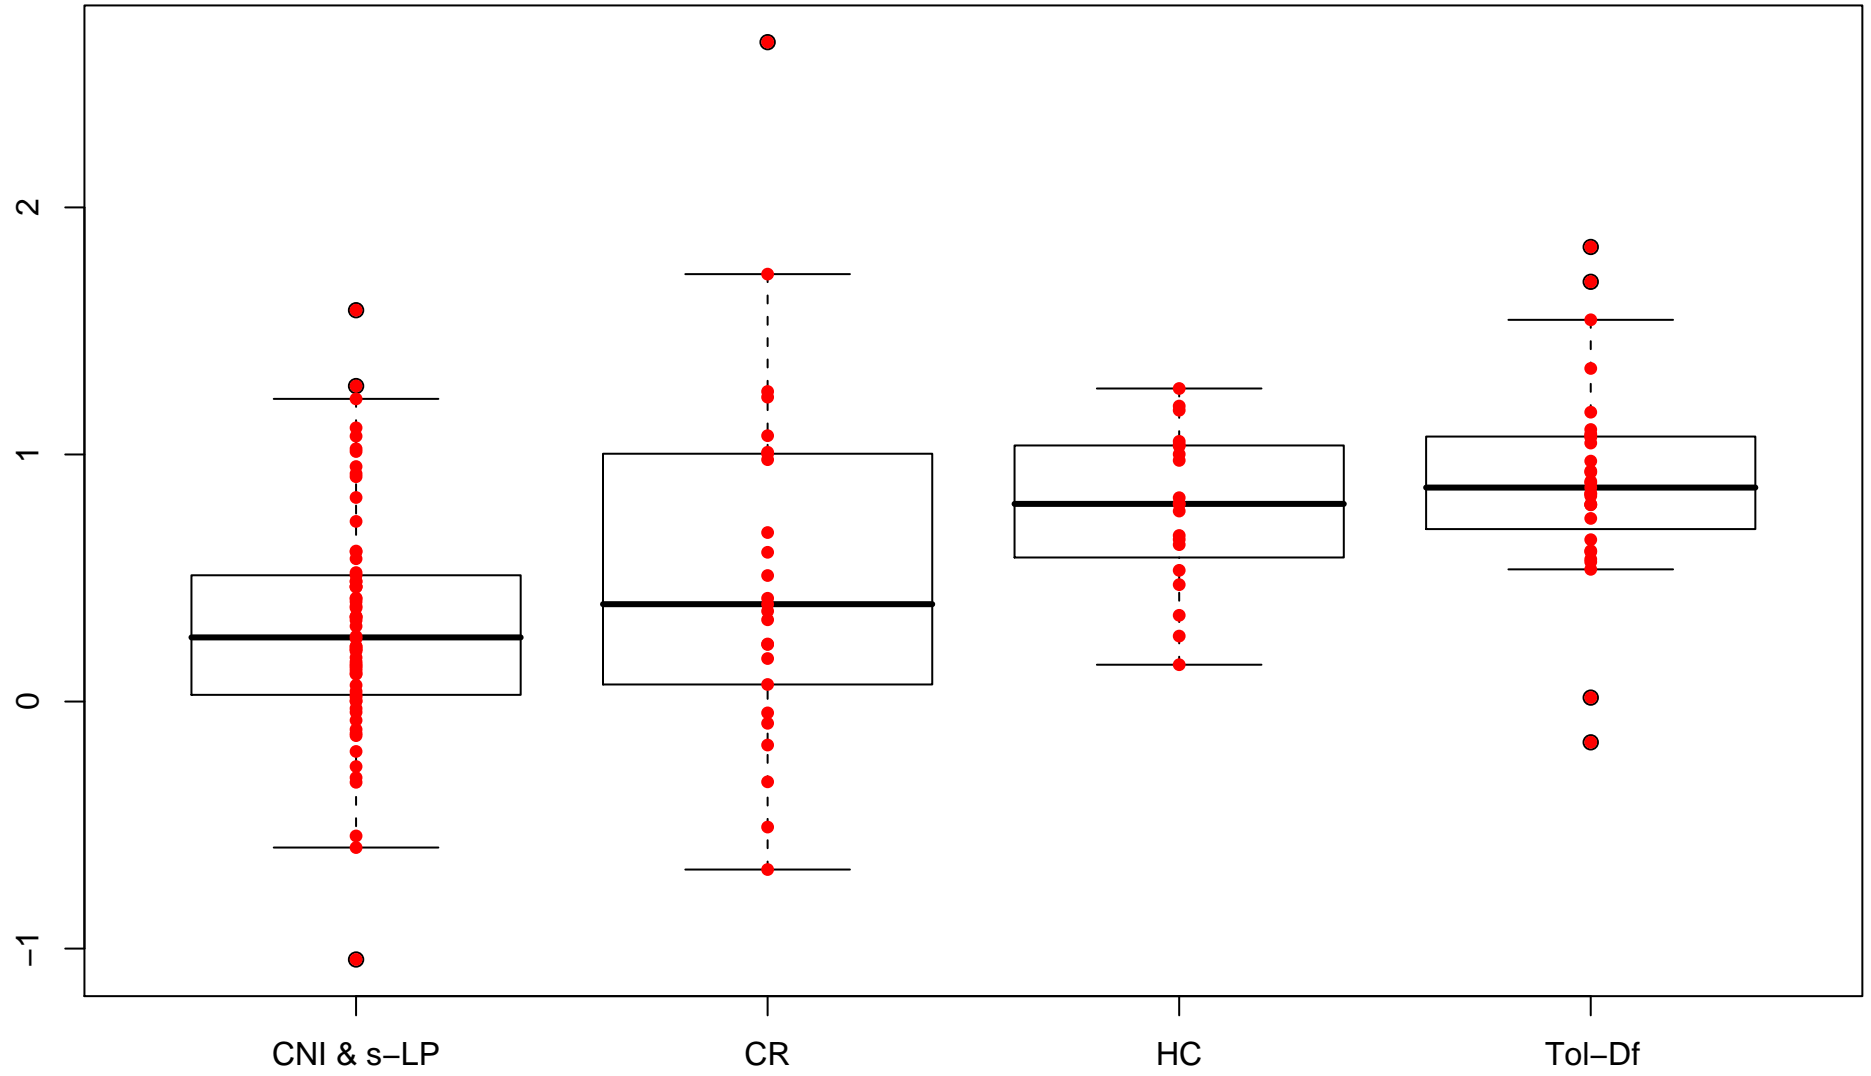

Rank 76 : PLEKHA1  
2.0927e-07

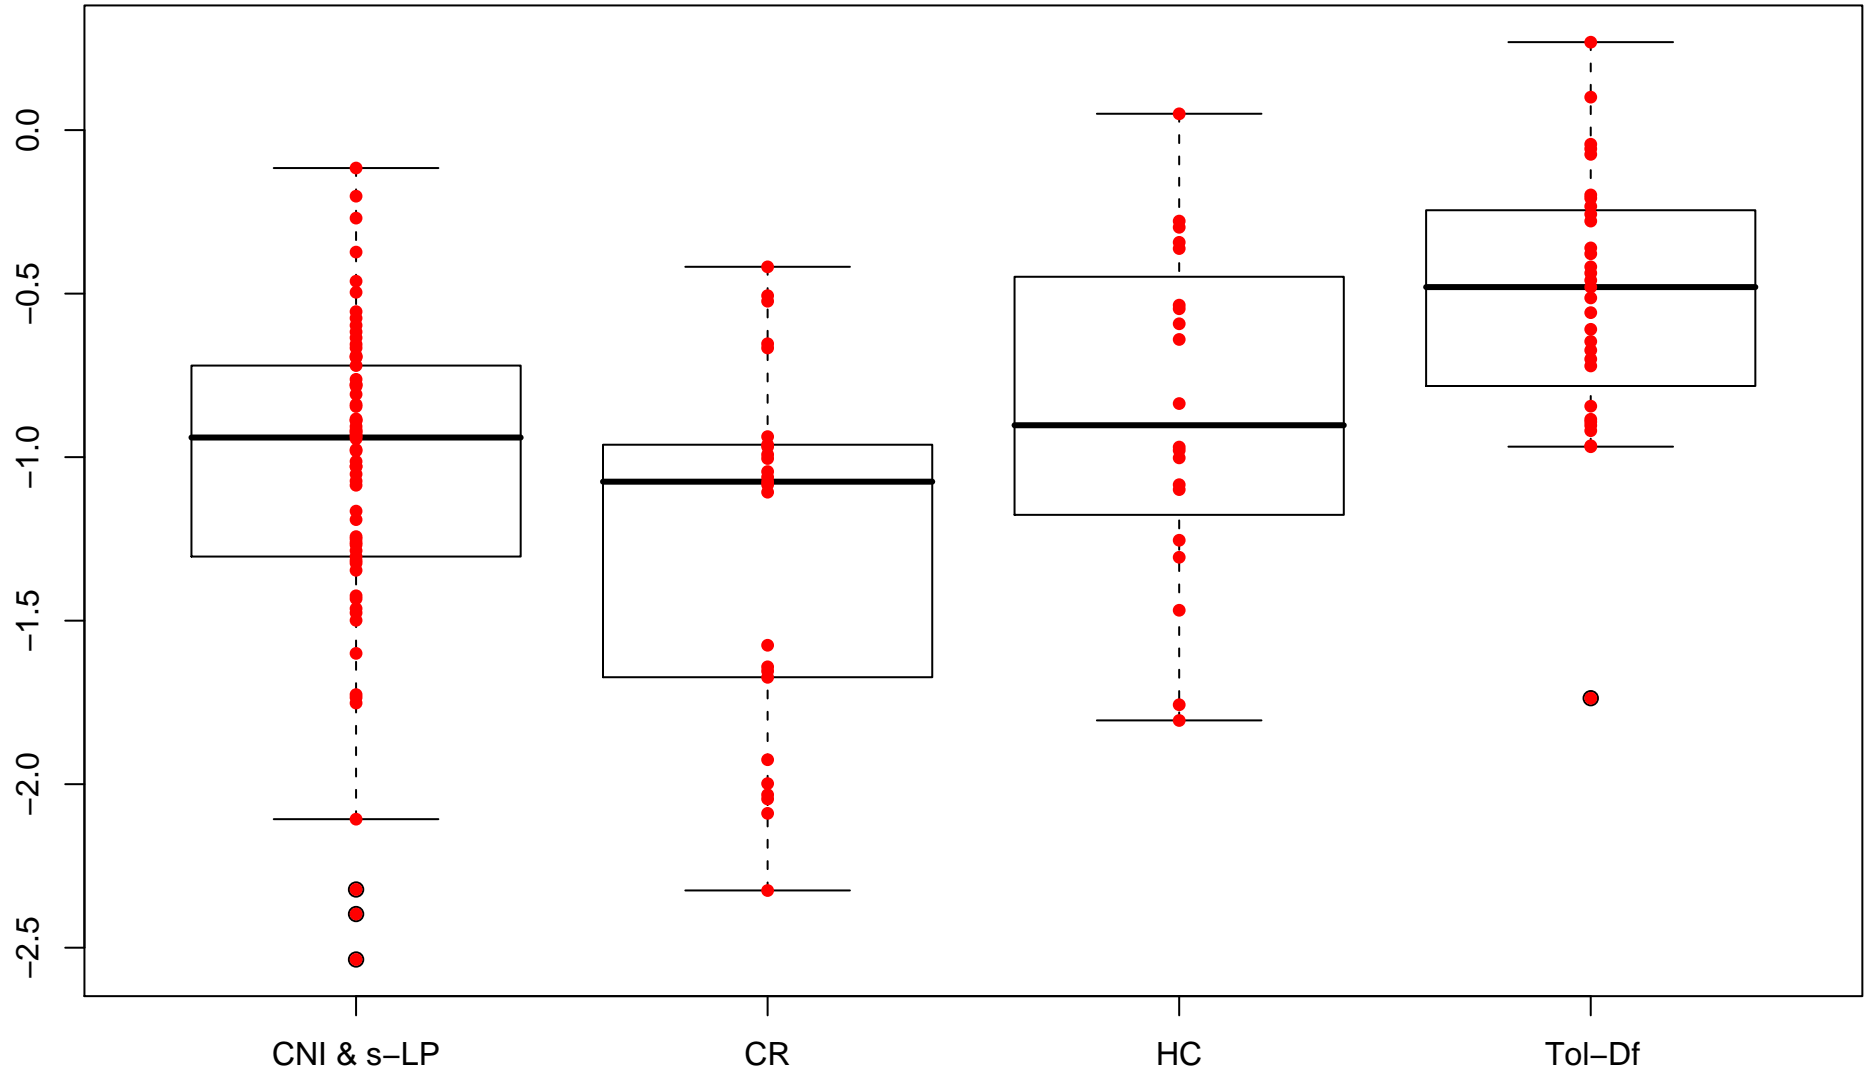

Rank 77 : LDHB  
2.1606e-07

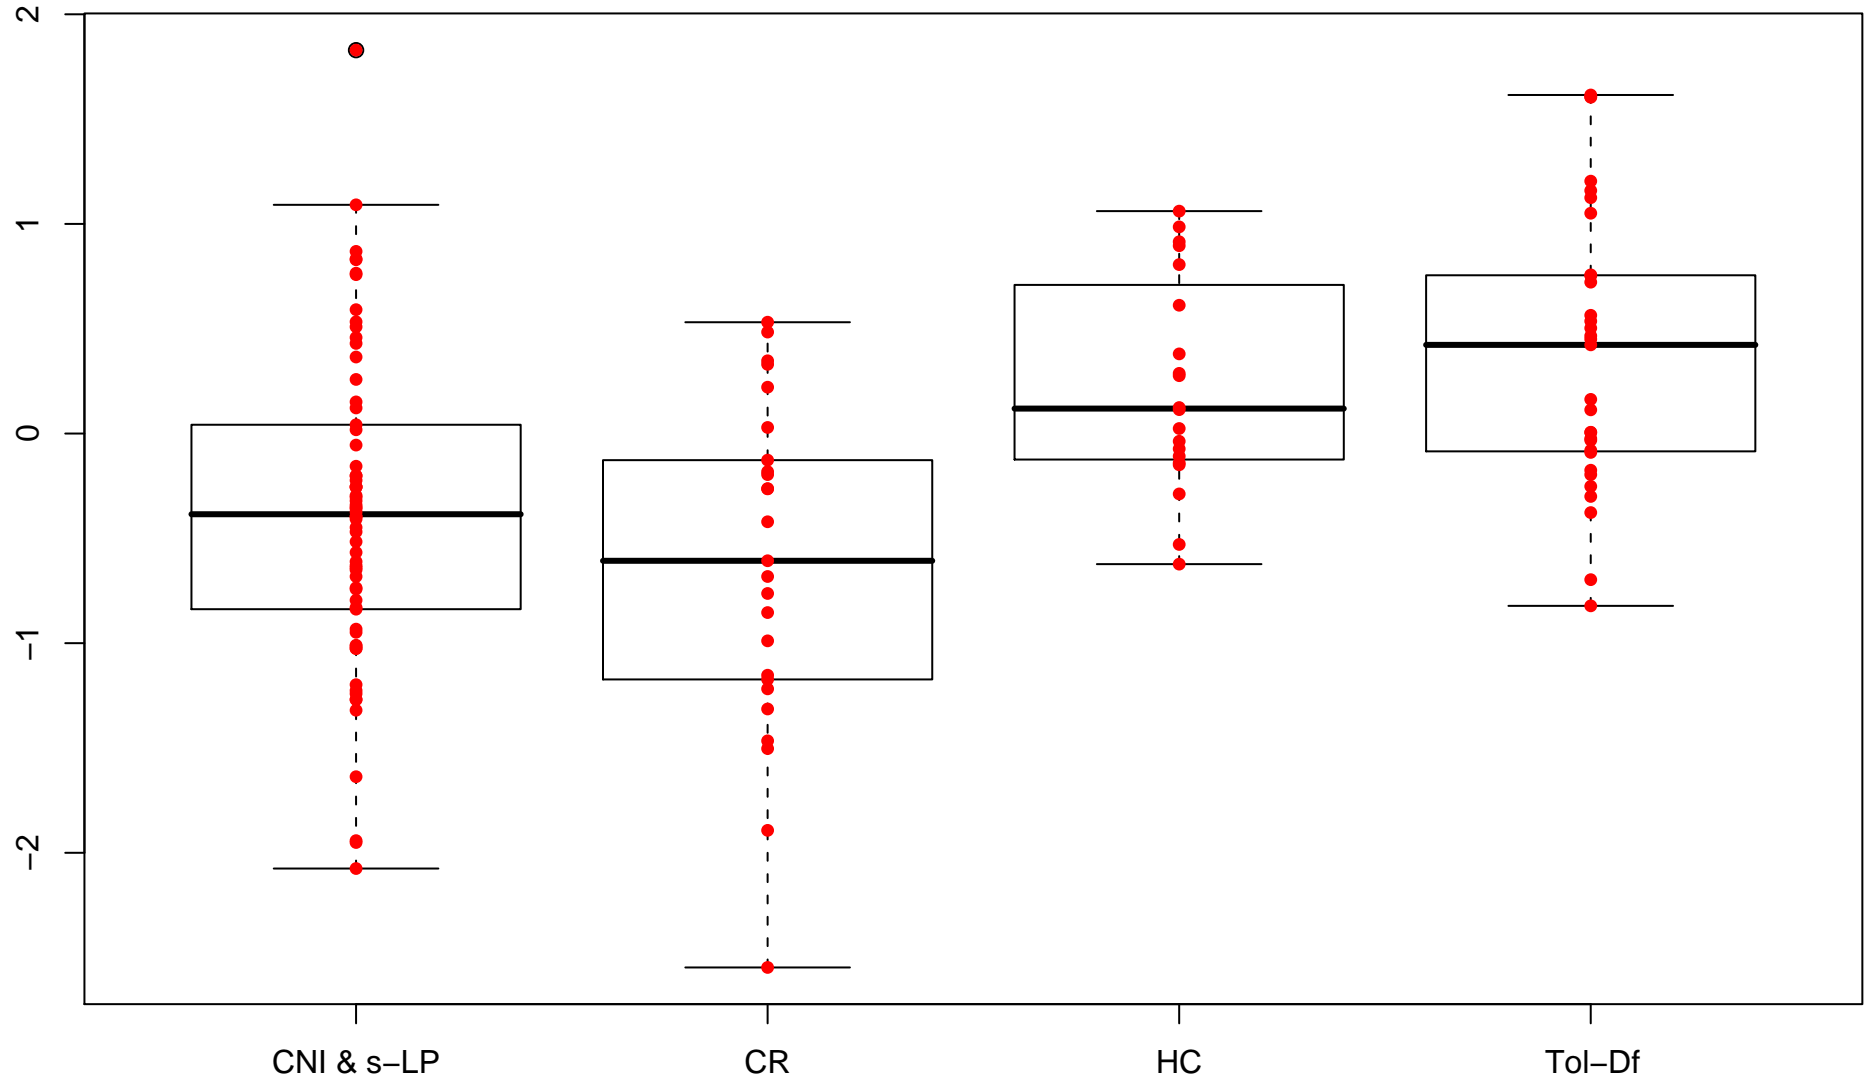

Rank 78 : TGDS  
2.2467e-07

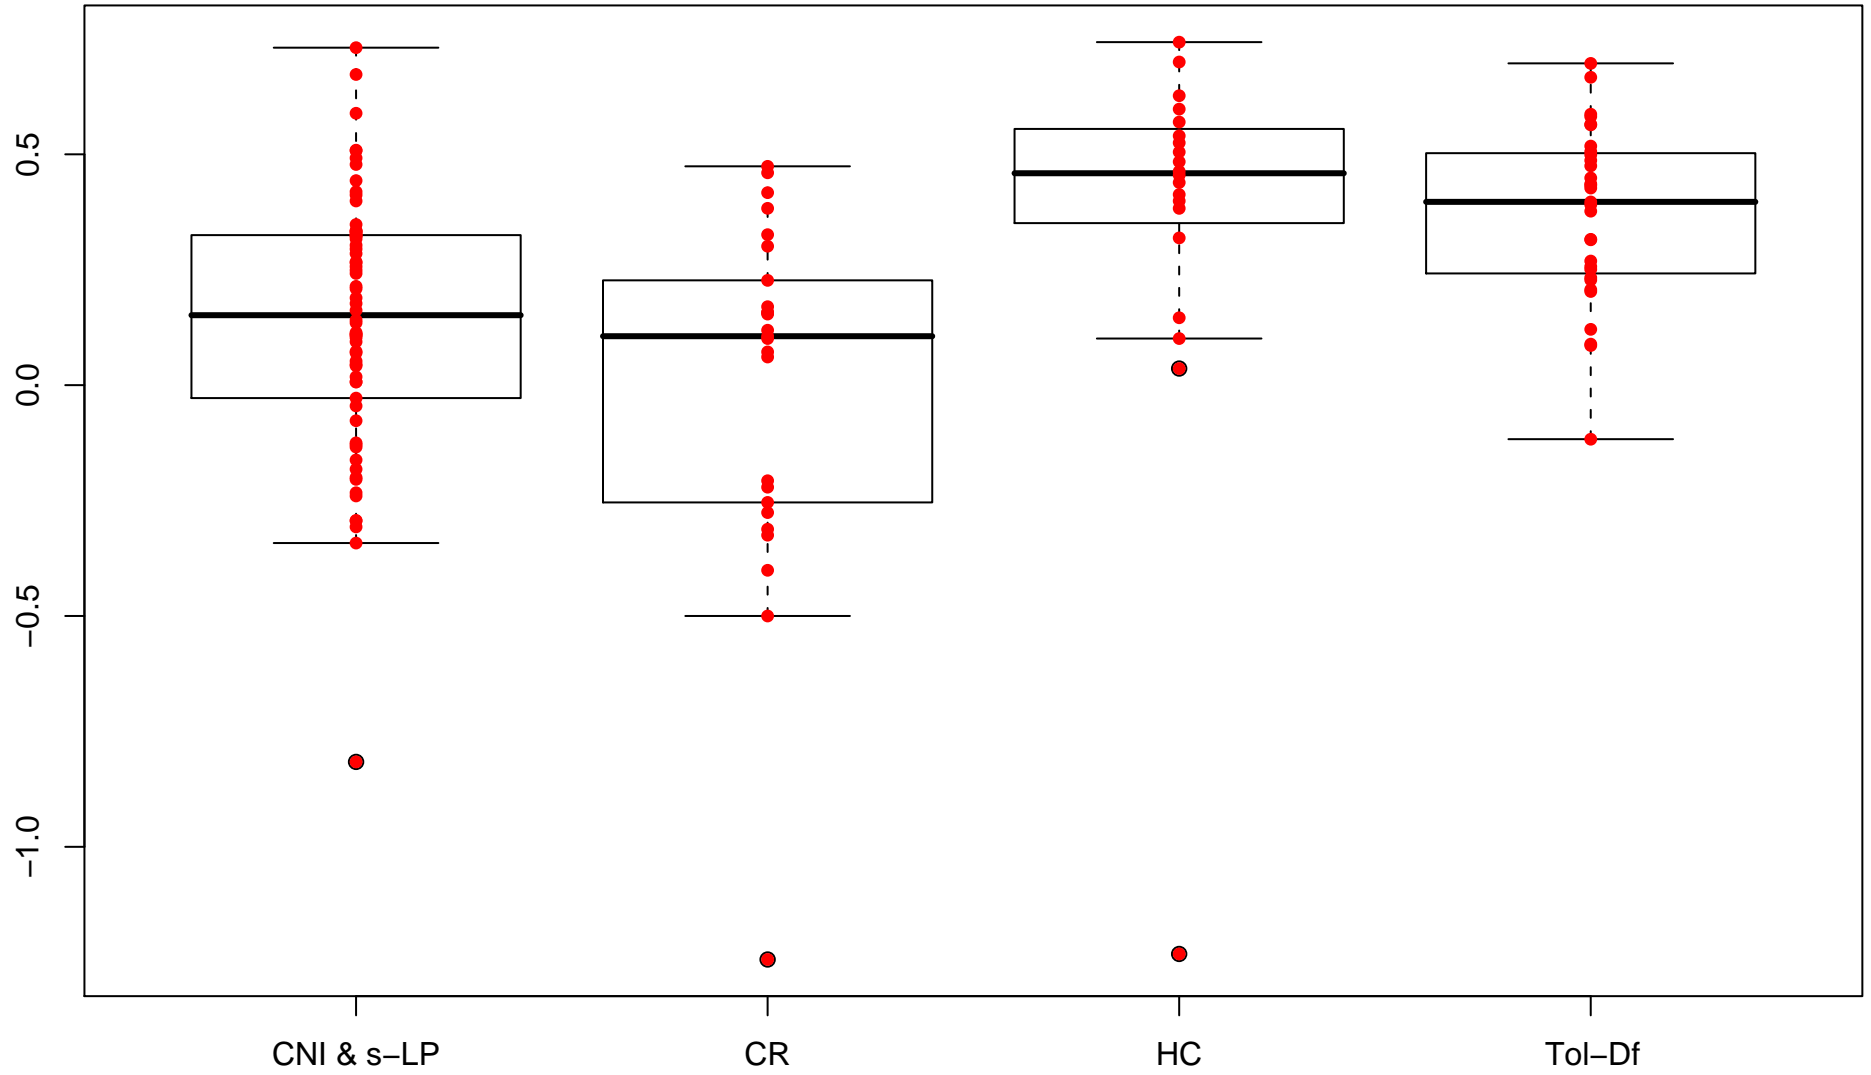

Rank 79 : RPS27  
2.3234e-07

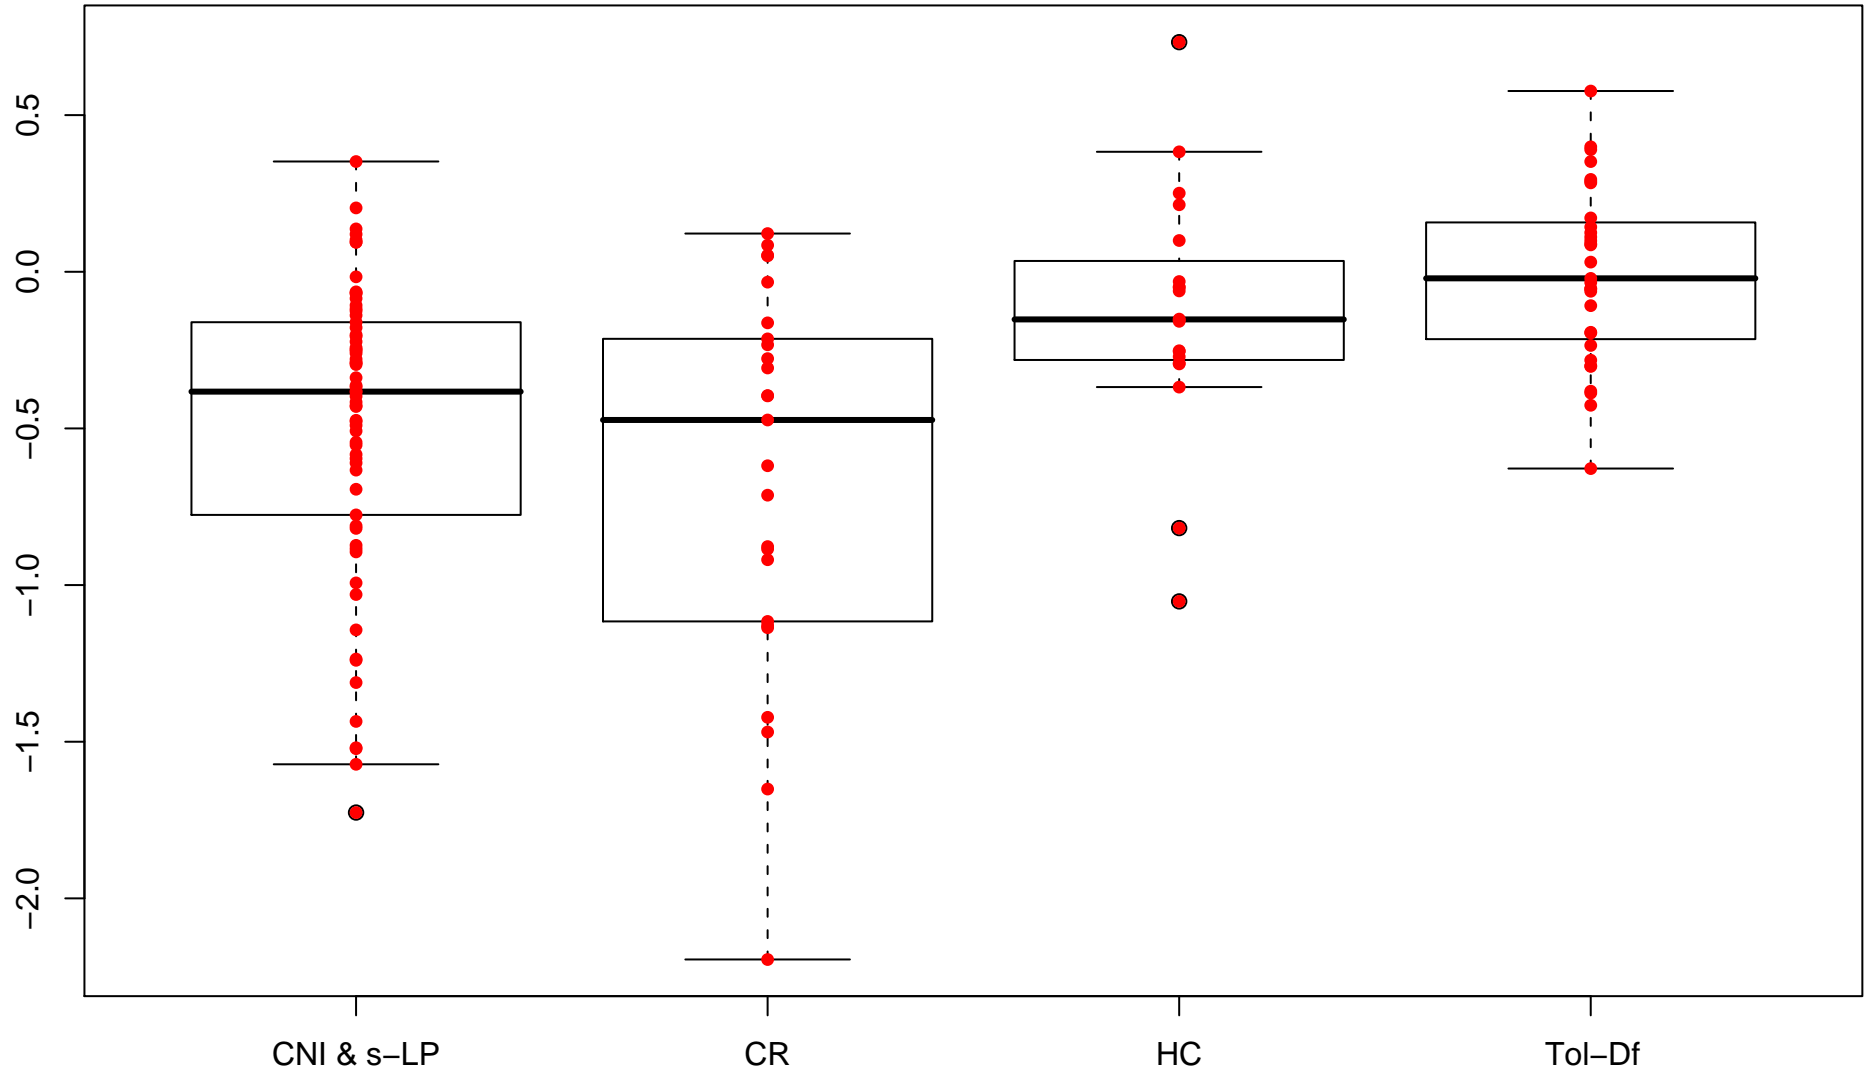



Rank 80 : TSPAN3  
2.328e-07

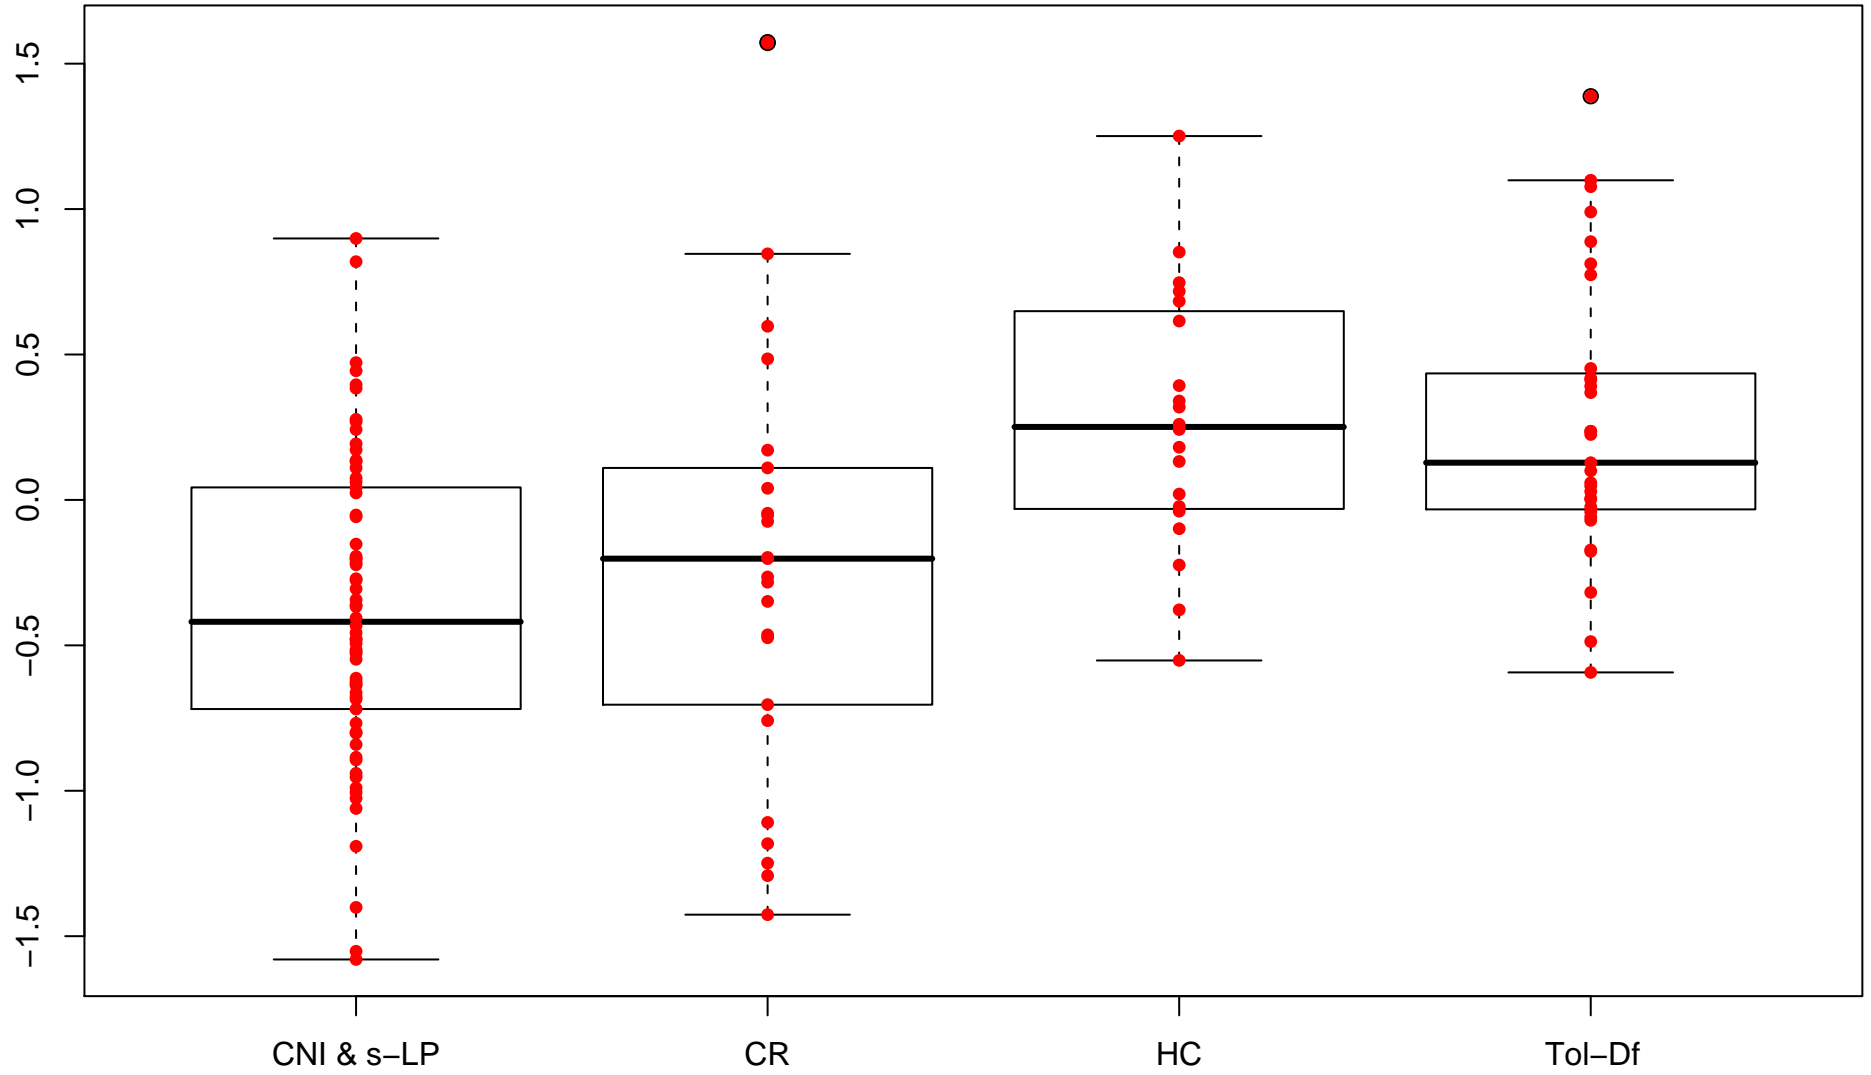

Rank 81 : IGLL1  
2.4308e-07

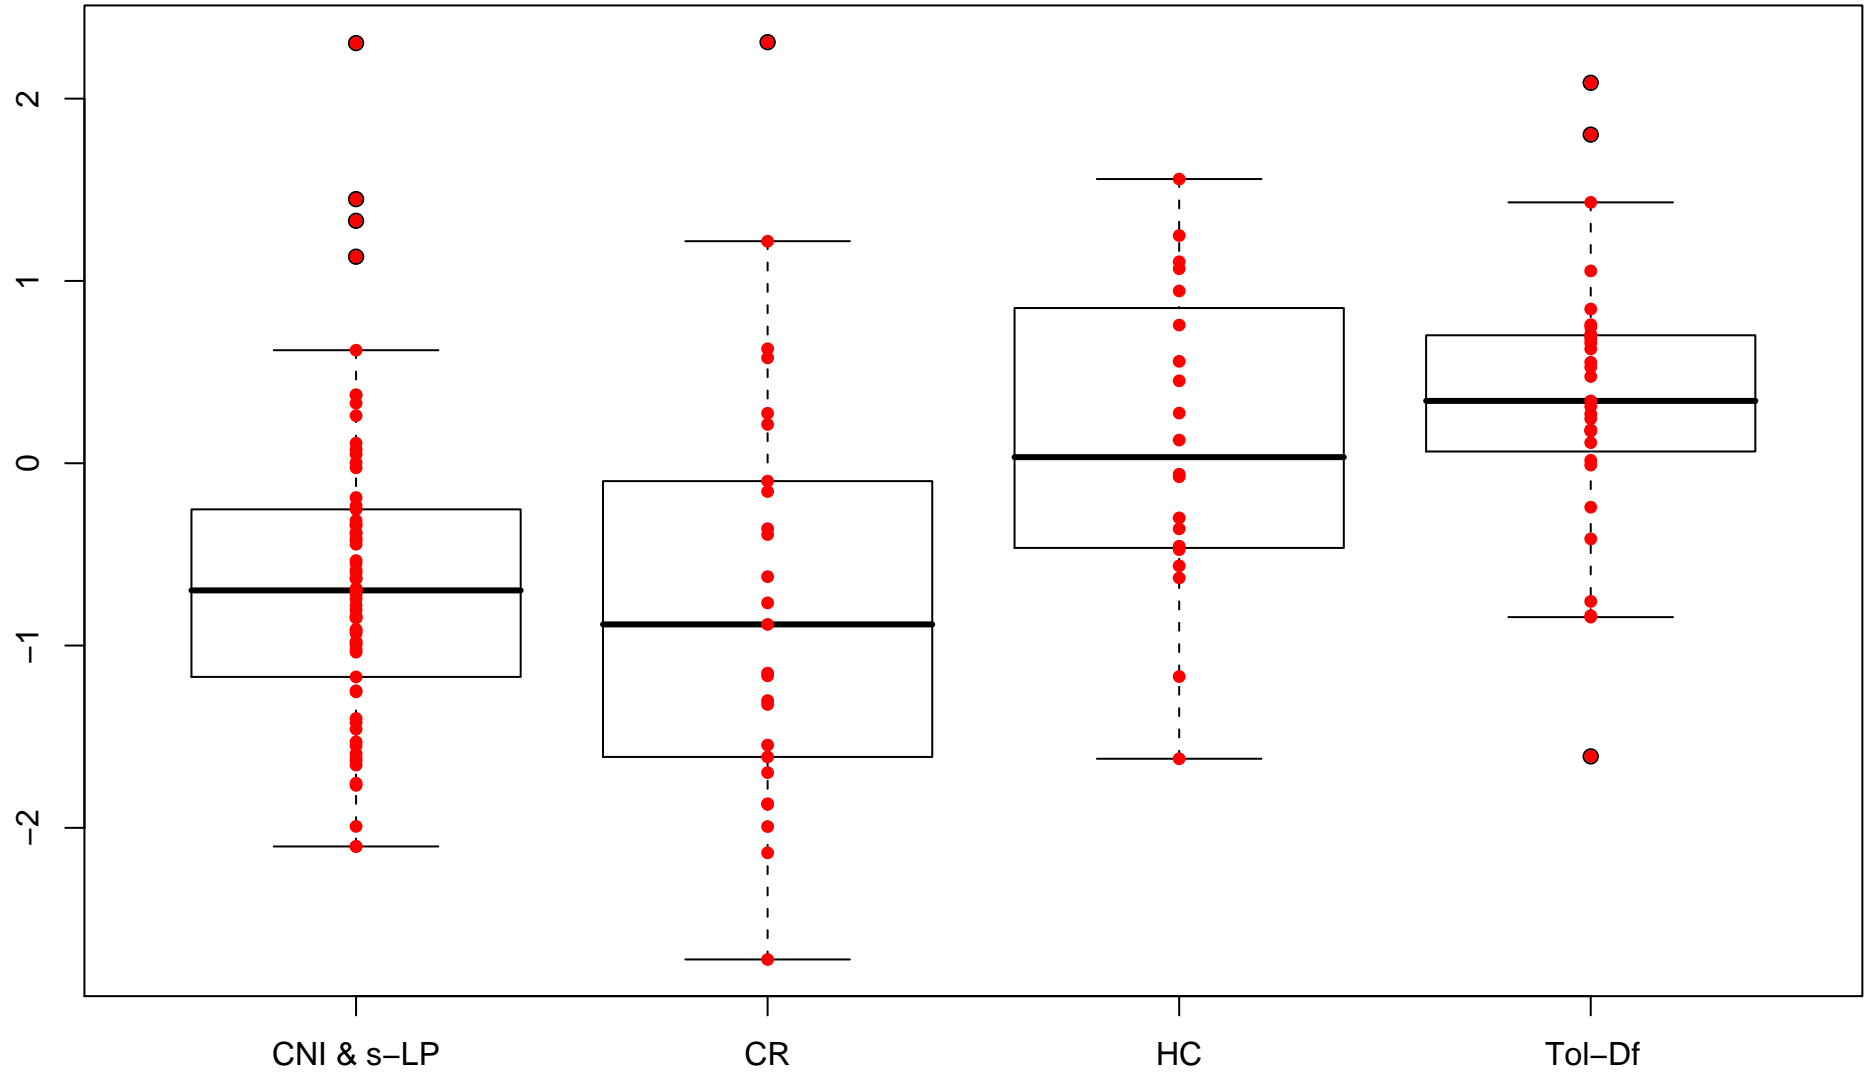

Rank 82 : EBI2  
2.5917e-07

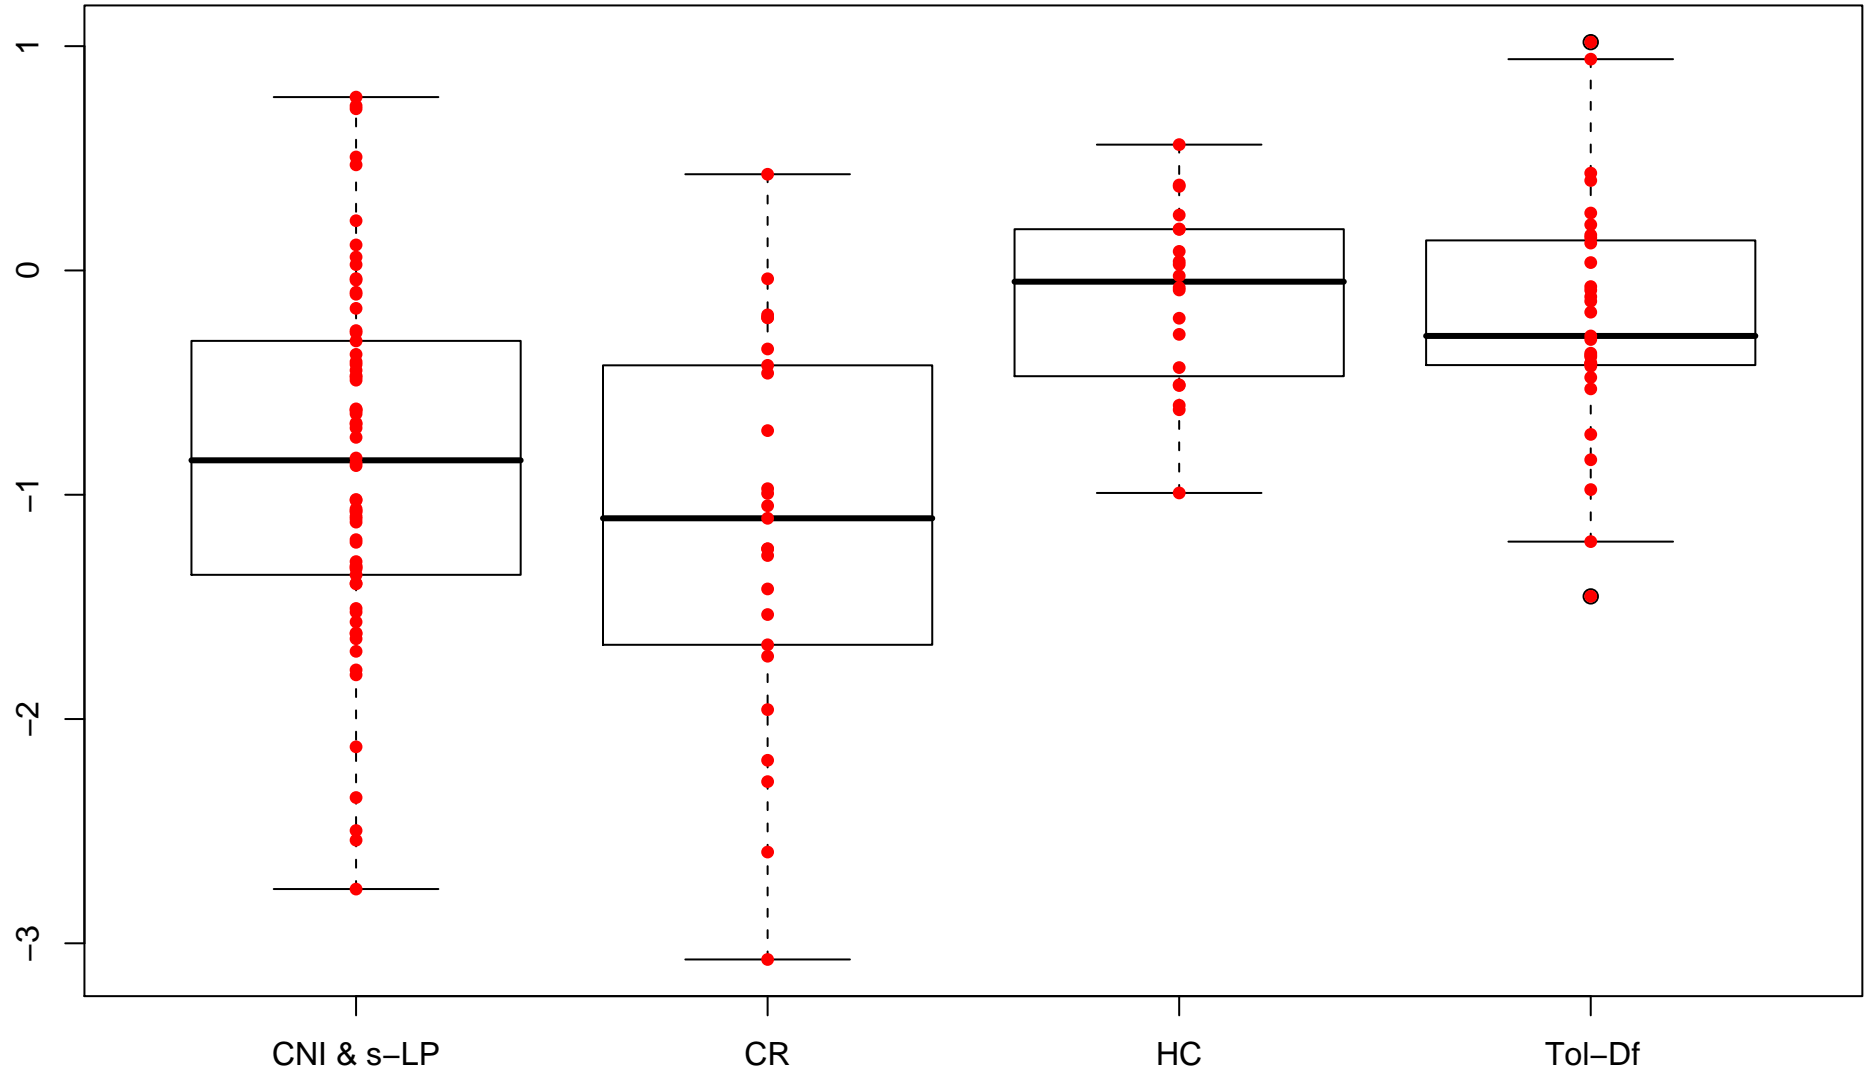

Rank 83 : SORT1  
2.8479e-07

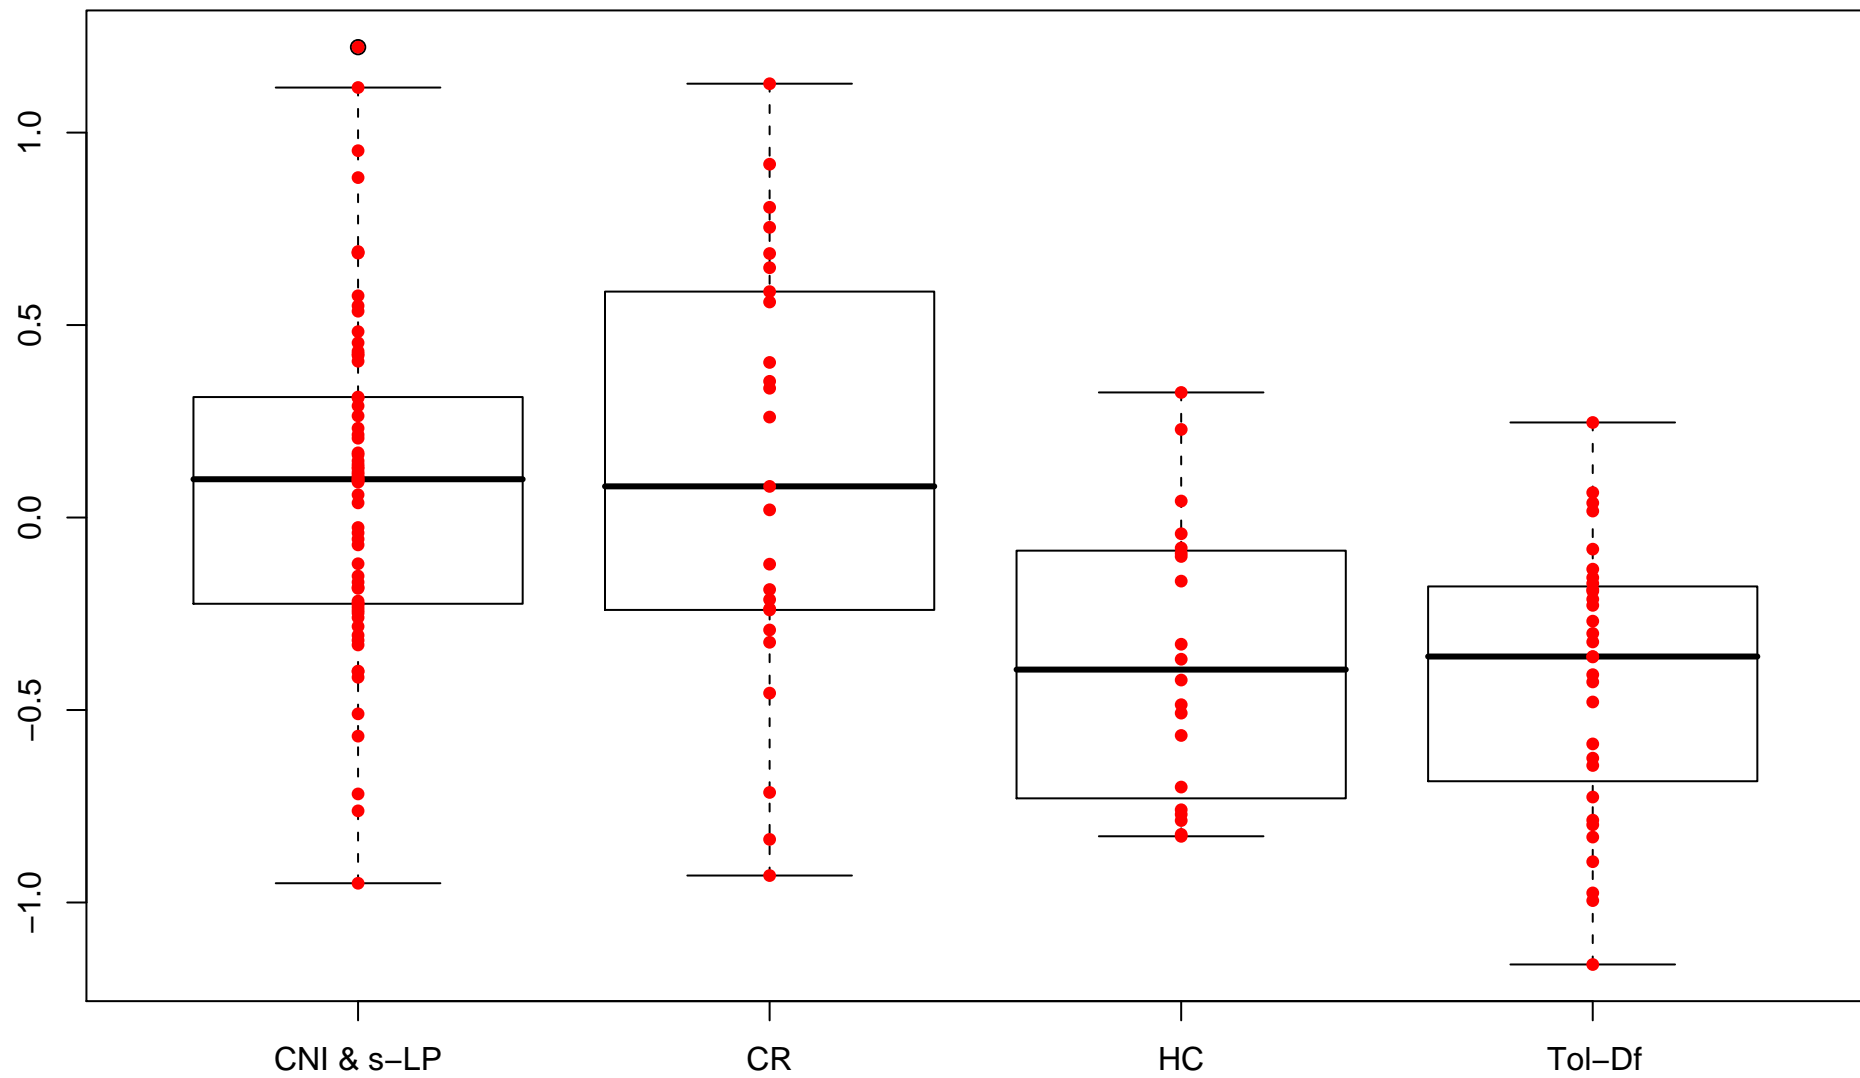

Rank 84 : LAT  
2.9319e-07

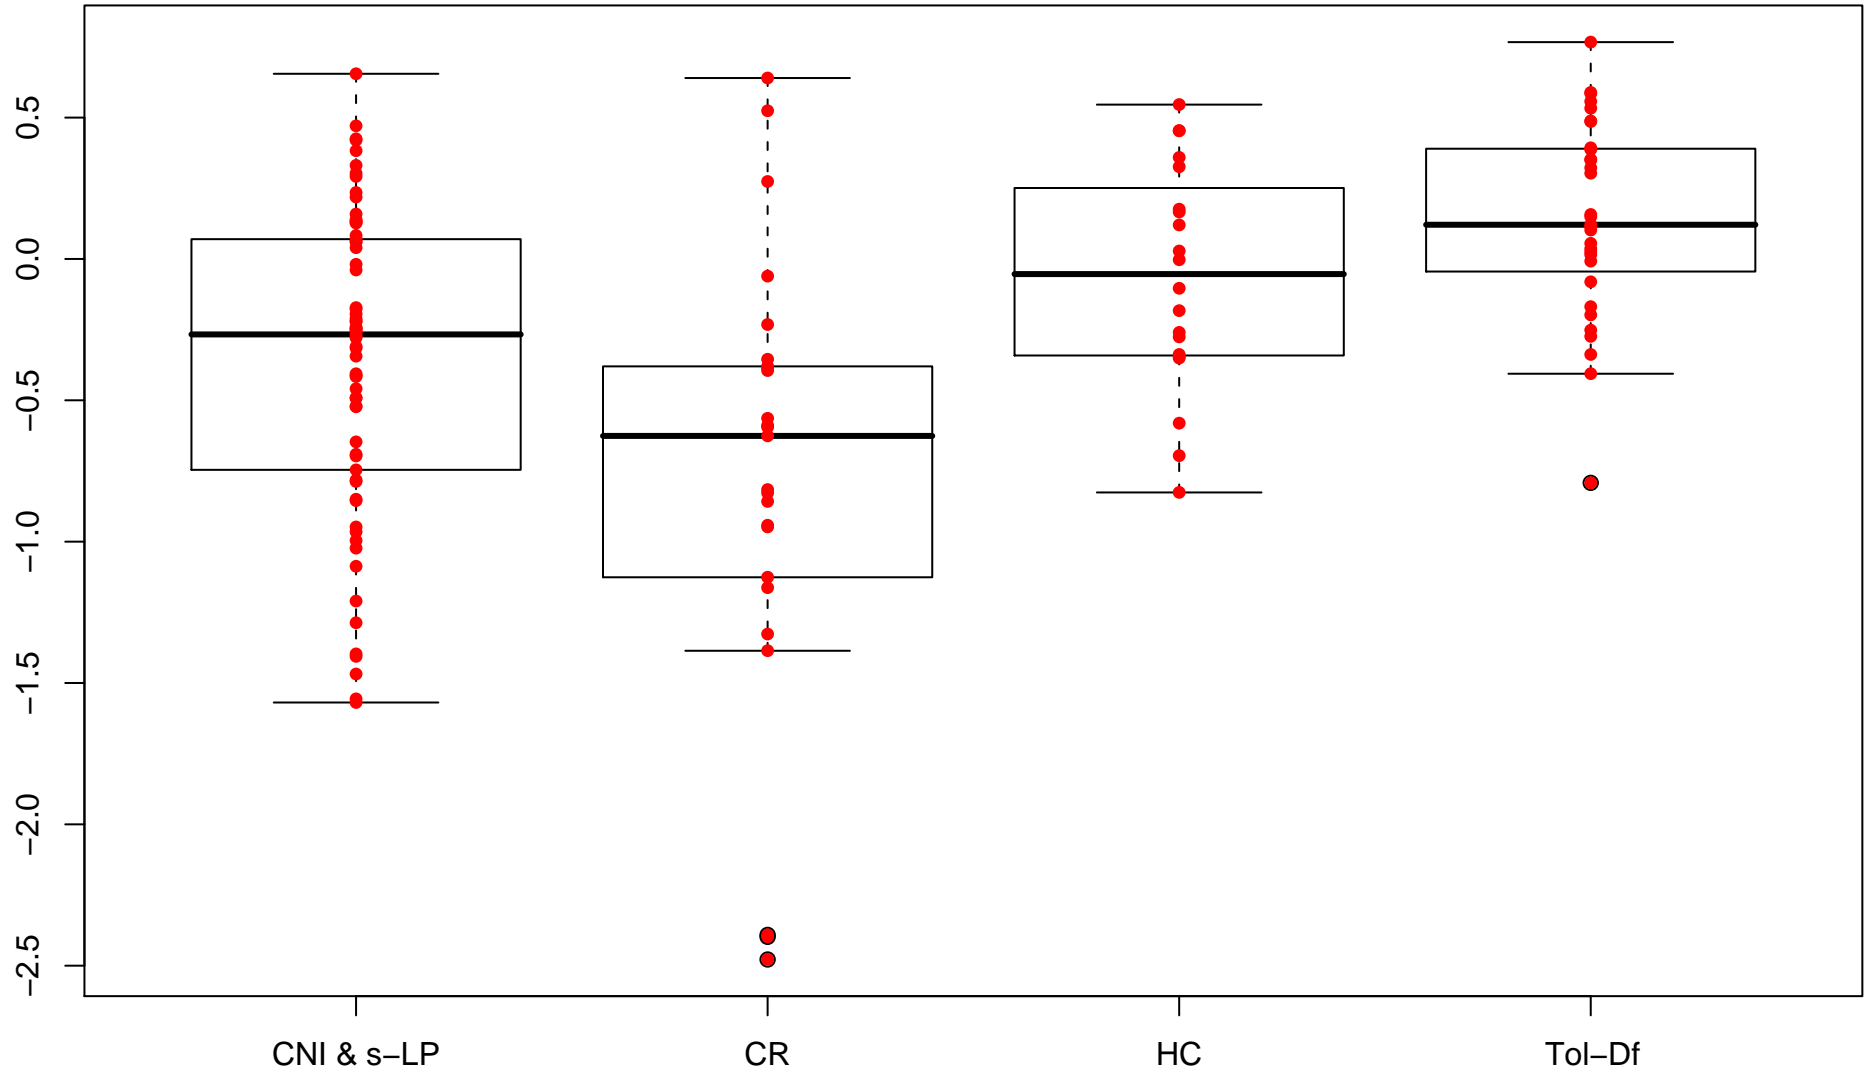

Rank 85 : BNIP3

2.9924e-07

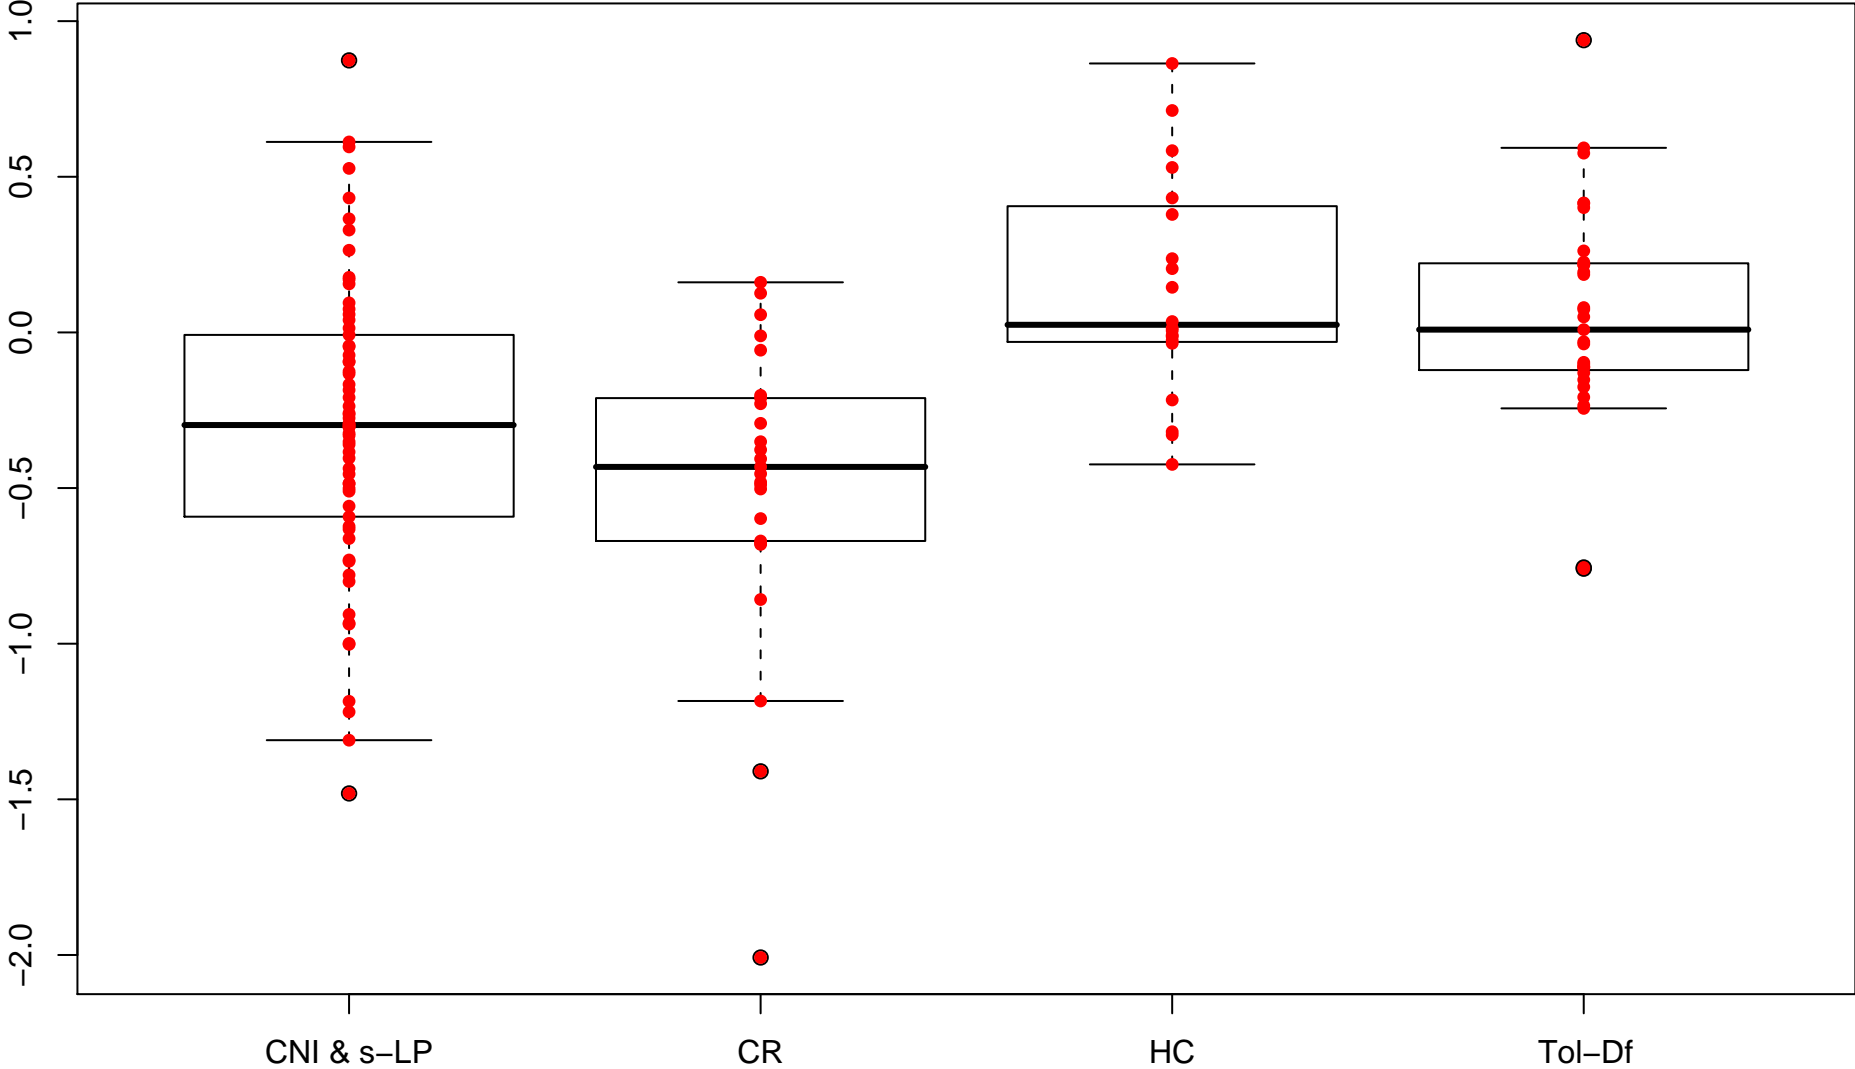

Rank 86 : MGC24039  
3.0018e-07

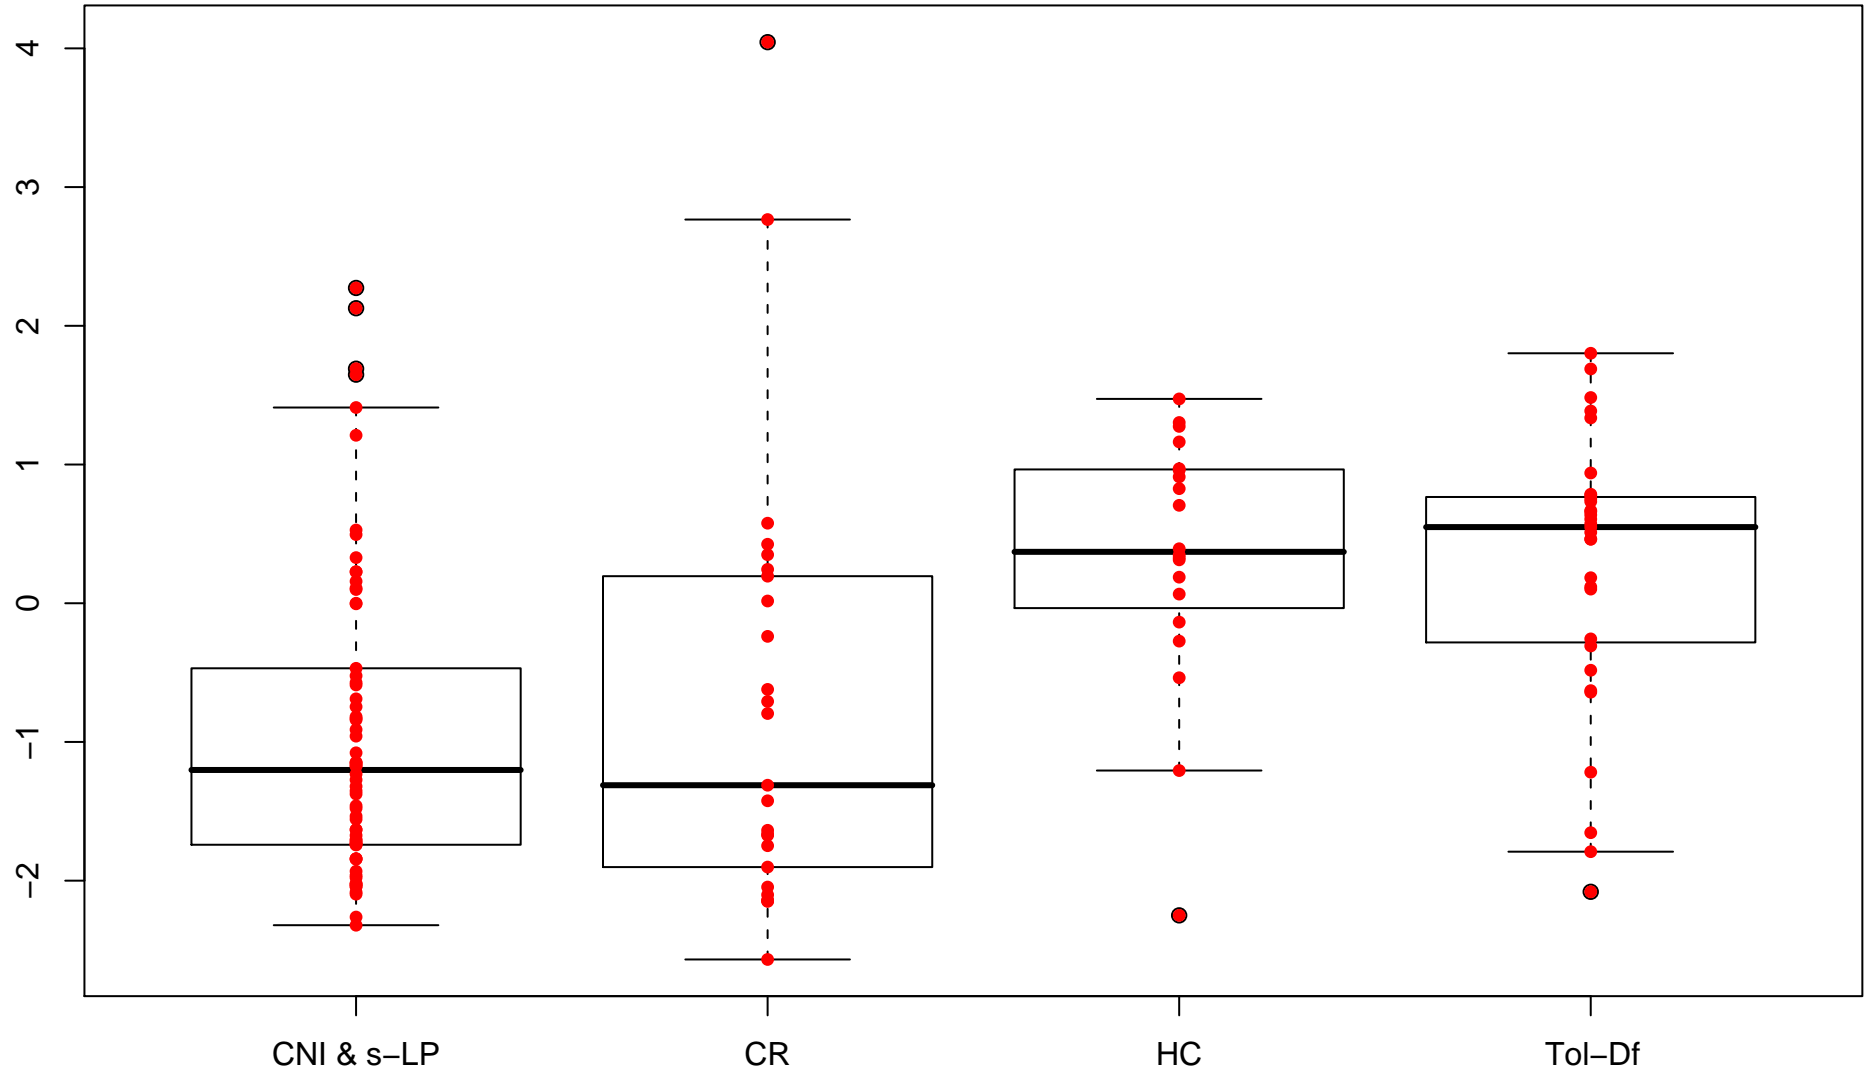

Rank 87 : RFC4  
3.186e-07

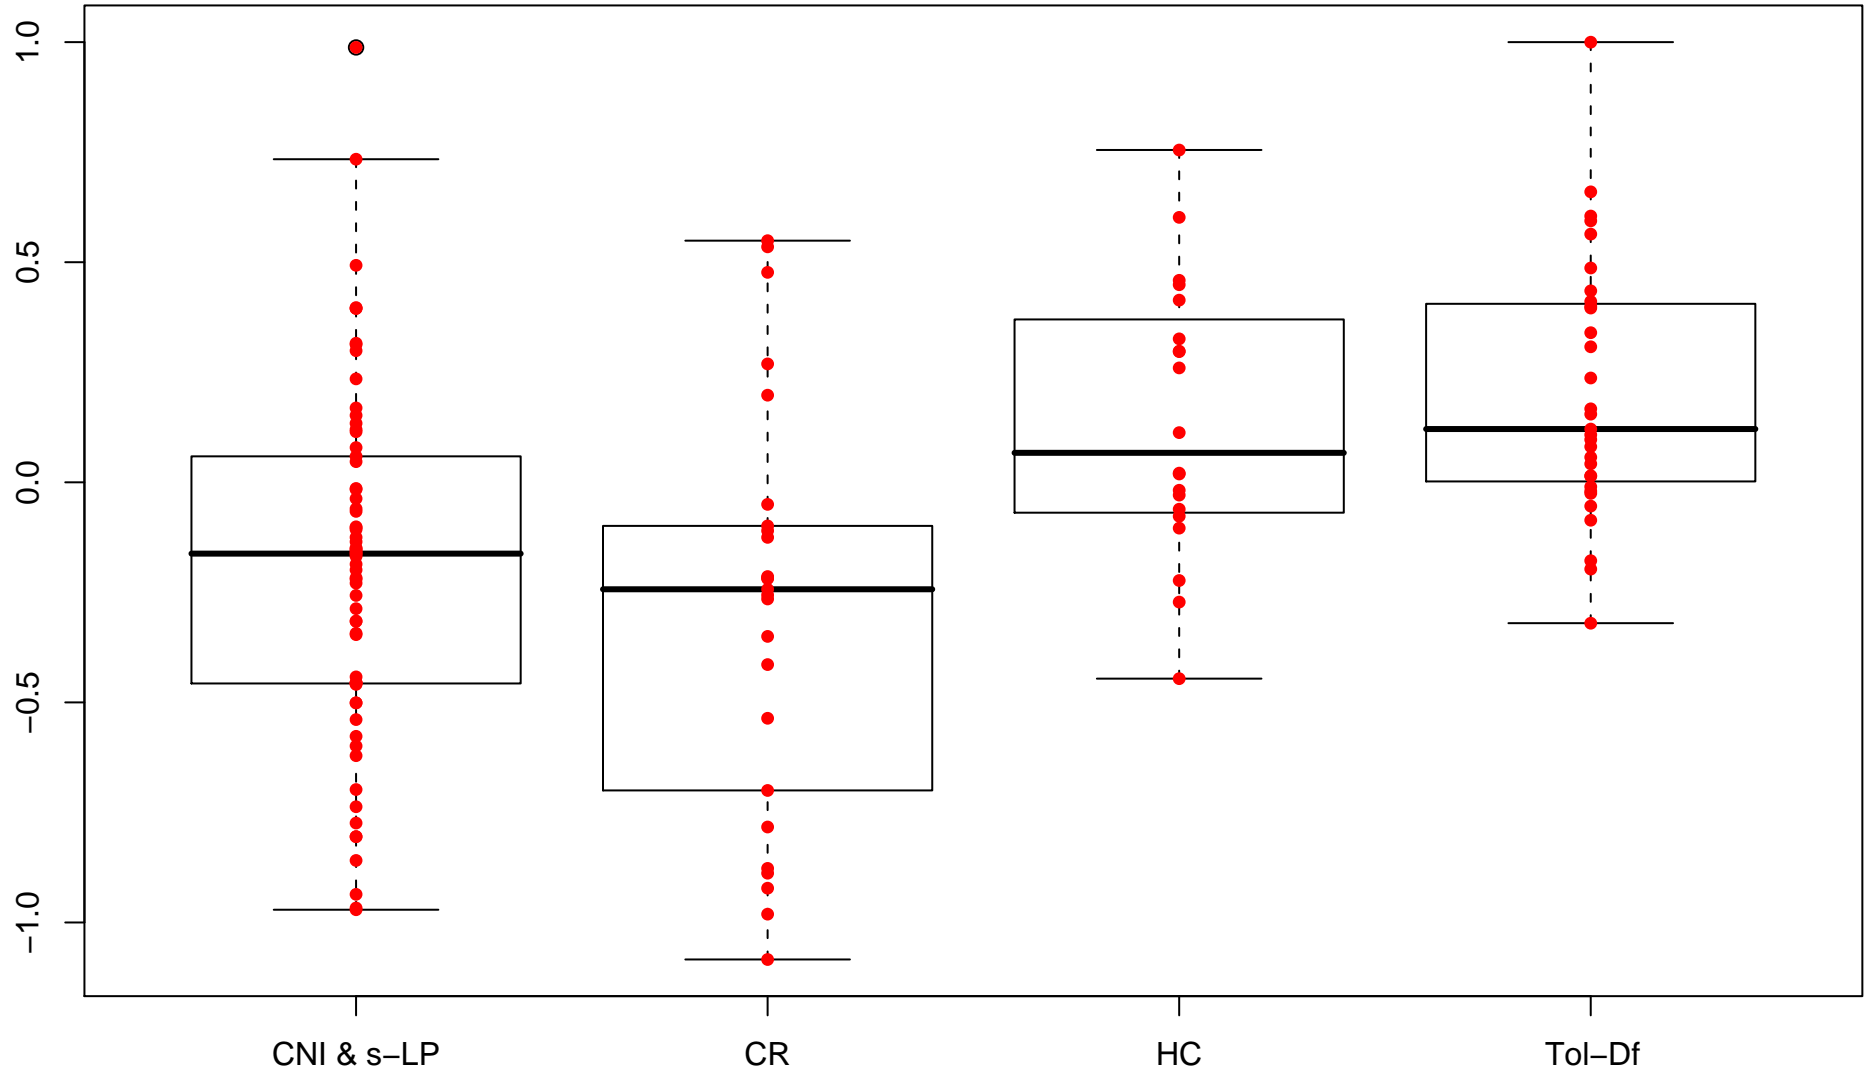



Rank 88 : NEDD4L  
3.24e-07

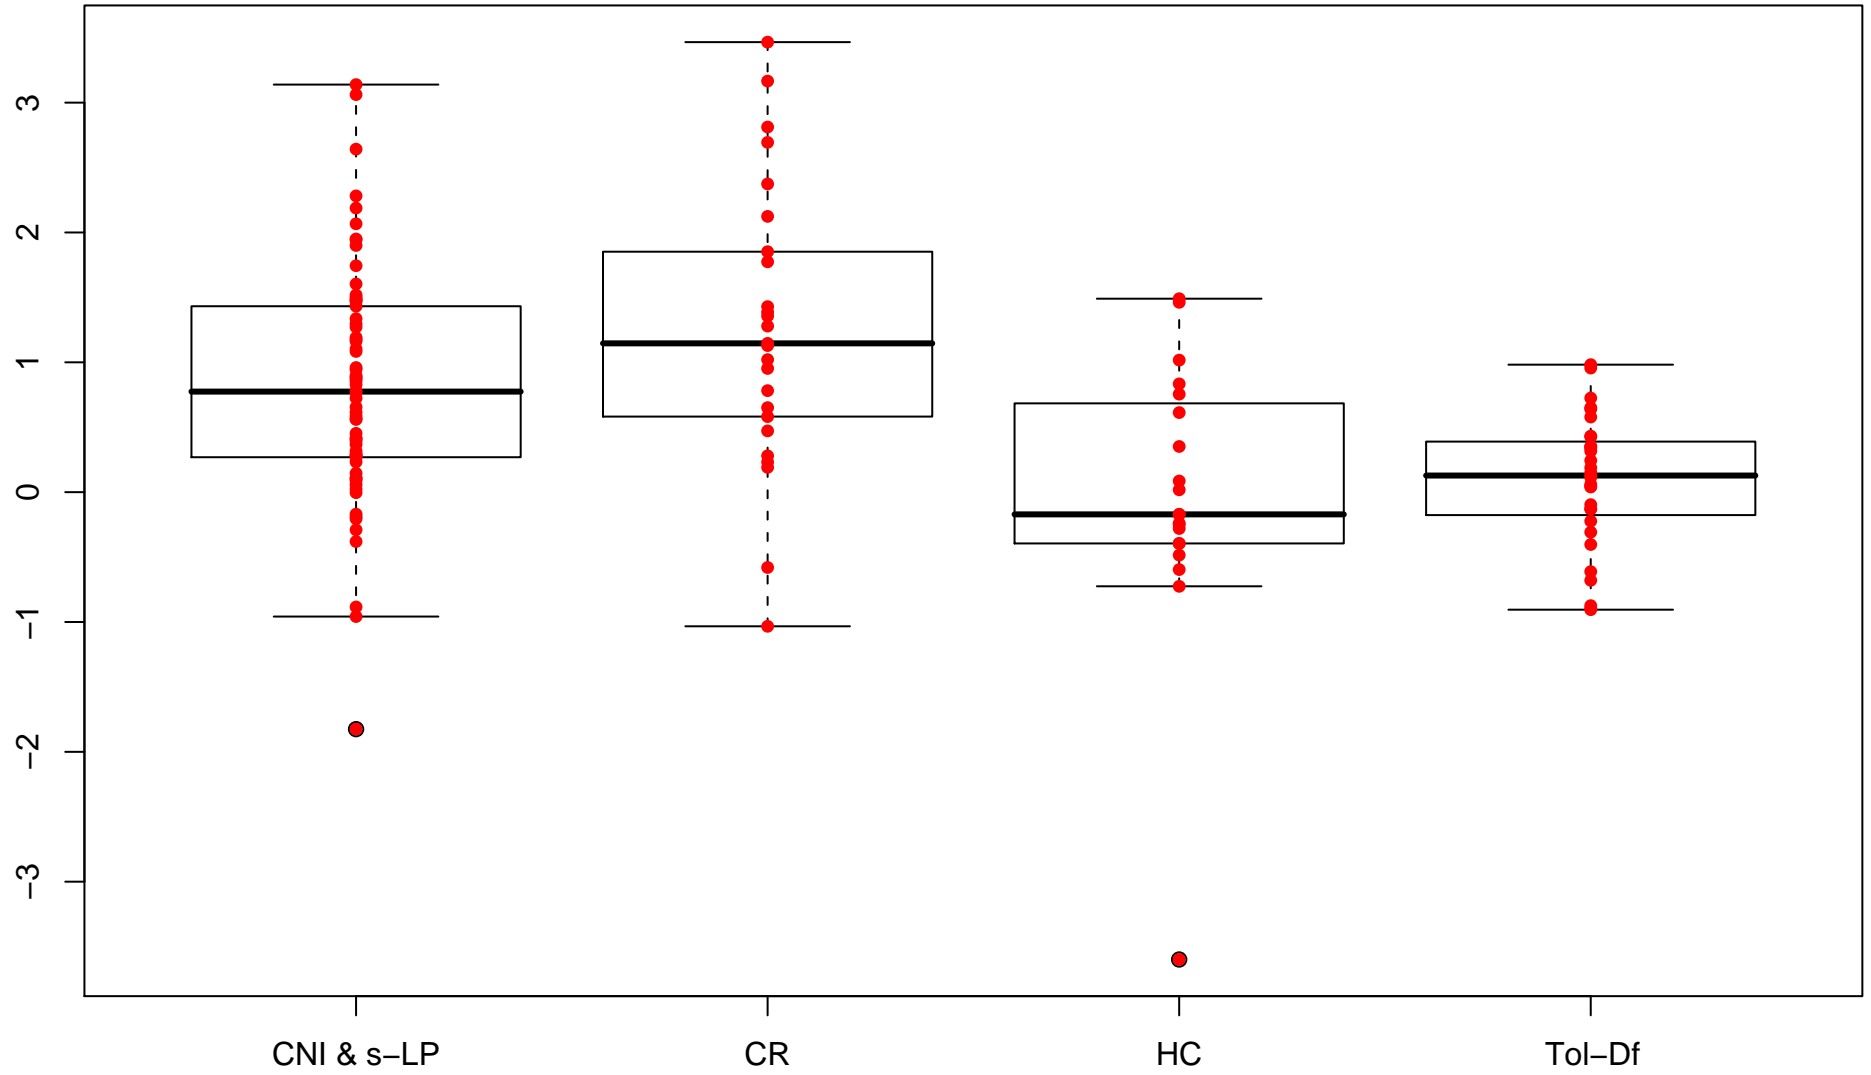

Rank 89 : ABLIM1  
3.253e-07

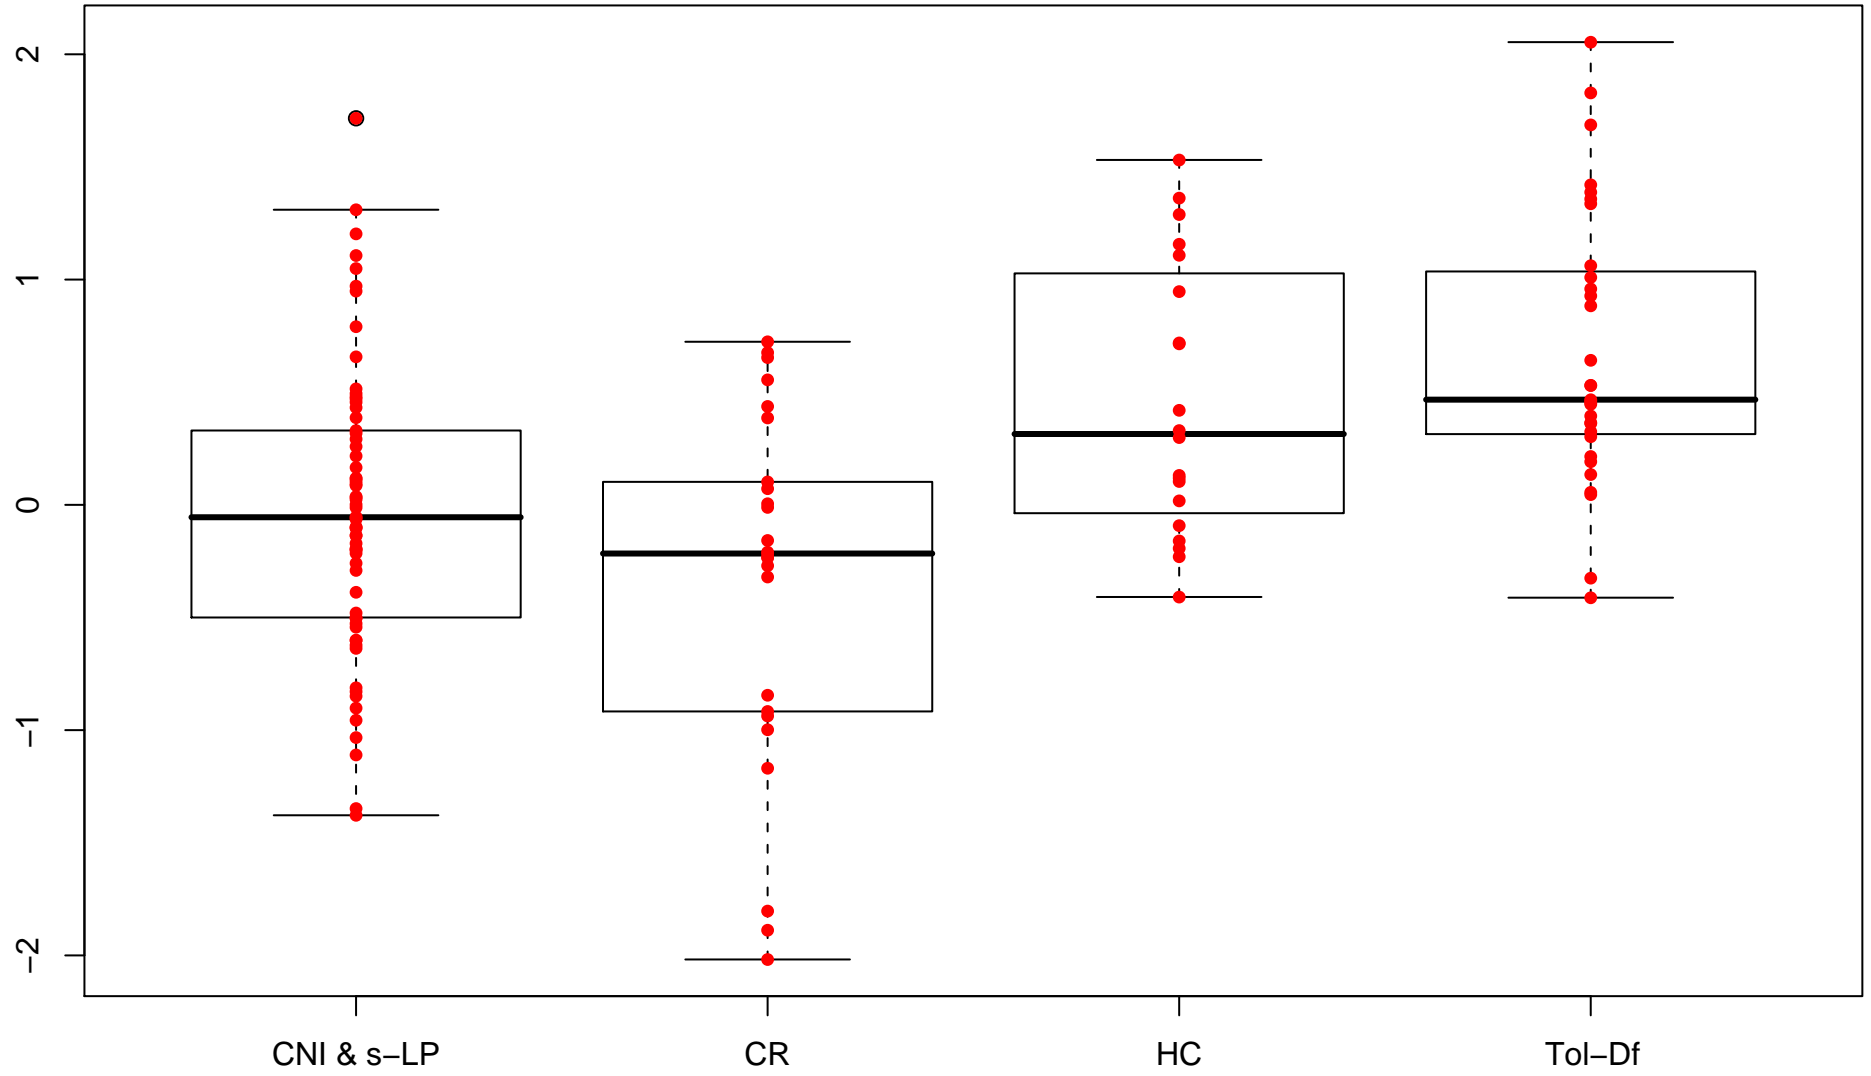

Rank 90 : QRSL1  
3.532e-07

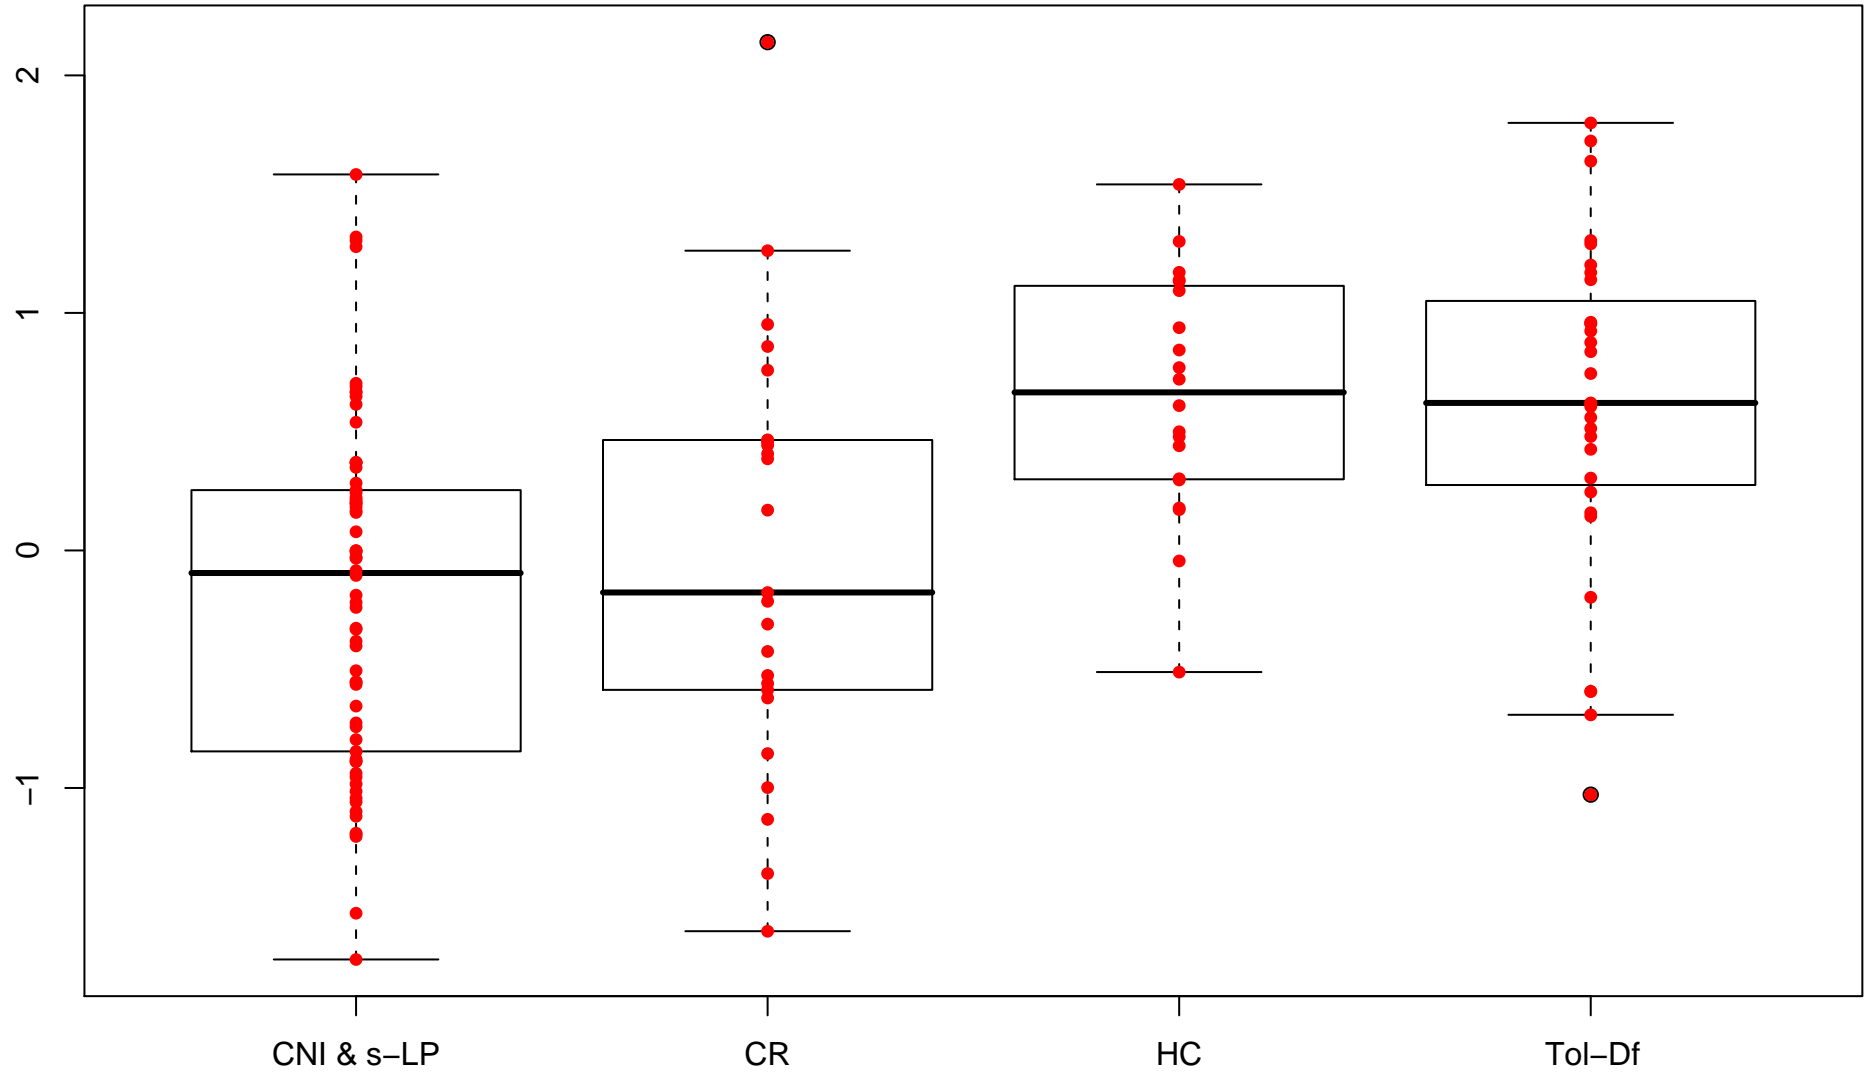

Rank 91 : MAOA  
3.712e-07

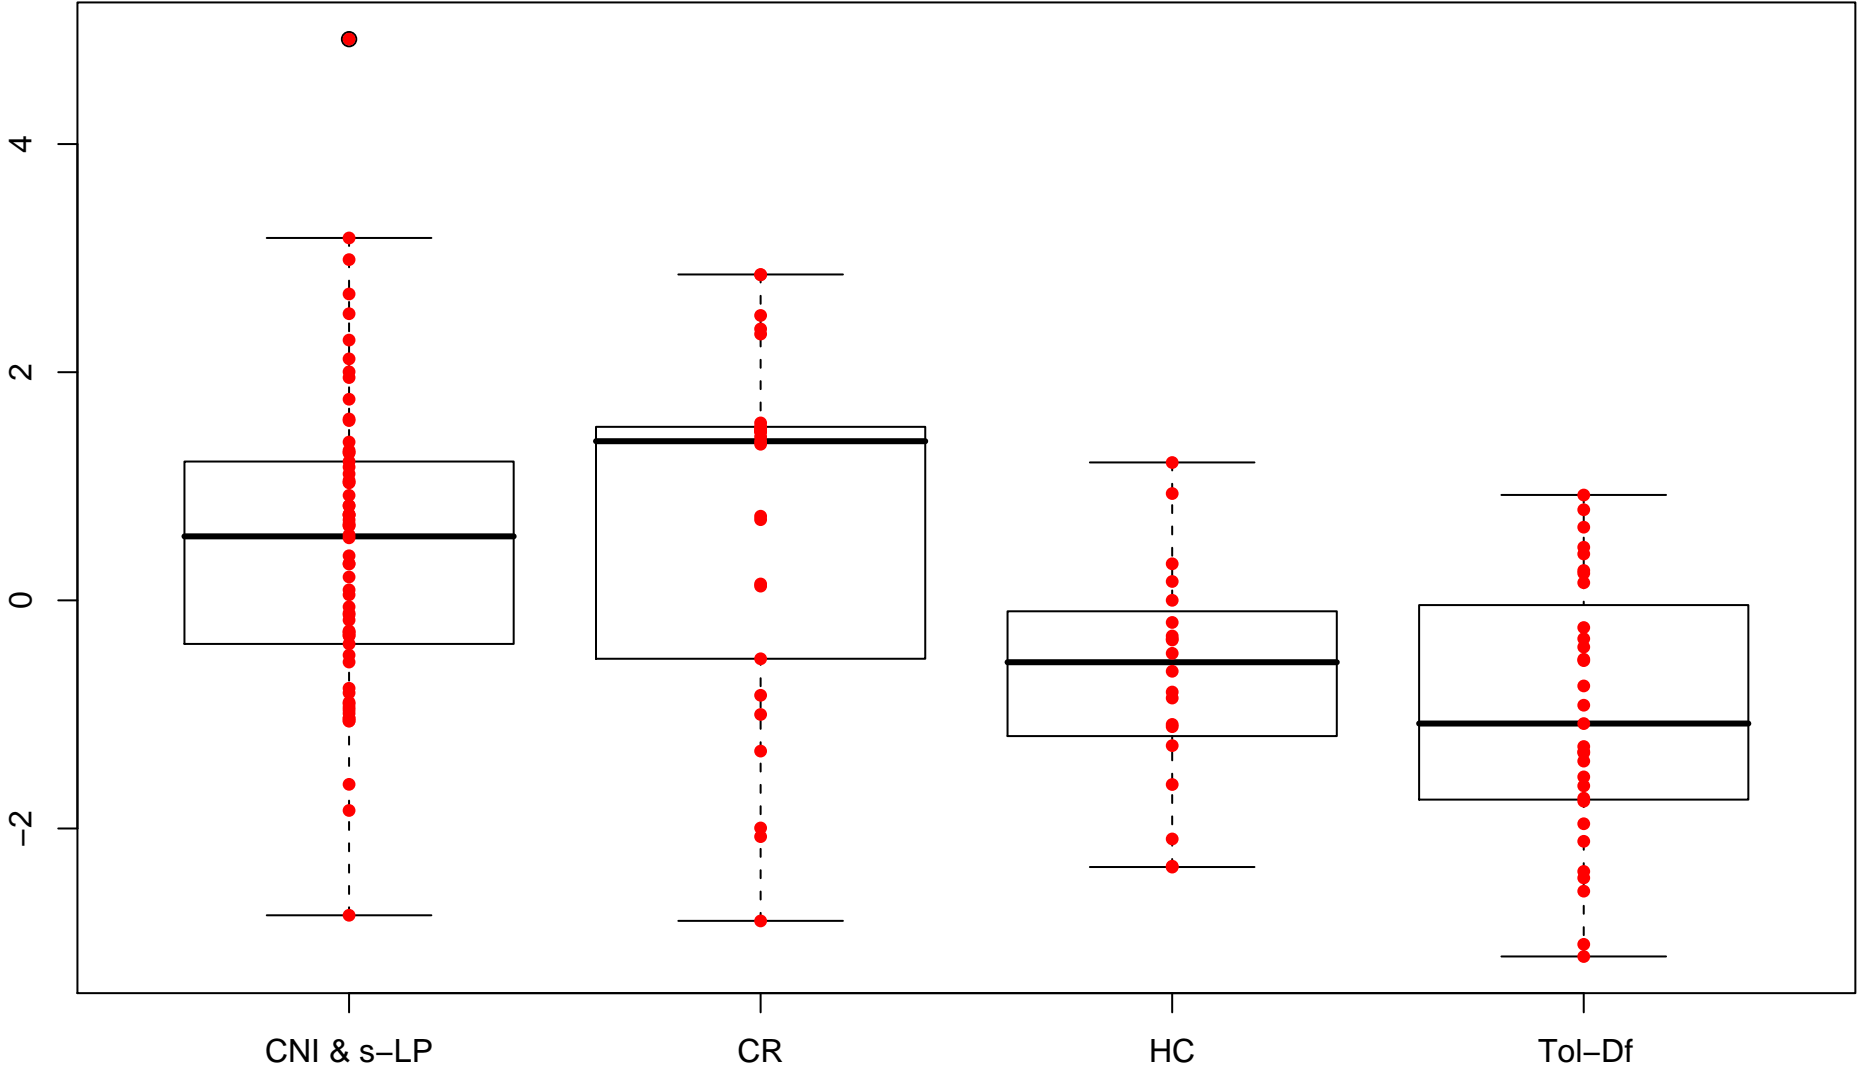

Rank 92 : LOC643837  
3.754e-07

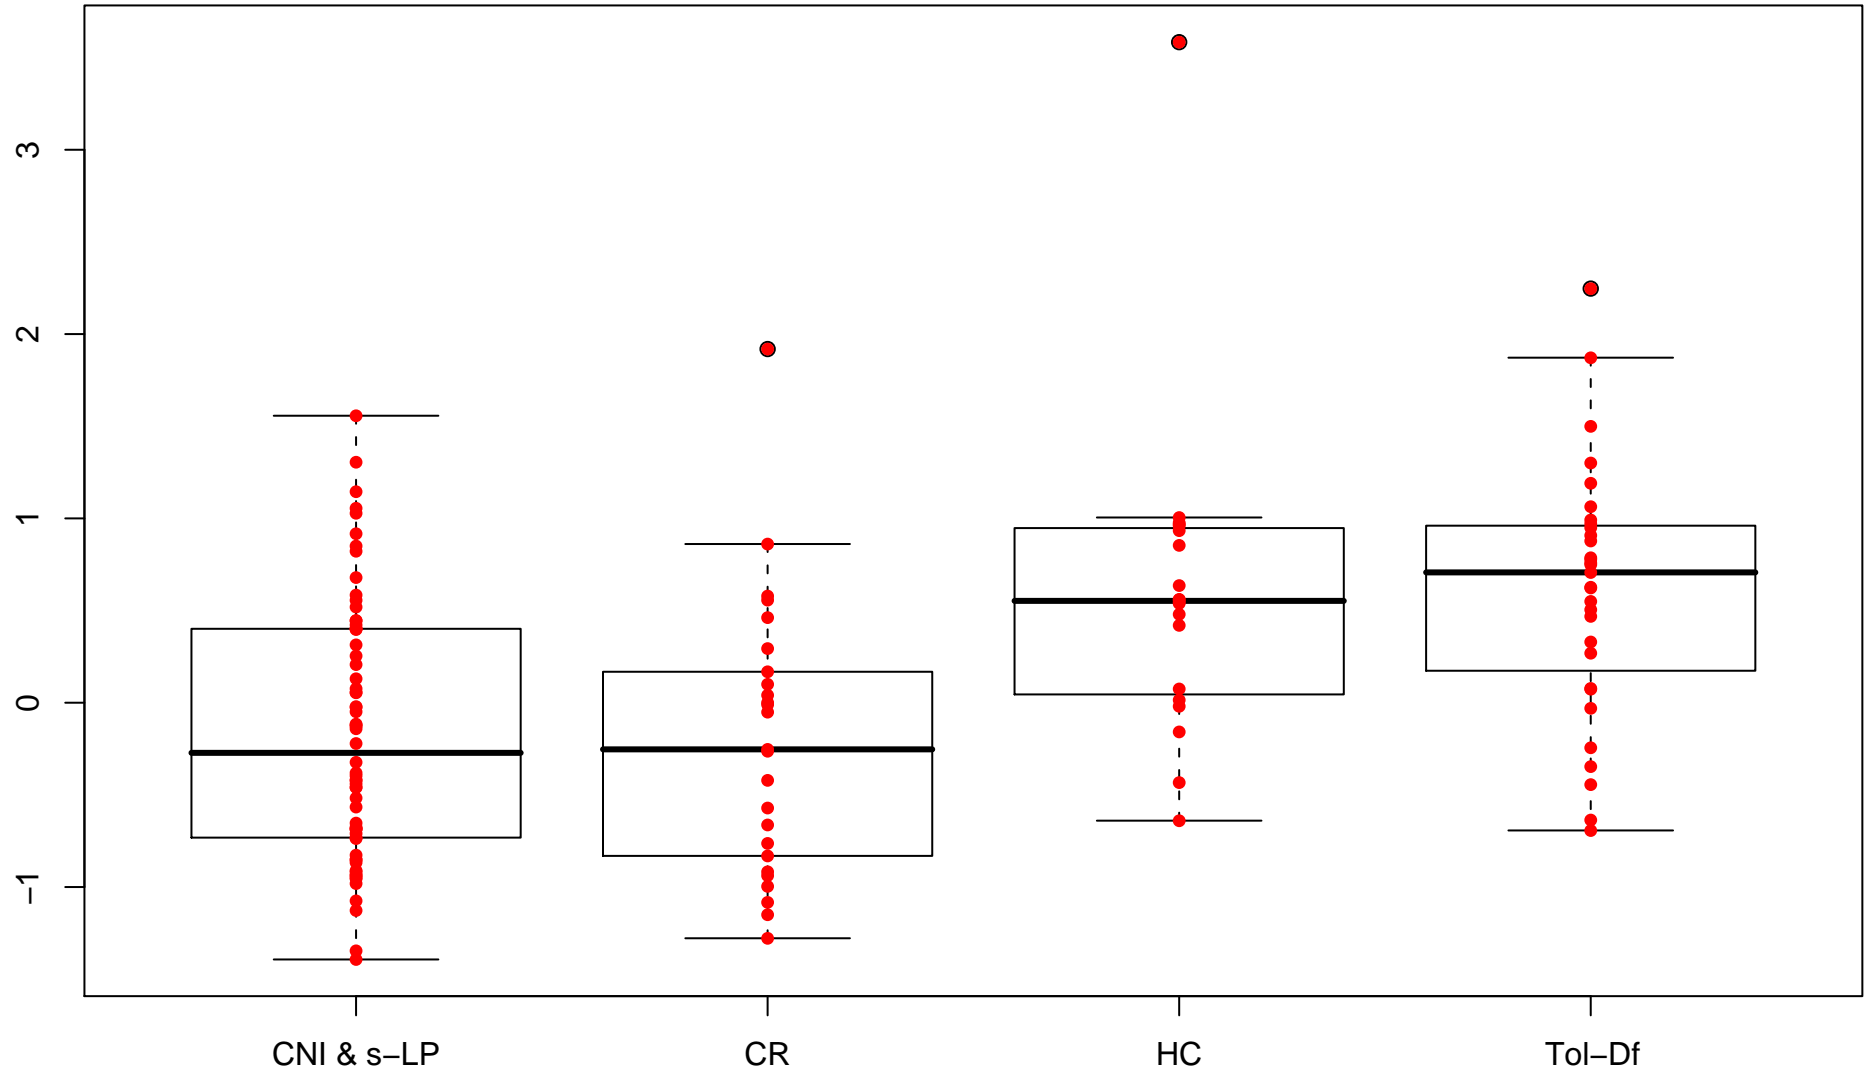

Rank 93 : TNCRNA  
3.94e-07

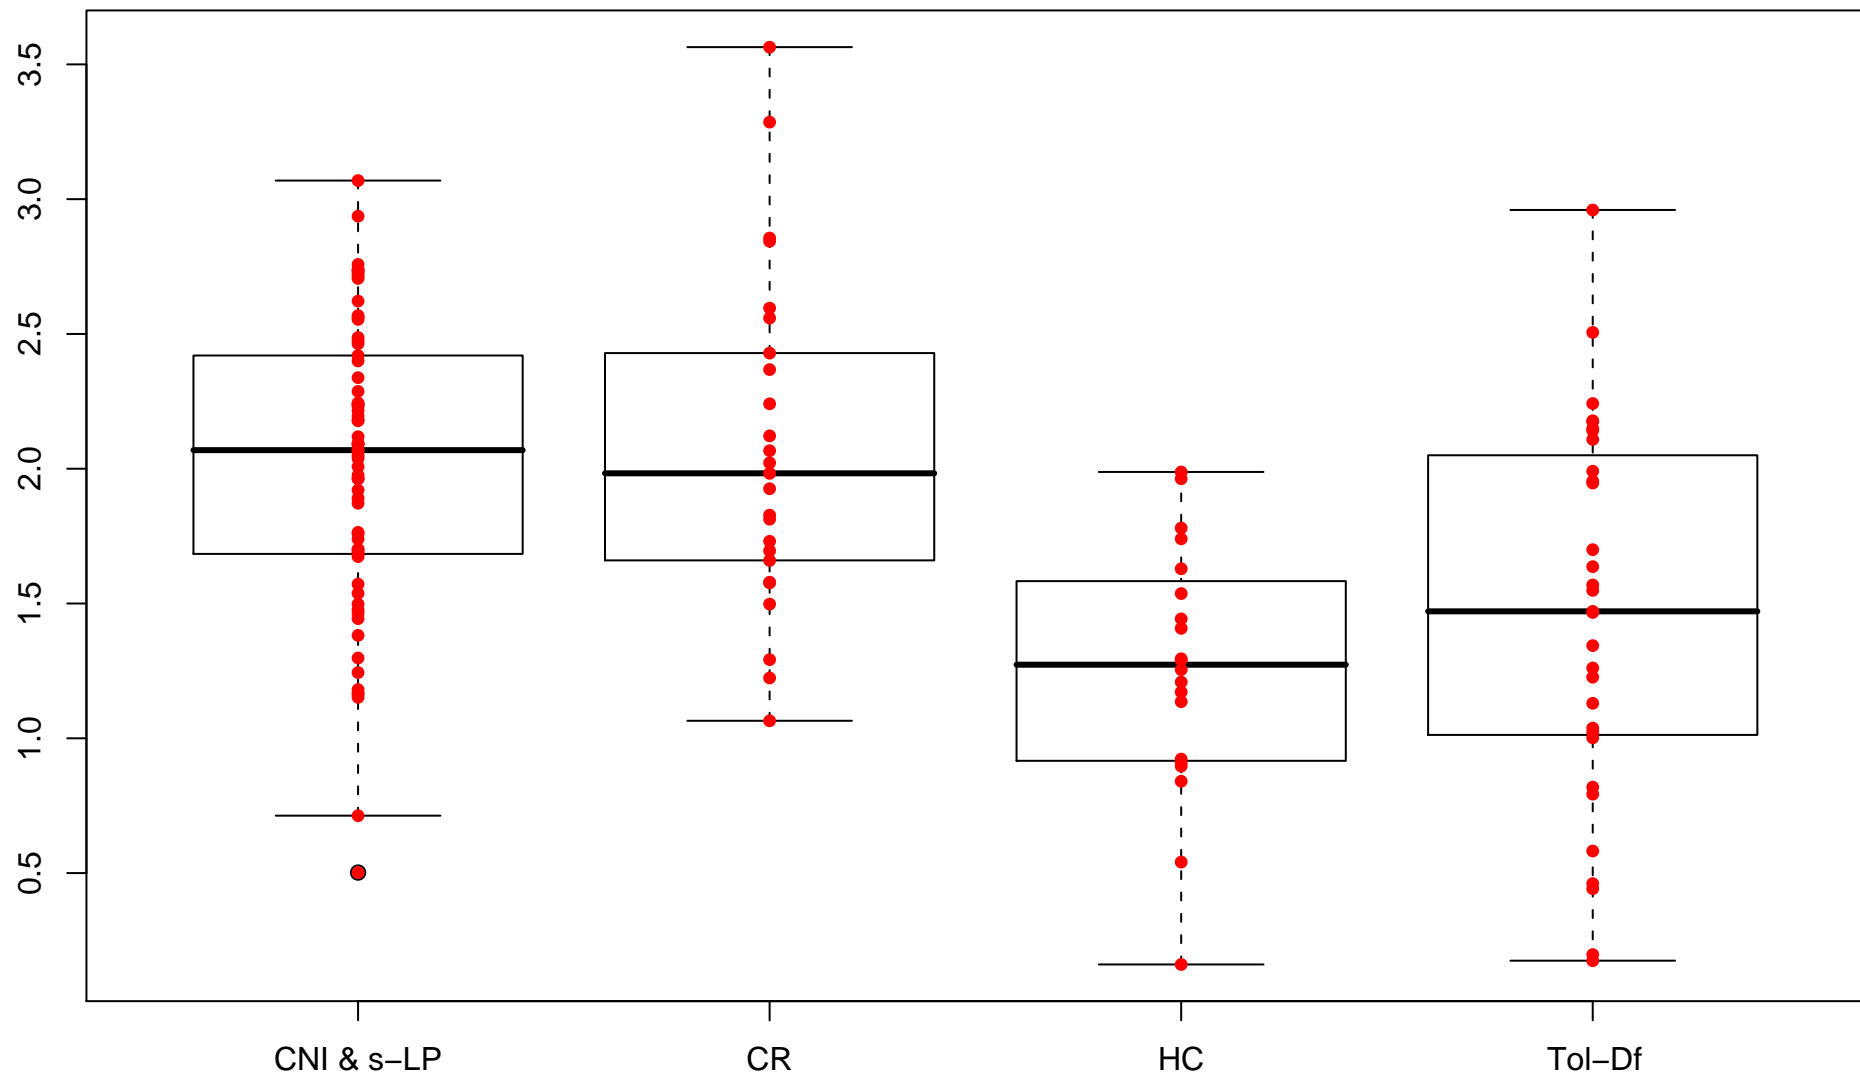

Rank 94 : MAPK14  
4.036e-07

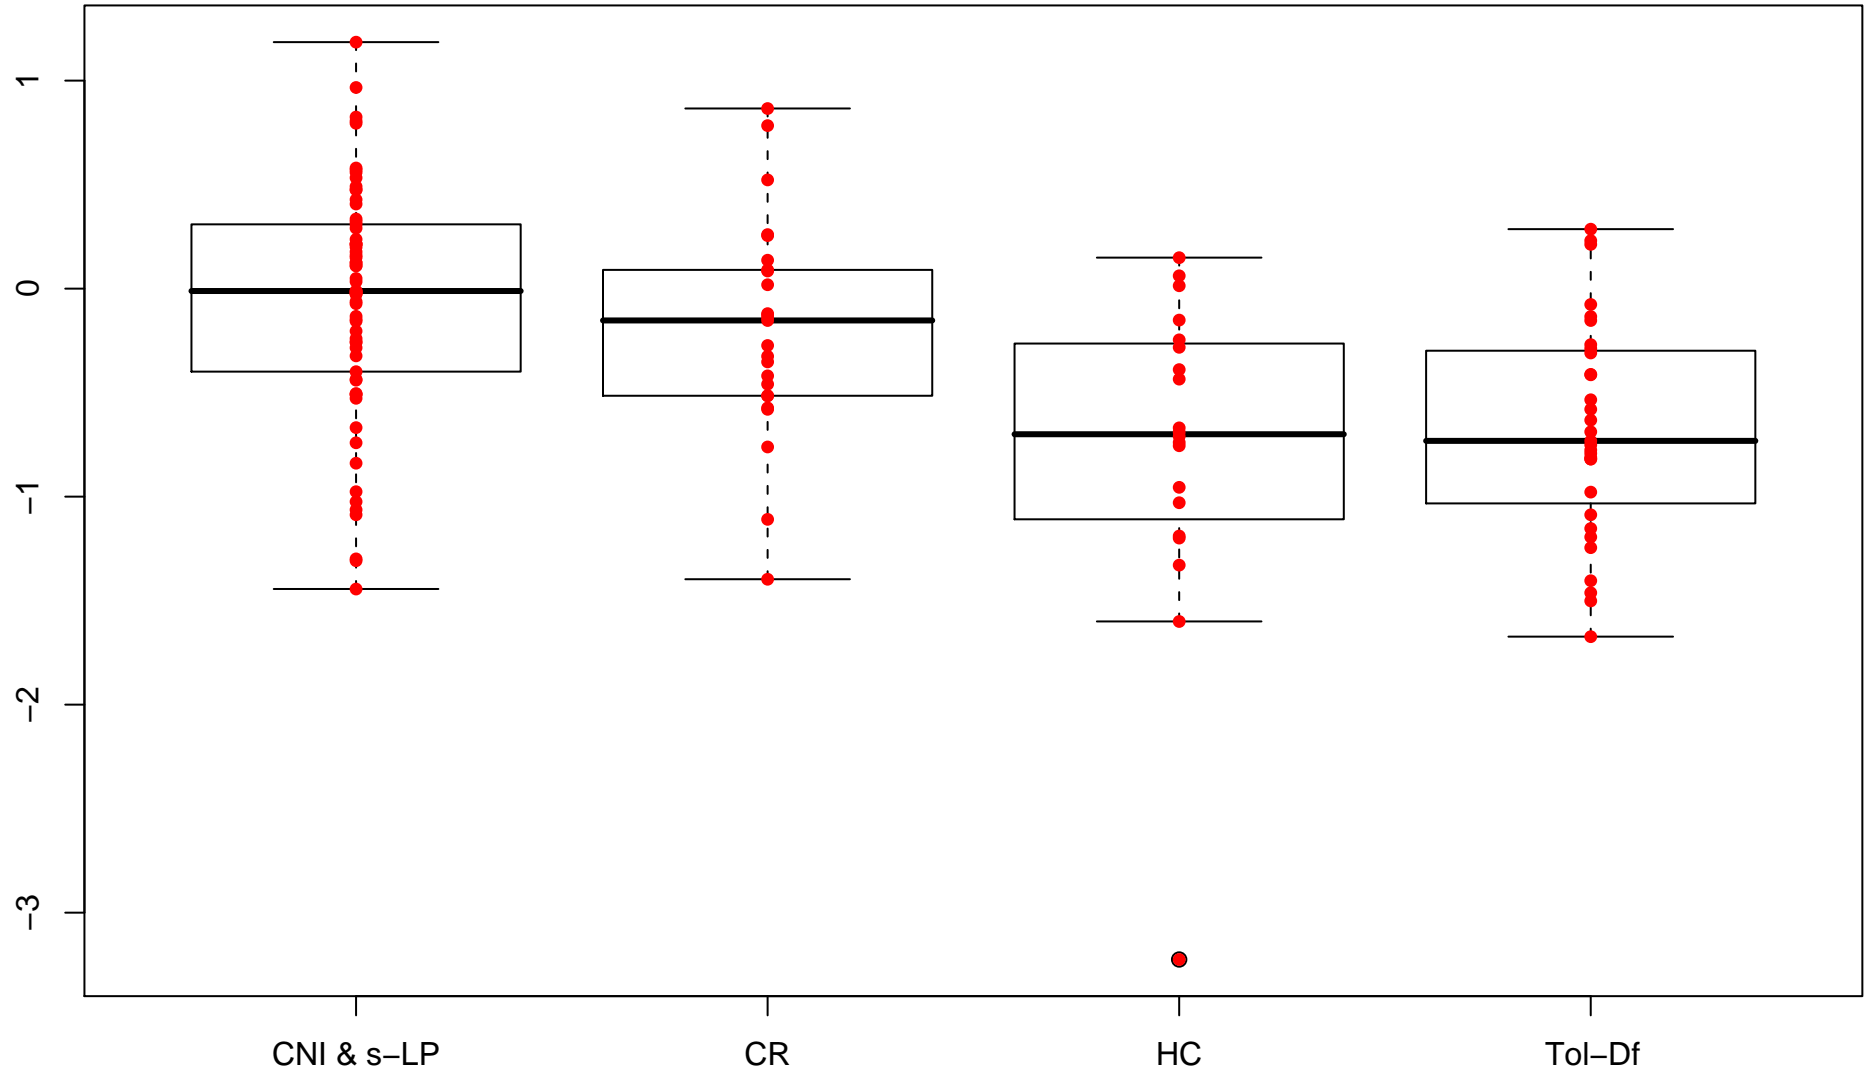

Rank 95 : CCR7  
4.492e-07

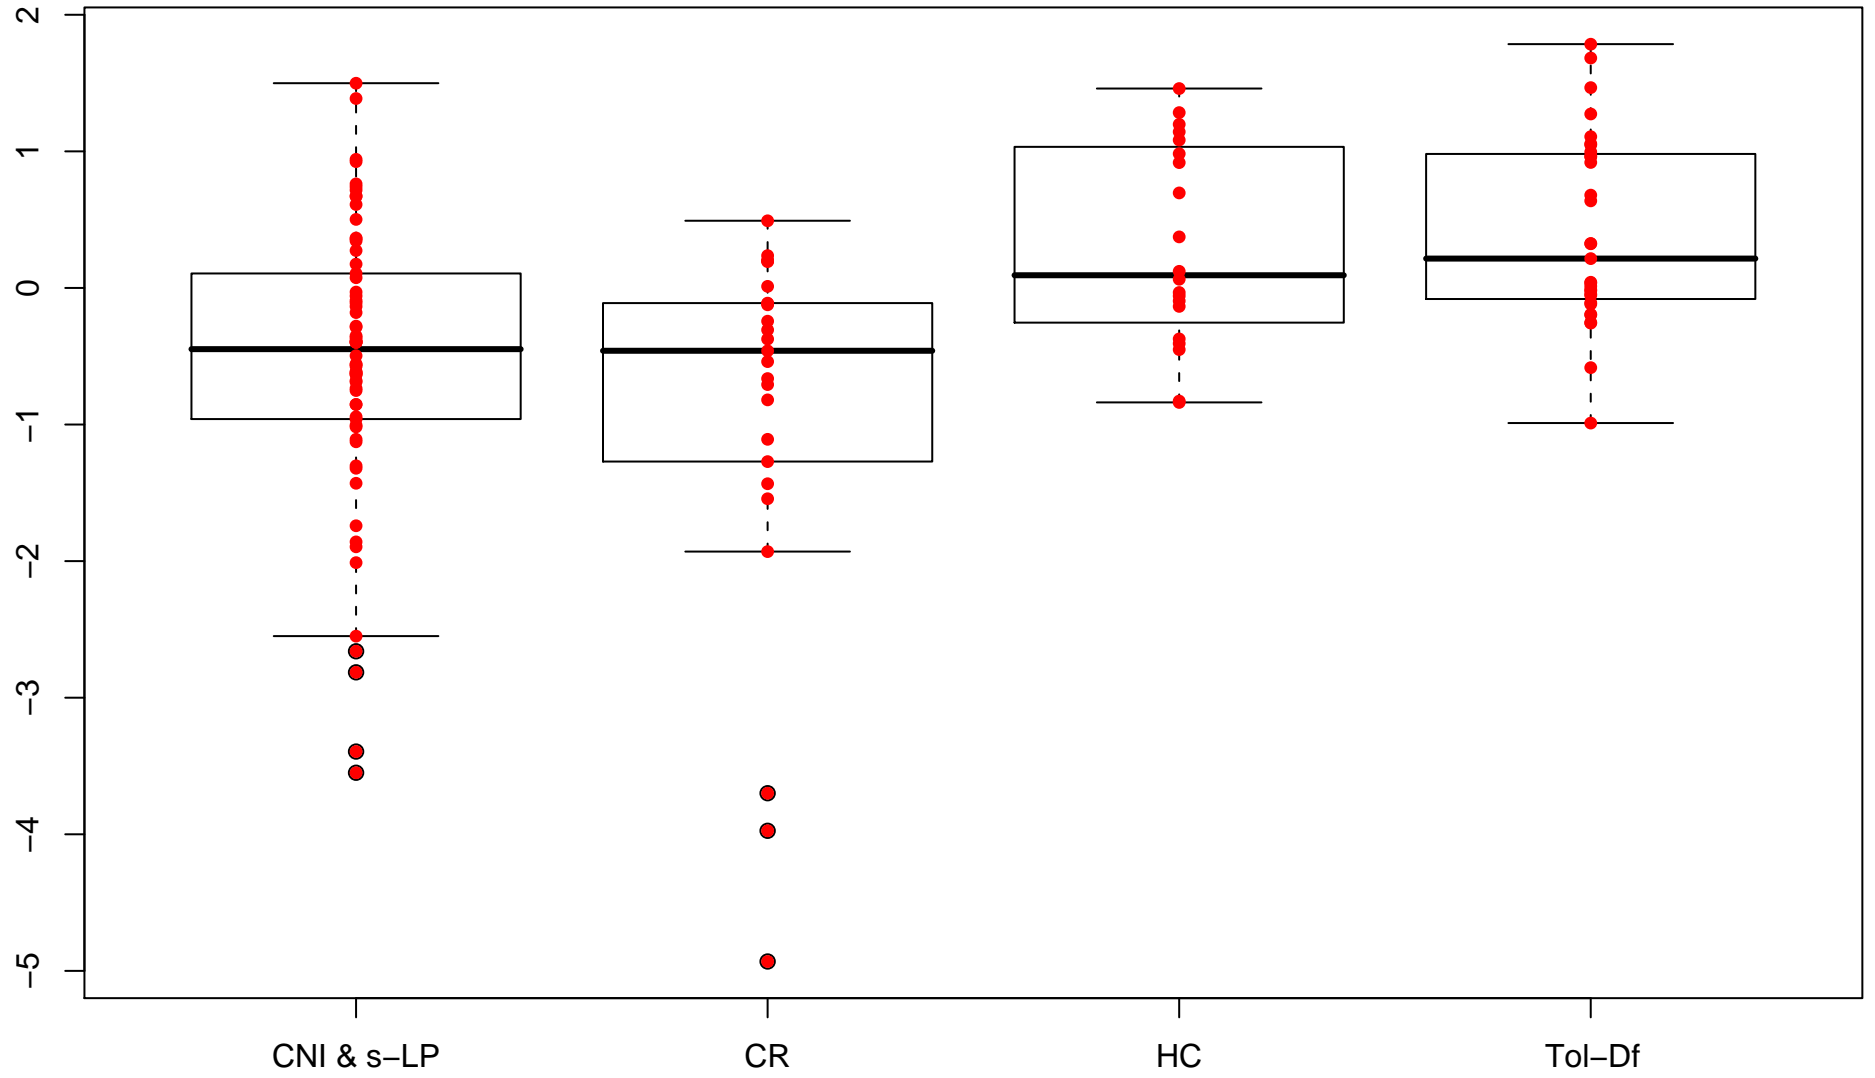



Rank 96 : LOC729349  
4.629e-07

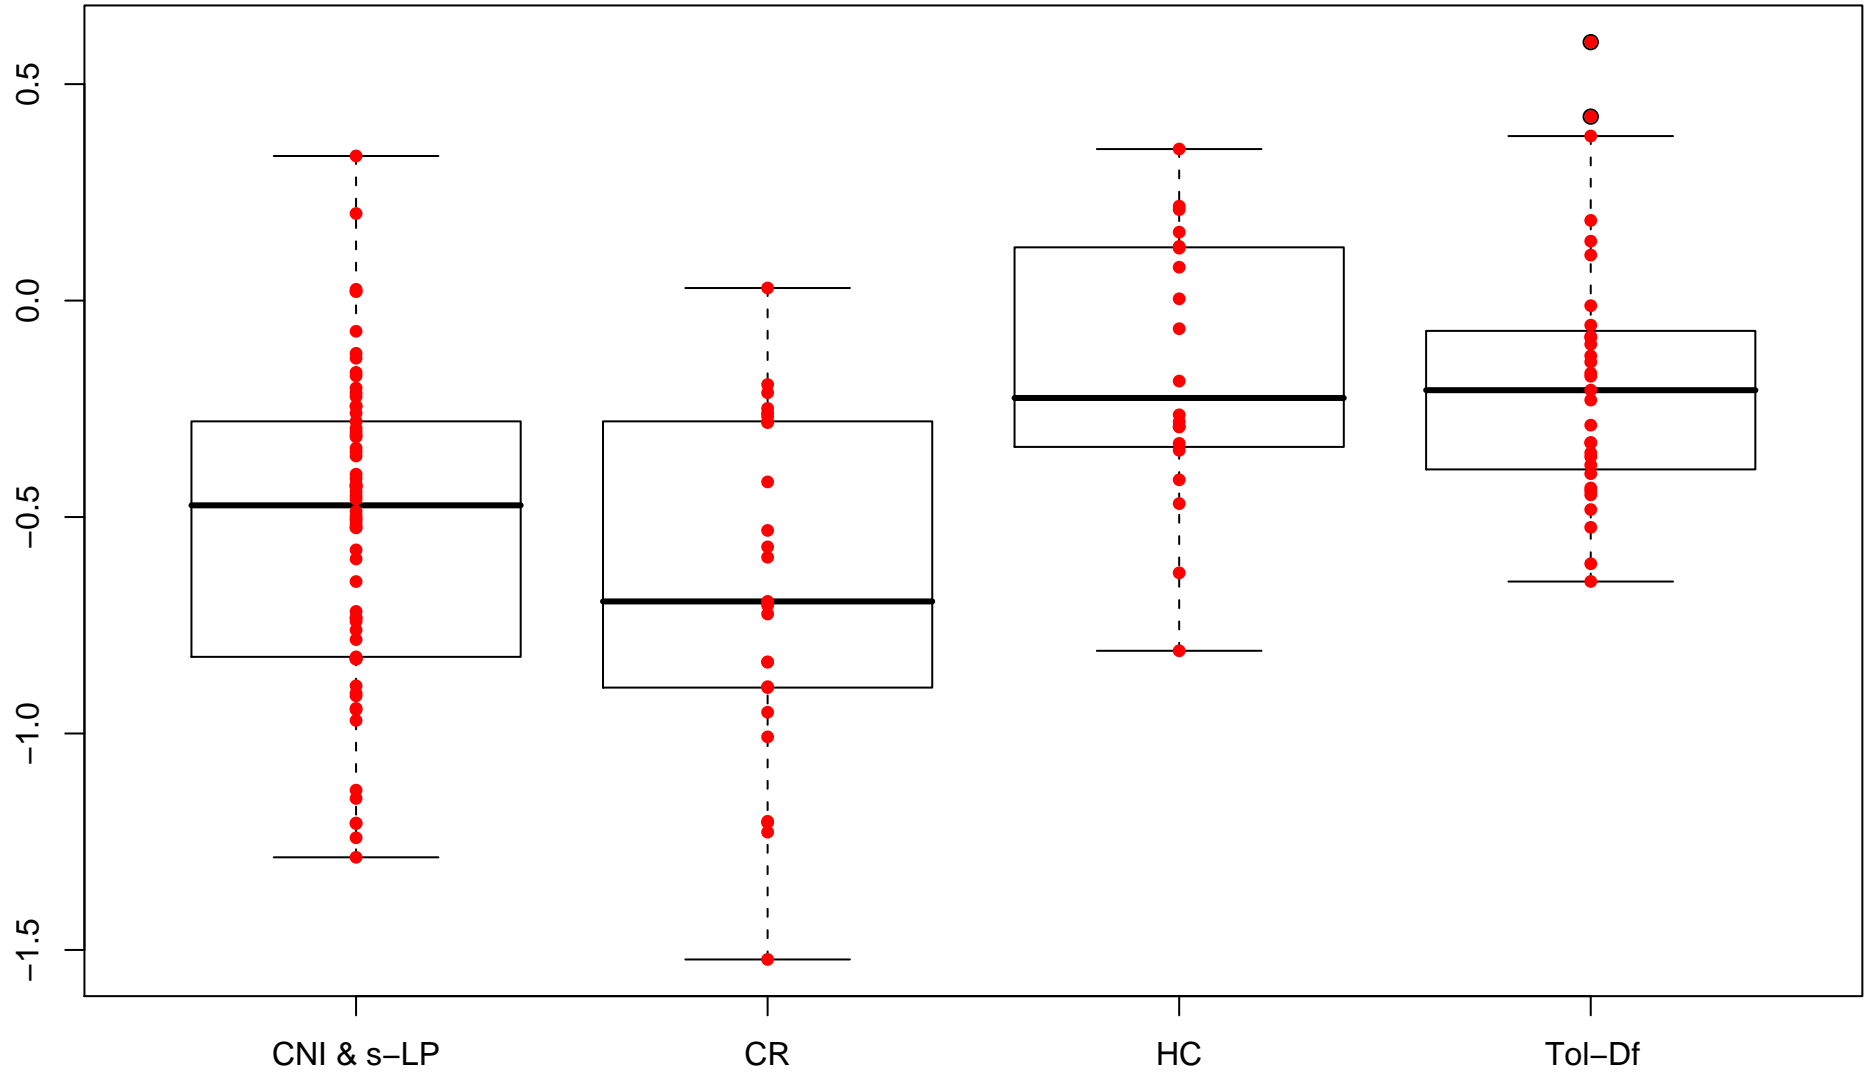

Rank 97 : TLR5  
4.674e-07

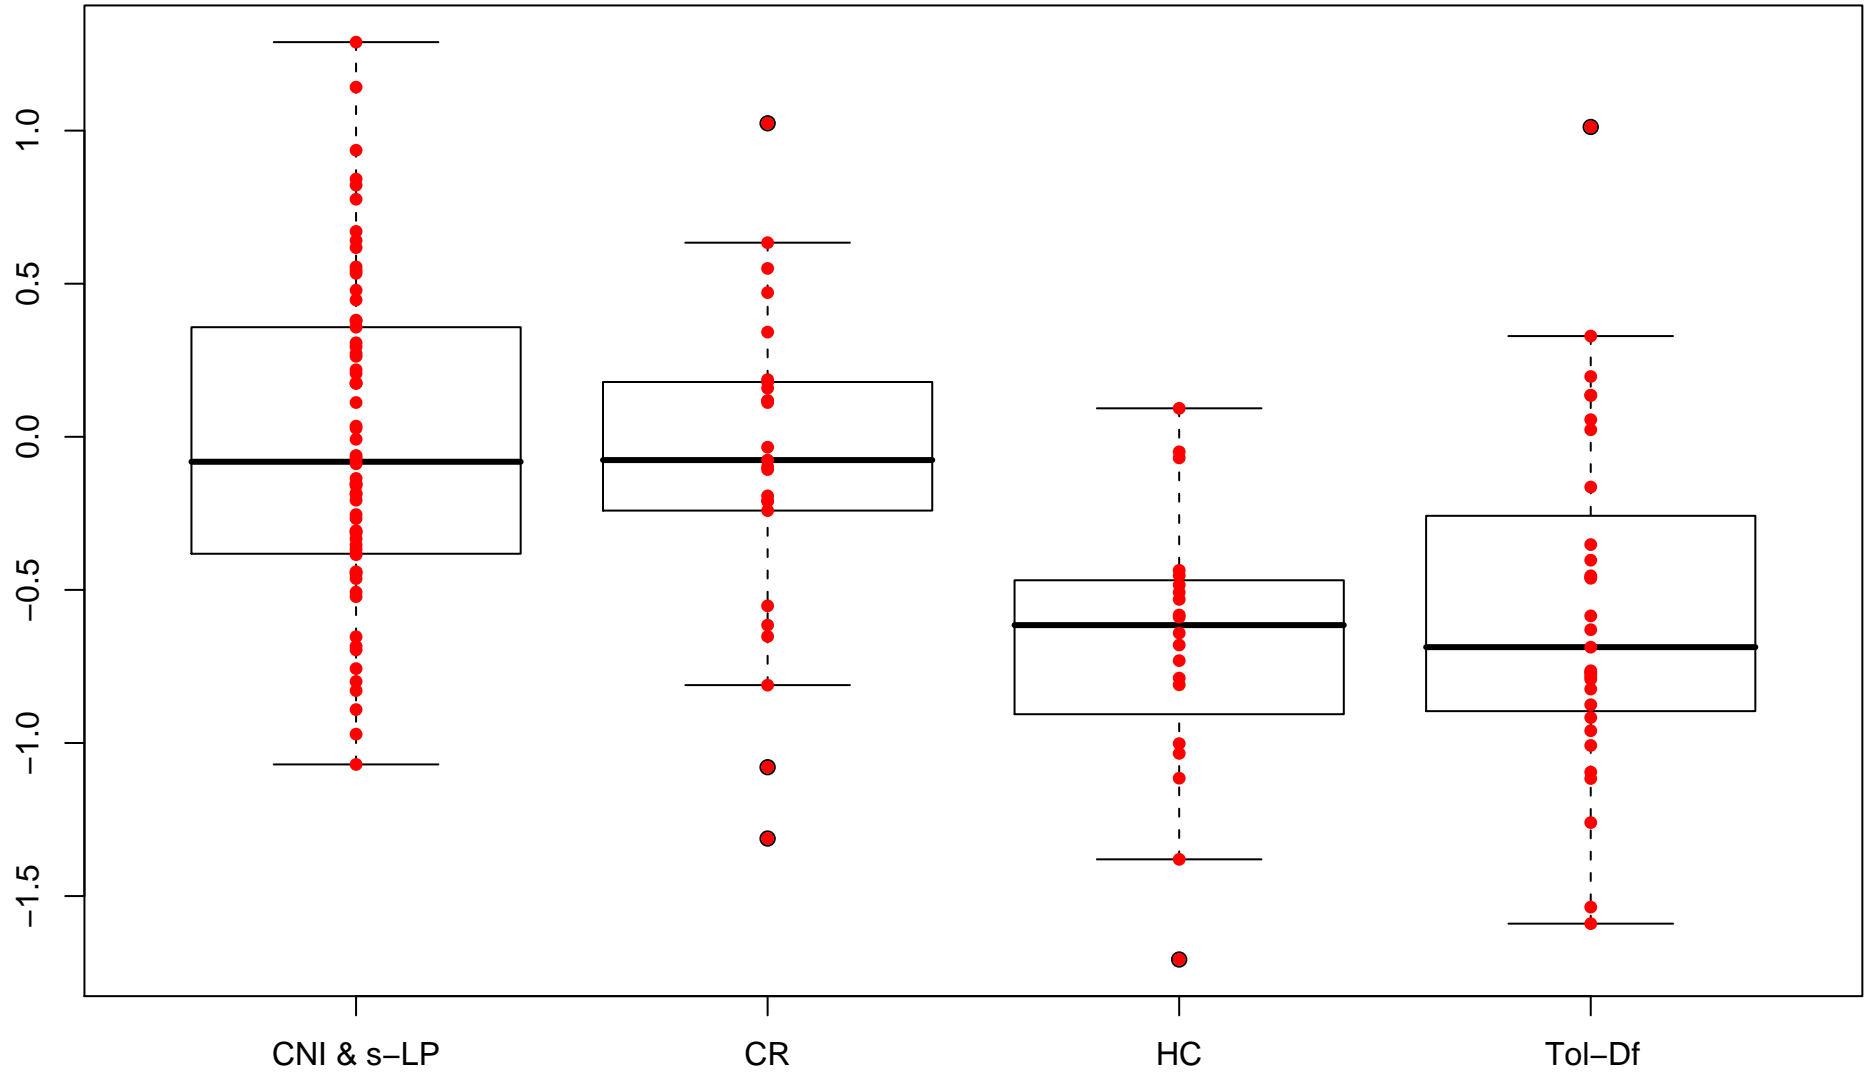

Rank 98 : MAGEH1  
4.772e-07

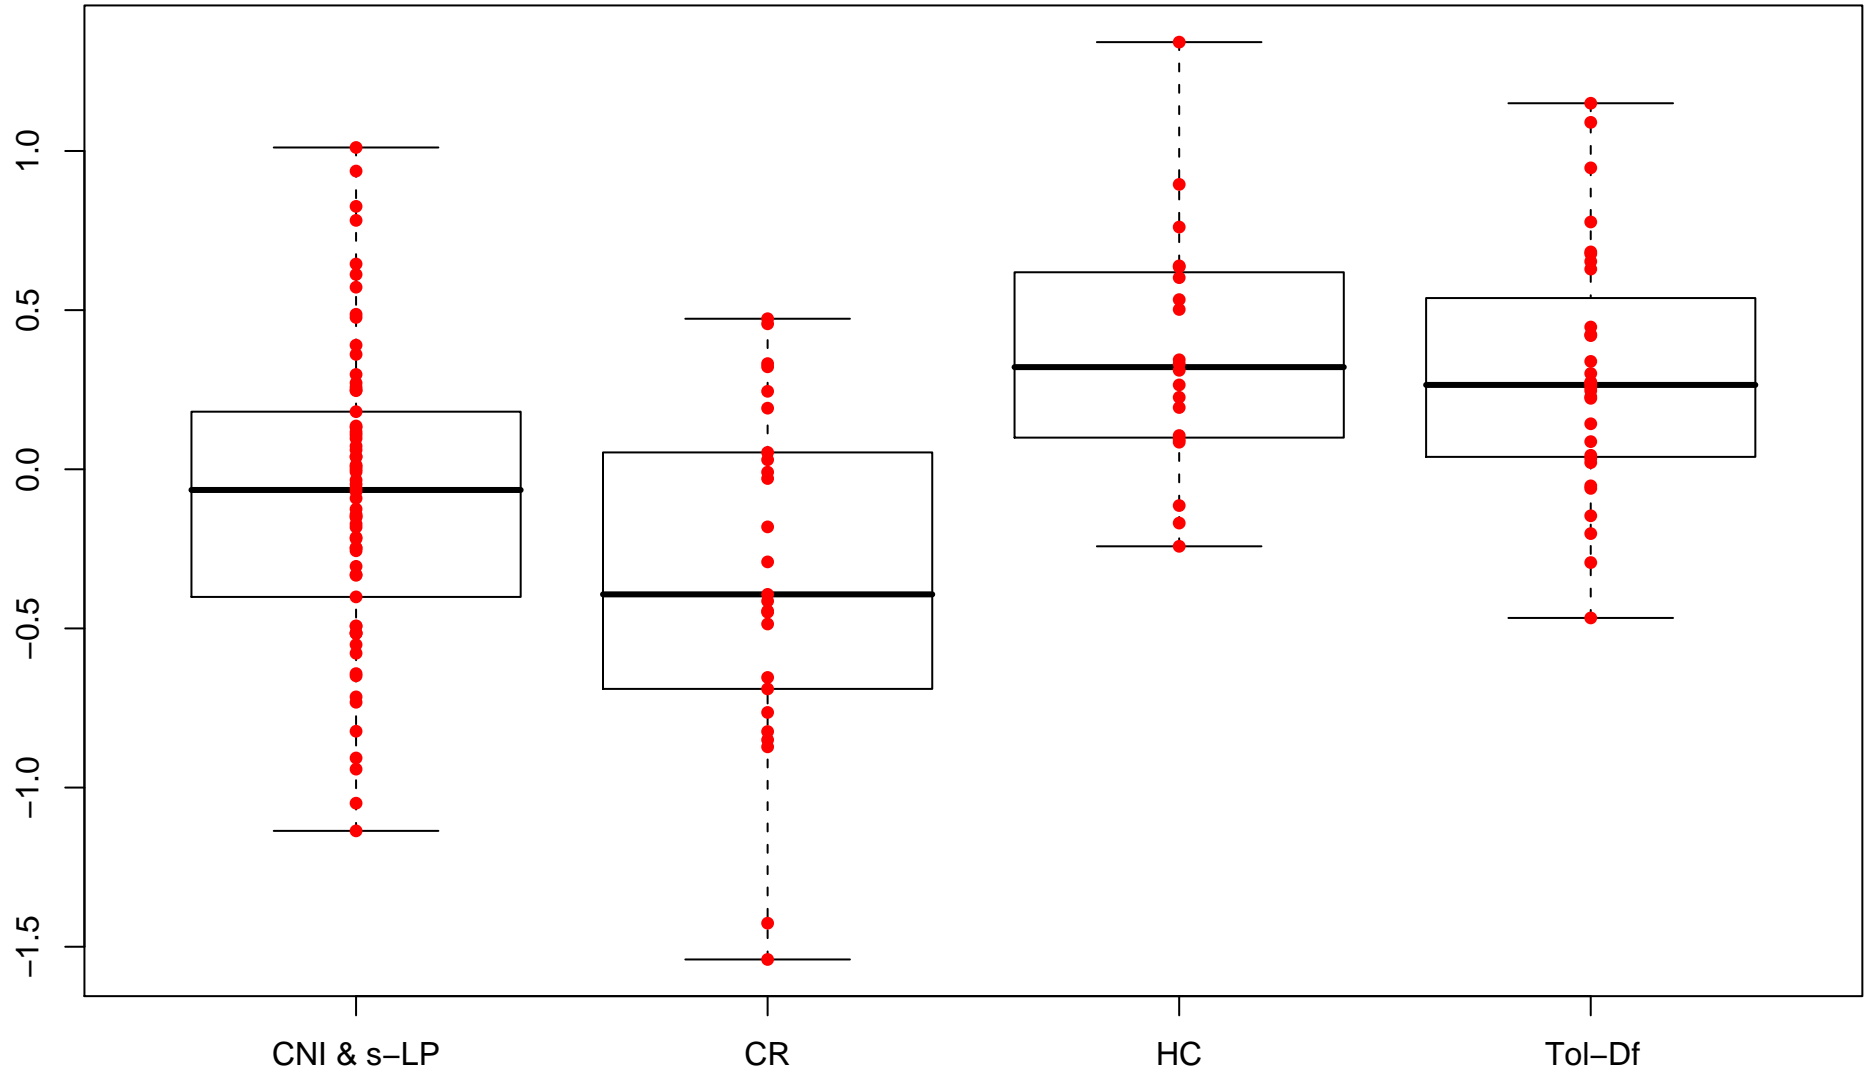

Rank 99 : ITK  
4.922e-07

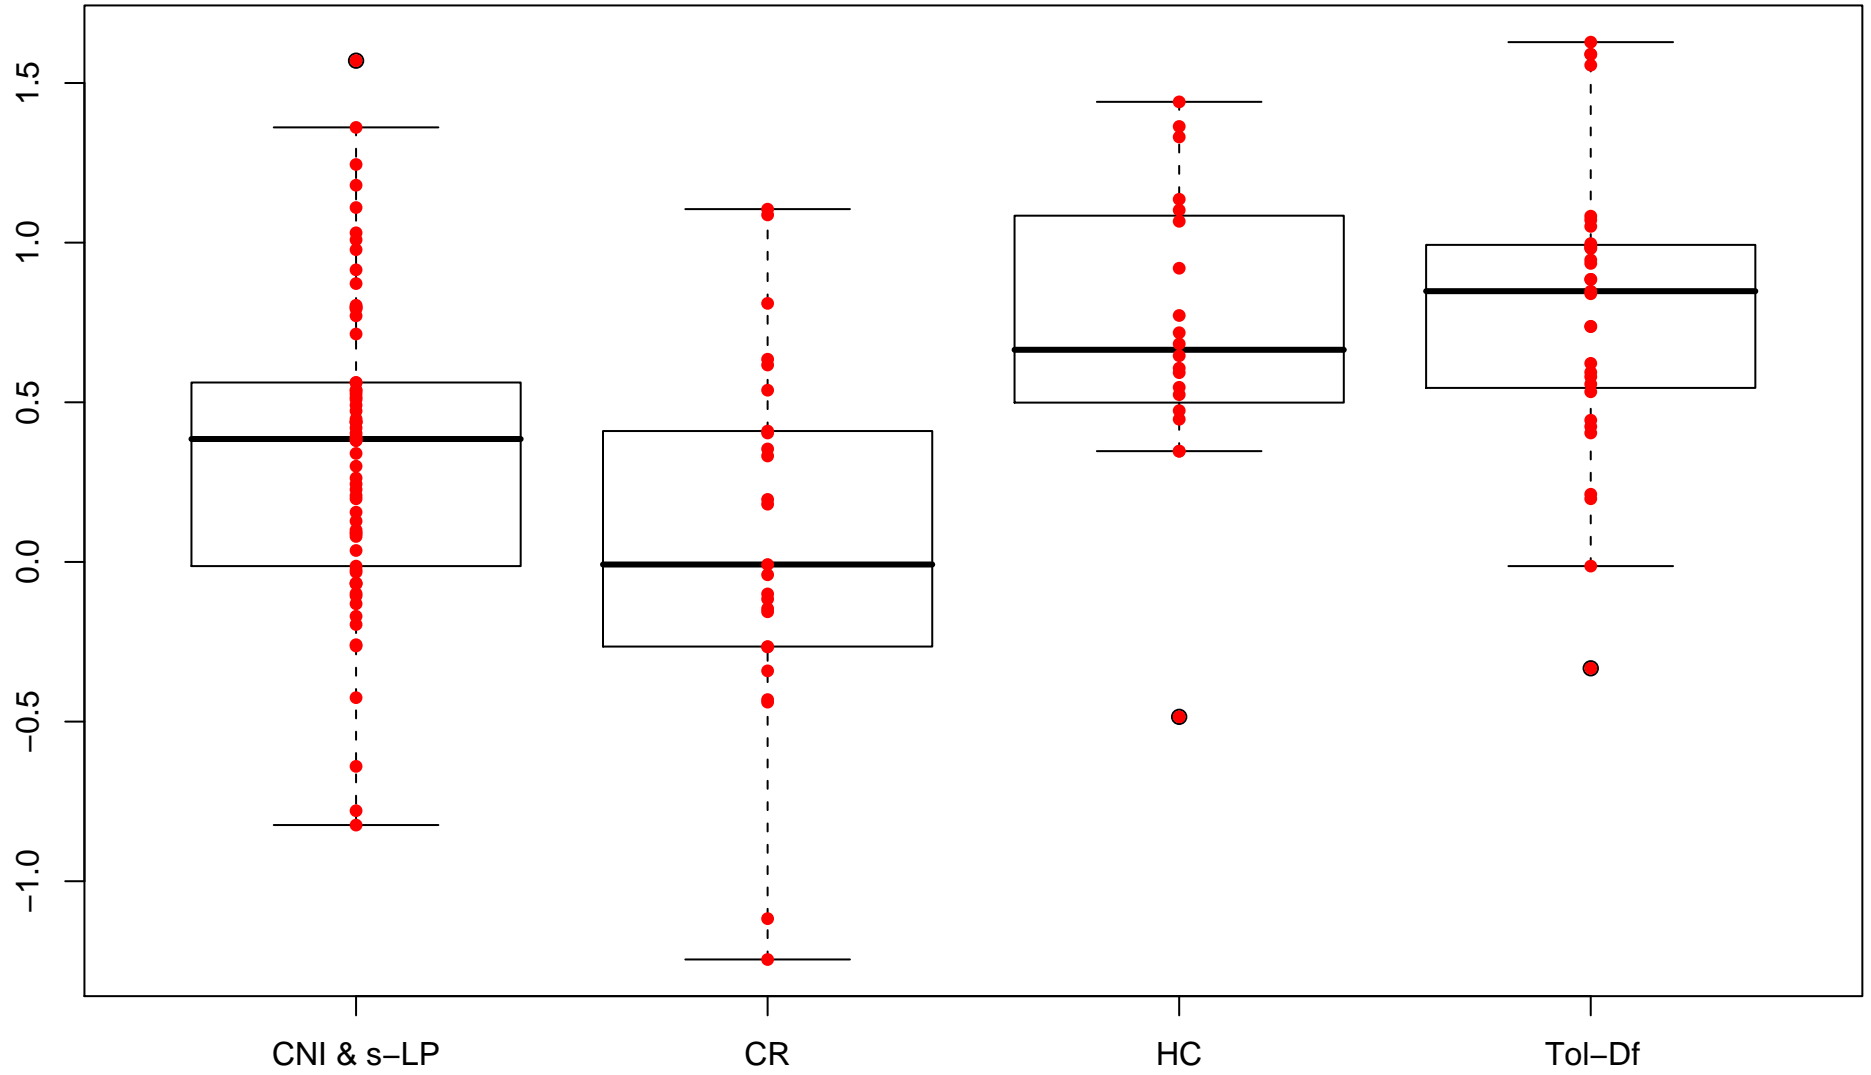

Rank 100 : GADD45A  
5.113e-07

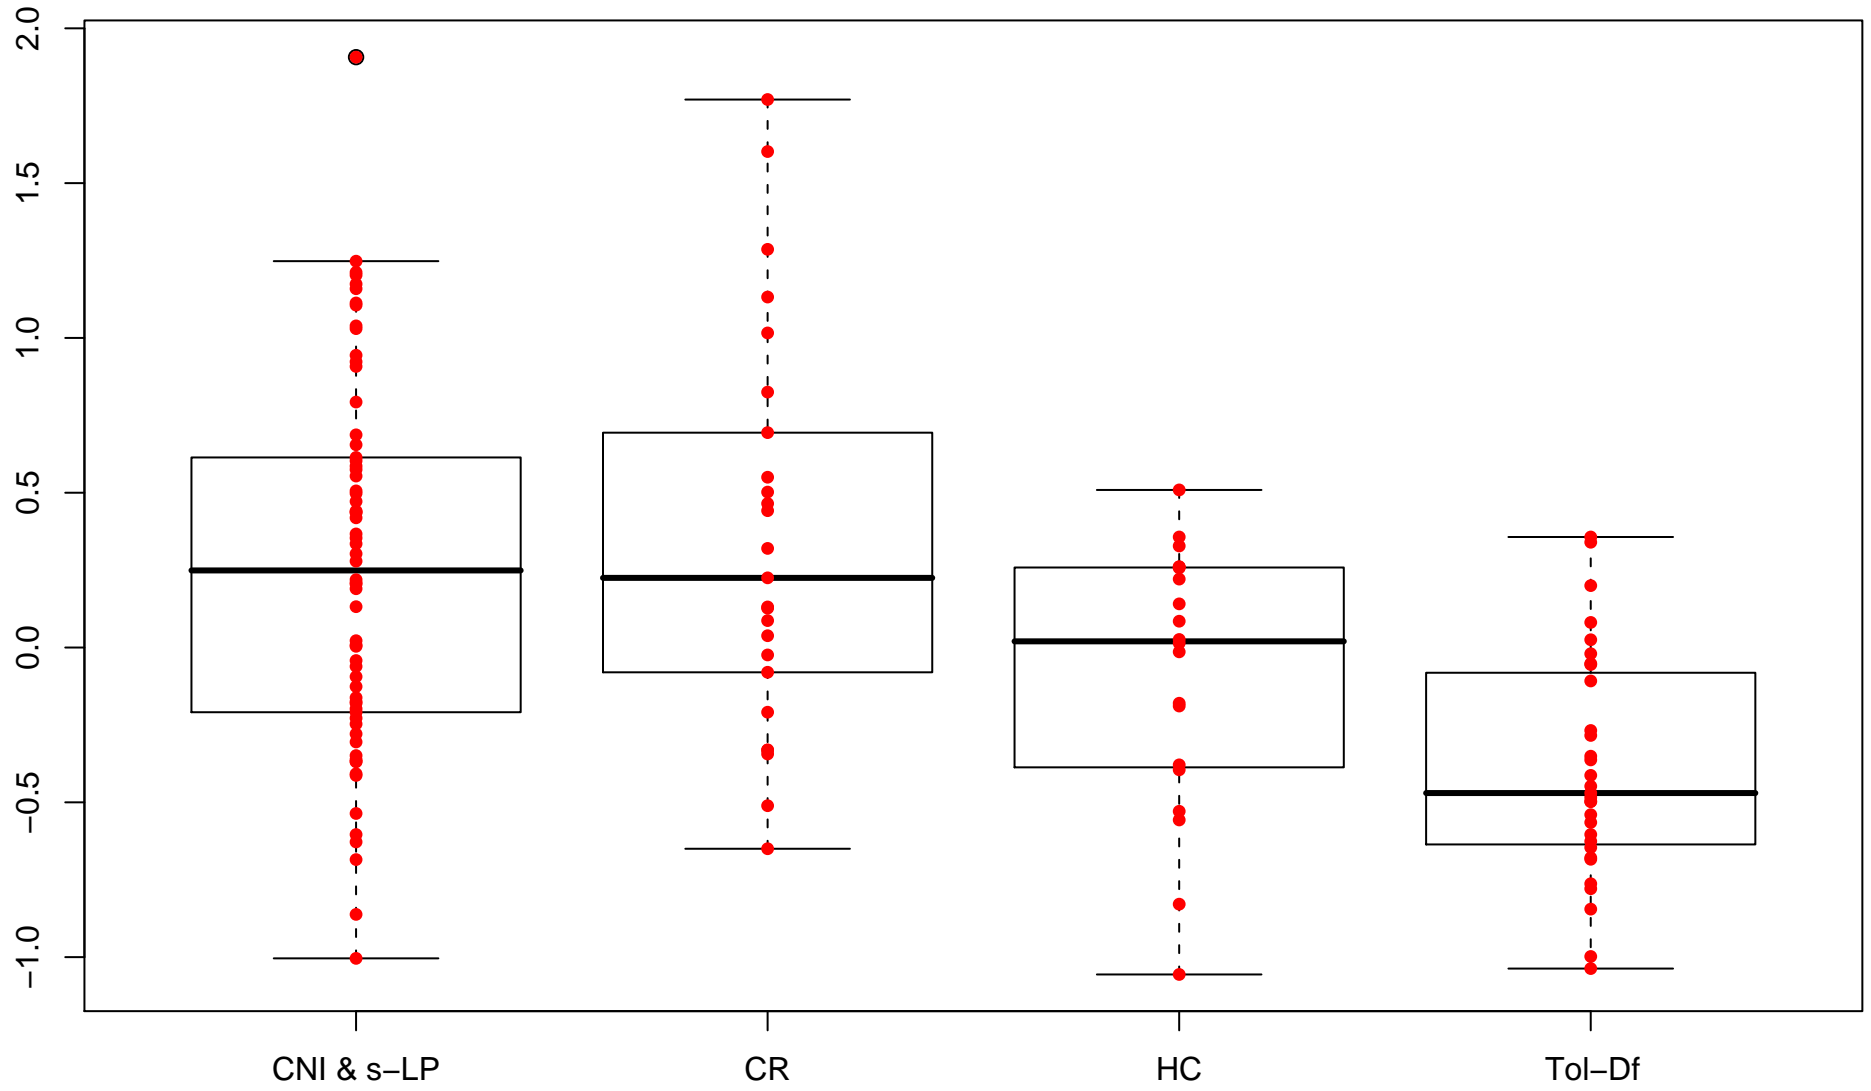

Rank 101 : FZD5  
5.368e-07

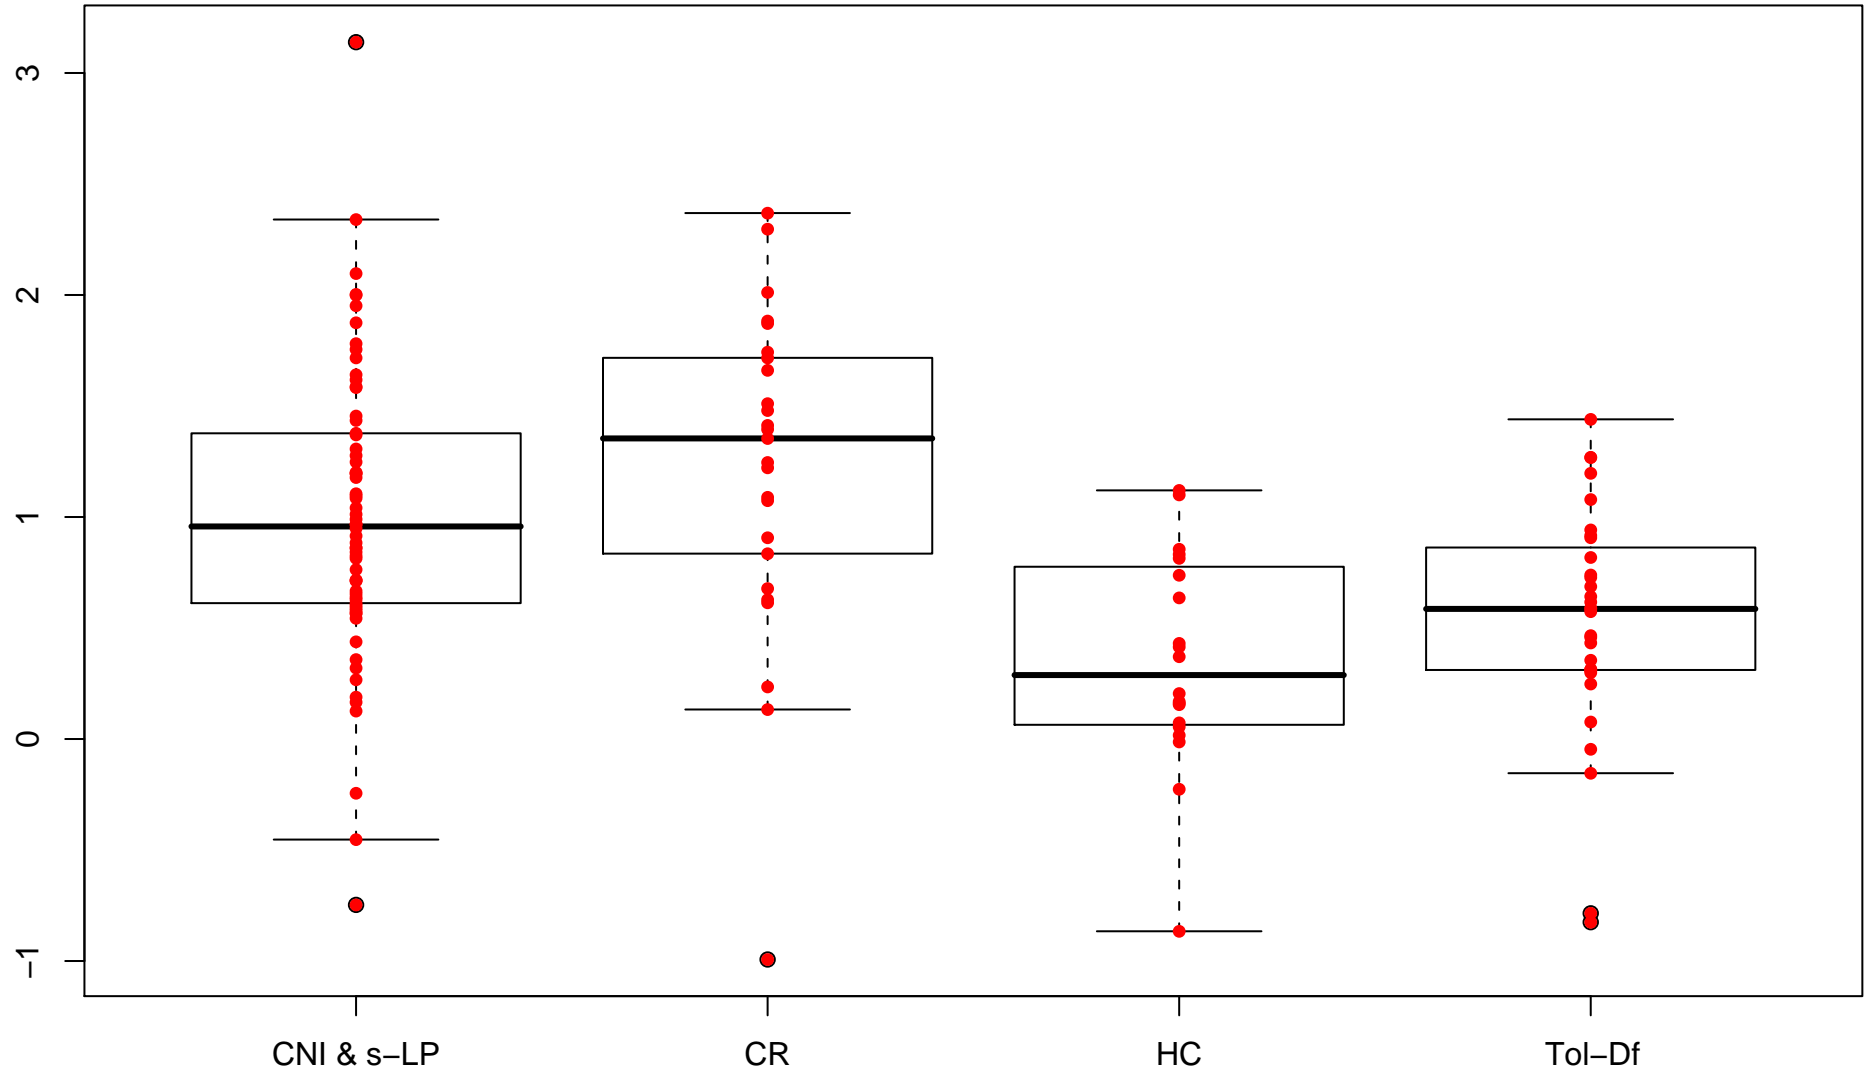

Rank 102 : EBF1  
5.41e-07

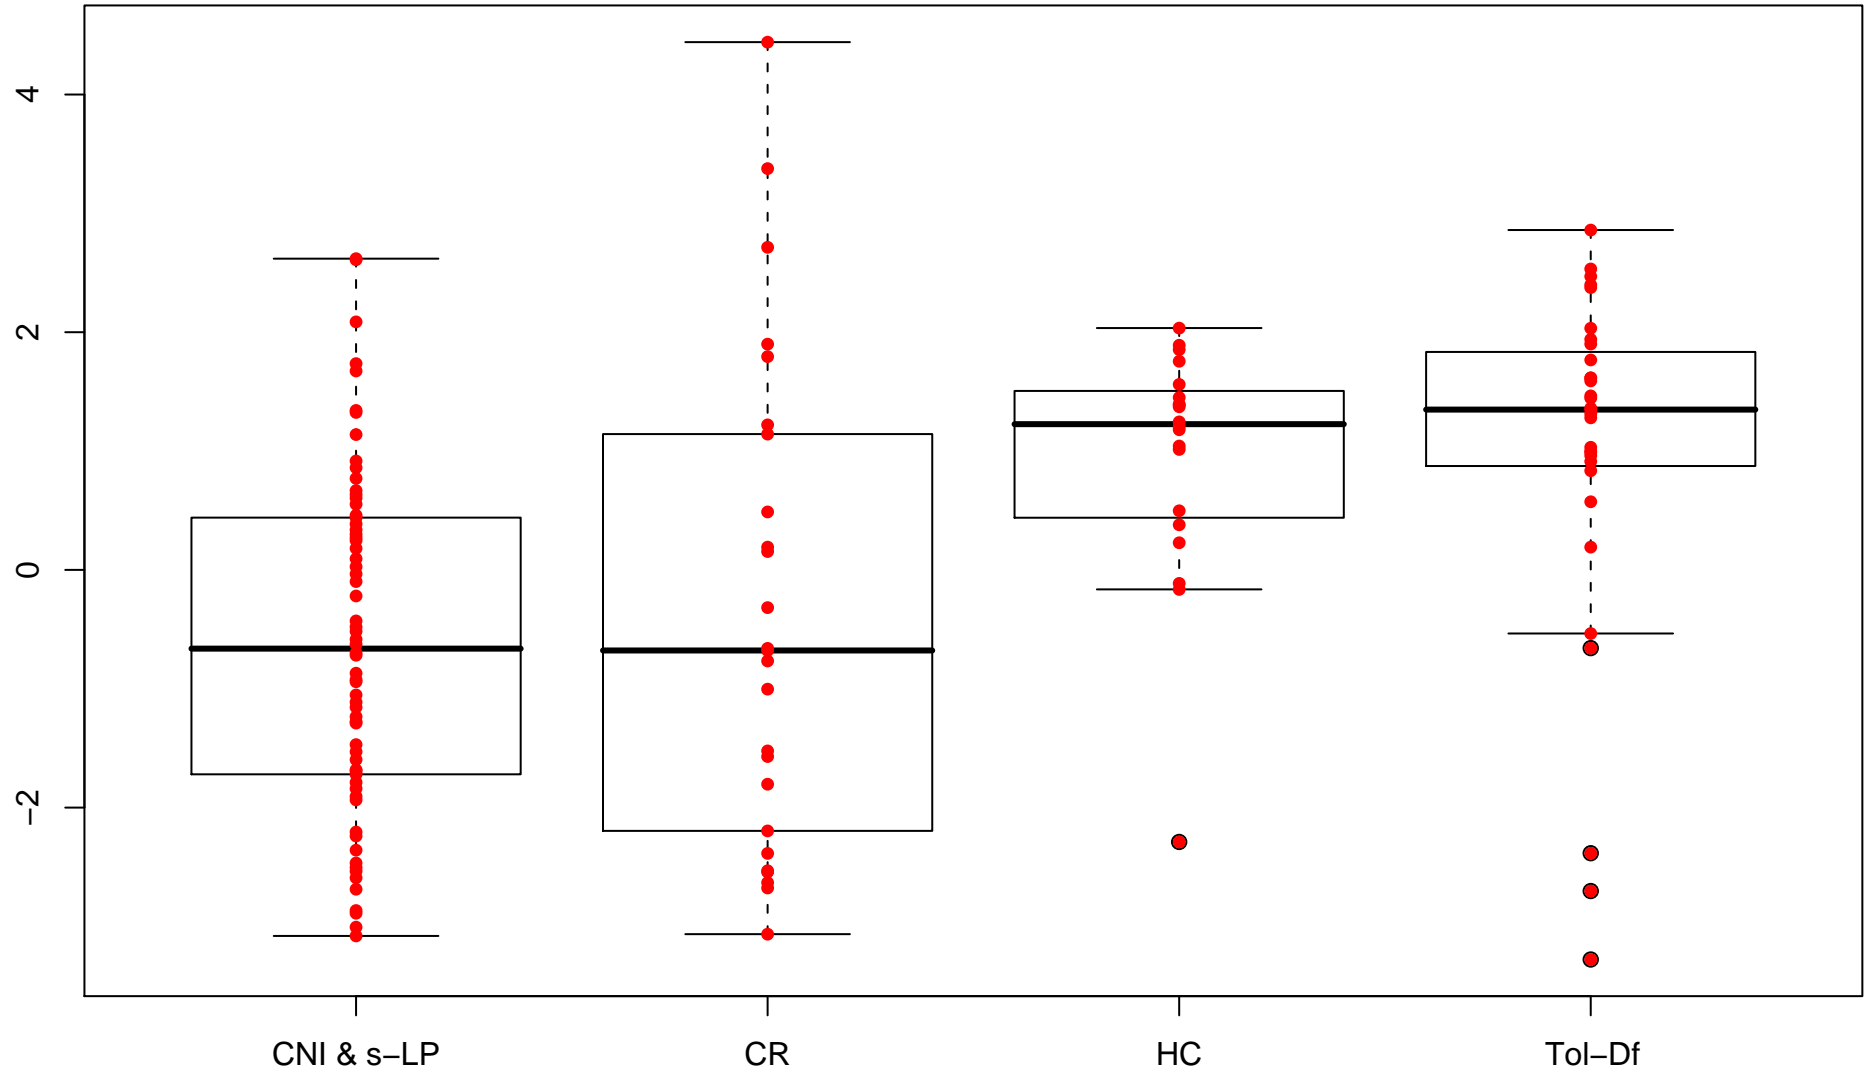

Rank 103 : SPON1  
5.637e-07

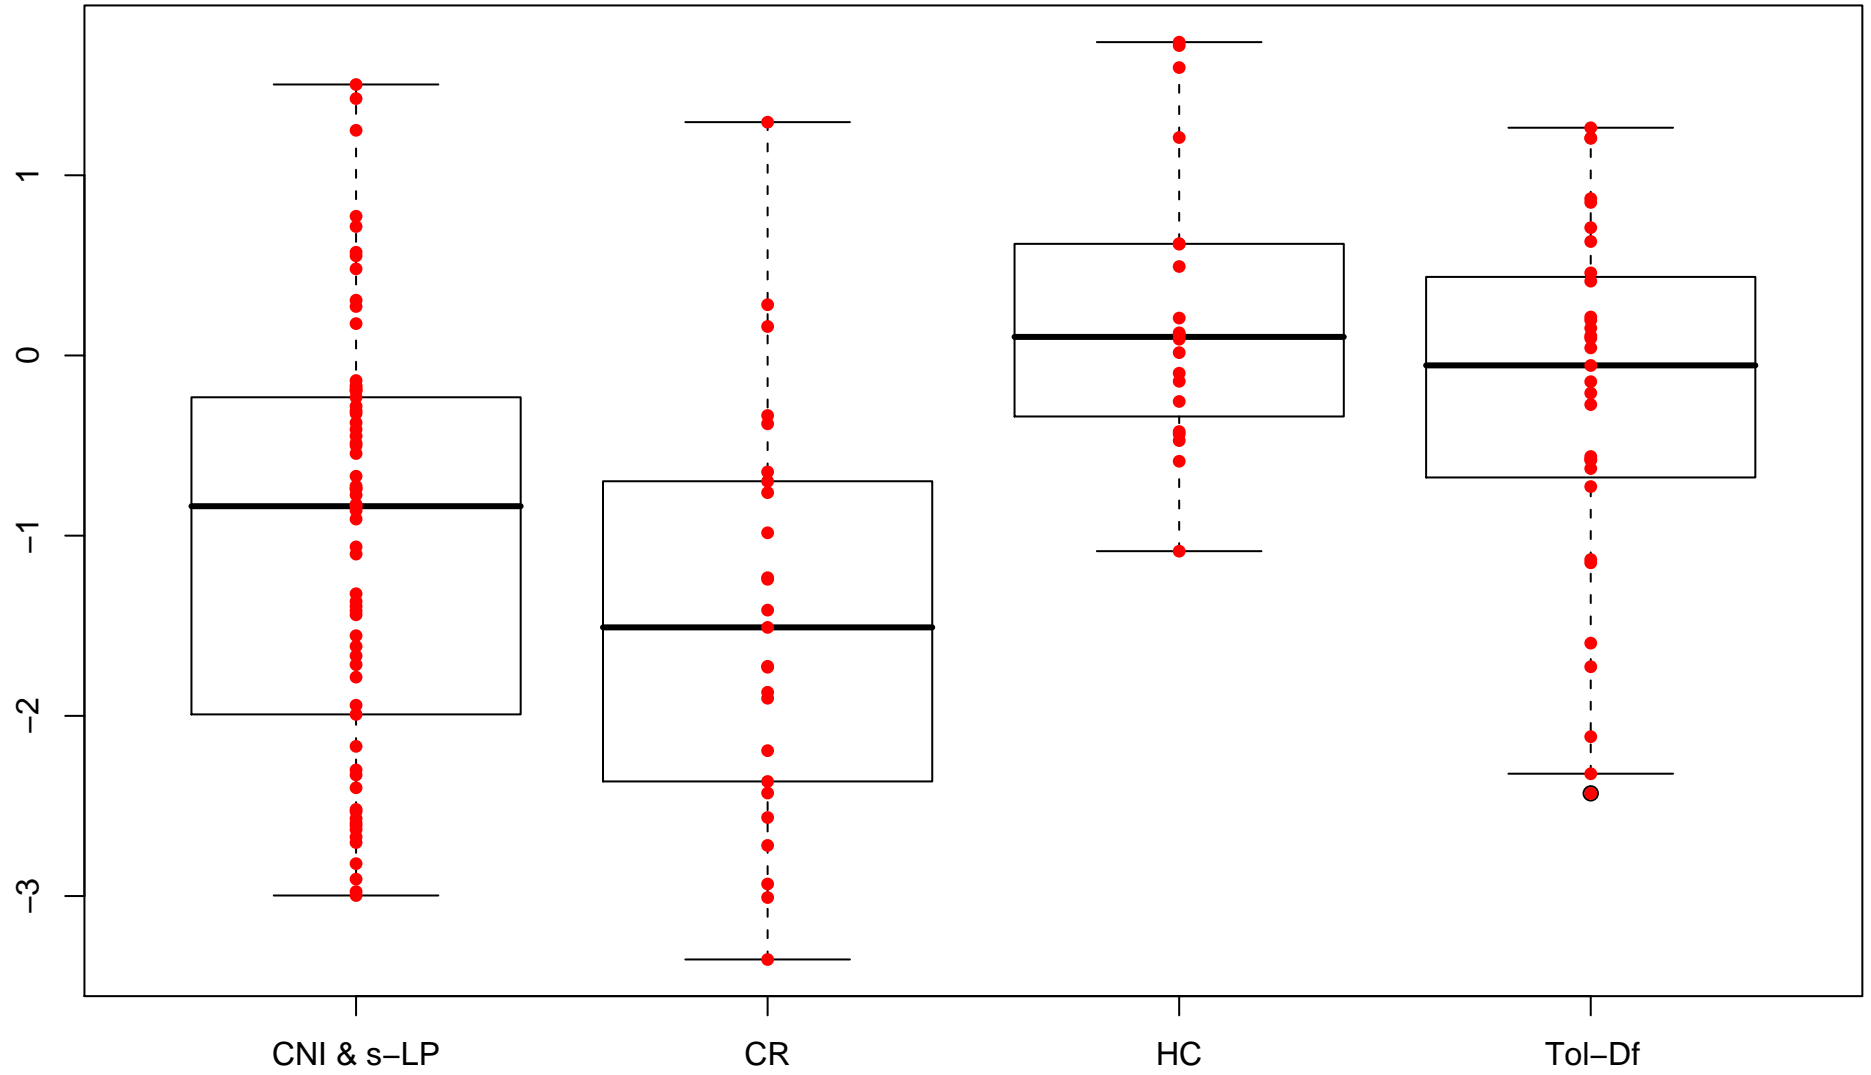



Rank 104 : RPS21  
5.653e-07

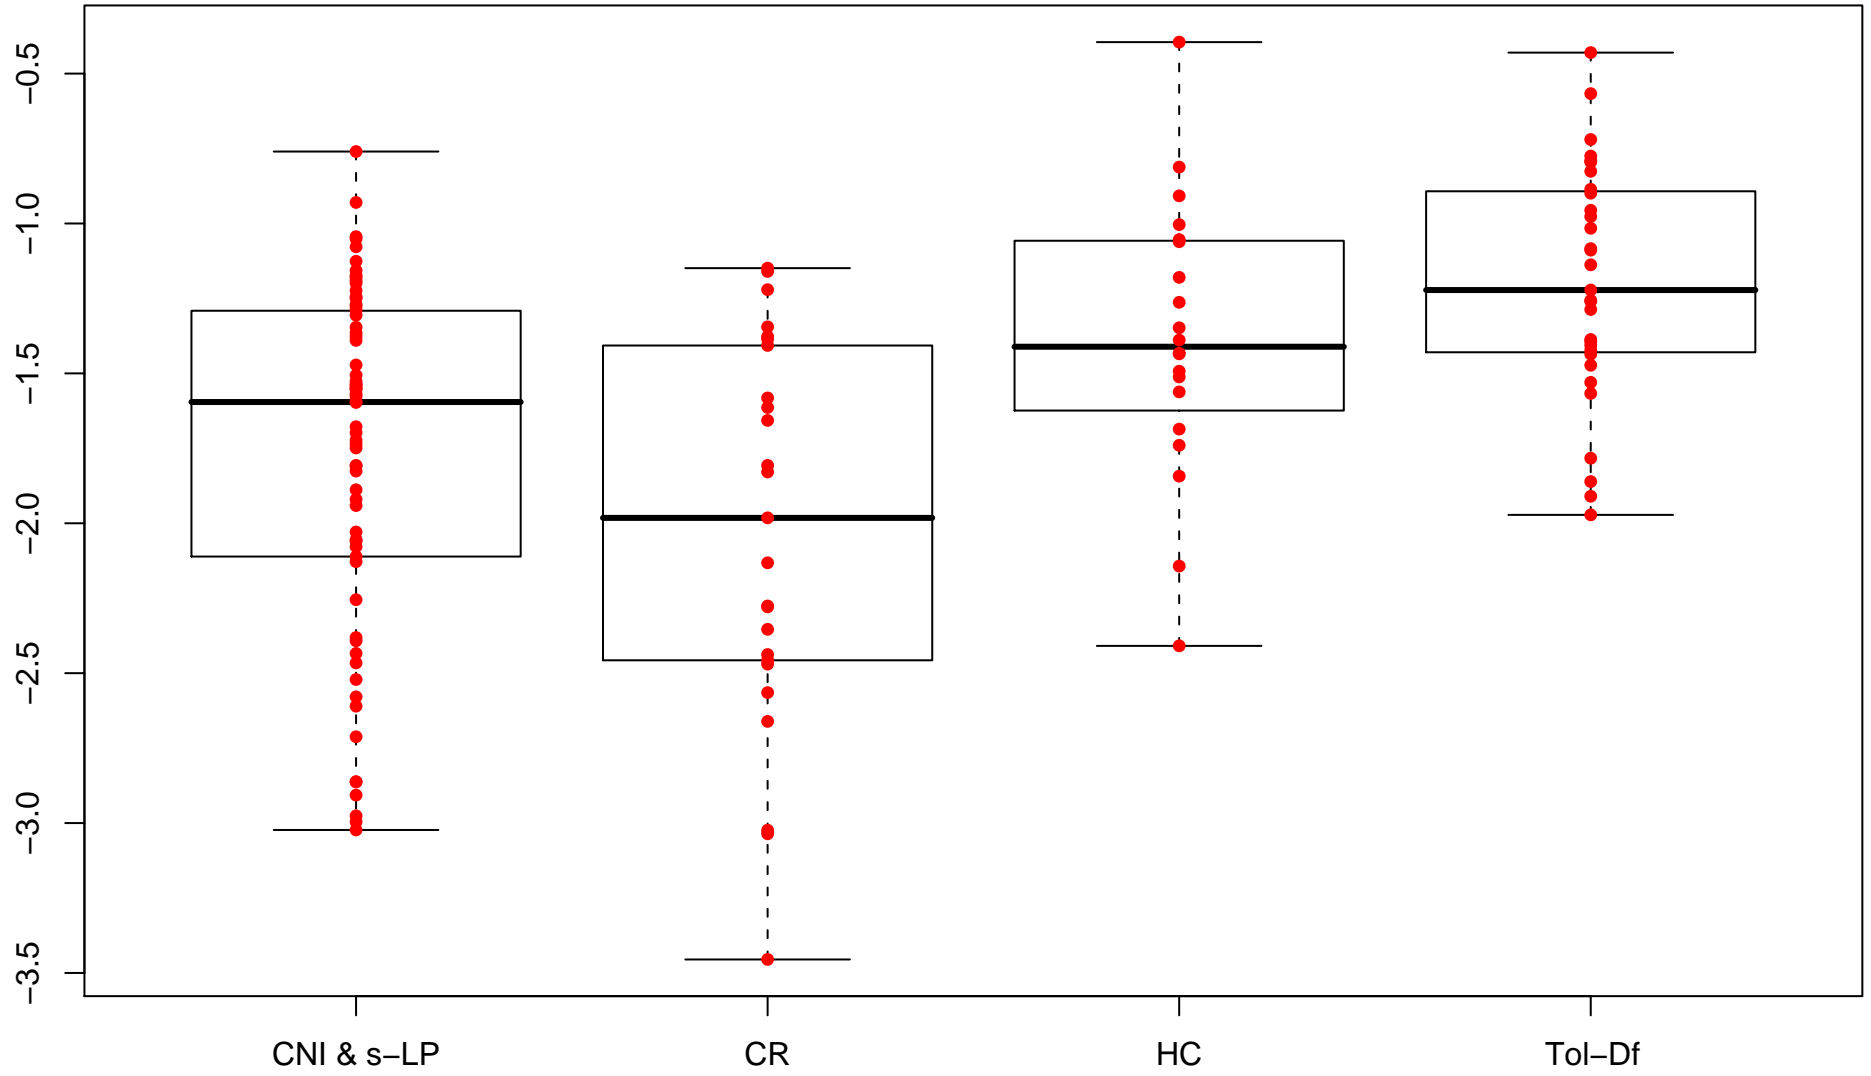

Rank 105 : EBF1  
6.159e-07

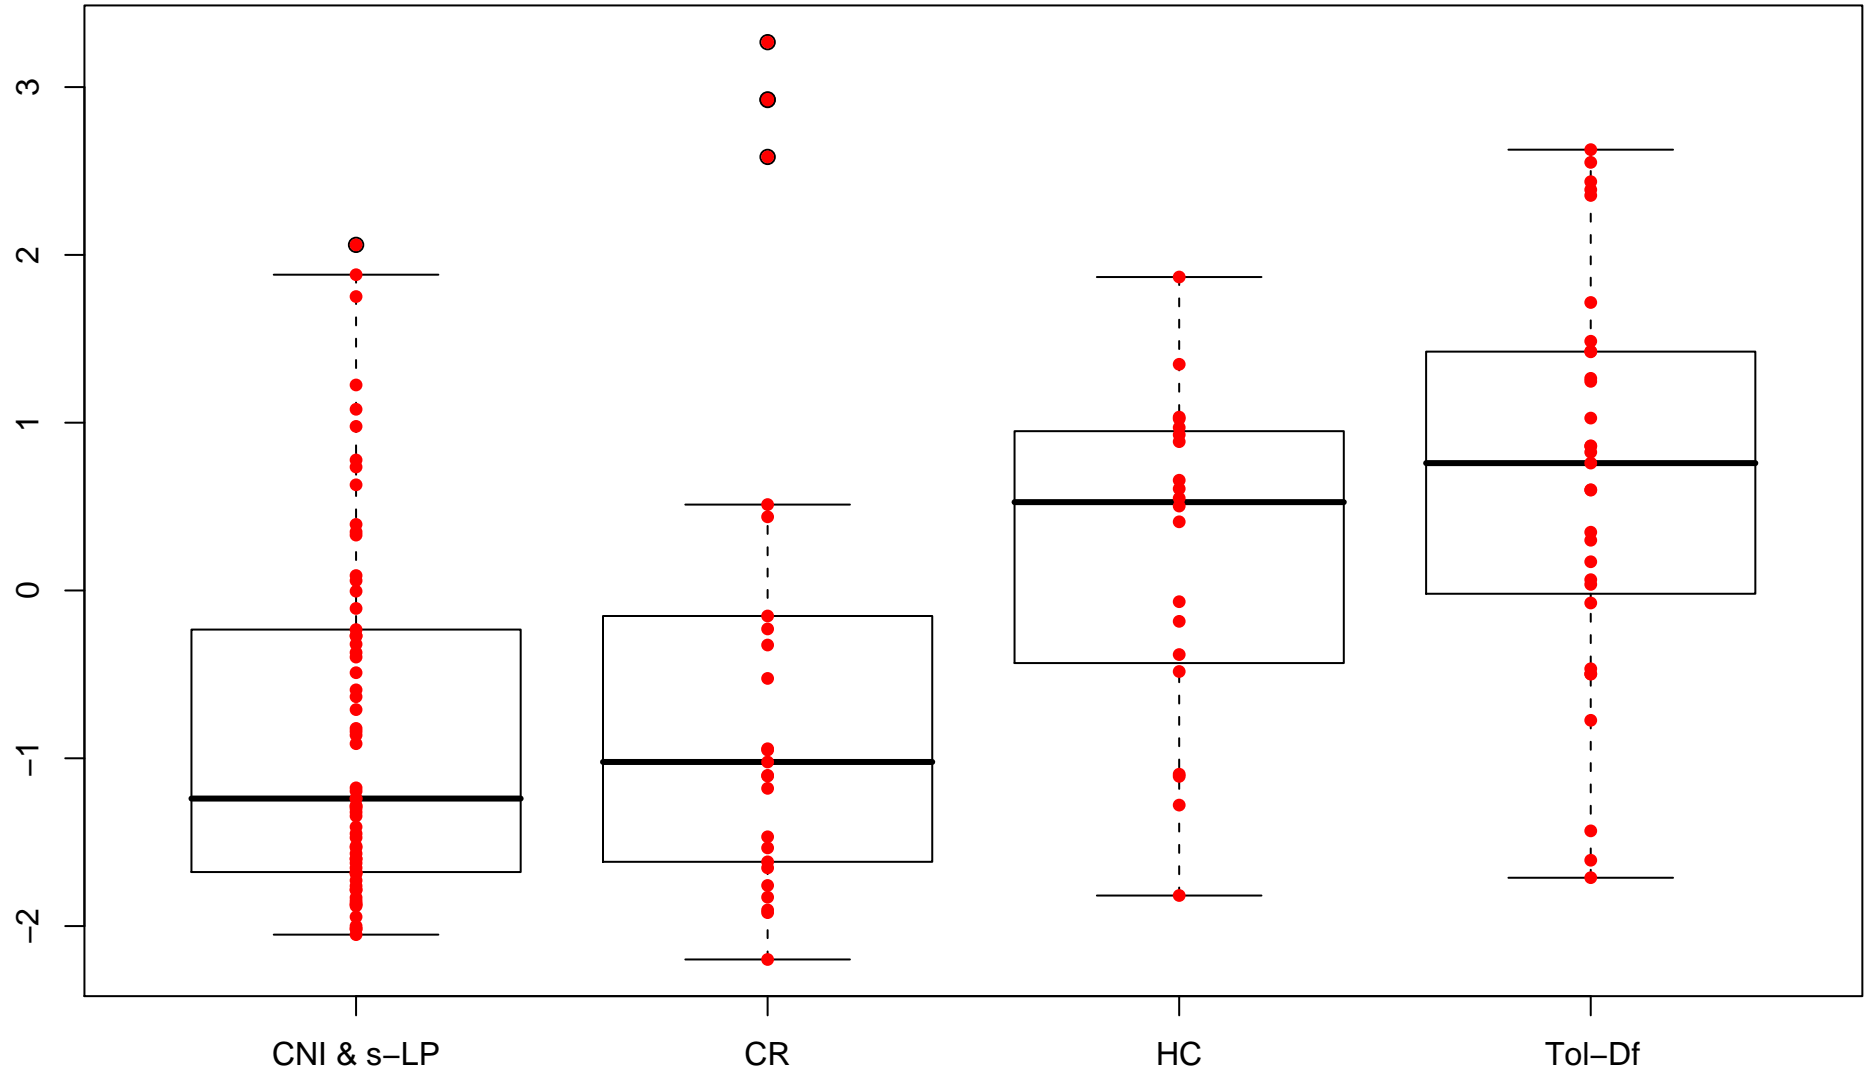

Rank 106 : AKR1C3  
6.555e-07

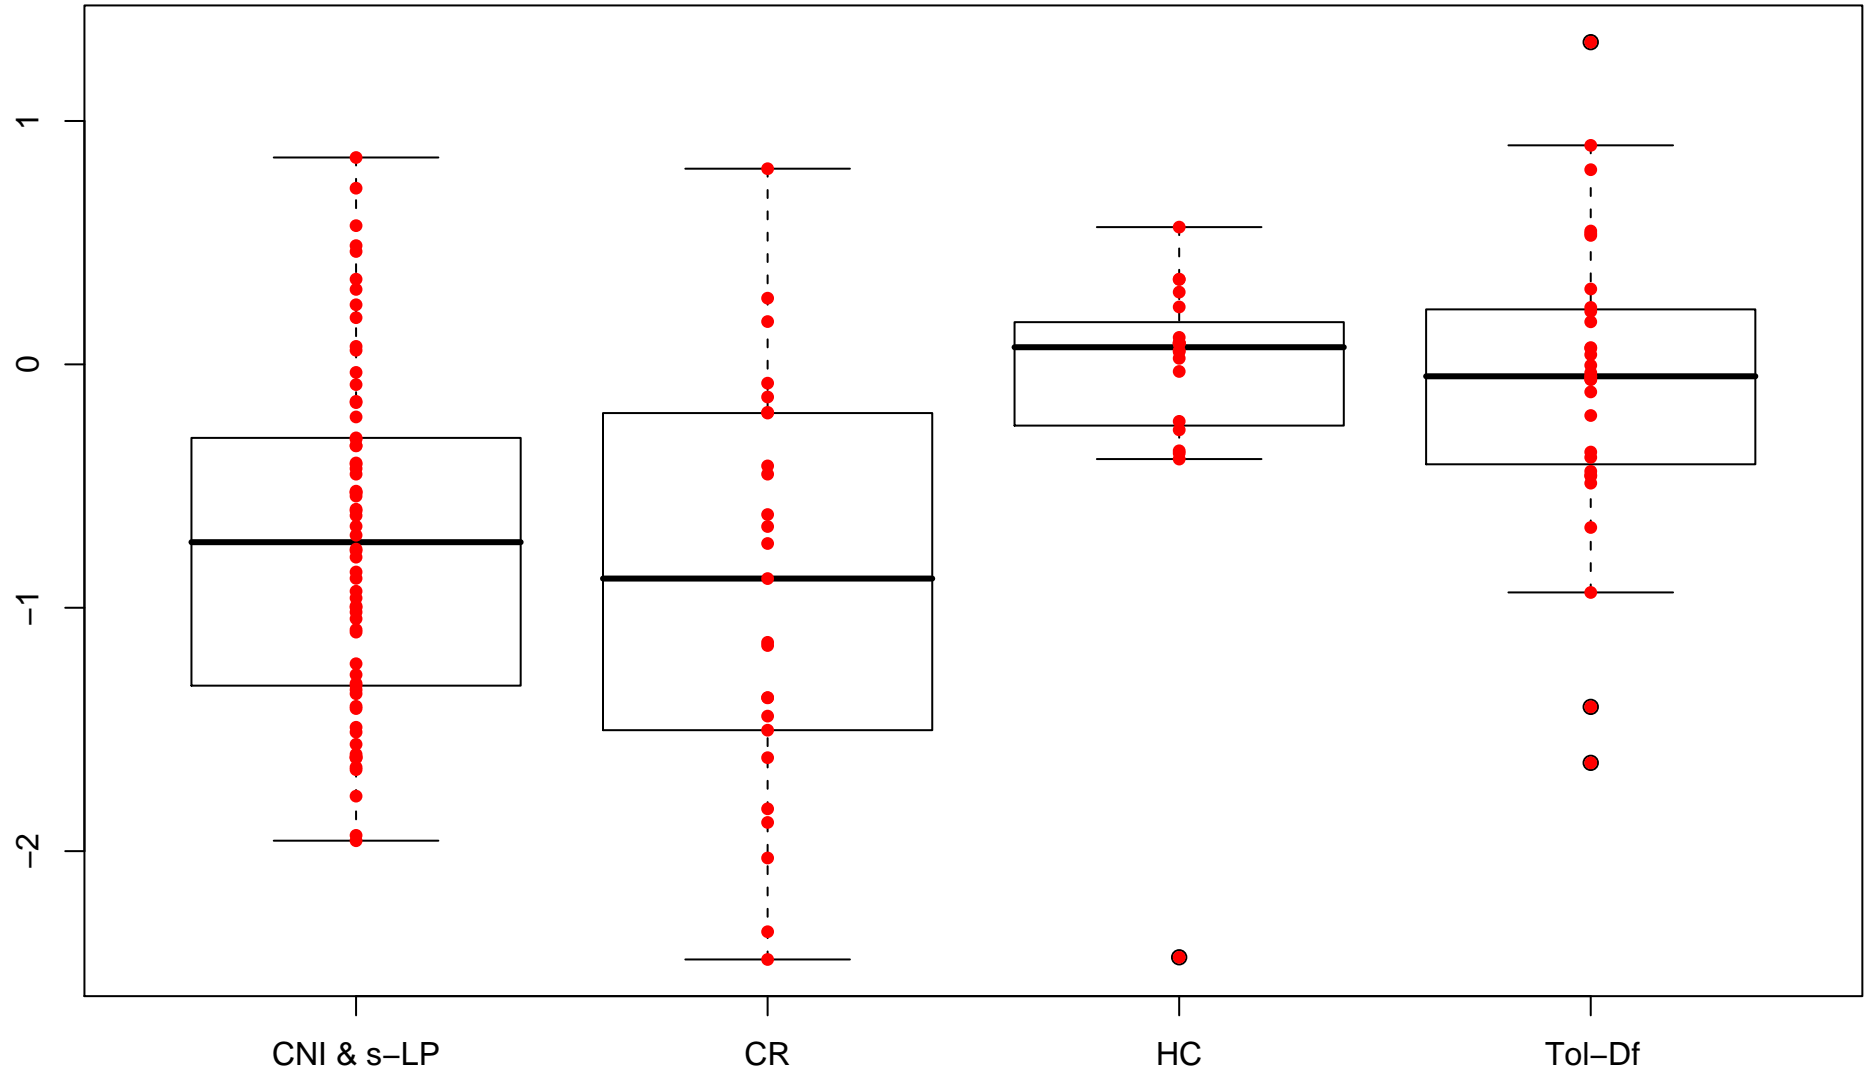

Rank 107 : OLIG2  
6.632e-07

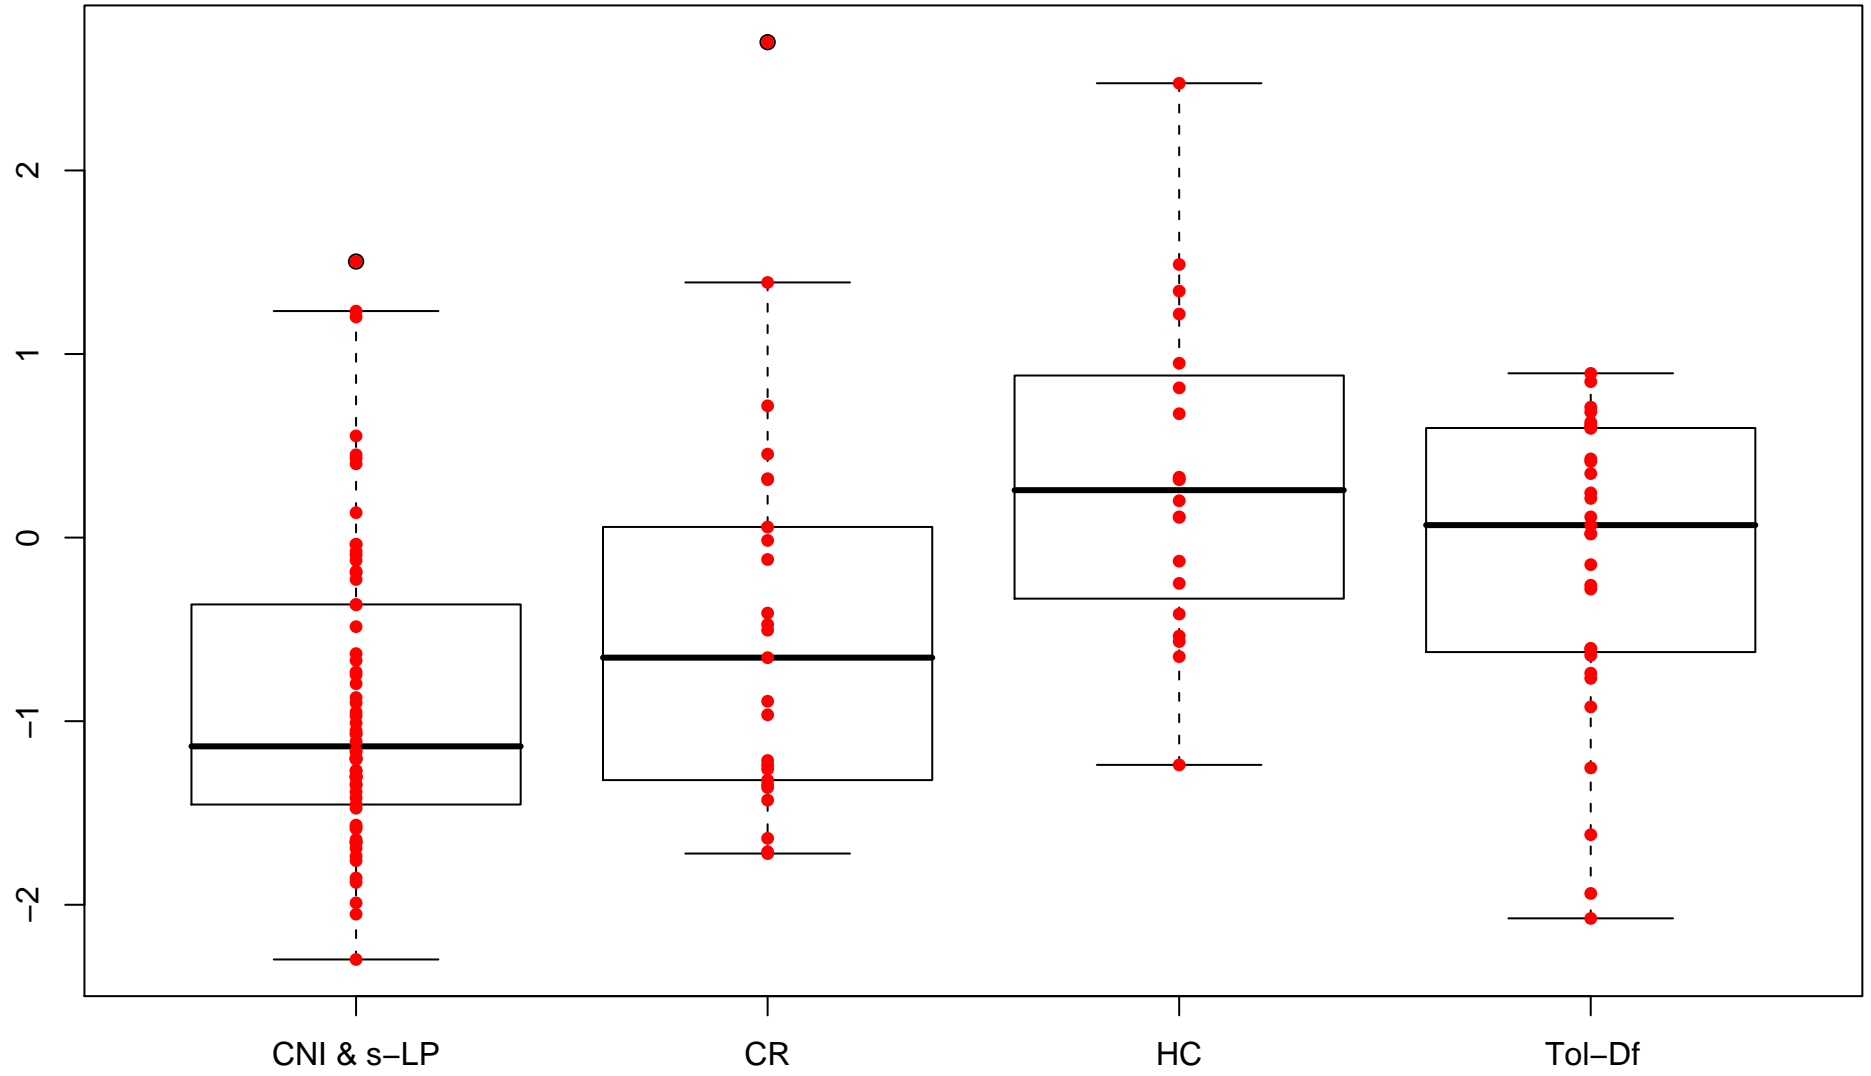

Rank 108 : RPA3  
6.644e-07

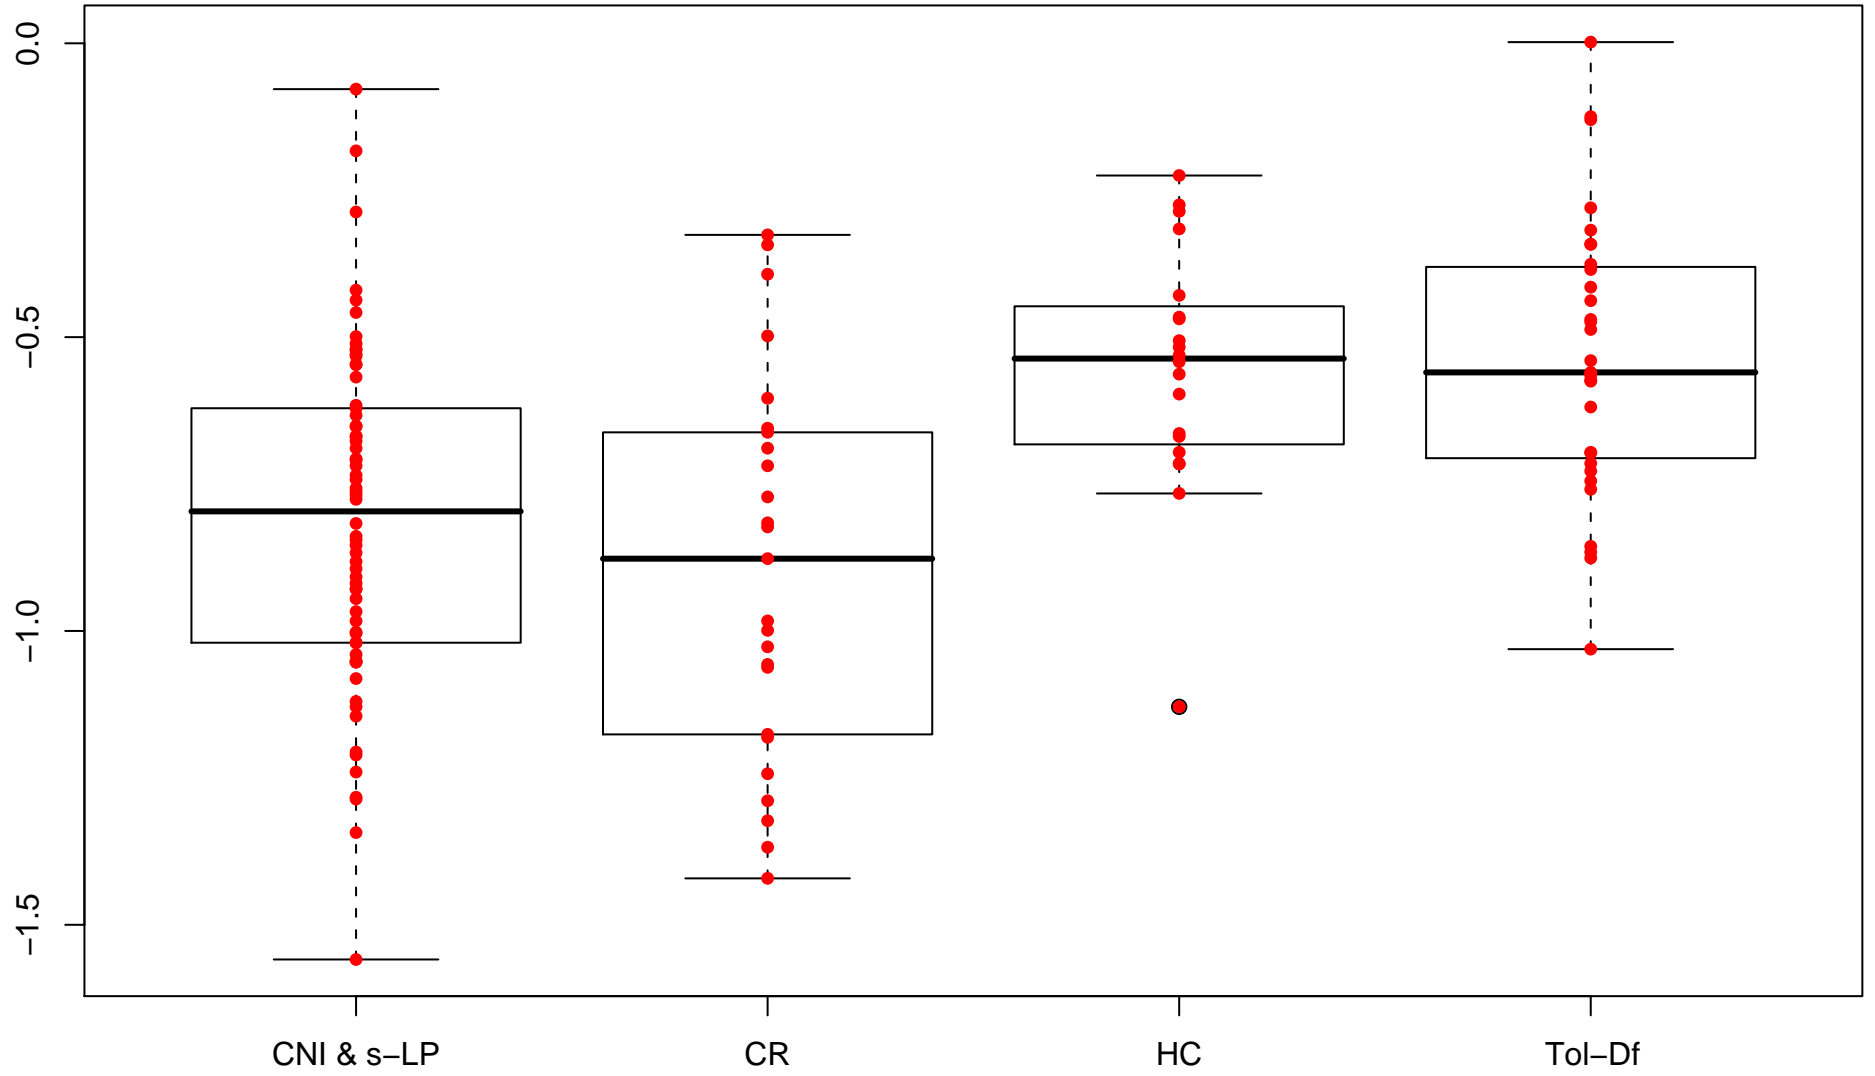

Rank 109 : EDG1  
7.713e-07

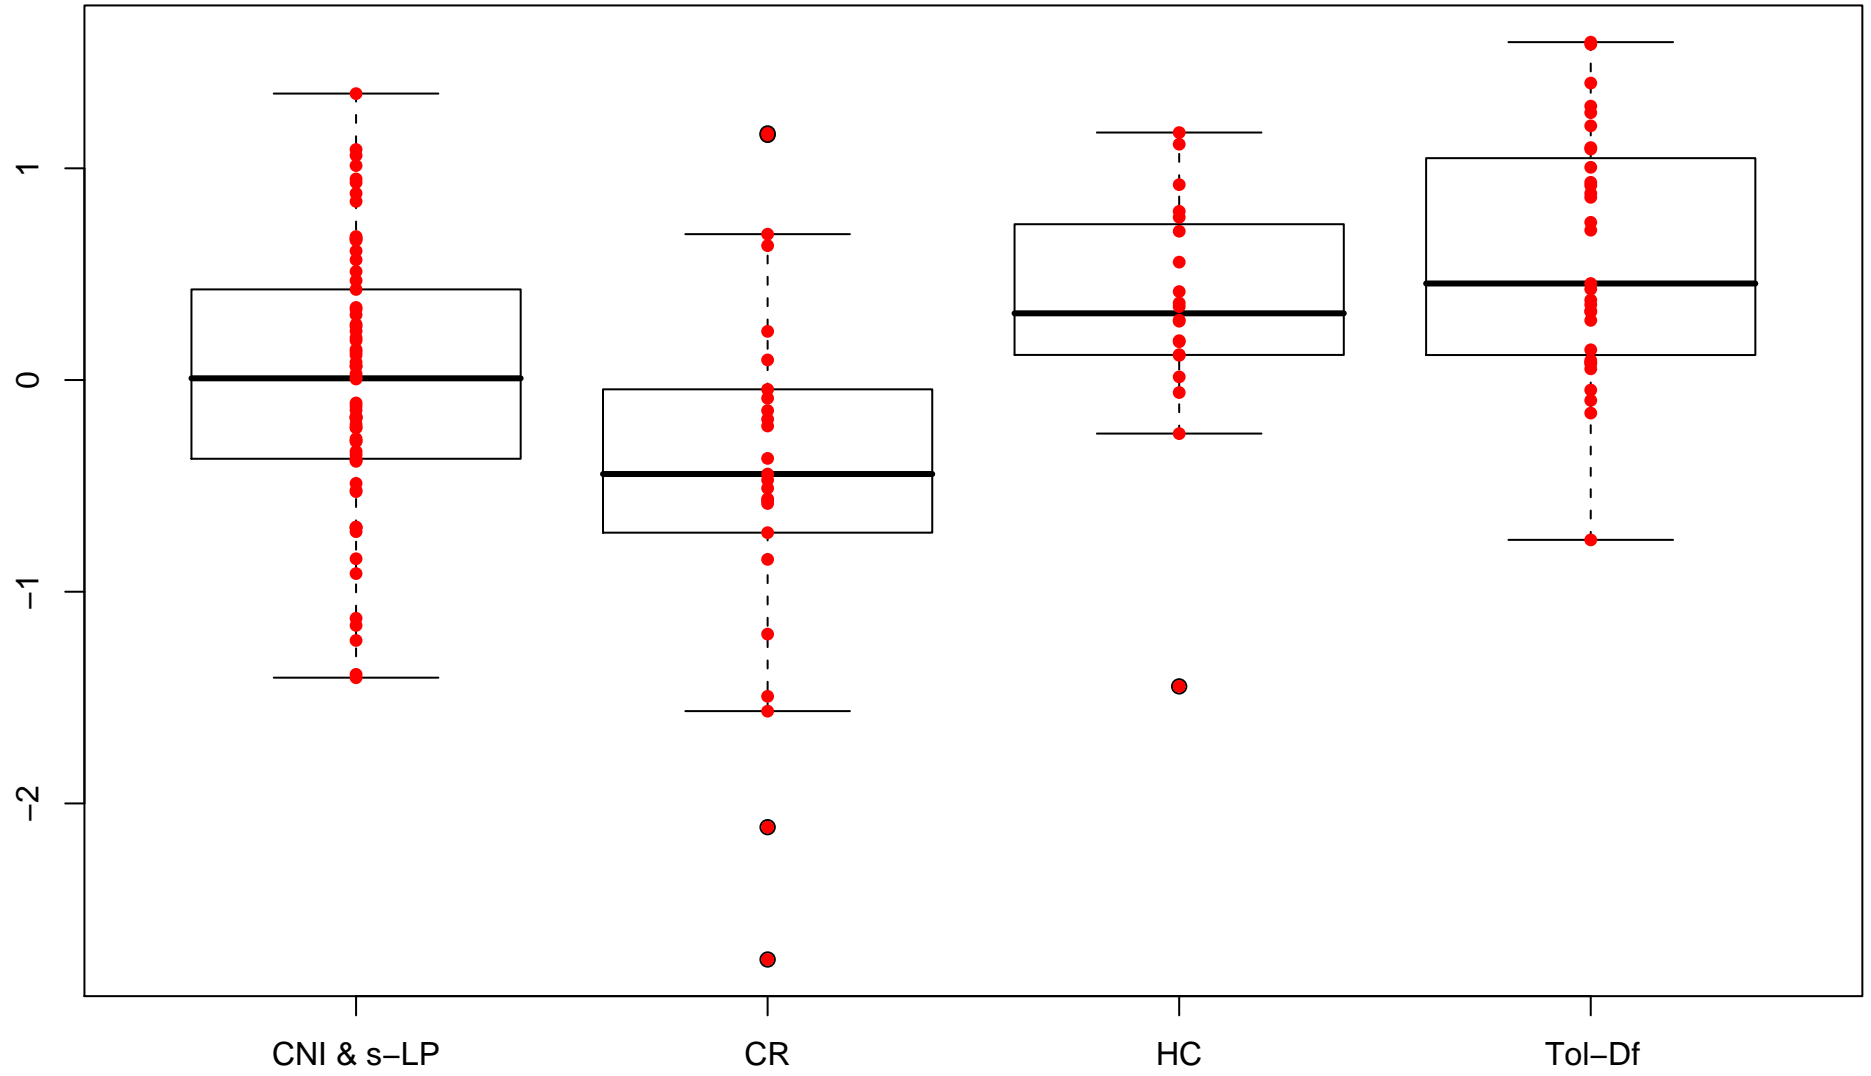

Rank 110 : MBOAT2  
7.77e-07

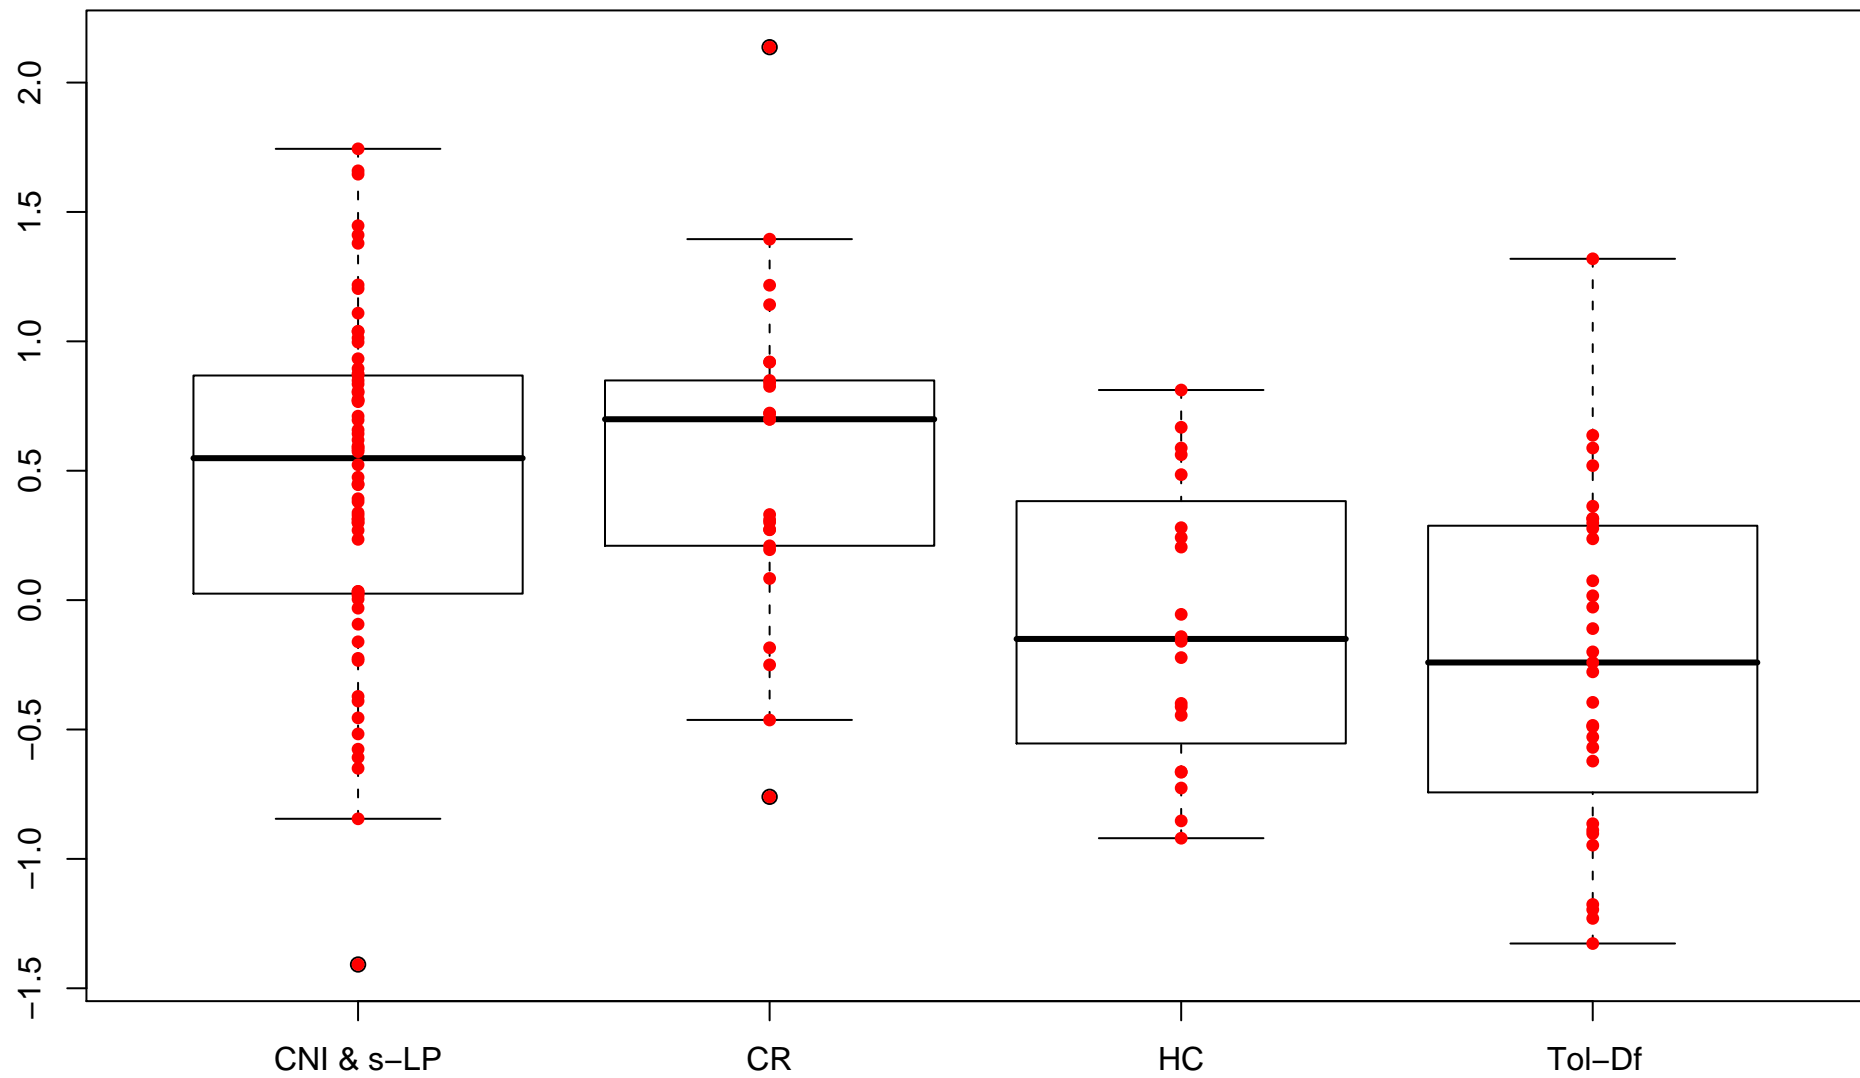

Rank 111 : BLK  
7.84e-07

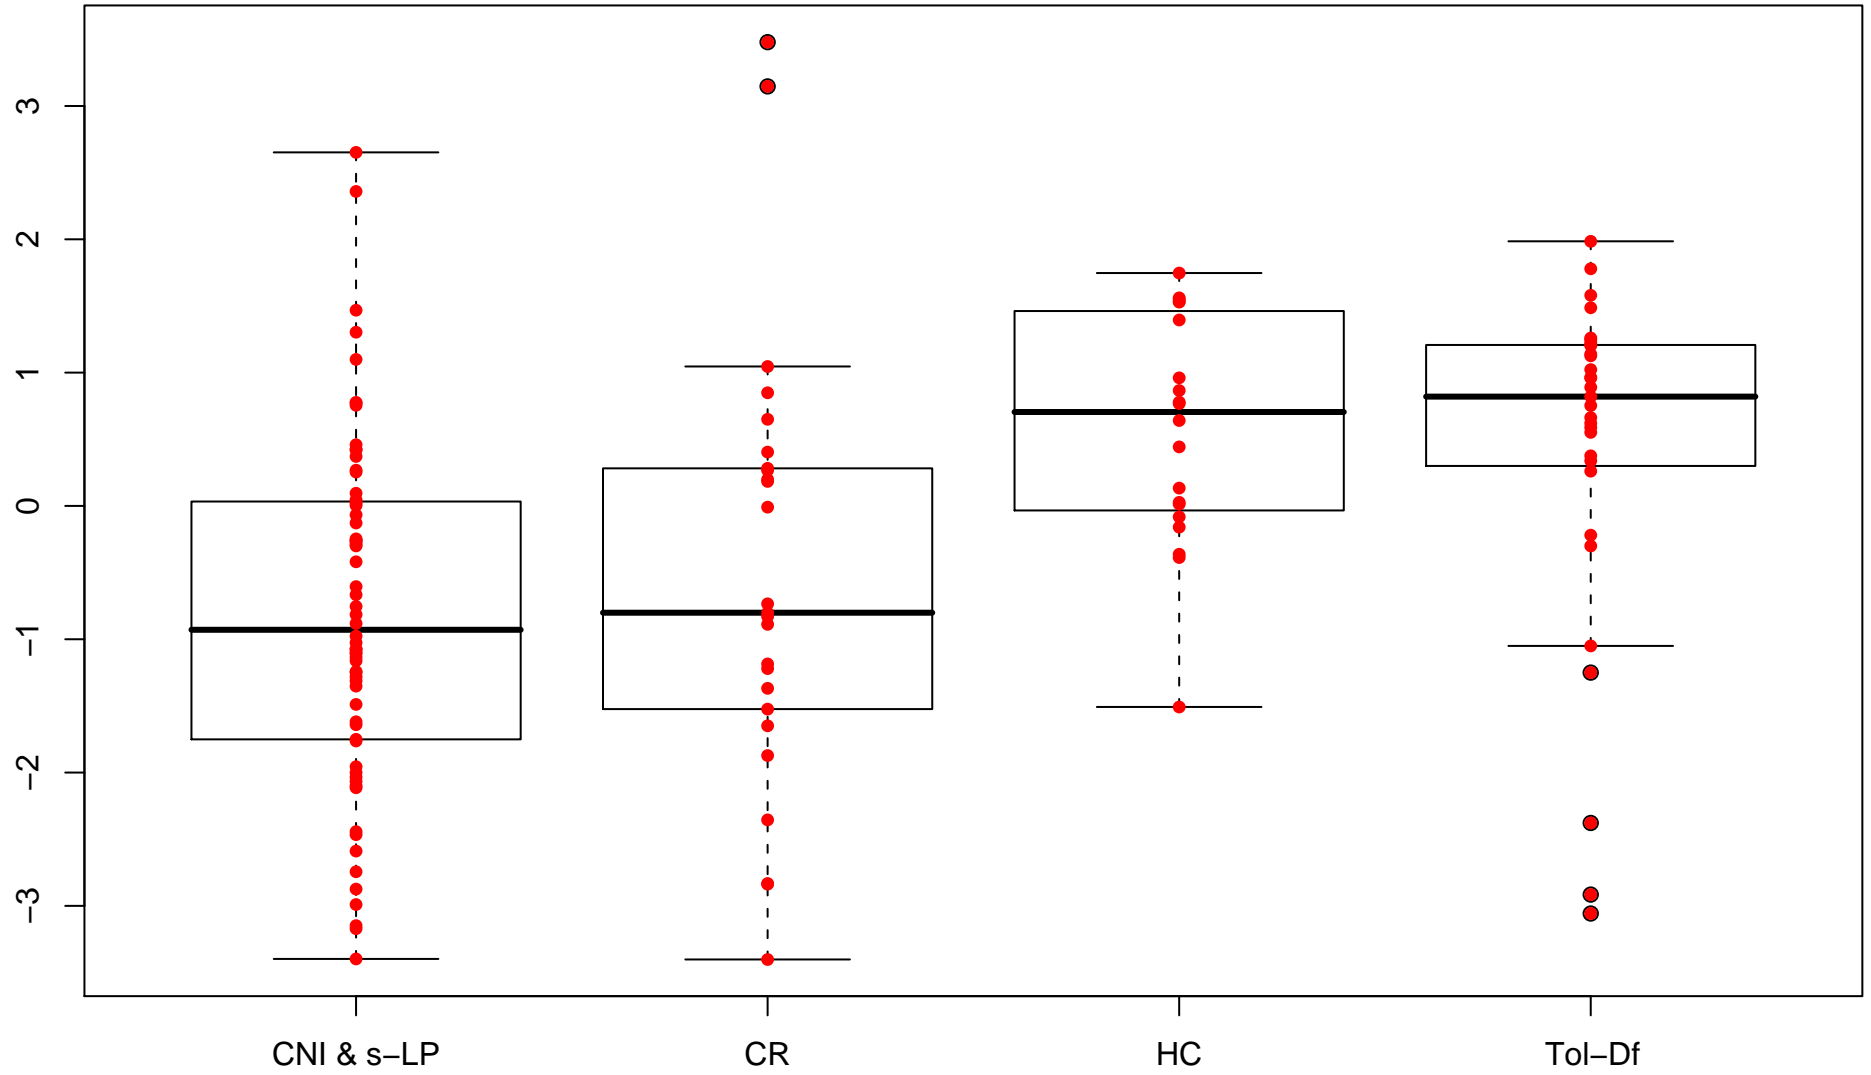



Rank 112 : KCNJ2  
8.153e-07

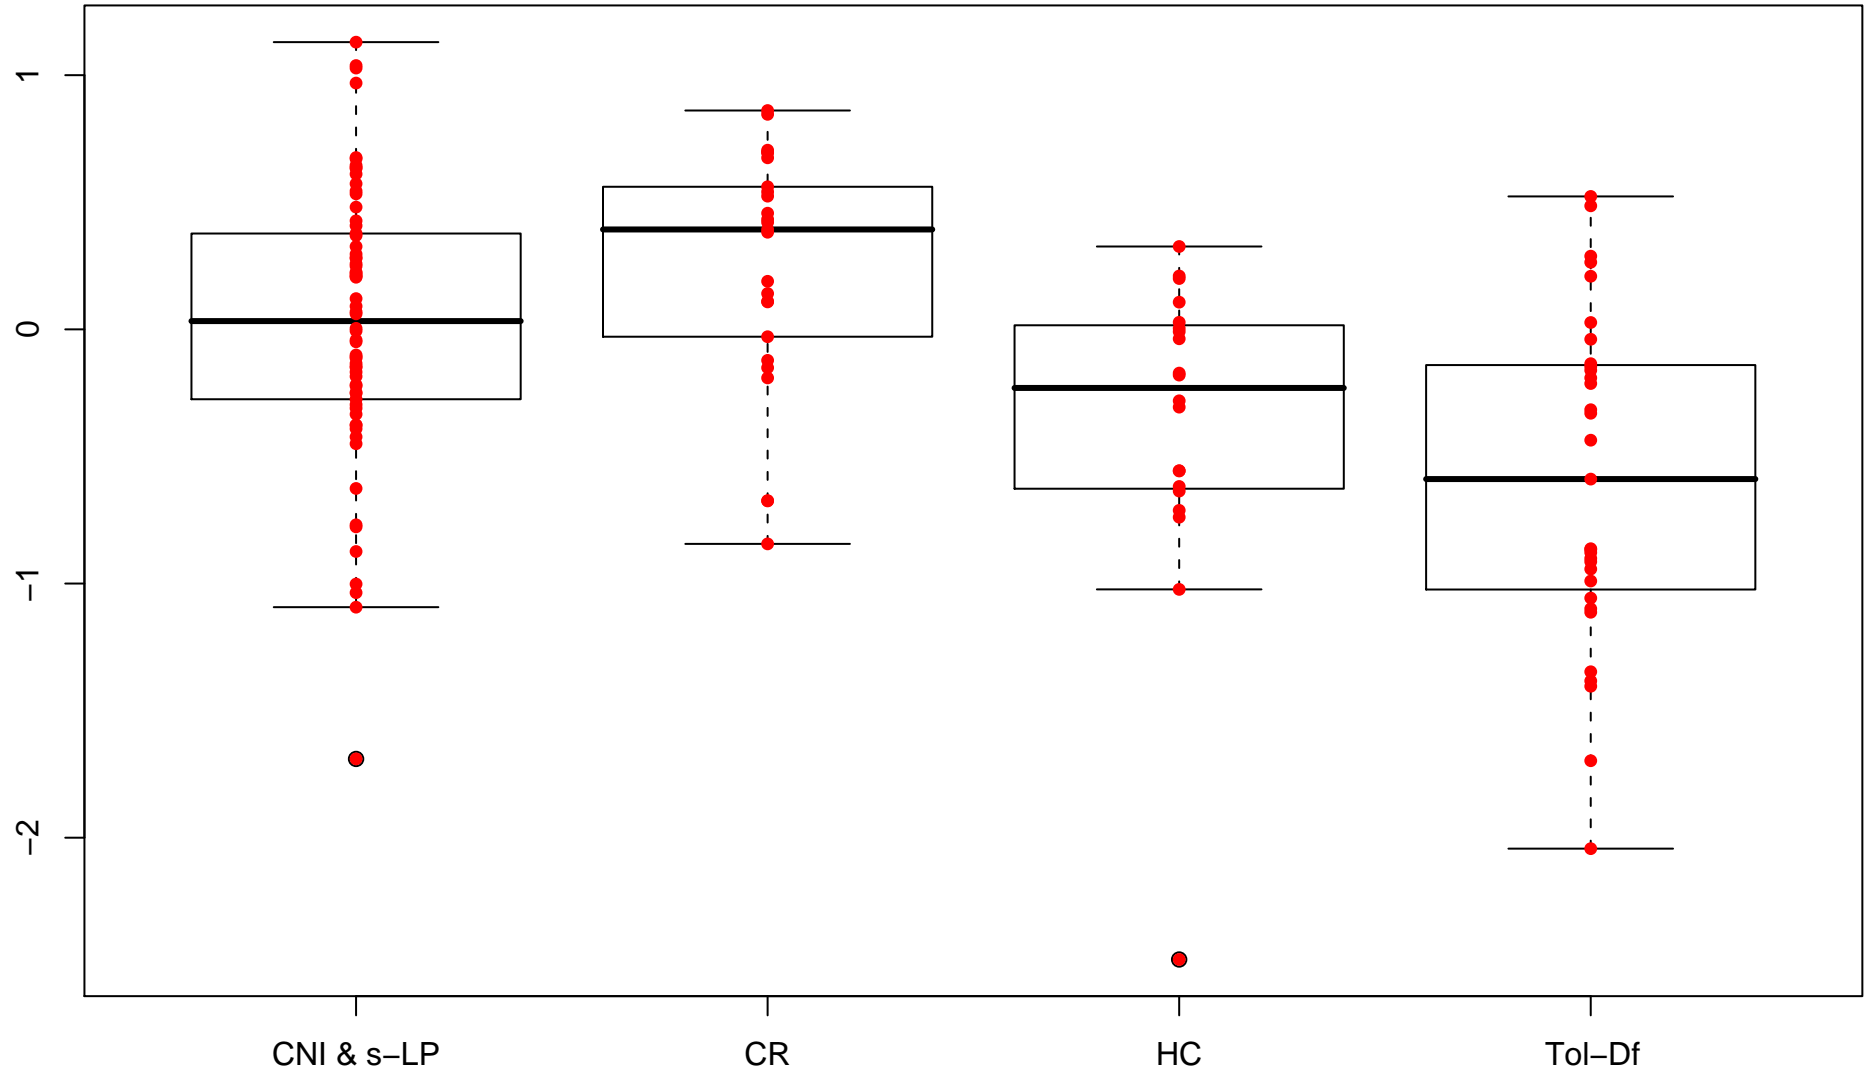

Rank 113 : FOXO3  
8.382e-07

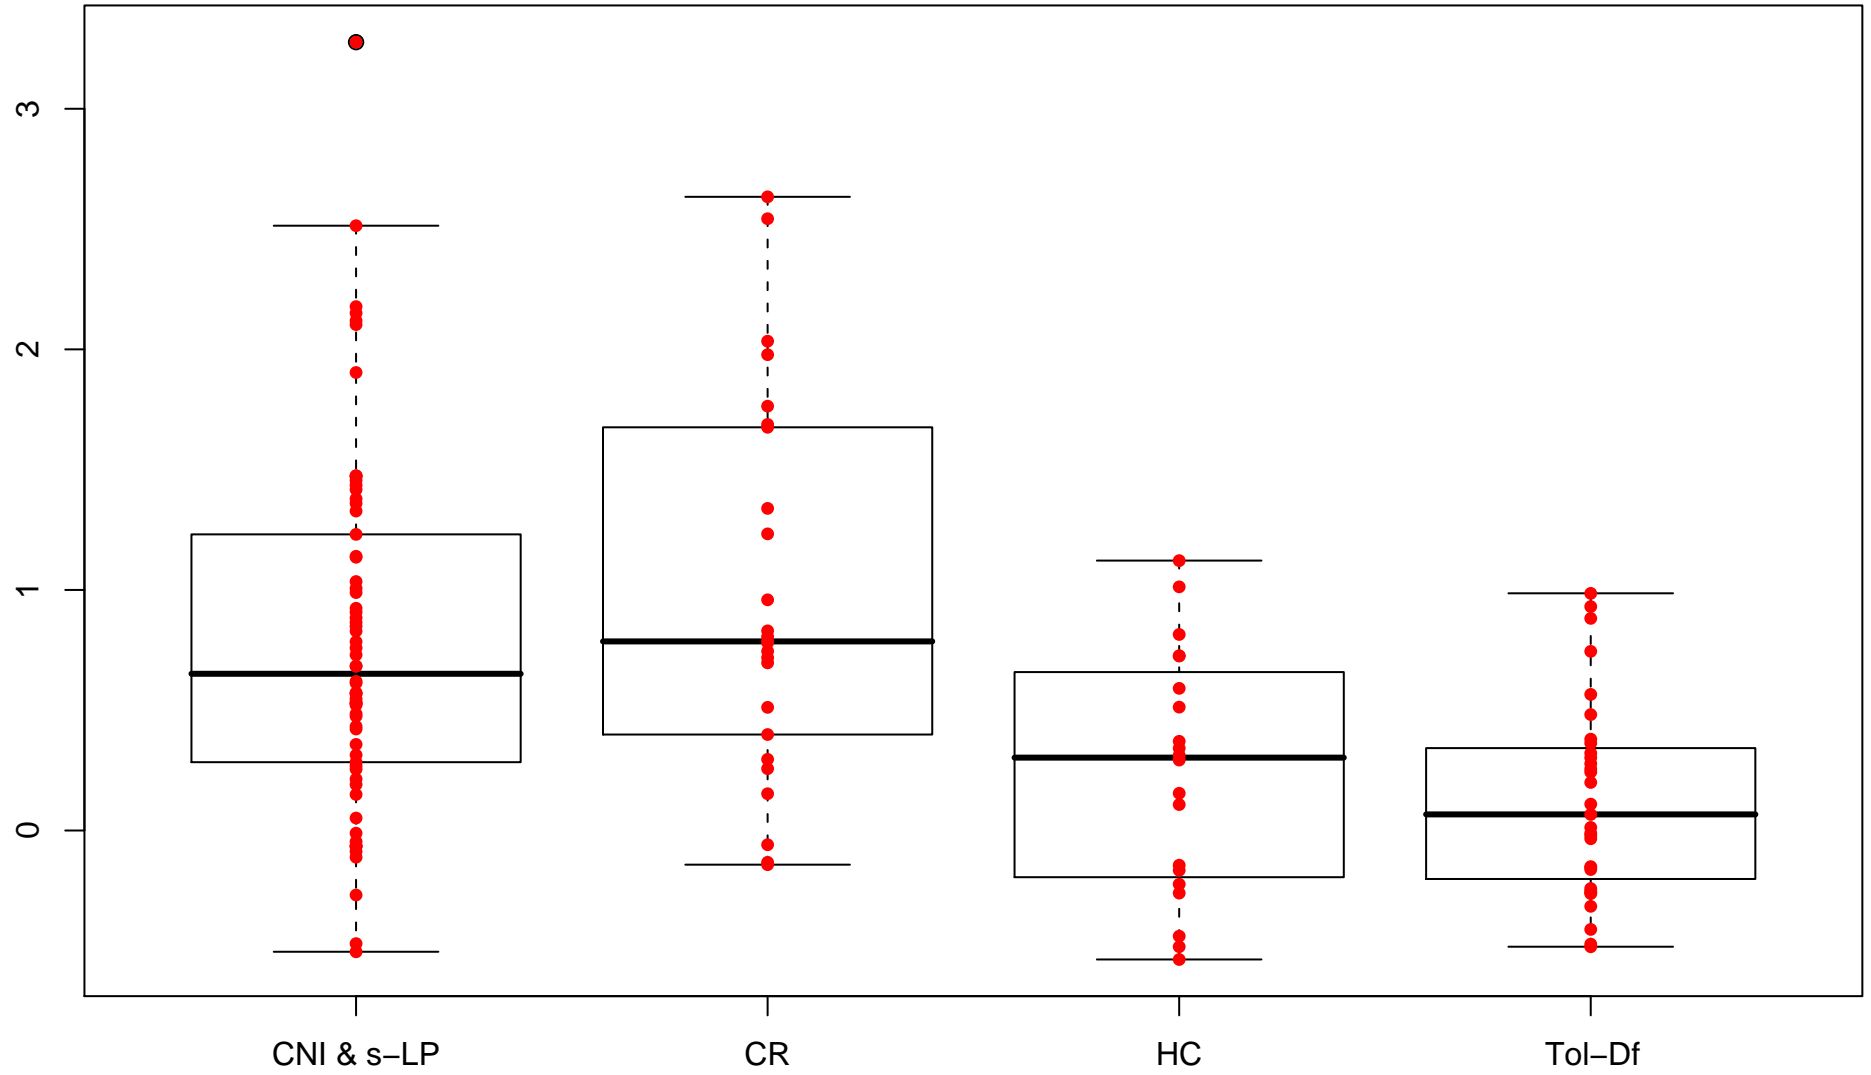

Rank 114 : HSF2  
8.47e-07

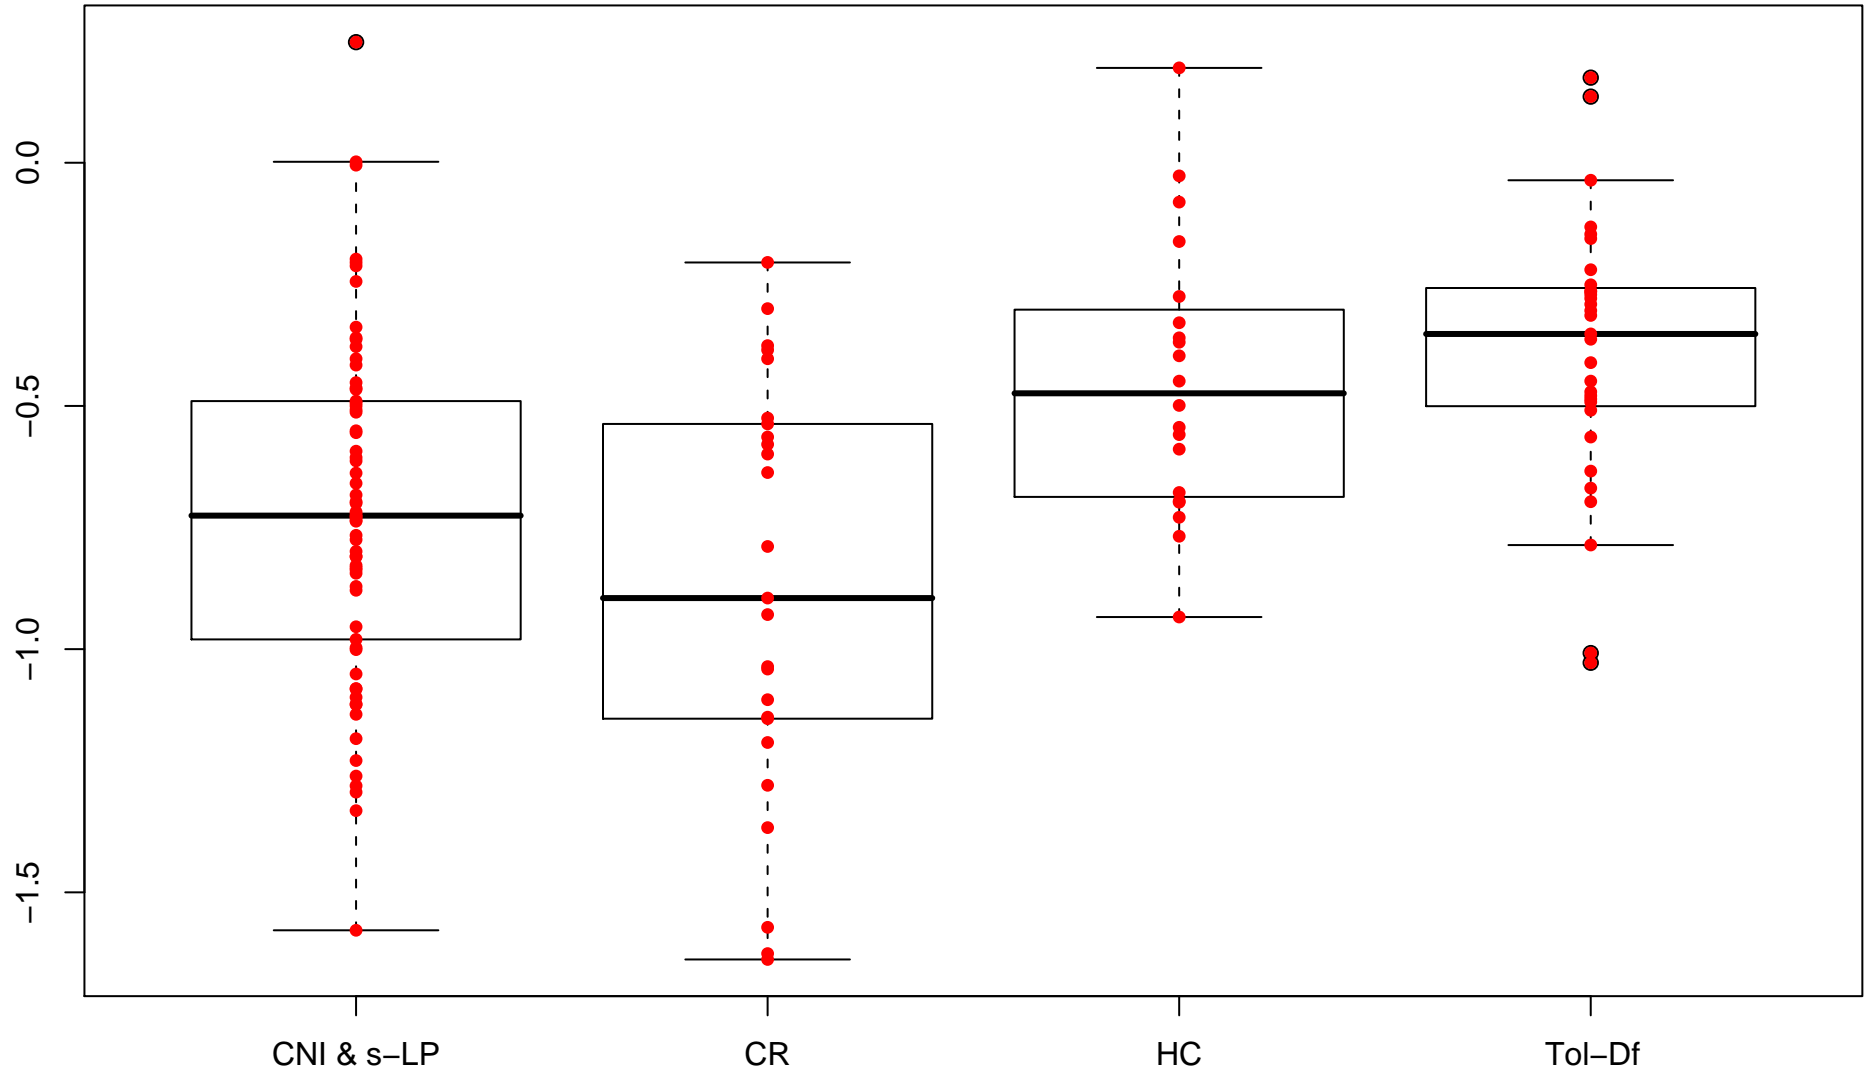

Rank 115 : DTX1  
8.99e-07

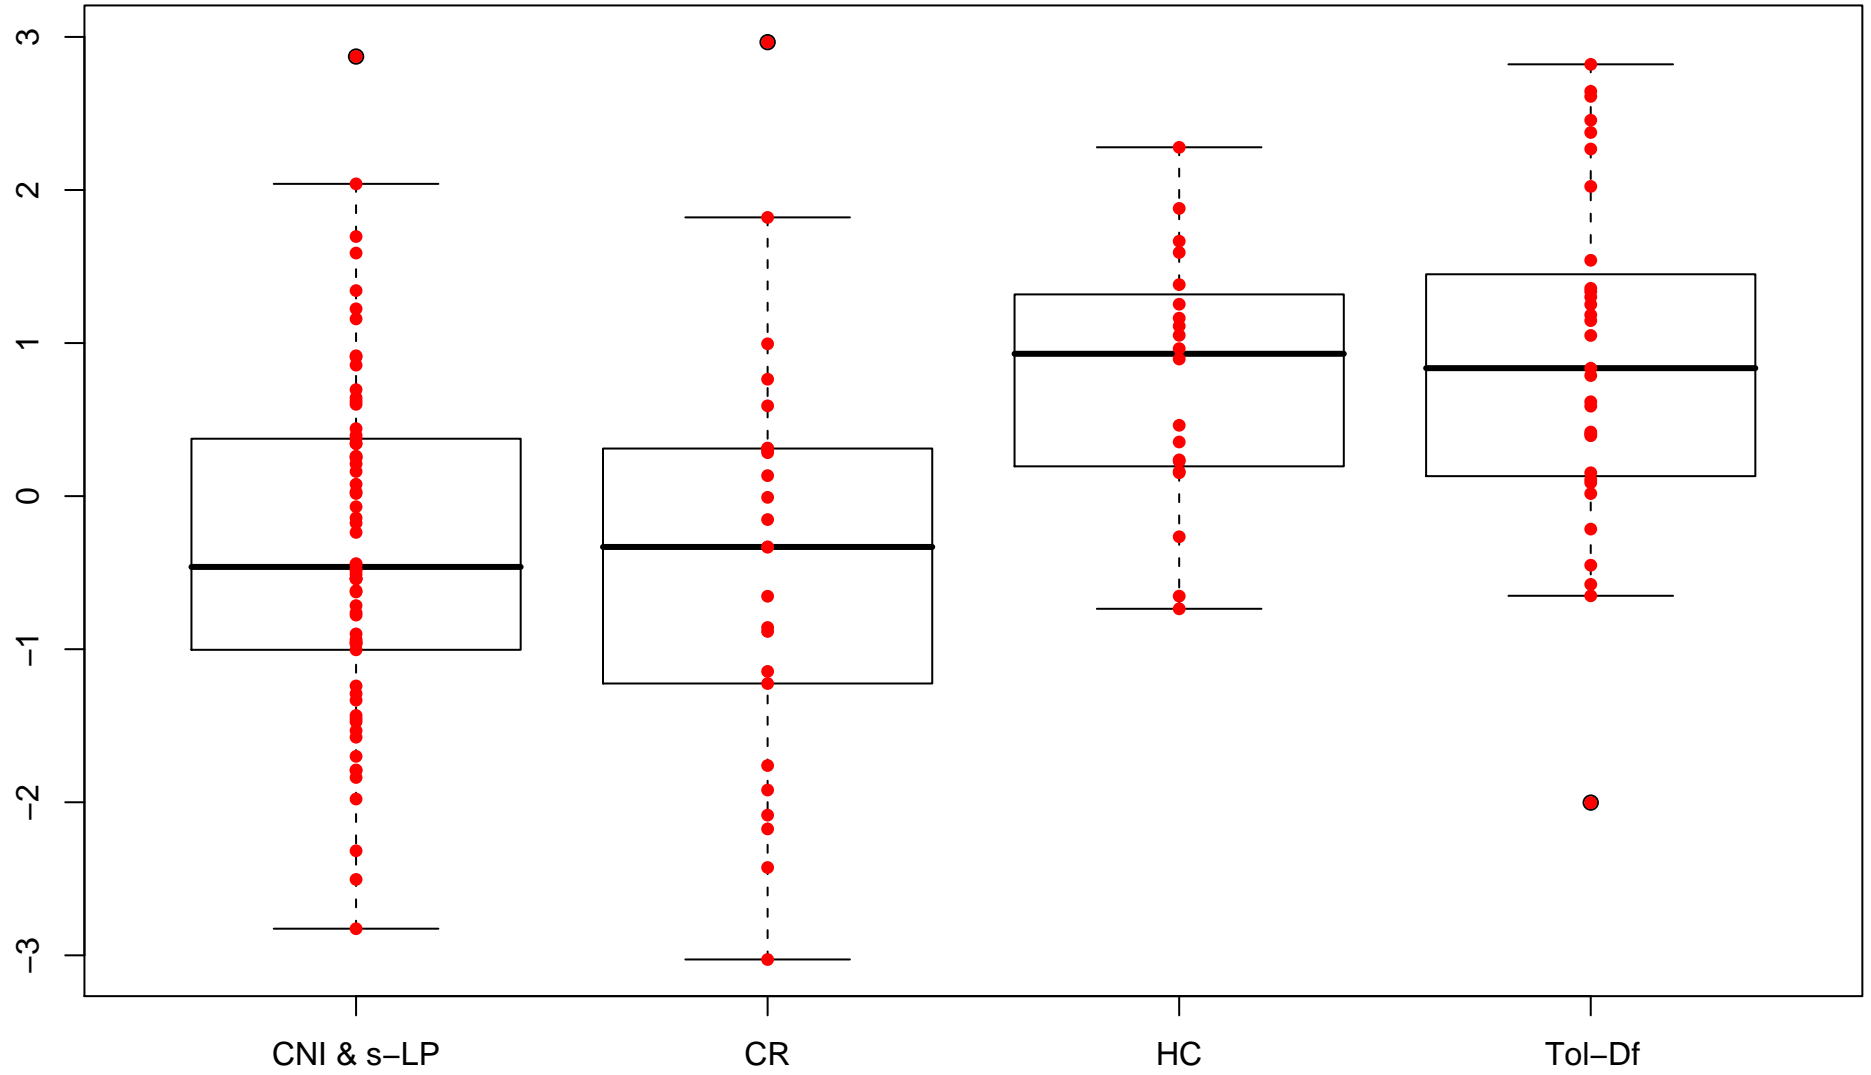

Rank 116 : RPL30  
9.07e-07

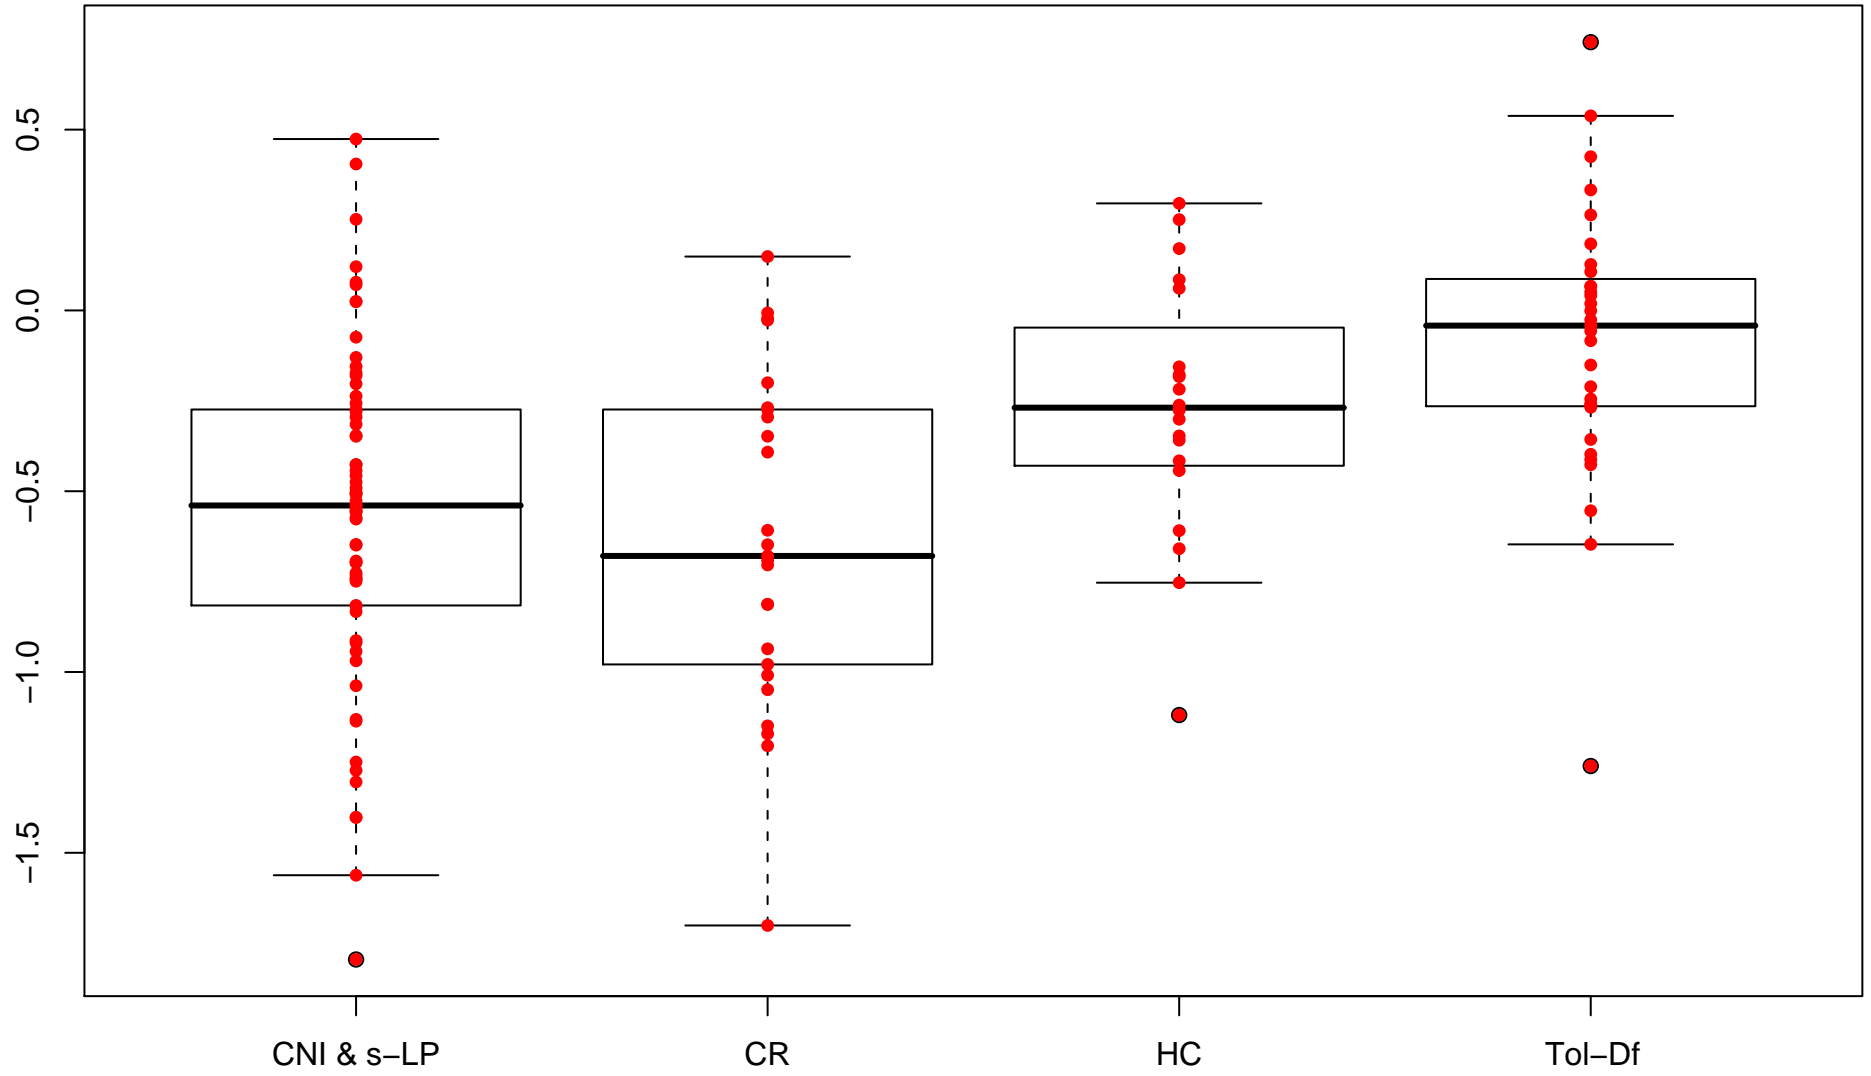

Rank 117 : IL12RB2  
9.143e-07

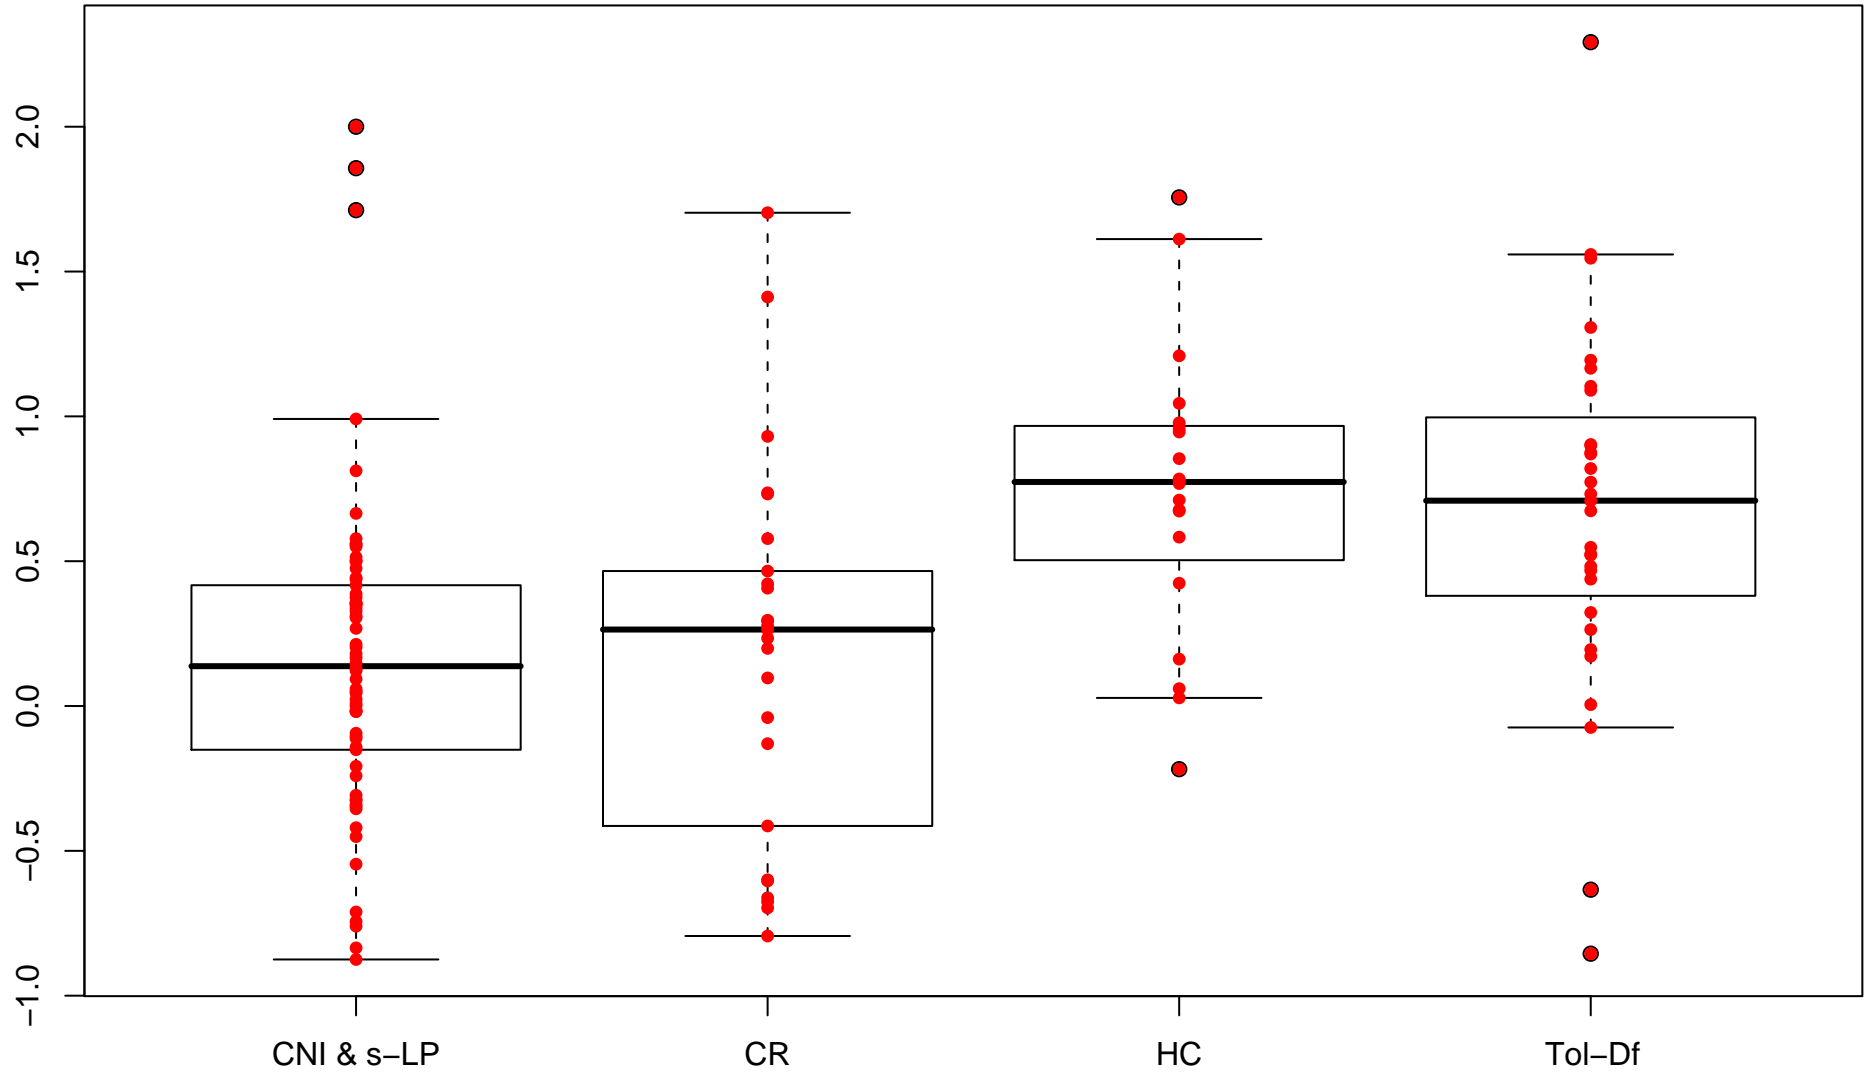

Rank 118 : FLJ36644  
9.648e-07

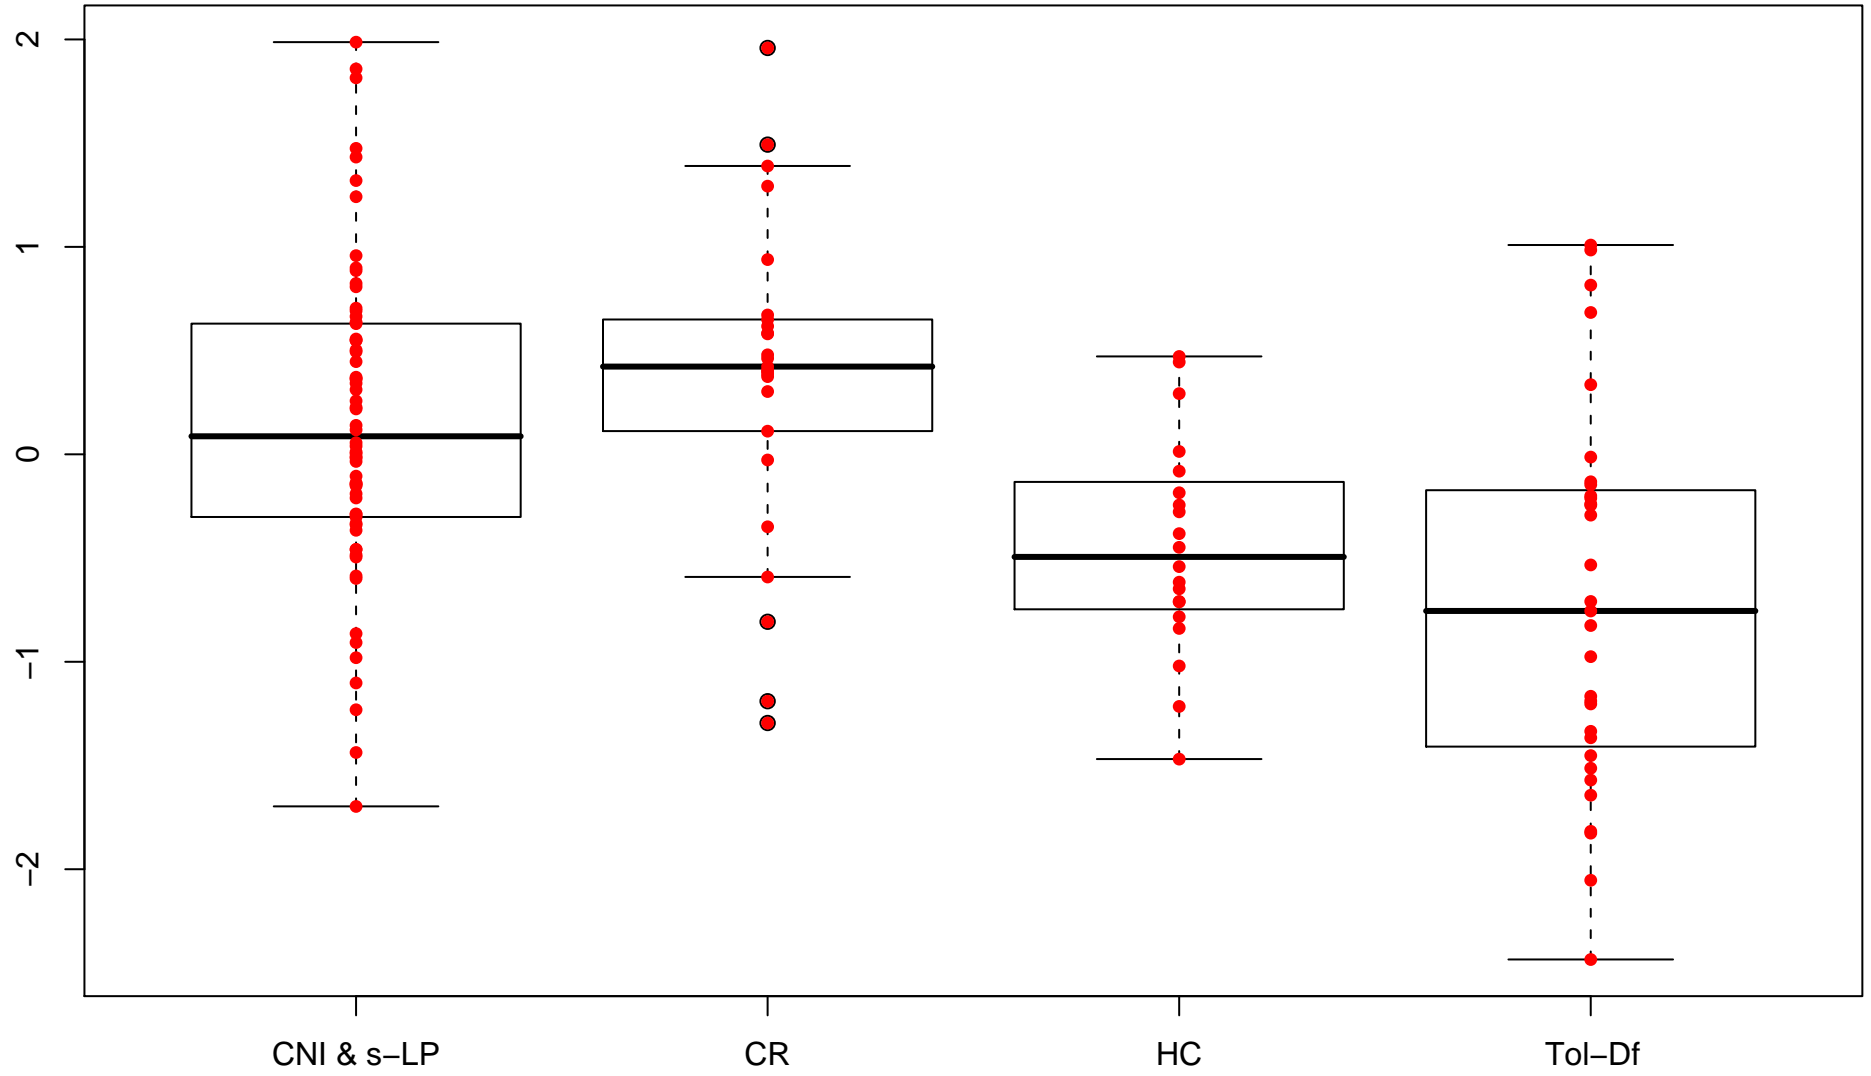

Rank 119 : SLC25A37  
1.0423e-06

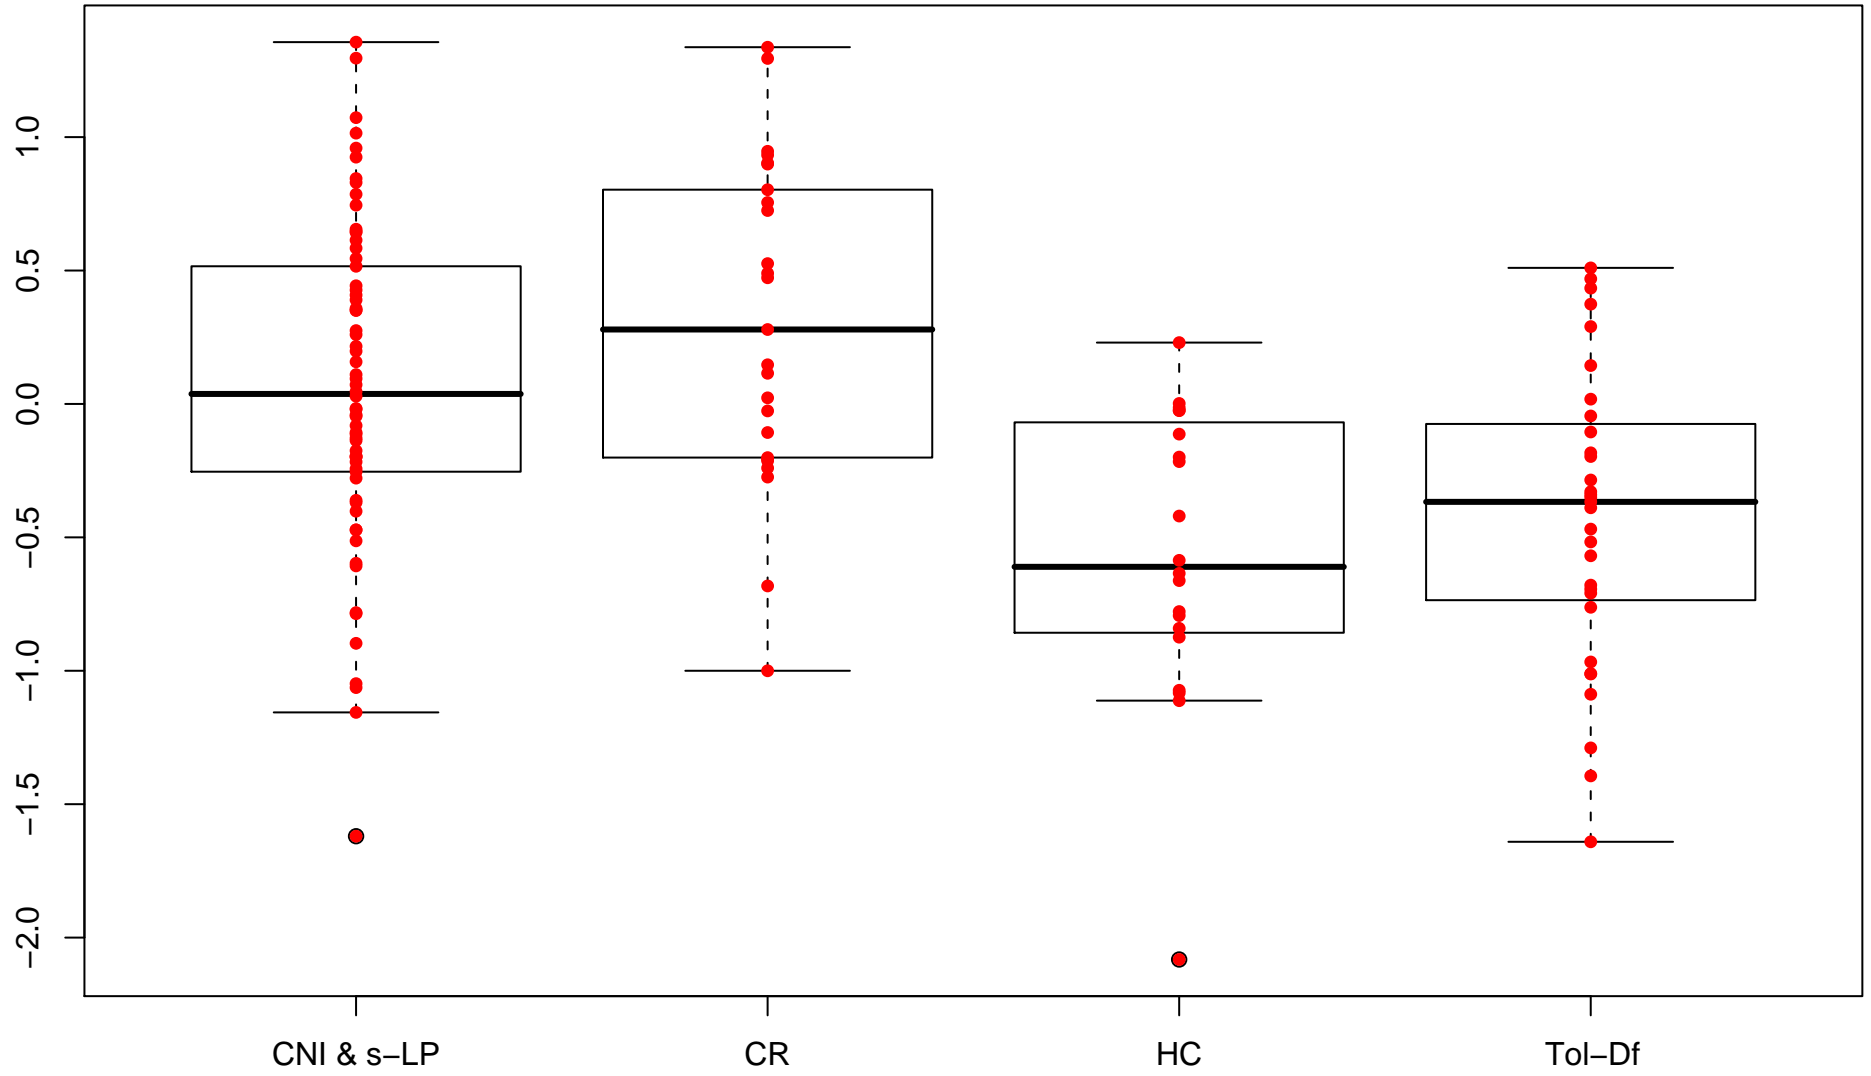



Rank 120 : CD19  
1.097e-06

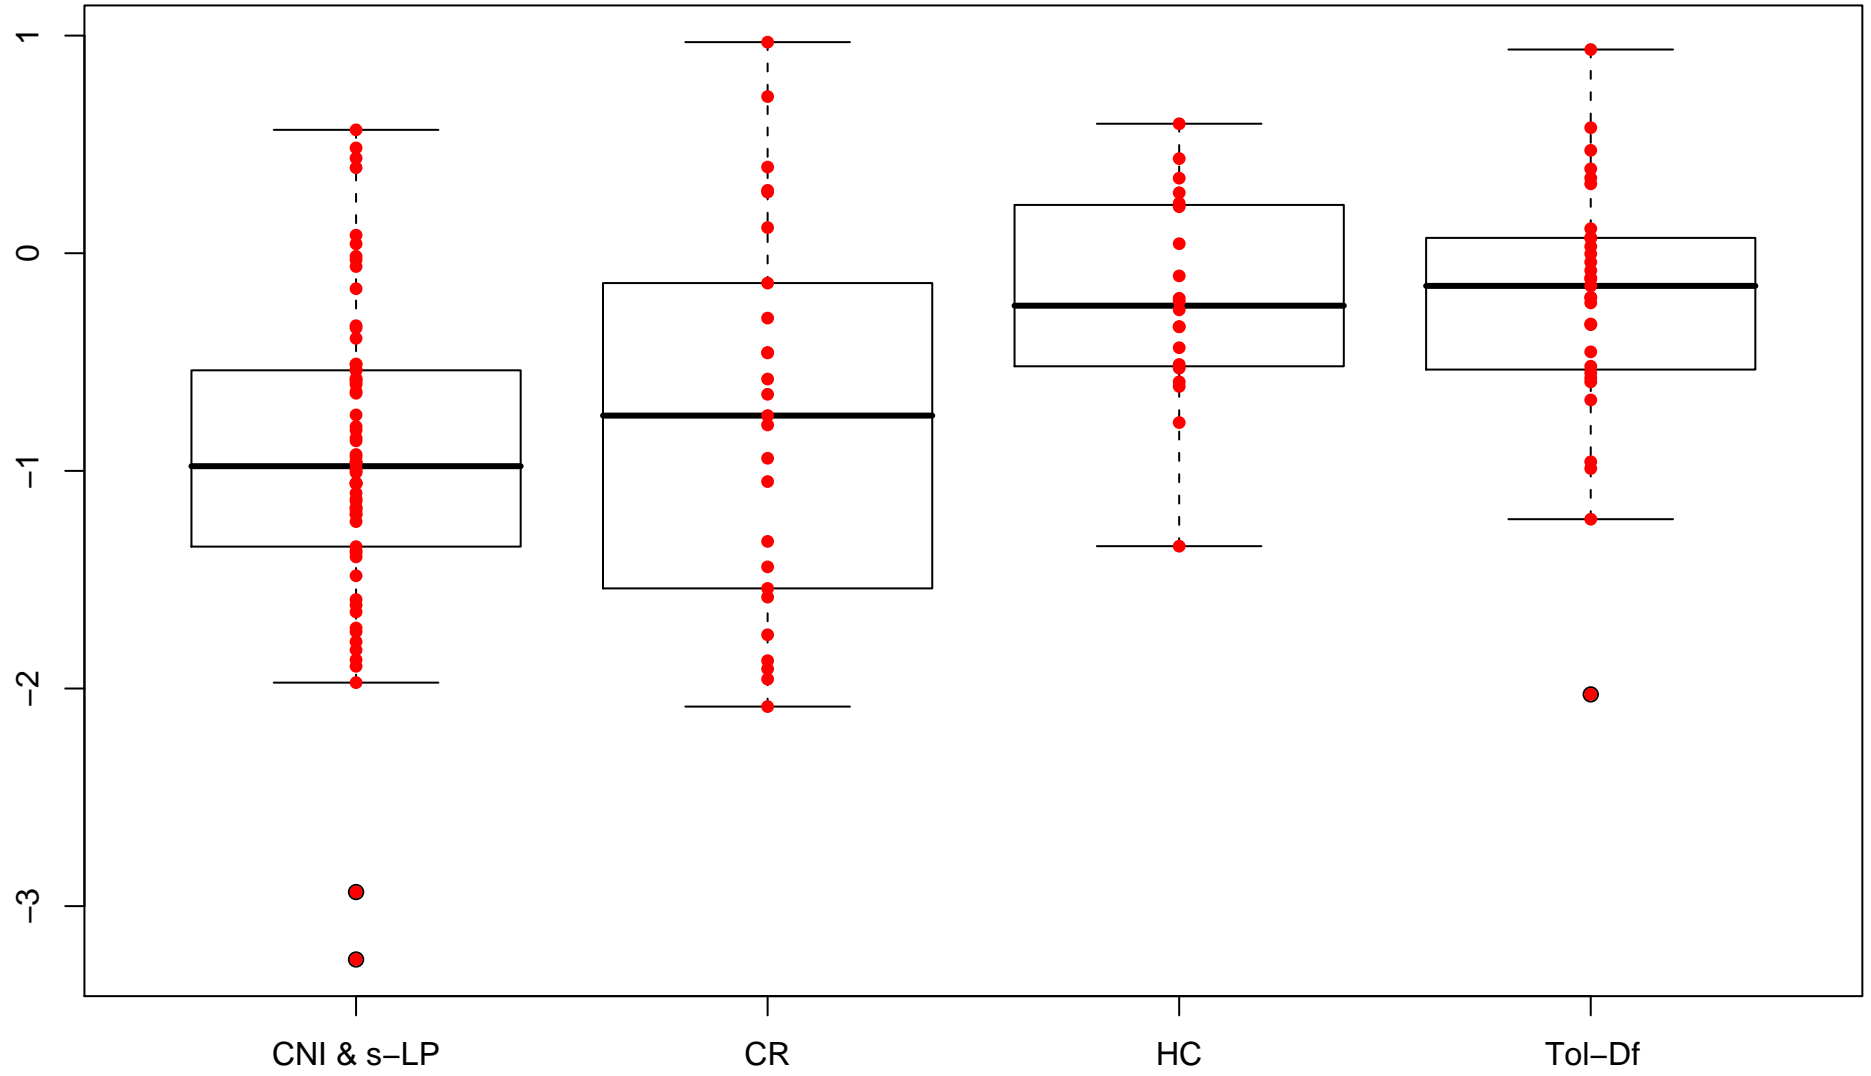

Rank 121 : CD22  
1.0981e-06

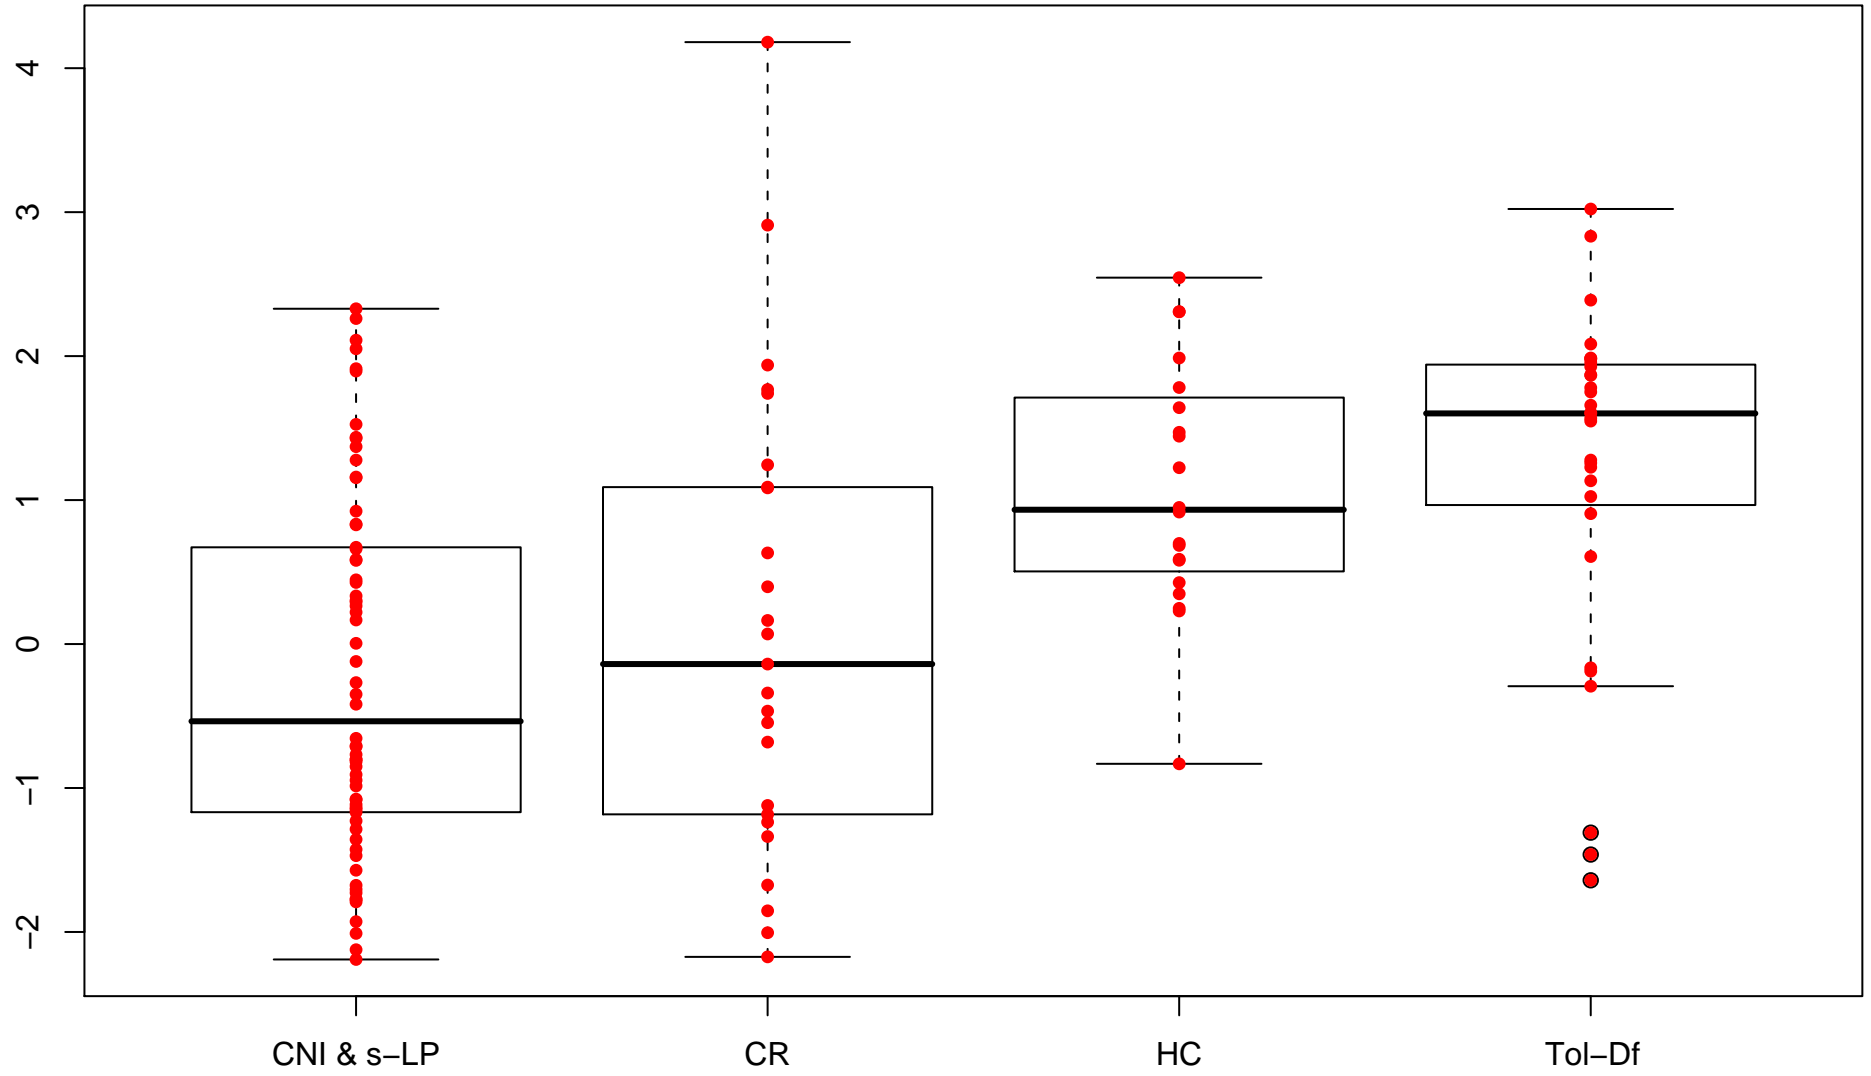

Rank 122 : EP400  
1.105e-06

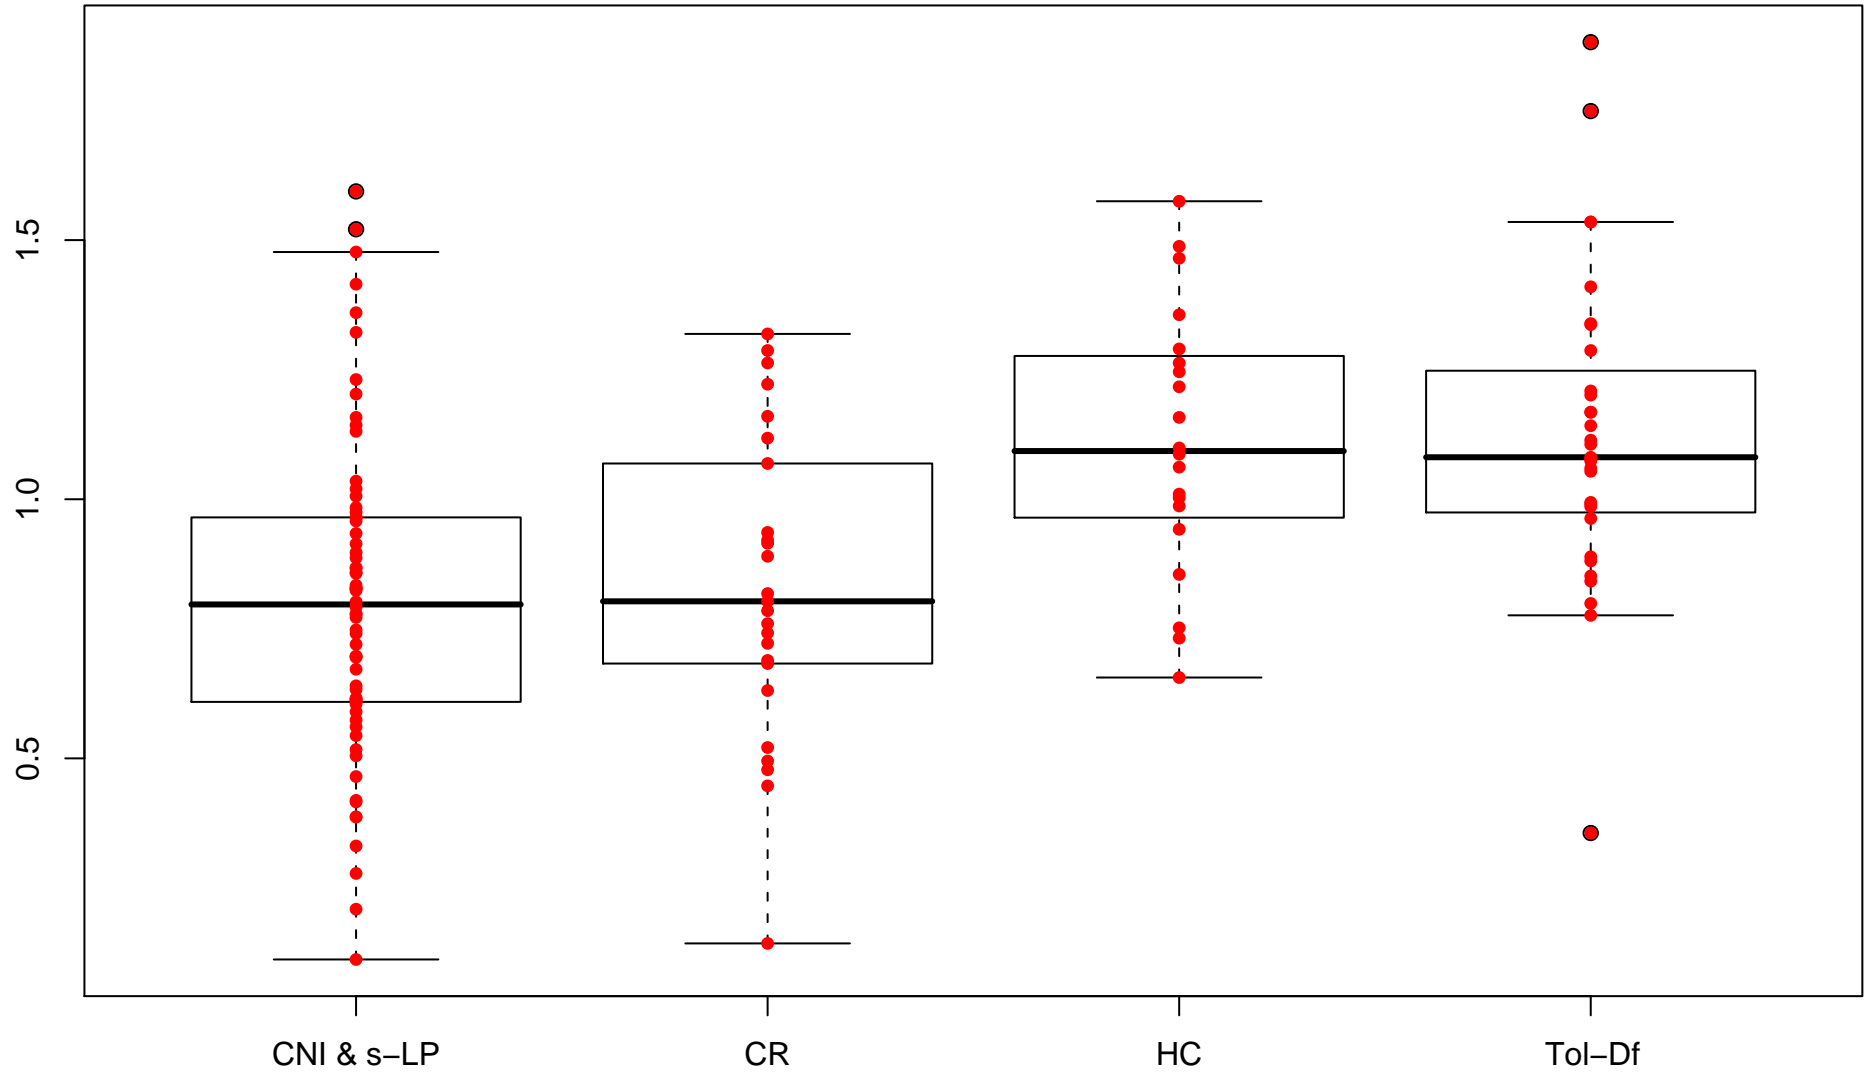

Rank 123 : CD83  
1.1672e-06

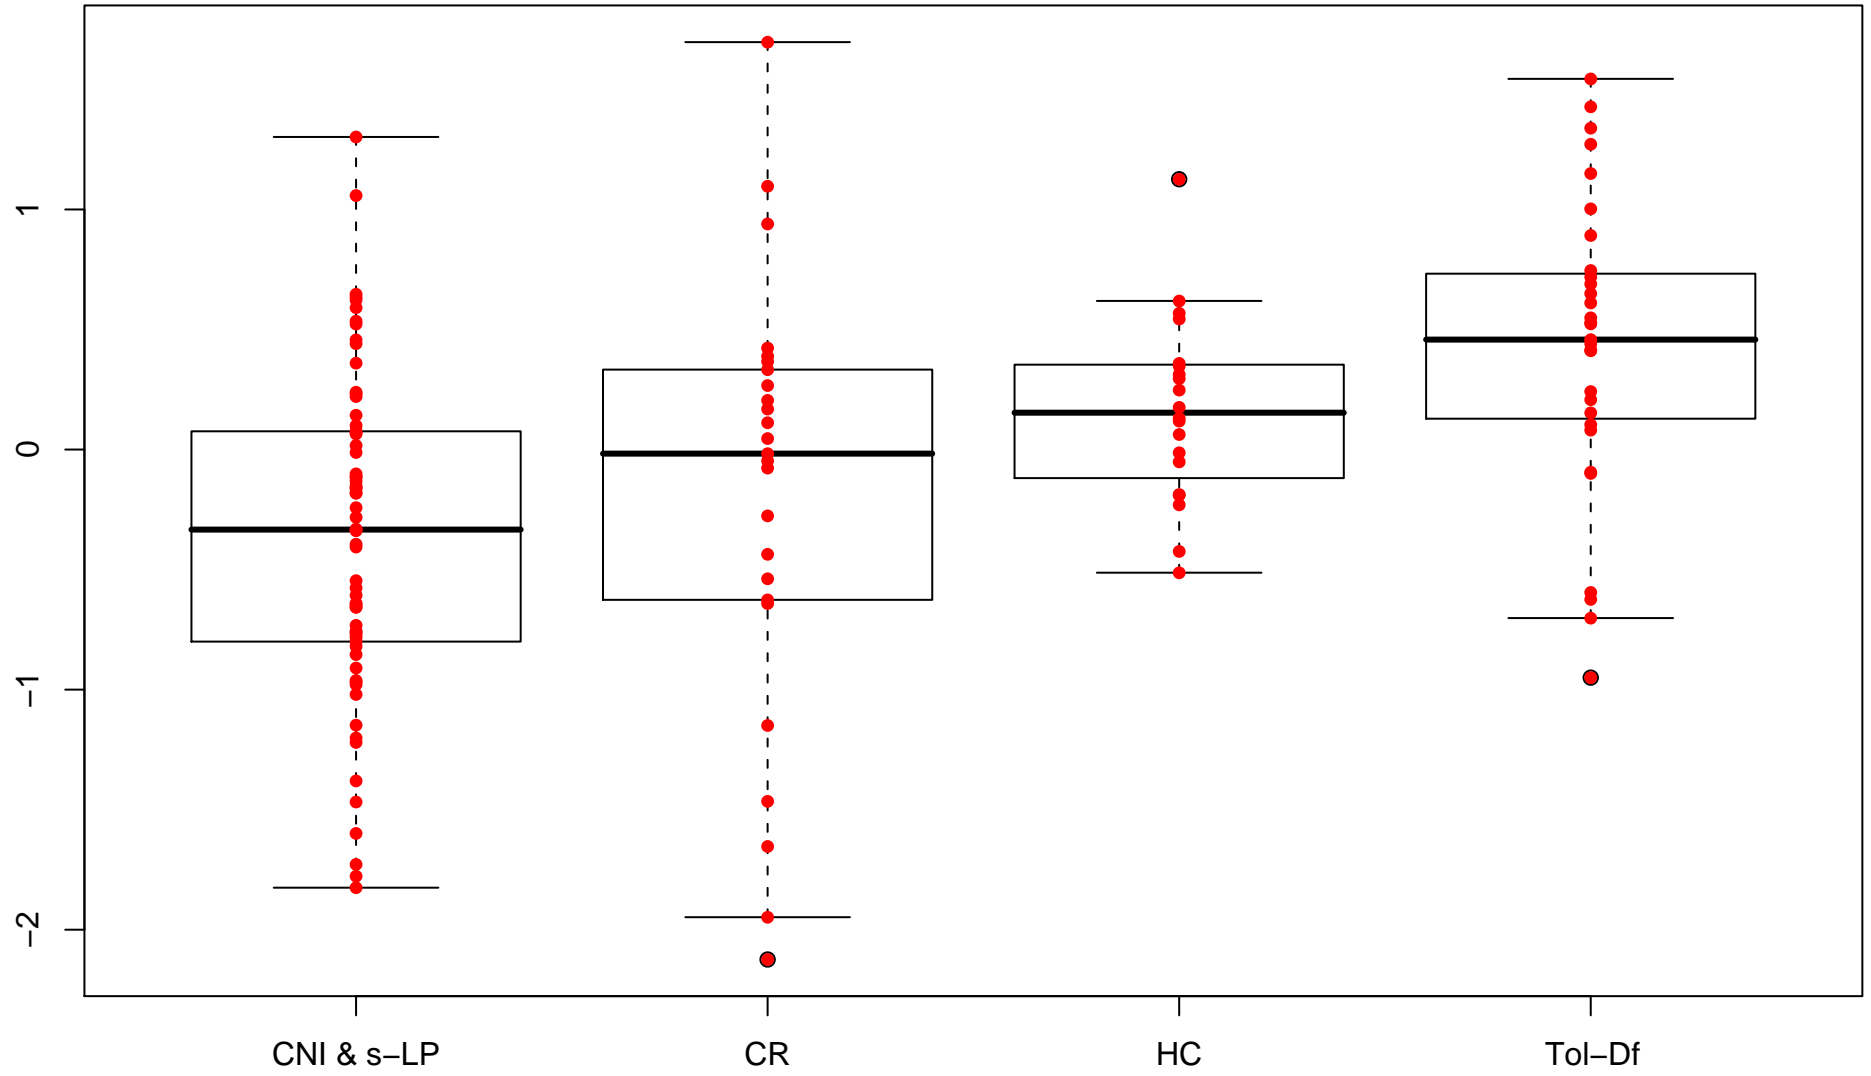

Rank 124 : IRAK3  
1.1956e-06

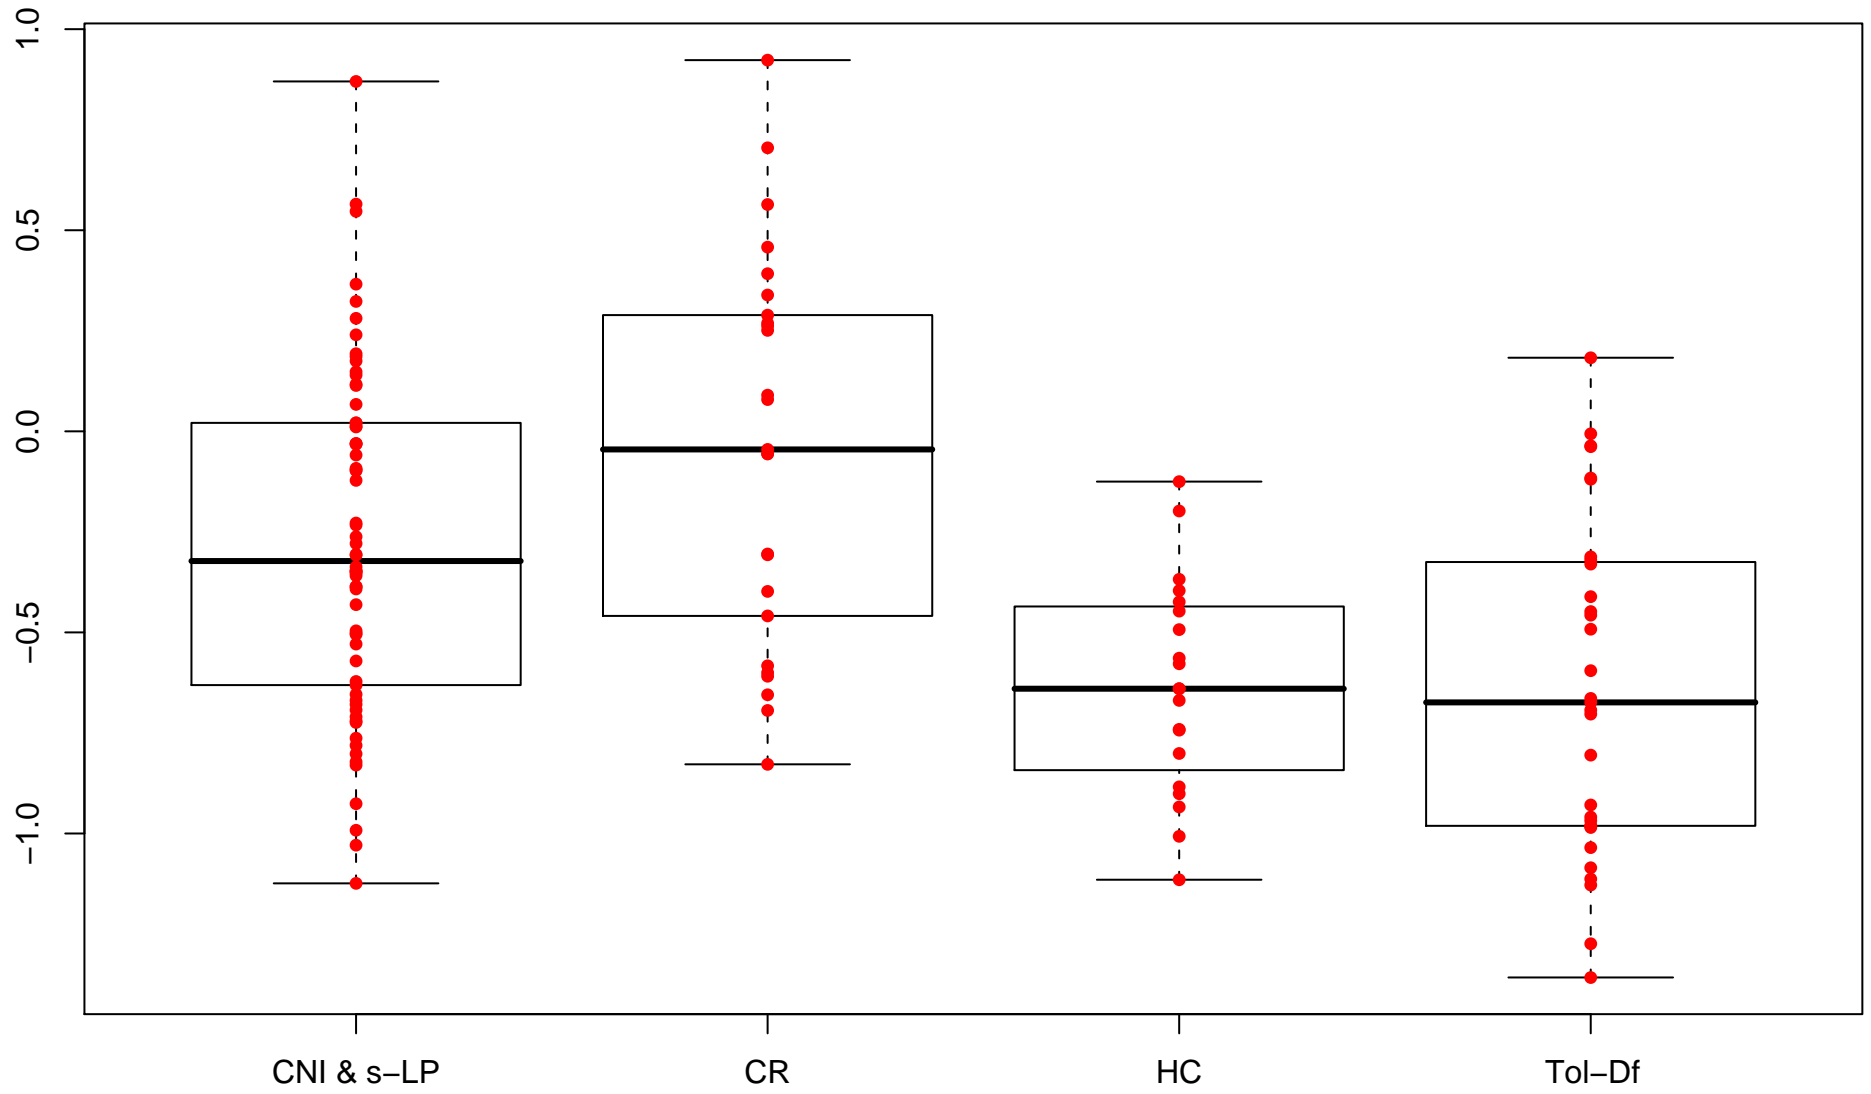

Rank 125 : GPR84  
1.2634e-06

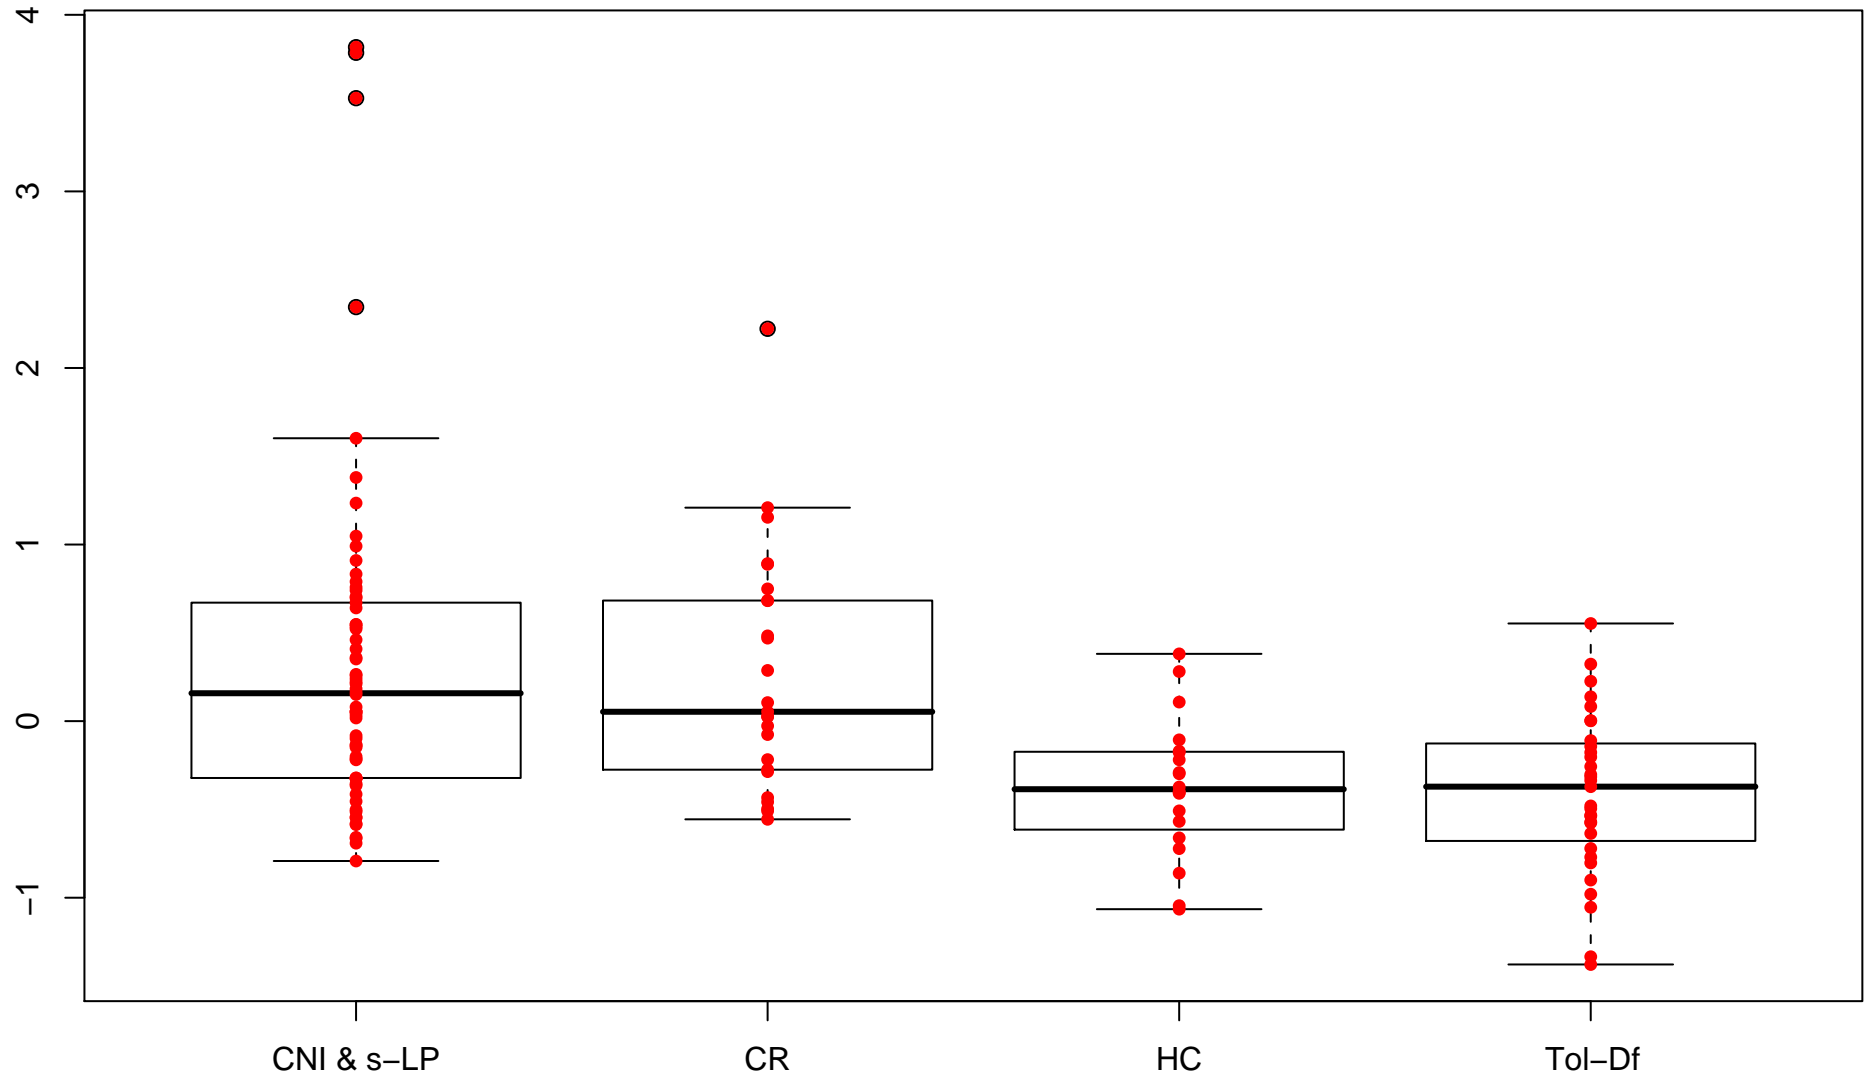

Rank 126 : GATM  
1.2925e-06

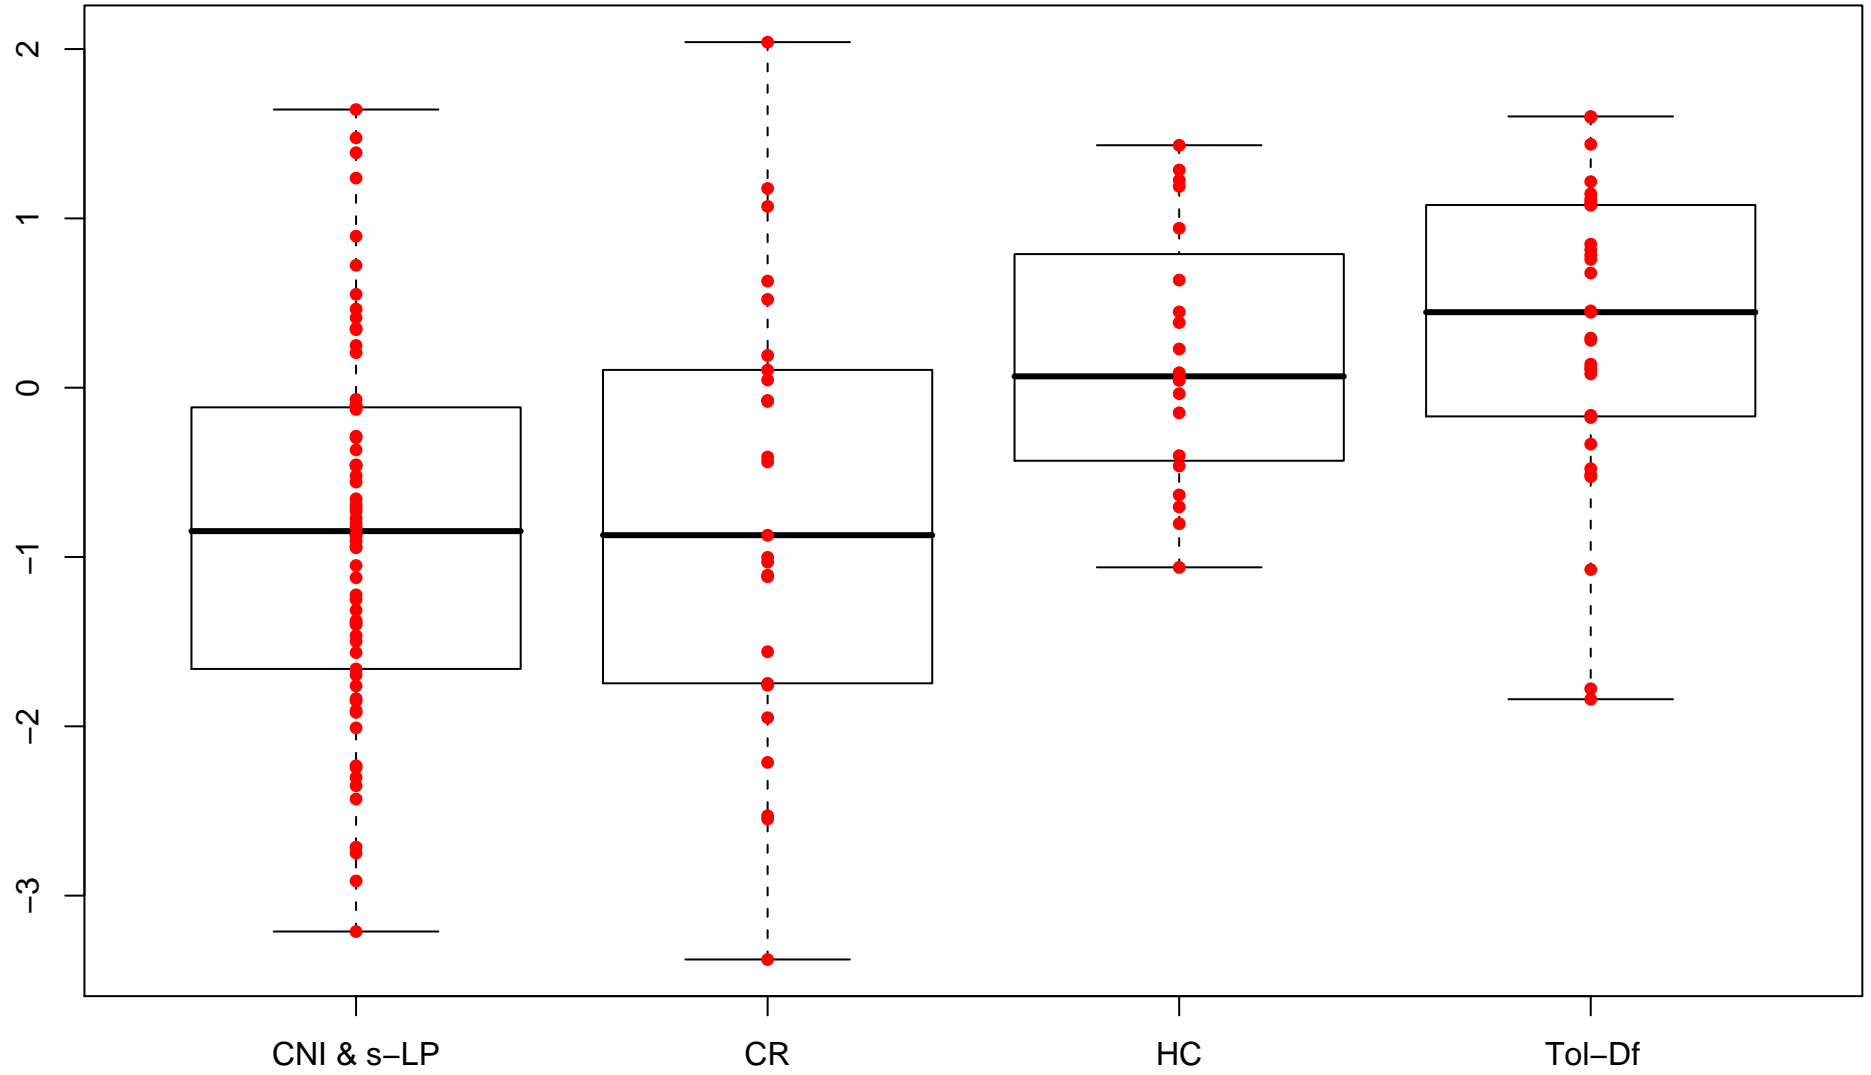

Rank 127 : THC2280867  
1.3427e-06

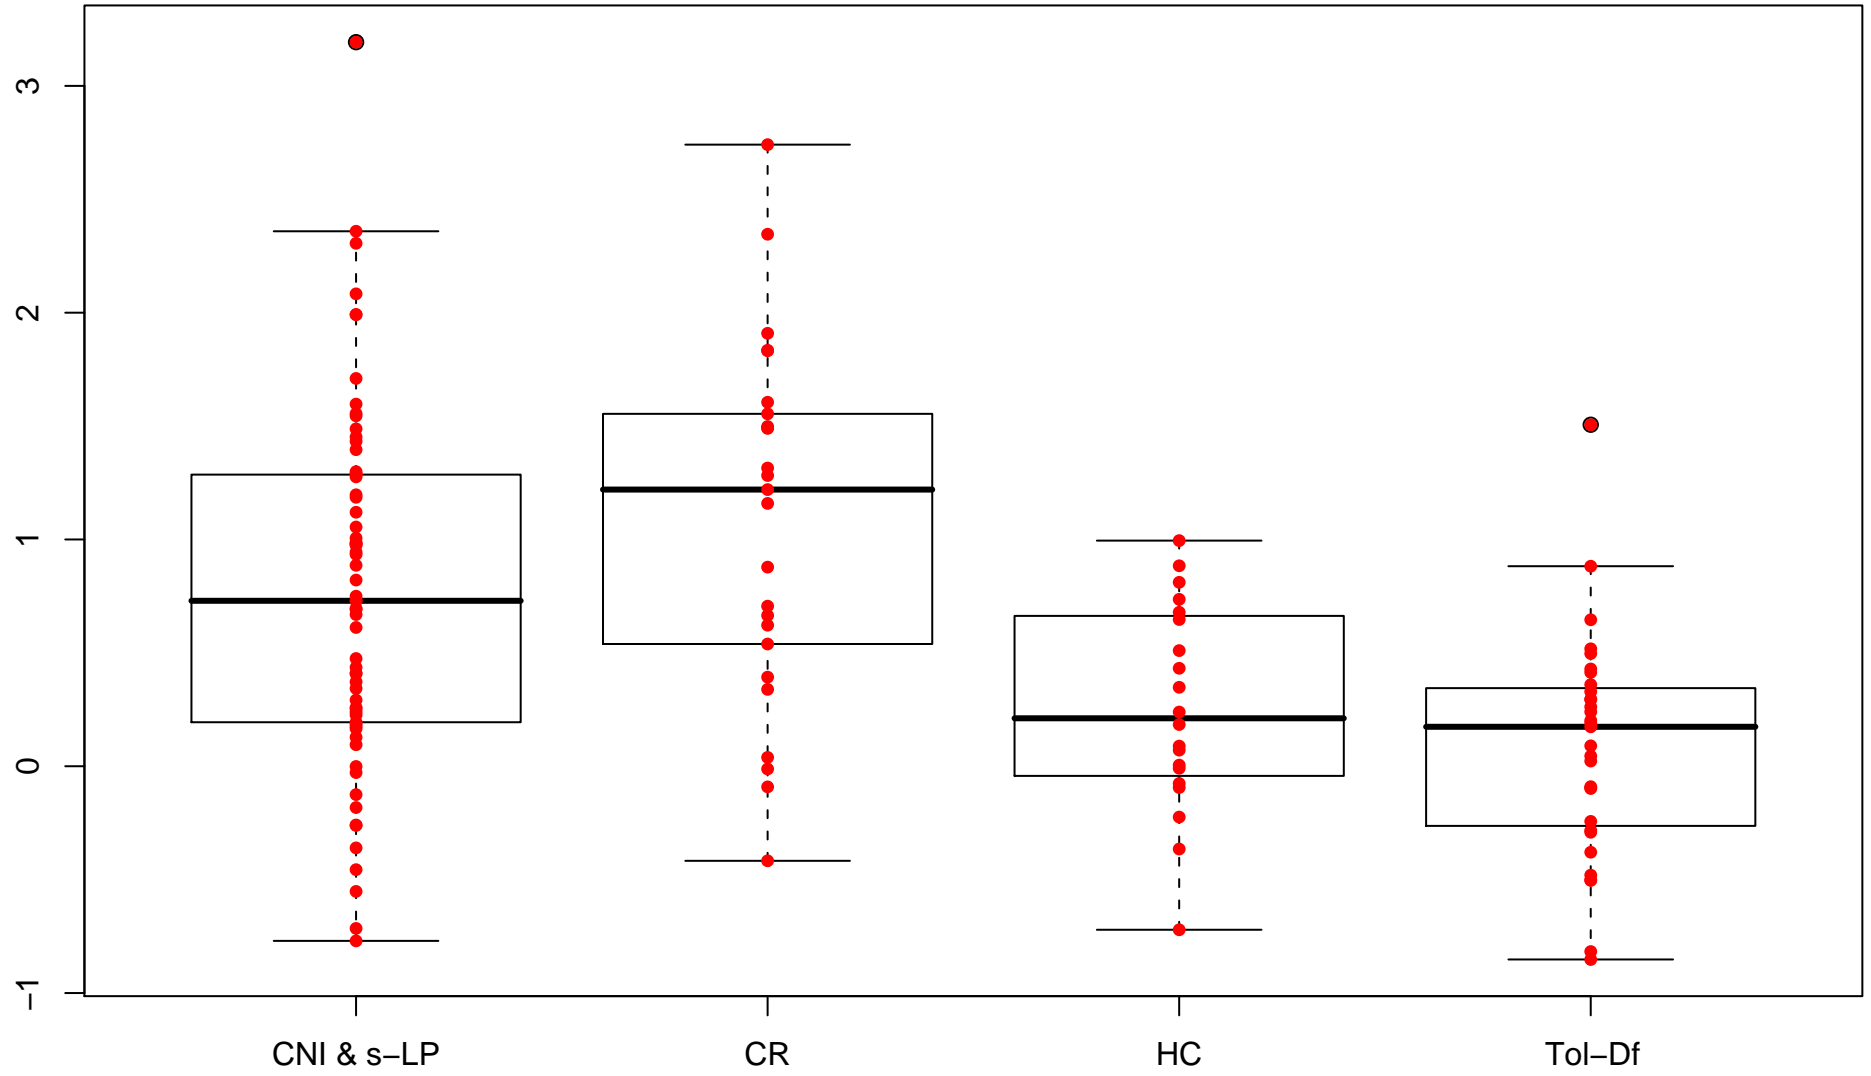



Rank 128 : HLA-DOB  
1.4006e-06

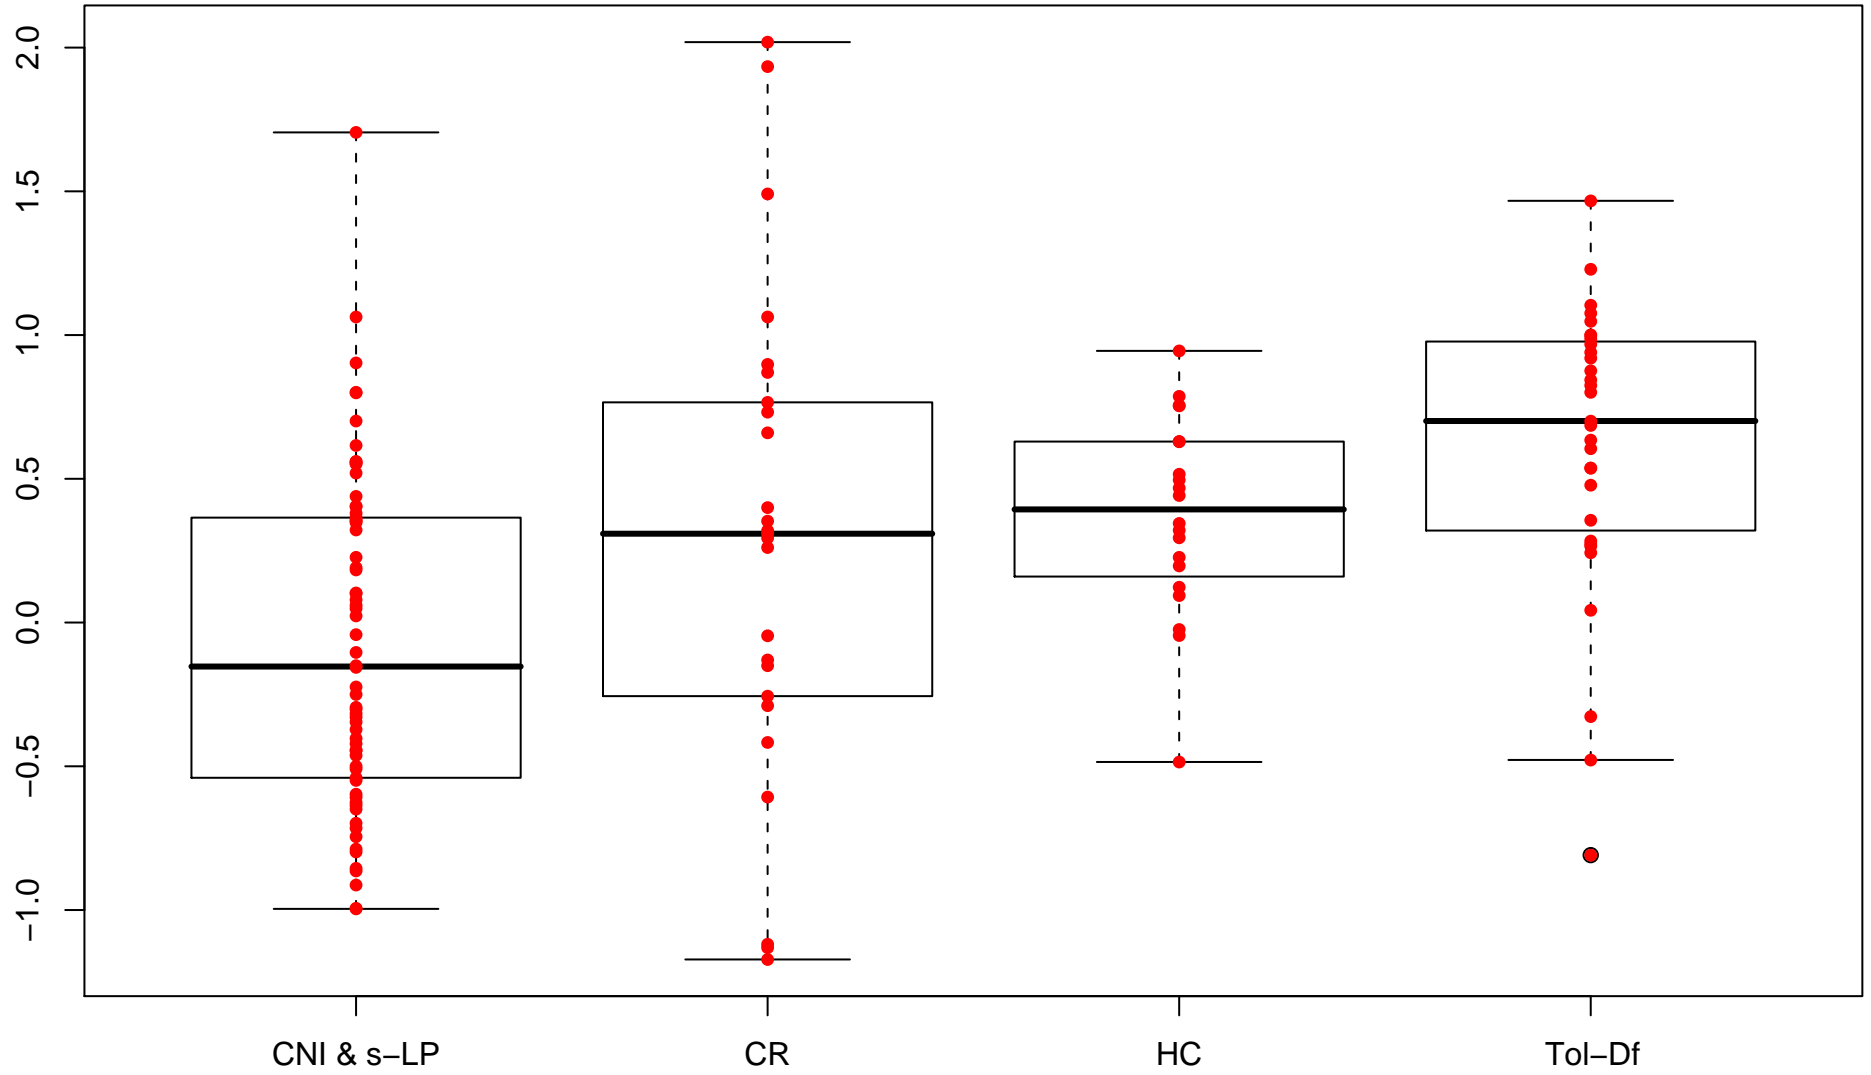

Rank 129 : ABCD1  
1.4275e-06

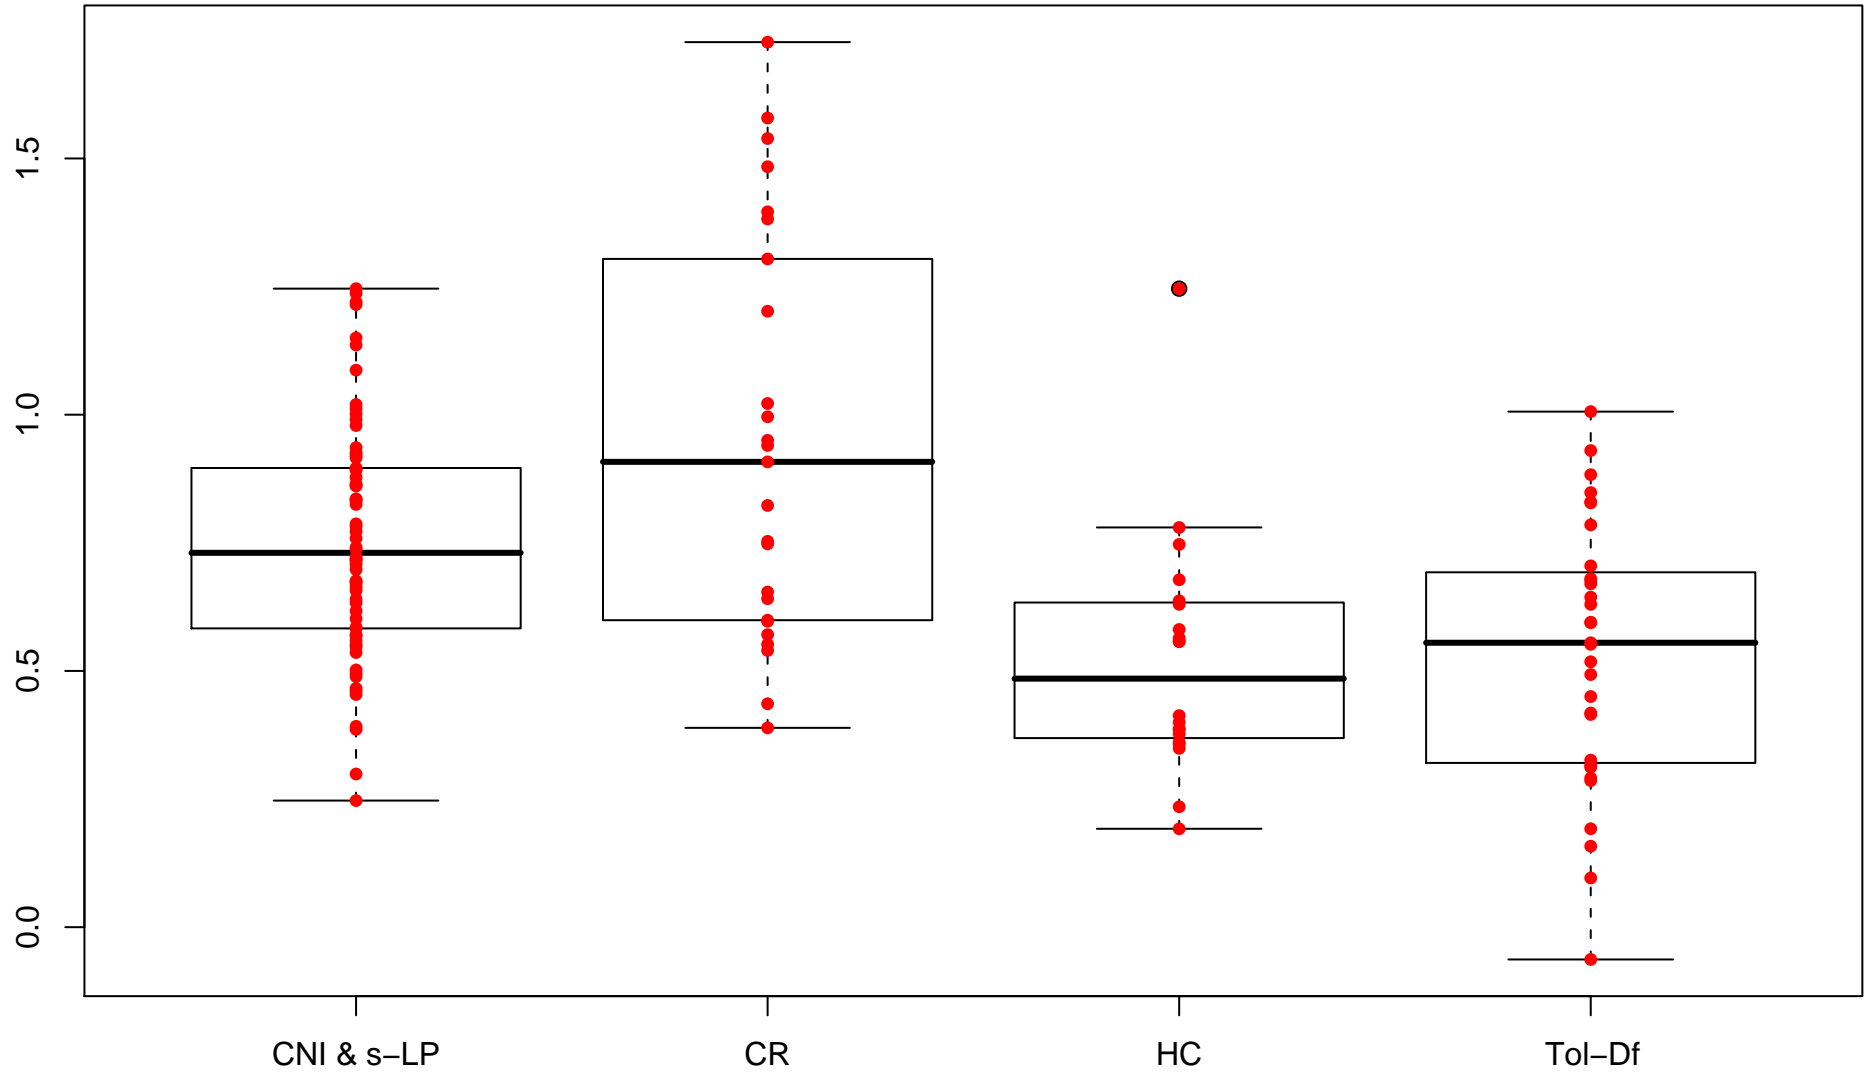

Rank 130 : UVRAG  
1.4686e-06

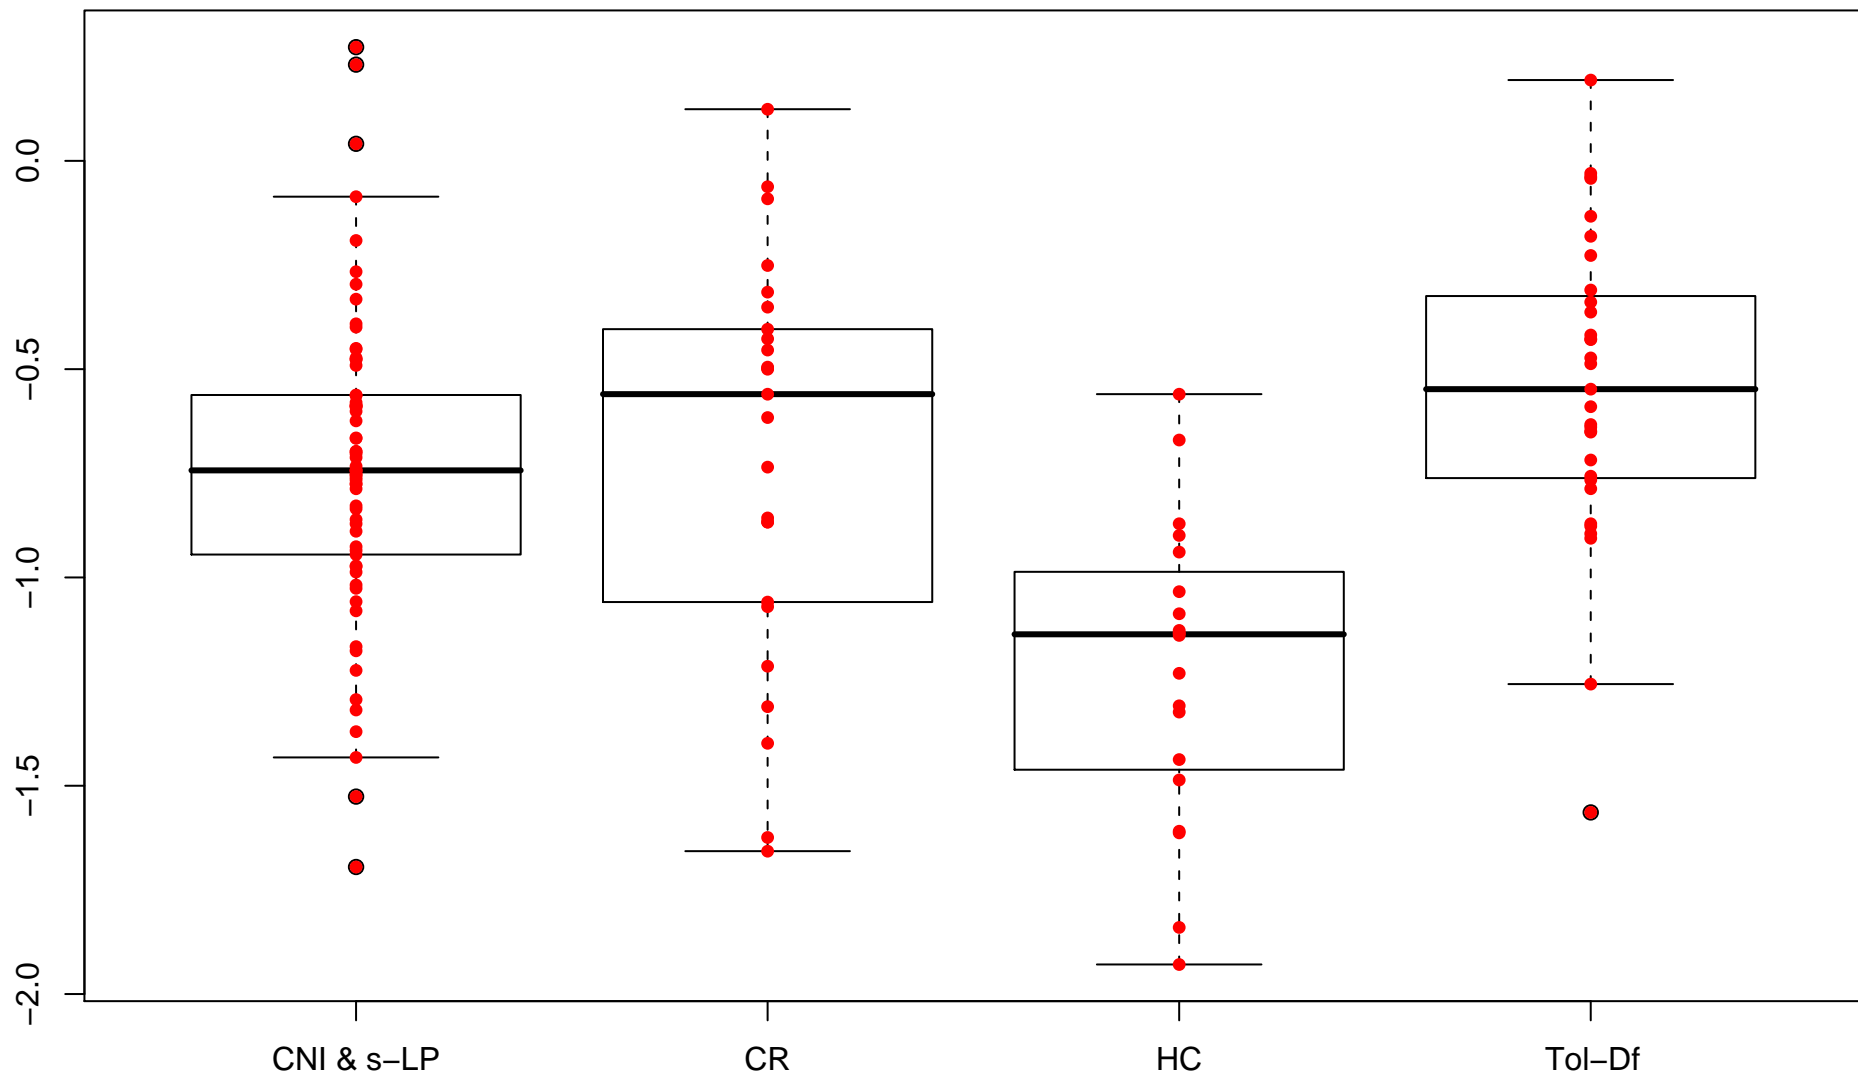

Rank 131 : PPIL3  
1.4701e-06

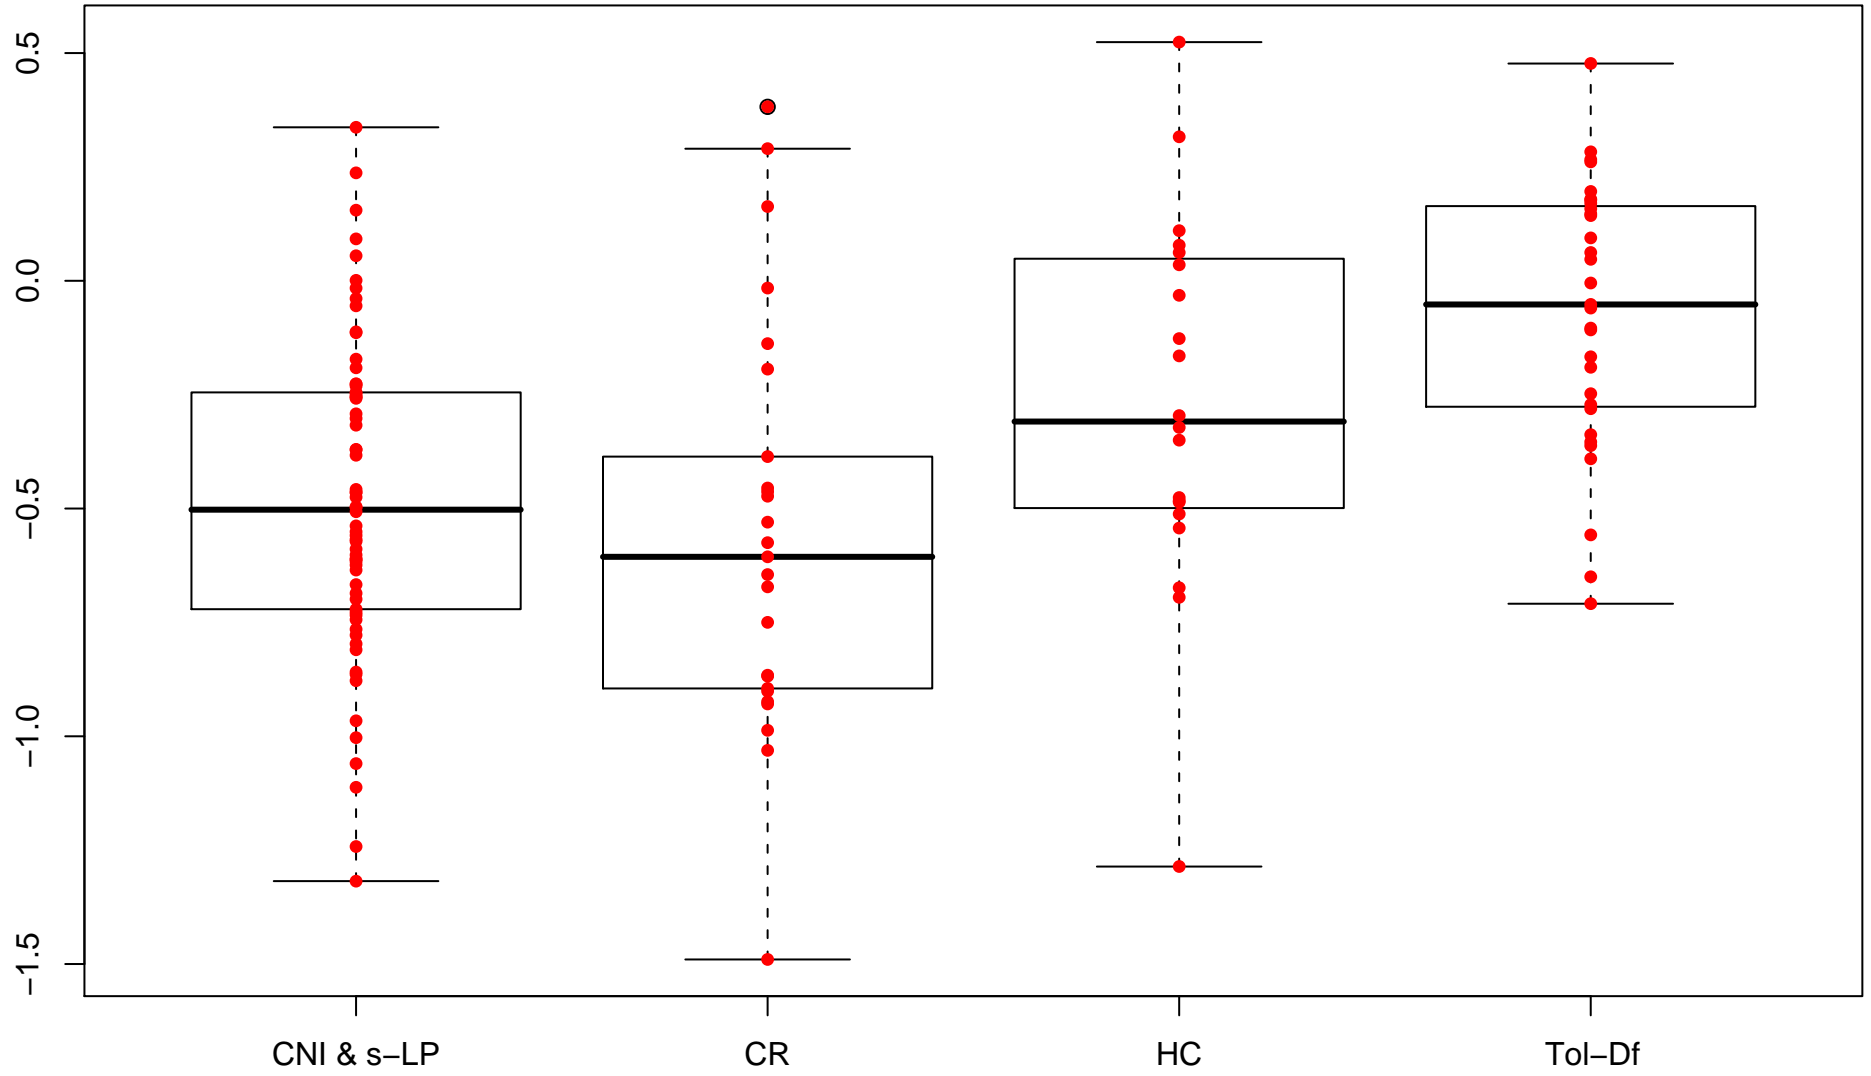

Rank 132 : TNFAIP8  
1.4748e-06

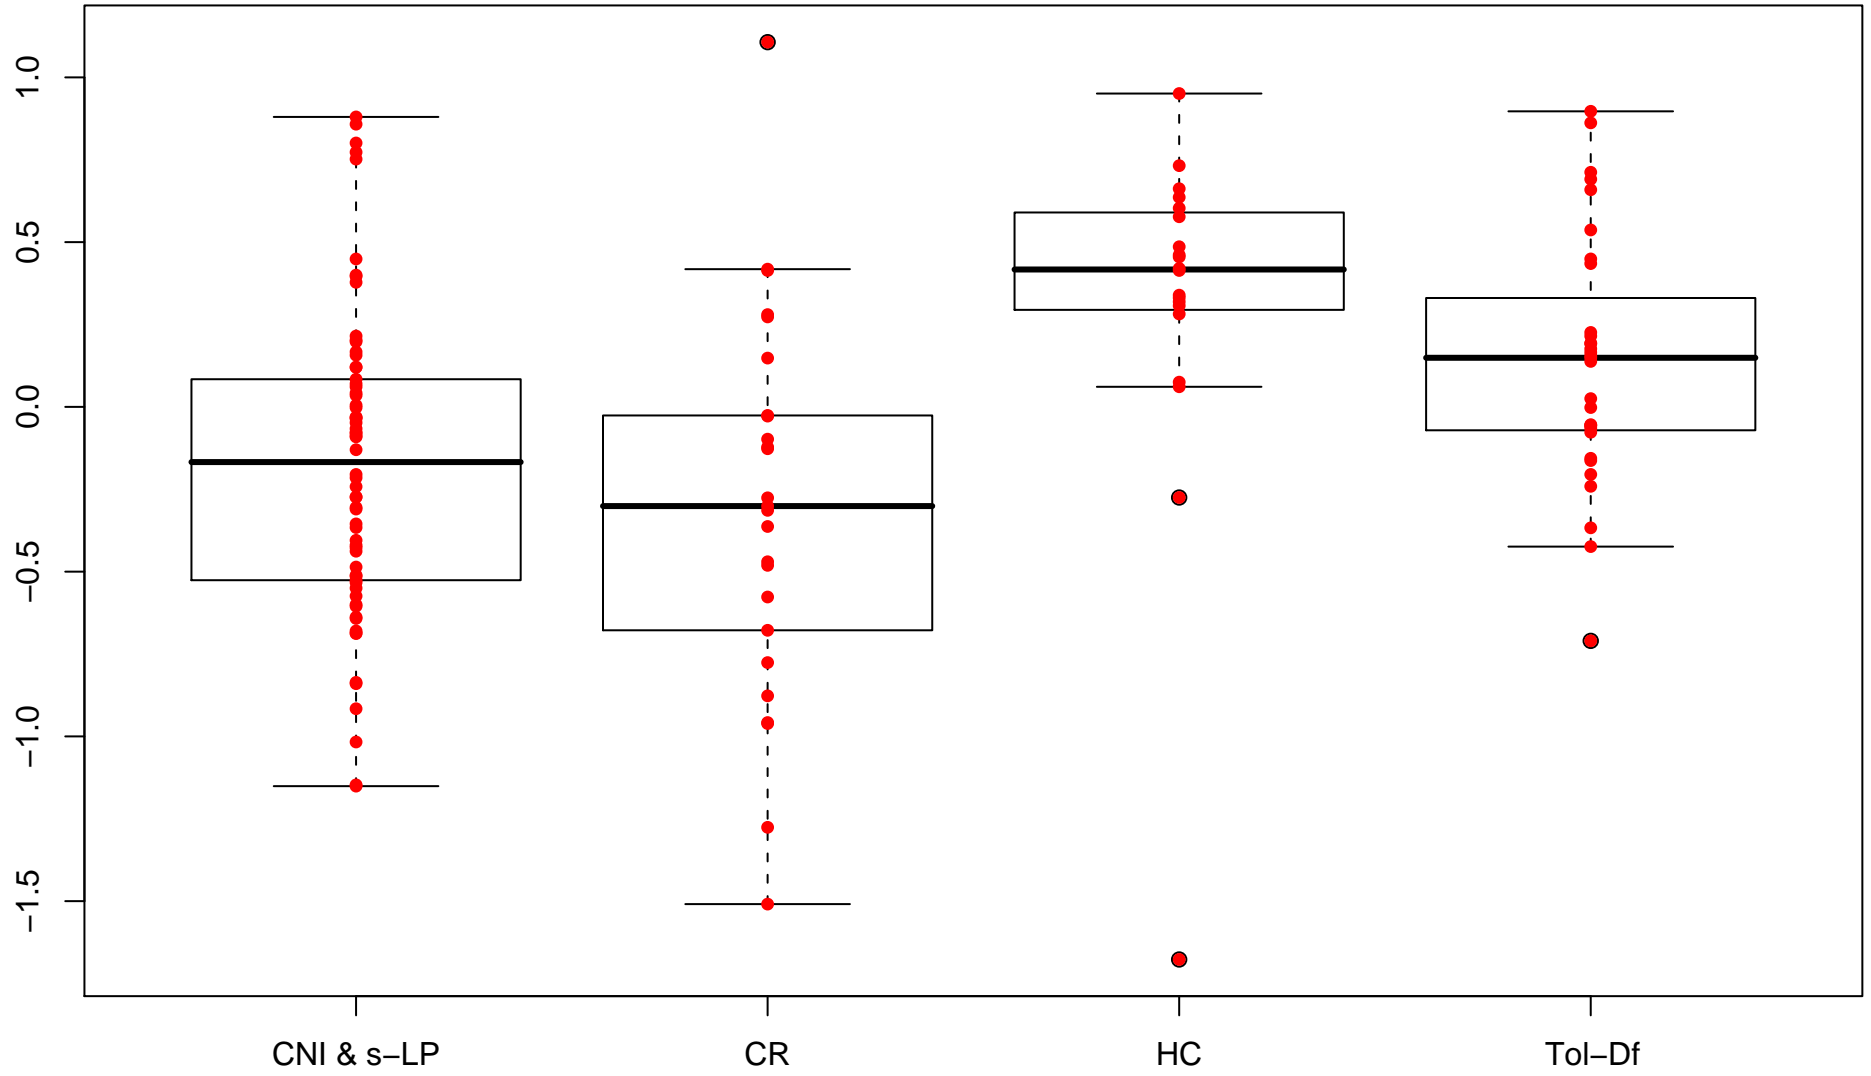

Rank 133 : OLFM4  
1.4769e-06

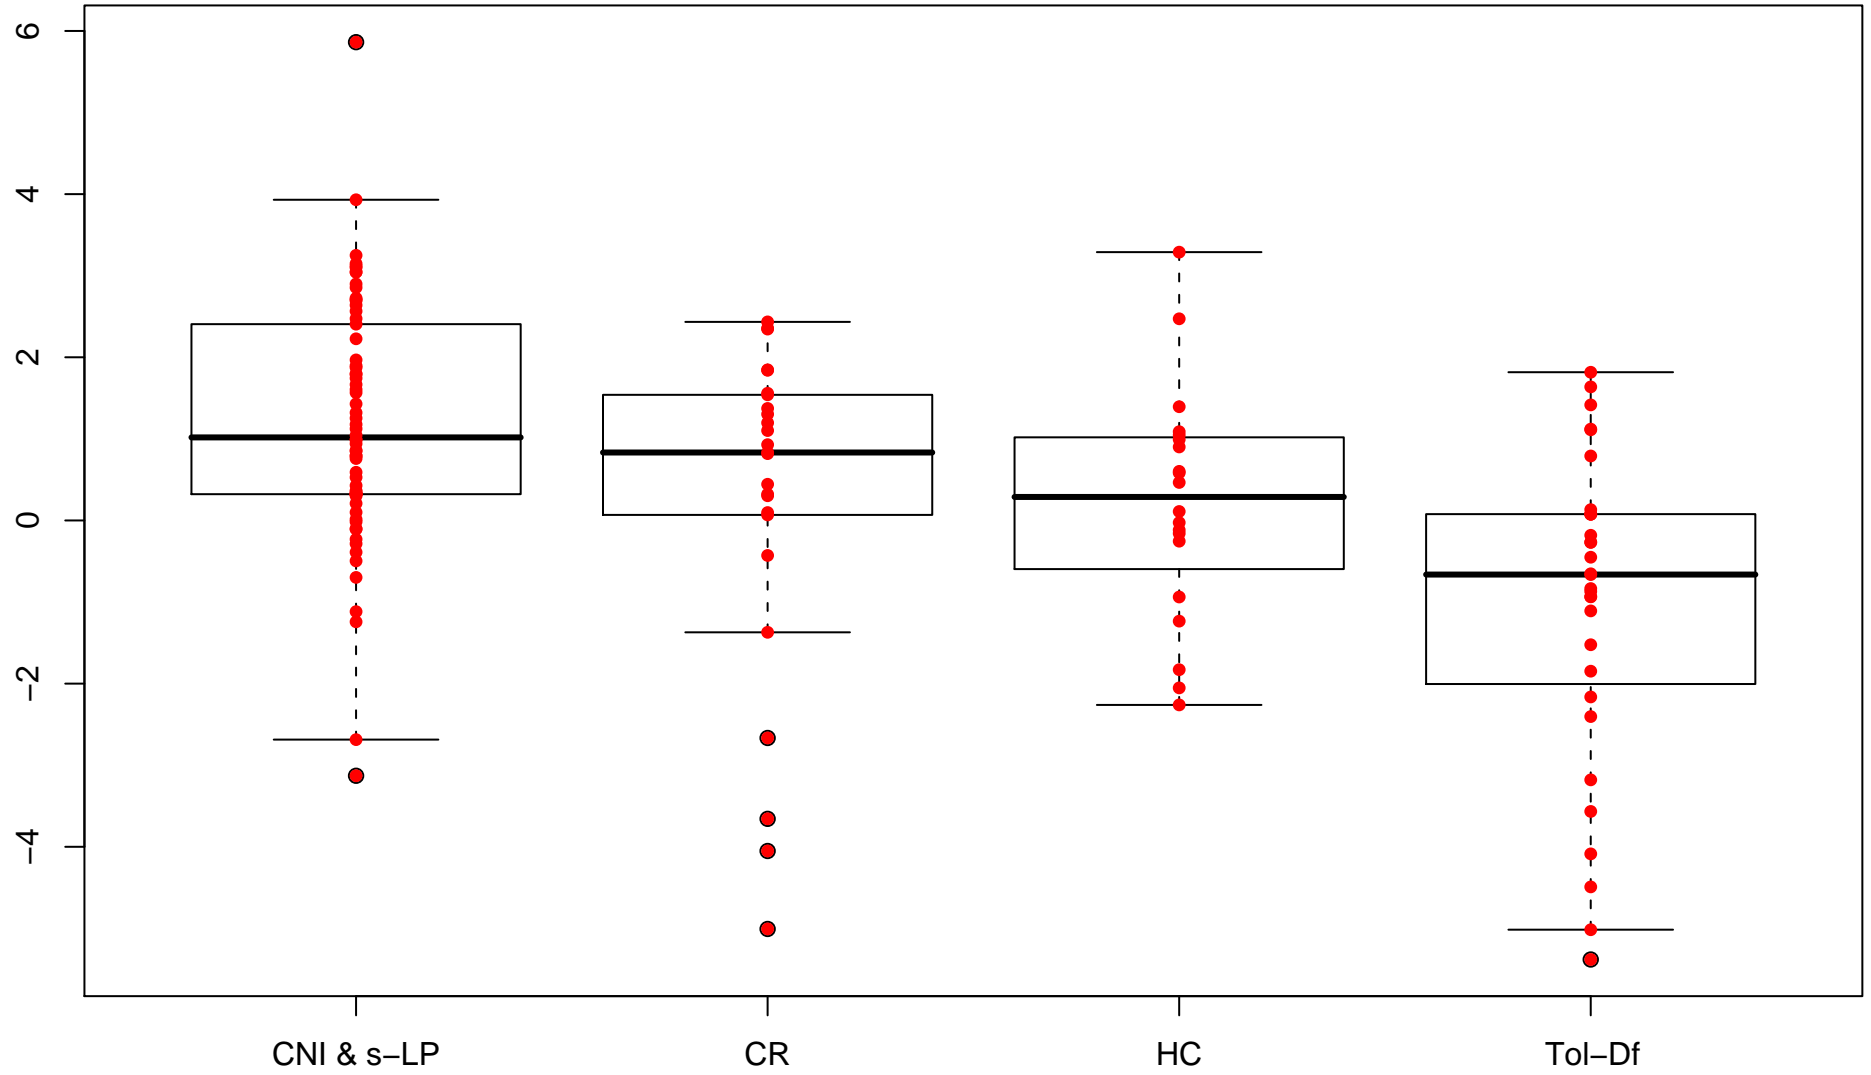

Rank 134 : BAG1  
1.4841e-06

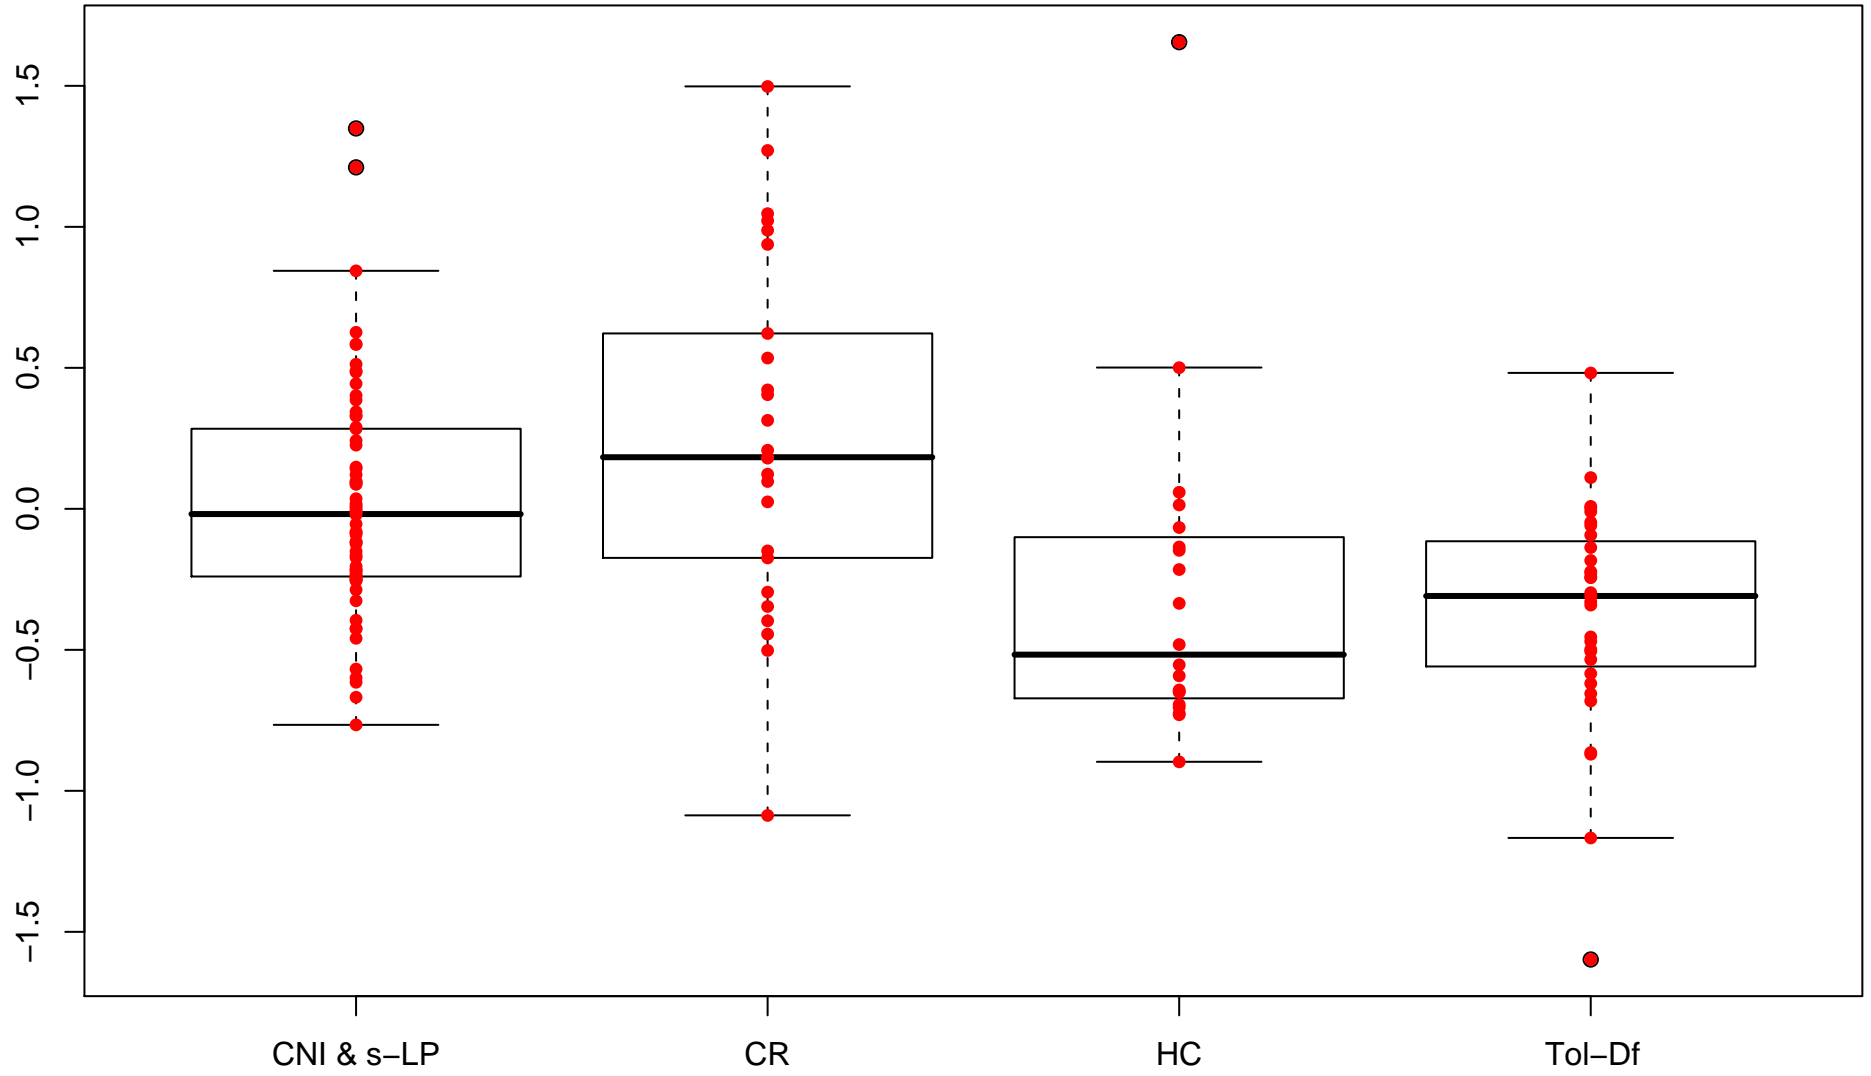

Rank 135 : CXORF21  
1.6388e-06

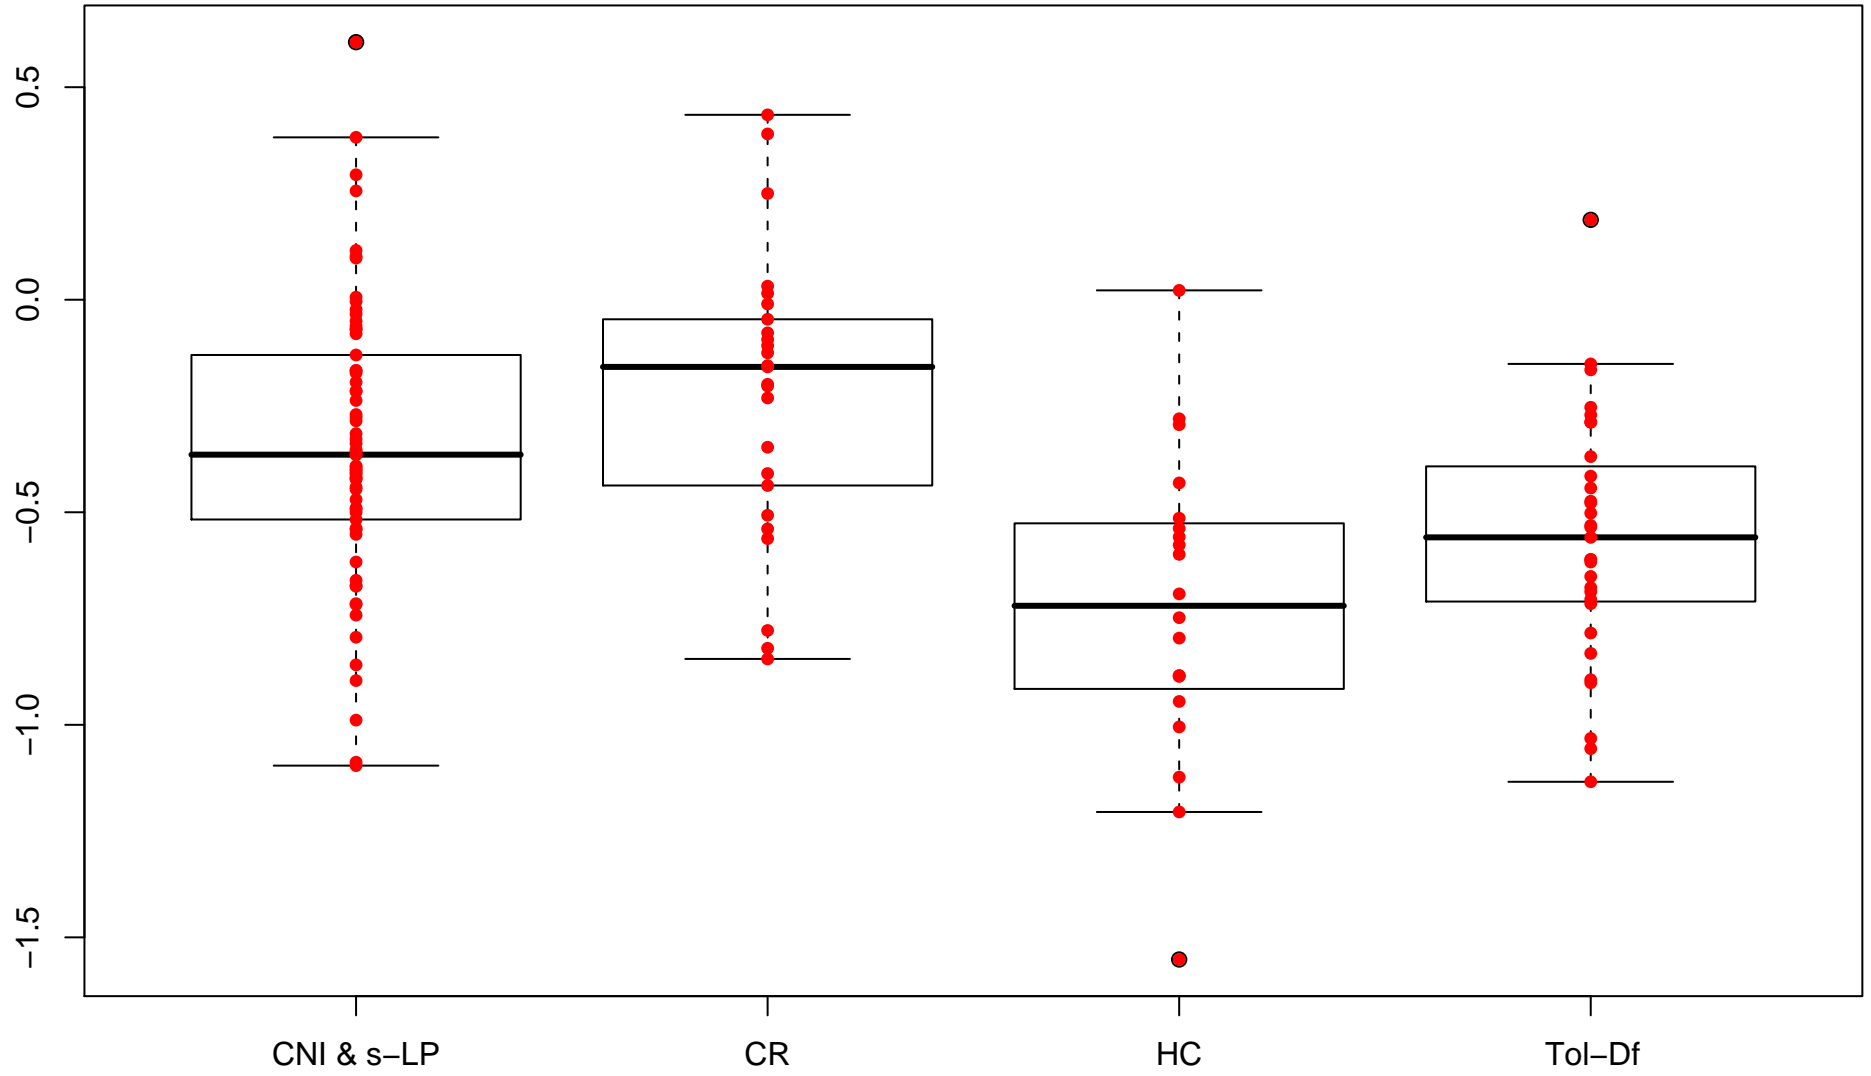



Rank 136 : PIK3IP1  
1.6527e-06

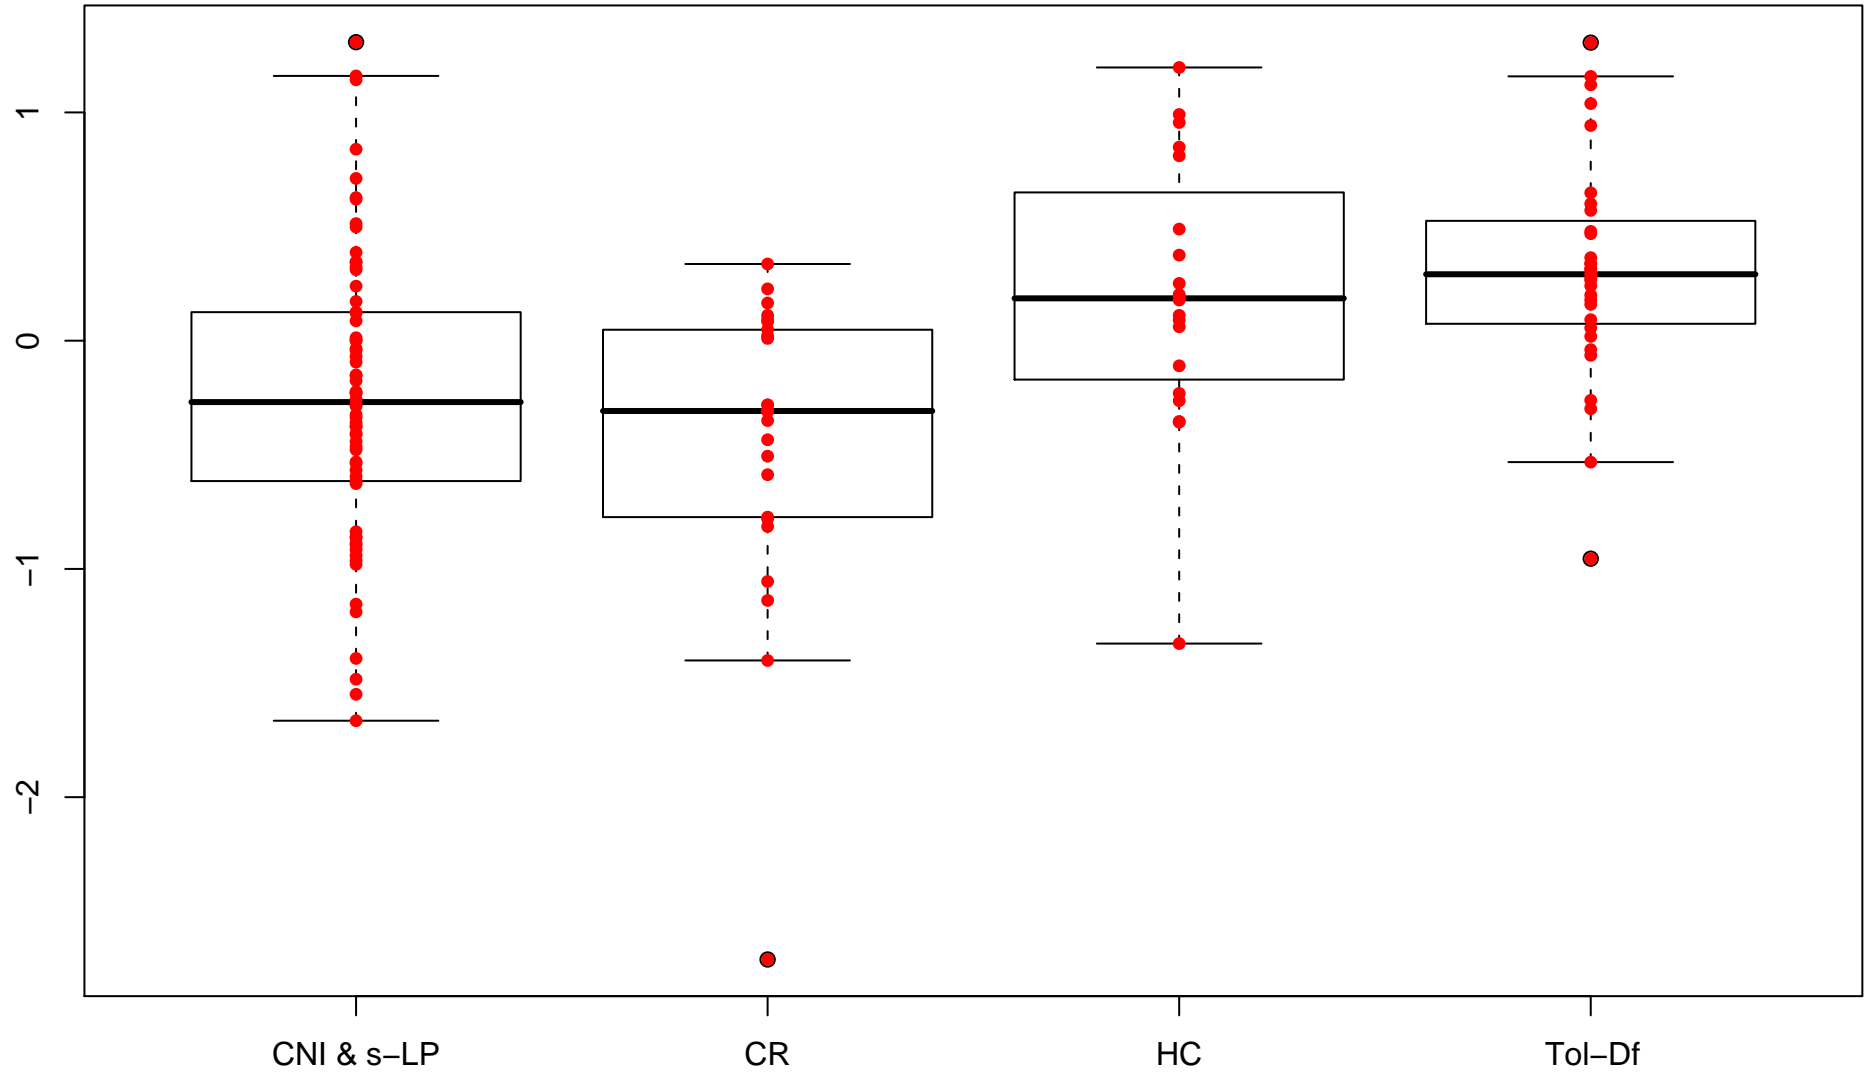

Rank 137 : LETMD1  
1.6779e-06

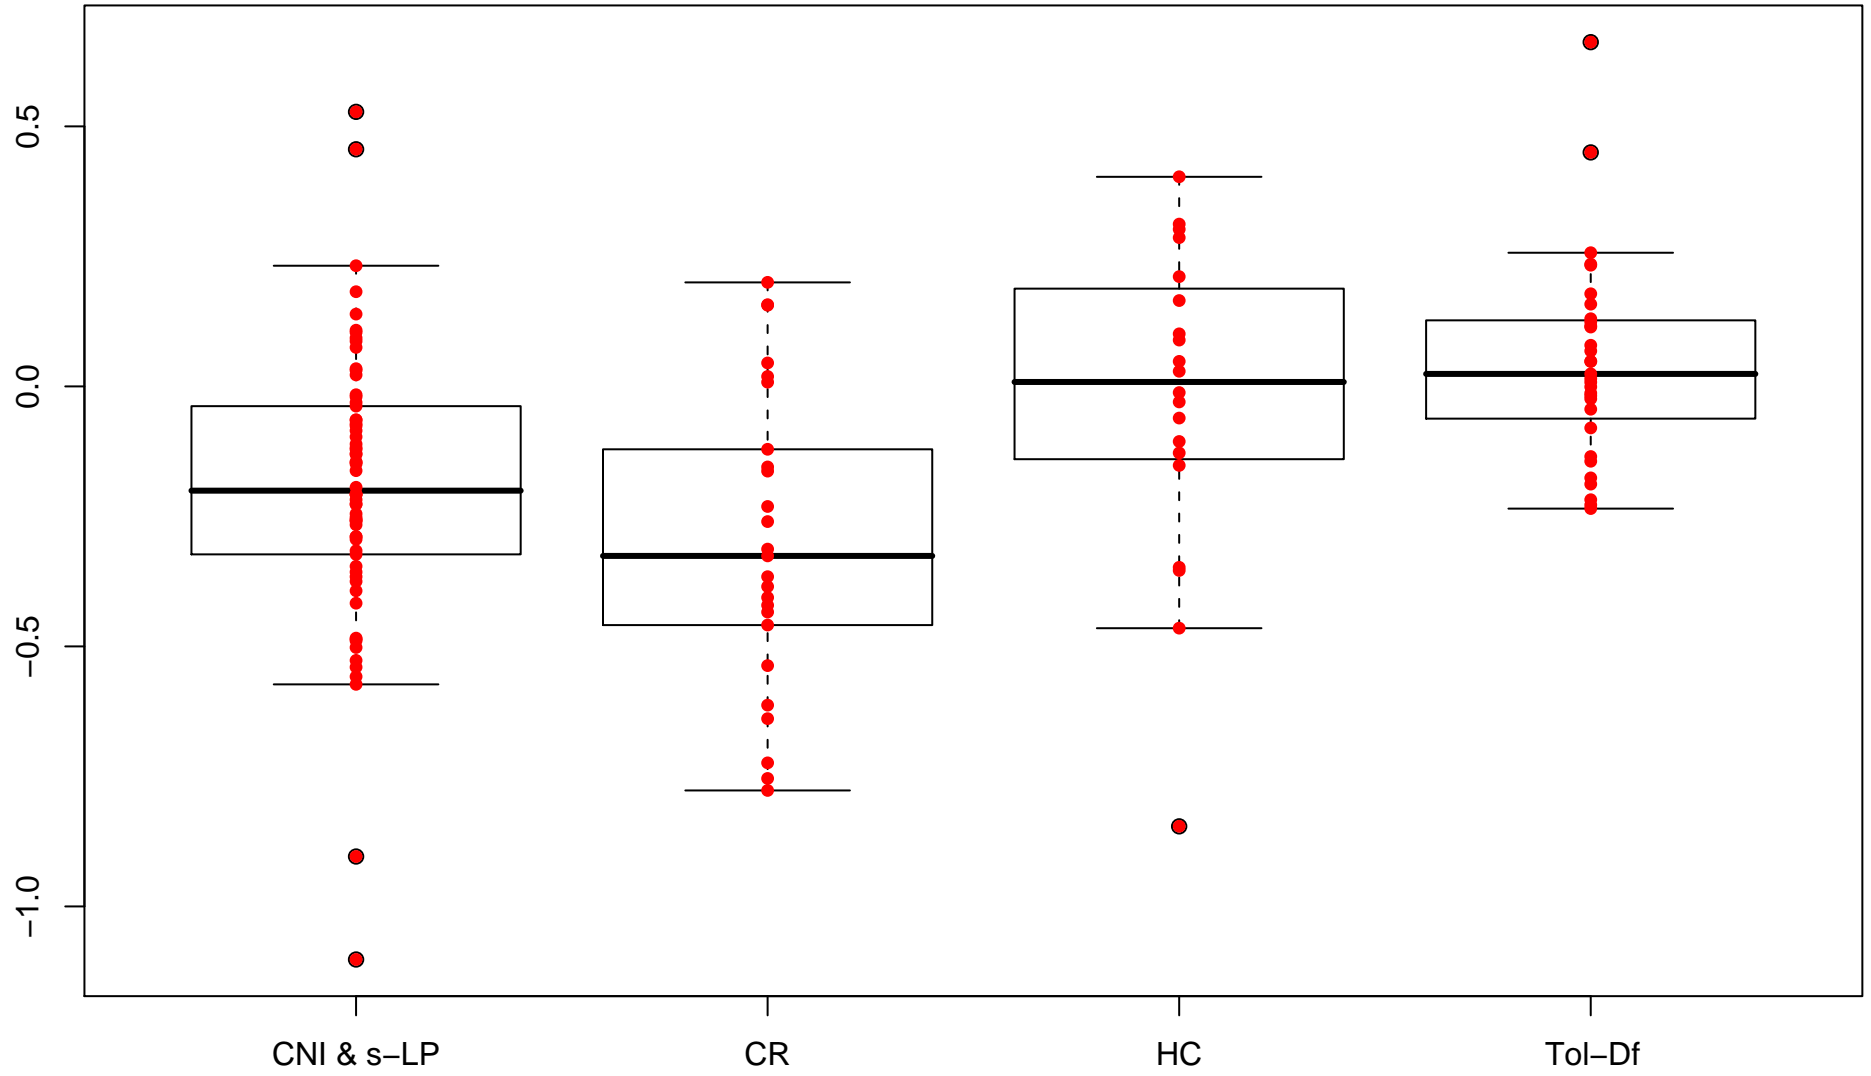

Rank 138 : ZBED5  
1.6949e-06

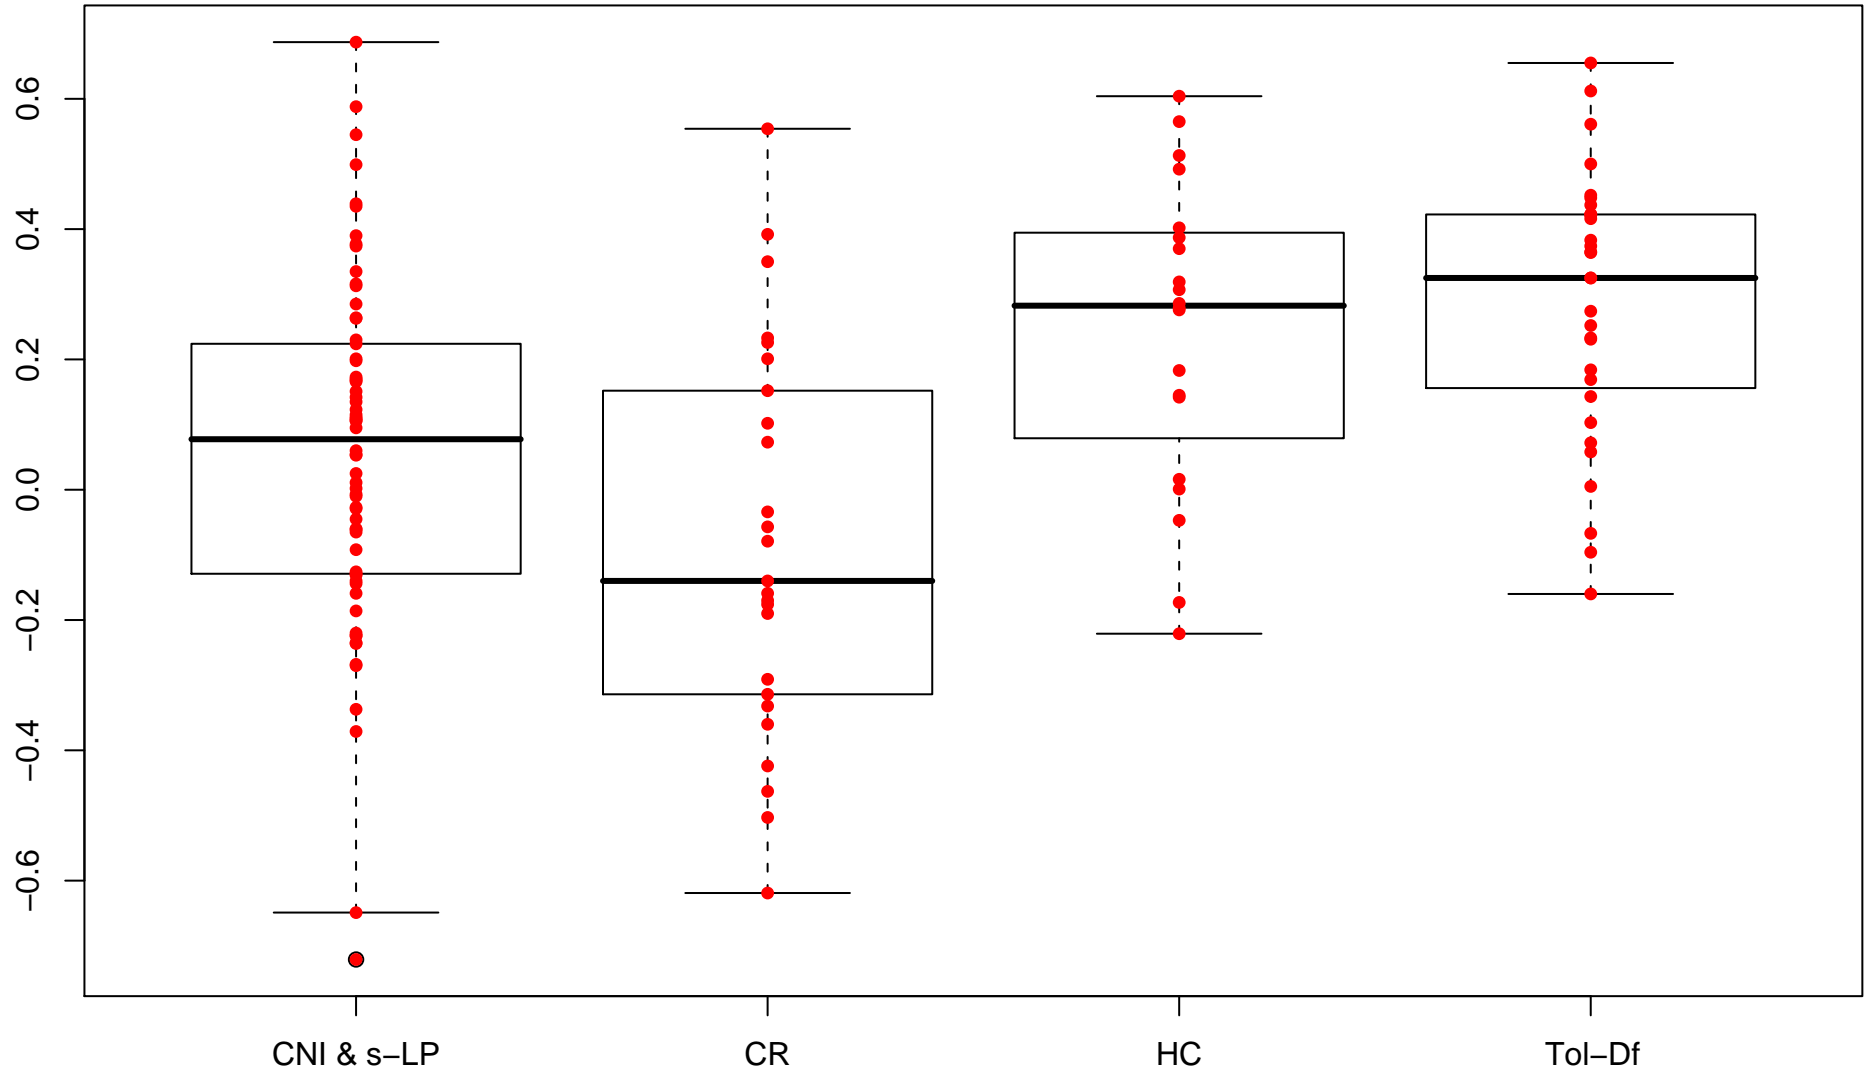

Rank 139 : TIMP2;LOC732206  
1.6986e-06

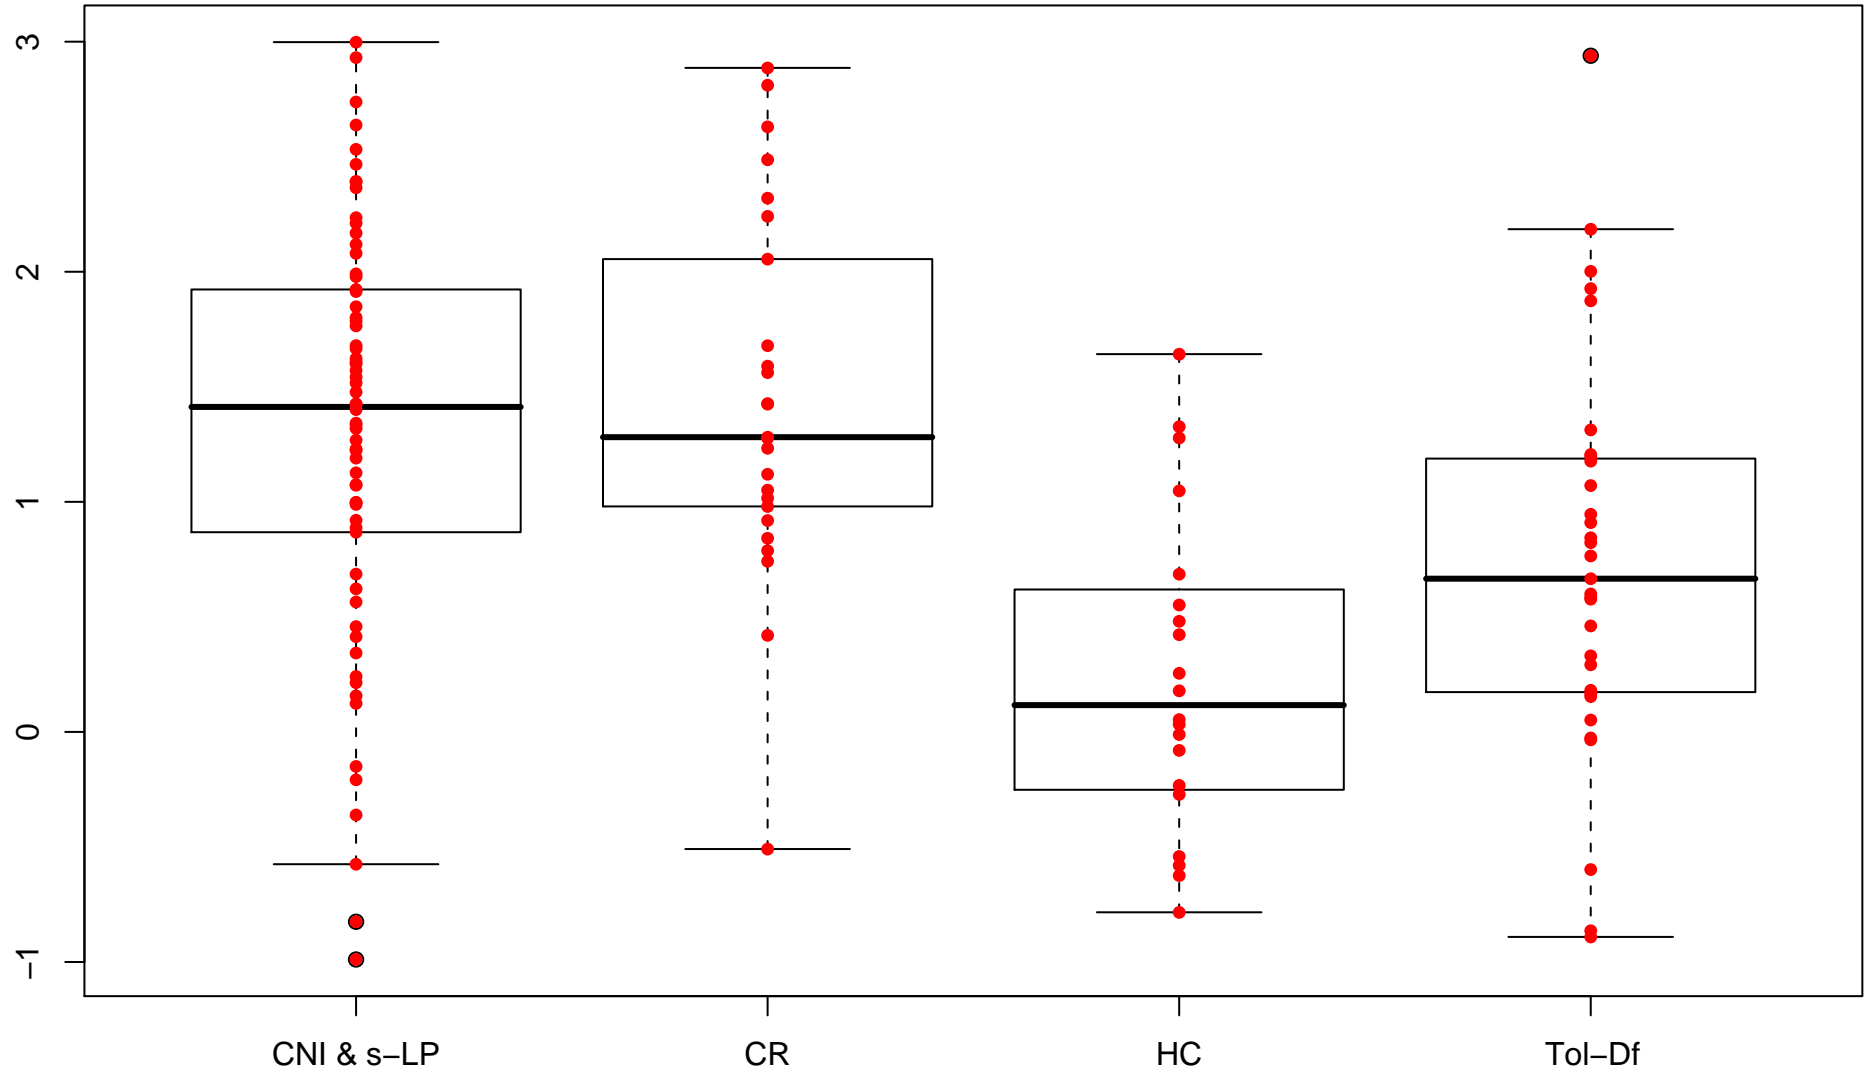

Rank 140 : EEF1A1;EEF1AL7  
1.7305e-06

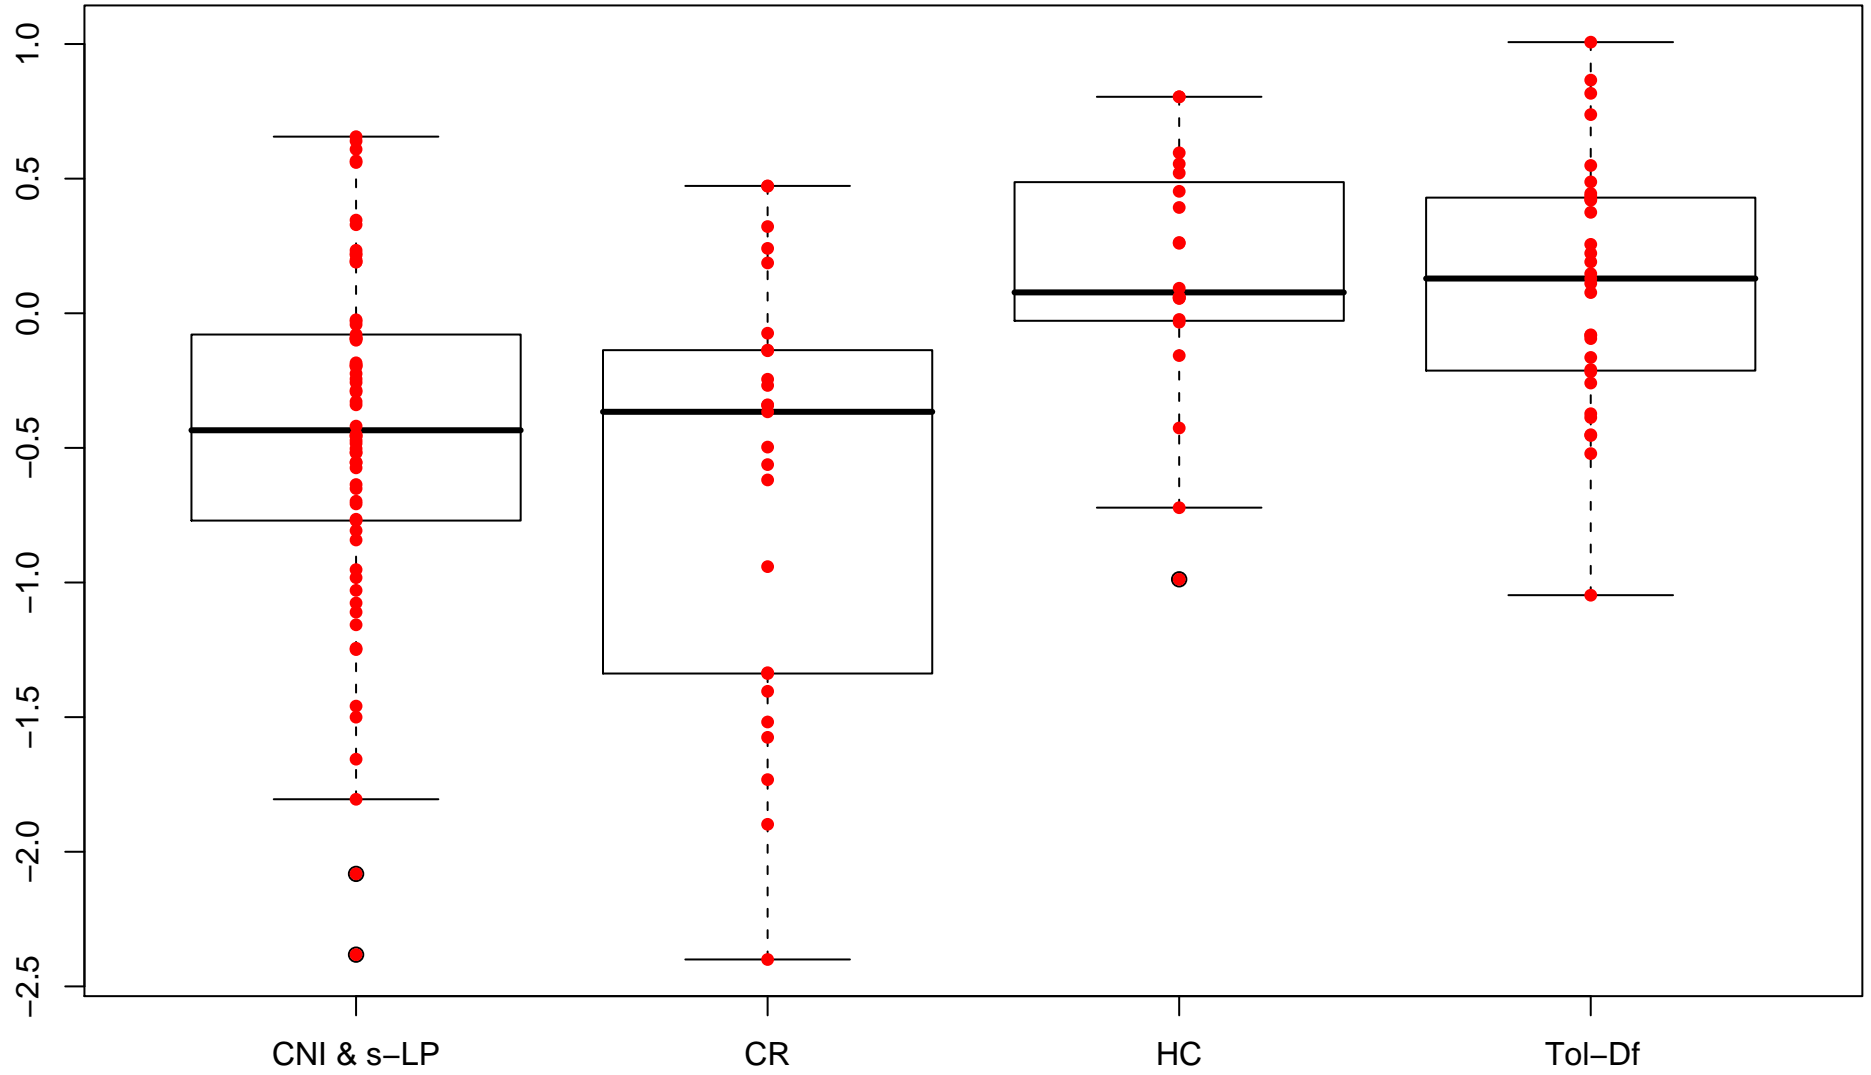

Rank 141 : NUBPL  
1.7398e-06

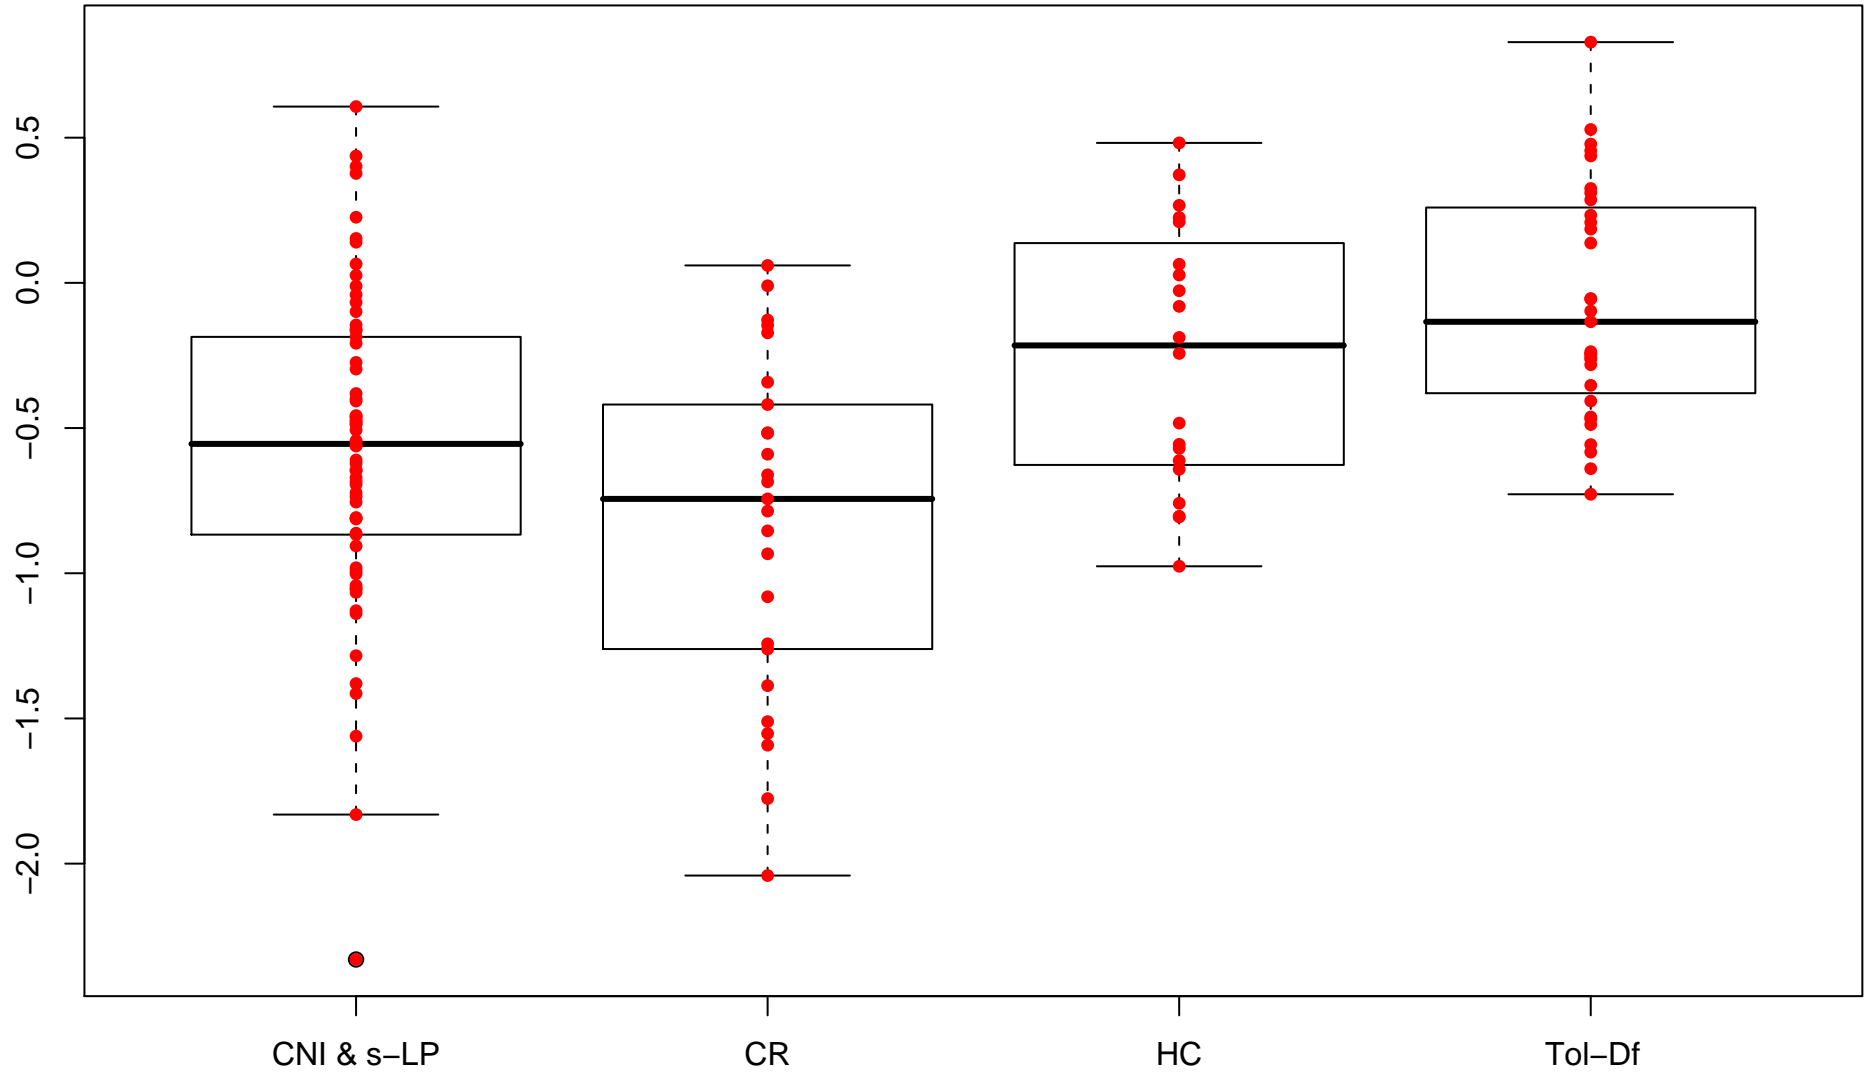

Rank 142 : HOXB2  
1.7458e-06

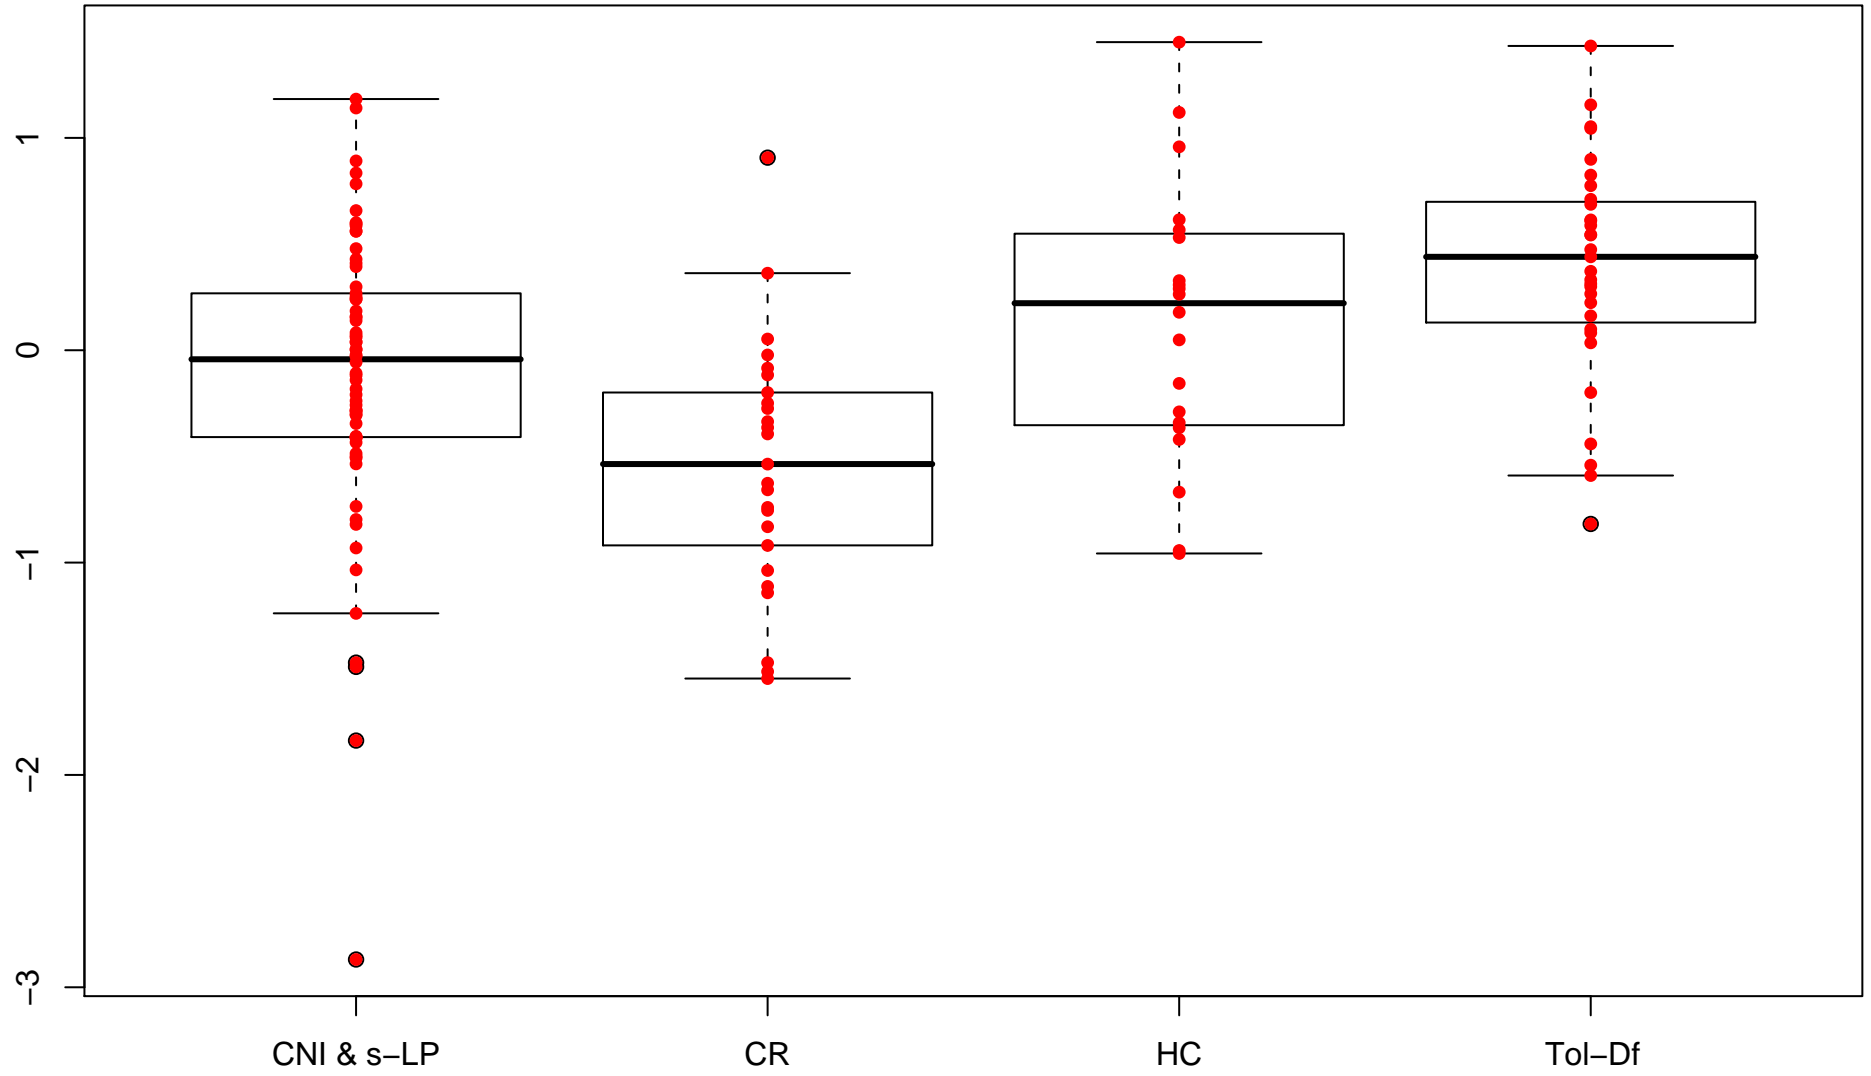

Rank 143 : PTPRF  
1.9735e-06

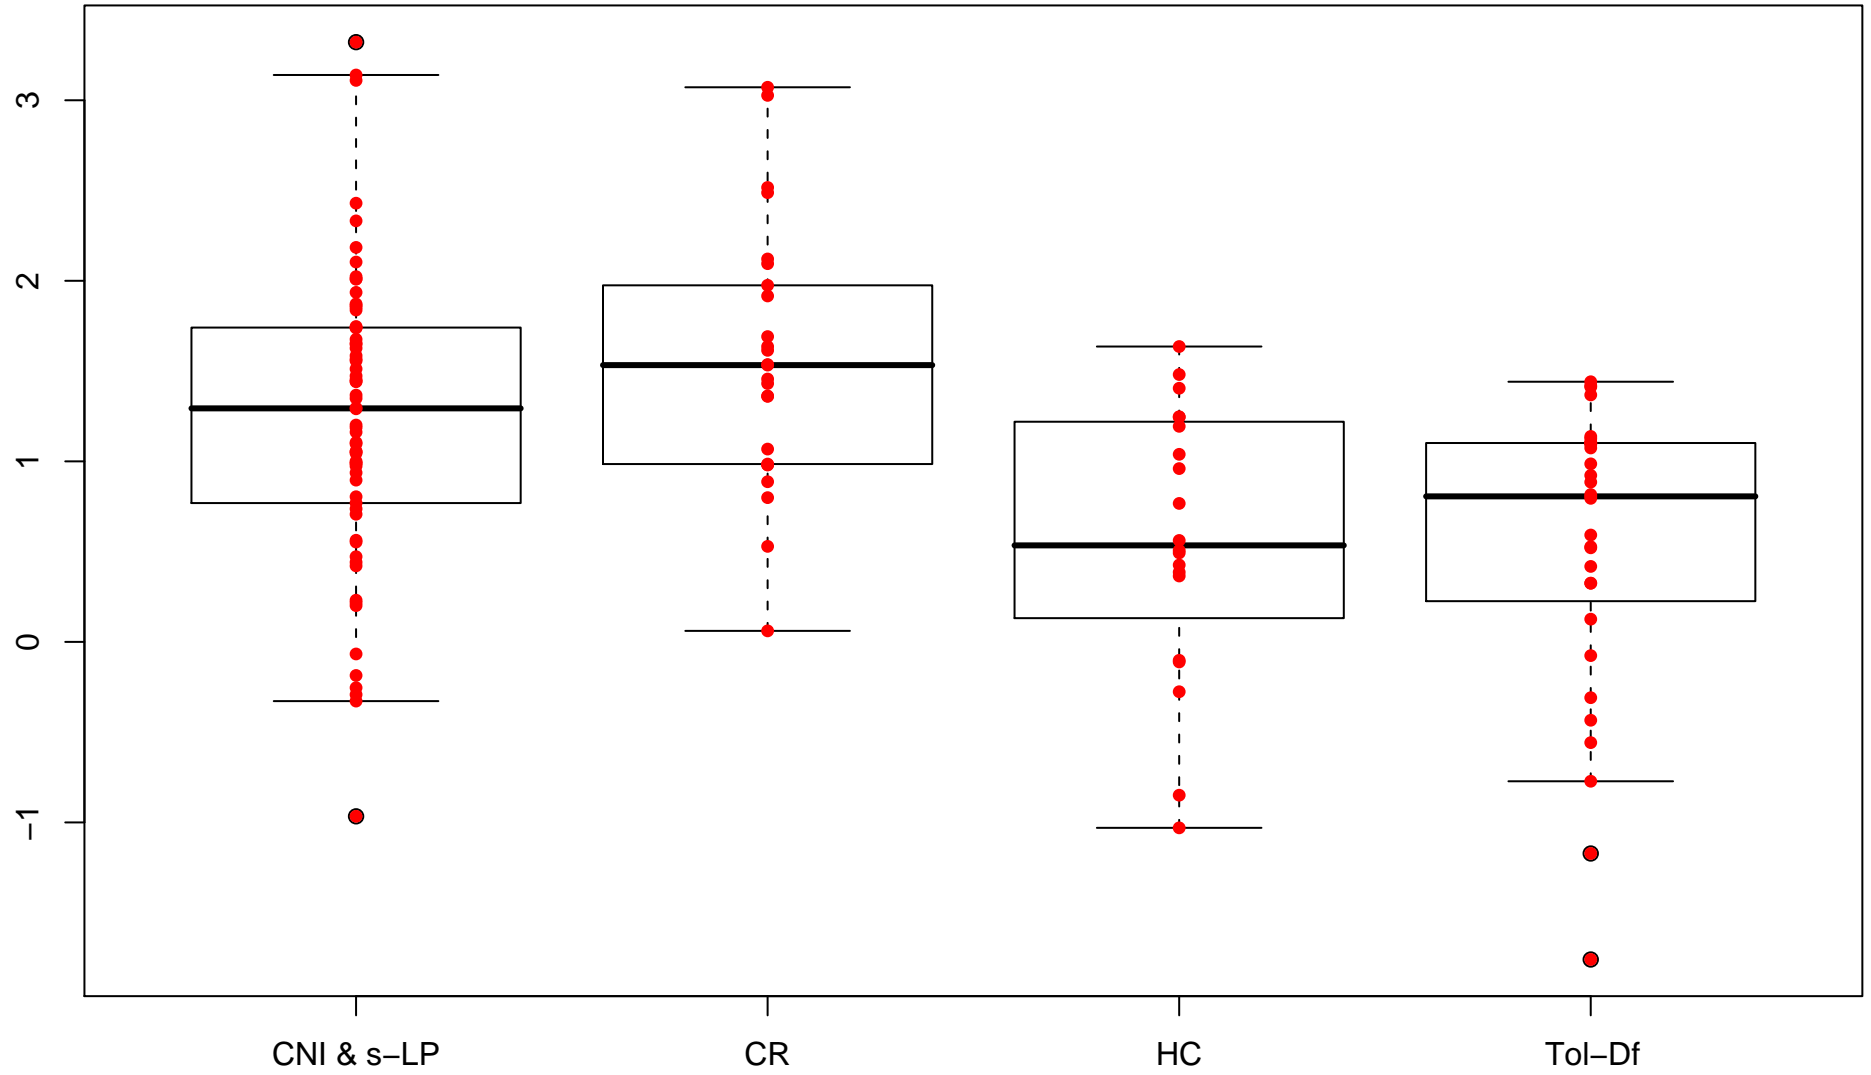



Rank 144 : NELL2  
2.0909e-06

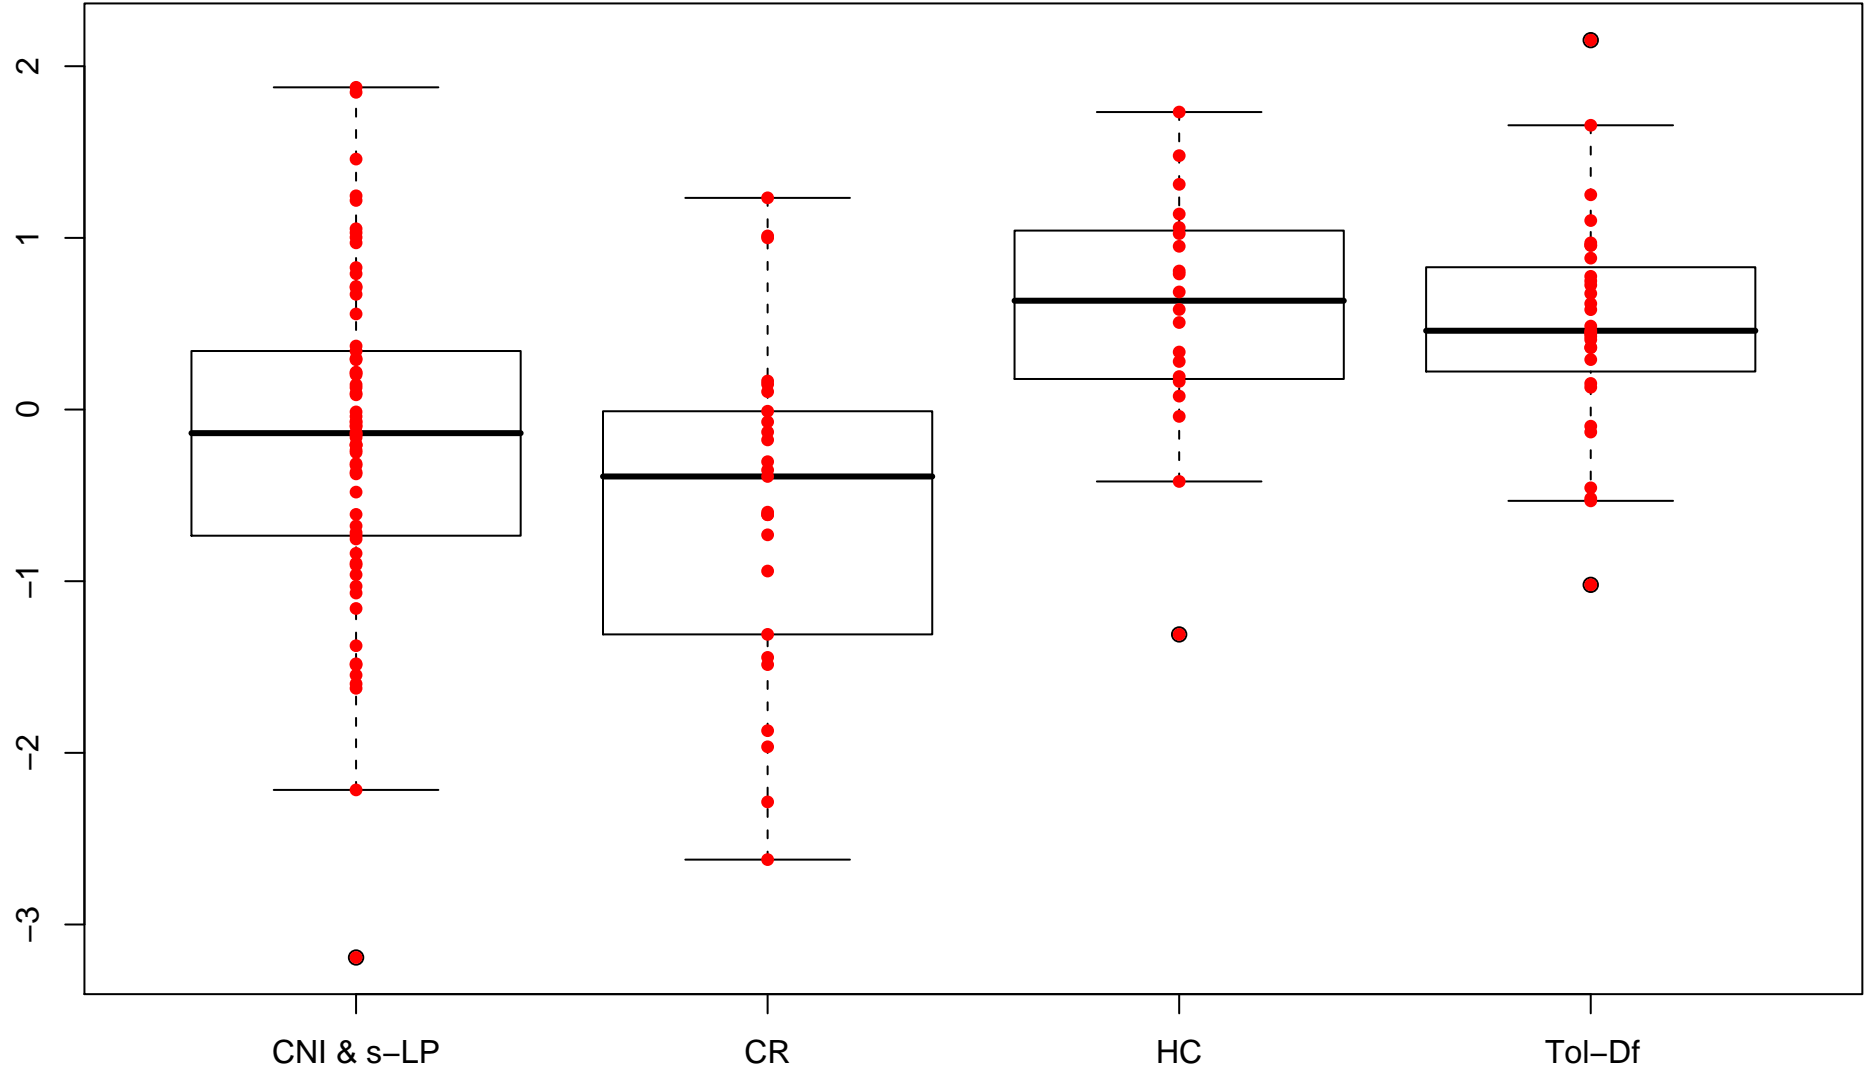

Rank 145 : LCN2  
2.1468e-06

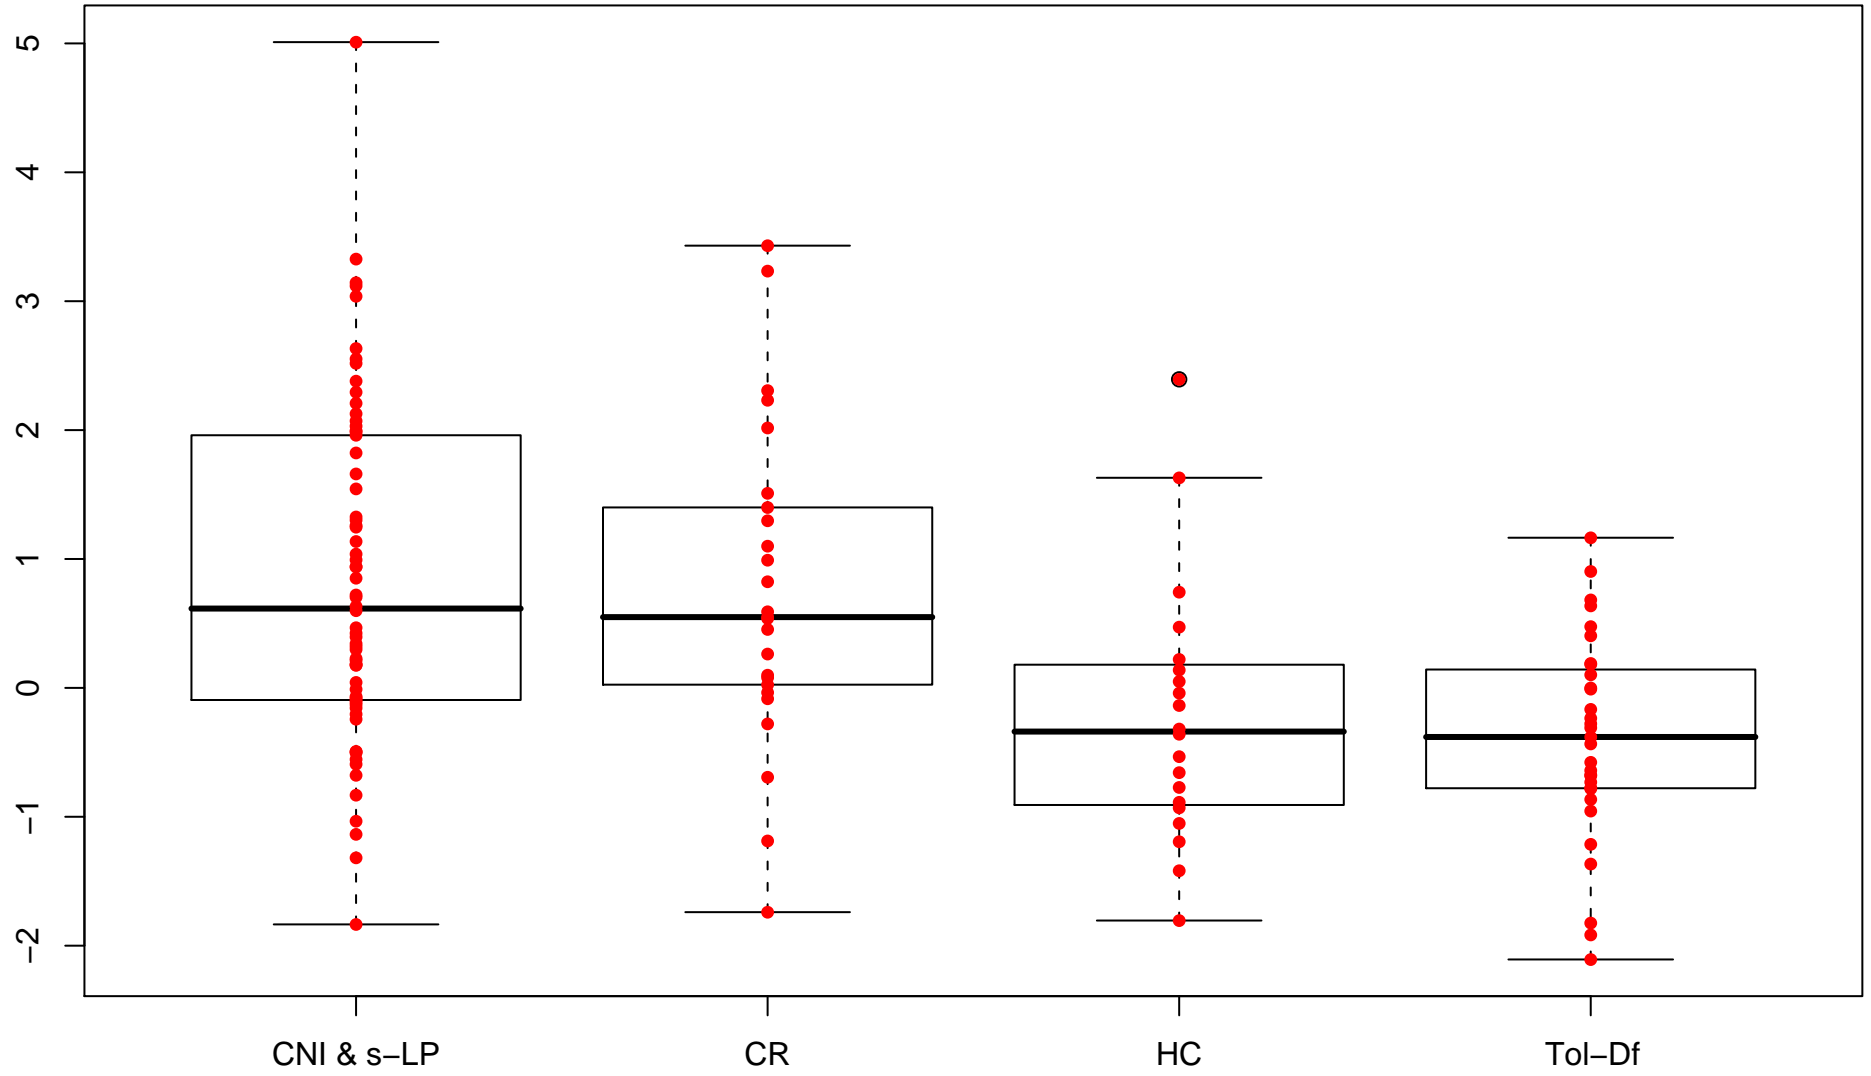

Rank 146 : TCF4

2.1549e-06

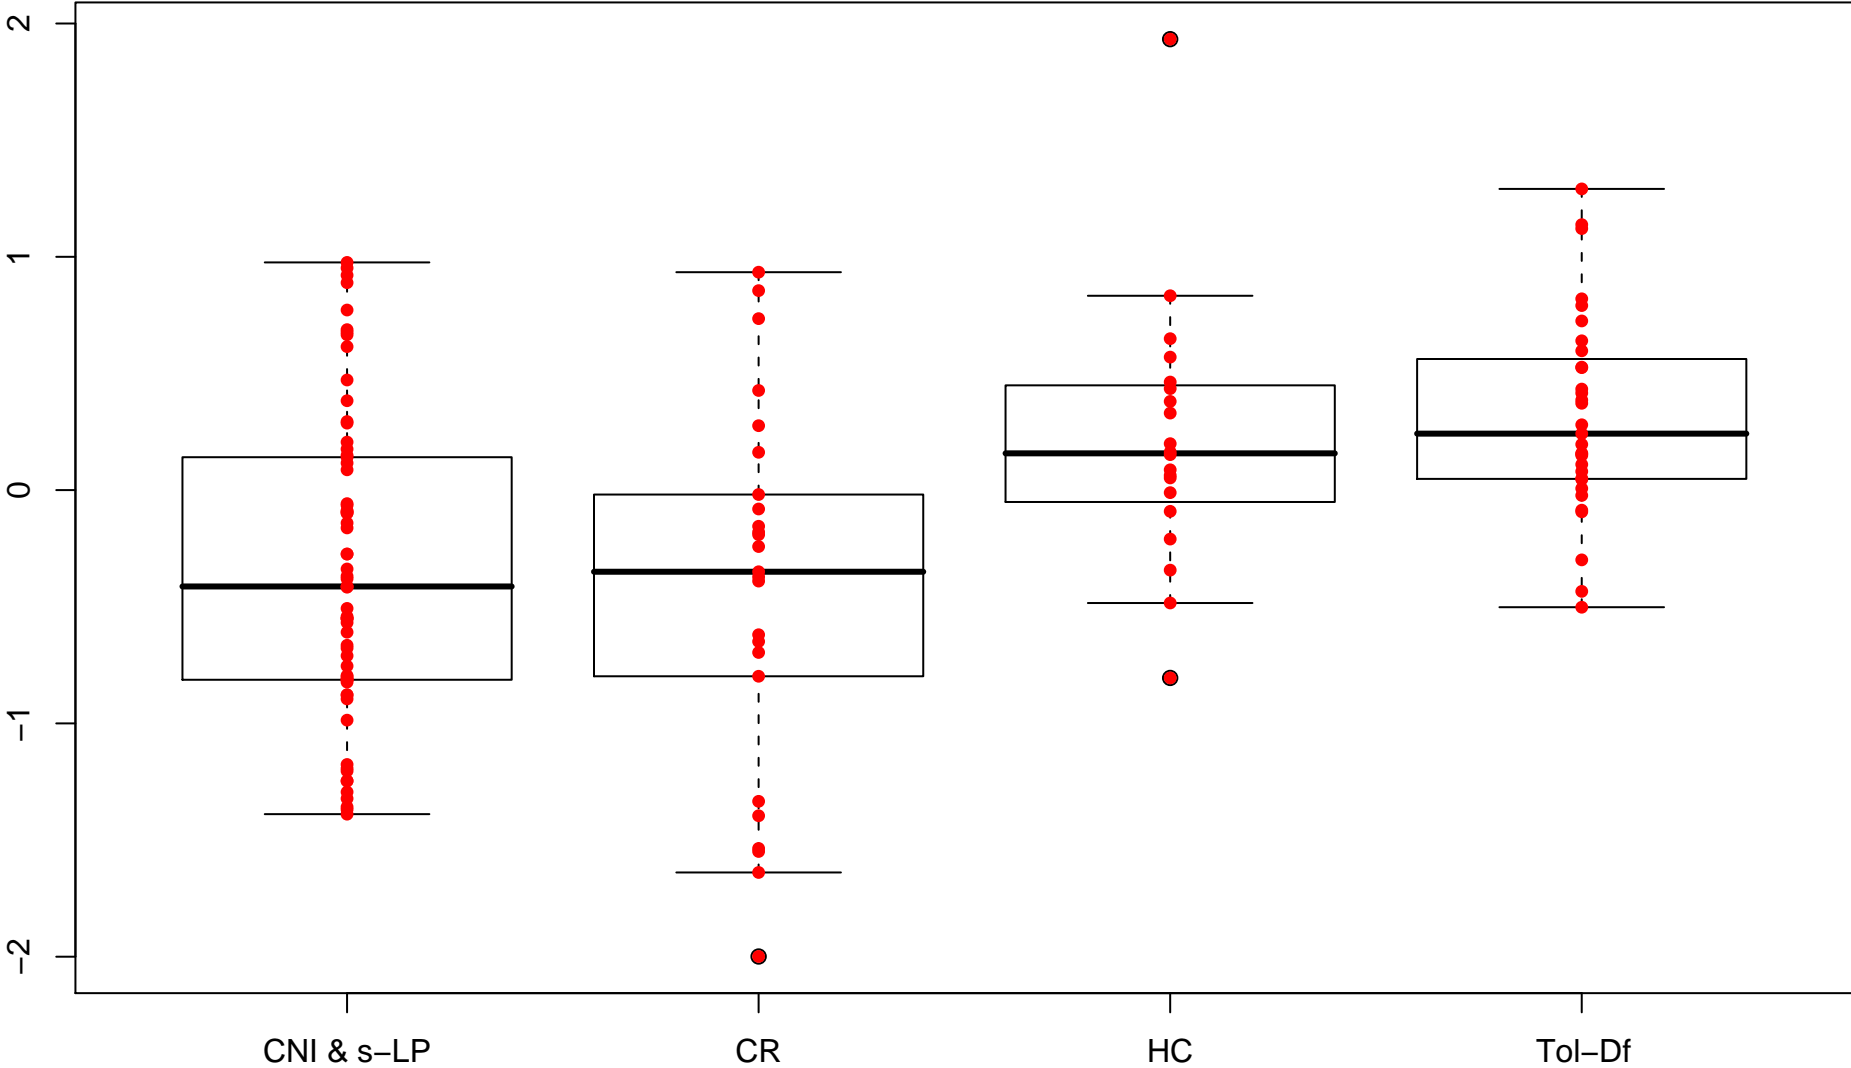

Rank 147 : MARCKSL1  
2.2539e-06

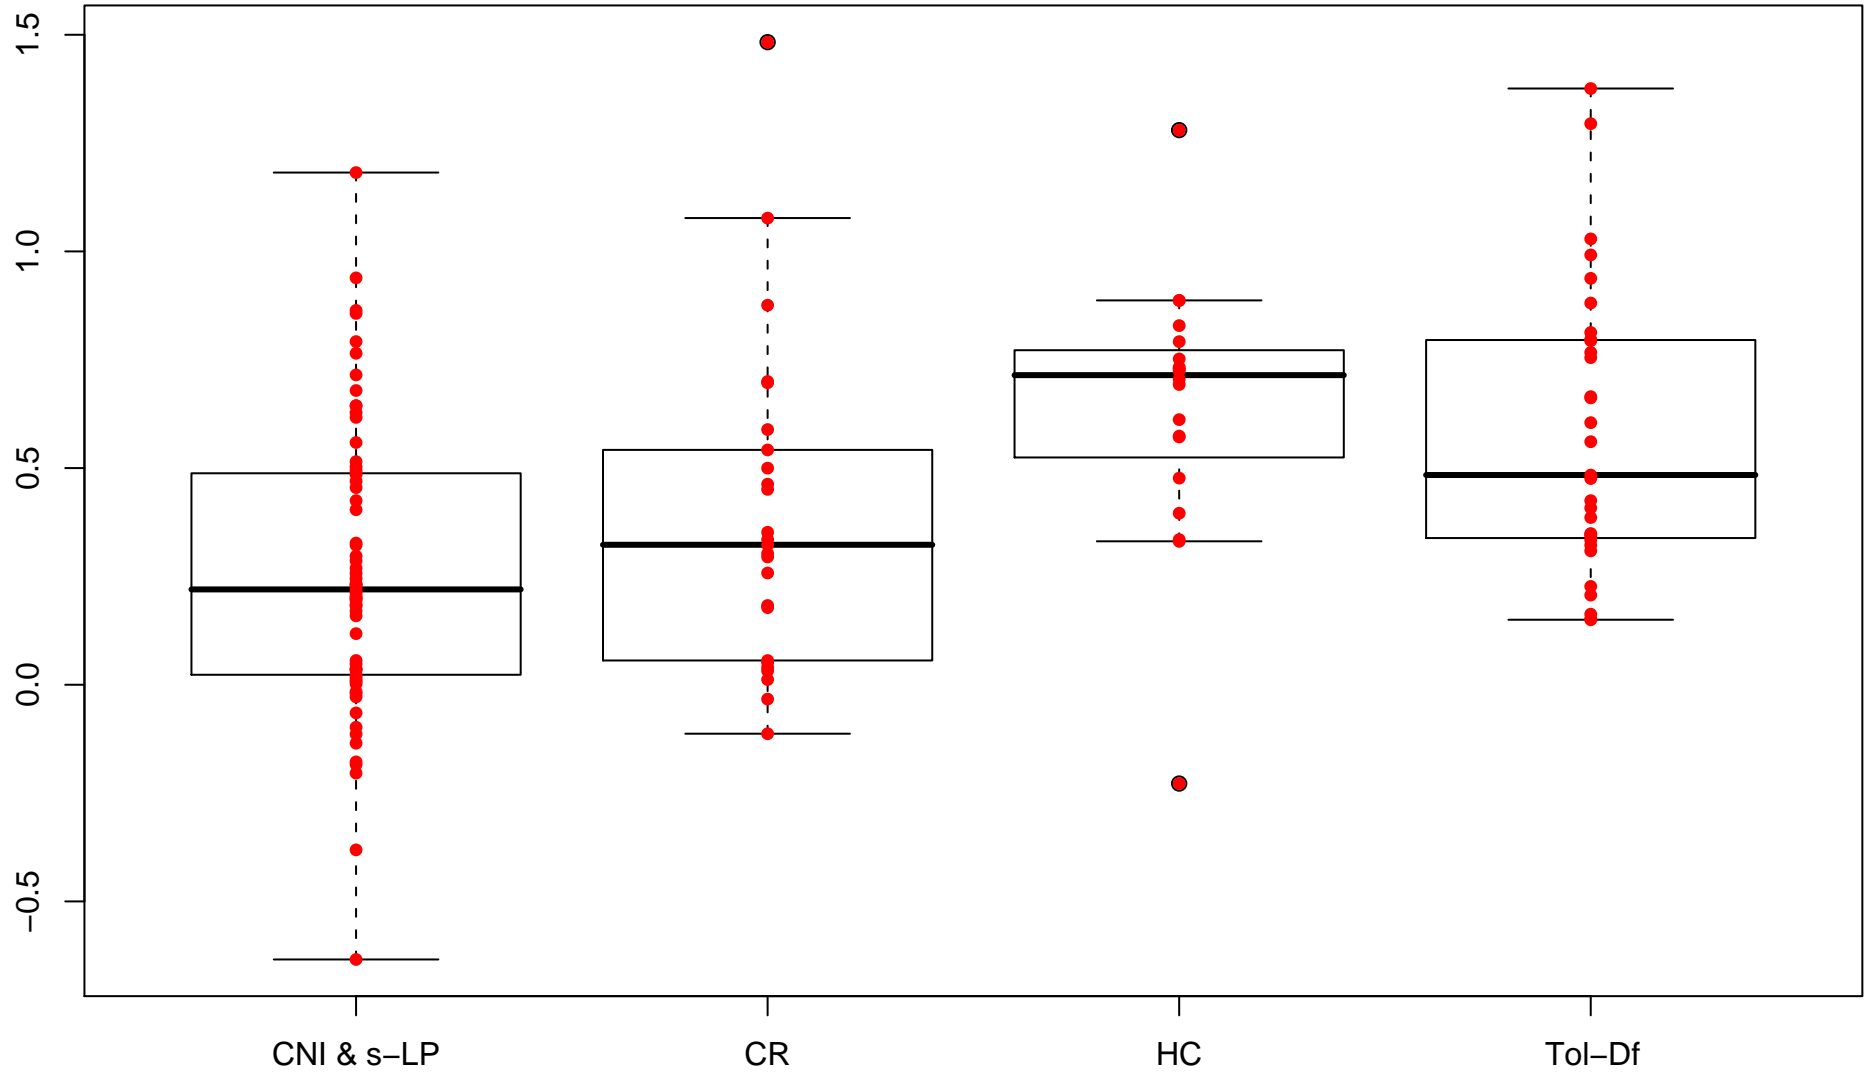

Rank 148 : PSMA1  
2.264e-06

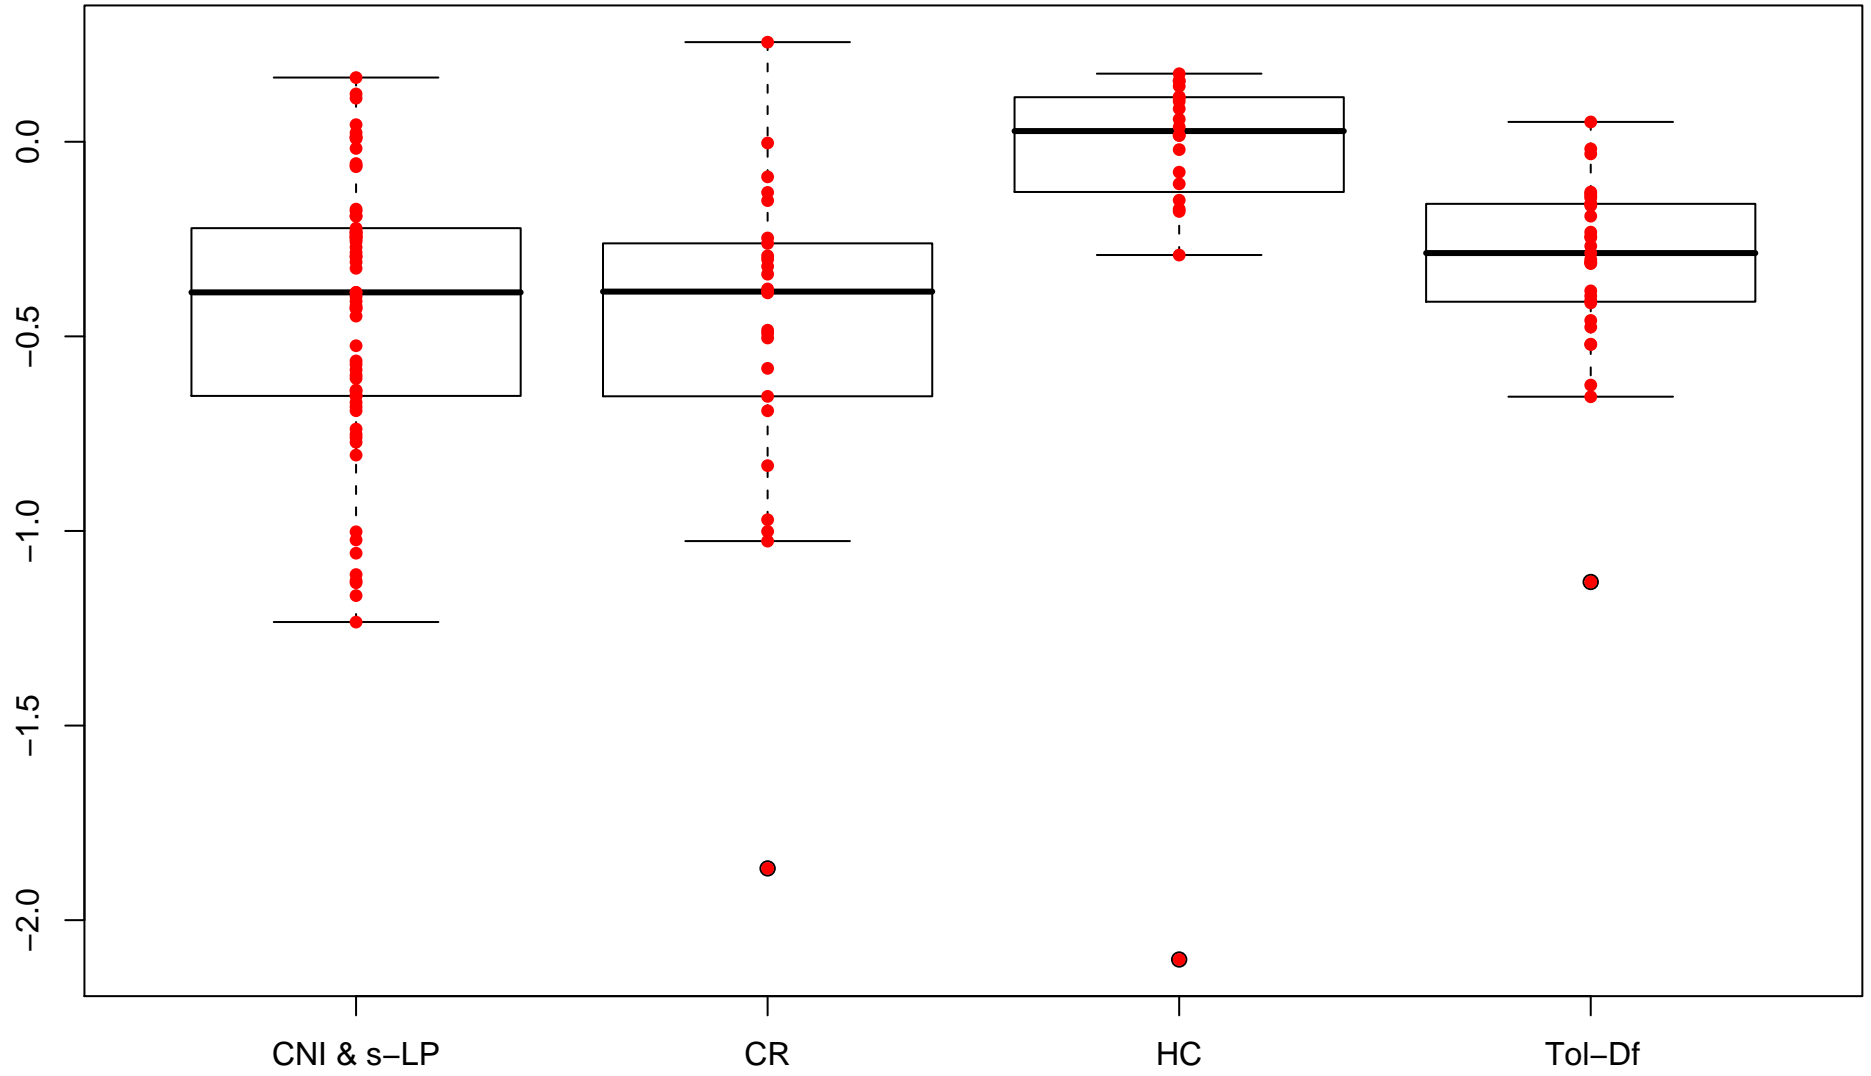

Rank 149 : TCF7

2.3908e-06

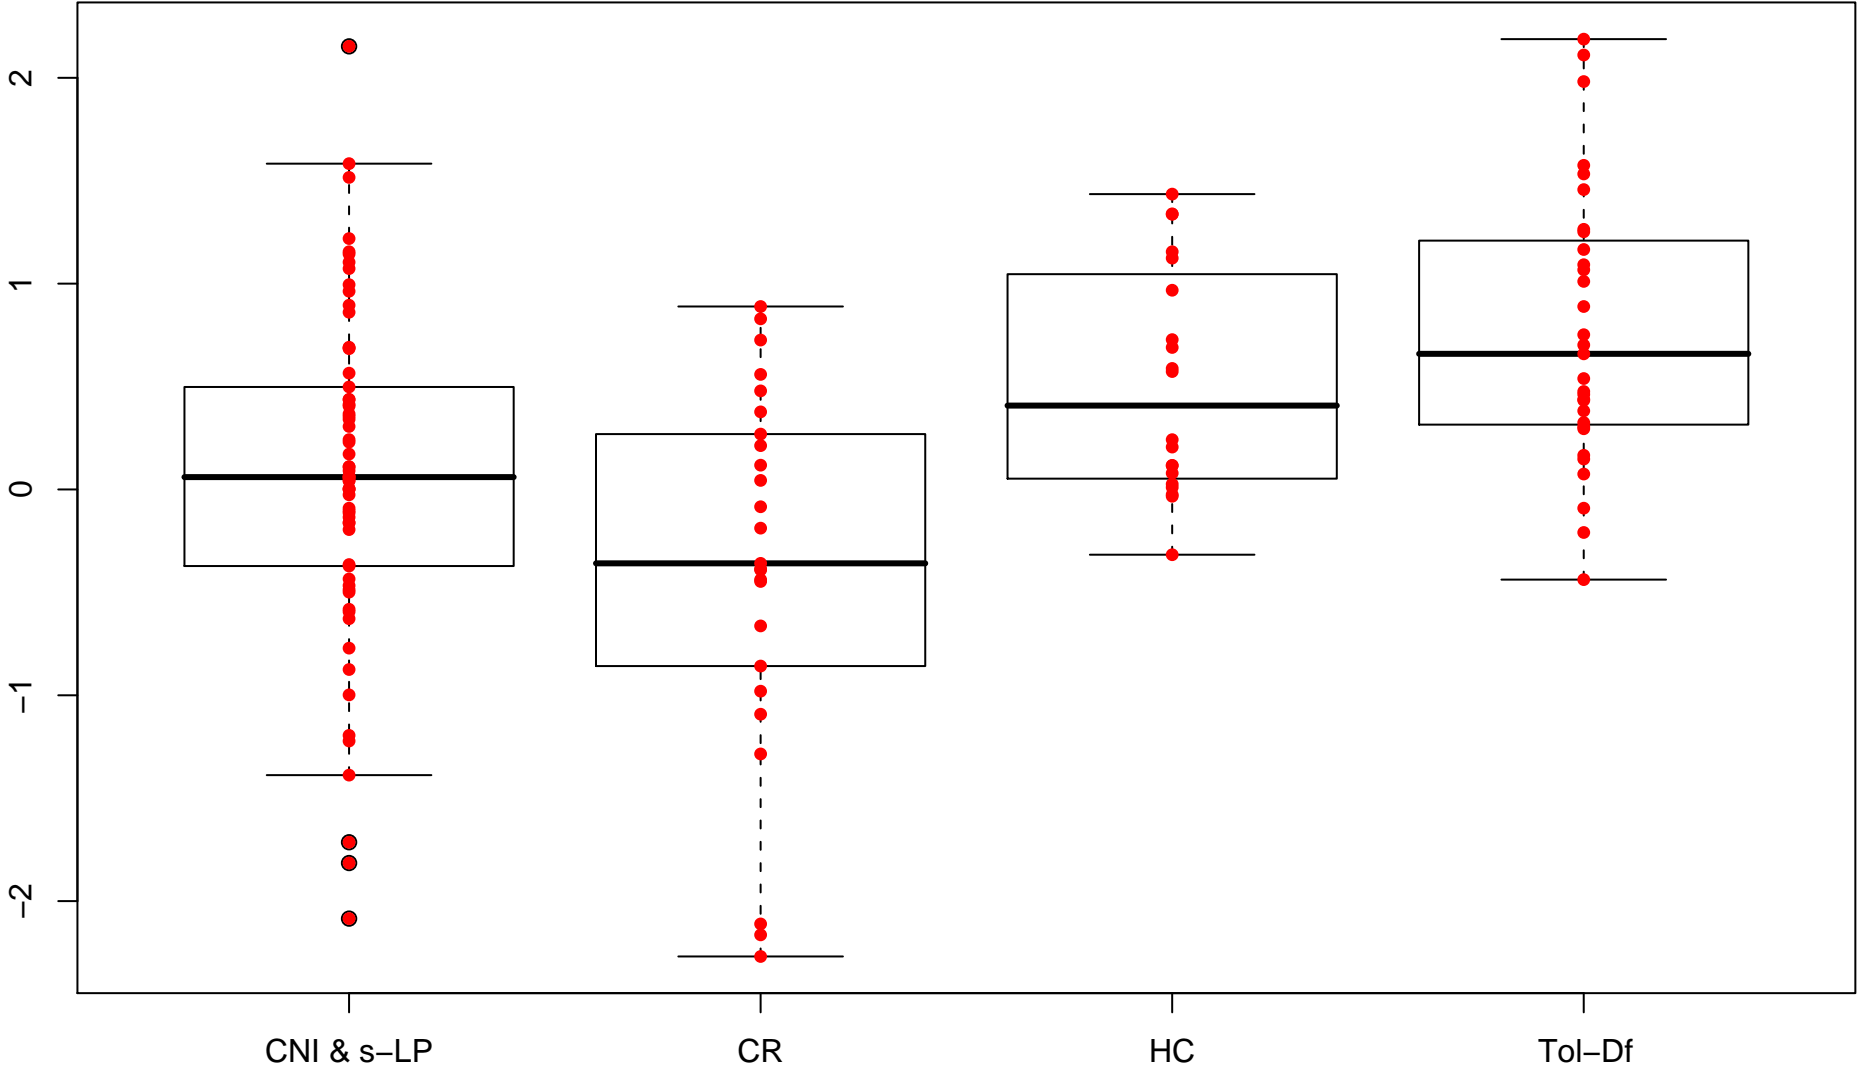

Rank 150 : HLX  
2.5741e-06

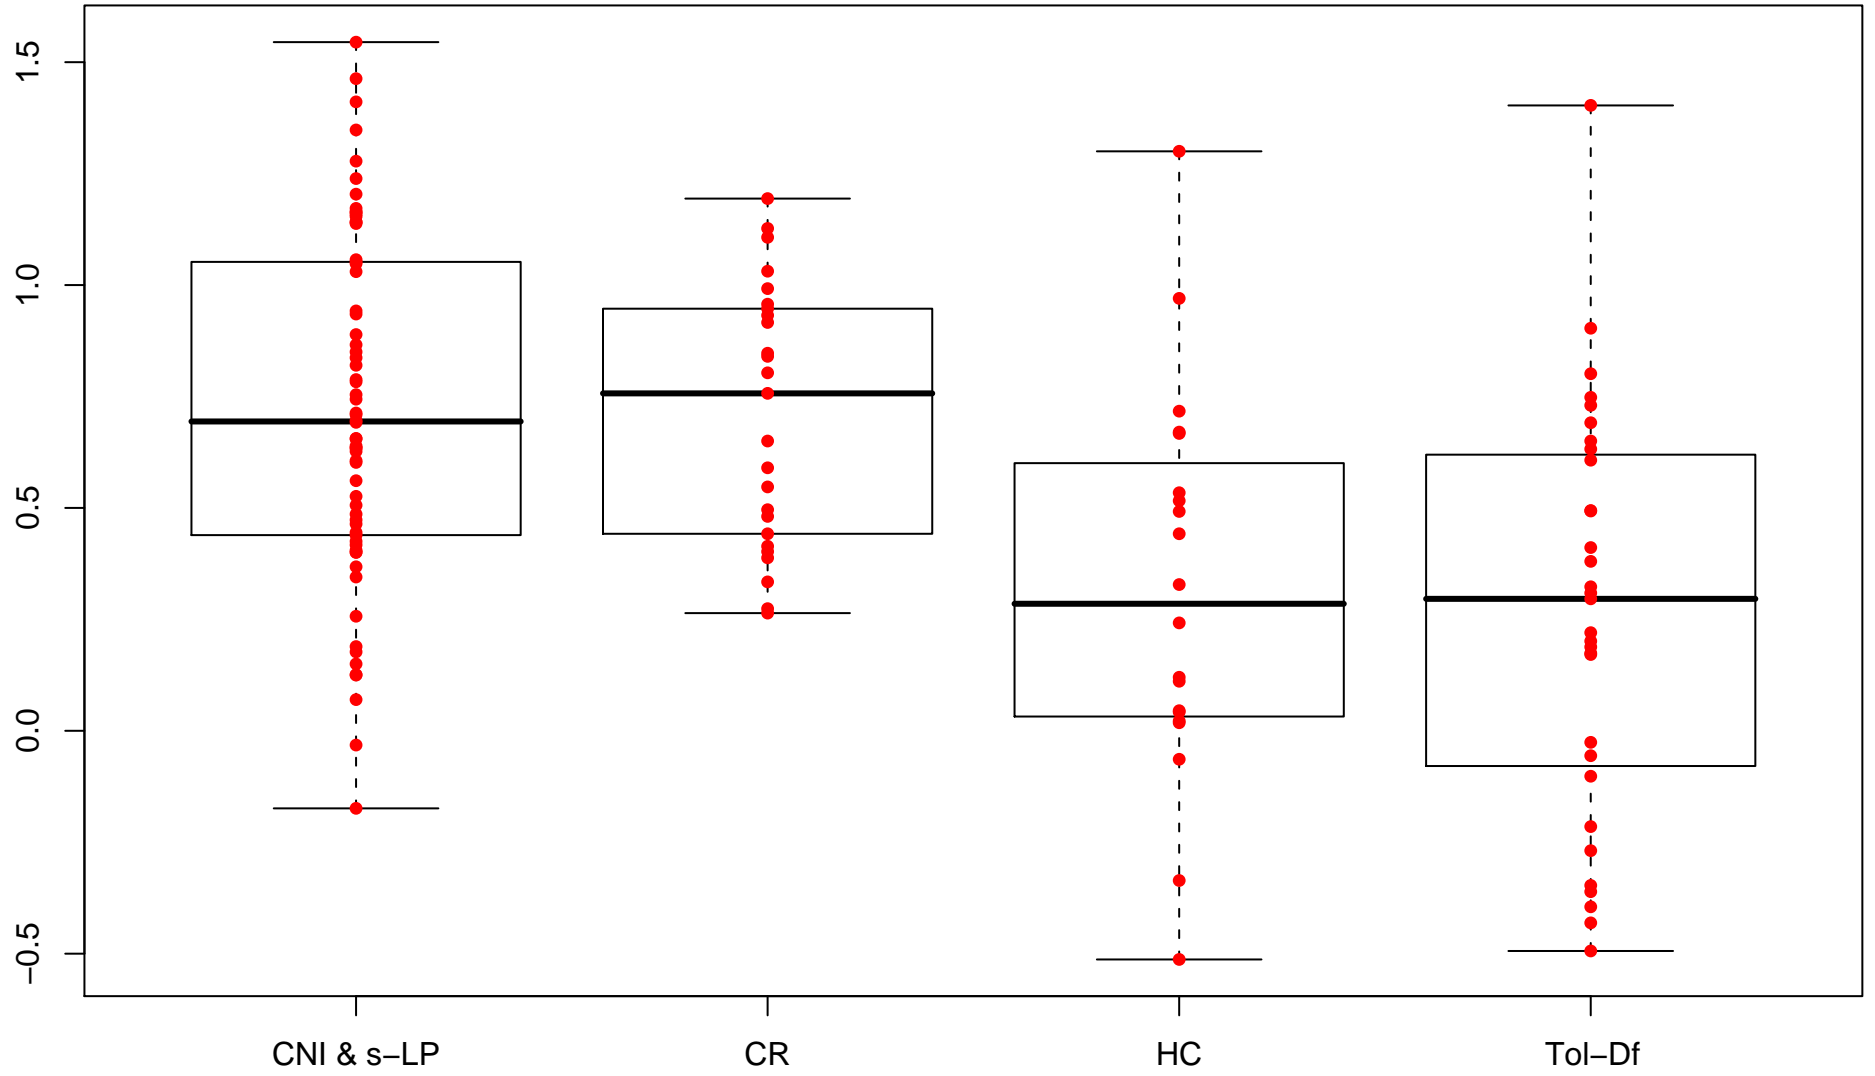

Rank 151 : EGR1  
2.6123e-06

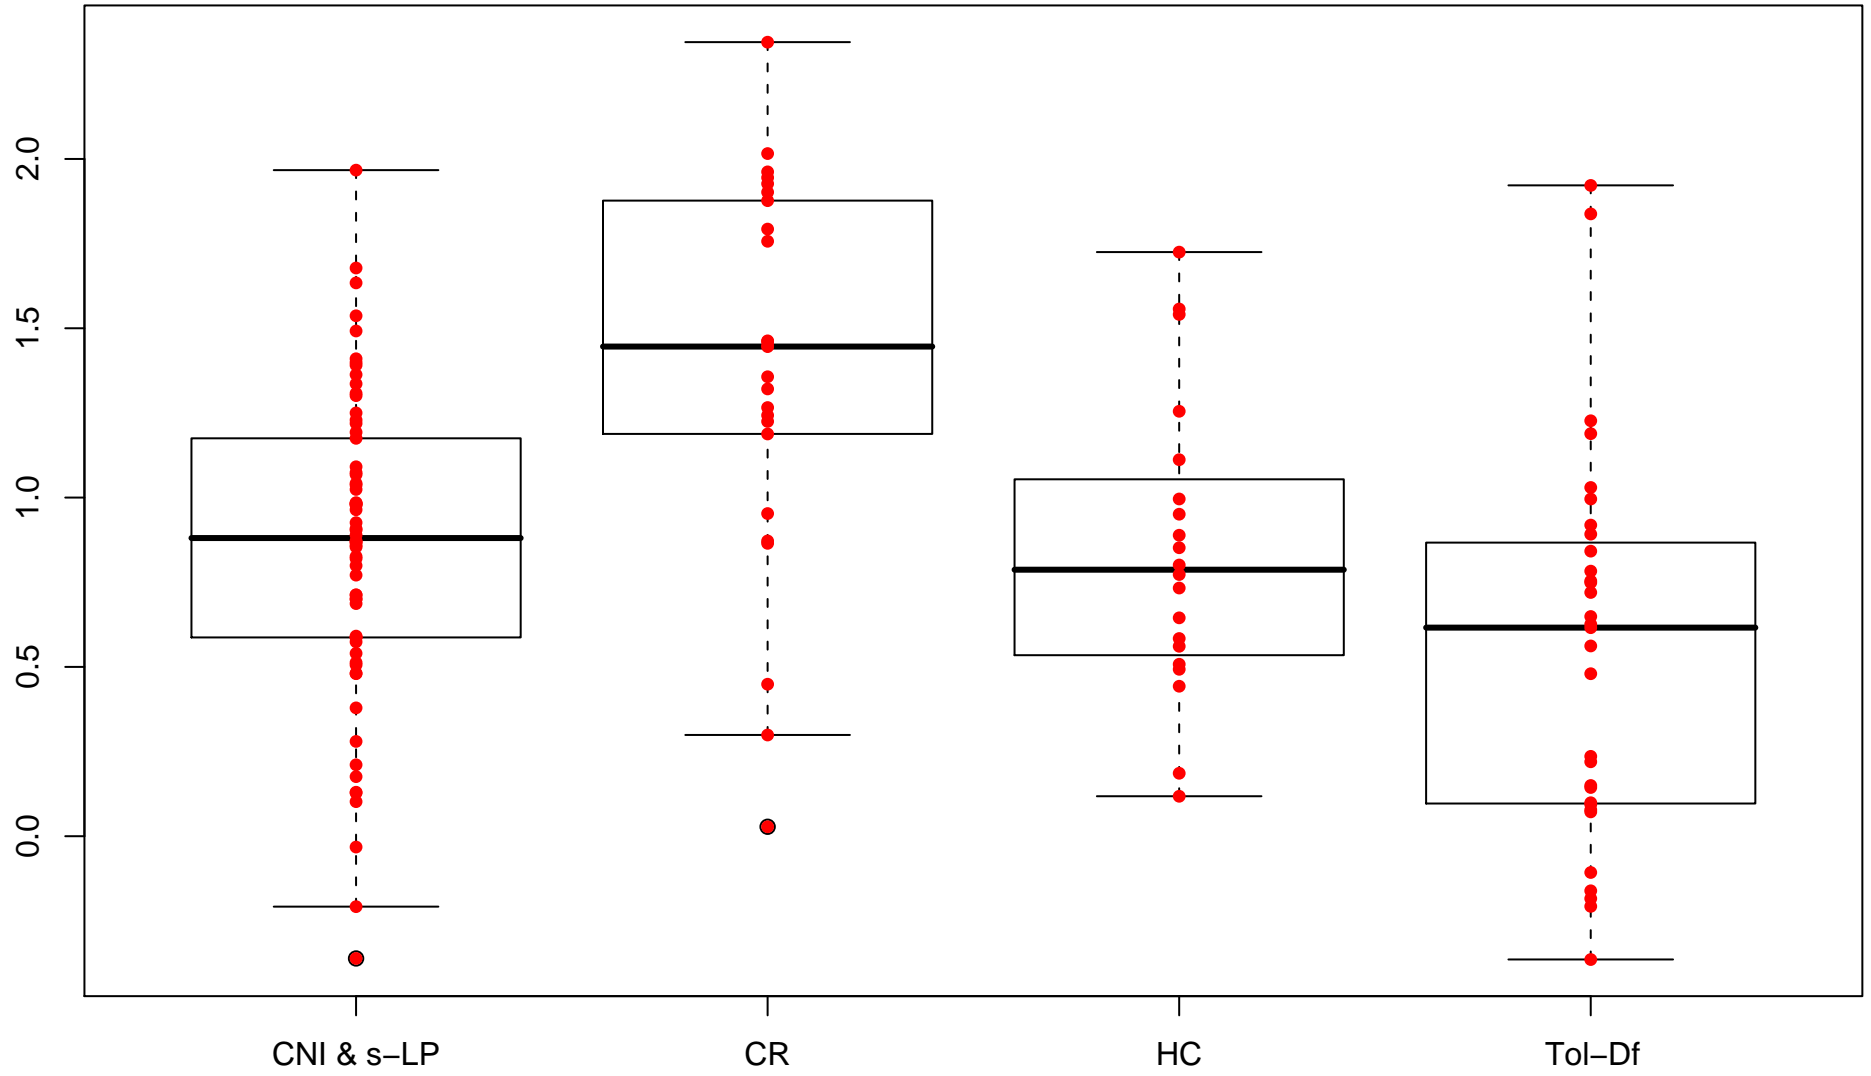



Rank 152 : IL23A  
2.6536e-06

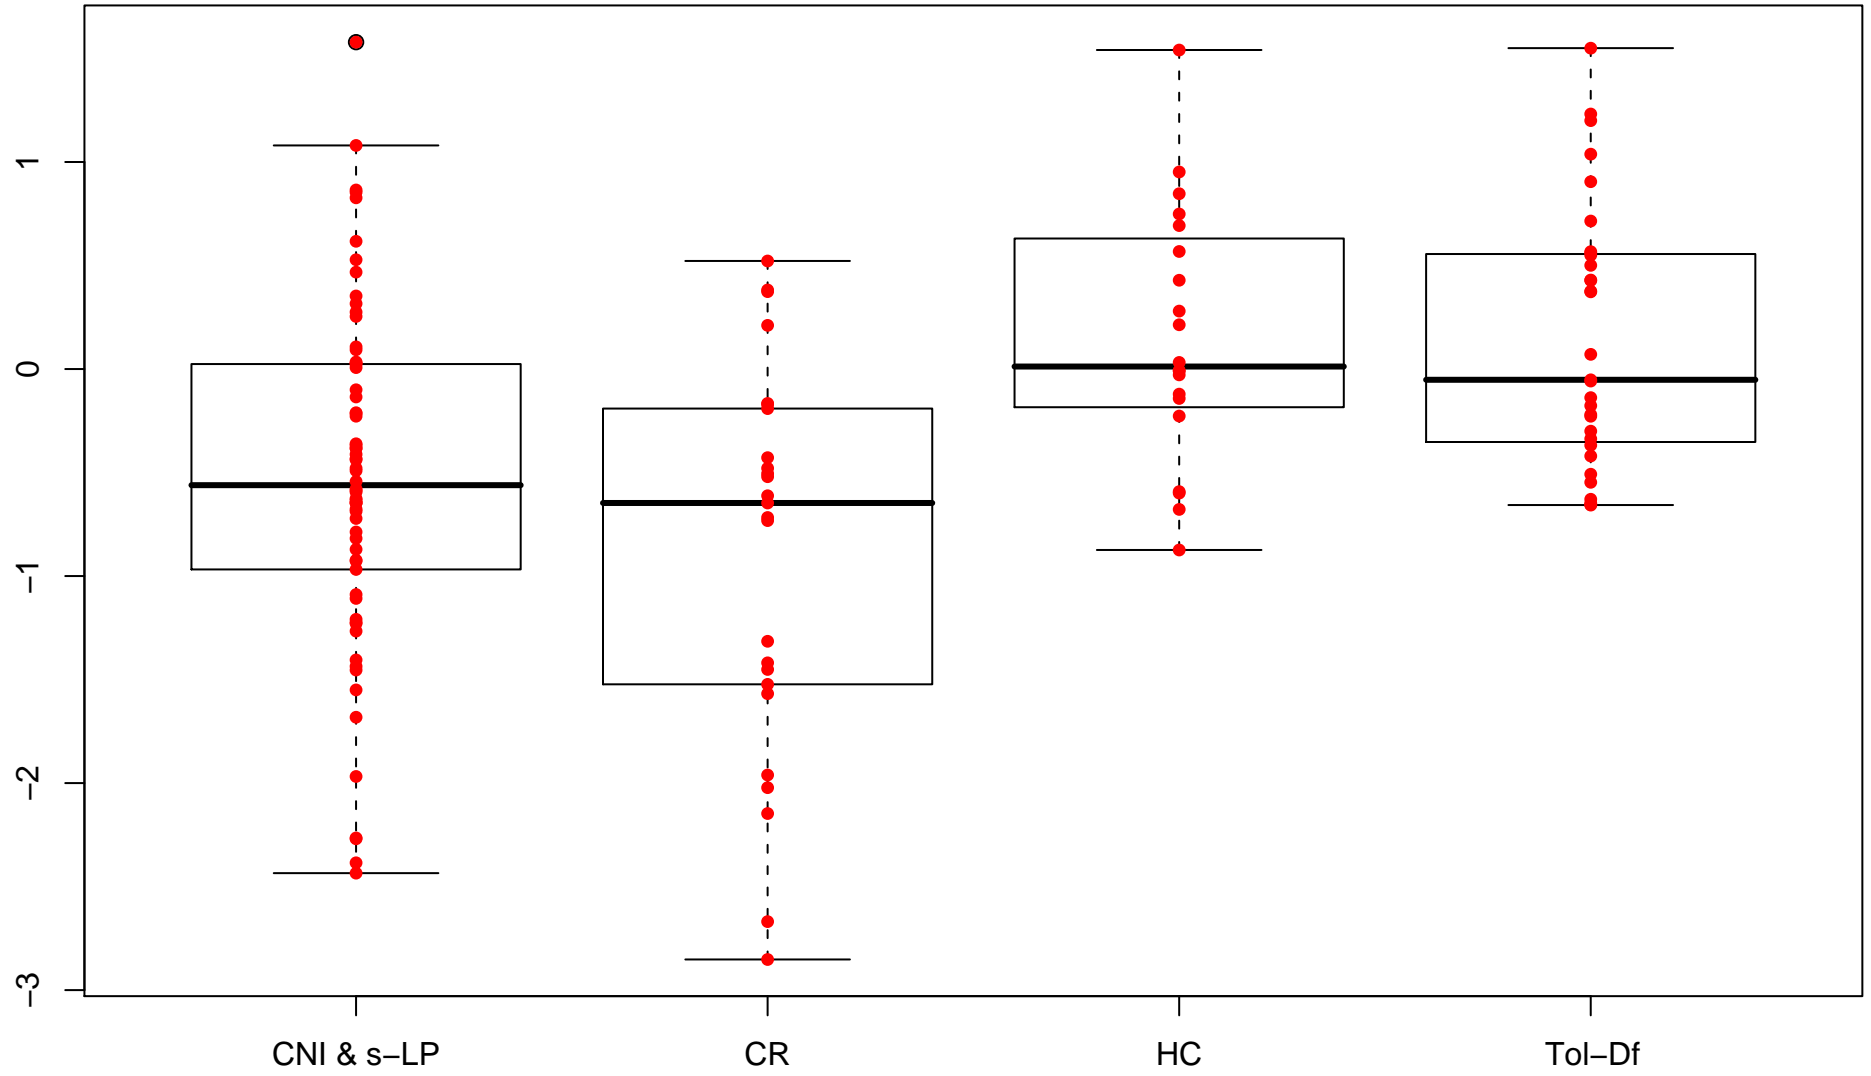

Rank 153 : AF471475

2.8731e-06

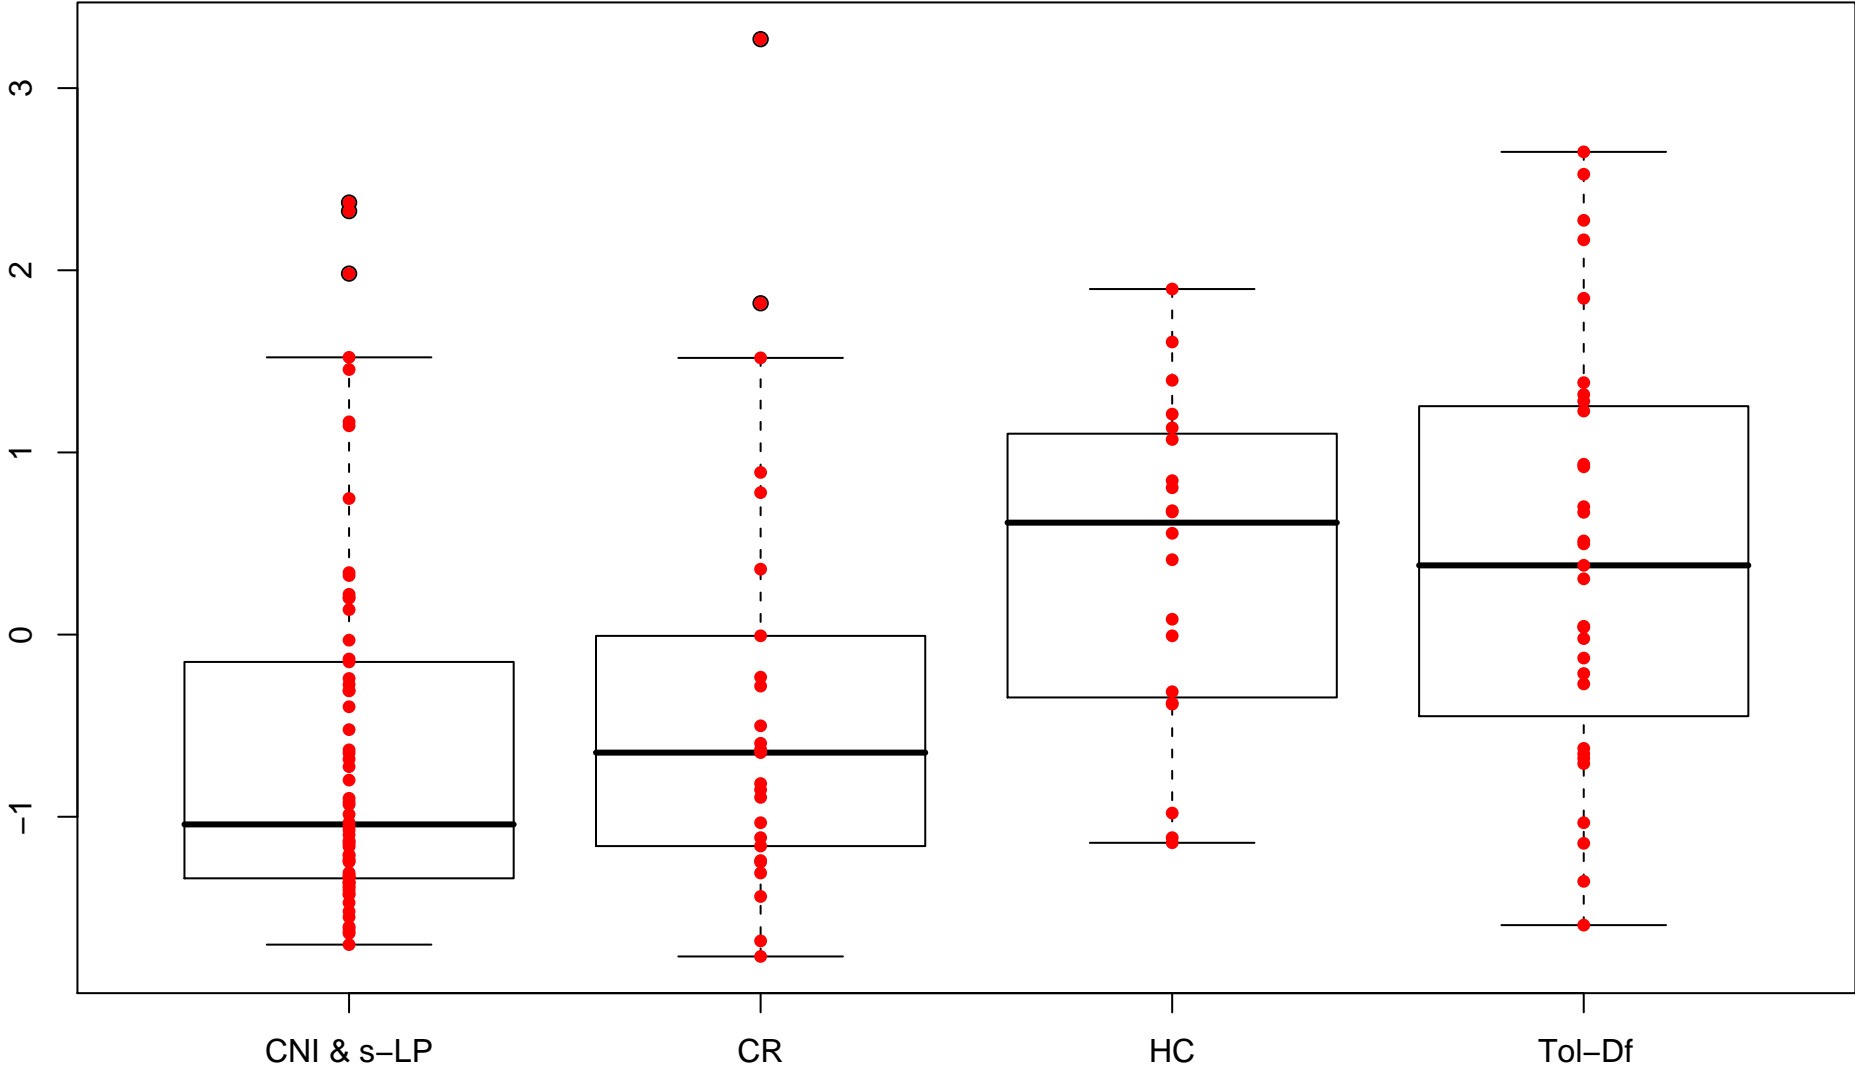

Rank 154 : CCR4  
2.9108e-06

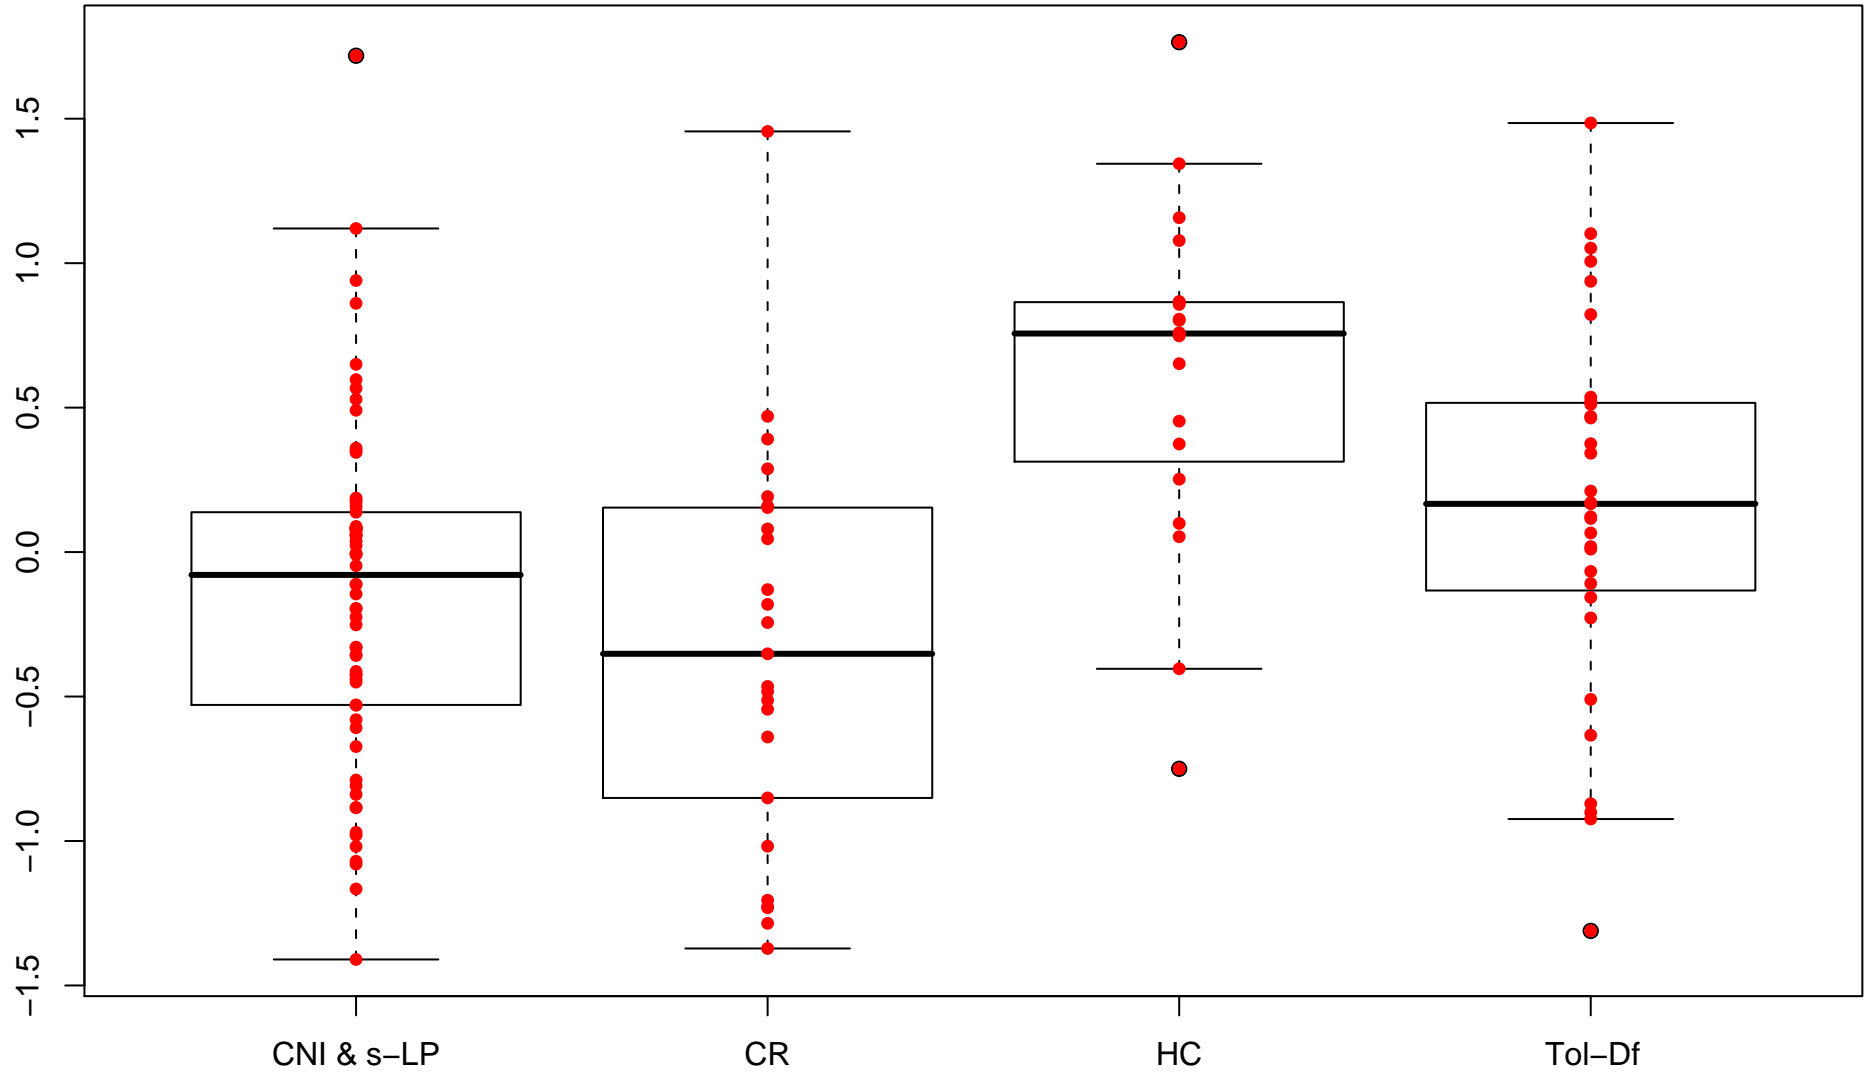

Rank 155 : HNRPH1  
2.9401e-06

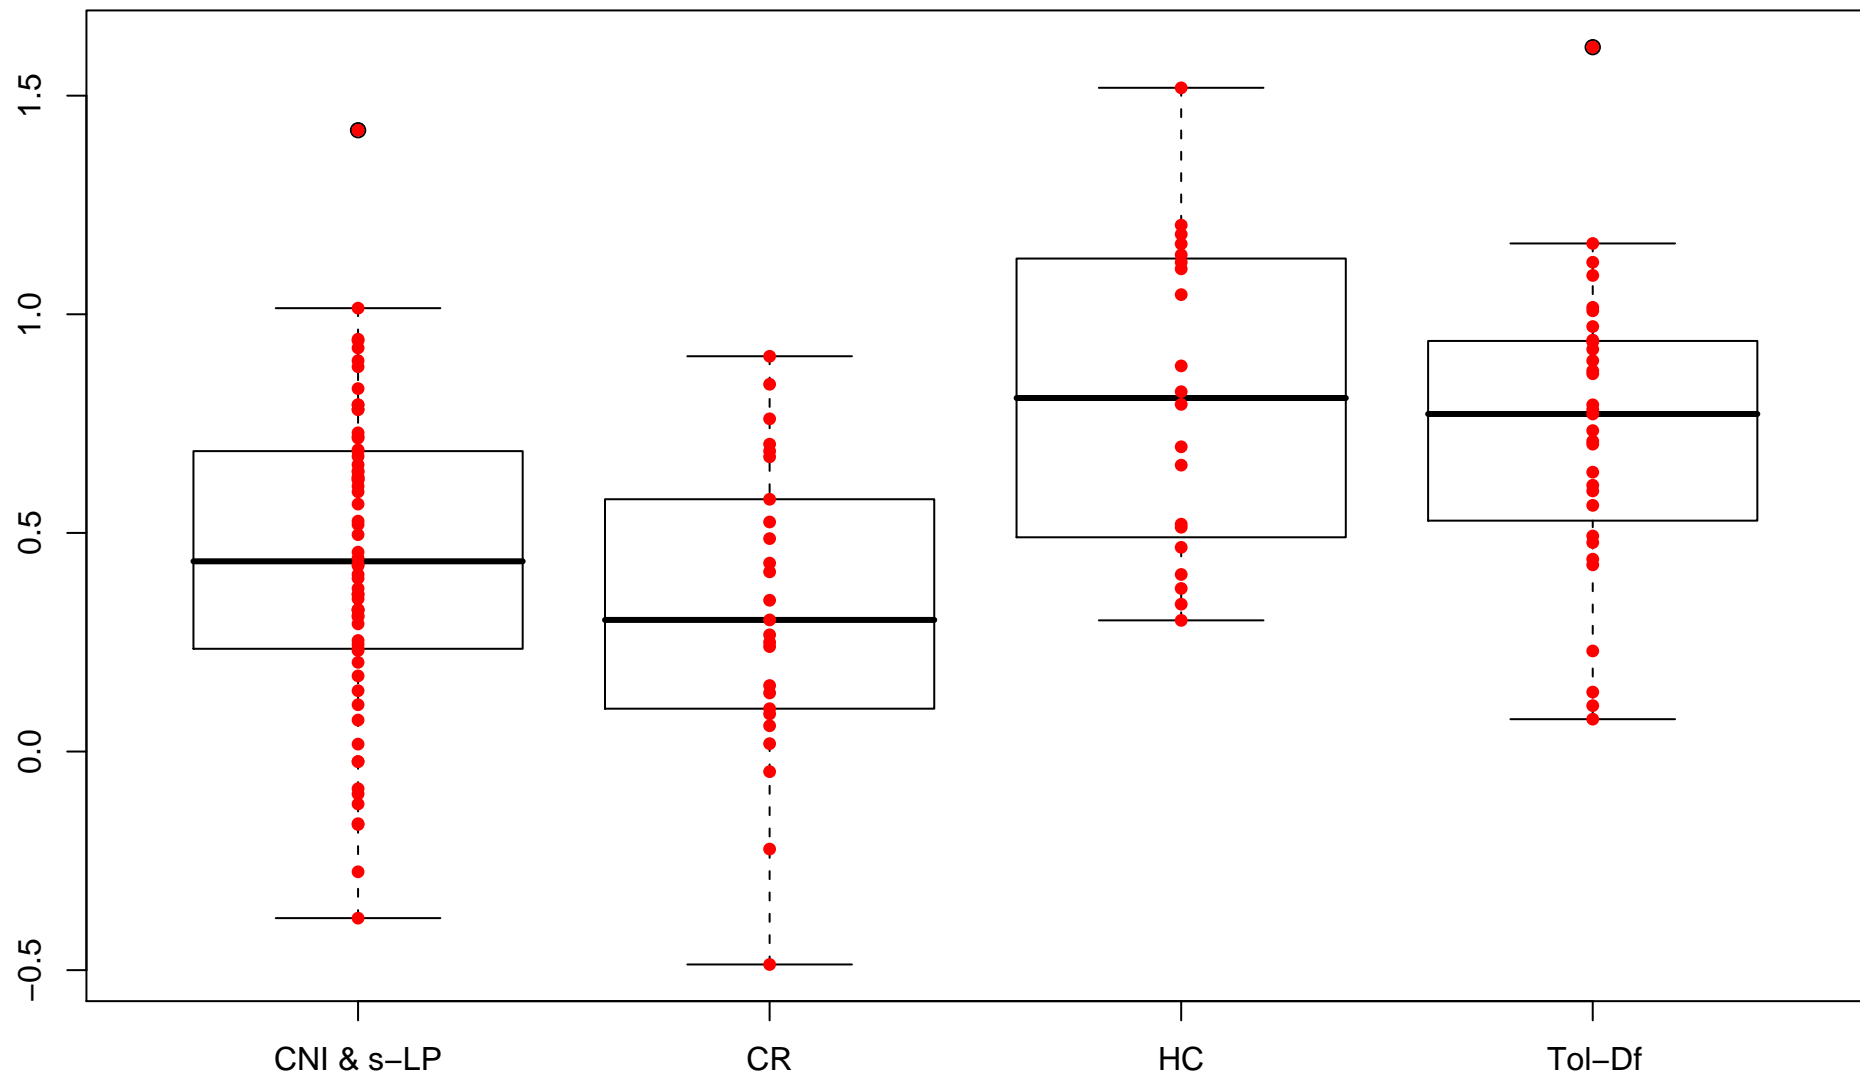

Rank 156 : HCG\_1984468;LOC388524;RPSA  
3.0663e-06

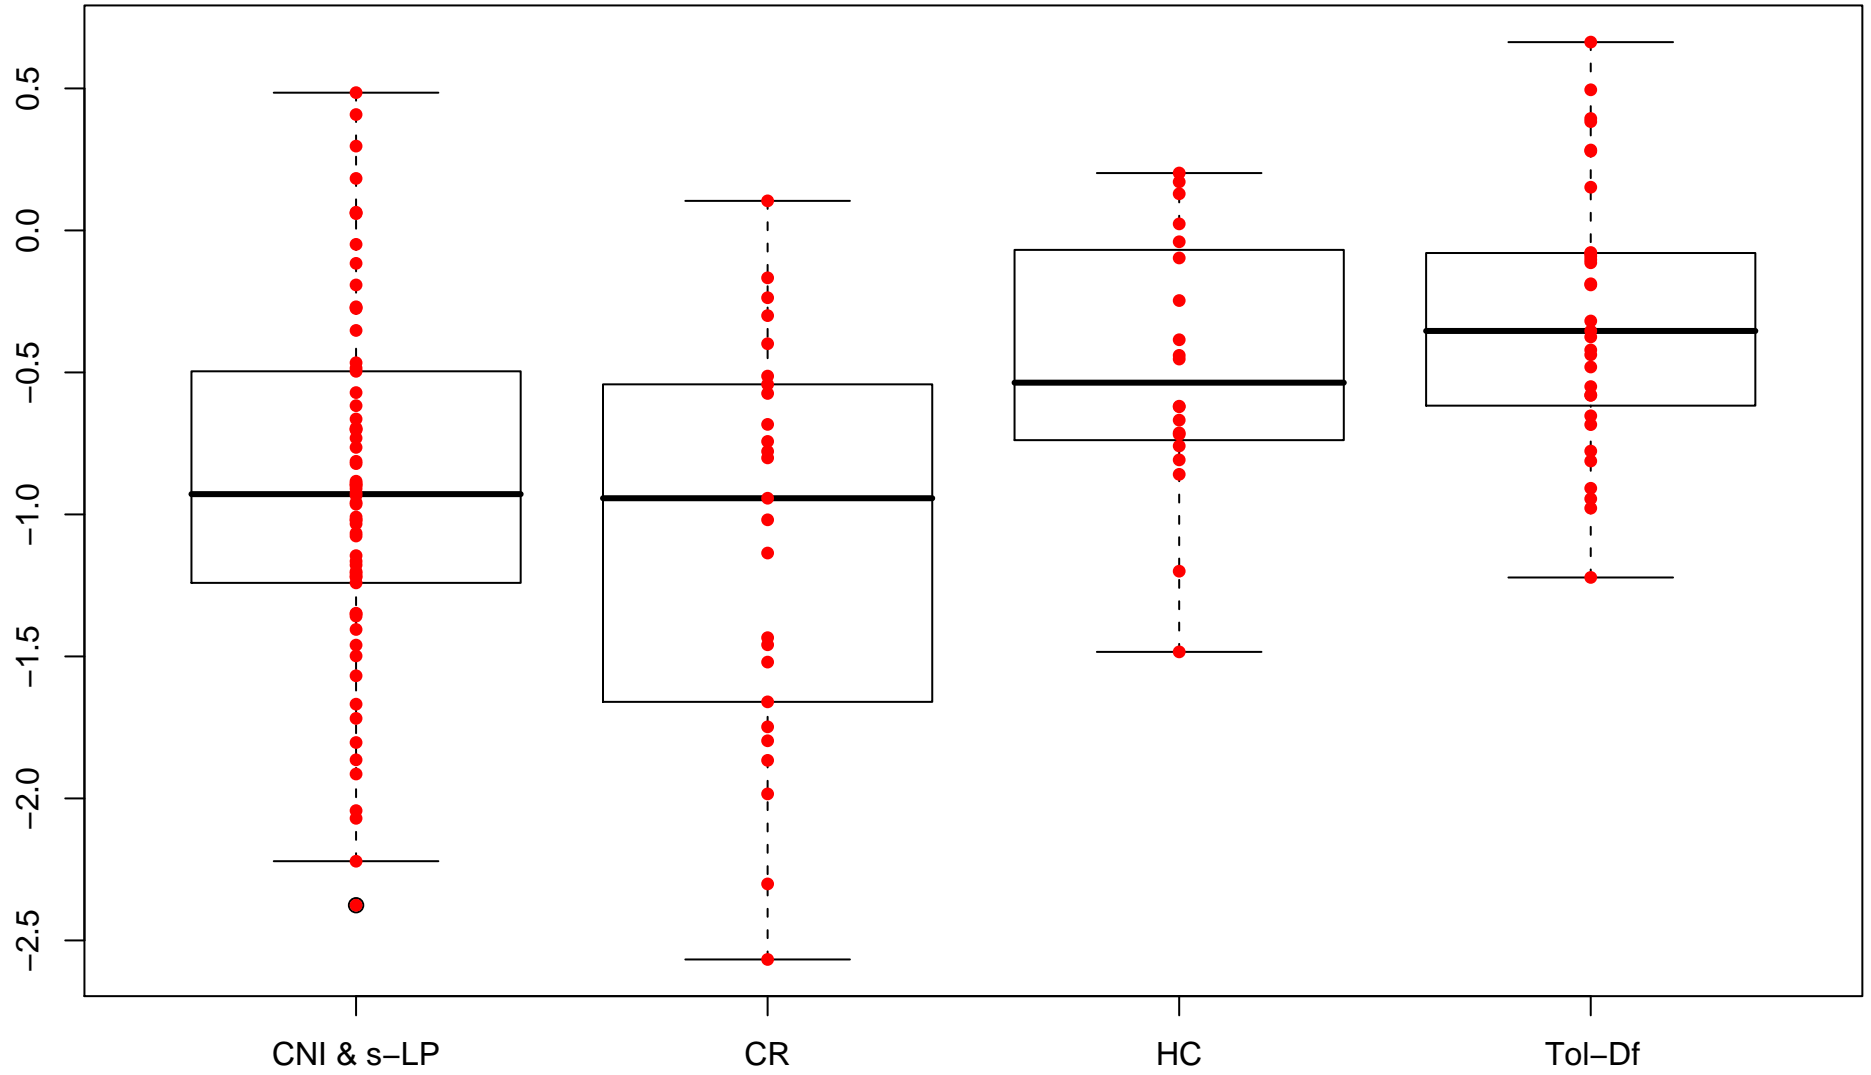

Rank 157 : MT1E  
3.192e-06

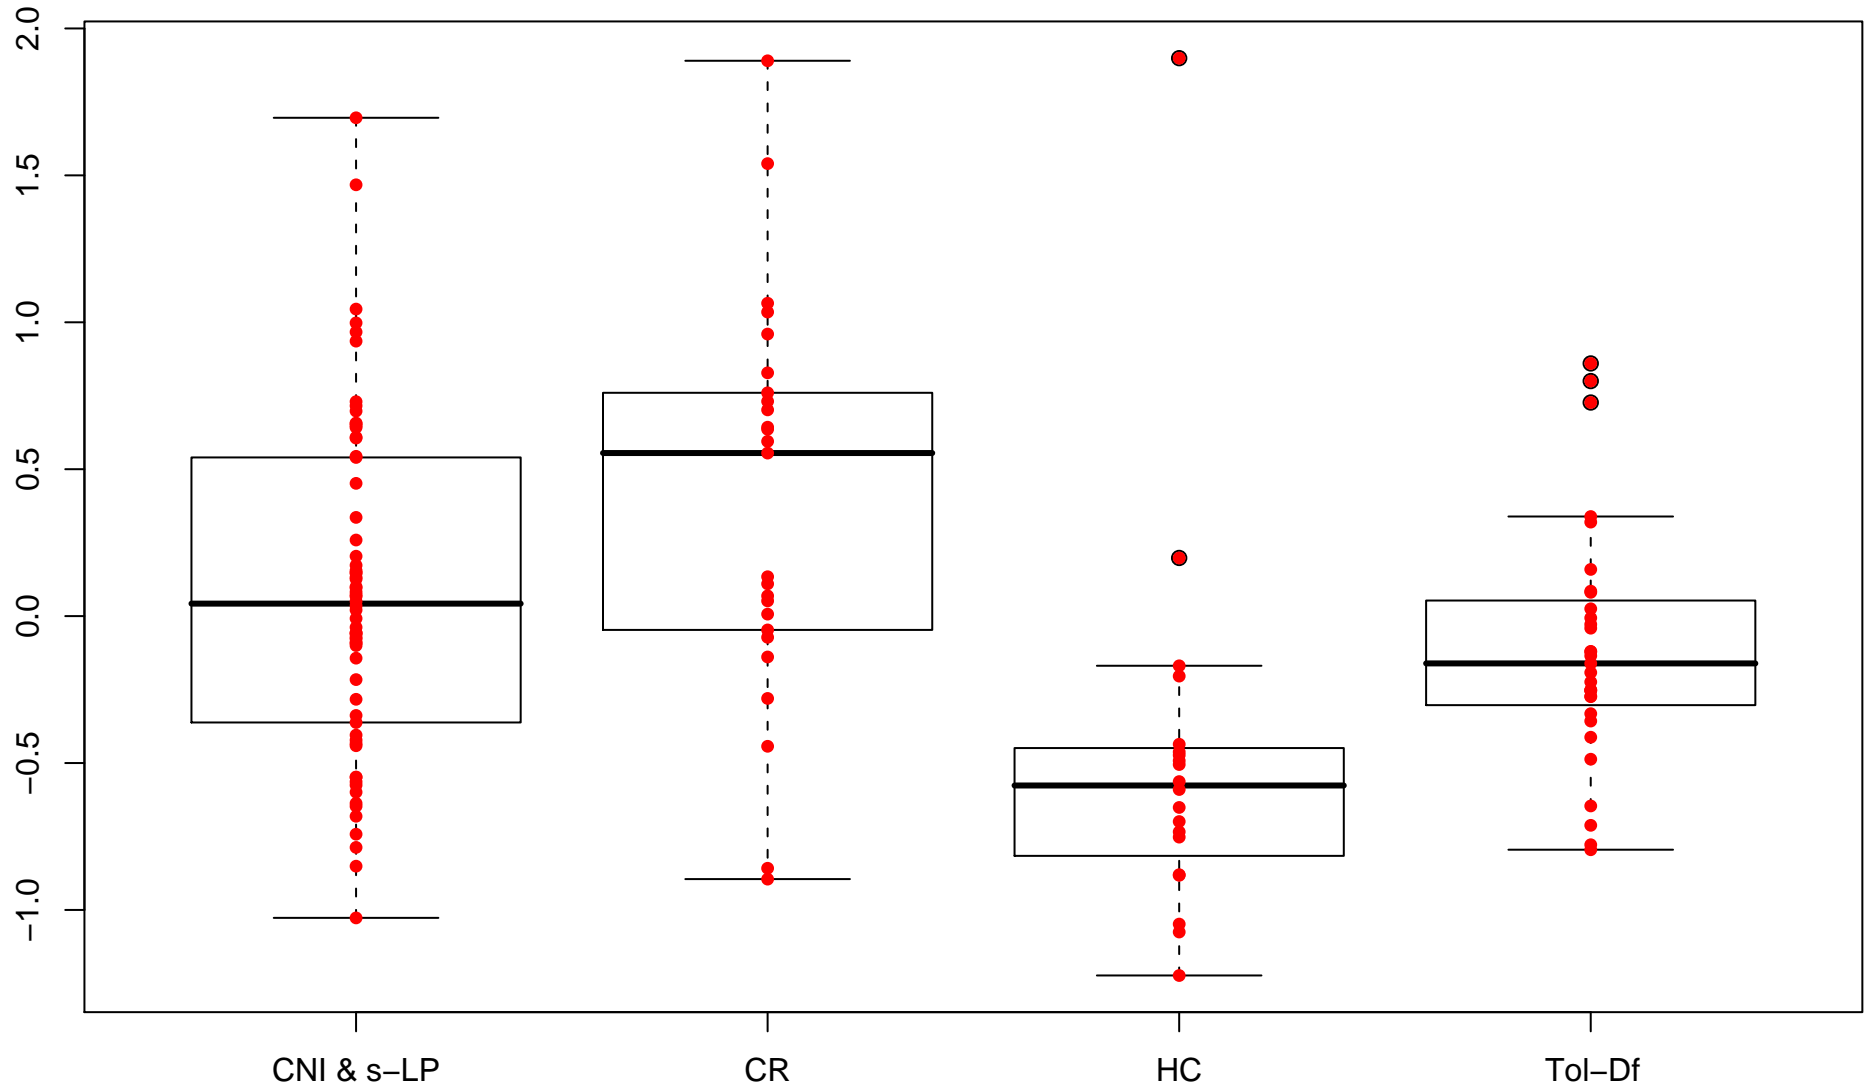

Rank 158 : CCL23  
3.205e-06

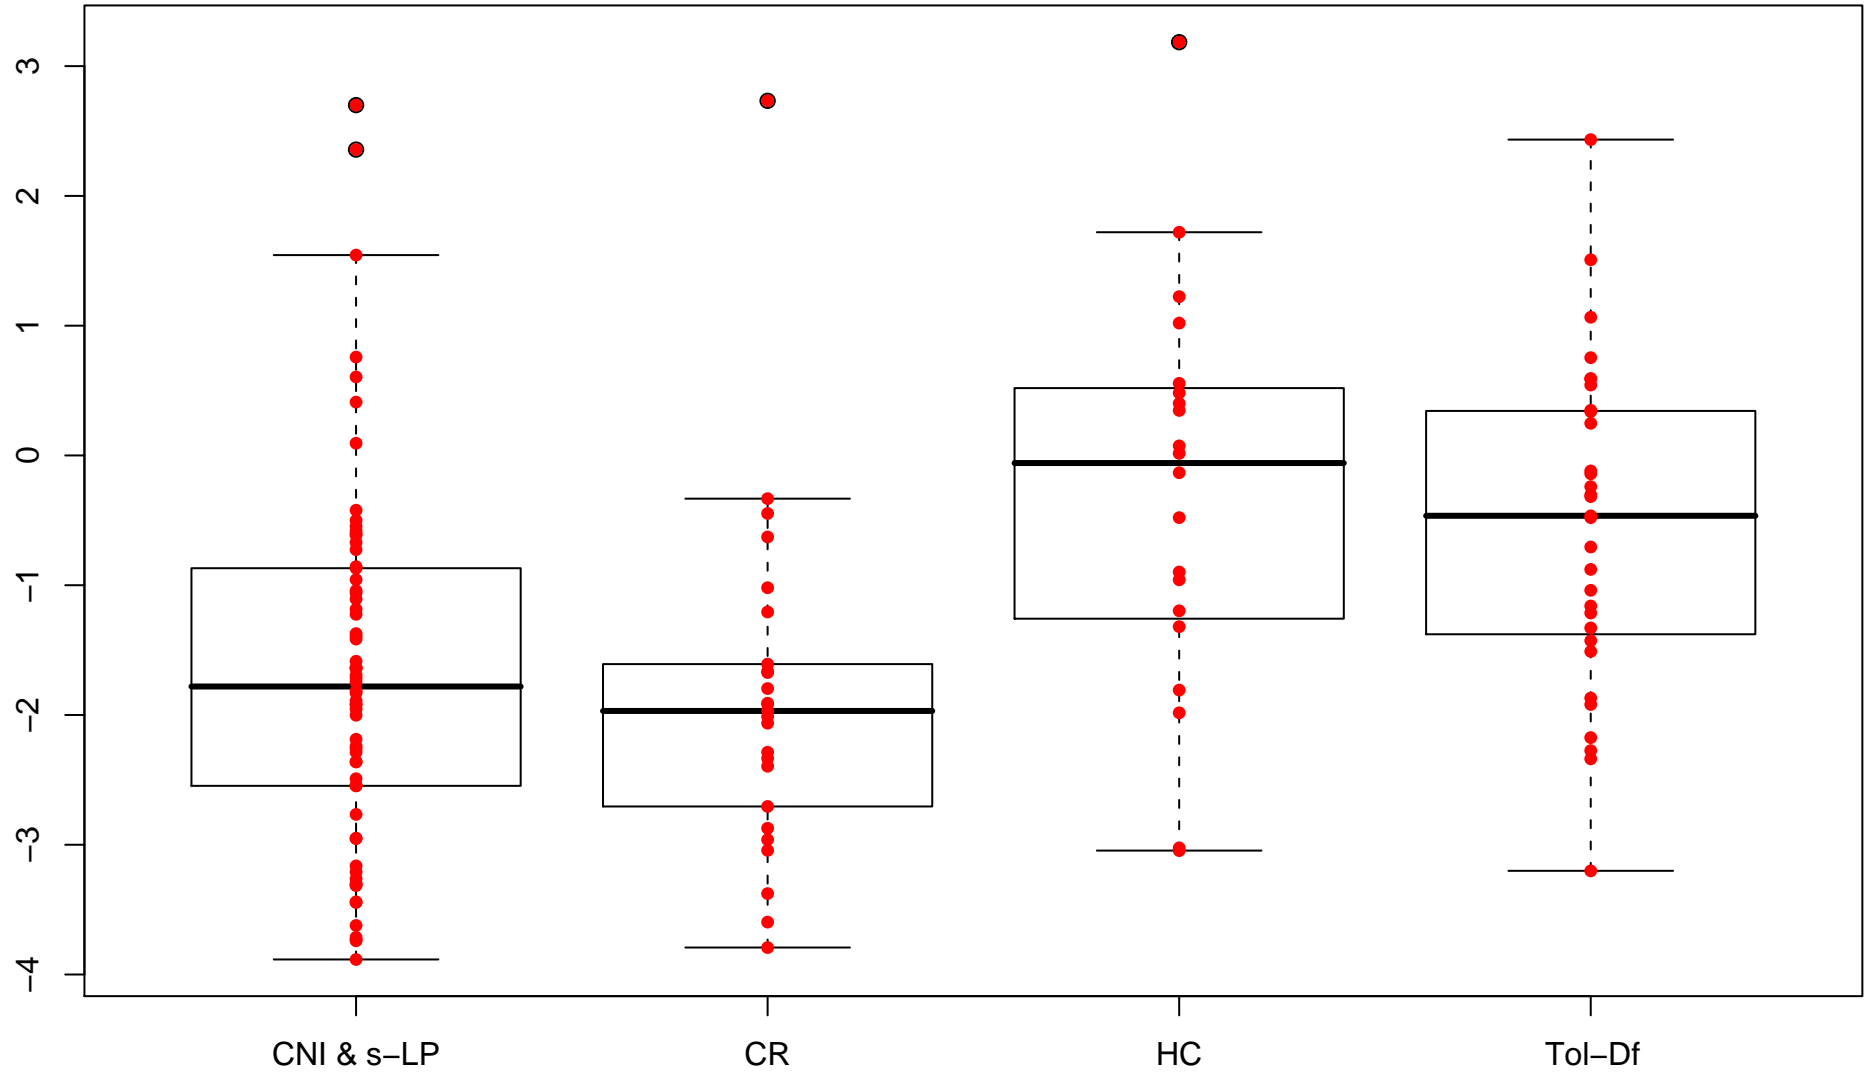

Rank 159 : PSCD1  
3.254e-06

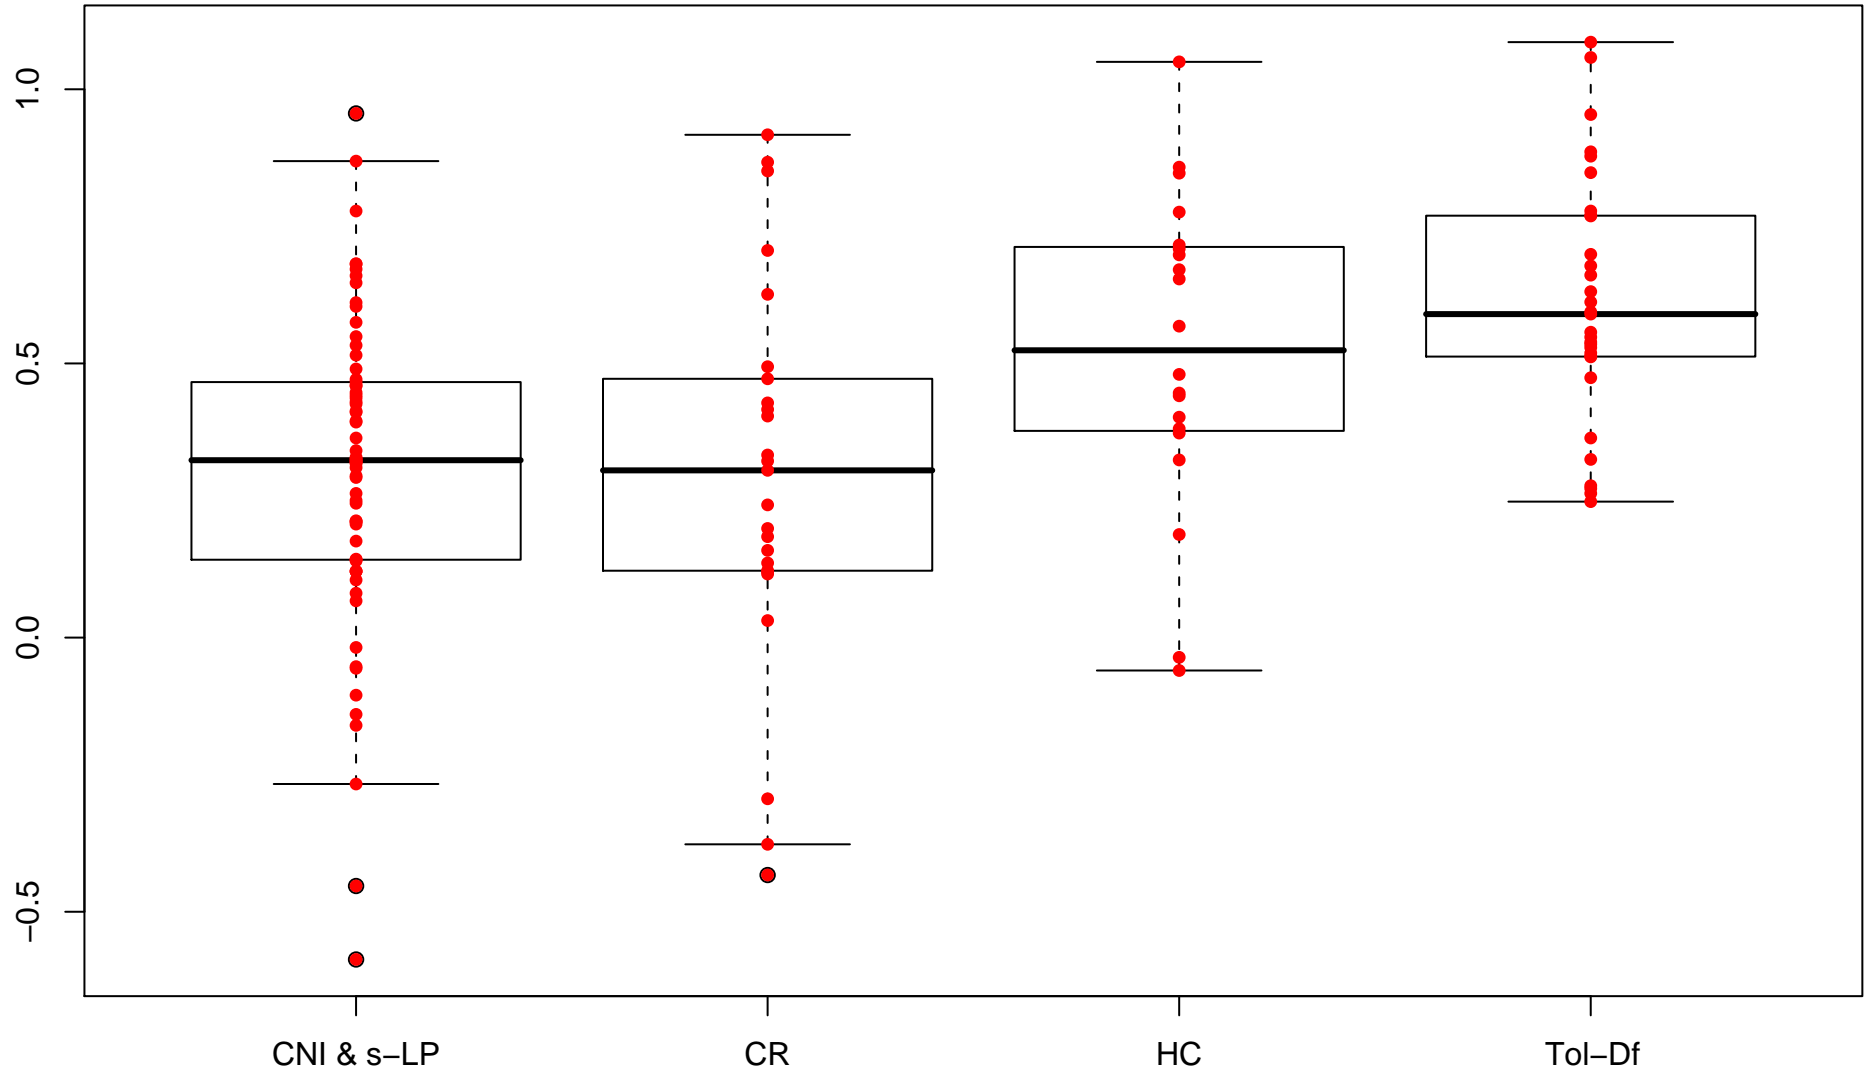



Rank 160 : CTSD  
3.315e-06

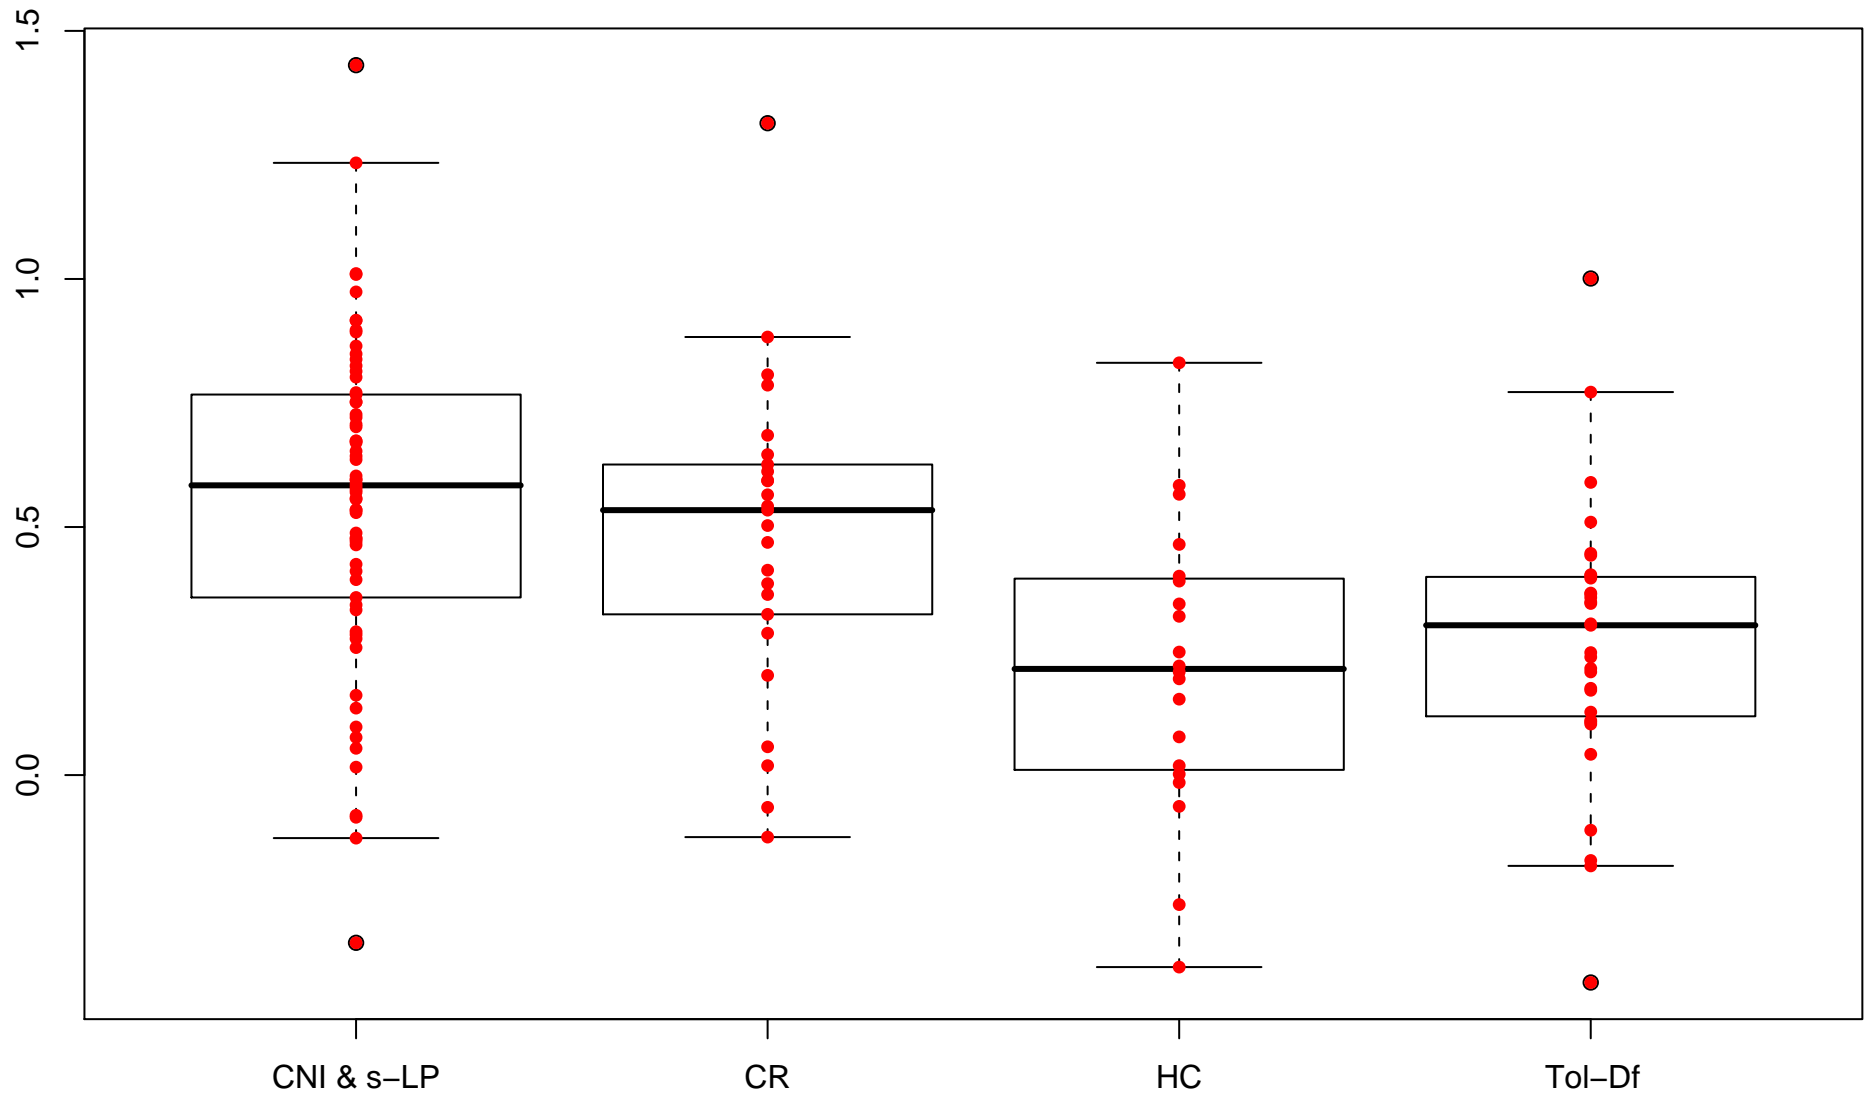

Rank 161 : SLC26A8  
3.348e-06

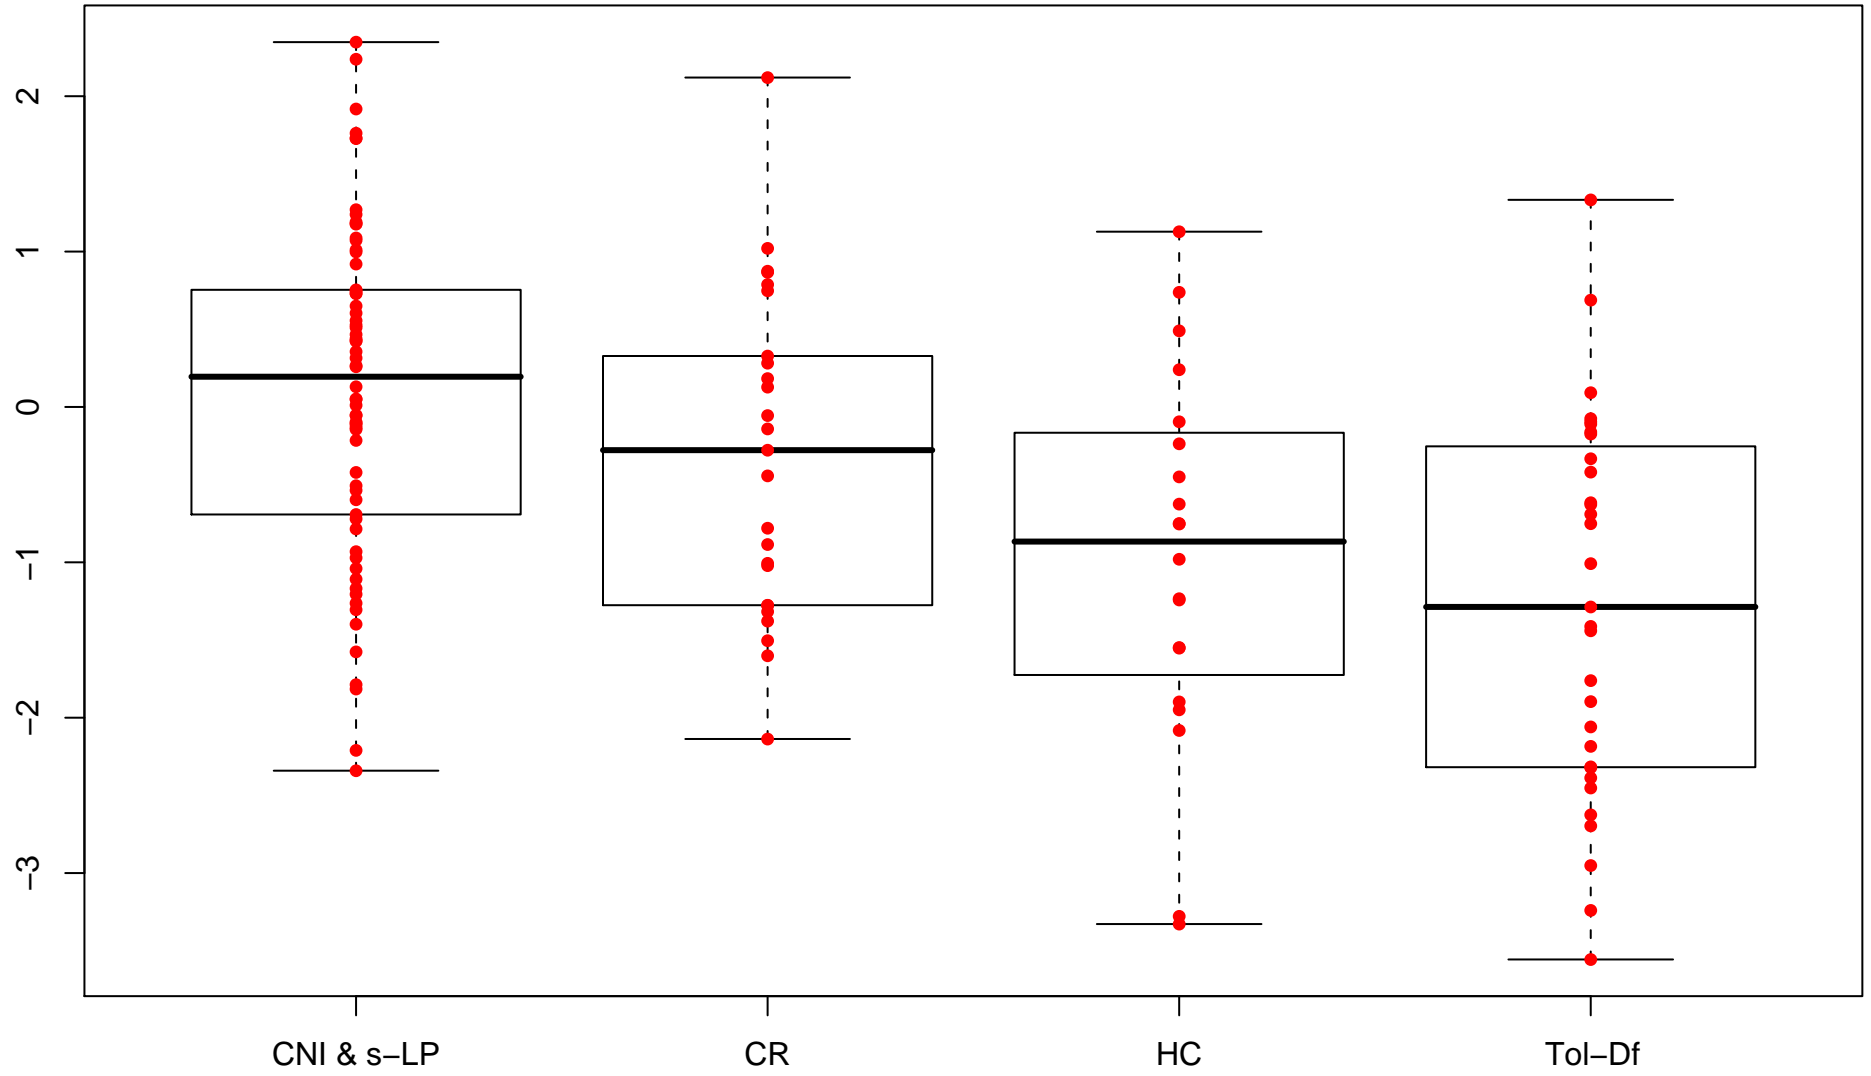

Rank 162 : PDLIM7  
3.385e-06

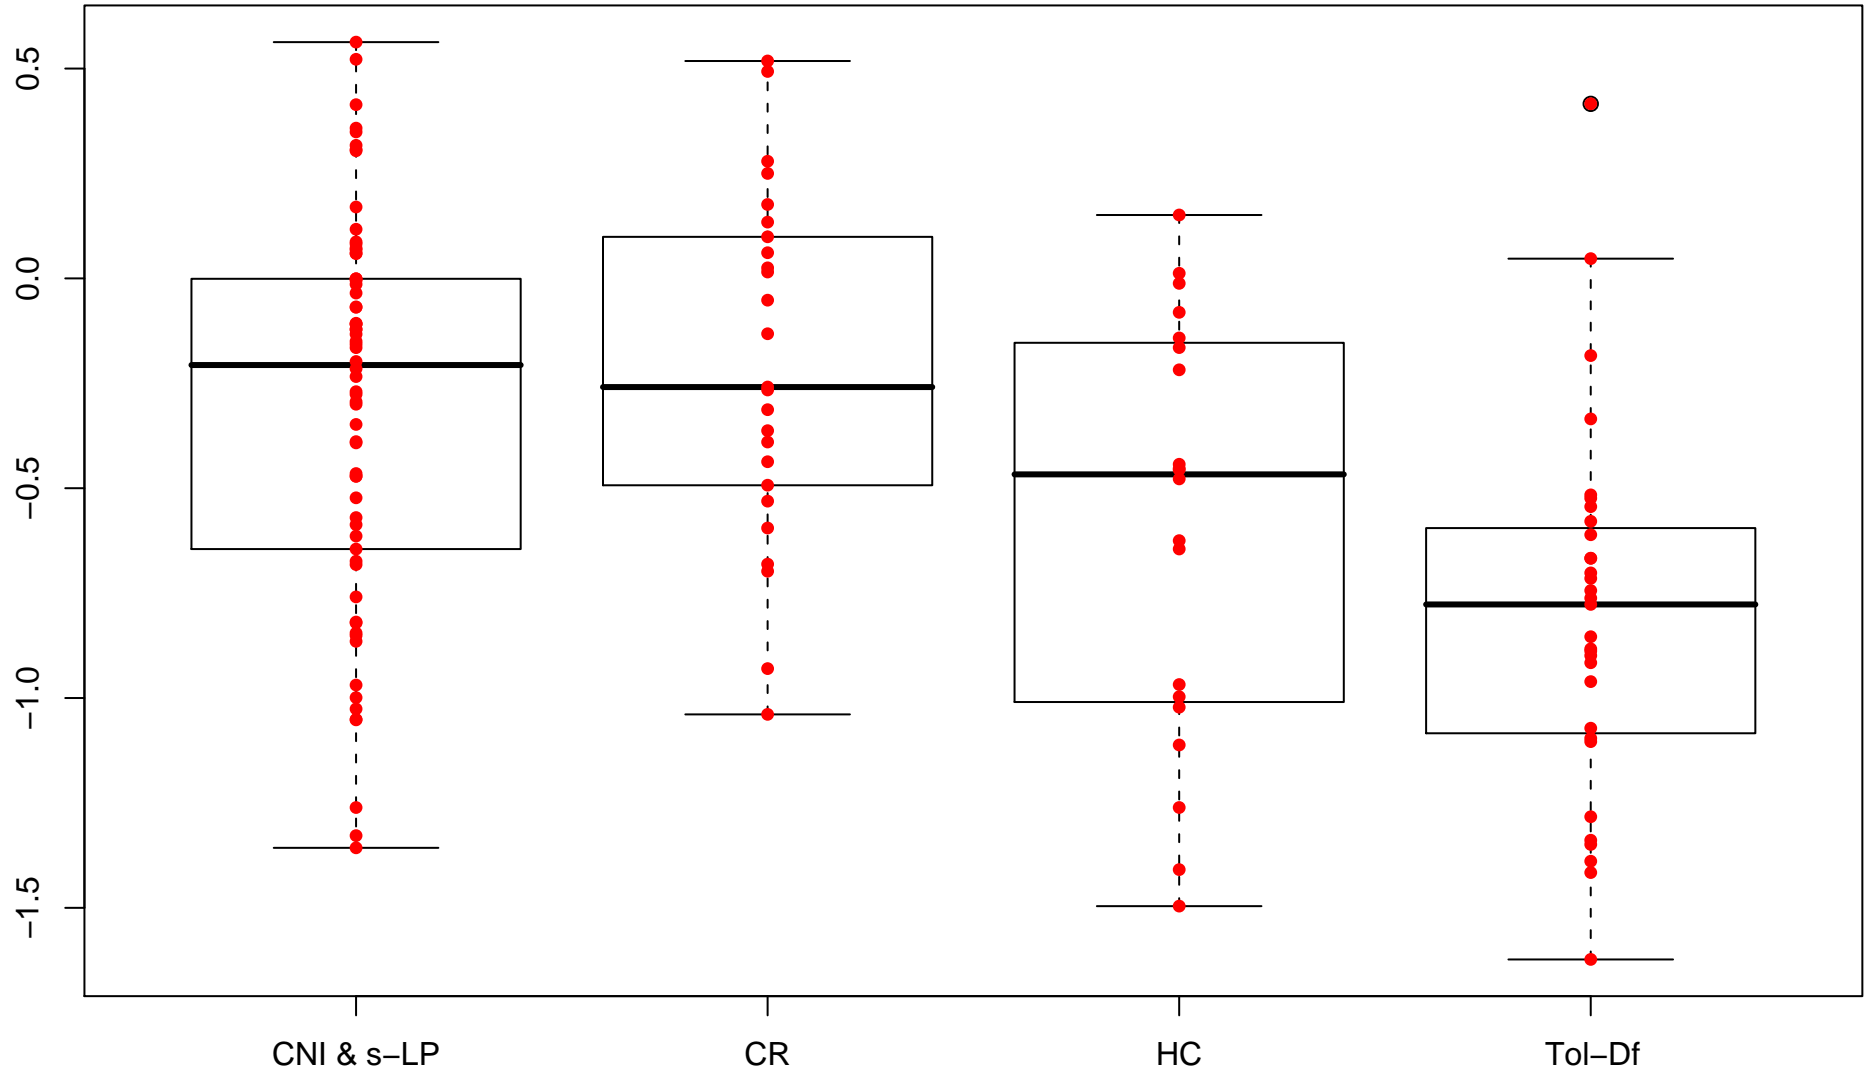

Rank 163 : CASD1  
3.396e-06

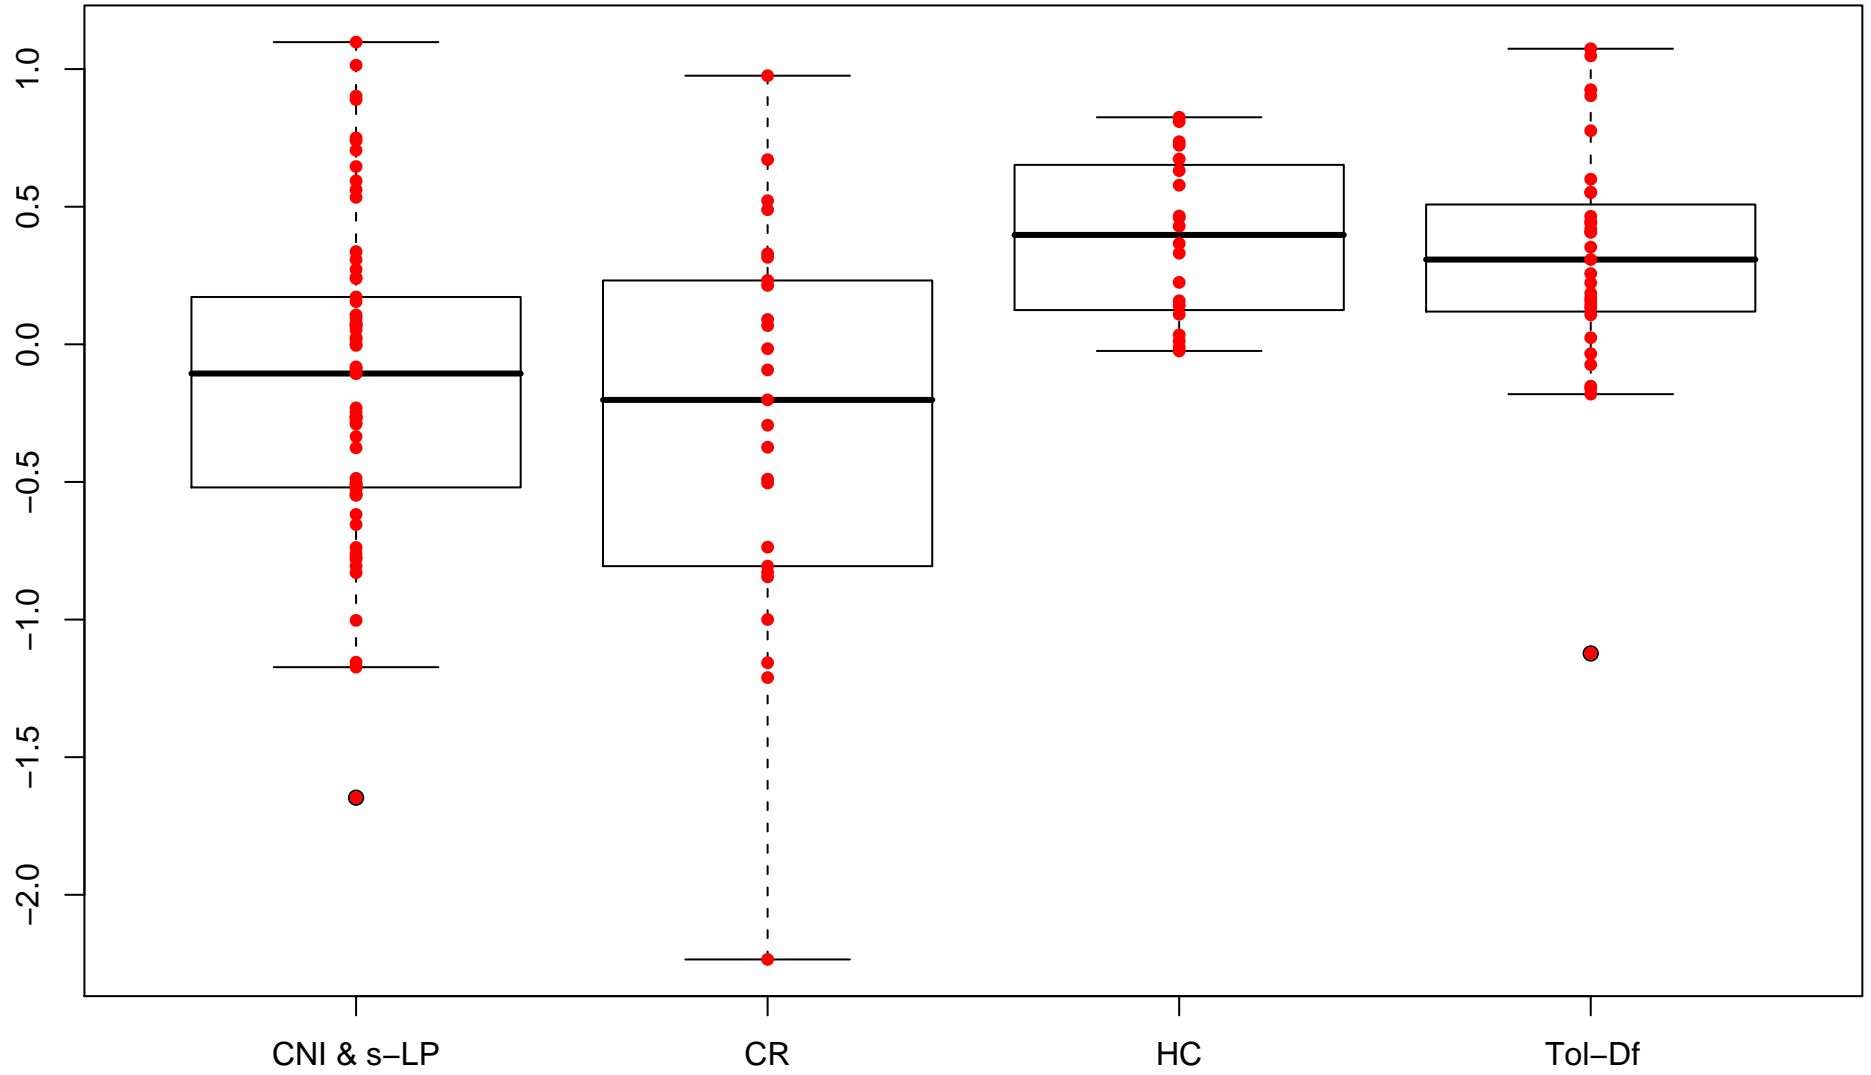

Rank 164 : BEX5  
3.467e-06

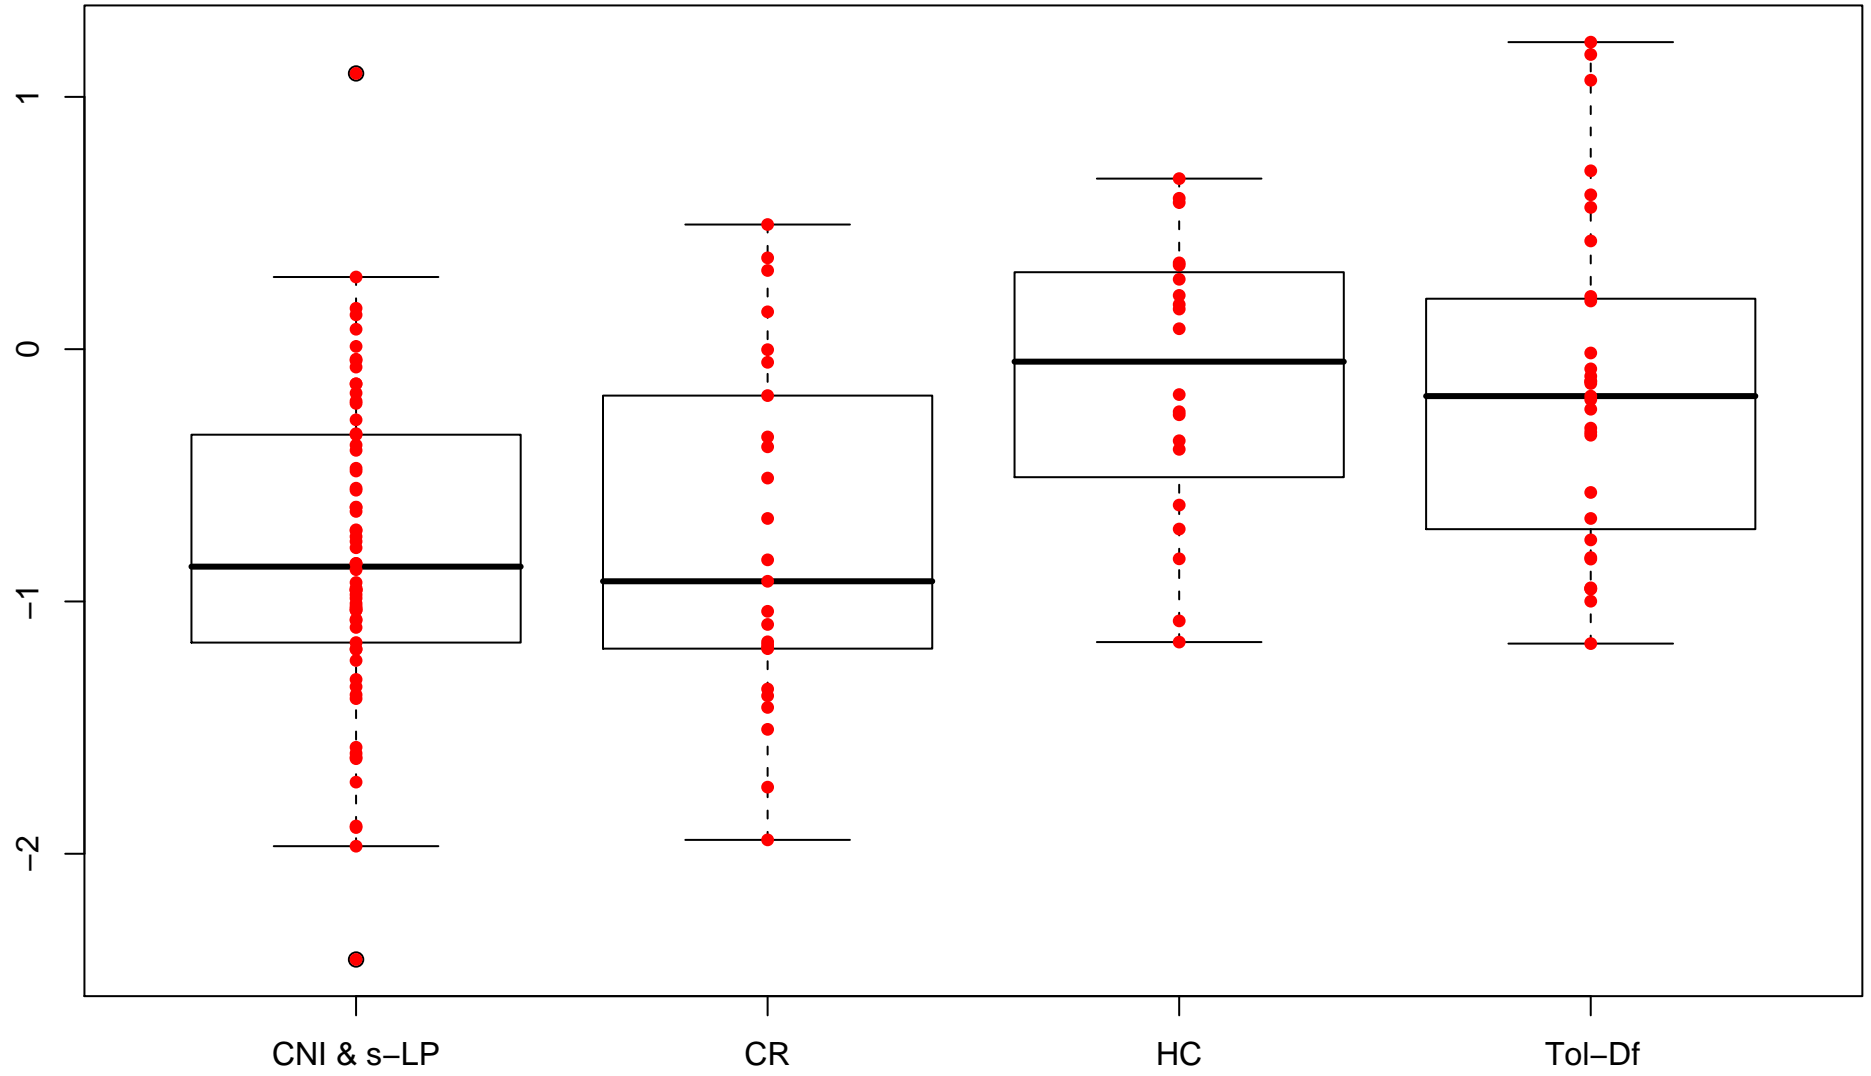

Rank 165 : ENST00000322032  
3.503e-06

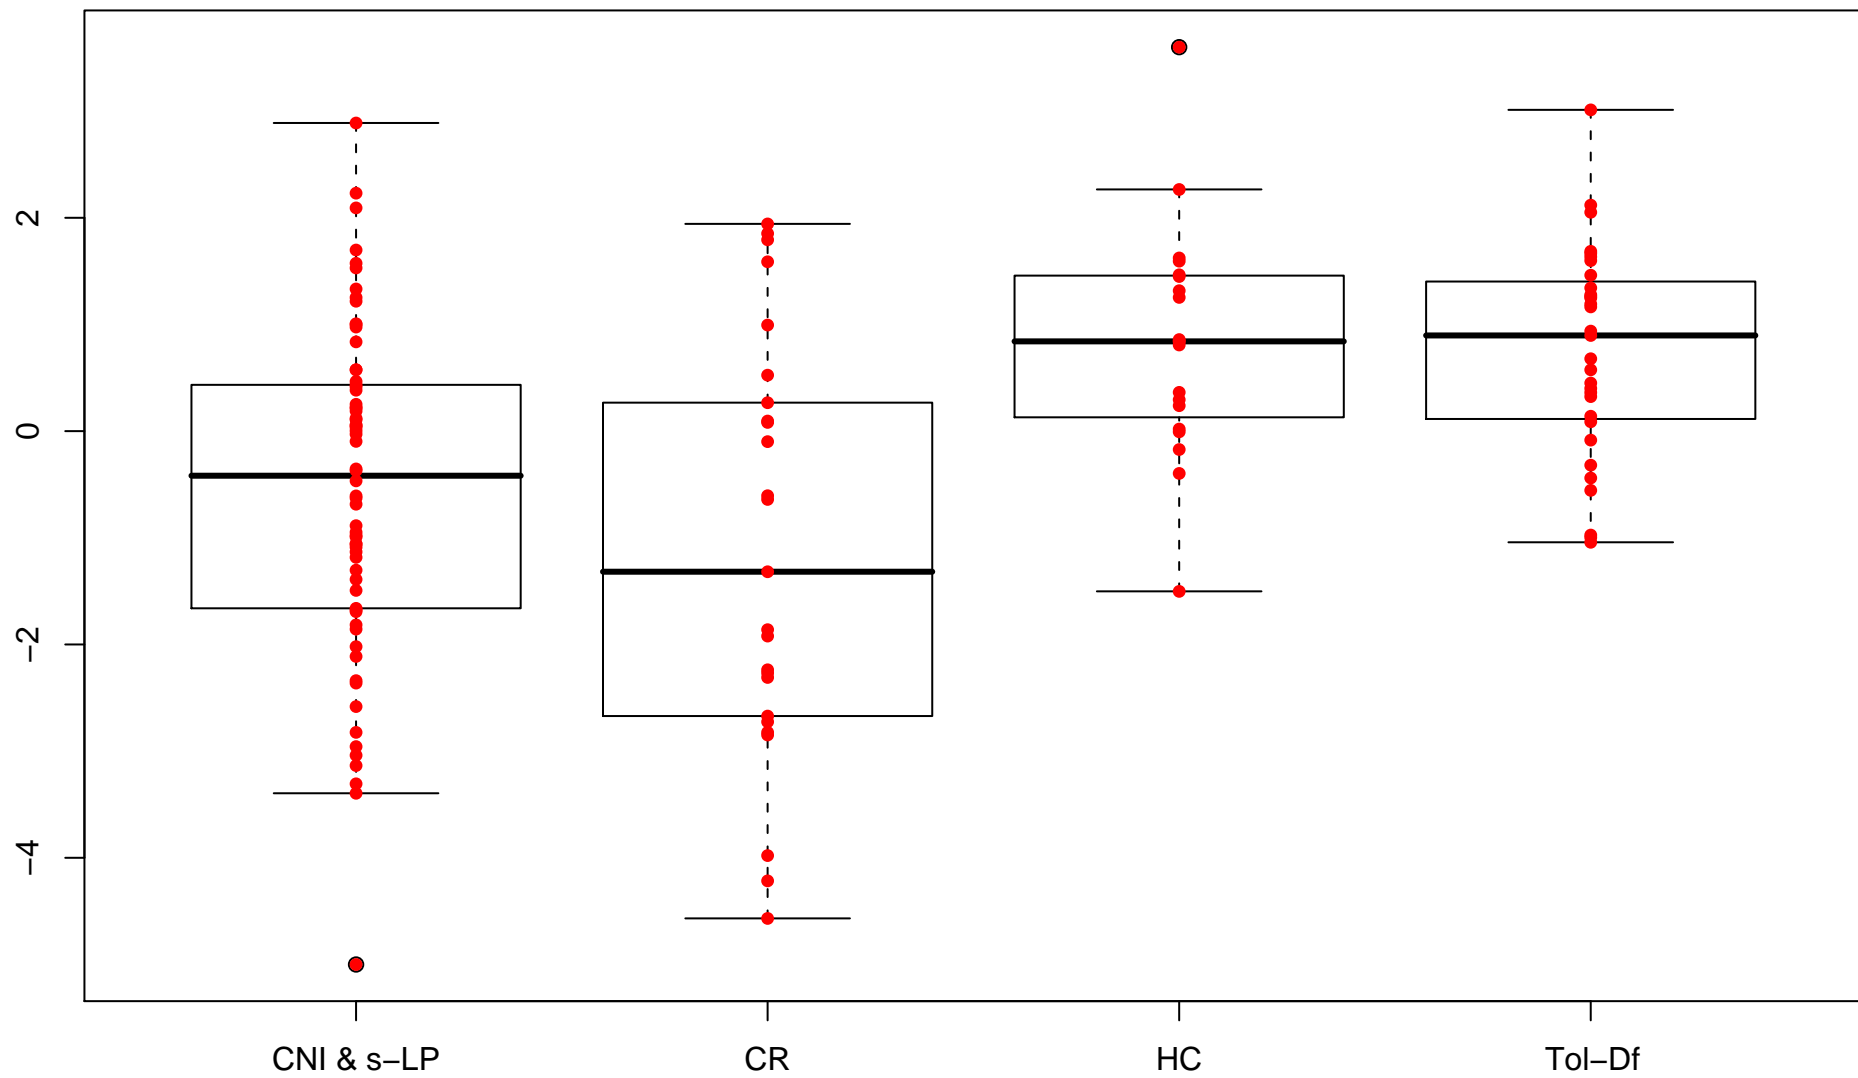

Rank 166 : SLC29A1  
3.552e-06

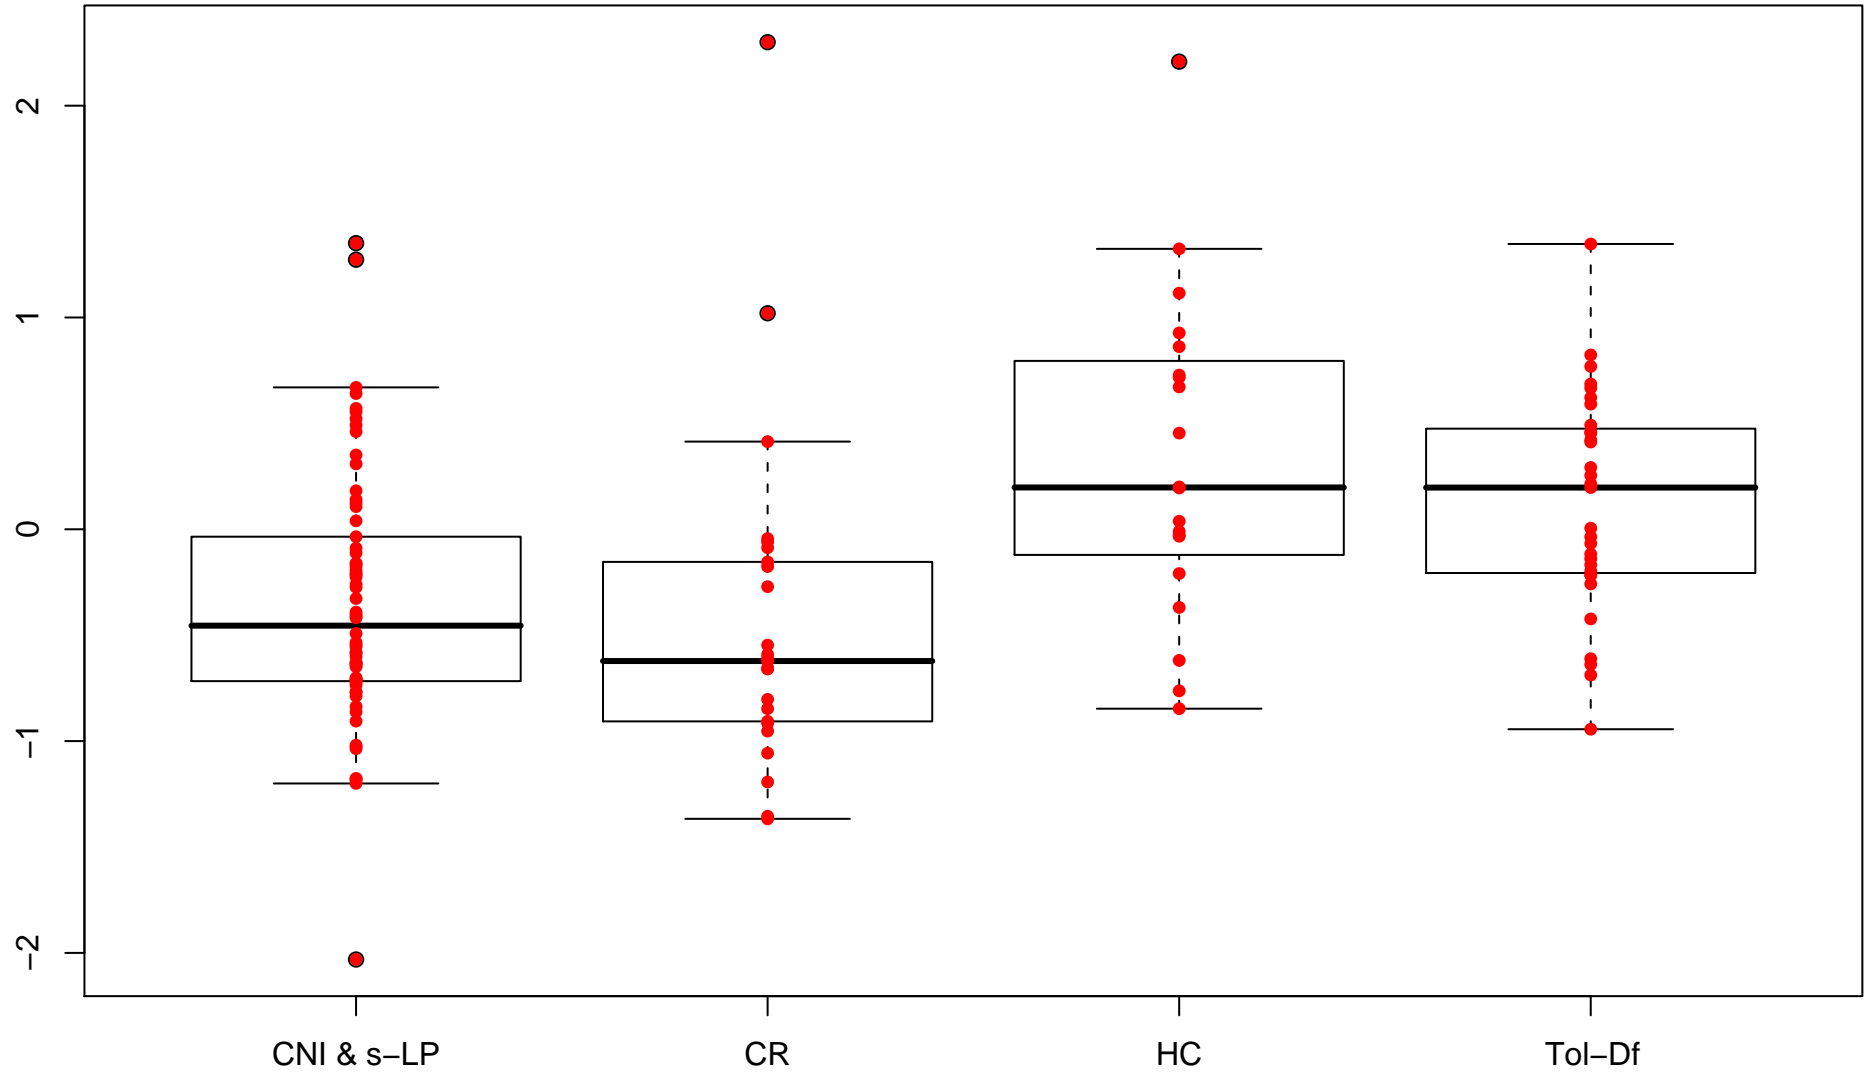

Rank 167 : HSPE1  
3.577e-06

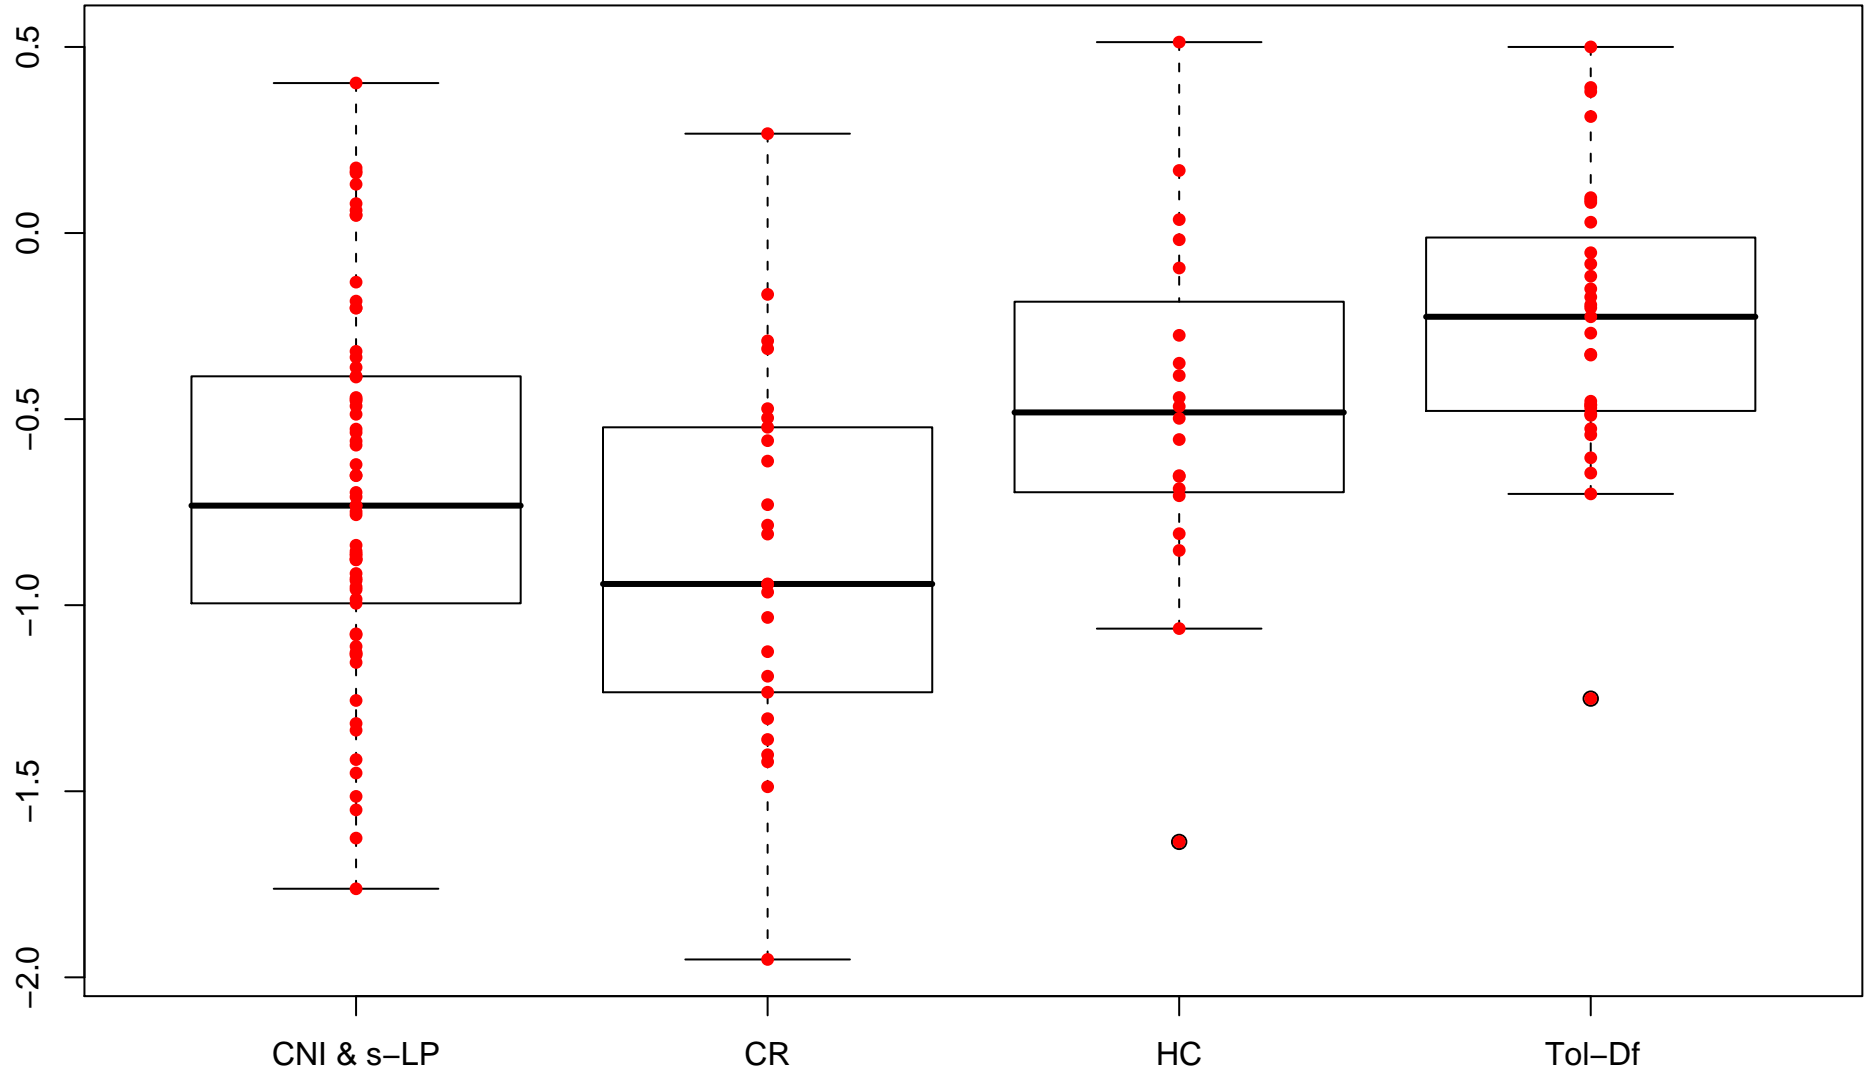



Rank 168 : KLRB1  
3.654e-06

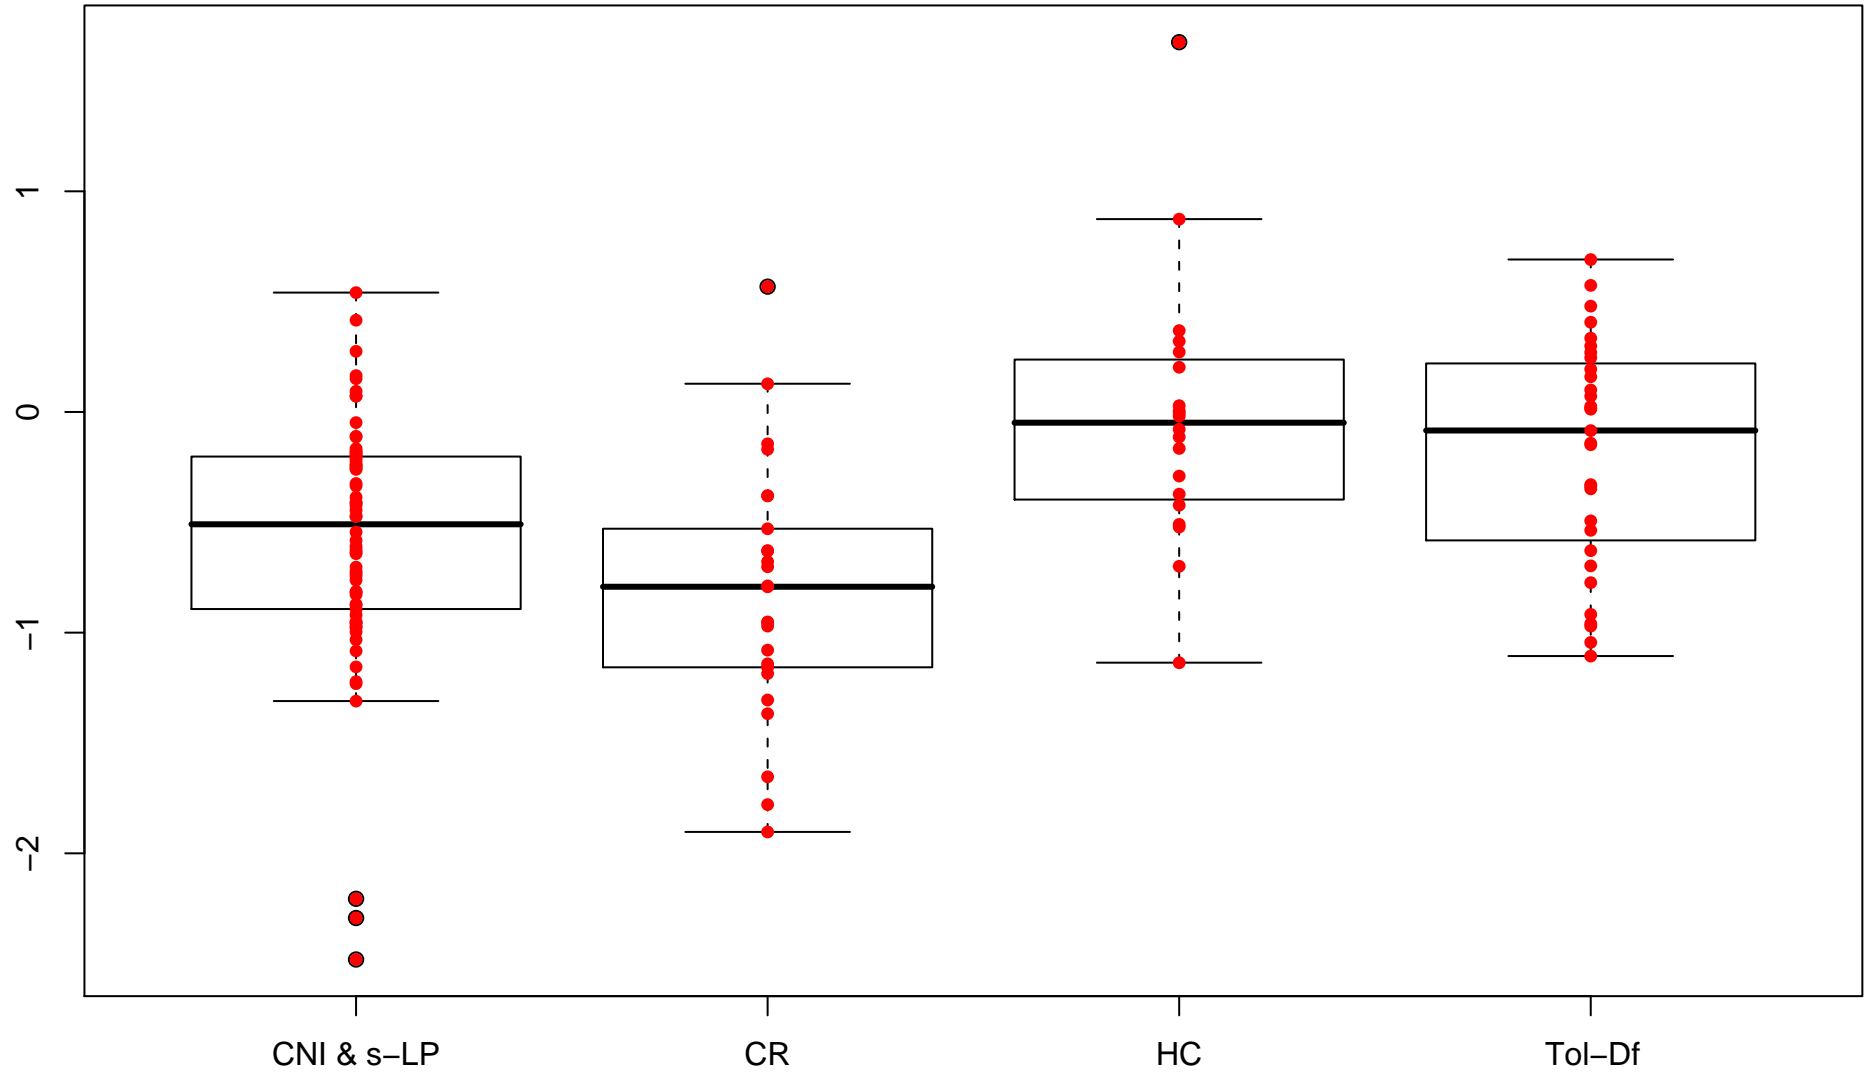

Rank 169 : SLC41A1  
3.757e-06

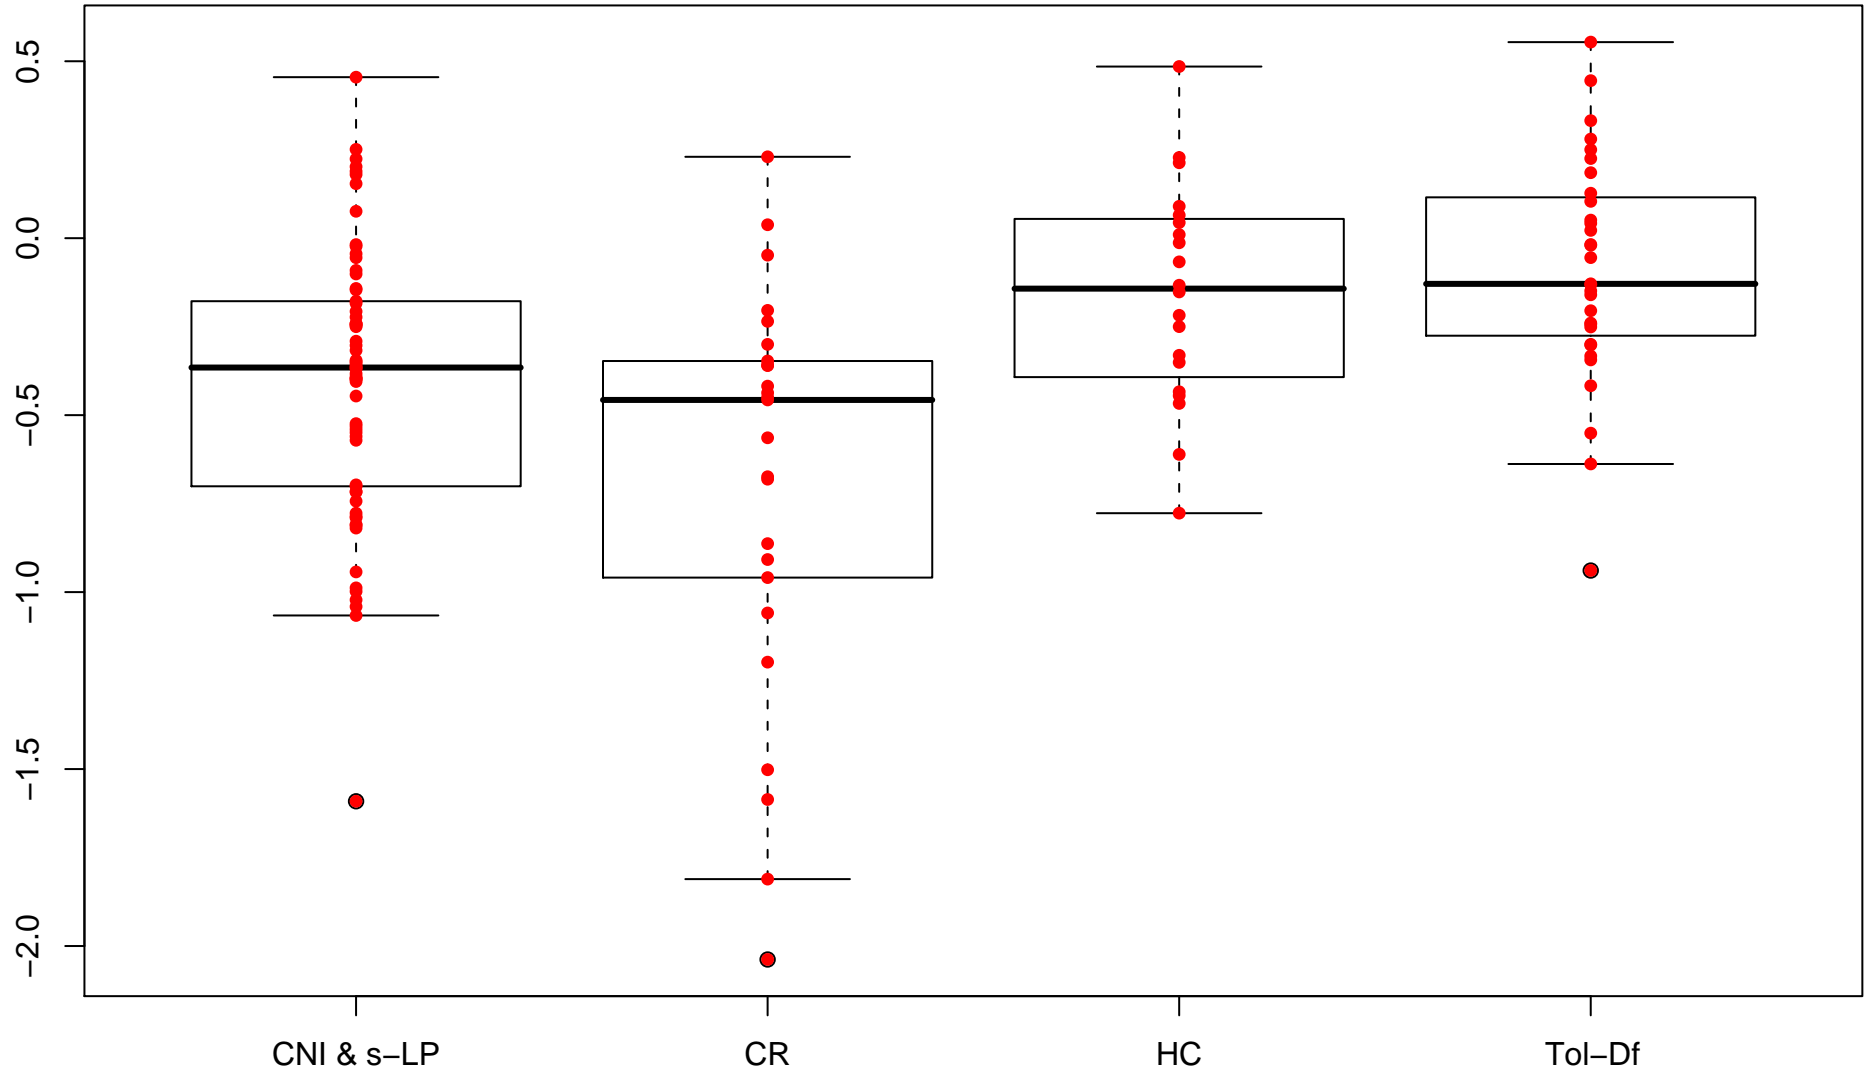

Rank 170 : FZD5  
4.266e-06

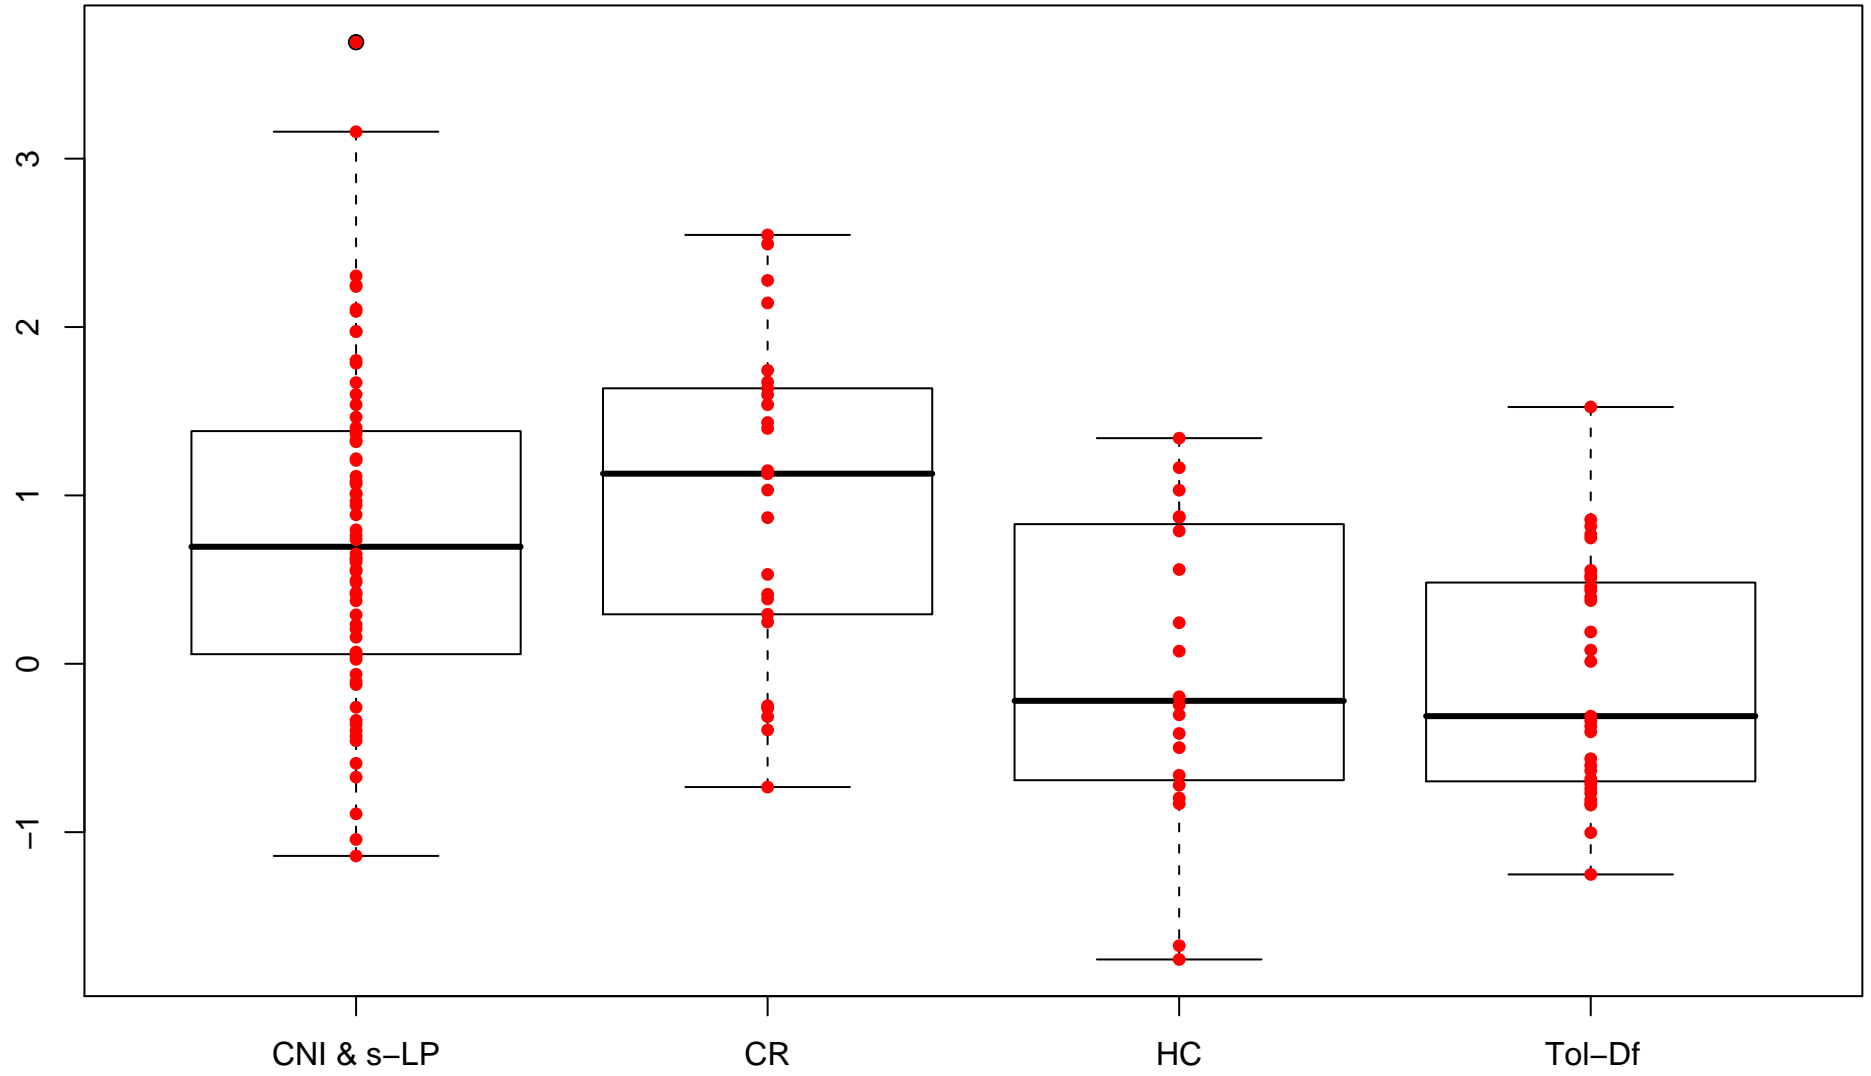

Rank 171 : AK094477  
4.272e-06

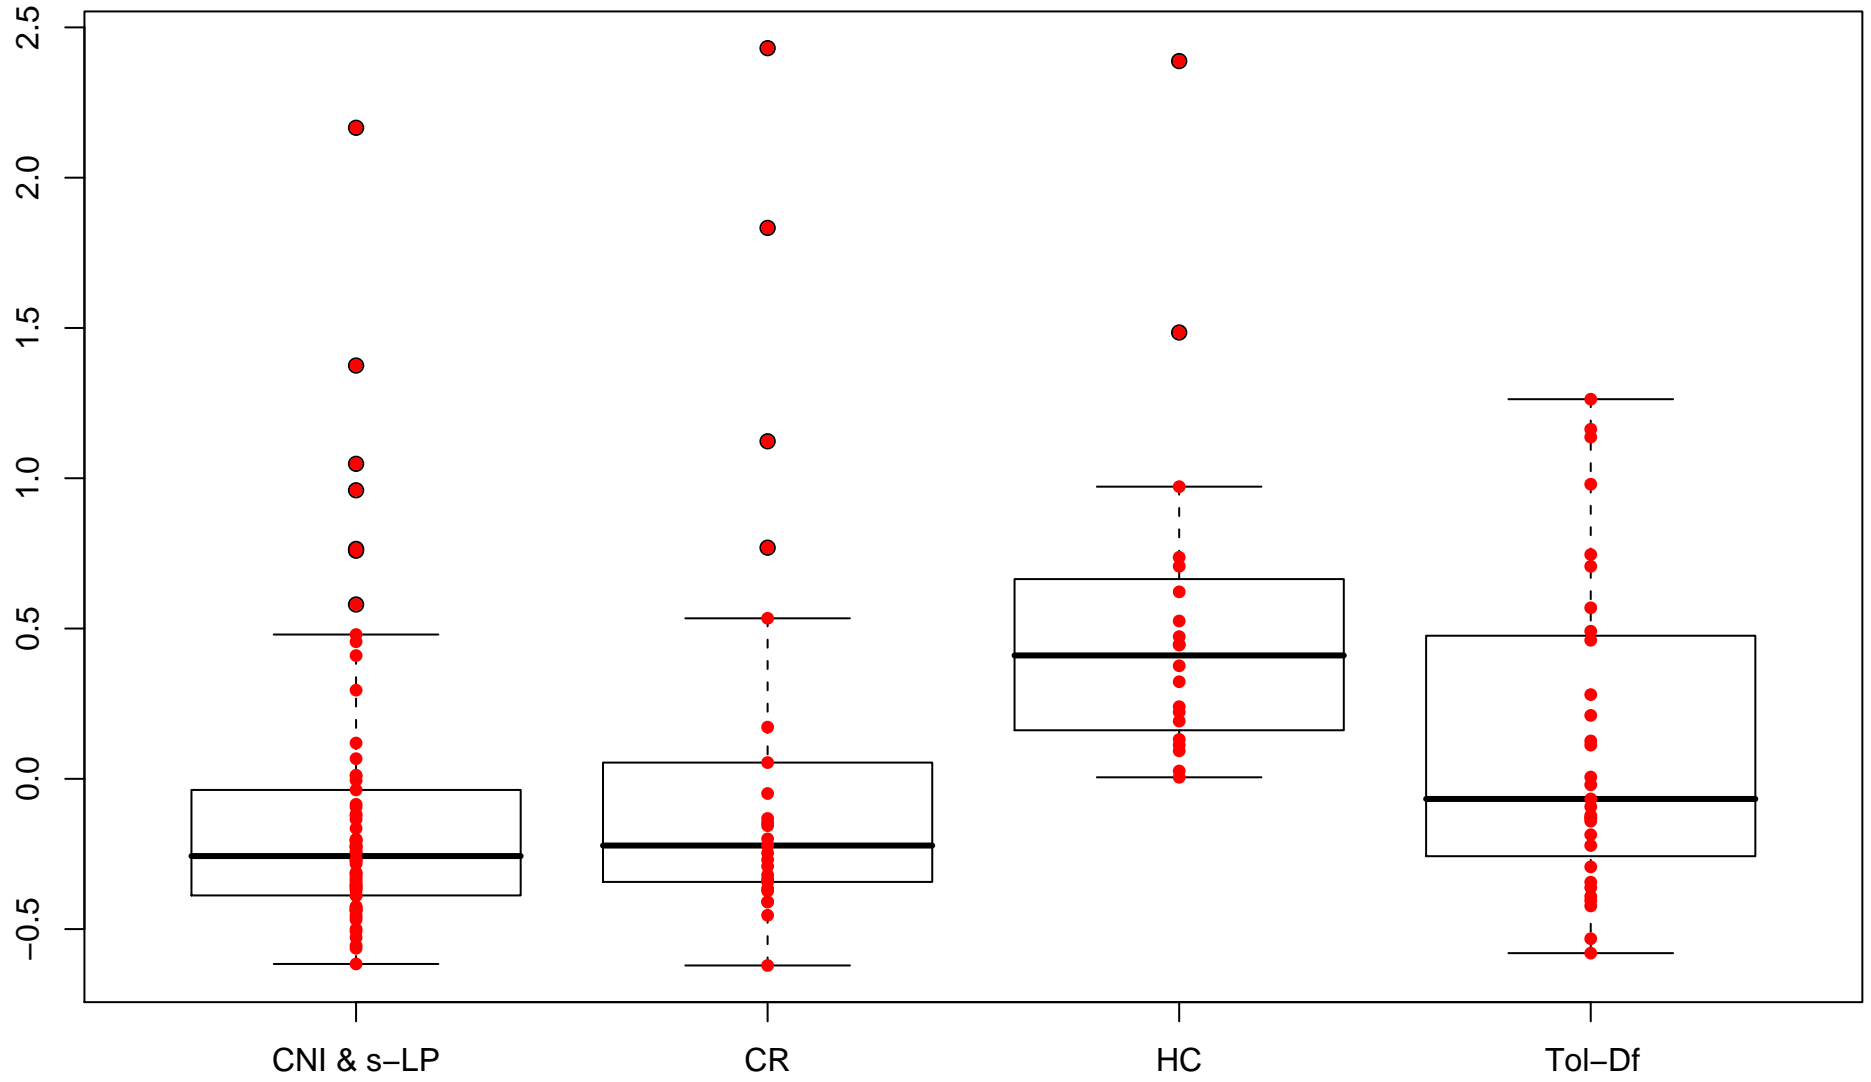

Rank 172 : ETAA1  
4.419e-06

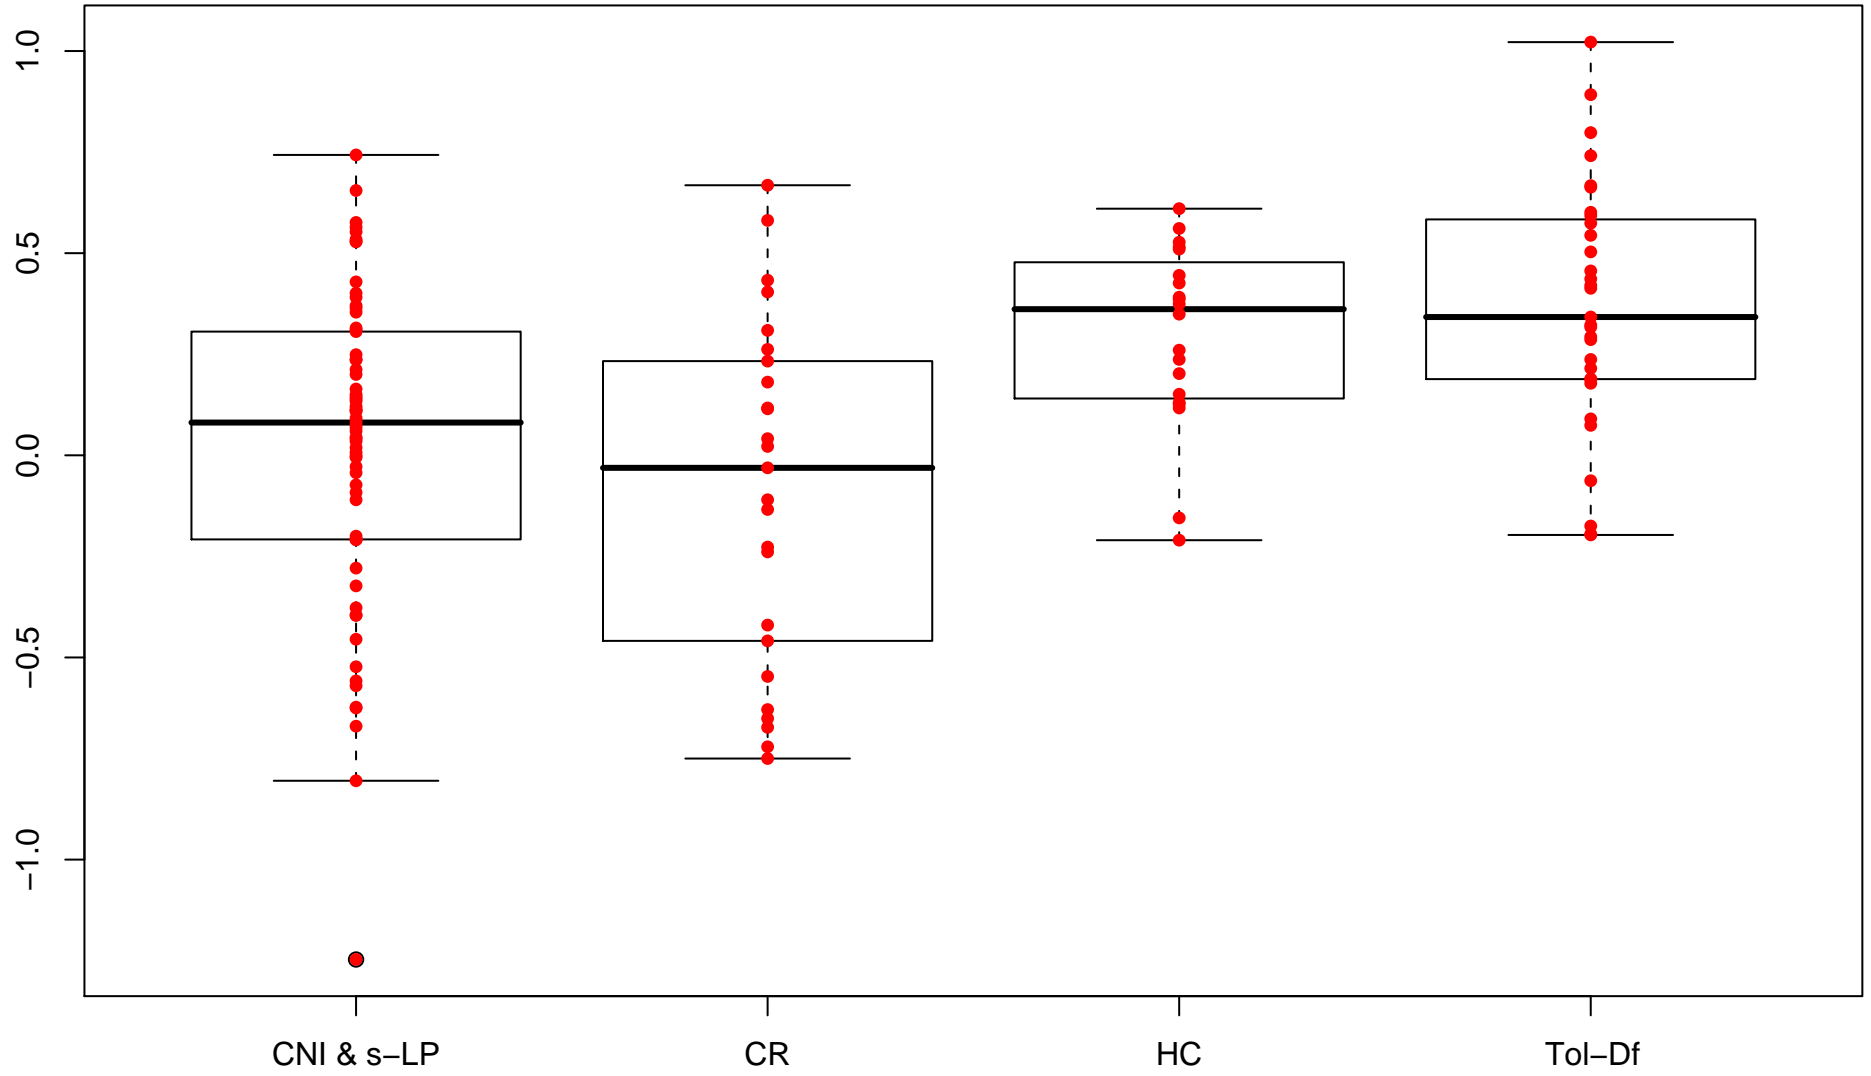

Rank 173 : CA433167  
4.542e-06

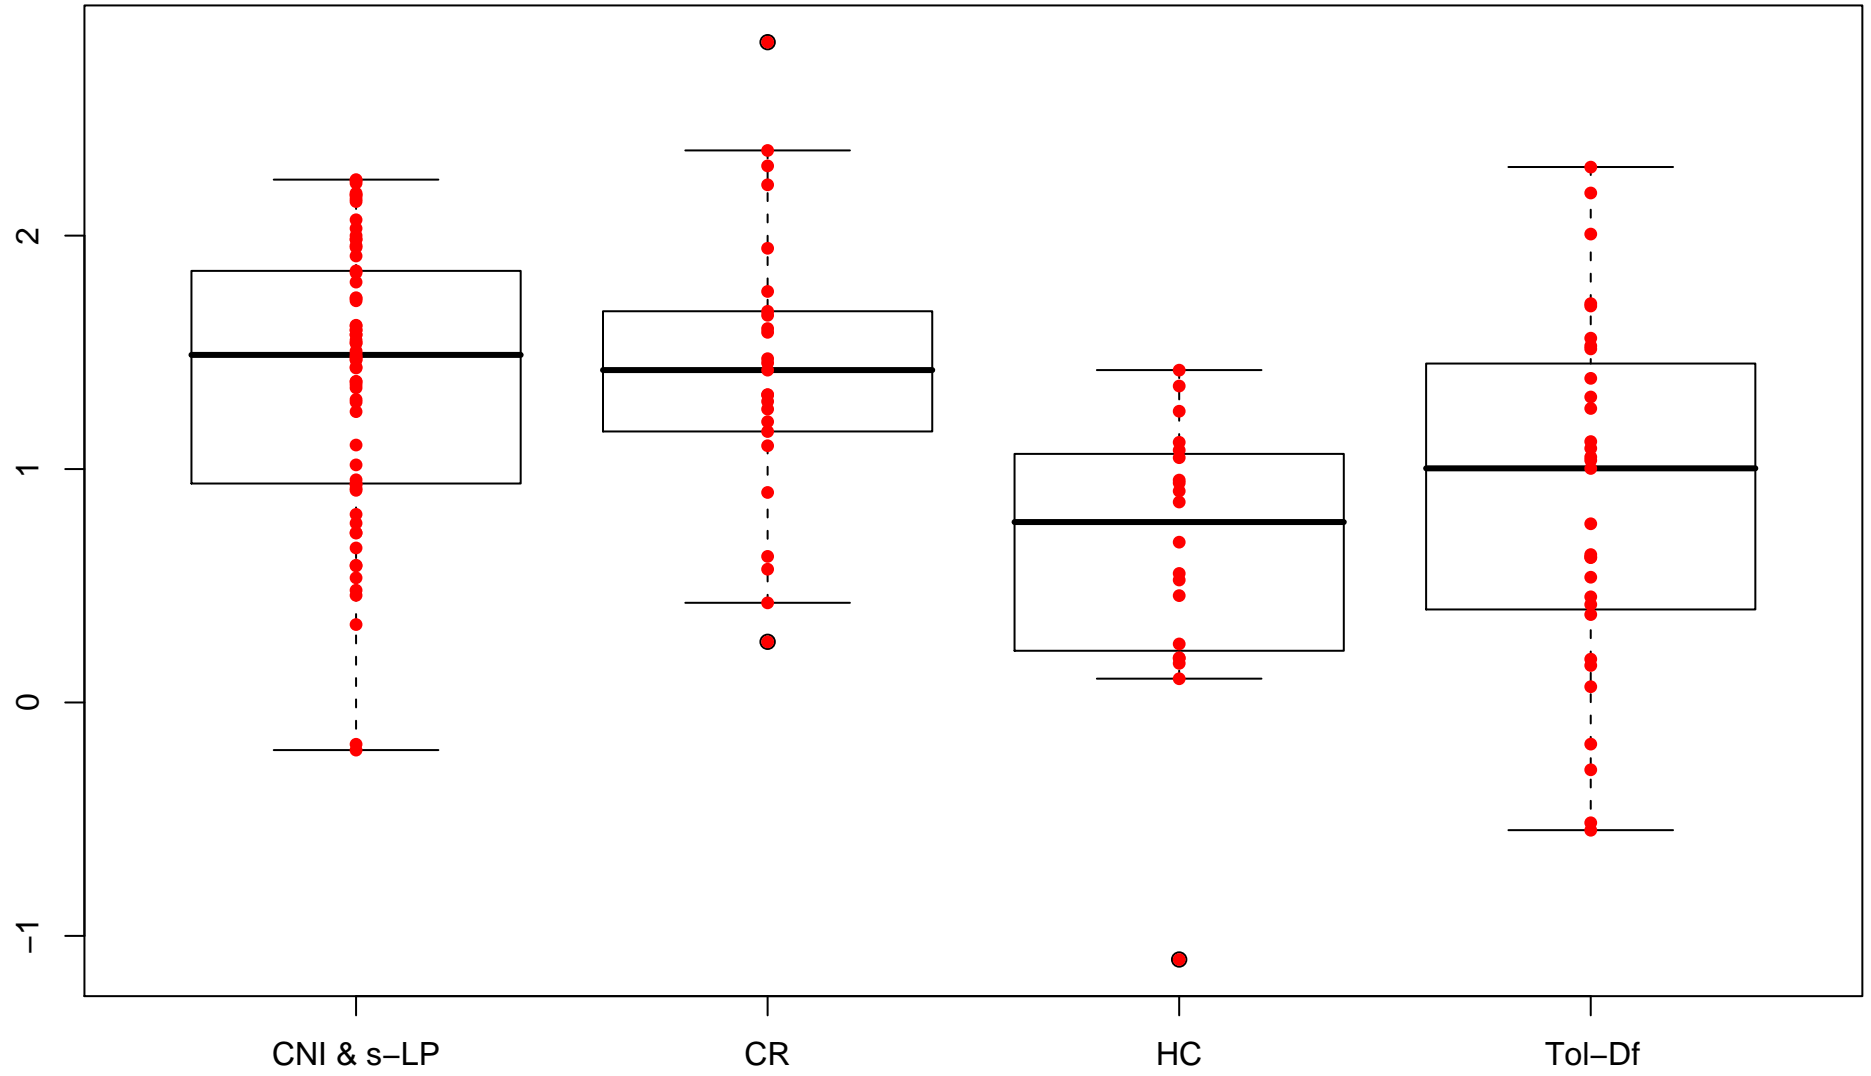

Rank 174 : STAG3  
4.574e-06

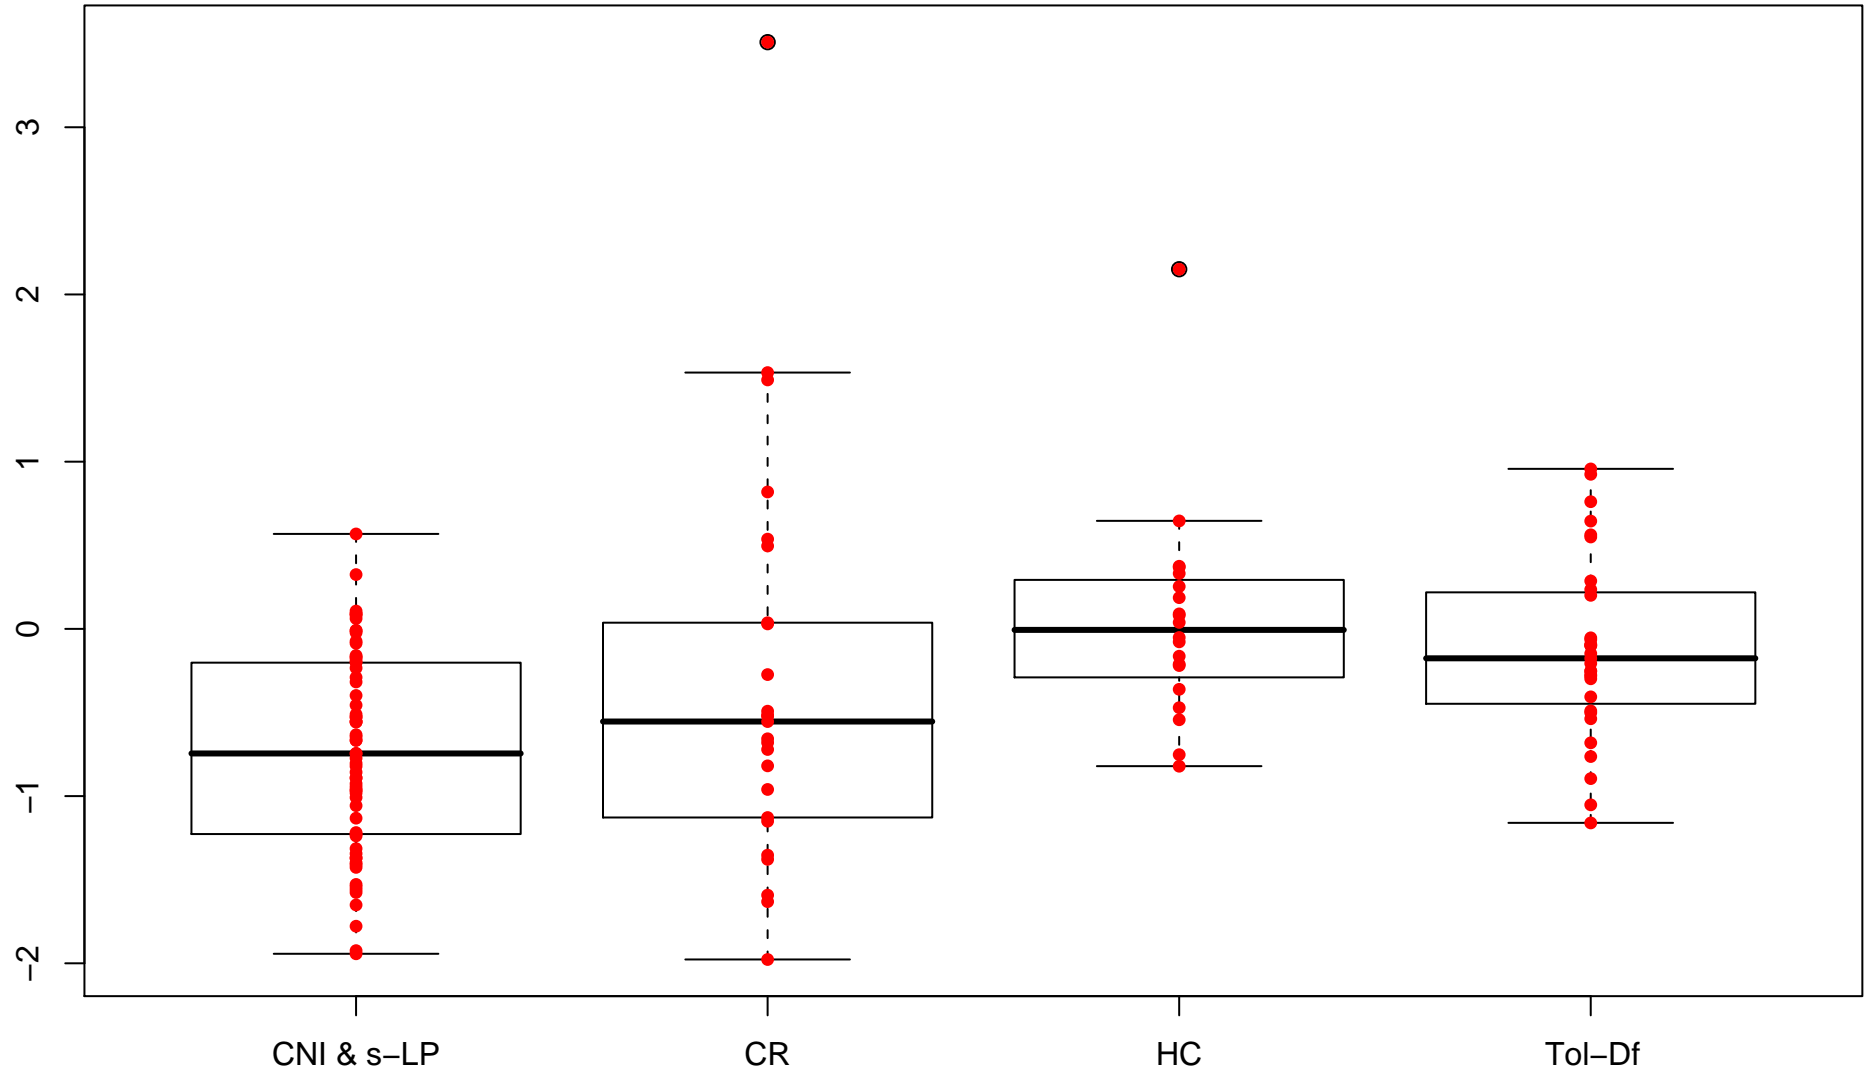

Rank 175 : C6ORF105  
4.716e-06

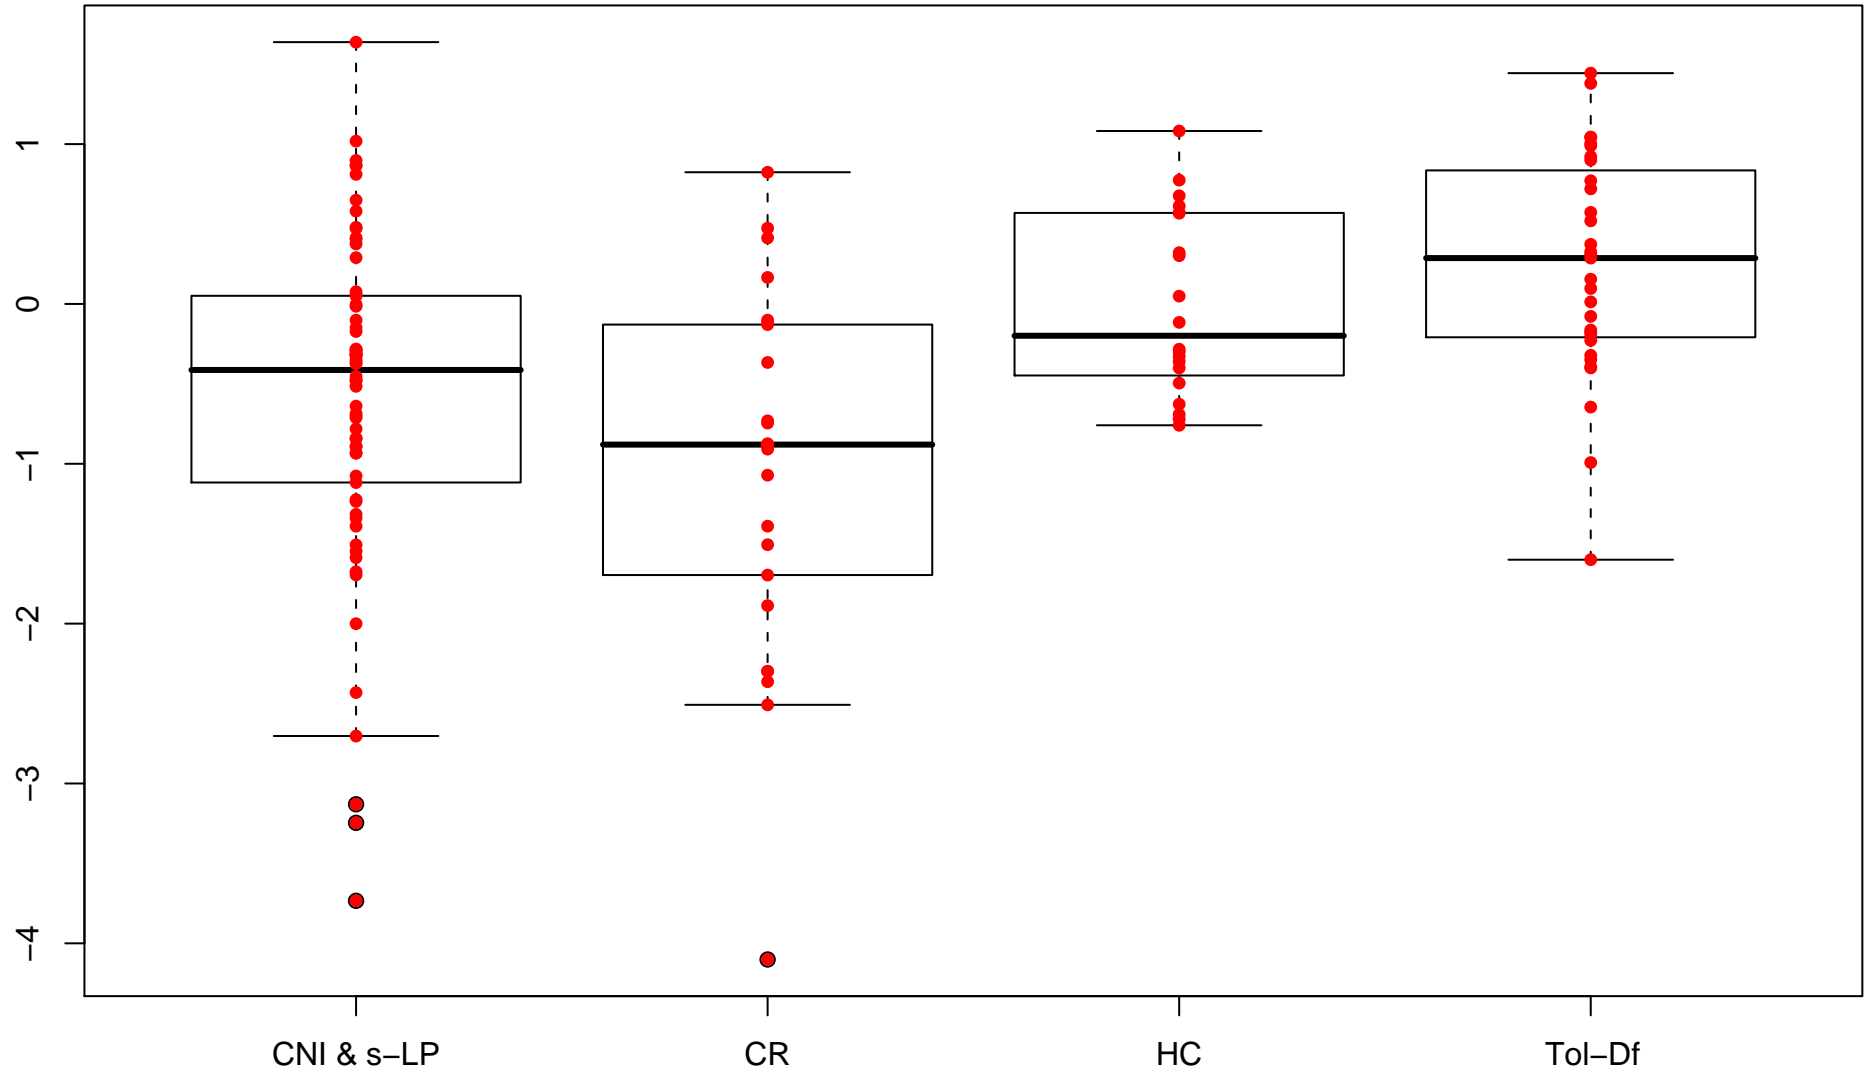



Rank 176 : BEX4  
4.836e-06

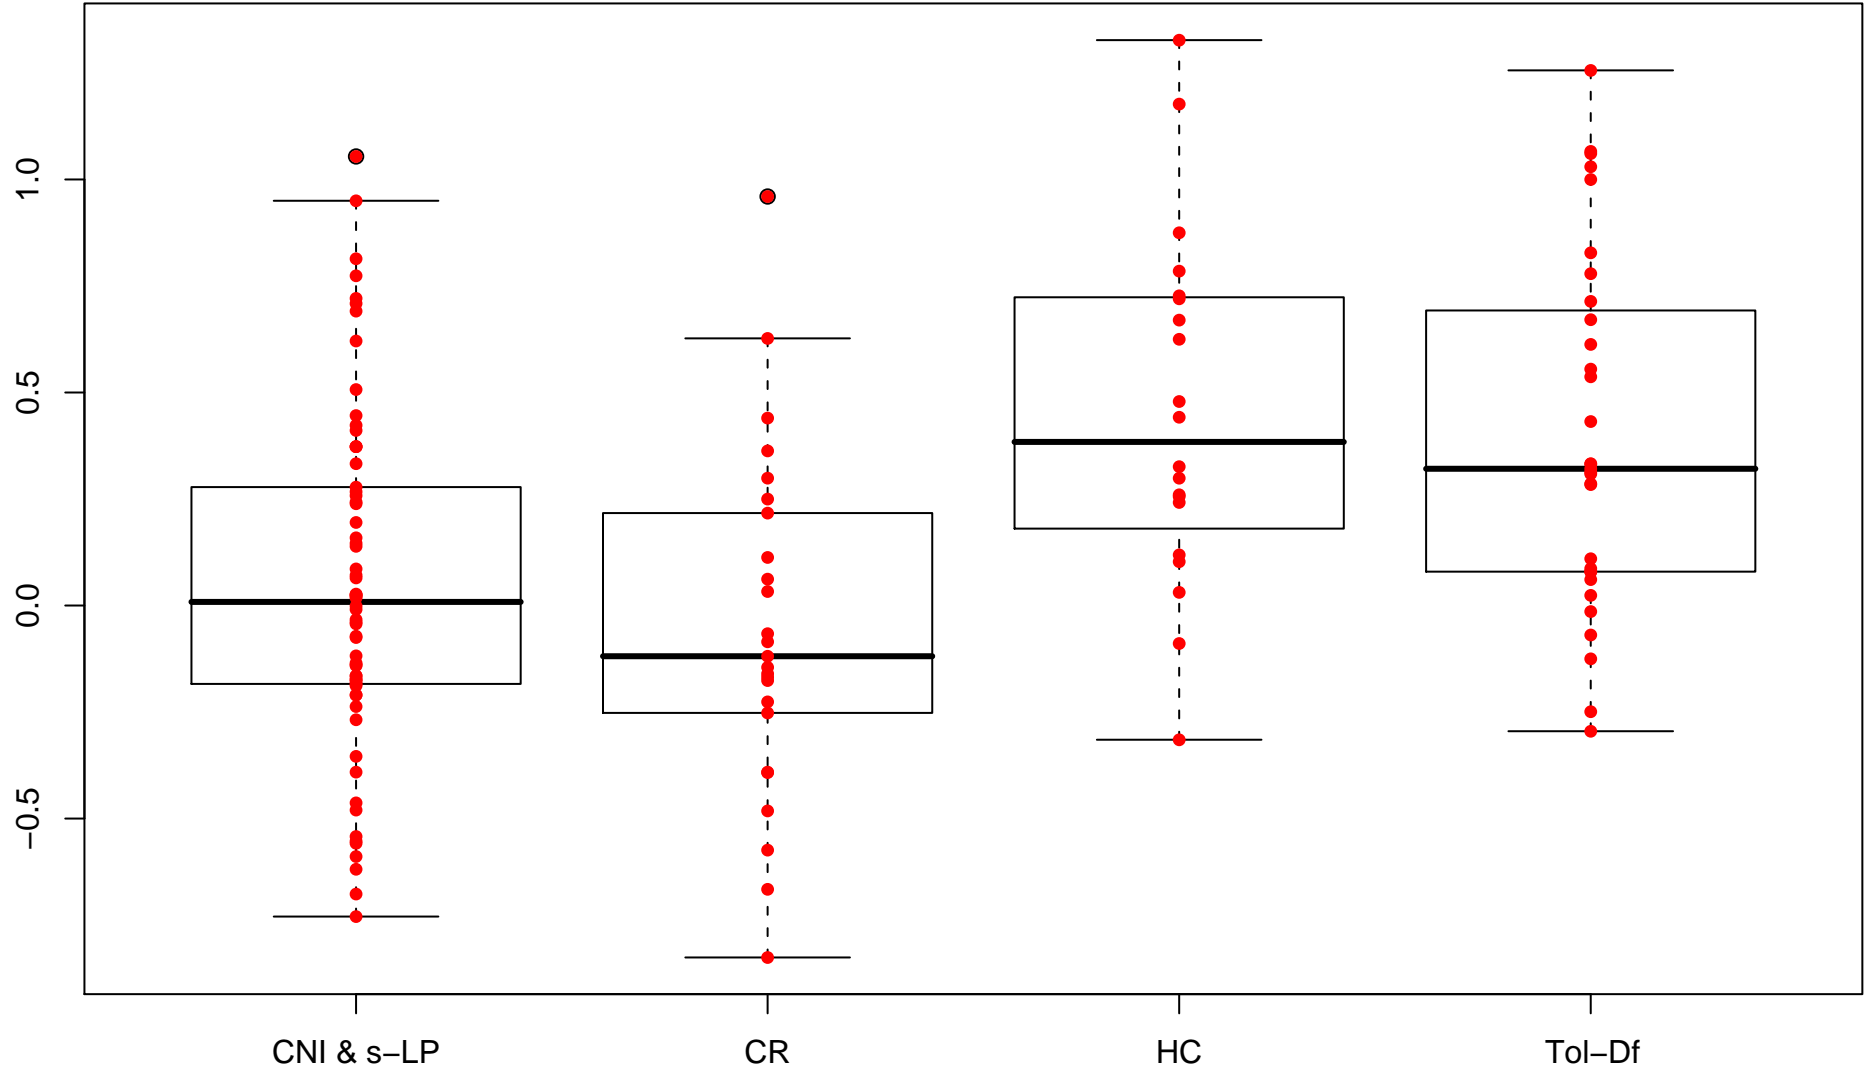

Rank 177 : PPWD1  
4.993e-06

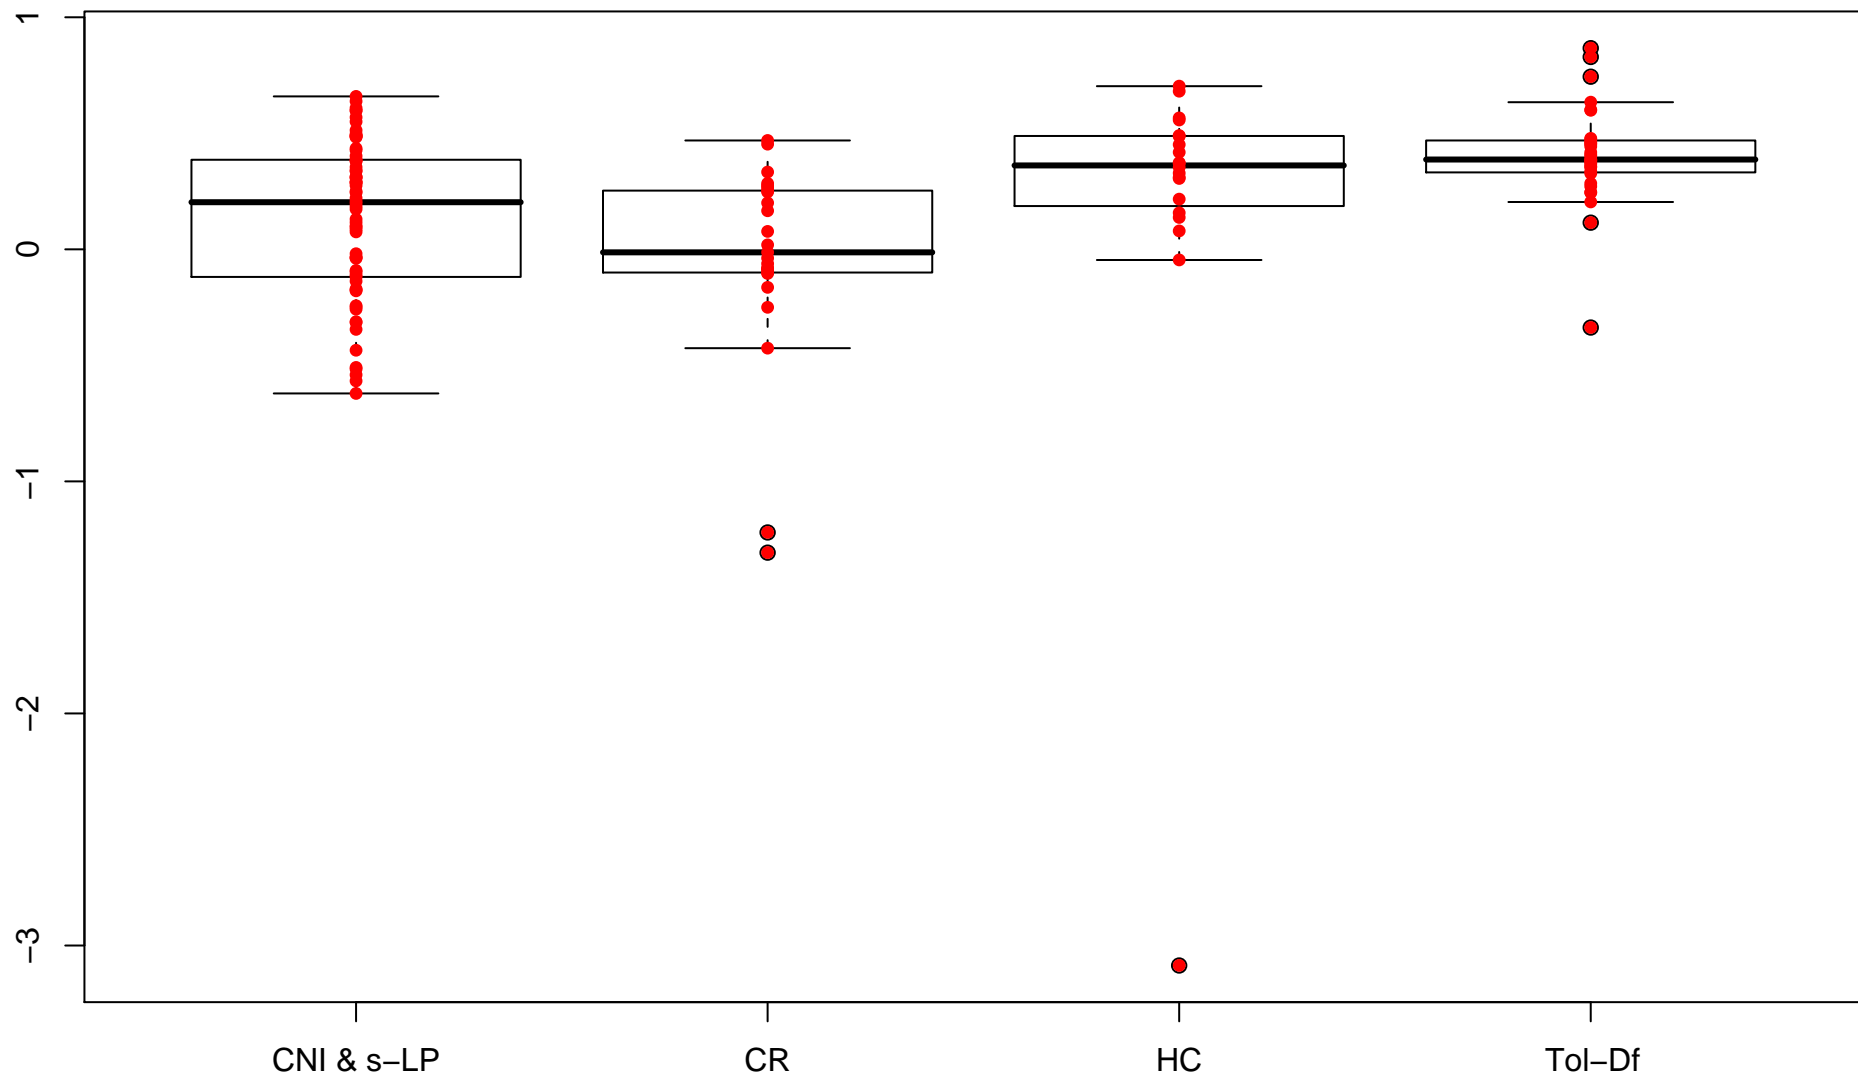

Rank 178 : RNASE2  
5.457e-06

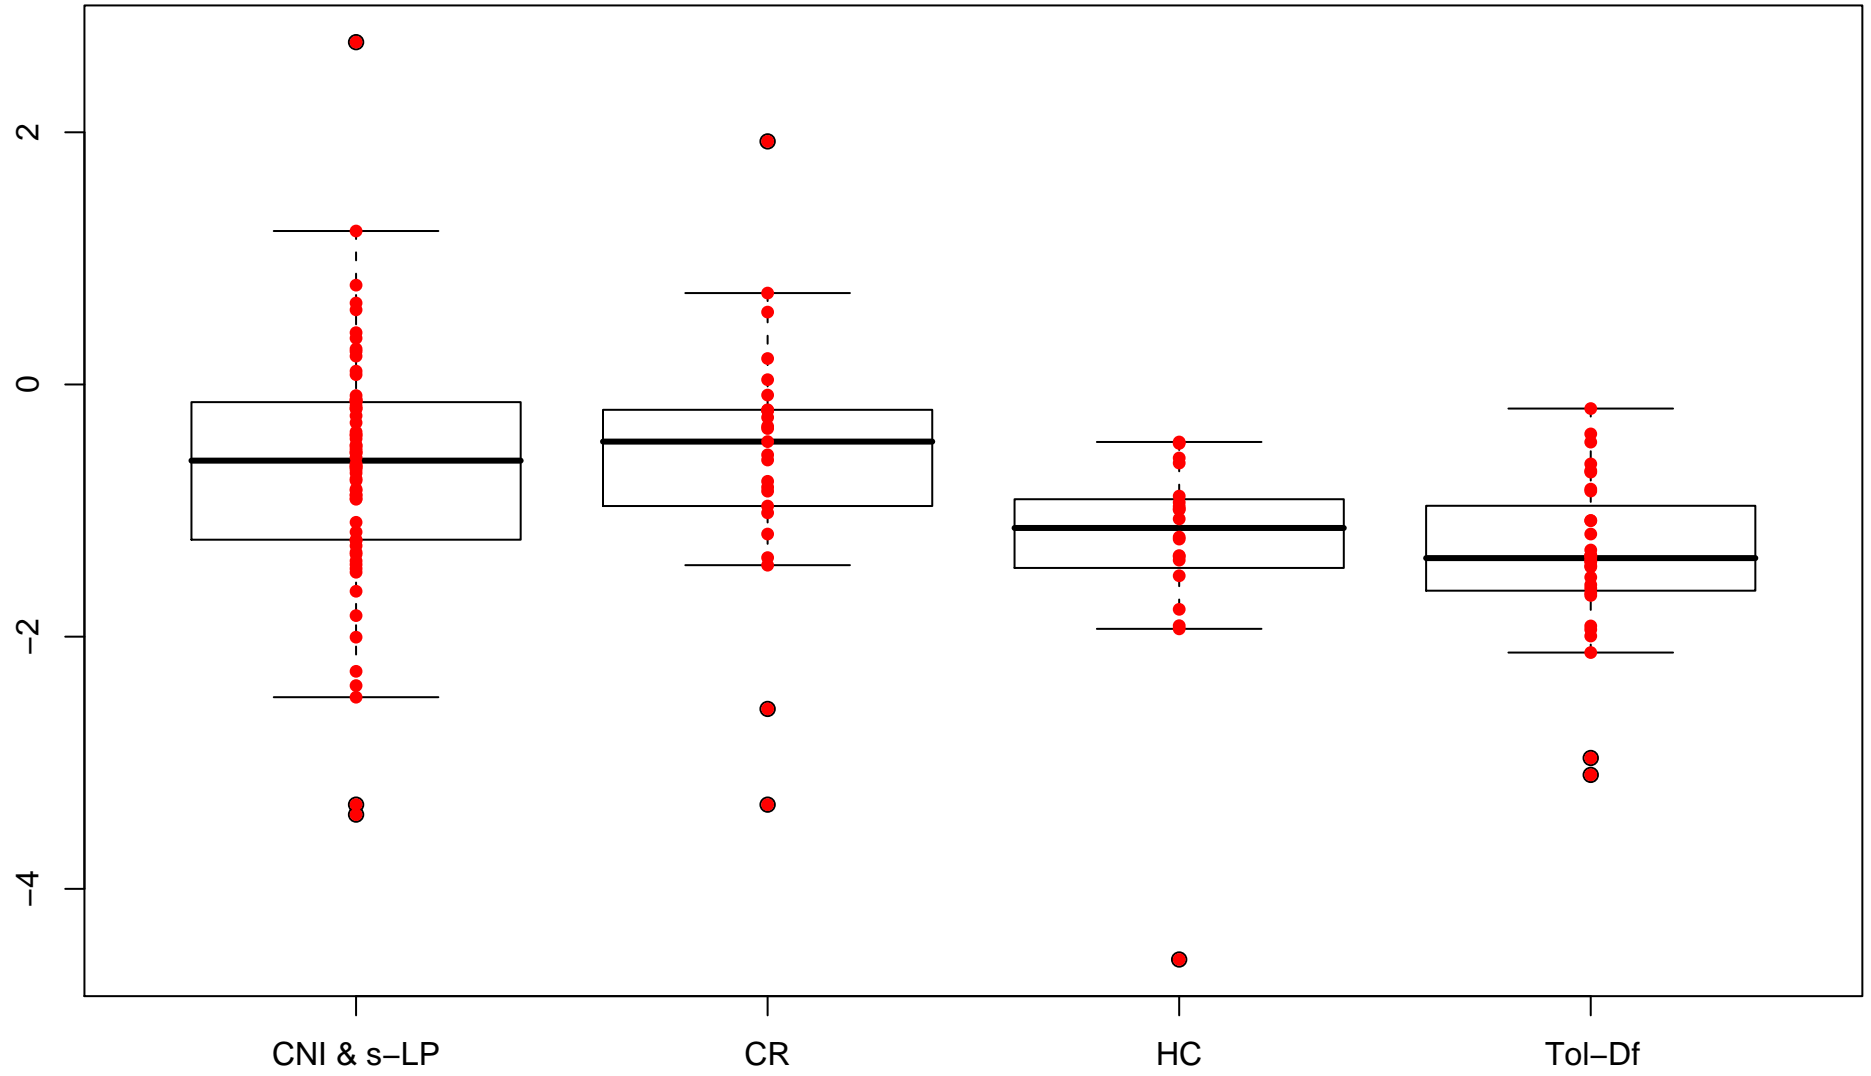

Rank 179 : INHBA  
5.621e-06

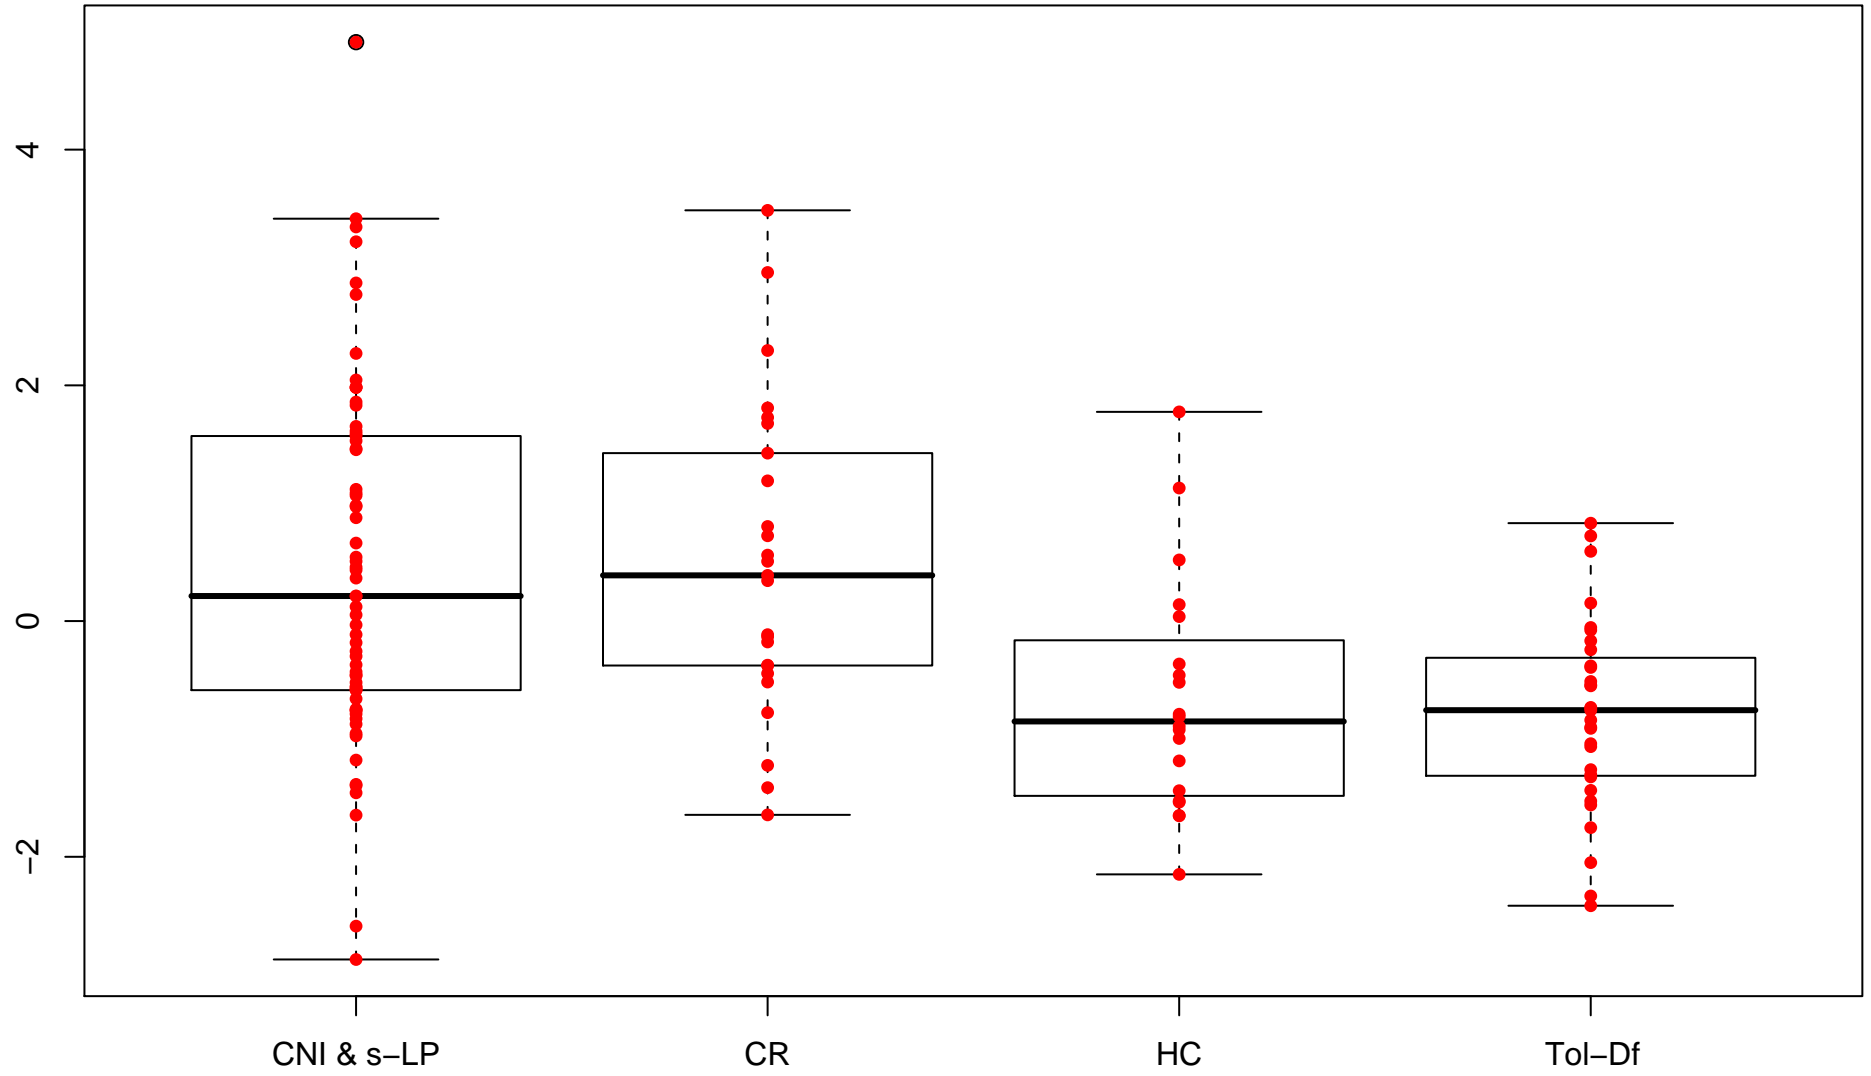

Rank 180 : SPRY1  
5.899e-06

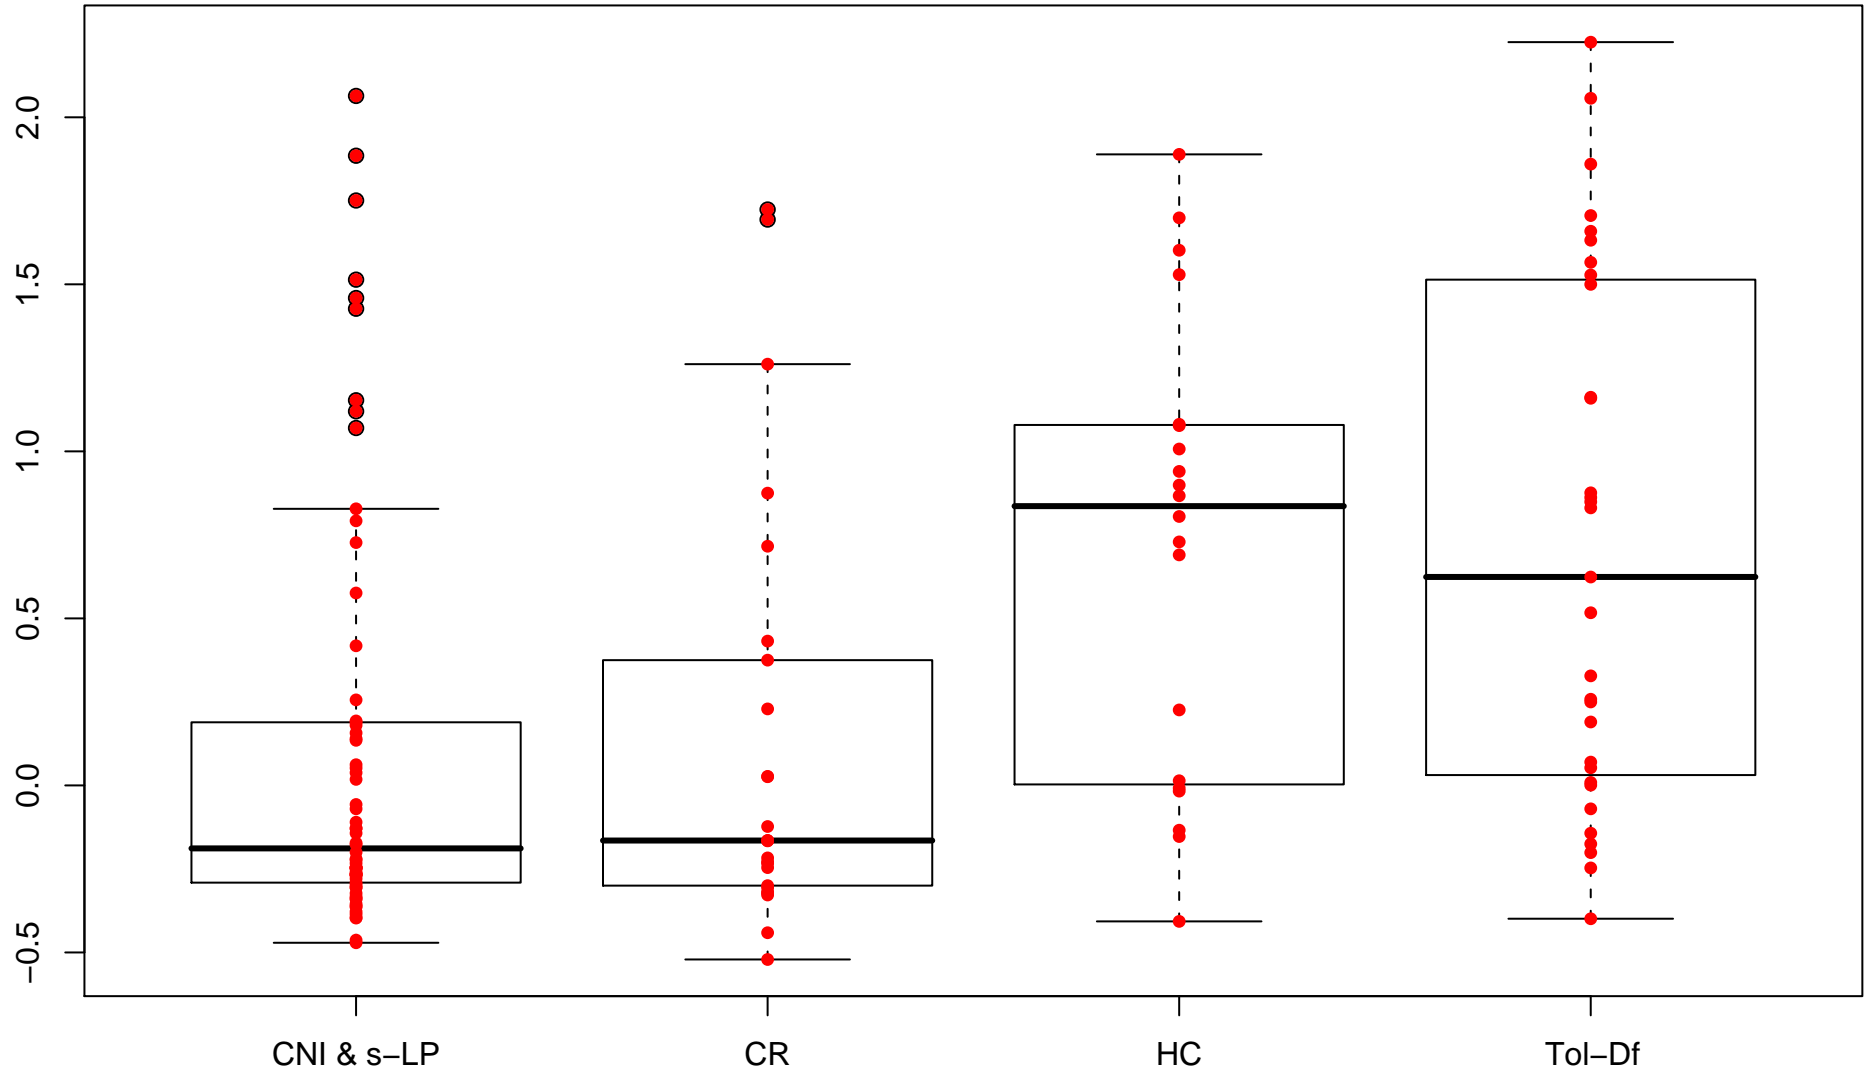

Rank 181 : THC2349739  
6.006e-06

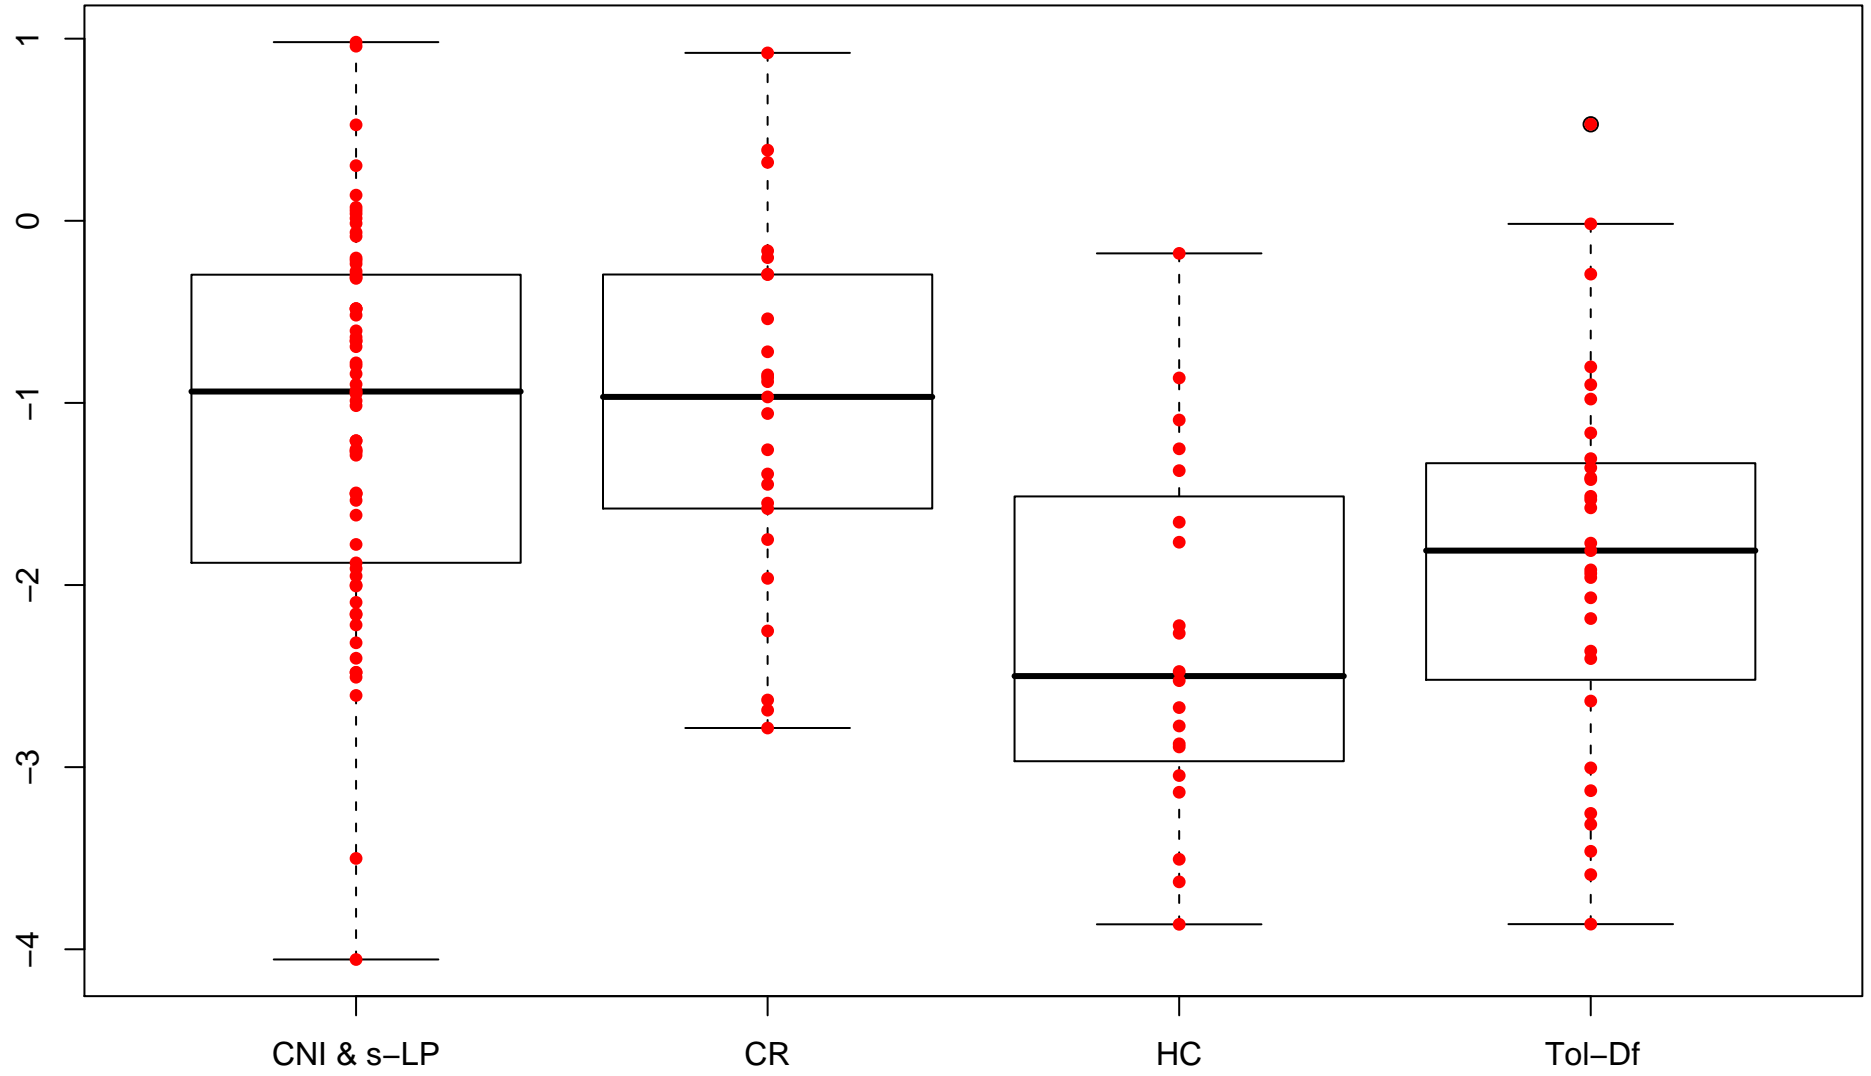

Rank 182 : RECK  
6.034e-06

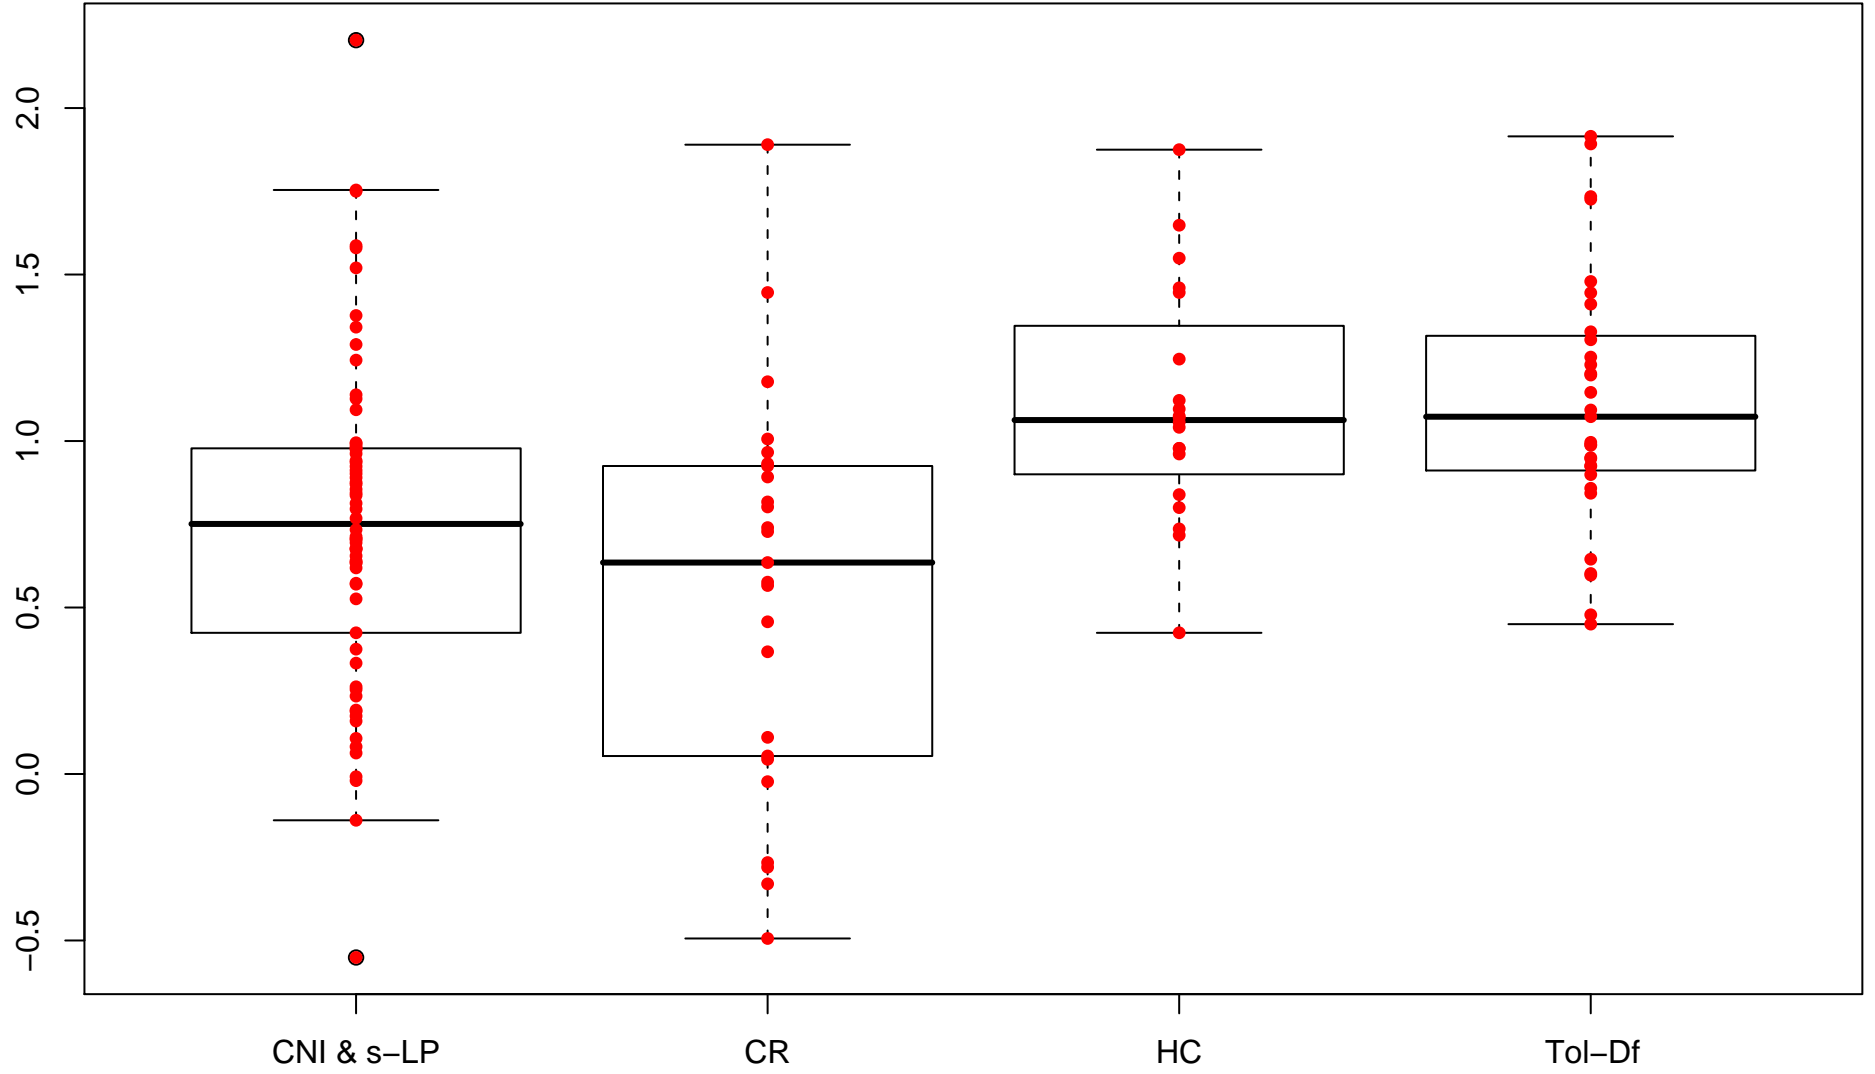

Rank 183 : ARID5B  
6.489e-06

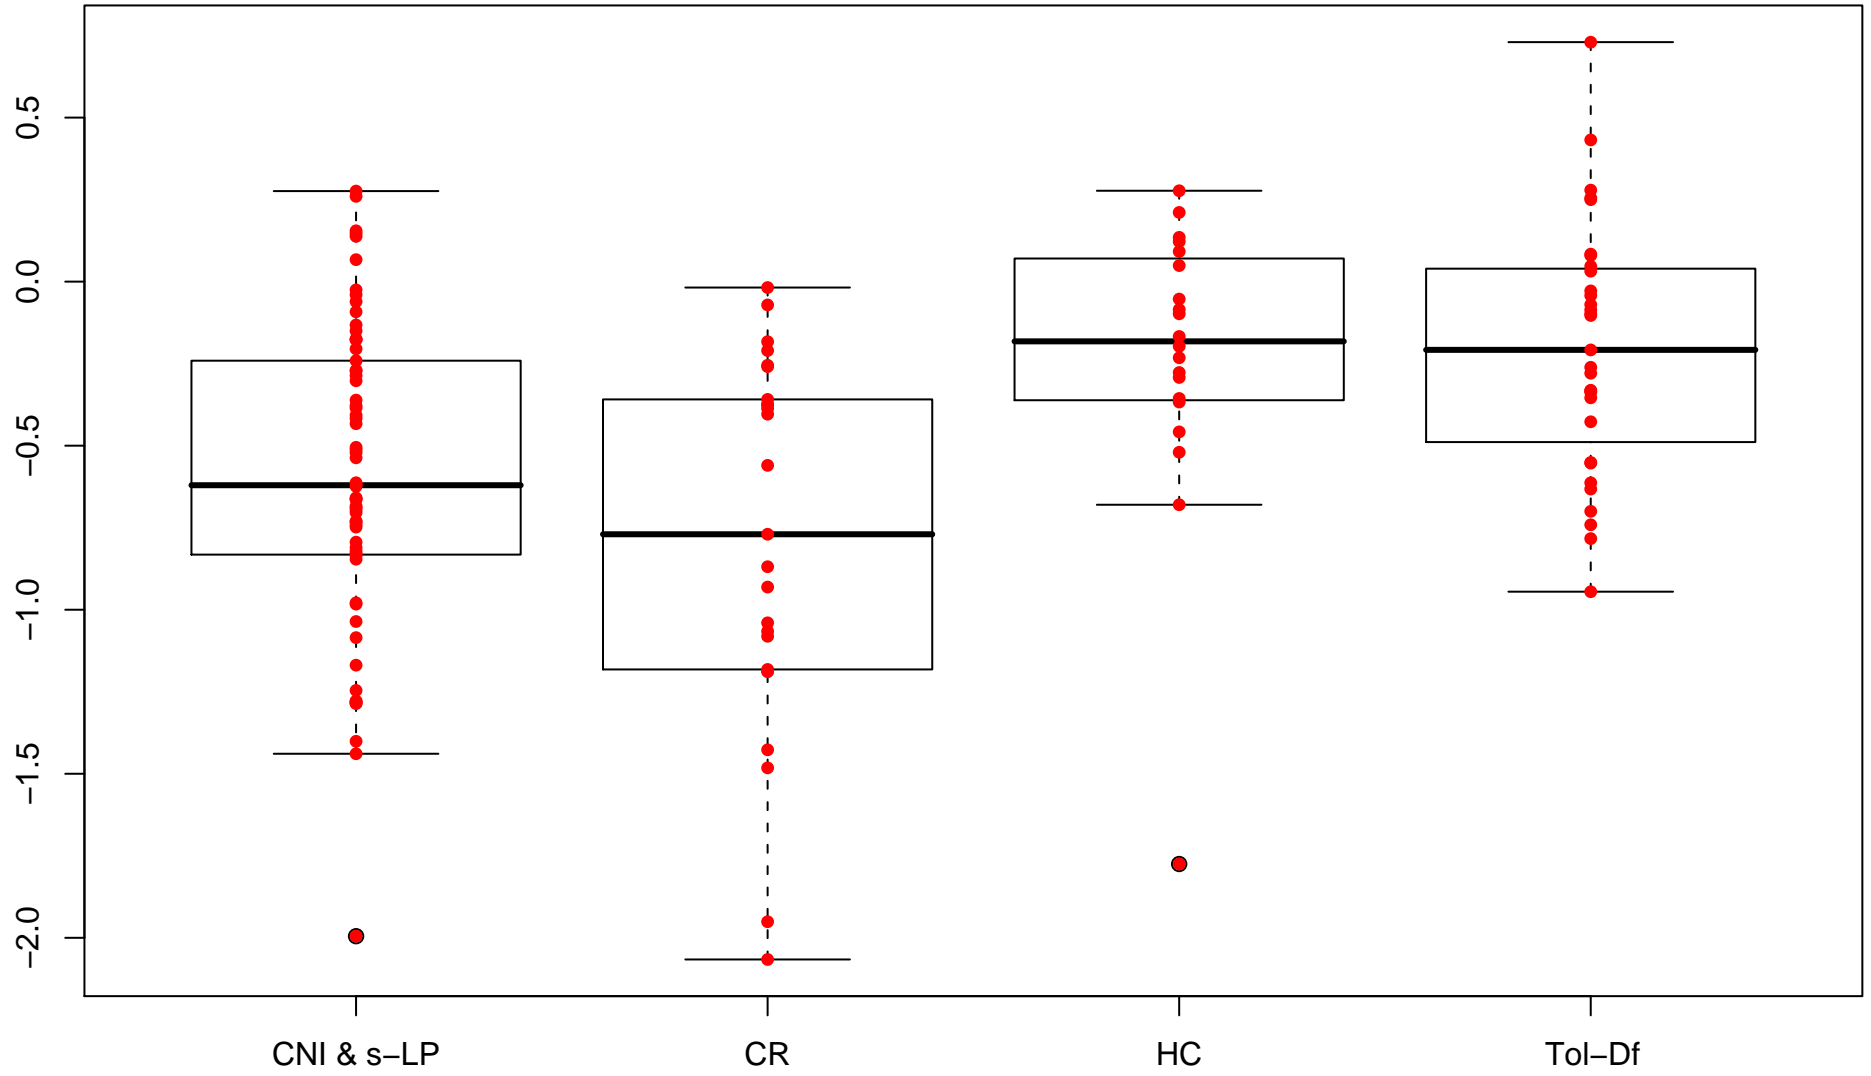



Rank 184 : RPS27A  
6.738e-06

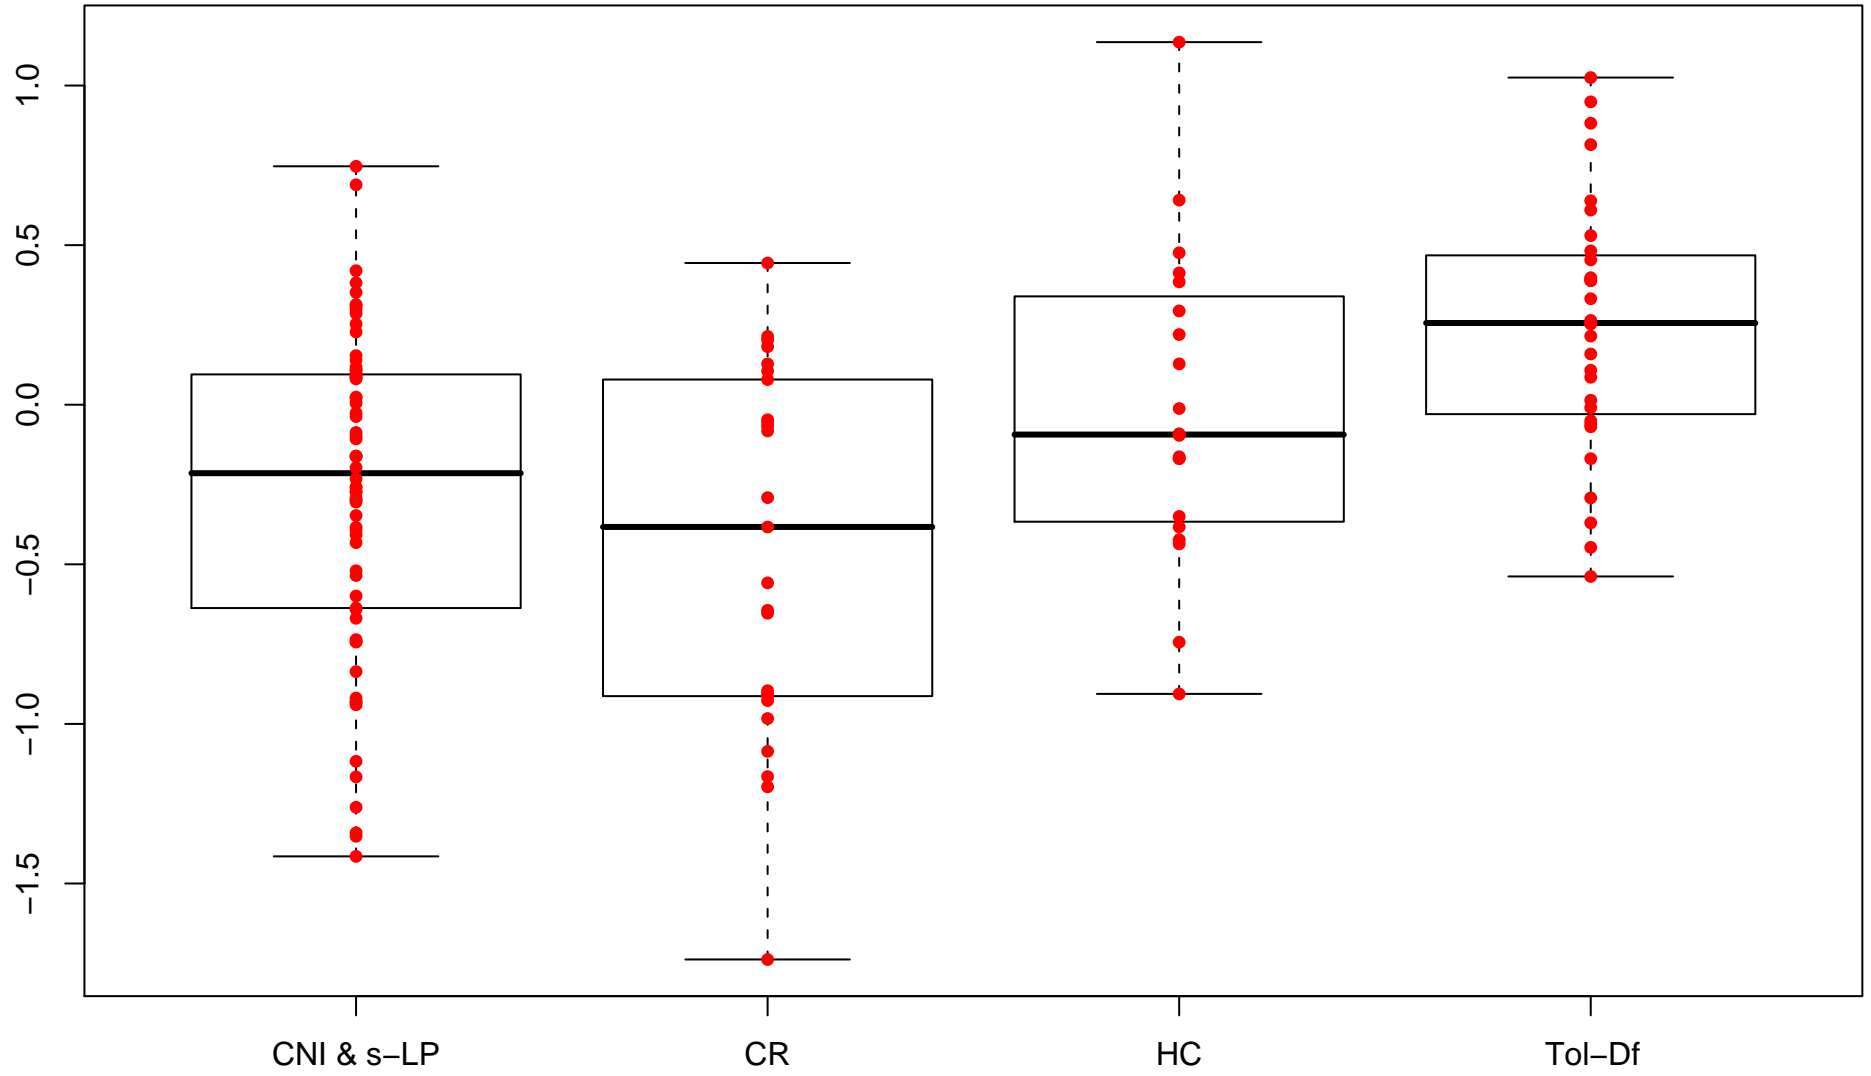

Rank 185 : ATXN3  
6.741e-06

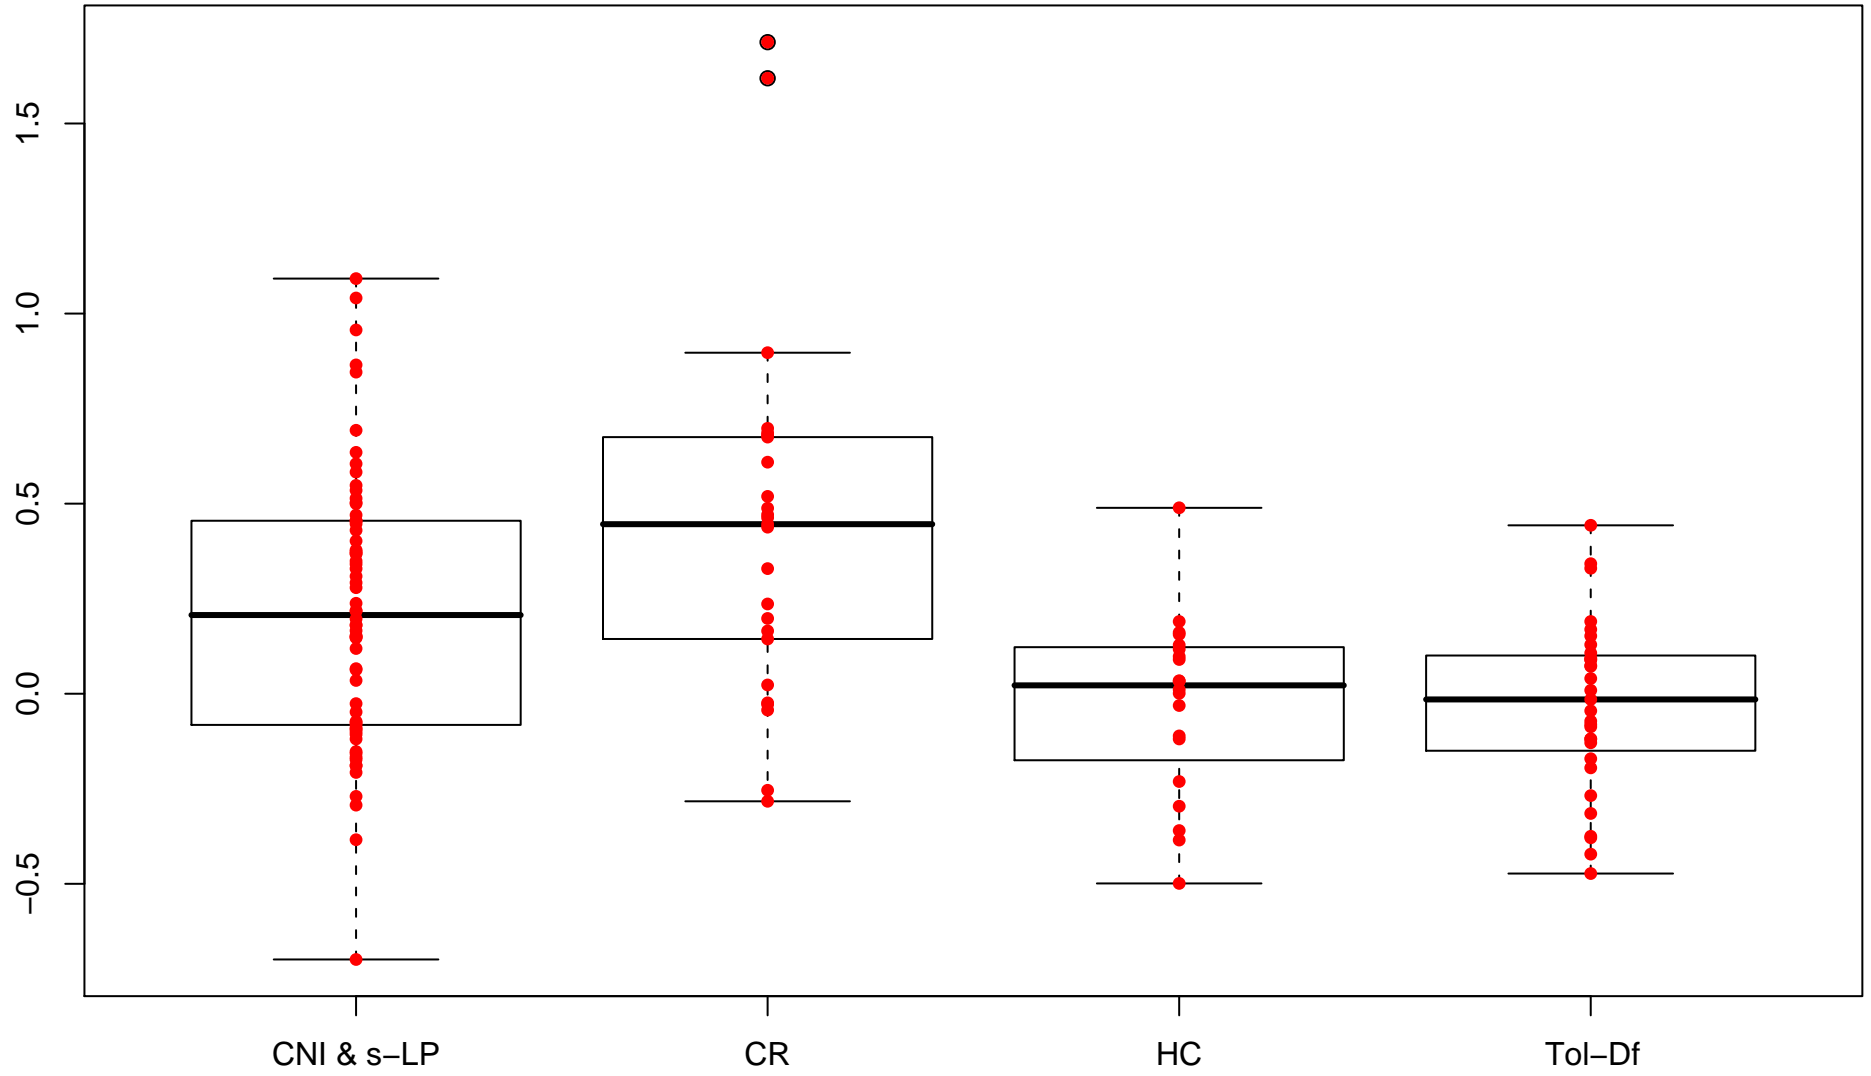

Rank 186 : ELA2  
6.996e-06

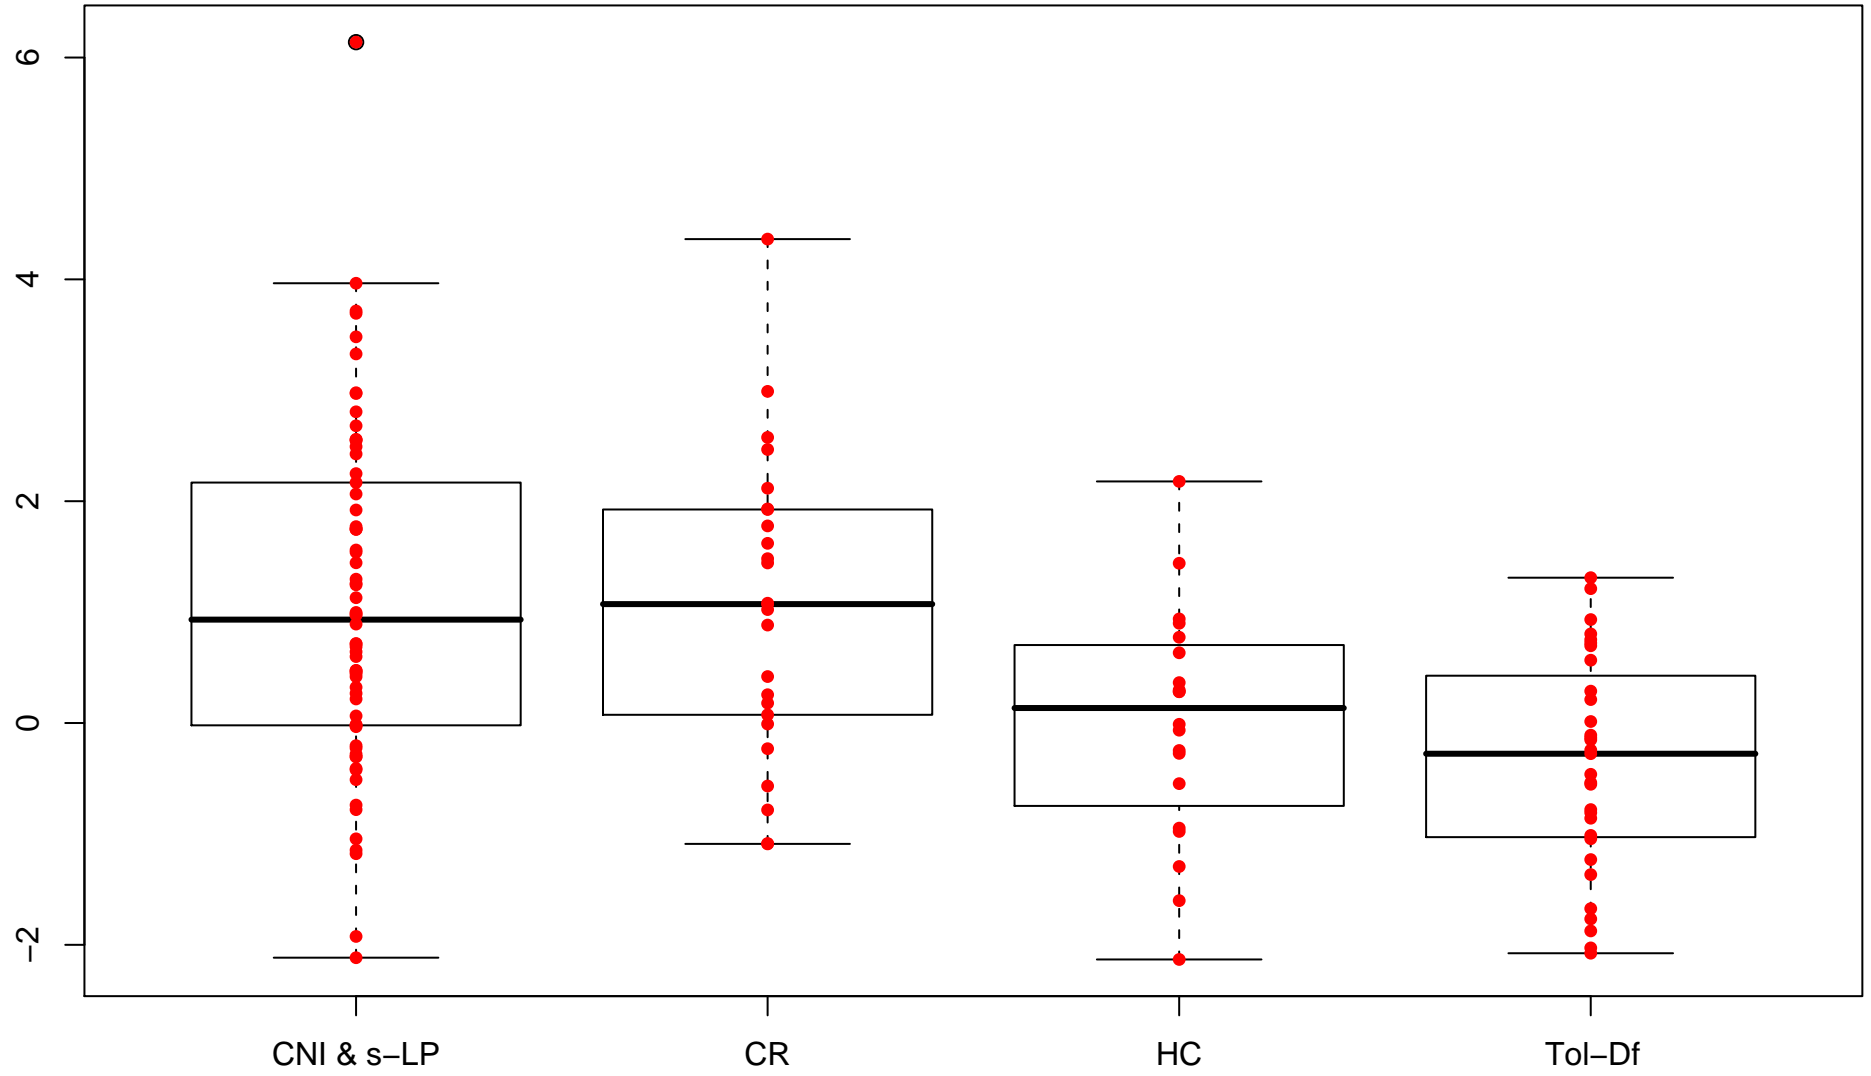

Rank 187 : DENND1A  
7.033e-06

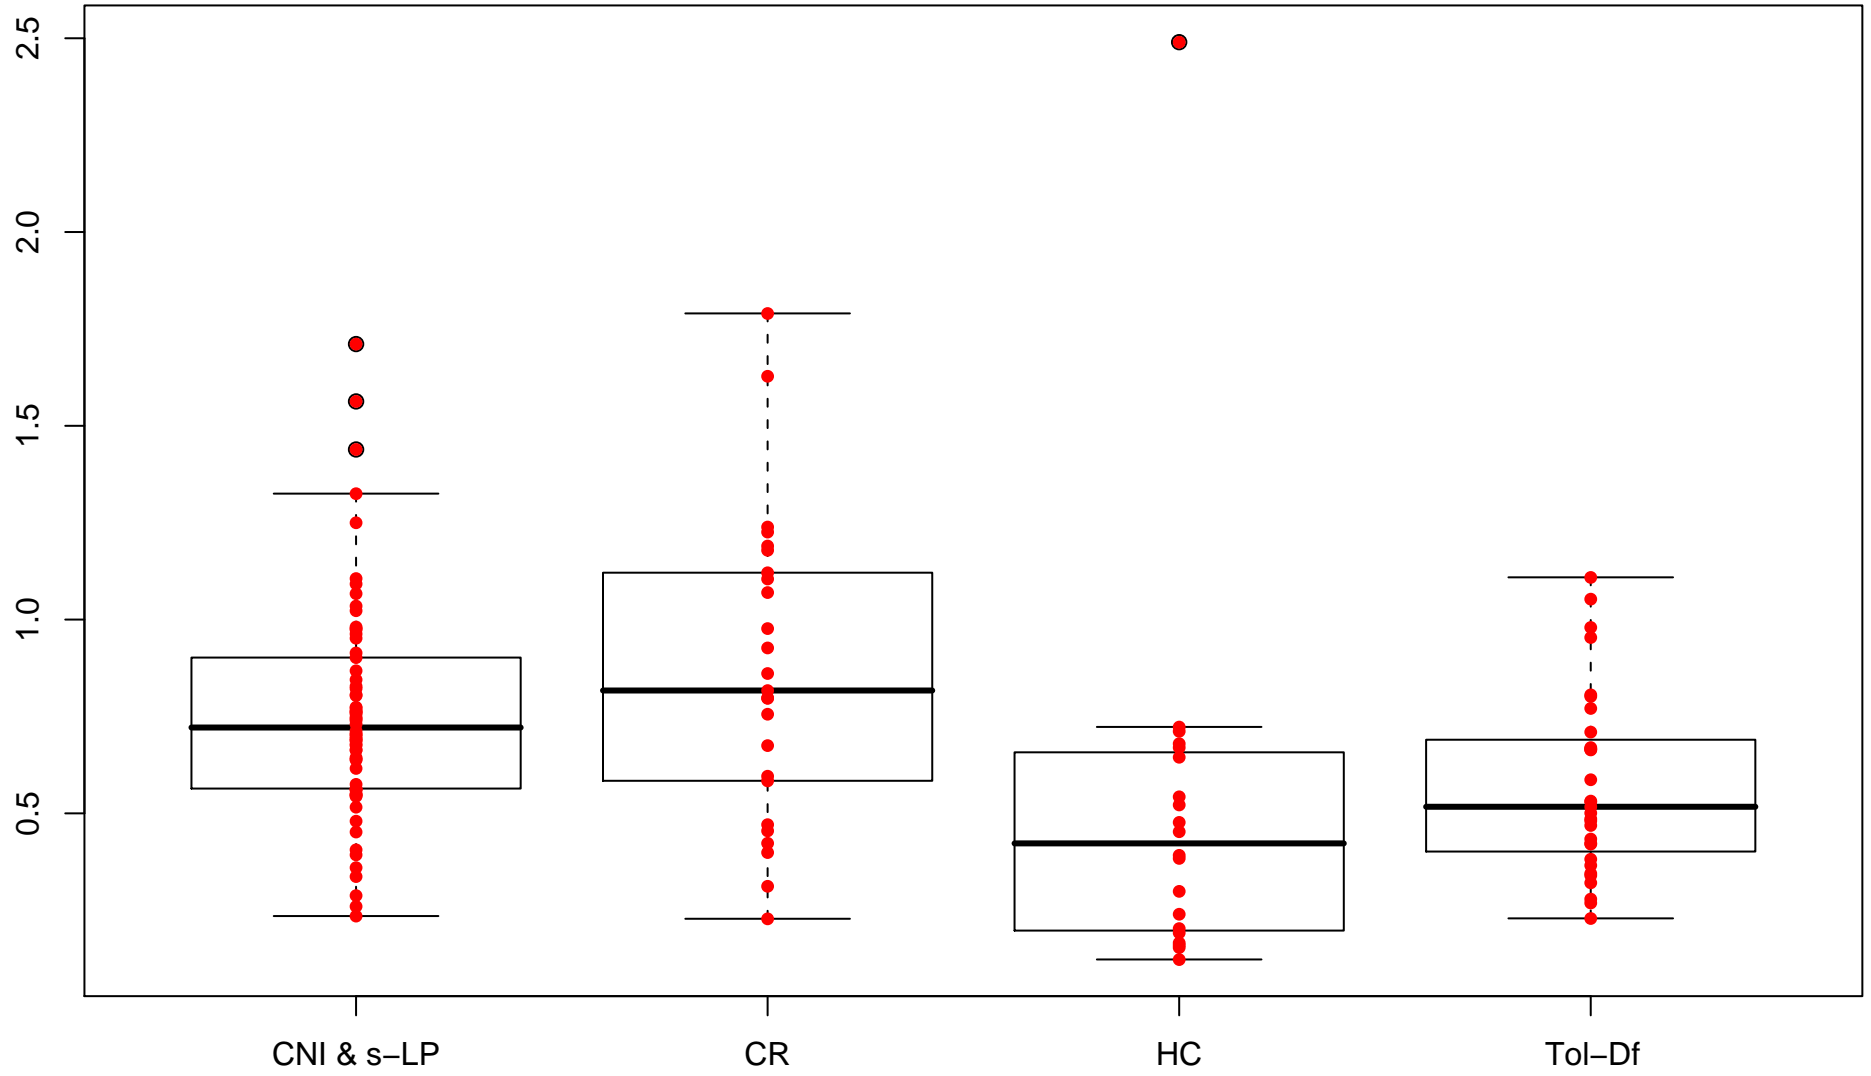

Rank 188 : CELSR1  
7.052e-06

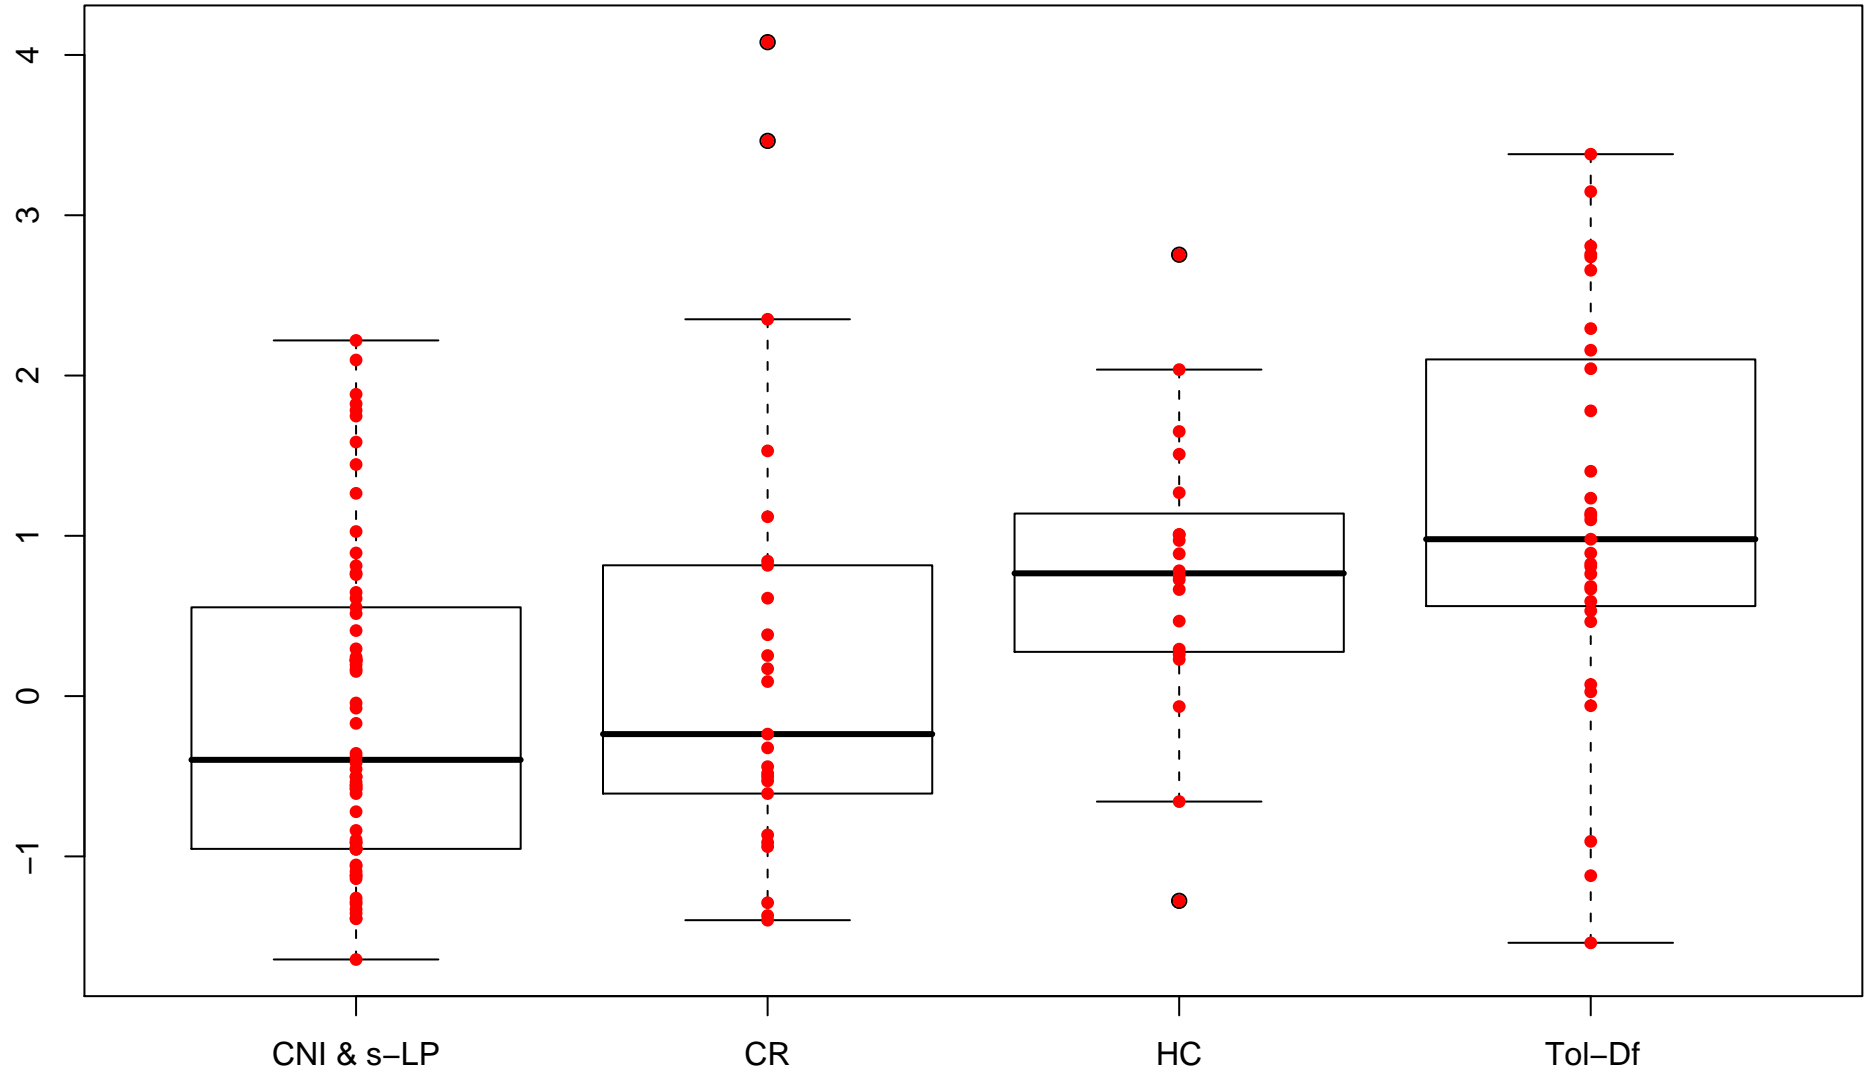

Rank 189 : DDC  
7.148e-06

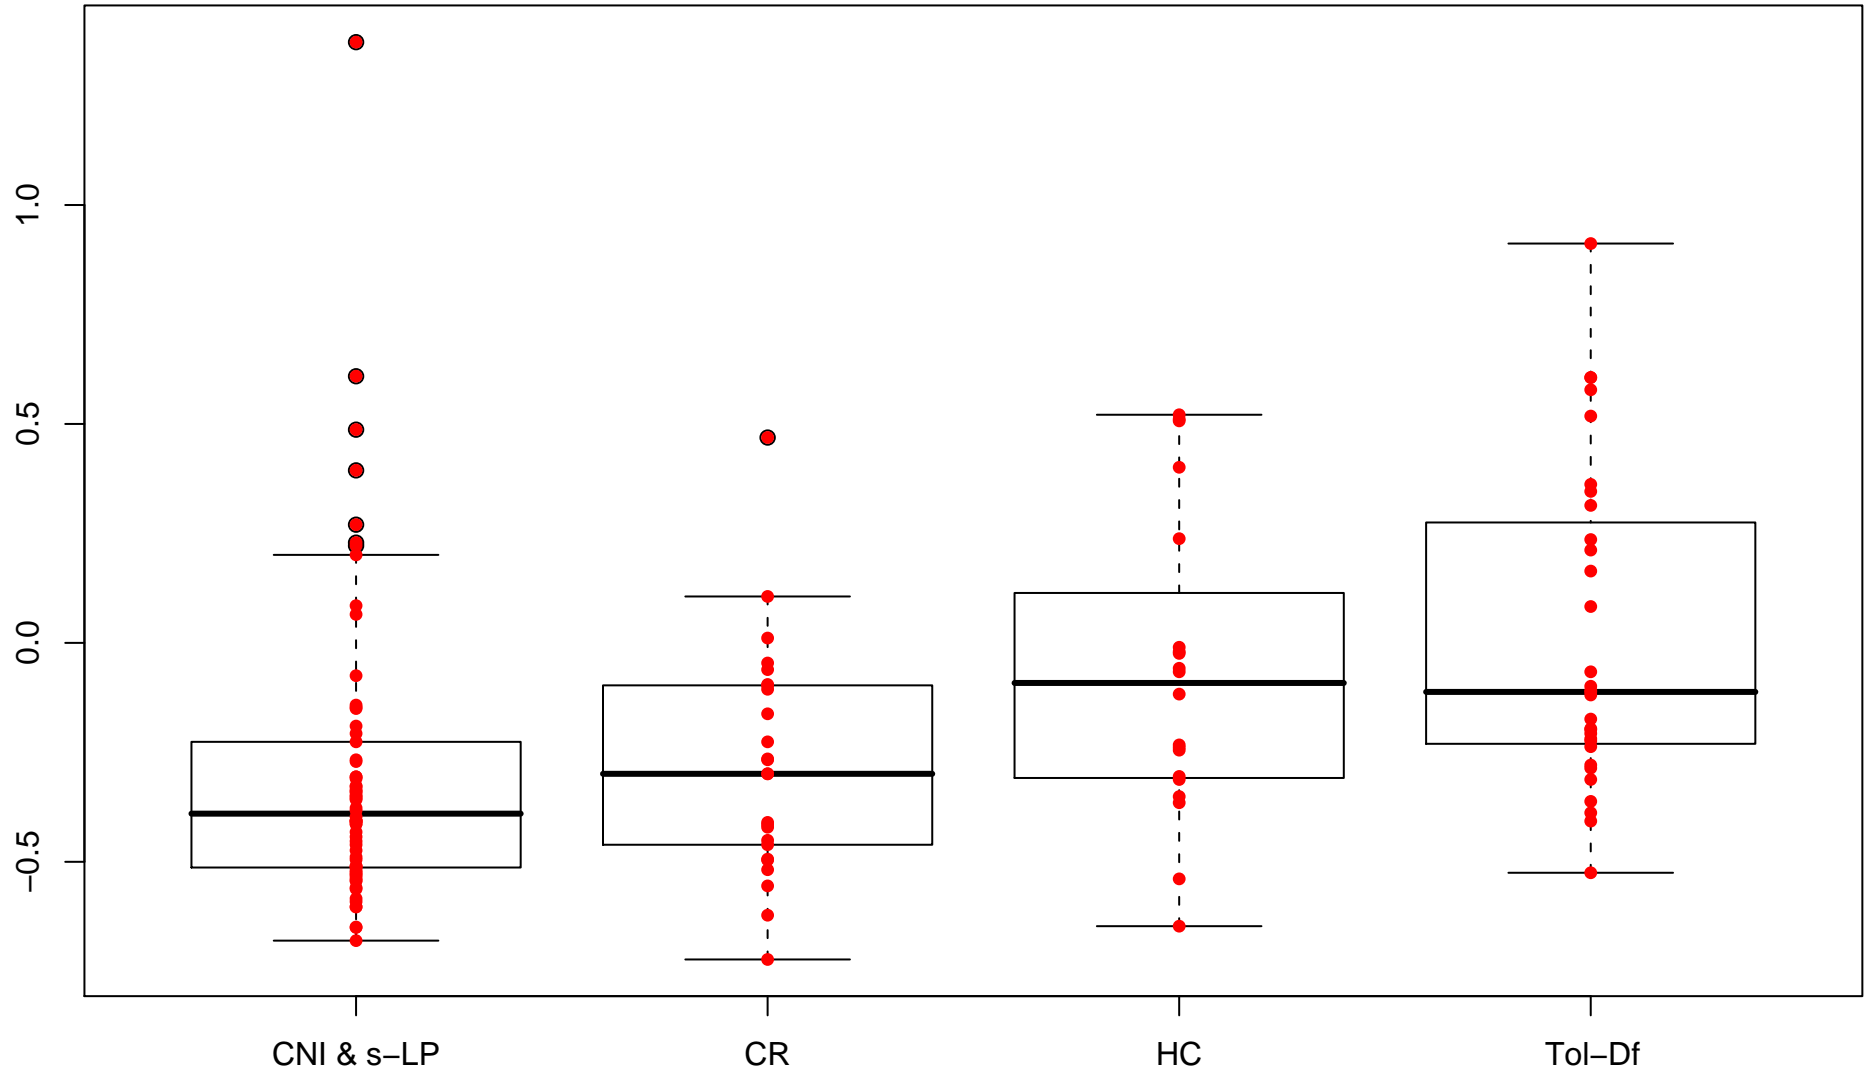

Rank 190 : RPL35;LOC390876;LOC440737;HCG\_1983332  
7.19e-06

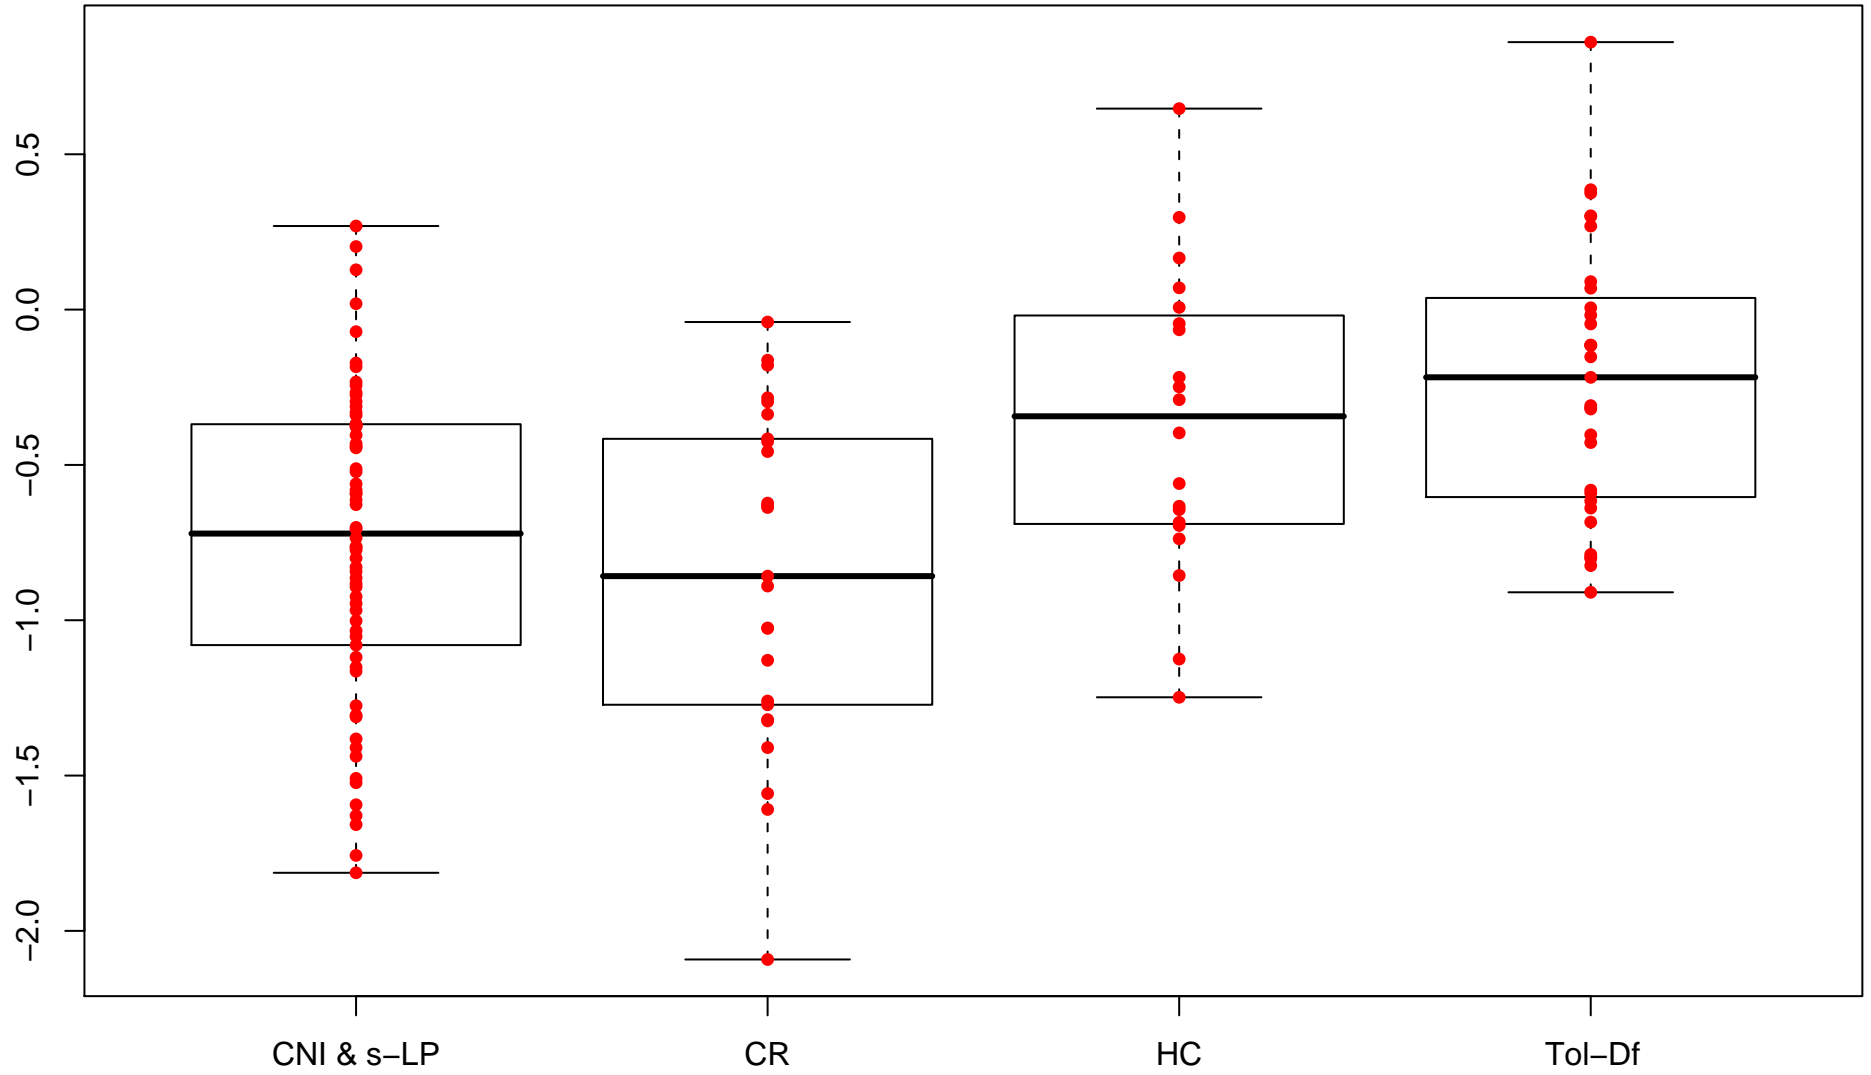

Rank 191 : MAN1A1  
7.389e-06

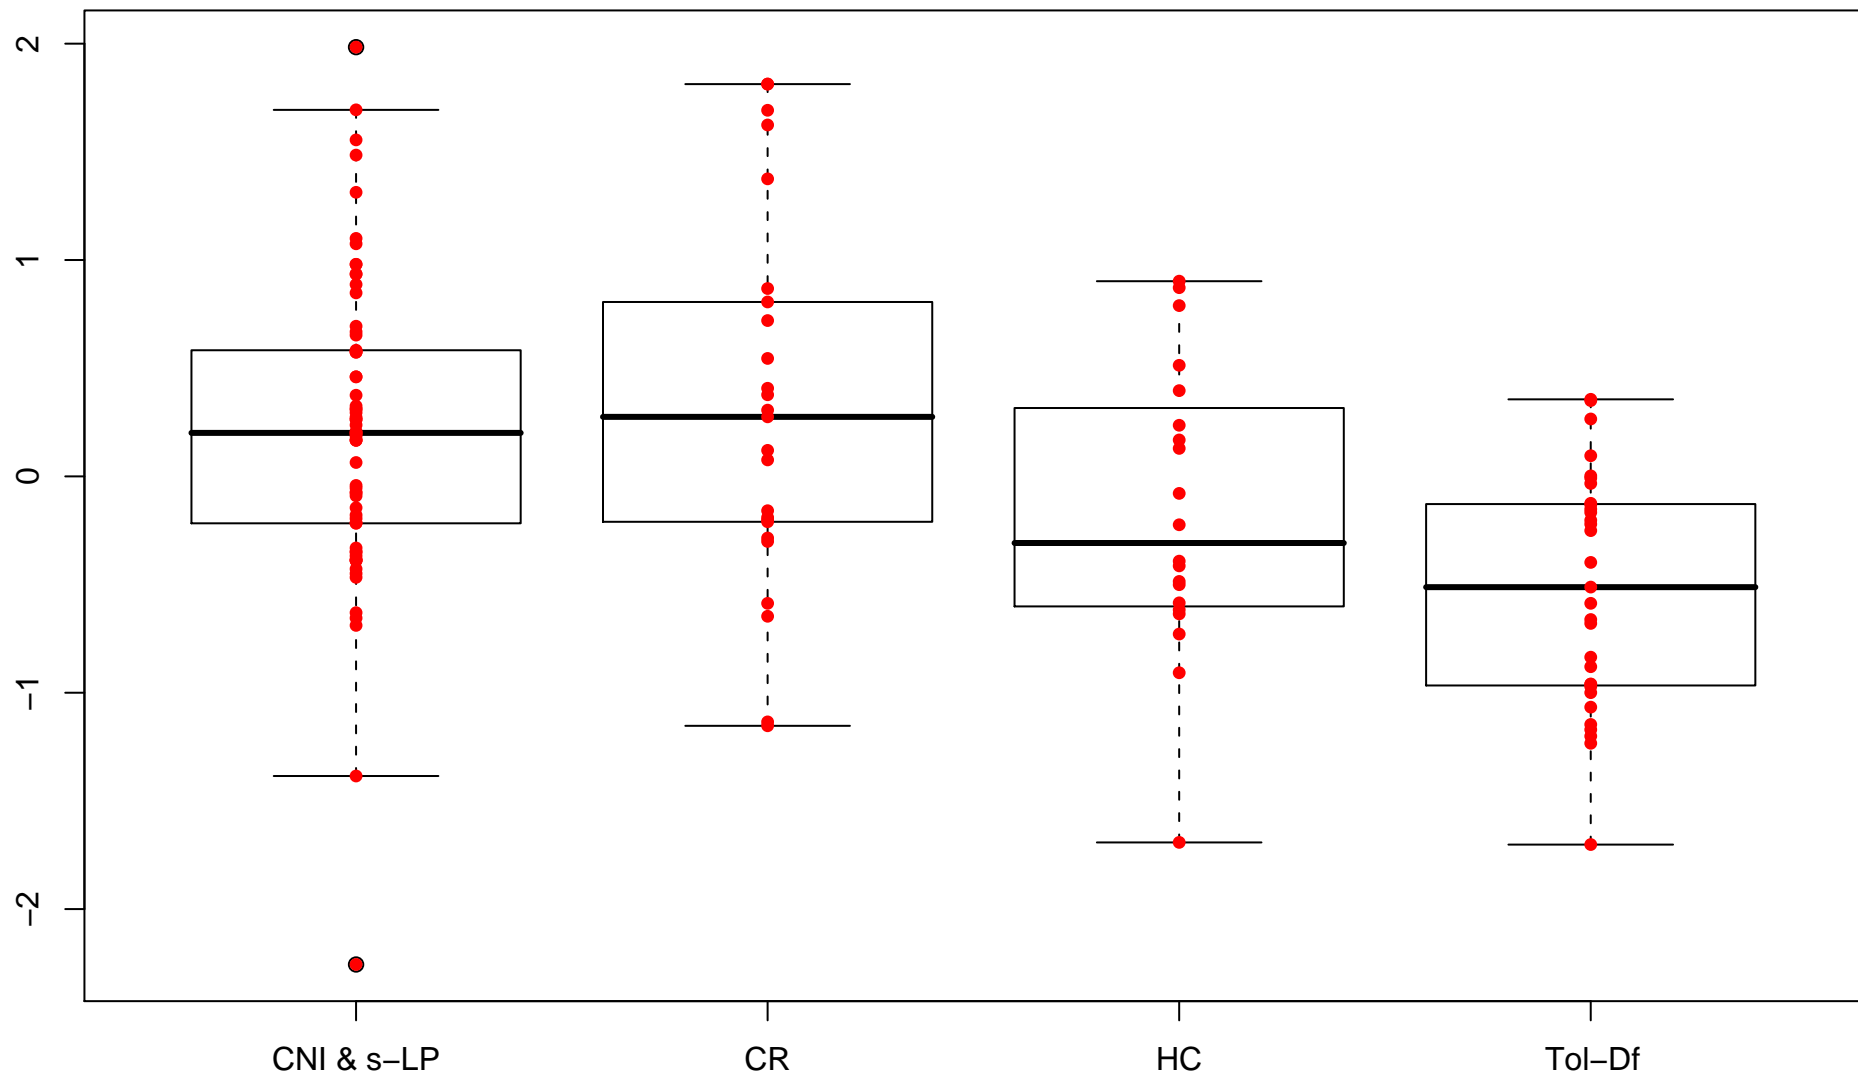



Rank 192 : COL17A1  
7.398e-06

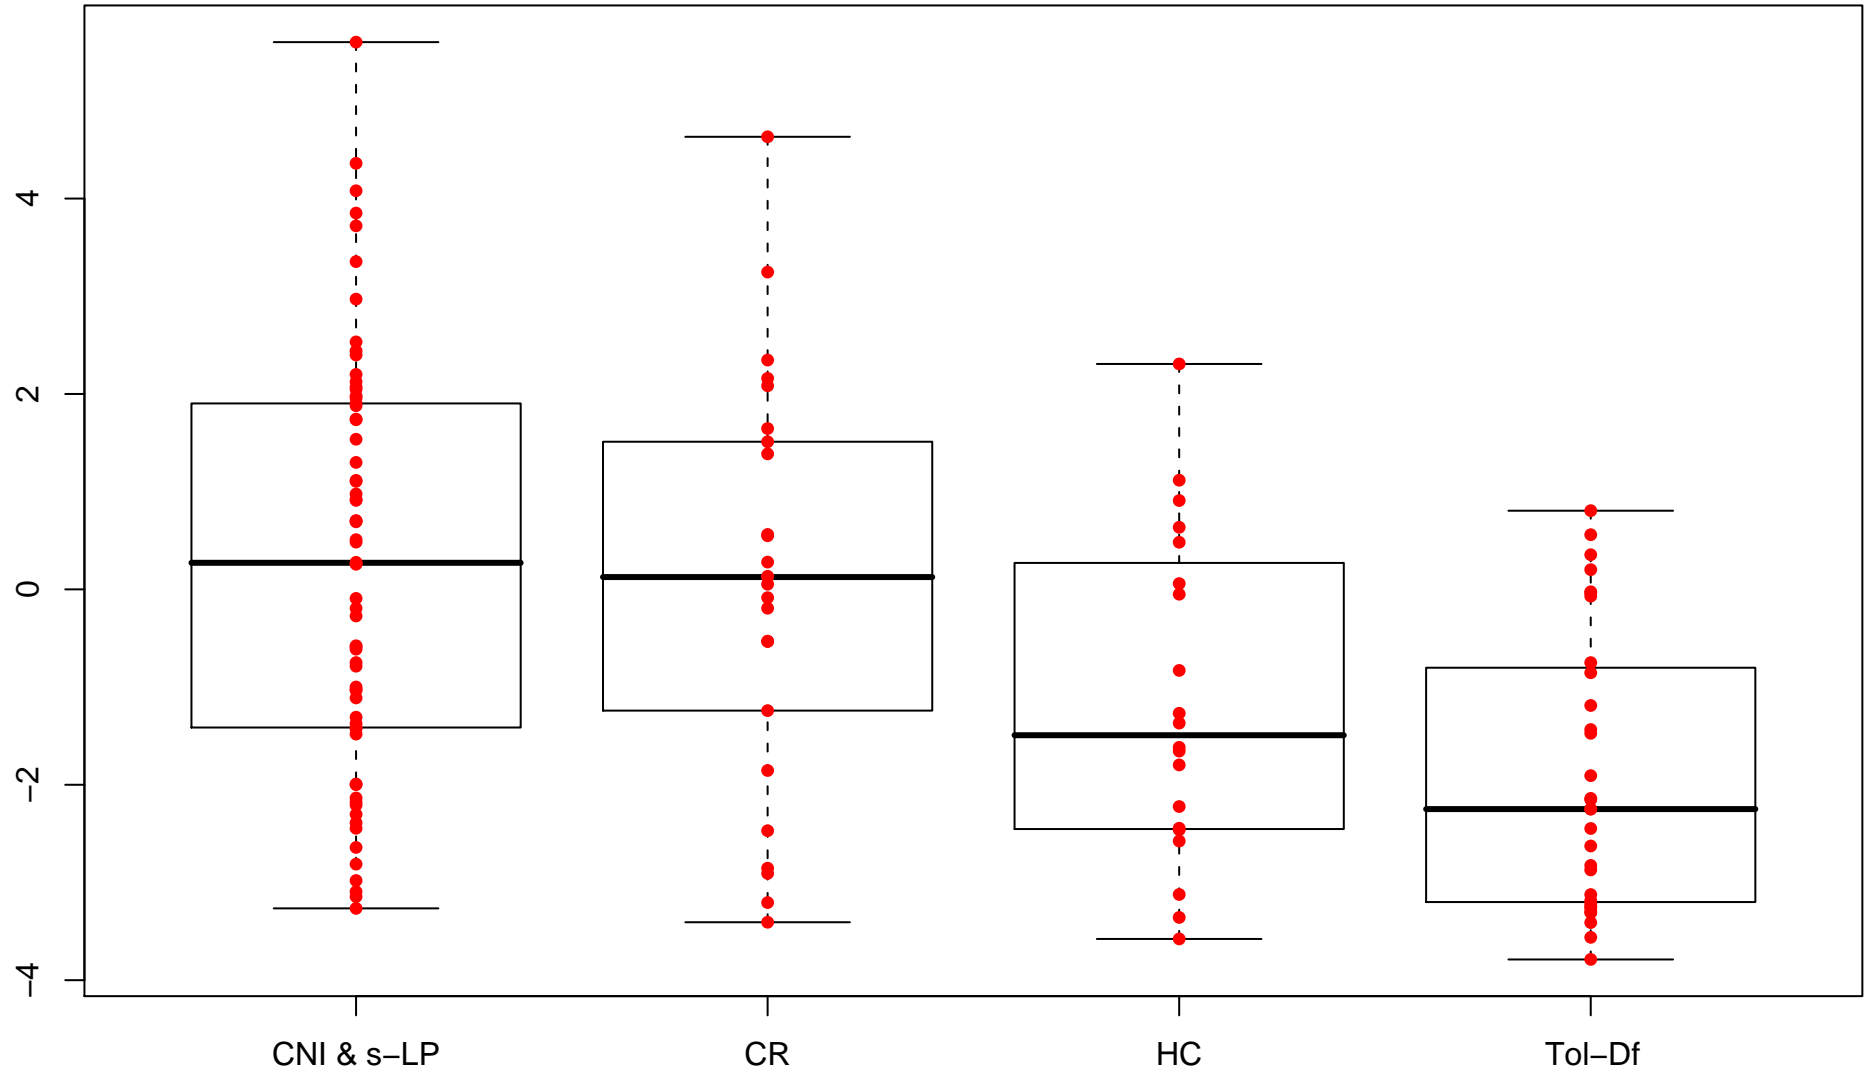

Rank 193 : HSPA8  
7.4e-06

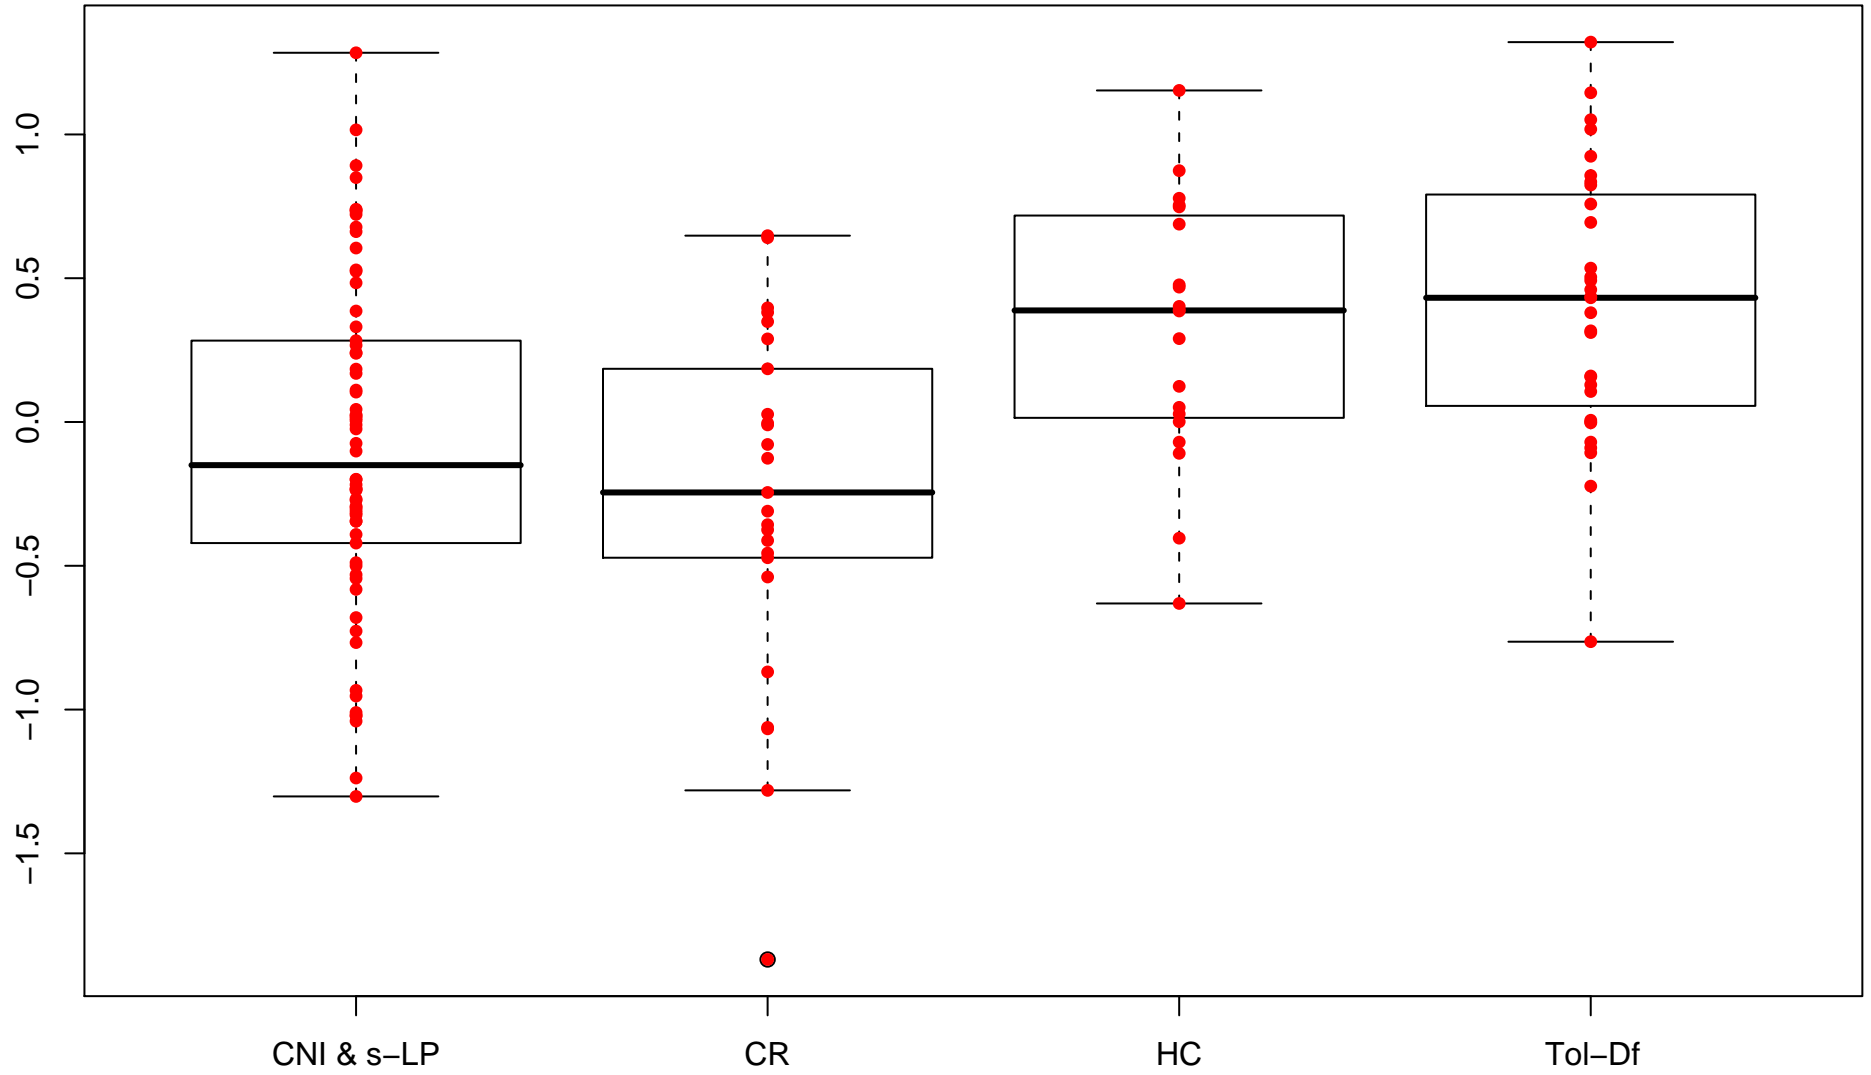

Rank 194 : CXCL9  
7.521e-06

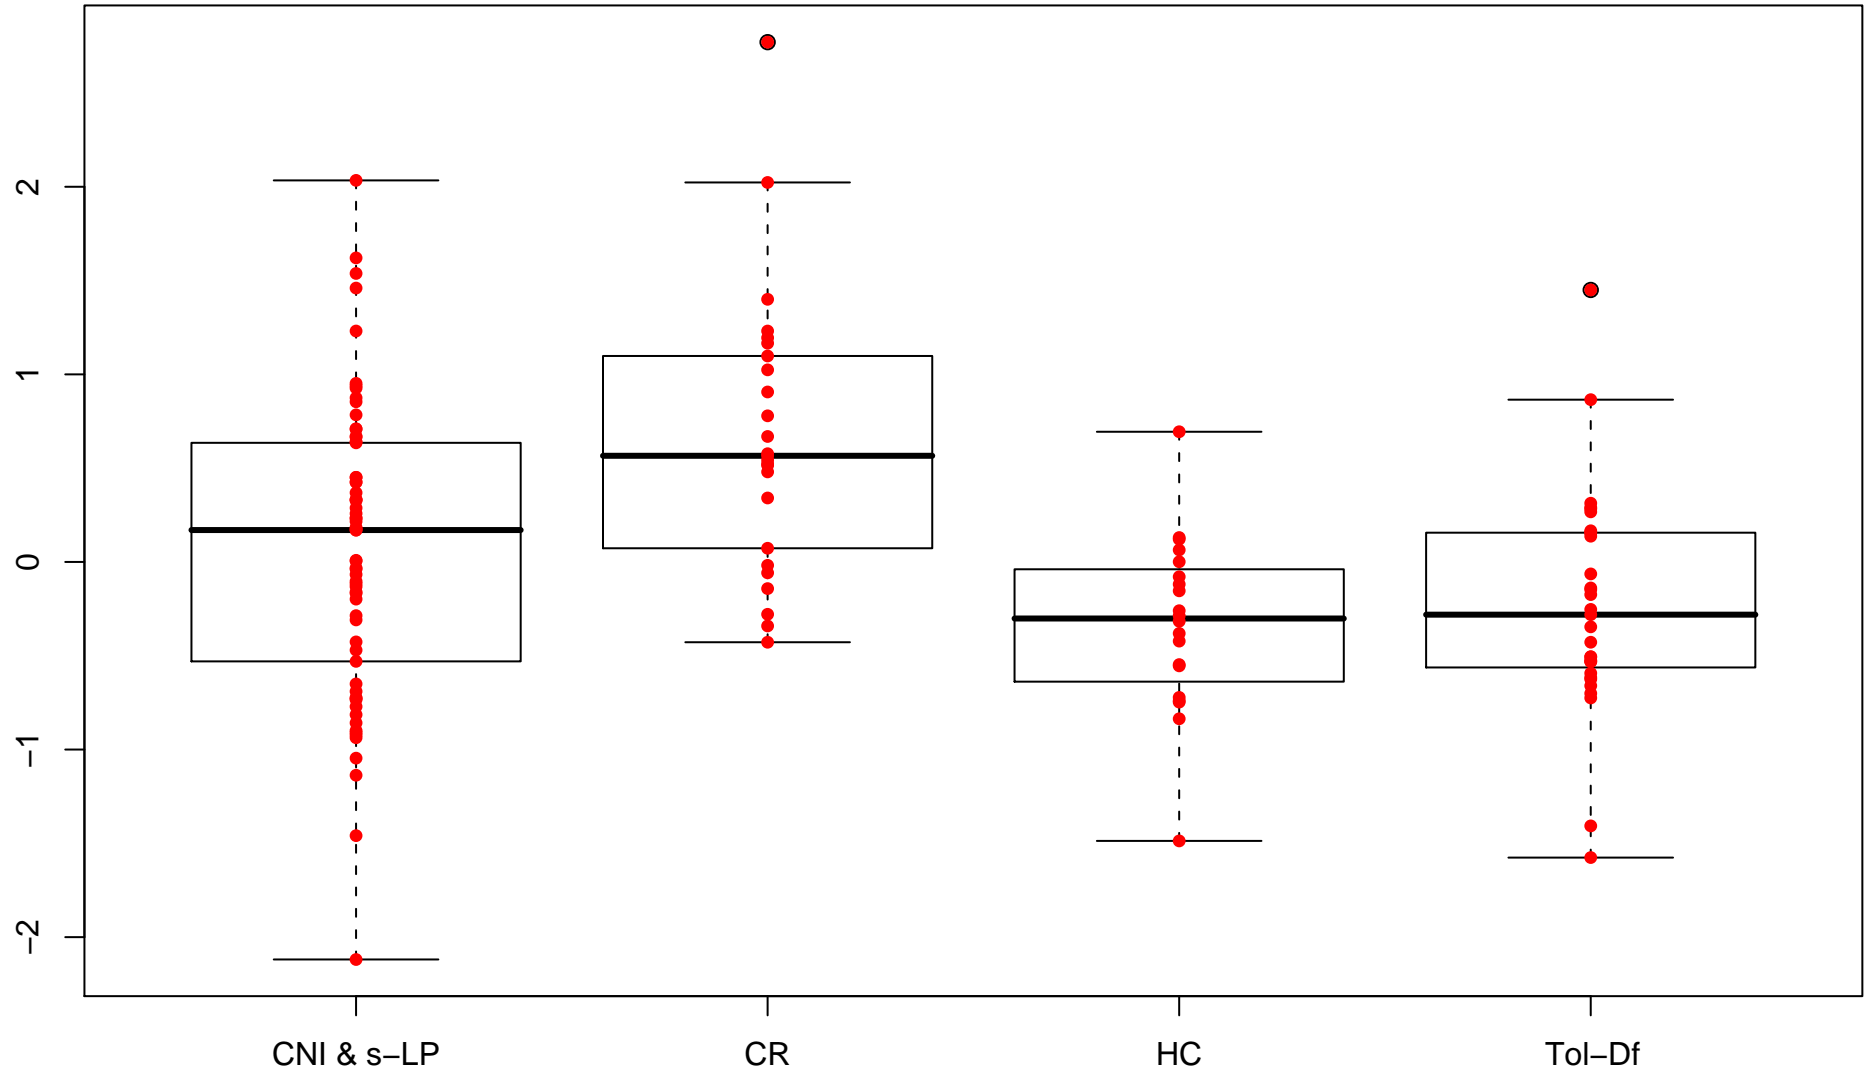

Rank 195 : FADS3  
7.537e-06

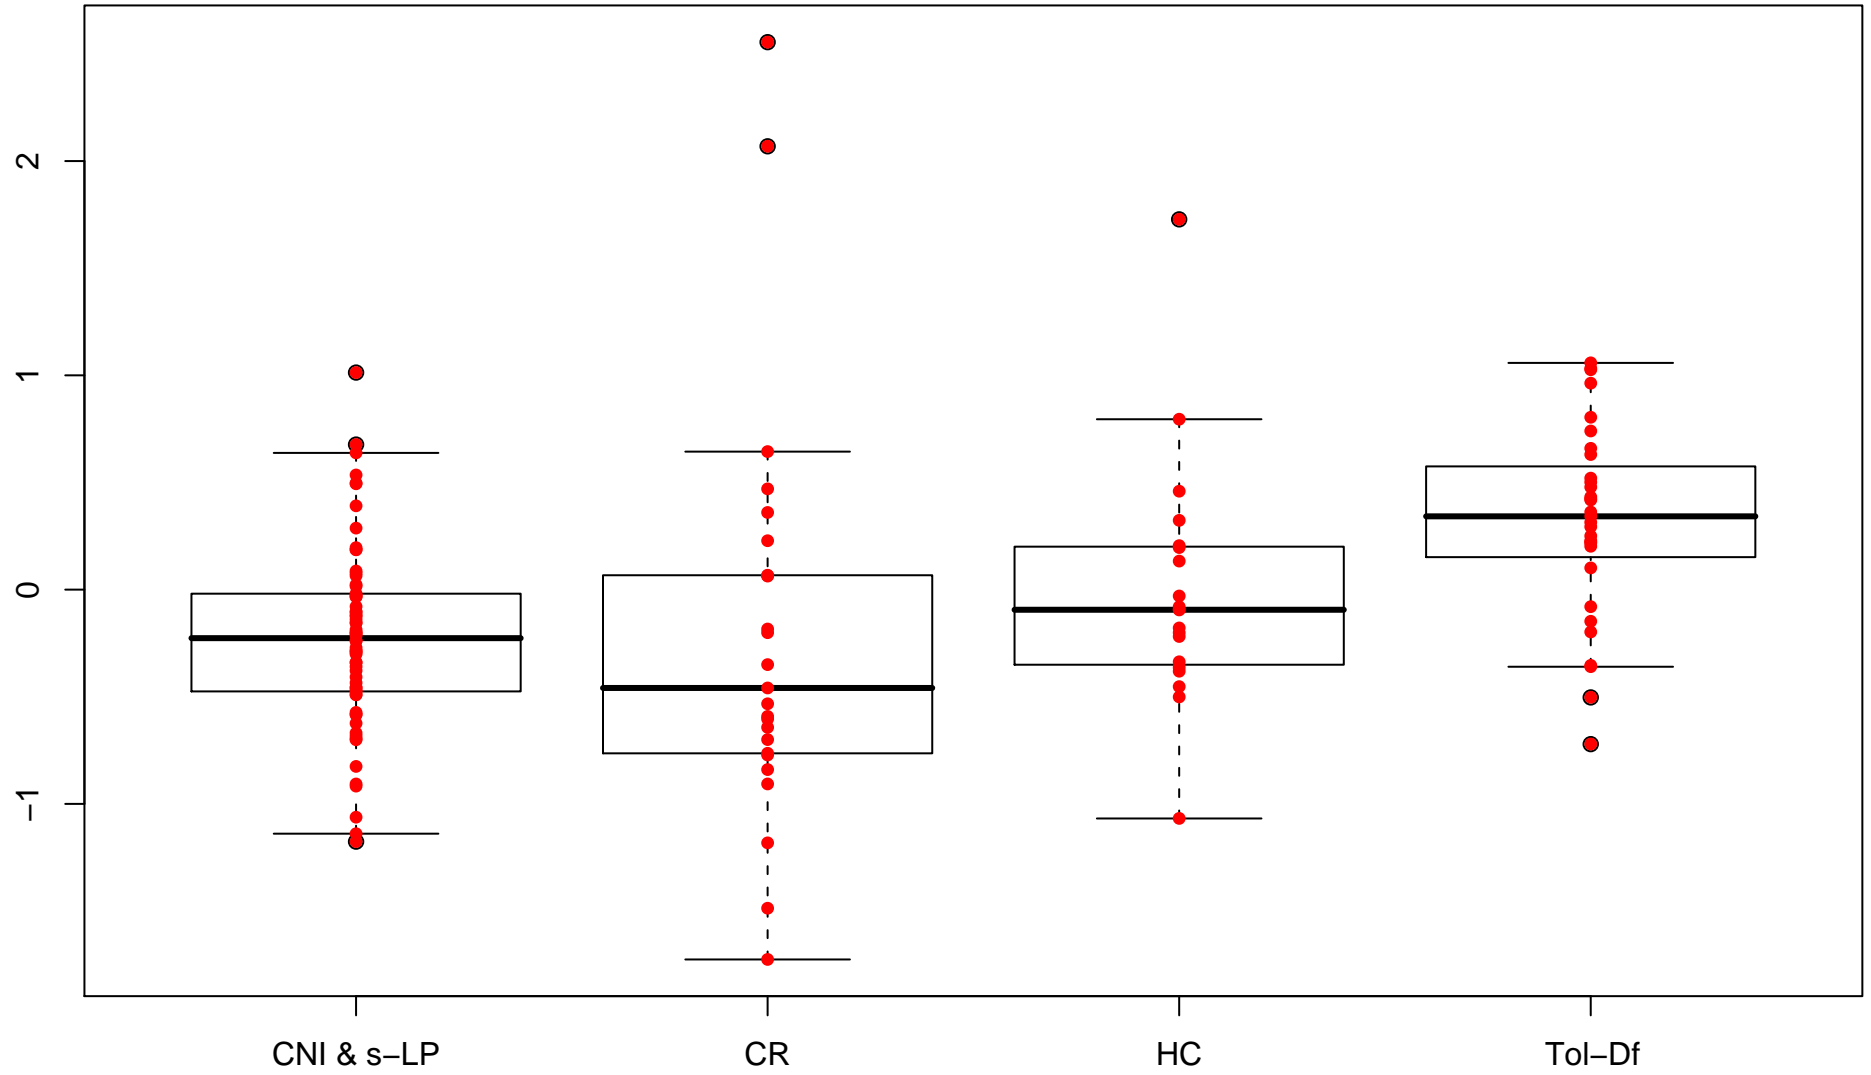

Rank 196 : PDHX  
7.559e-06

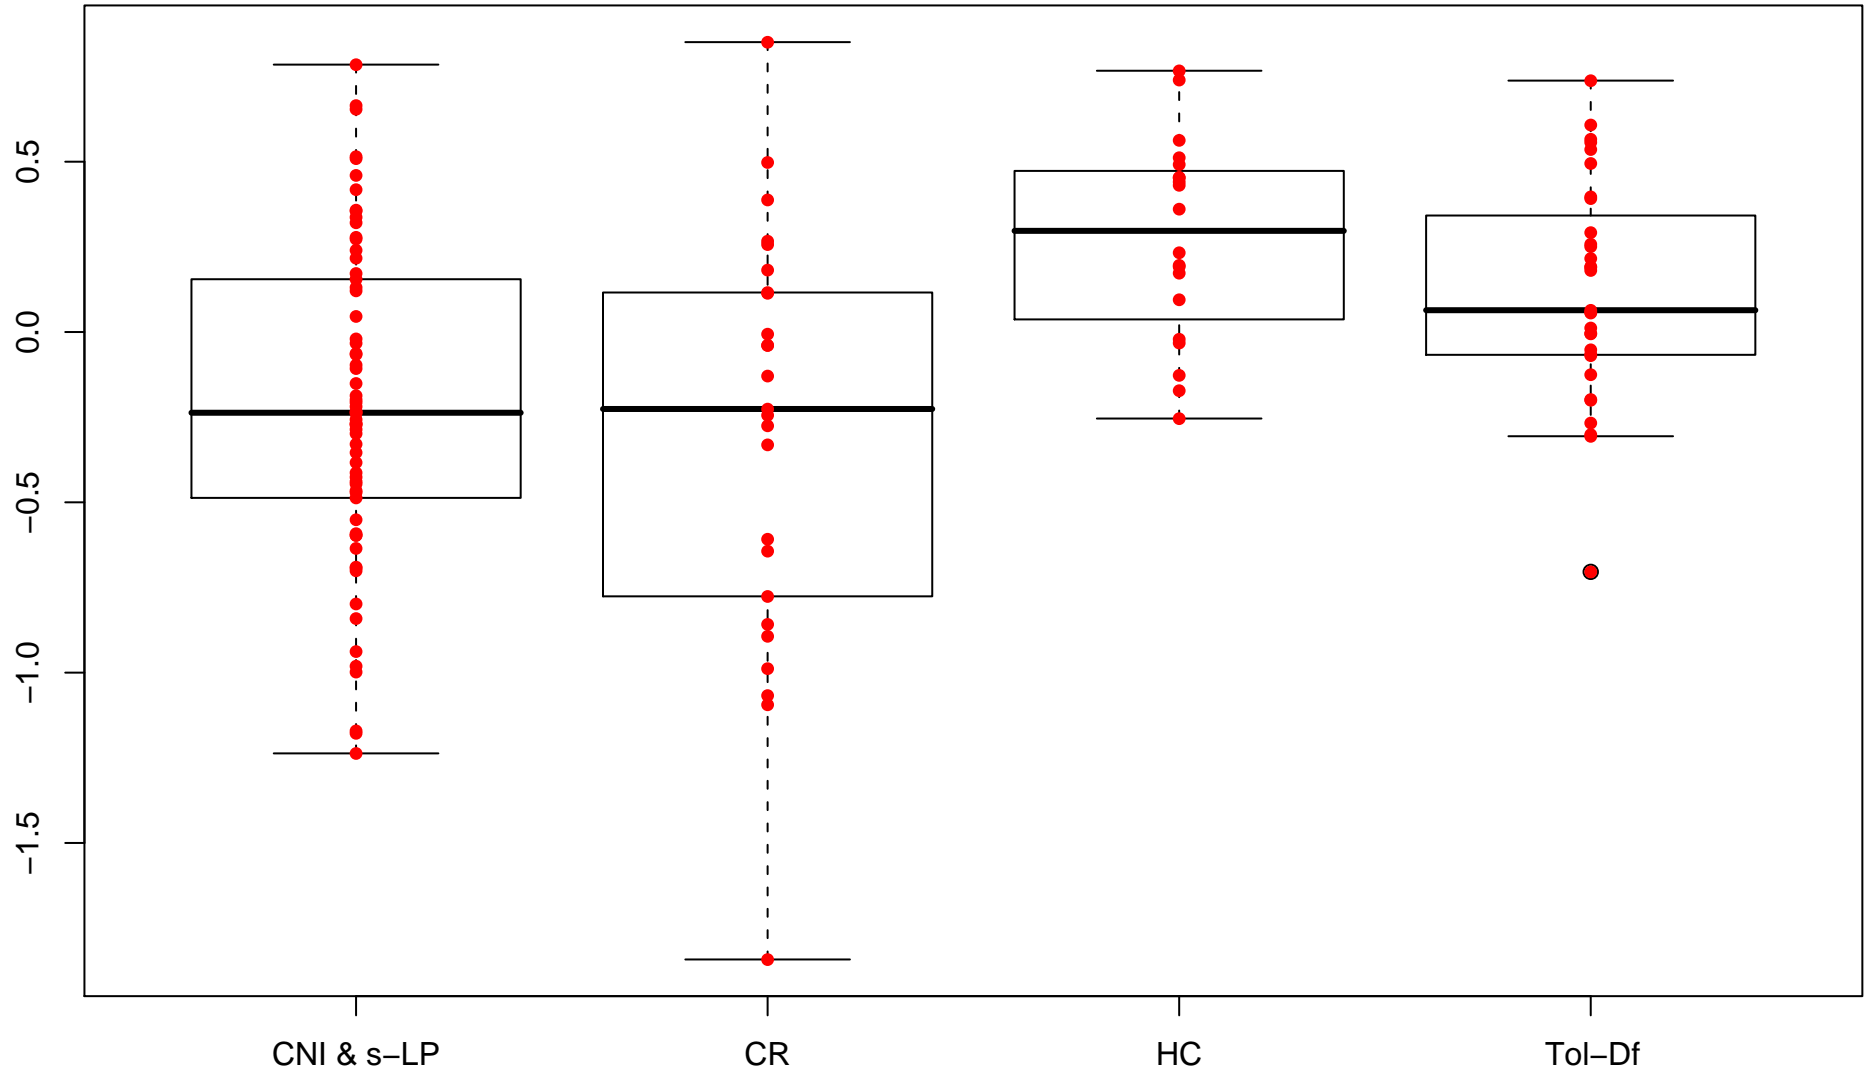

Rank 197 : C12ORF57  
8.04e-06

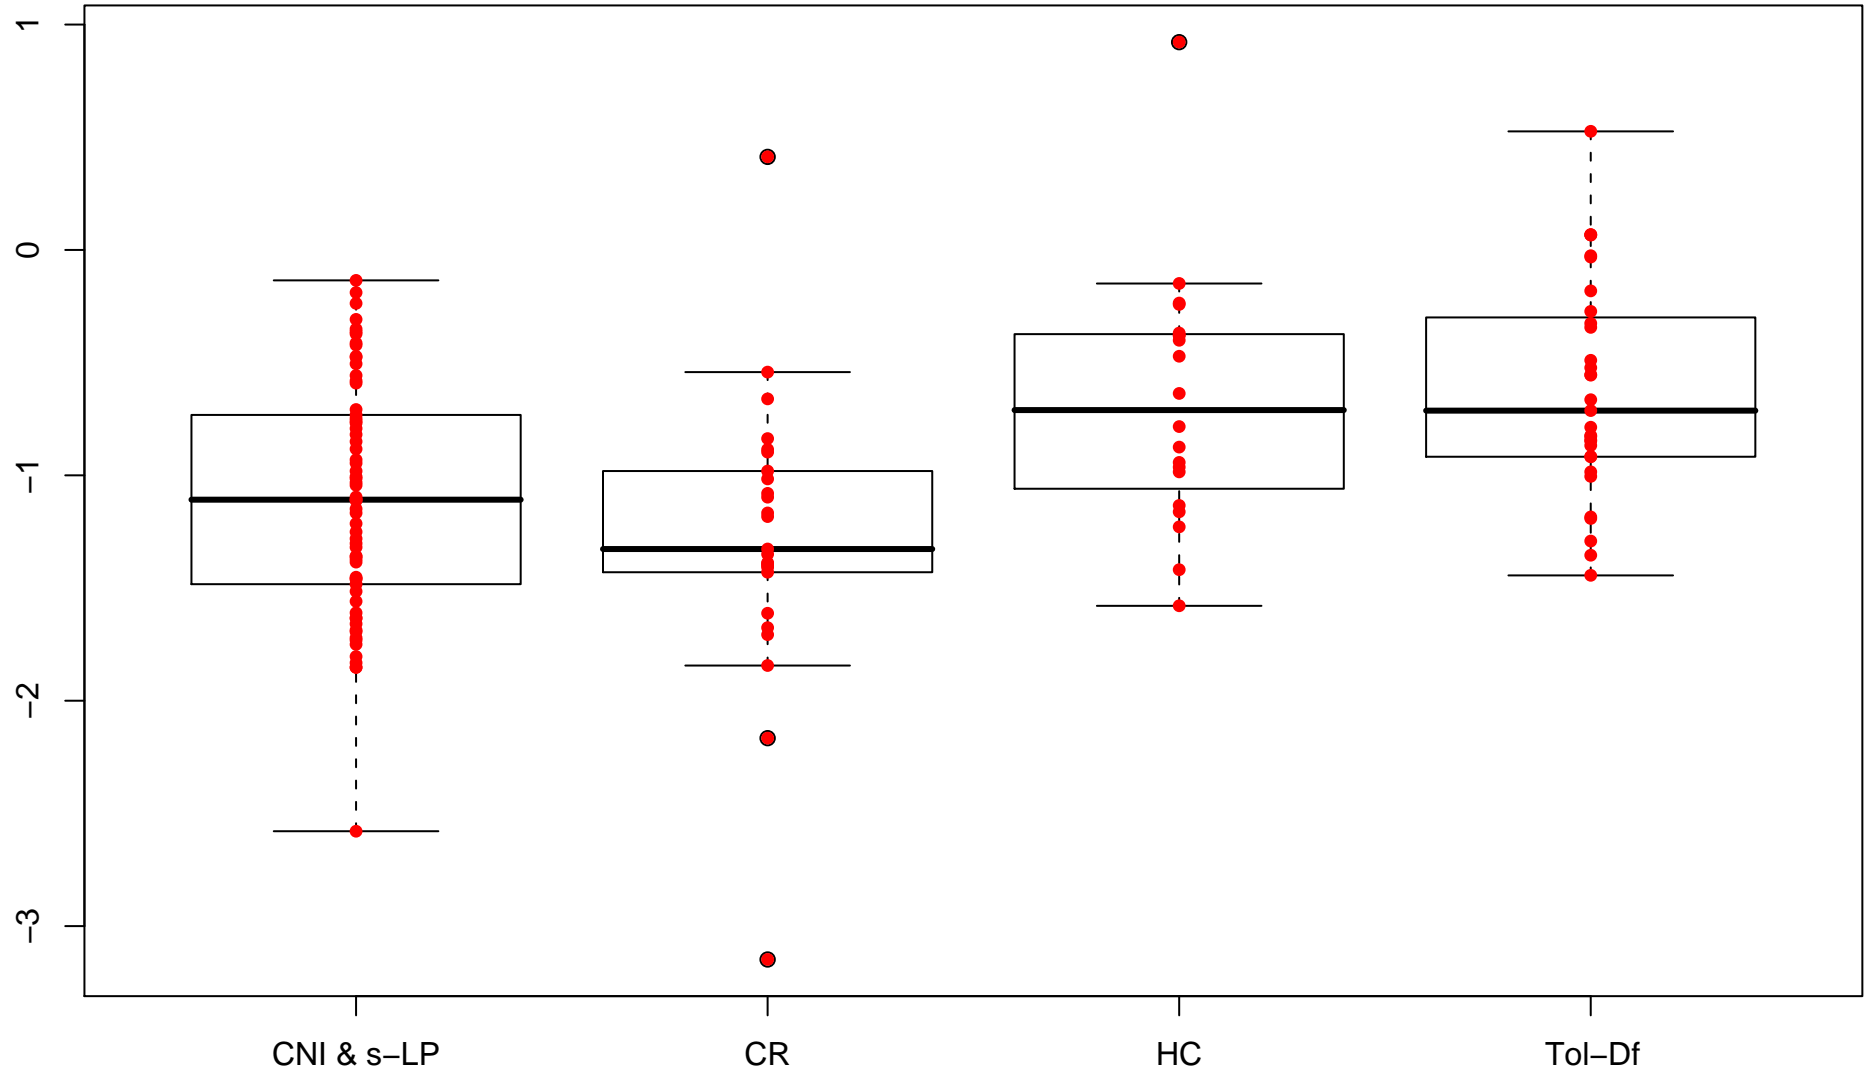

Rank 198 : NFAM1  
8.149e-06

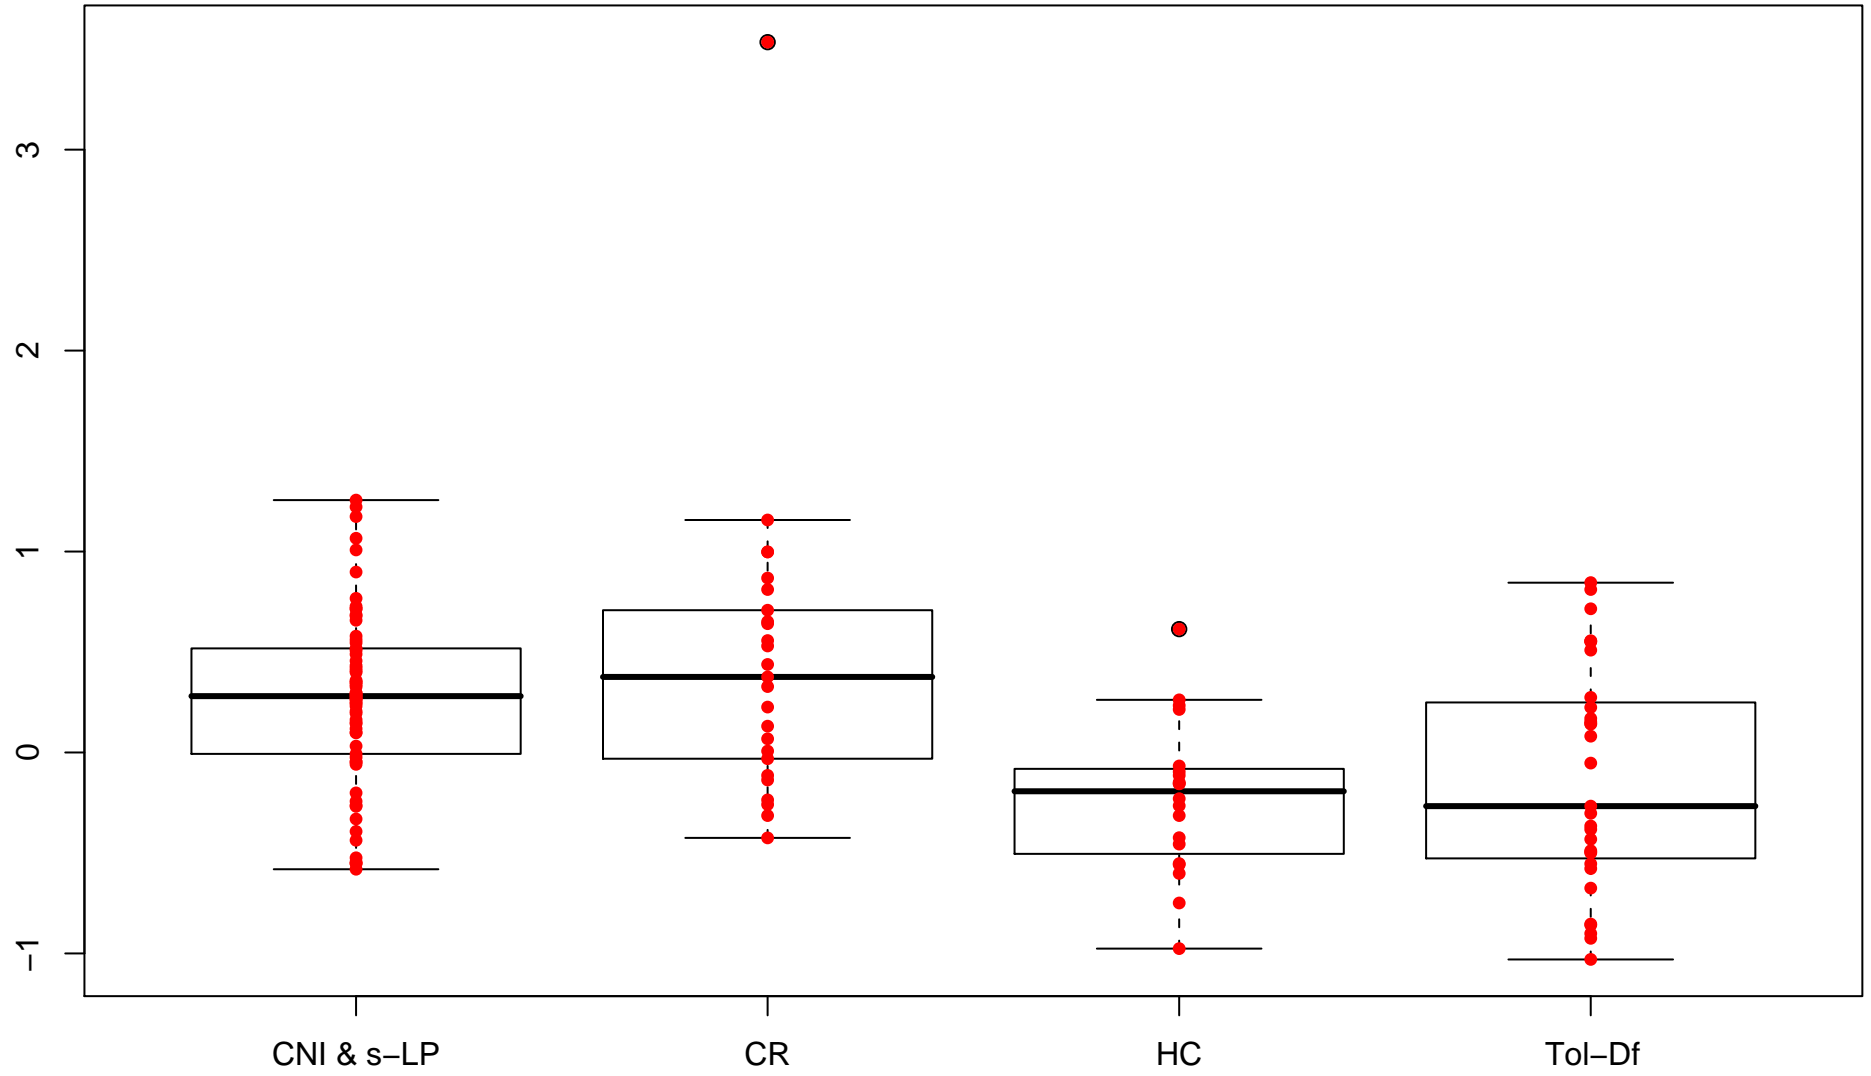

Rank 199 : OXCT1  
8.187e-06

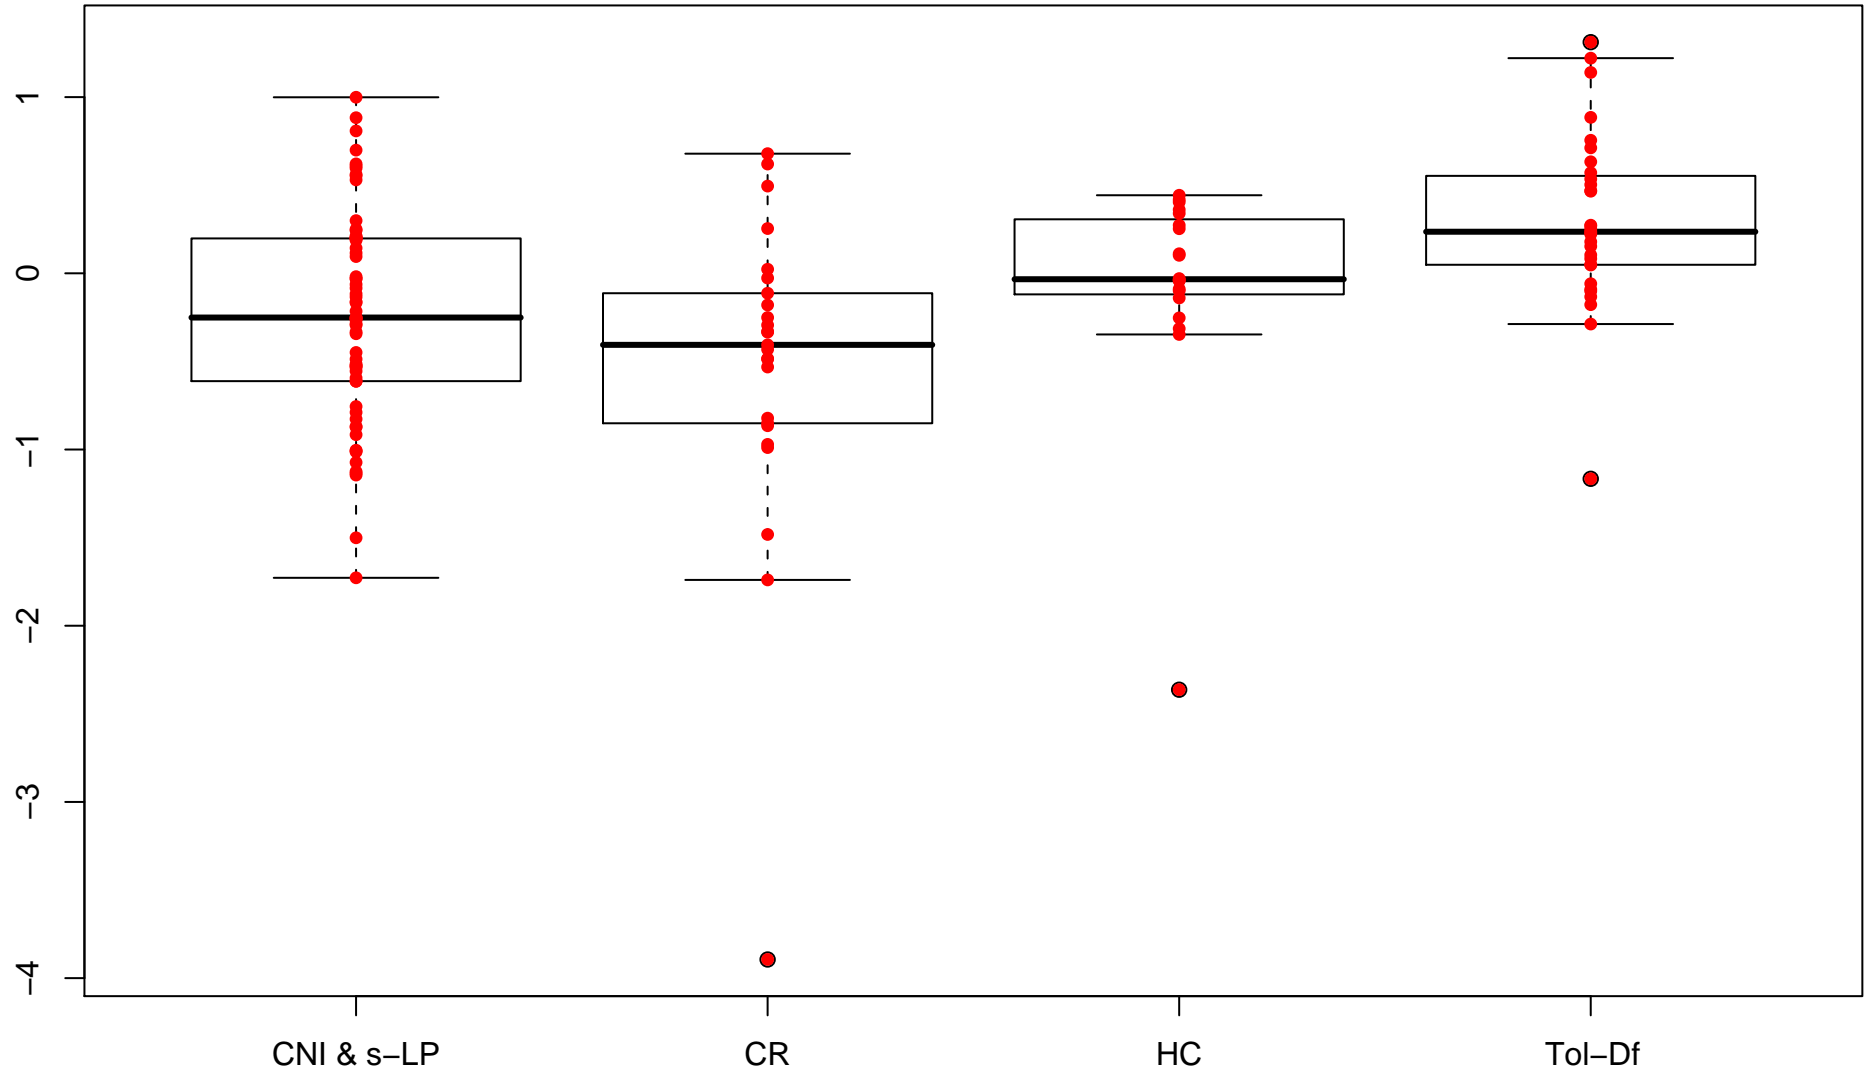



Rank 200 : F7  
8.718e-06

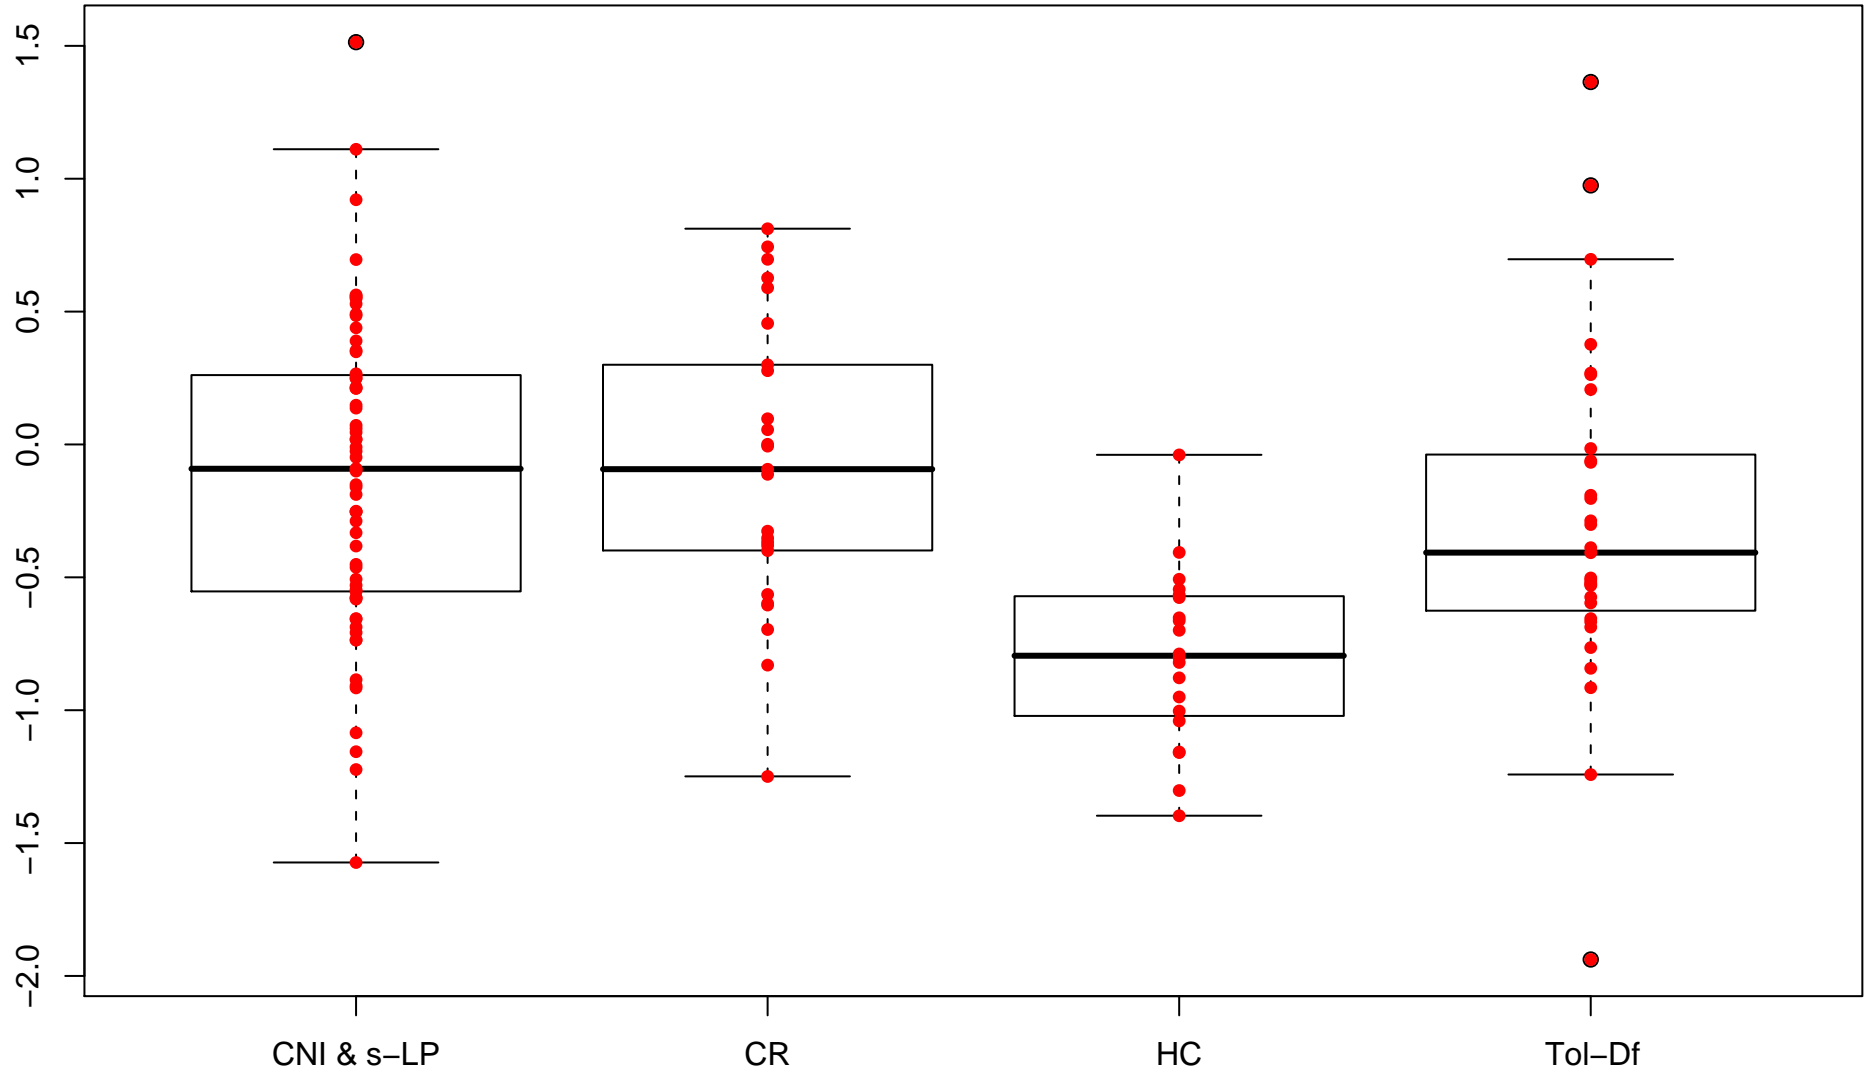

Rank 201 : HRH4  
8.747e-06

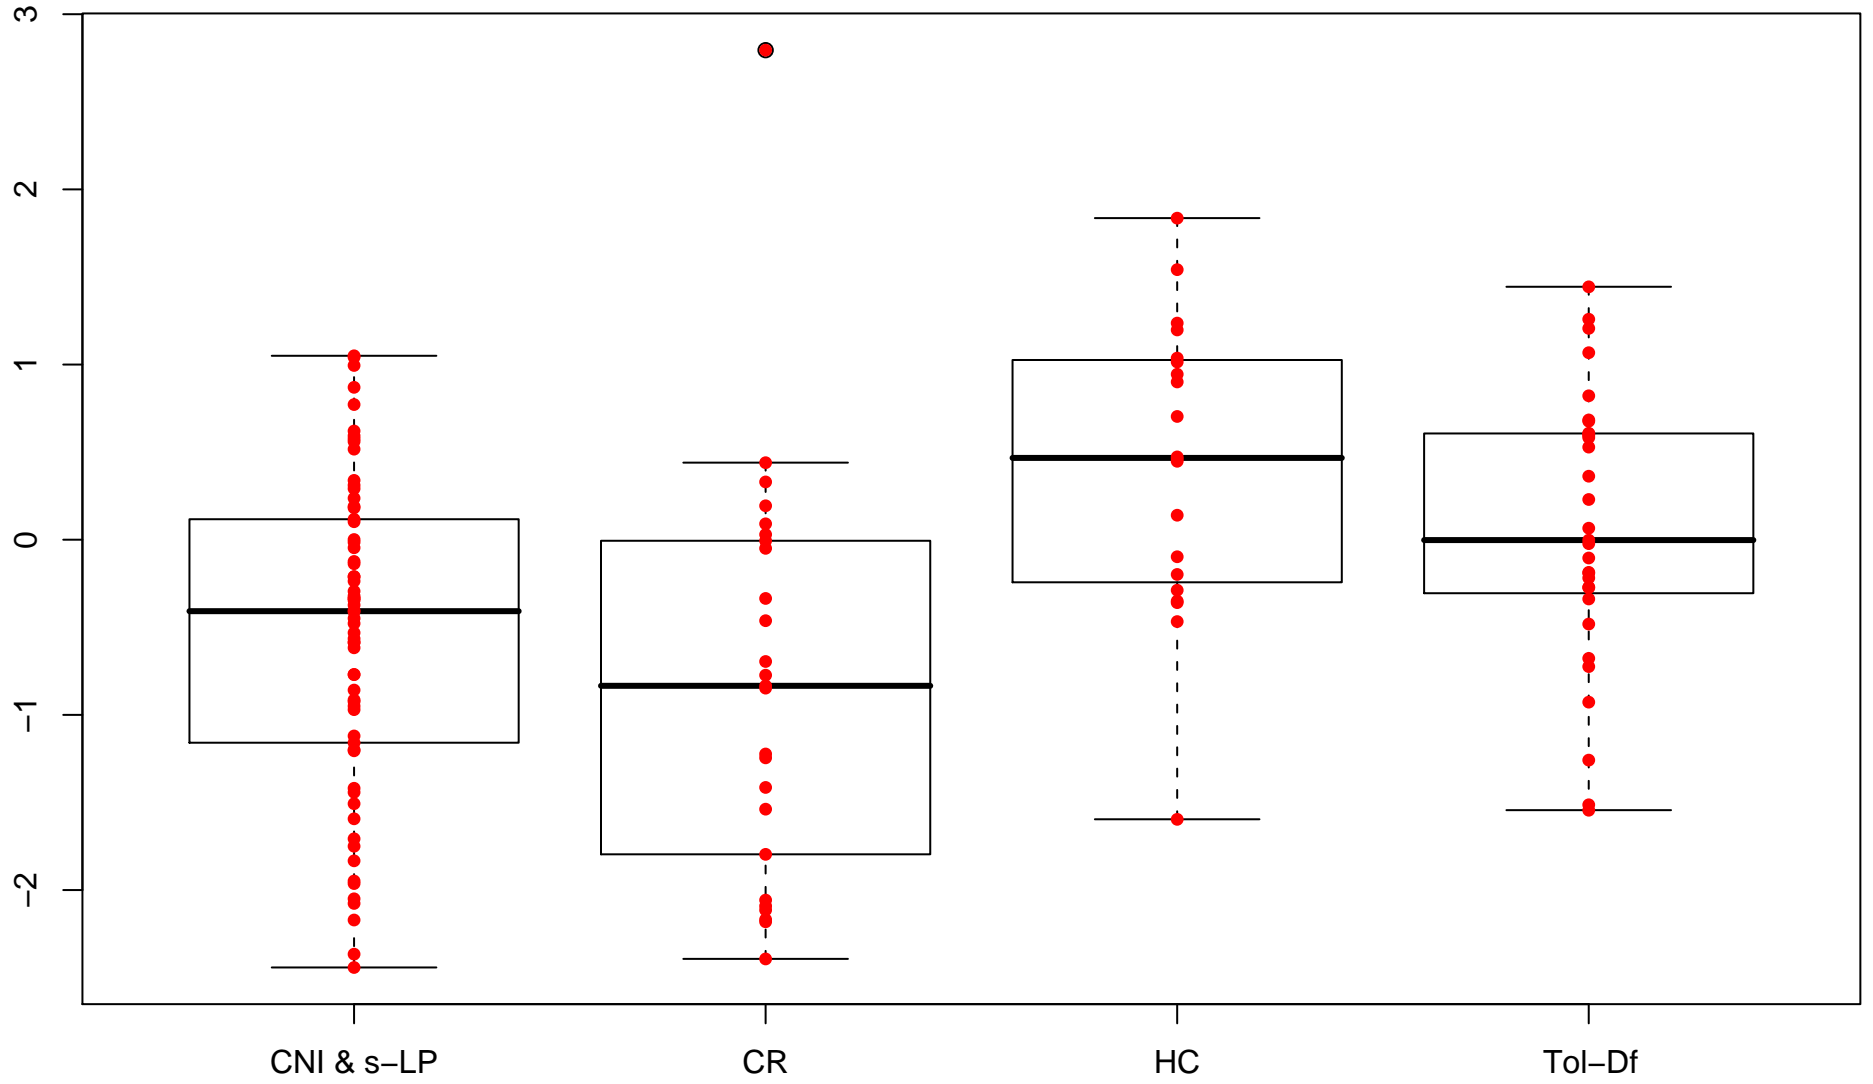

Rank 202 : TNKS  
8.771e-06

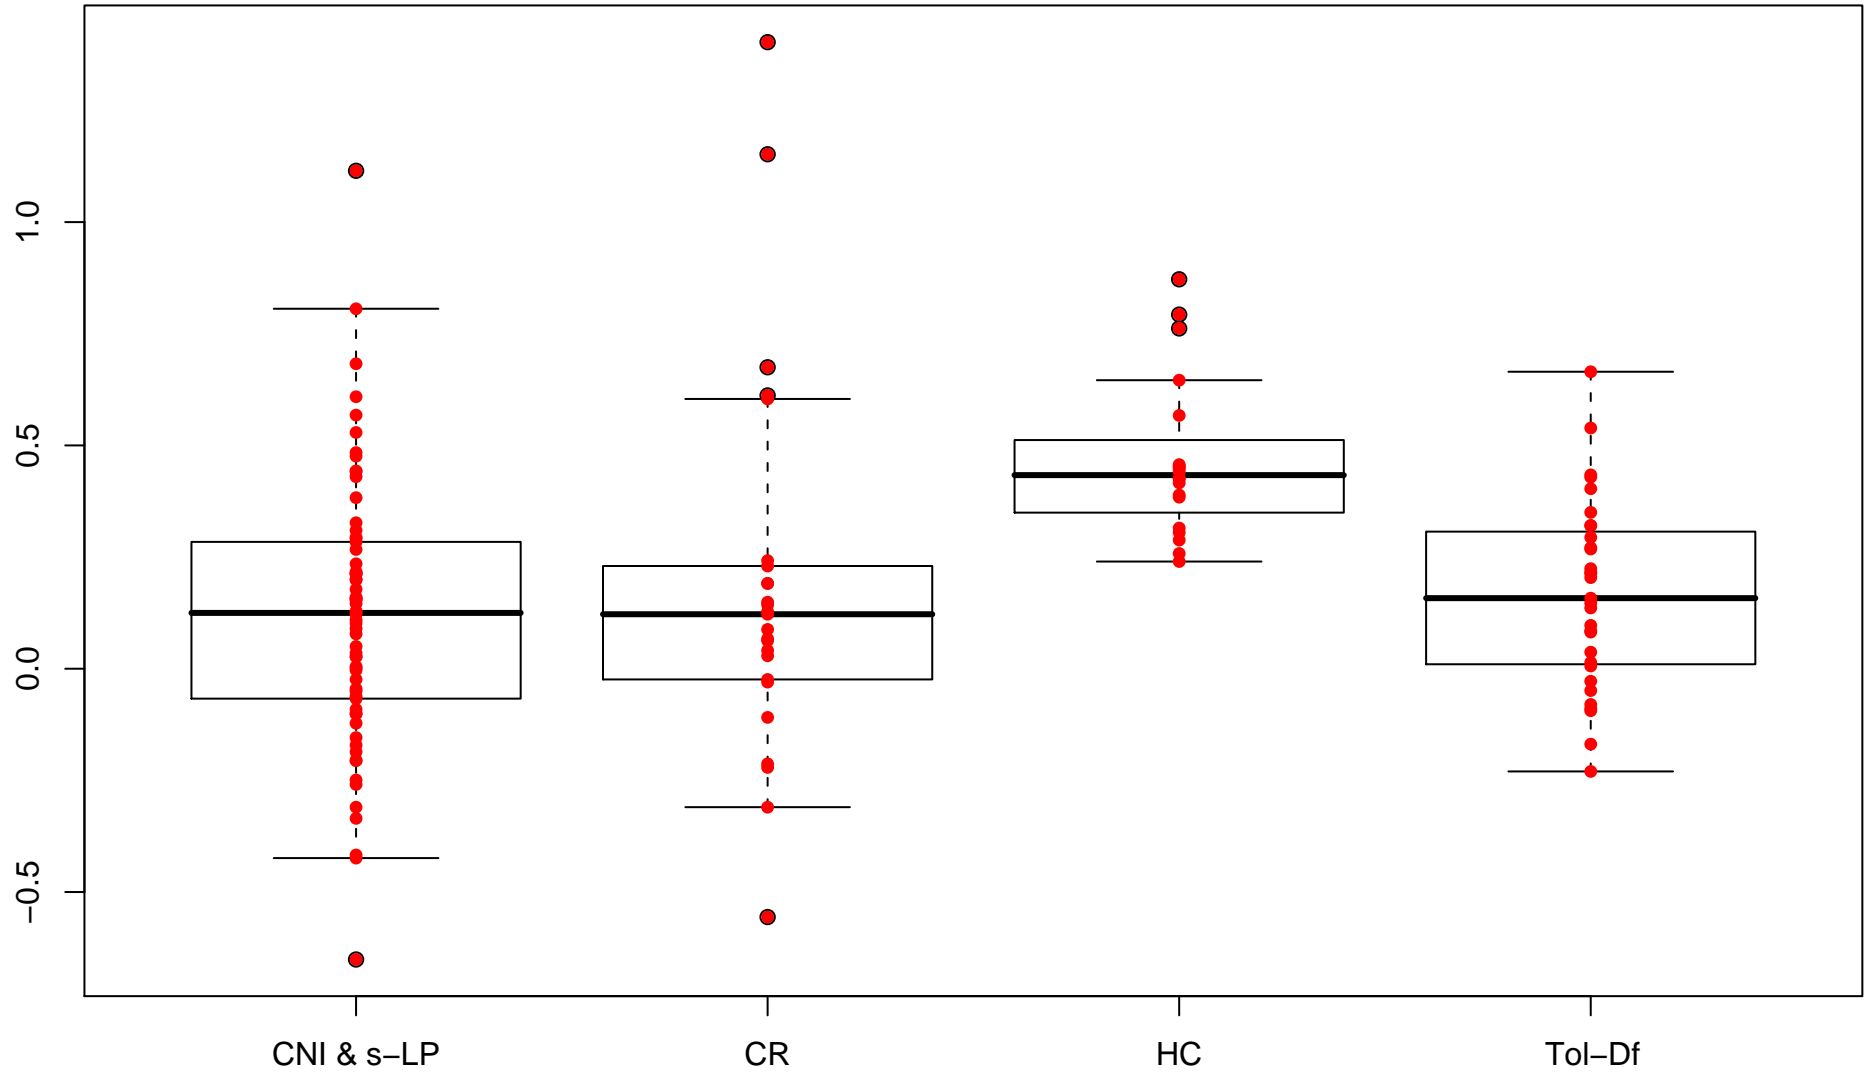

Rank 203 : CD52  
8.823e-06

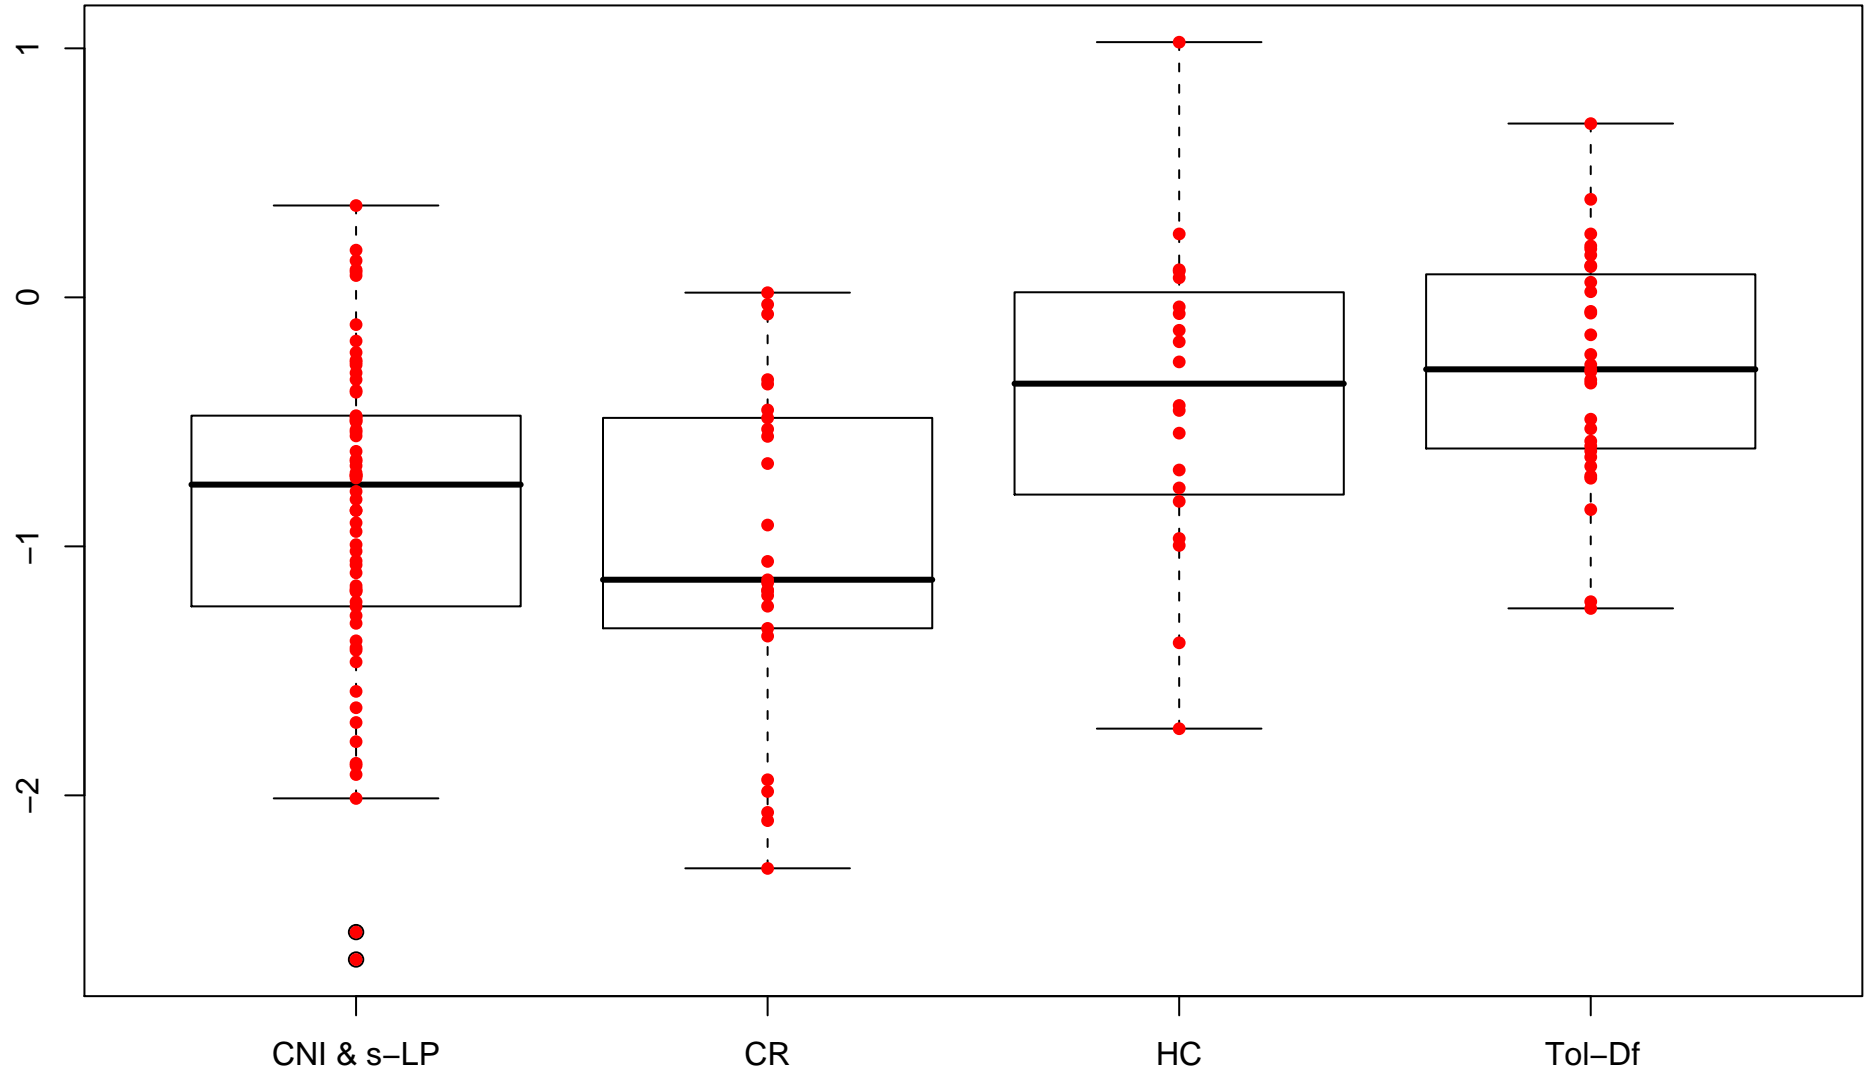

Rank 204 : CD2  
8.883e-06

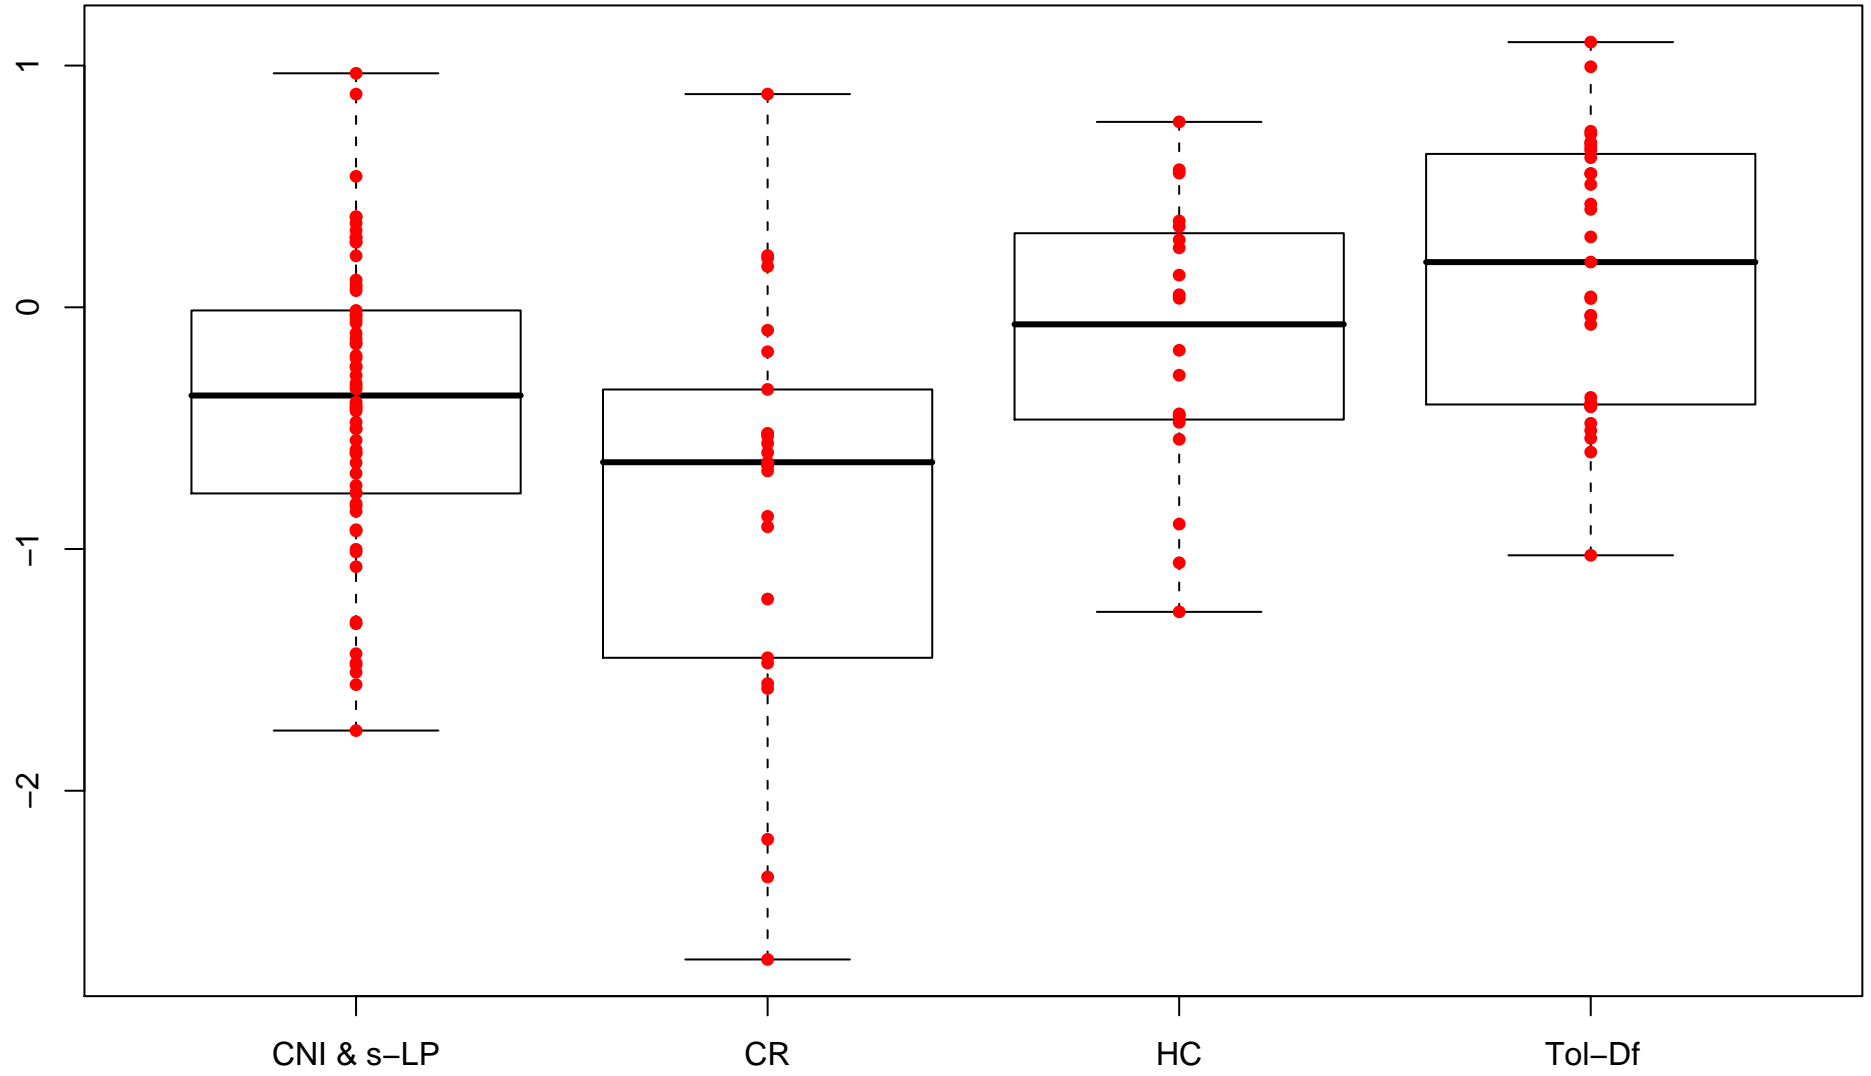

Rank 205 : CD40  
8.986e-06

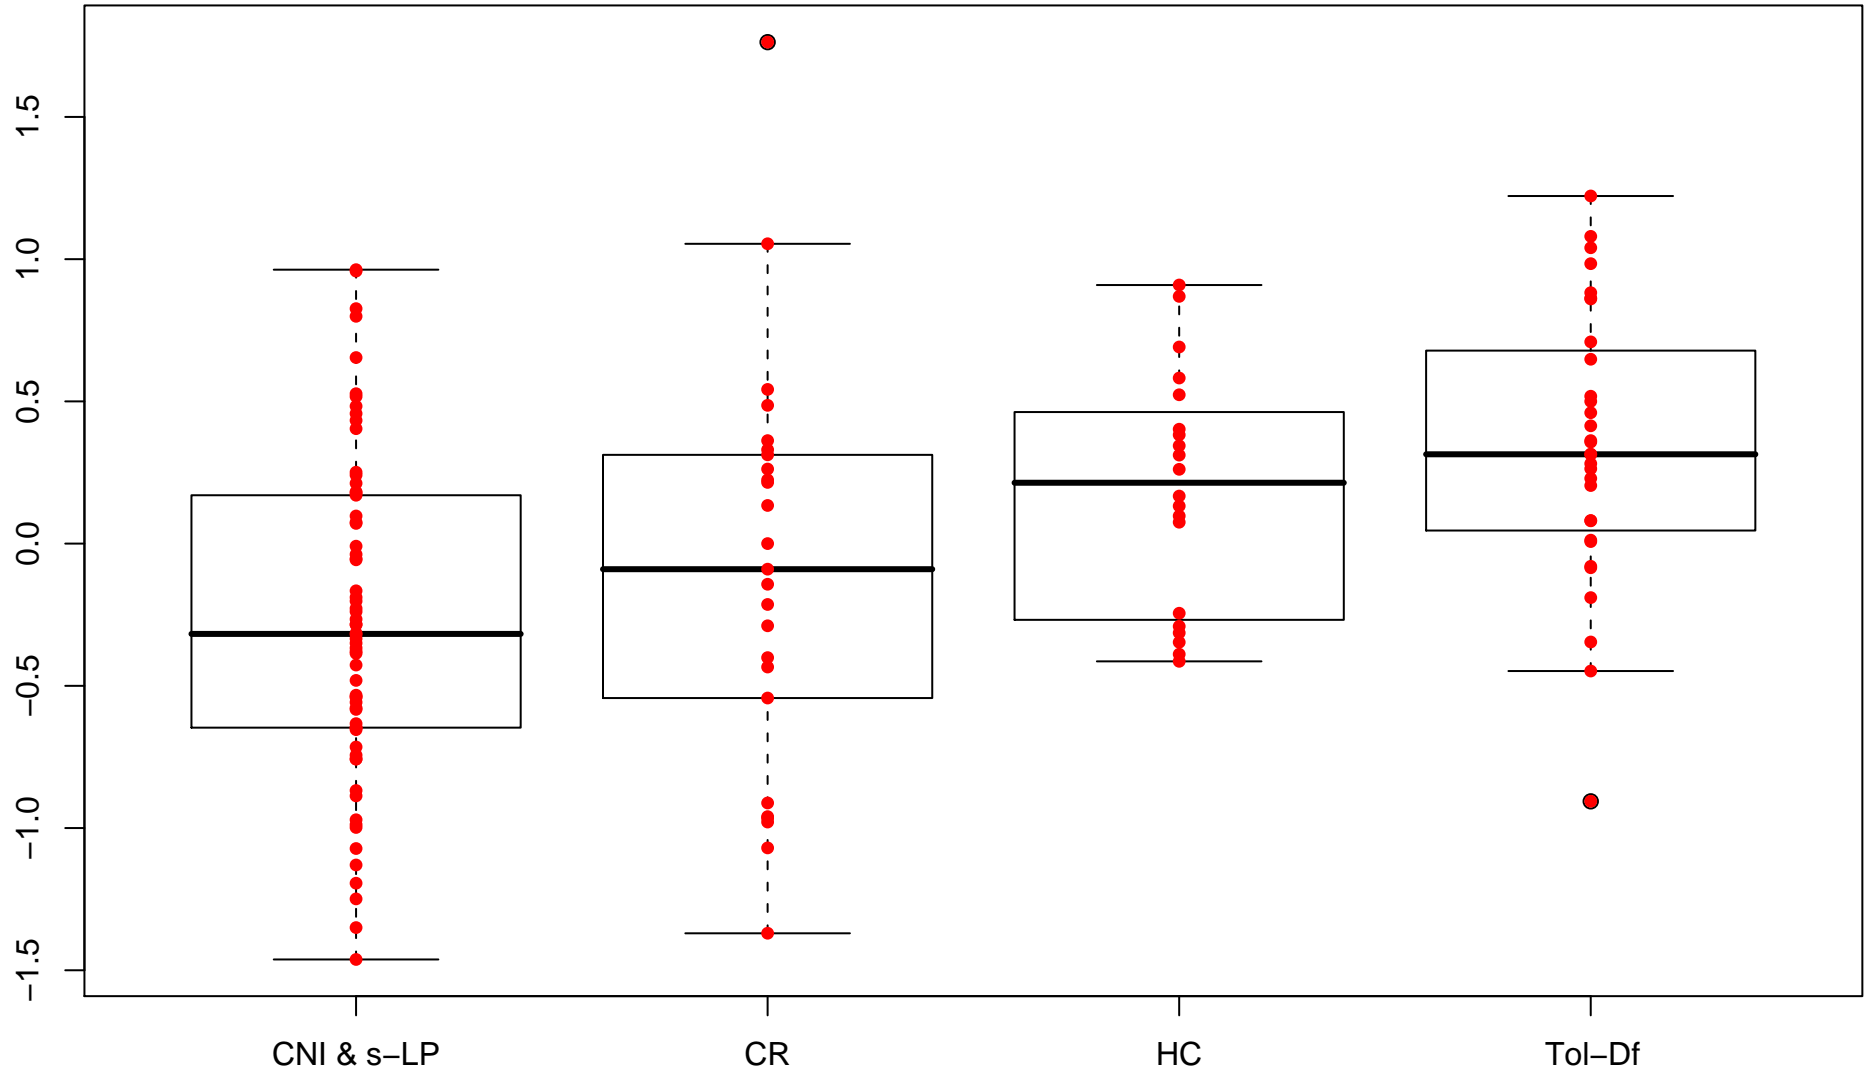

Rank 206 : TCF3

8.988e-06

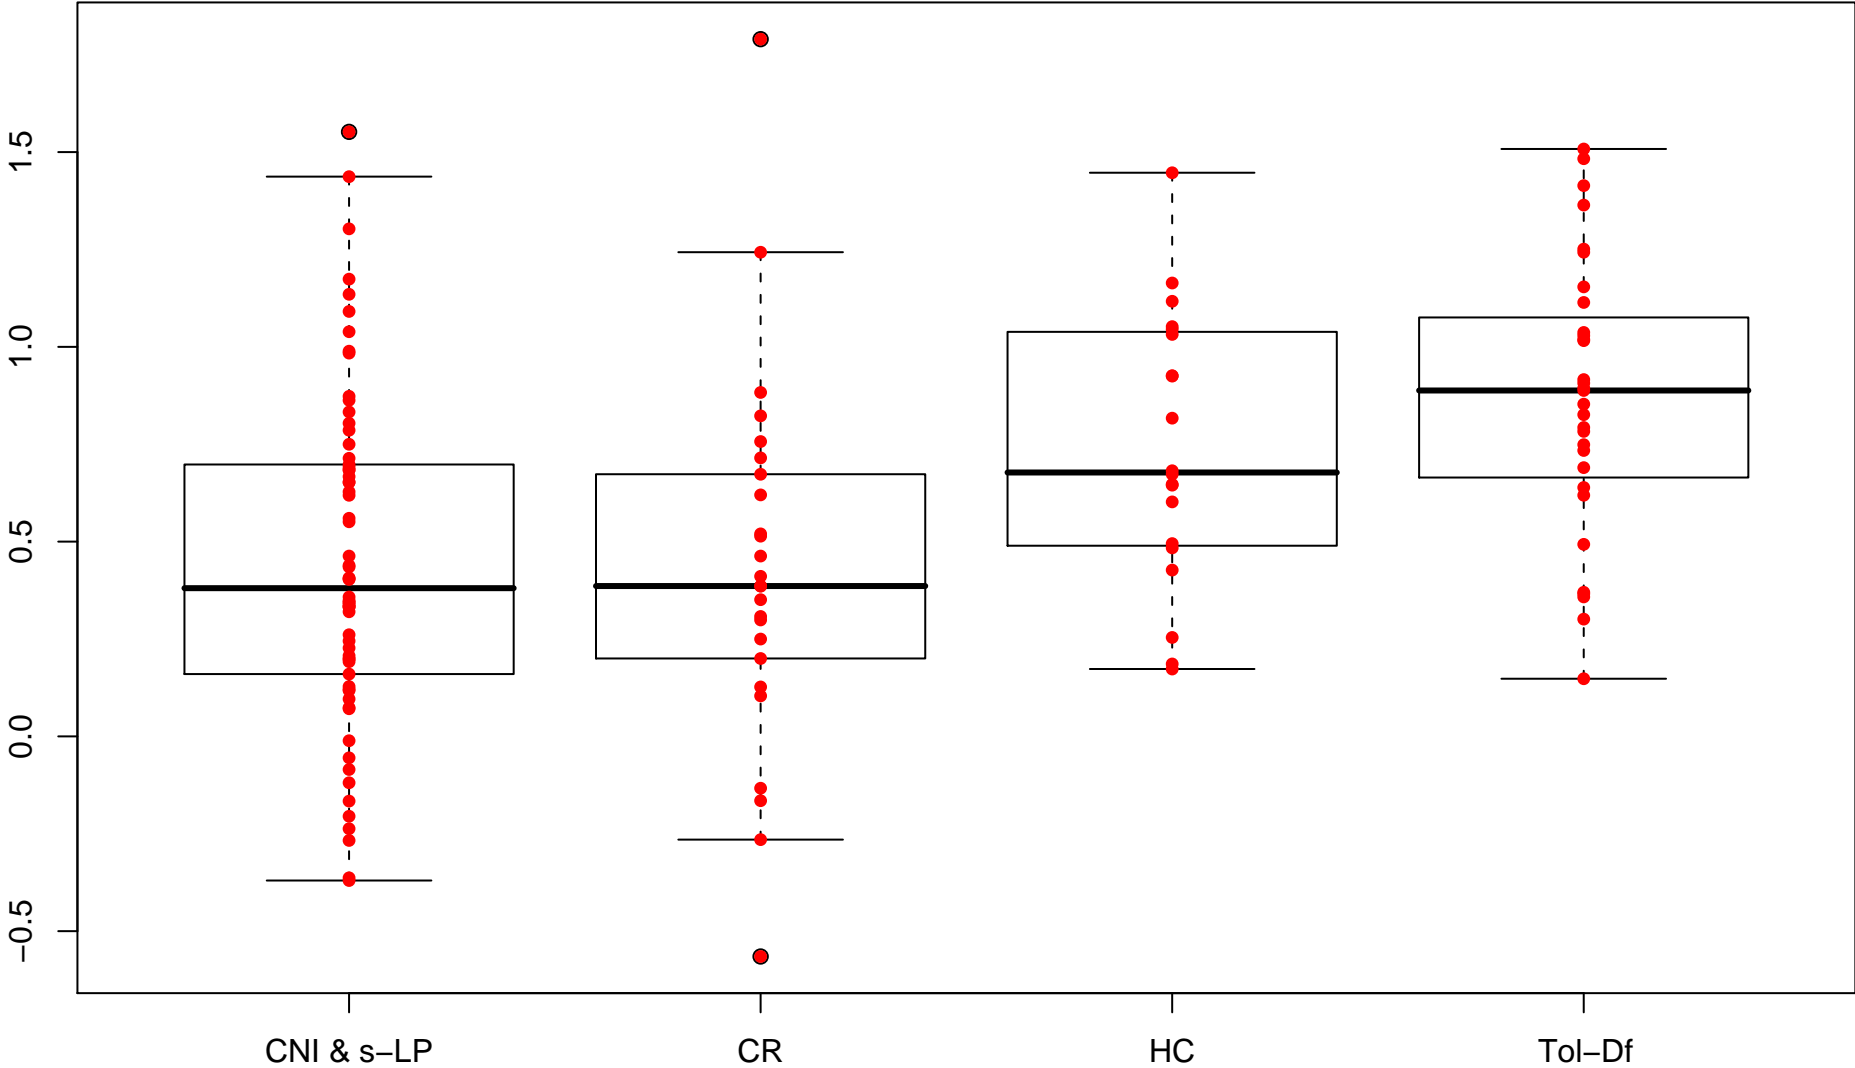

Rank 207 : LCK  
9.061e-06

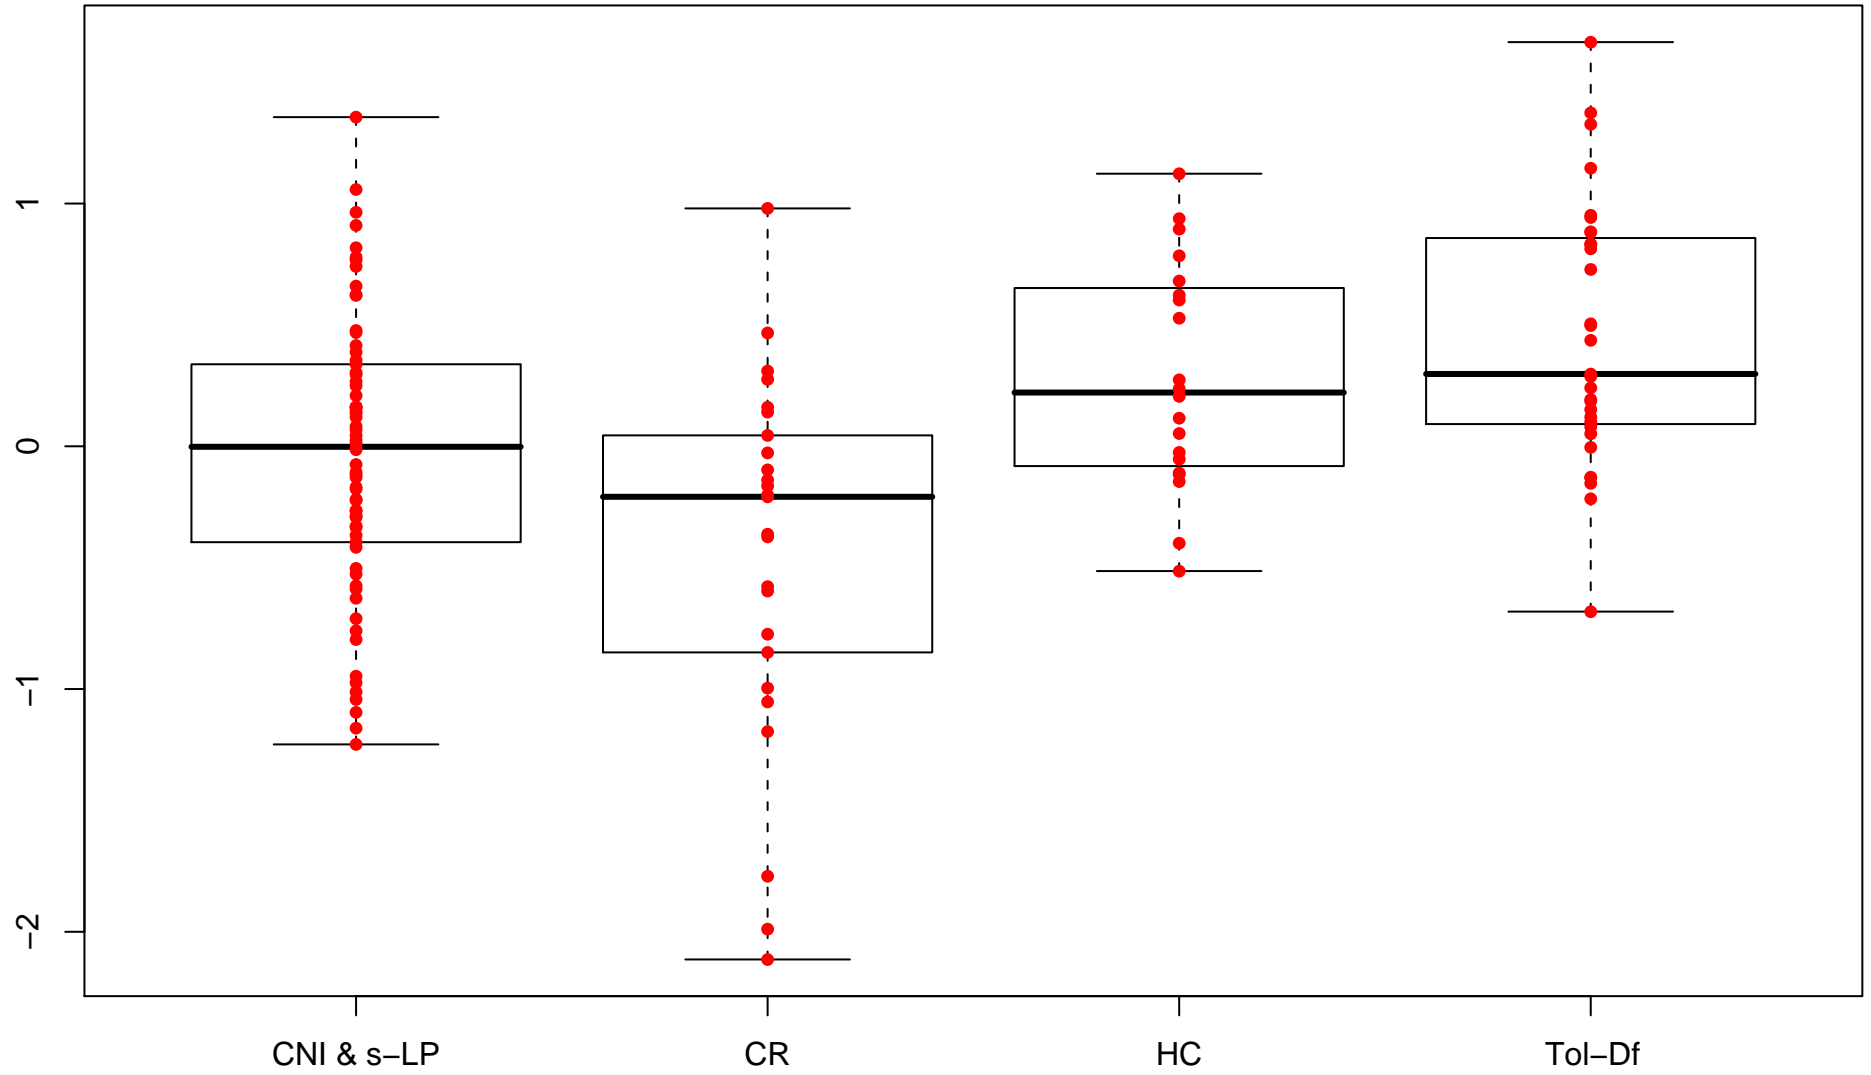



Rank 208 : PFKFB3  
9.475e-06

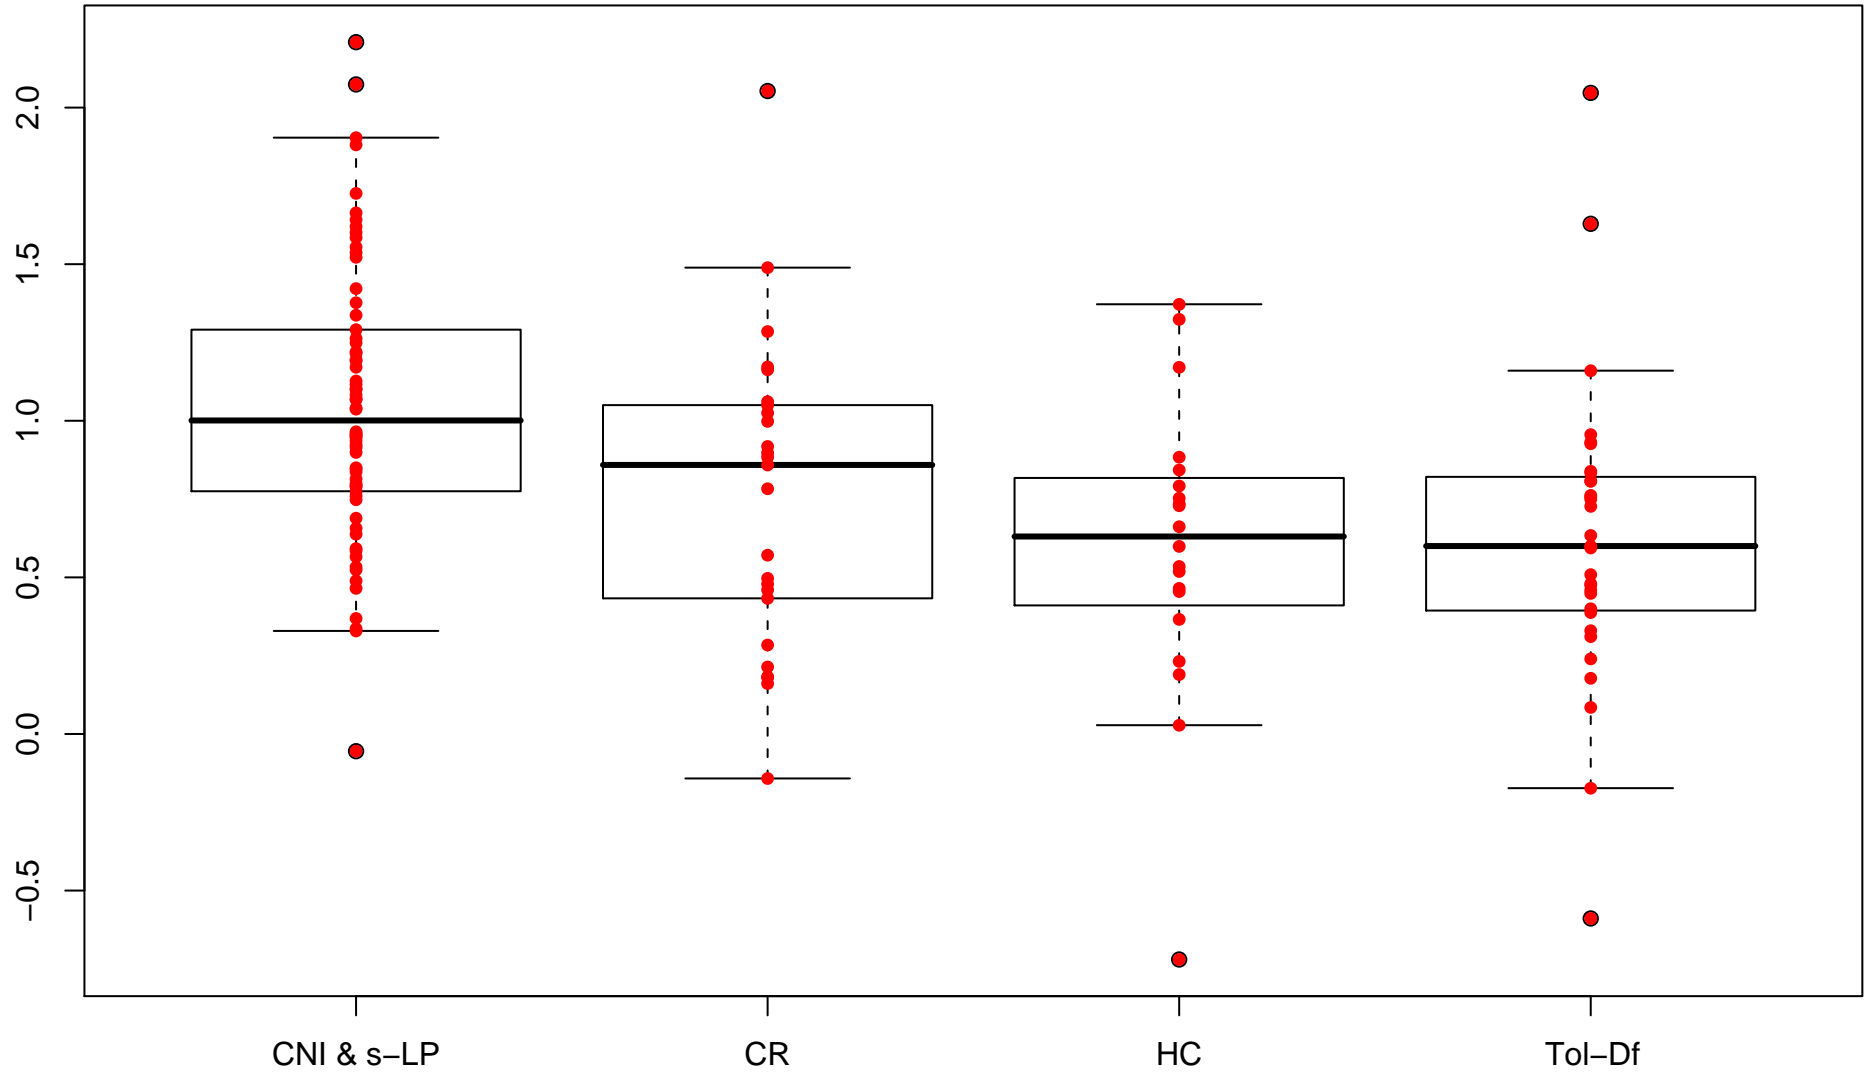

Rank 209 : SFRS10  
9.566e-06

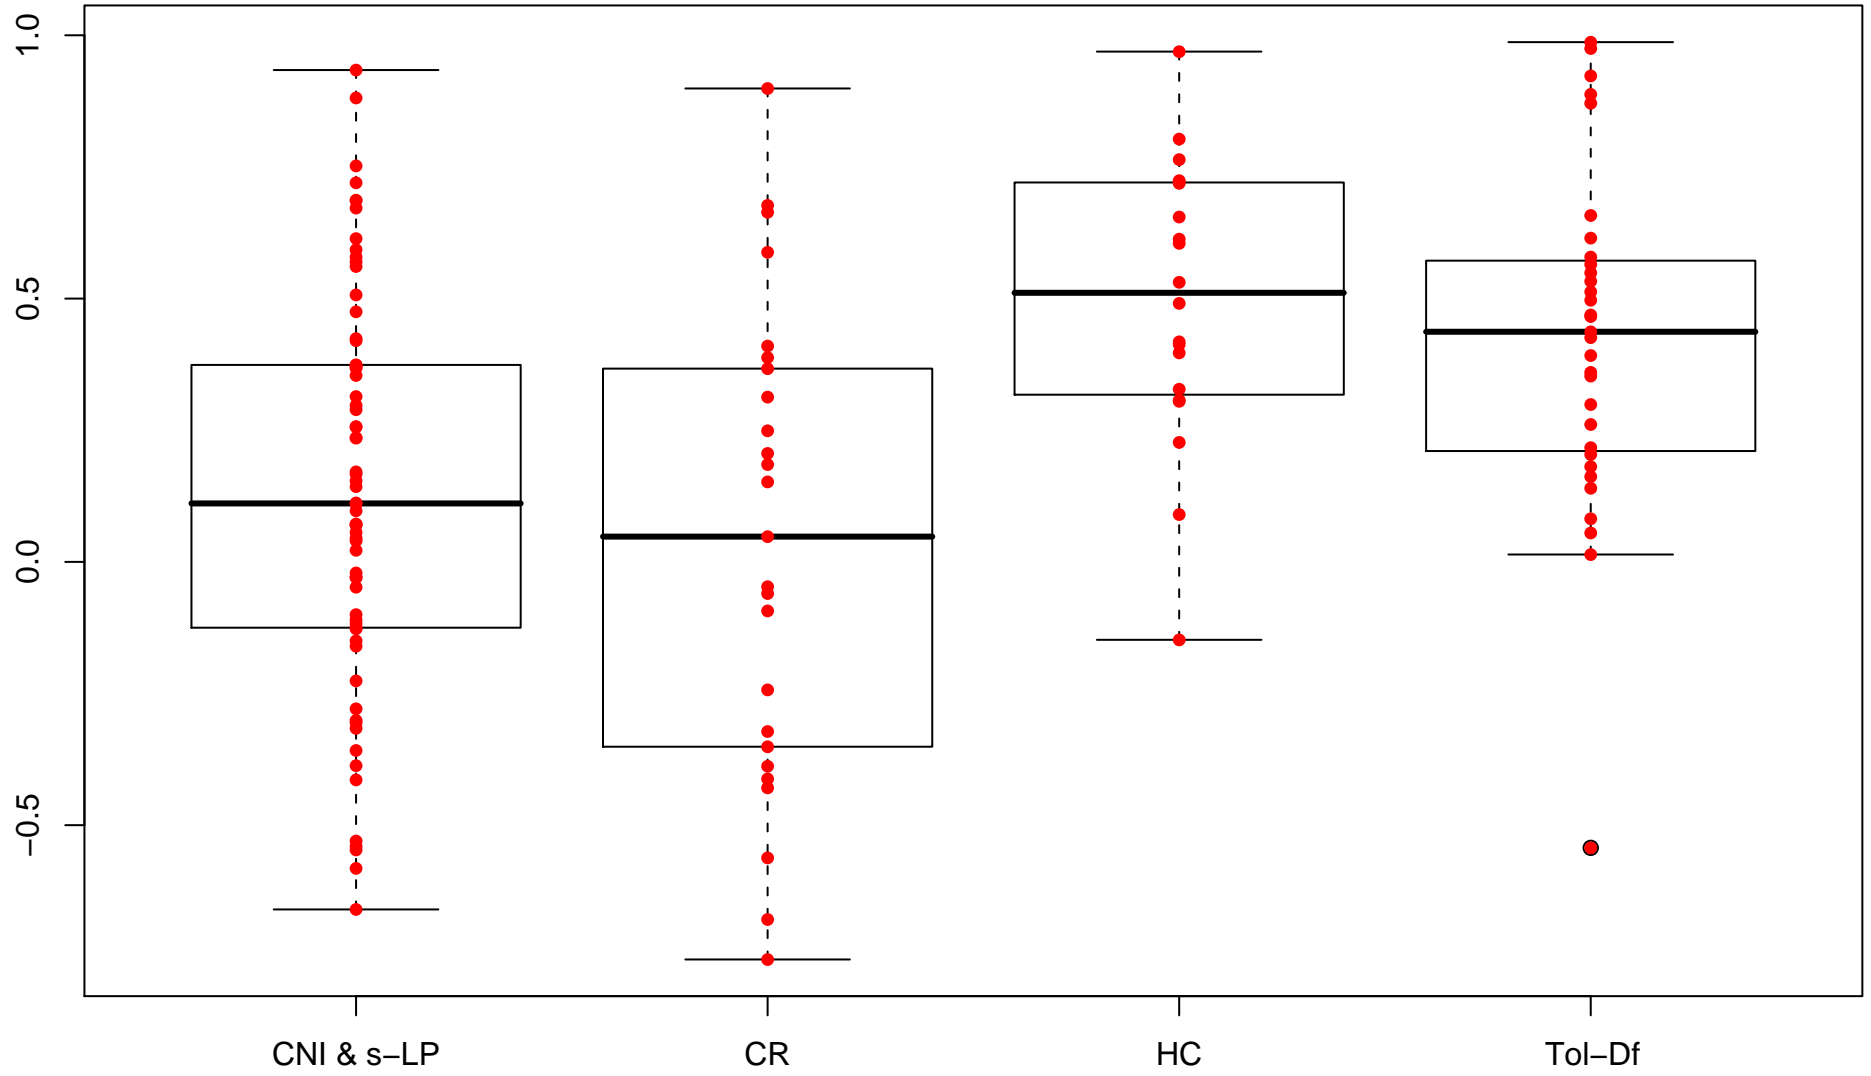

Rank 210 : NMD3  
9.775e-06

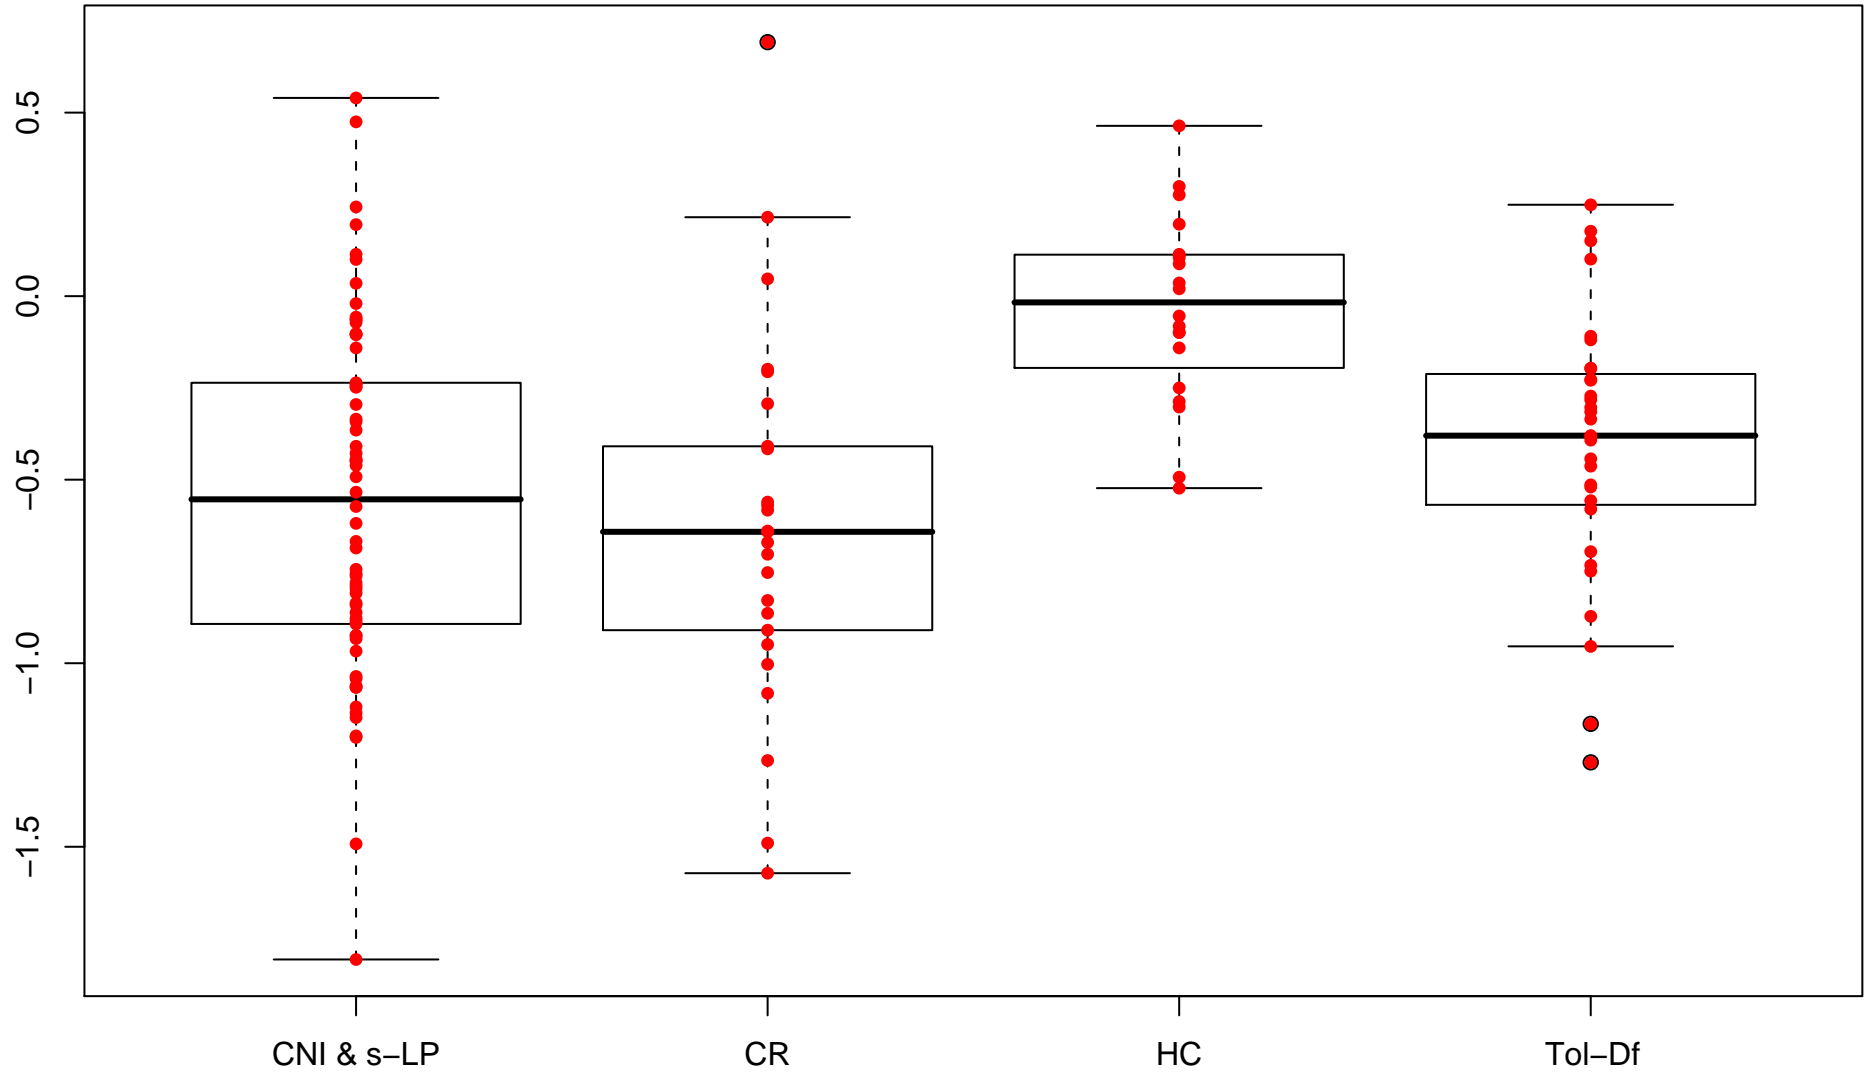

Rank 211 : MEFV  
9.812e-06

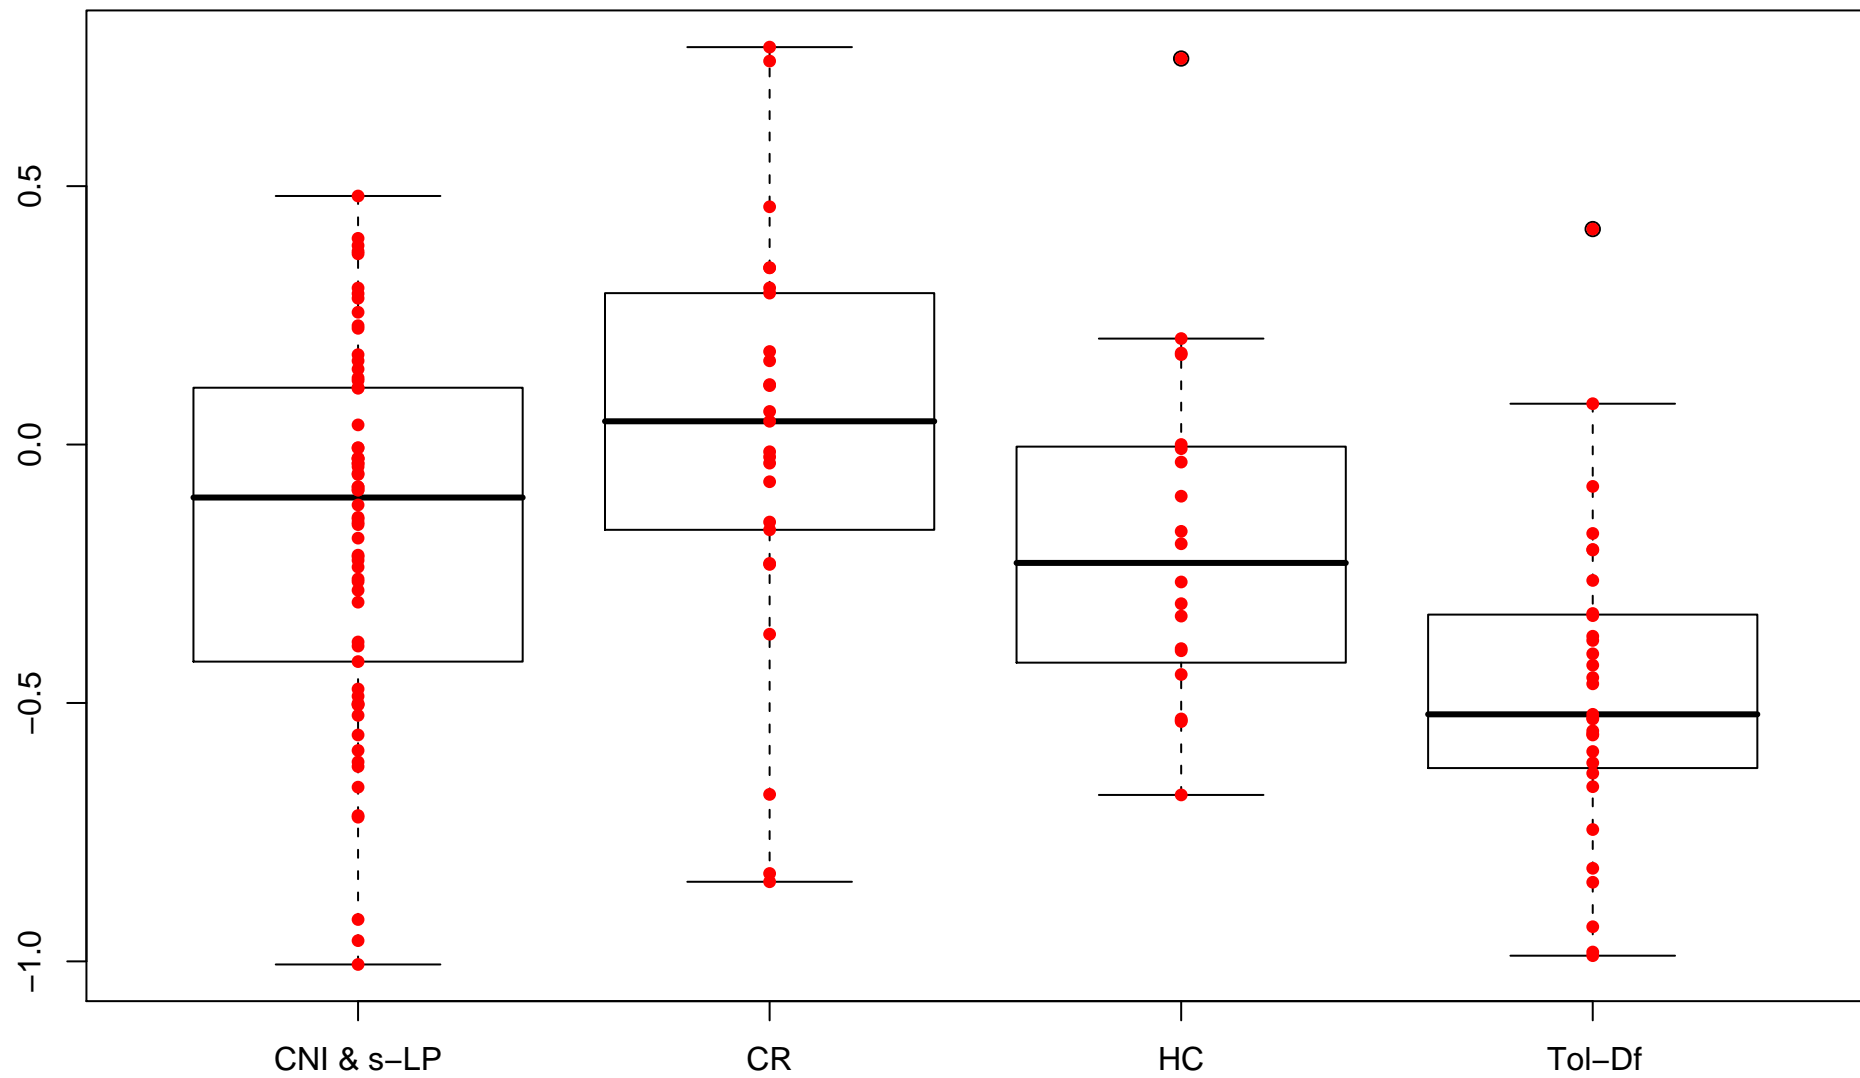

Rank 212 : LIMA1  
9.994e-06

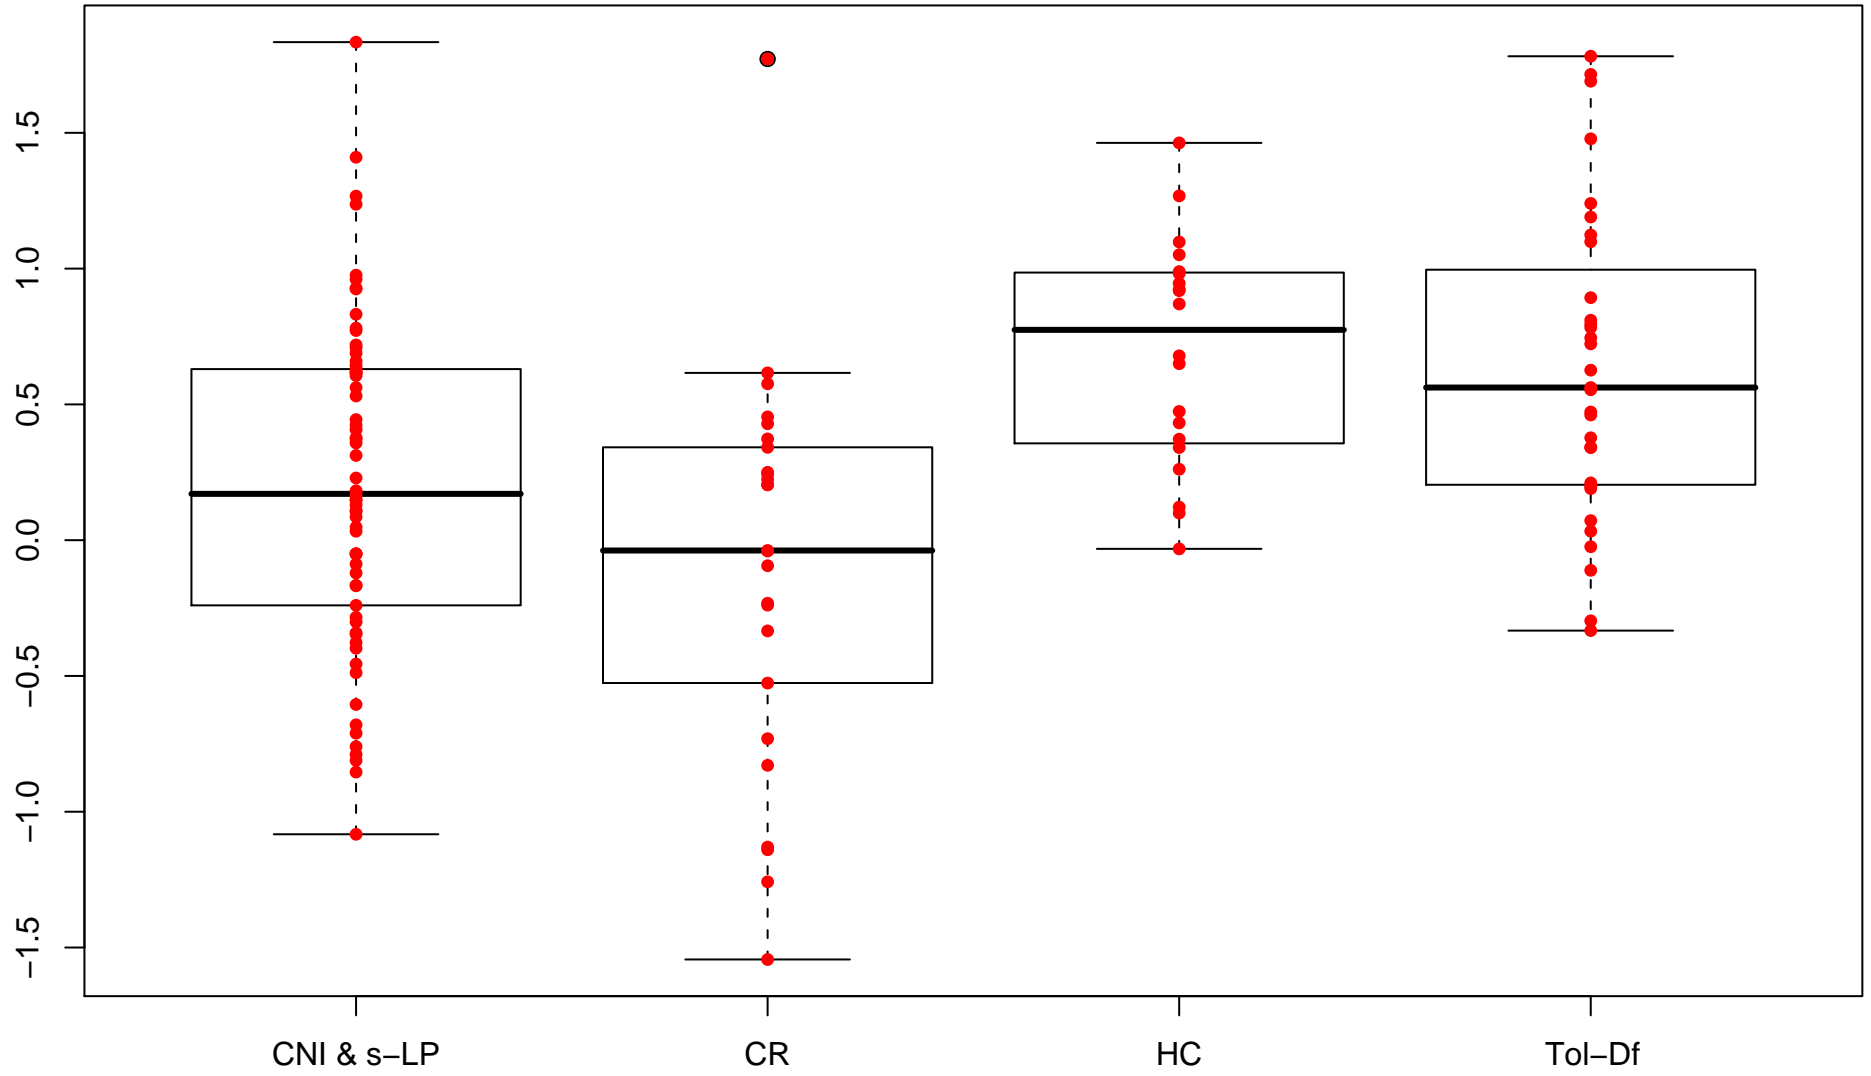

Rank 213 : GZMK  
1.0079e-05

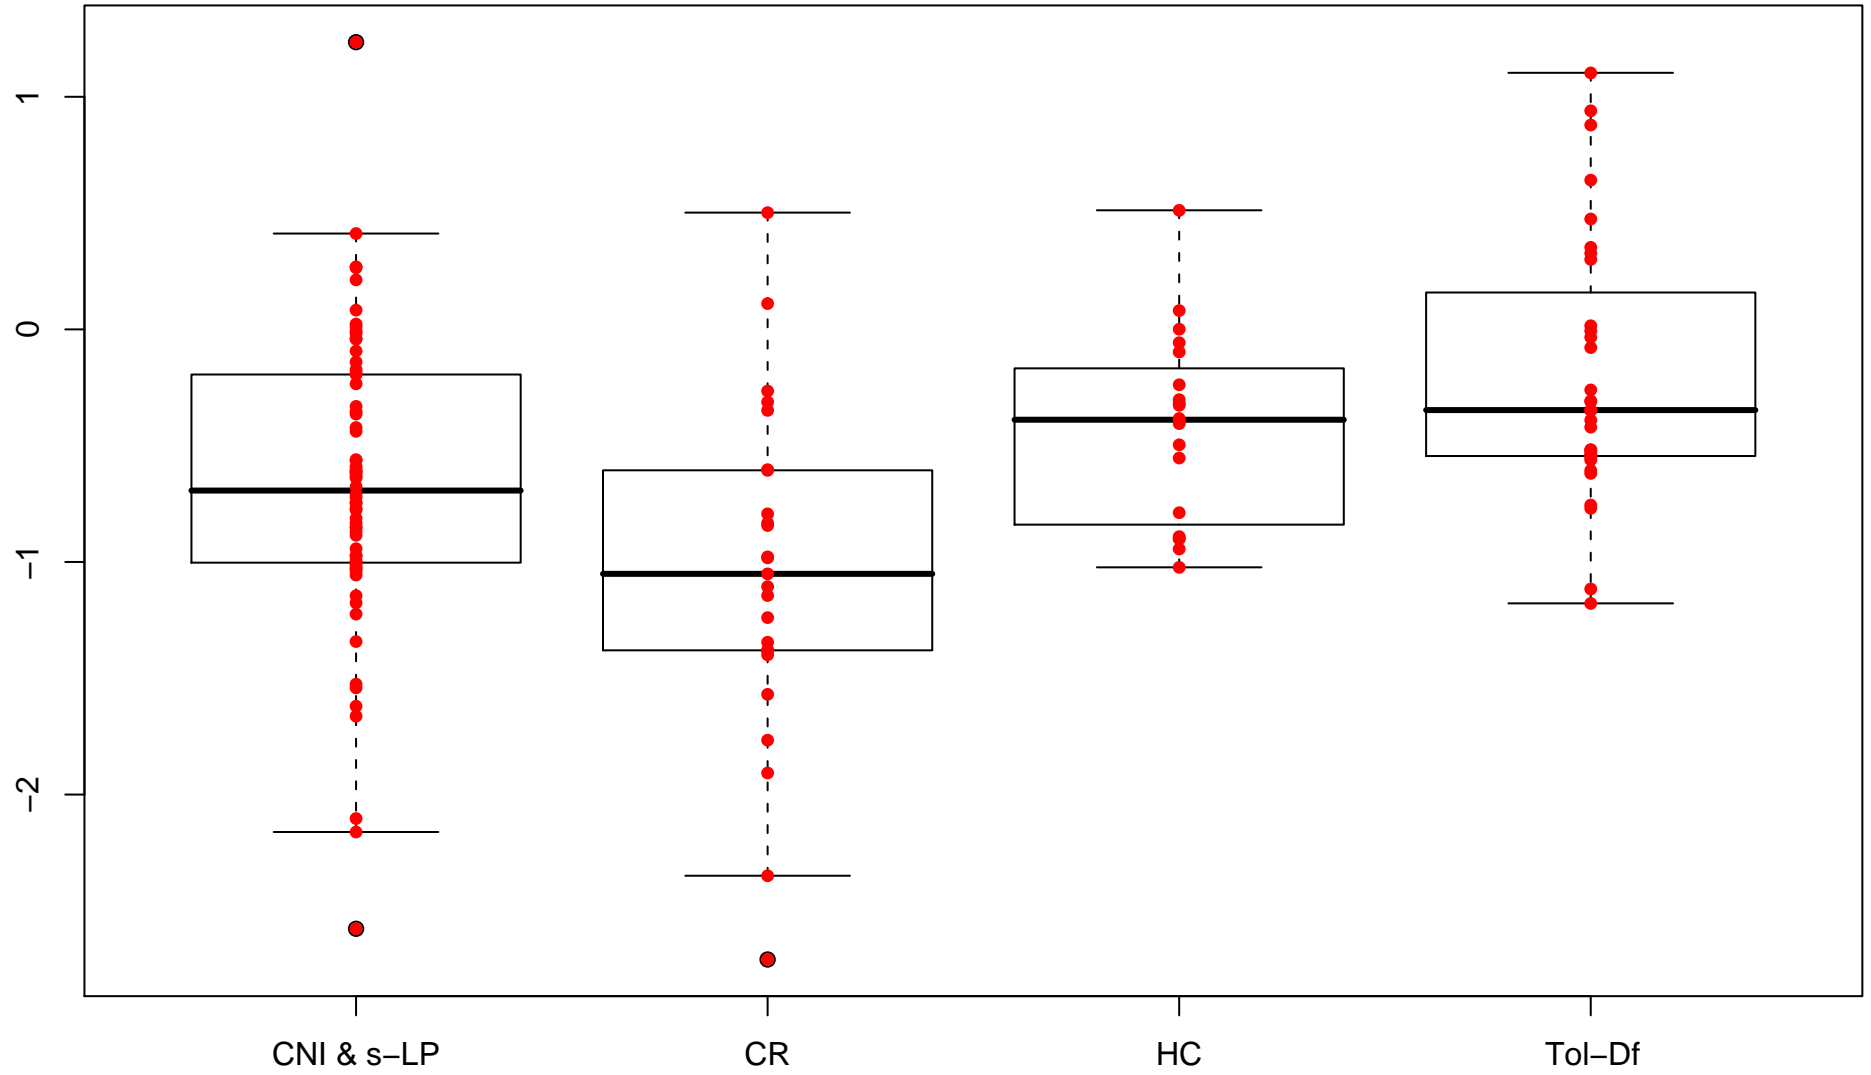

Rank 214 : ASPH  
1.0108e-05

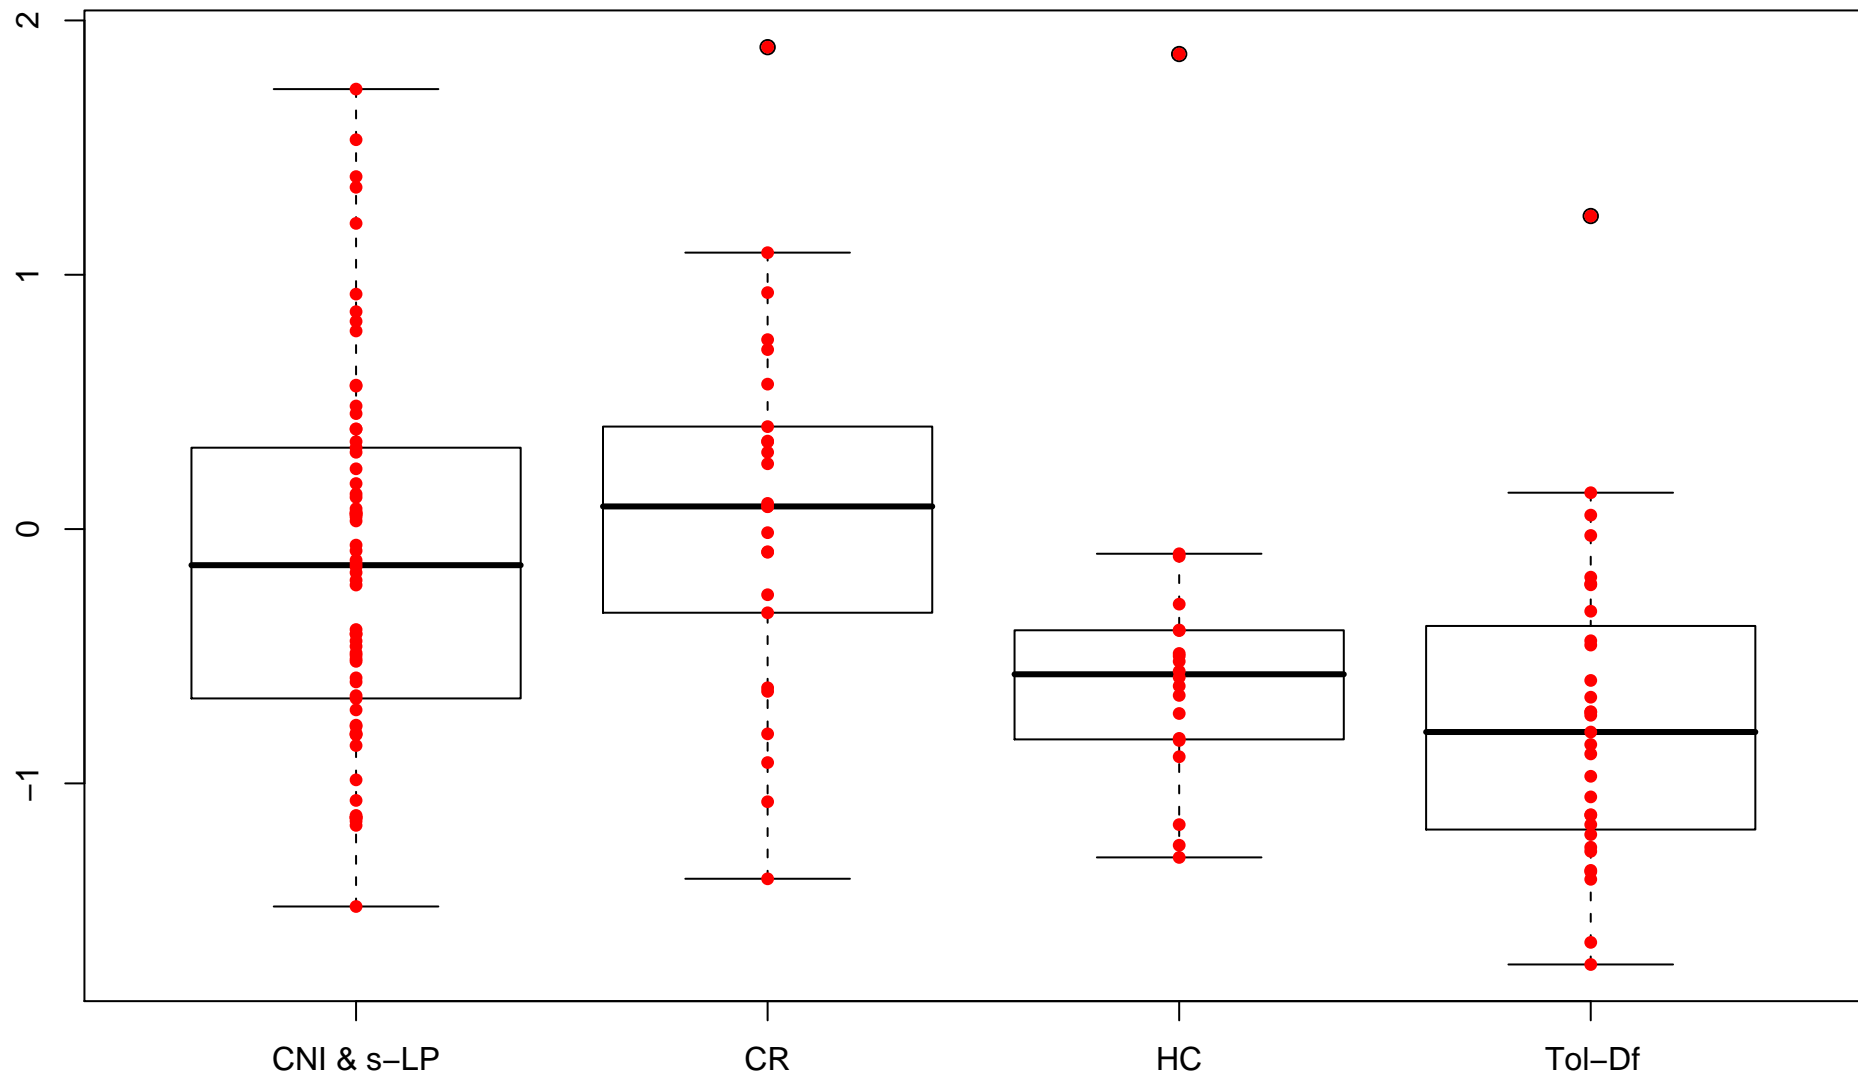

Rank 215 : MS4A6A  
1.0643e-05

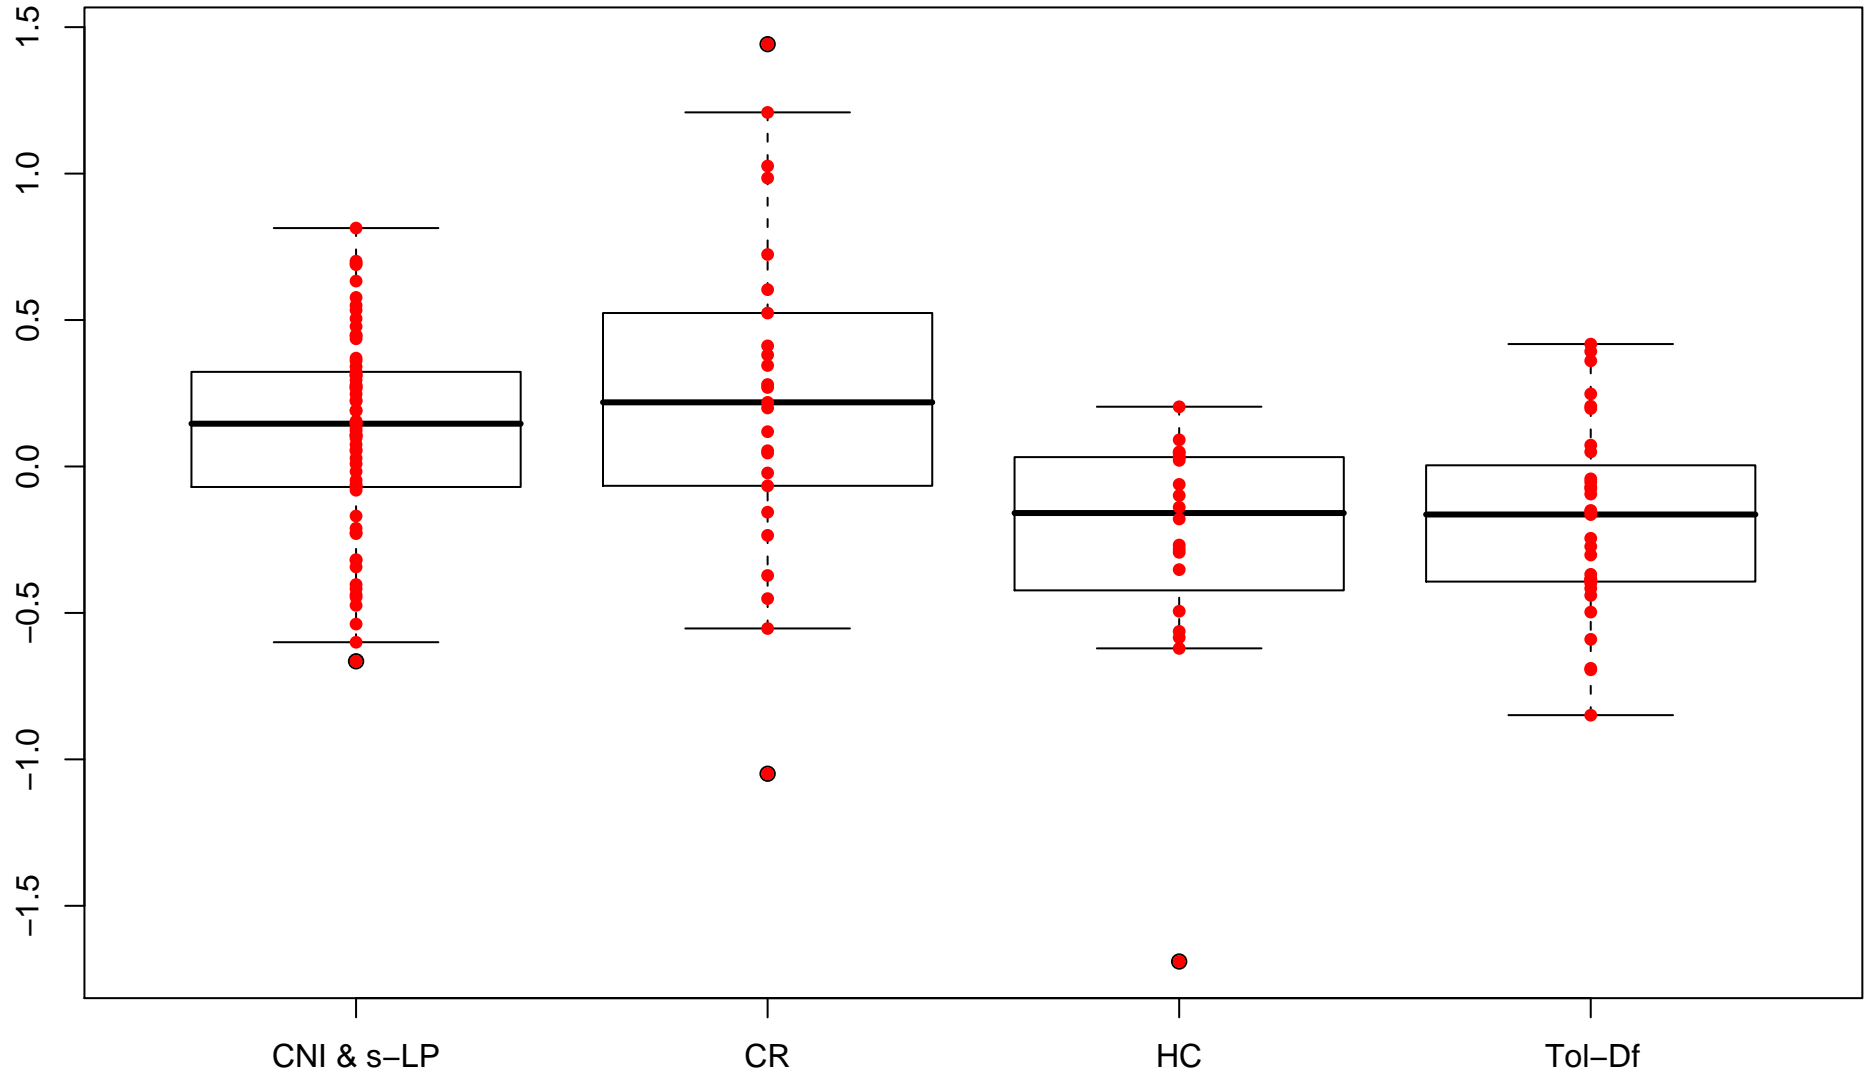



C441124;LOC642788;LOC646301;LOC646434;LOC653056;LOC728100;LOC728417;LOC728728;LOC728790;LOC728791  
1.0722e-05

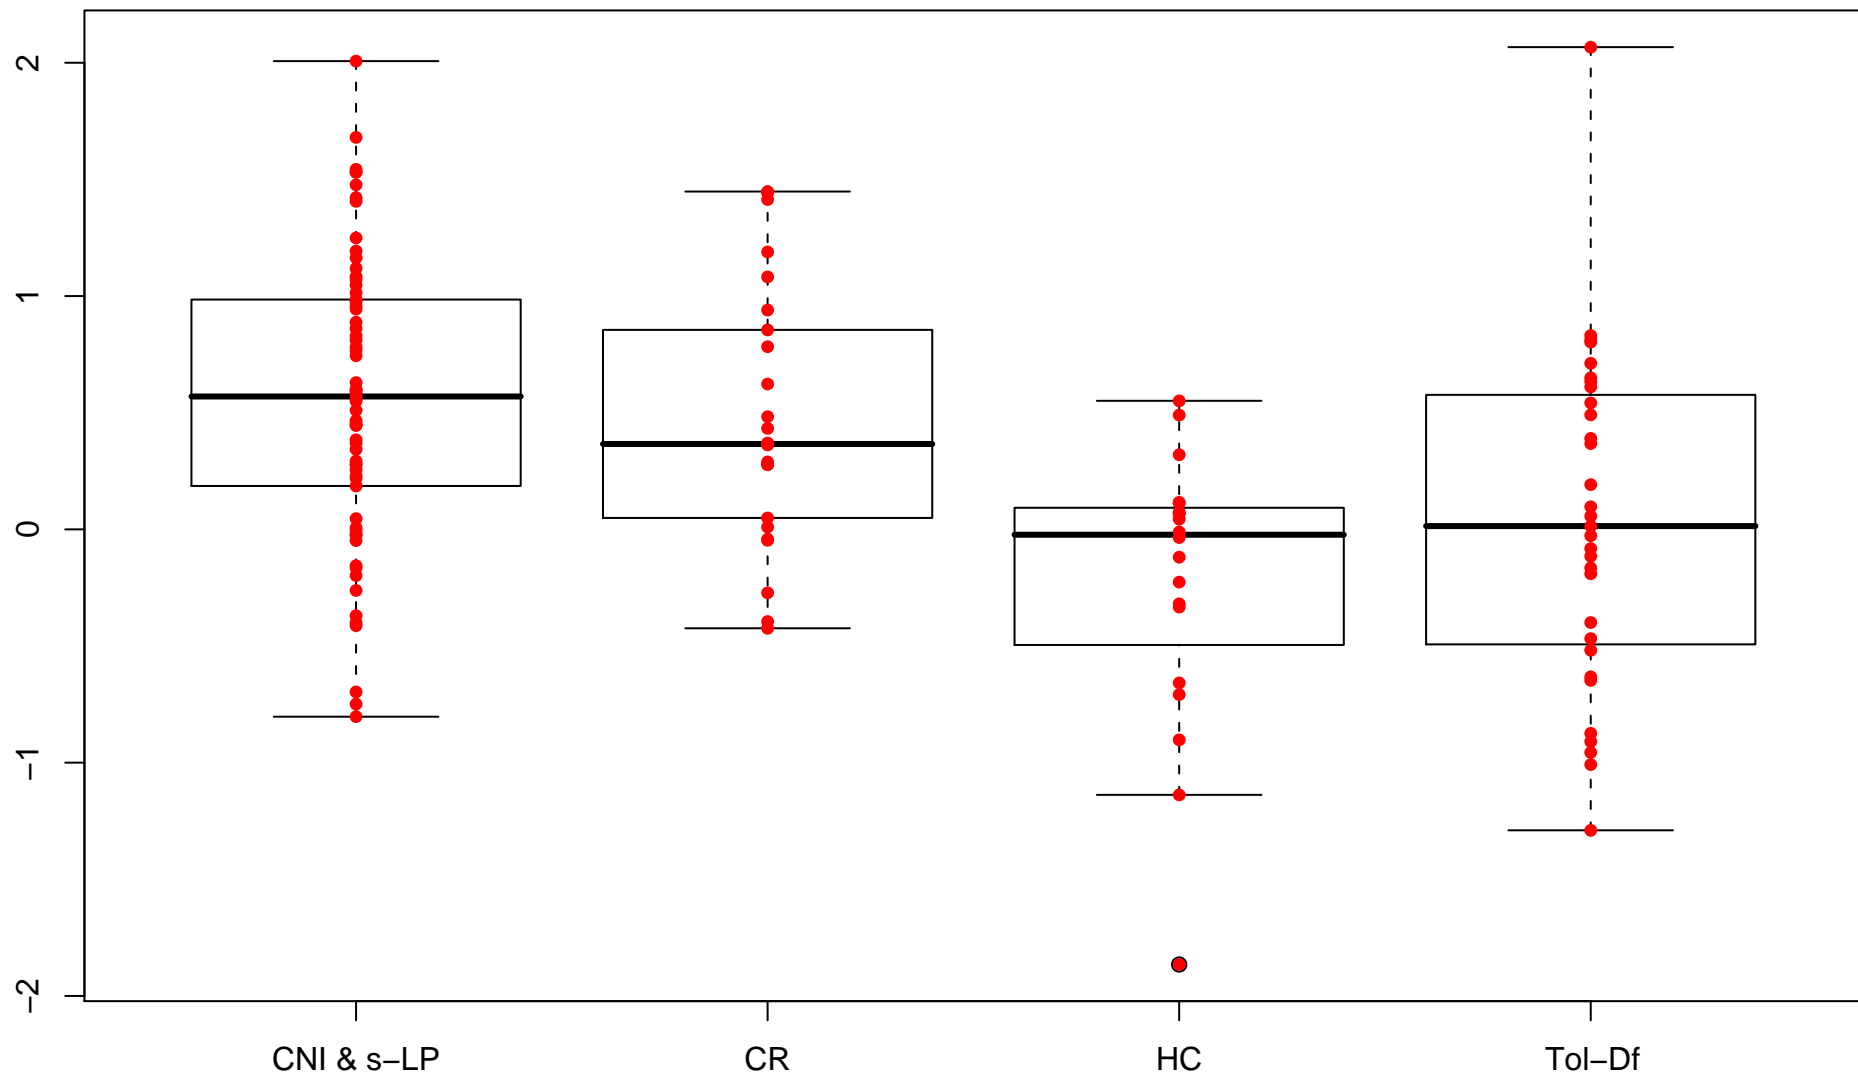

Rank 217 : CCDC18  
1.0952e-05

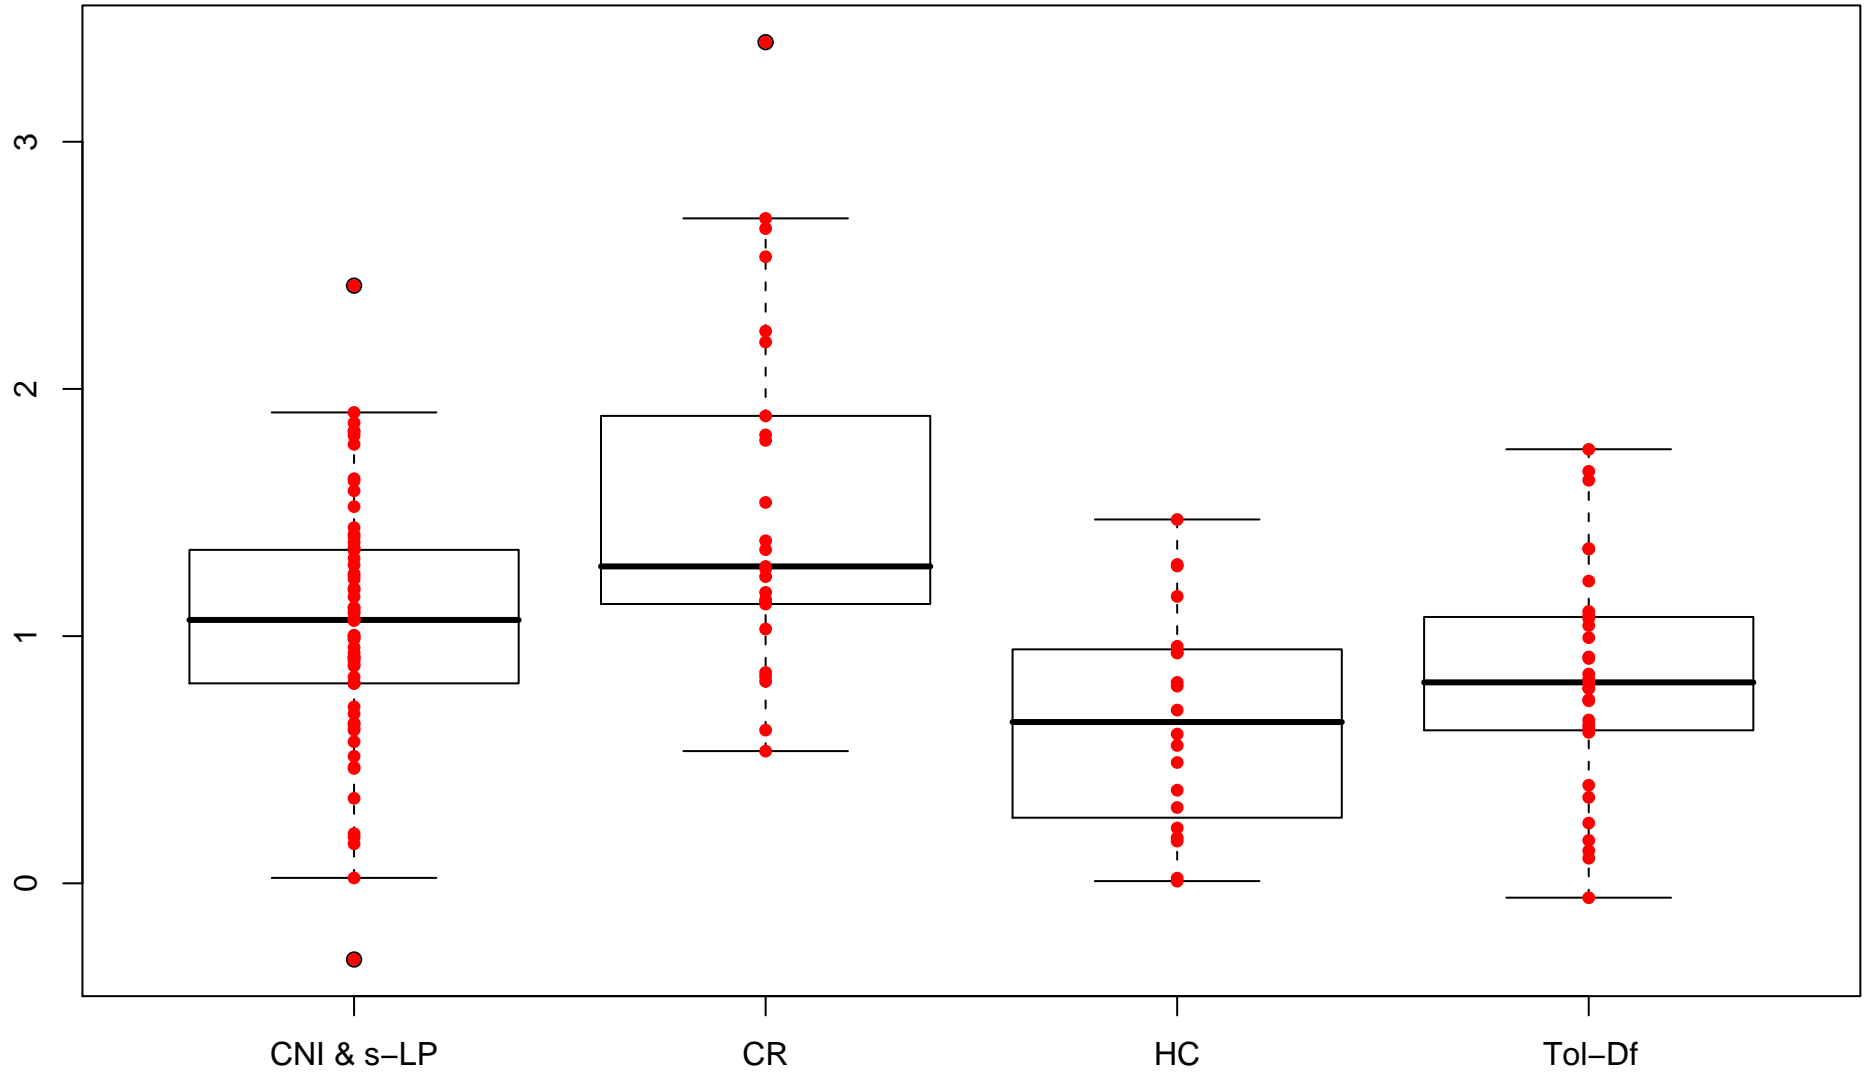

Rank 218 : AIM2  
1.1622e-05

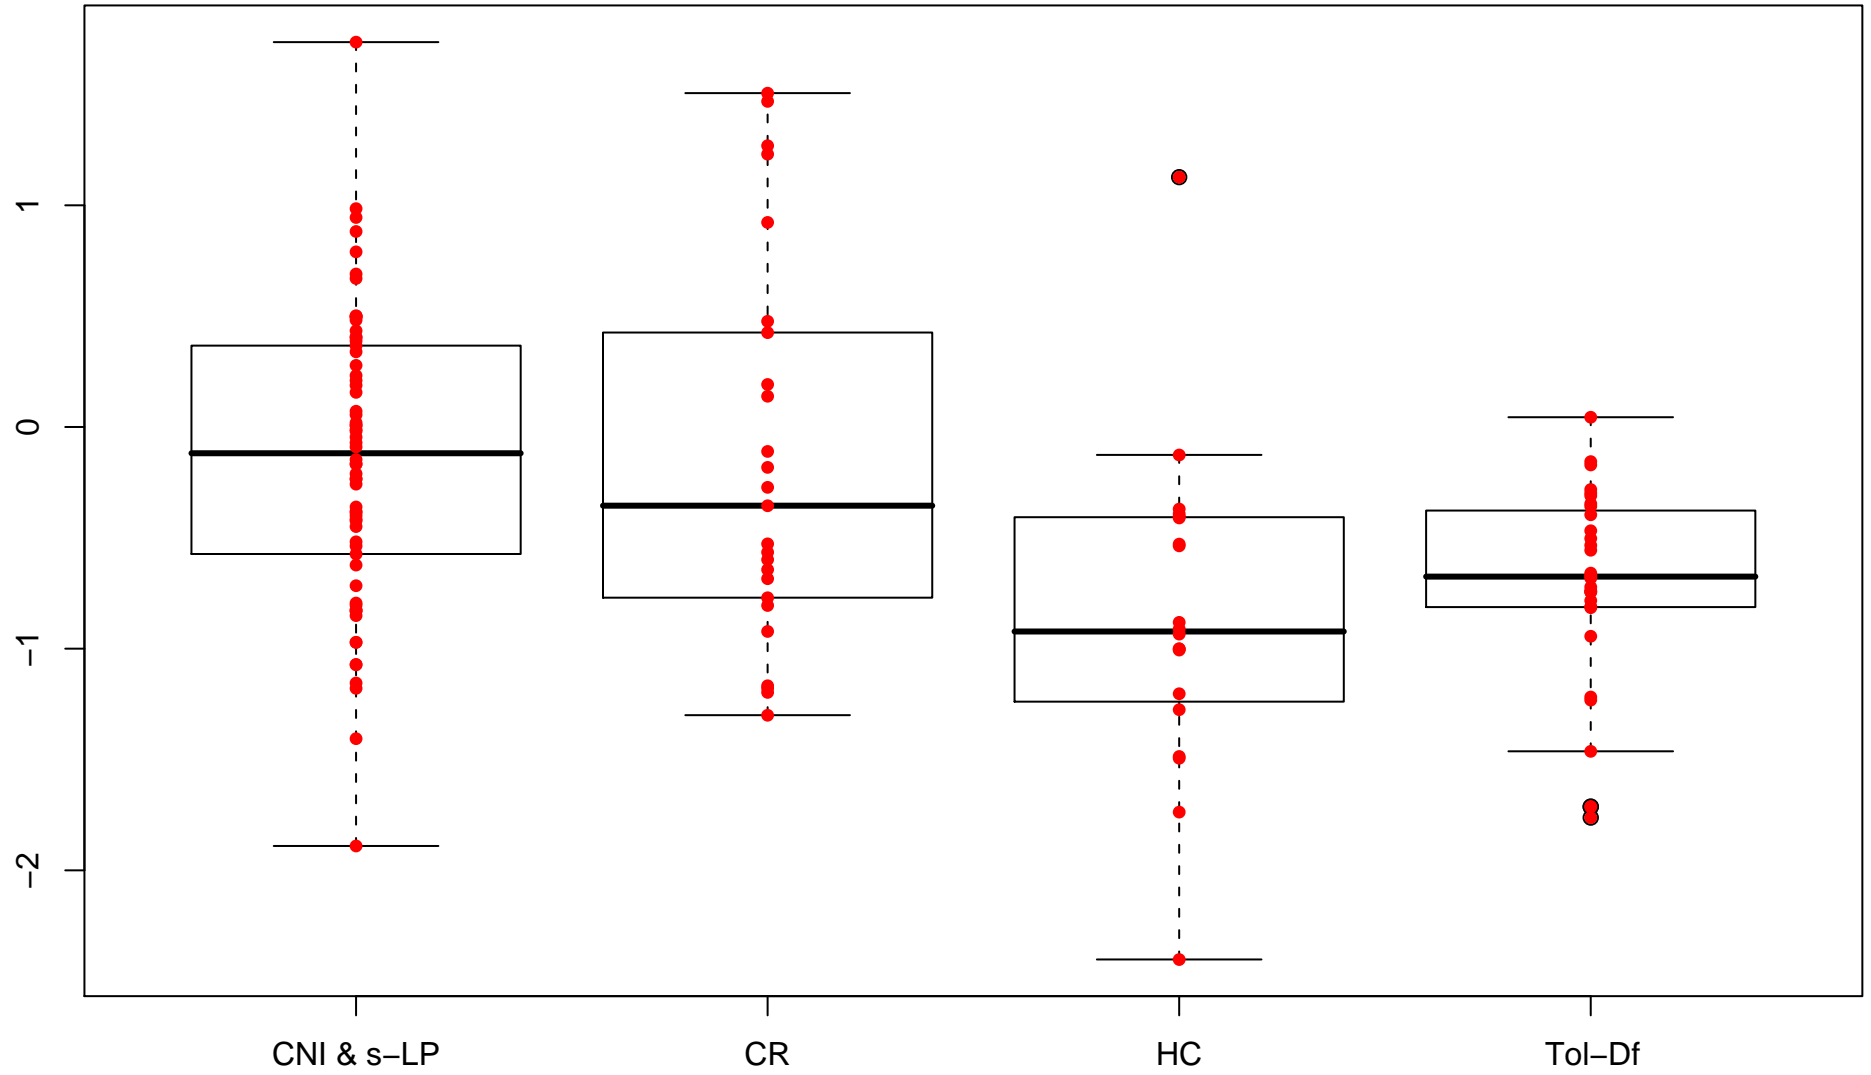

Rank 219 : LOC440731  
1.1767e-05

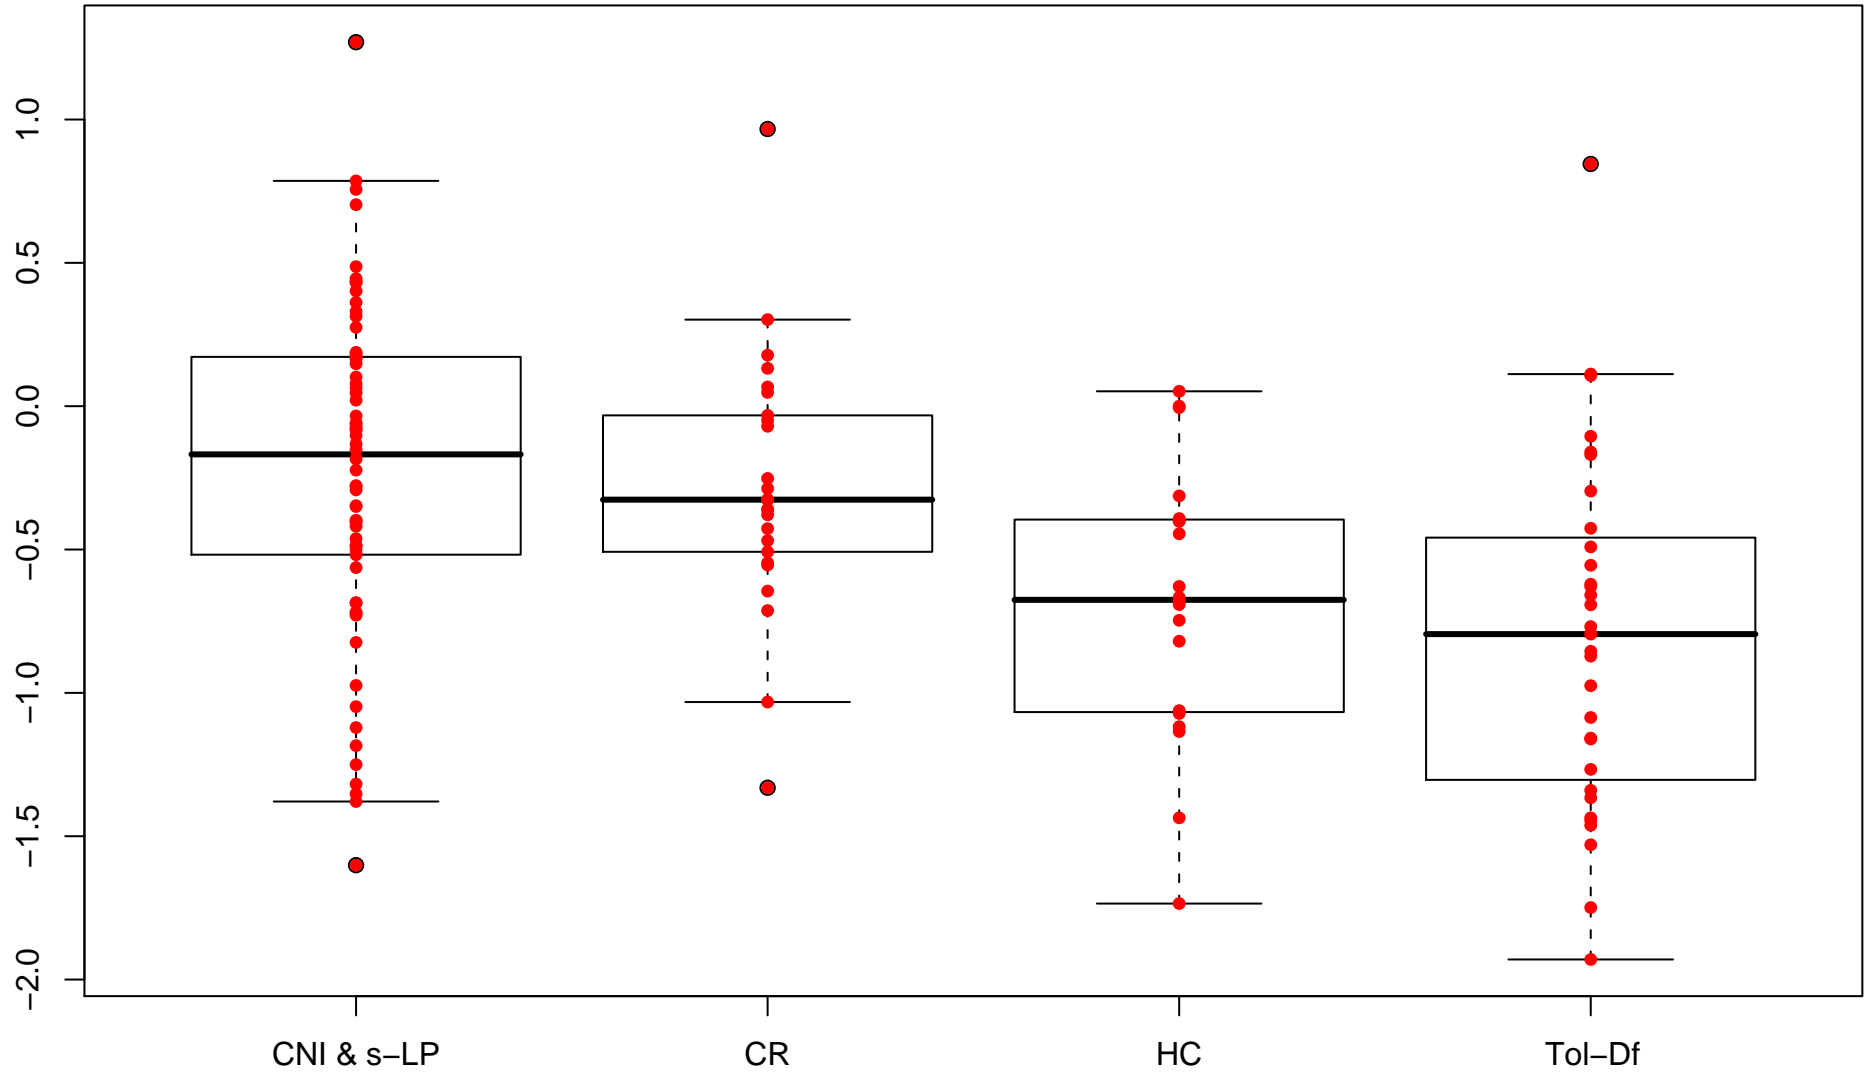

Rank 220 : AKR1B1  
1.2097e-05

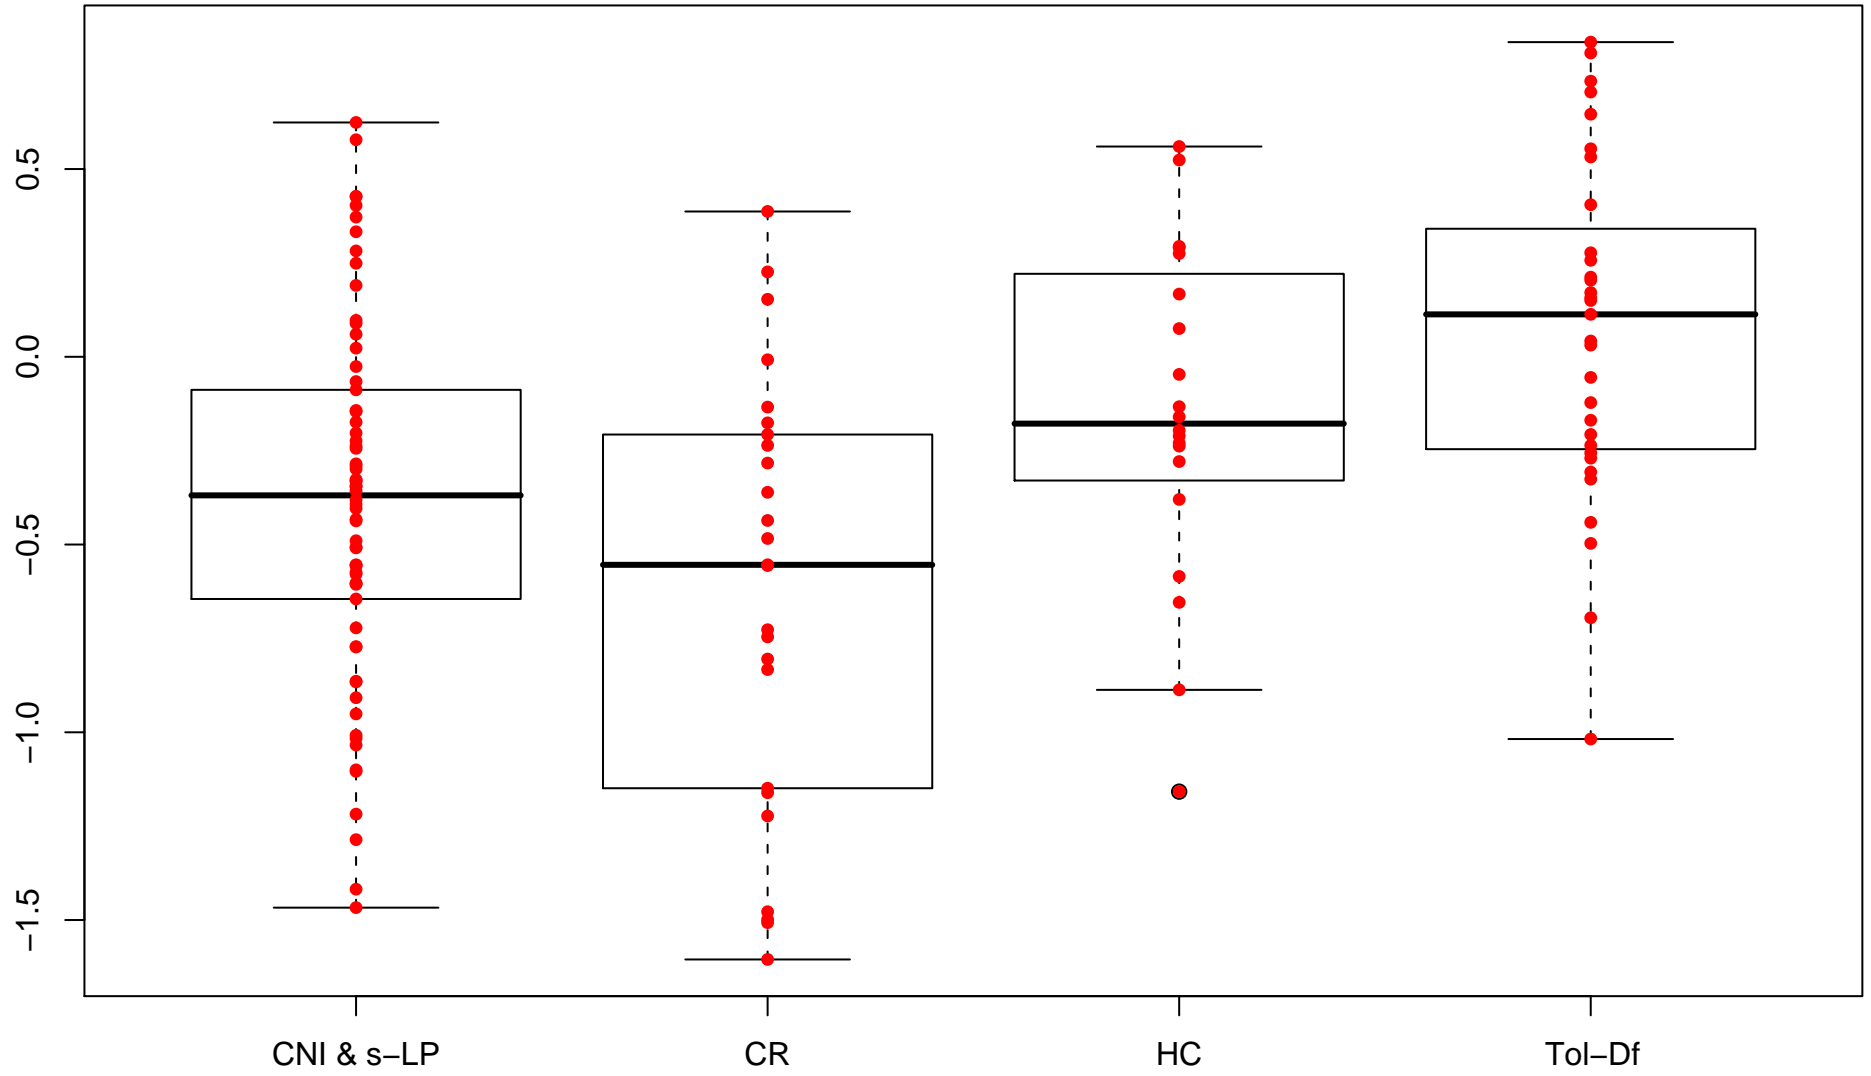

Rank 221 : THC2393621  
1.2149e-05

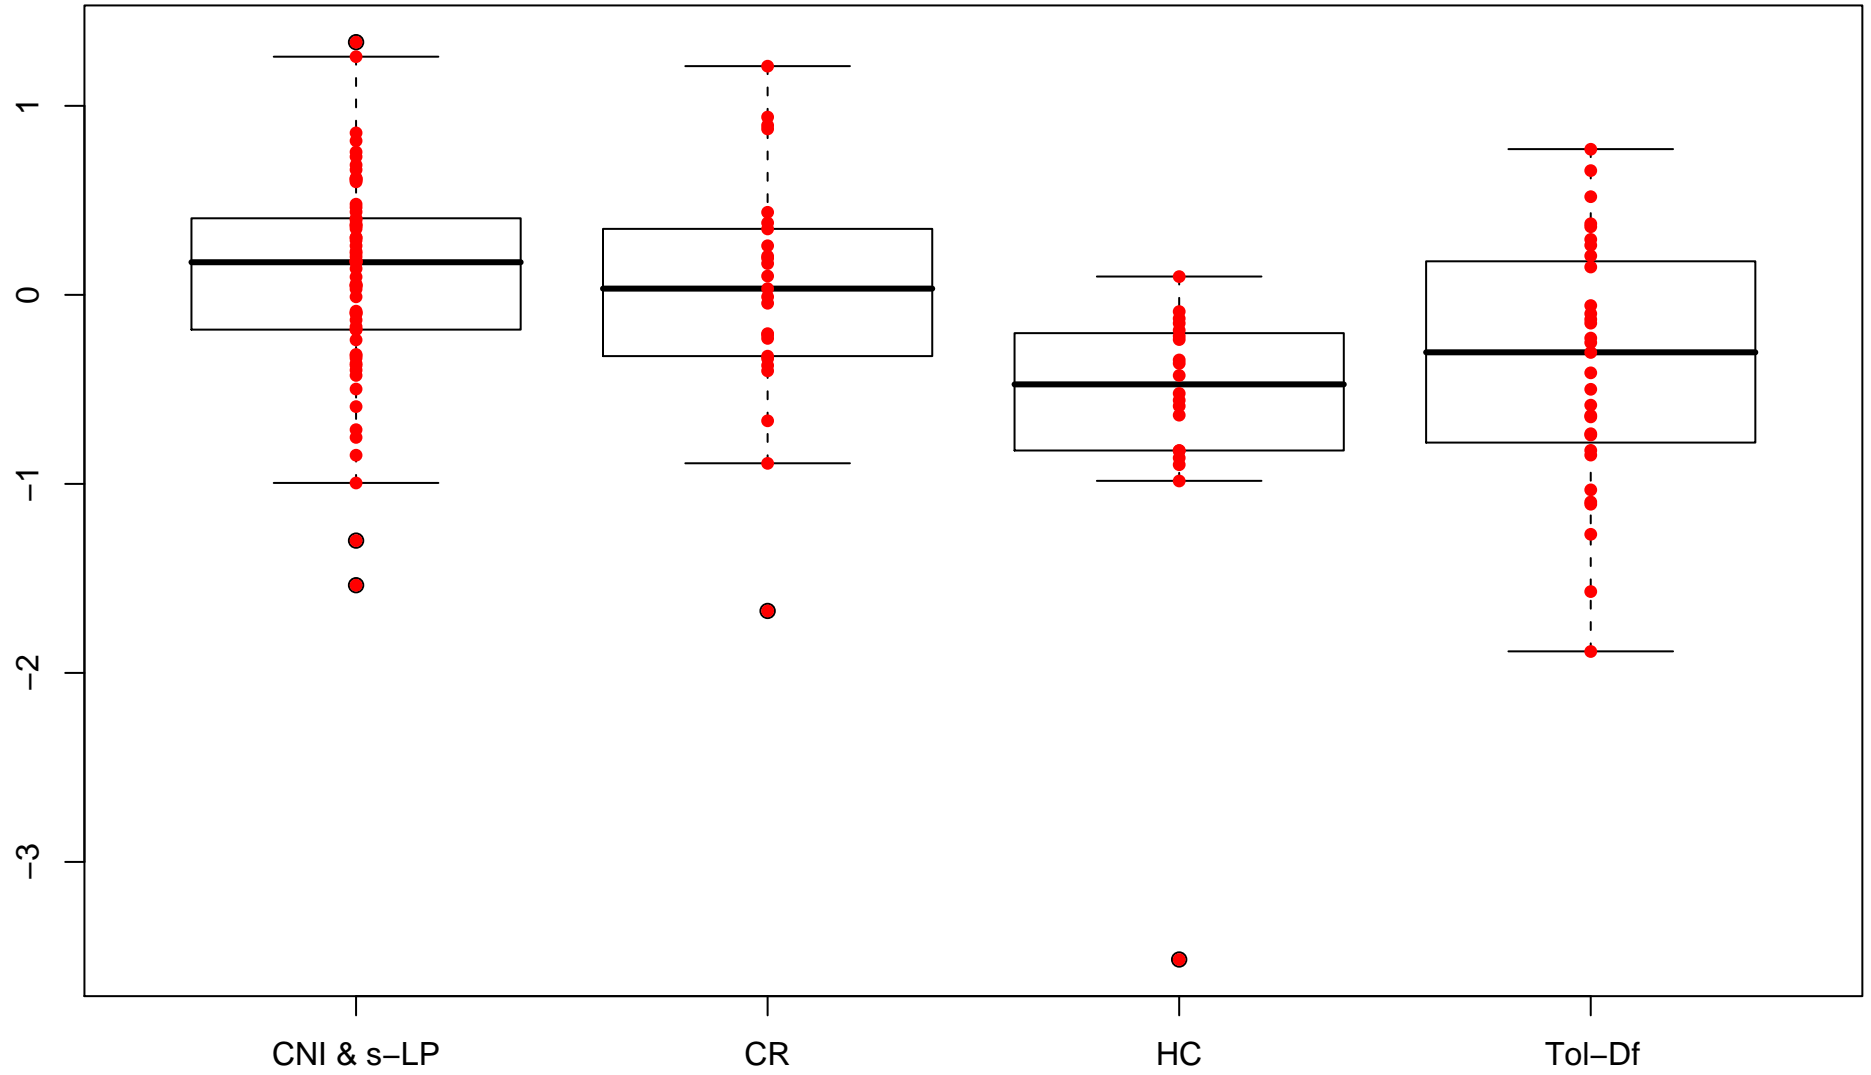

Rank 222 : PTHR1  
1.2226e-05

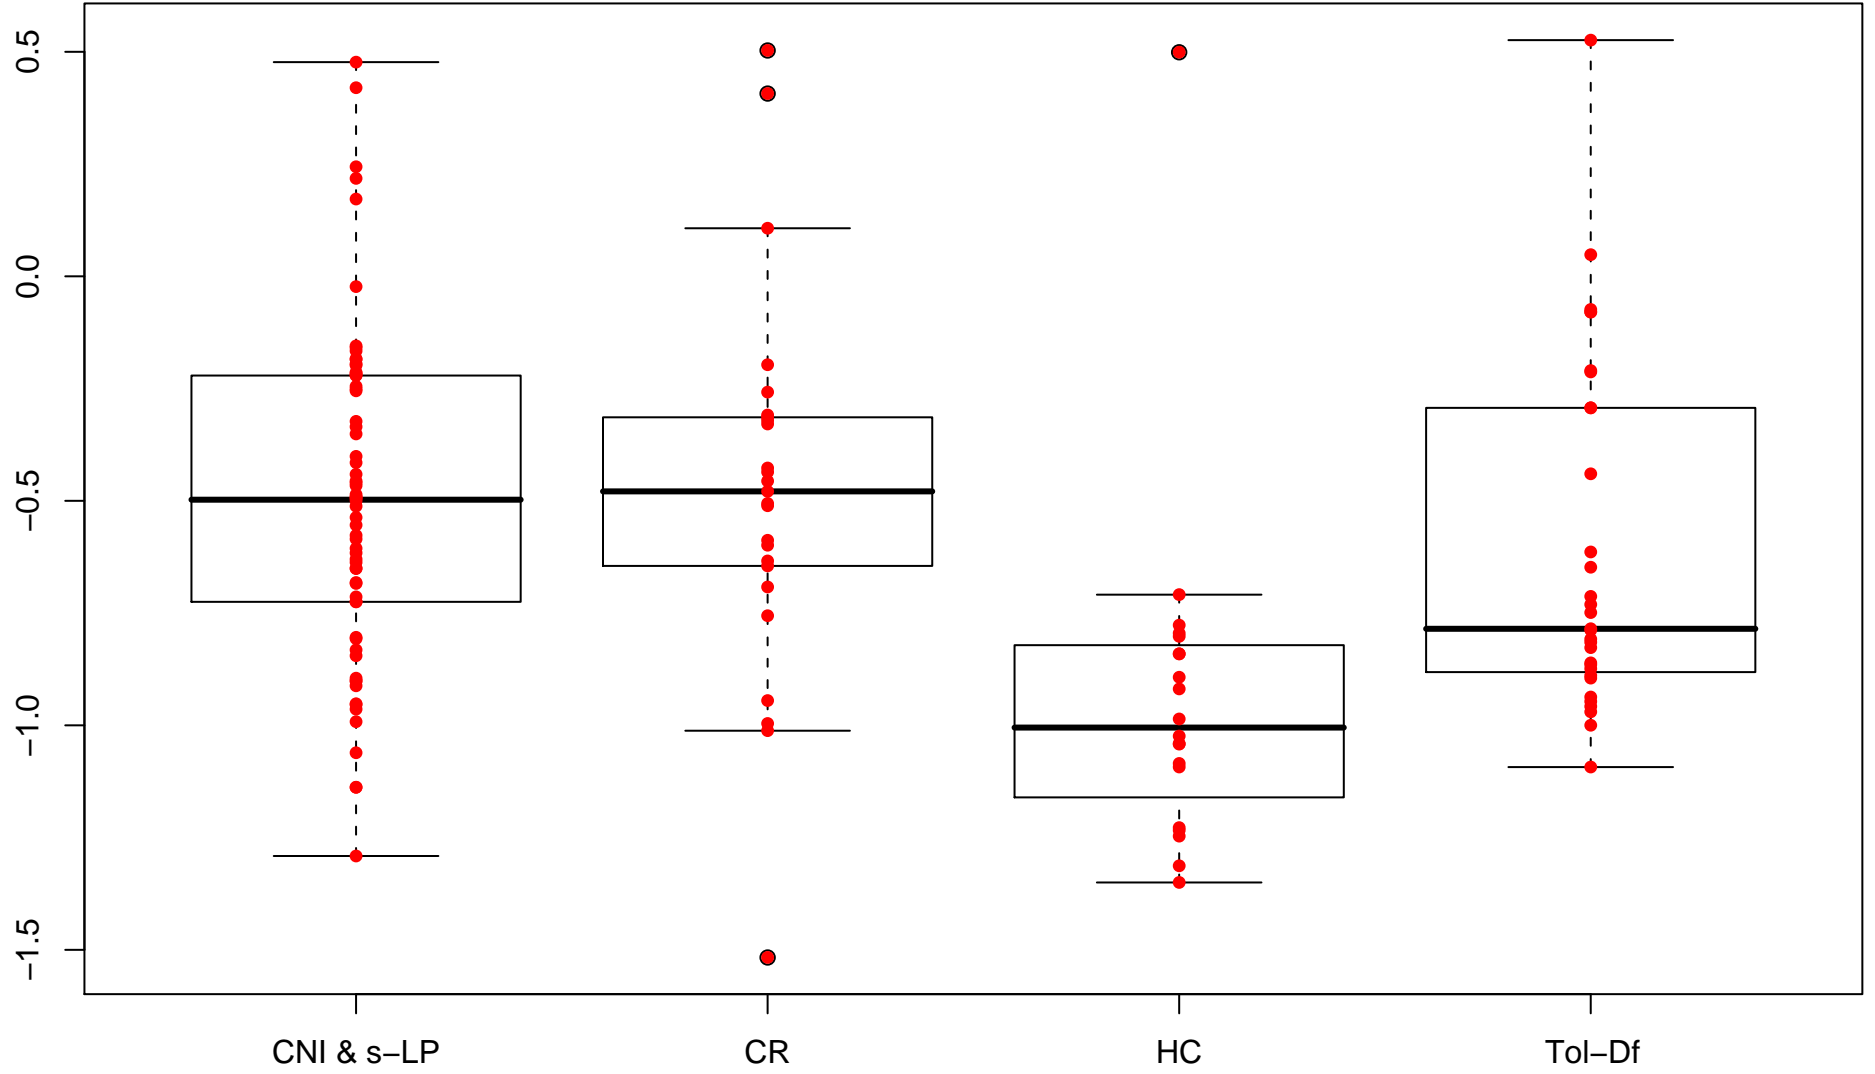

Rank 223 : ZNF14  
1.2432e-05

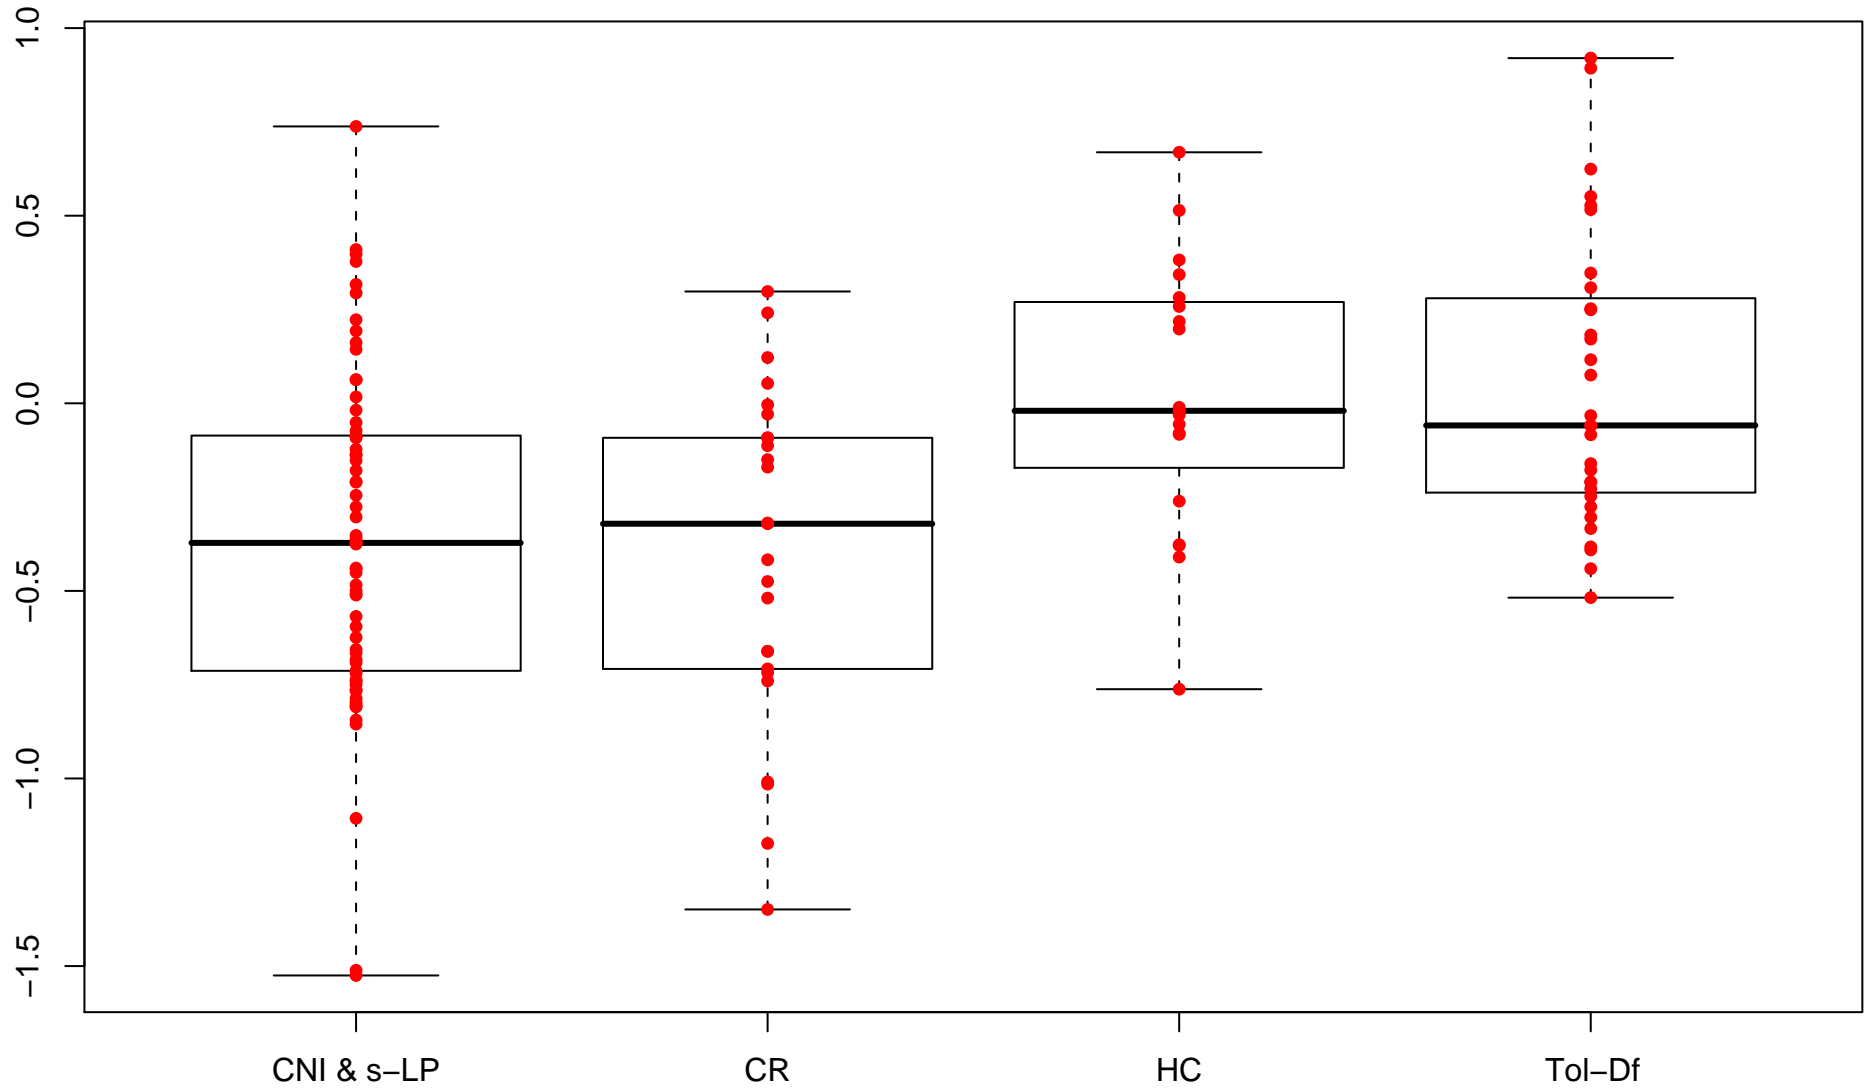



Rank 224 : ERG  
1.2491e-05

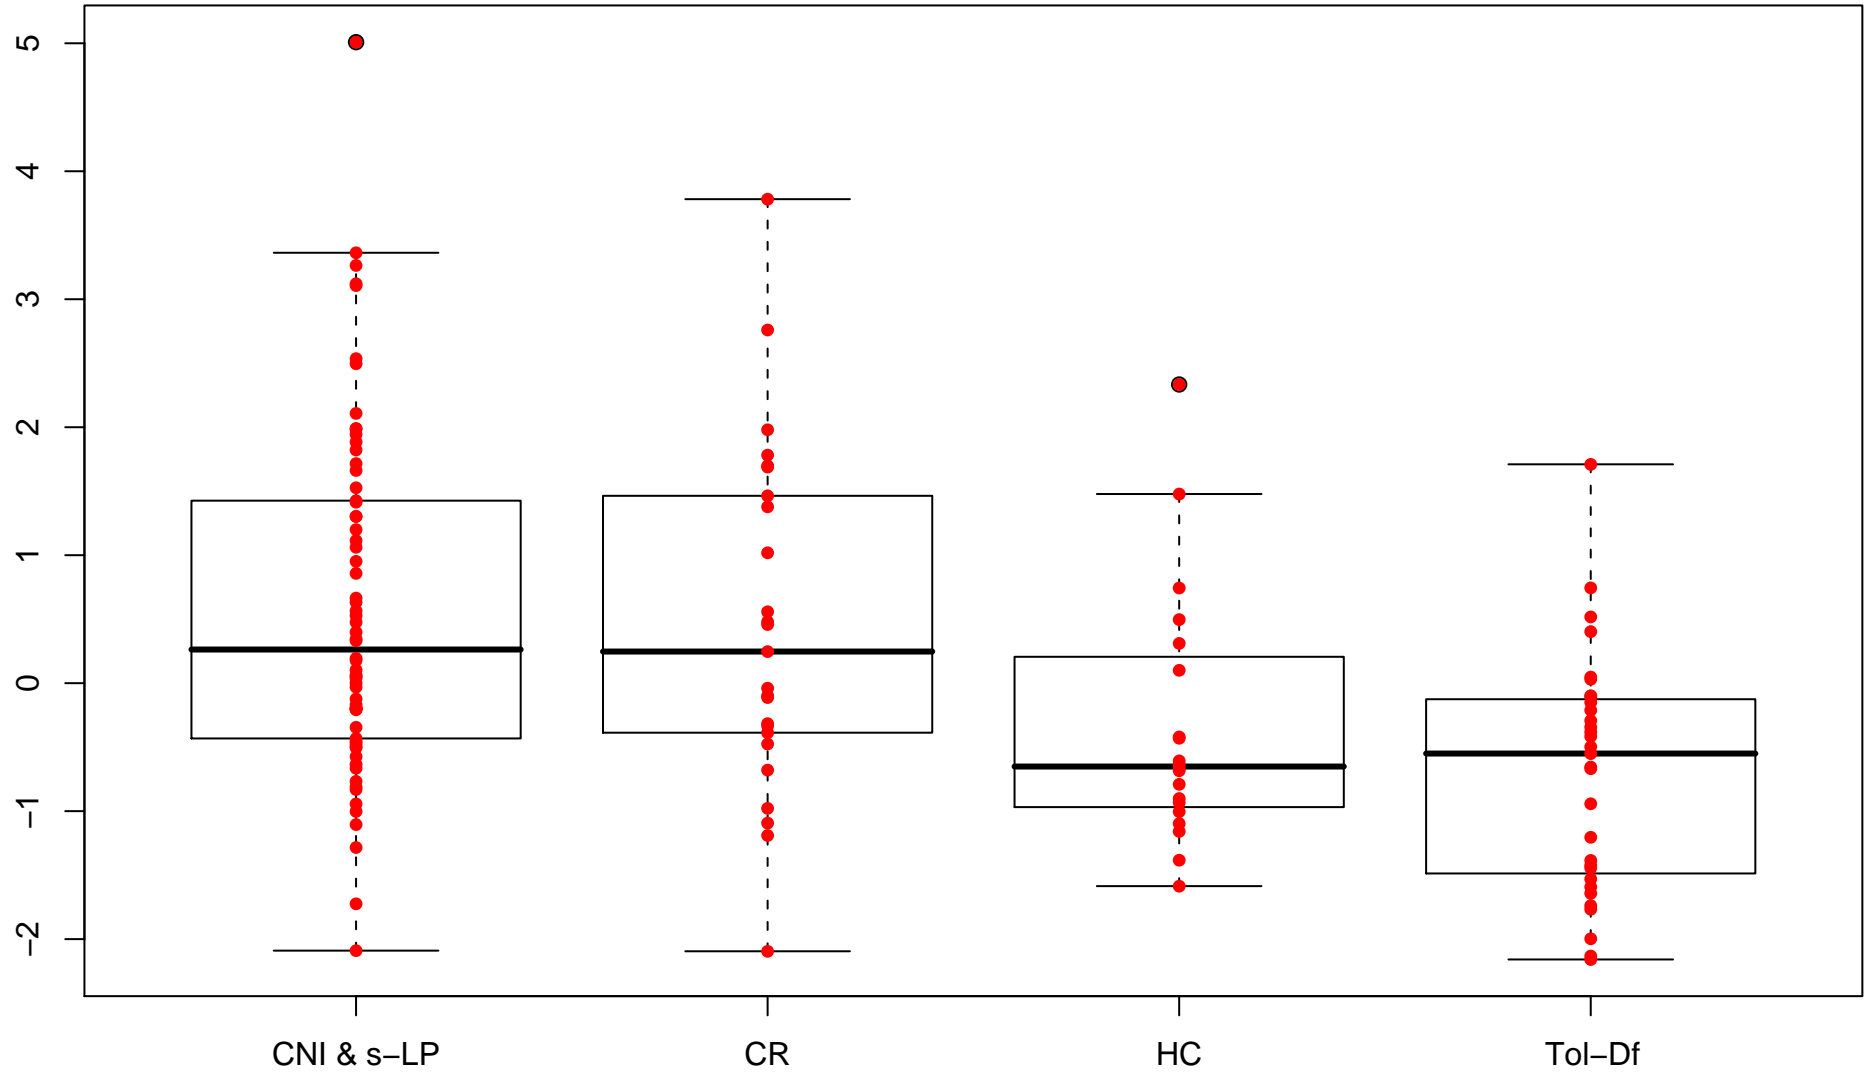

Rank 225 : IRF4  
1.2508e-05

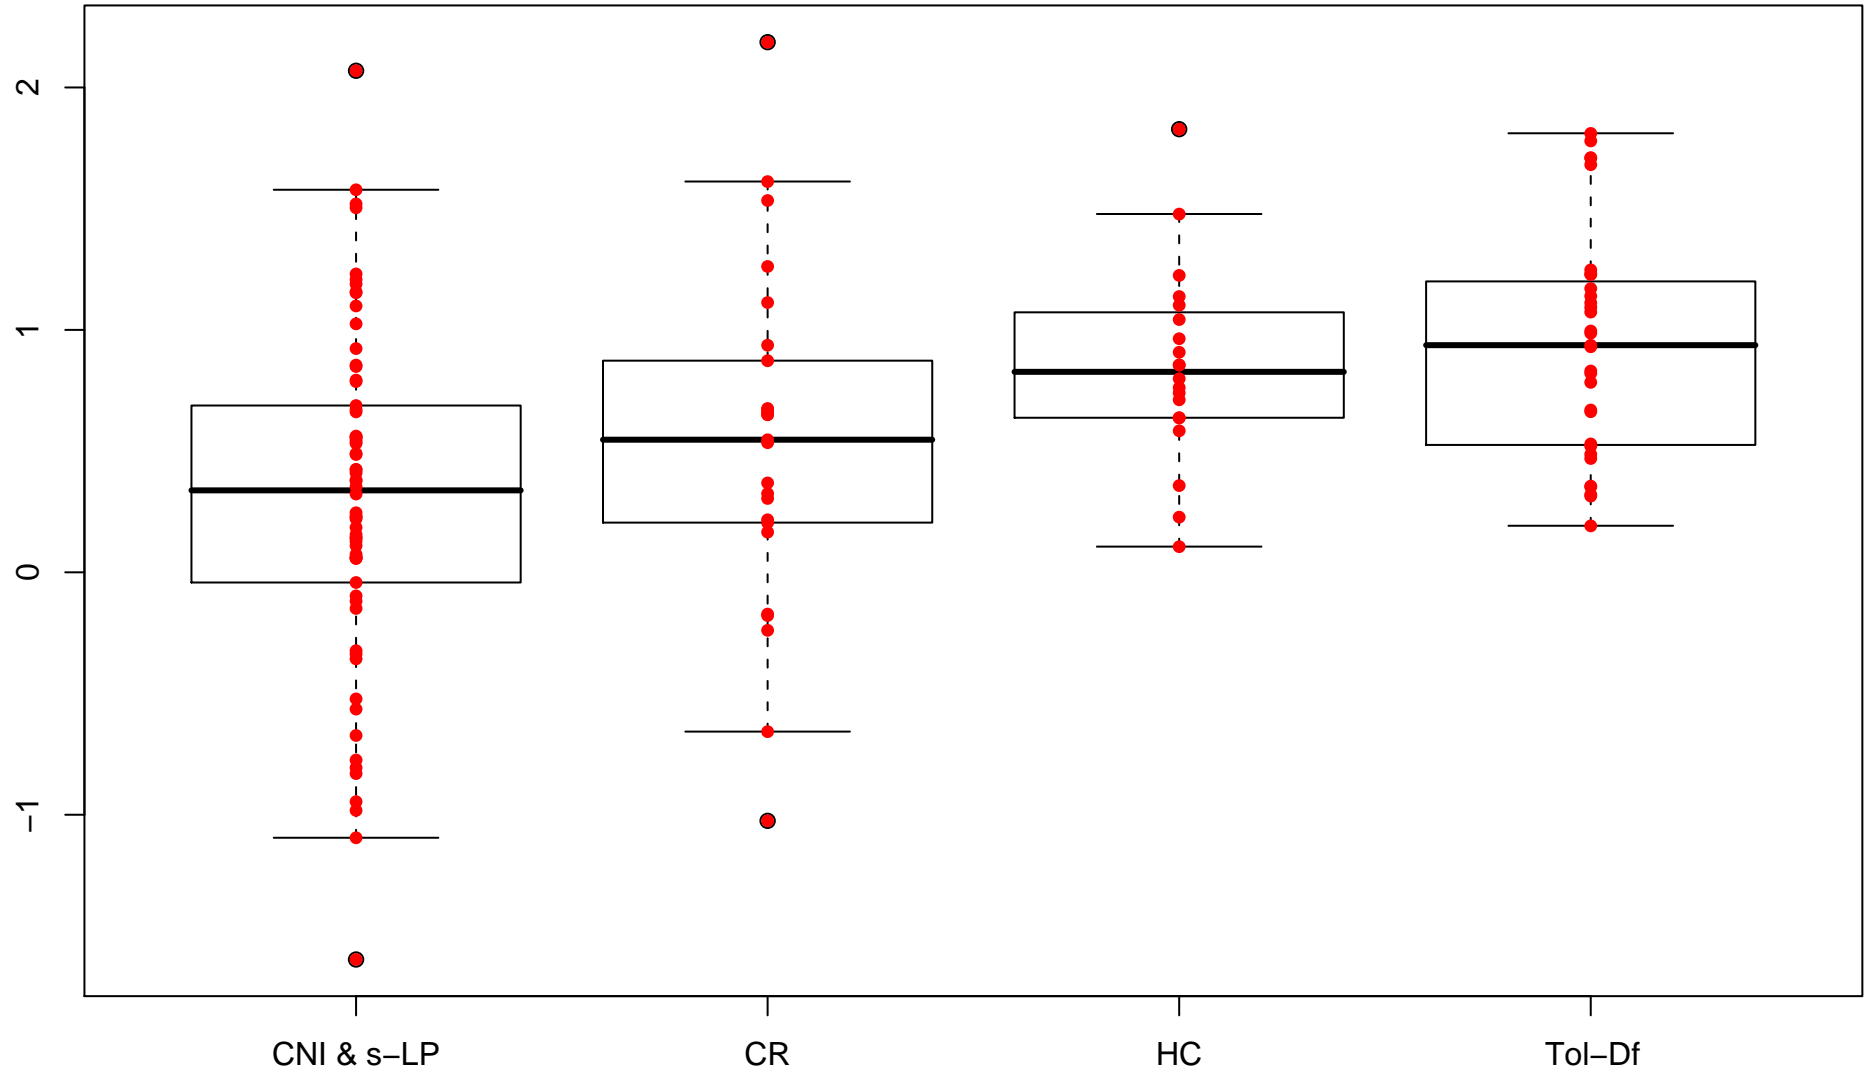

Rank 226 : TANK  
1.2831e-05

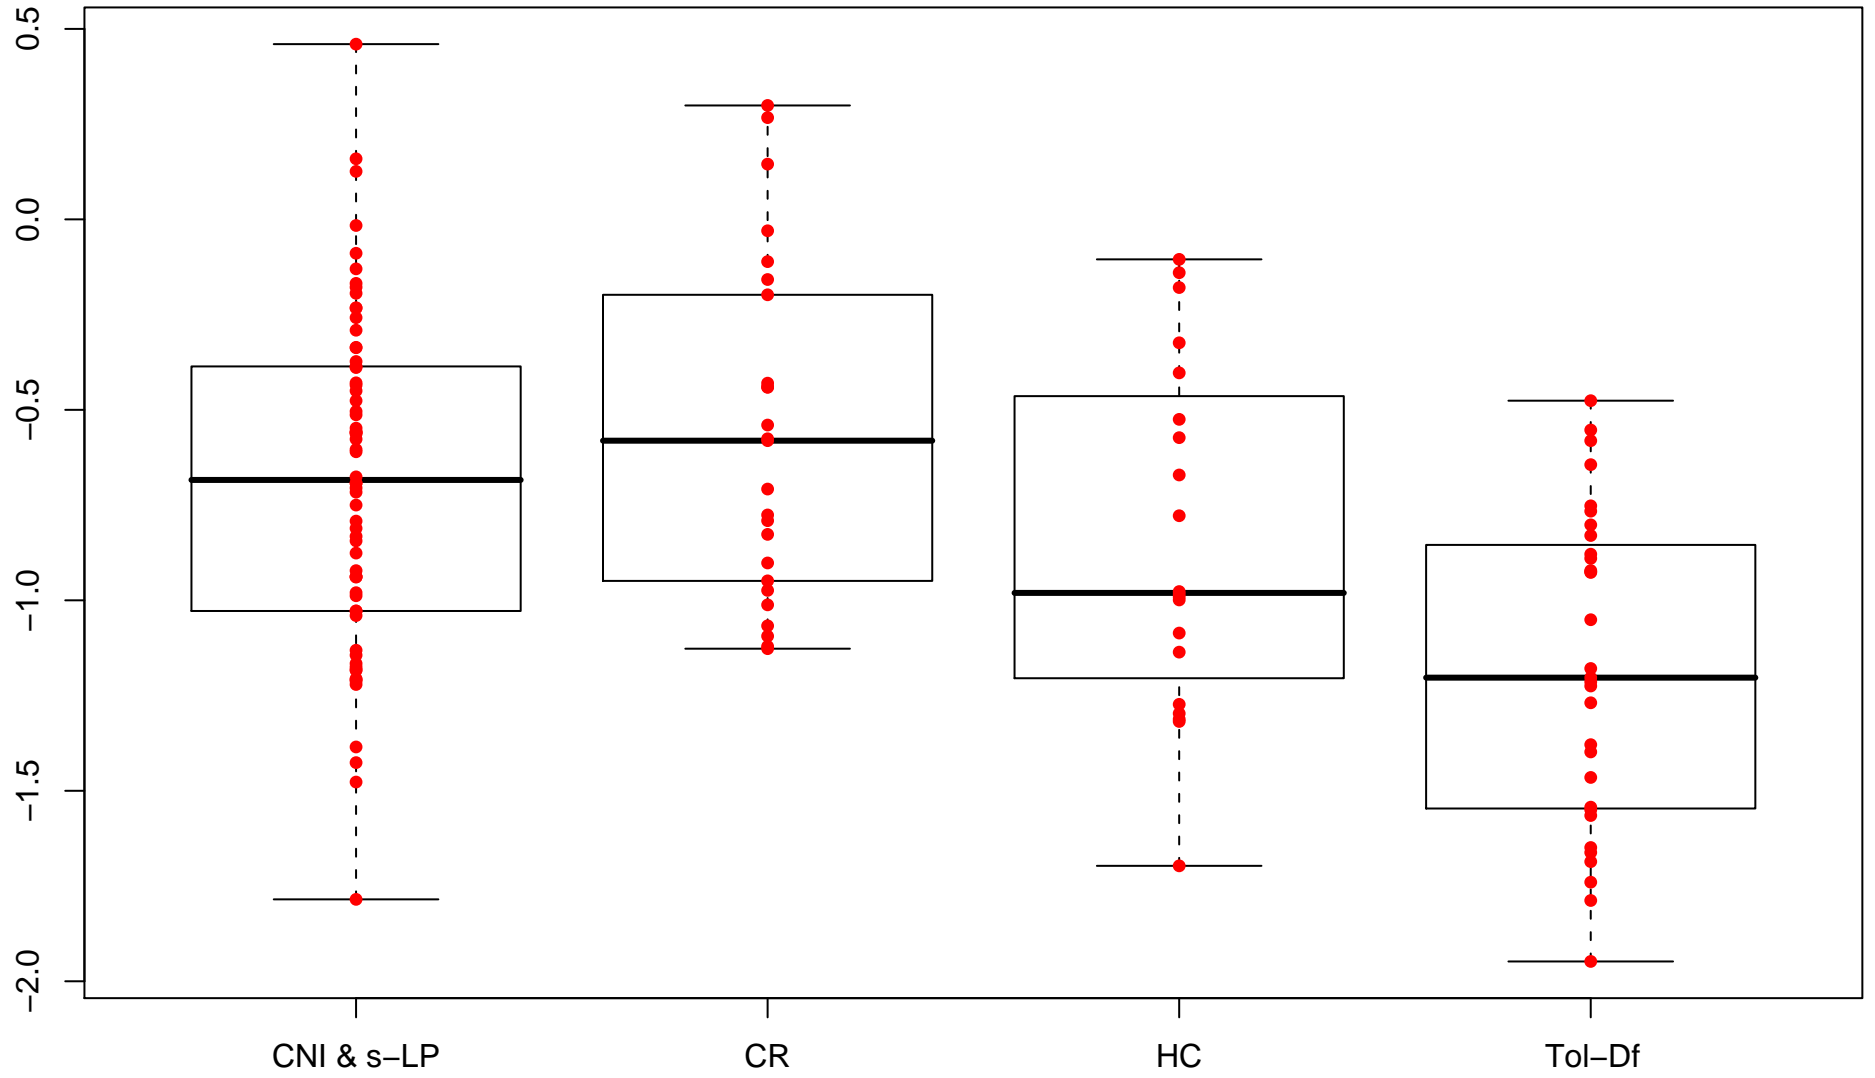

Rank 227 : TRIM4  
1.284e-05

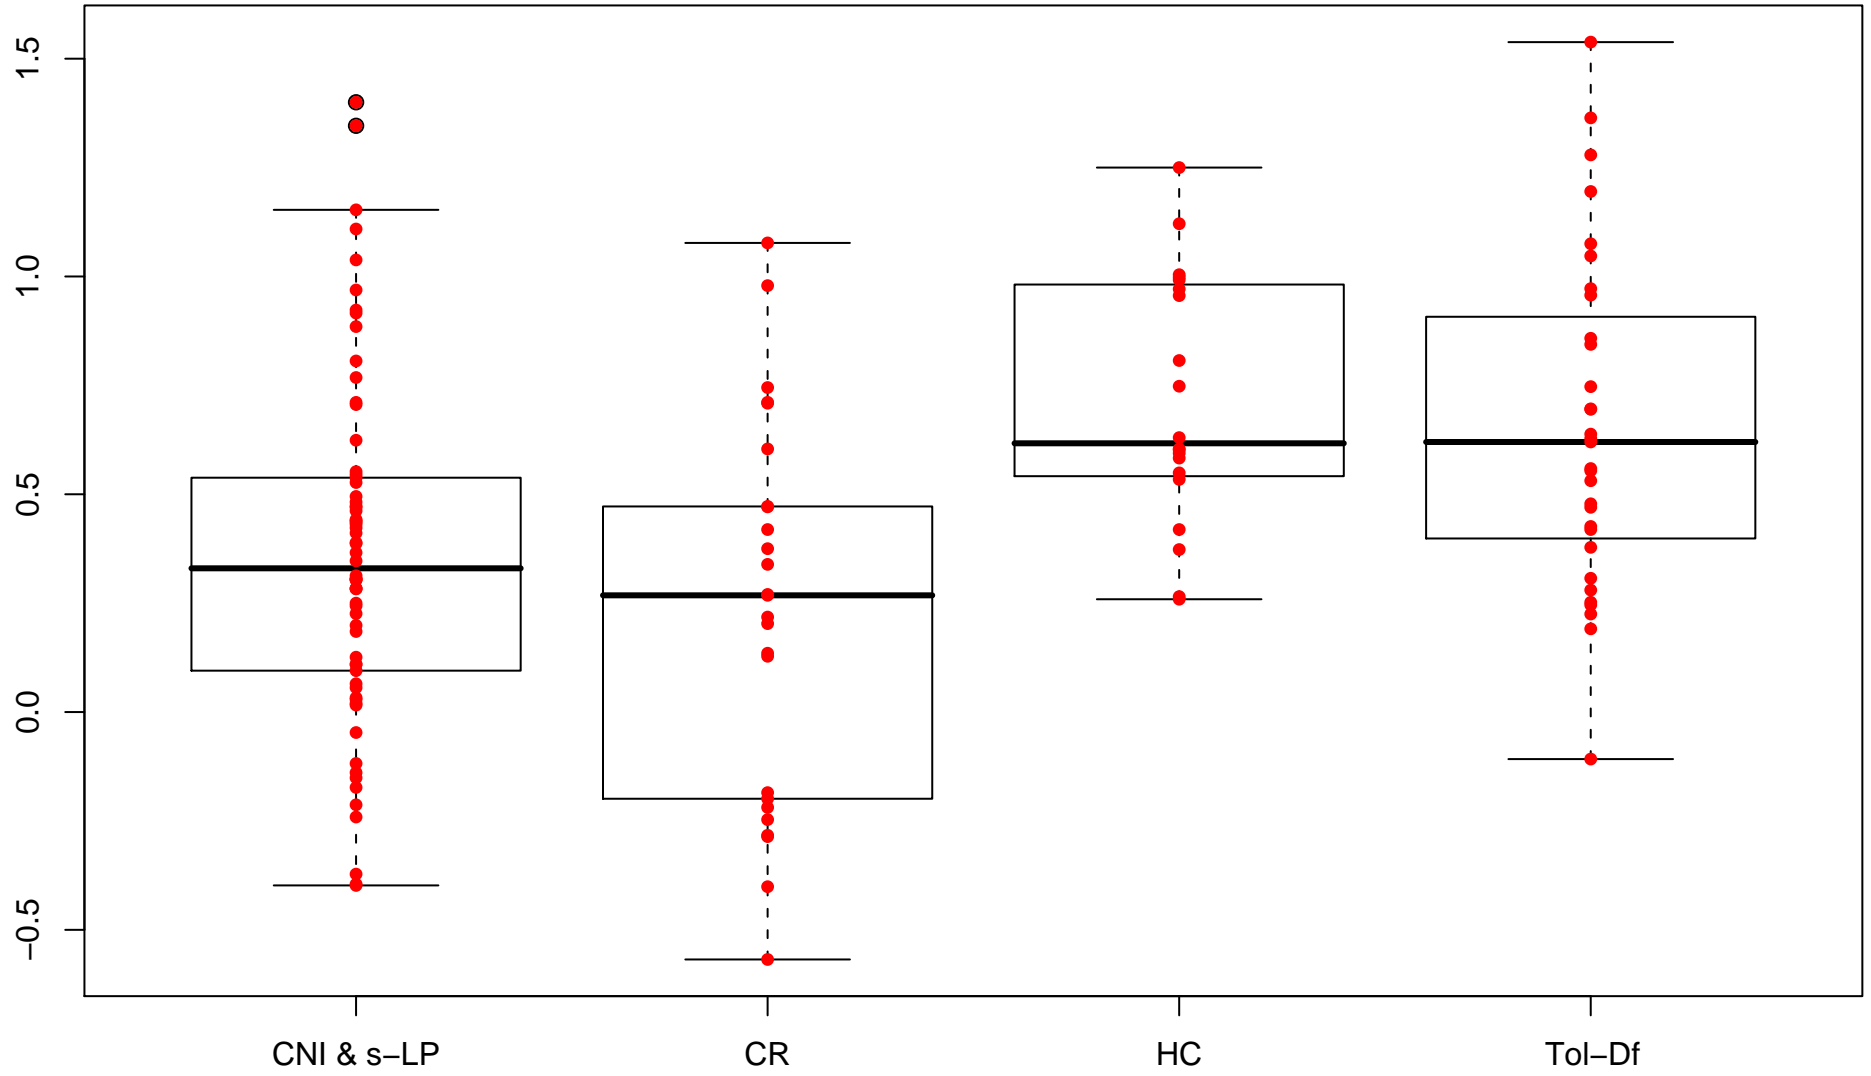

Rank 228 : AMFR  
1.2921e-05

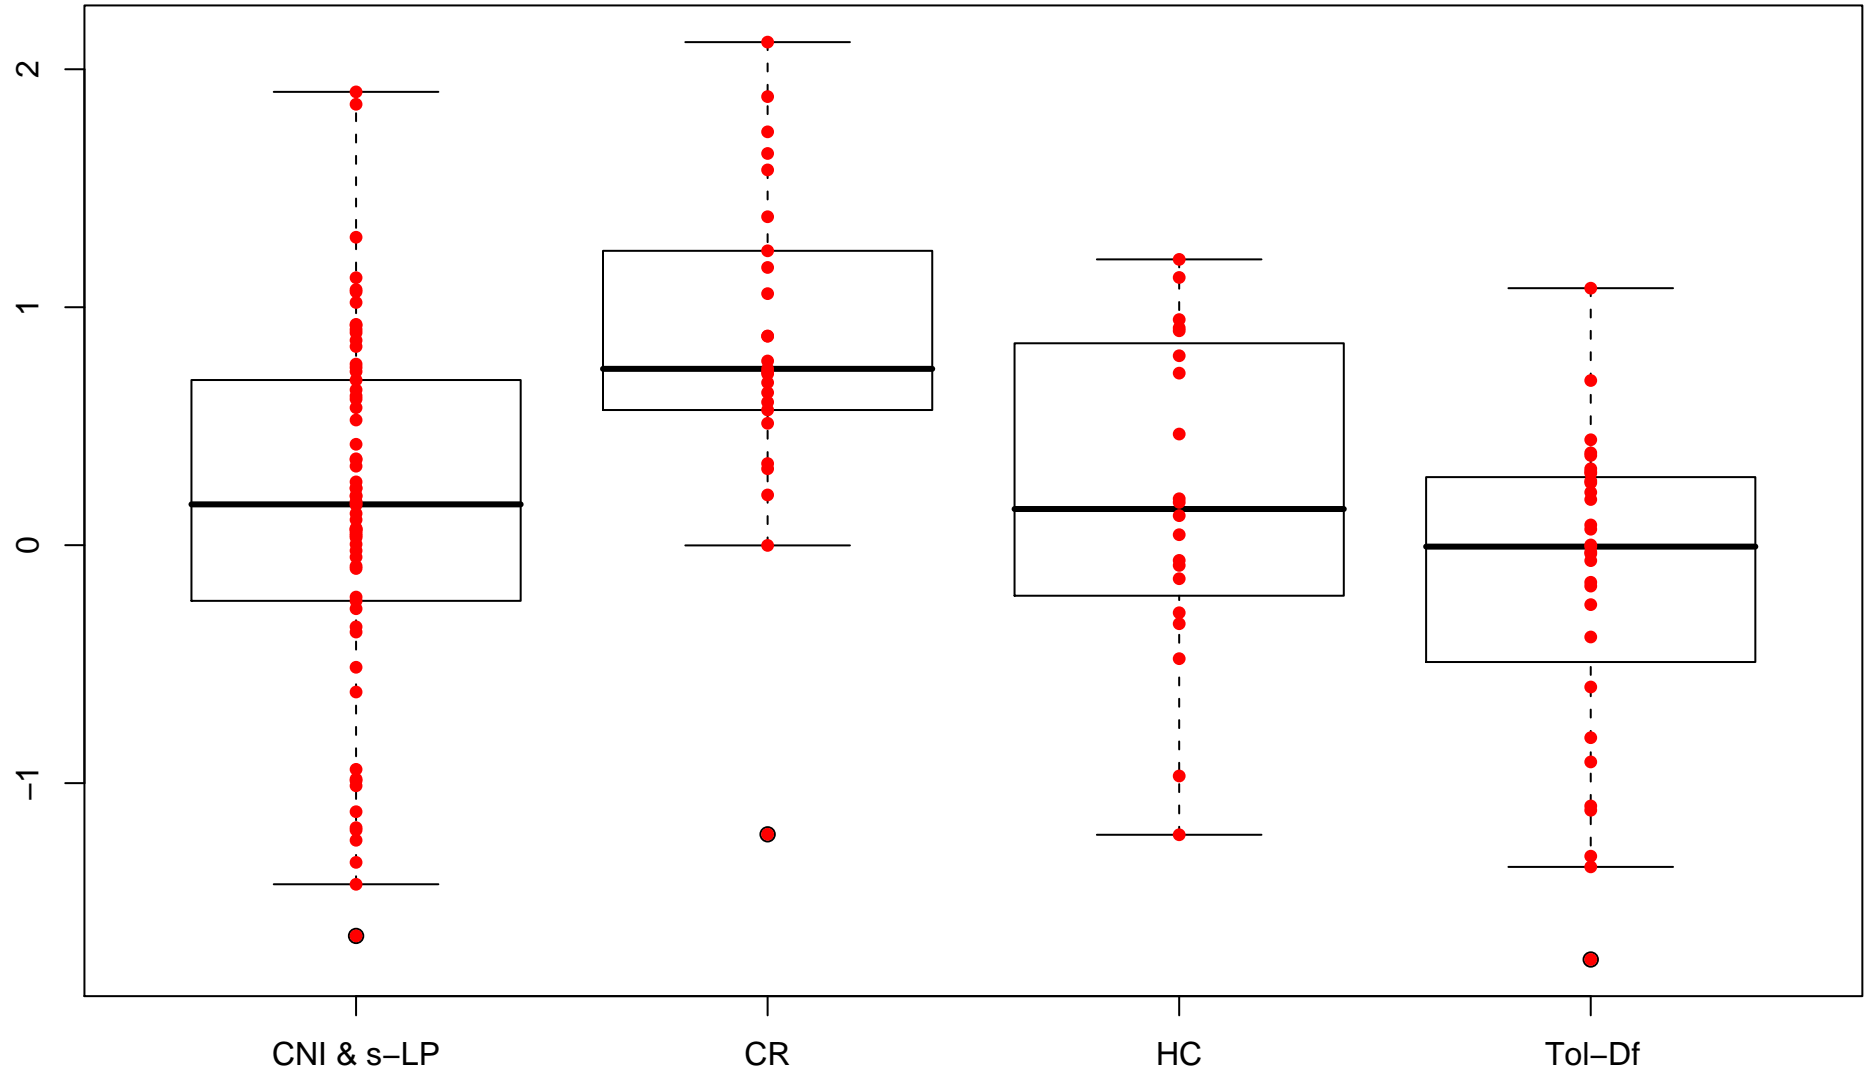

Rank 229 : HLTF  
1.2938e-05

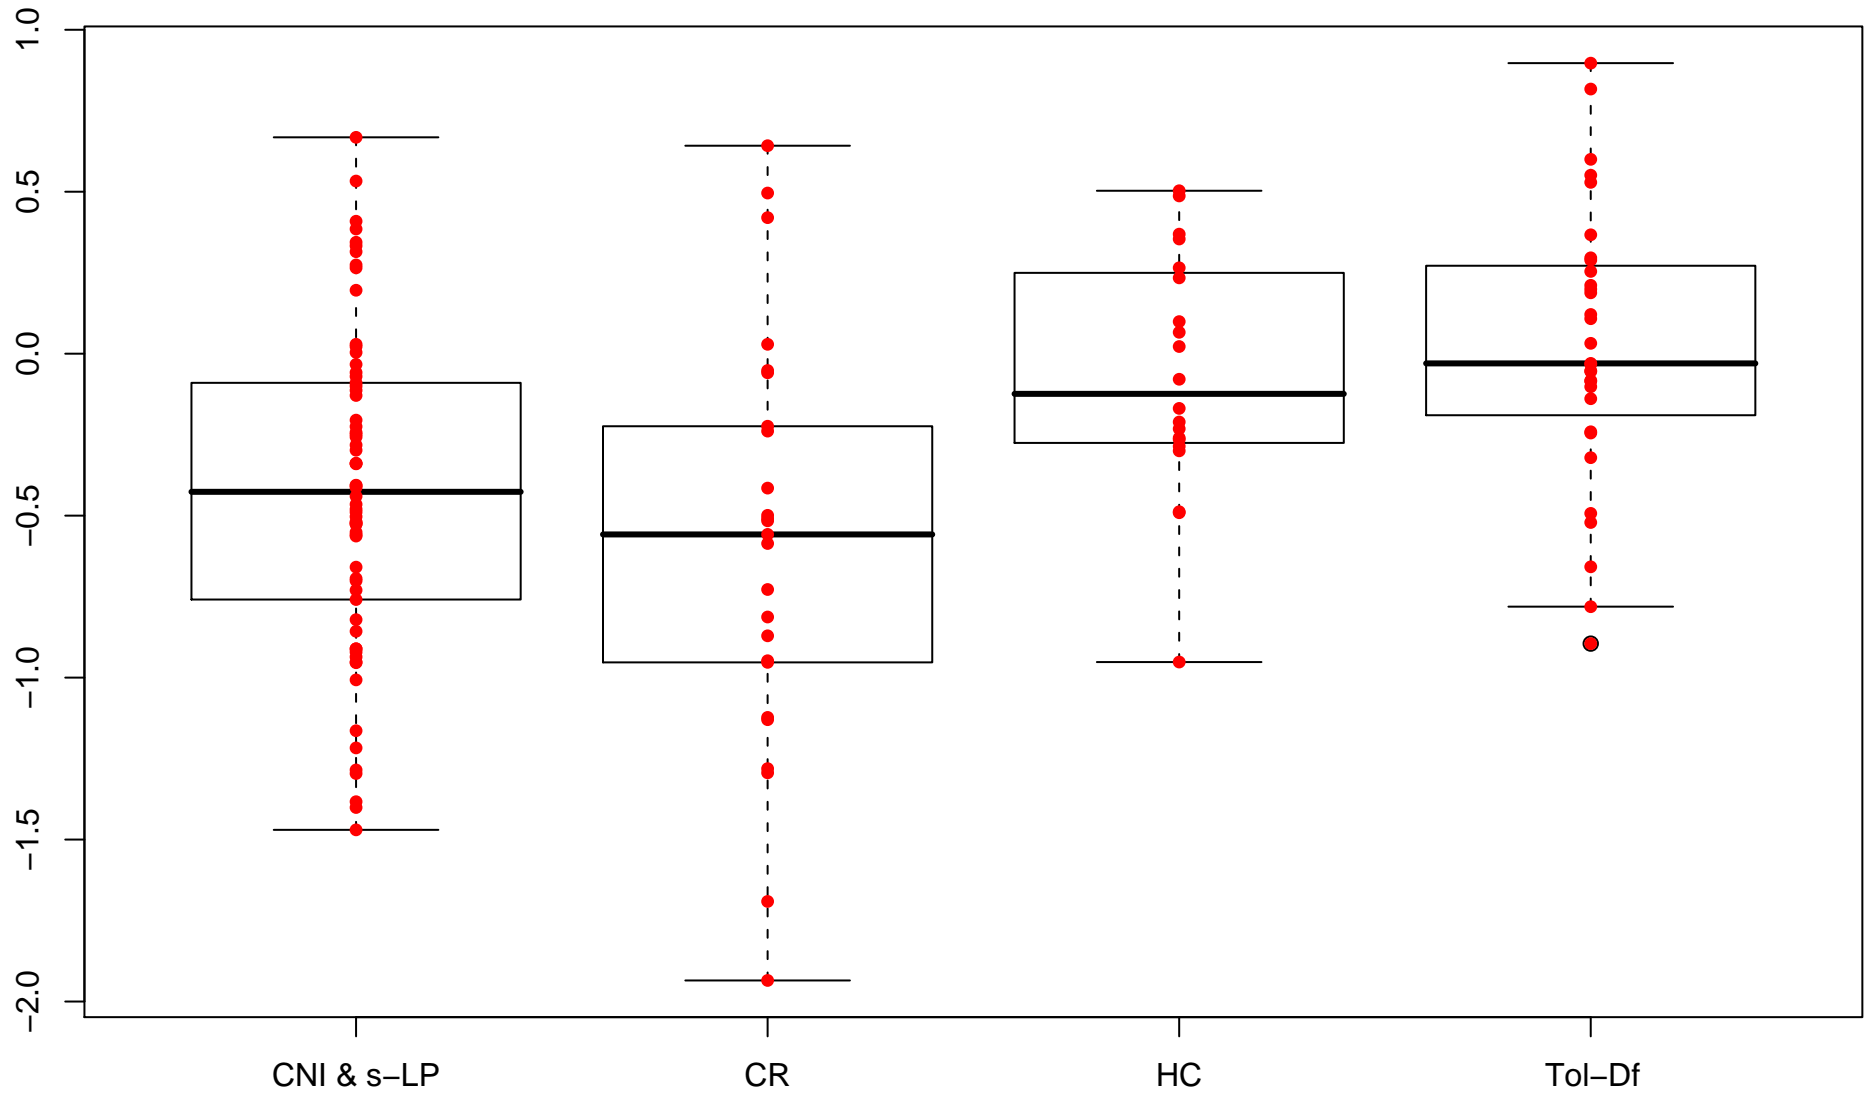

Rank 230 : CD6  
1.3208e-05

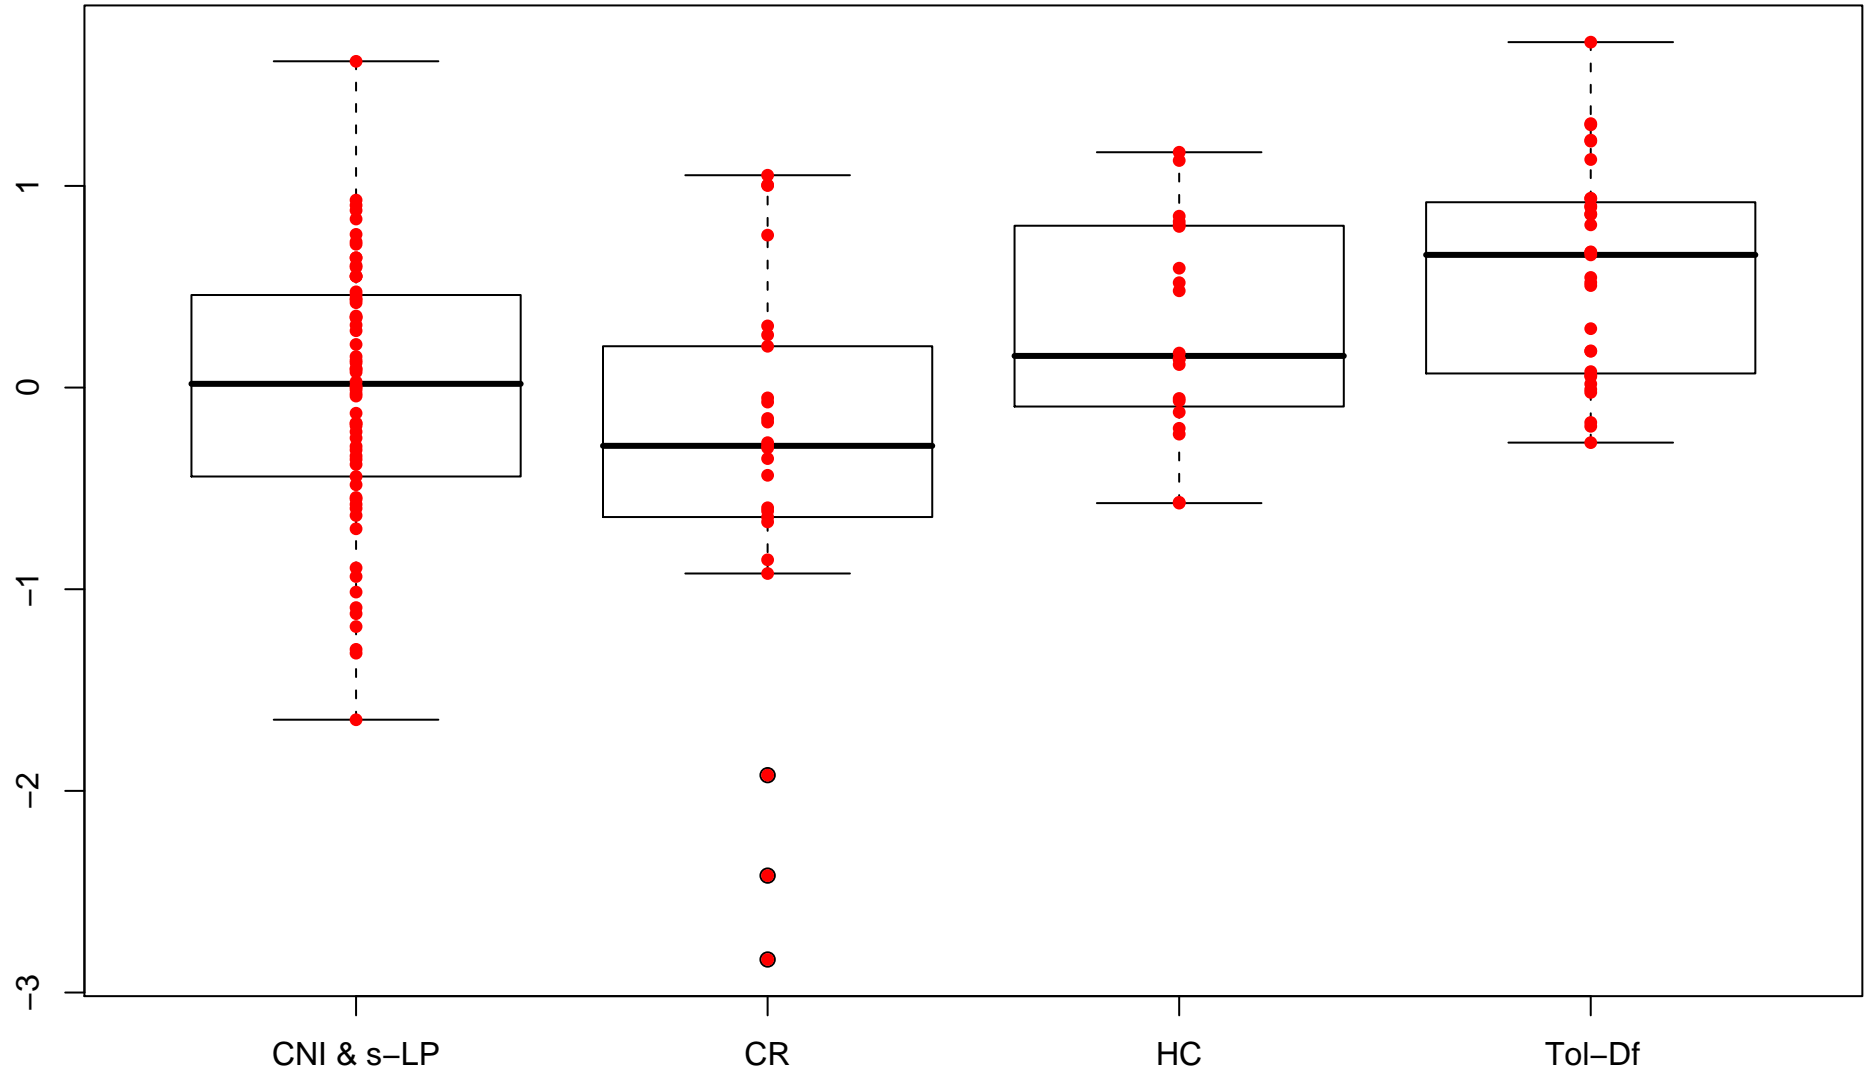

Rank 231 : ANXA3  
1.3766e-05

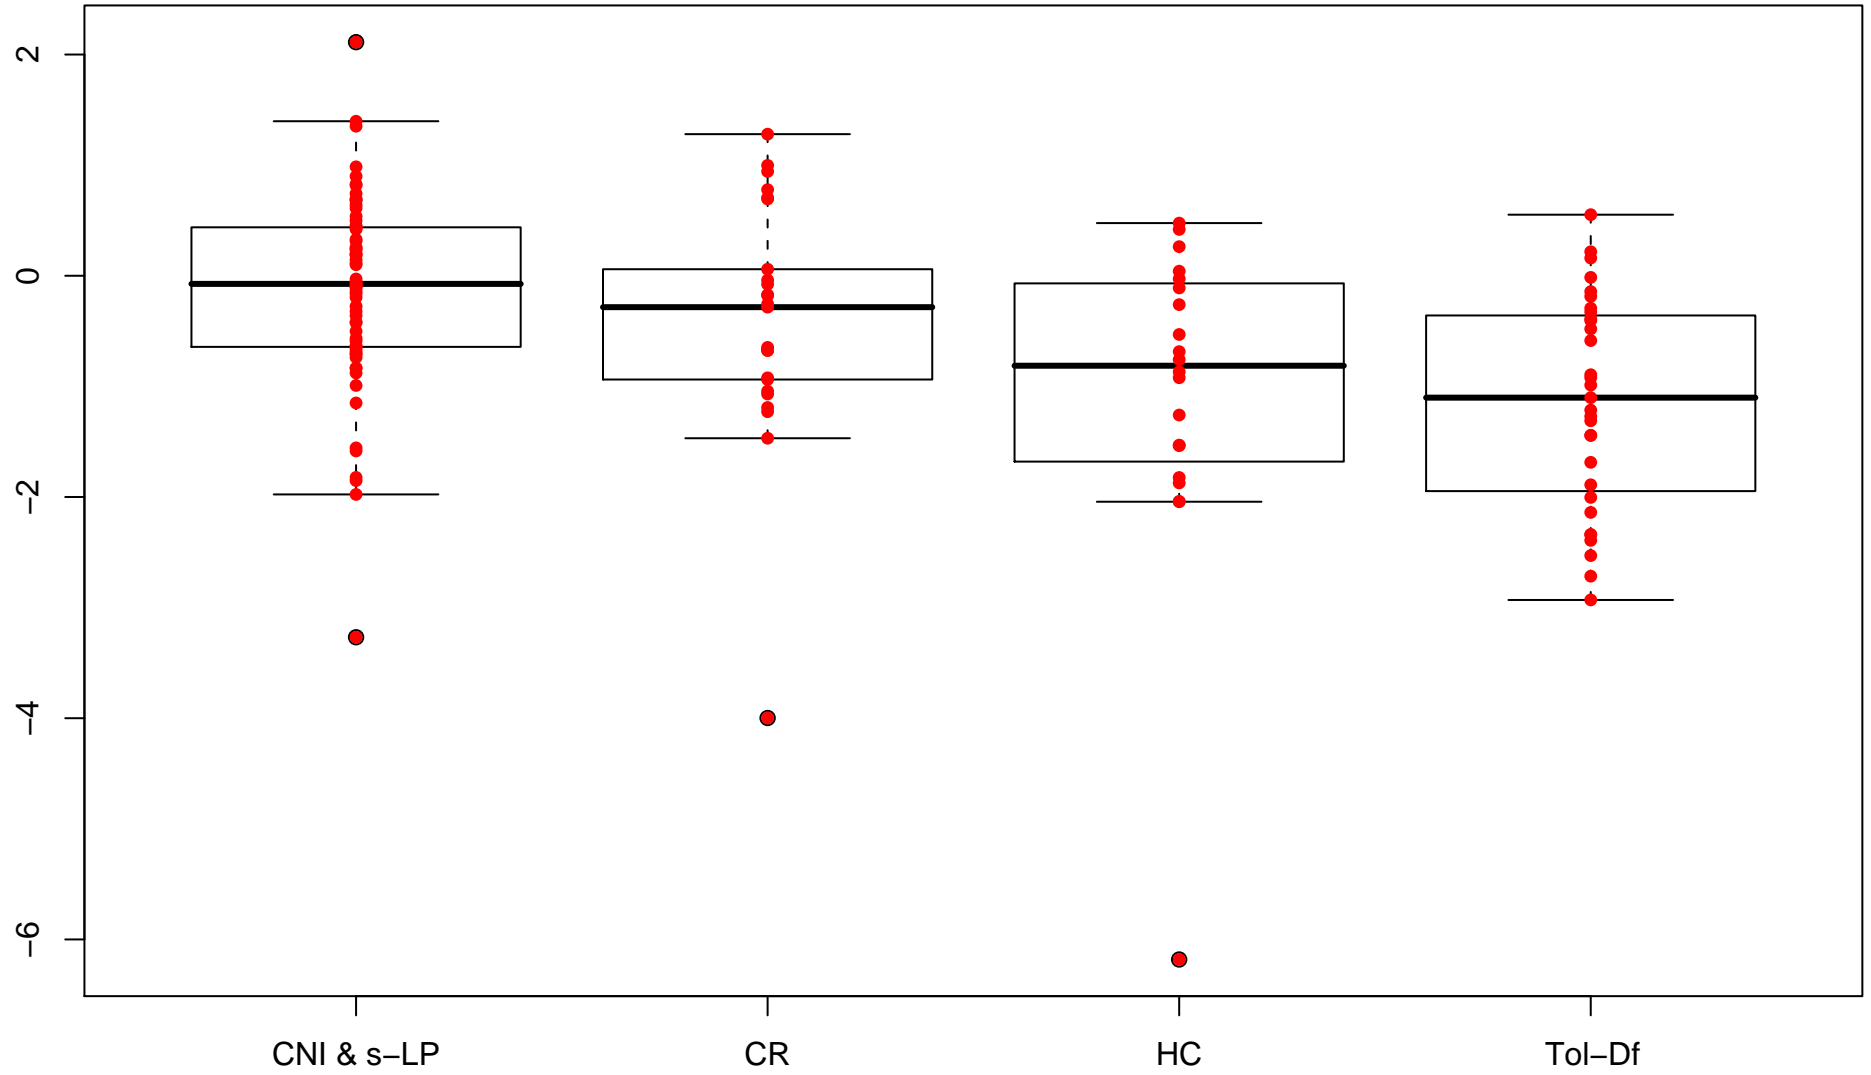



Rank 232 : C6ORF108  
1.3792e-05

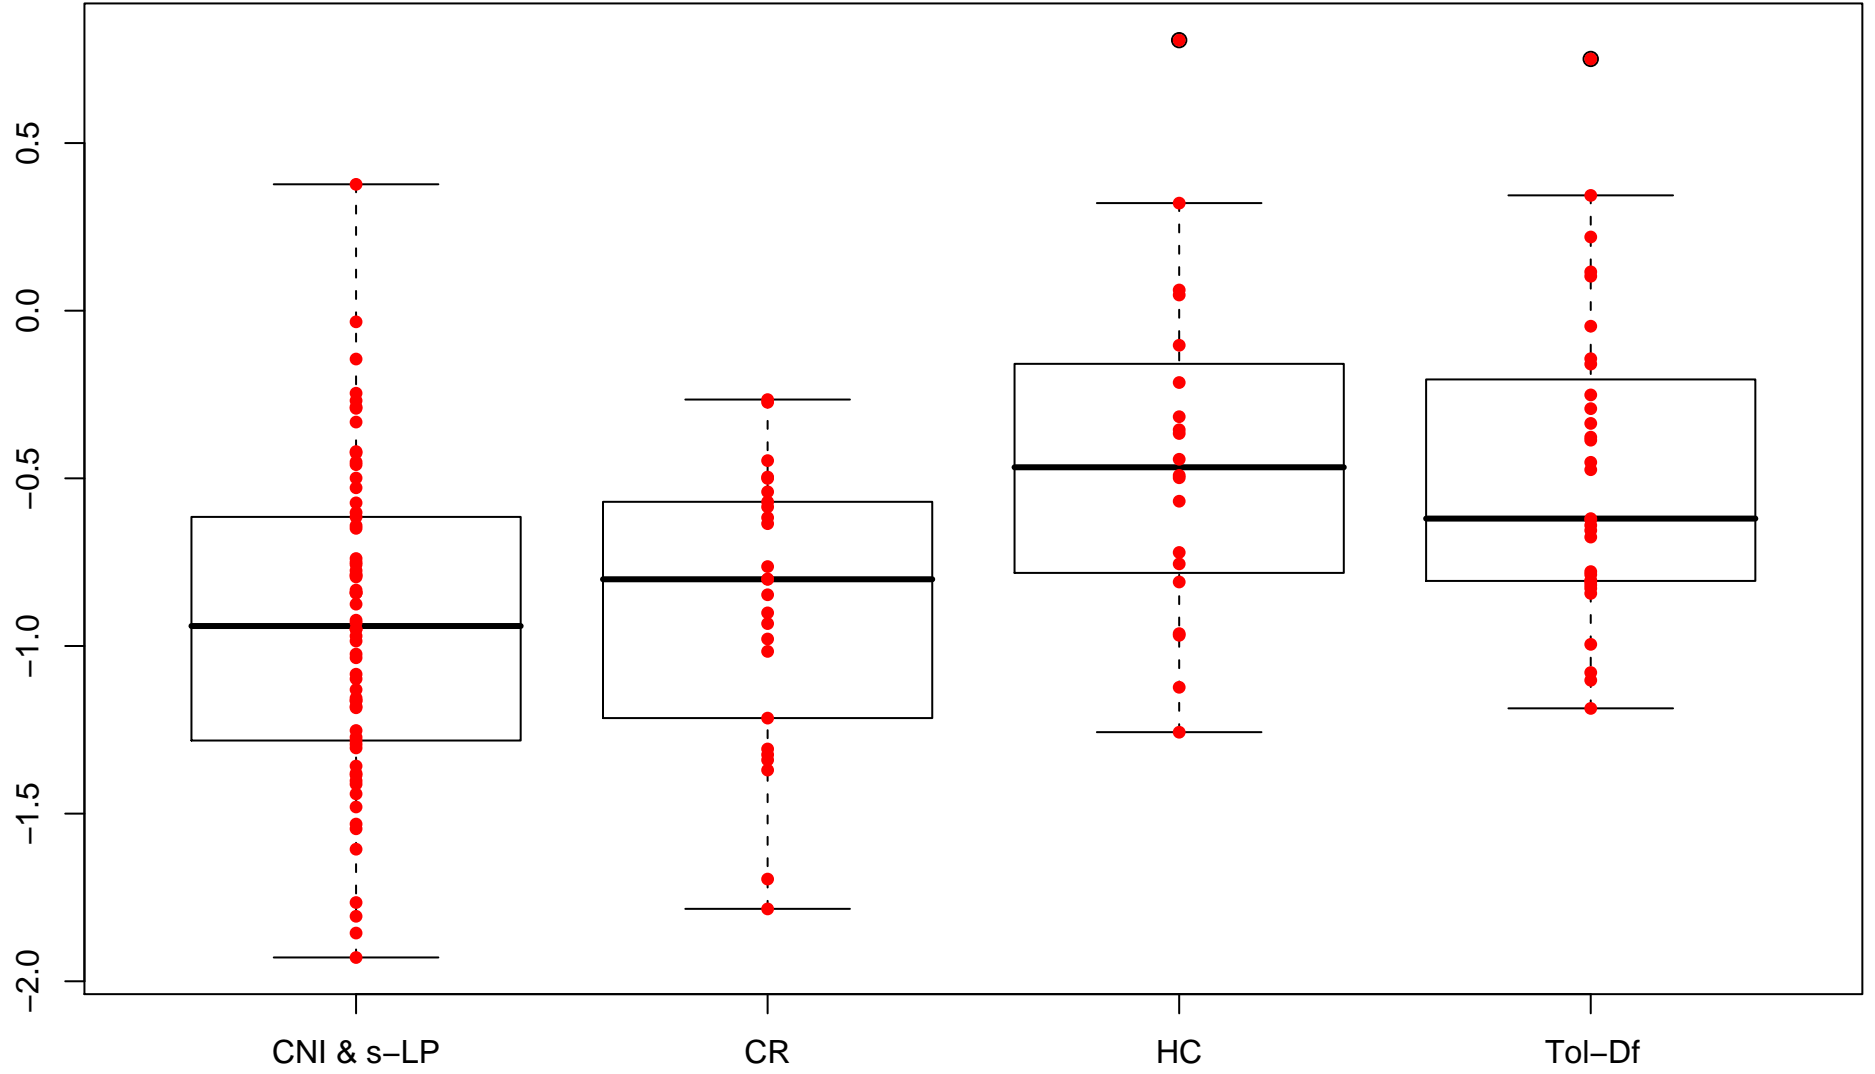

Rank 233 : CLC  
1.3868e-05

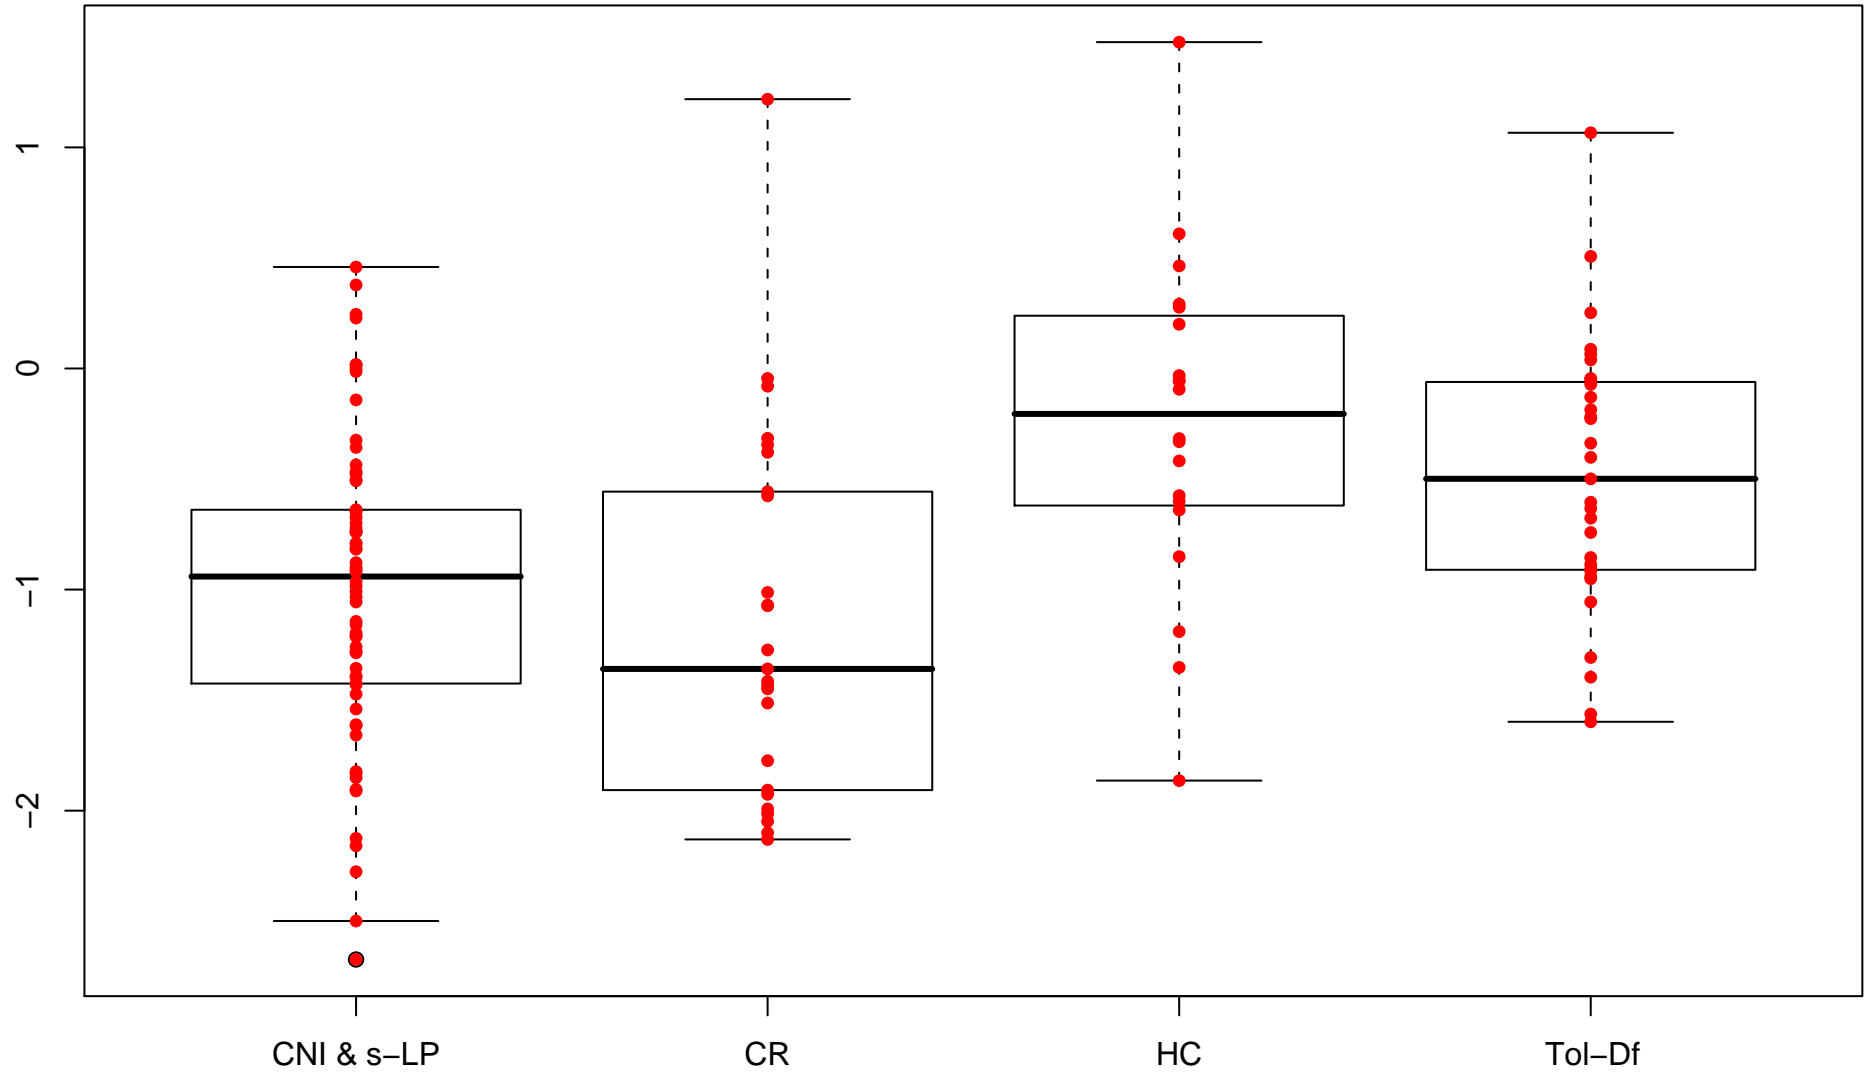

Rank 234 : AUTS2  
1.3994e-05

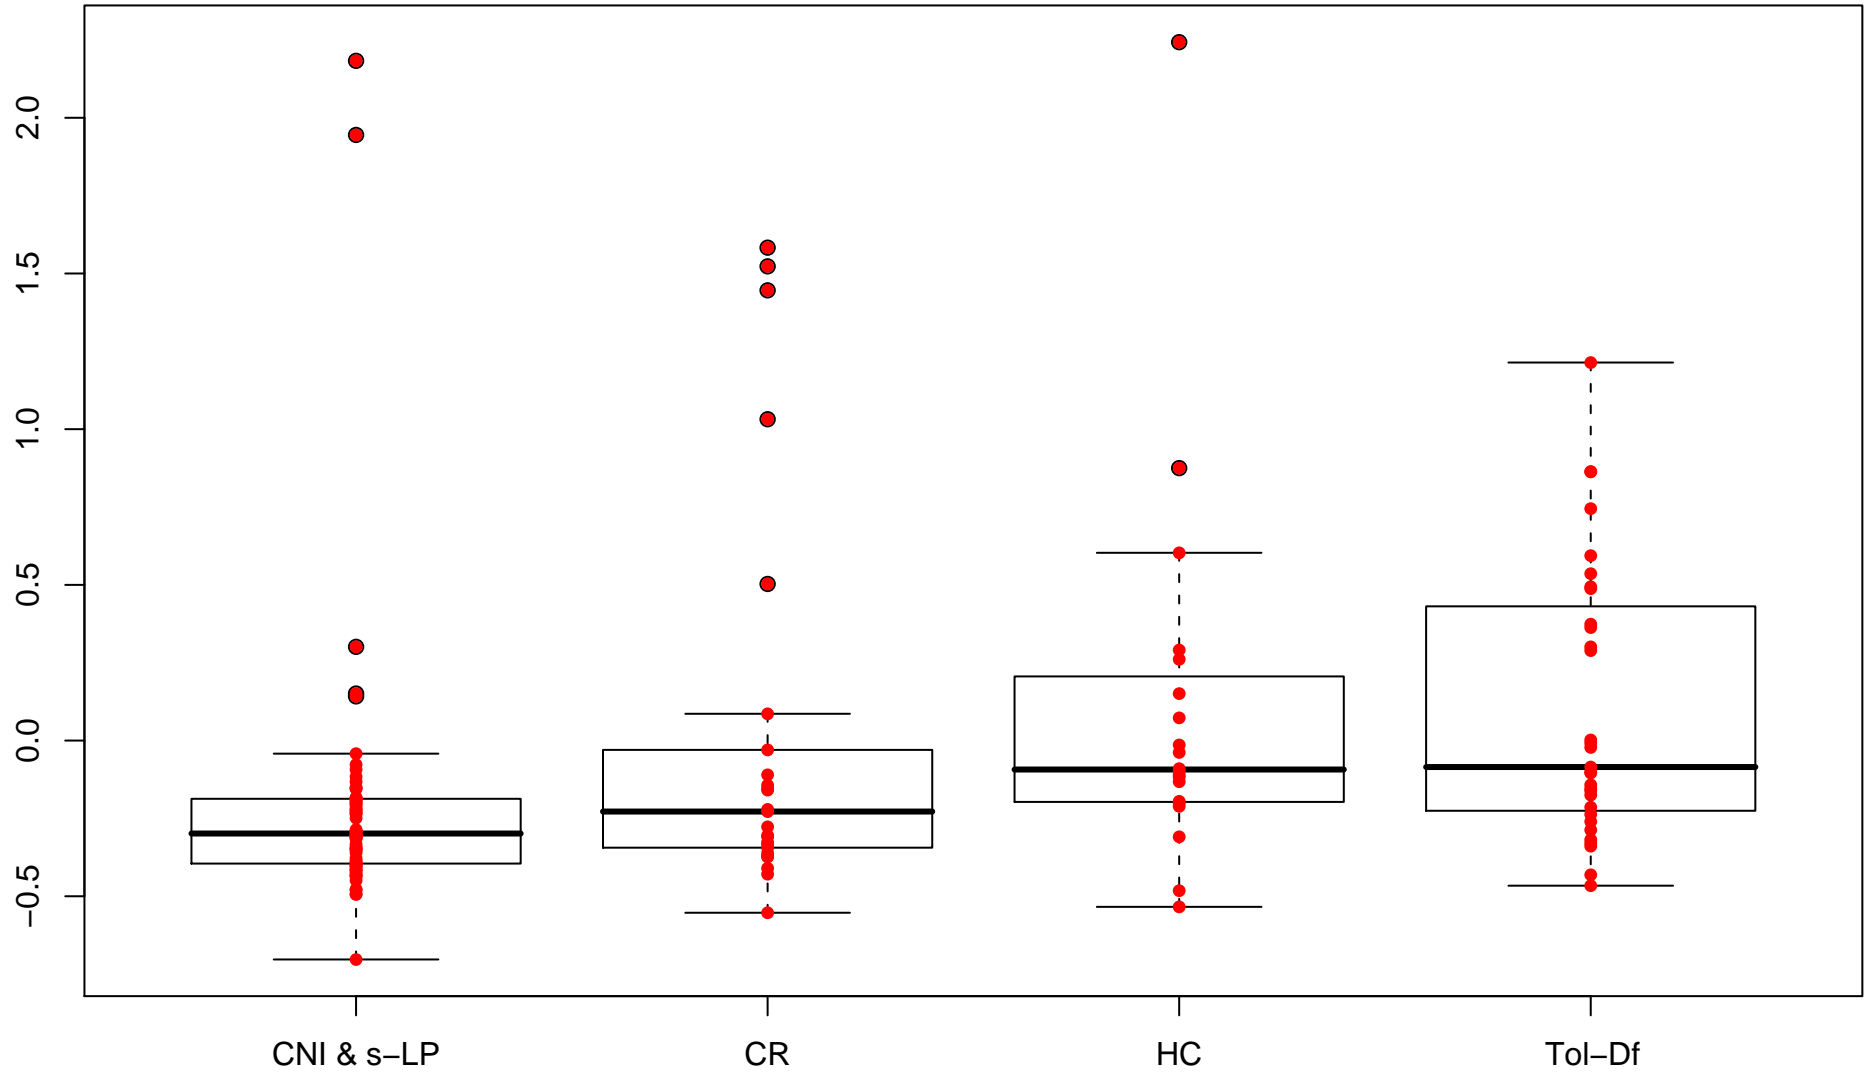

Rank 235 : ZNF549  
1.4311e-05

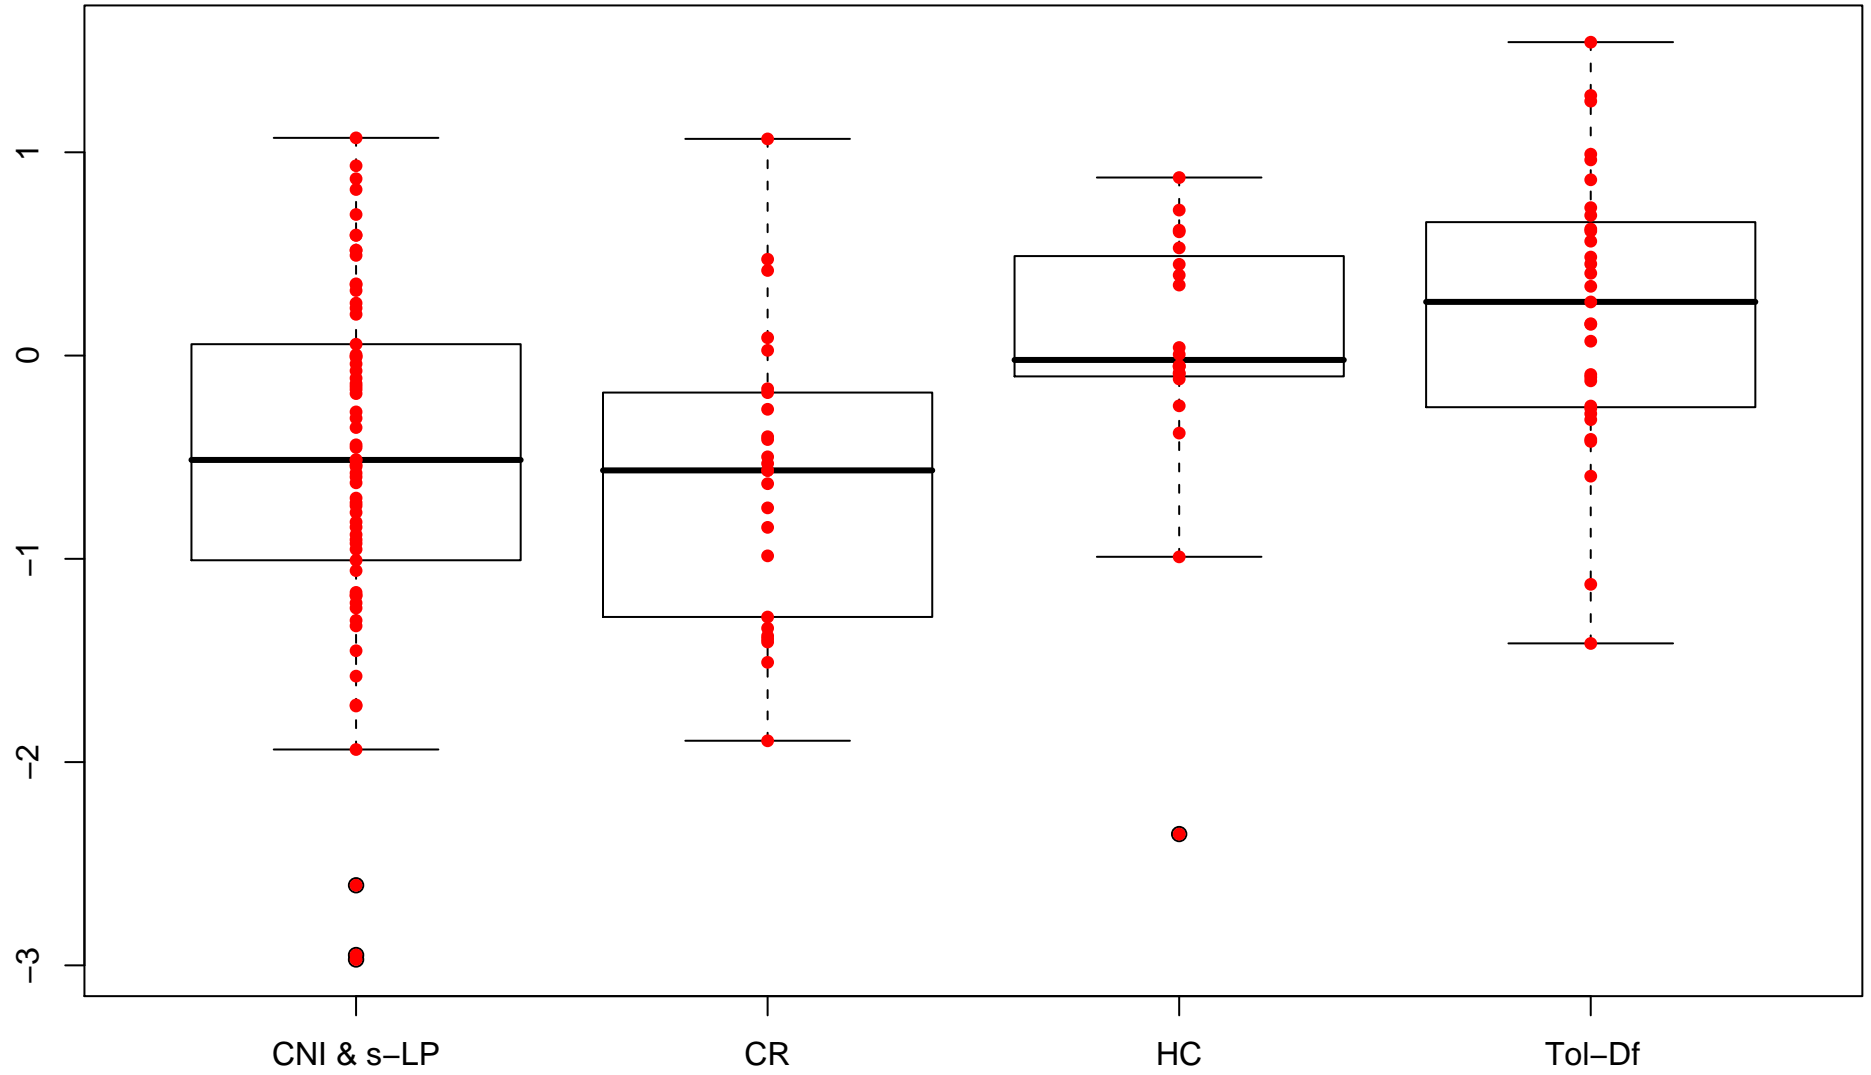

Rank 236 : TKTL1  
1.4321e-05

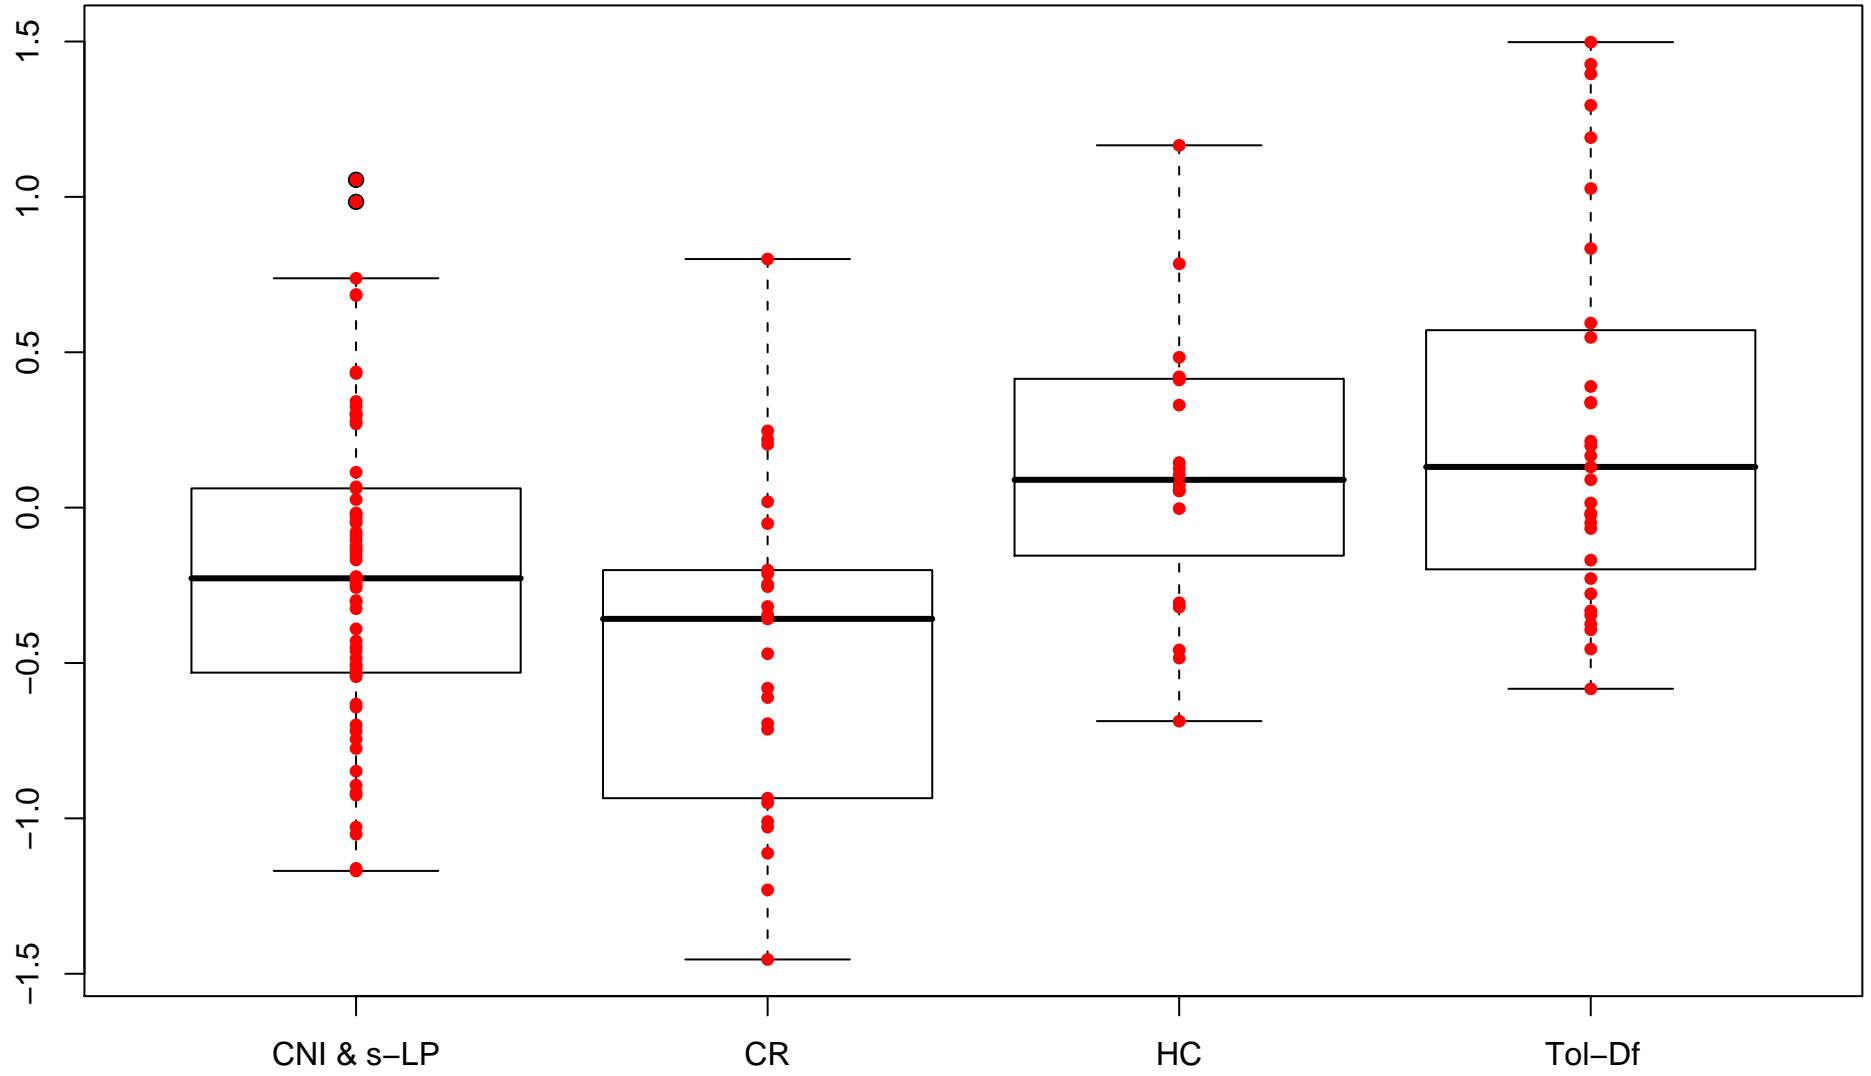

Rank 237 : NR3C2  
1.4358e-05

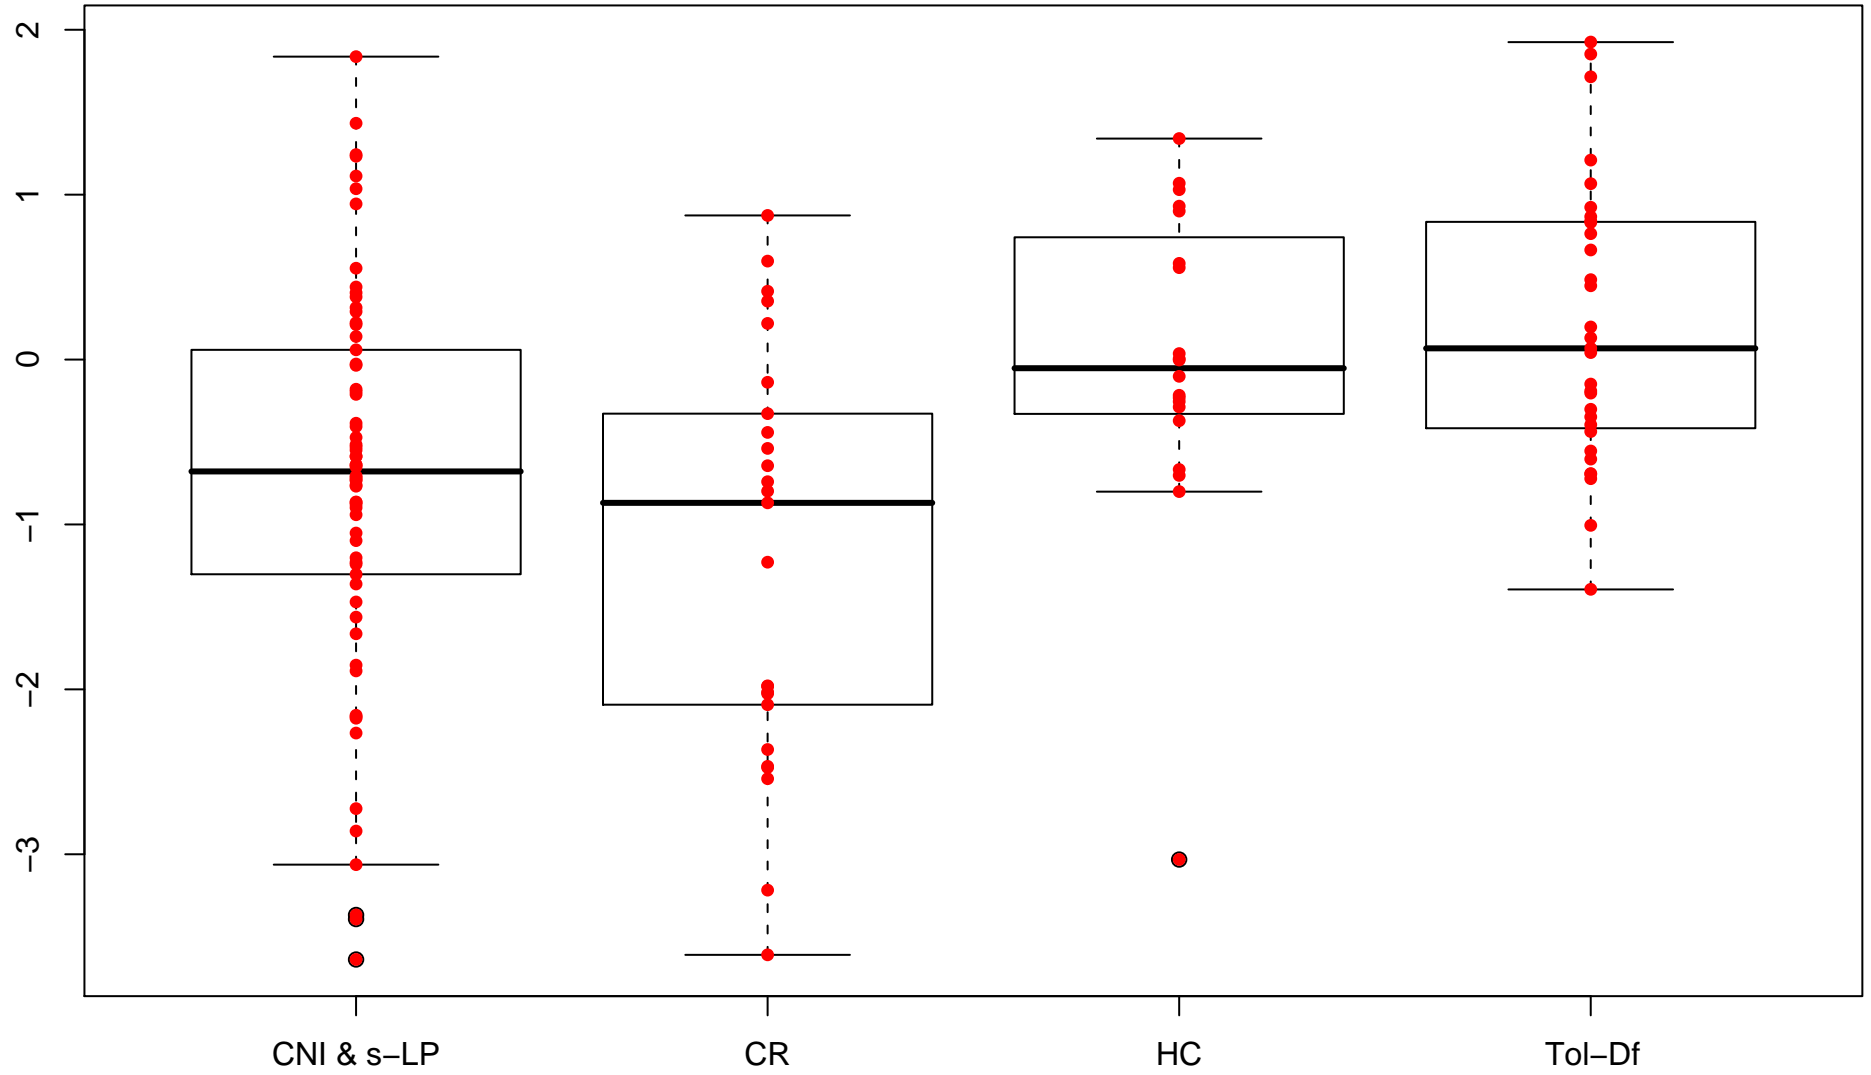

Rank 238 : MAOB  
1.4618e-05

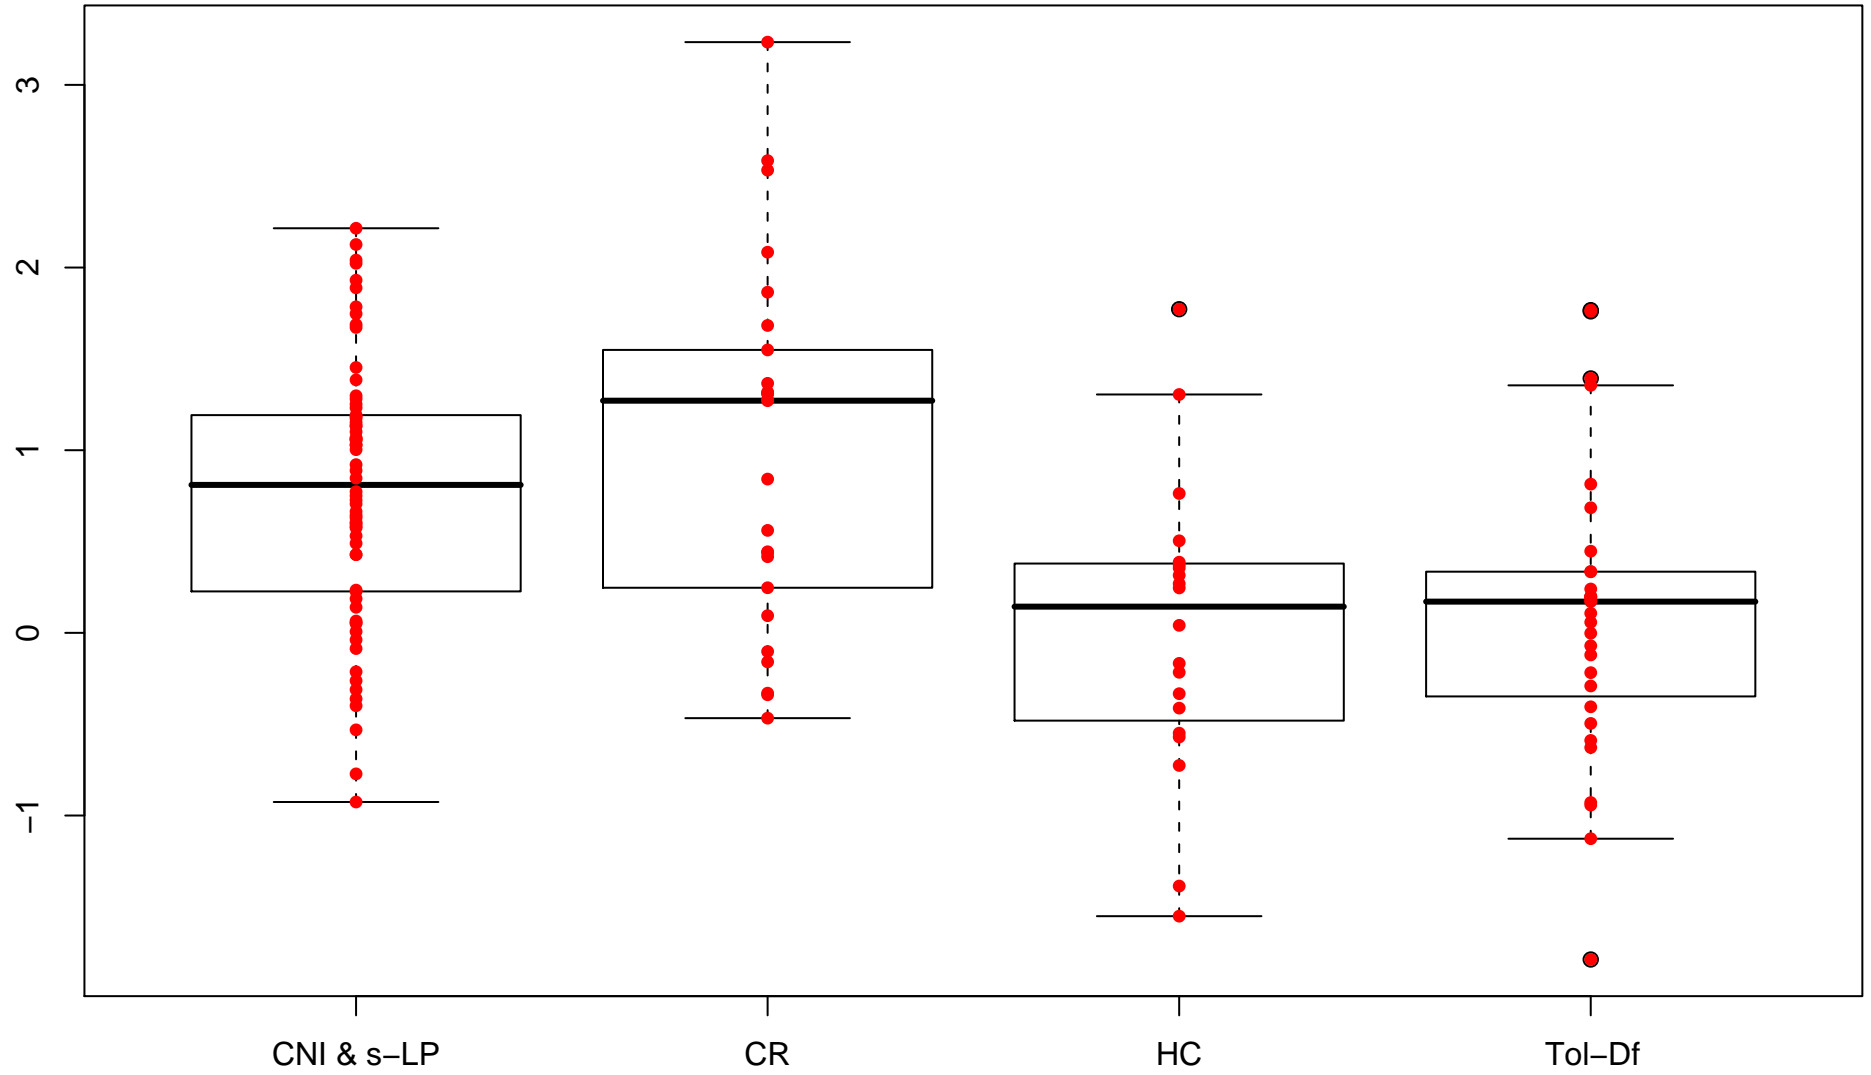

Rank 239 : IL28RA  
1.4916e-05

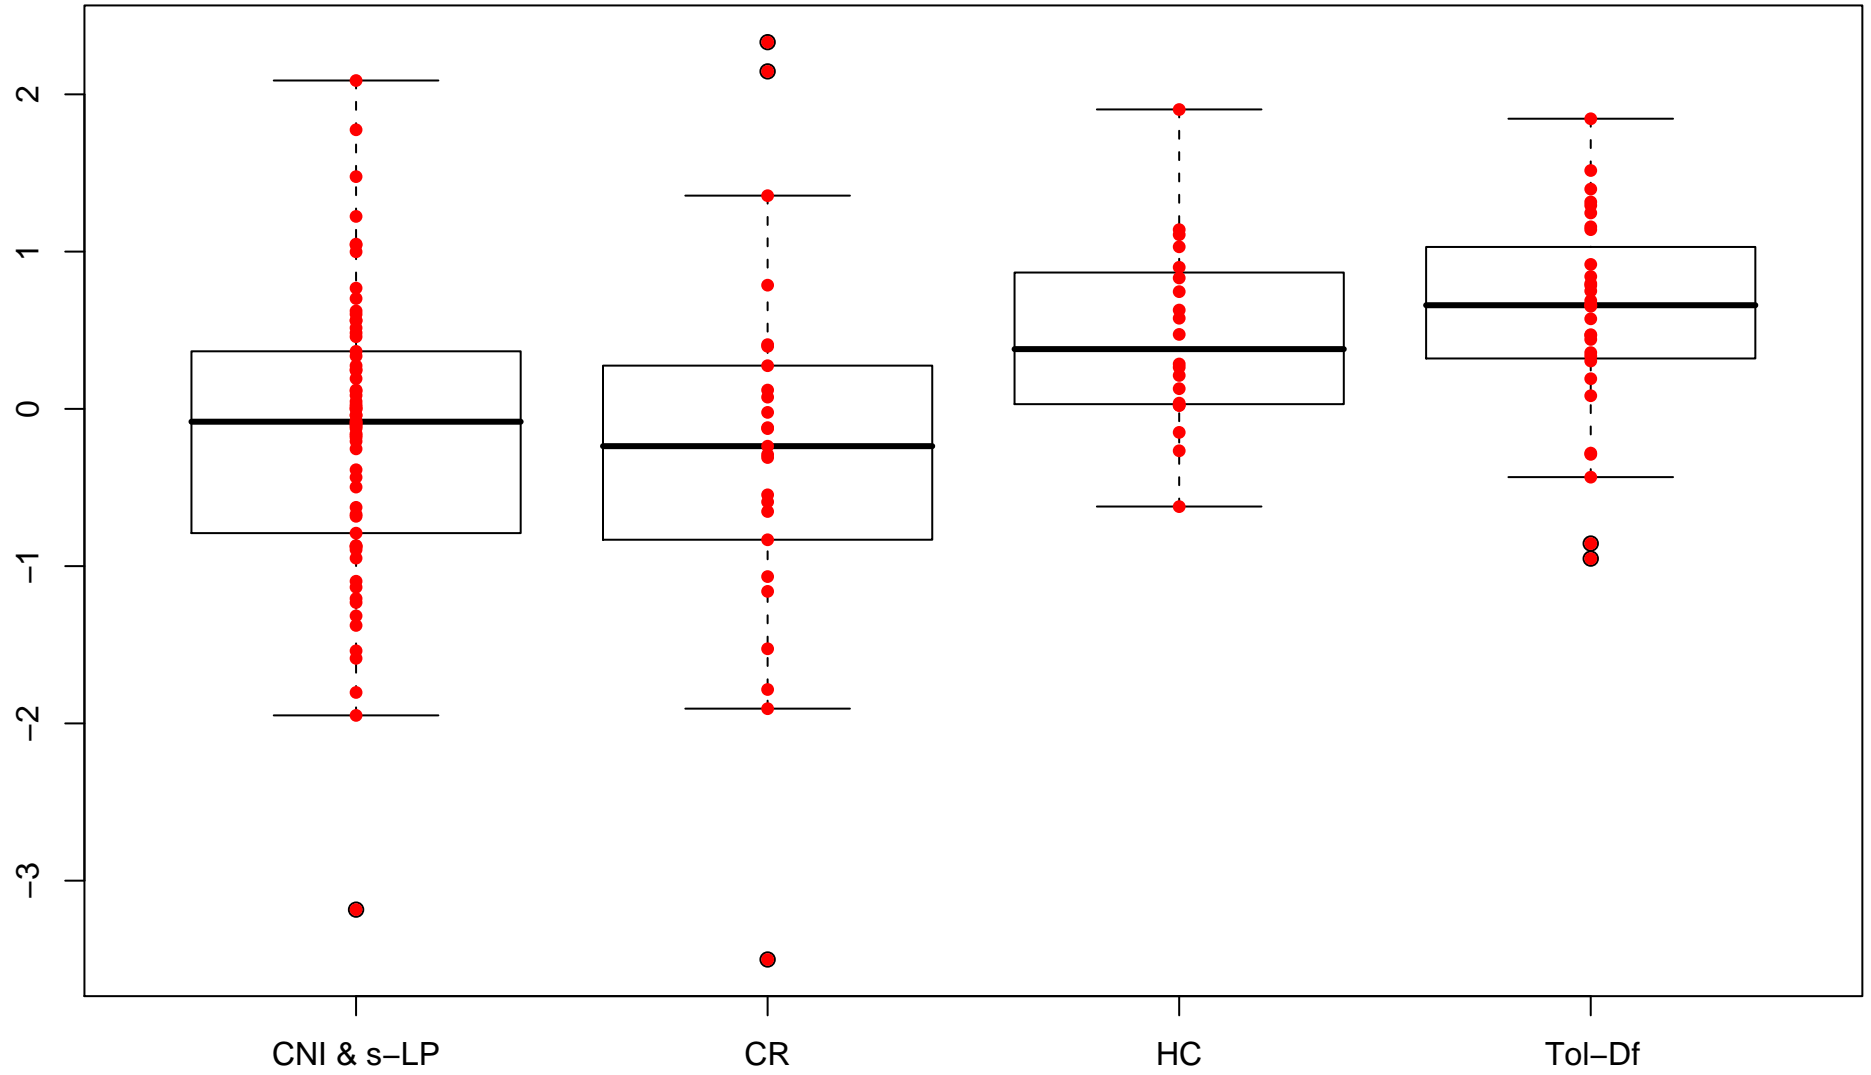



Rank 240 : DNMT1  
1.5013e-05

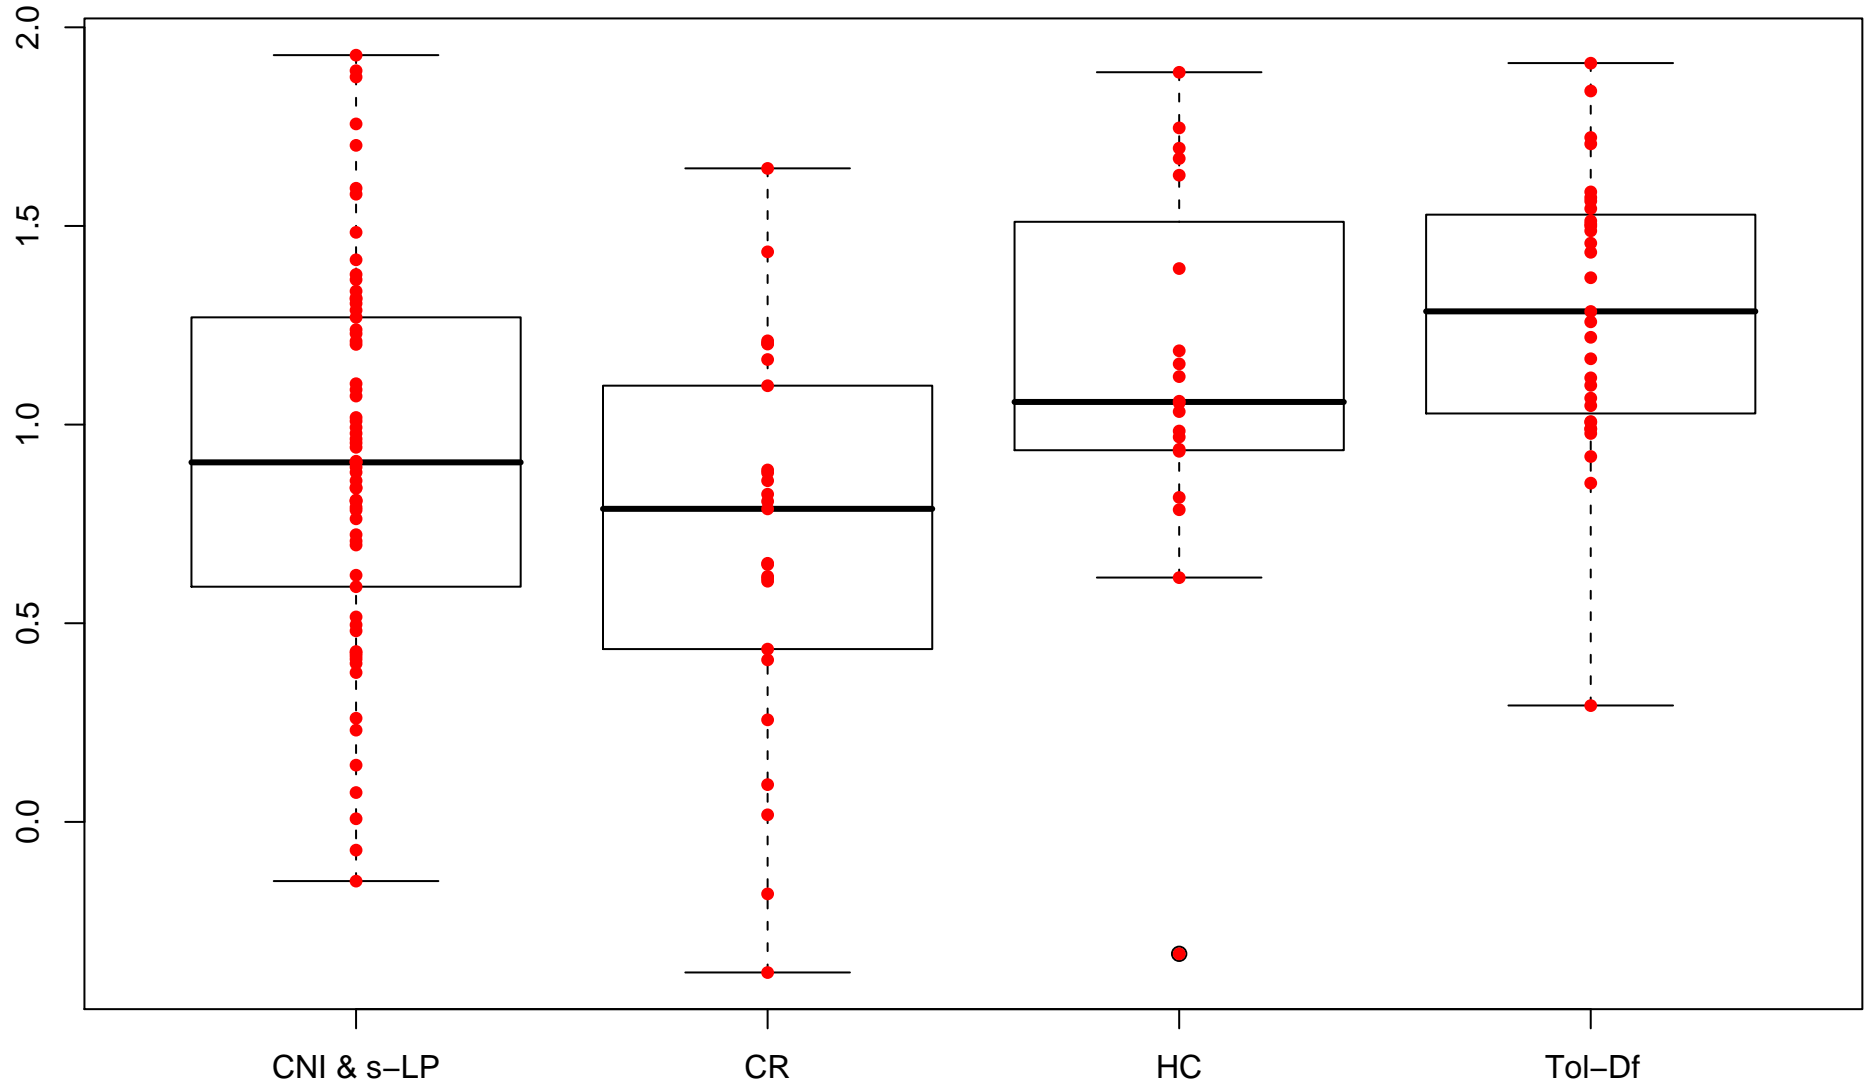

Rank 241 : FCAR  
1.5455e-05

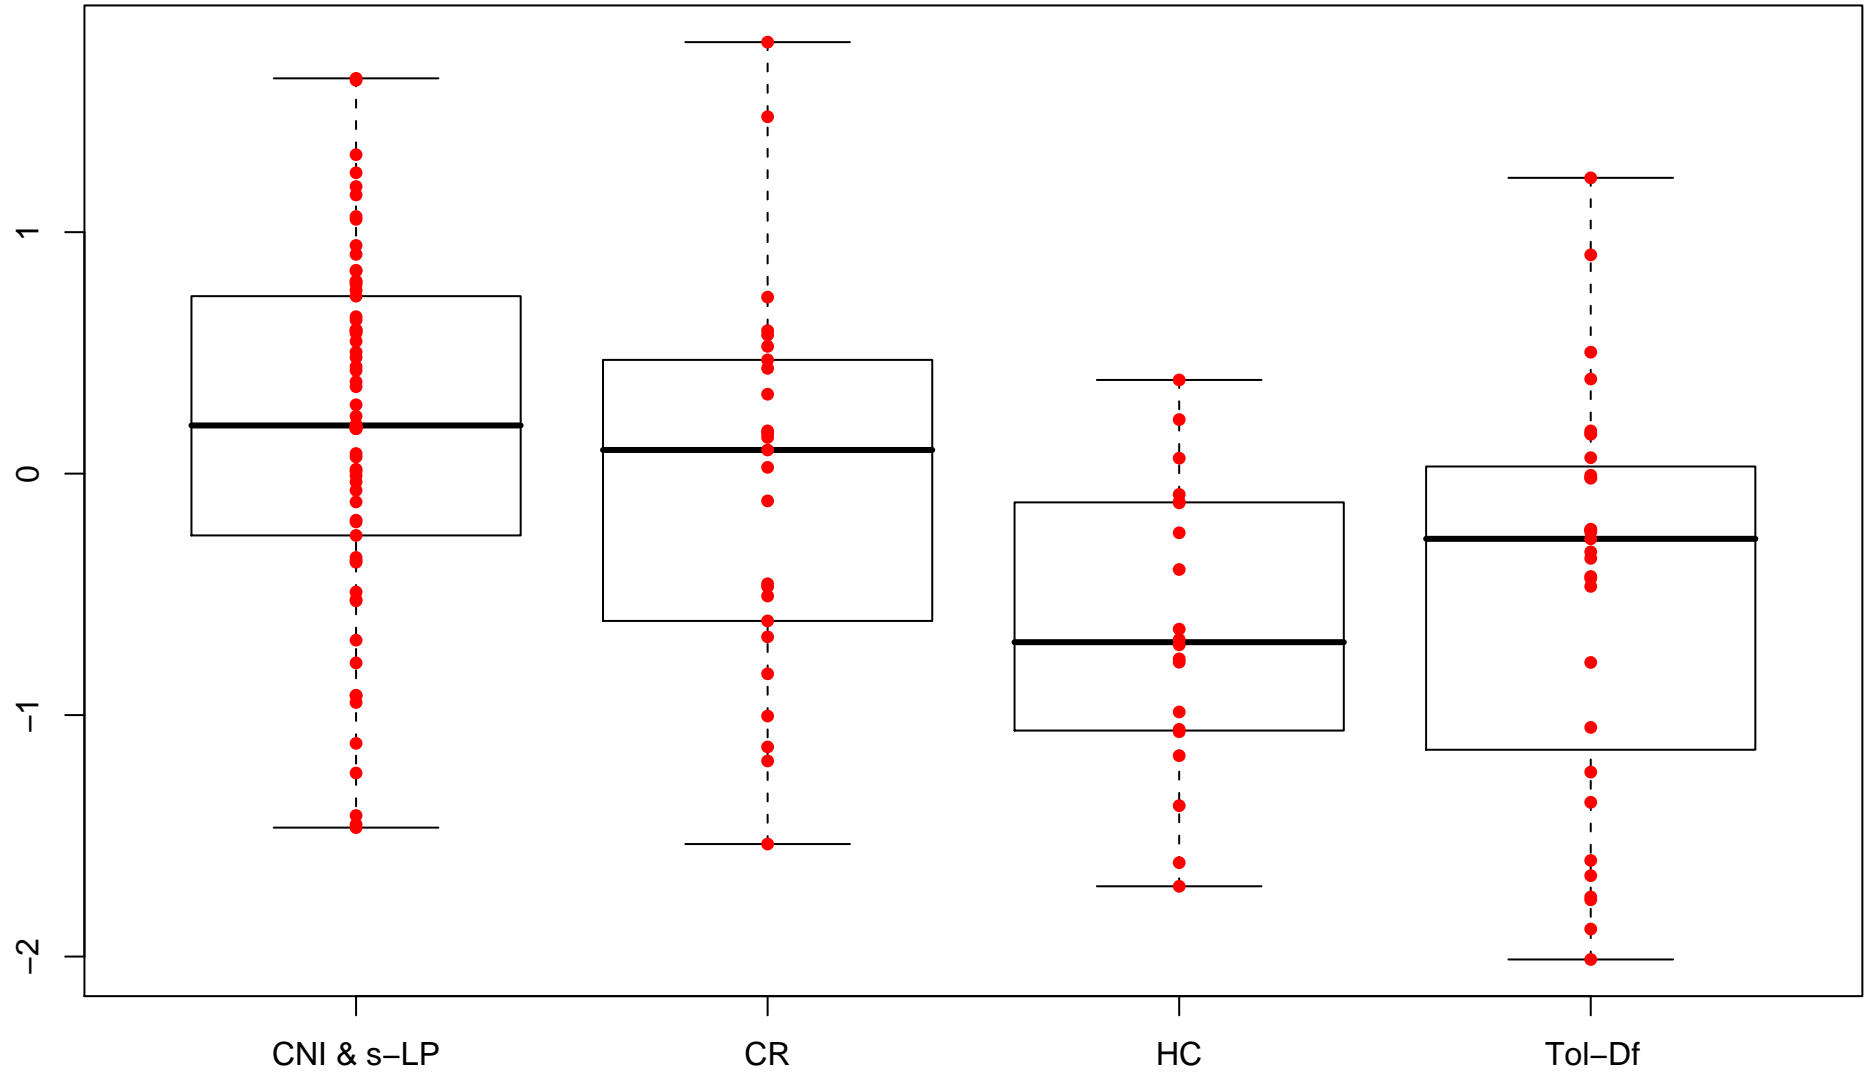

Rank 242 : PLEKHG1  
1.5624e-05

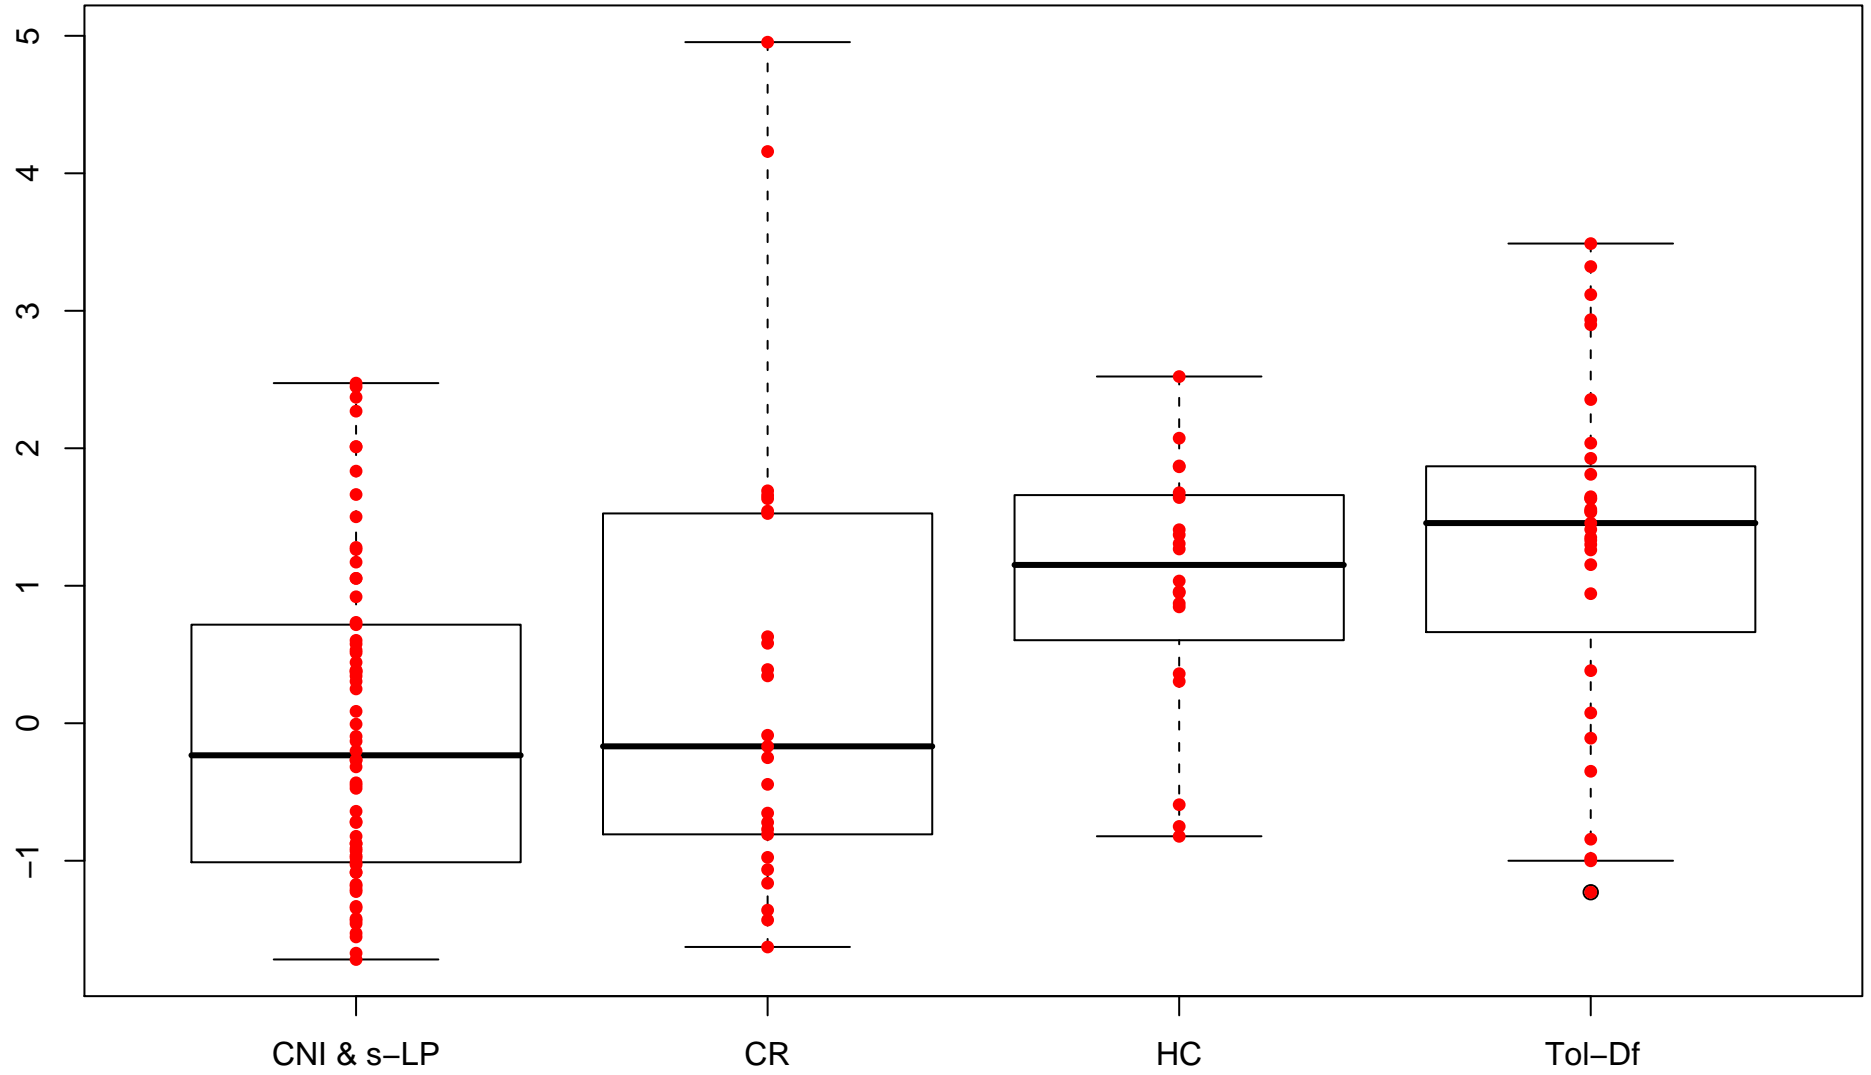

Rank 243 : A\_24\_P910255  
1.616e-05

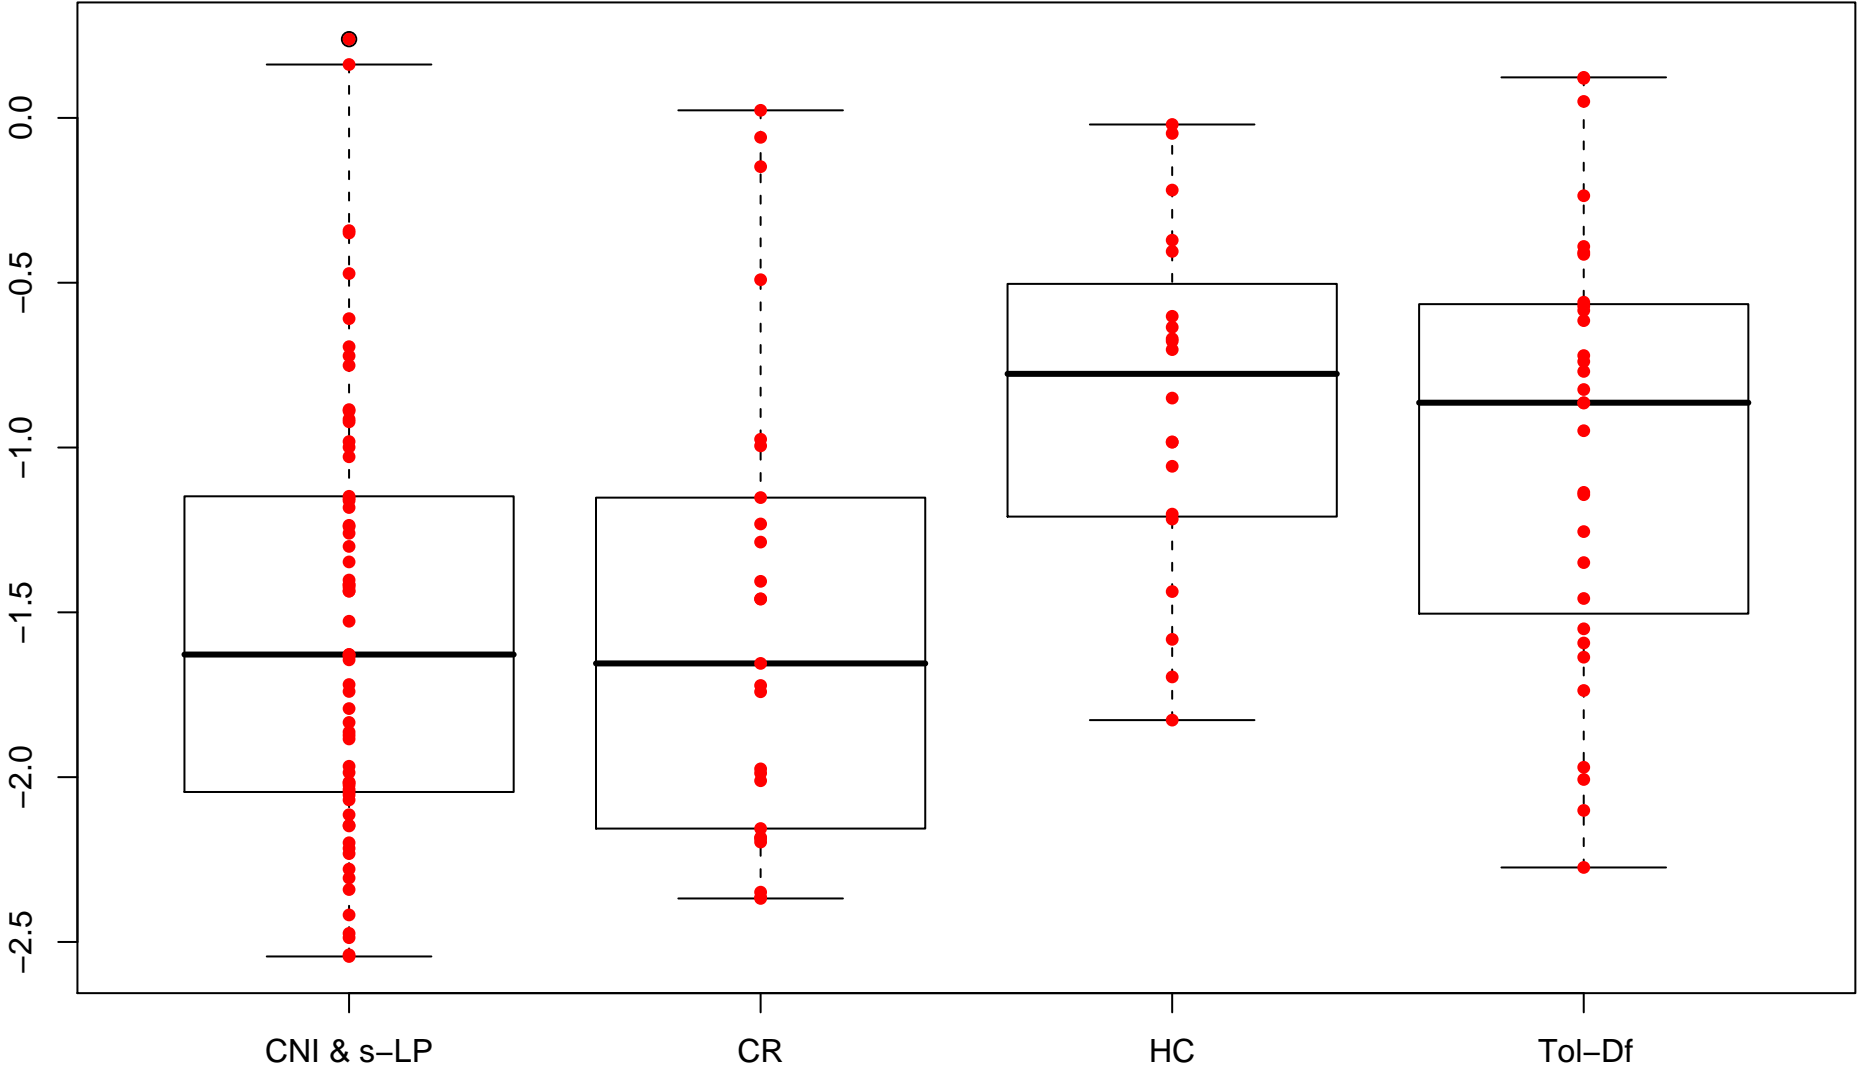

Rank 244 : ZAK  
1.6665e-05

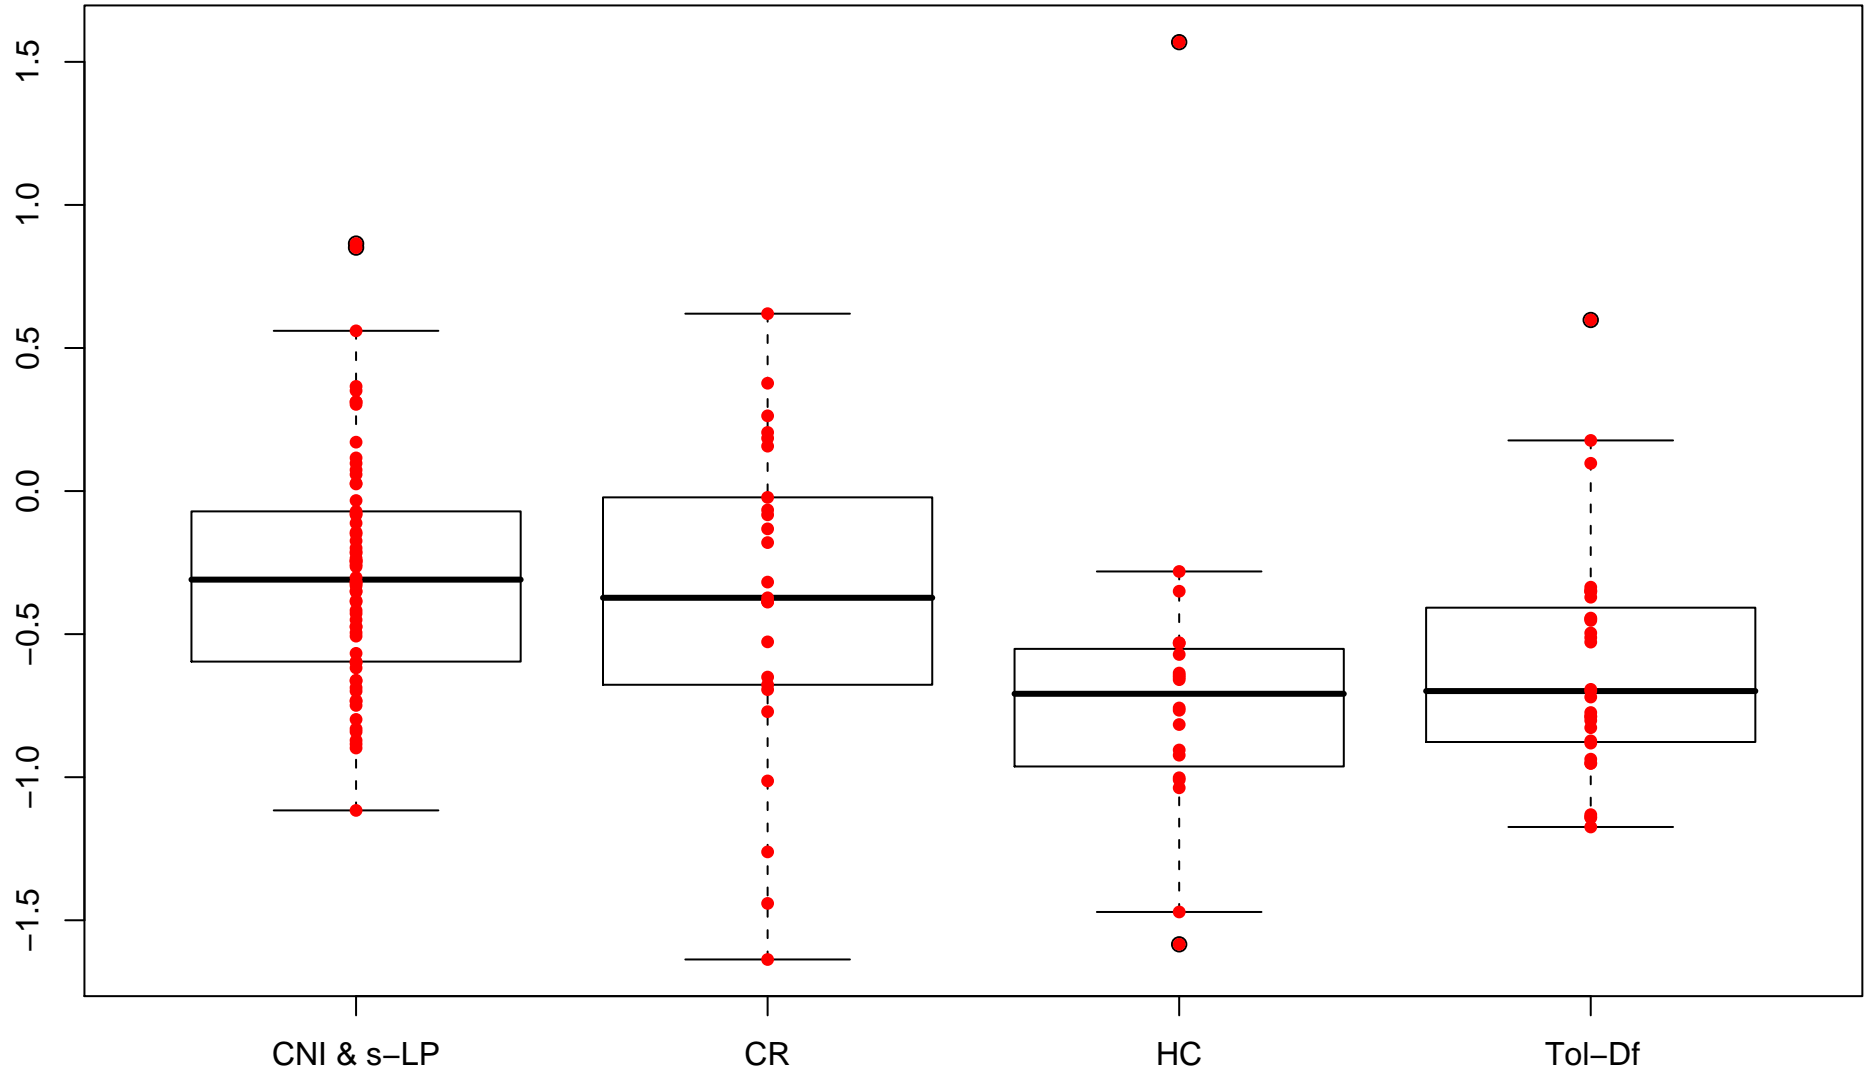

Rank 245 : IL4  
1.673e-05

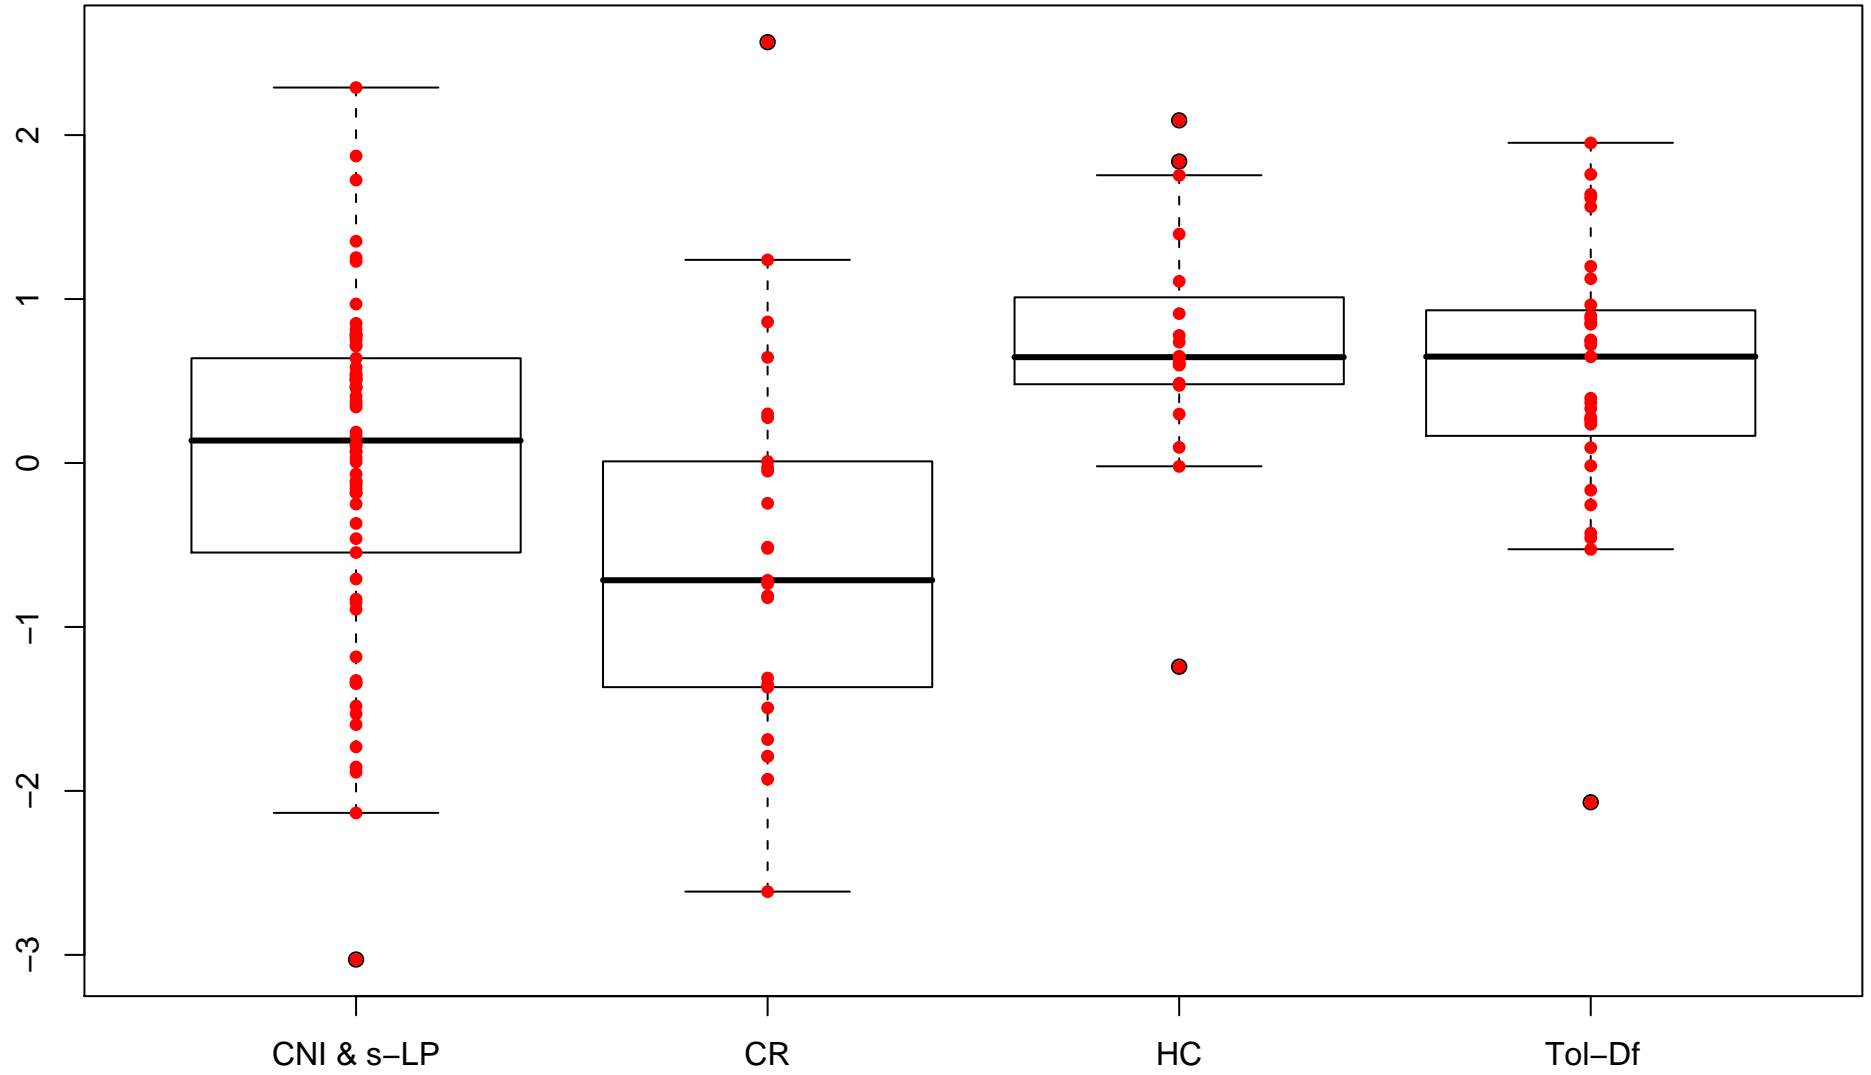

Rank 246 : RTTN  
1.7412e-05

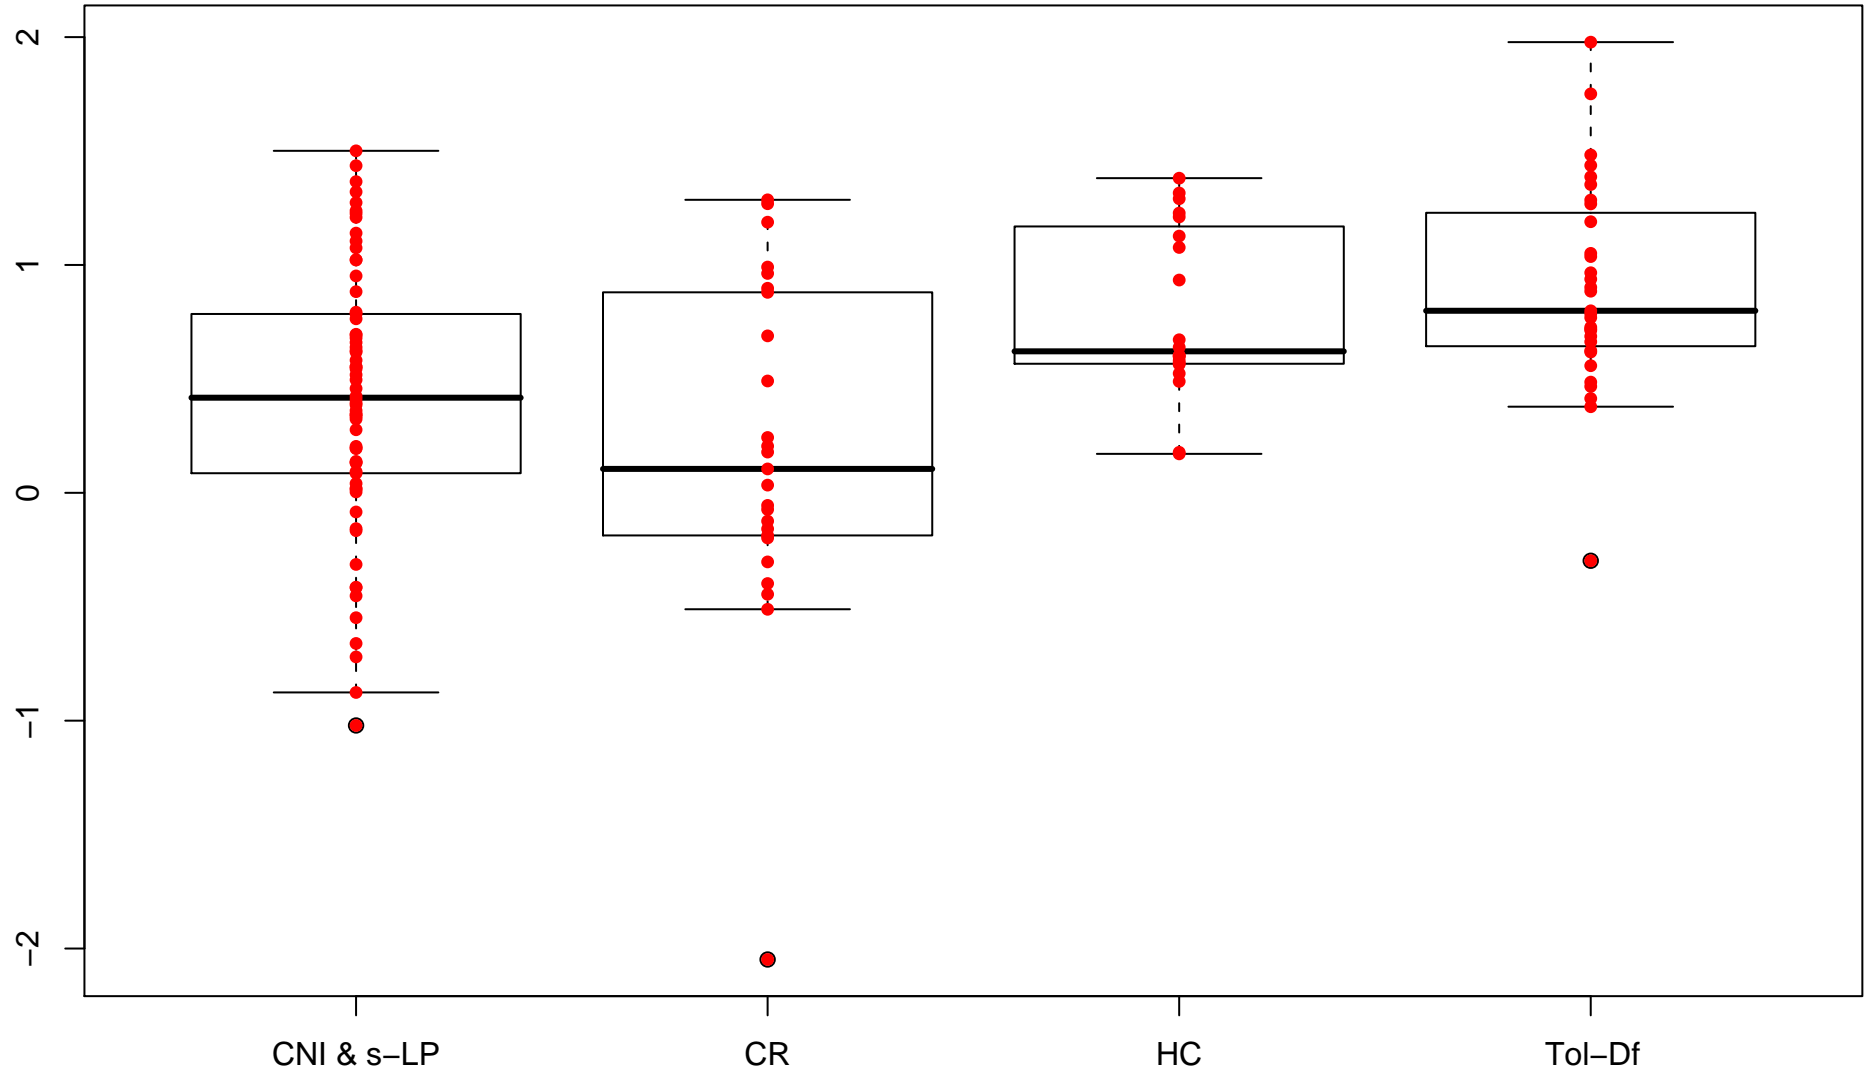

Rank 247 : STMN1  
1.7537e-05

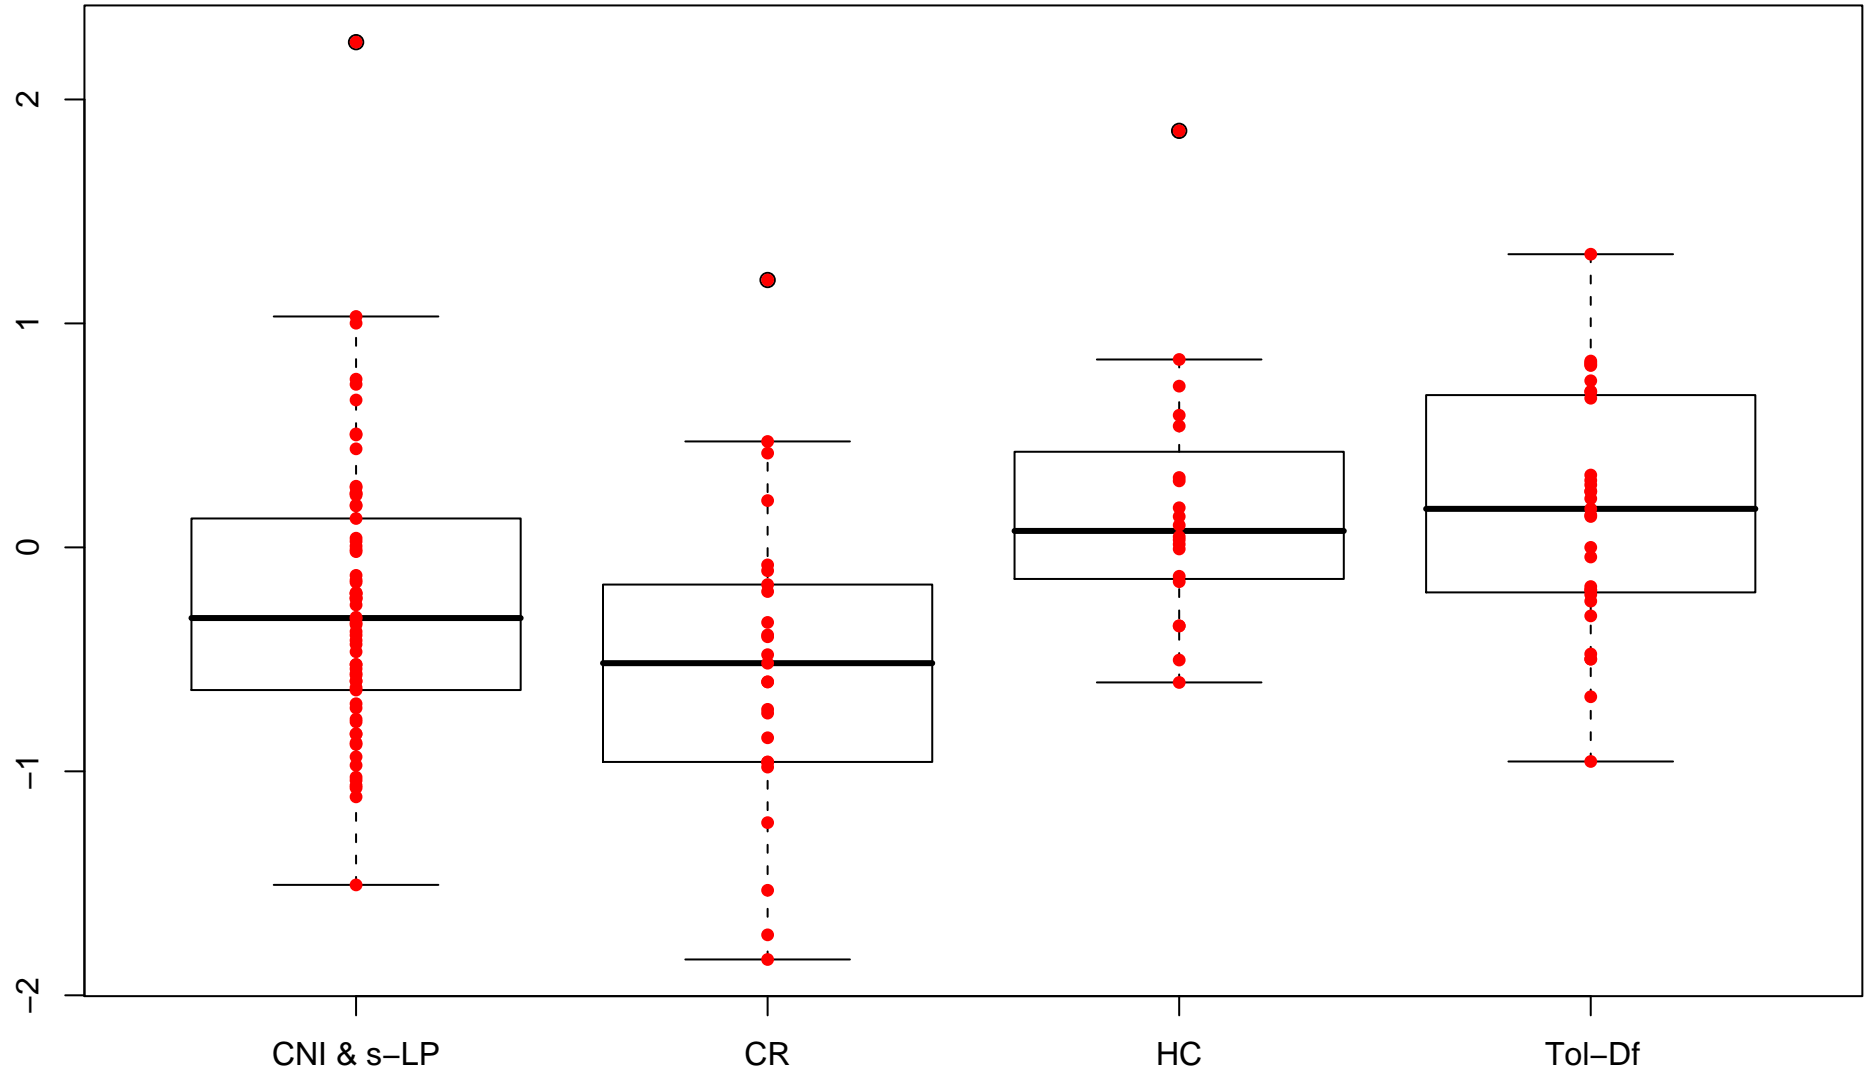



Rank 248 : SEPT9  
1.767e-05

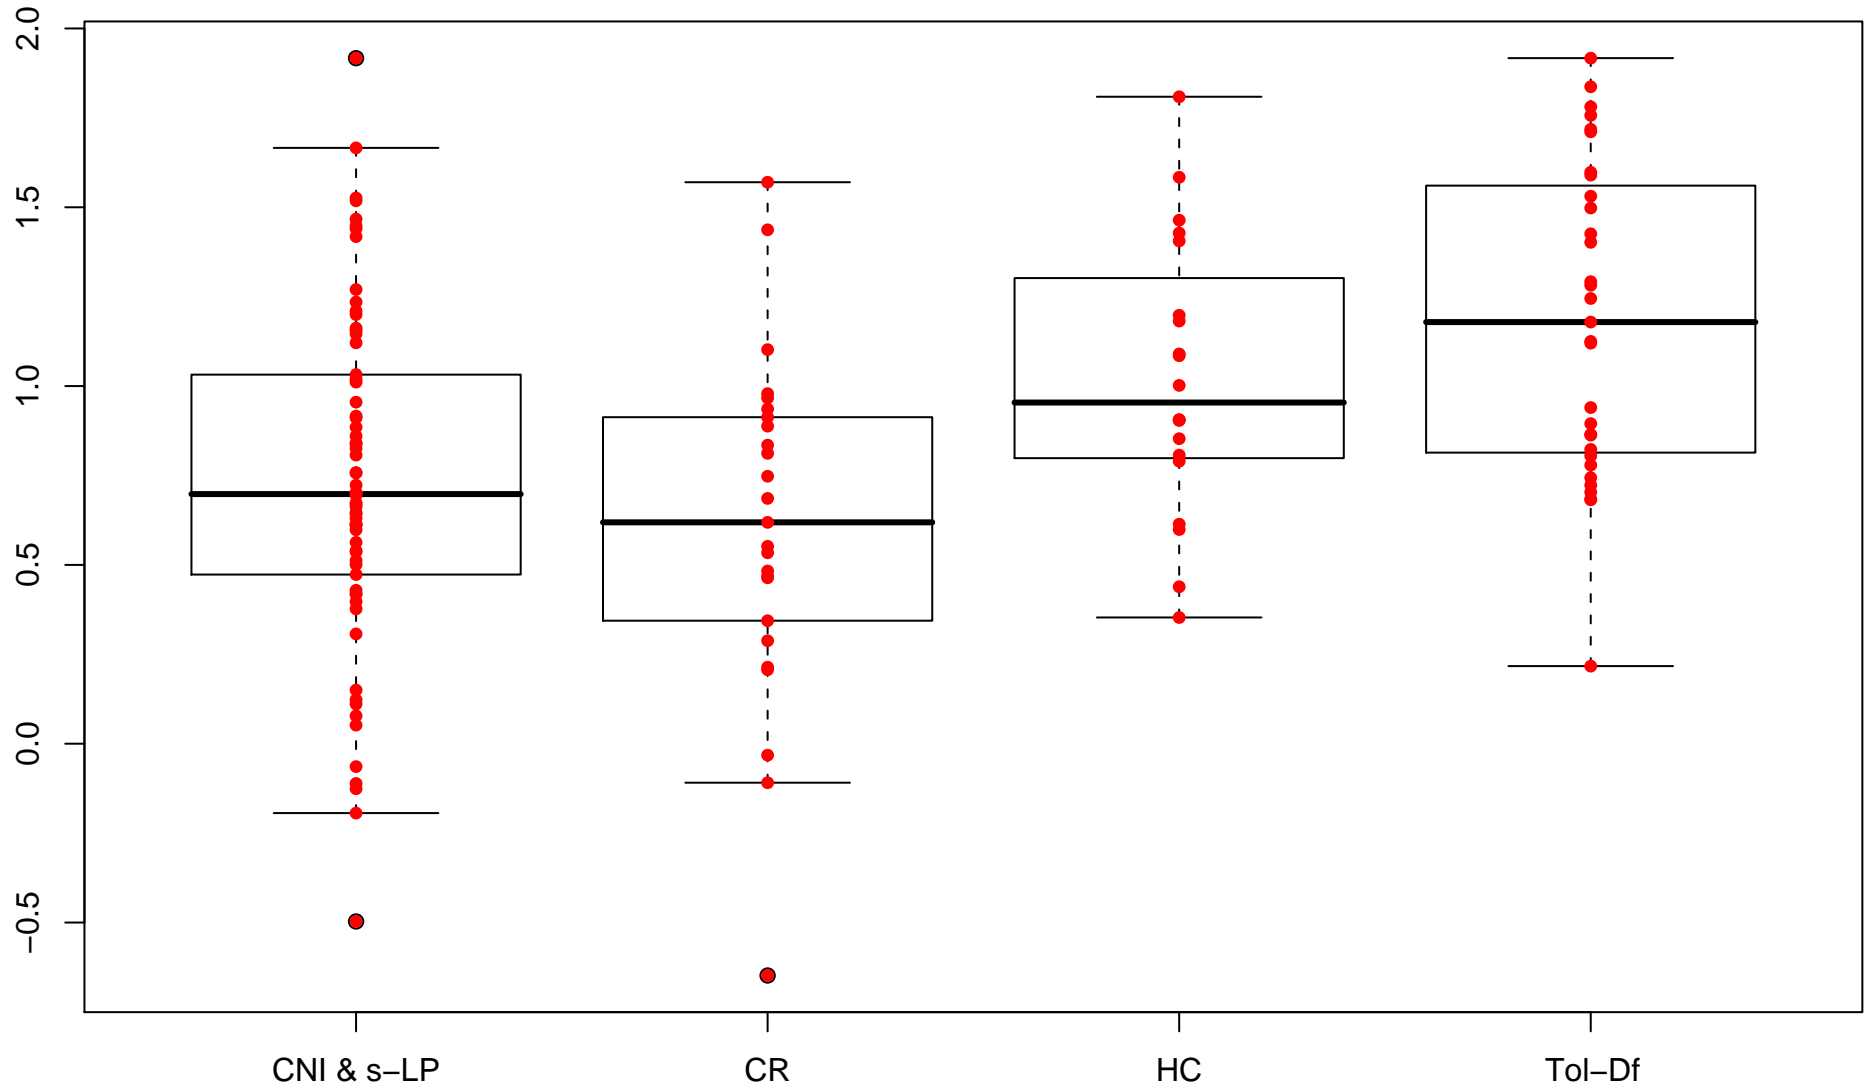

Rank 249 : A\_23\_P393495  
1.7671e-05

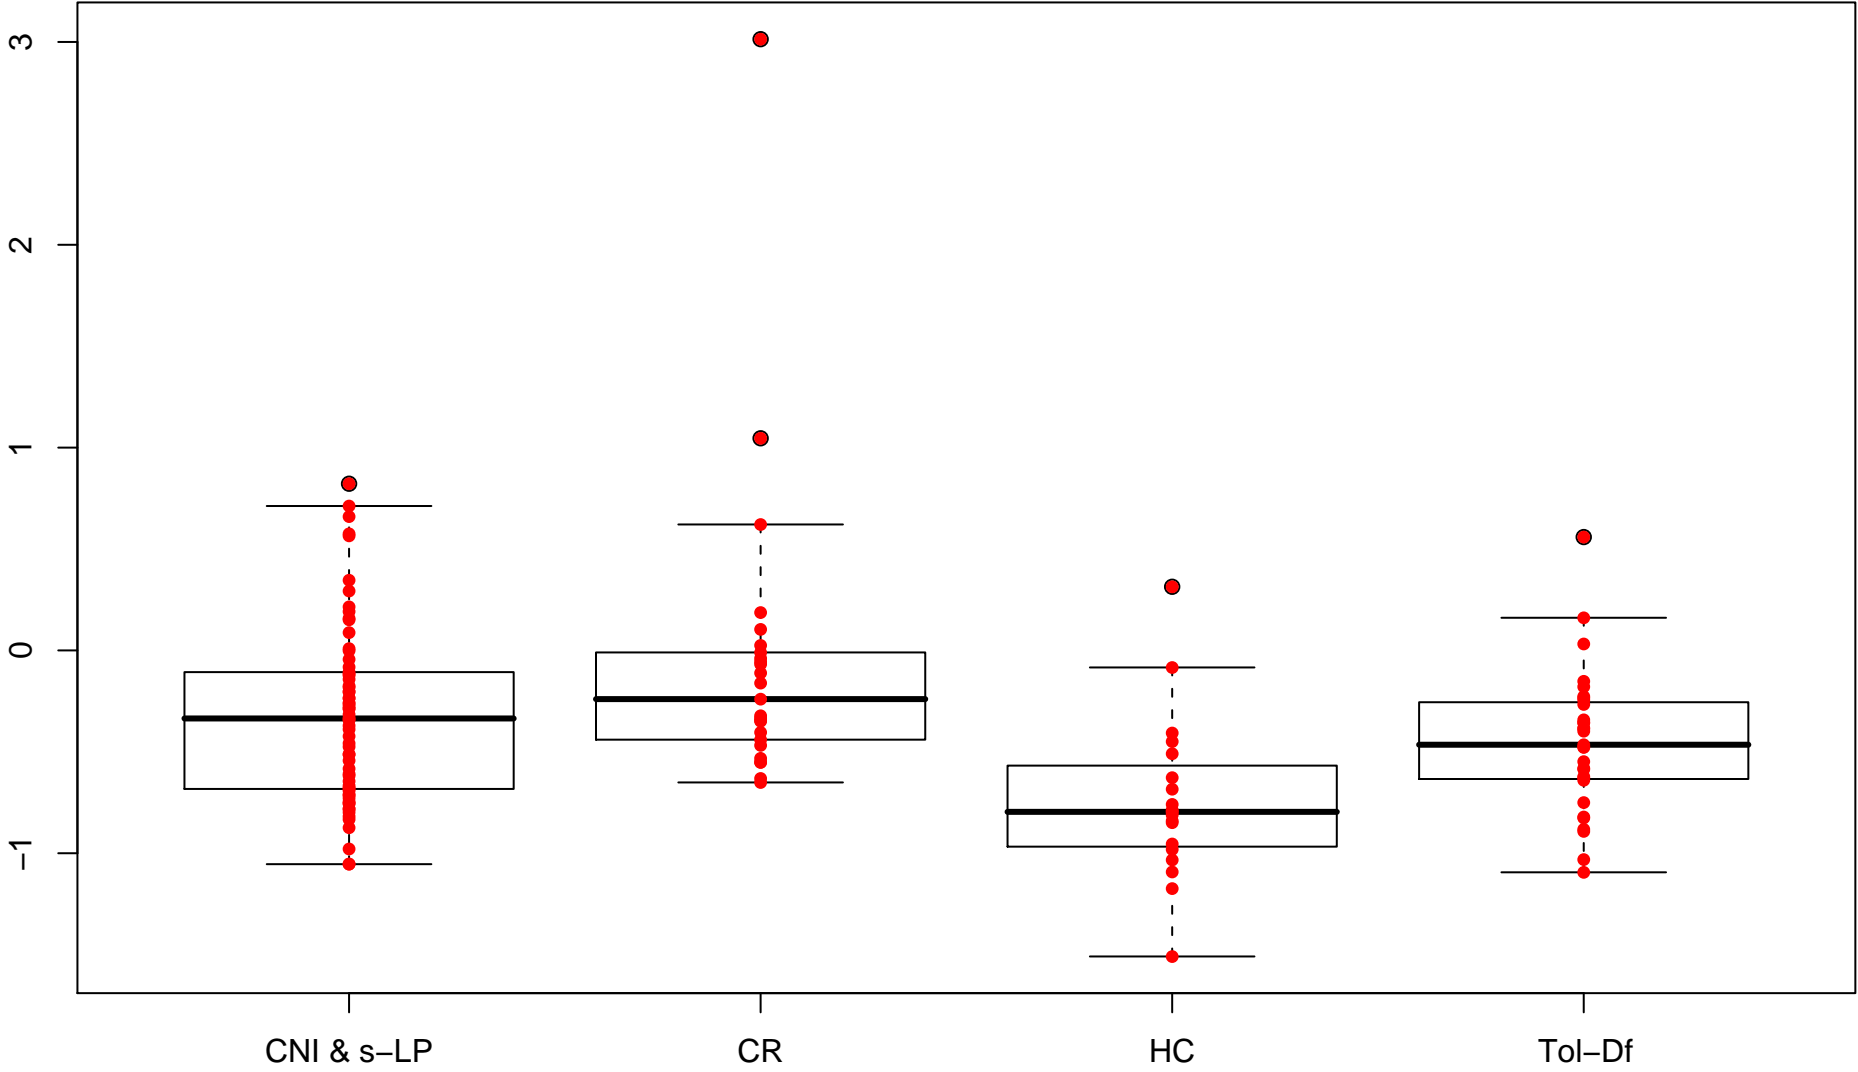

Rank 250 : DYSF  
1.7765e-05

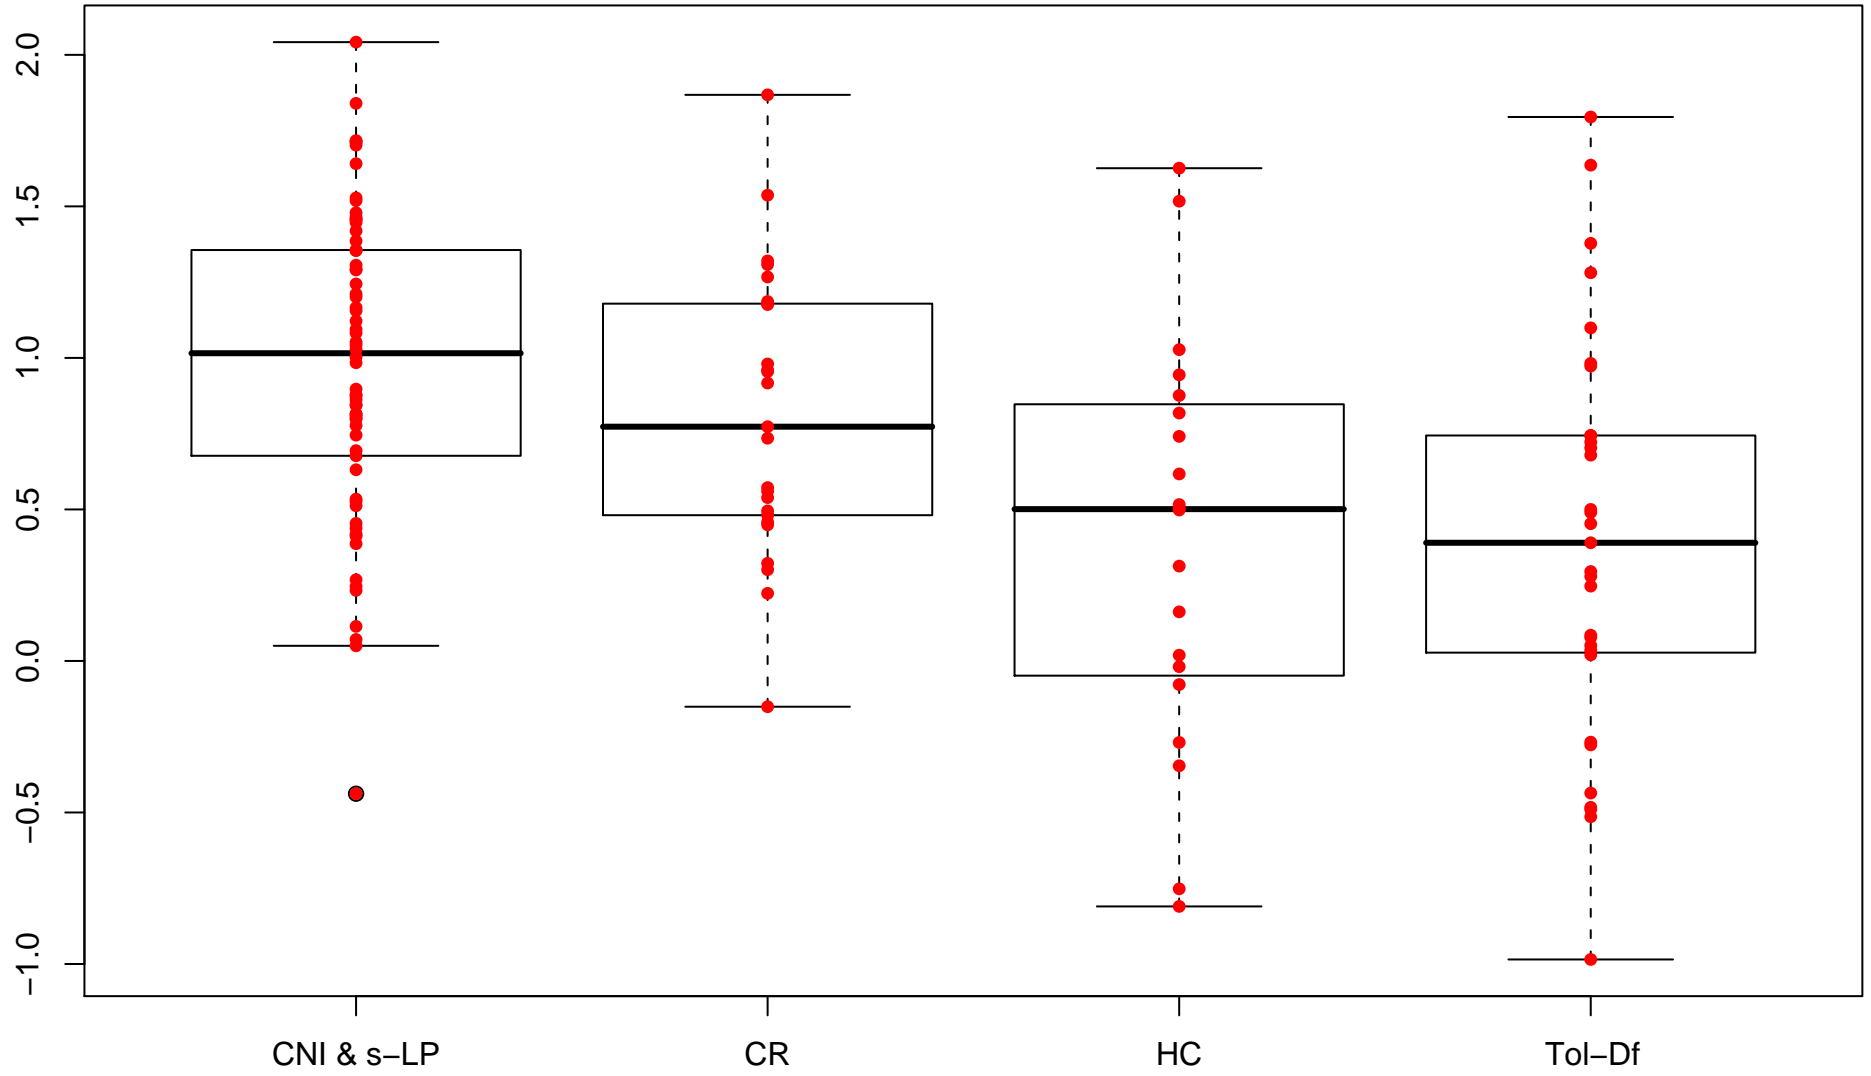

Rank 251 : BCL11A  
1.7804e-05

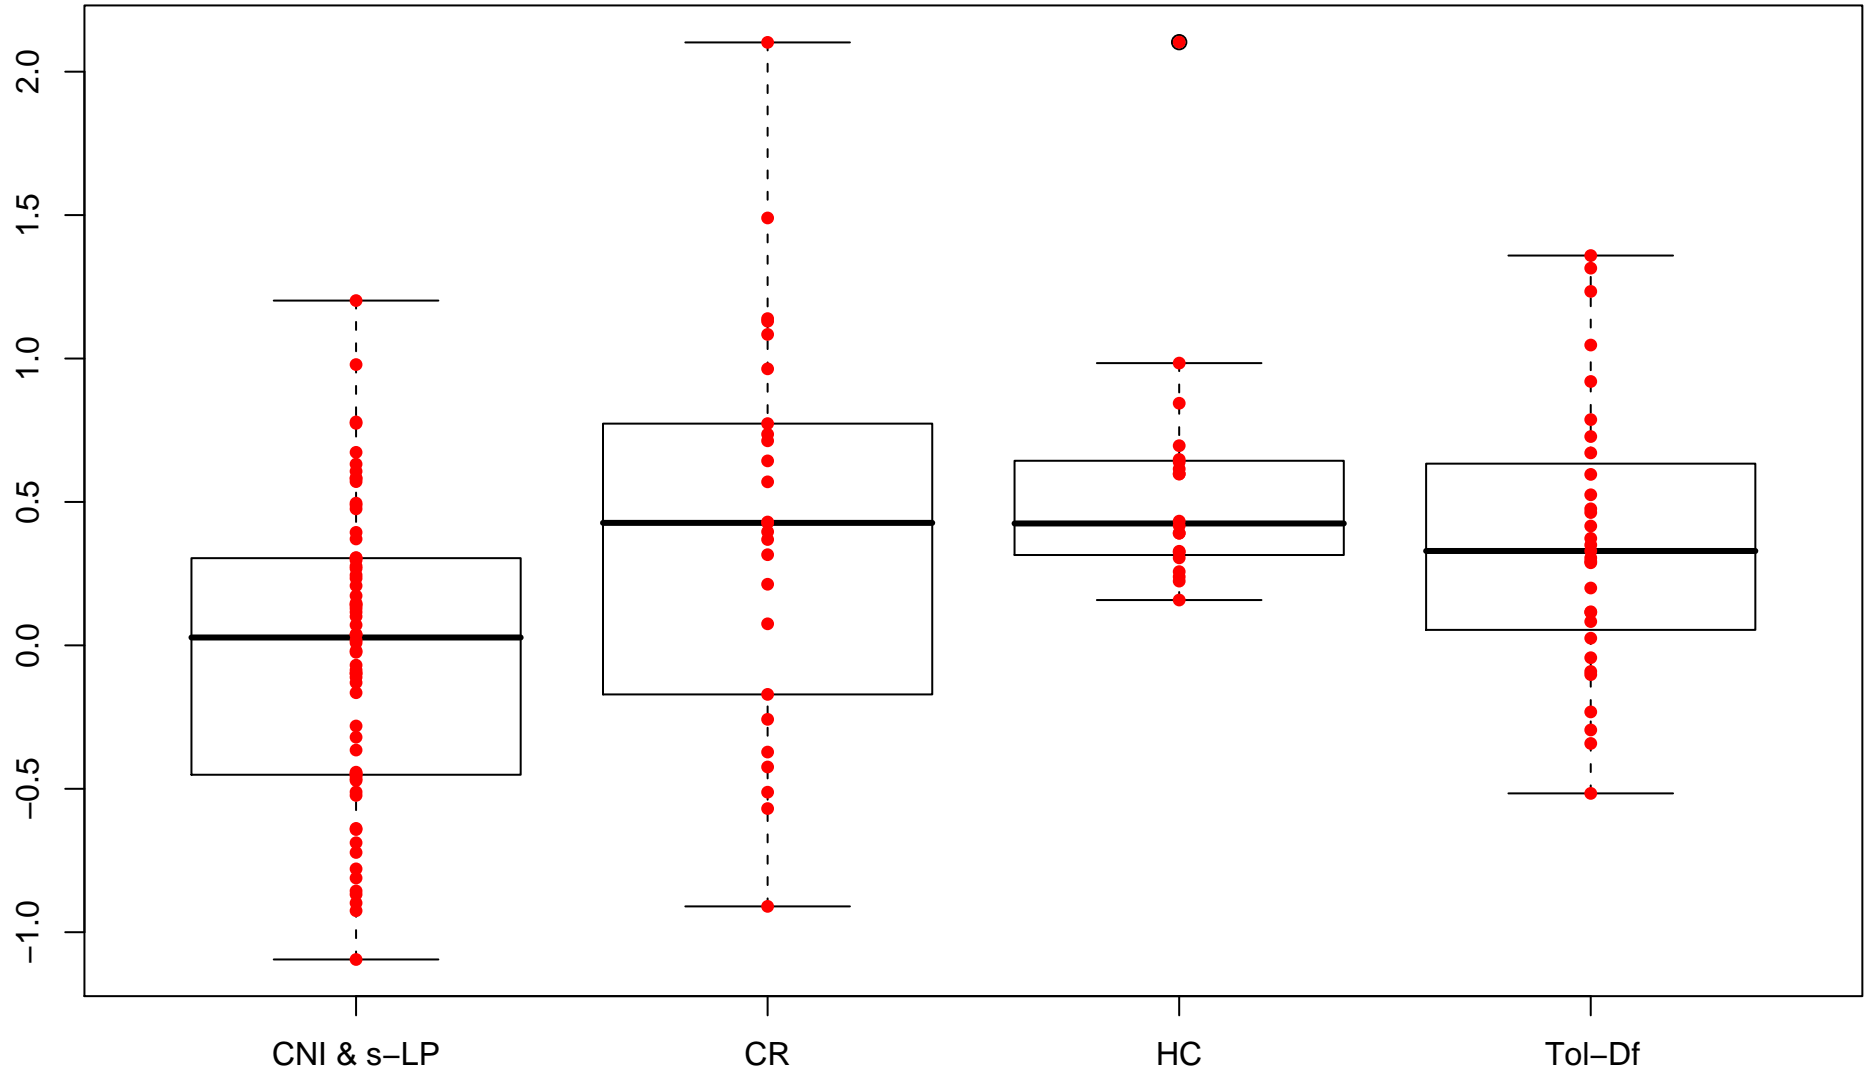

252 : FLJ14186;LOC441124;LOC646434;LOC653056;LOC728417;LOC728728;LOC729021;LOC729028;LOC730953;L  
1.8016e-05

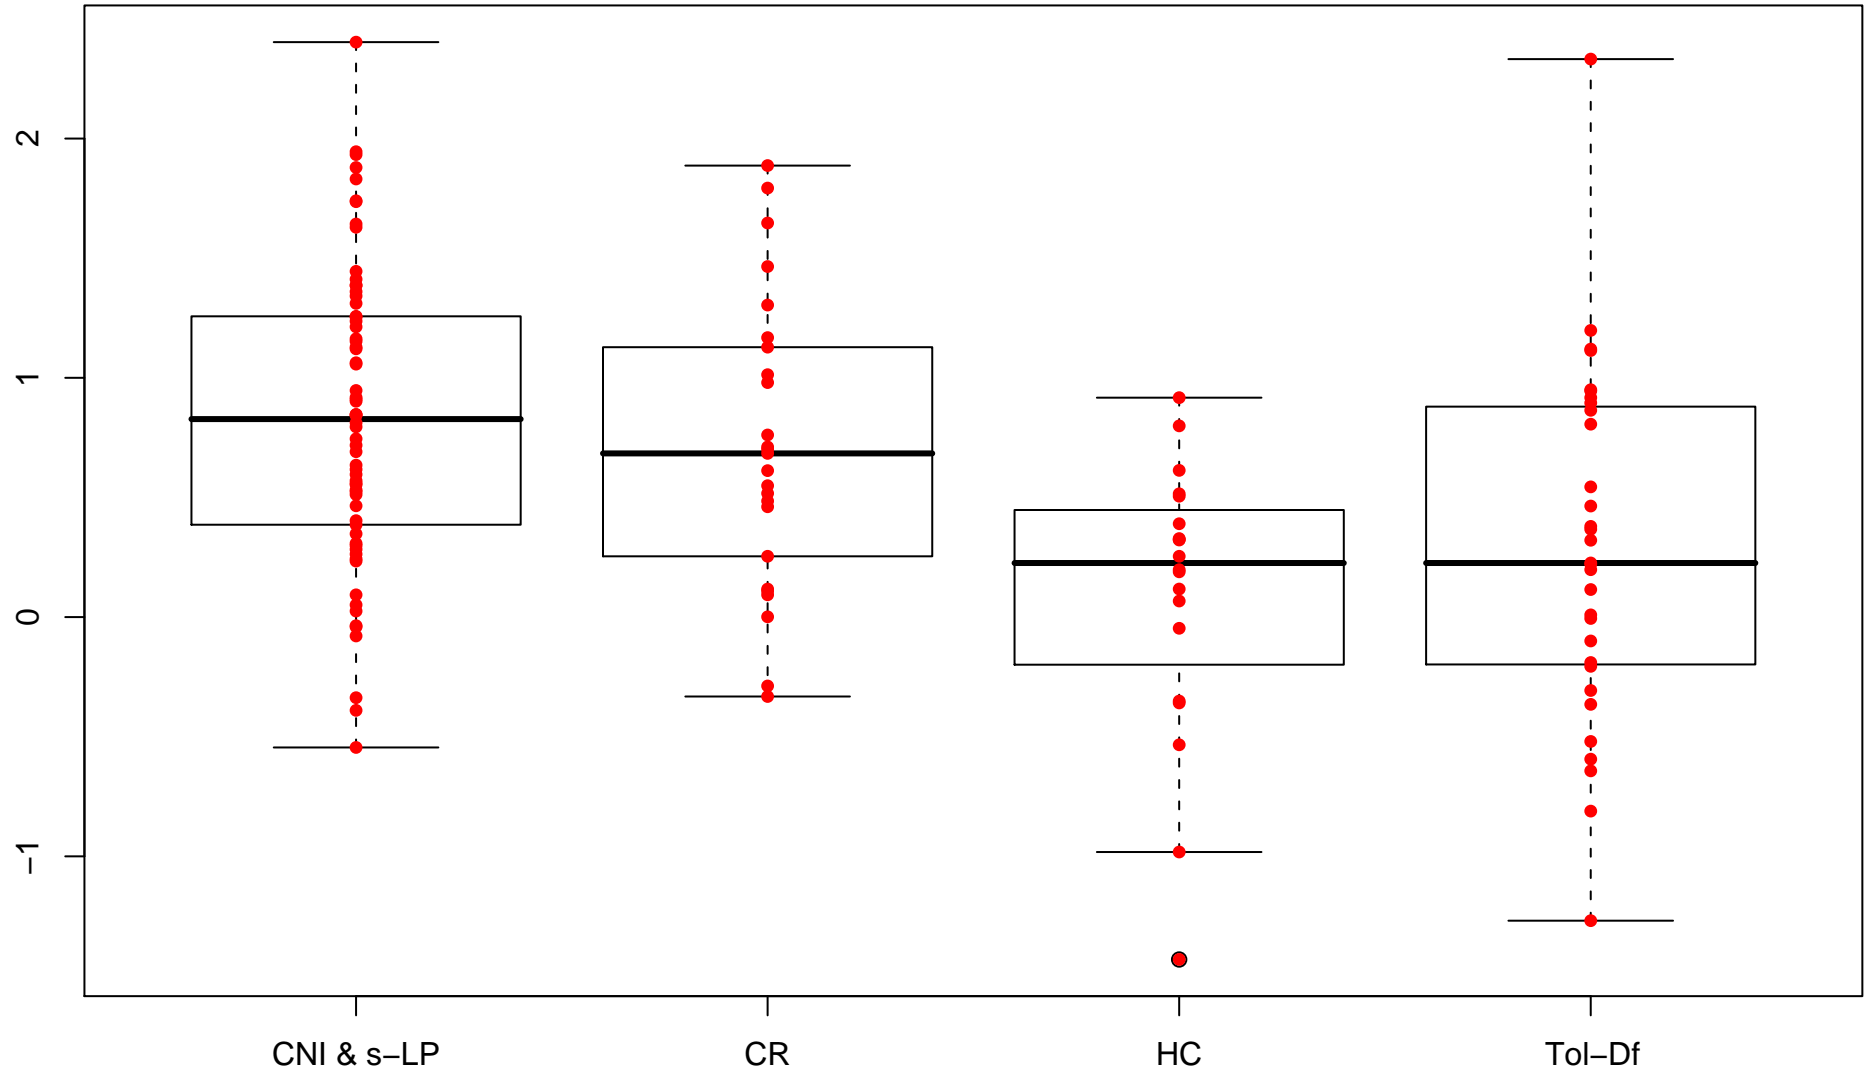

Rank 253 : RASGRP1  
1.8023e-05

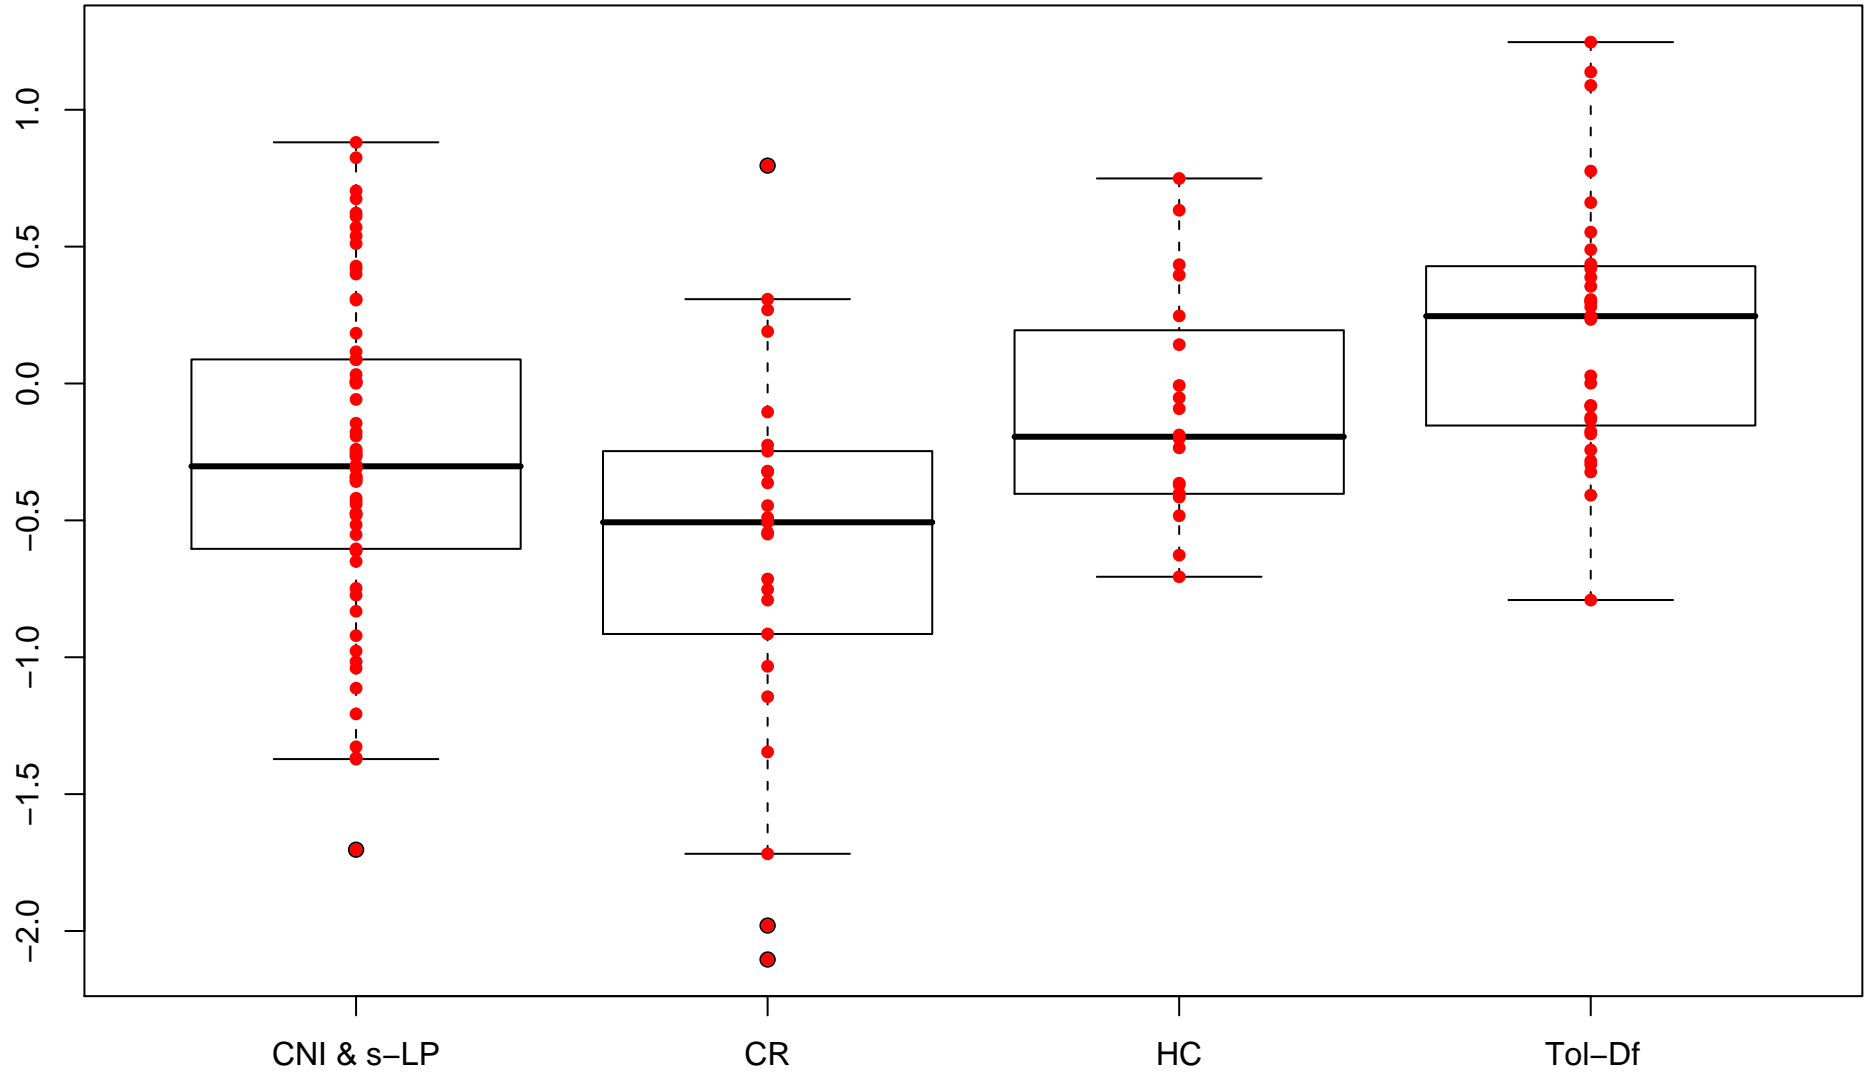

Rank 254 : PPP3CC  
1.8097e-05

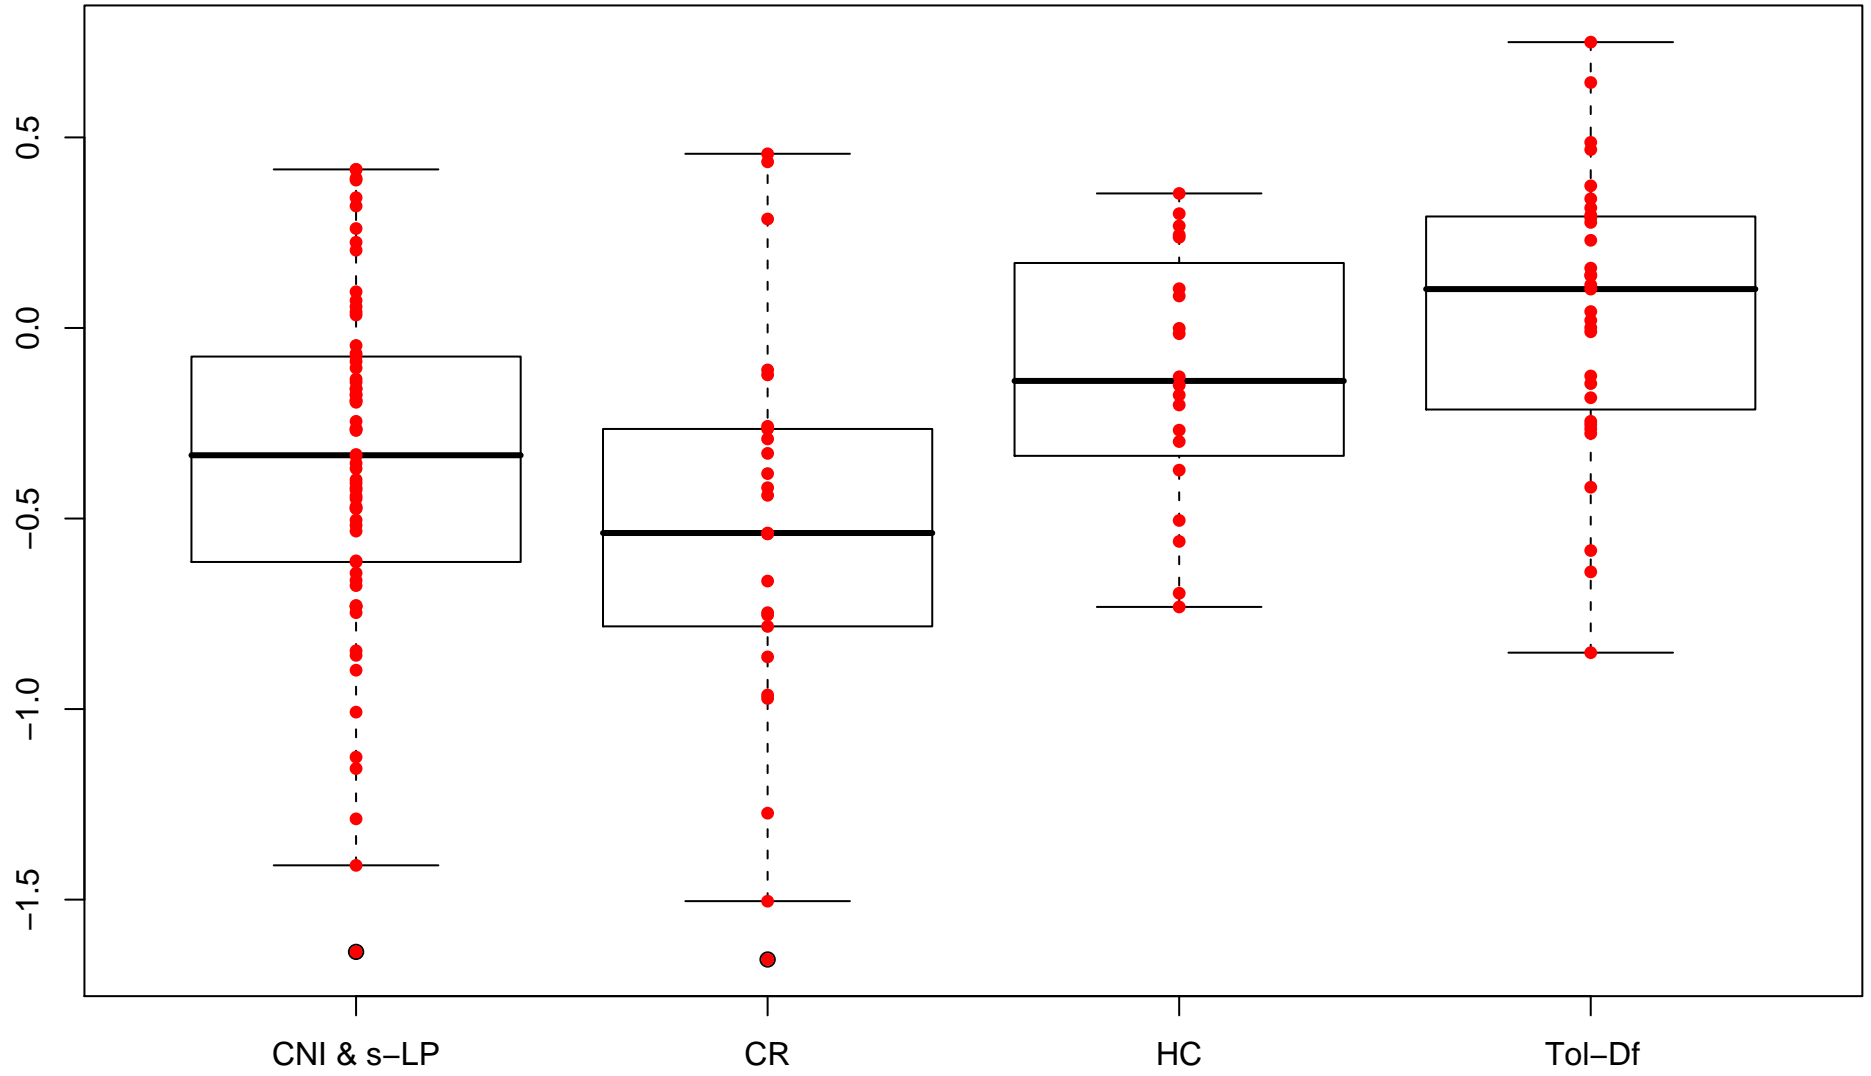

Rank 255 : EIF2C4  
1.8142e-05

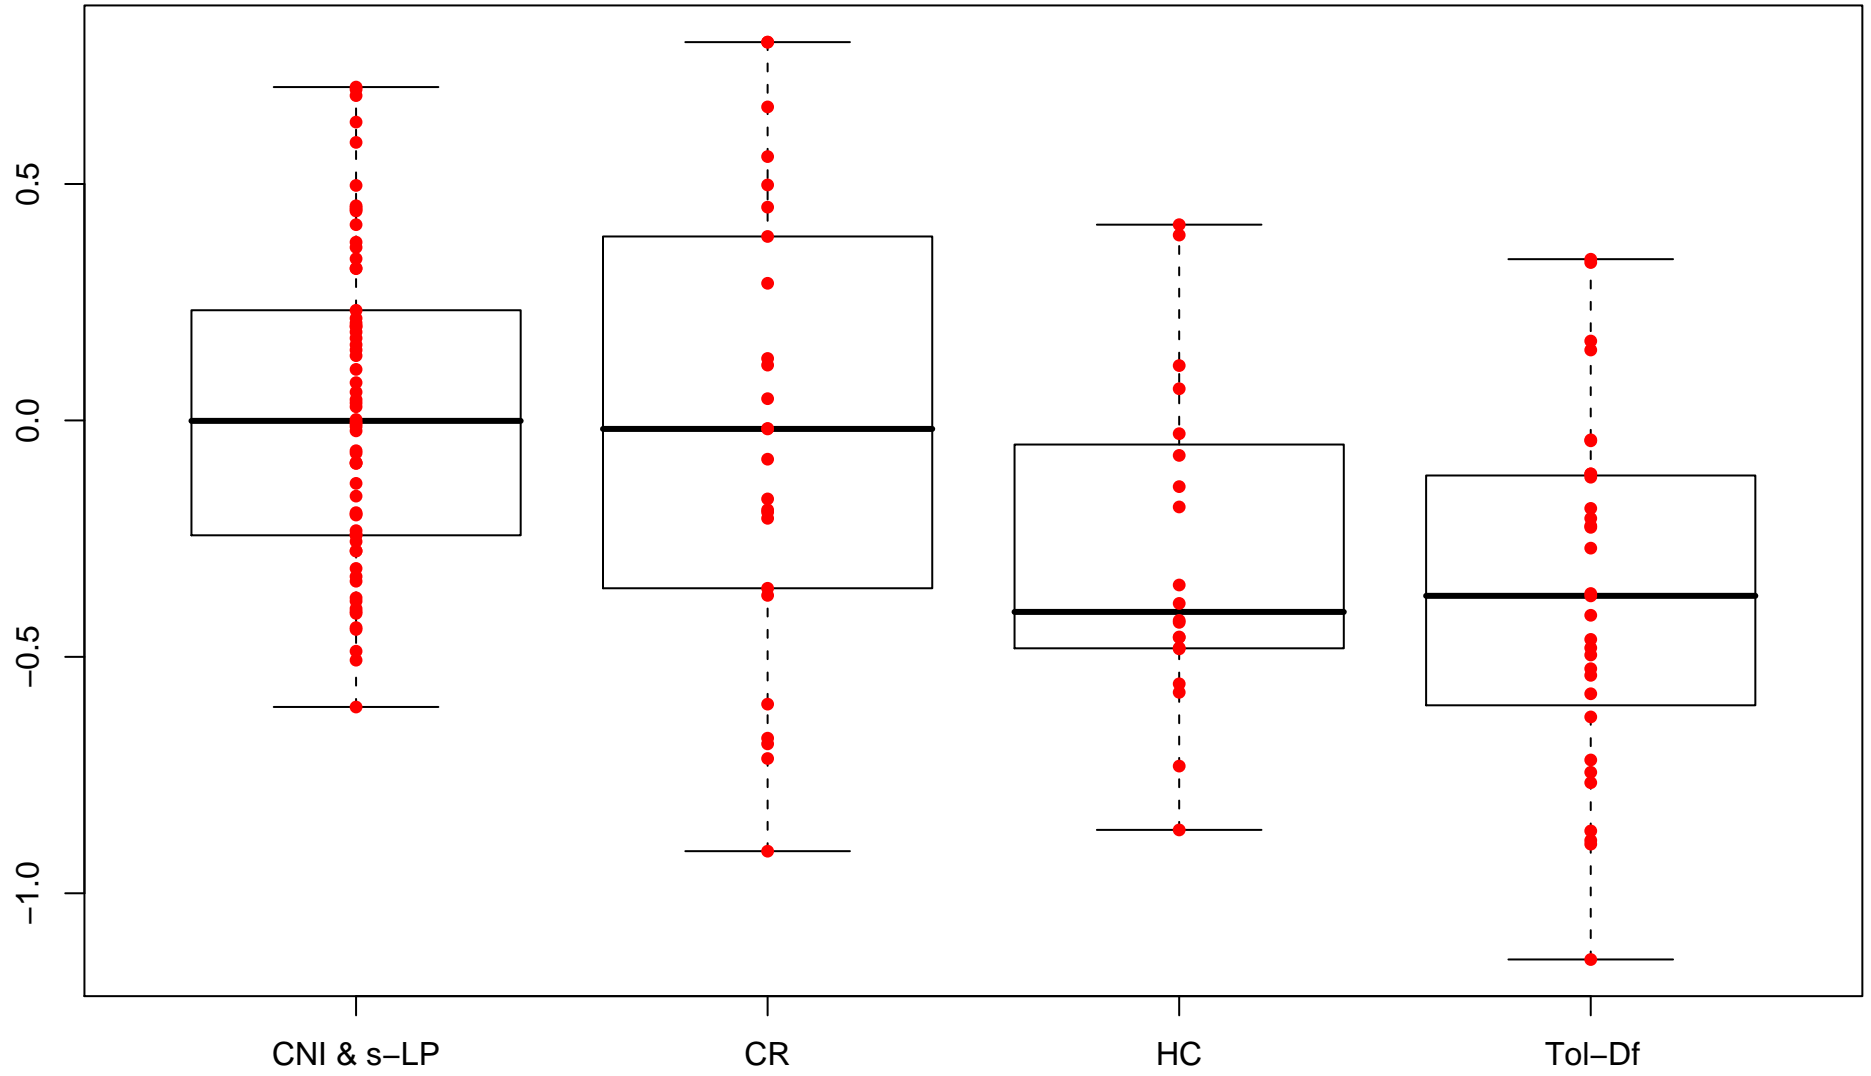



Rank 256 : MTX3  
1.816e-05

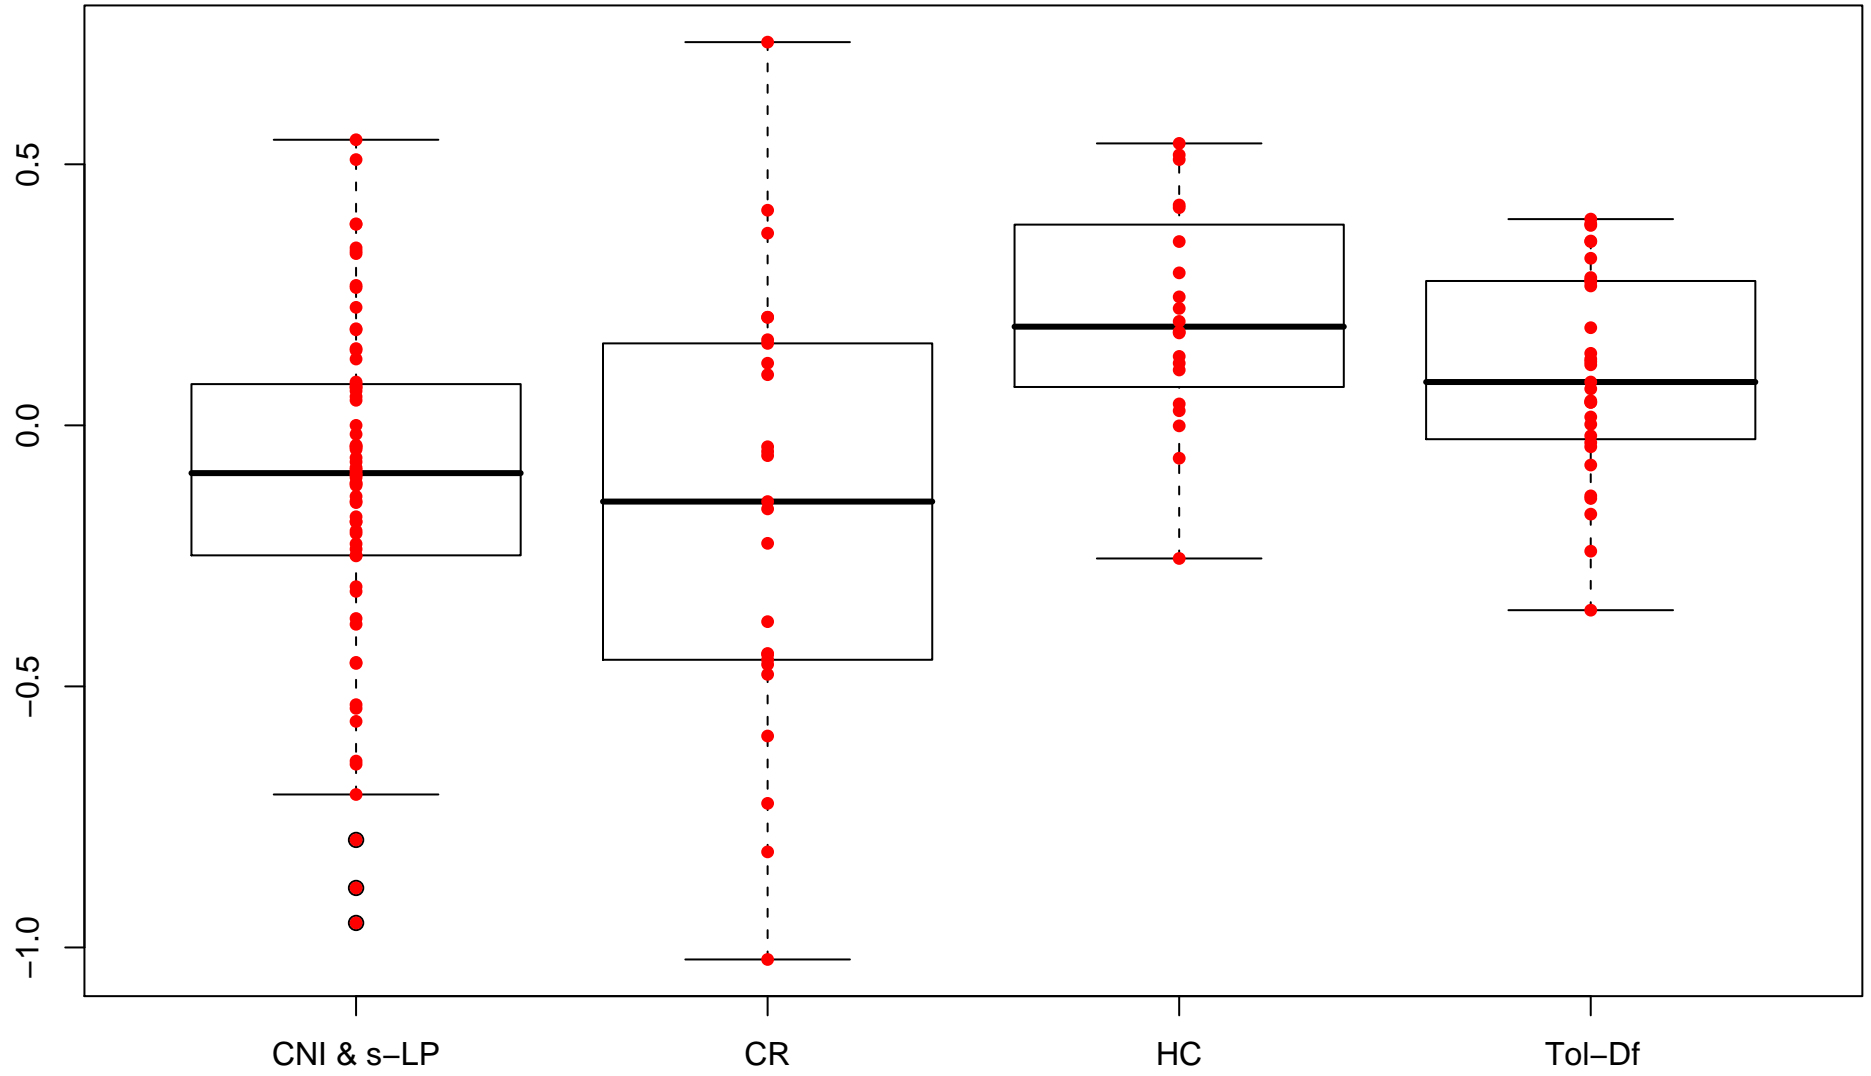

Rank 257 : DDEF1IT1  
1.825e-05

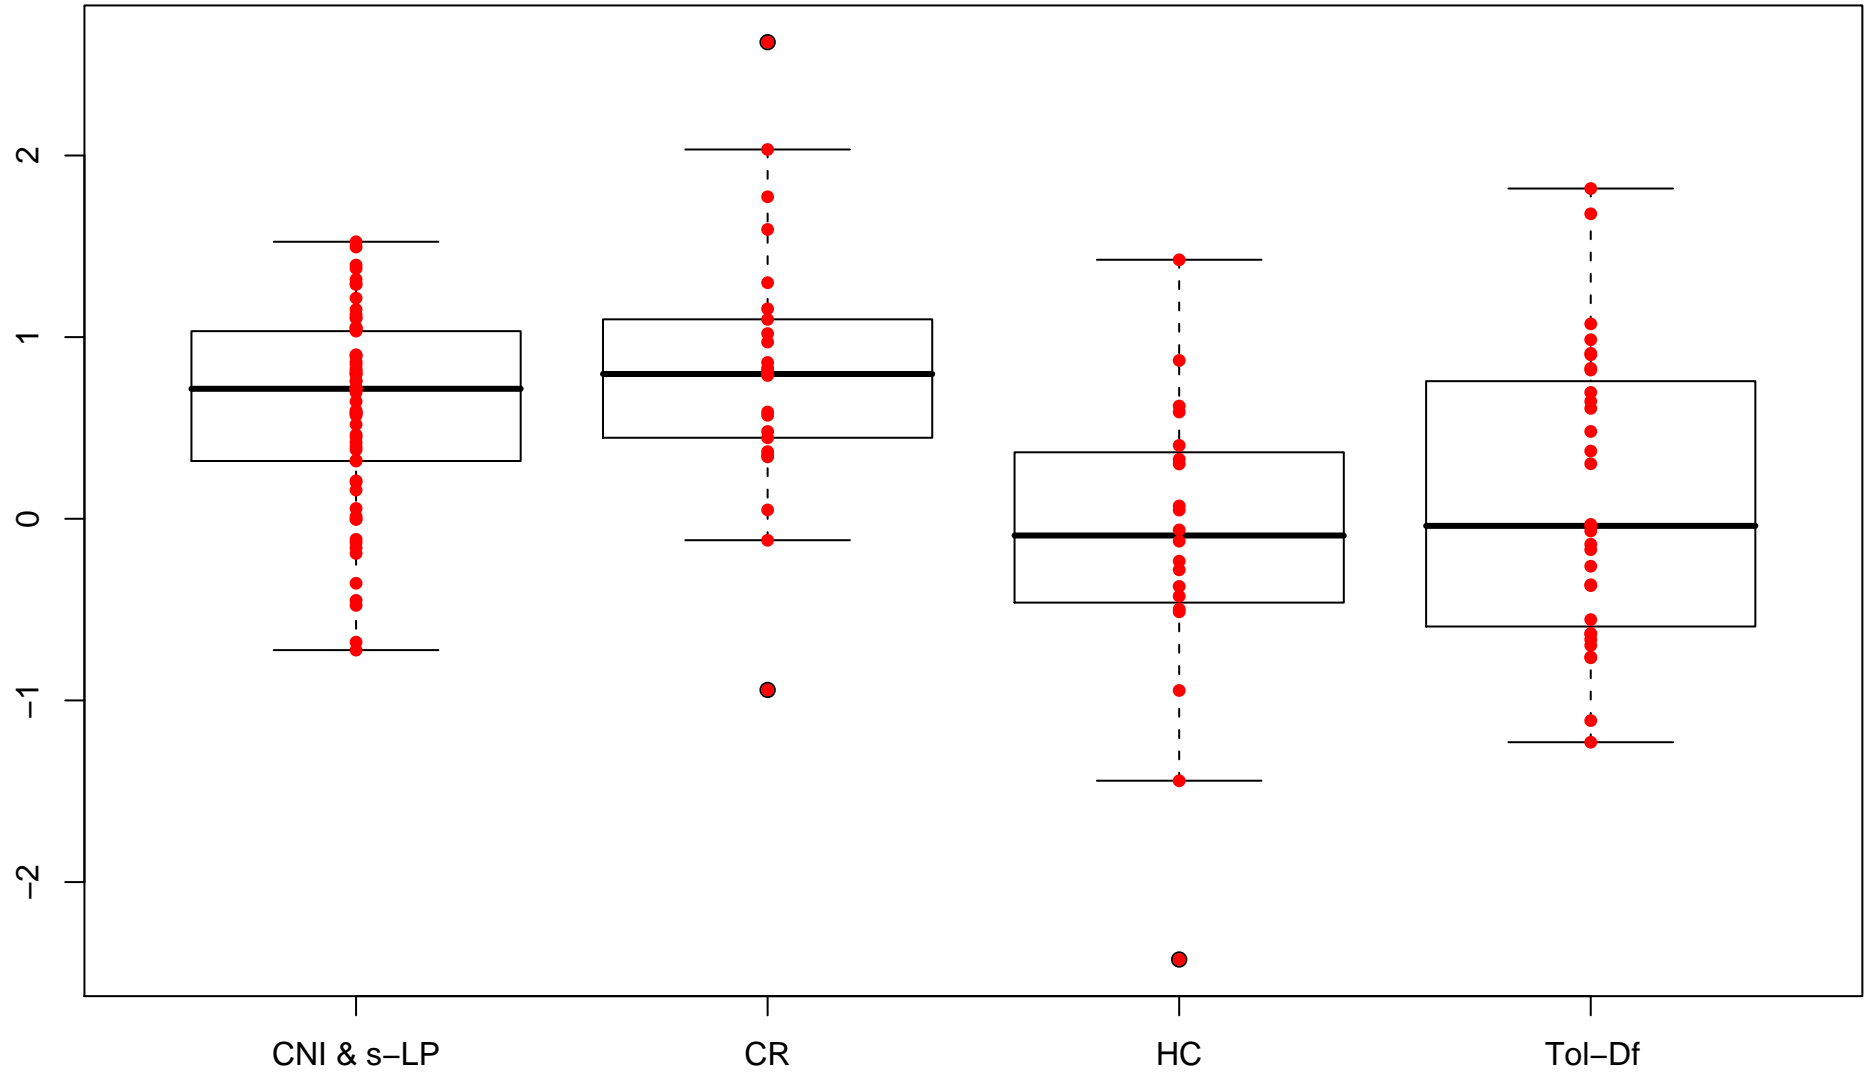

Rank 258 : LOC100129122  
1.8654e-05

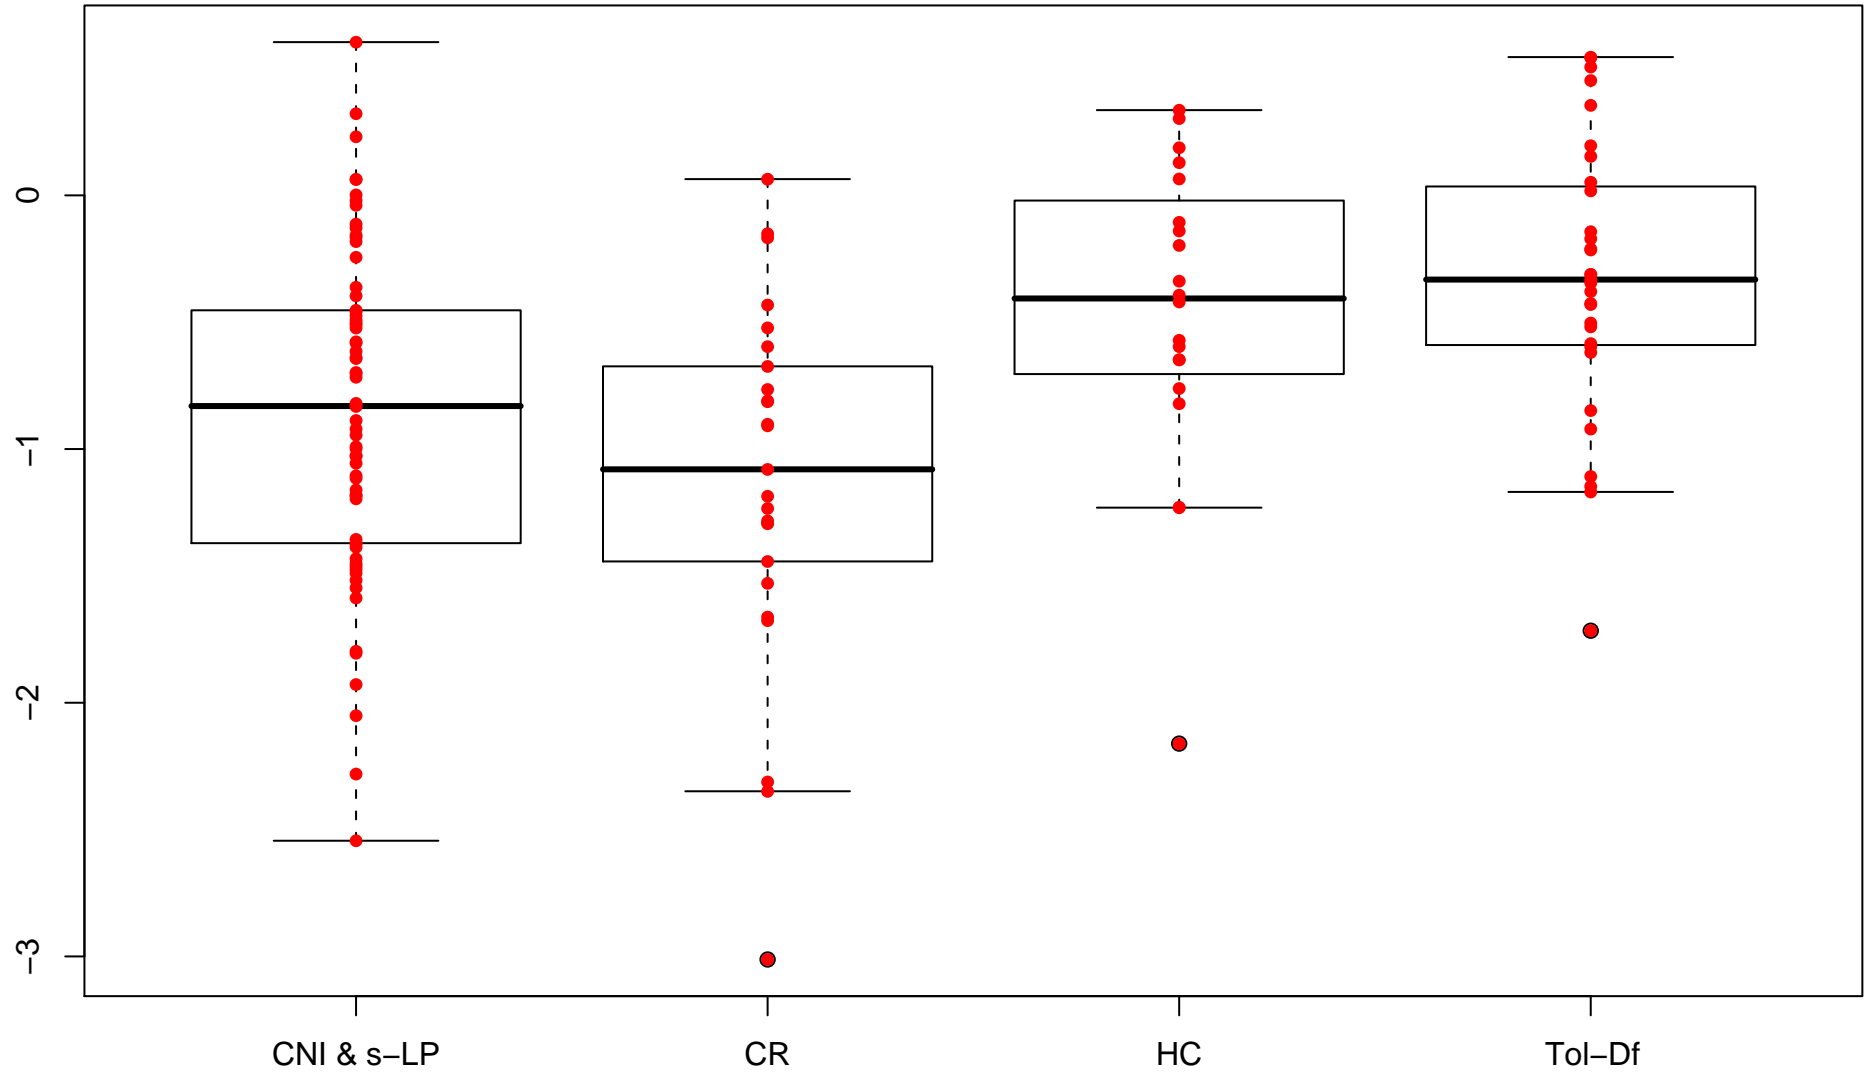

Rank 259 : PDE2A  
1.9686e-05

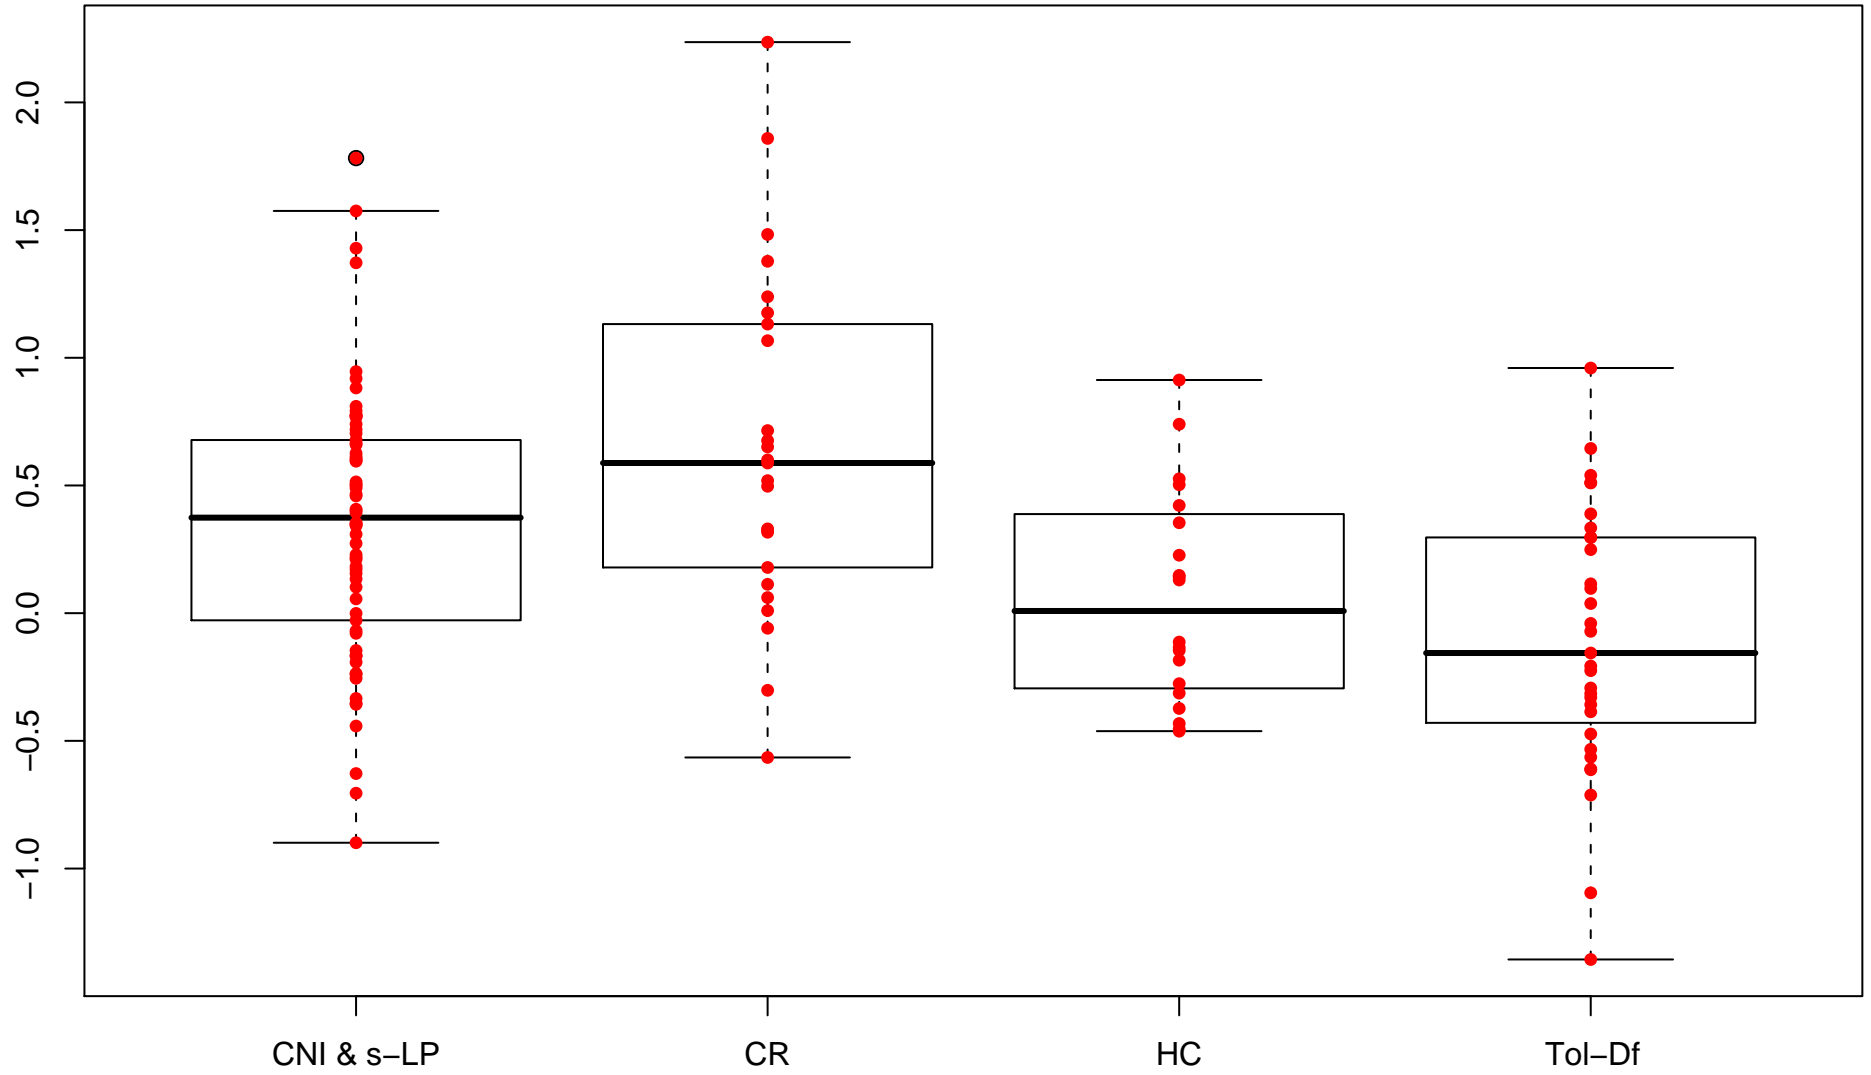

Rank 260 : ITGAM  
1.9926e-05

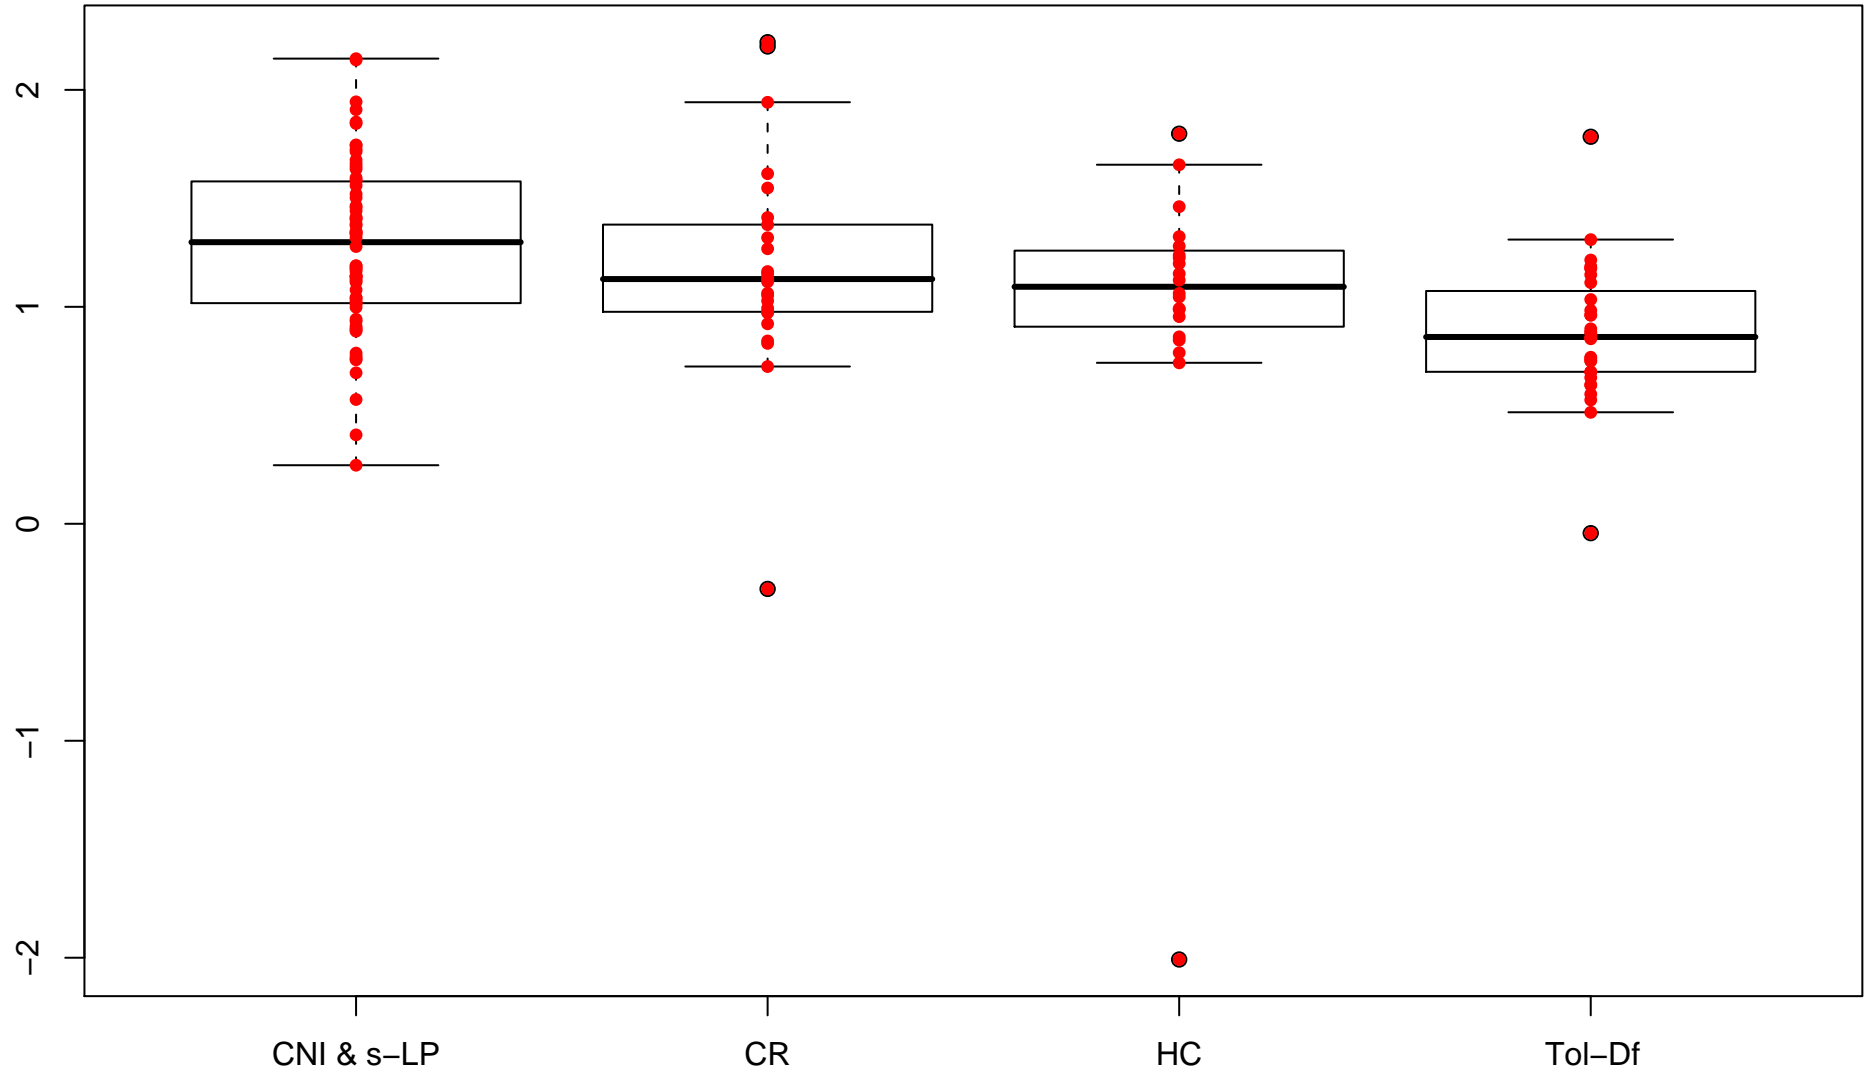

Rank 261 : MIZF  
2.0062e-05

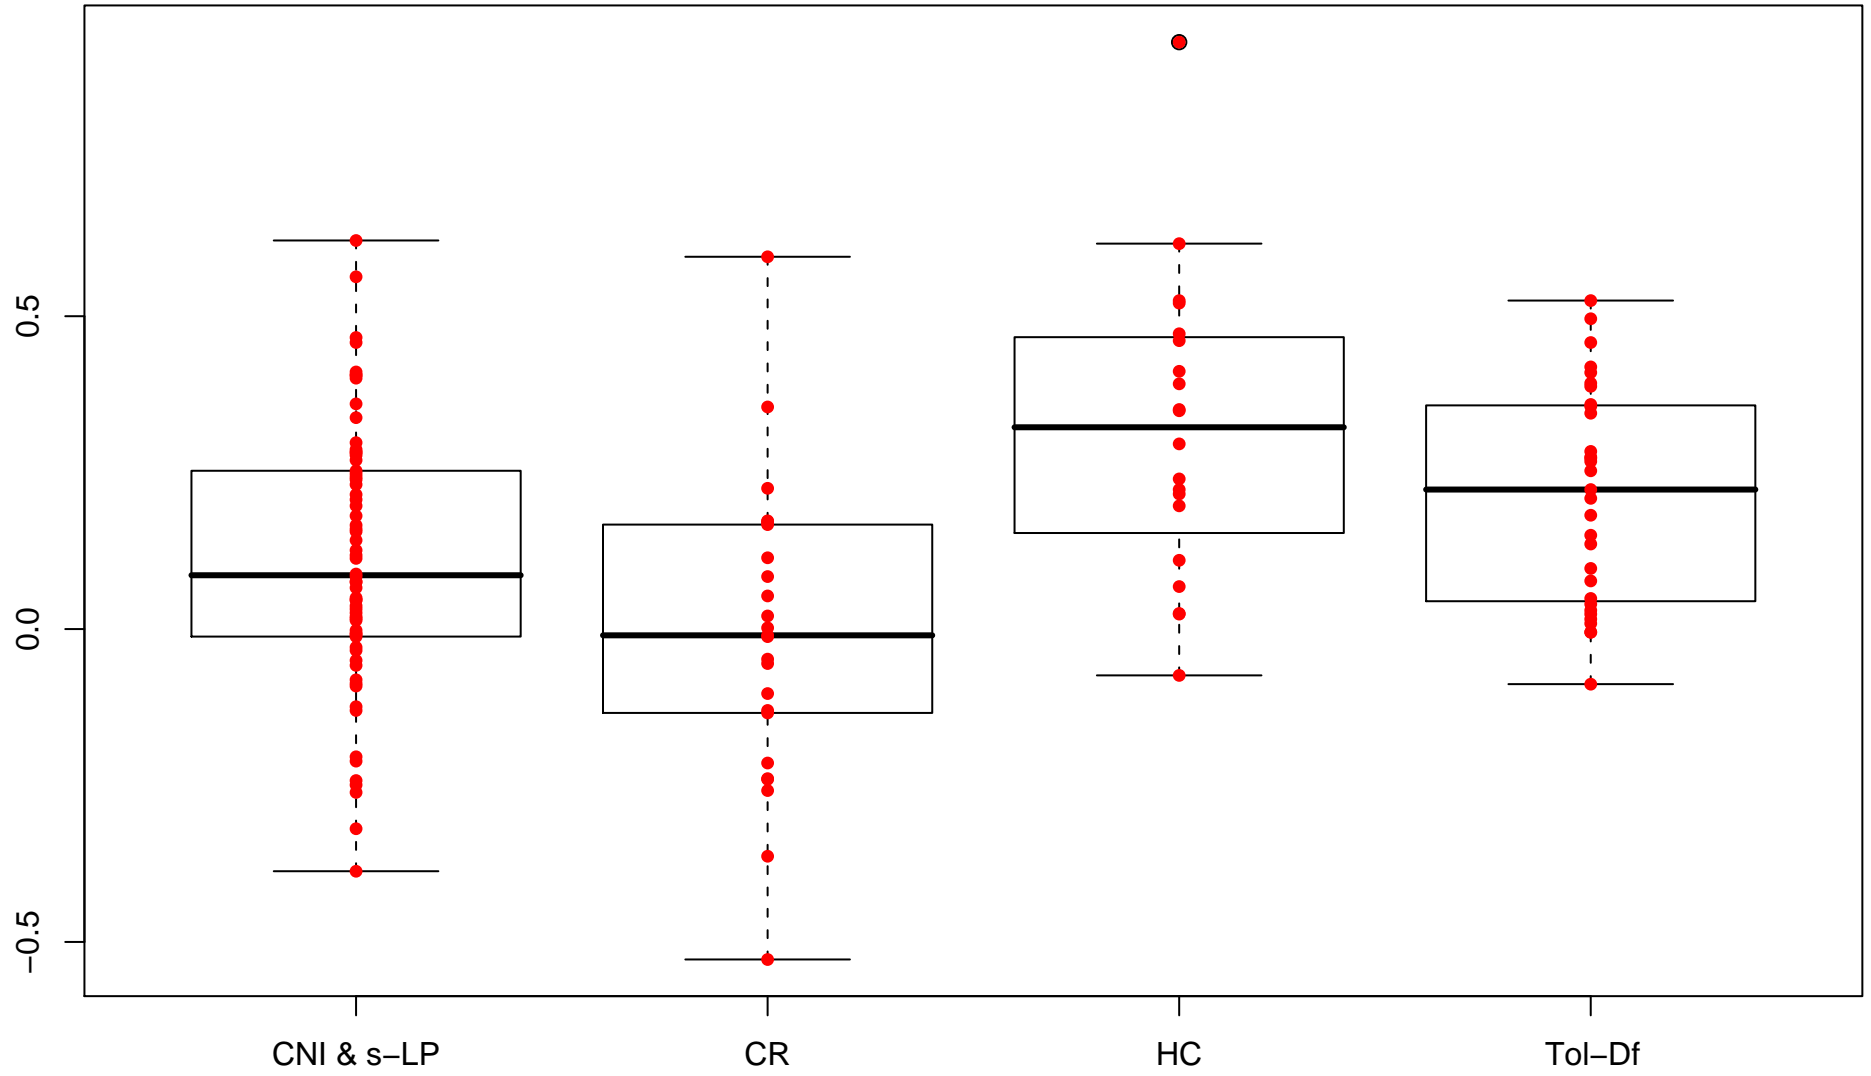

Rank 262 : SET  
2.0087e-05

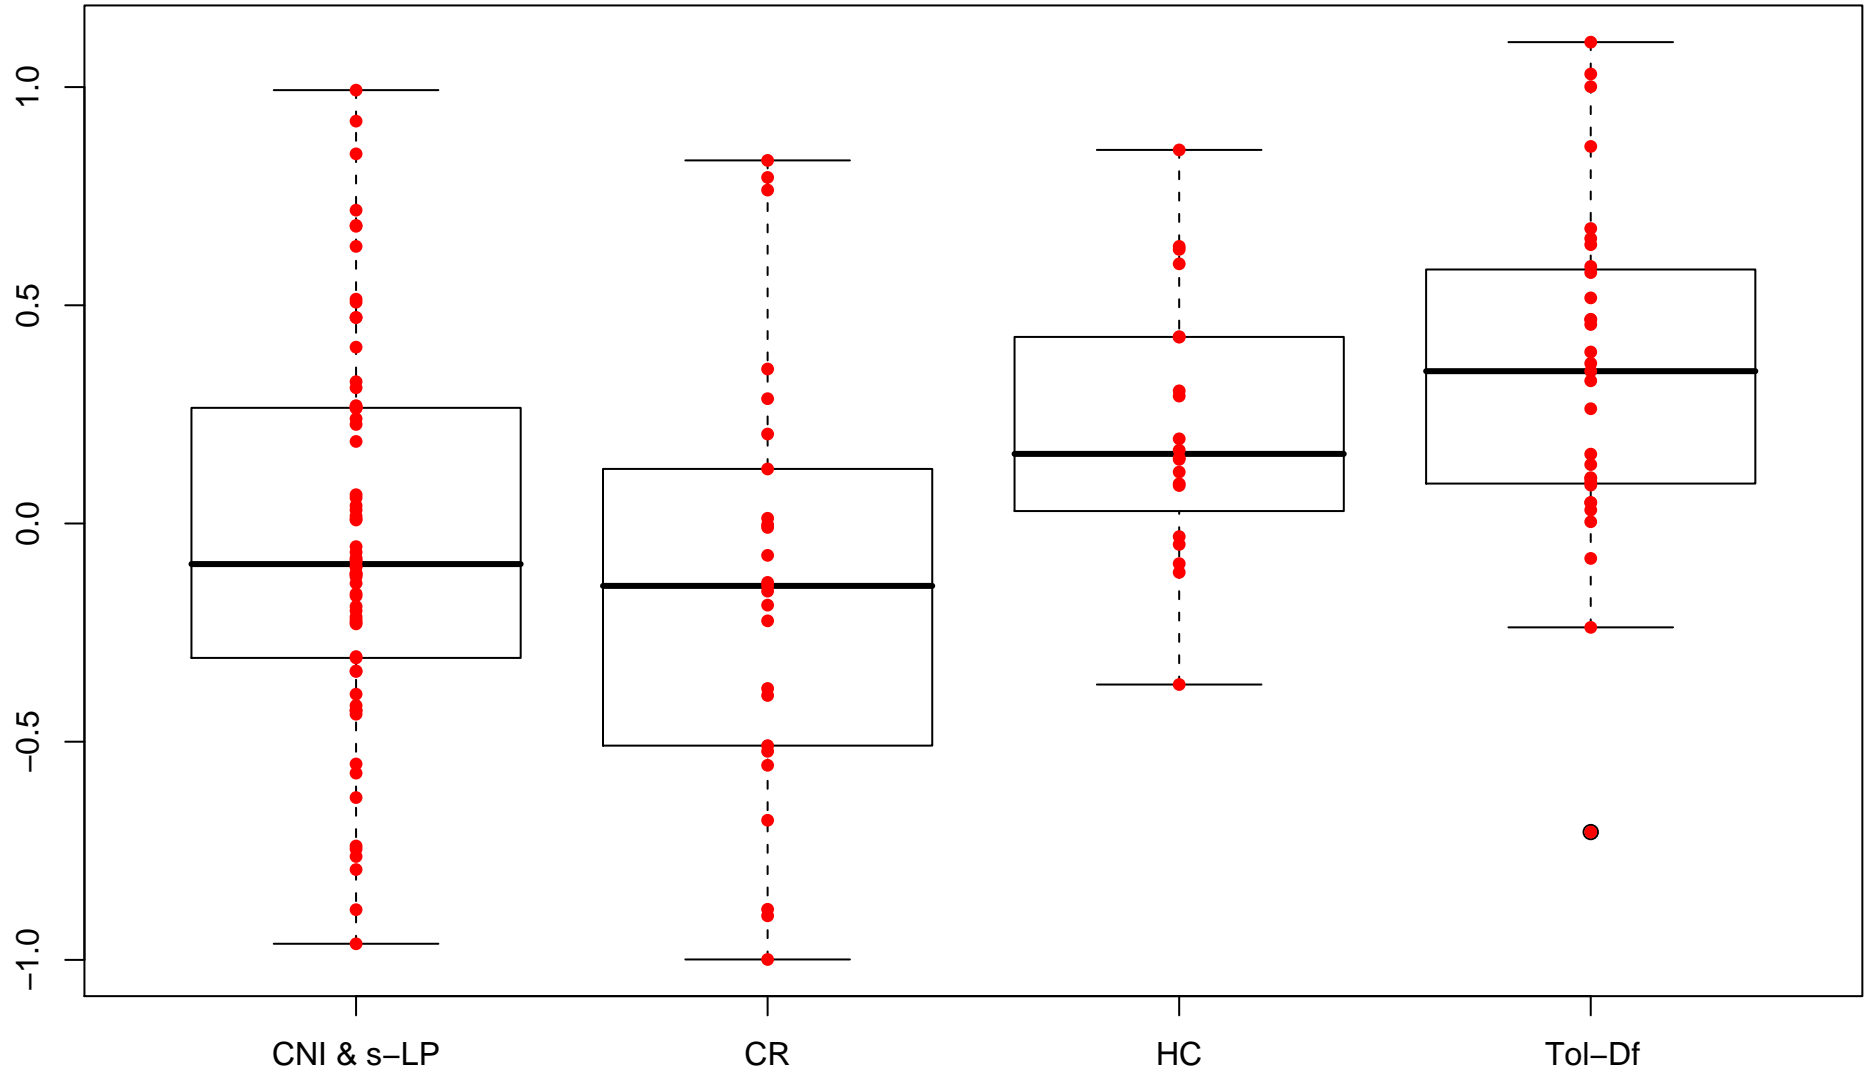

Rank 263 : RBBP9  
2.0936e-05

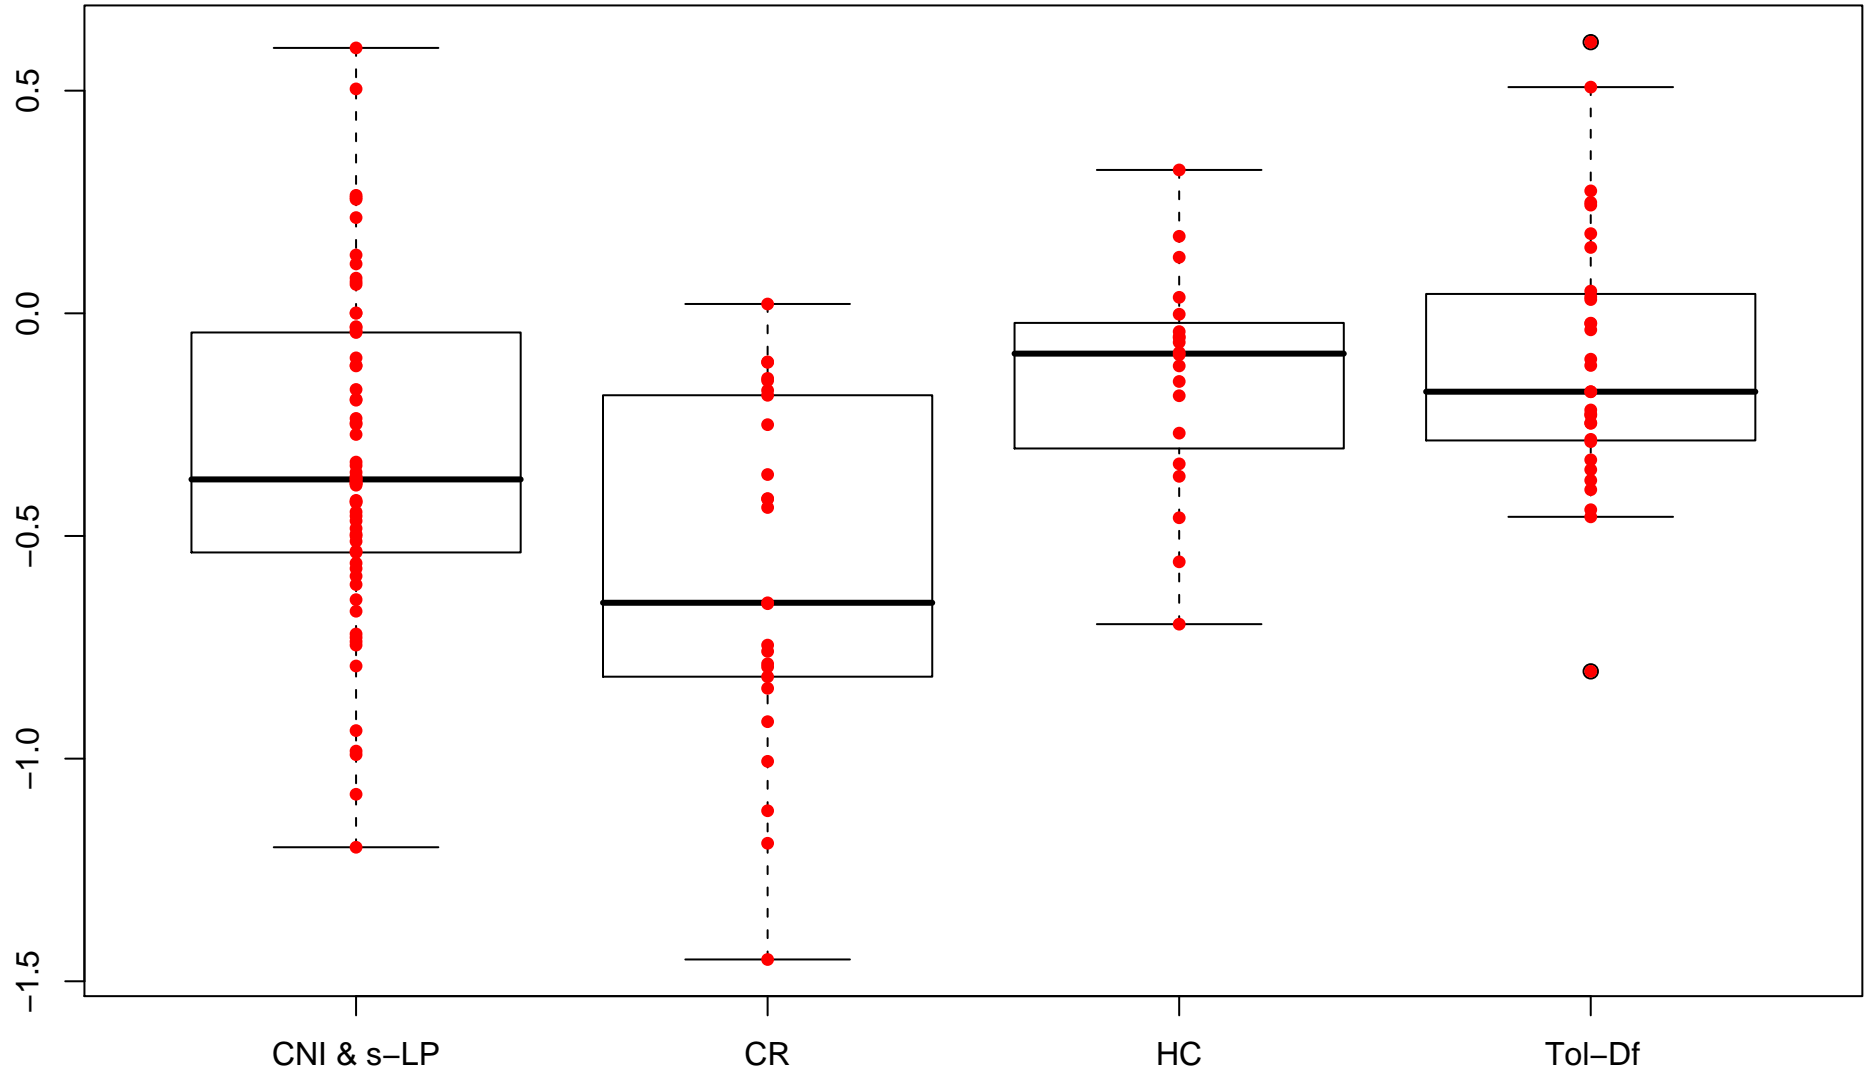



Rank 264 : SLC26A8  
2.1207e-05

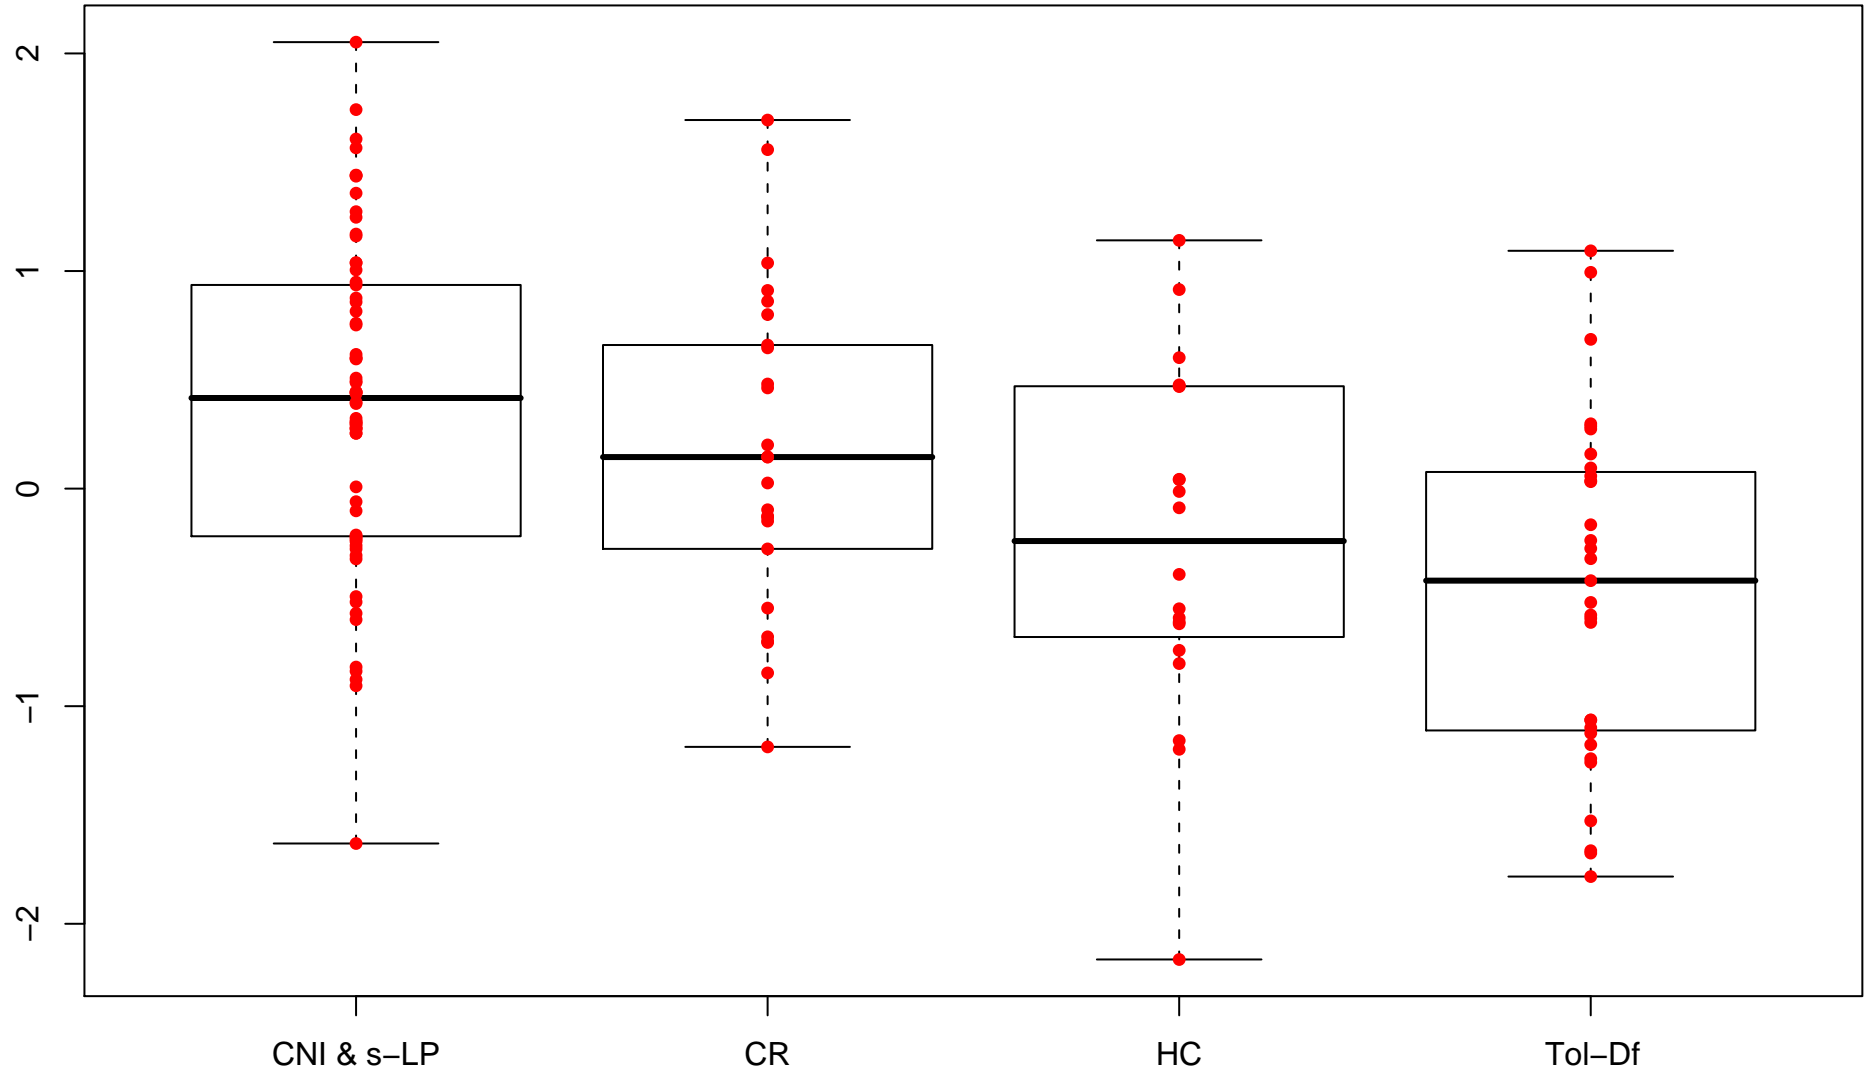

Rank 265 : A\_24\_P110487  
2.137e-05

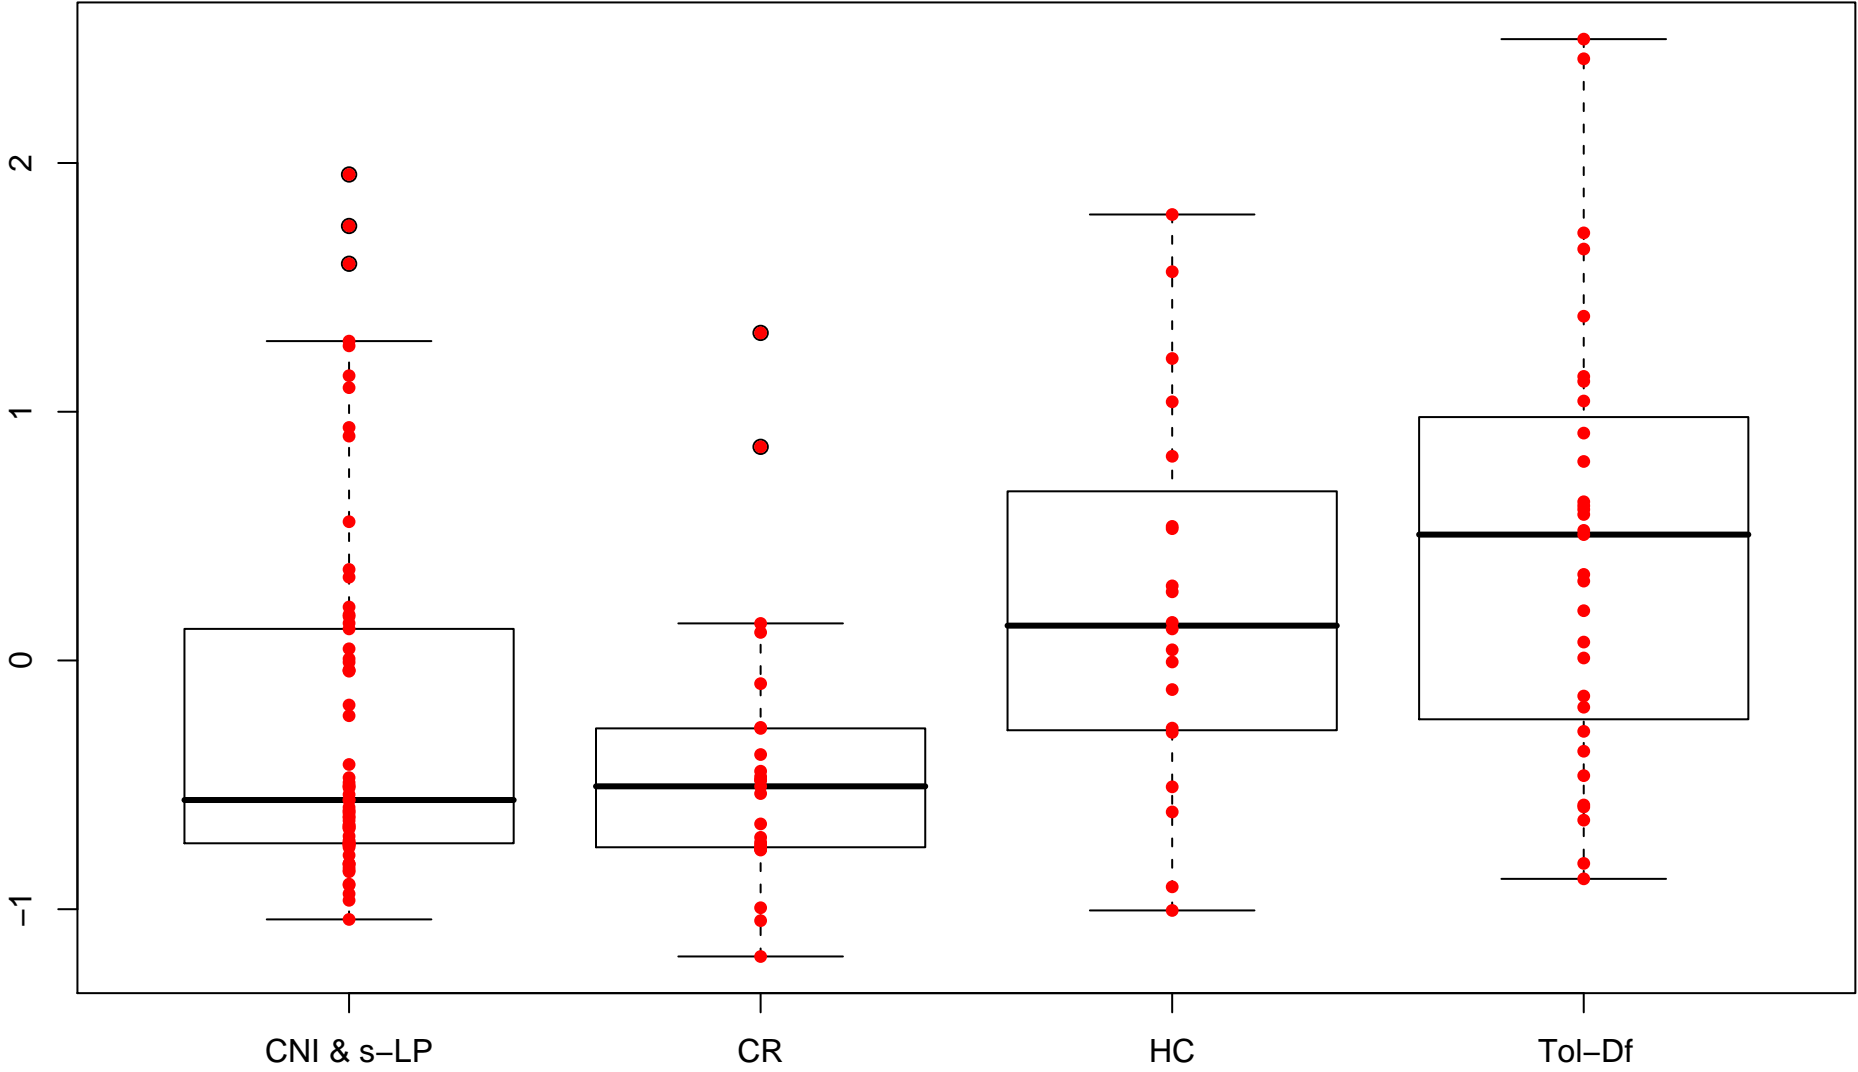

Rank 266 : IL10RA  
2.1382e-05

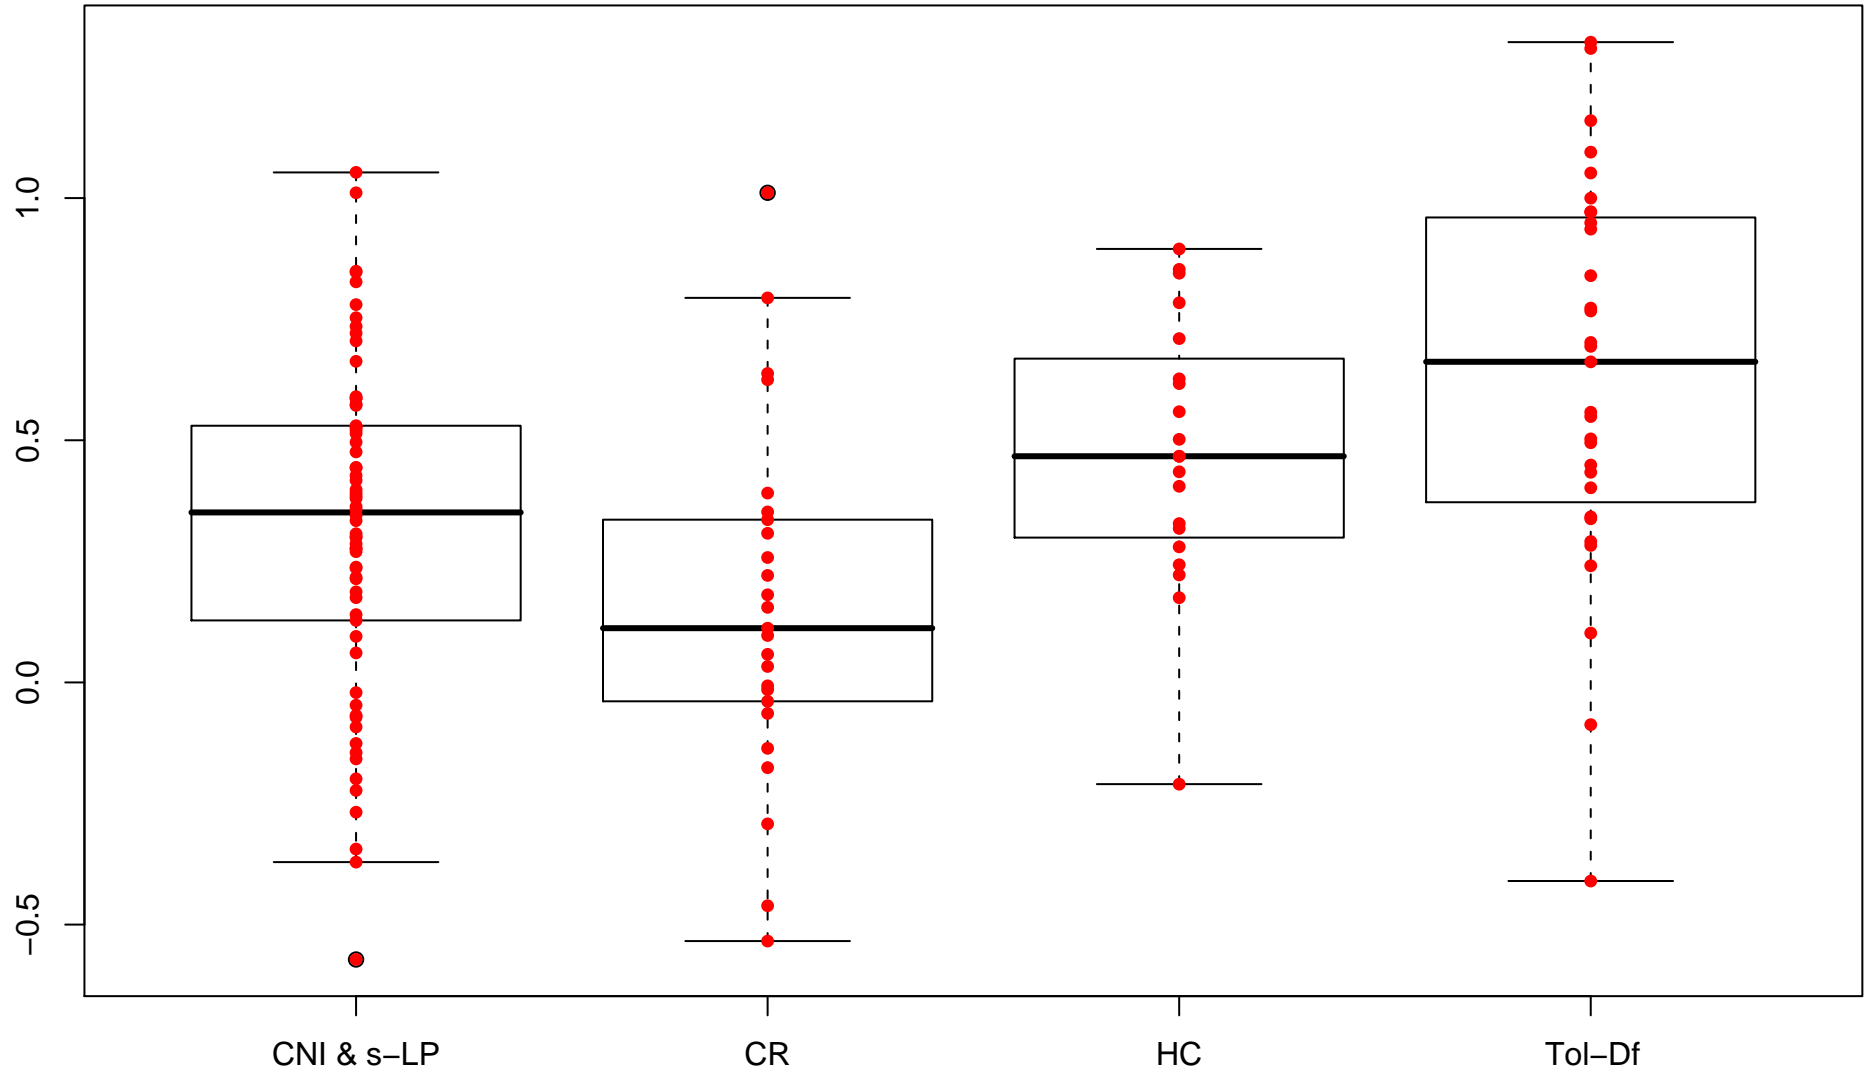

Rank 267 : FLJ22662  
2.2268e-05

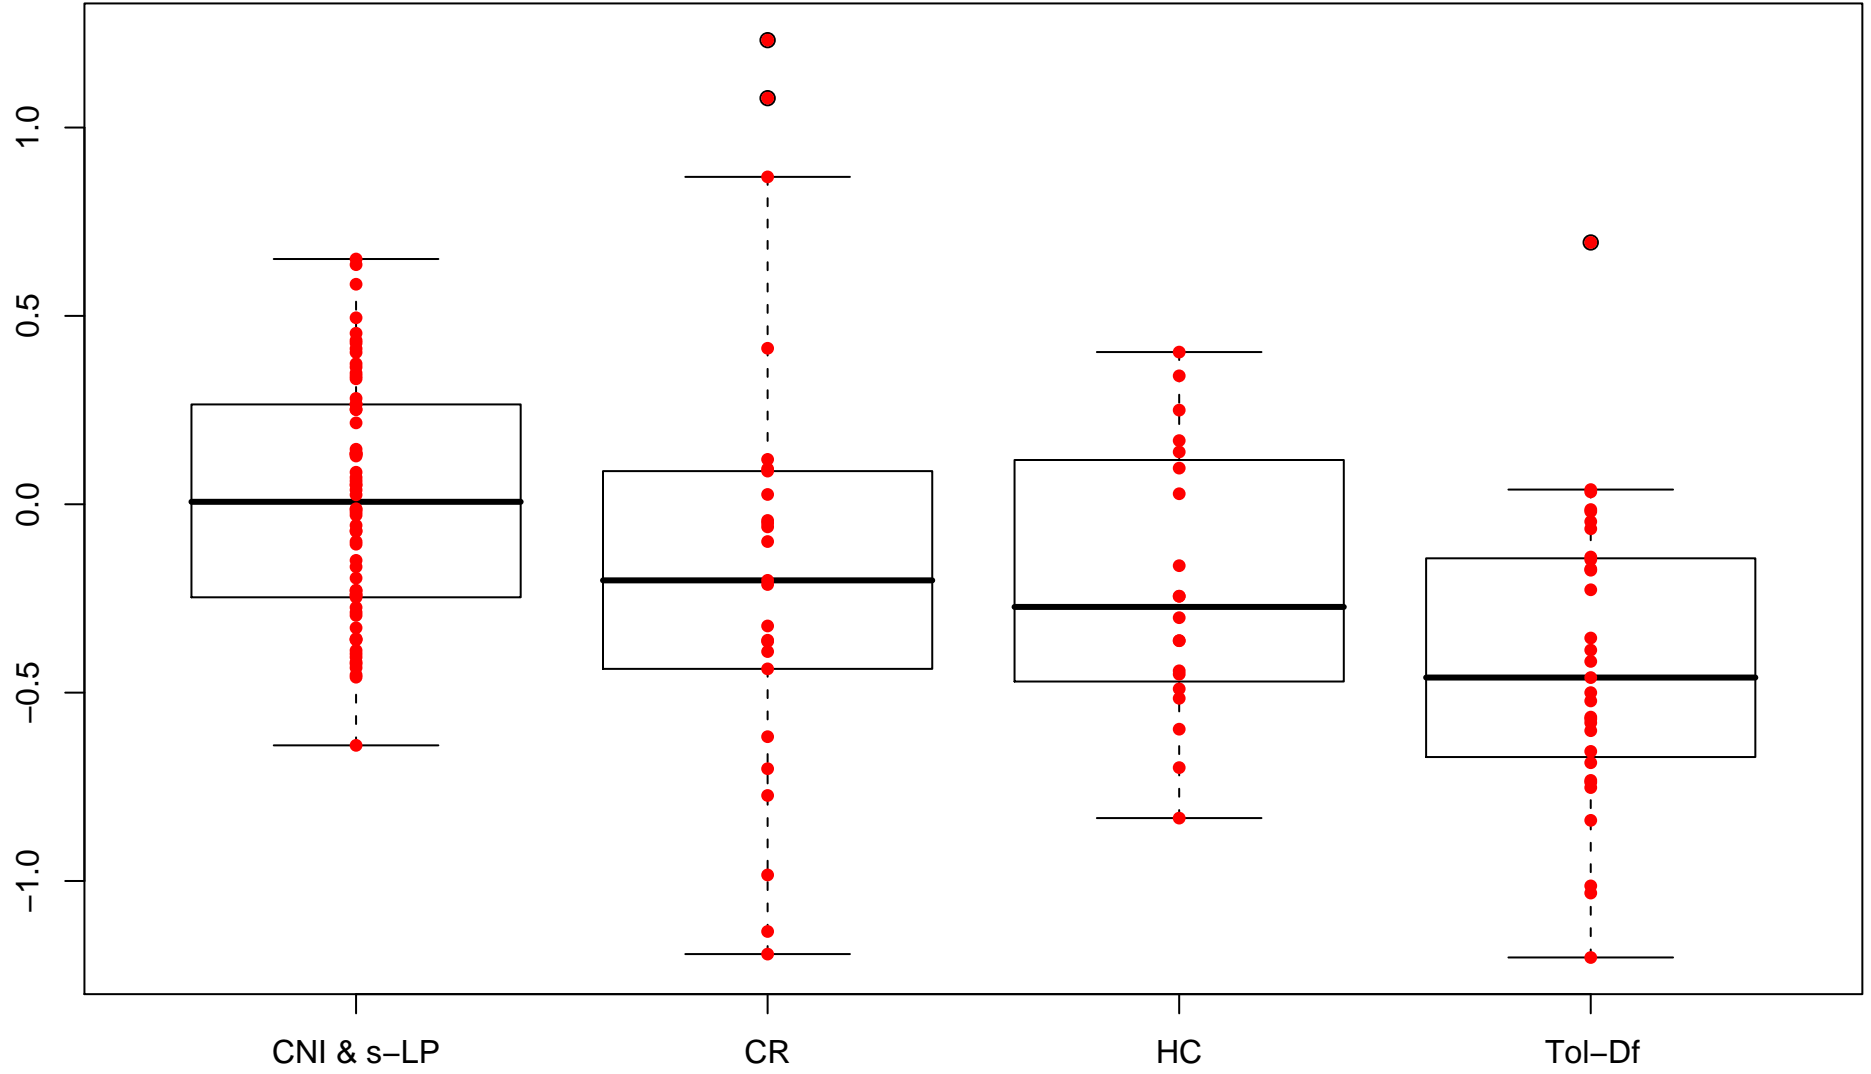

Rank 268 : SPI1  
2.2331e-05

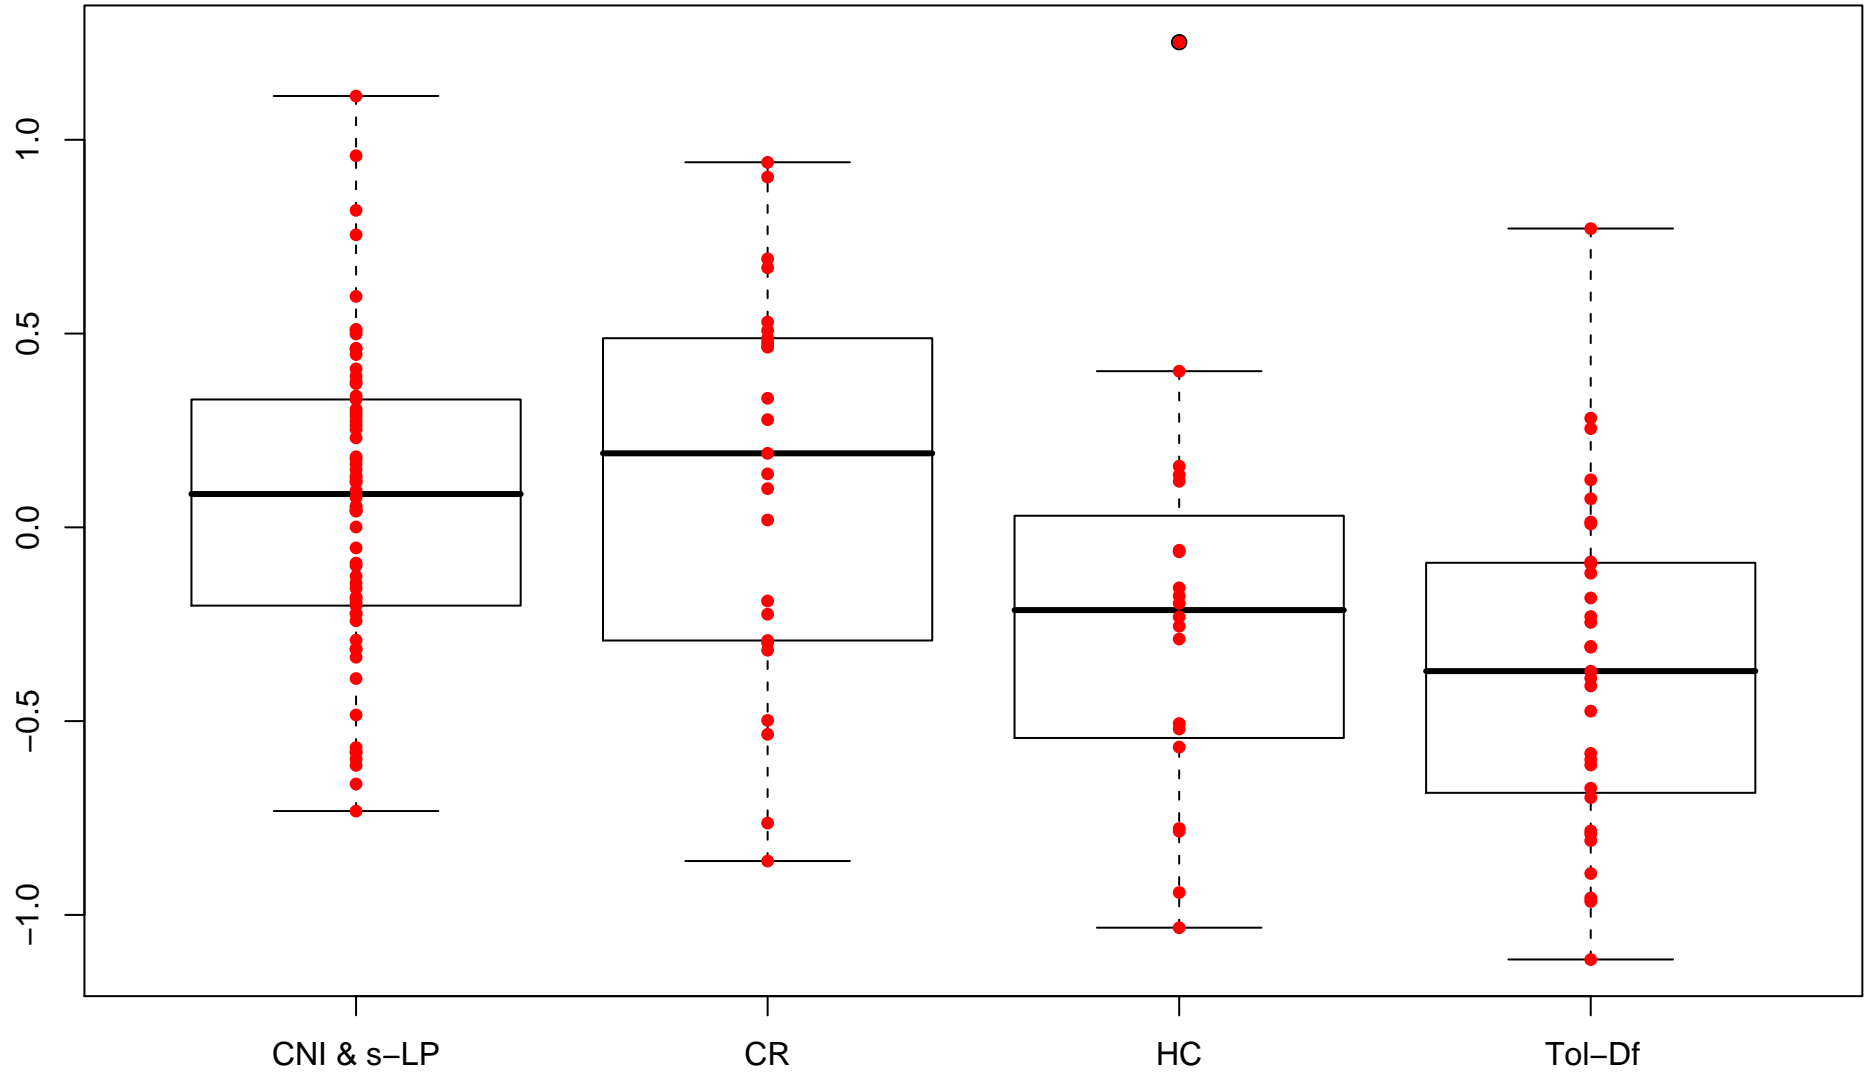

Rank 269 : THC2296737  
2.2371e-05

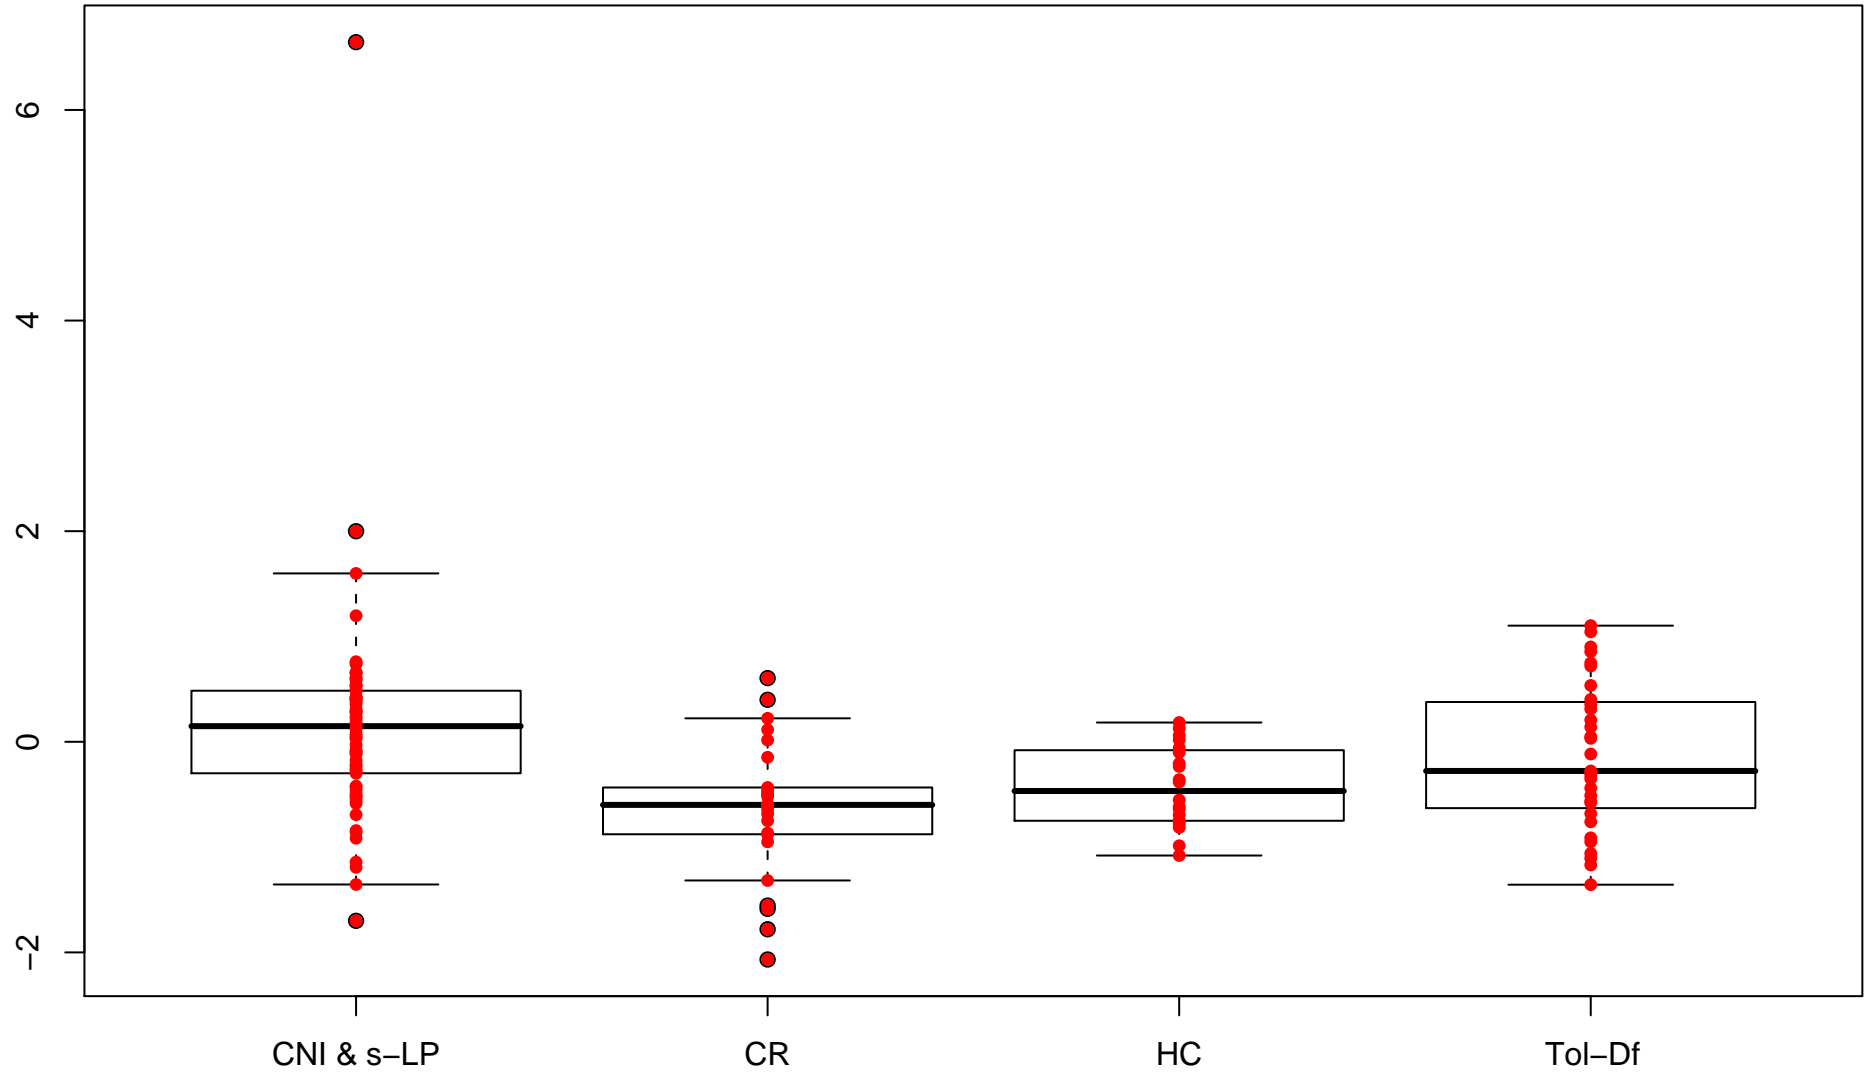

Rank 270 : LMNA  
2.2509e-05

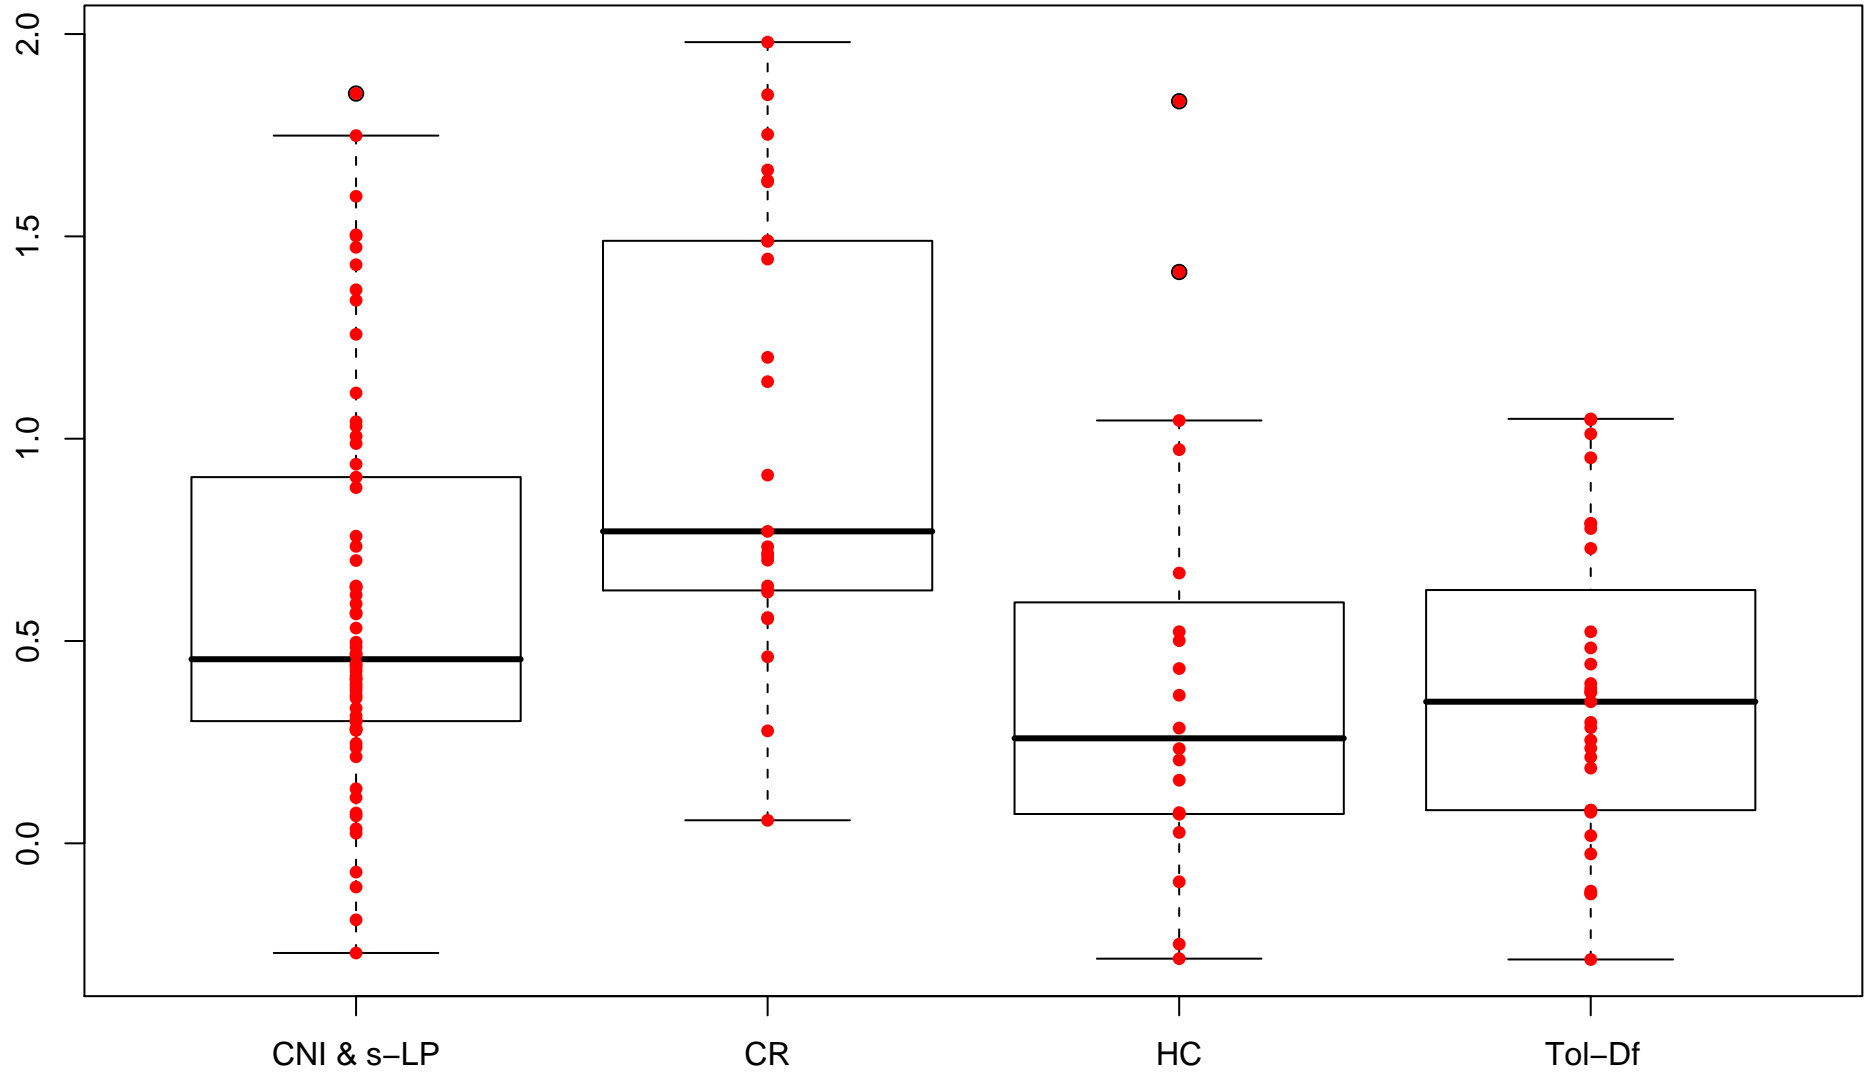

Rank 271 : FCER1A  
2.2646e-05

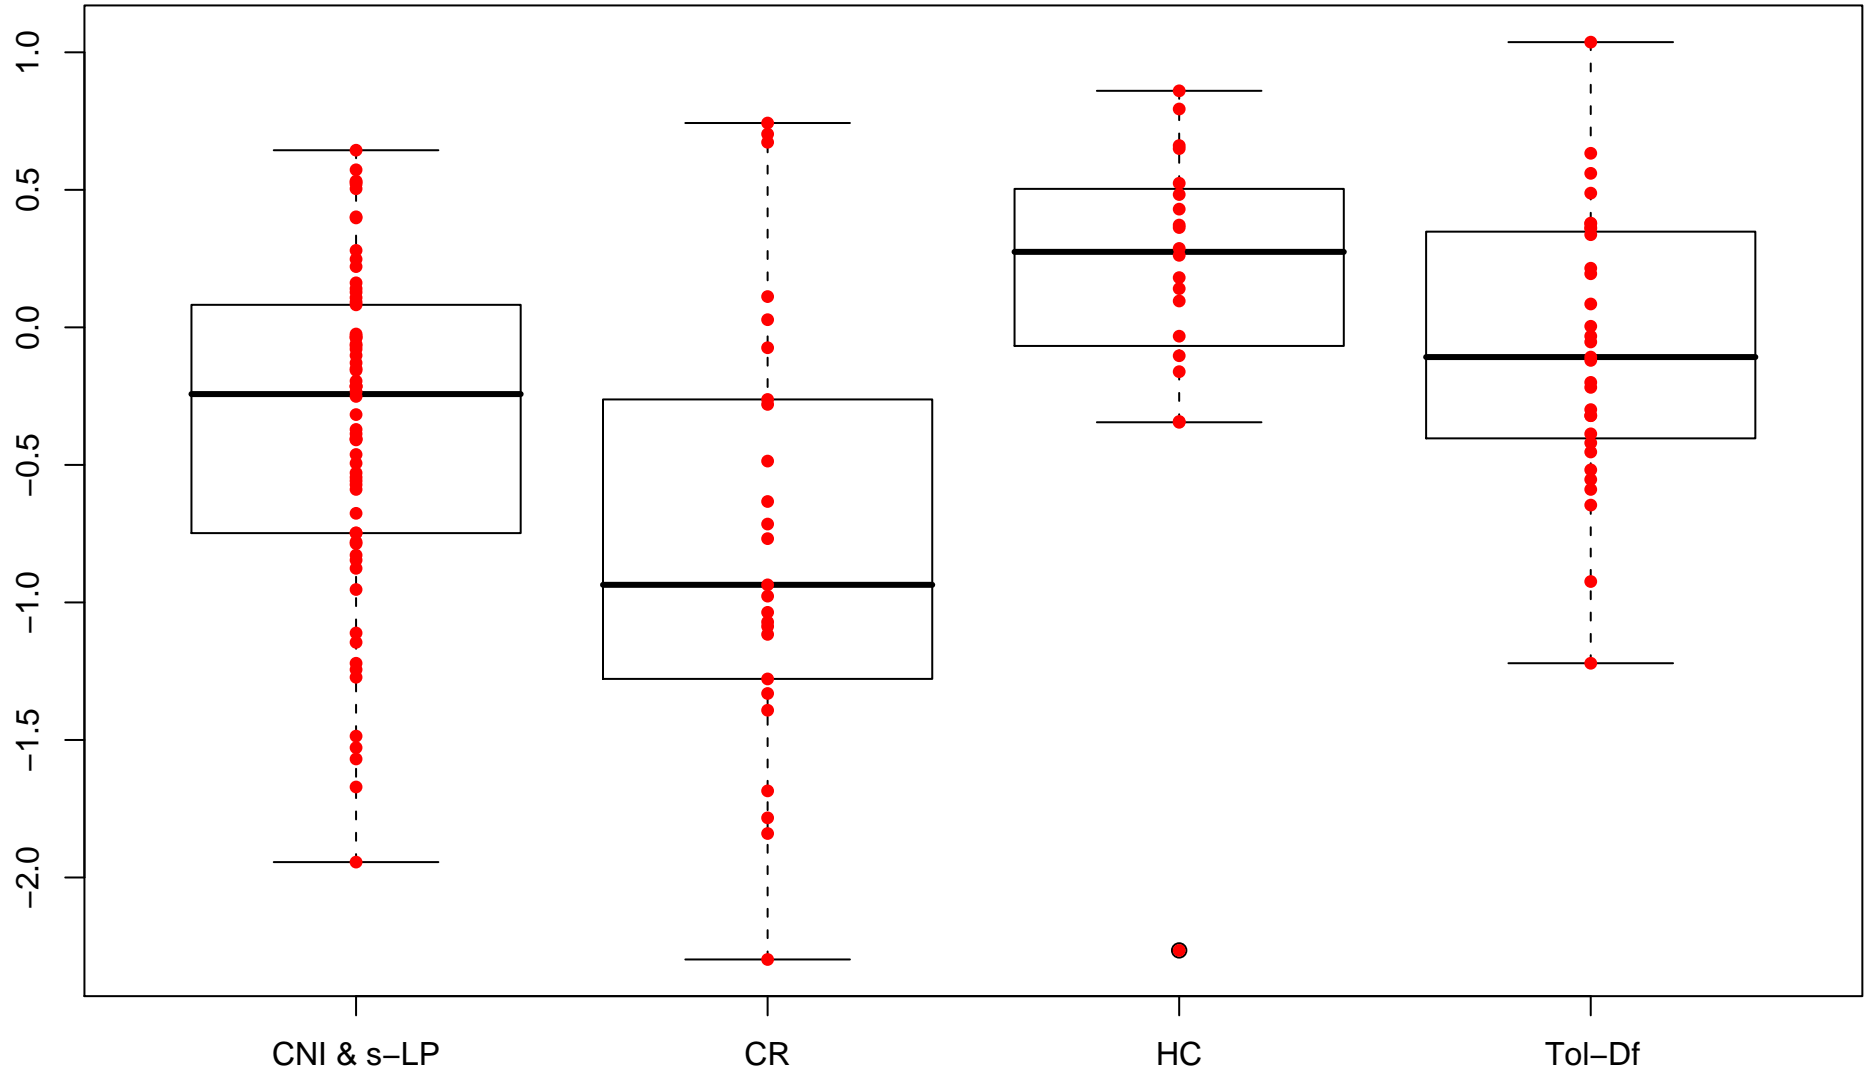



Rank 272 : GCLM  
2.2966e-05

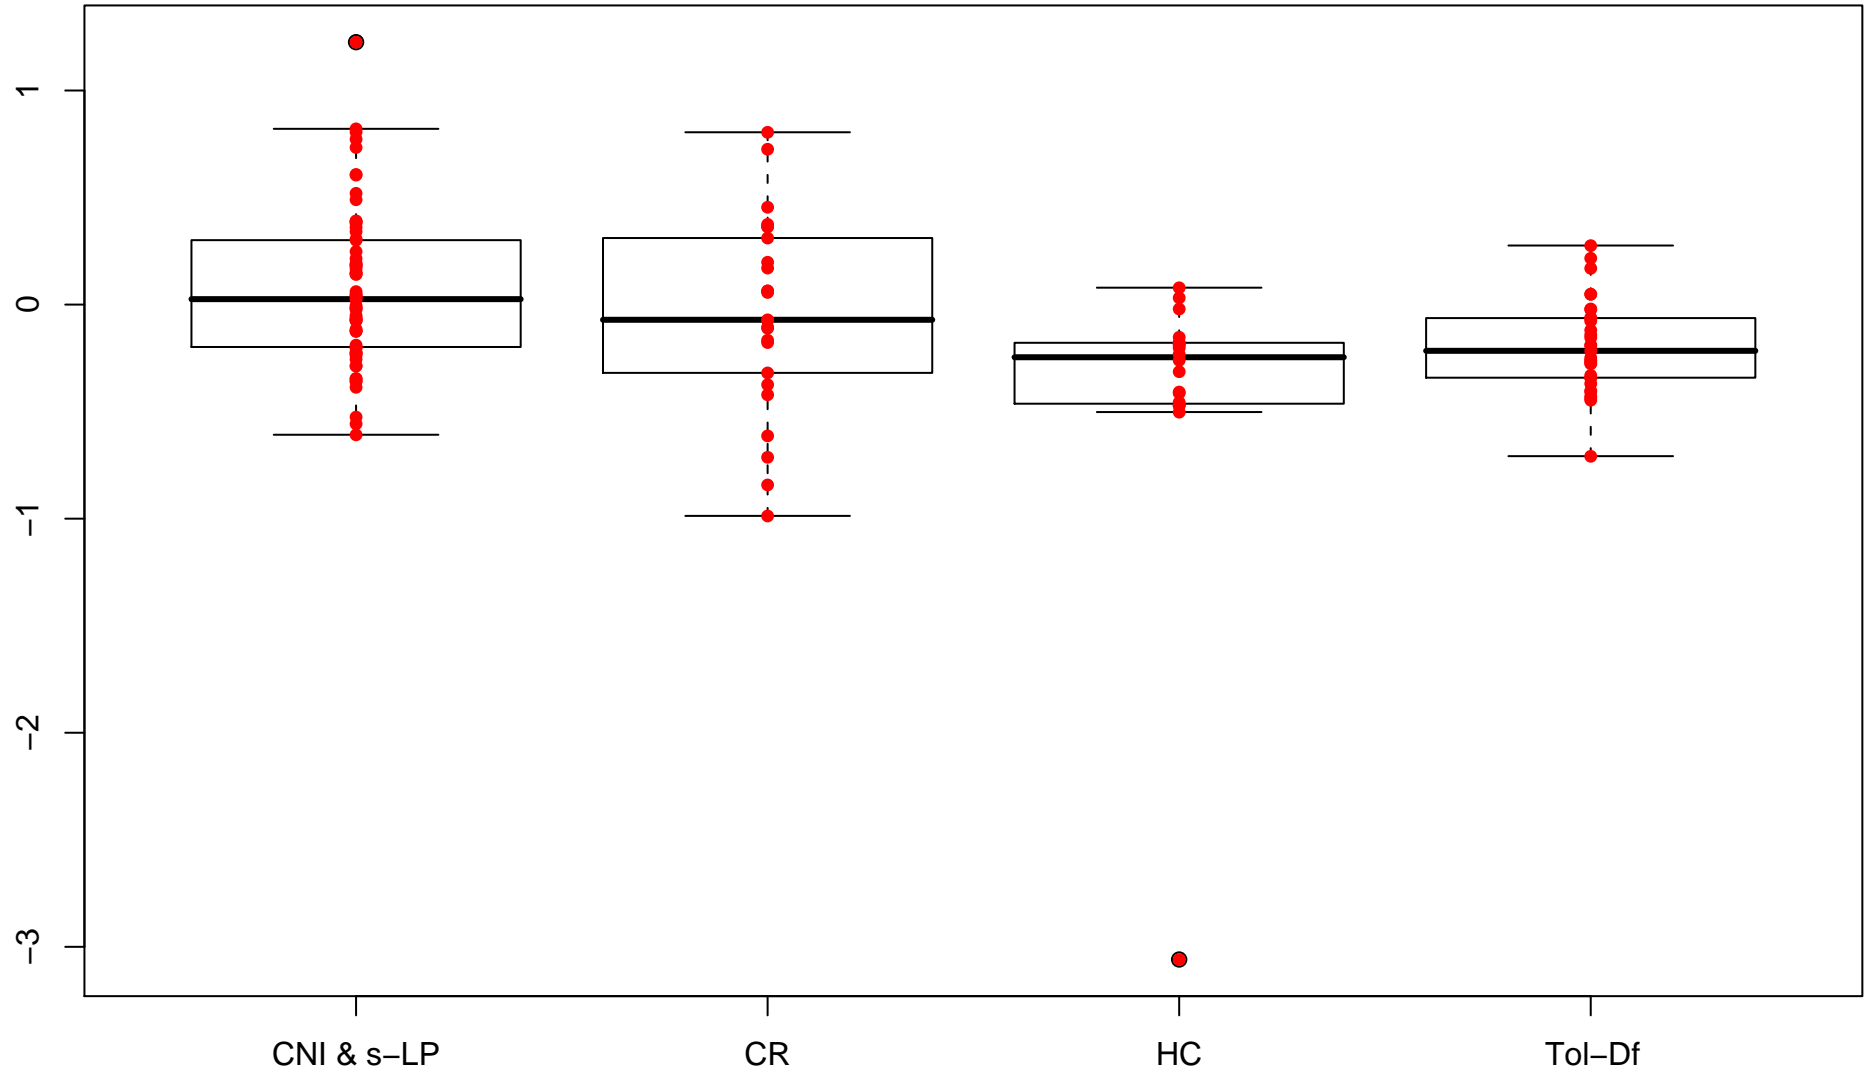

Rank 273 : INTS10  
2.3142e-05

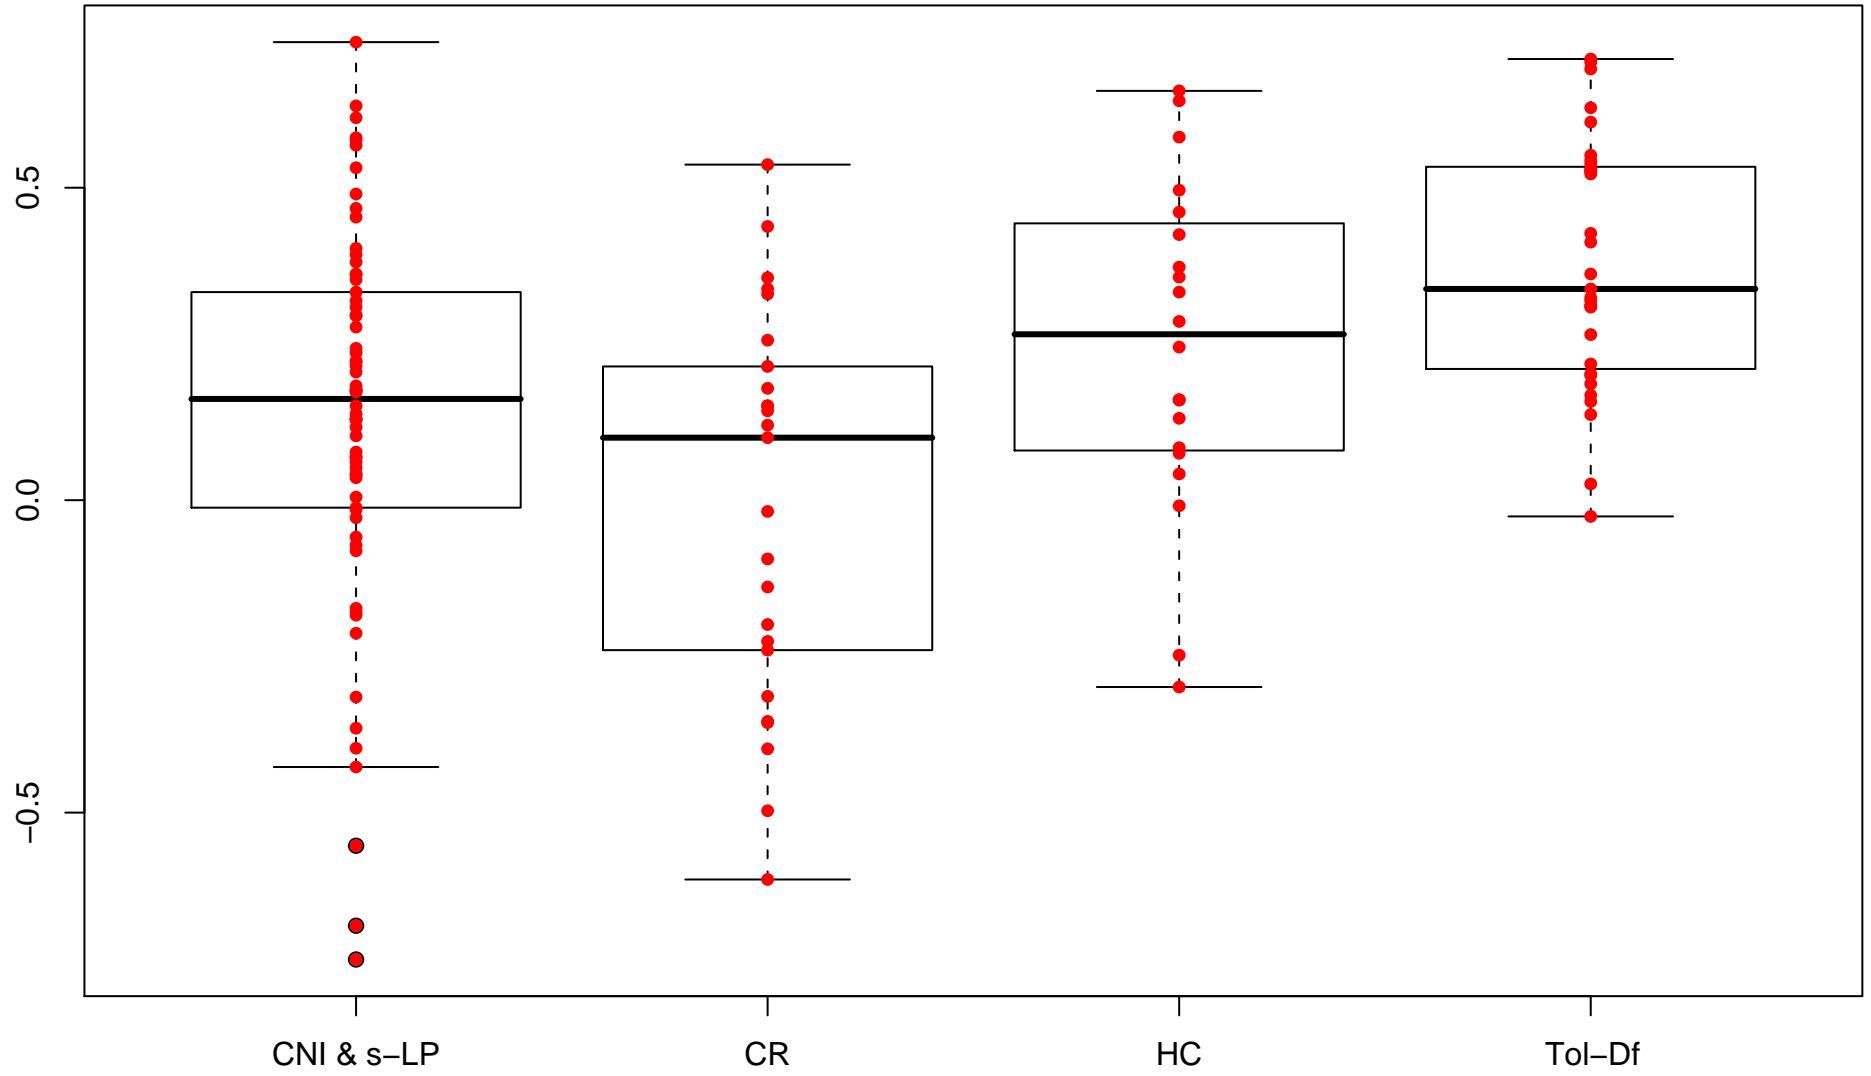

Rank 274 : GPX7  
2.3154e-05

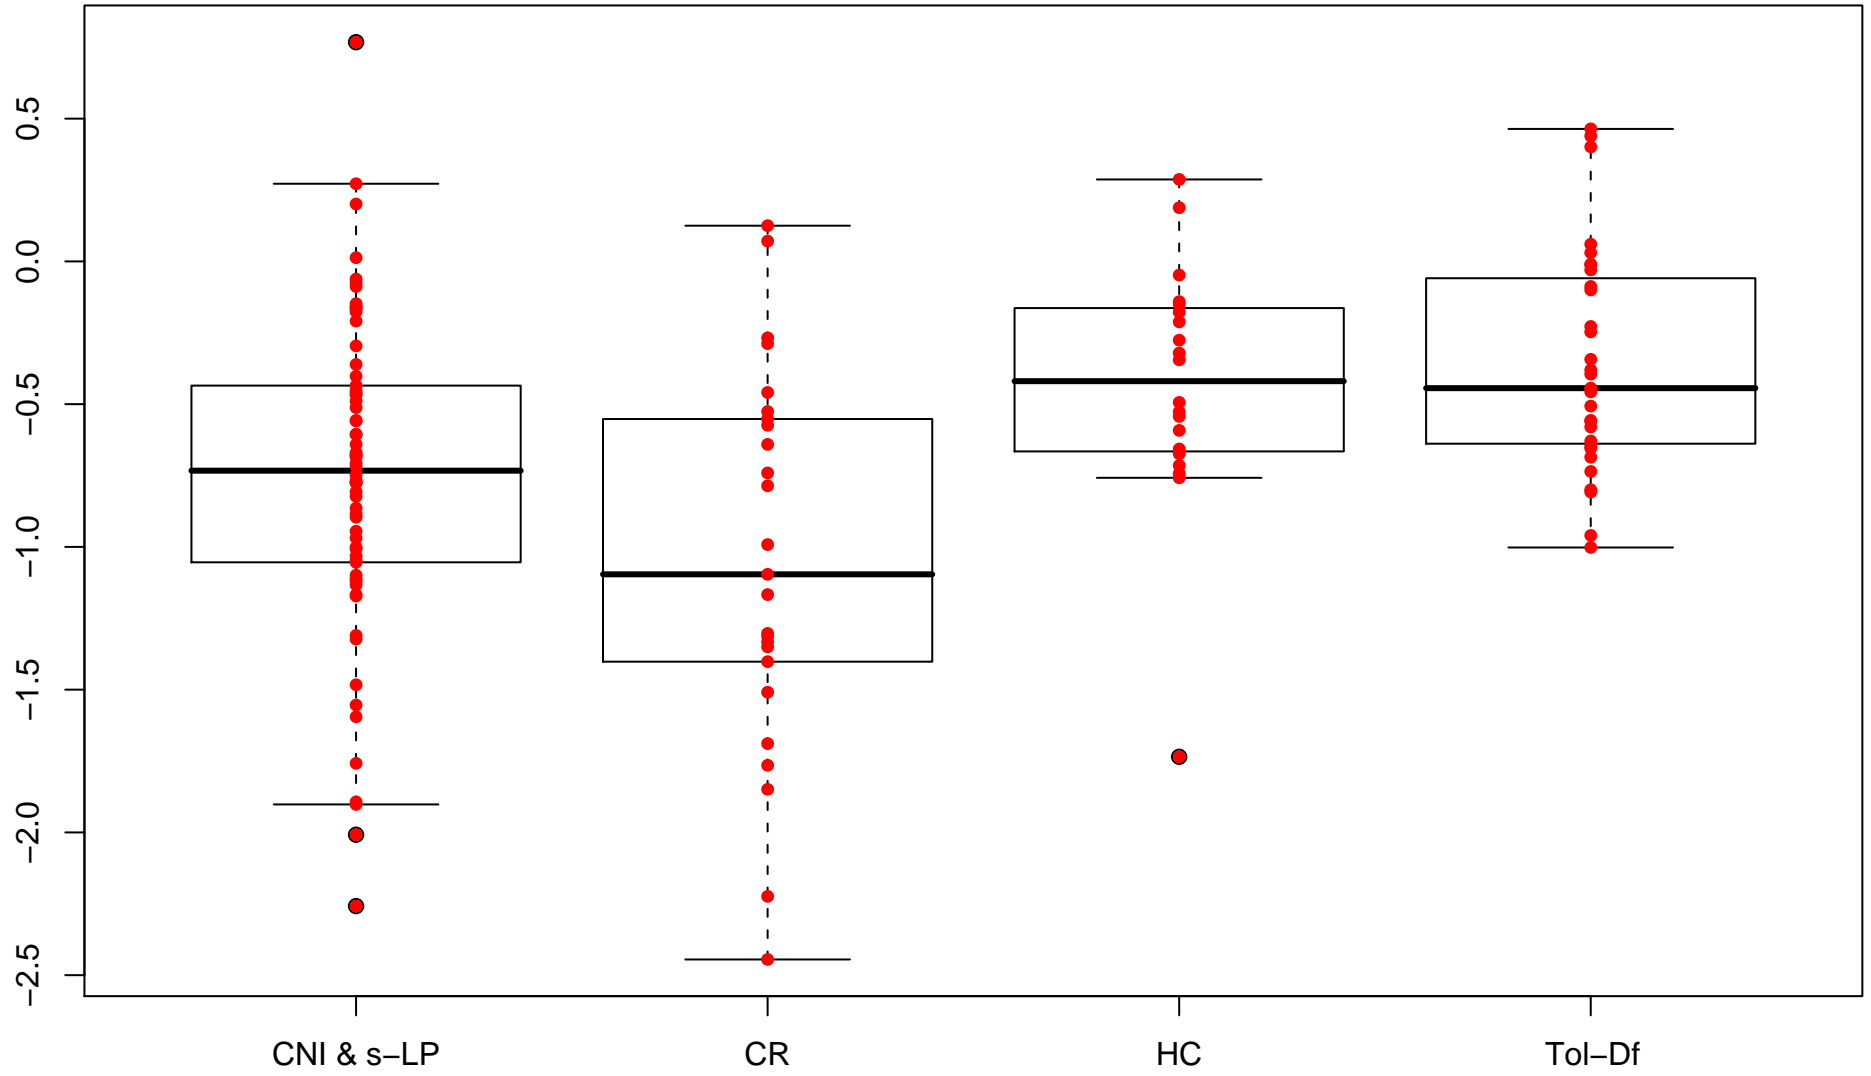

Rank 275 : CD40LG  
2.3594e-05

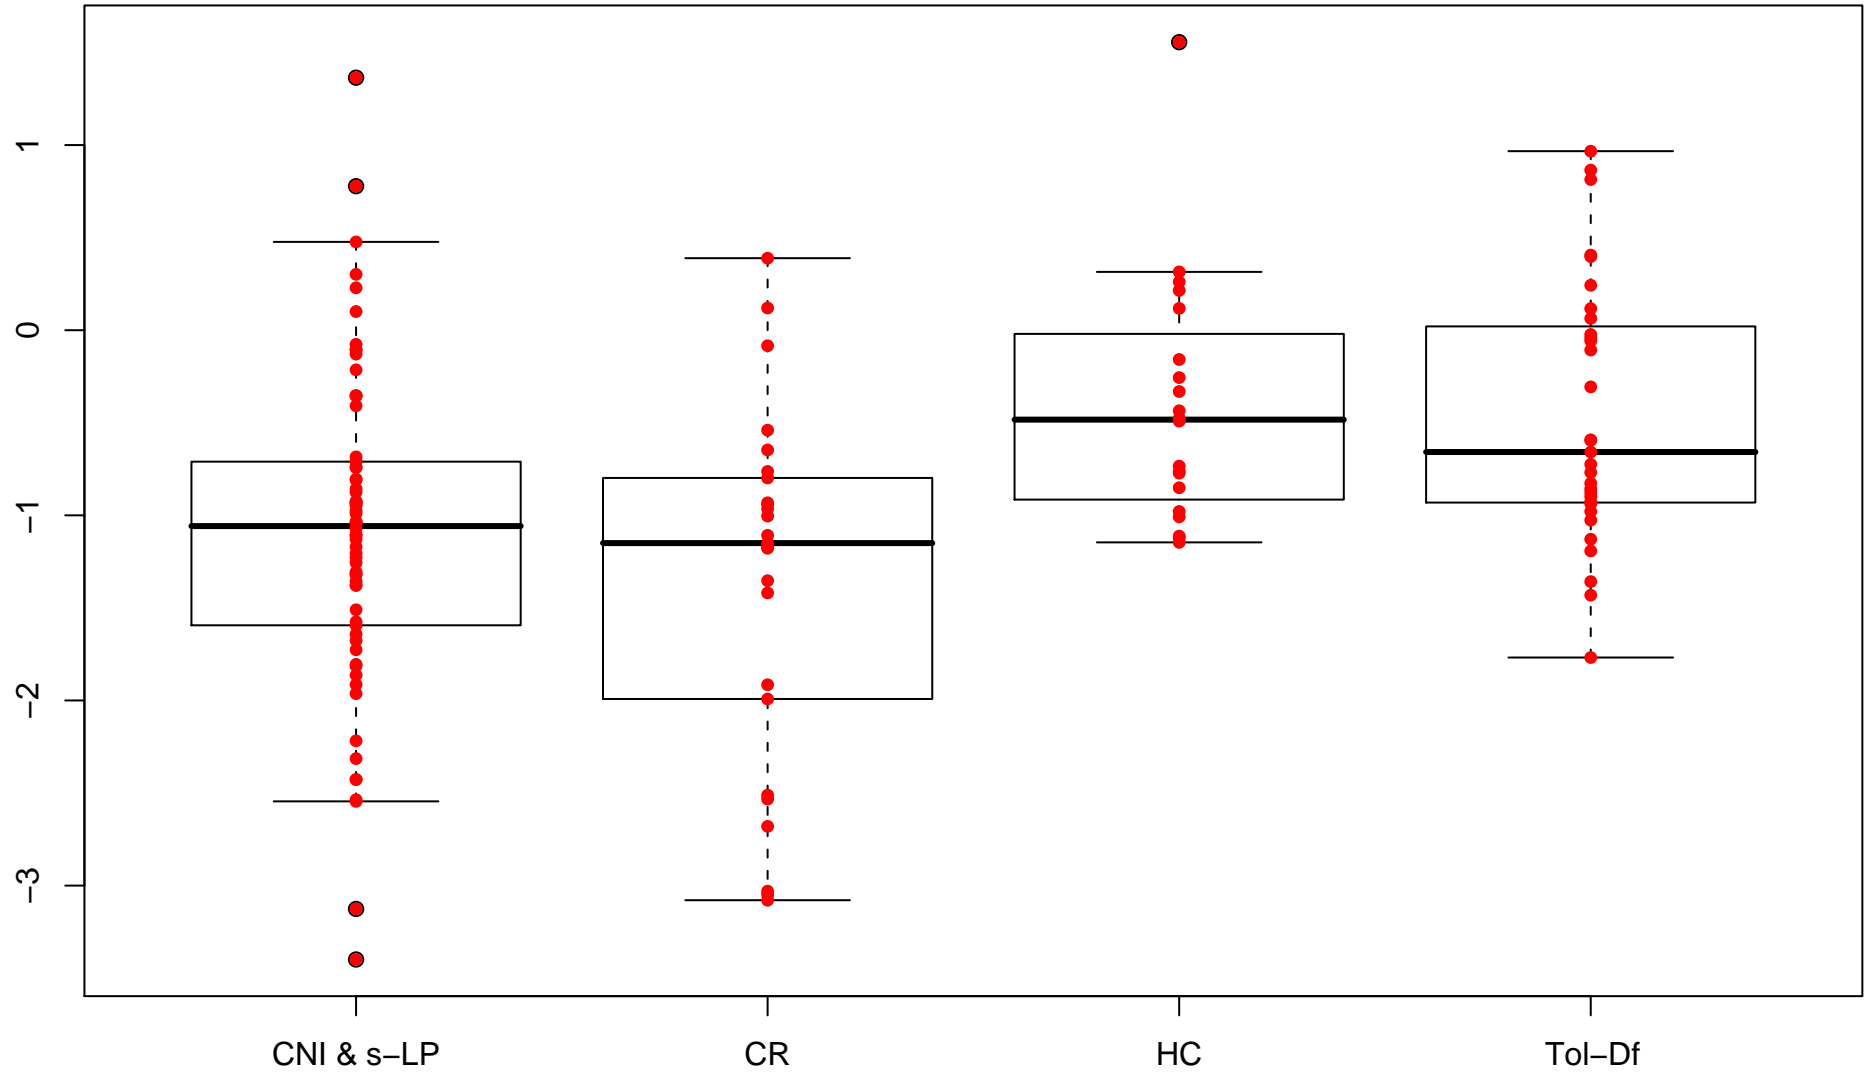

Rank 276 : TACSTD2  
2.3595e-05

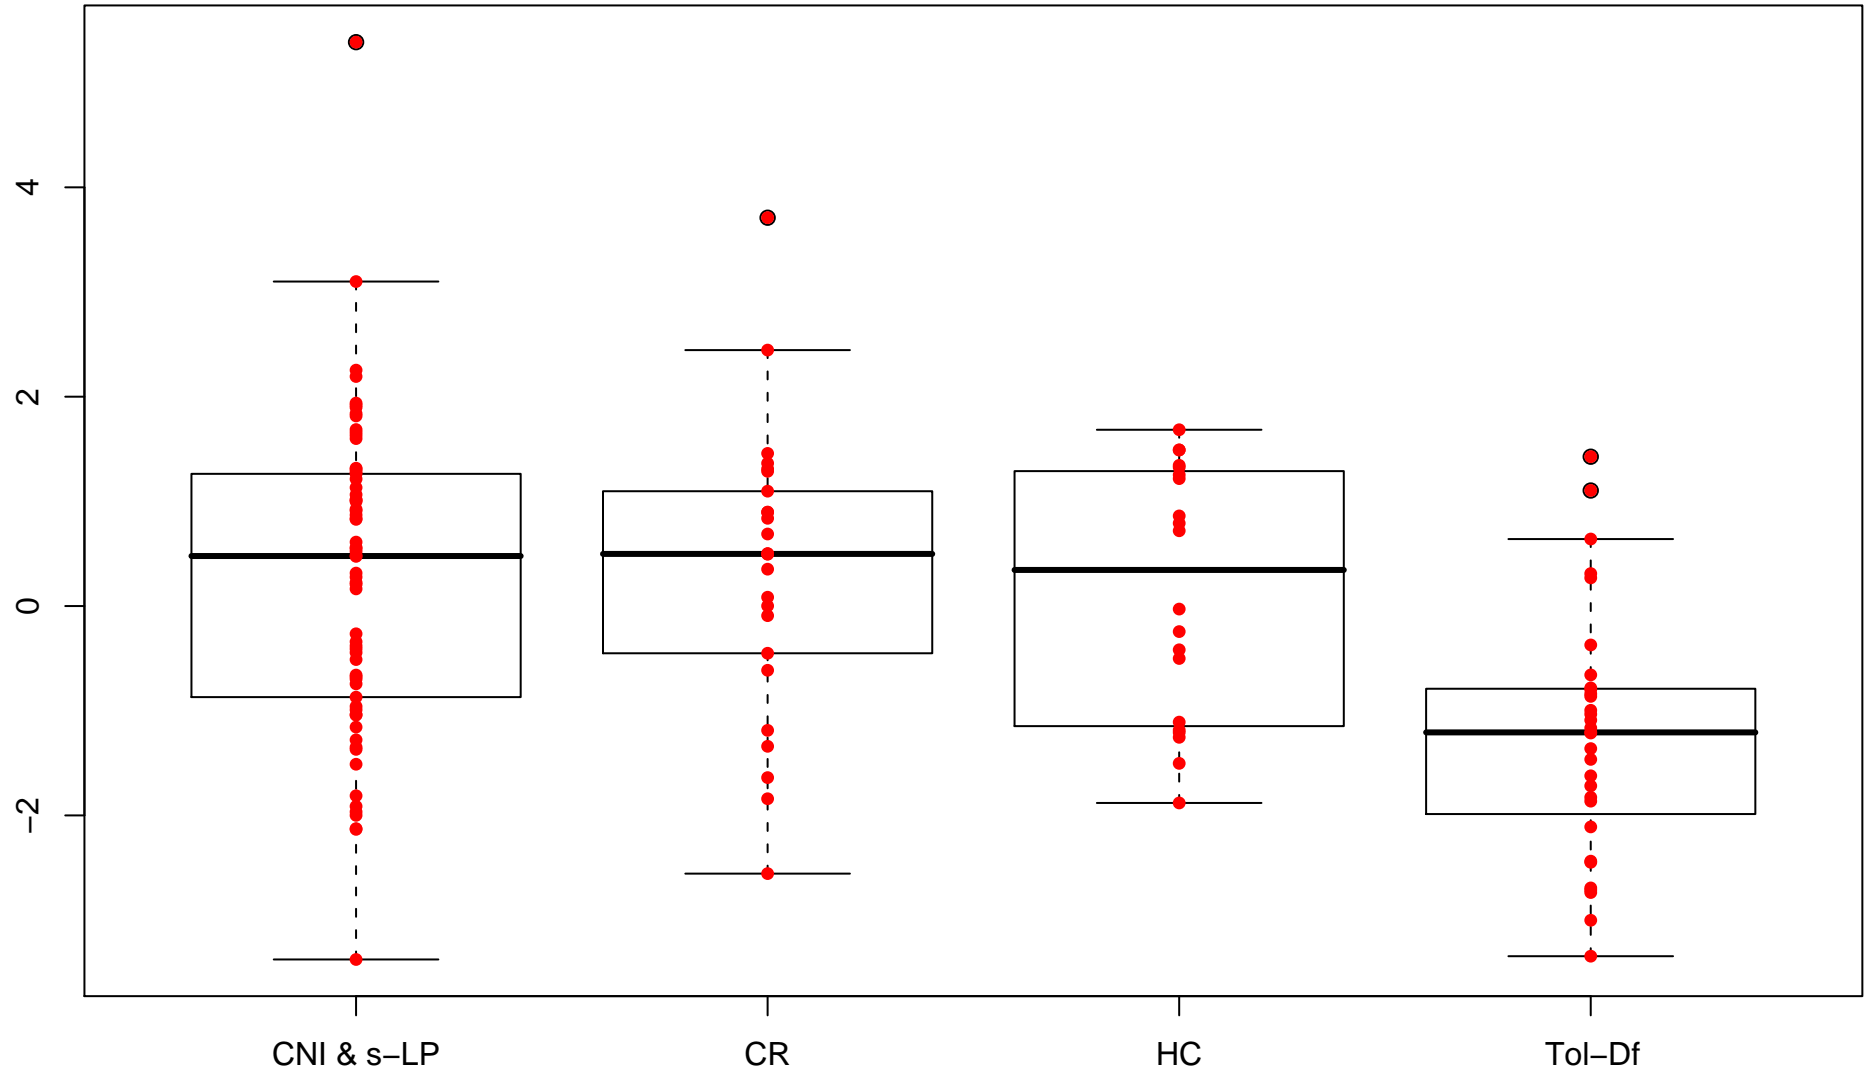

Rank 277 : KLF7  
2.3807e-05

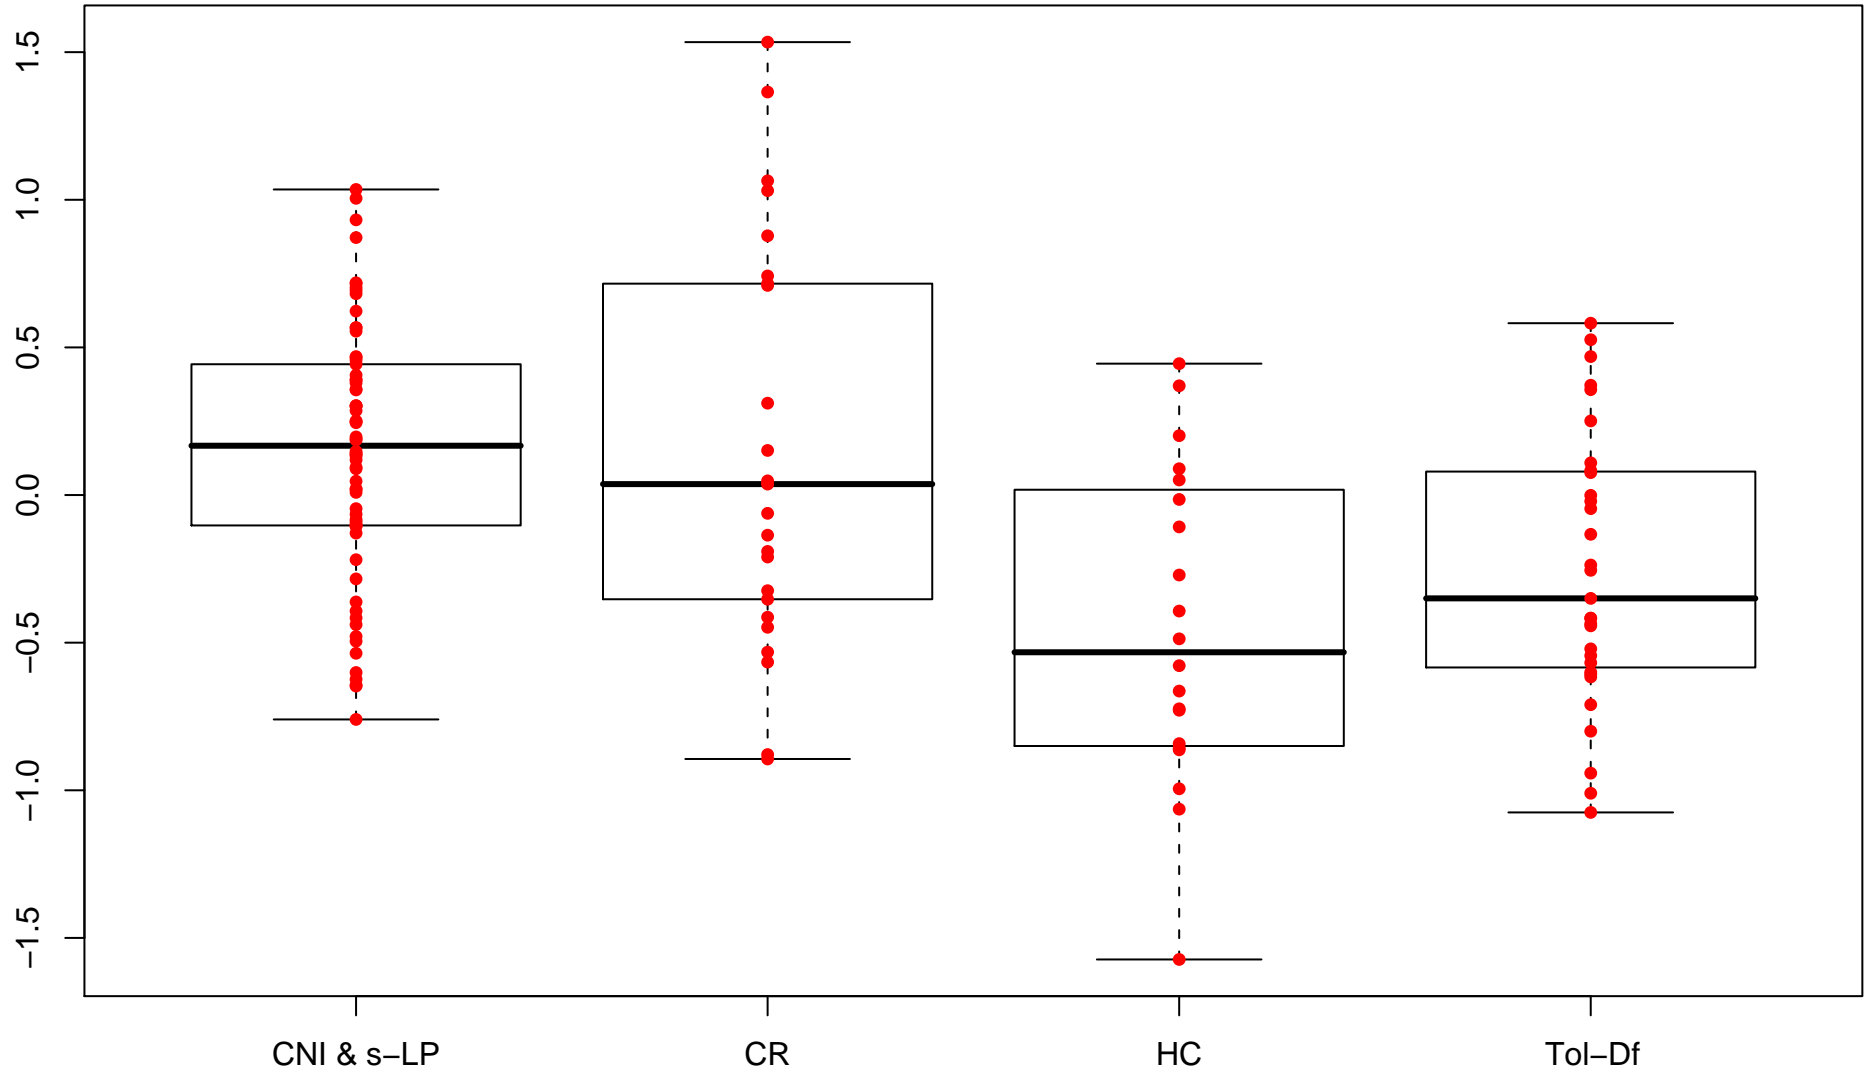

Rank 278 : THC2317292  
2.3938e-05

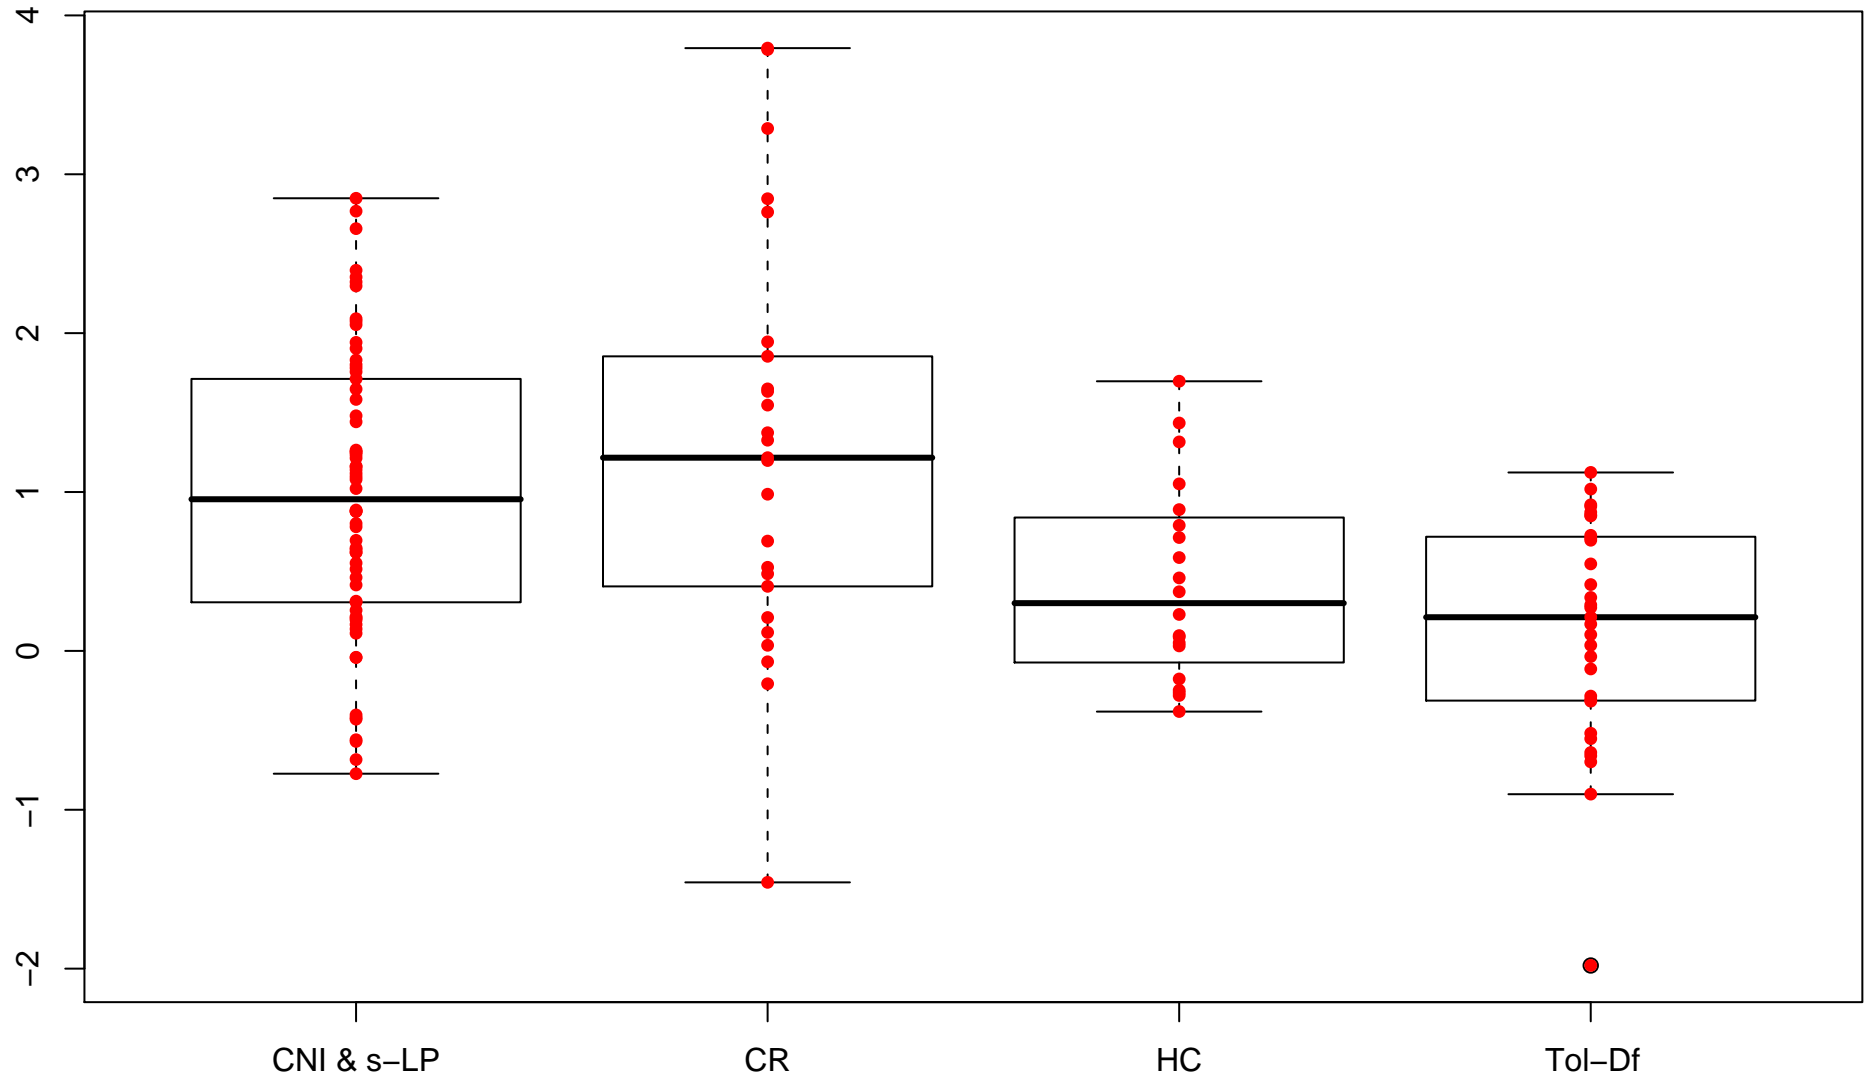

Rank 279 : FCER1G  
2.4568e-05

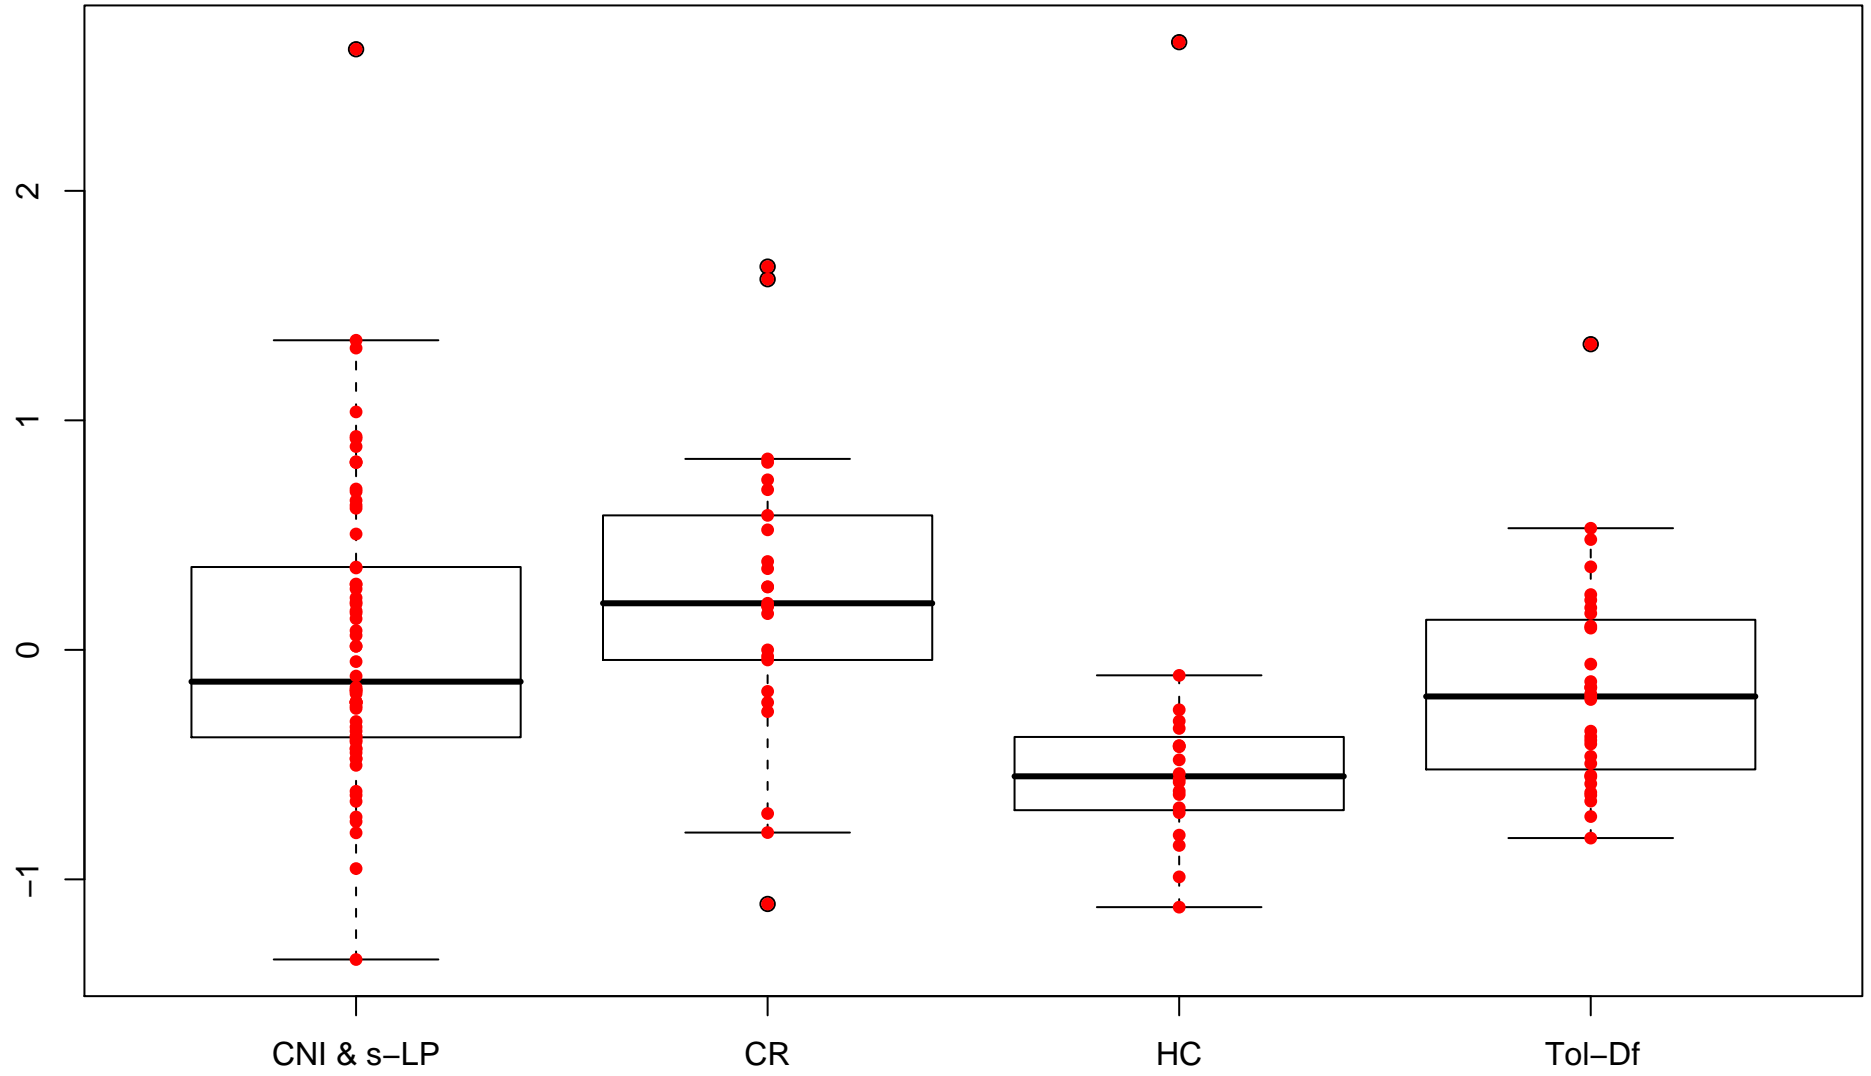



Rank 280 : SNHG5  
2.457e-05

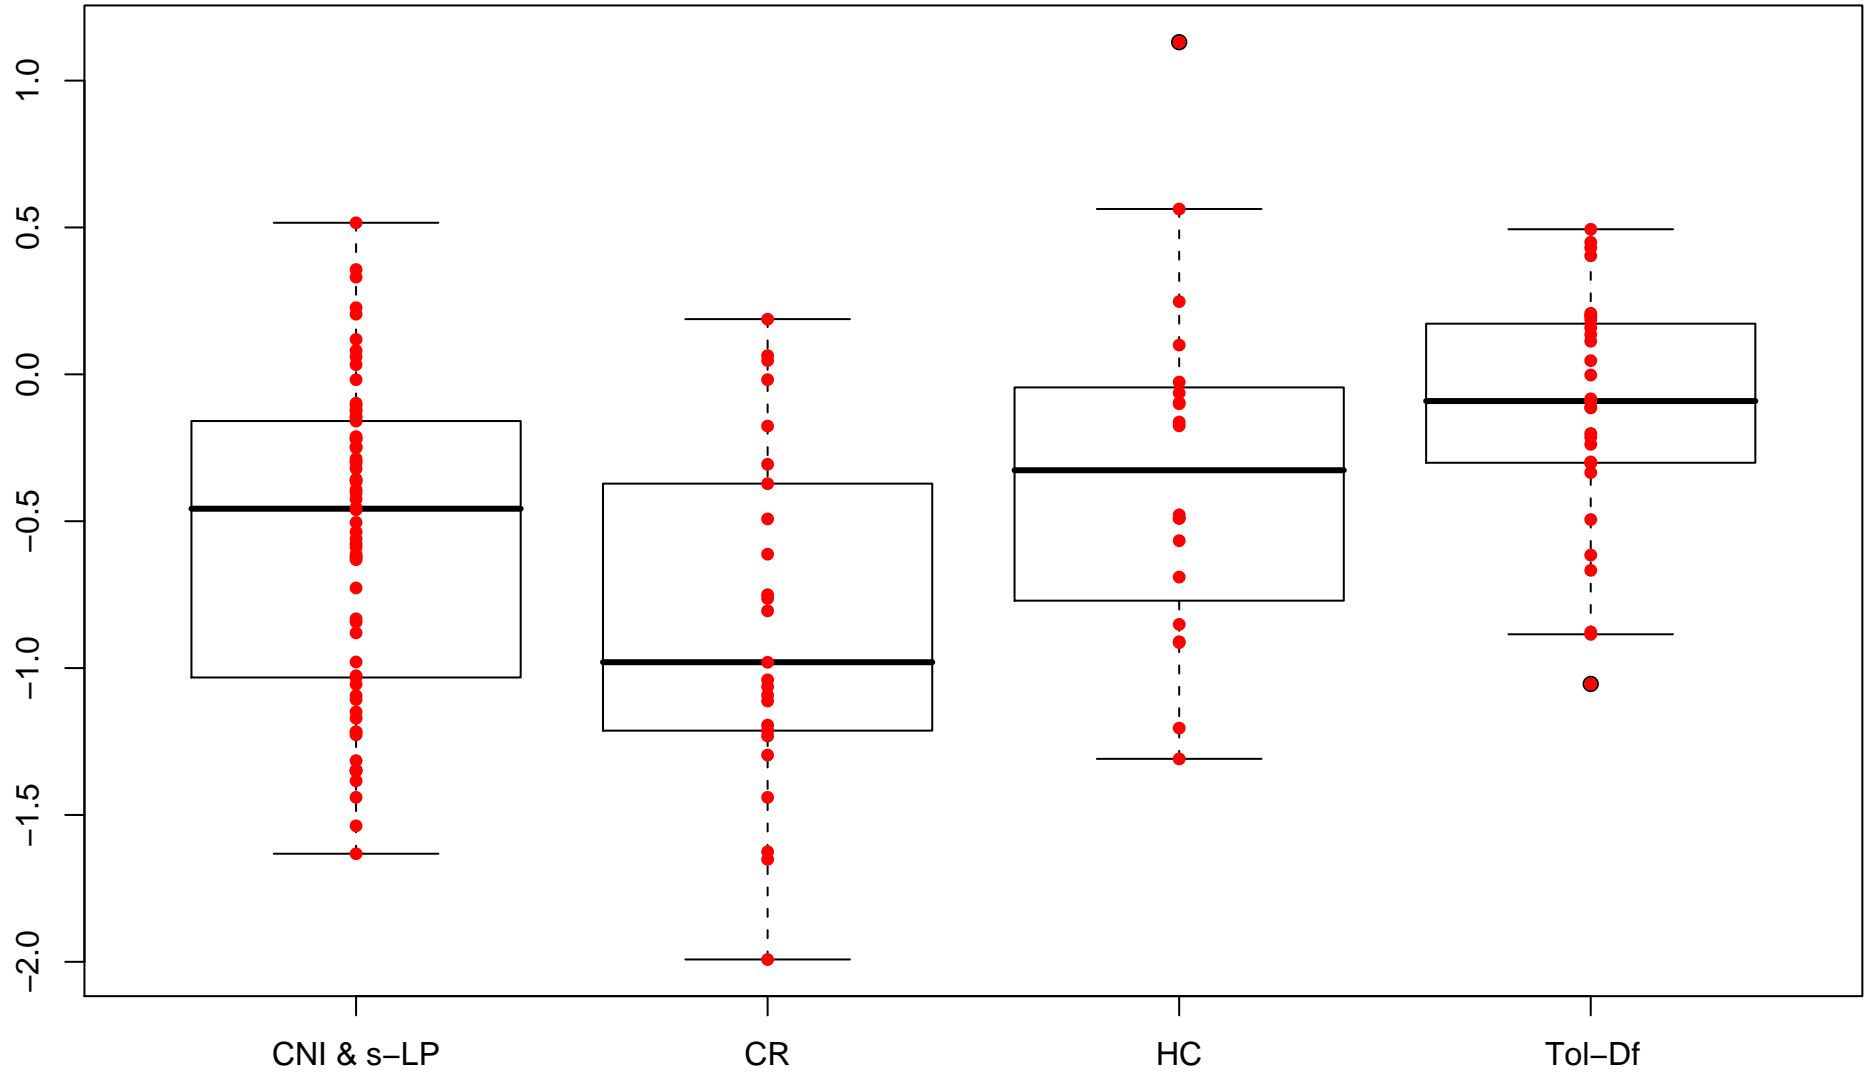

Rank 281 : CTSF  
2.505e-05

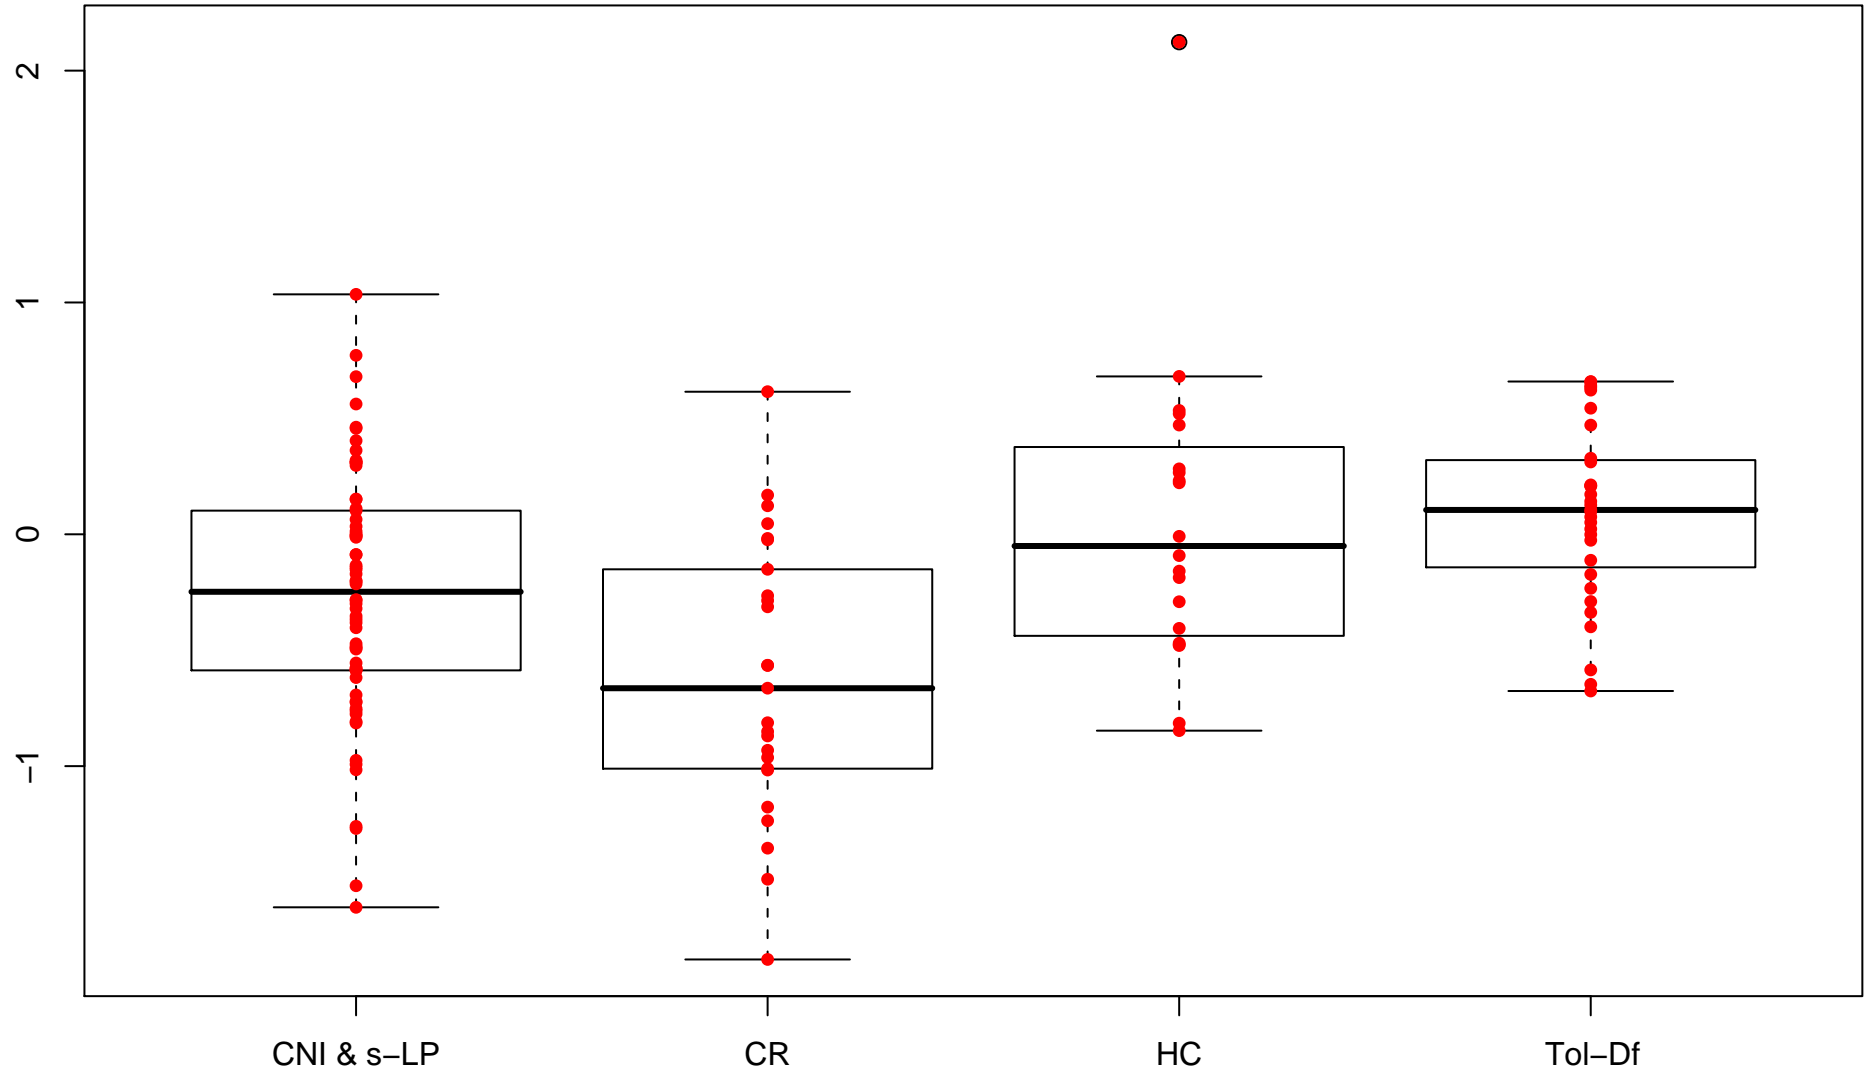

Rank 282 : UPF3A  
2.5086e-05

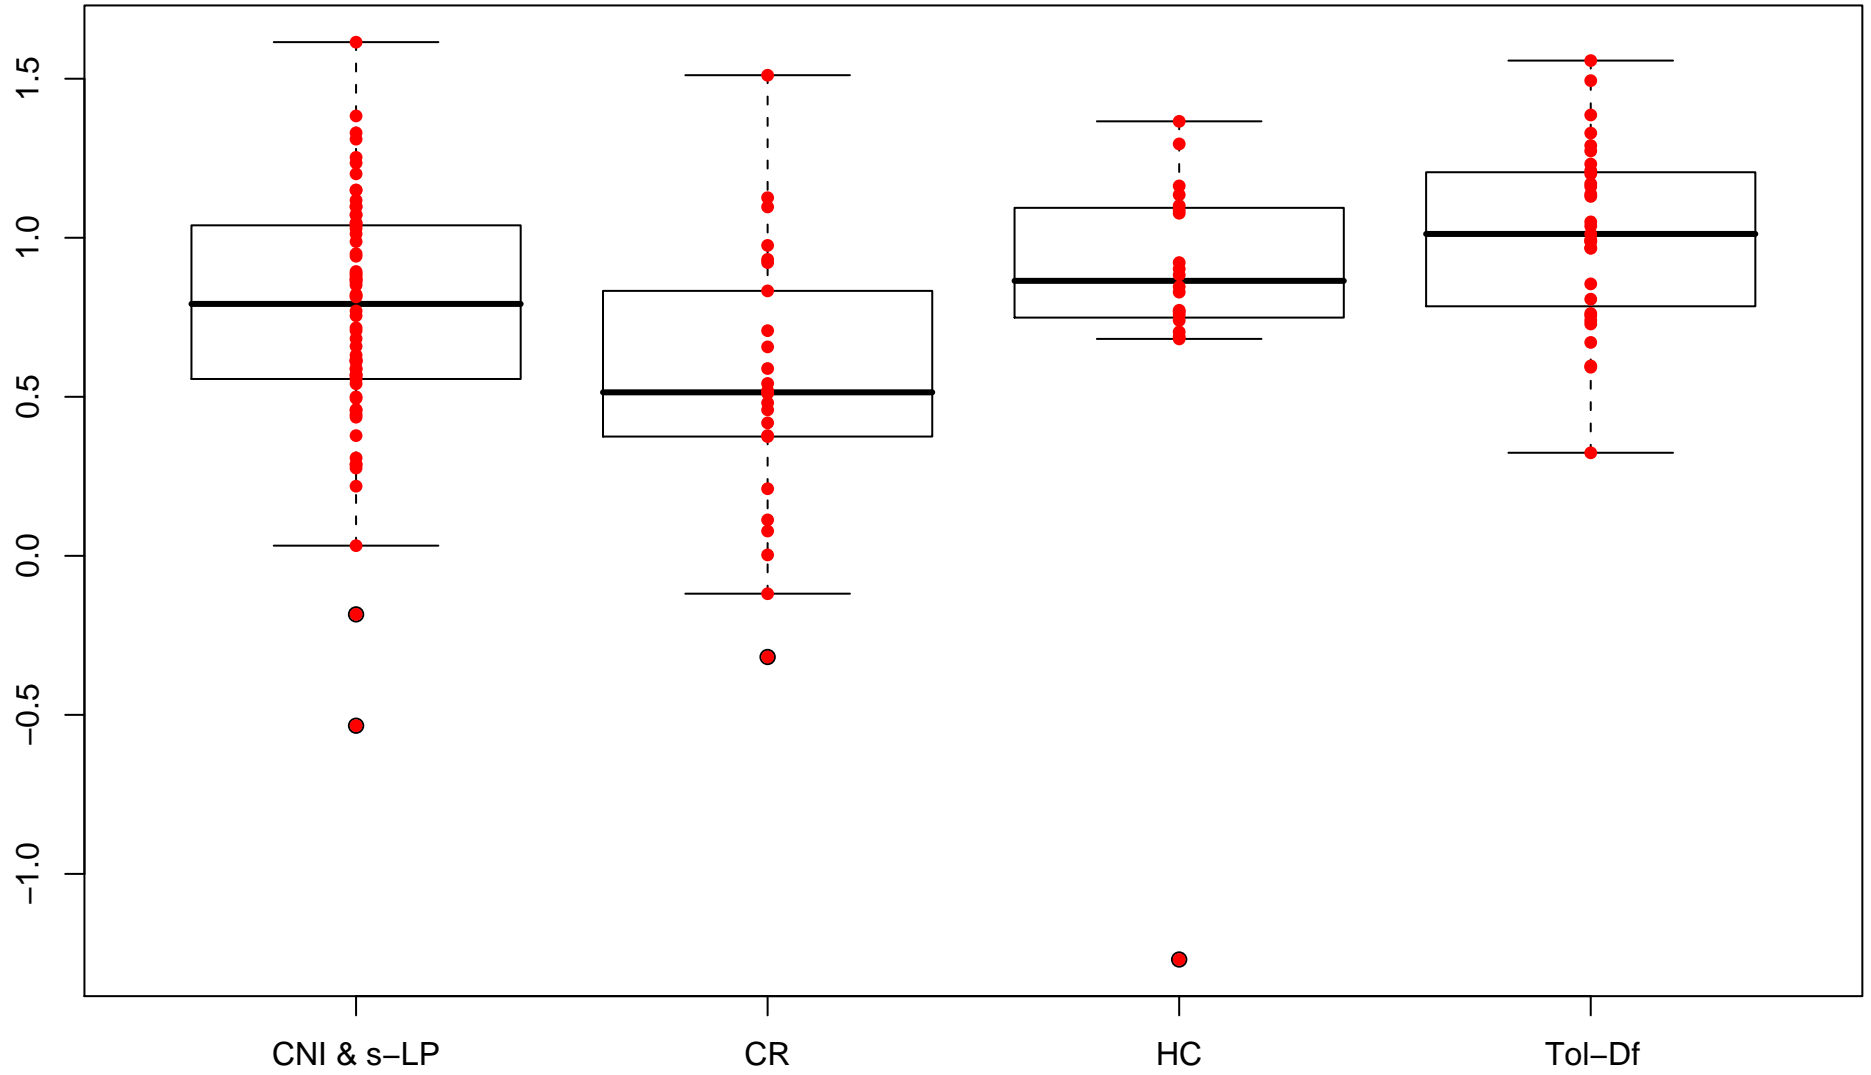

Rank 283 : CD81  
2.5197e-05

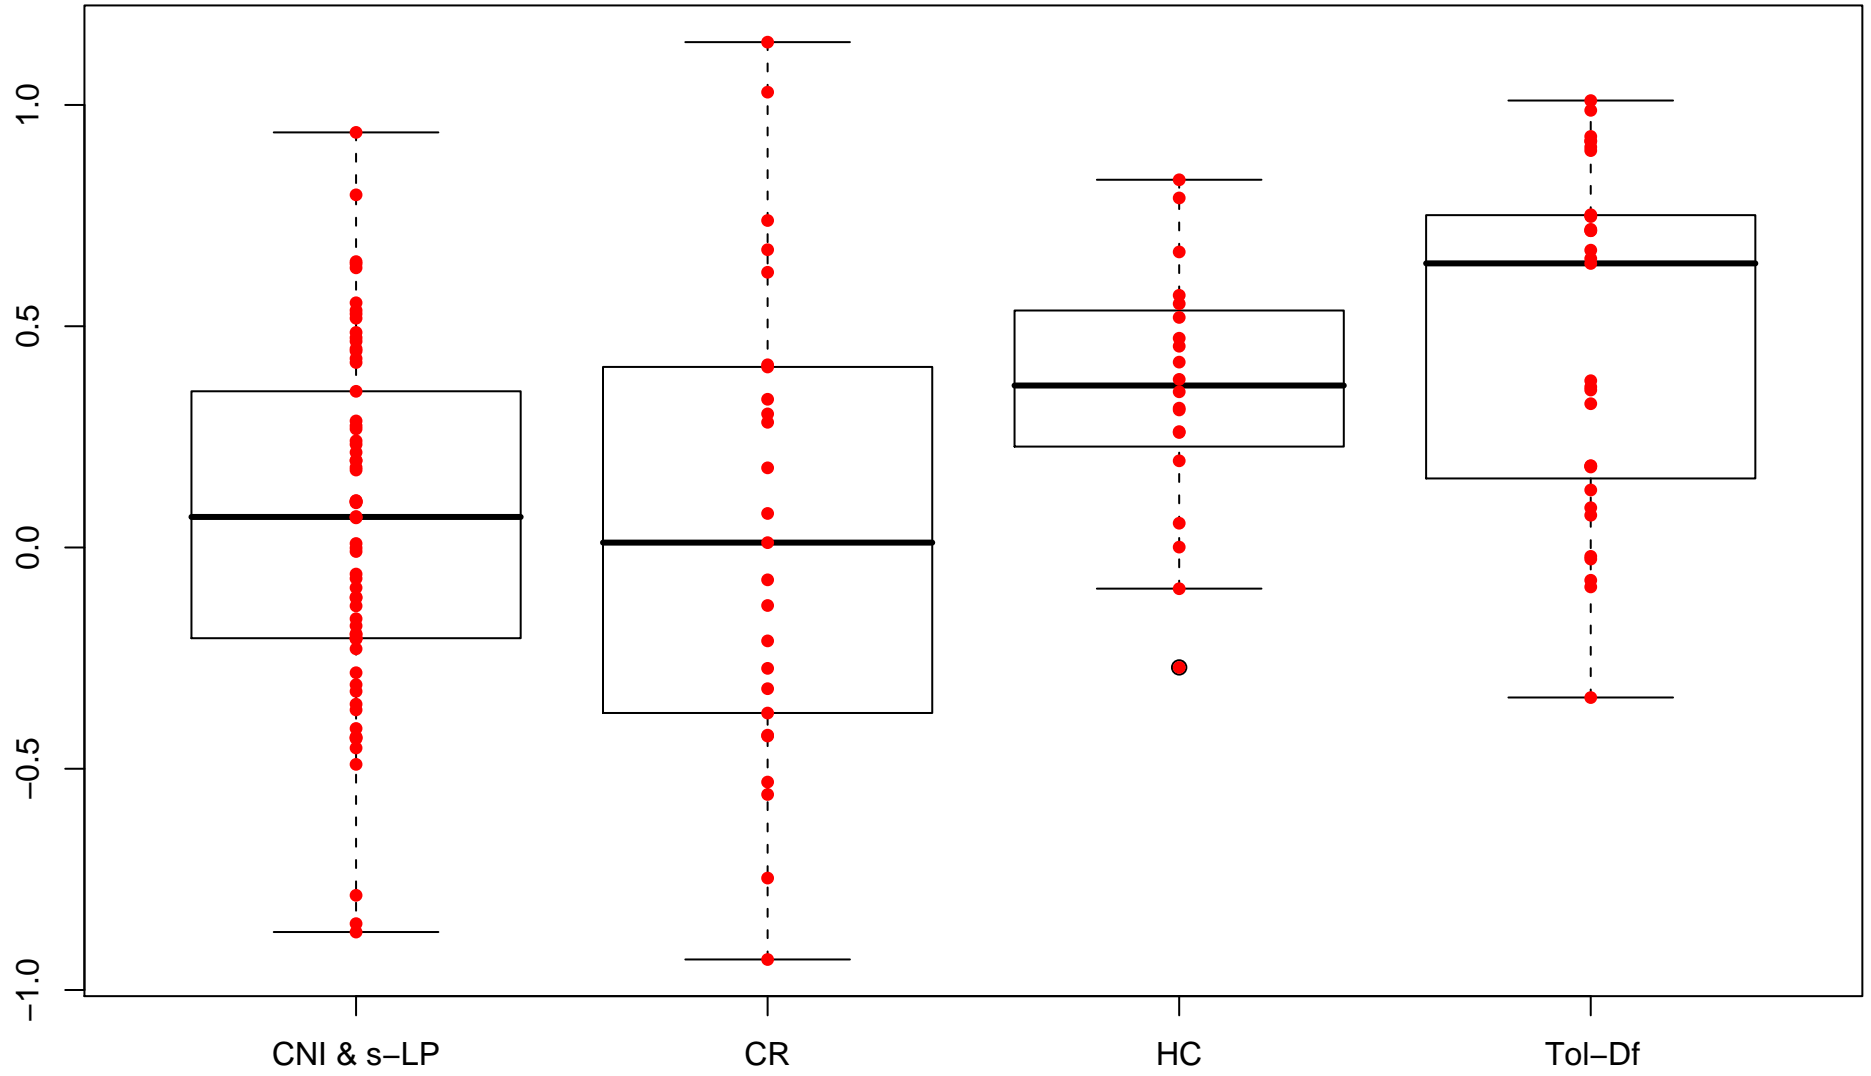

Rank 284 : CCDC88A  
2.5778e-05

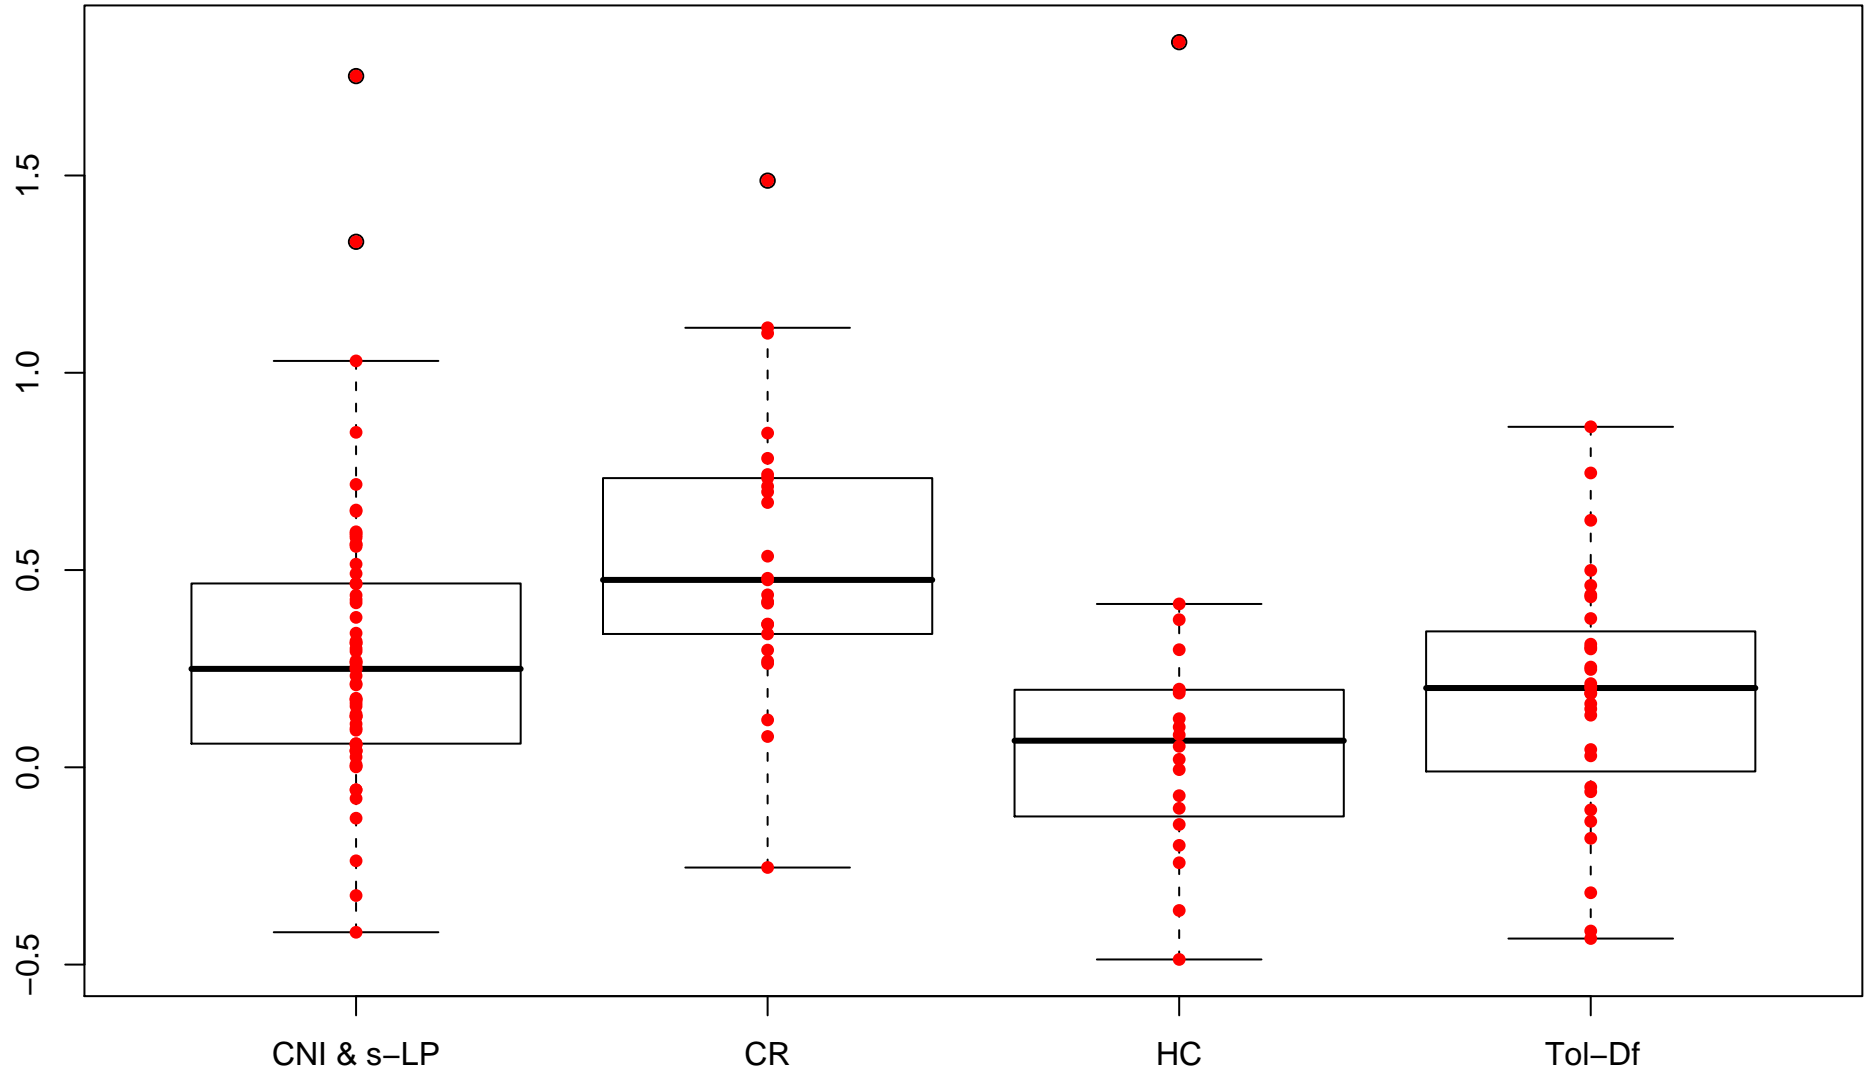

Rank 285 : DAD1  
2.5965e-05

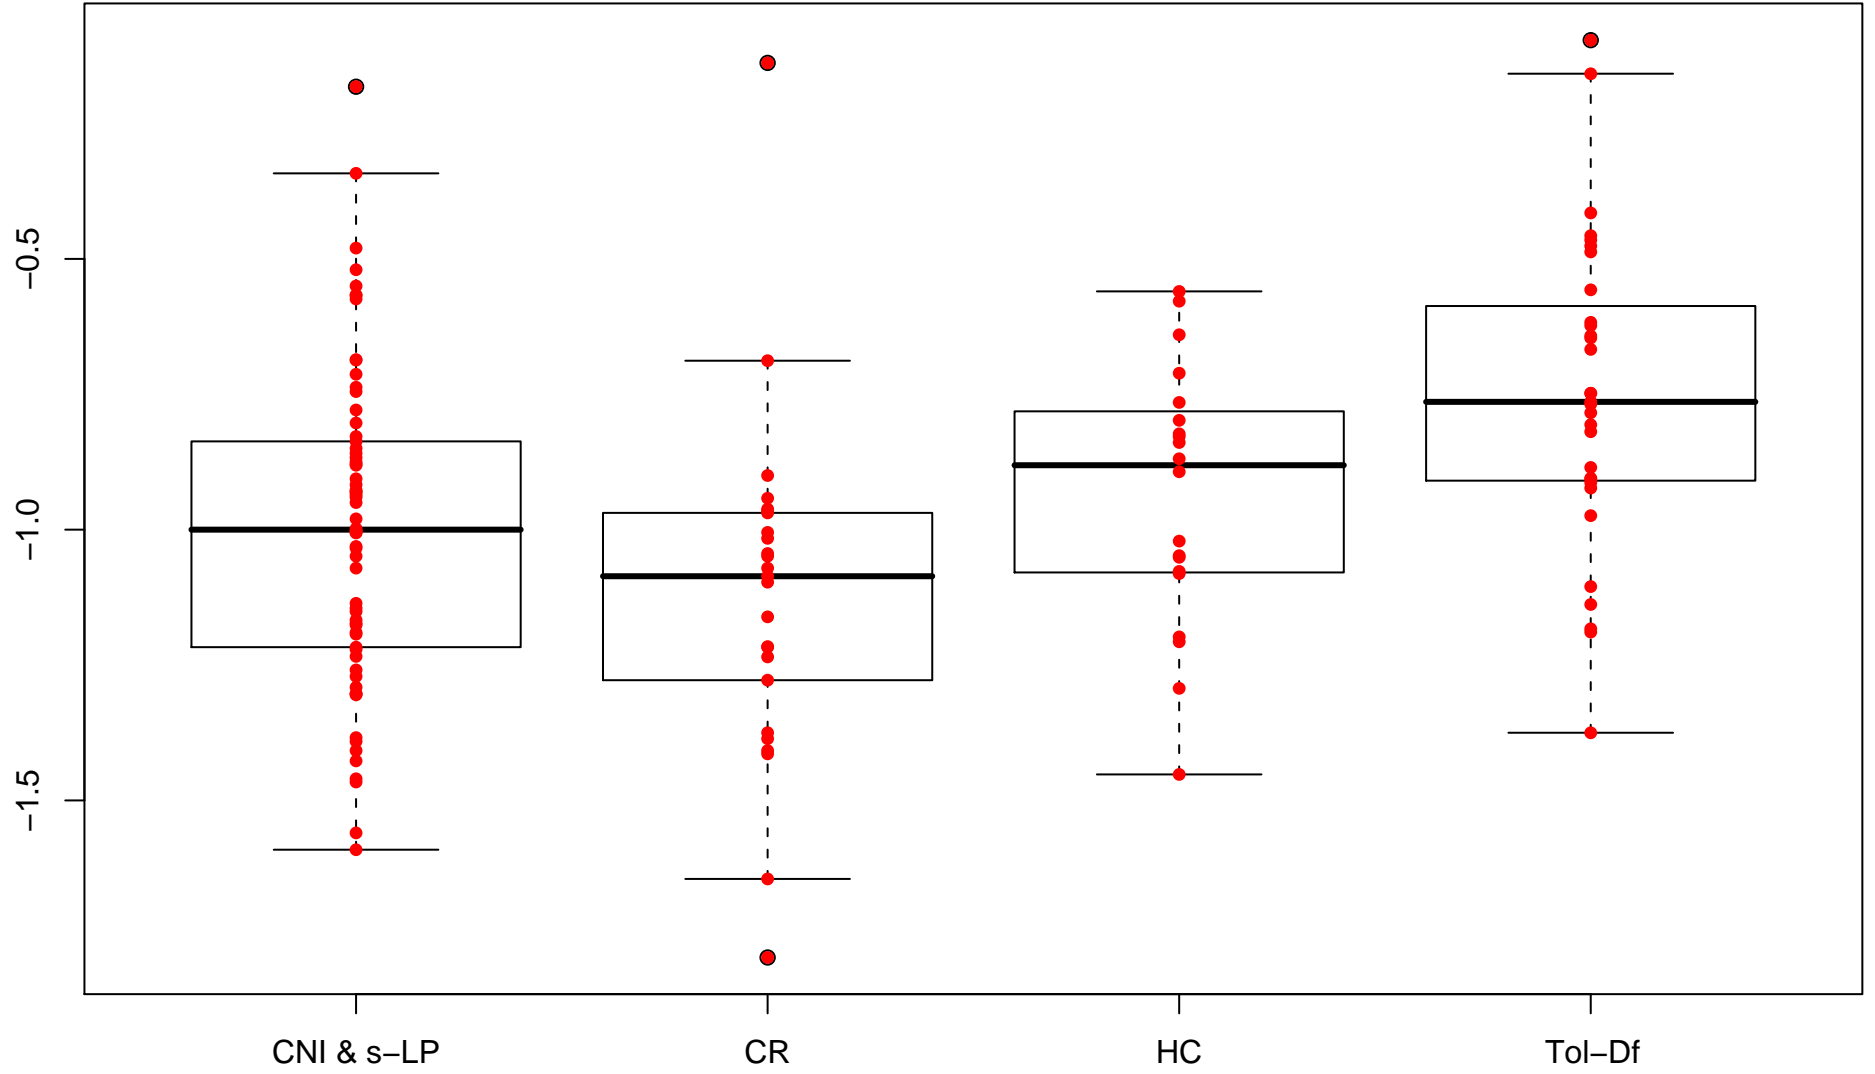

Rank 286 : EIF3E  
2.597e-05

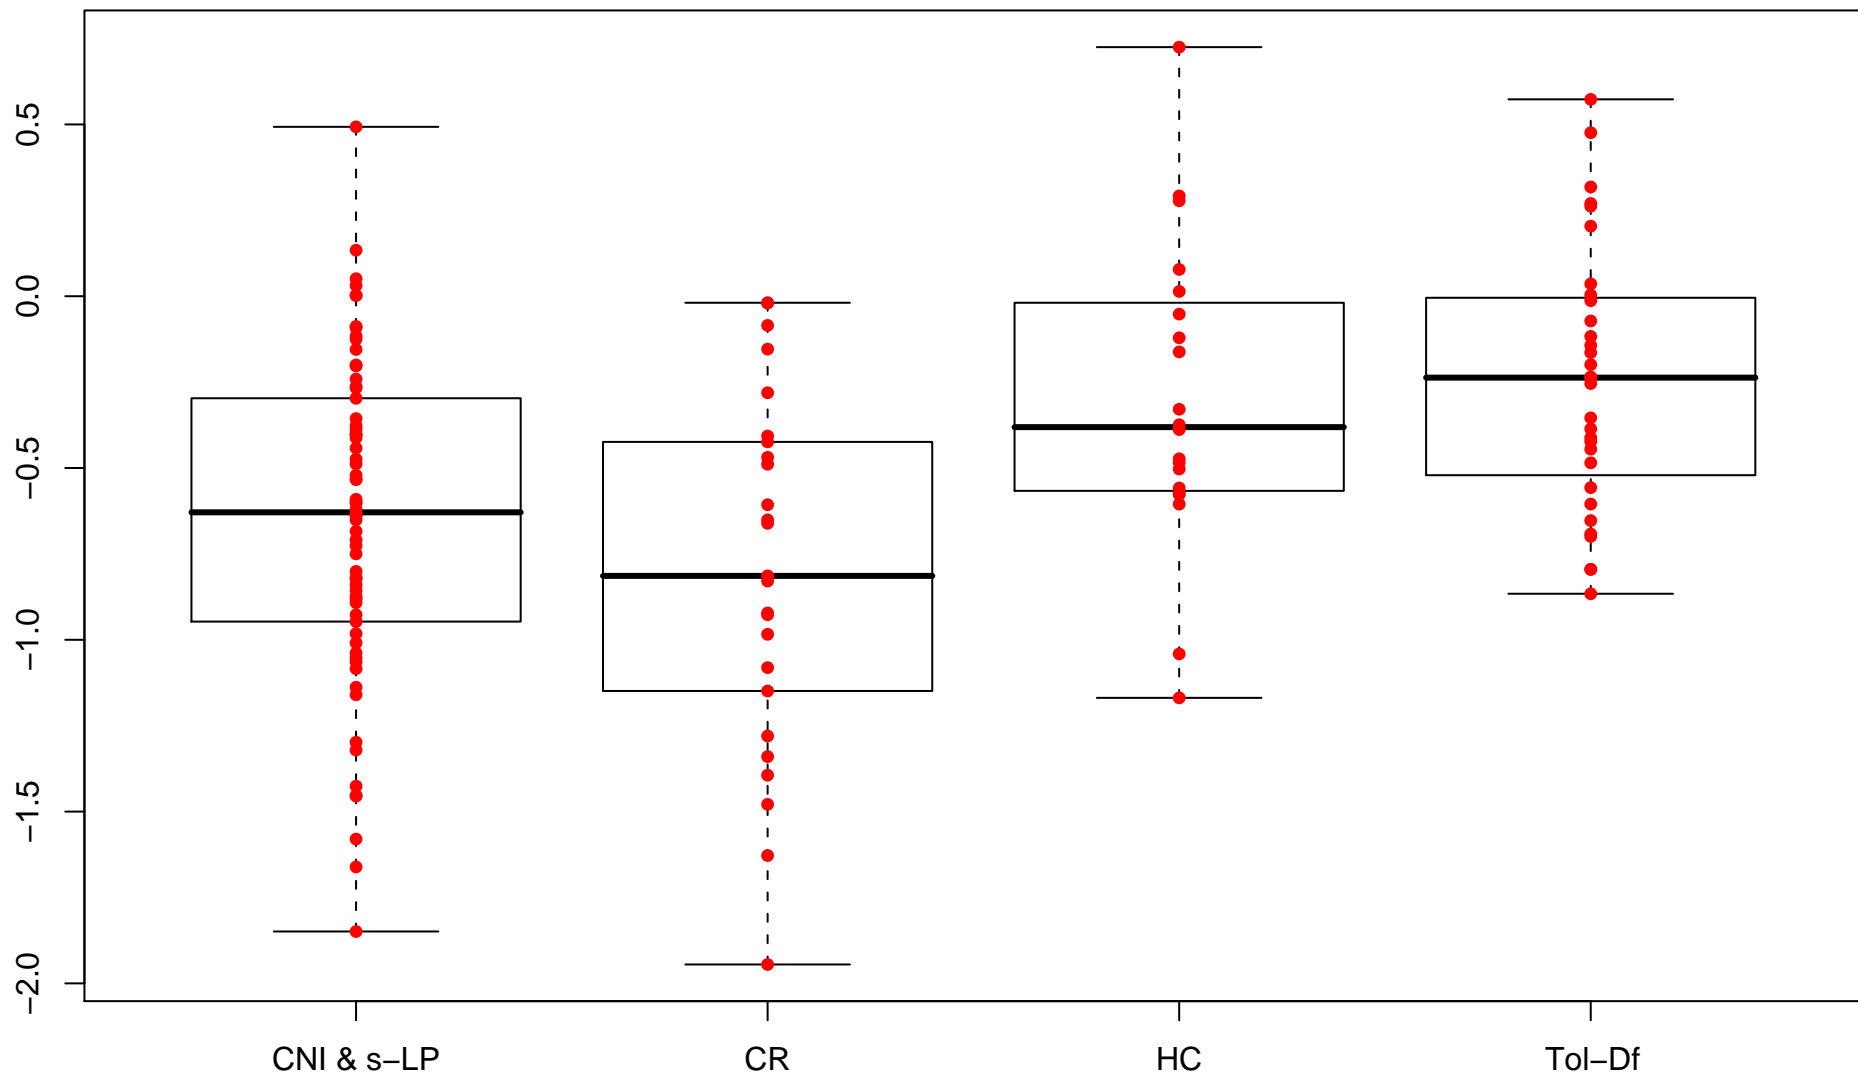

Rank 287 : RPL14  
2.6548e-05

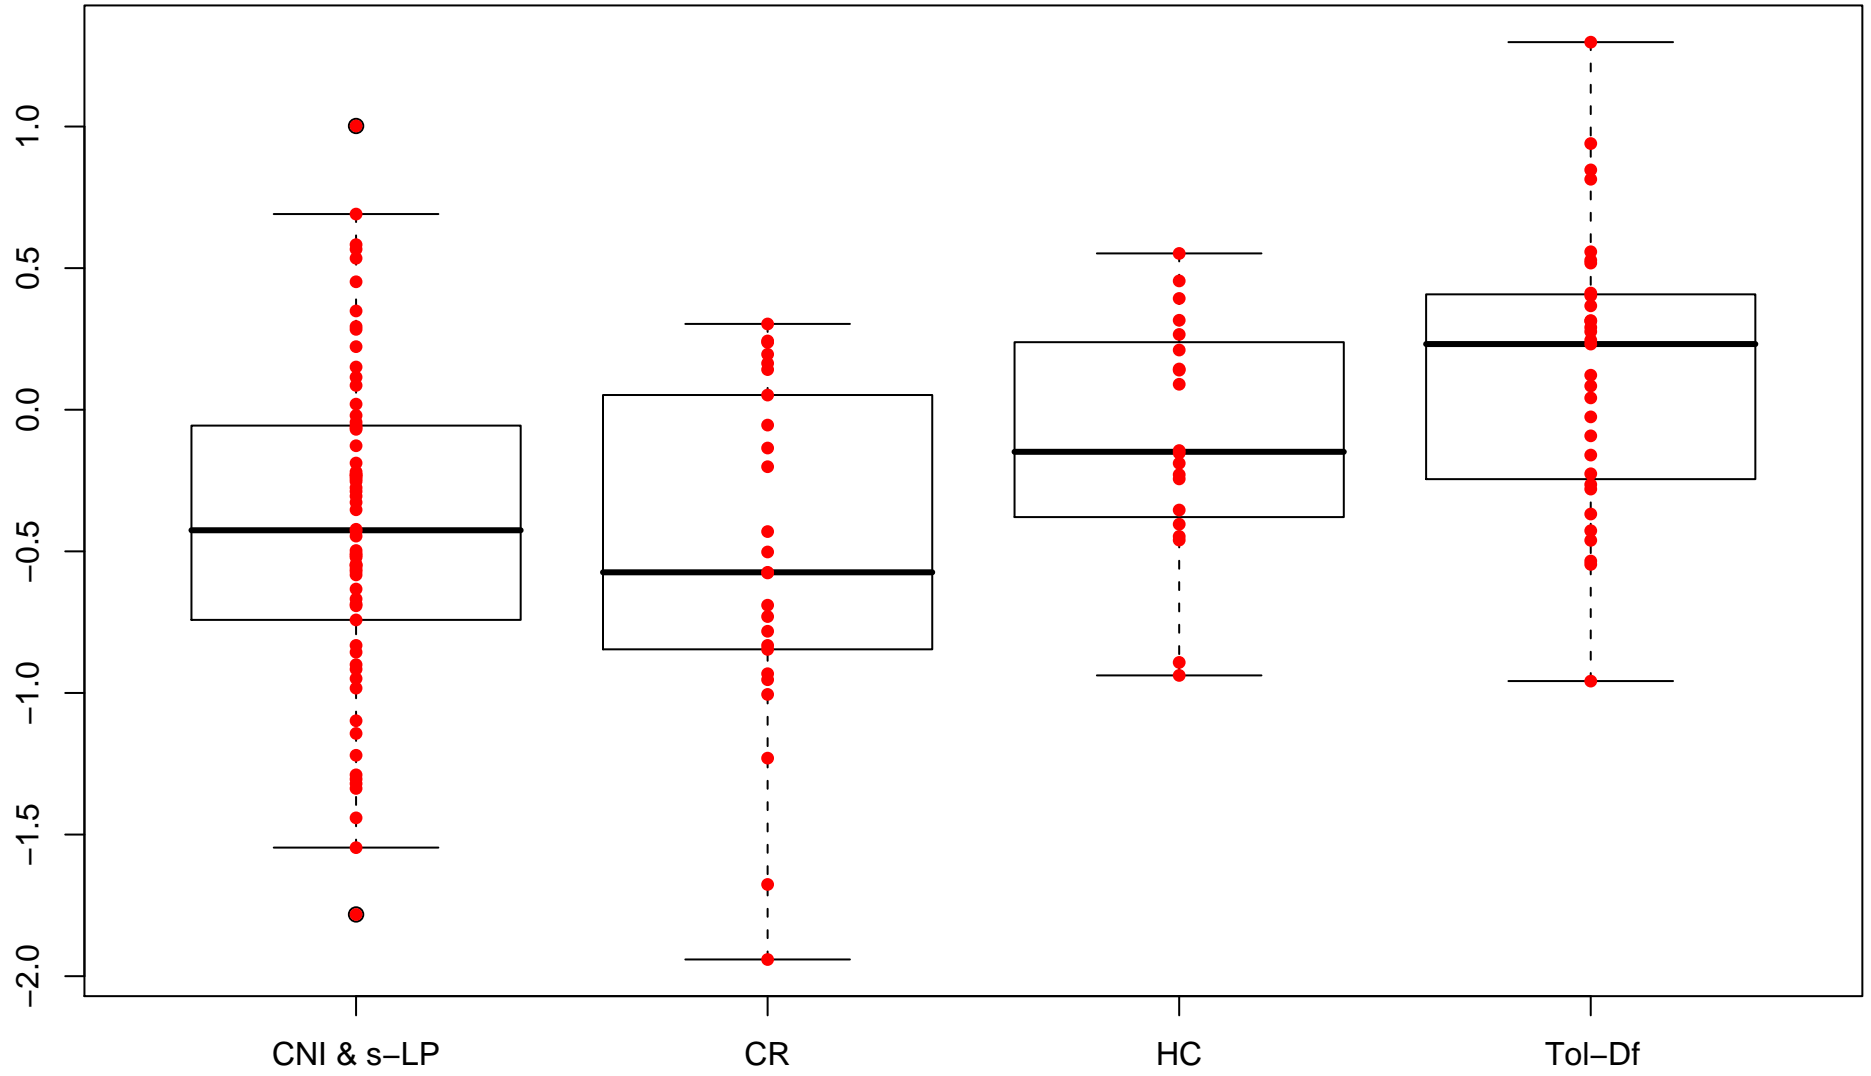



Rank 288 : HS3ST3B1  
2.6767e-05

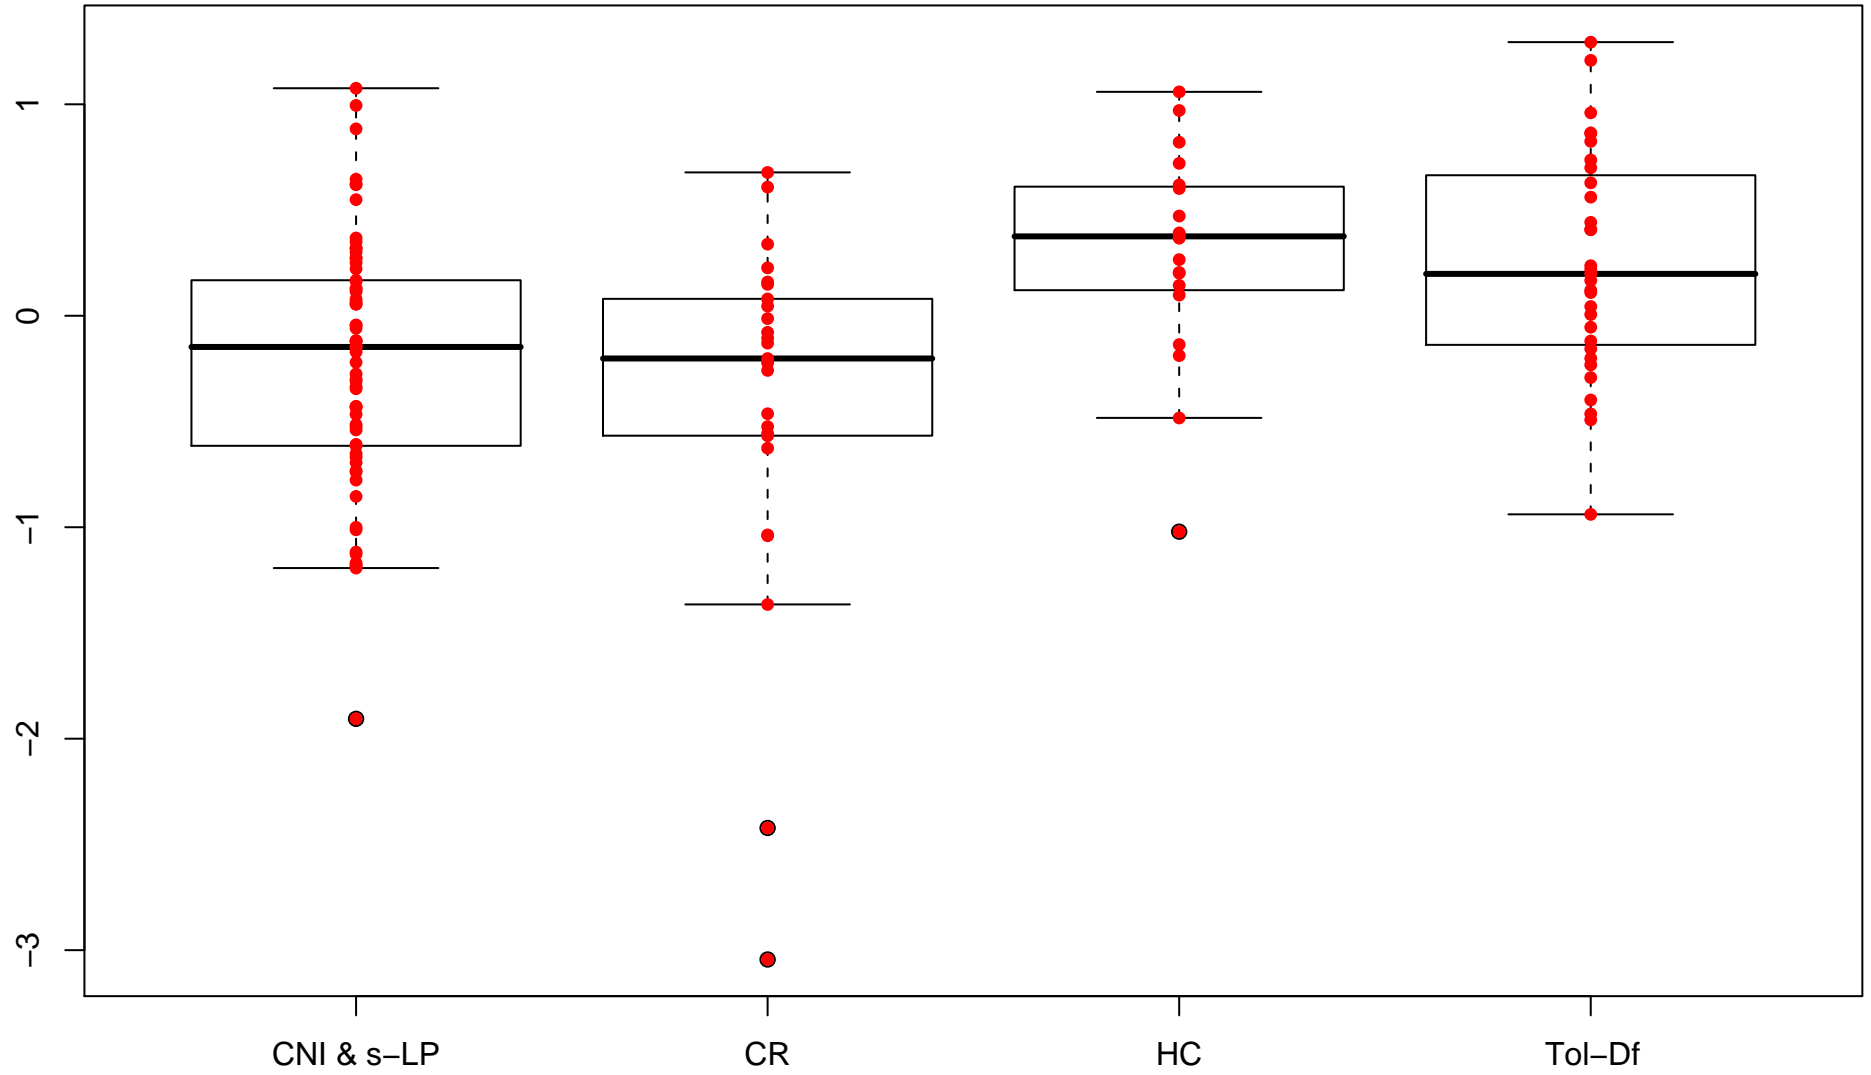

Rank 289 : ANKFY1  
2.6801e-05

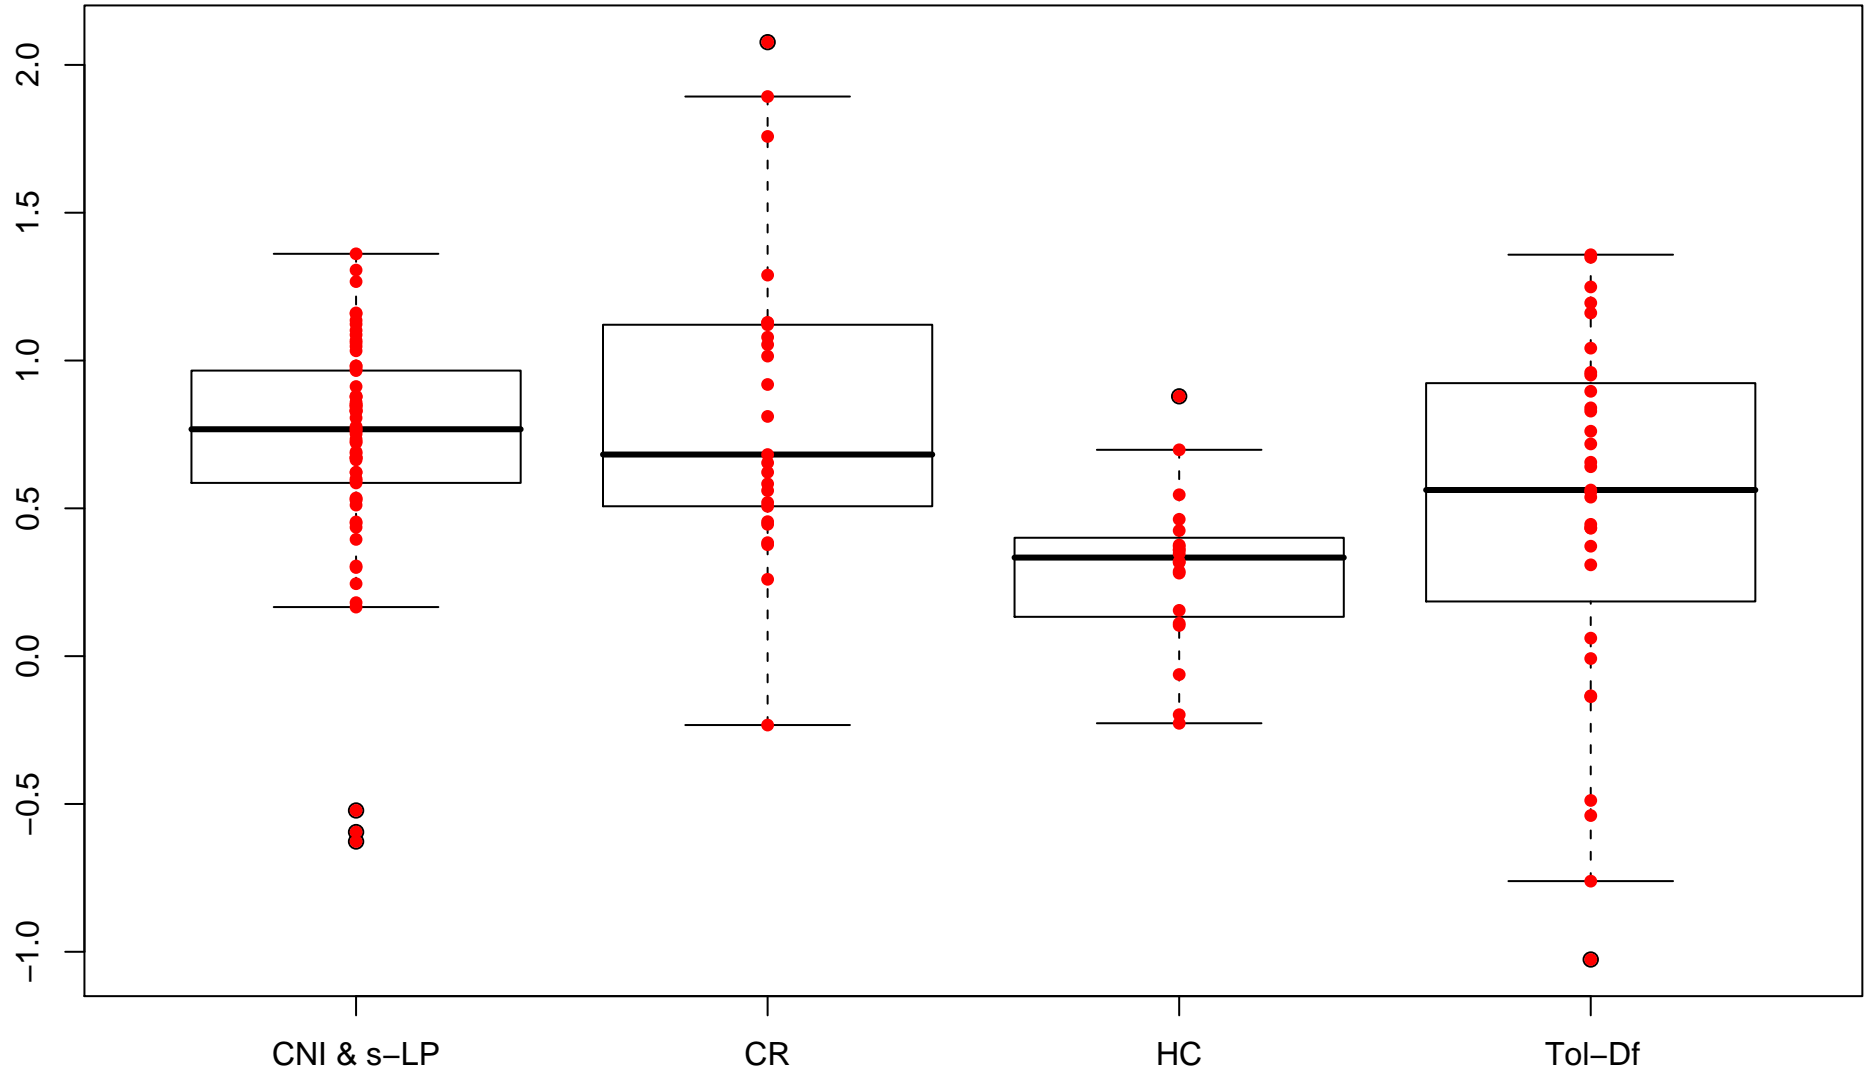

Rank 290 : LYPD1  
2.7023e-05

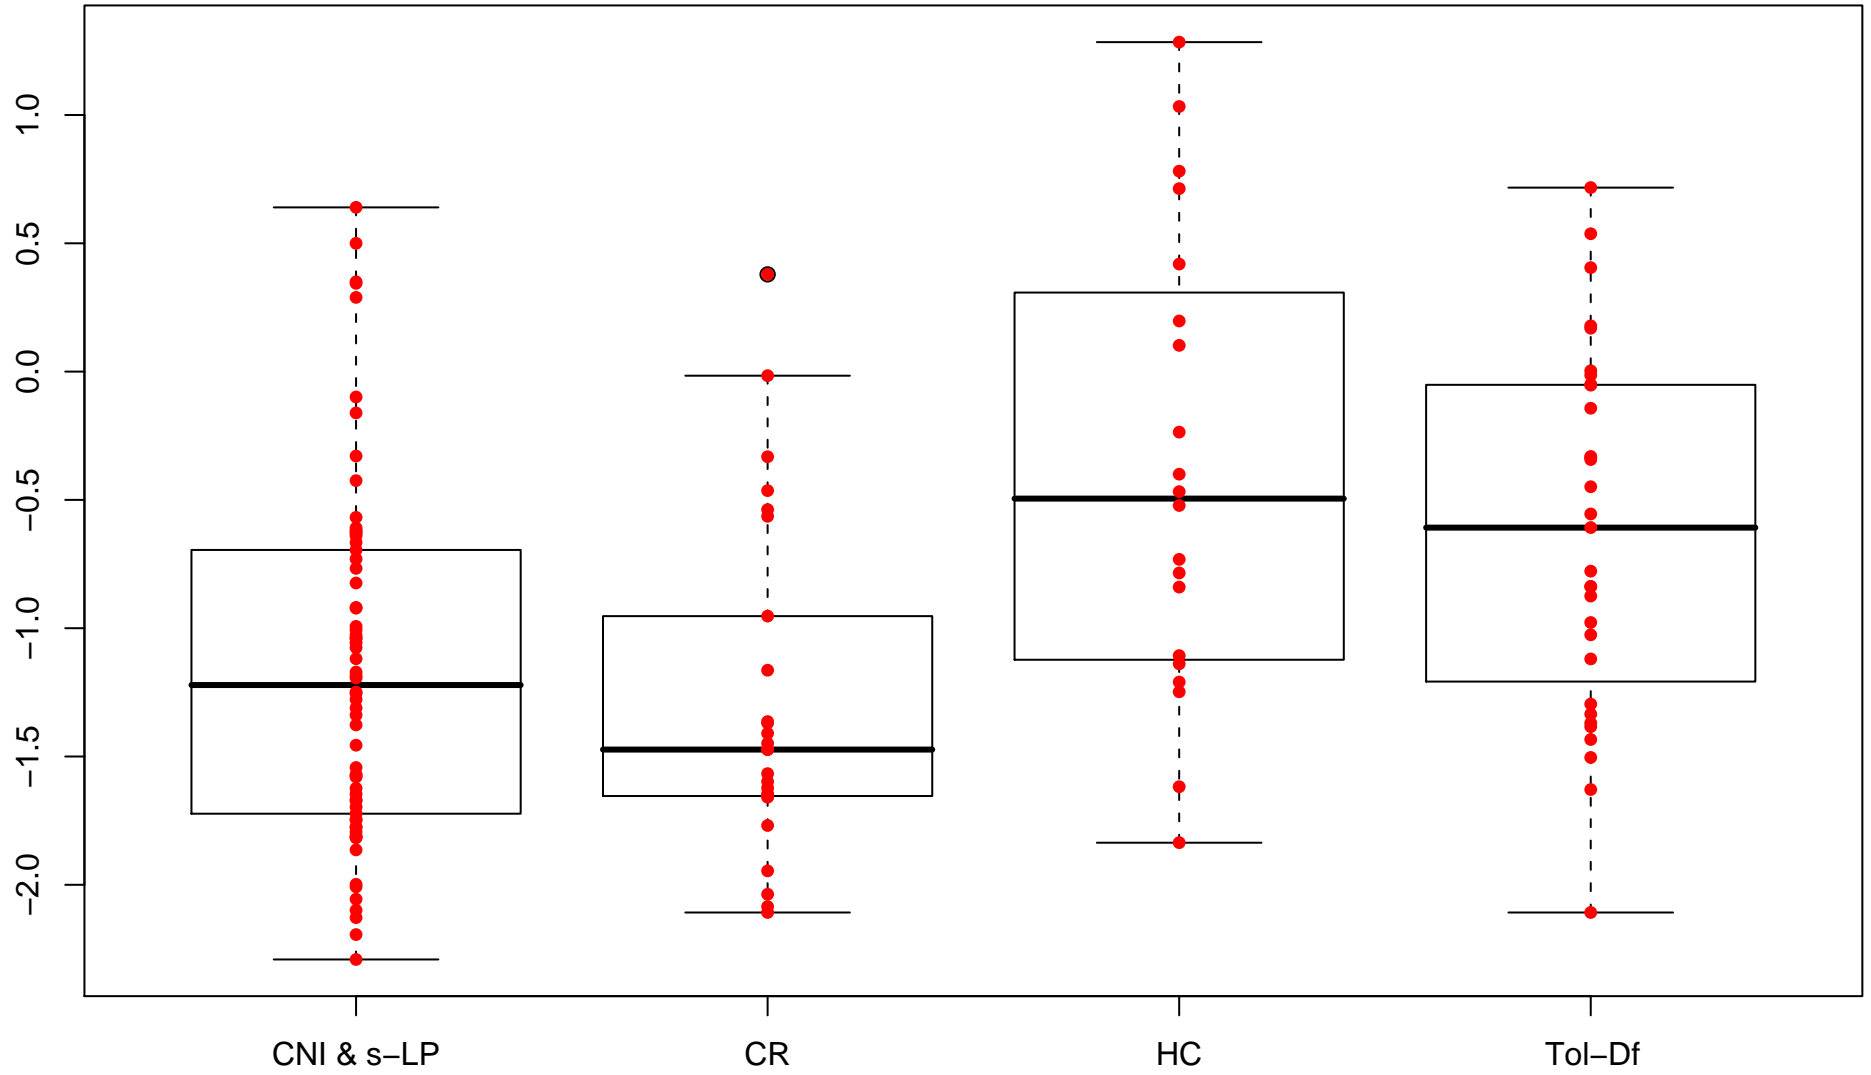

Rank 291 : DSE  
2.7347e-05

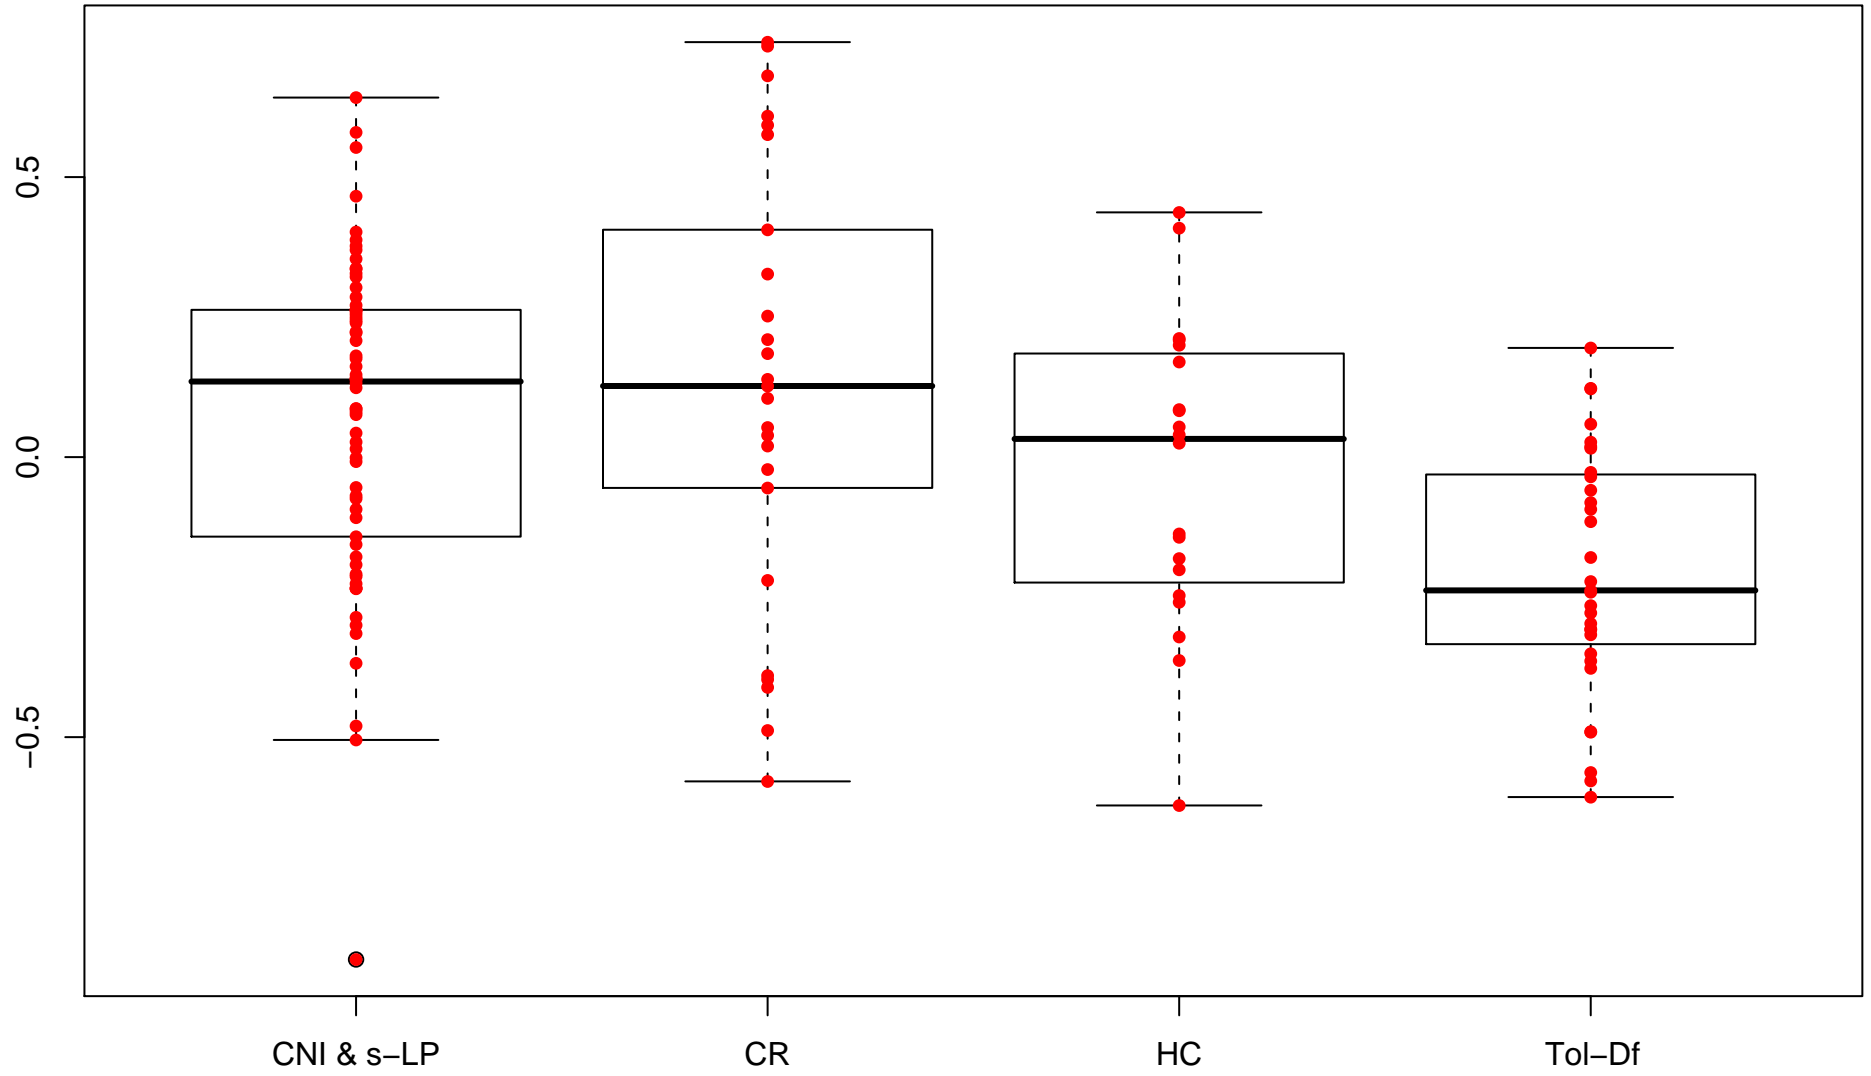

Rank 292 : CD3D  
2.758e-05

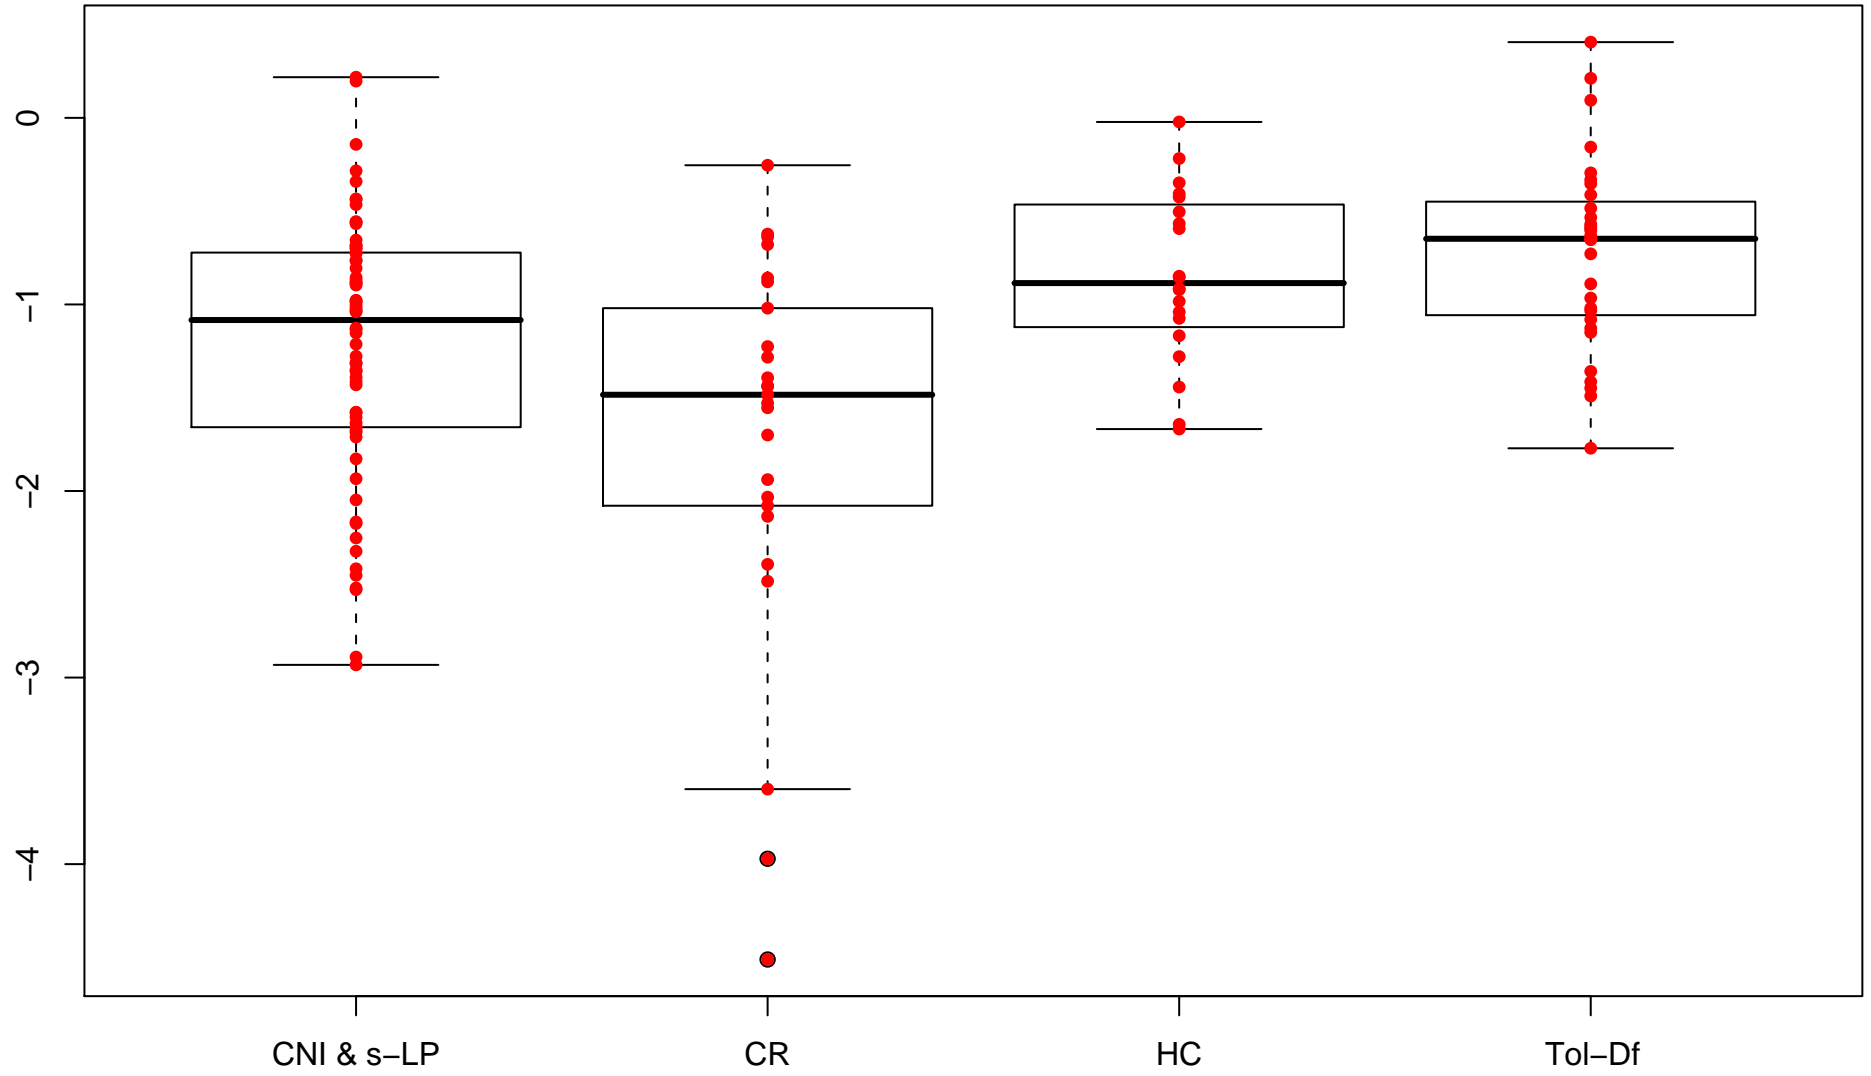

Rank 293 : TMEM106B  
2.8109e-05

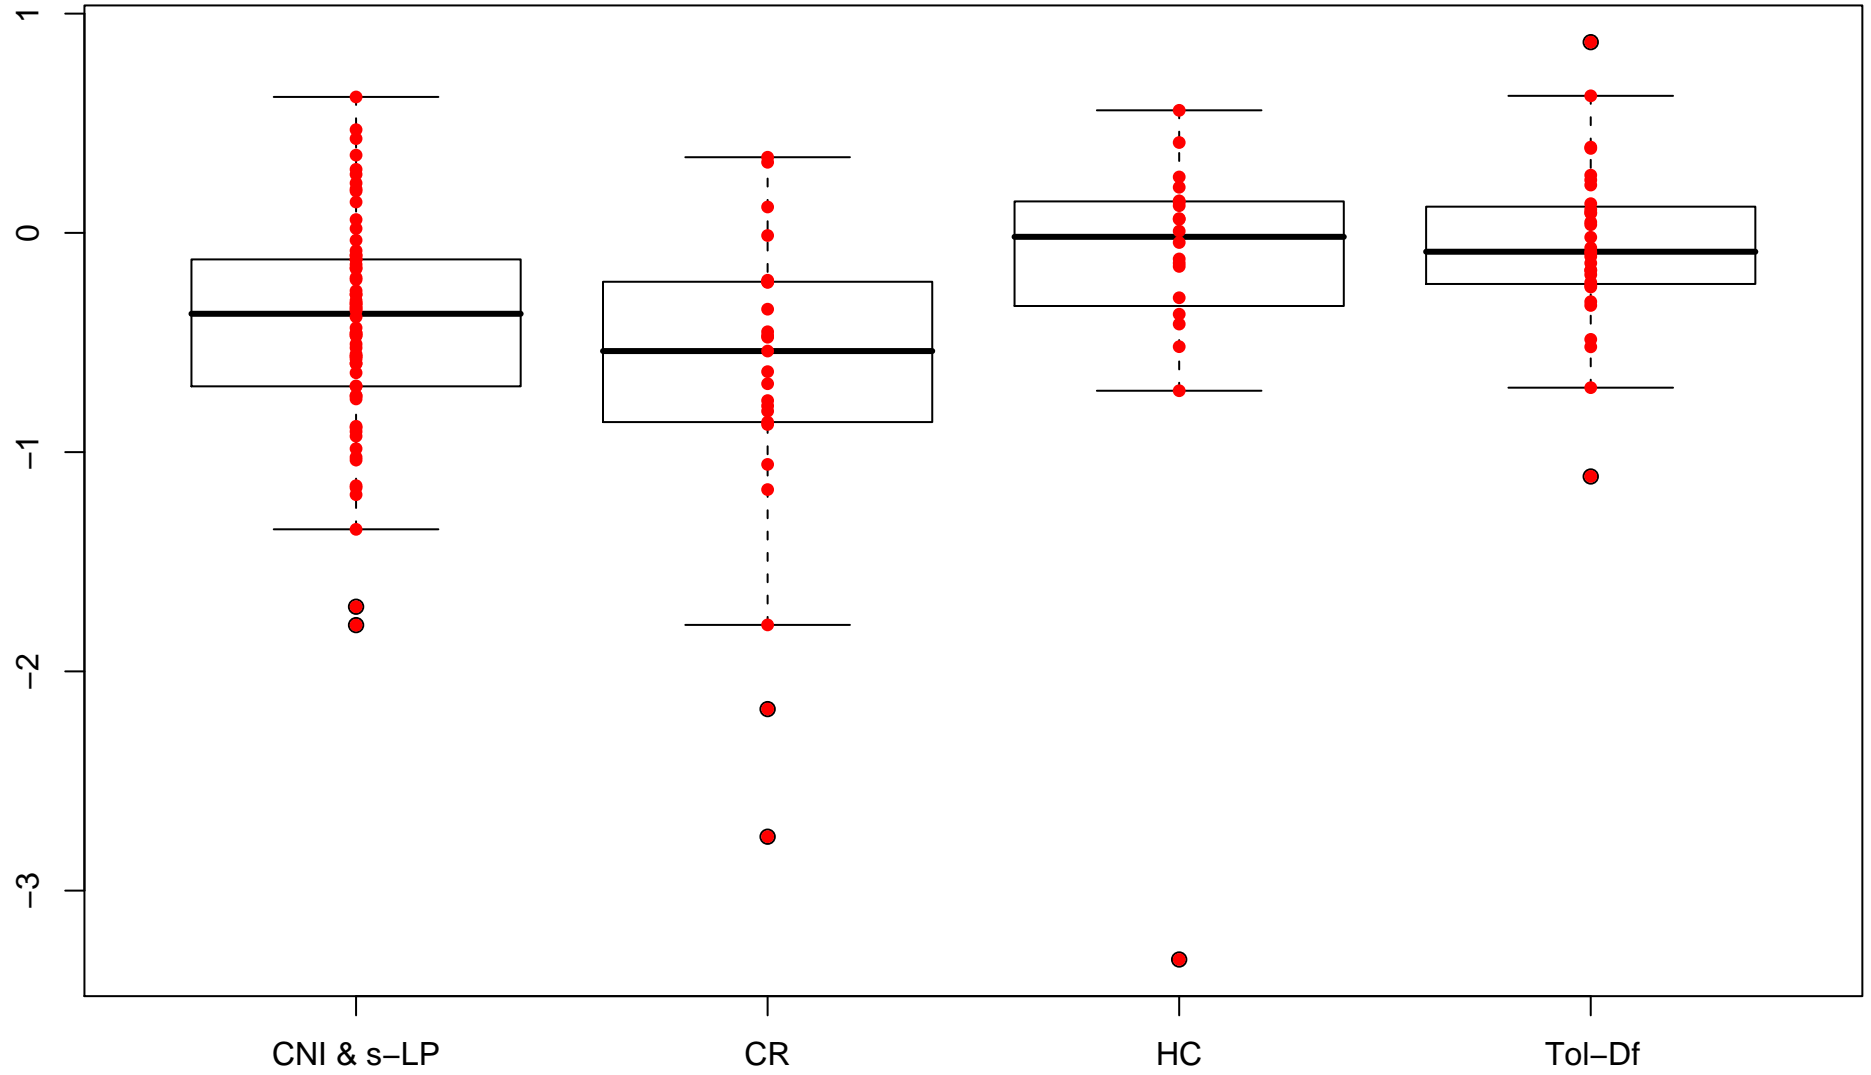

Rank 294 : CYFIP2  
2.8326e-05

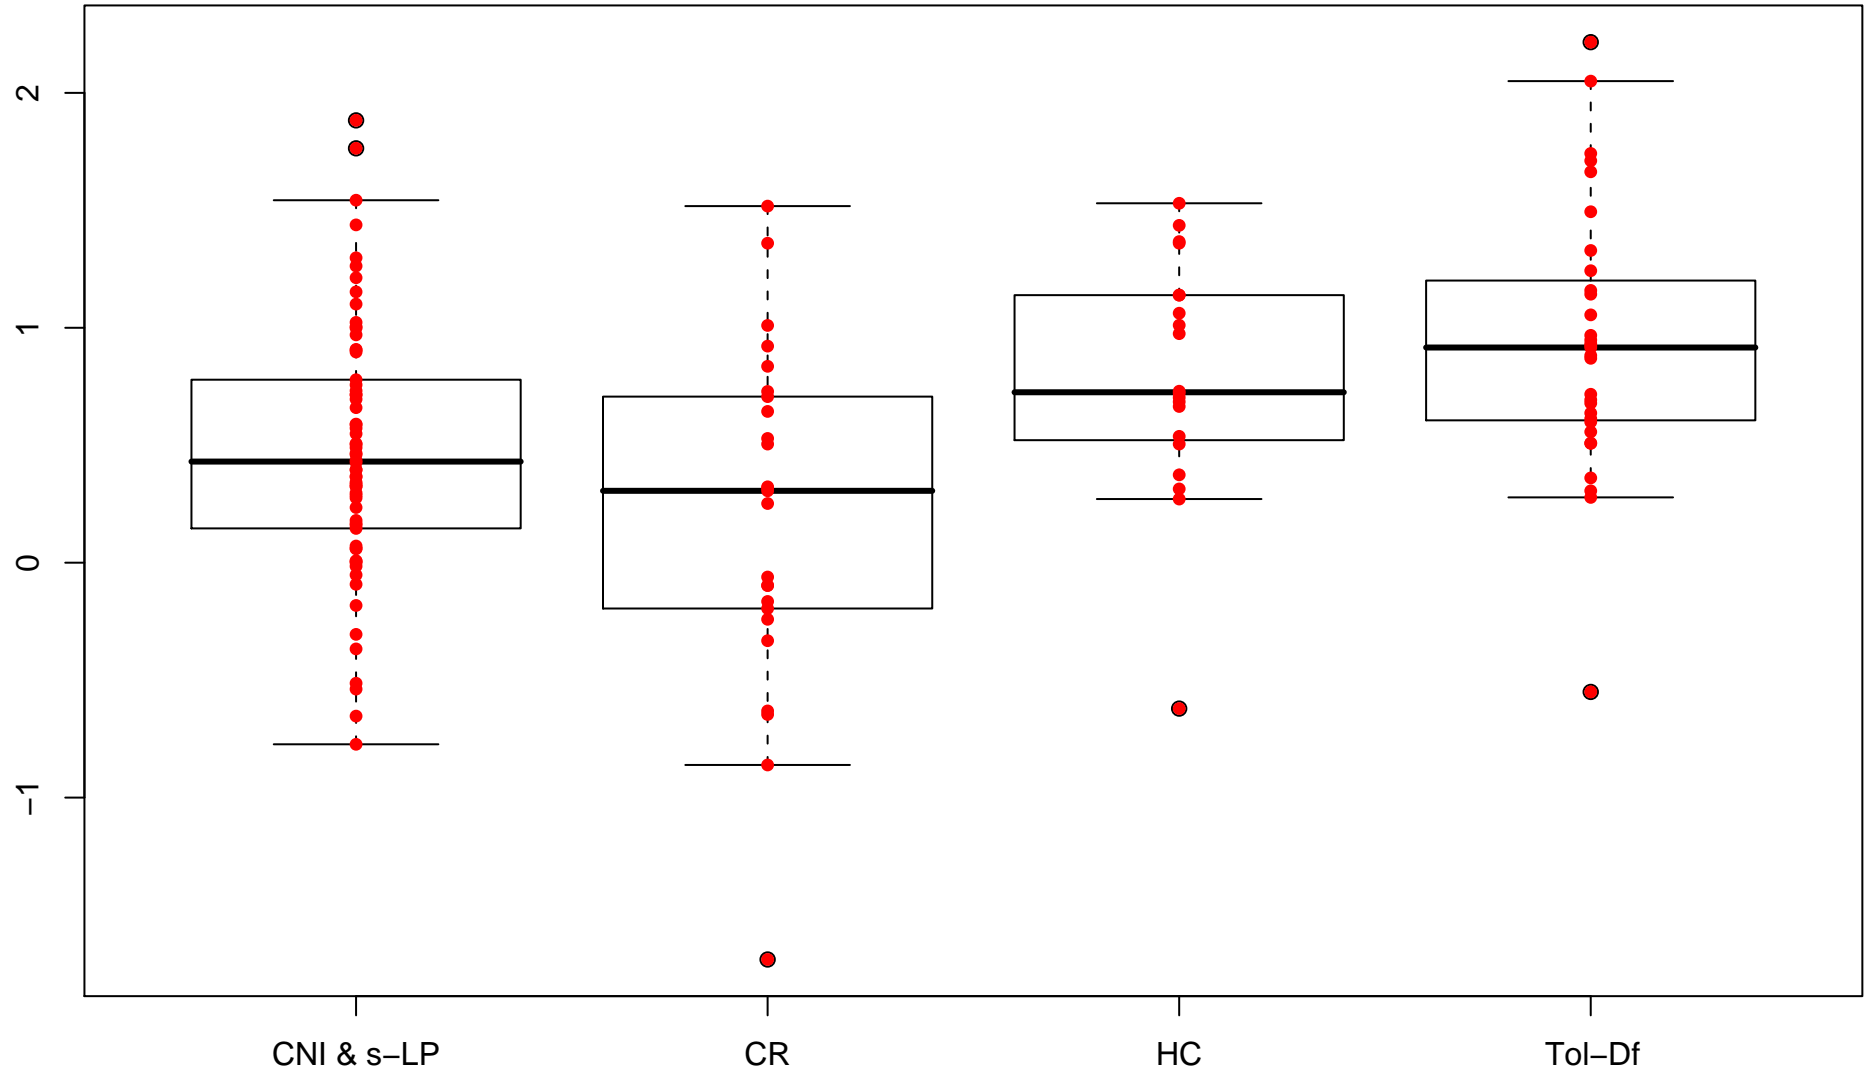

Rank 295 : LIN7A  
2.8693e-05

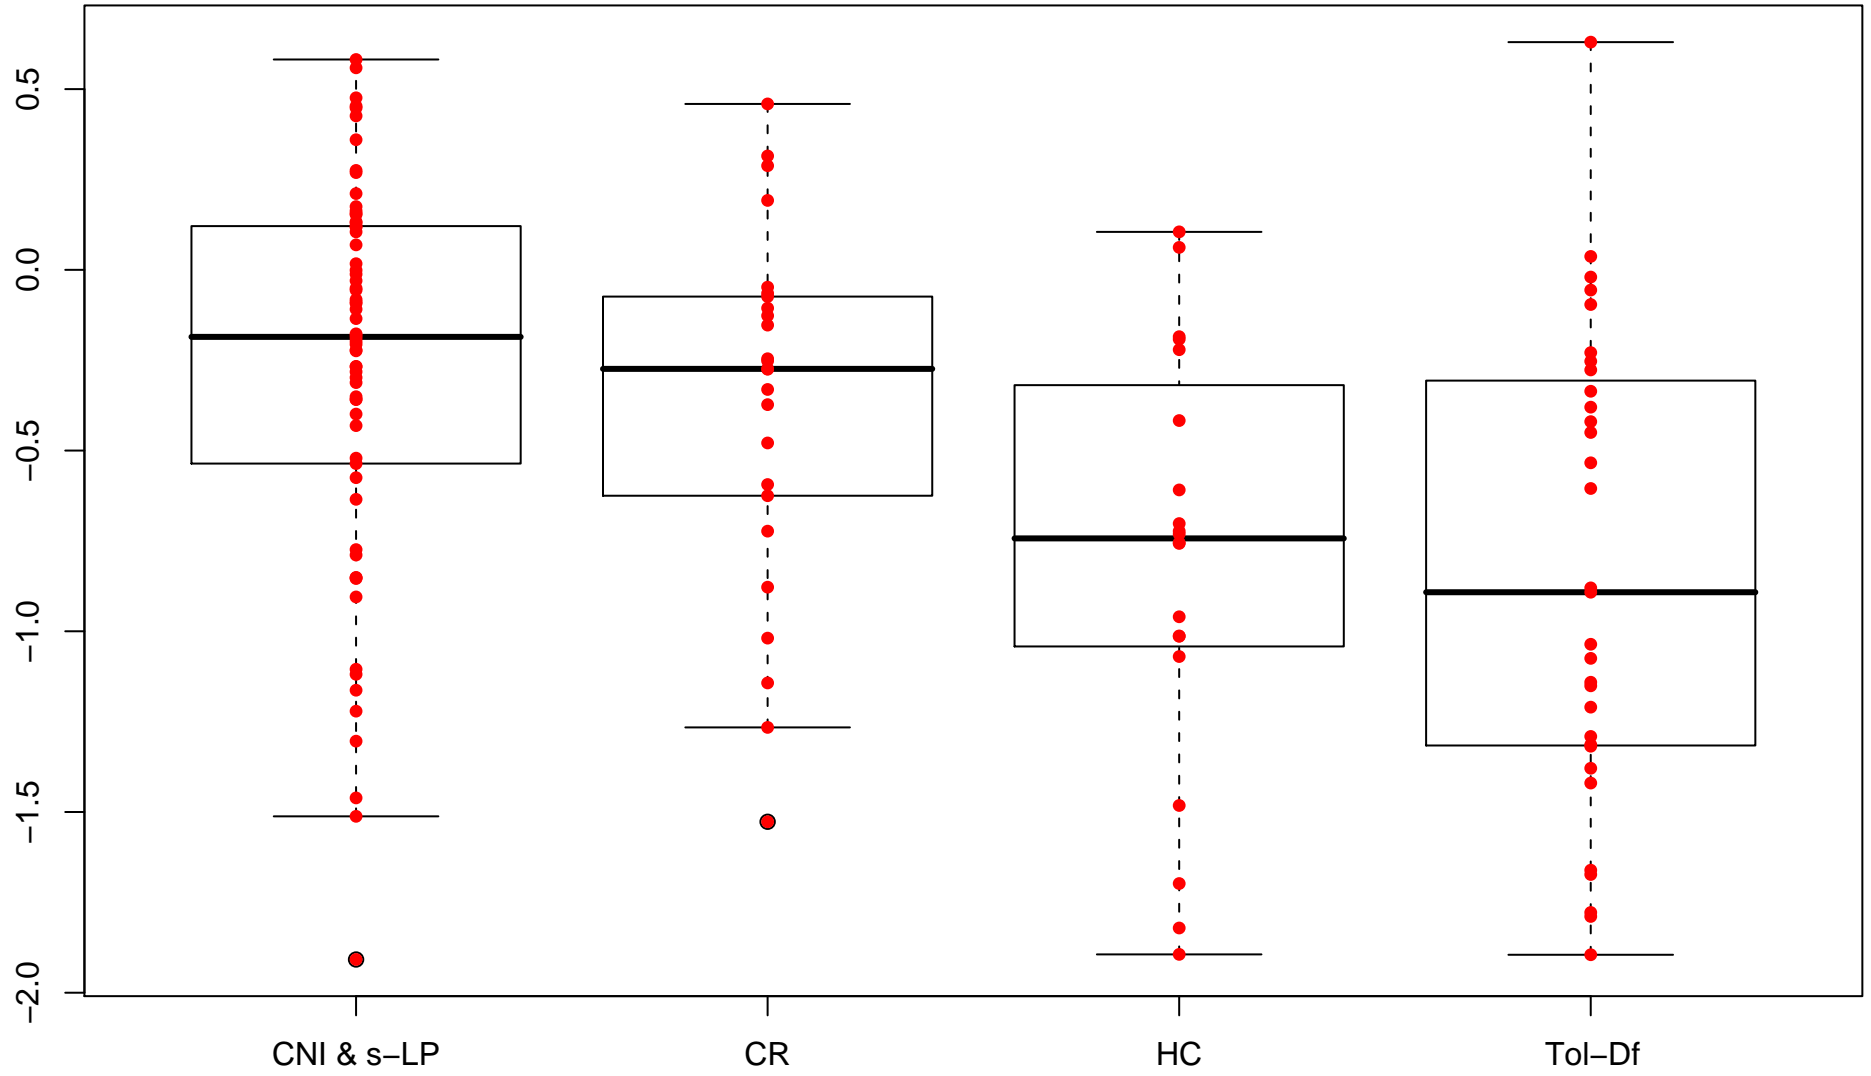



Rank 296 : ANK3  
2.8904e-05

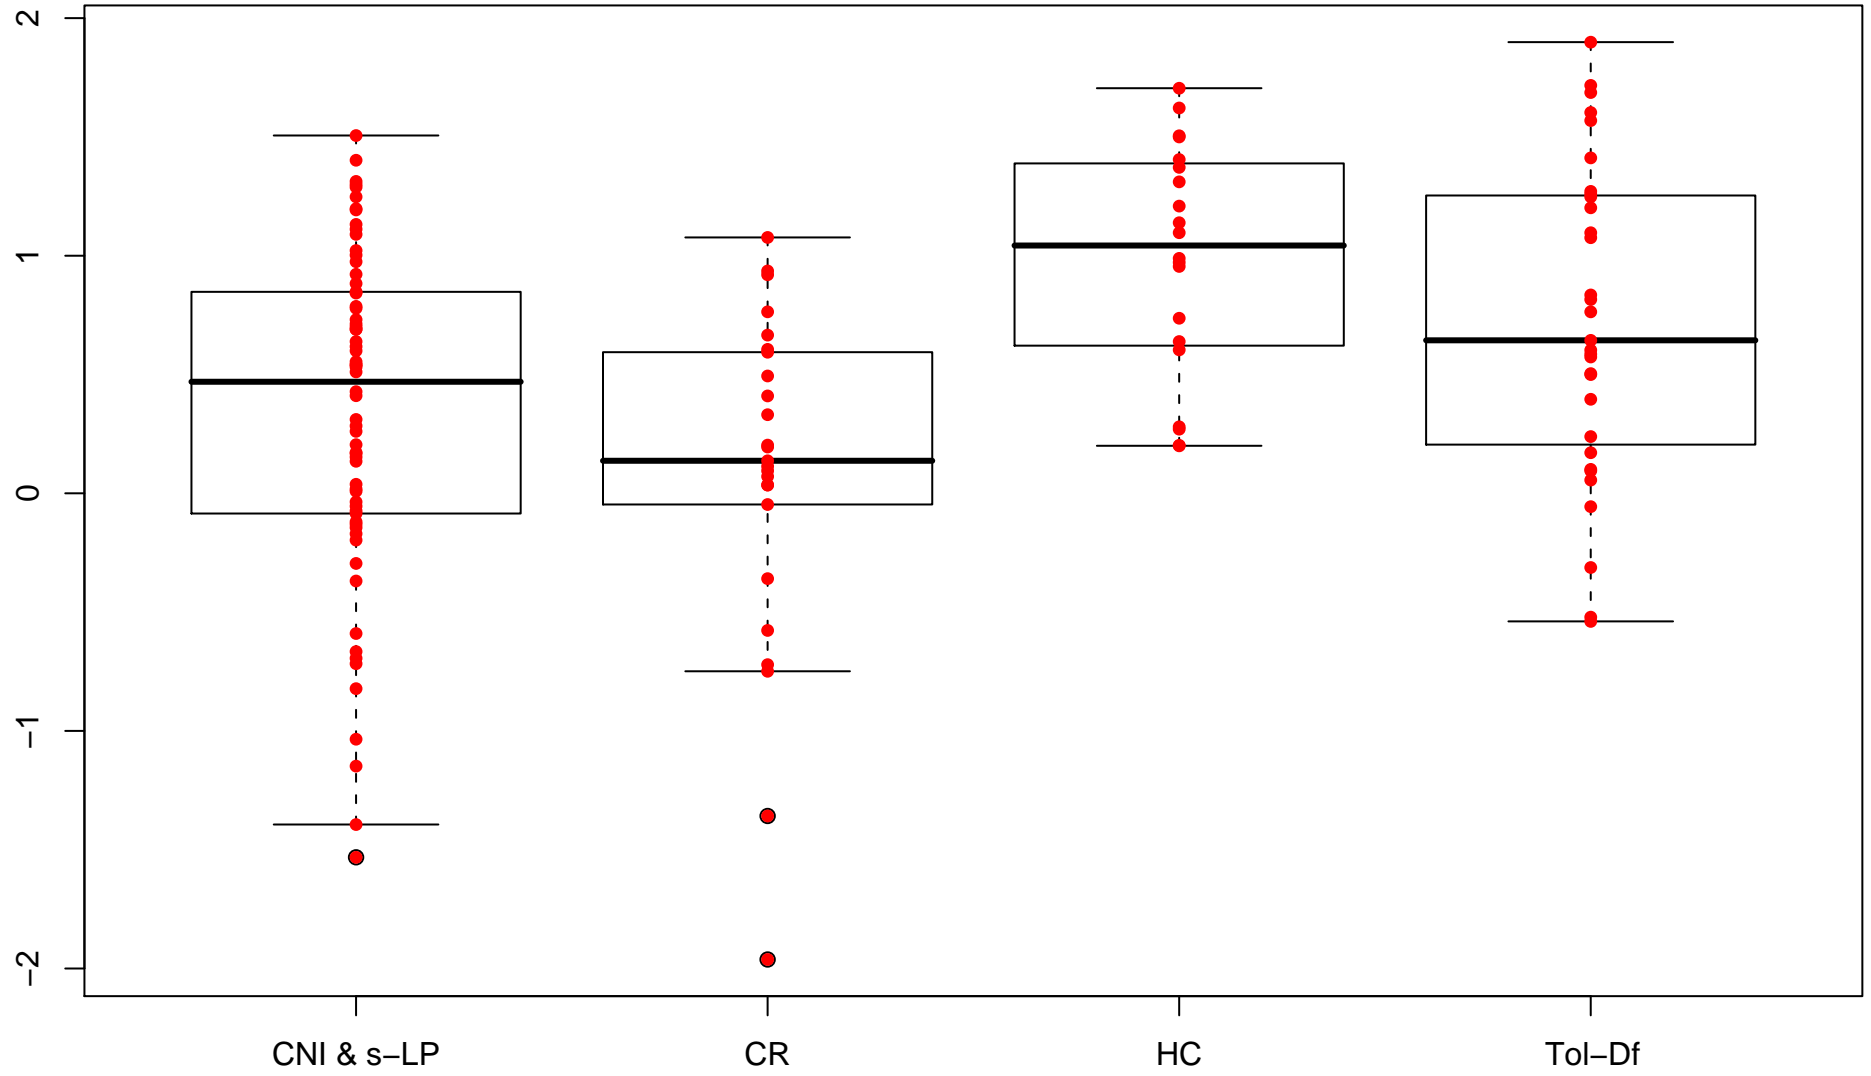

Rank 297 : RPL23  
2.9594e-05

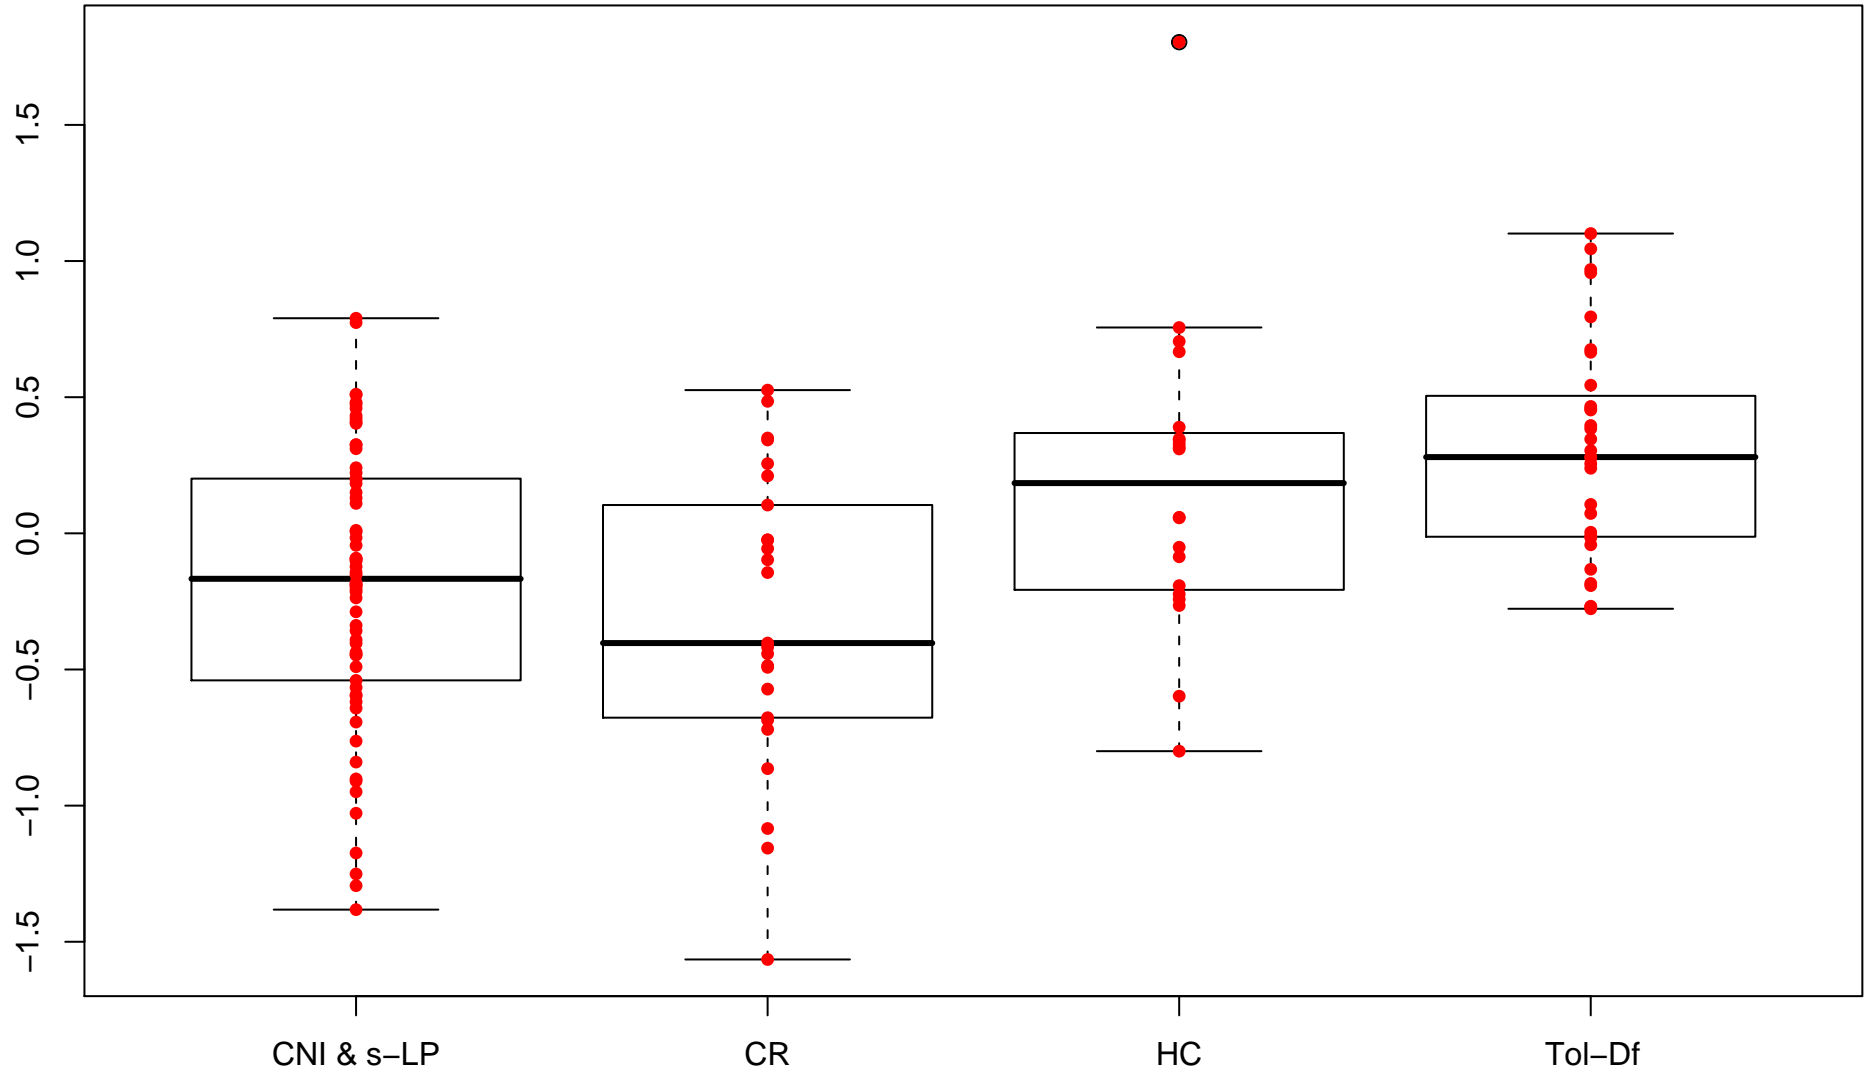

Rank 298 : PTPLAD1;LOC732402  
2.9982e-05

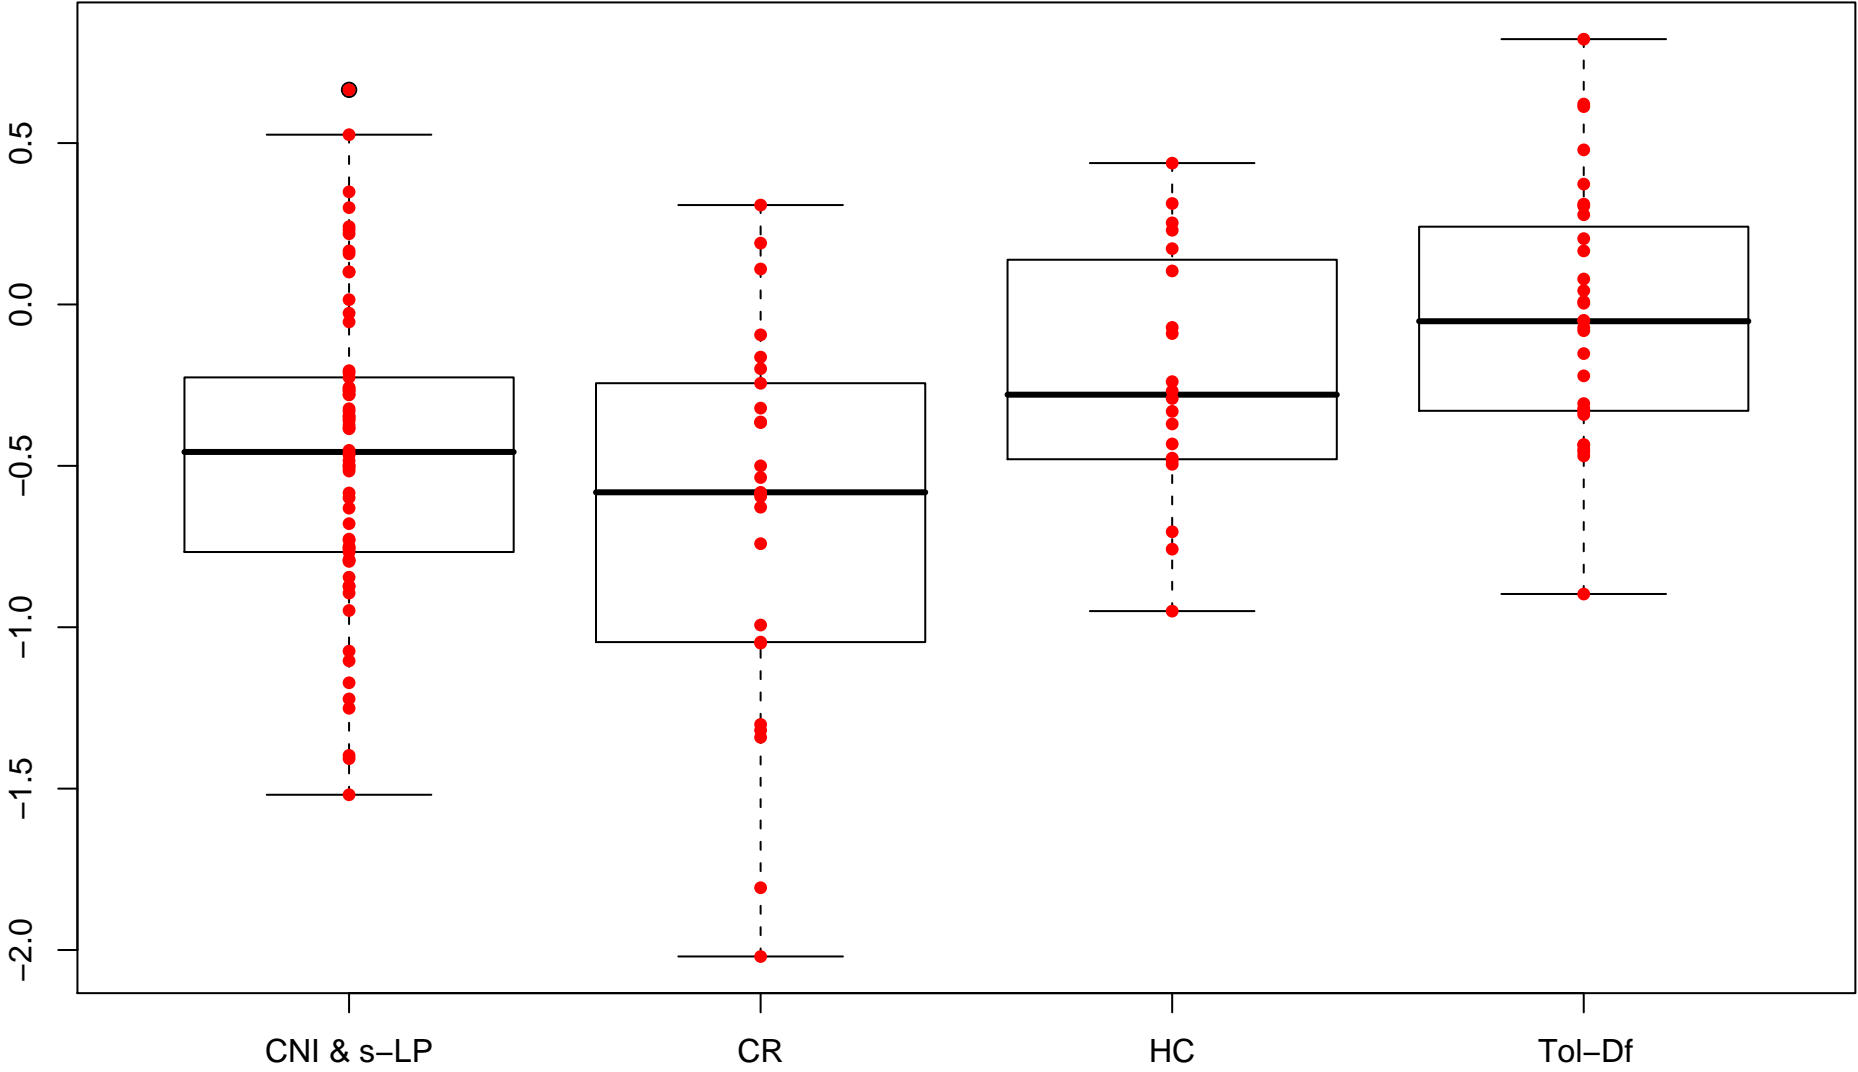

Rank 299 : LYCAT  
3.0133e-05

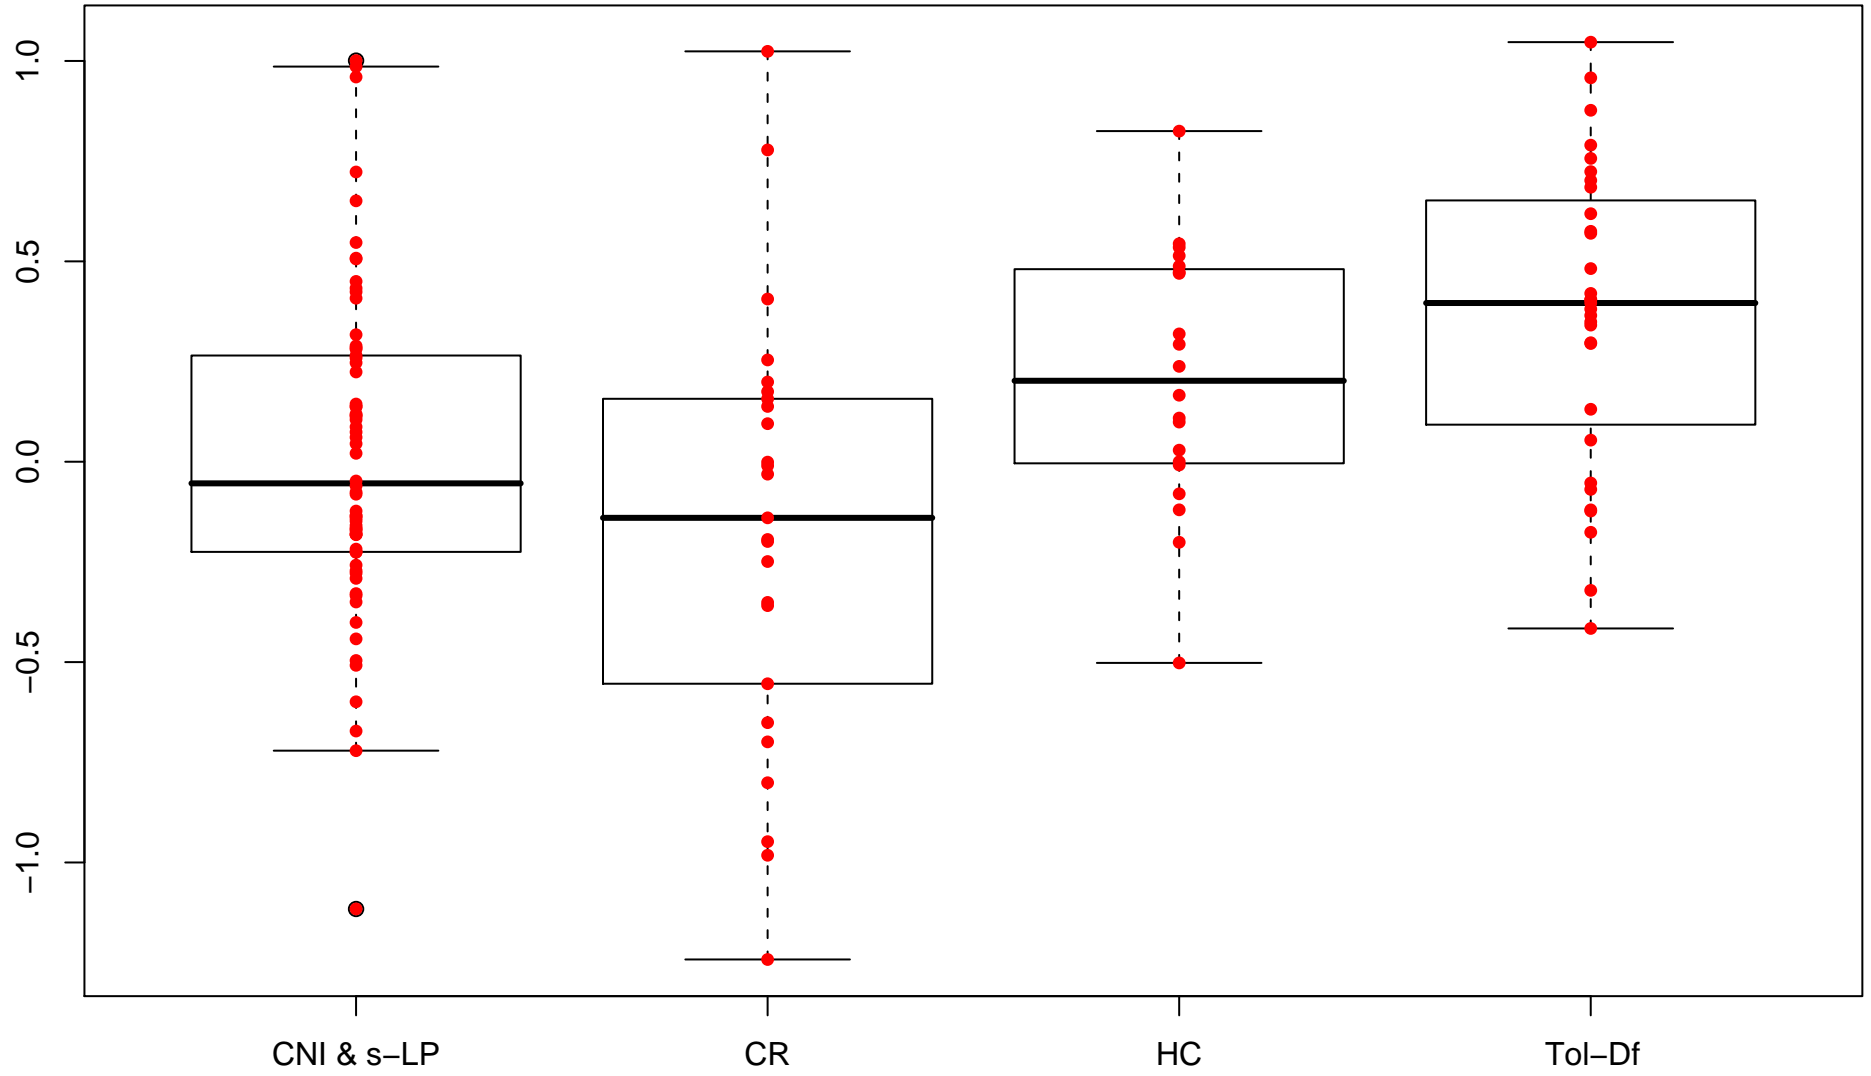

Rank 300 : MAD2L1  
3.0174e-05

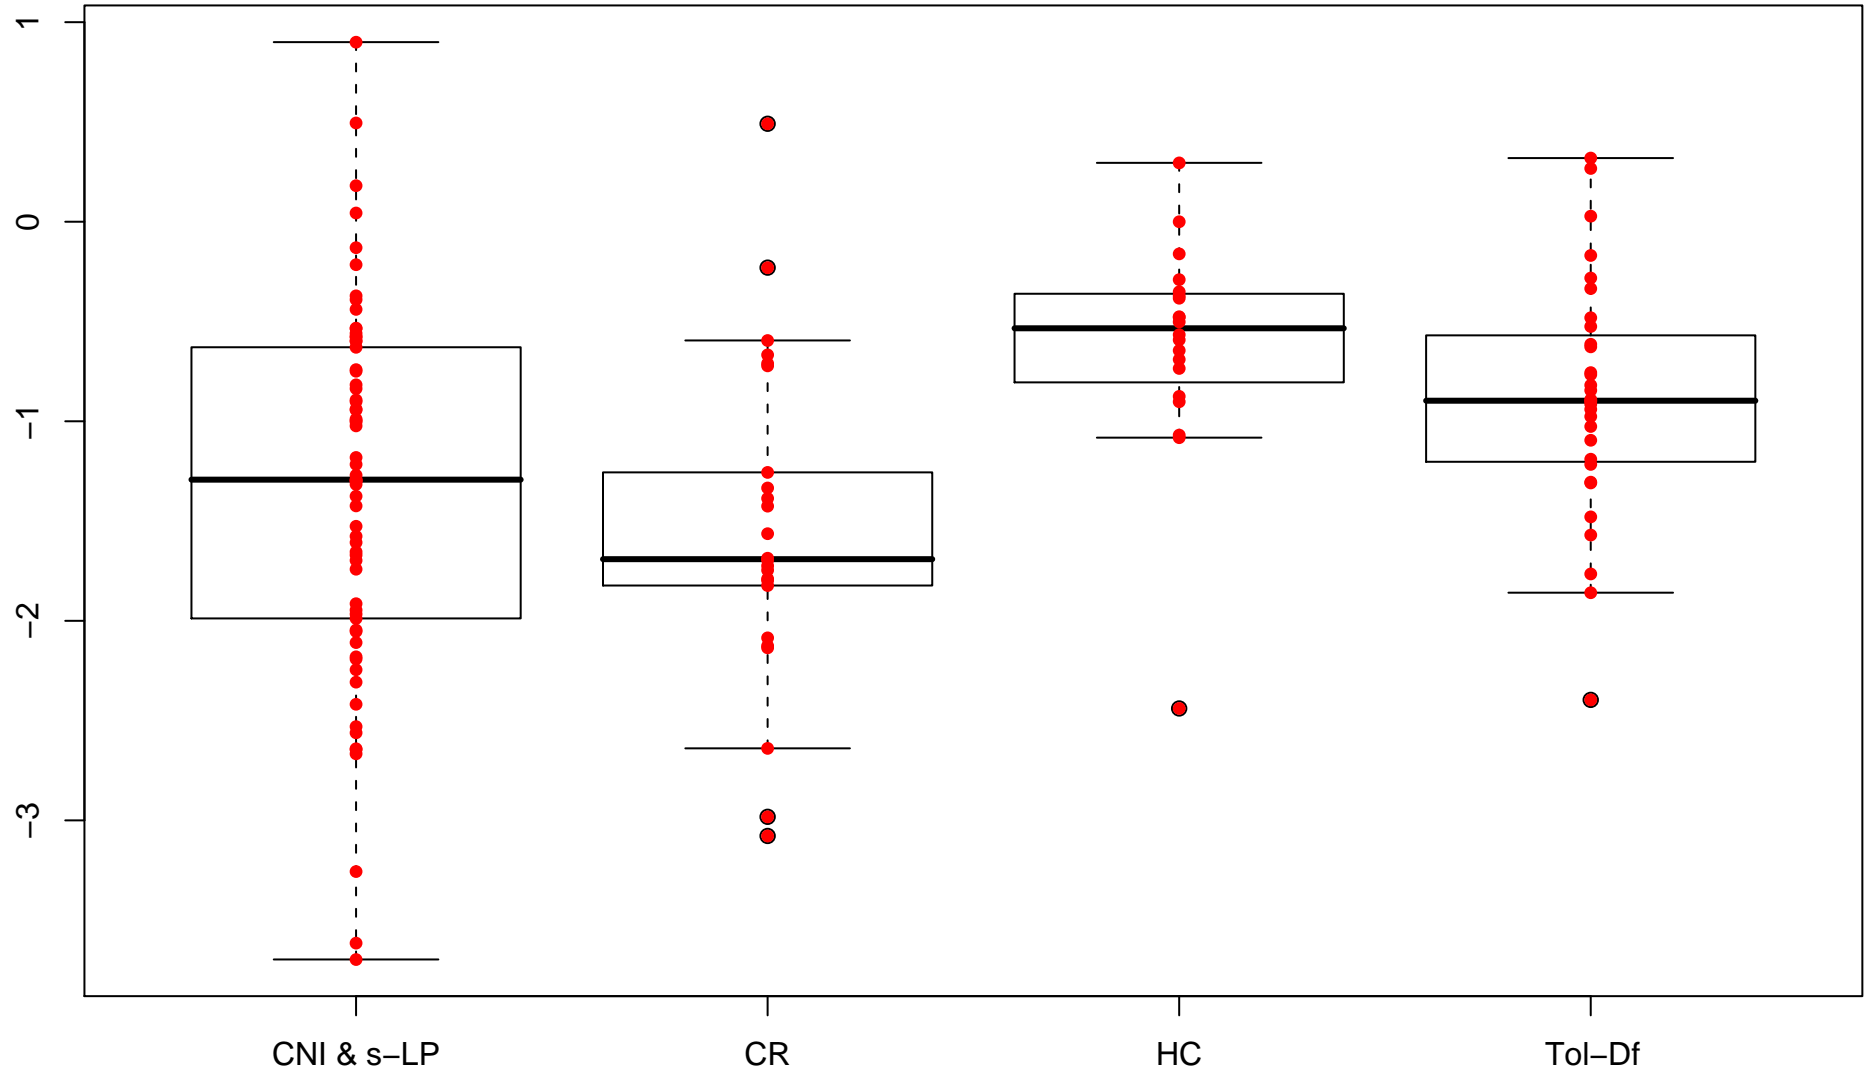

Rank 301 : FCRL5  
3.0387e-05

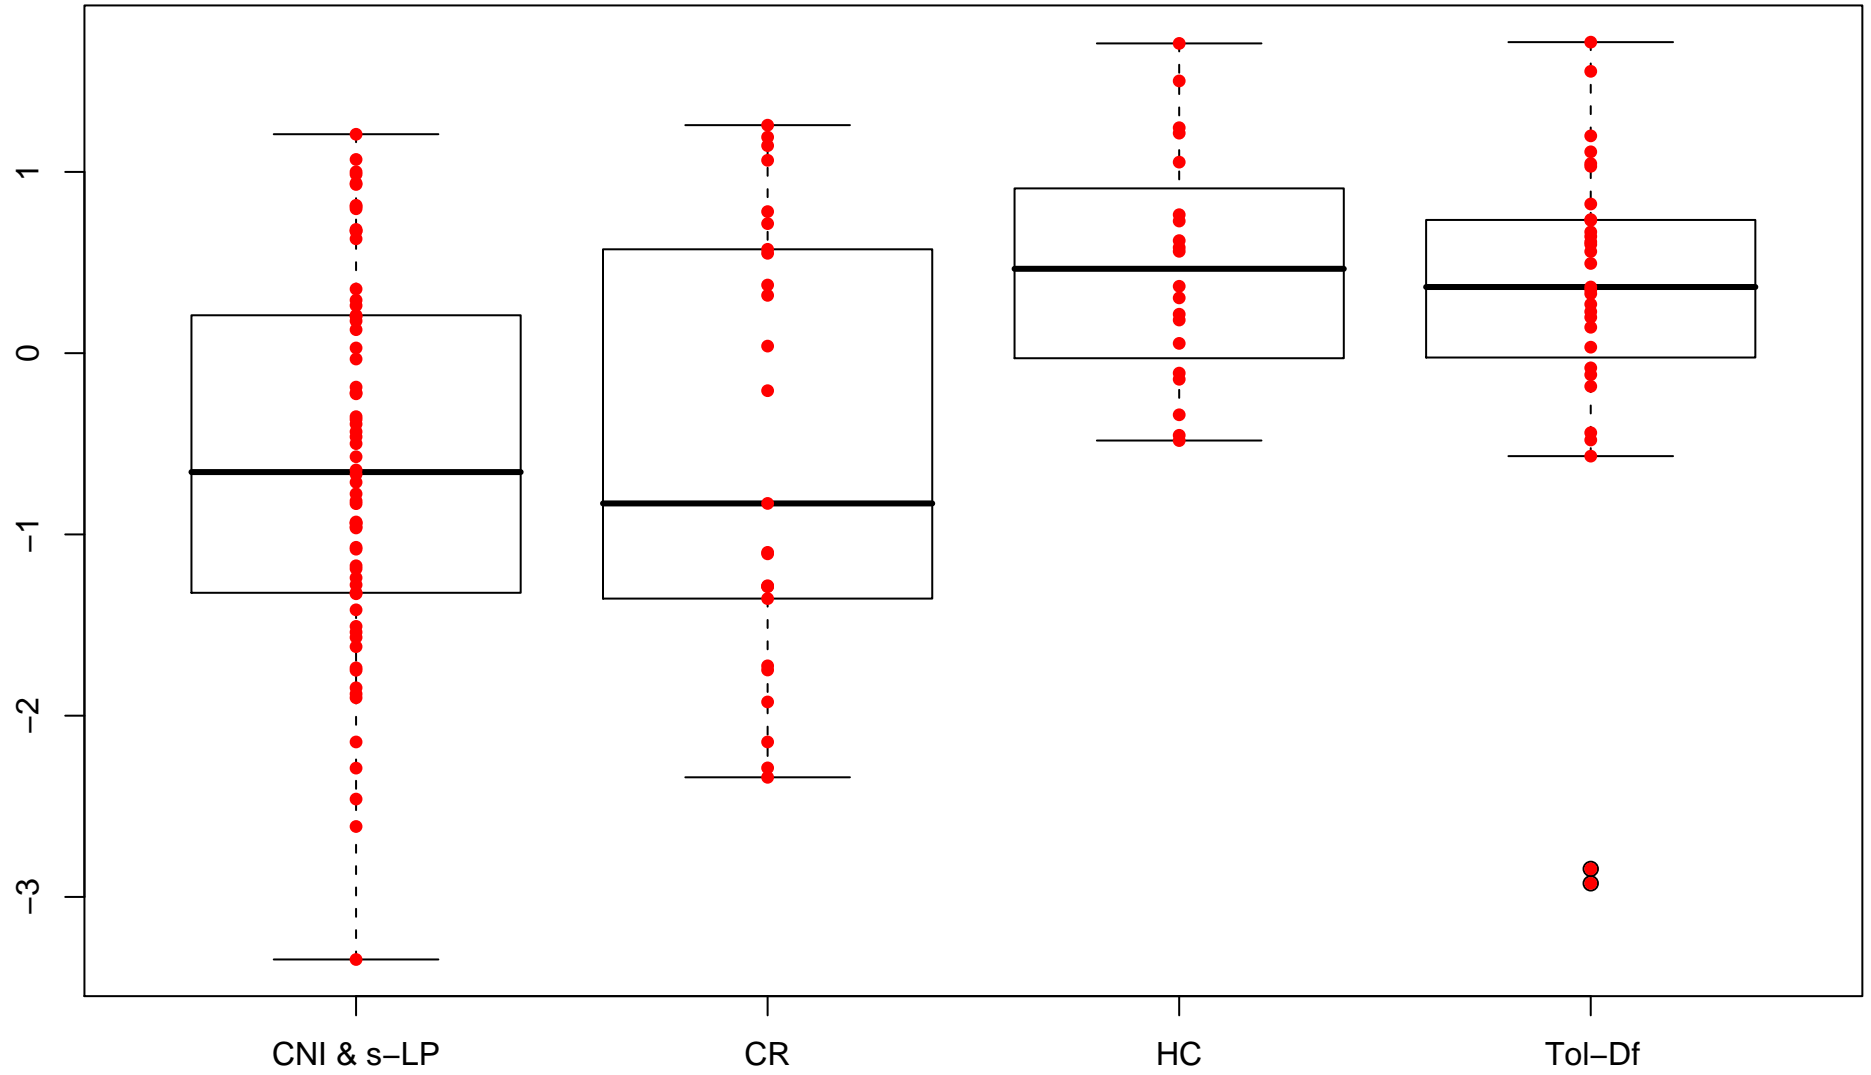

Rank 302 : PITPNM1  
3.0996e-05

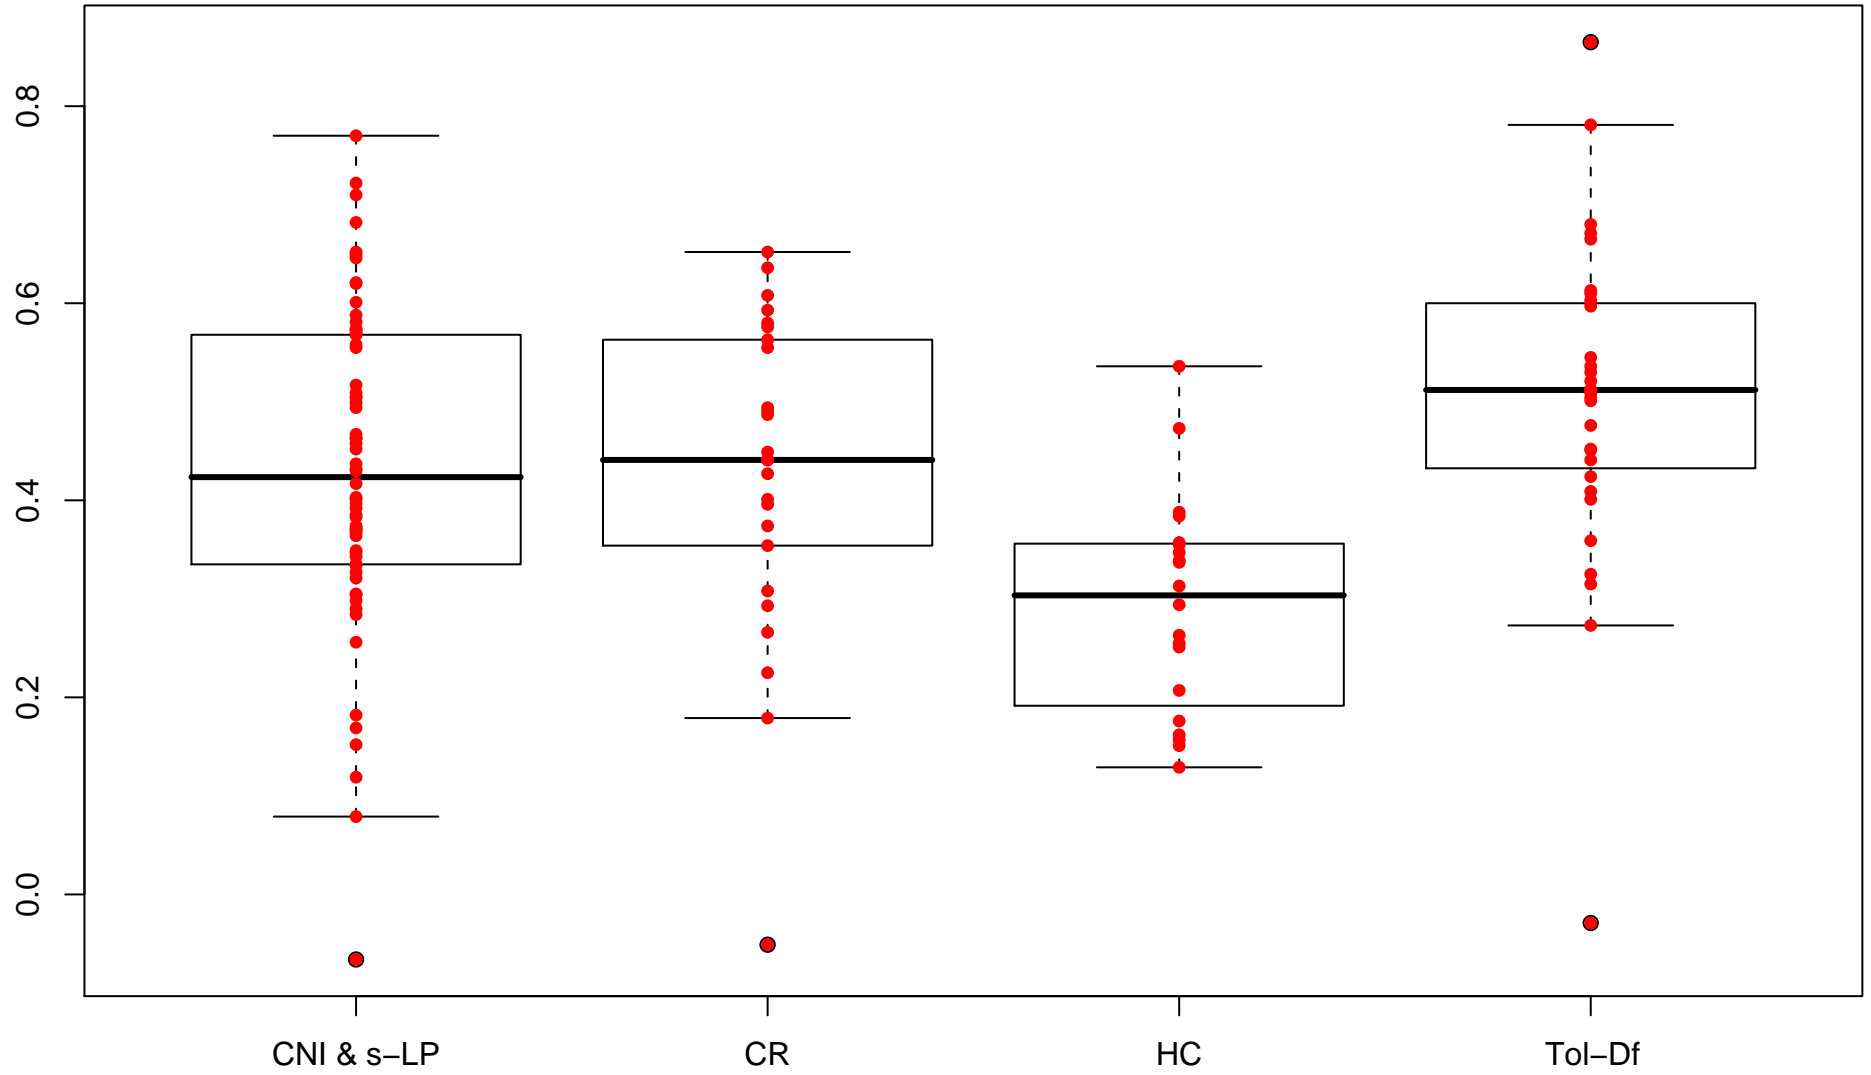

Rank 303 : C1QB  
3.0998e-05

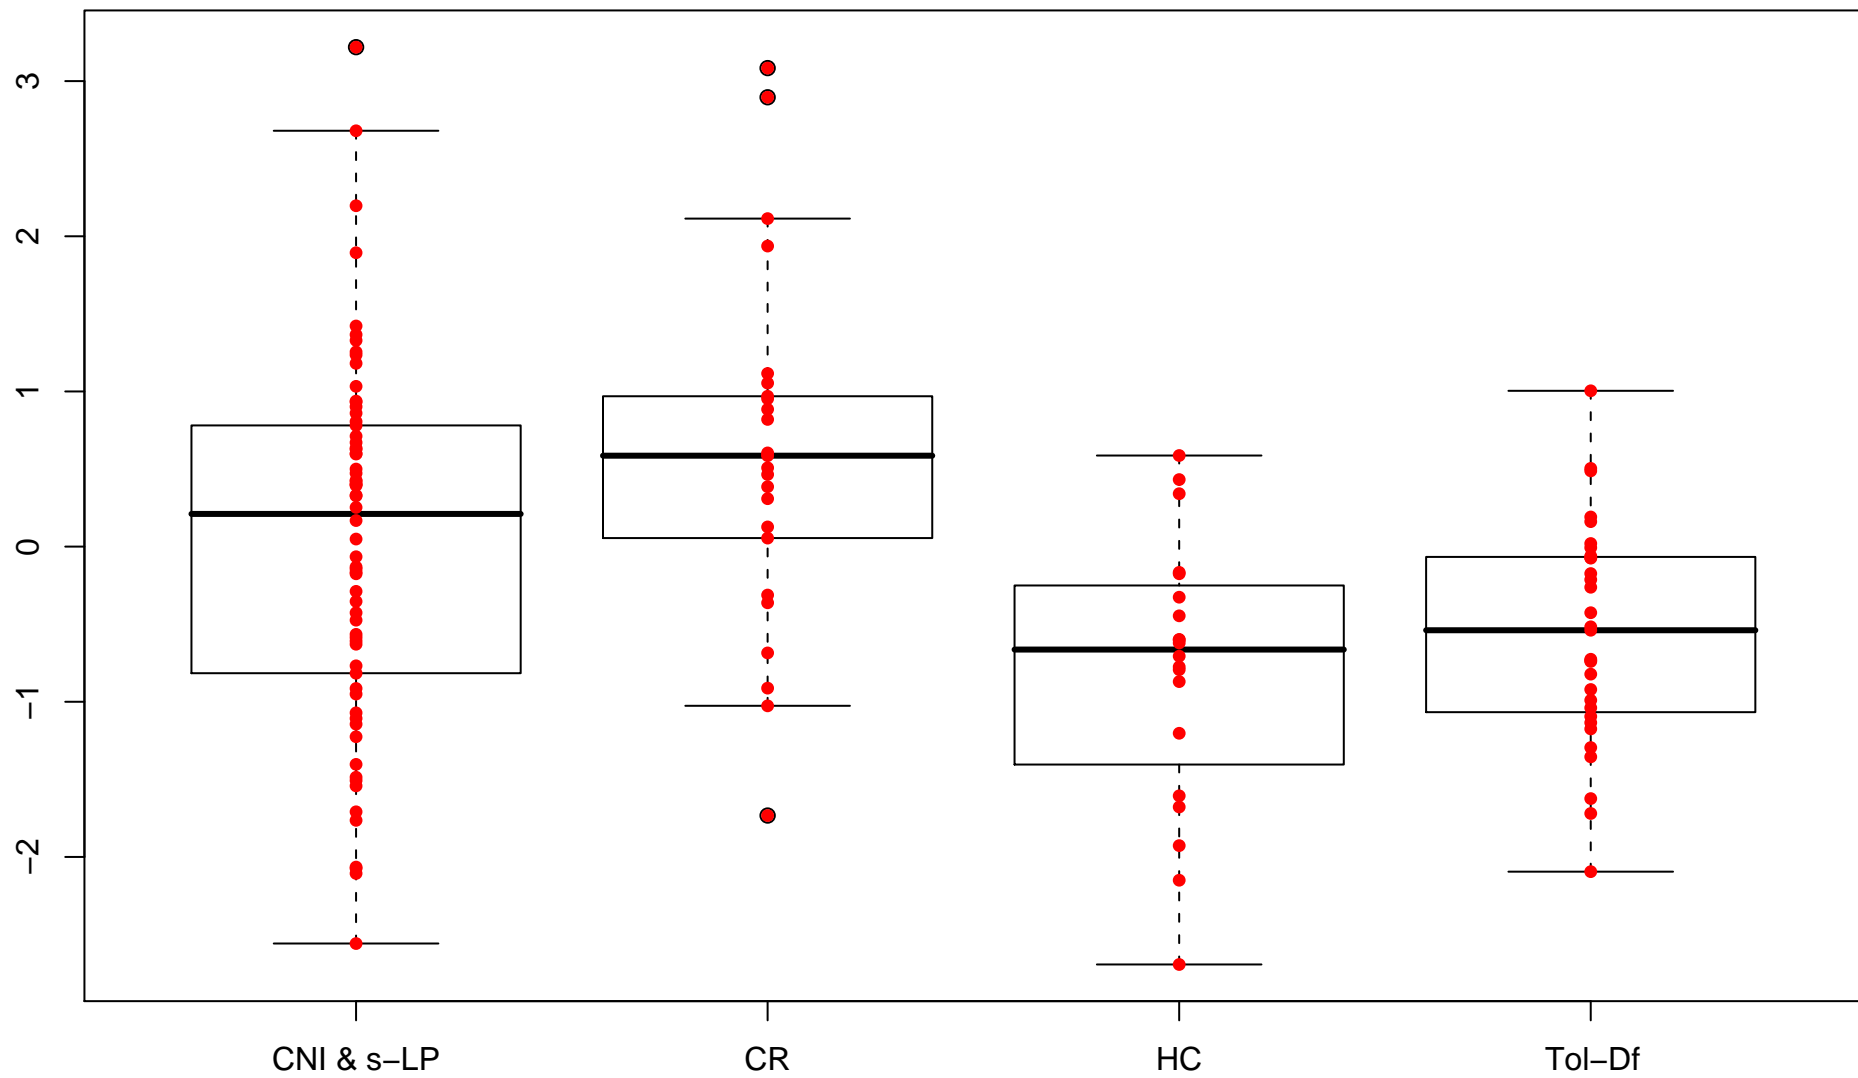



Rank 304 : RPL15  
3.1129e-05

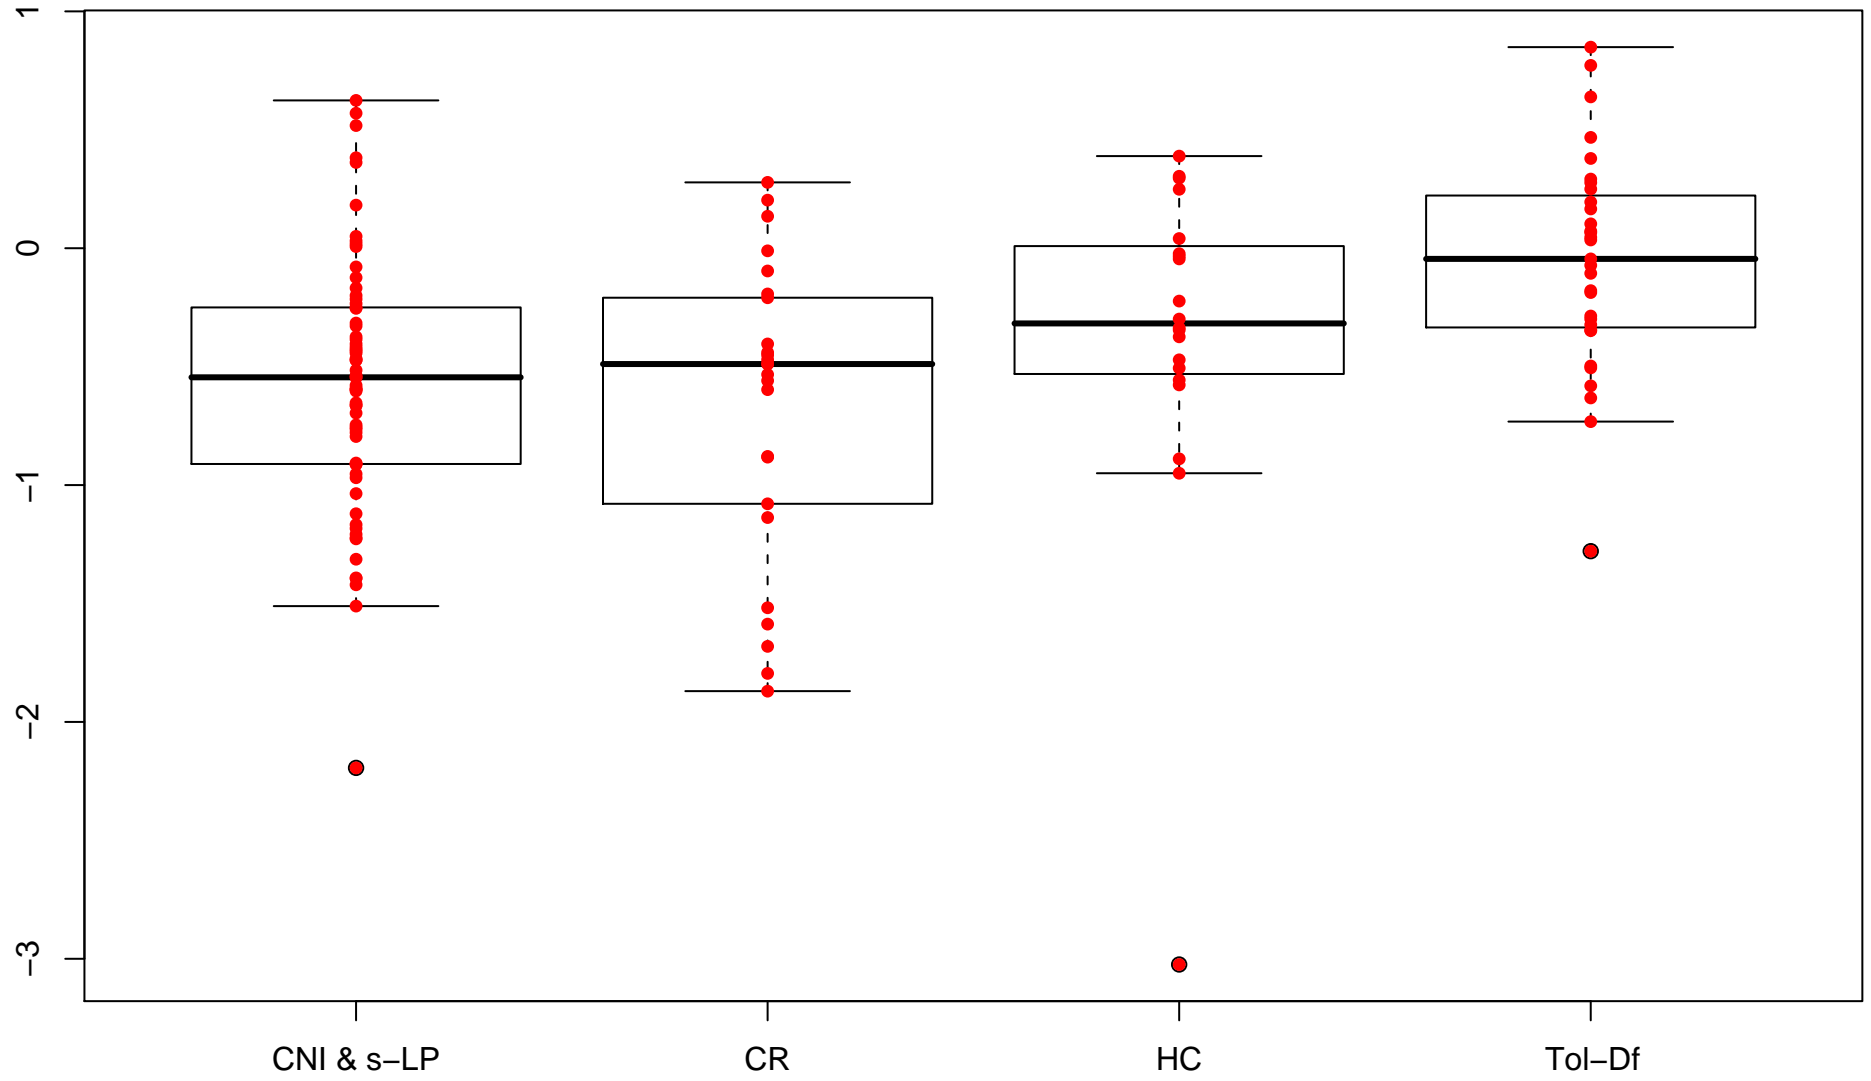

Rank 305 : DDR1  
3.244e-05

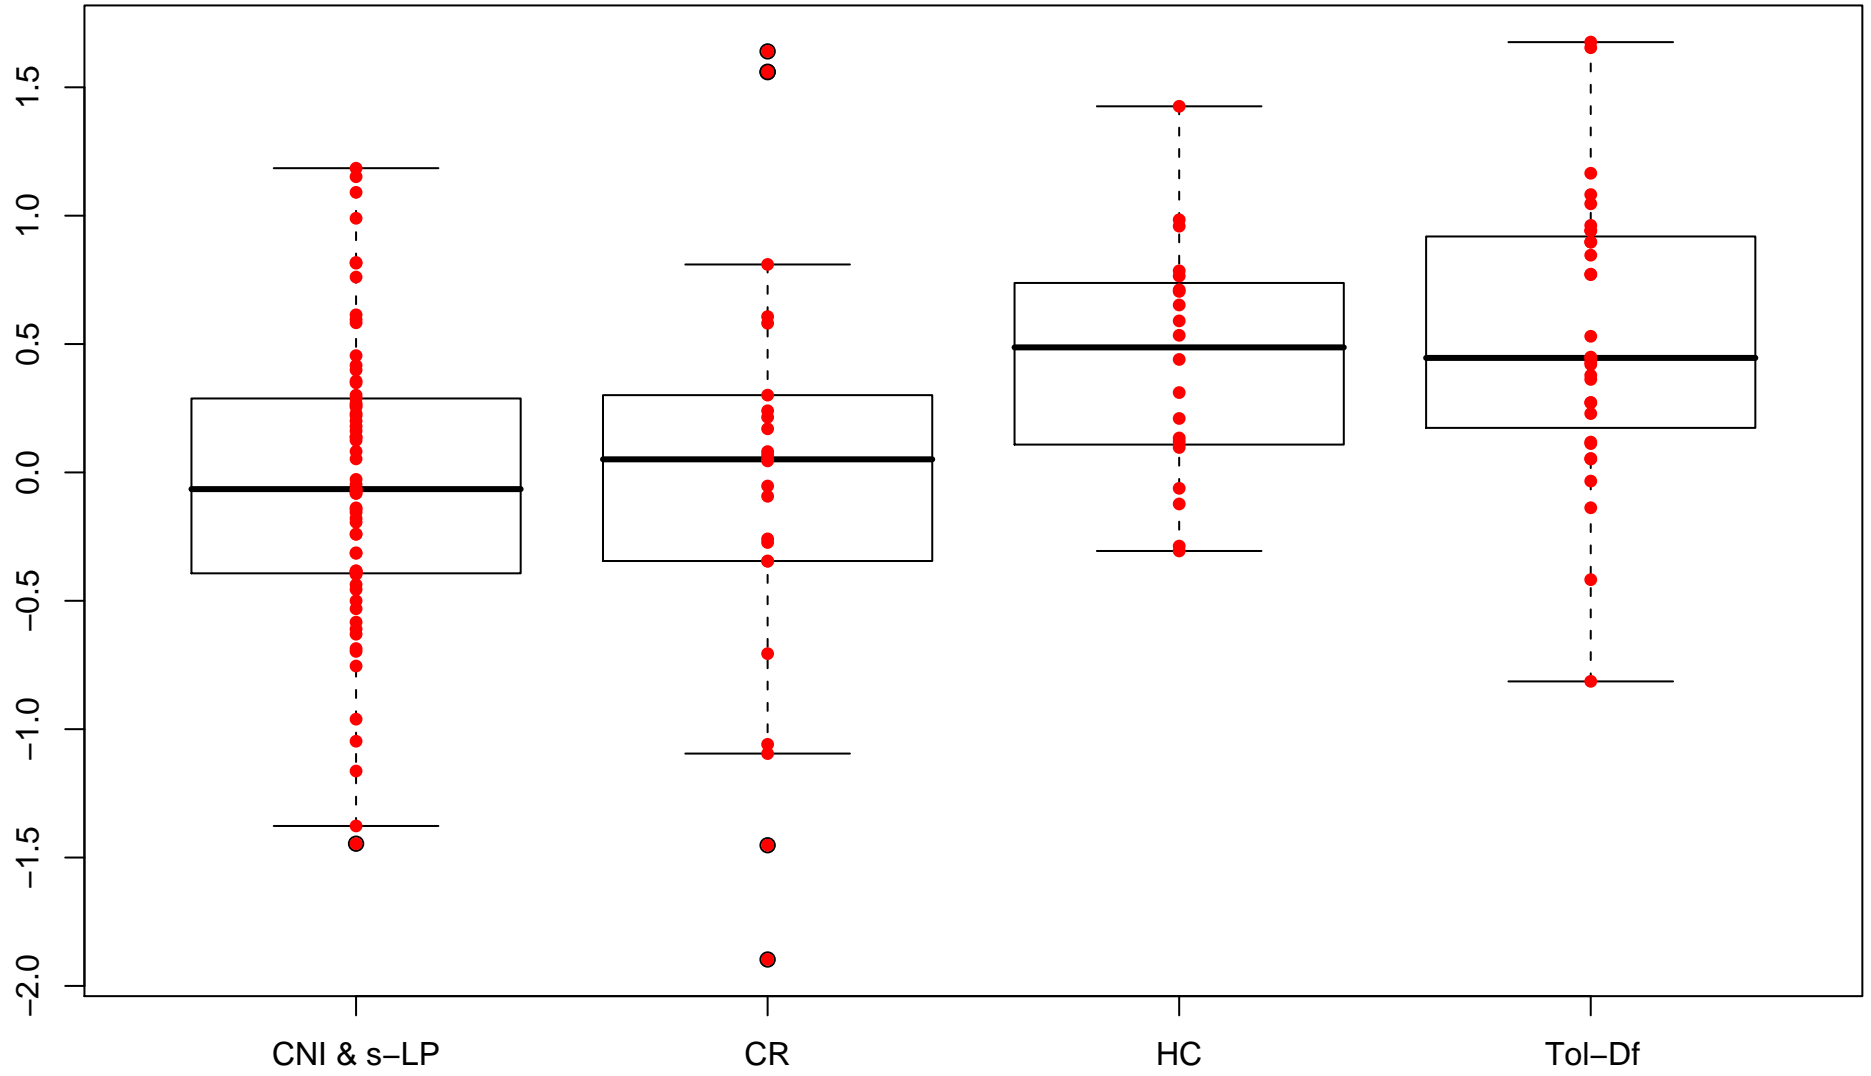

Rank 306 : SERPINA1  
3.551e-05

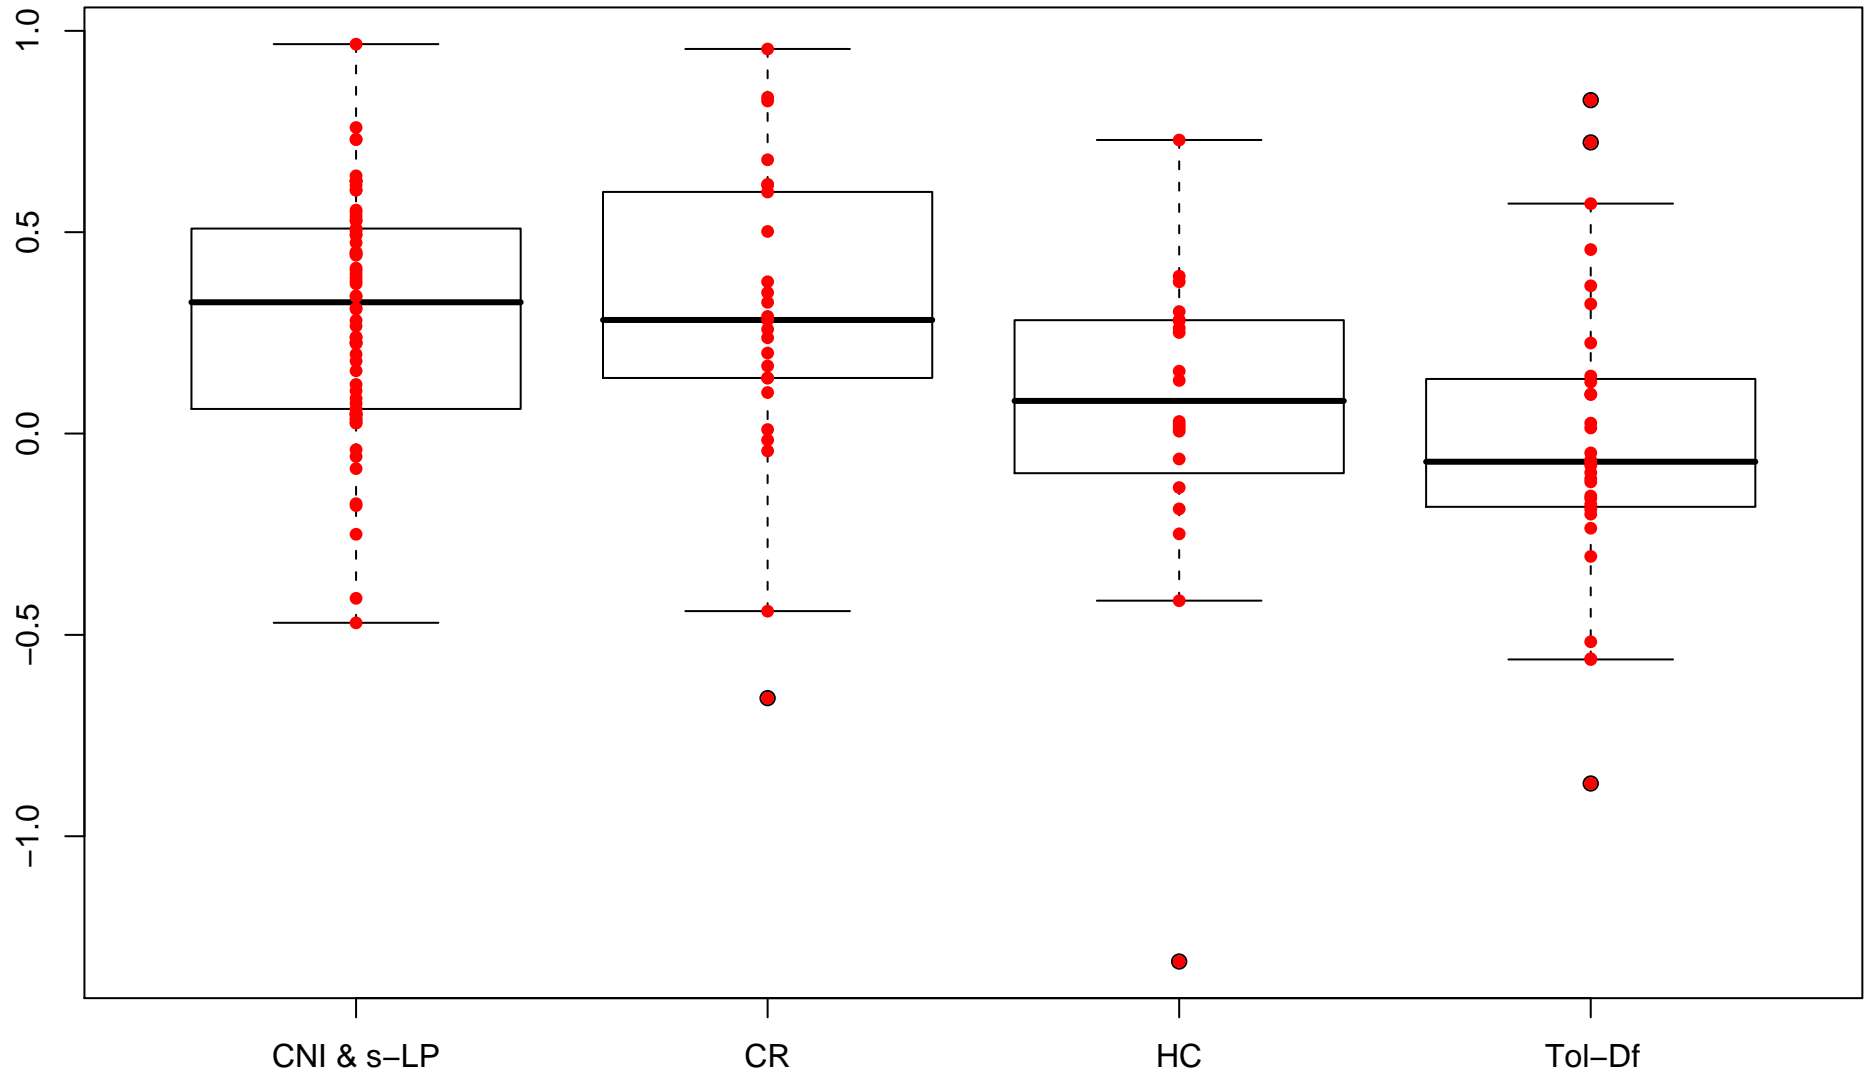

Rank 307 : COX6A1  
3.555e-05

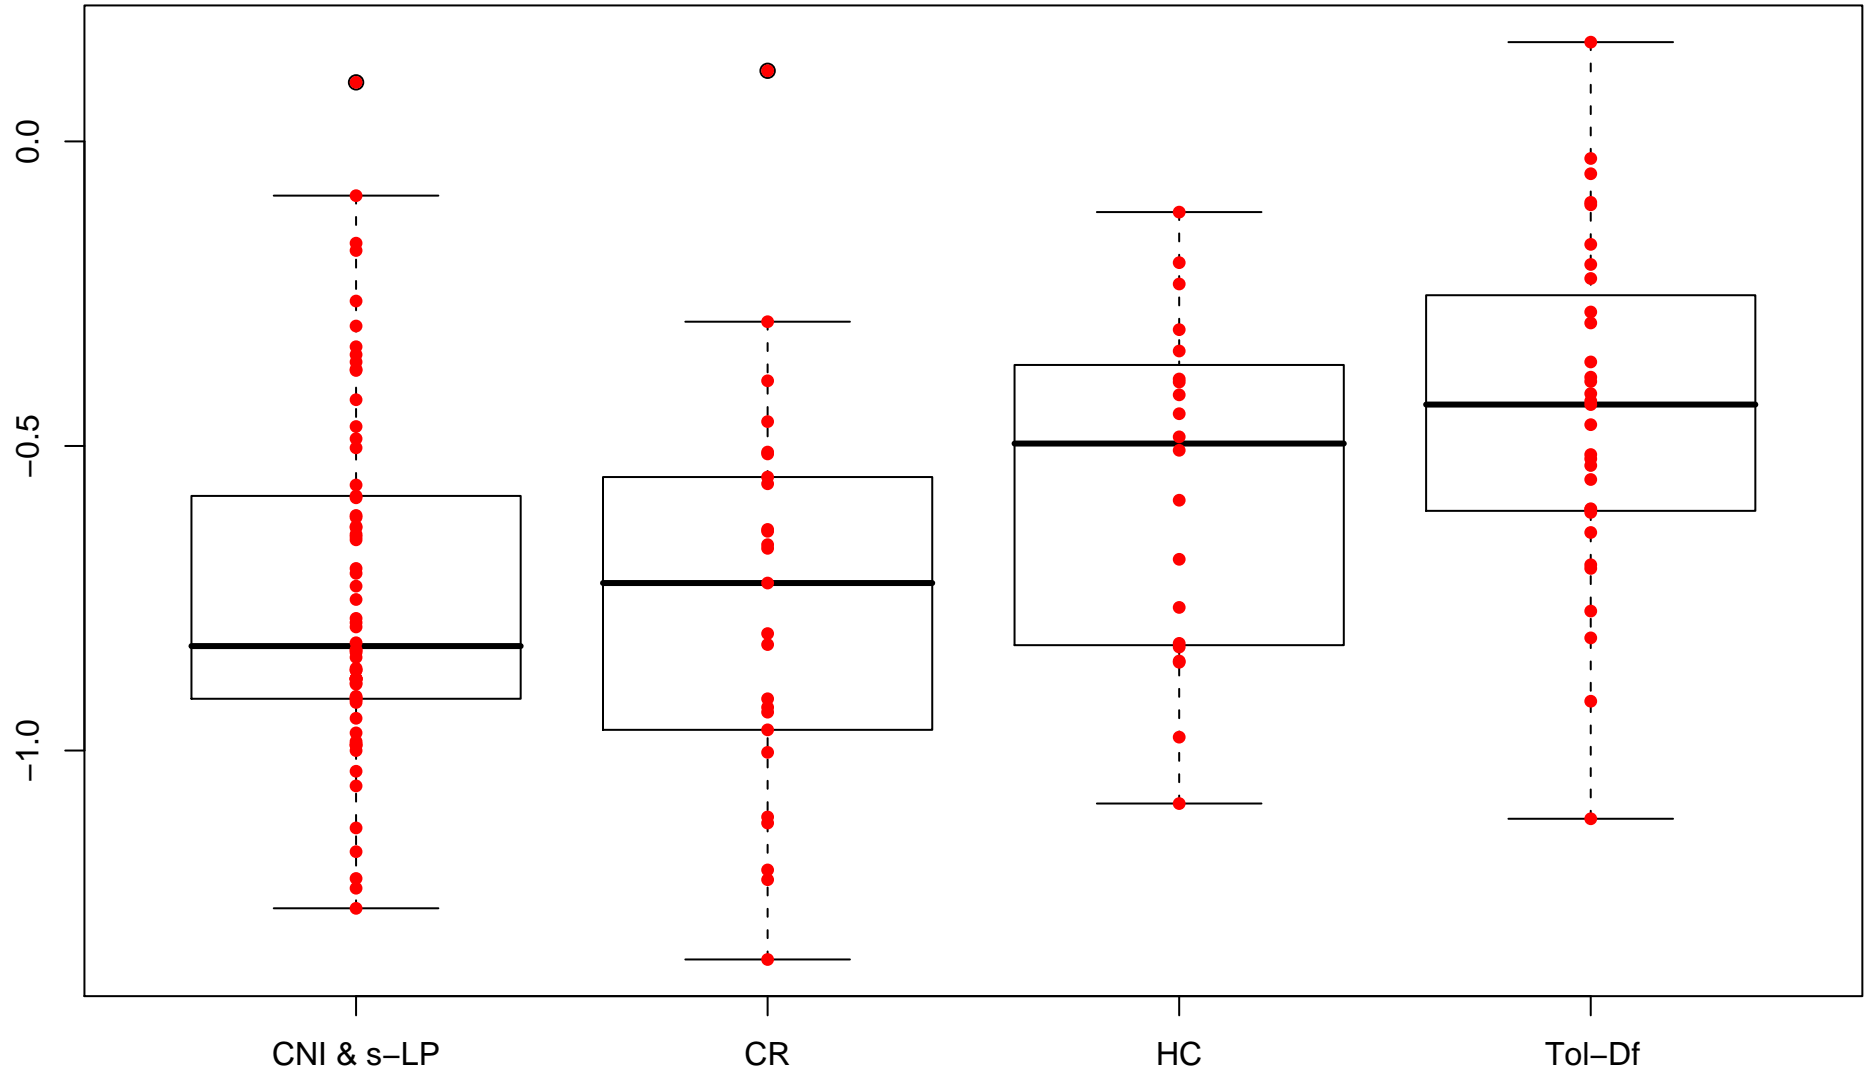

Rank 308 : RASGRP4  
3.575e-05

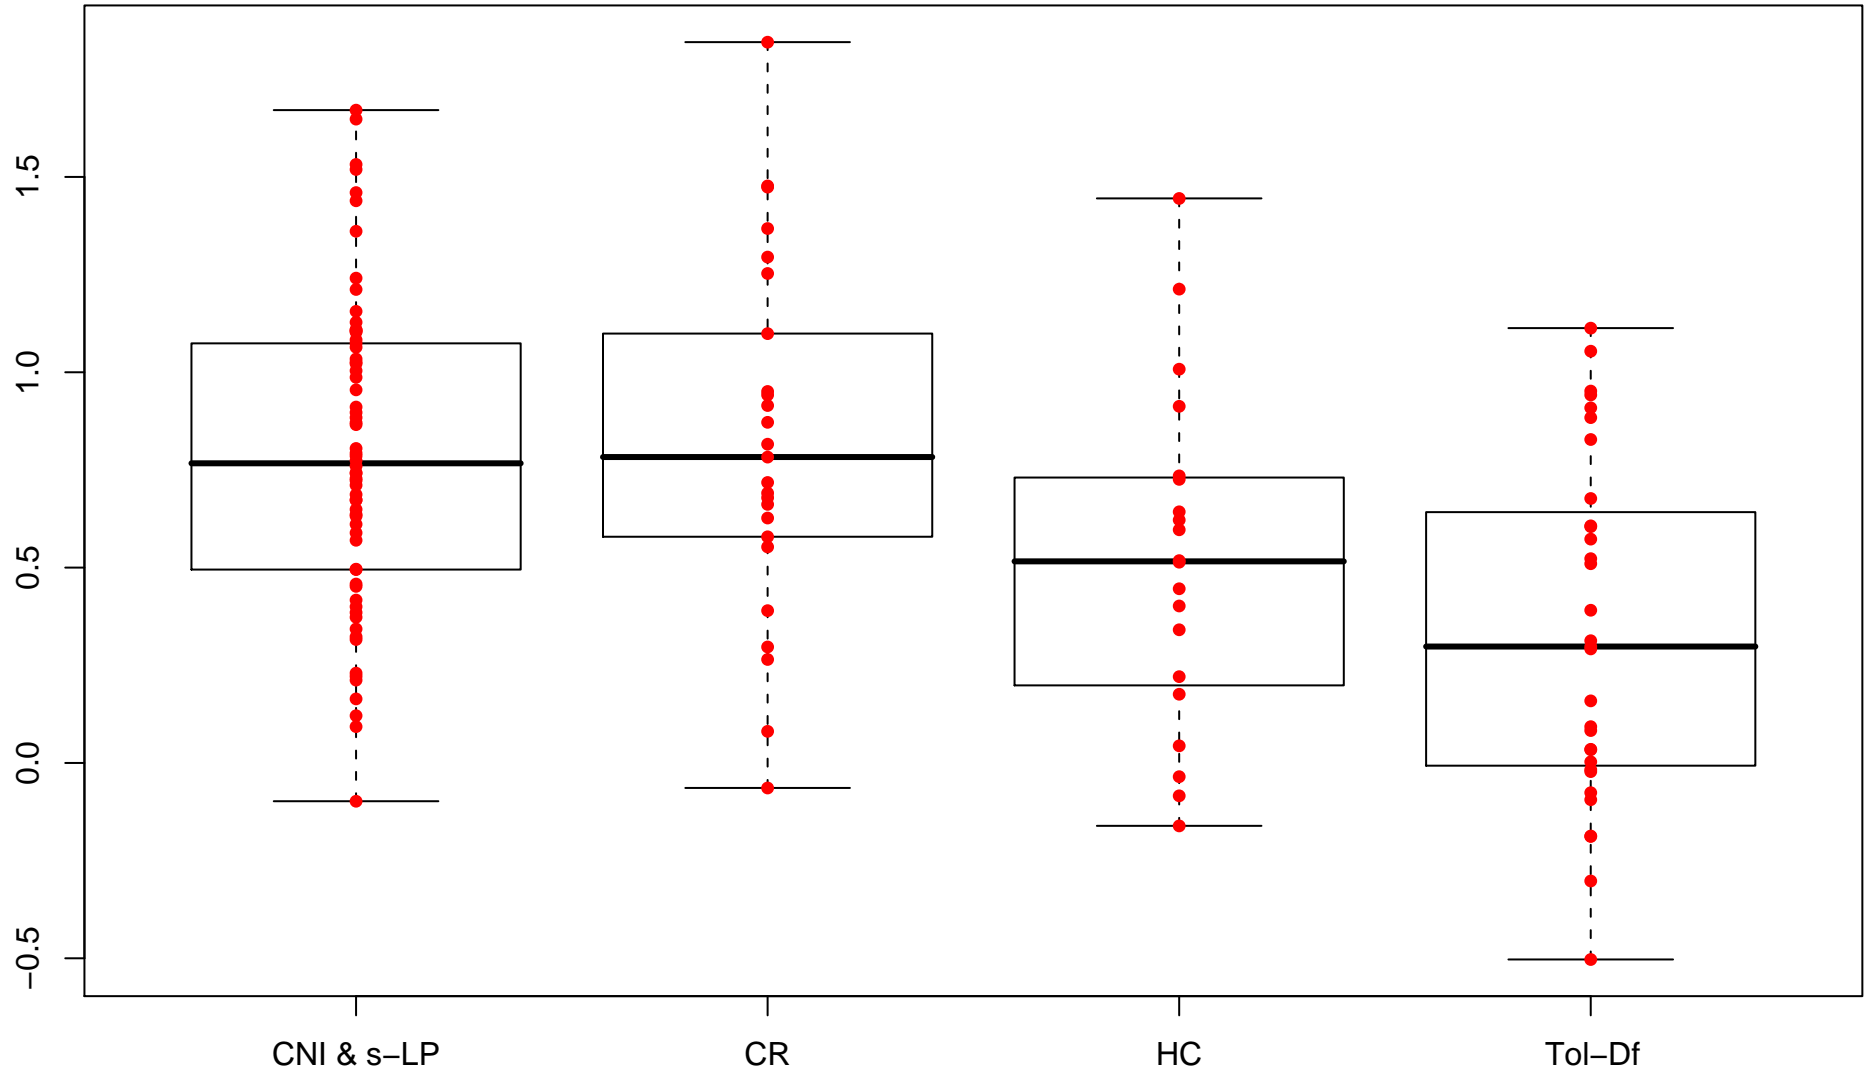

Rank 309 : PCTK1  
3.759e-05

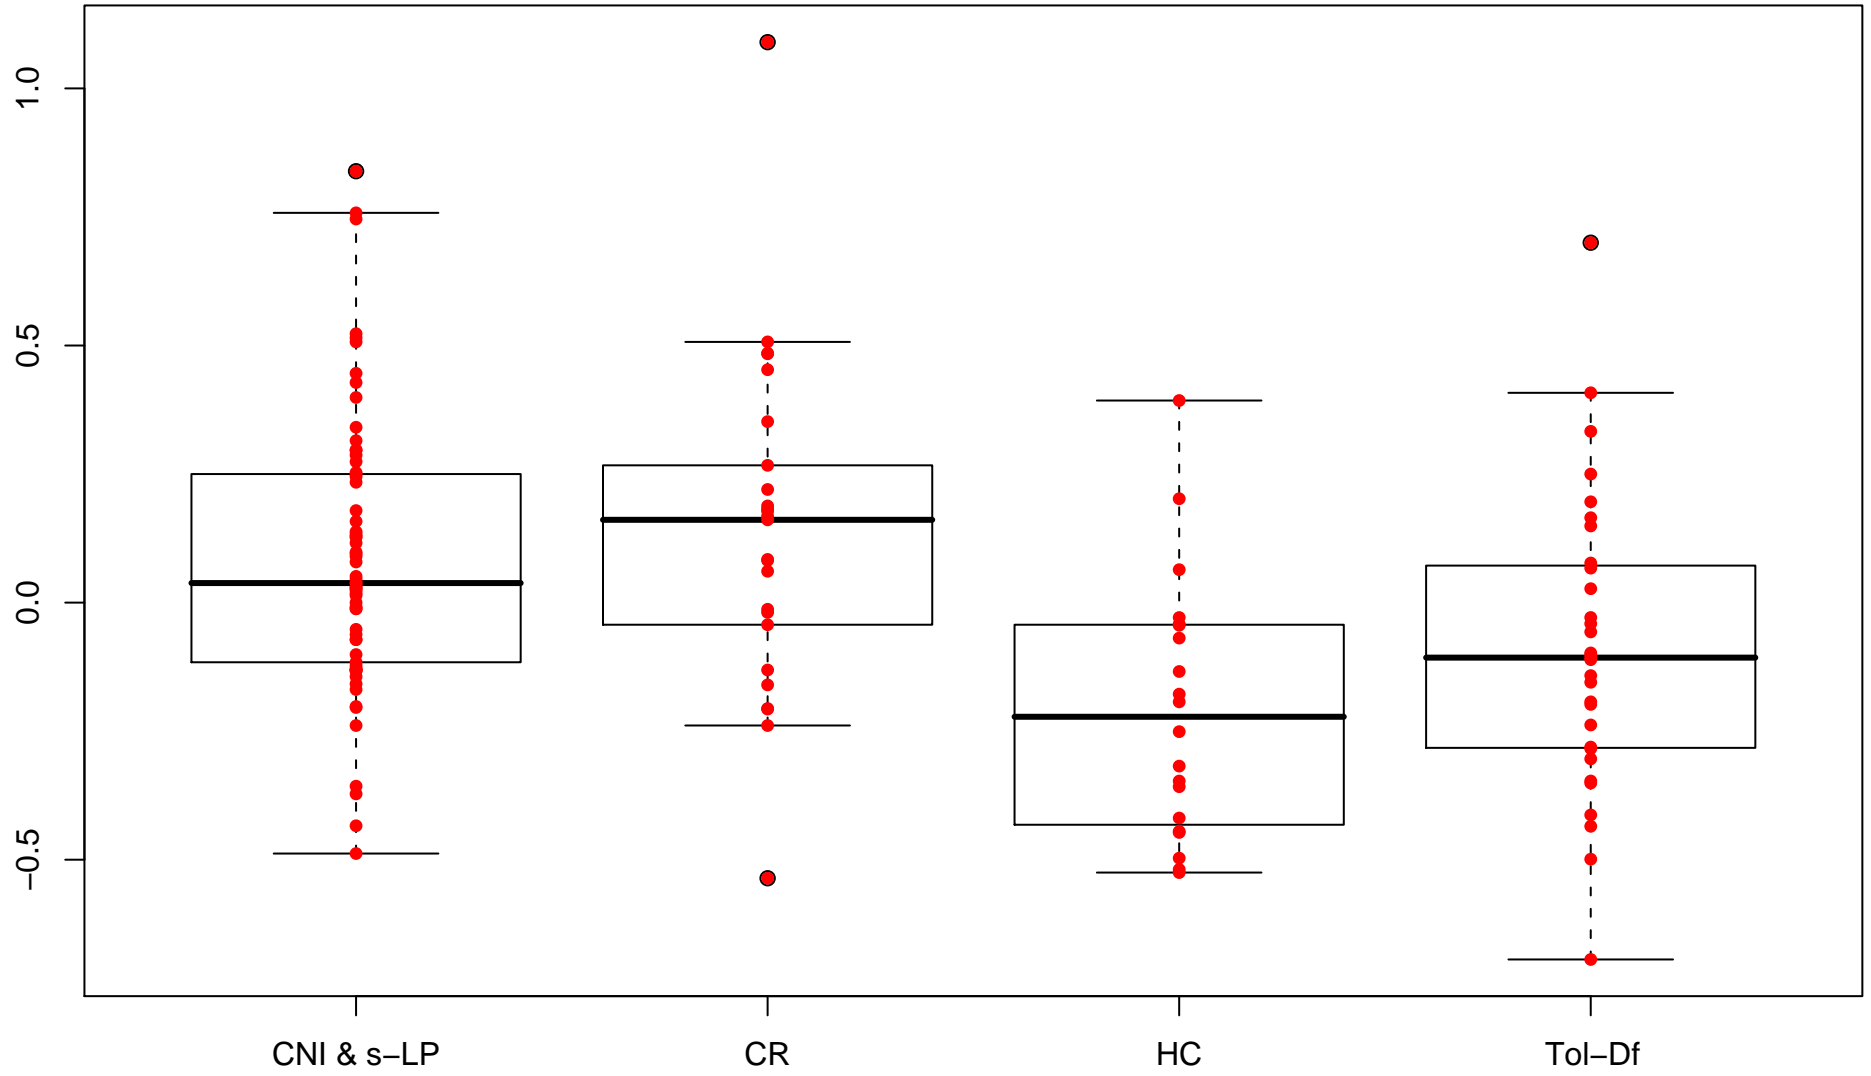

Rank 310 : THAP2  
3.97e-05

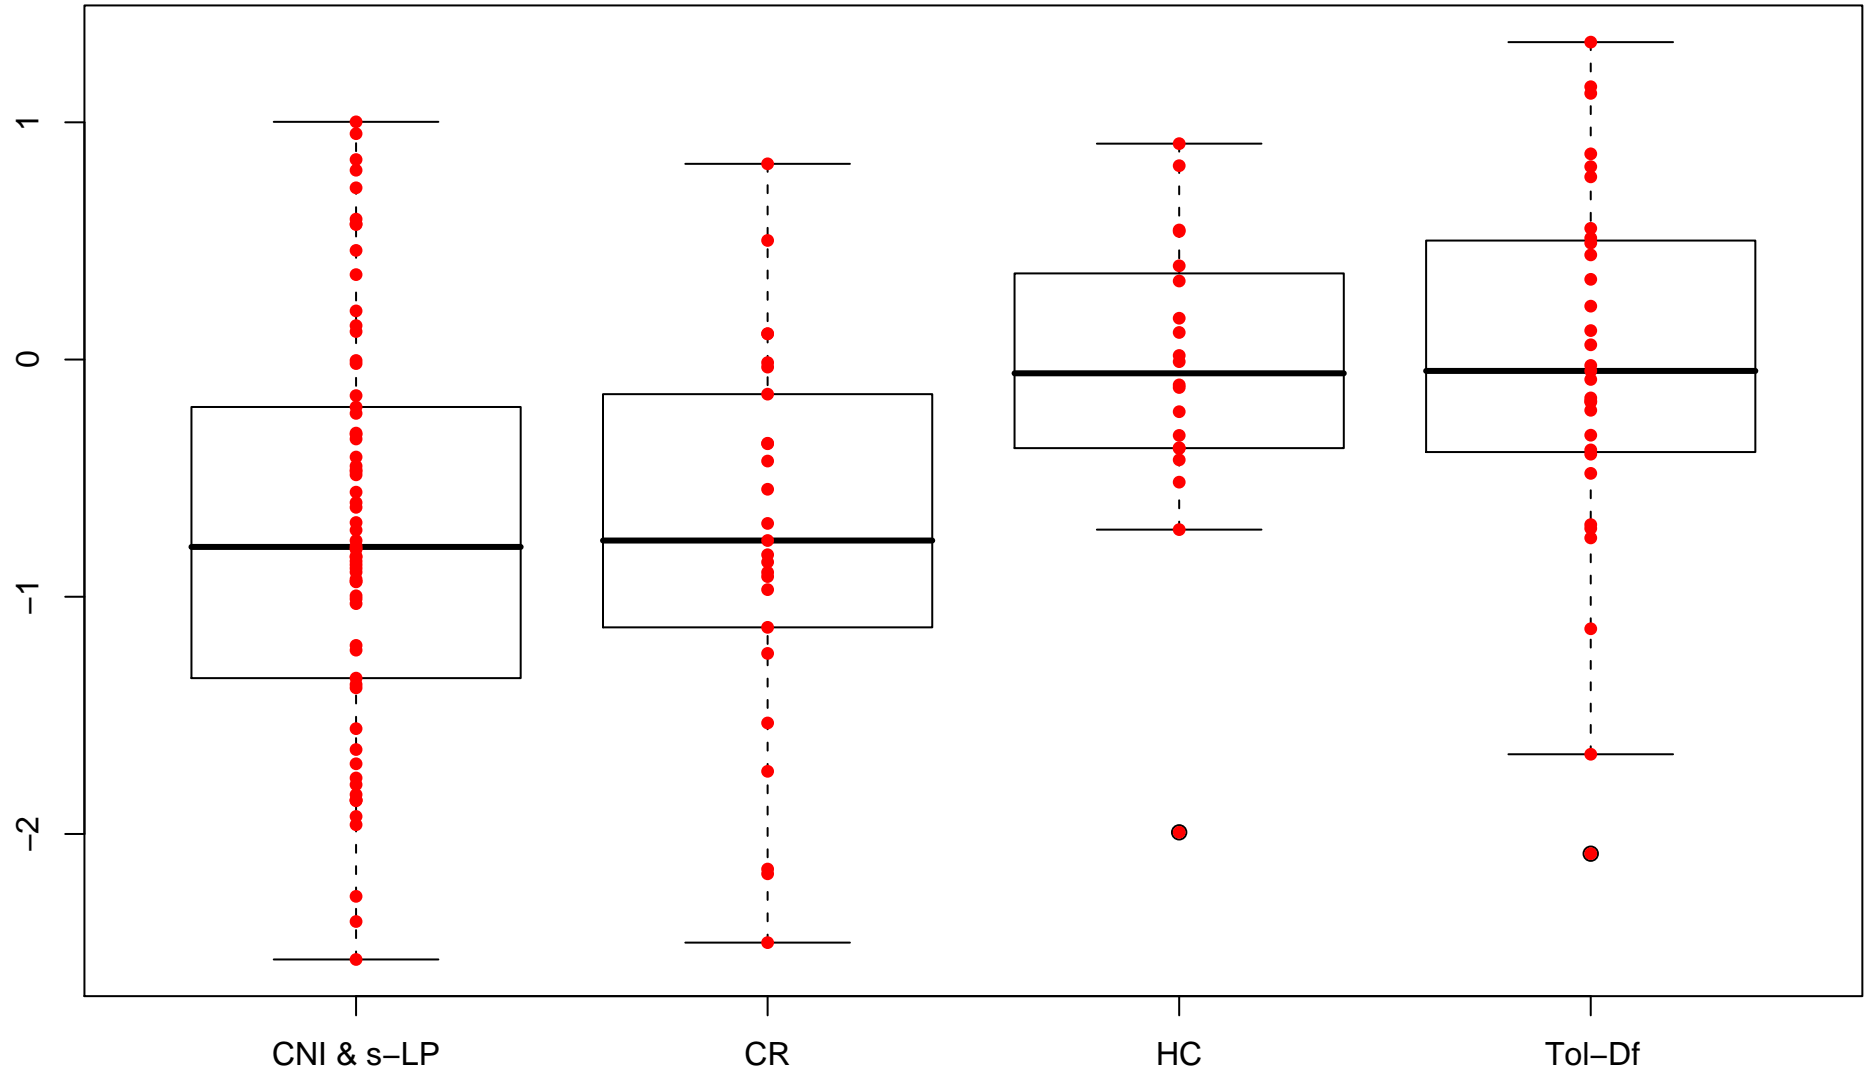

Rank 311 : CTSB  
4.079e-05

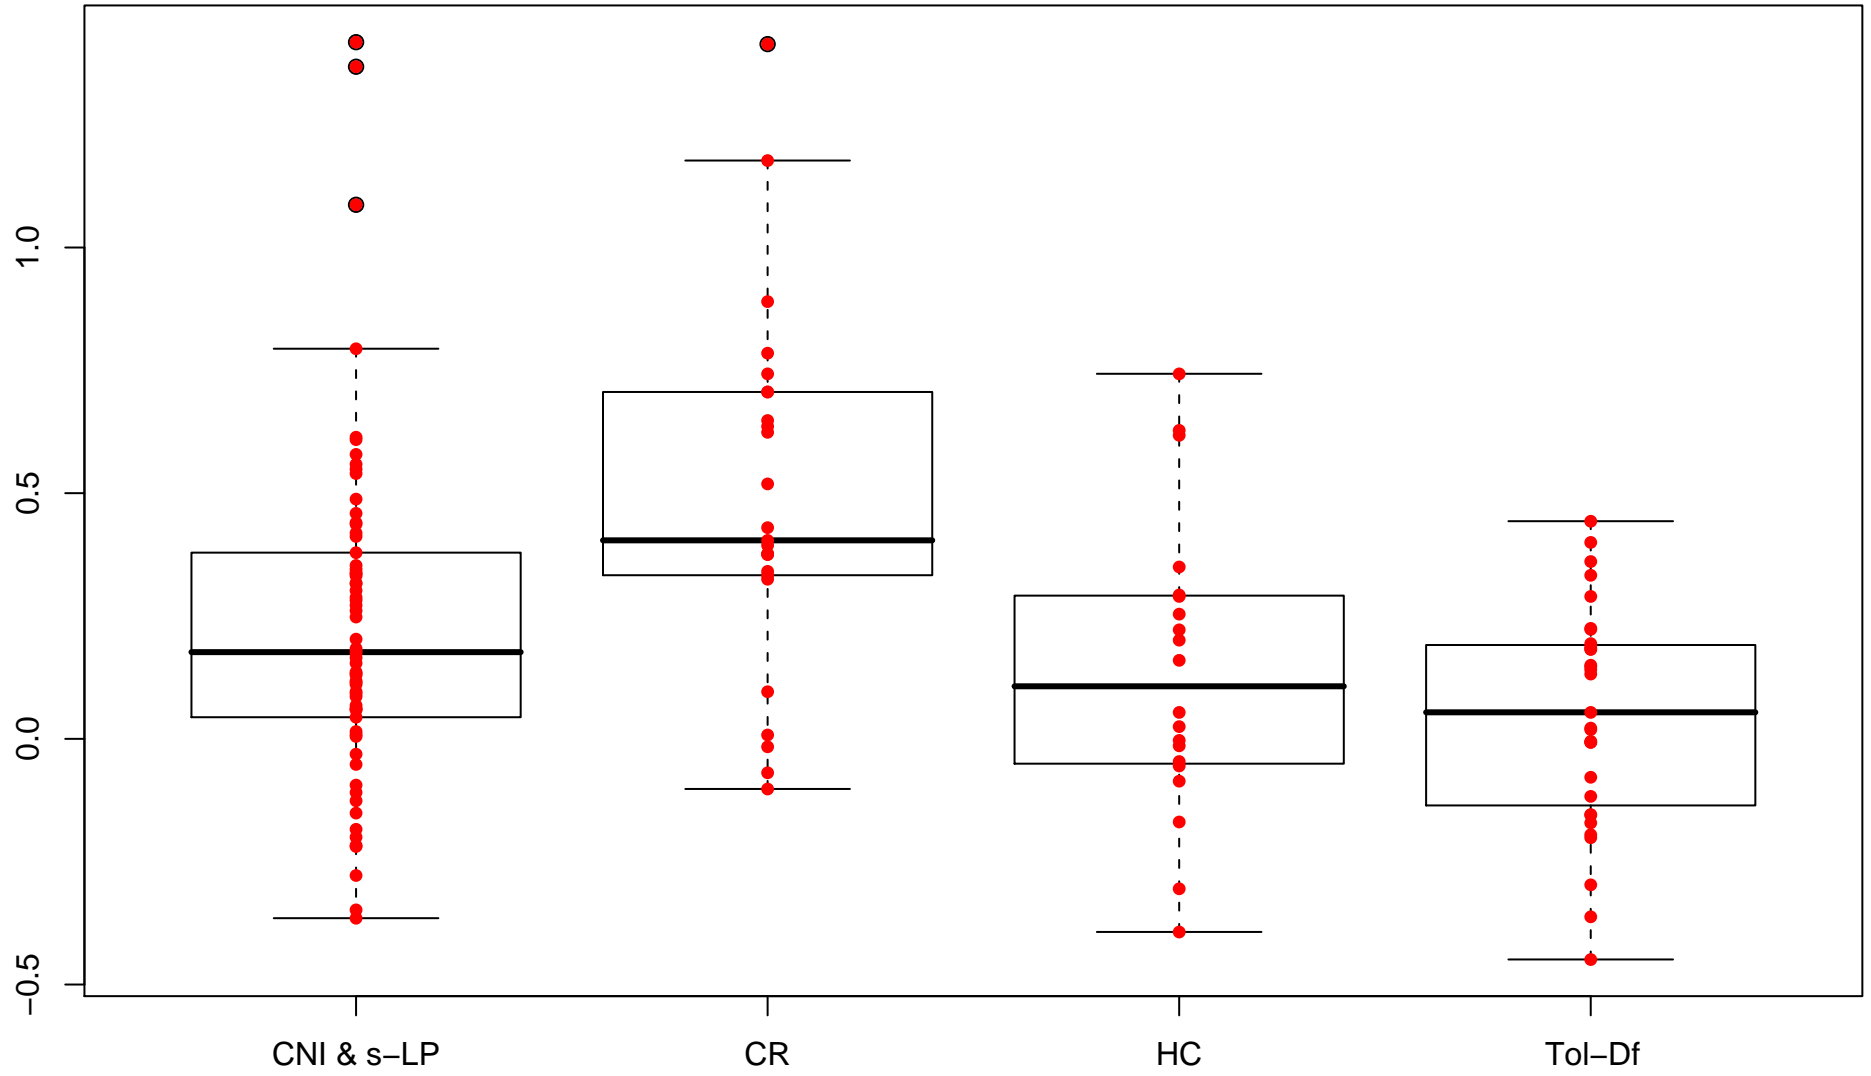



Rank 312 : TRA@  
4.096e-05

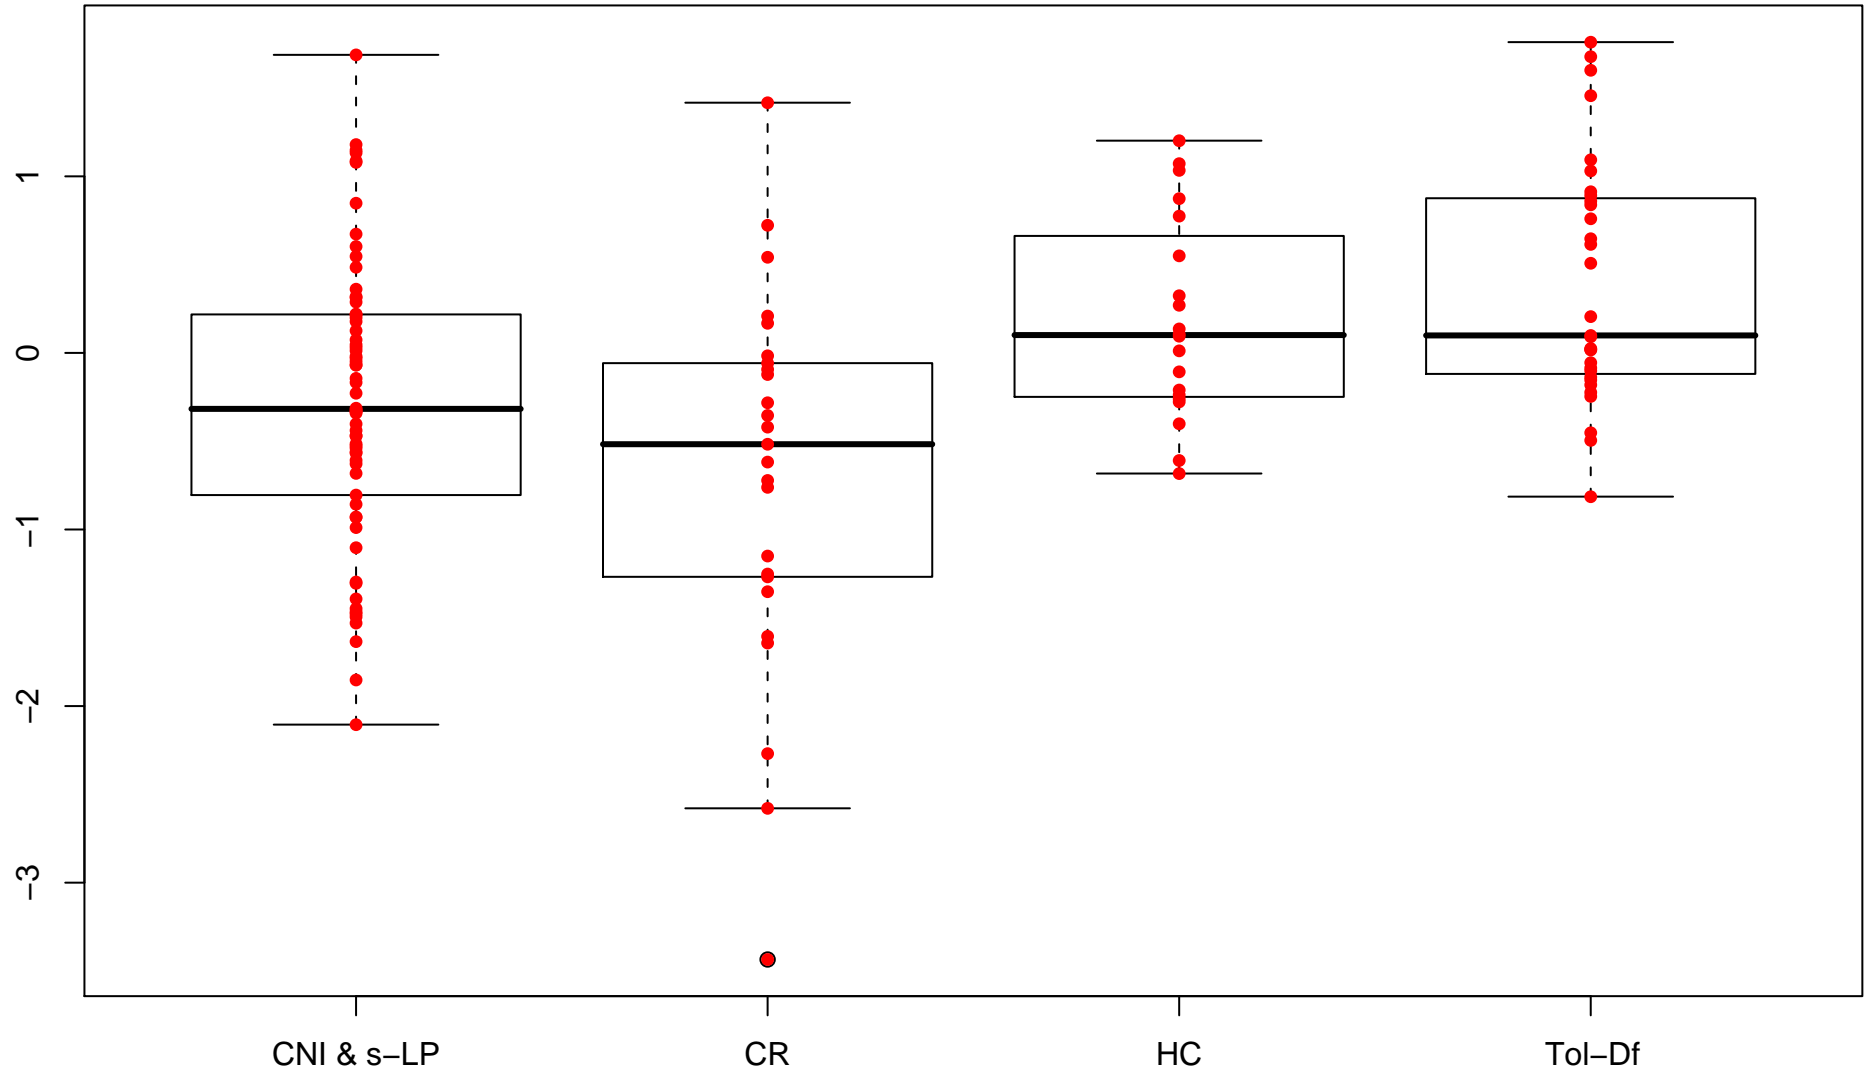

Rank 313 : ATP8A2  
4.17e-05

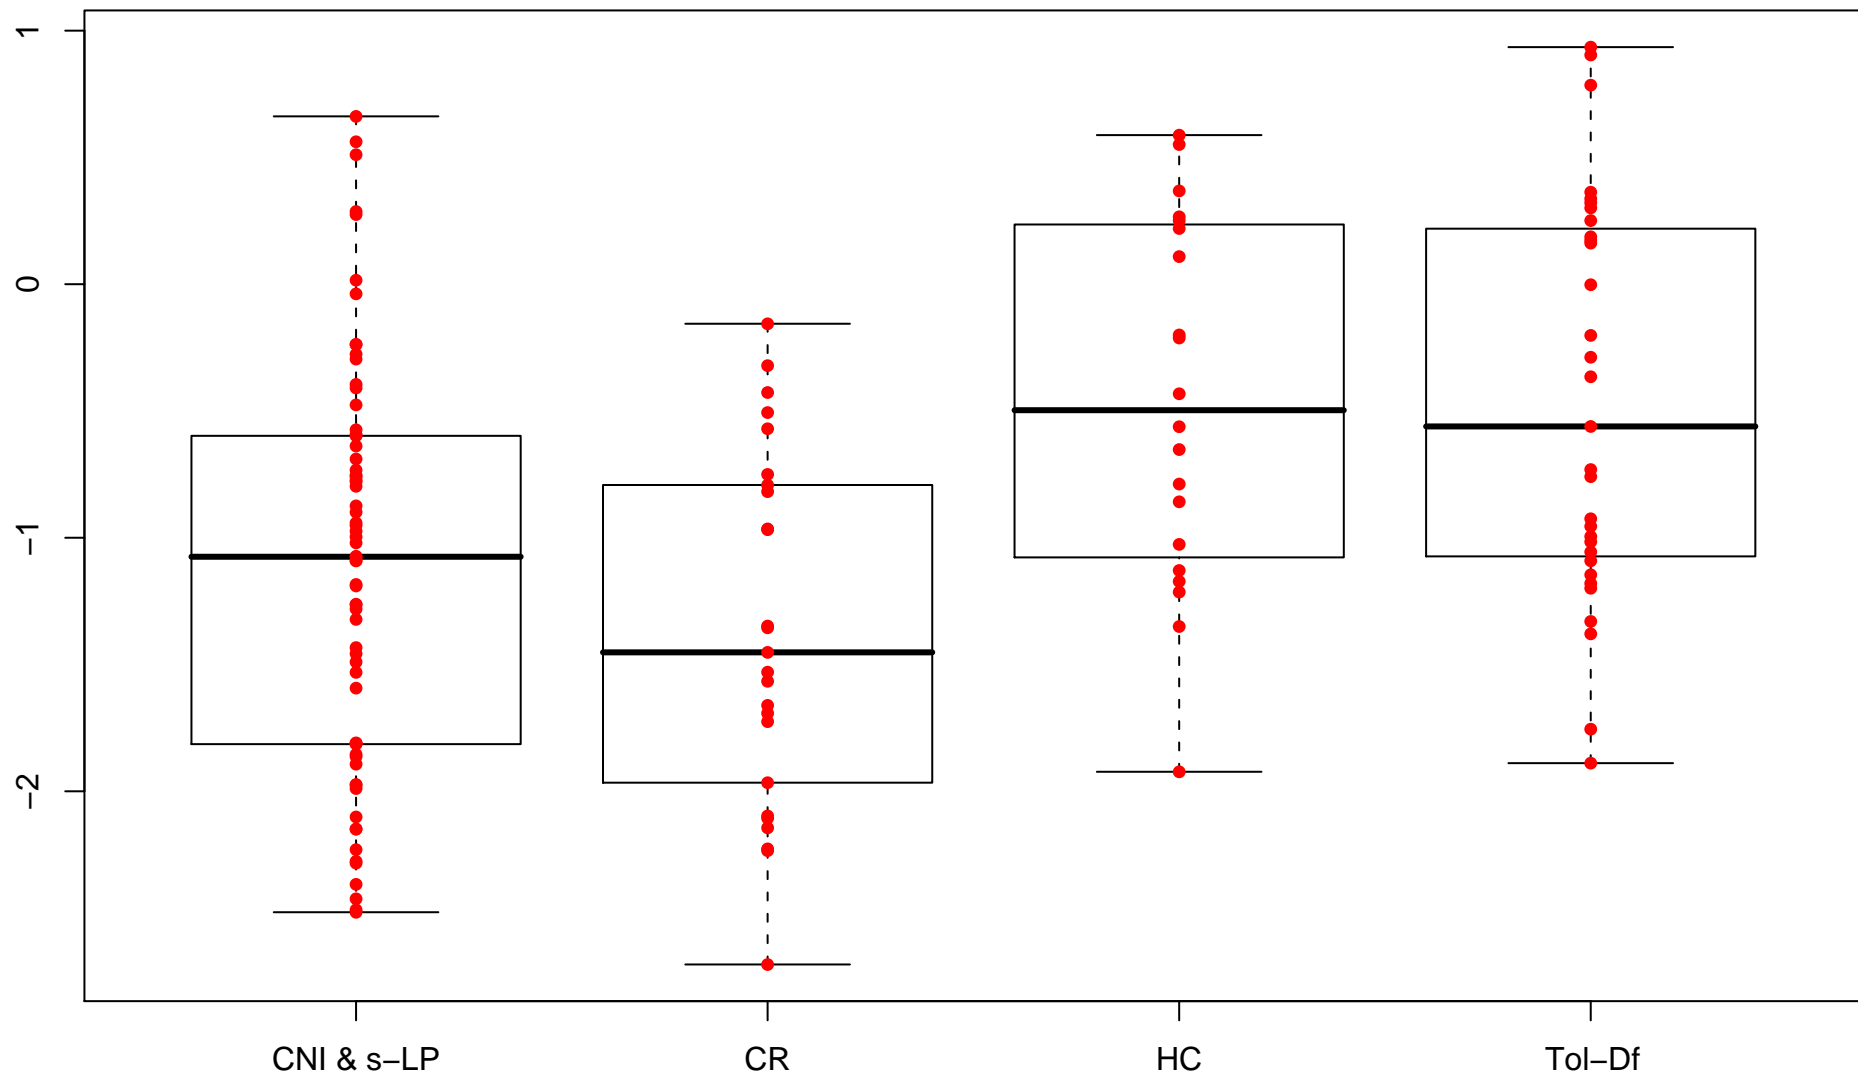

Rank 314 : UBE2T  
4.178e-05

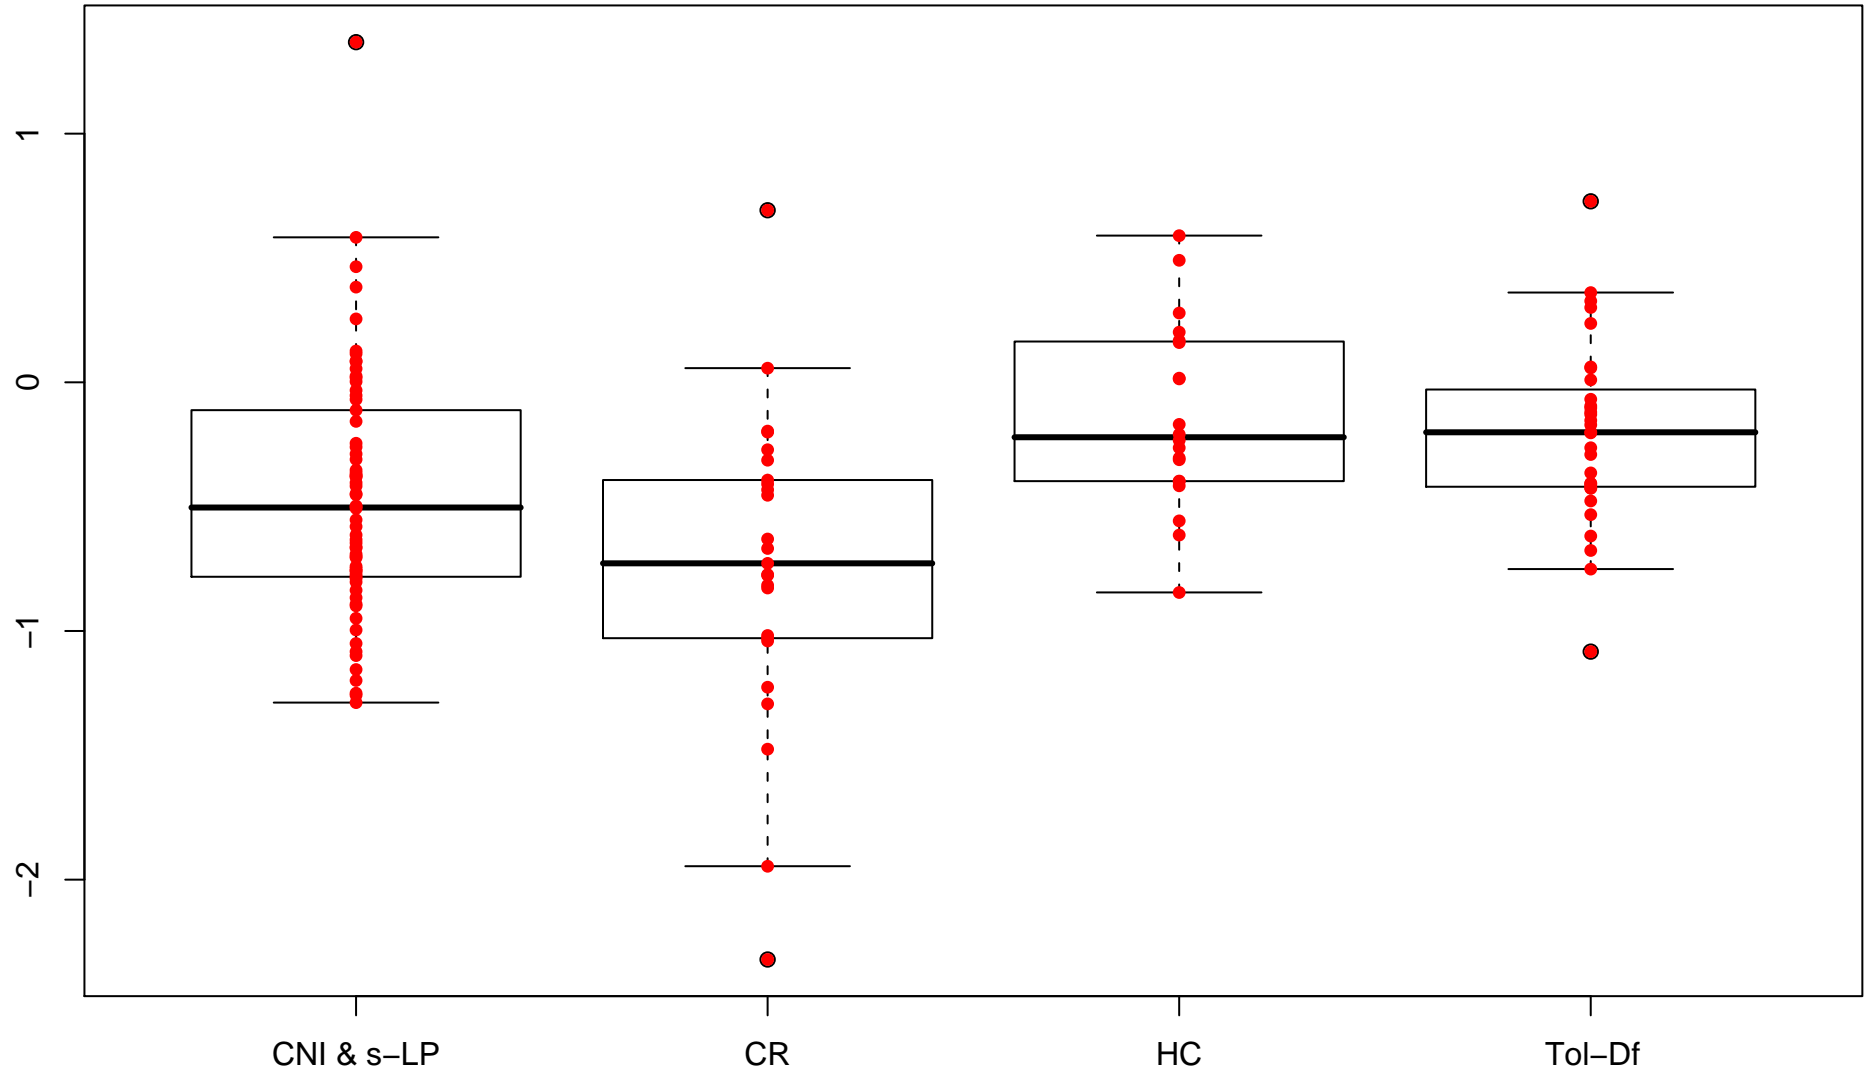

Rank 315 : LTF  
4.186e-05

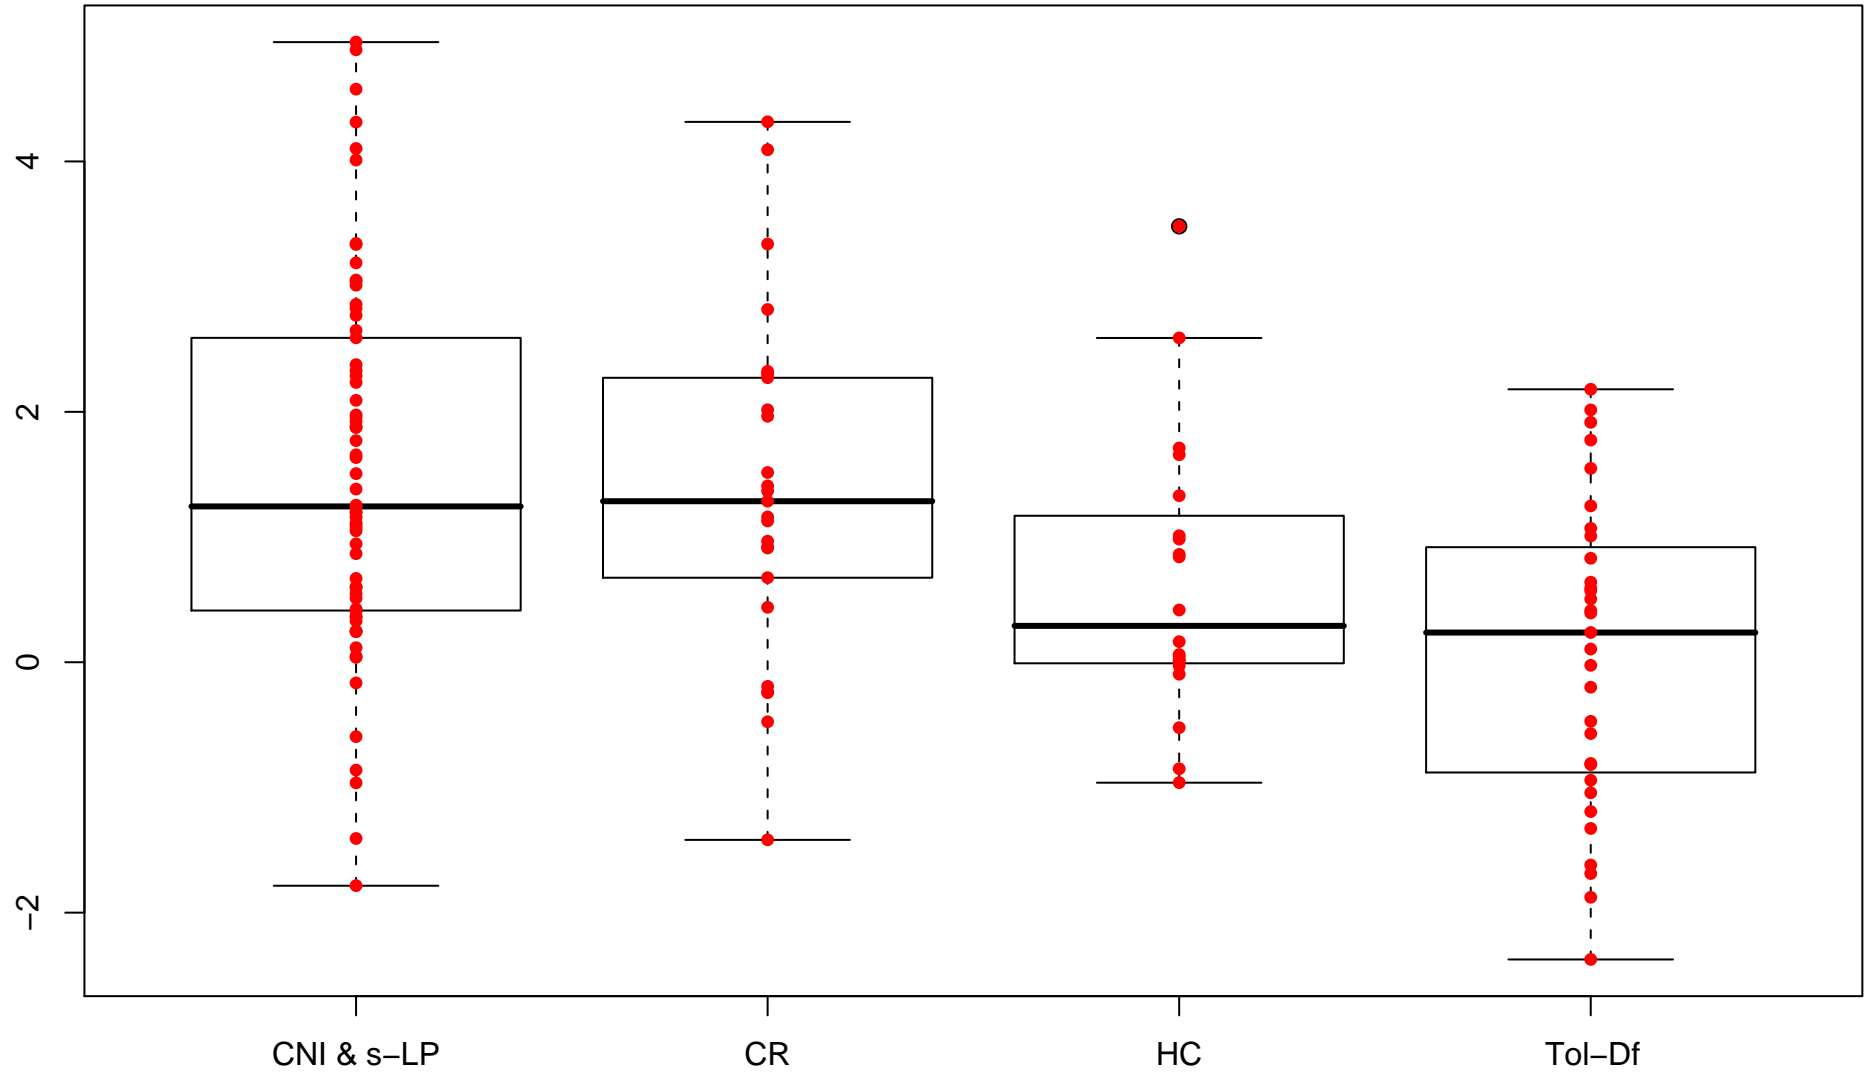

Rank 316 : AKAP2  
4.231e-05

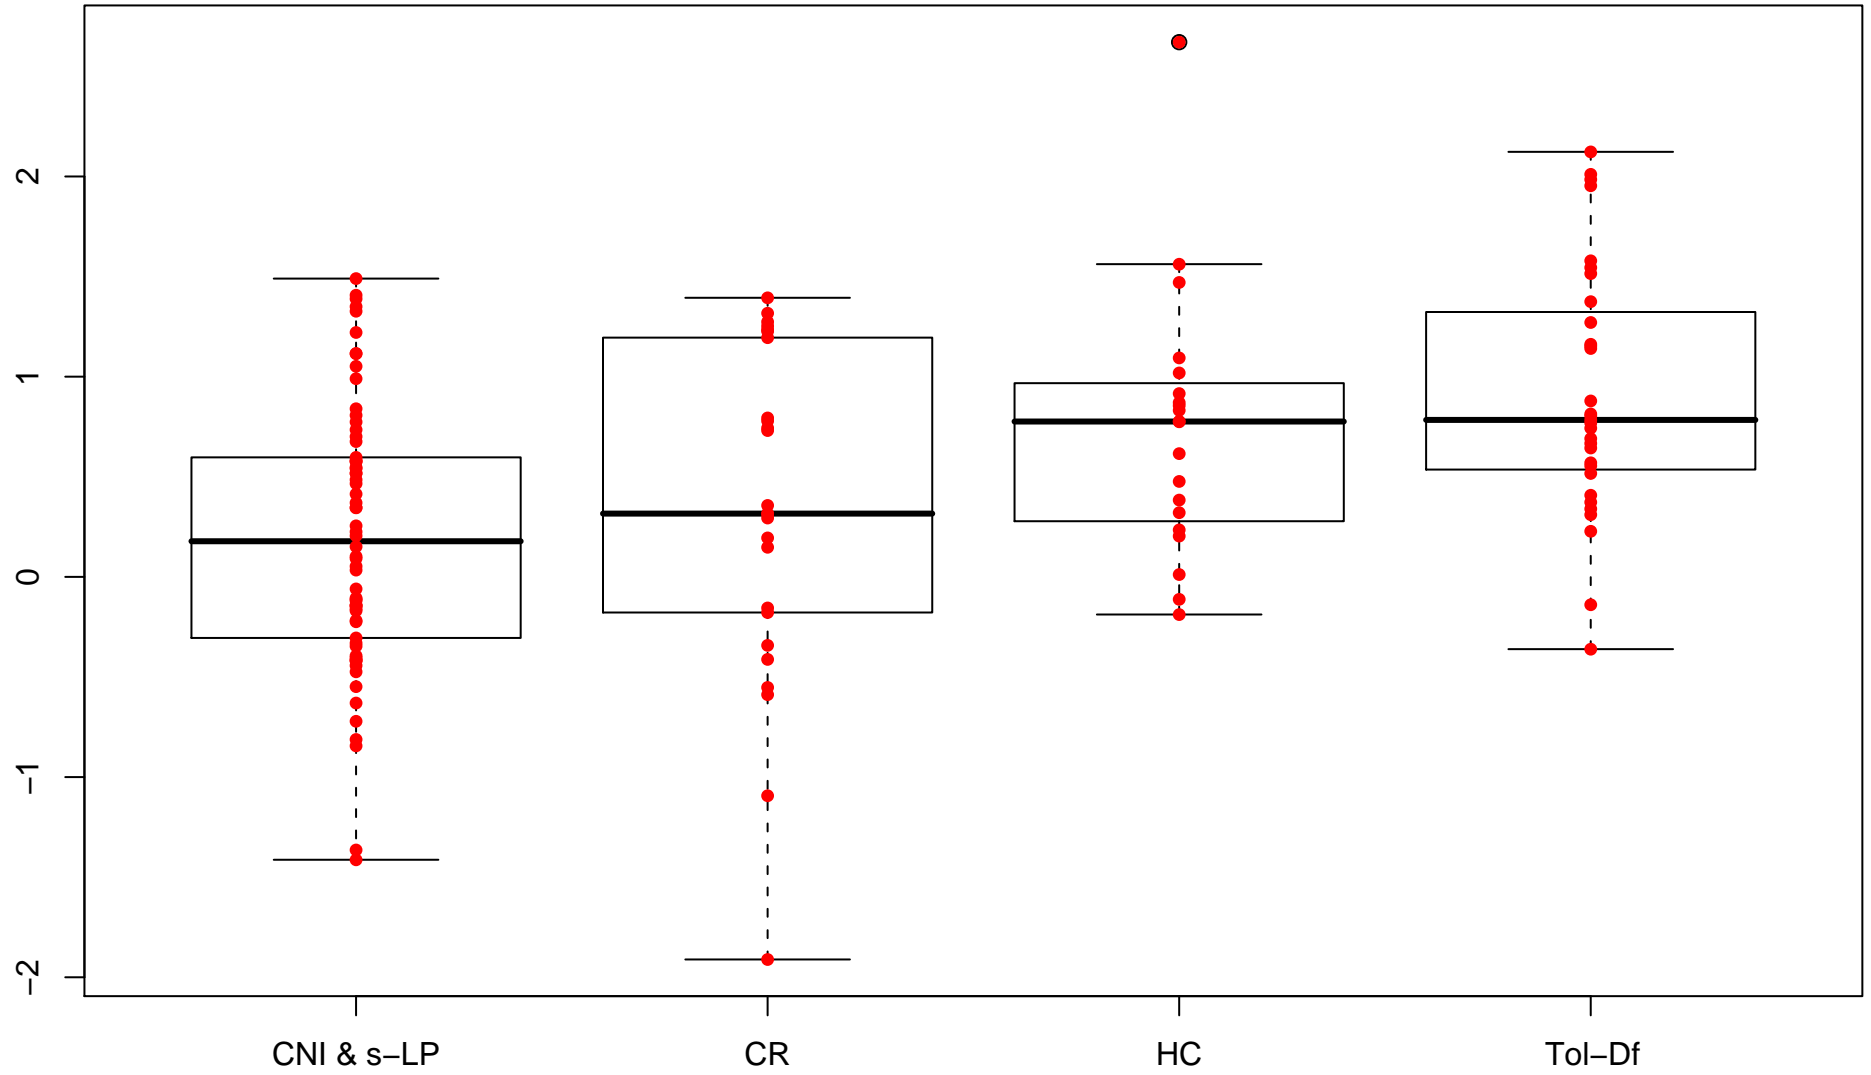

Rank 317 : THUMPD1  
4.327e-05

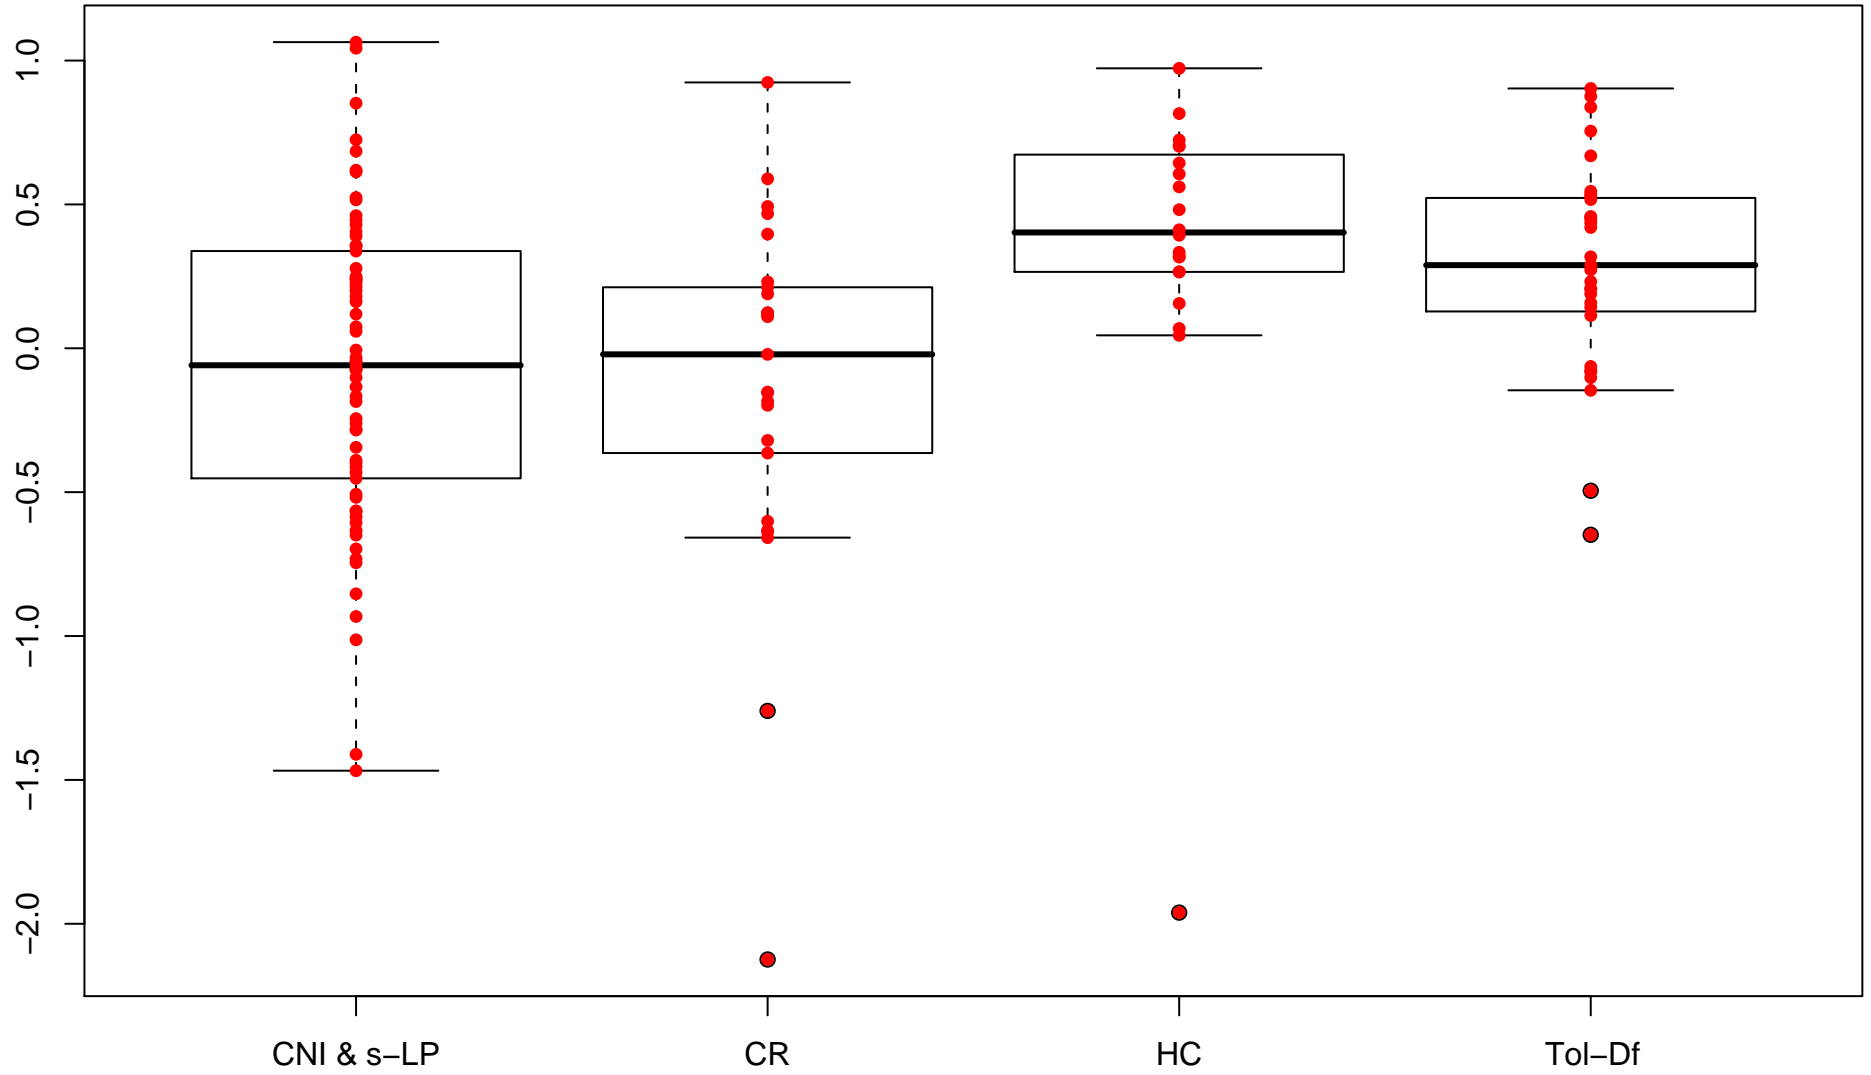

Rank 318 : FCGR1A  
4.445e-05

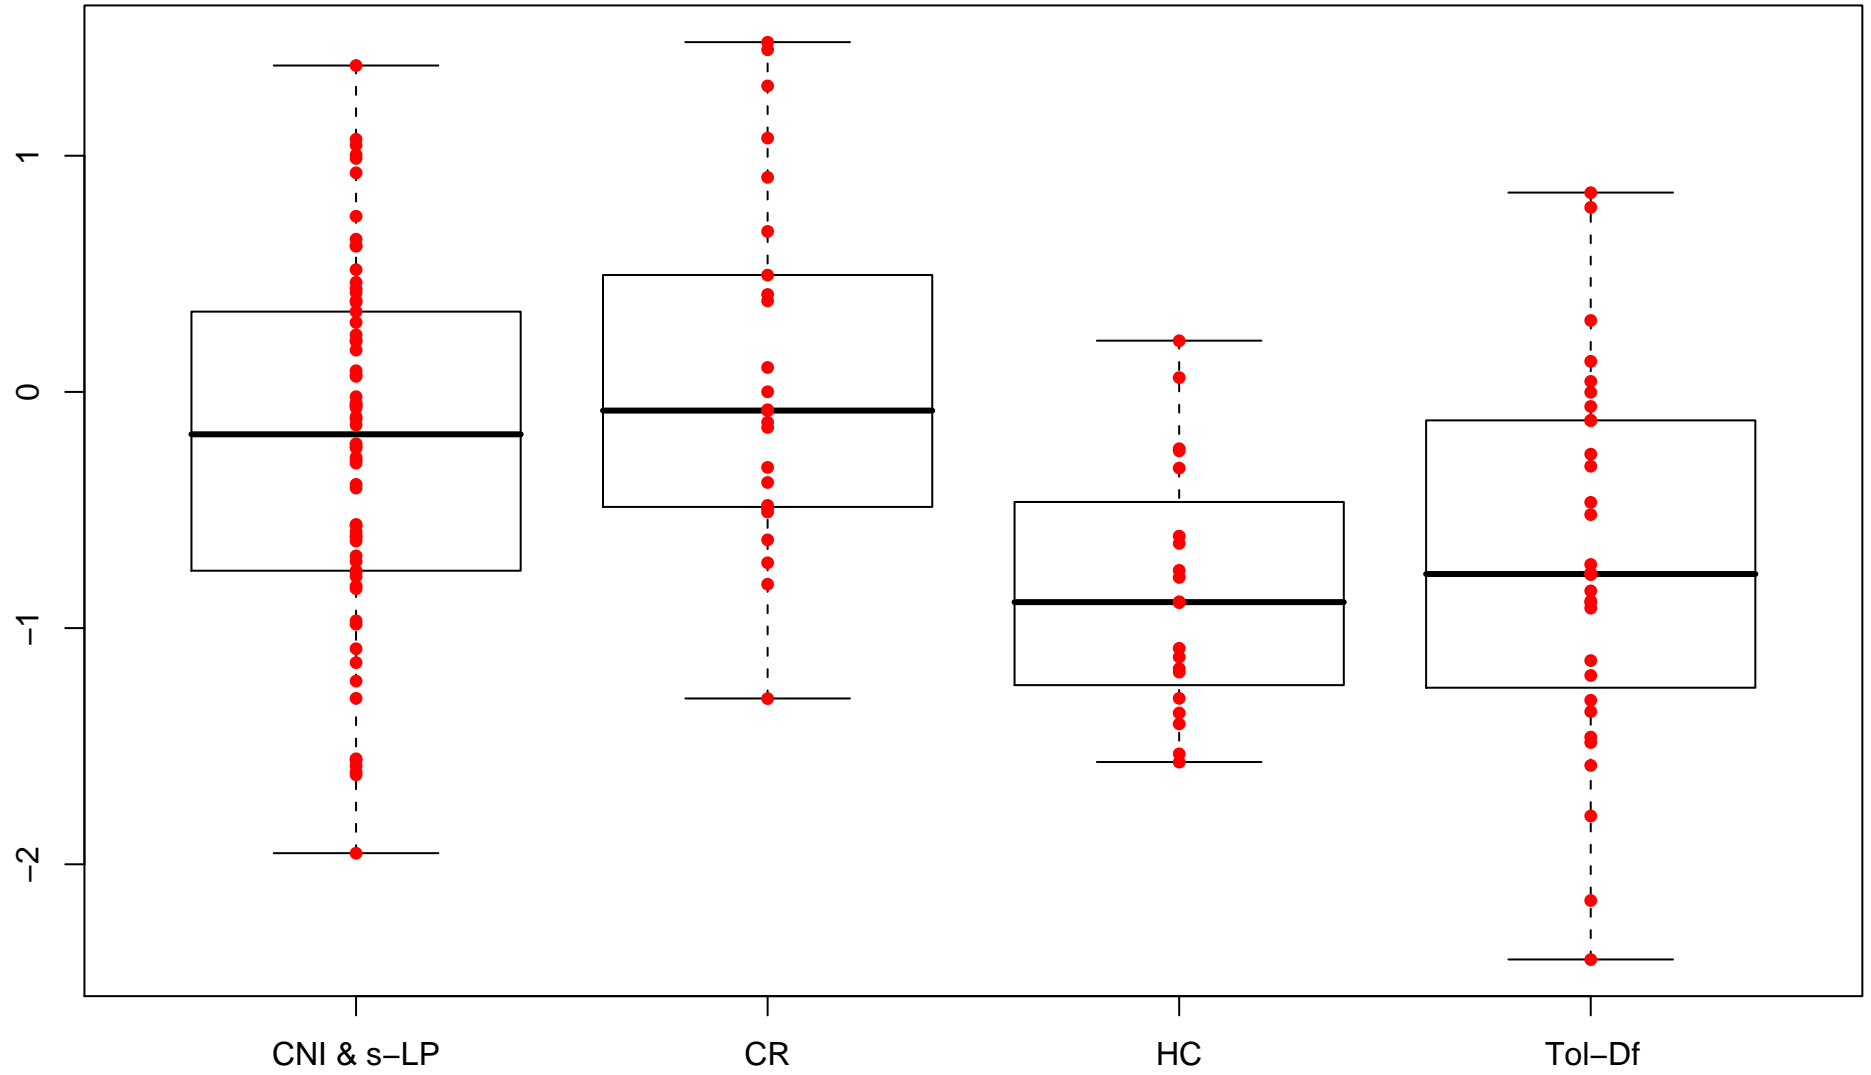

Rank 319 : RETN  
4.534e-05

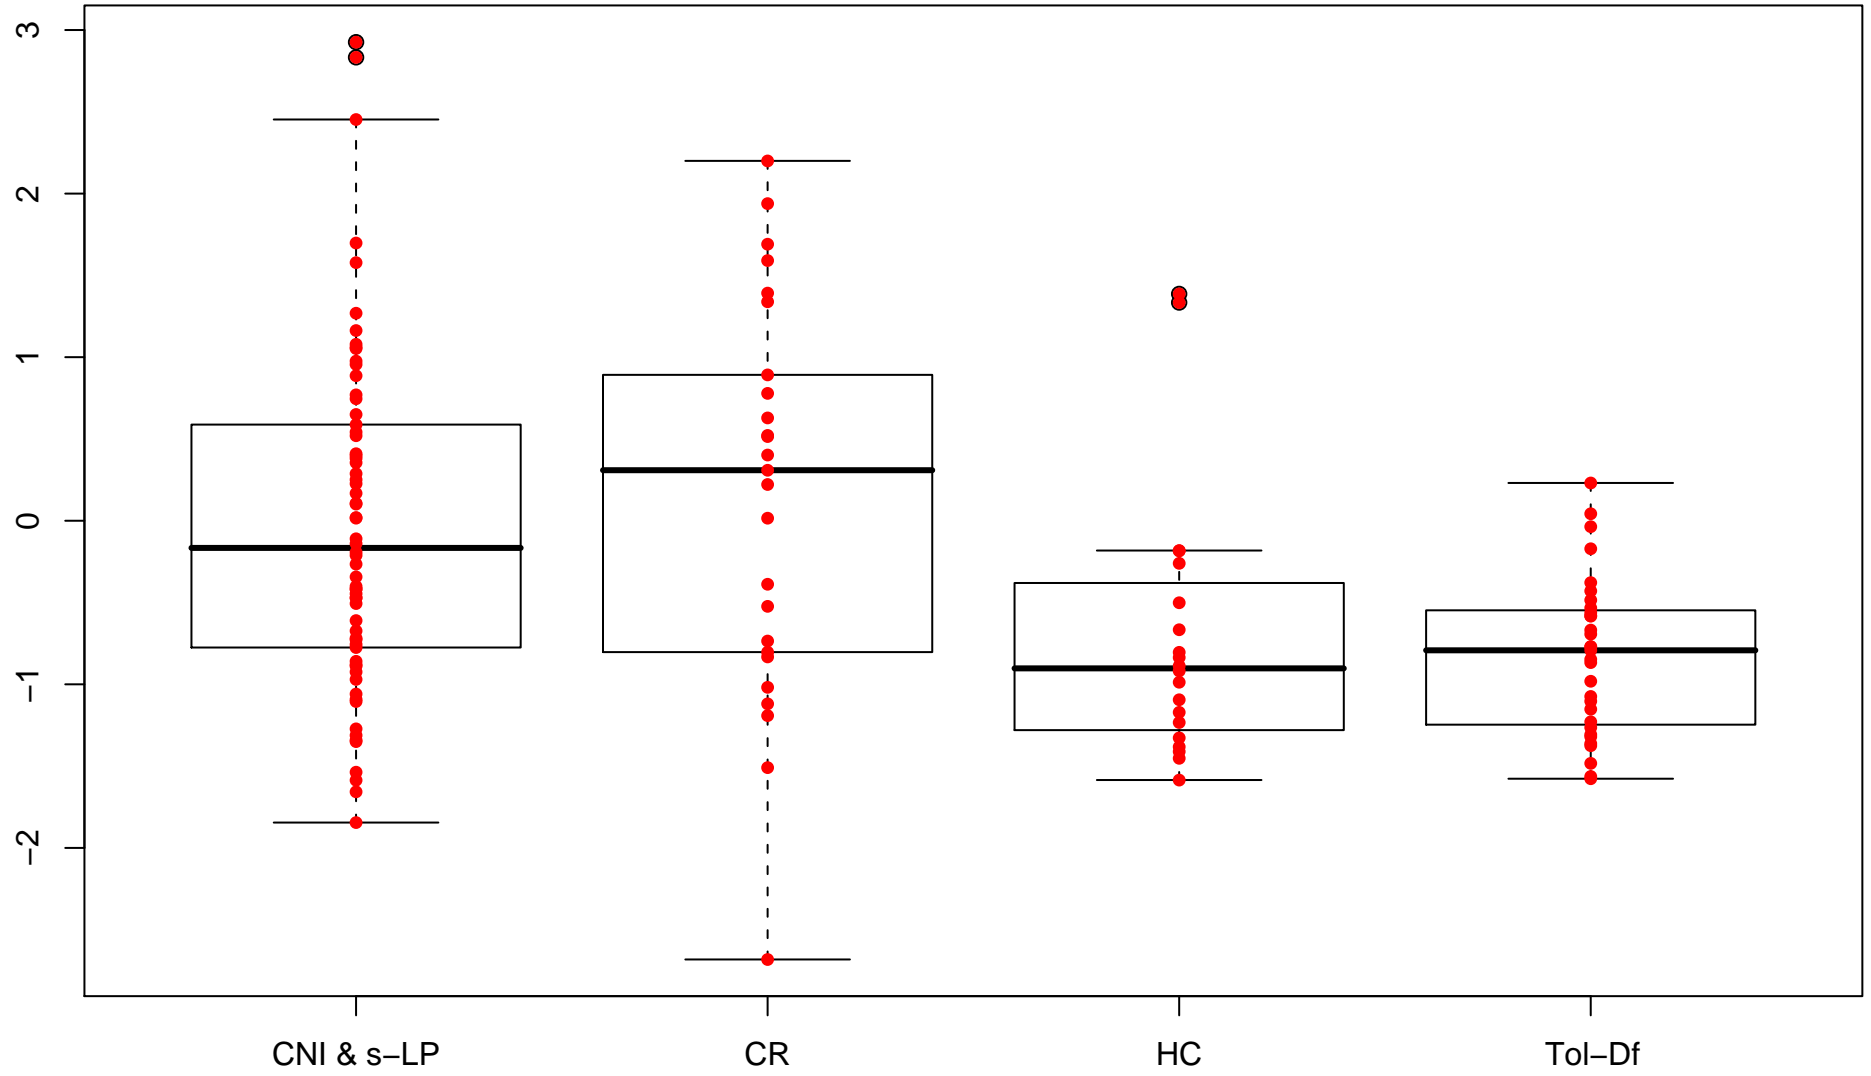



Rank 320 : NUDCD2  
4.551e-05

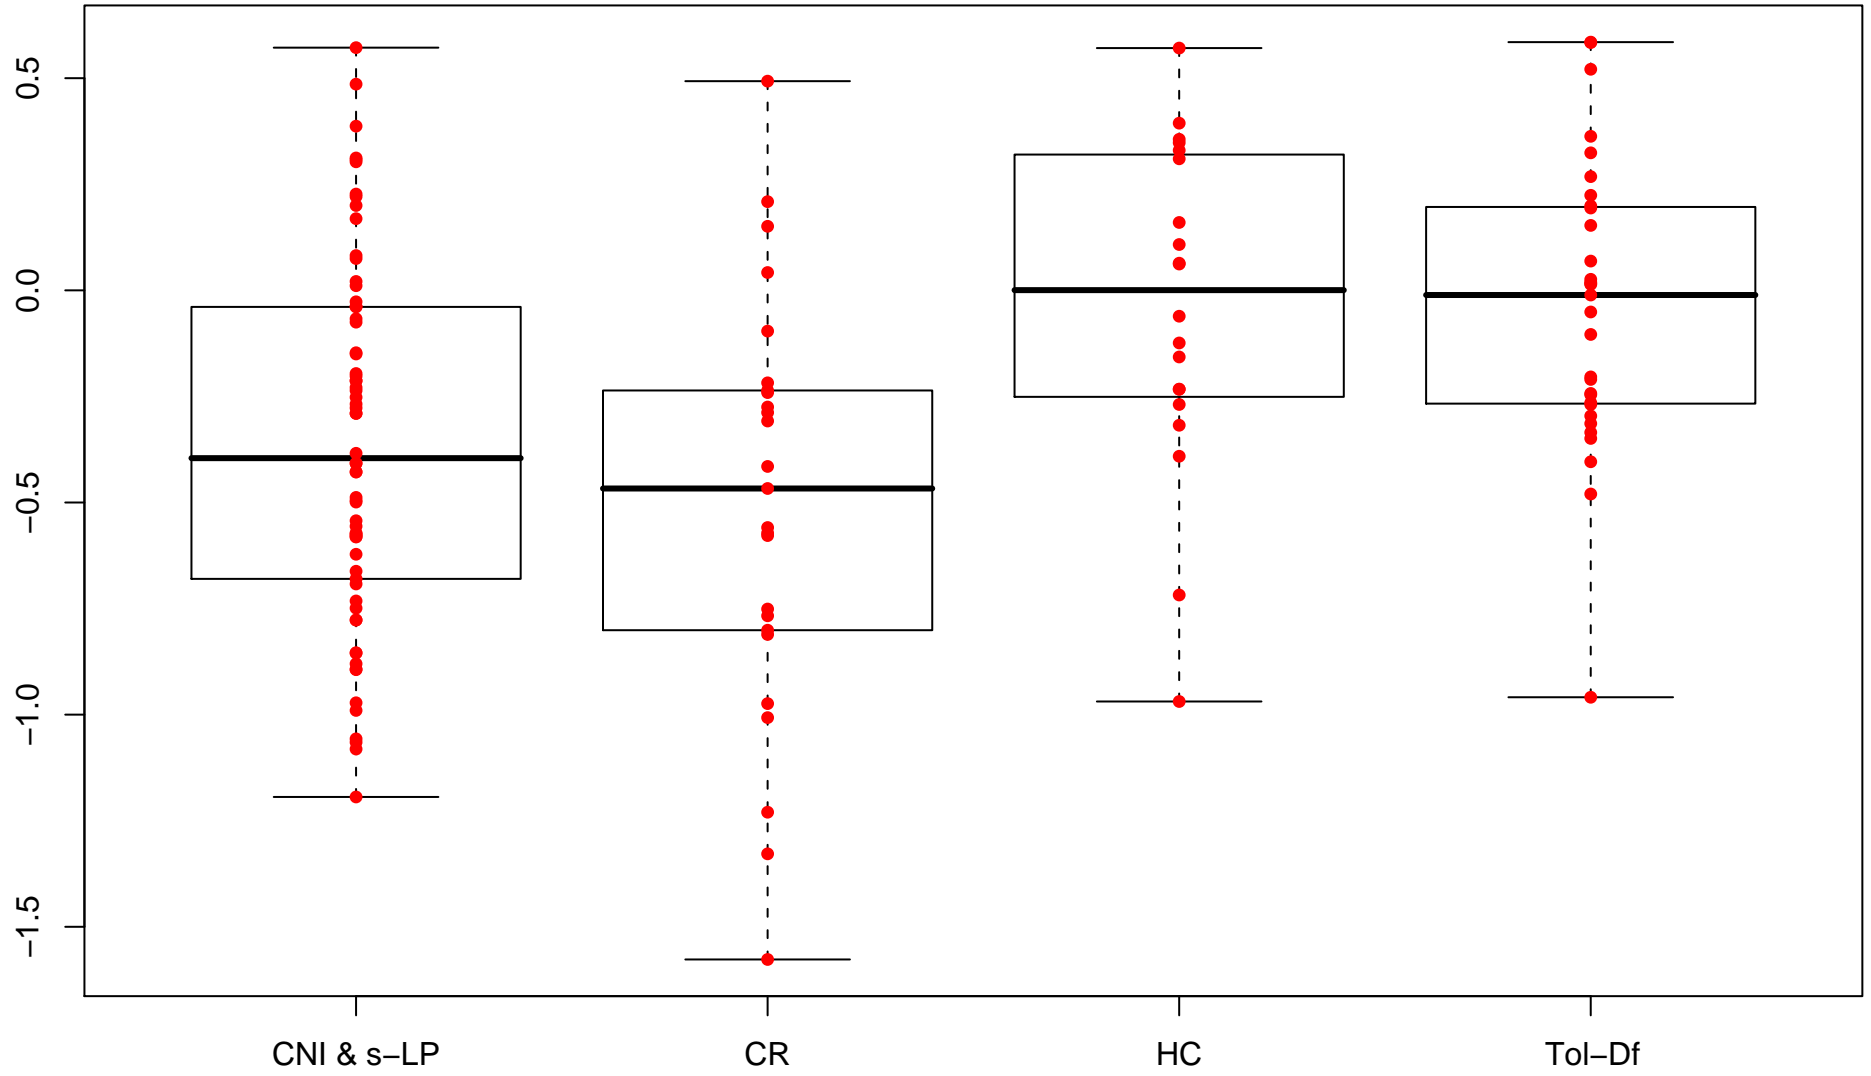

Rank 321 : LOC645638  
4.568e-05

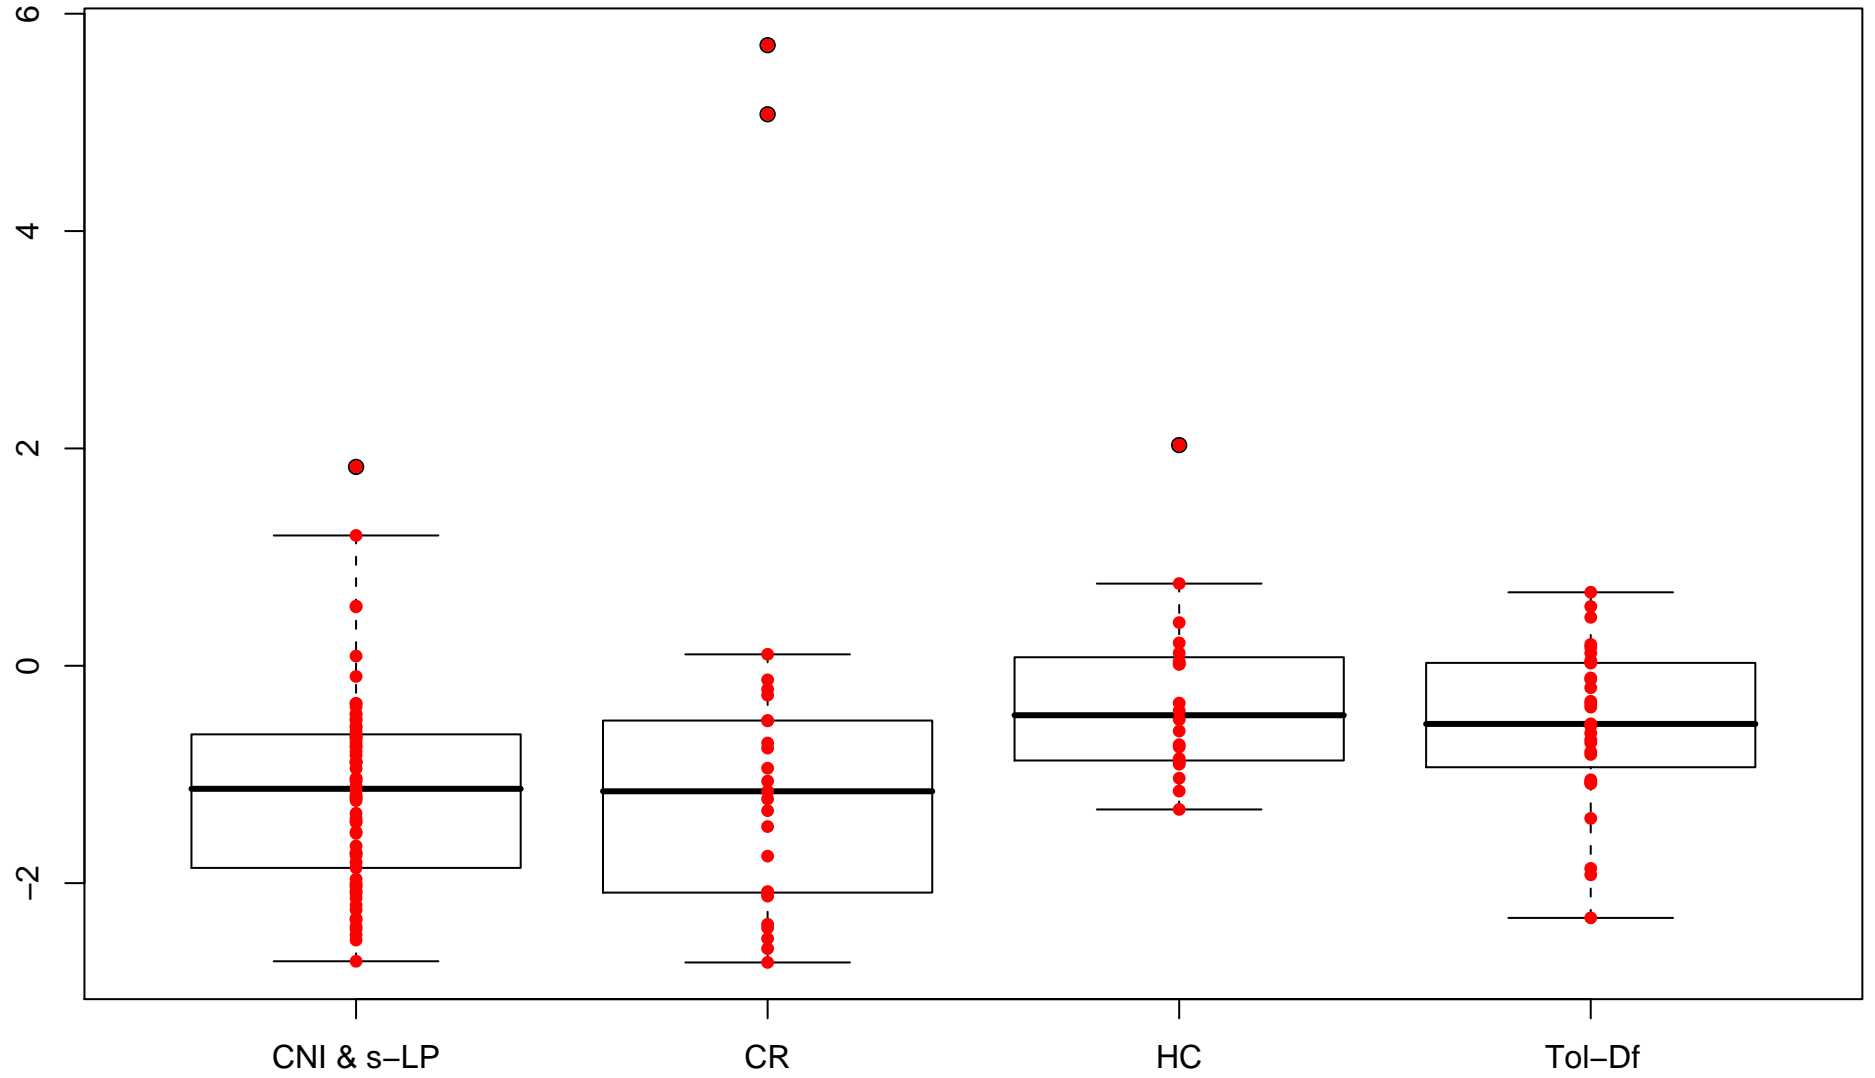

Rank 322 : PTPRCAP  
4.656e-05

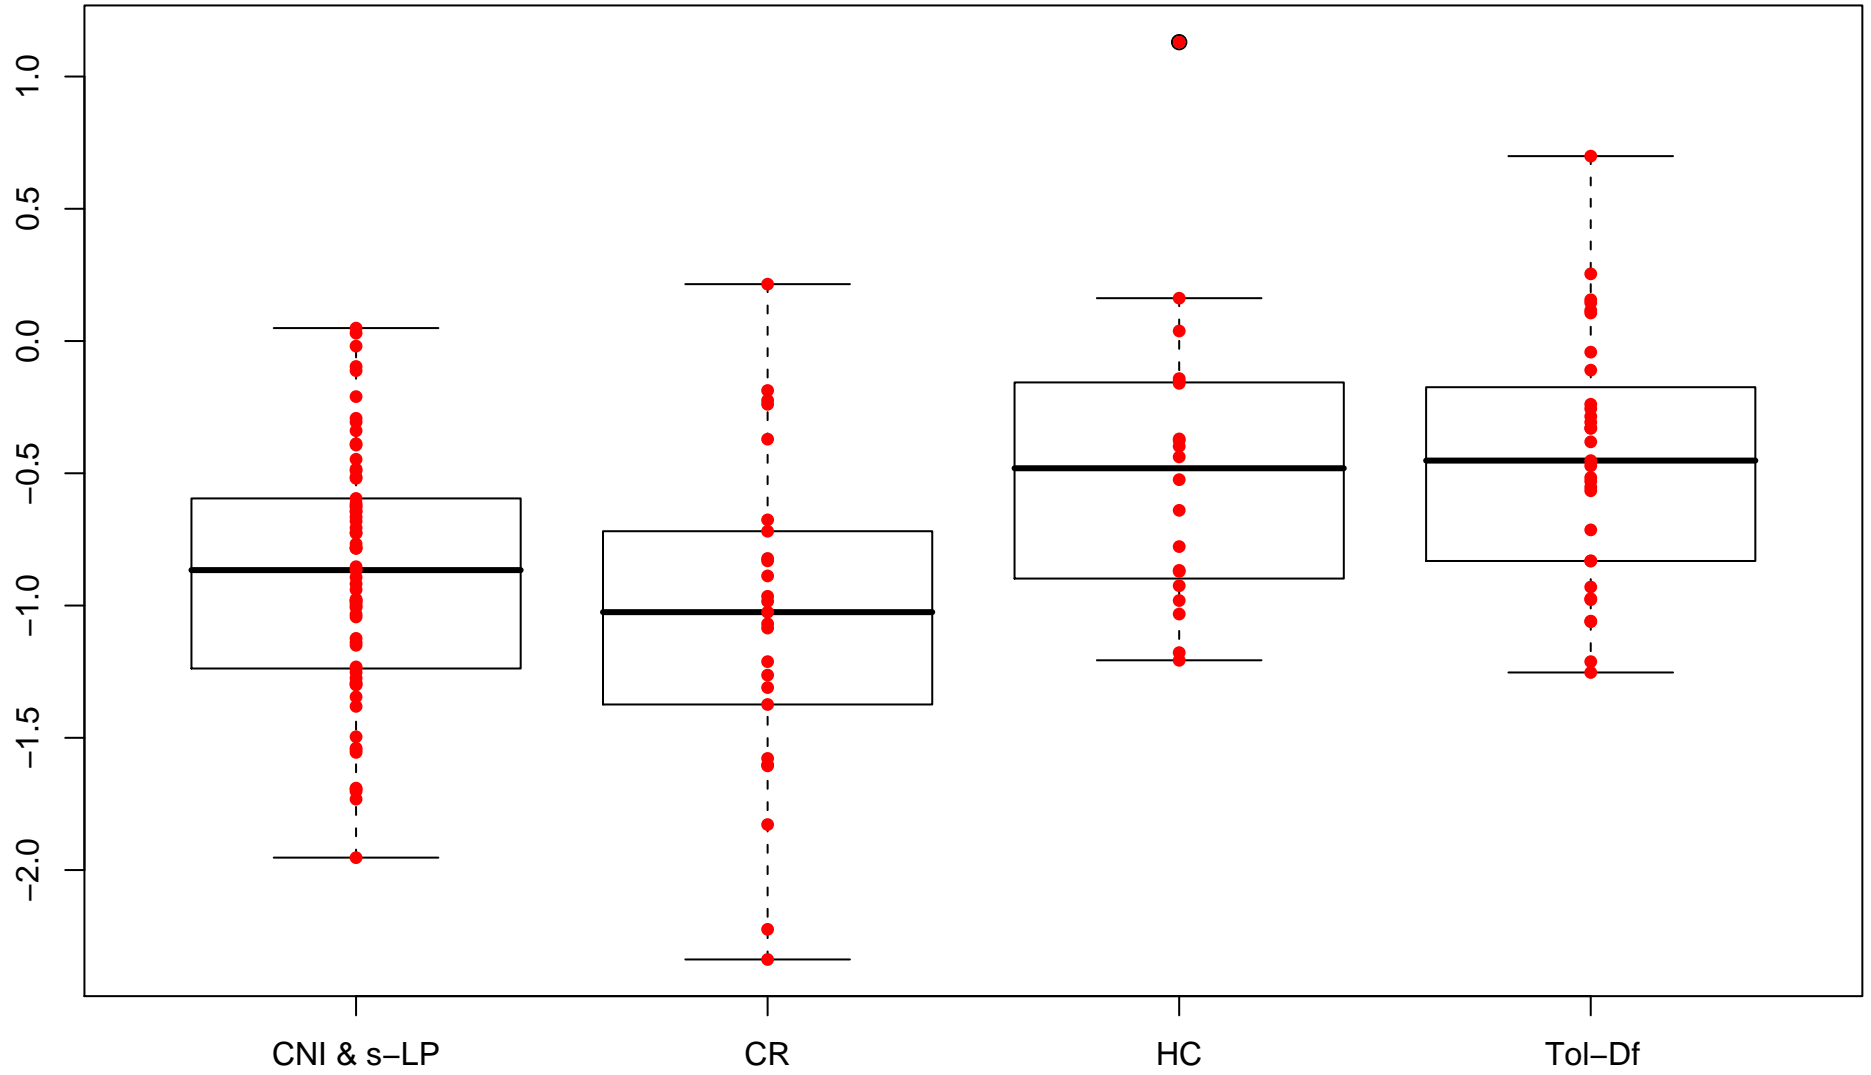

Rank 323 : C14ORF106  
4.683e-05

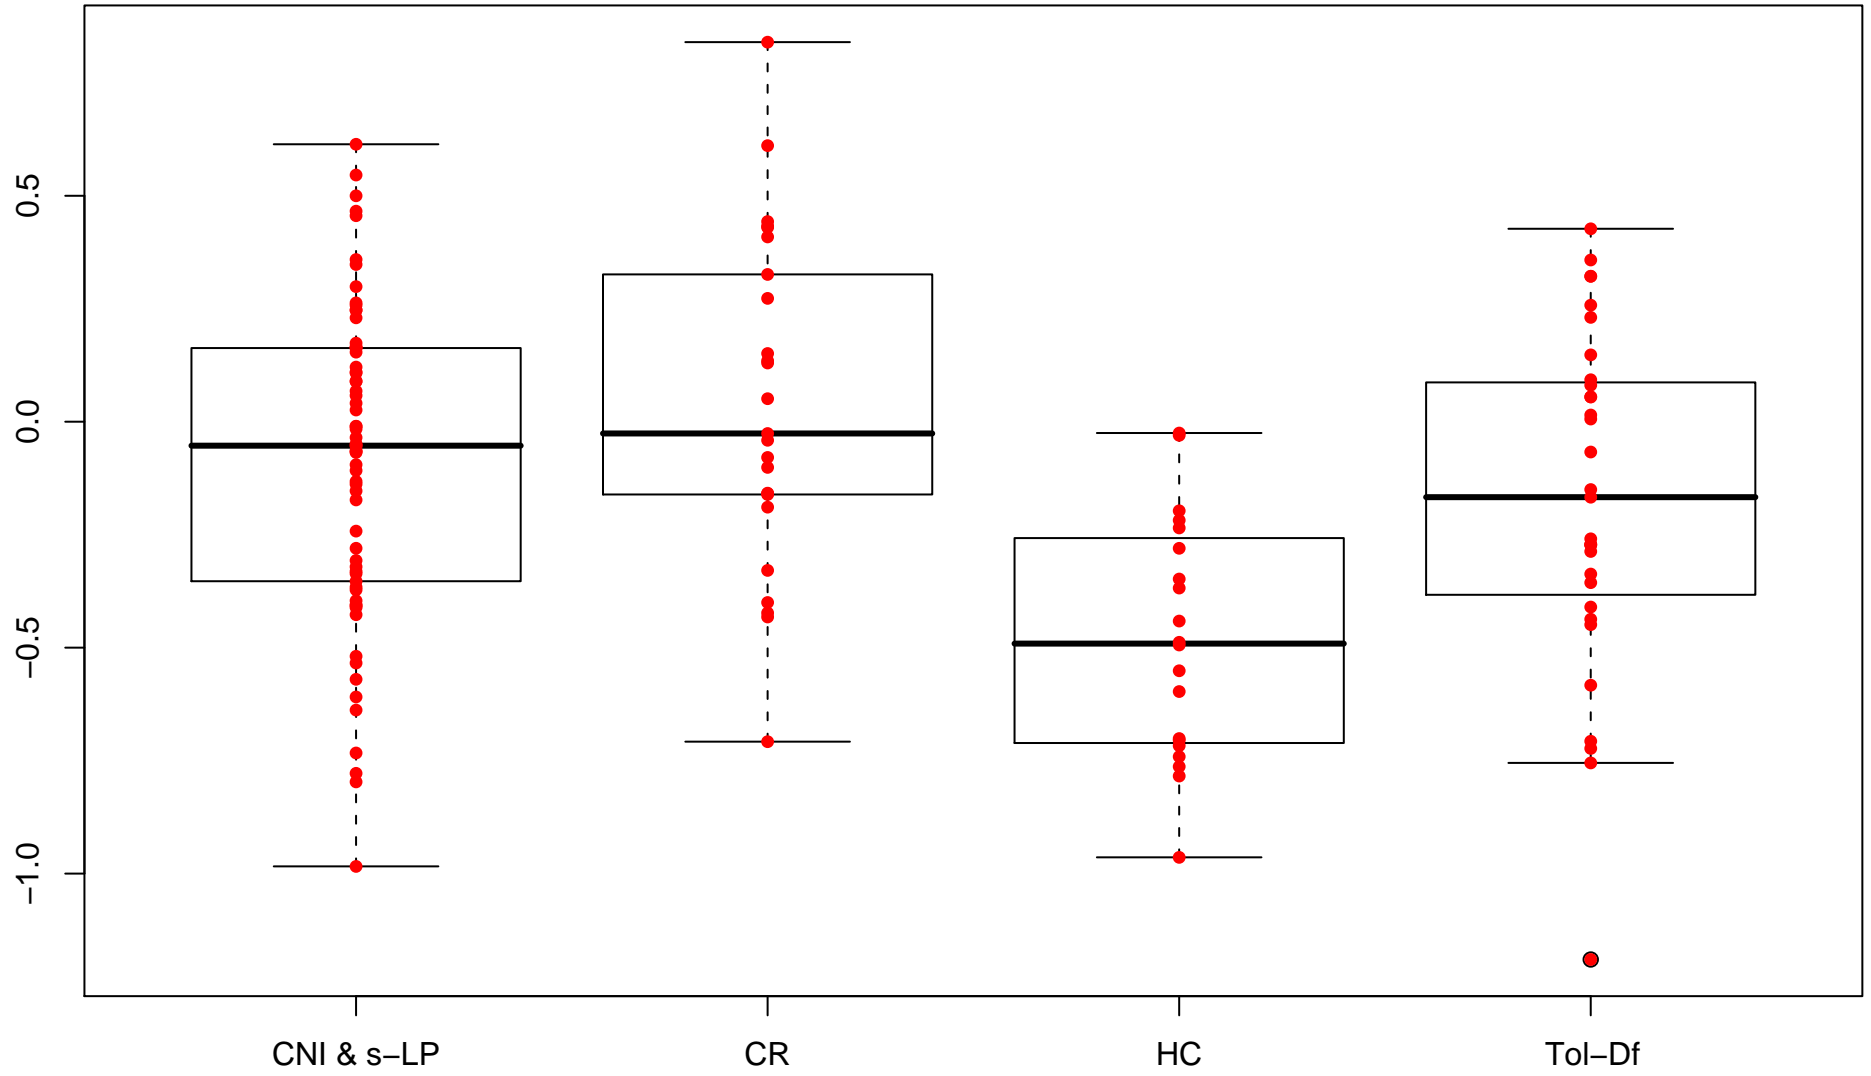

Rank 324 : AF314543  
4.751e-05

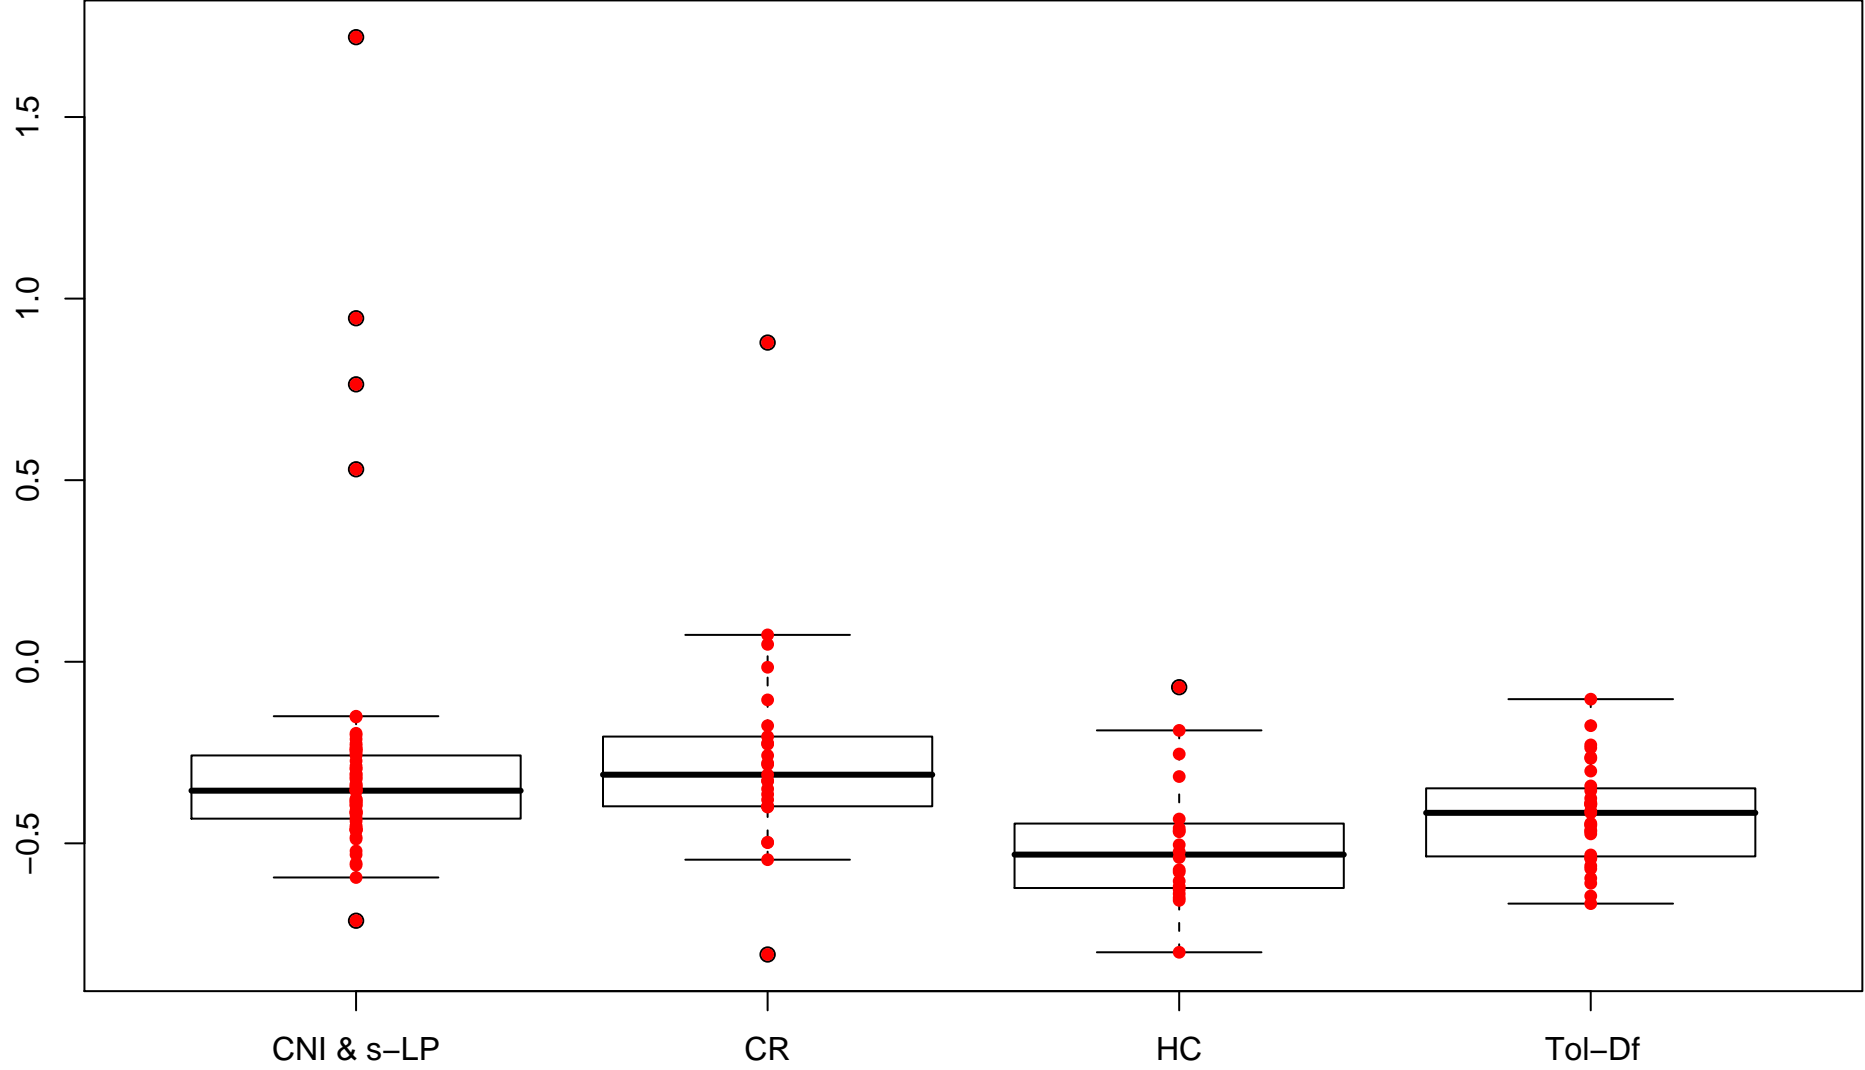

Rank 325 : A\_24\_P850187

4.798e-05

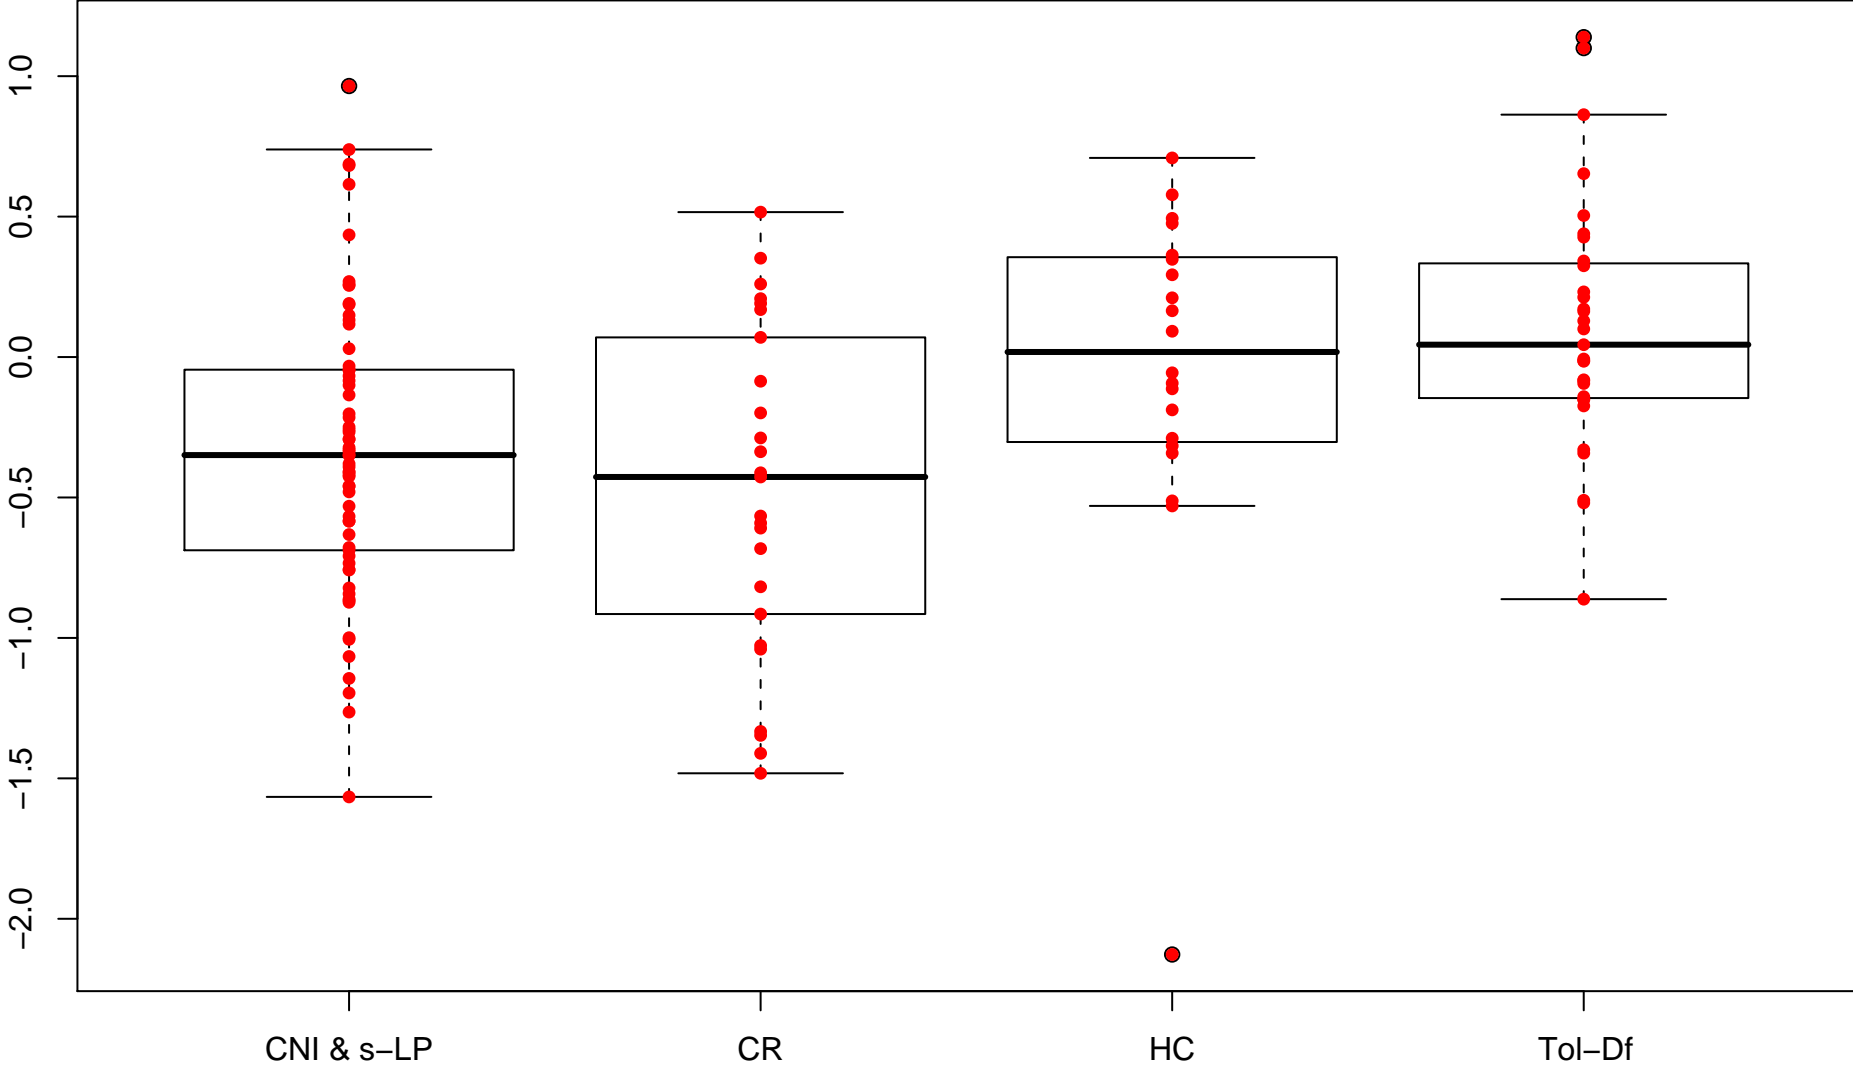

Rank 326 : CHIT1  
4.818e-05

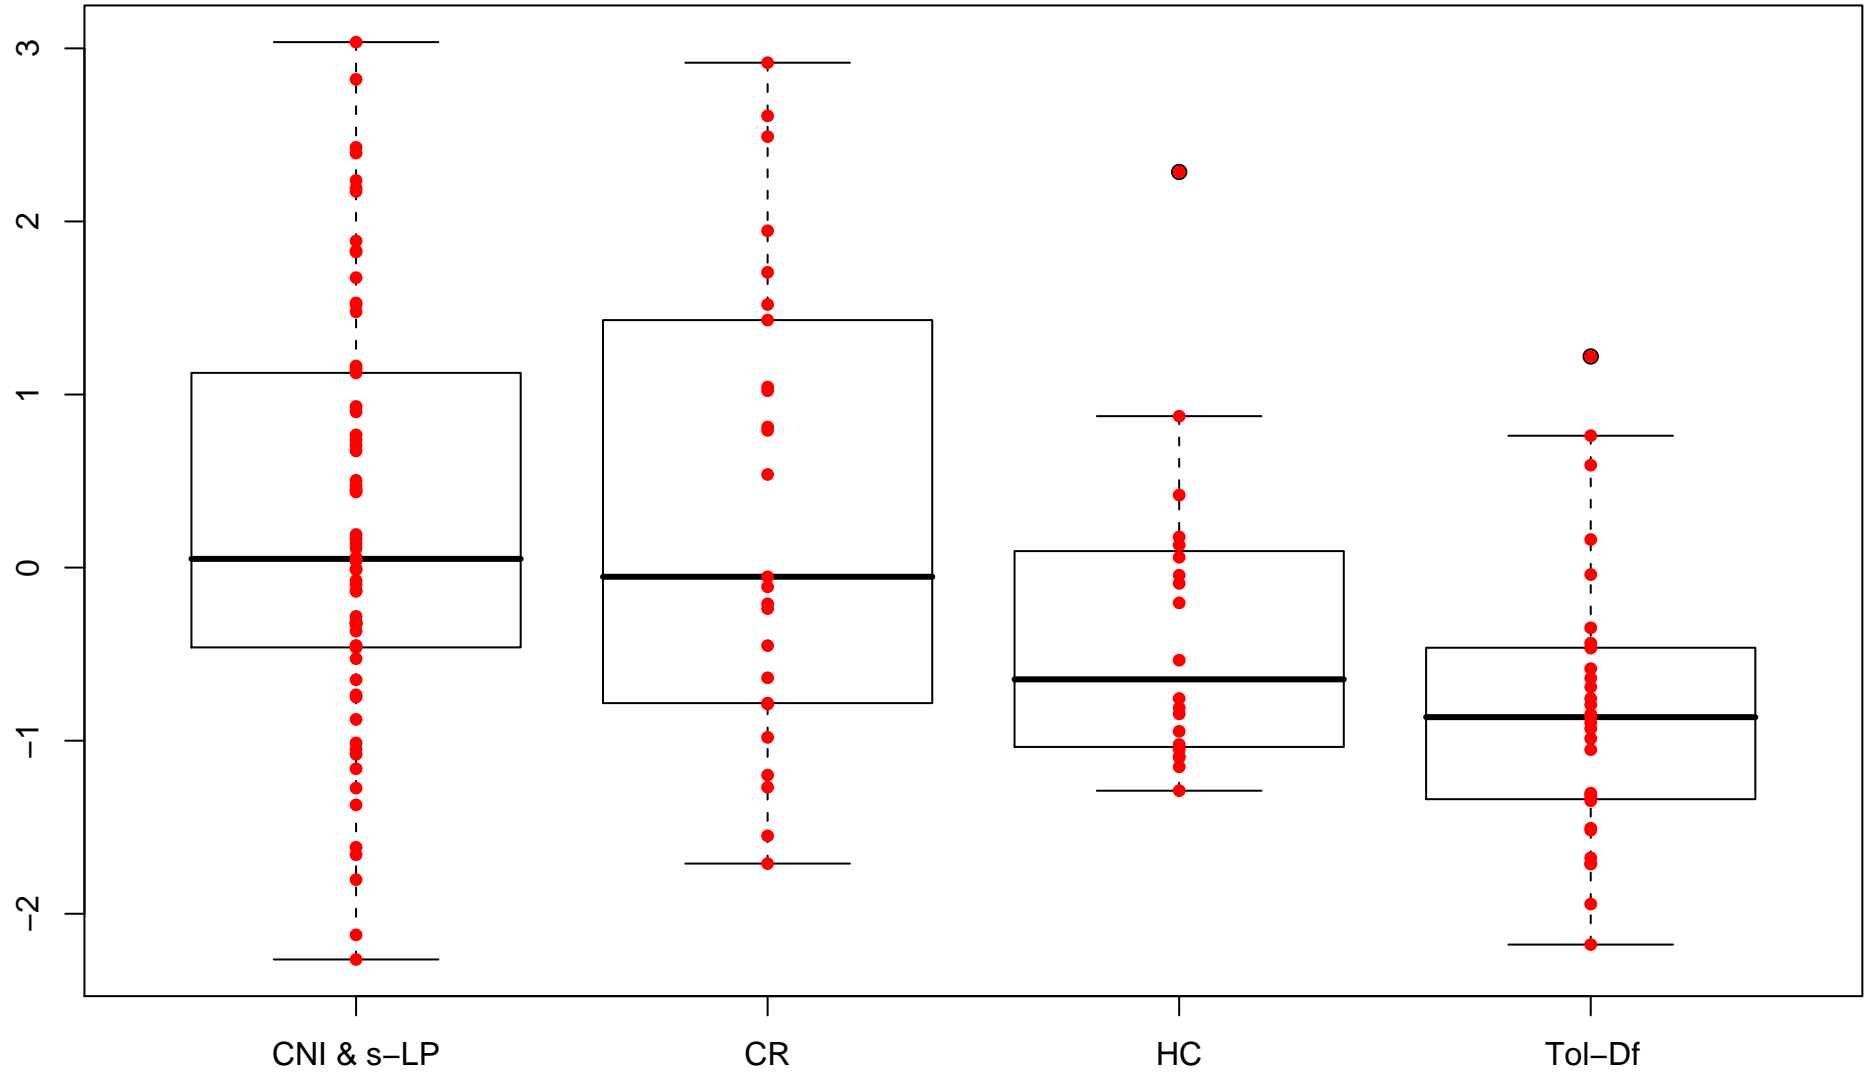

Rank 327 : PDE8B  
4.824e-05

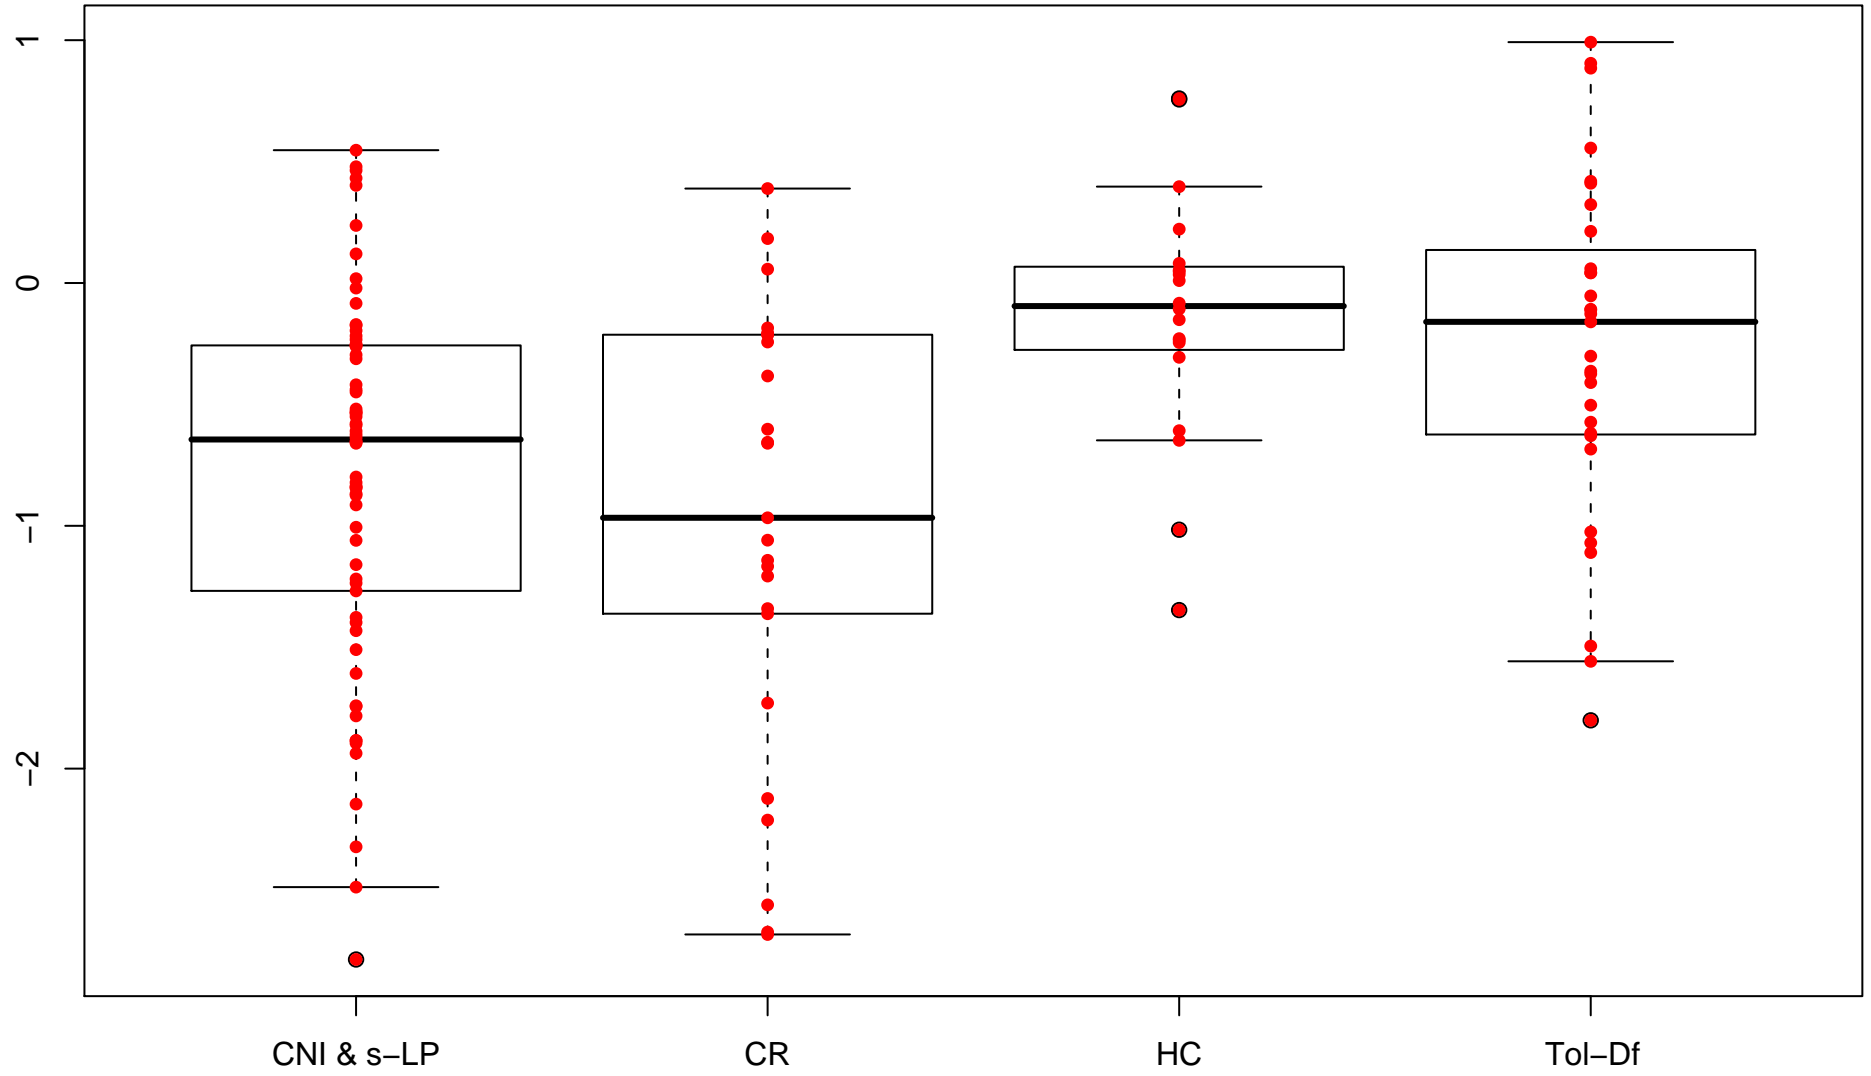



Rank 328 : HSPA9  
4.831e-05

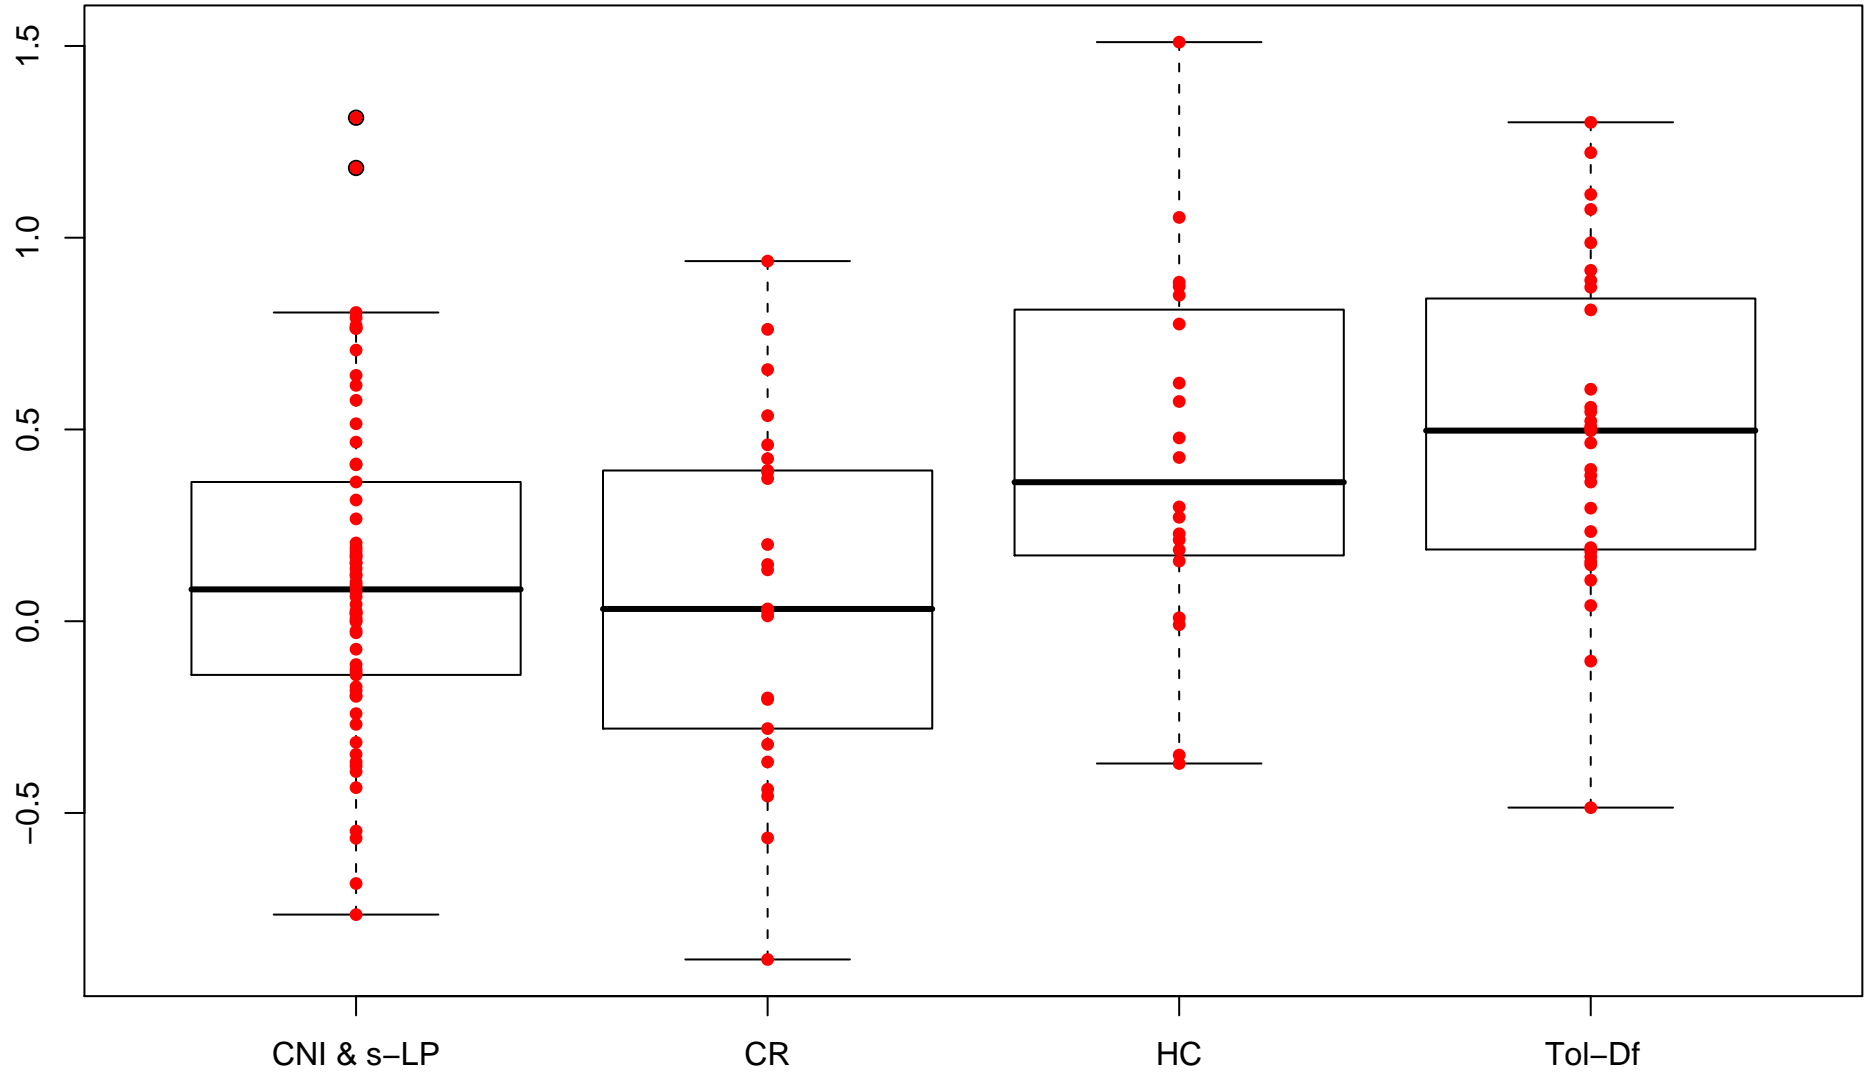

Rank 329 : SH2D1B  
4.841e-05

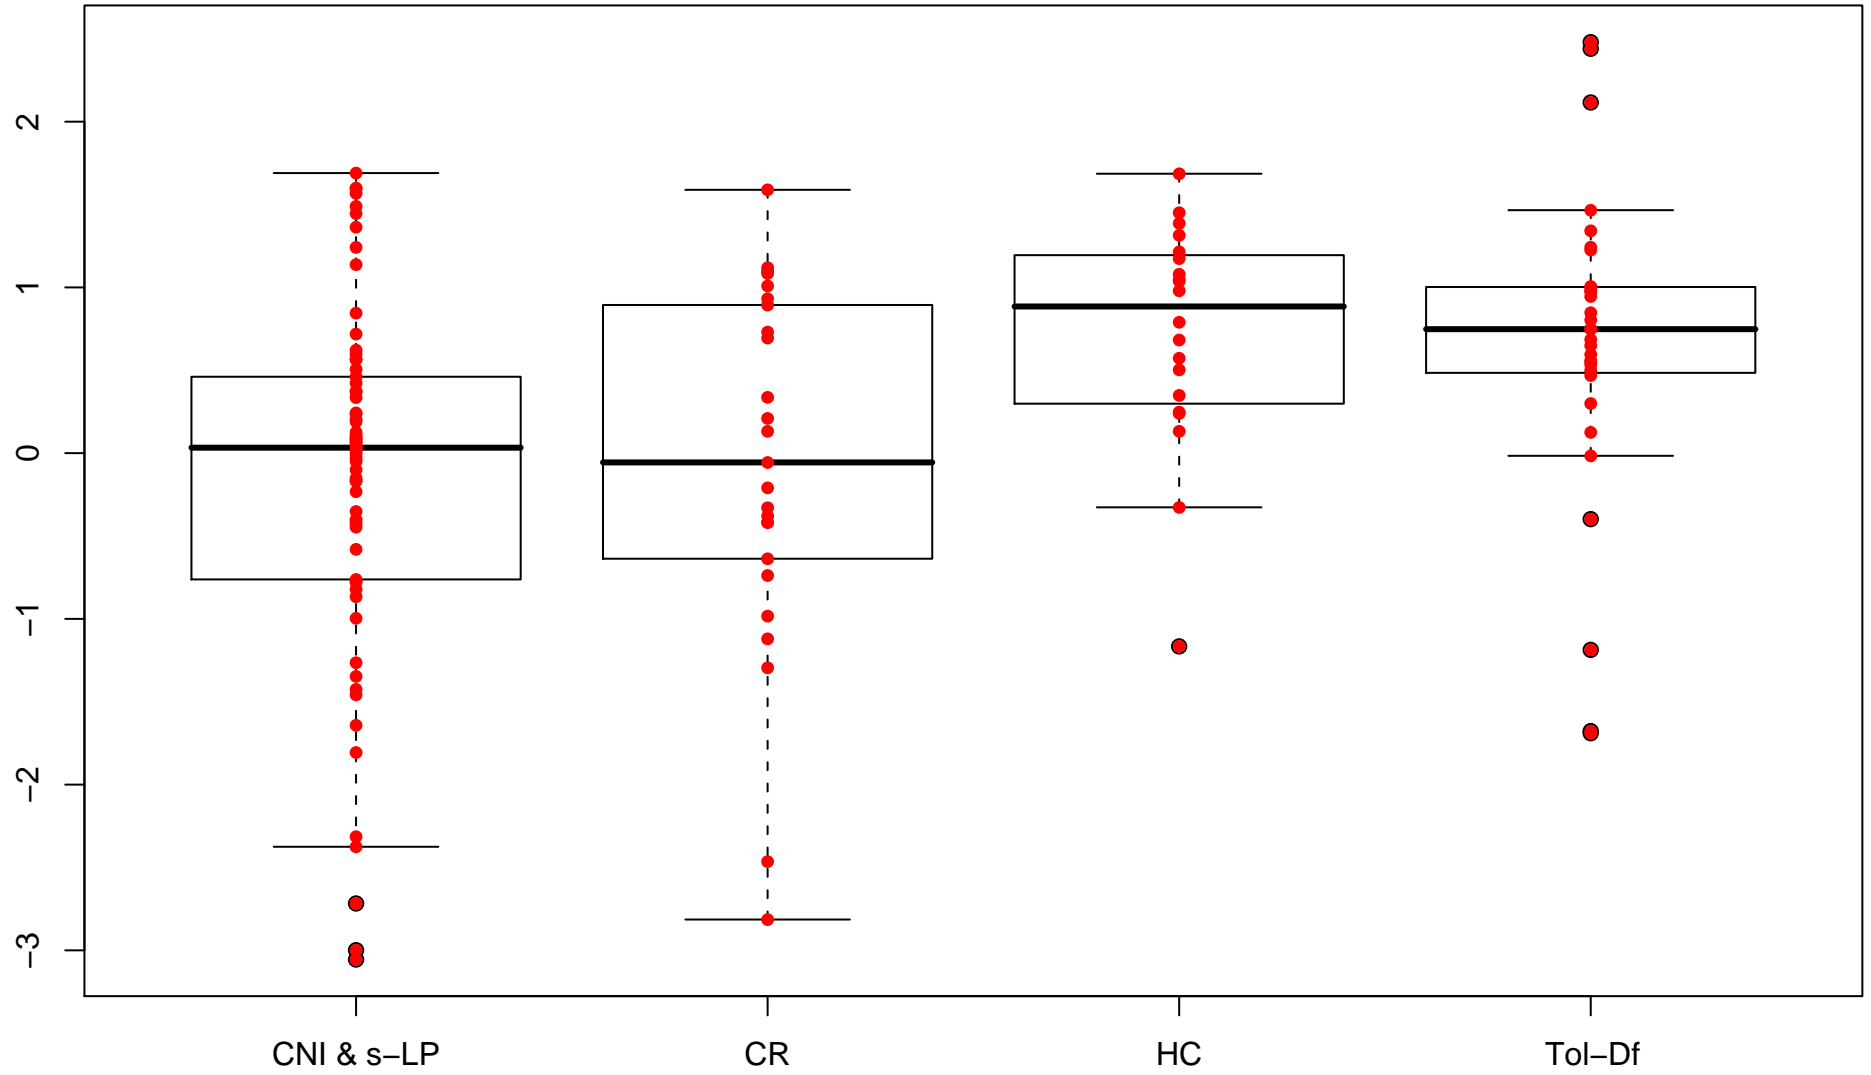

Rank 330 : MEF2A  
4.892e-05

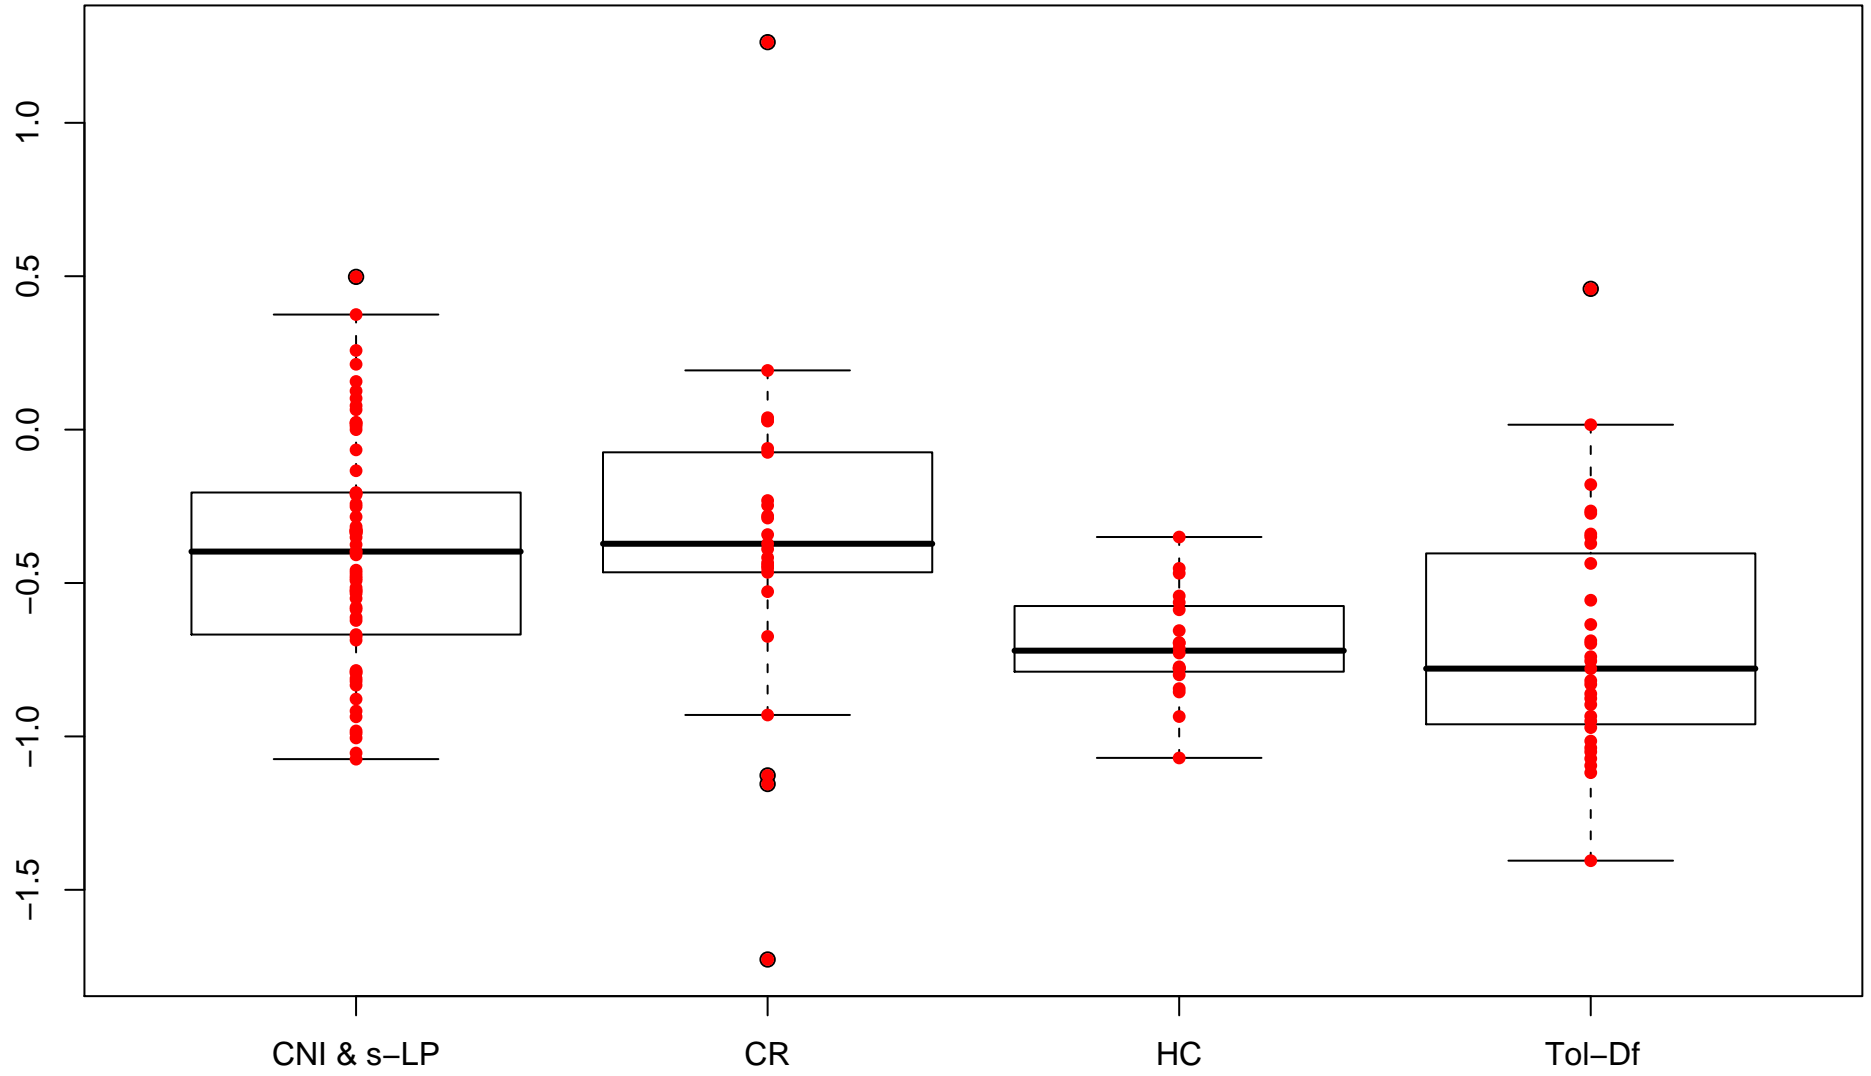

Rank 331 : TMTC3  
4.896e-05

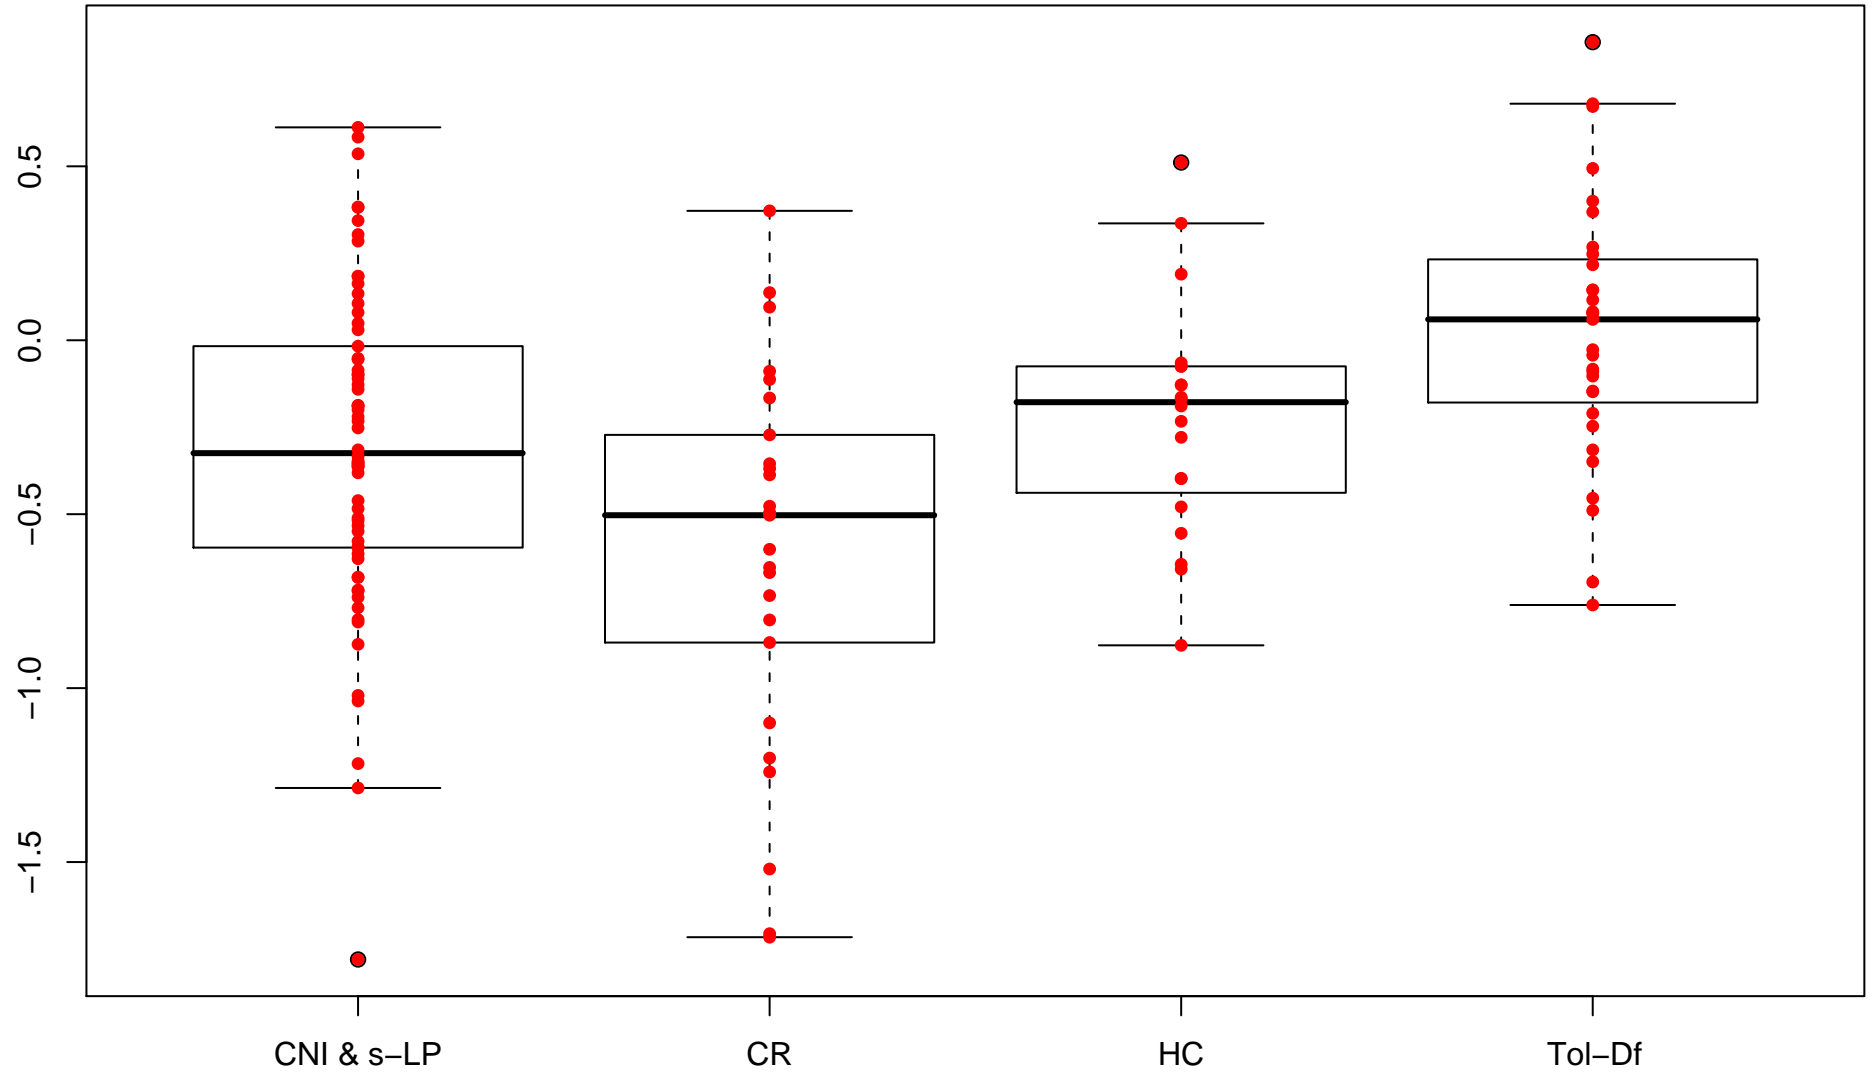

Rank 332 : MIRN155  
5.019e-05

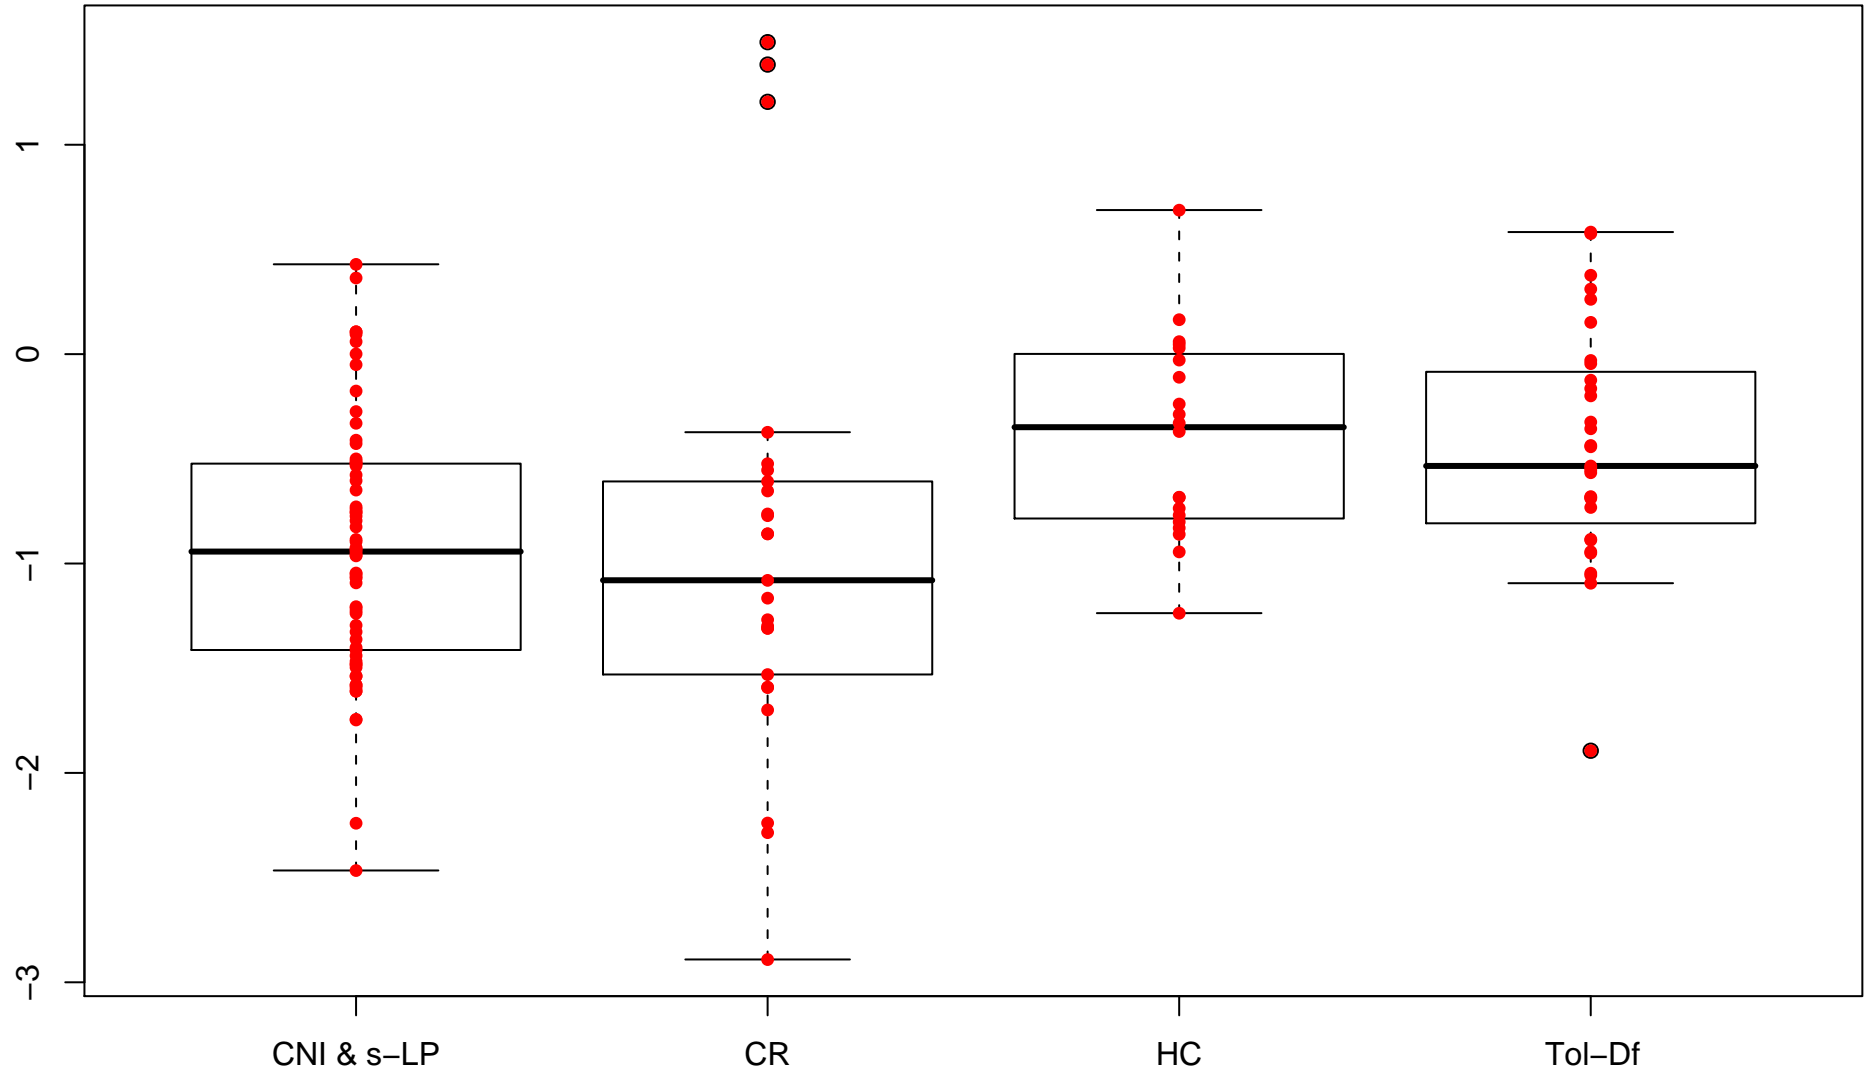

Rank 333 : GALNT14  
5.1e-05

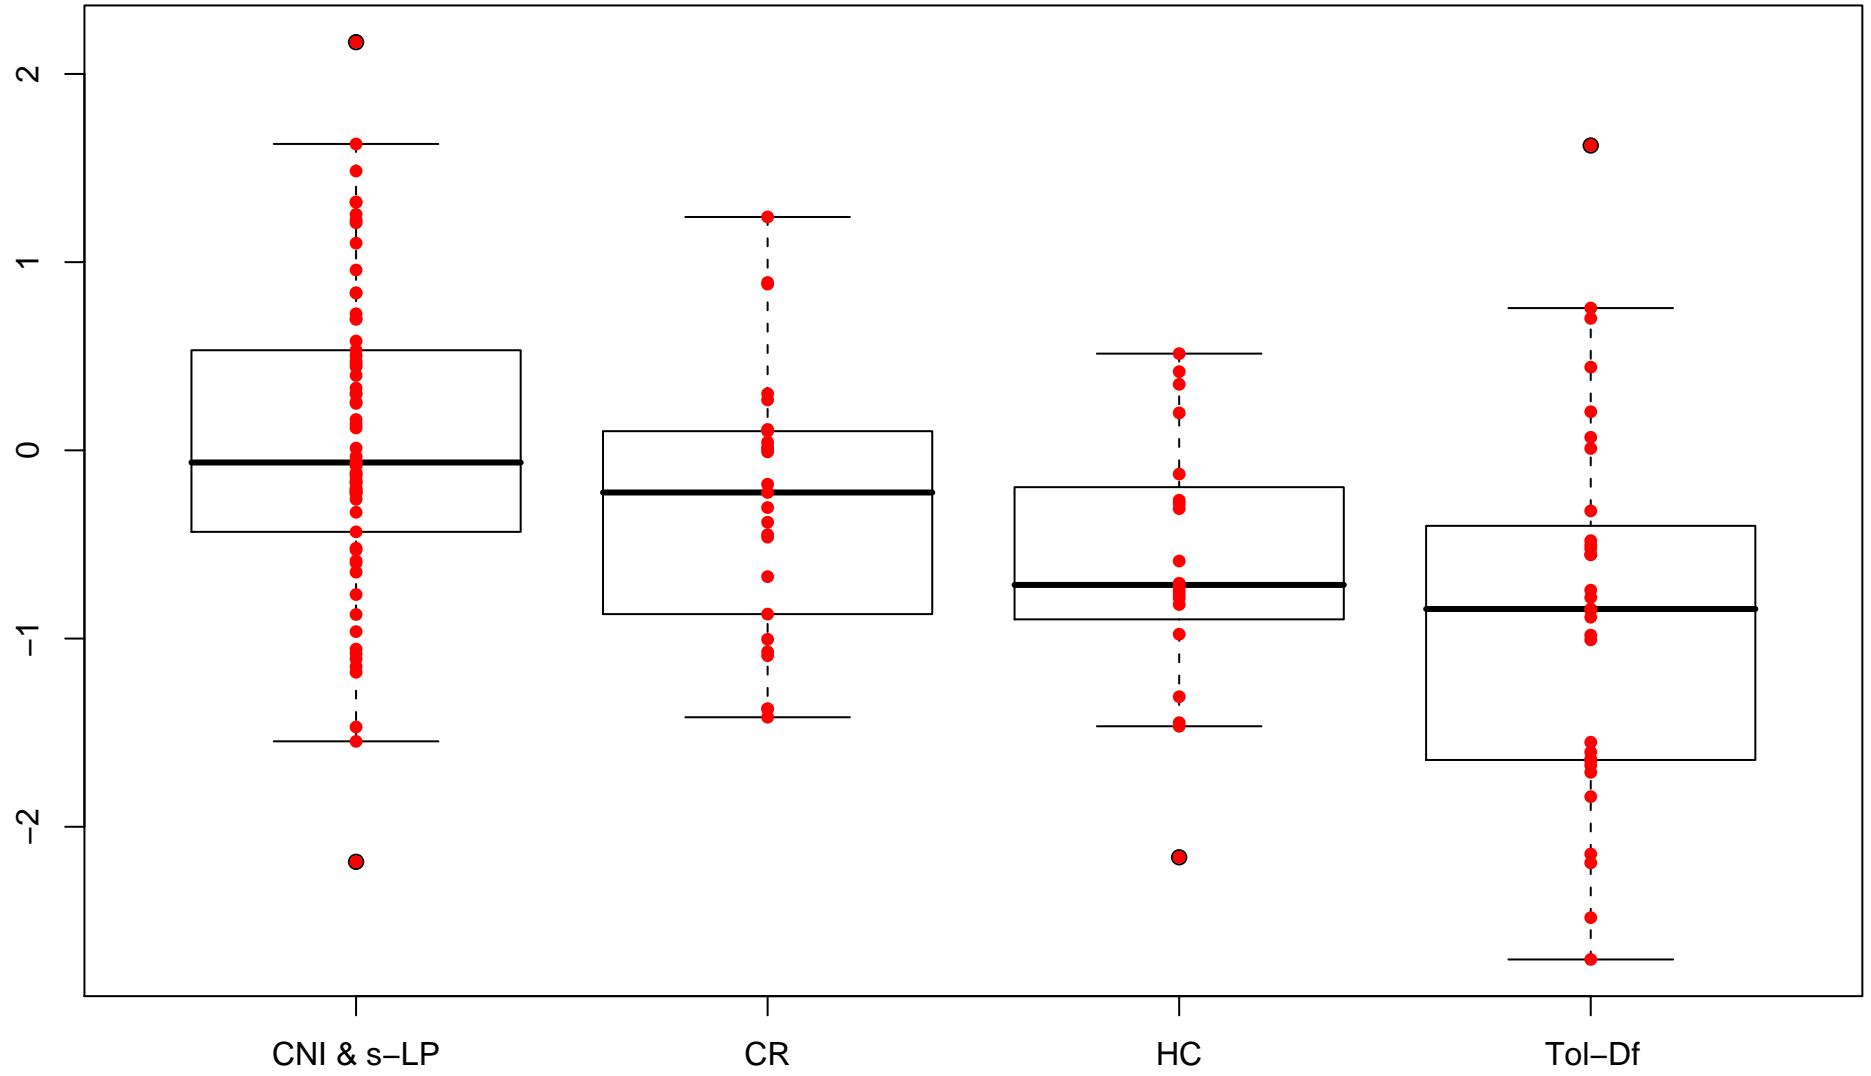

Rank 334 : PPIA  
5.102e-05

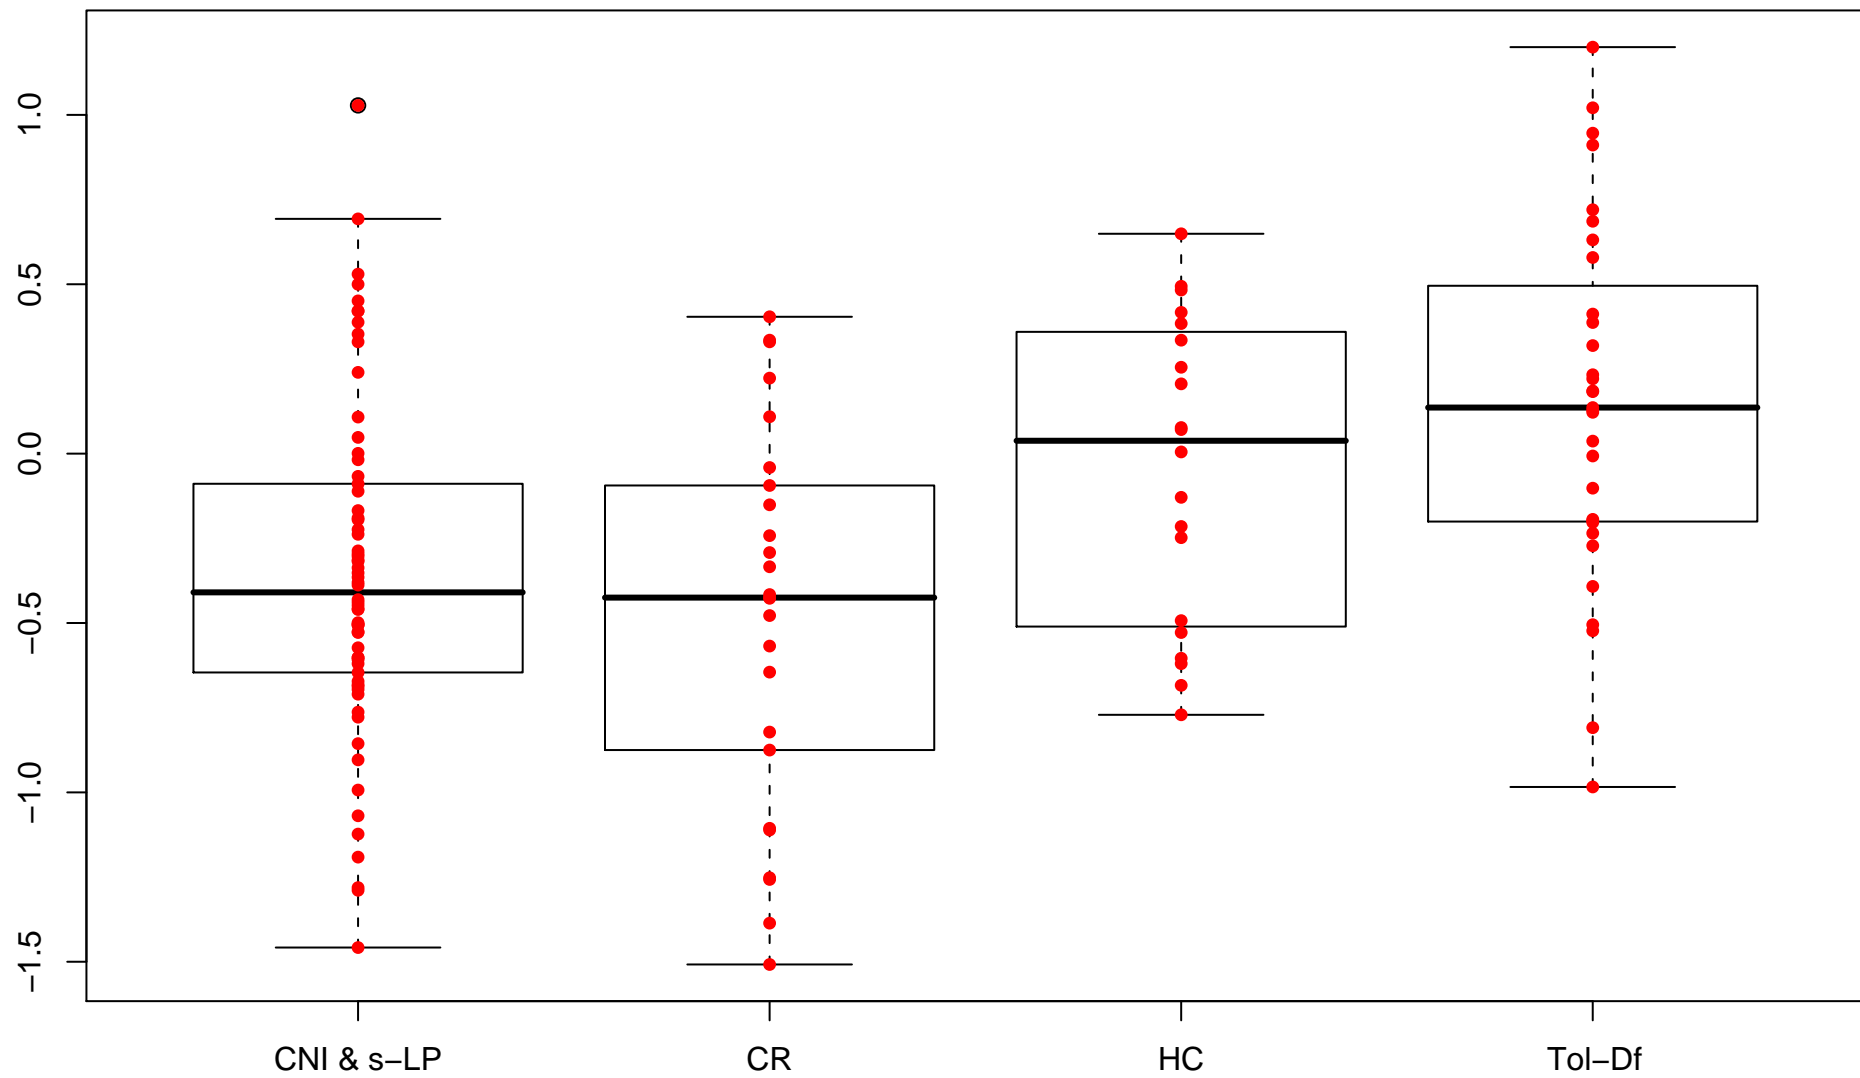

Rank 335 : BCKDHB  
5.157e-05

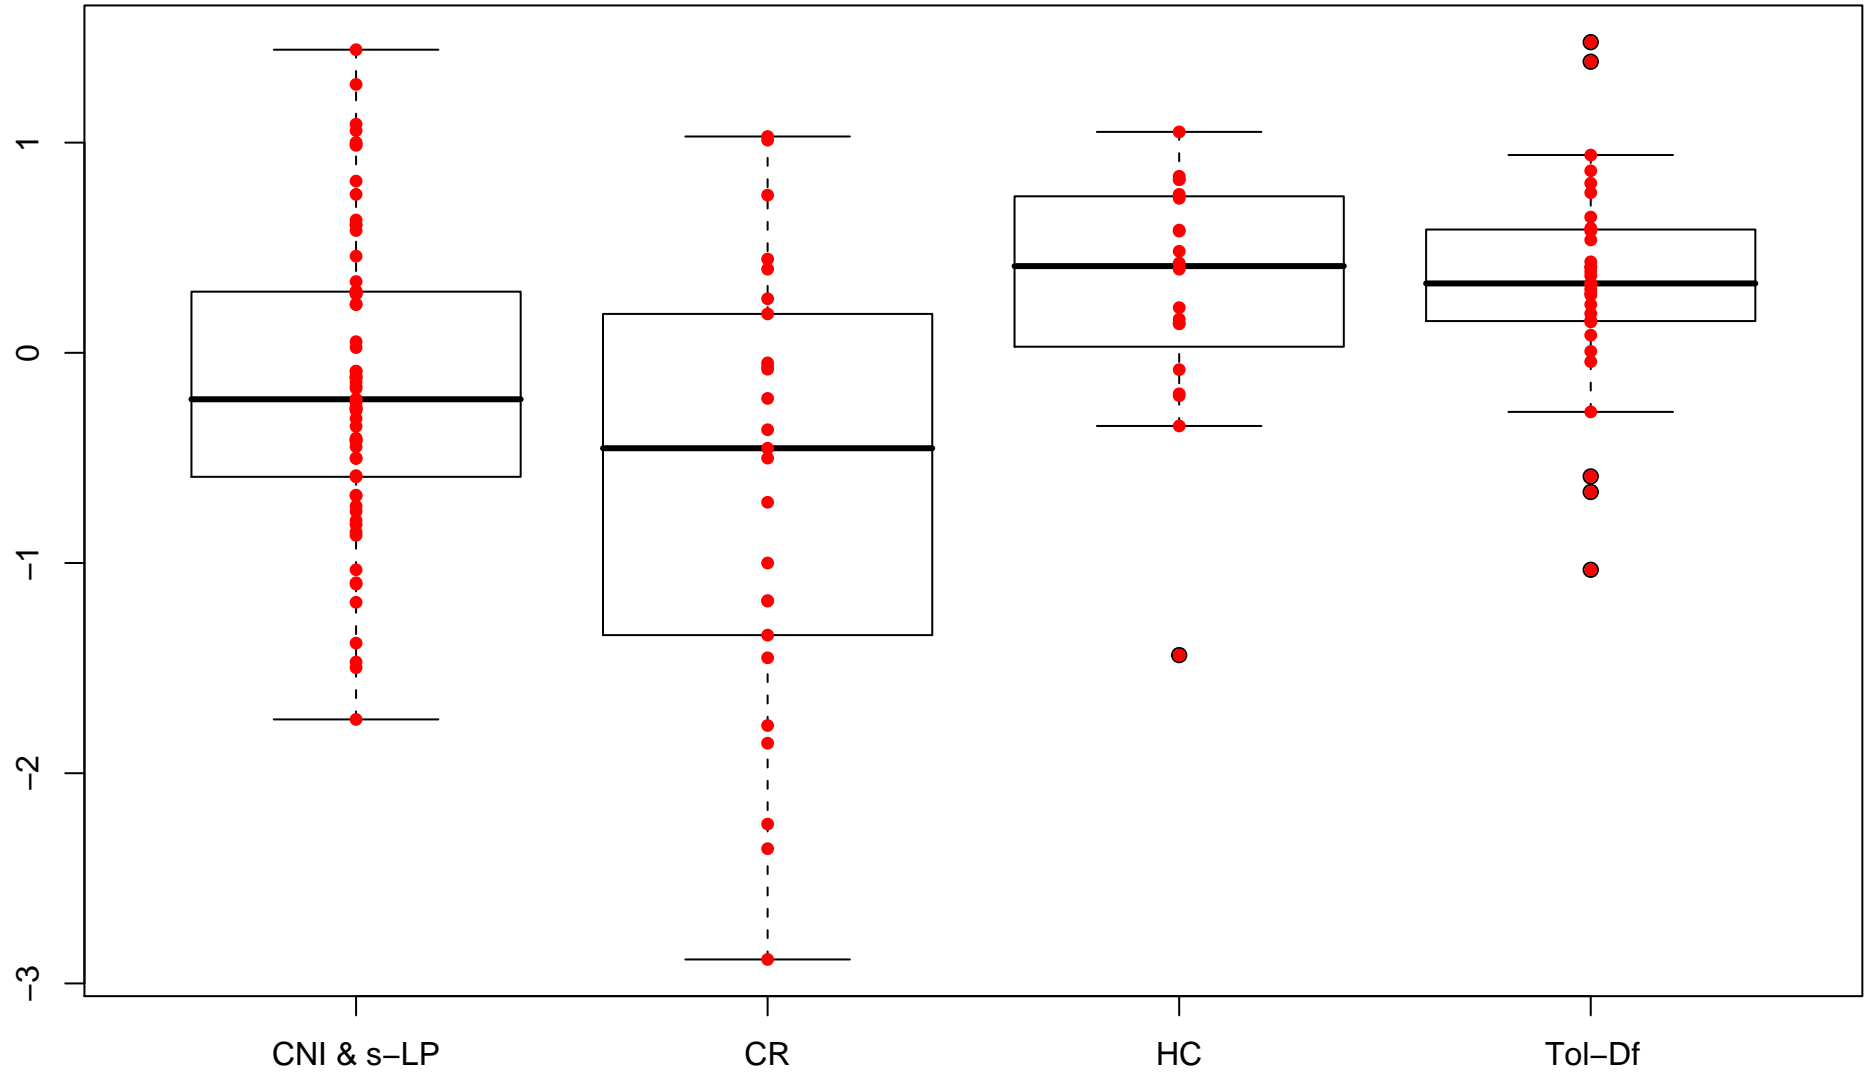



Rank 336 : SFRS2  
5.169e-05

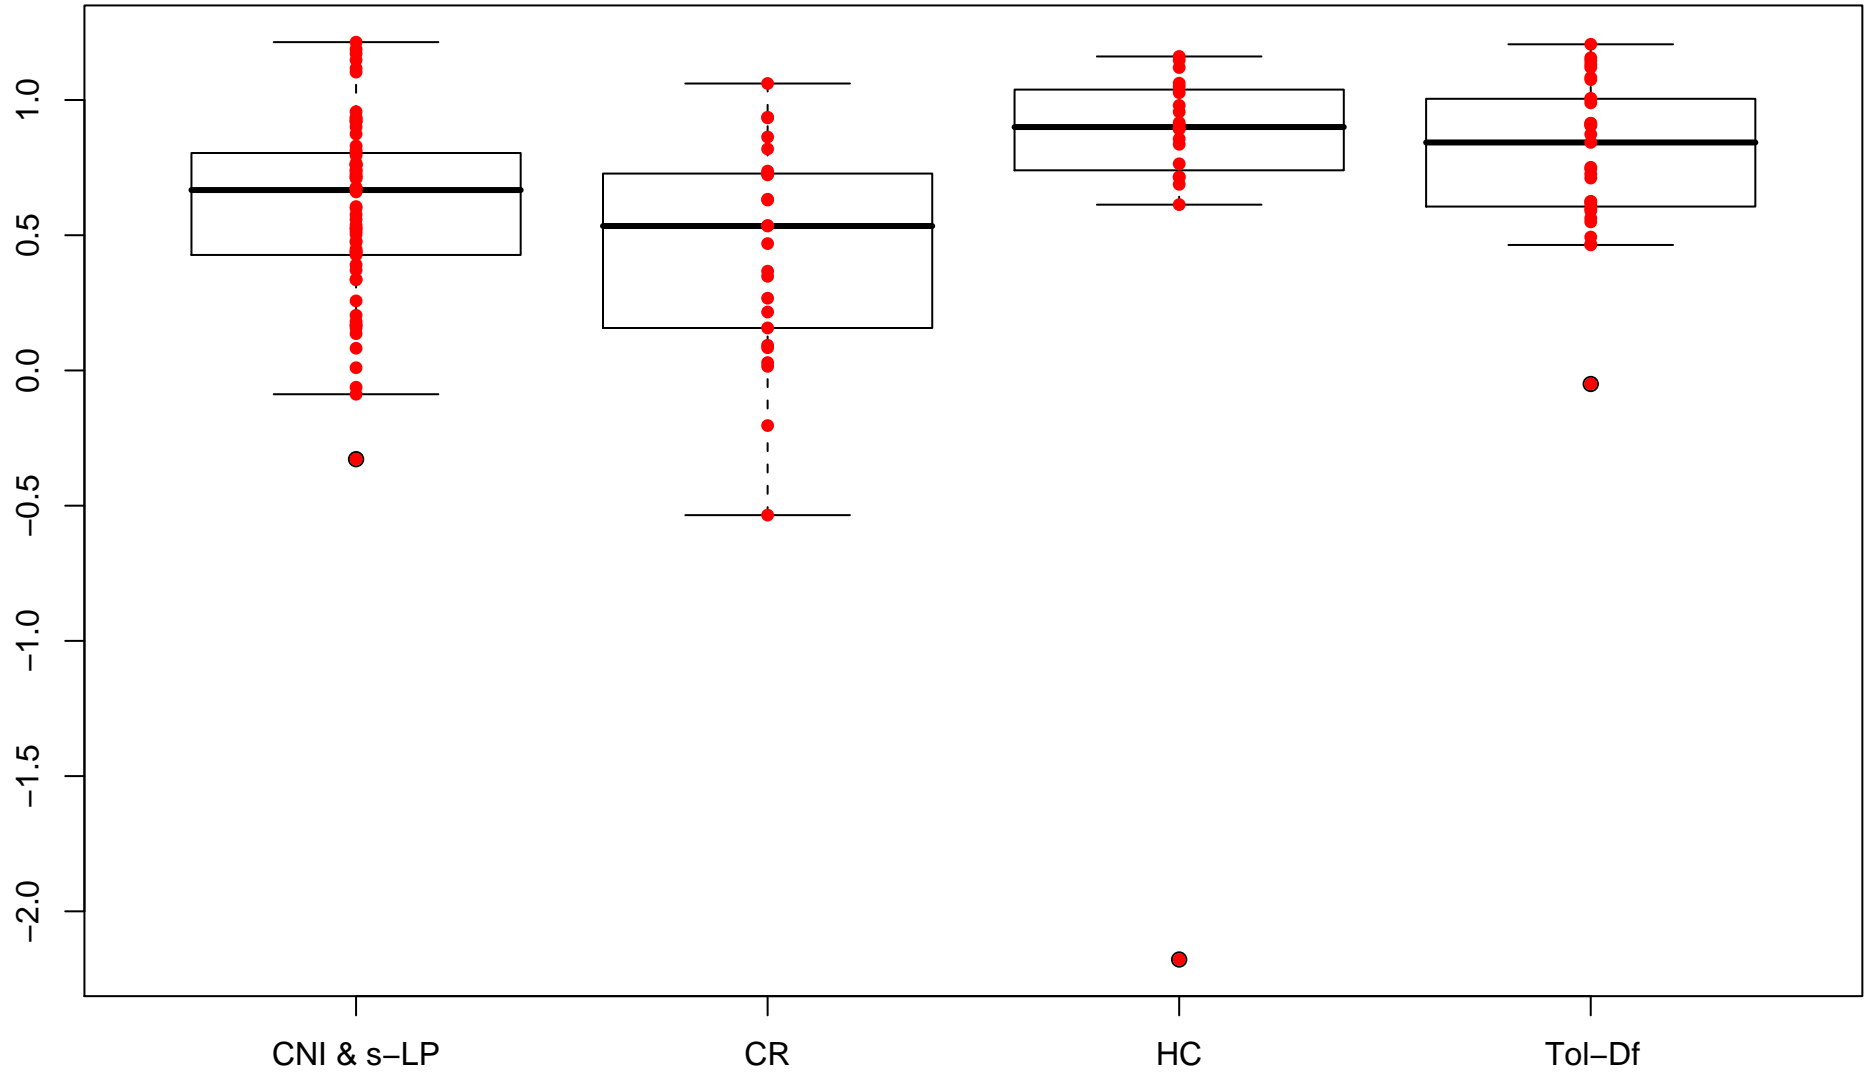

Rank 337 : GALNT4  
5.171e-05

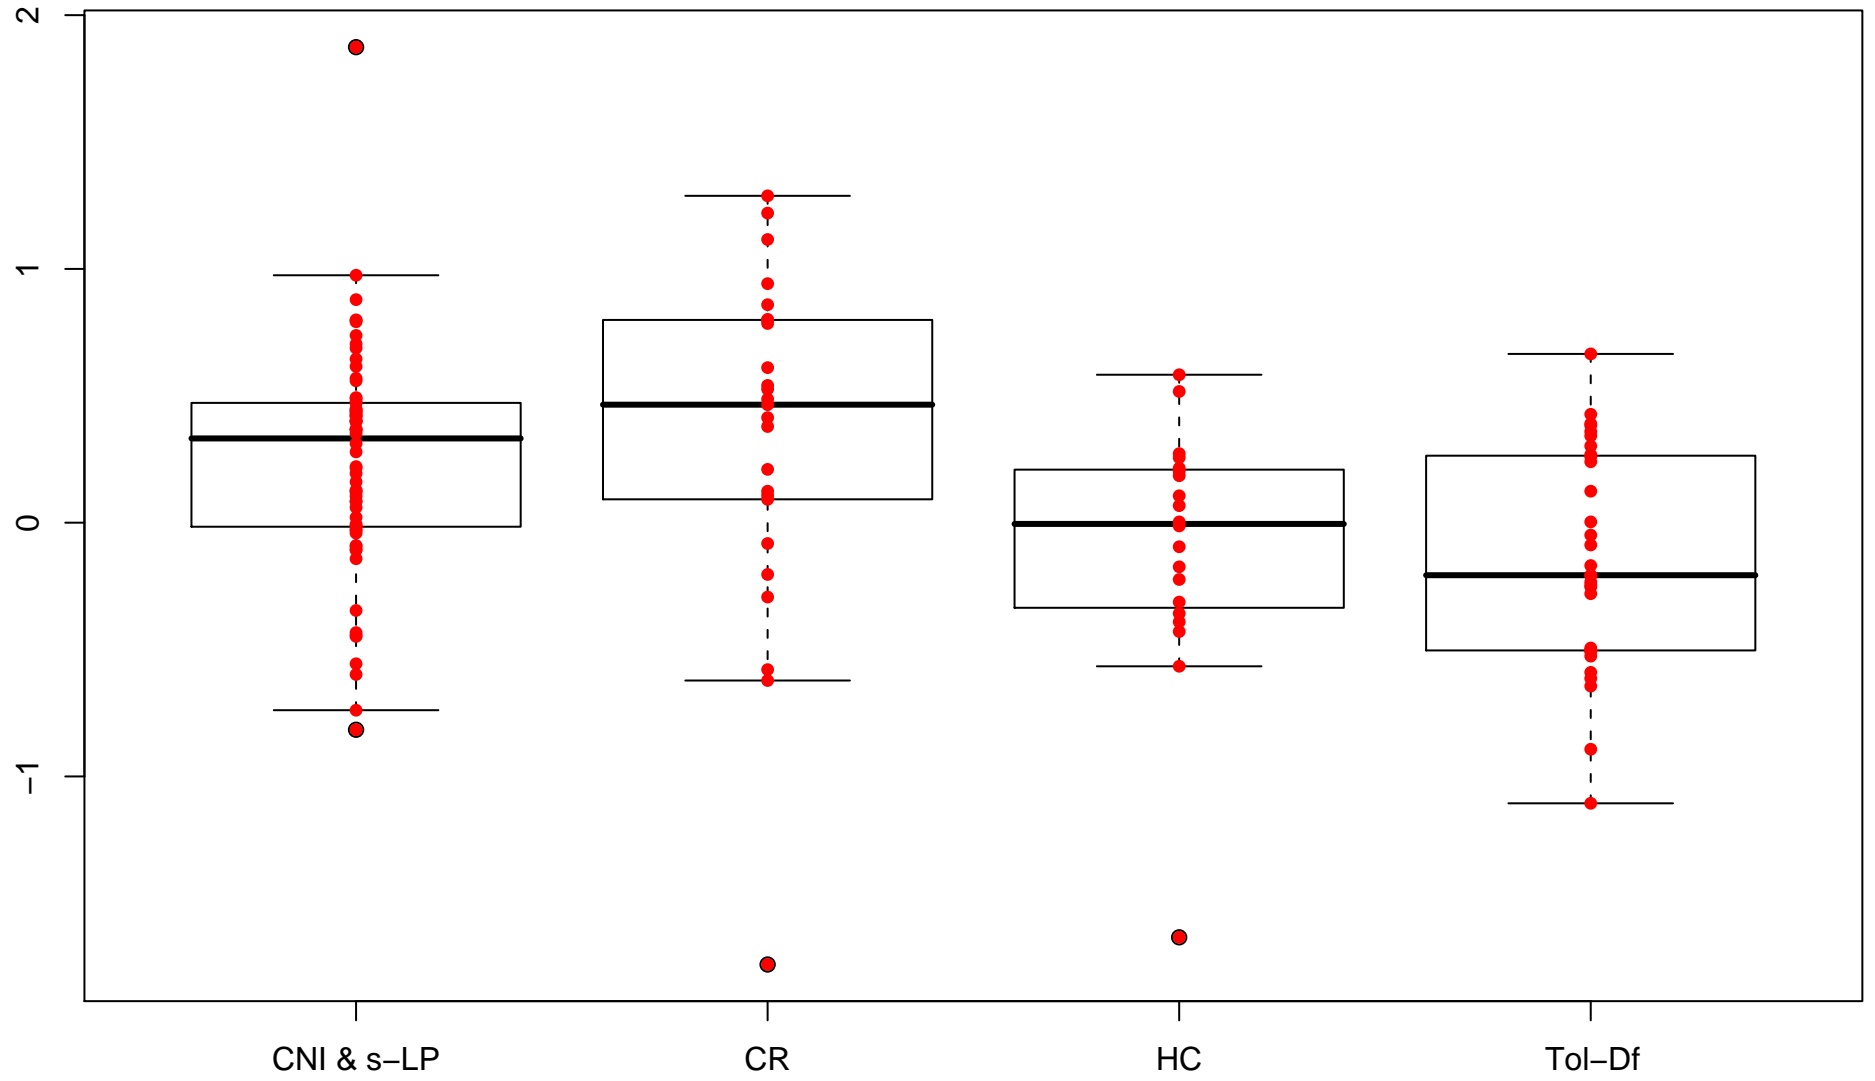

Rank 338 : SATB1  
5.219e-05

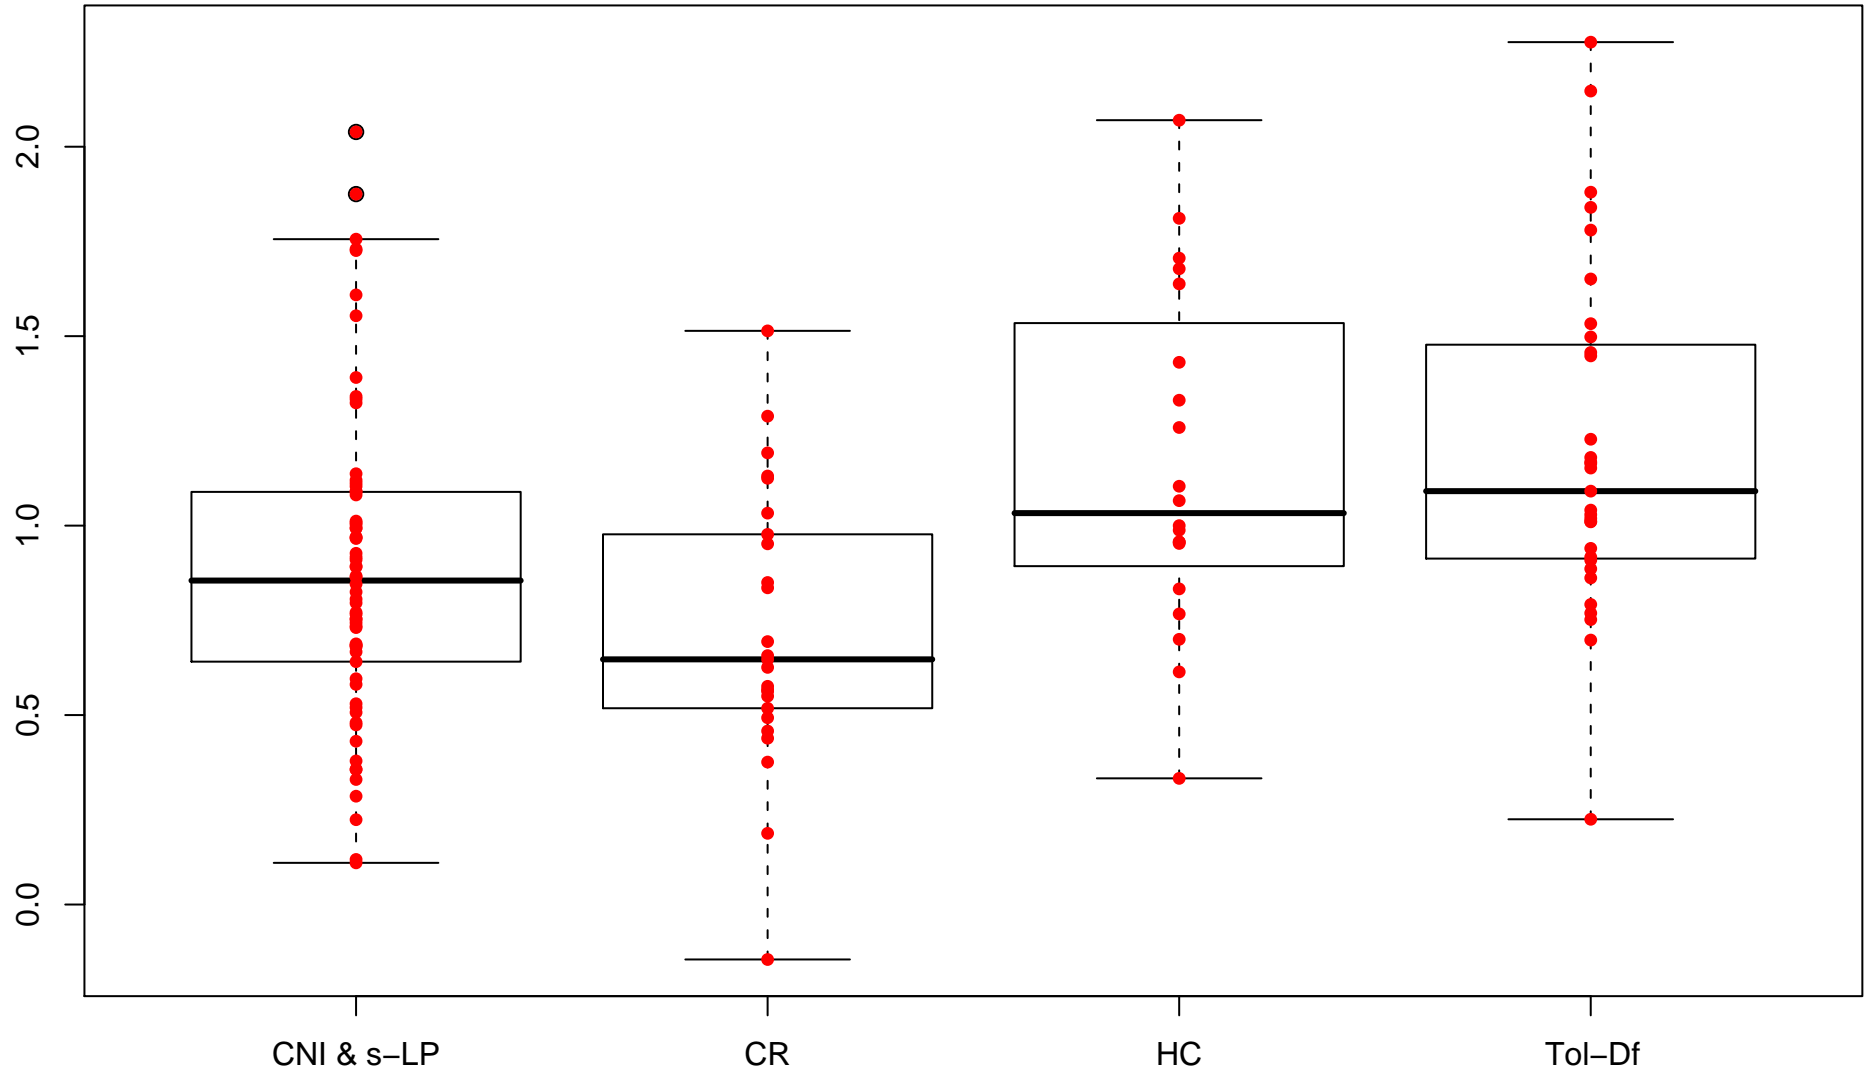

Rank 339 : PRKCE  
5.241e-05

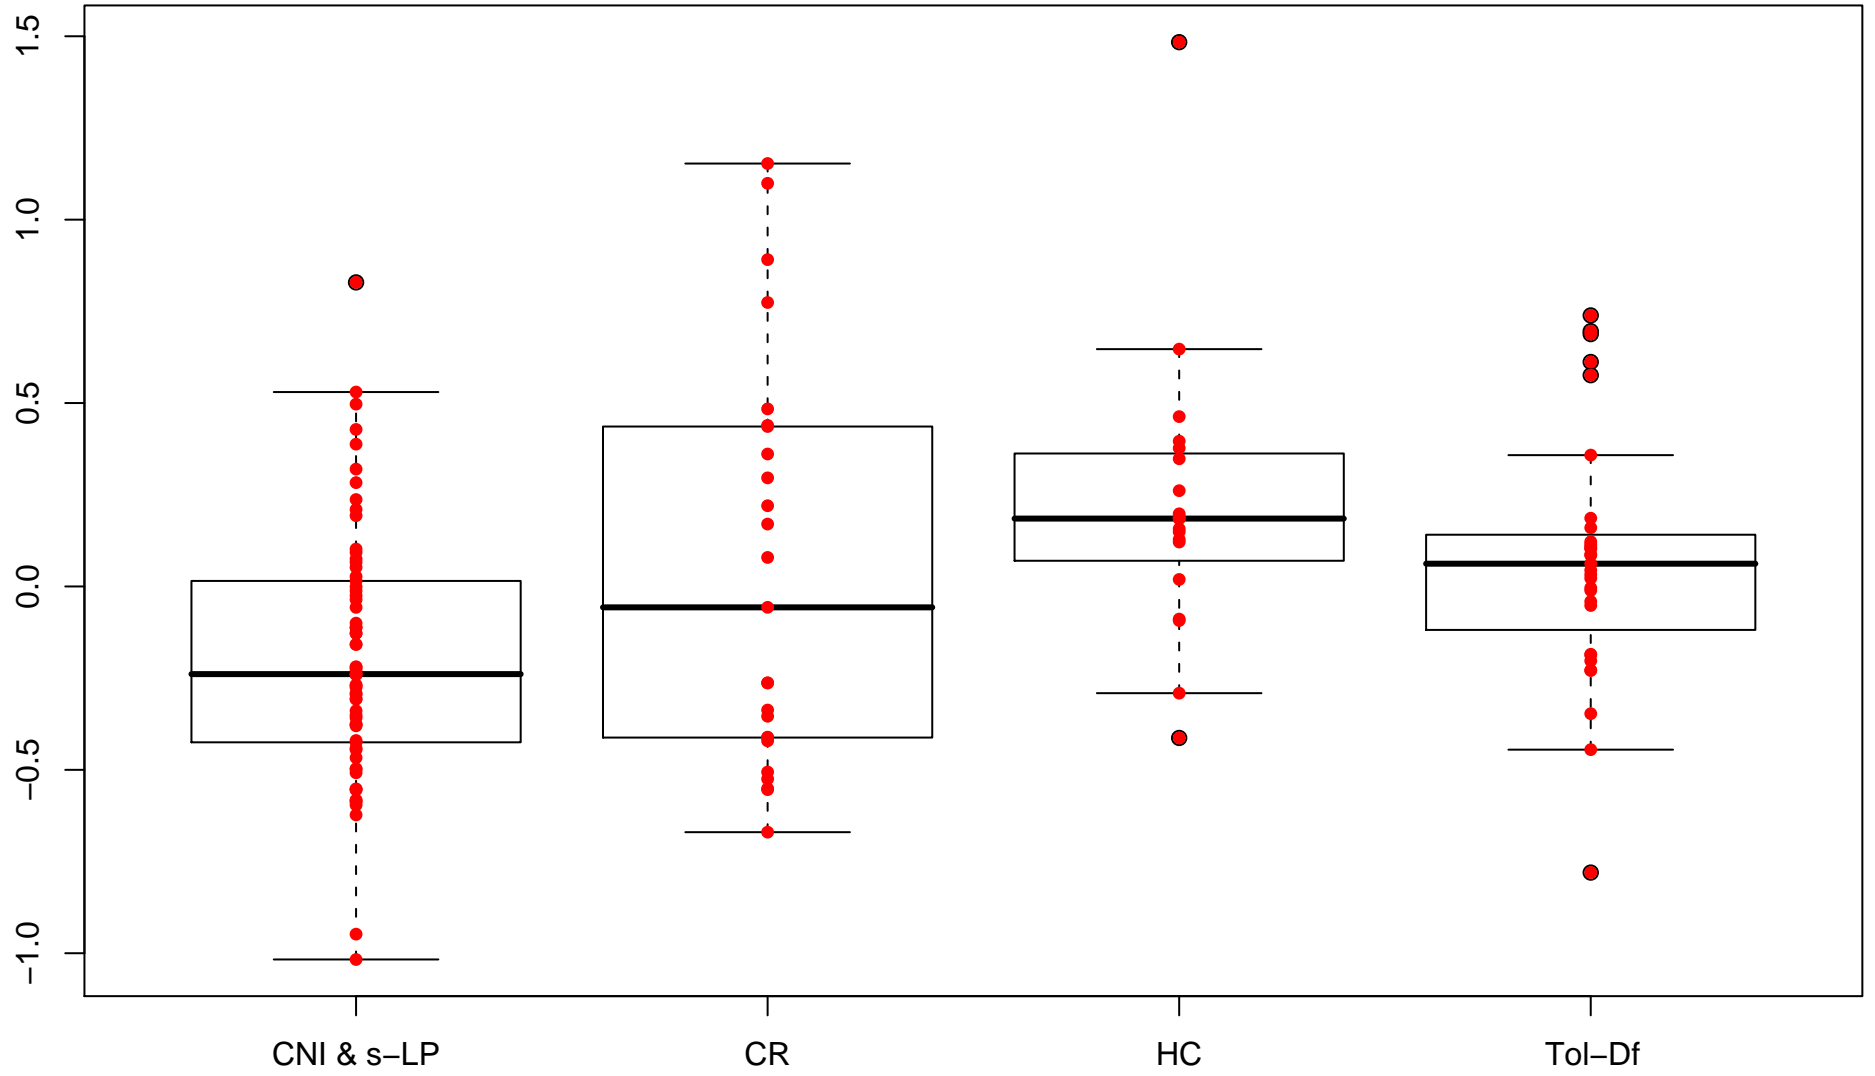

Rank 340 : ZNF17  
5.304e-05

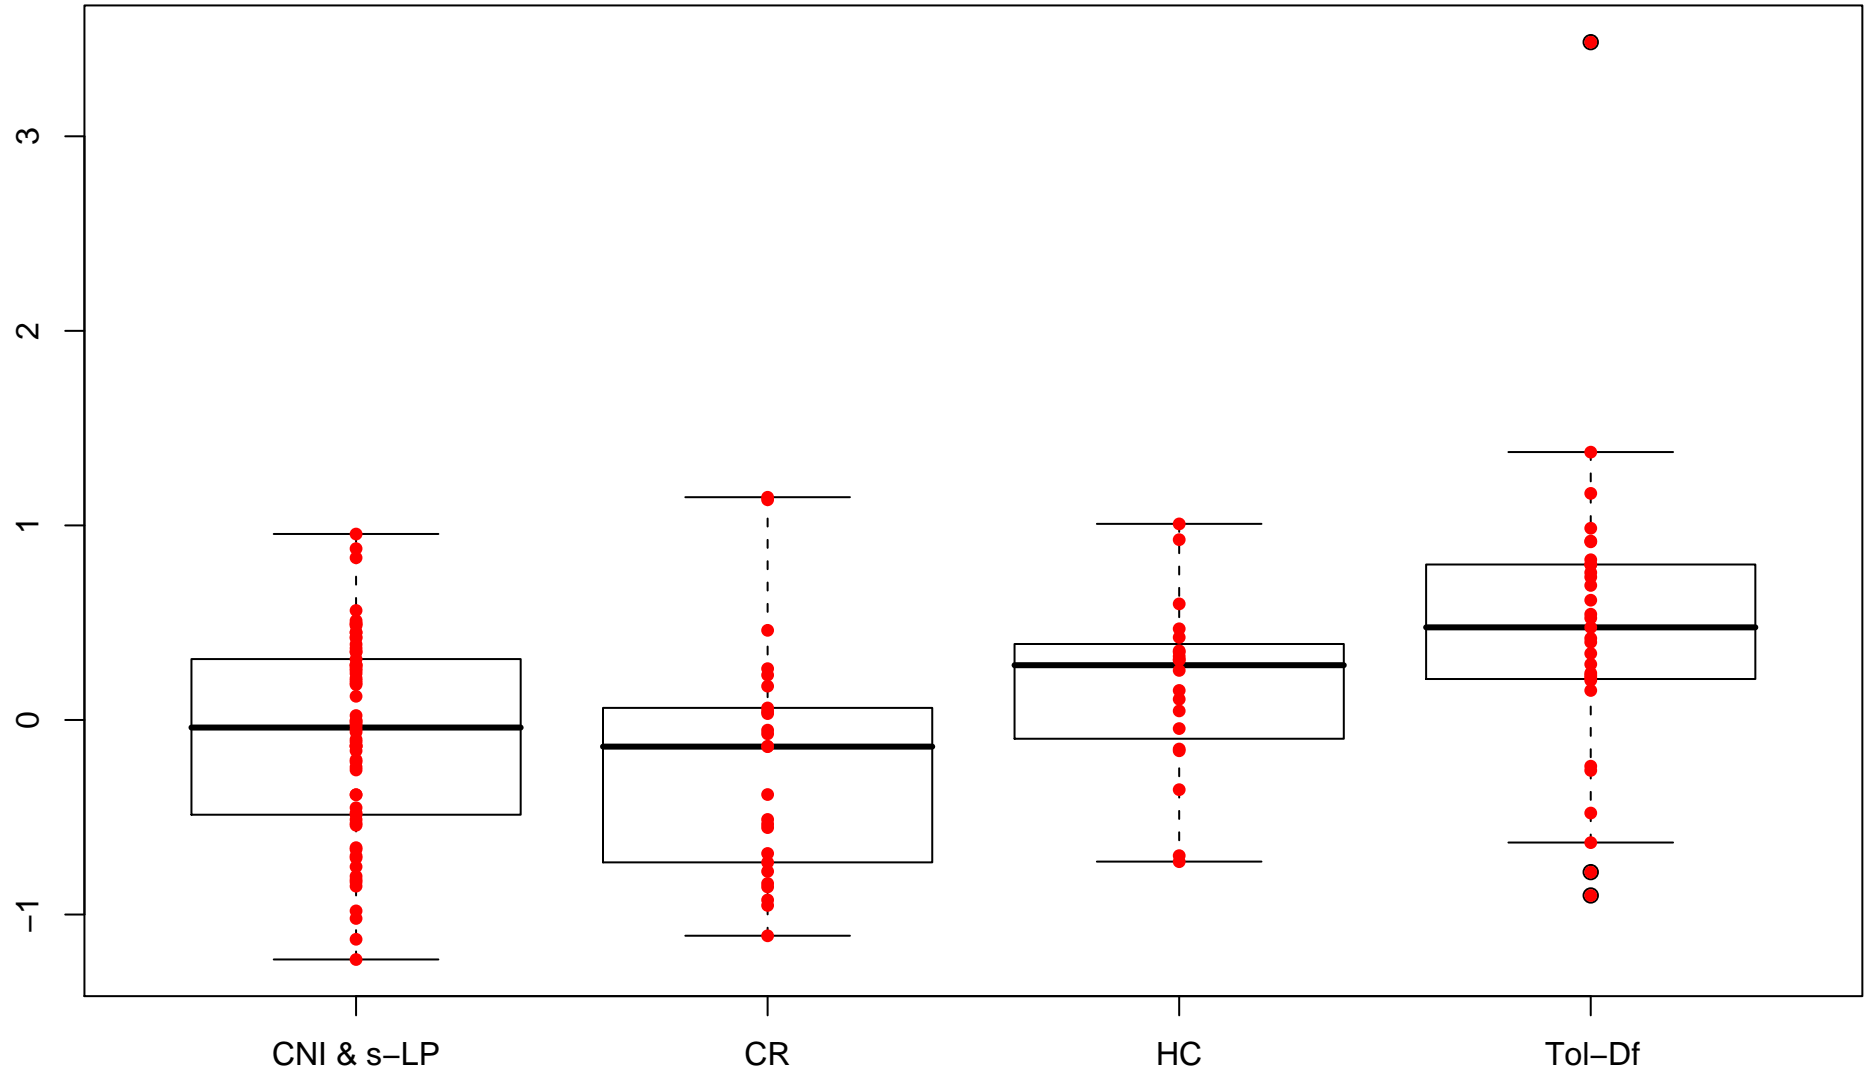

Rank 341 : PRIM1  
5.324e-05

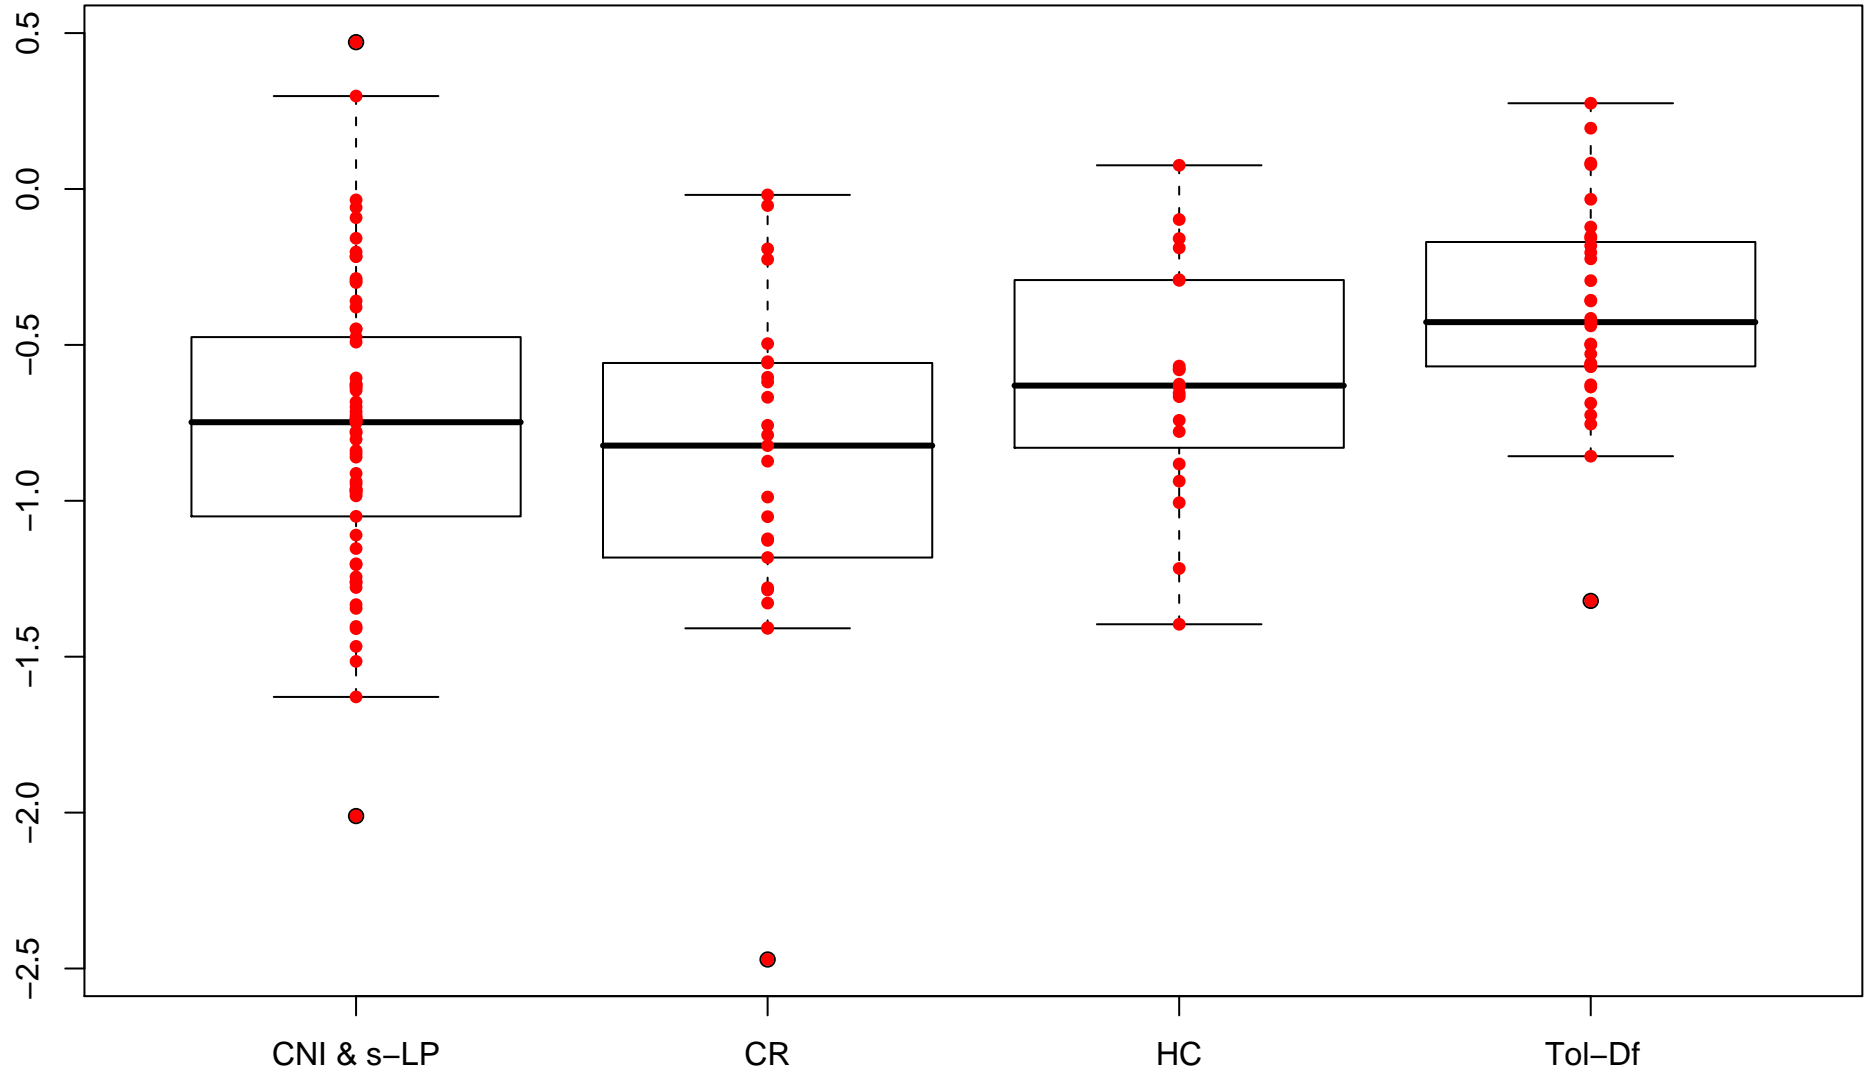

Rank 342 : PRKCH  
5.332e-05

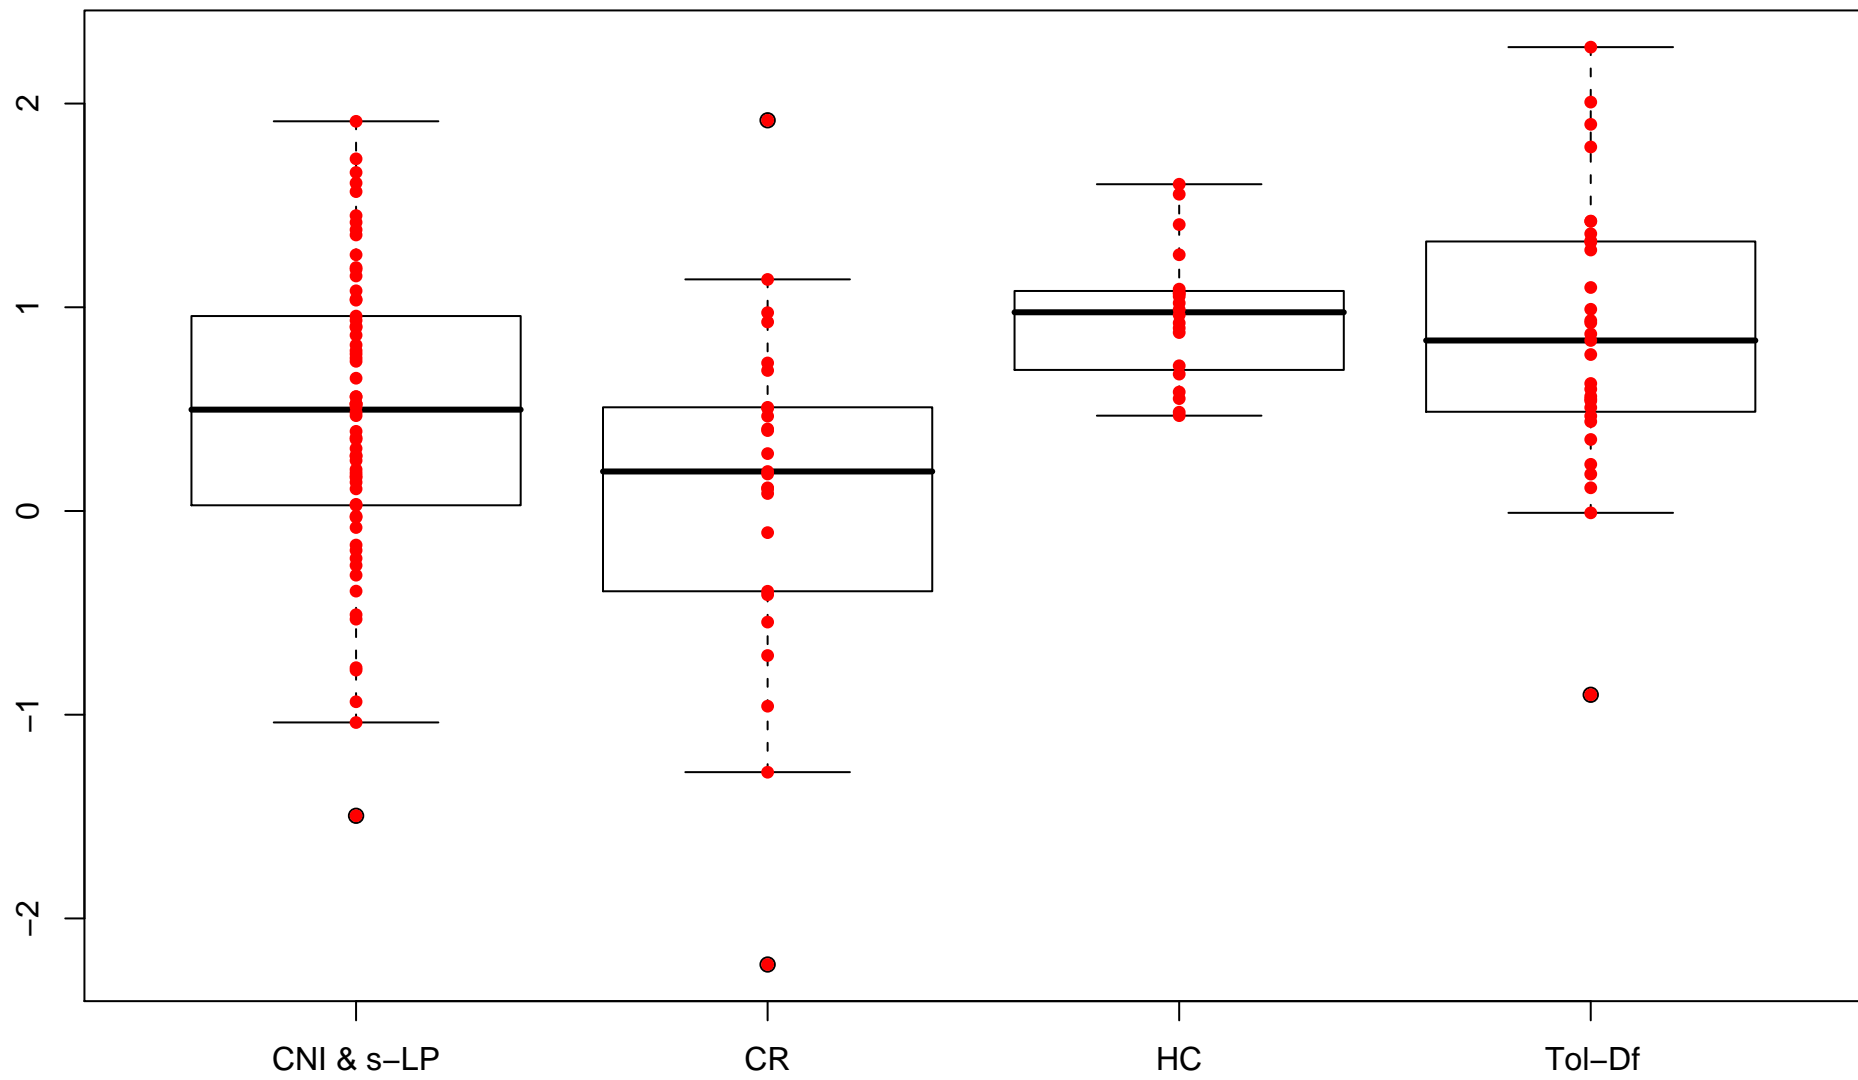

Rank 343 : MAP3K7IP3  
5.376e-05

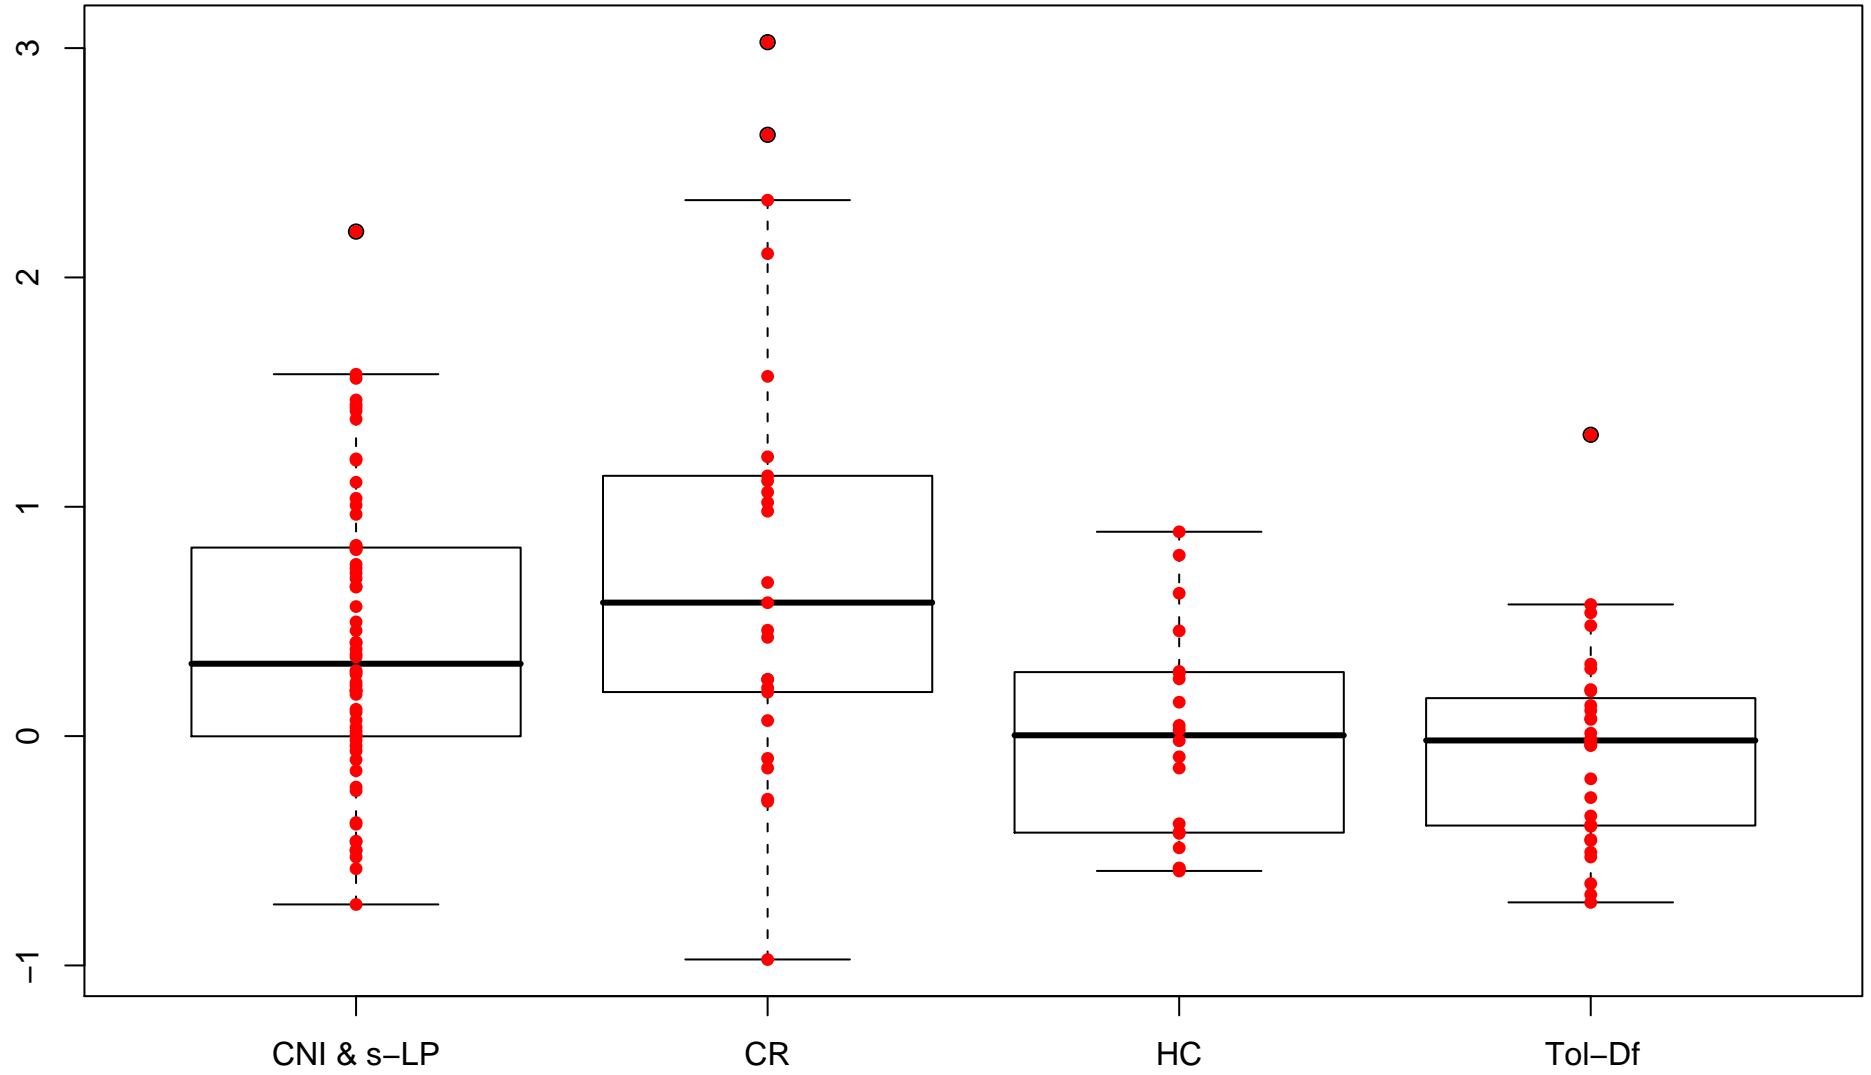



Rank 344 : FAU  
5.395e-05

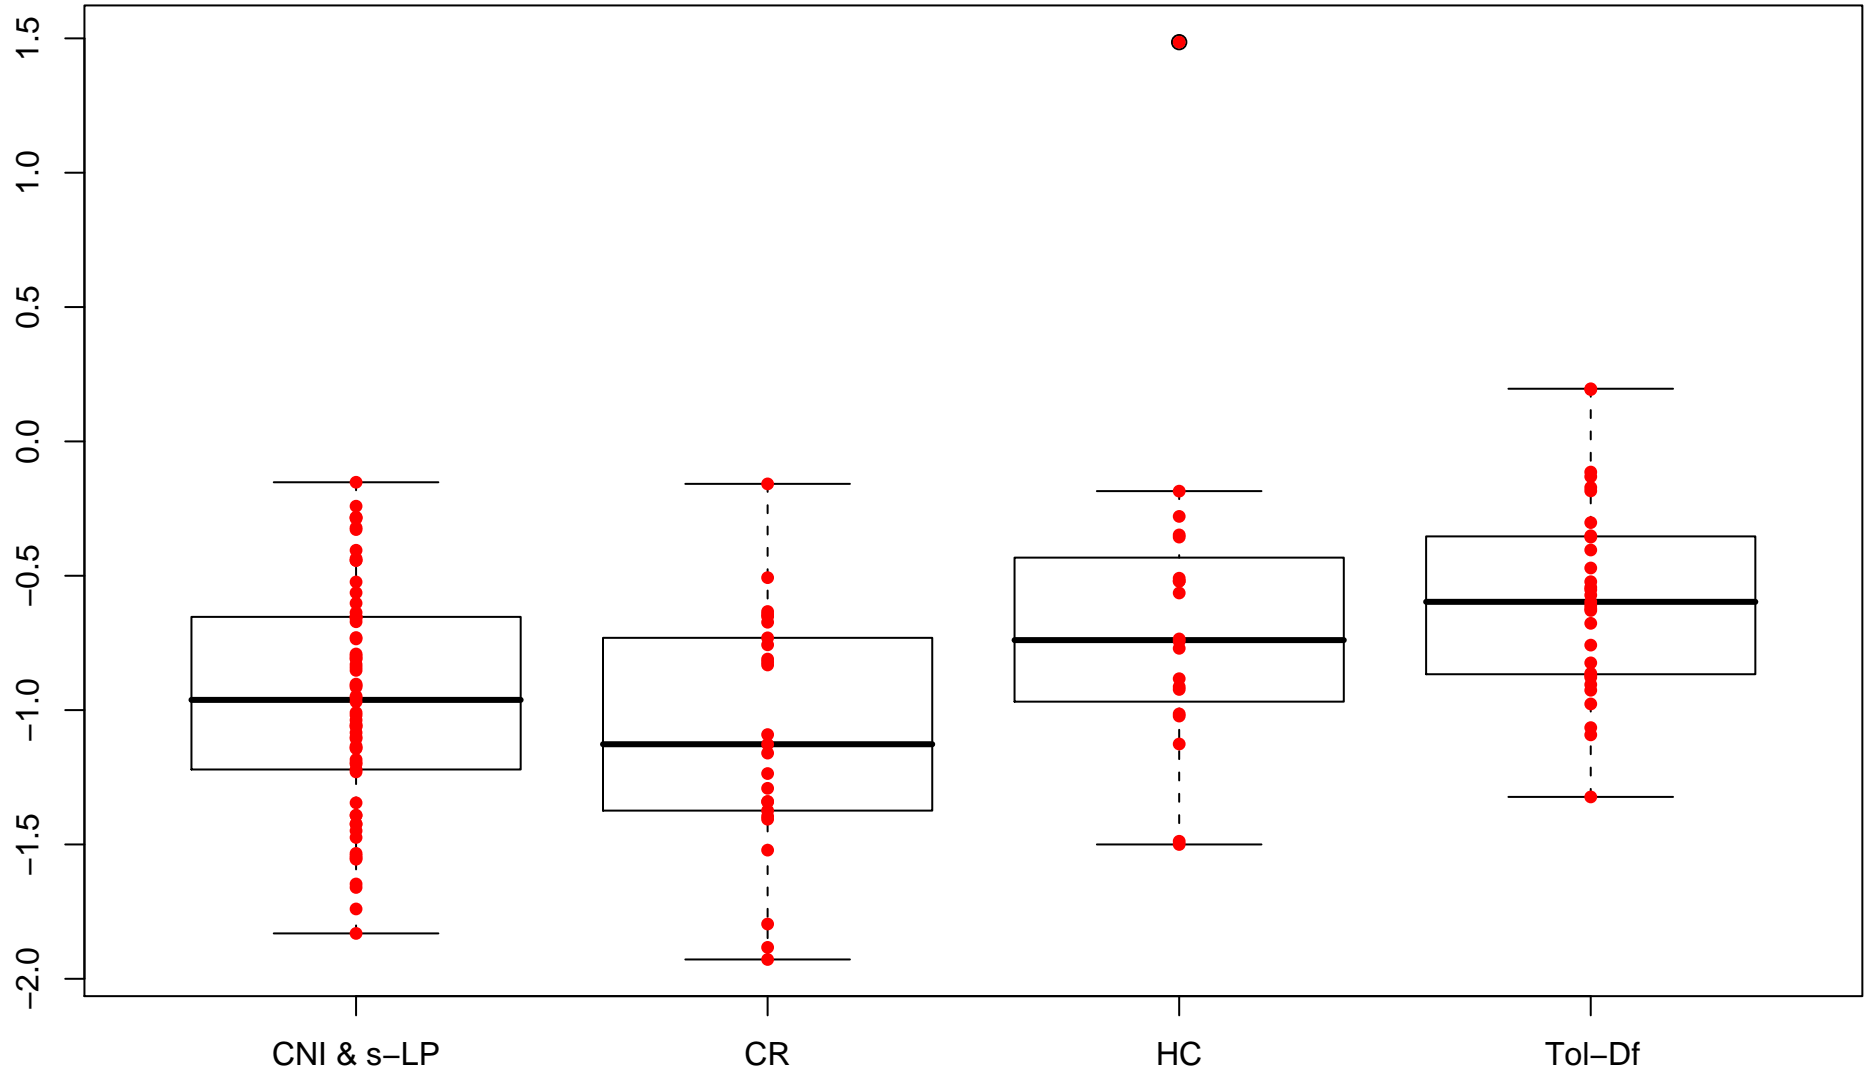

Rank 345 : FLT3  
5.437e-05

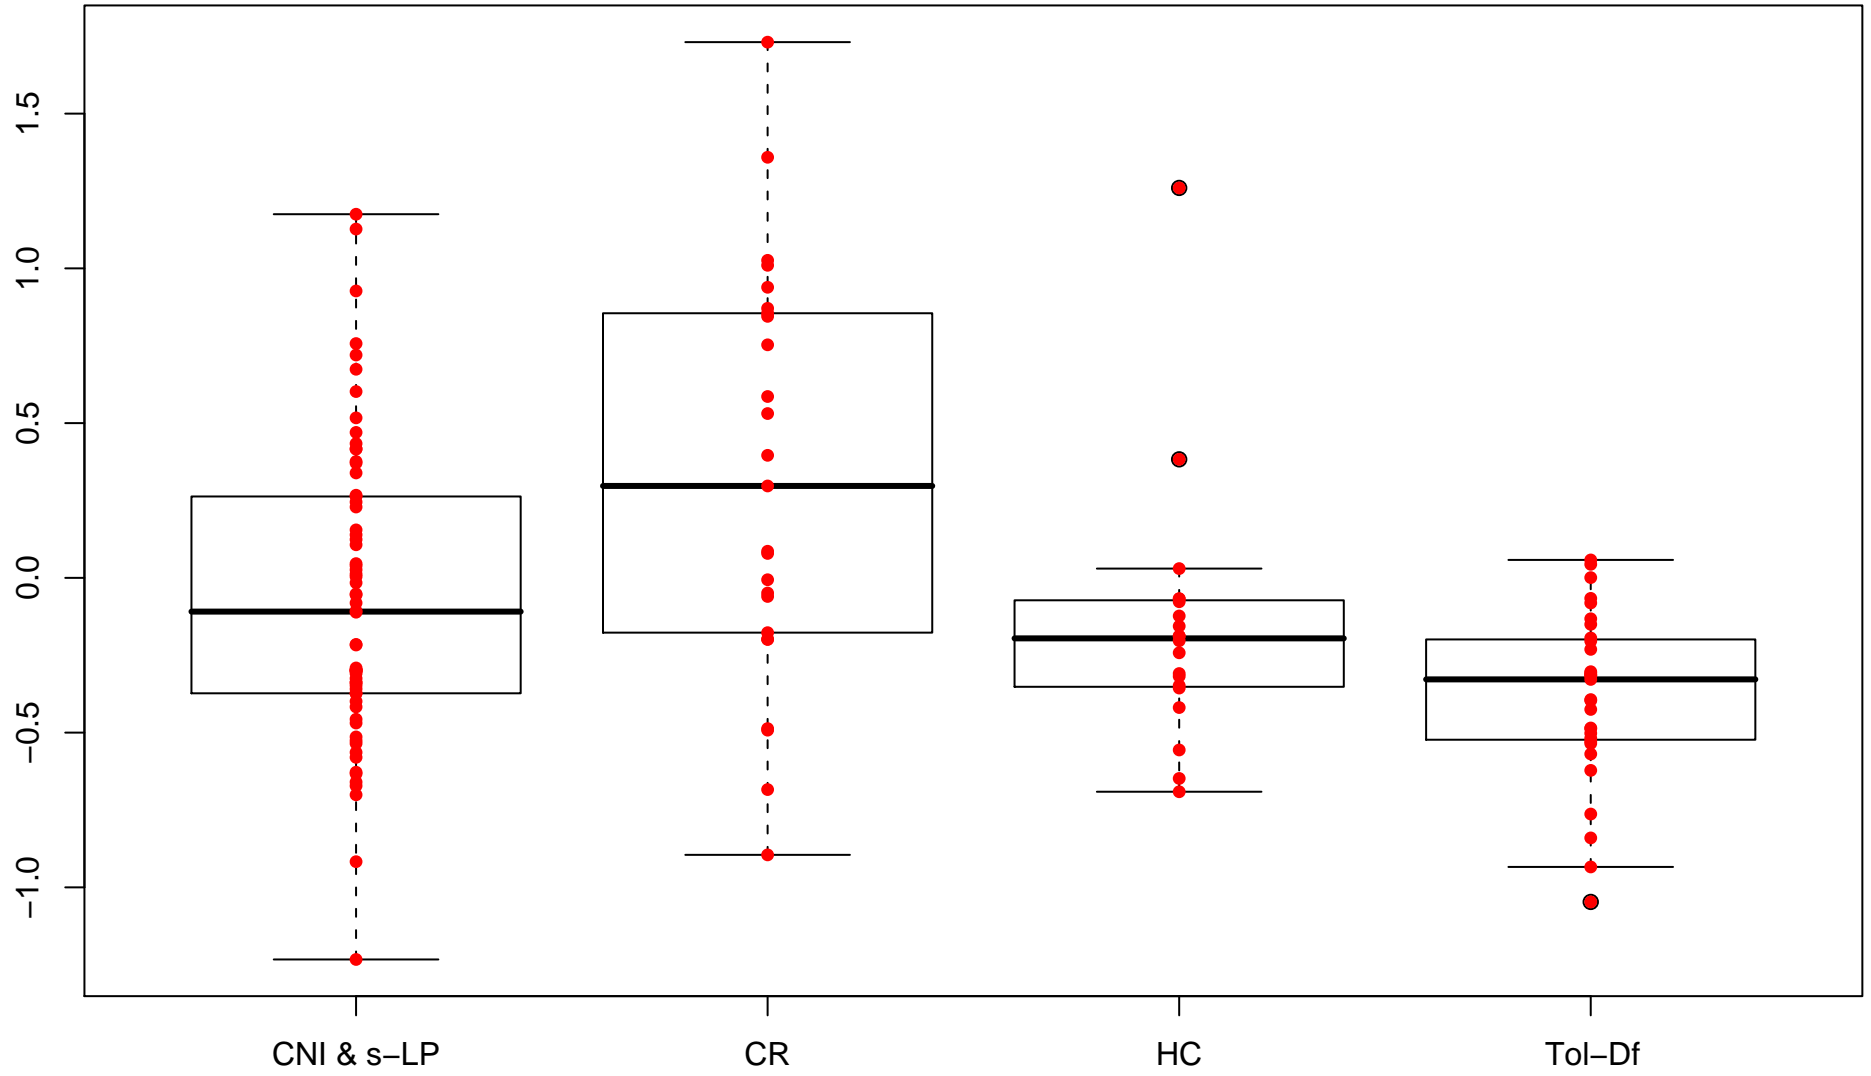

Rank 346 : PLCL2  
5.534e-05

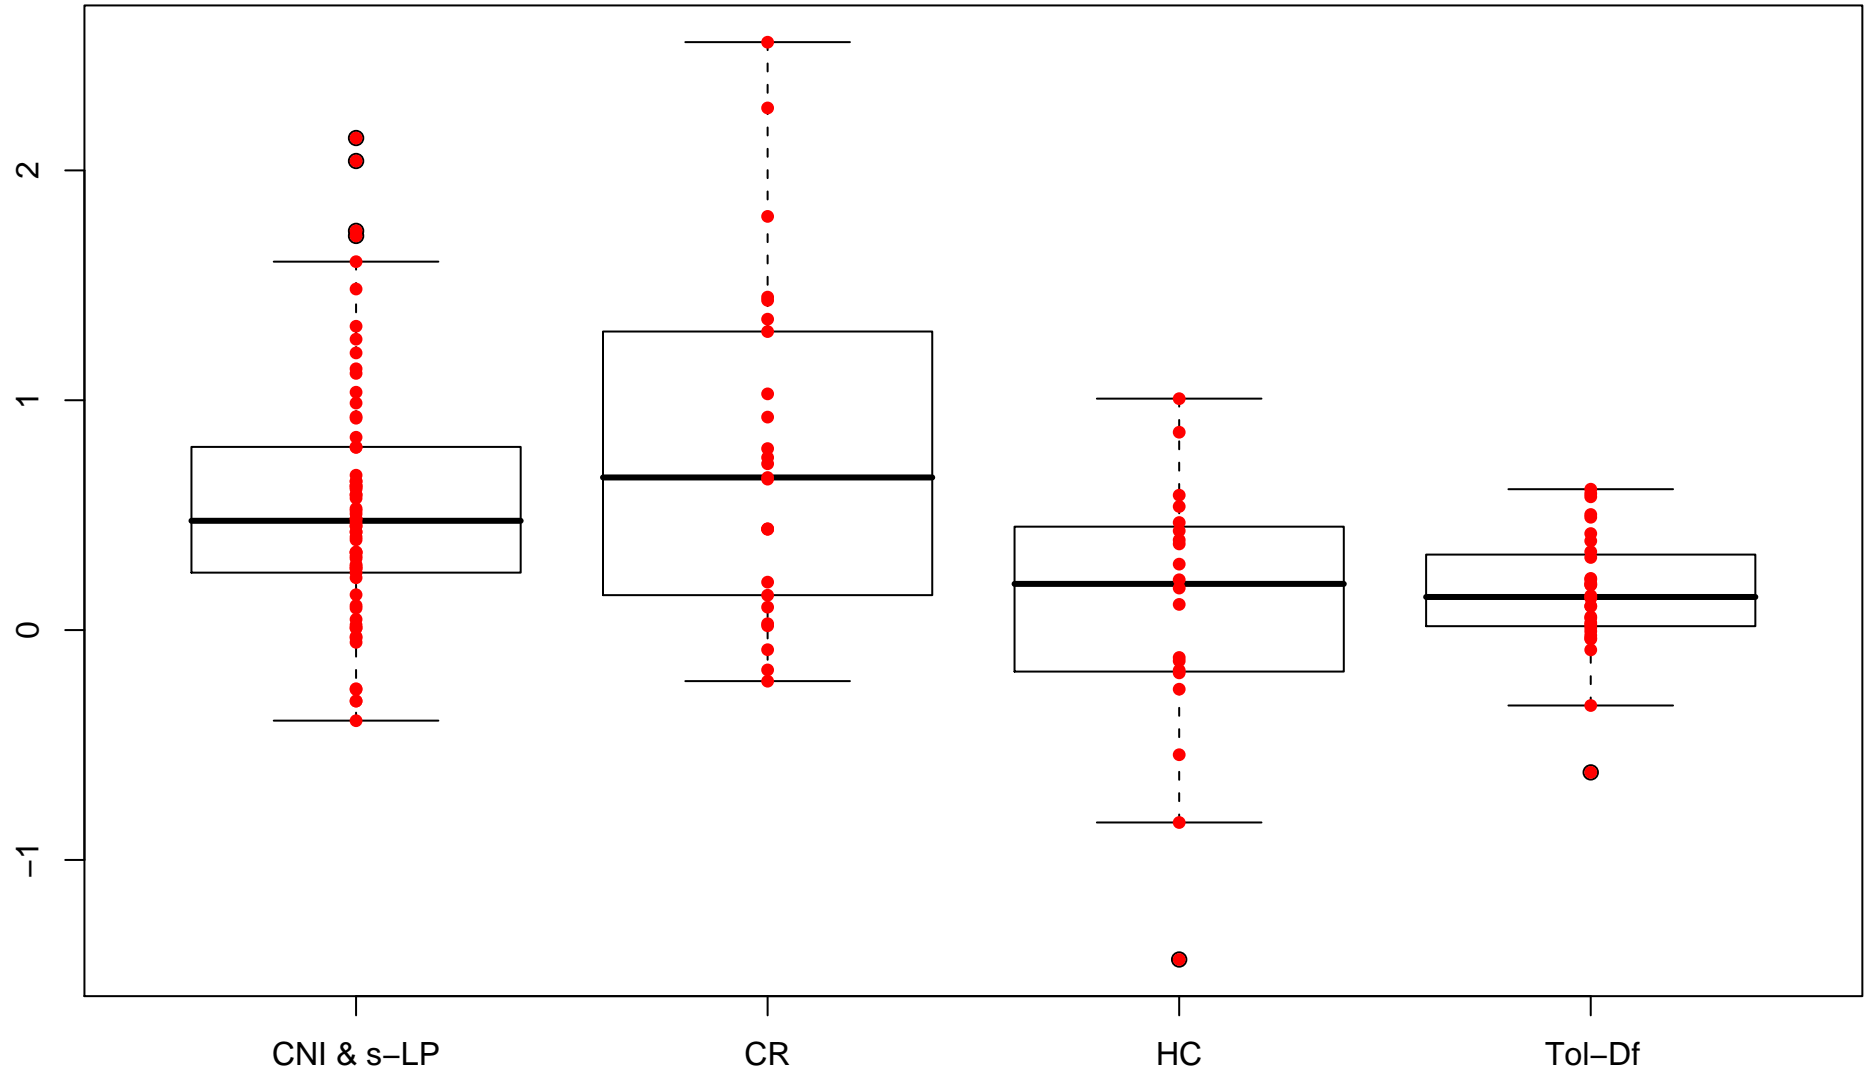

Rank 347 : HSPD1  
5.567e-05

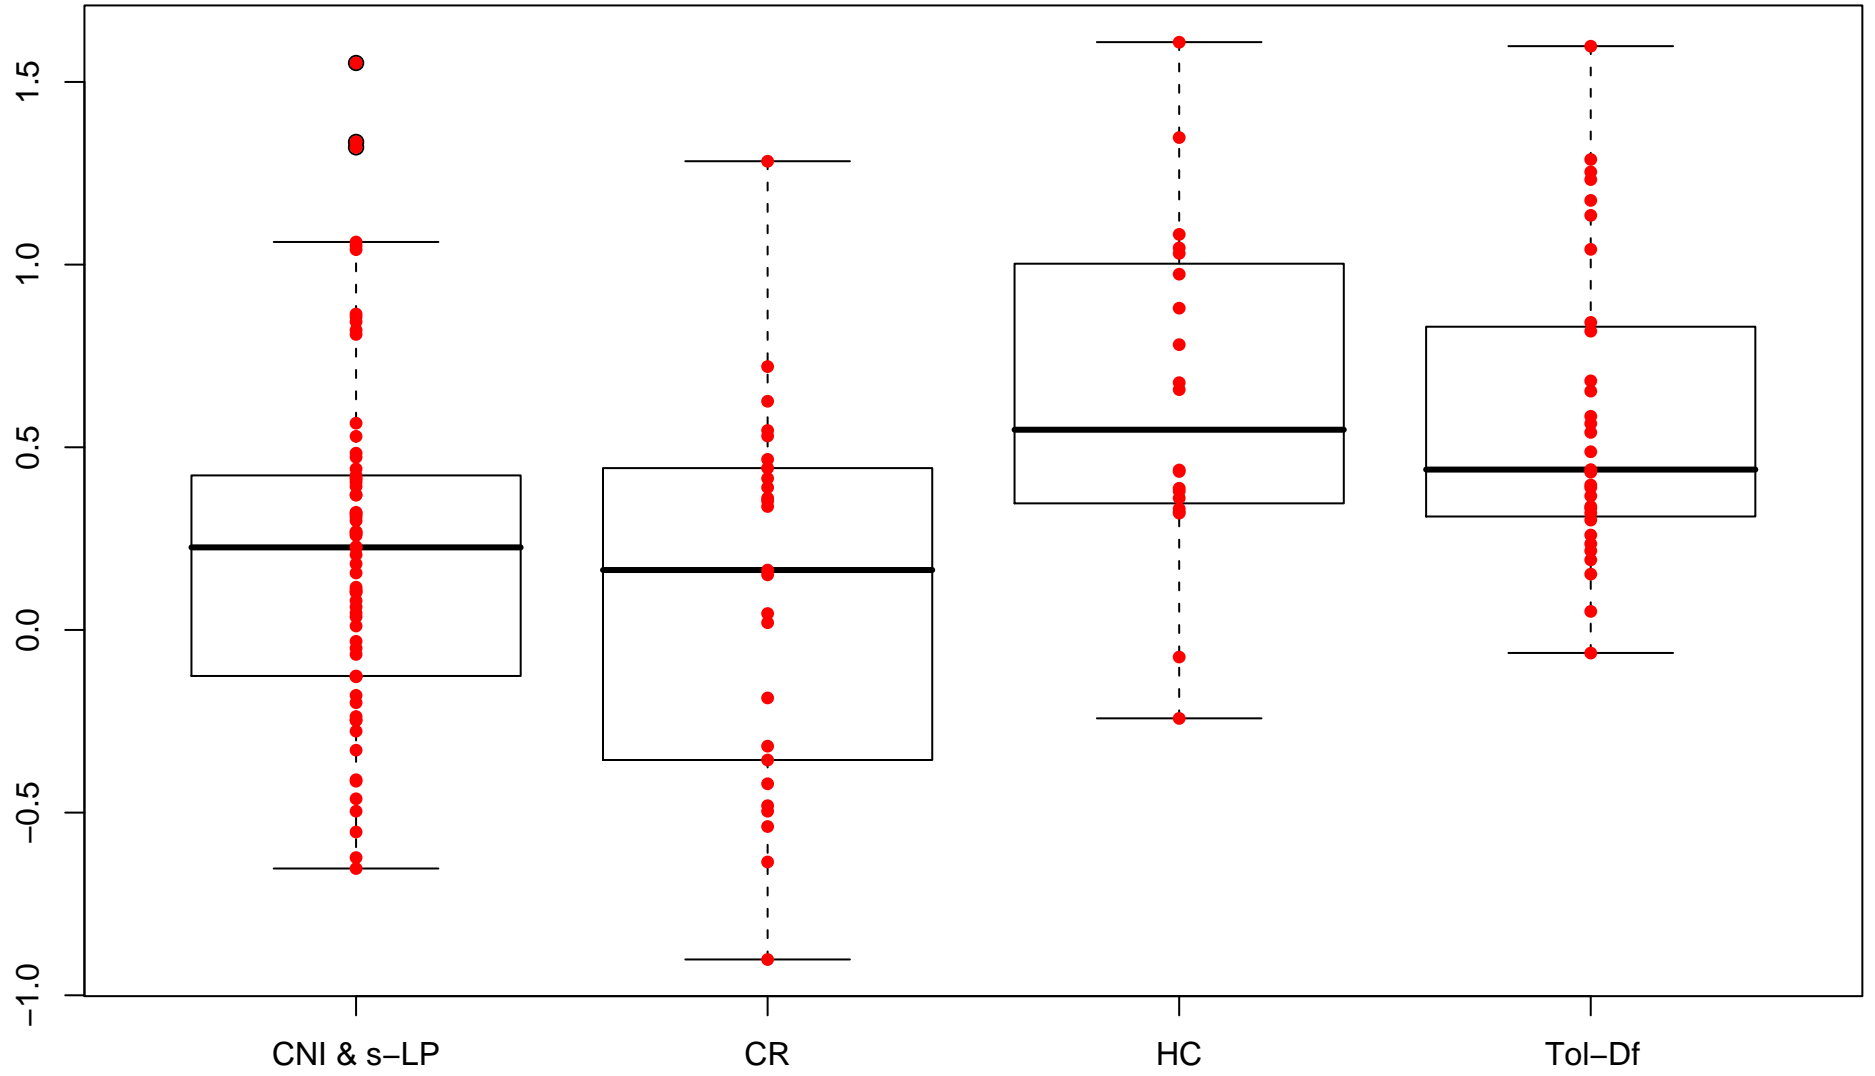

Rank 348 : ACTN4  
5.619e-05

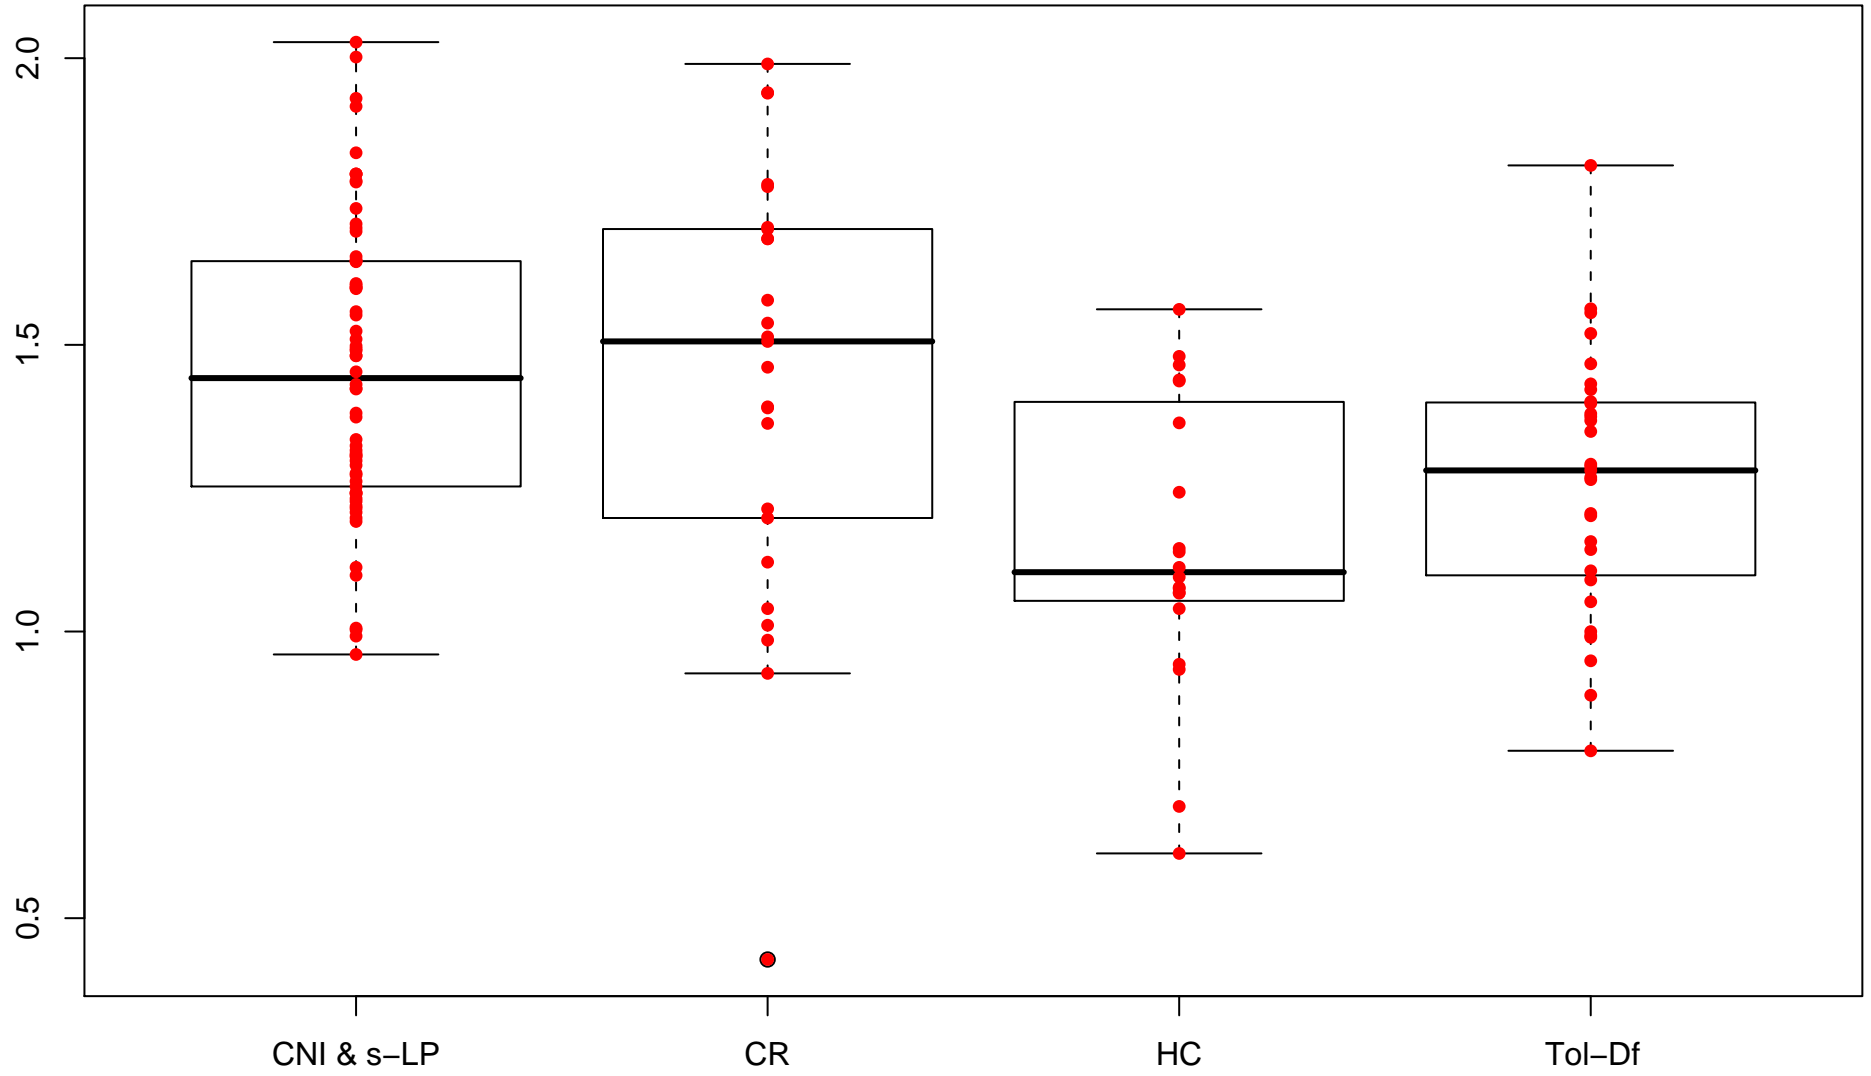

Rank 349 : TXNDC9  
5.694e-05

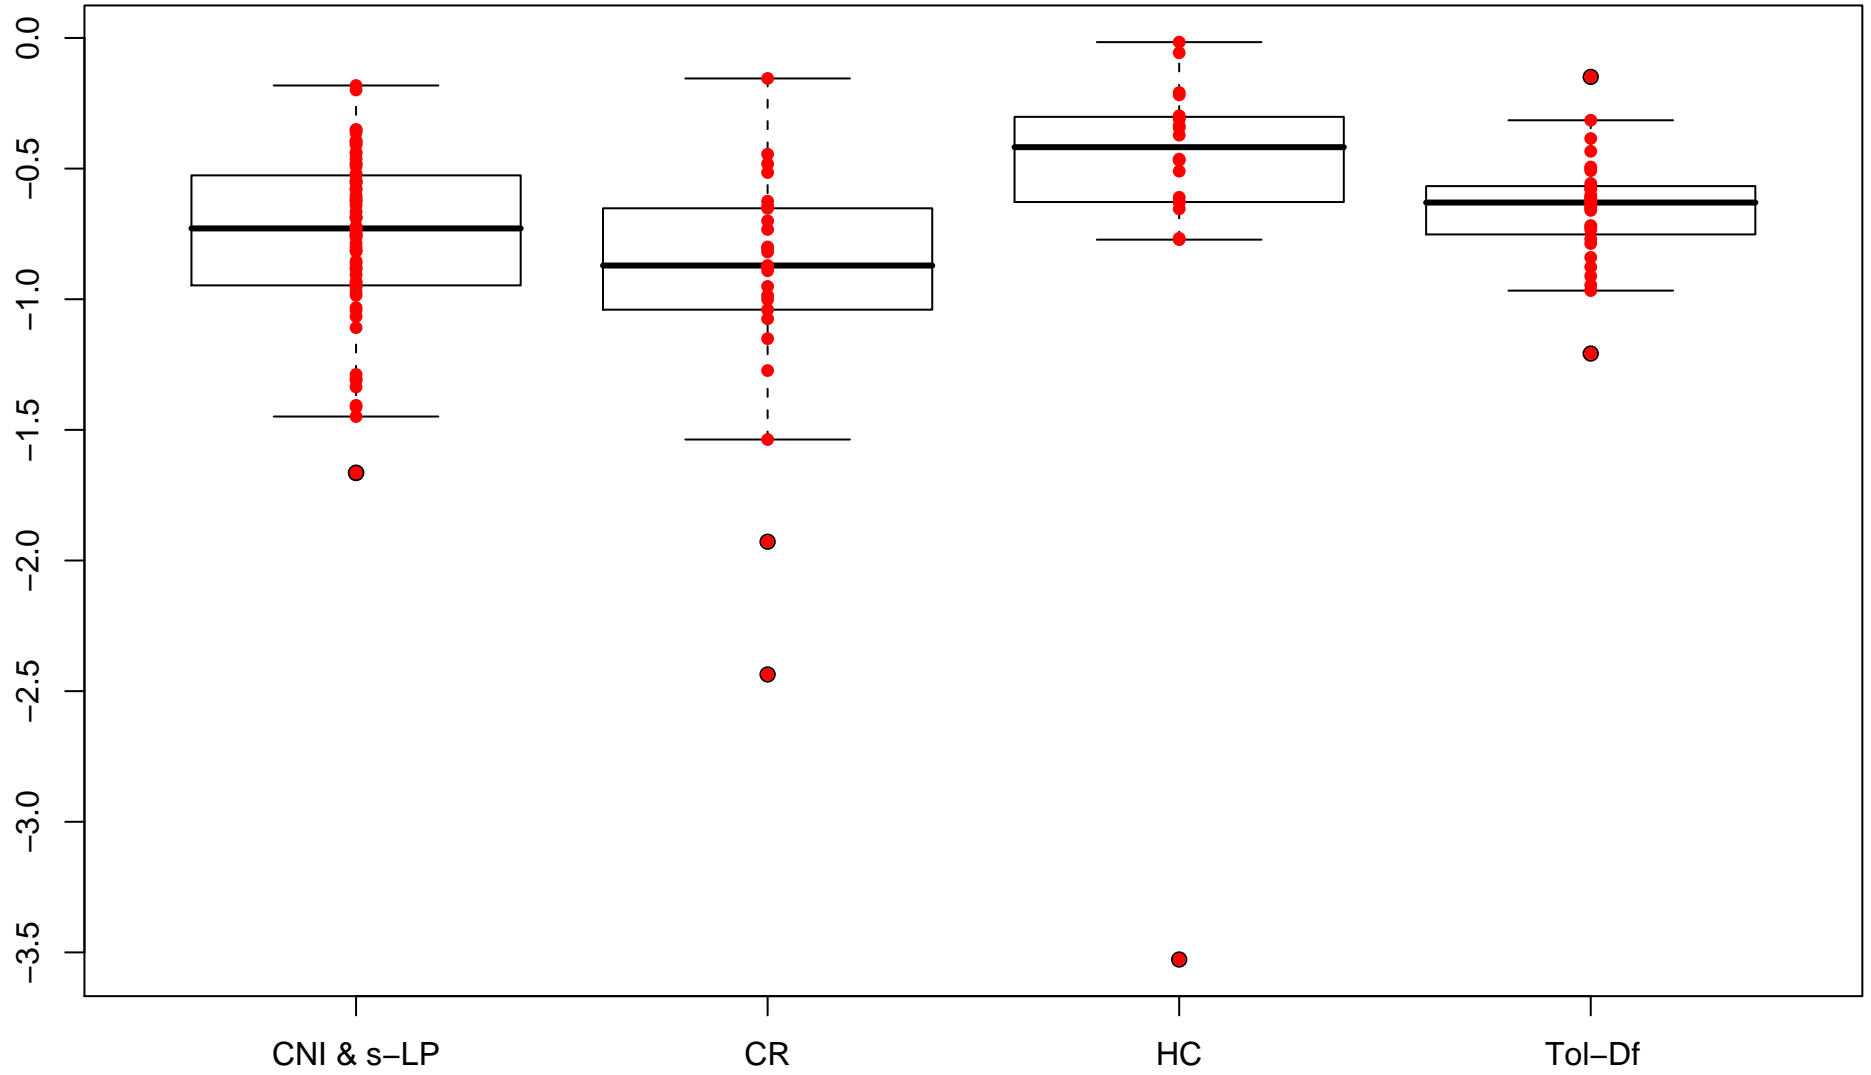

Rank 350 : THC2432515  
5.778e-05

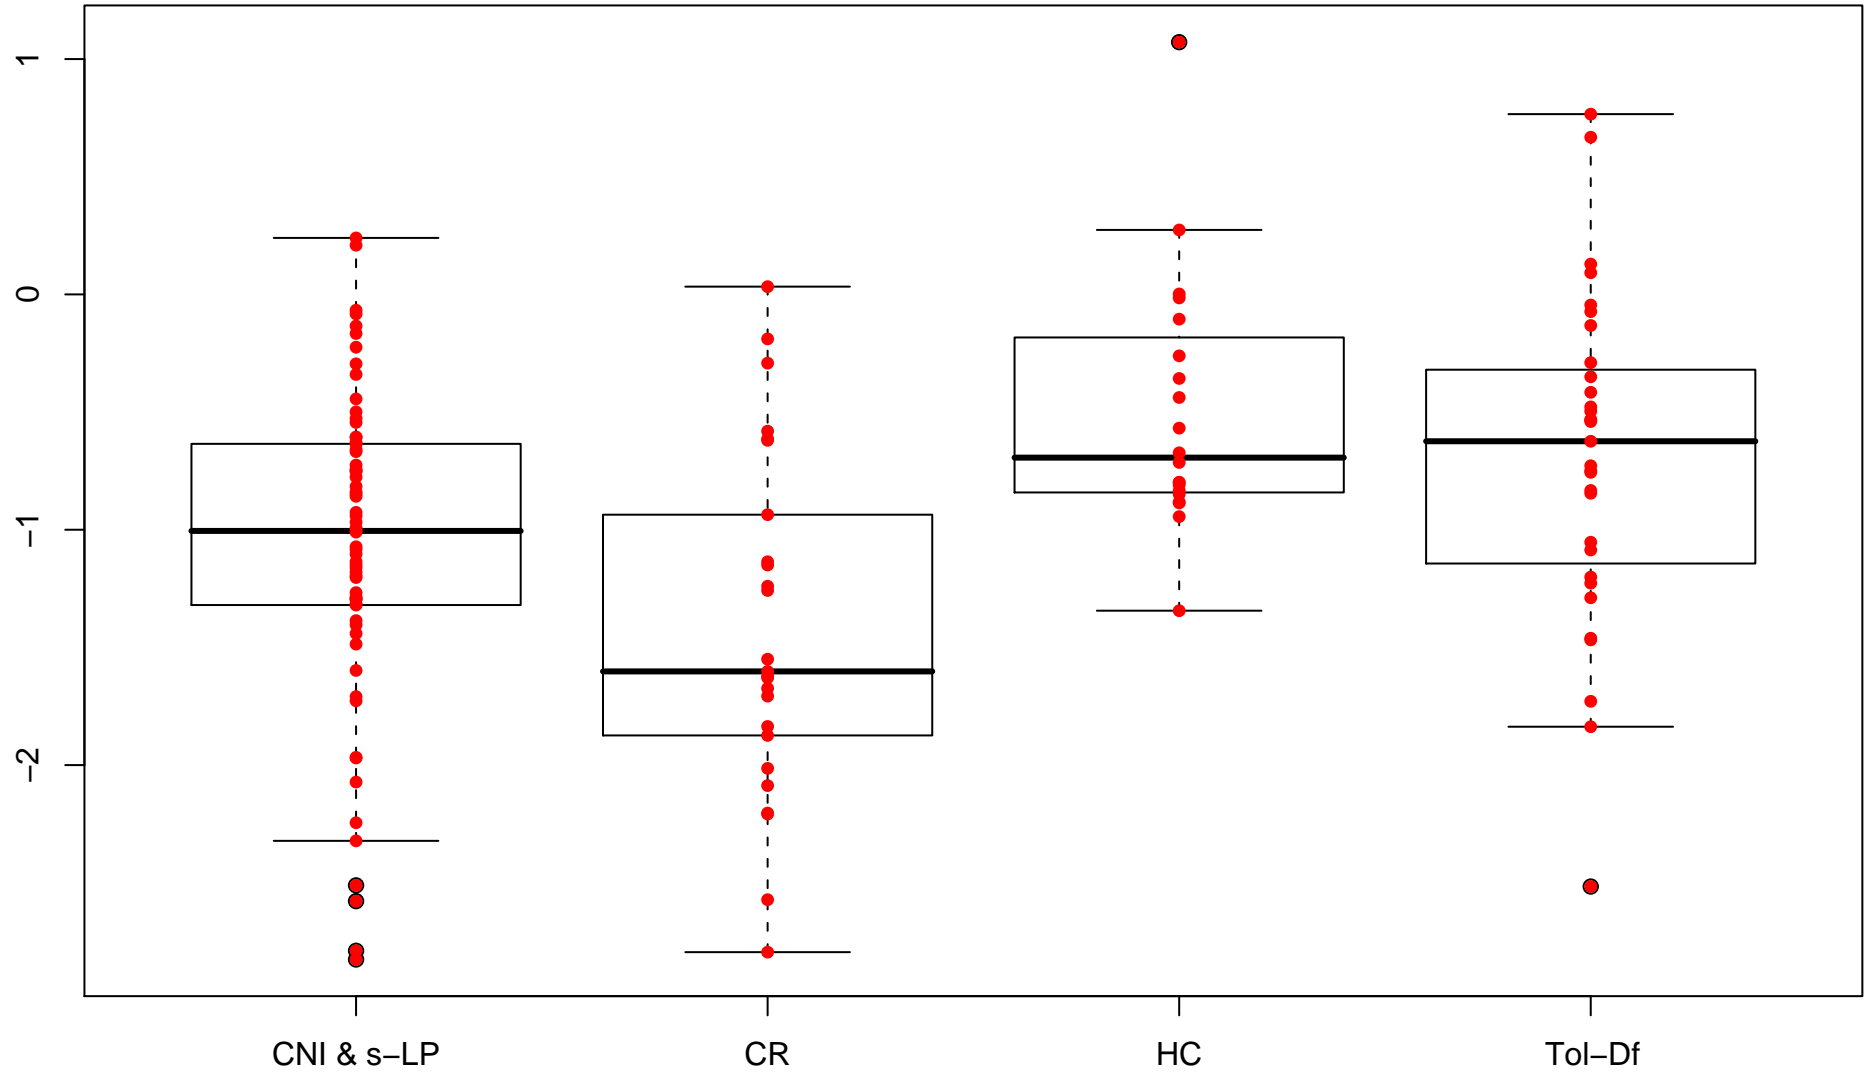

Rank 351 : ZWILCH  
5.86e-05

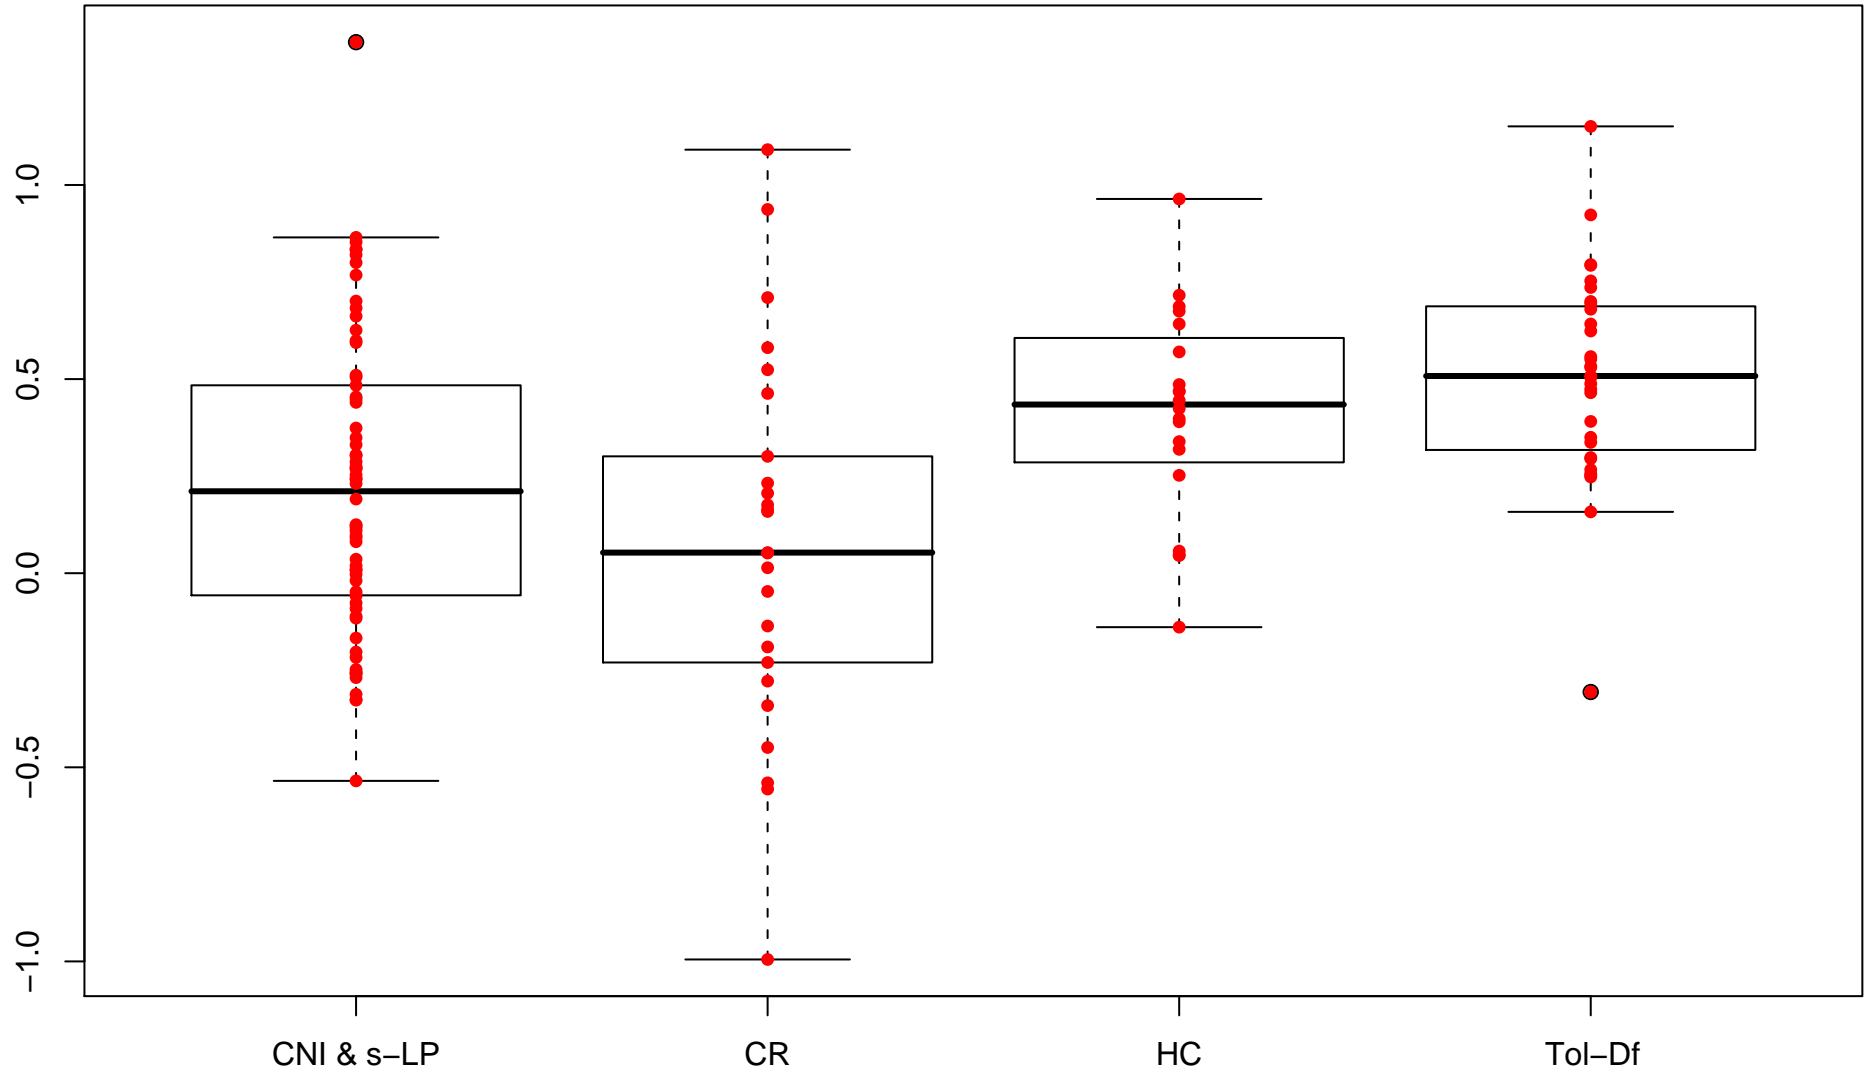



Rank 352 : SH2D1B  
5.869e-05

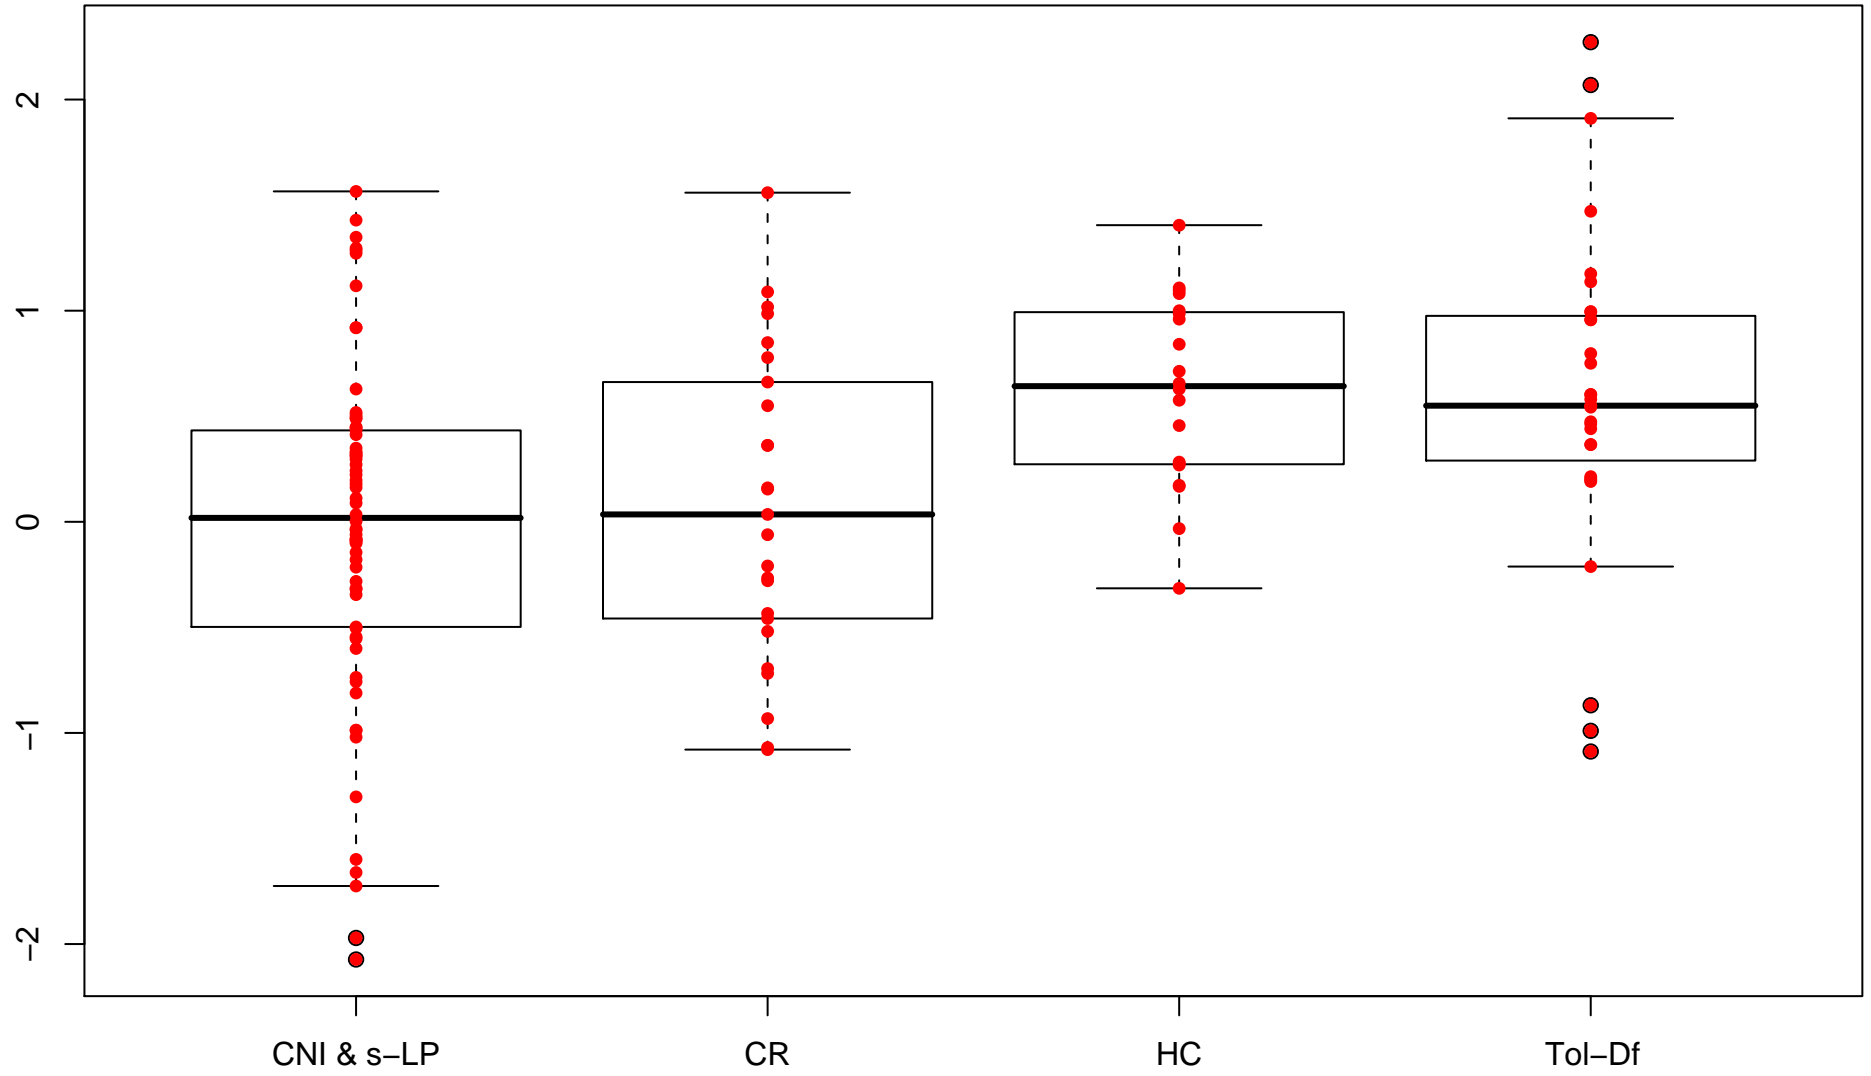

Rank 353 : CAMP  
5.929e-05

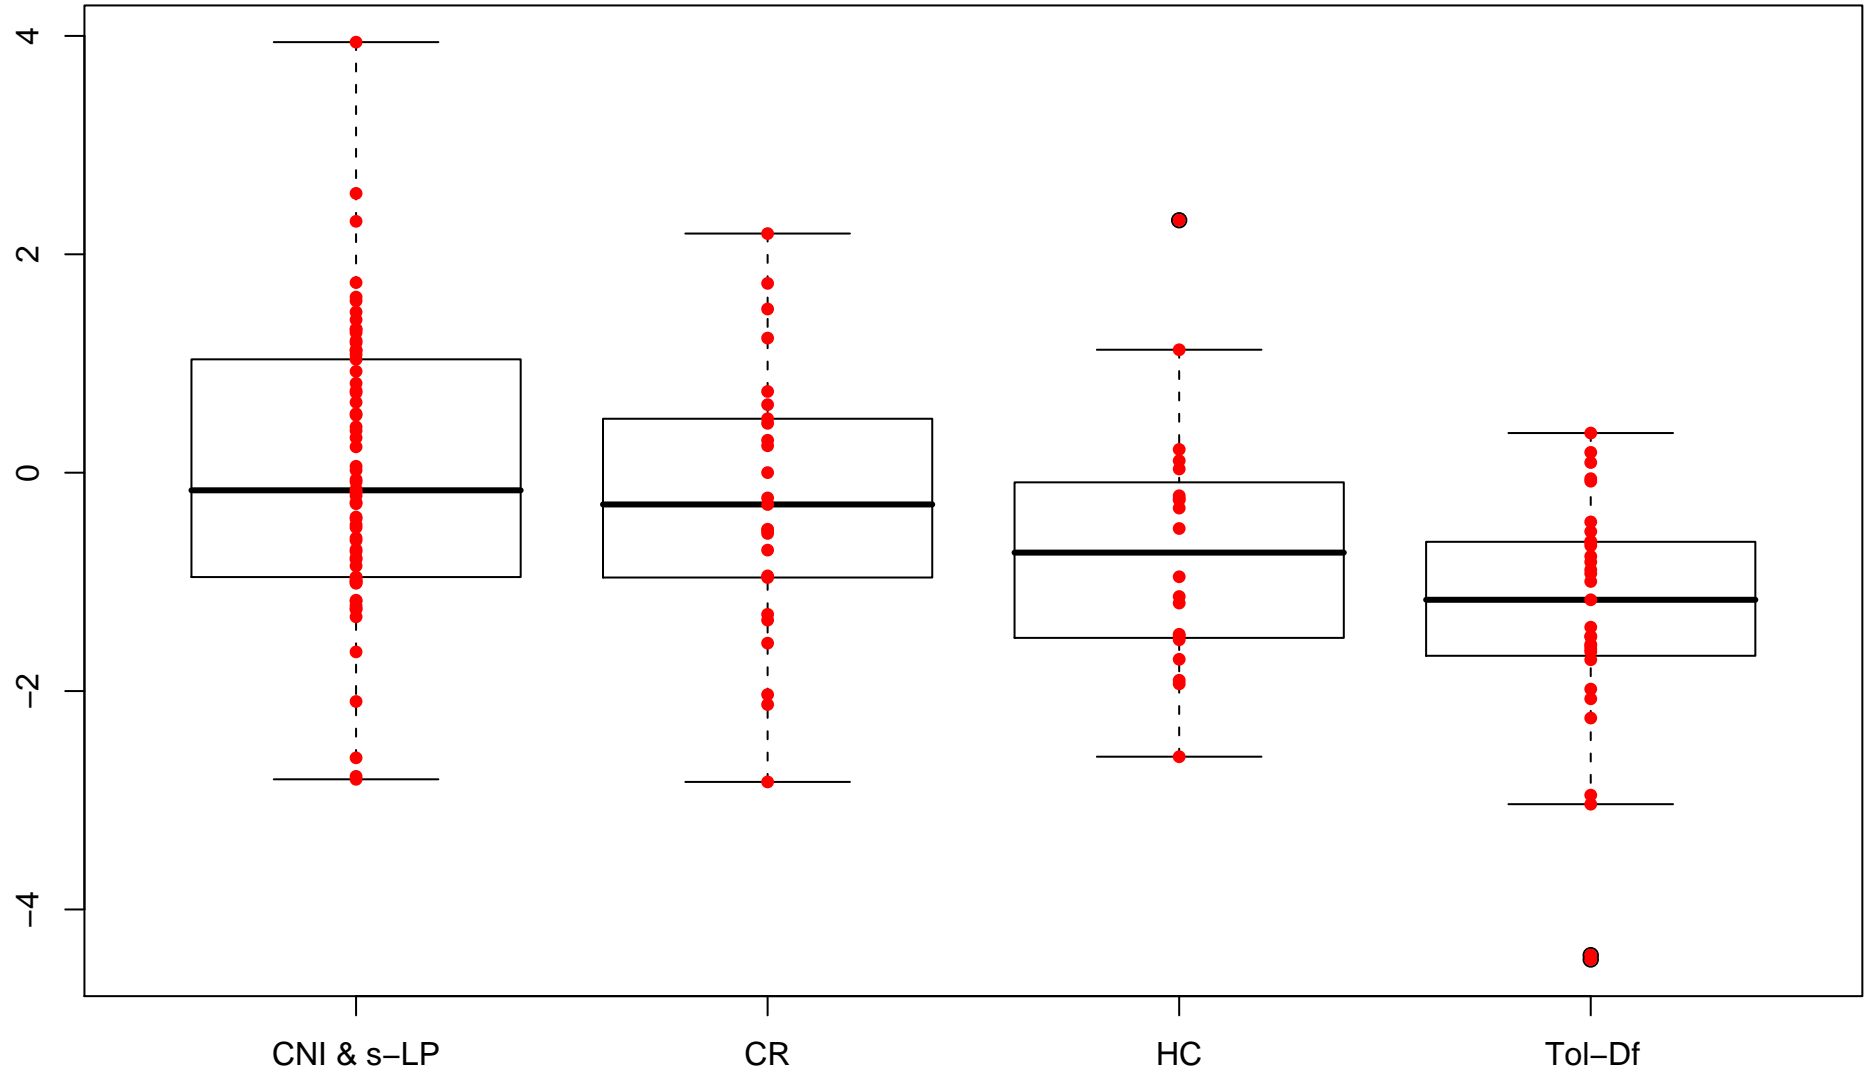

Rank 354 : TUBB;TUBB2A  
5.947e-05

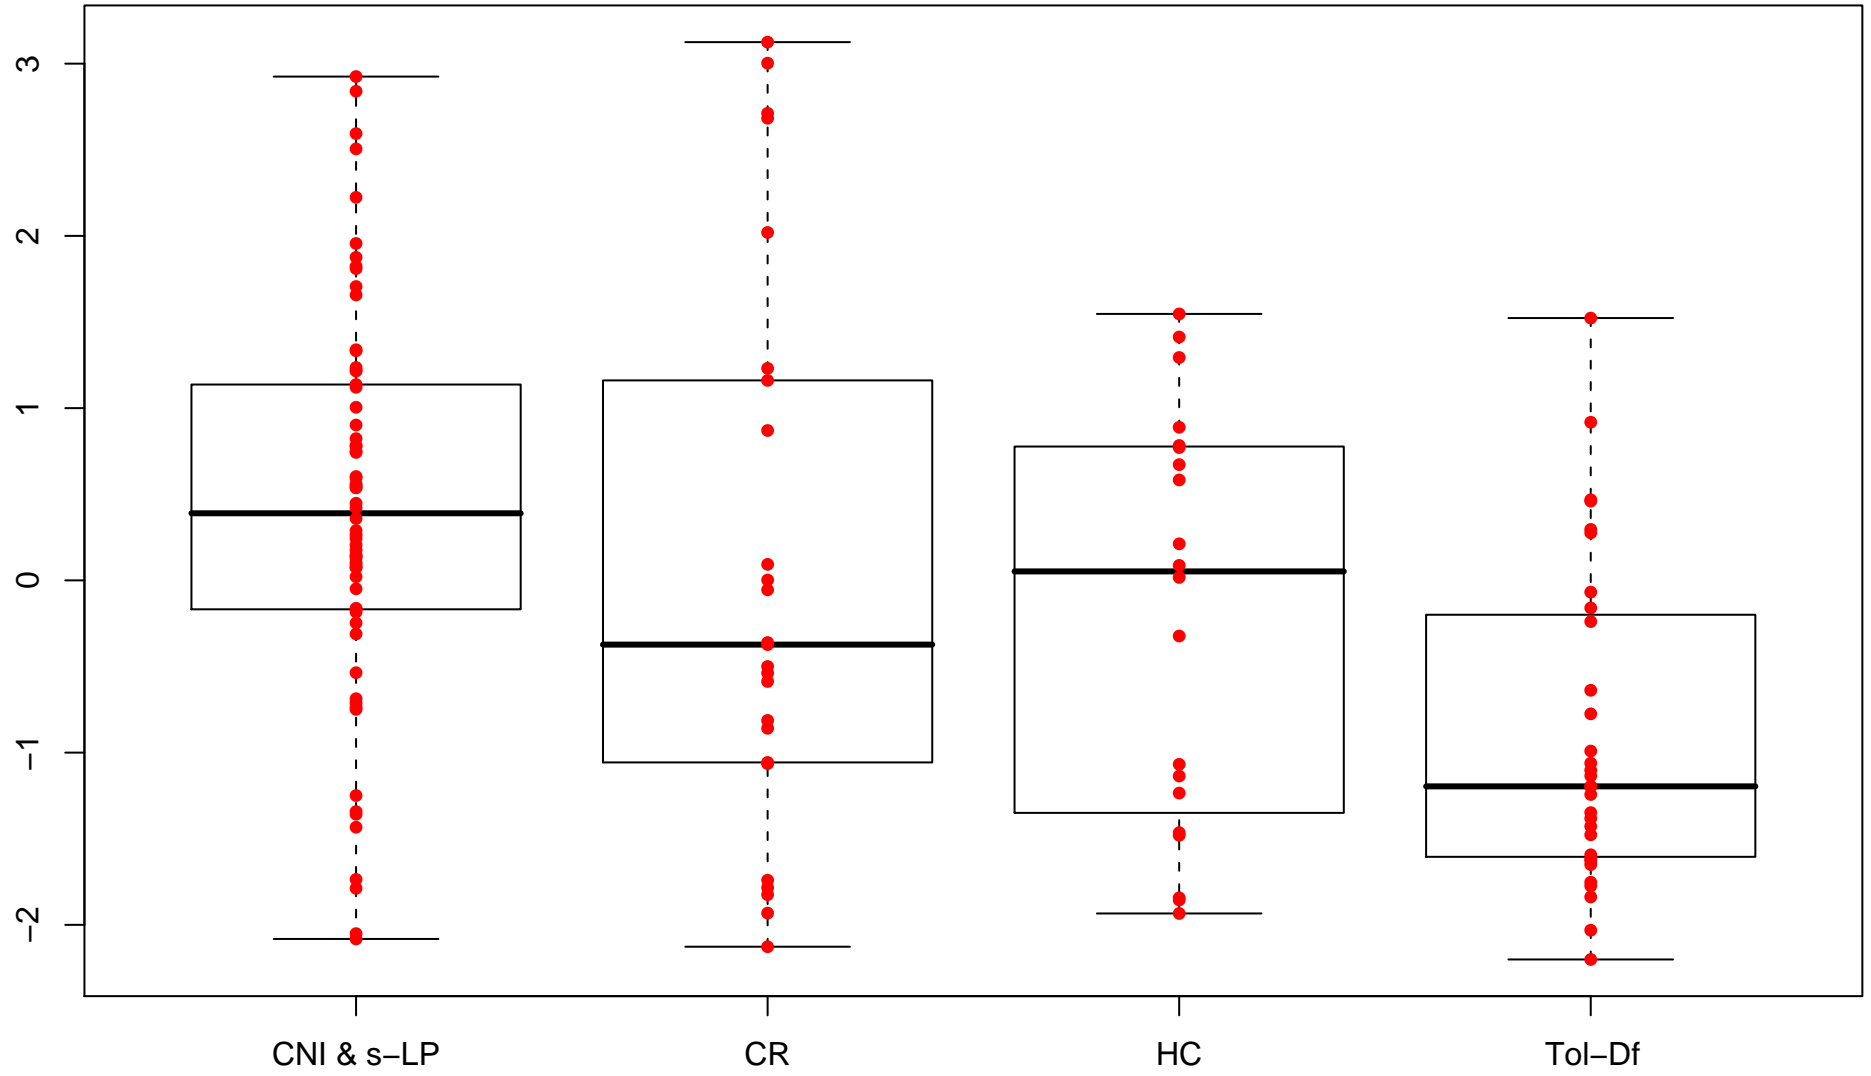

Rank 355 : AKAP1  
5.977e-05

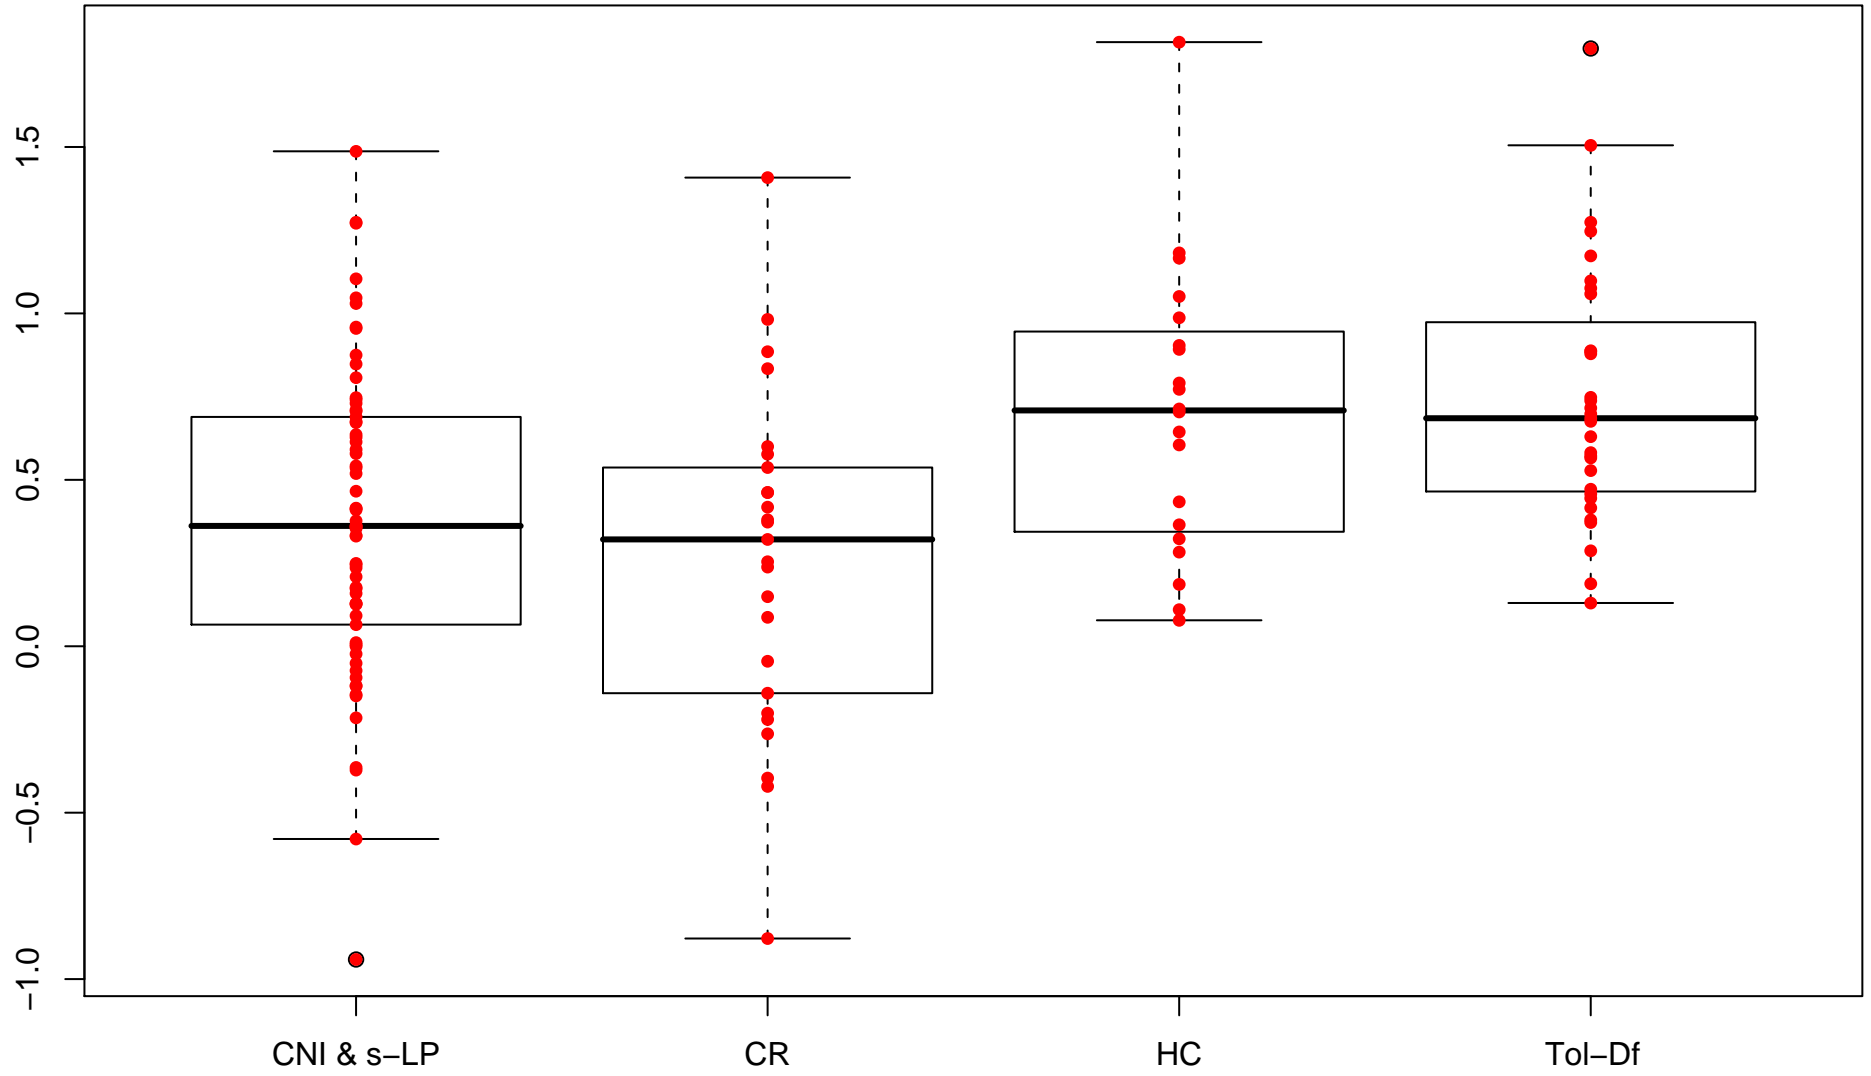

Rank 356 : DTNBP1  
6.002e-05

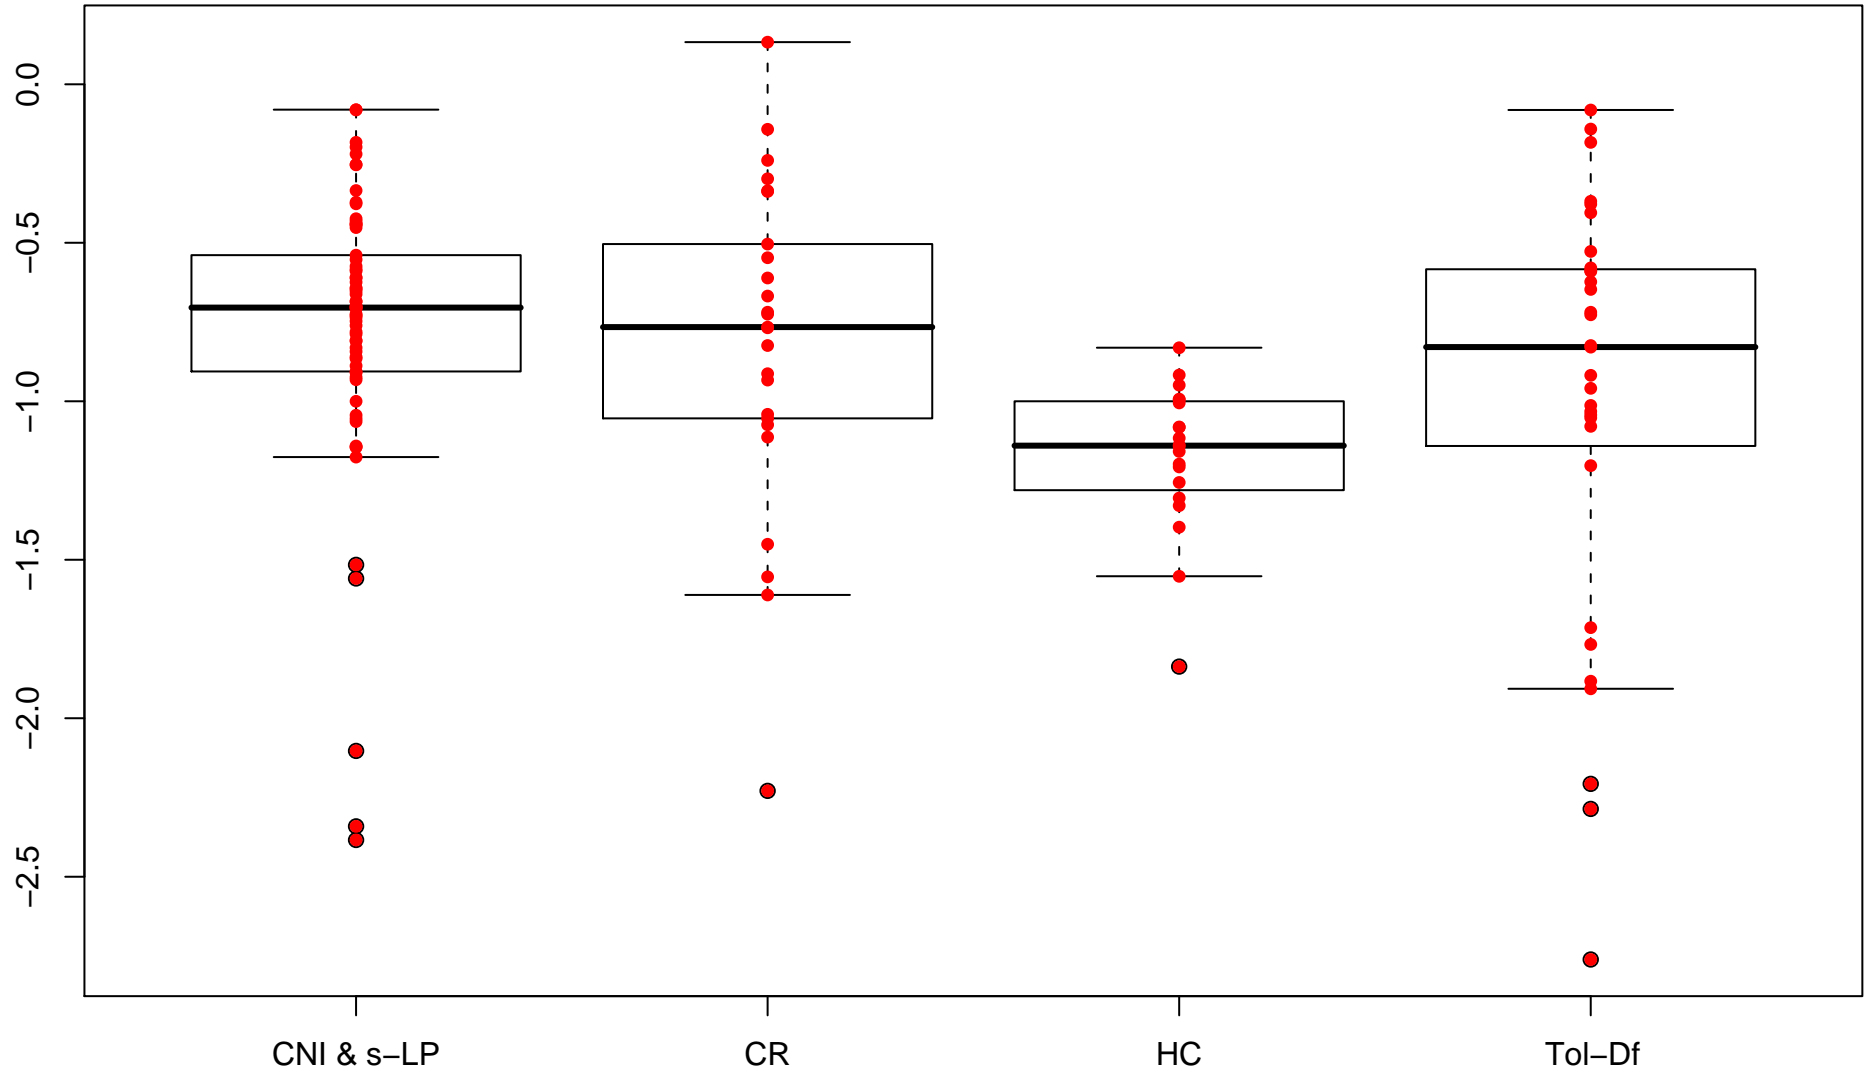

Rank 357 : ADD3  
6.007e-05

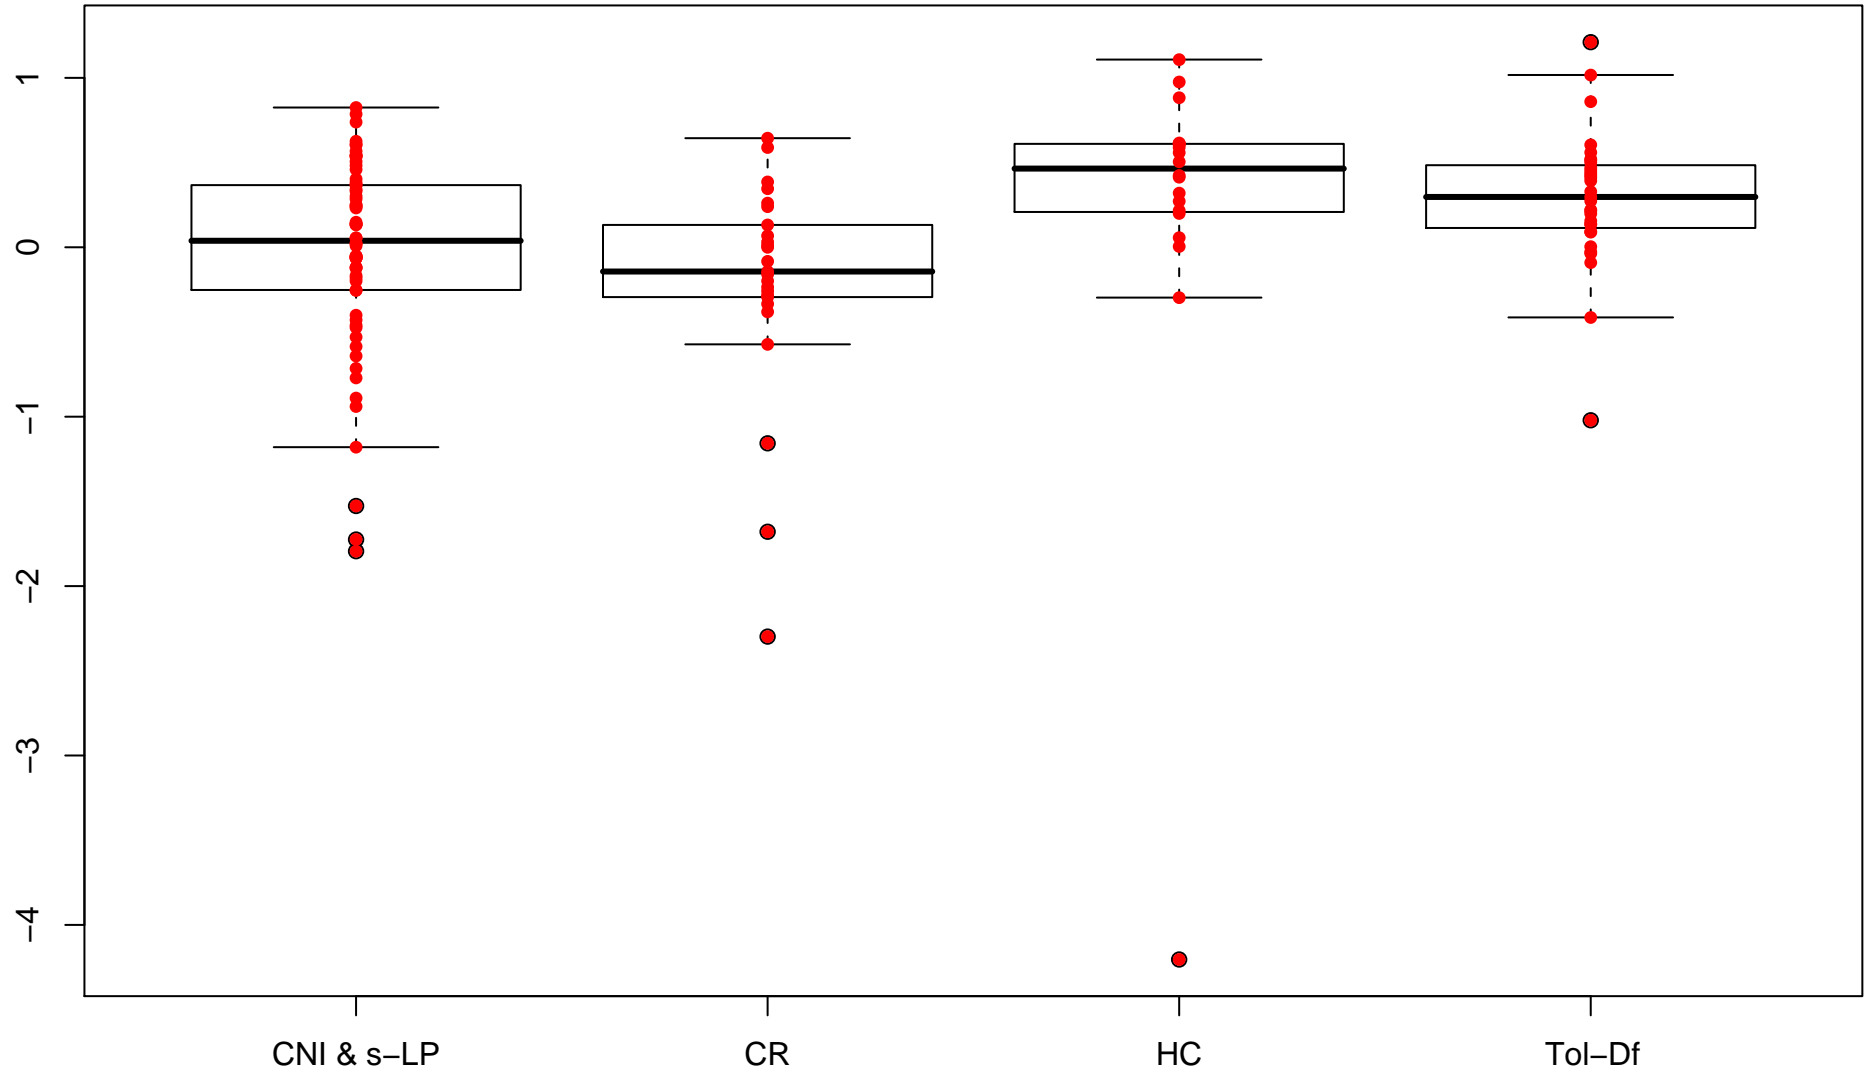

Rank 358 : ZNF573  
6.09e-05

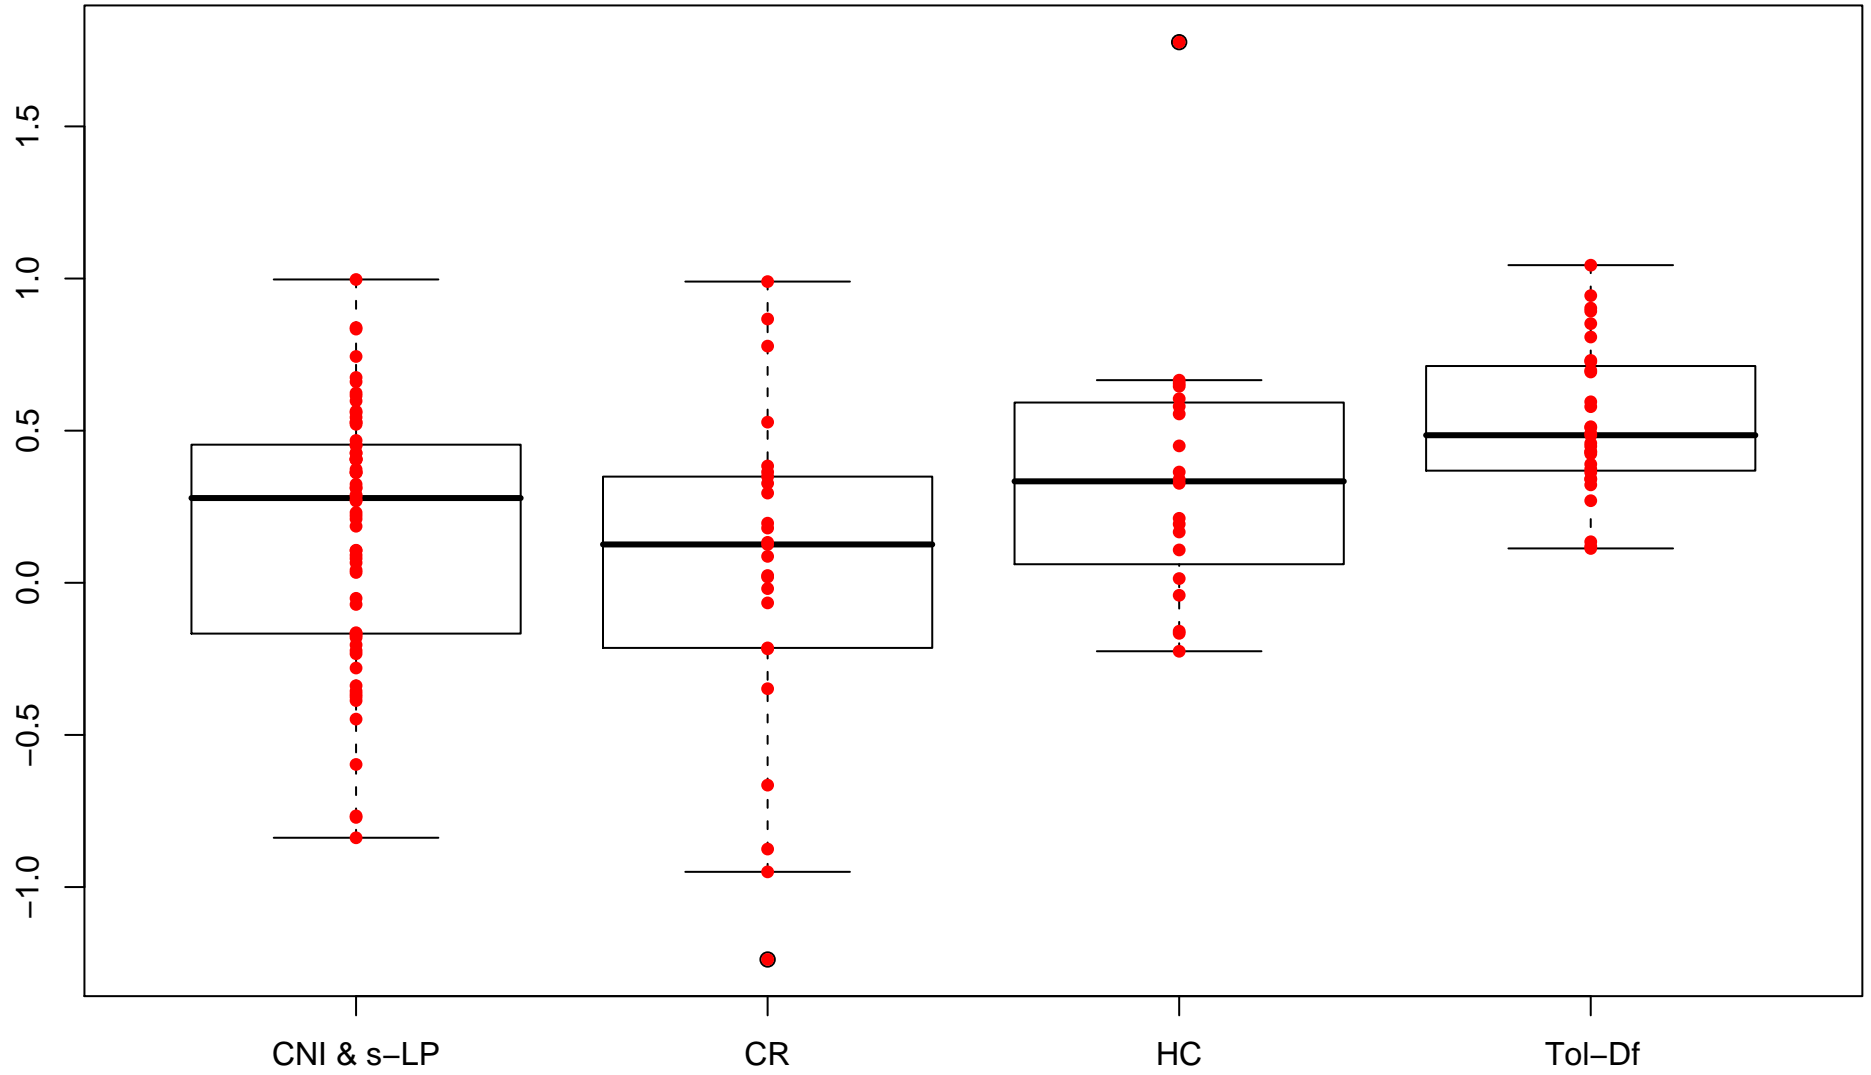

Rank 359 : CHST2  
6.174e-05

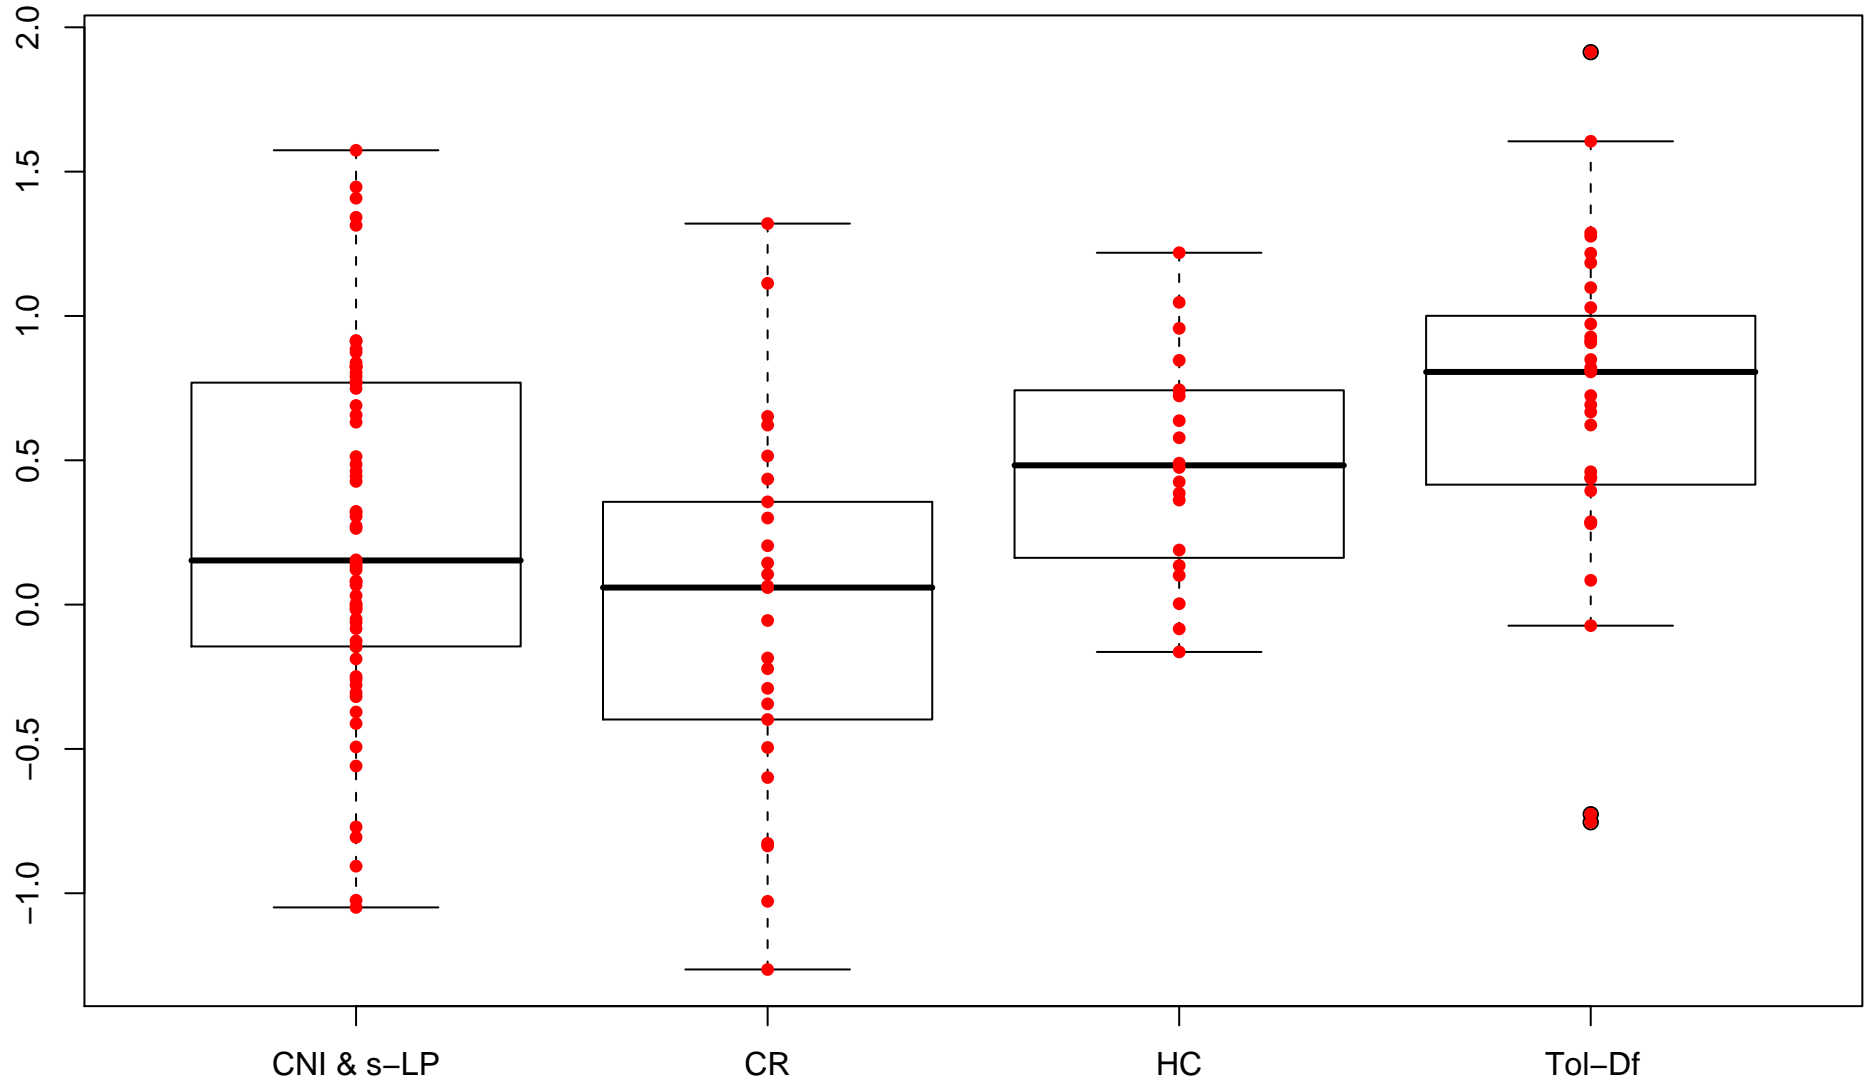



Rank 360 : ARG1  
6.279e-05

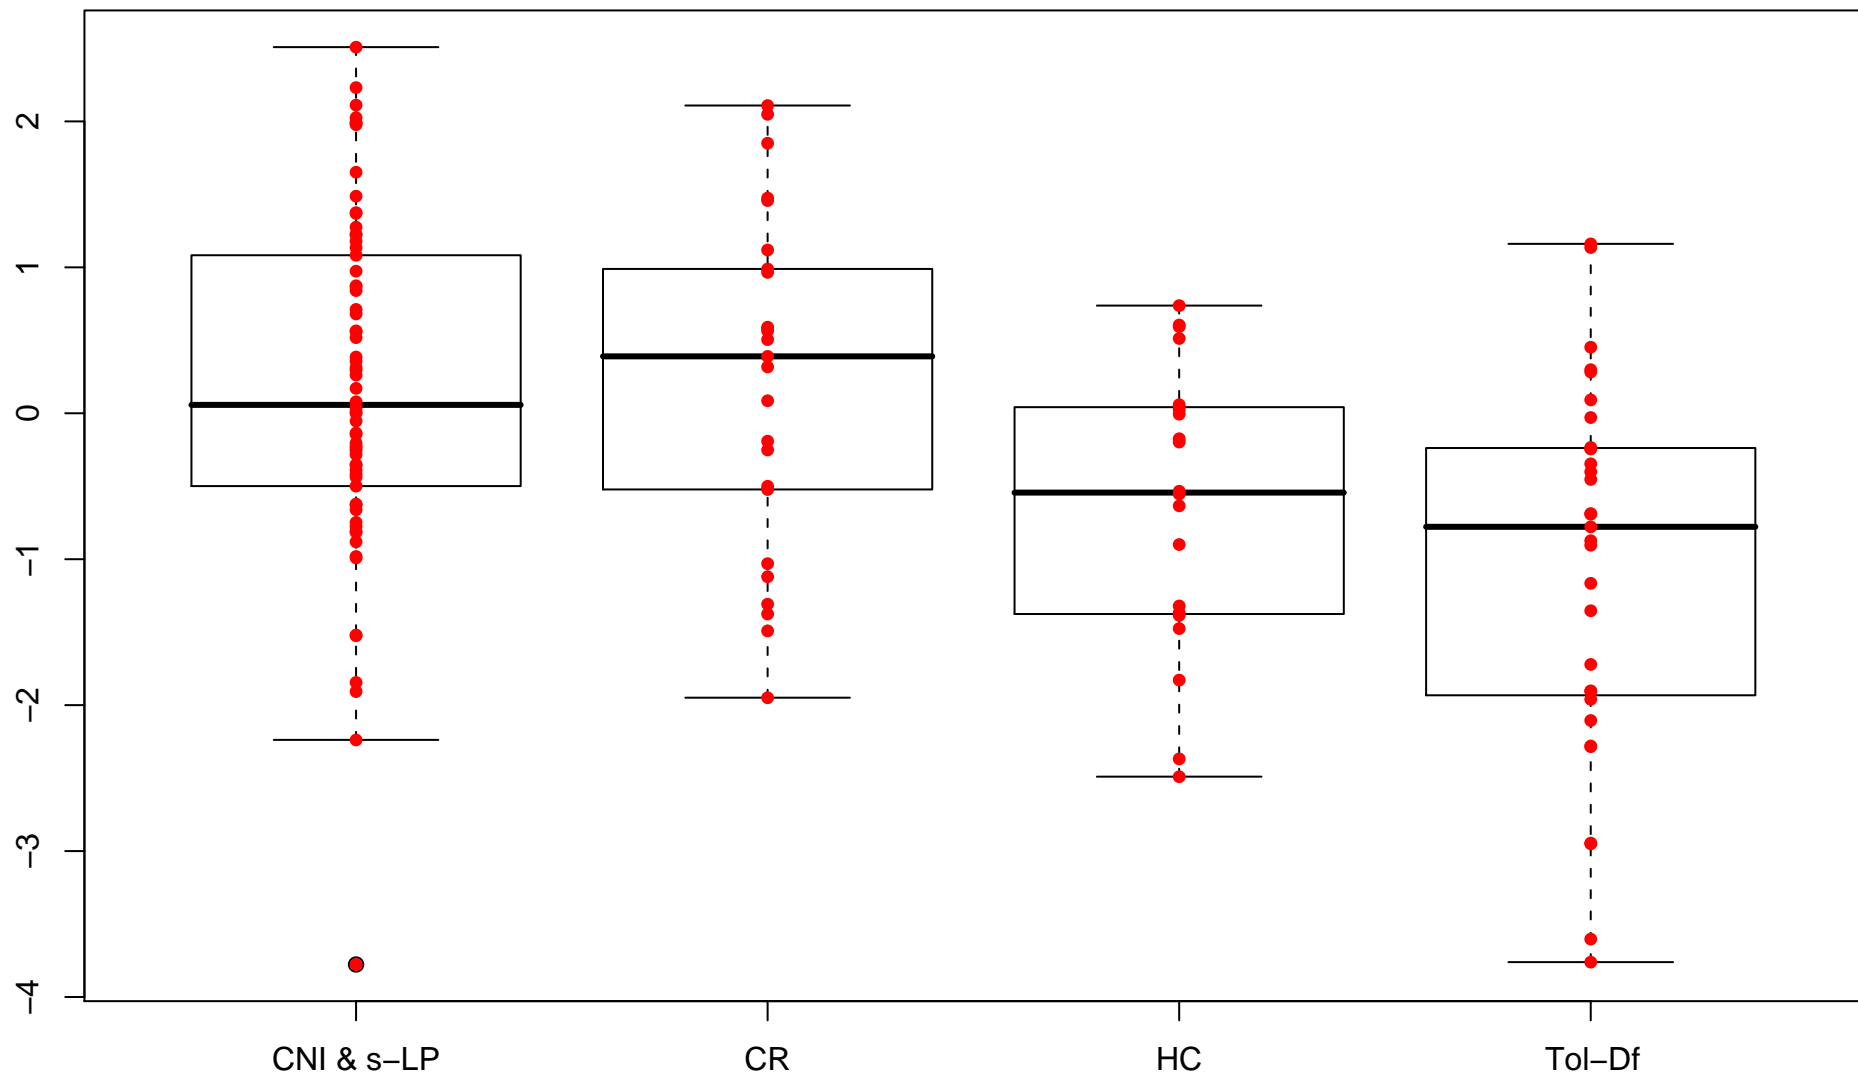

Rank 361 : SSFA2  
6.557e-05

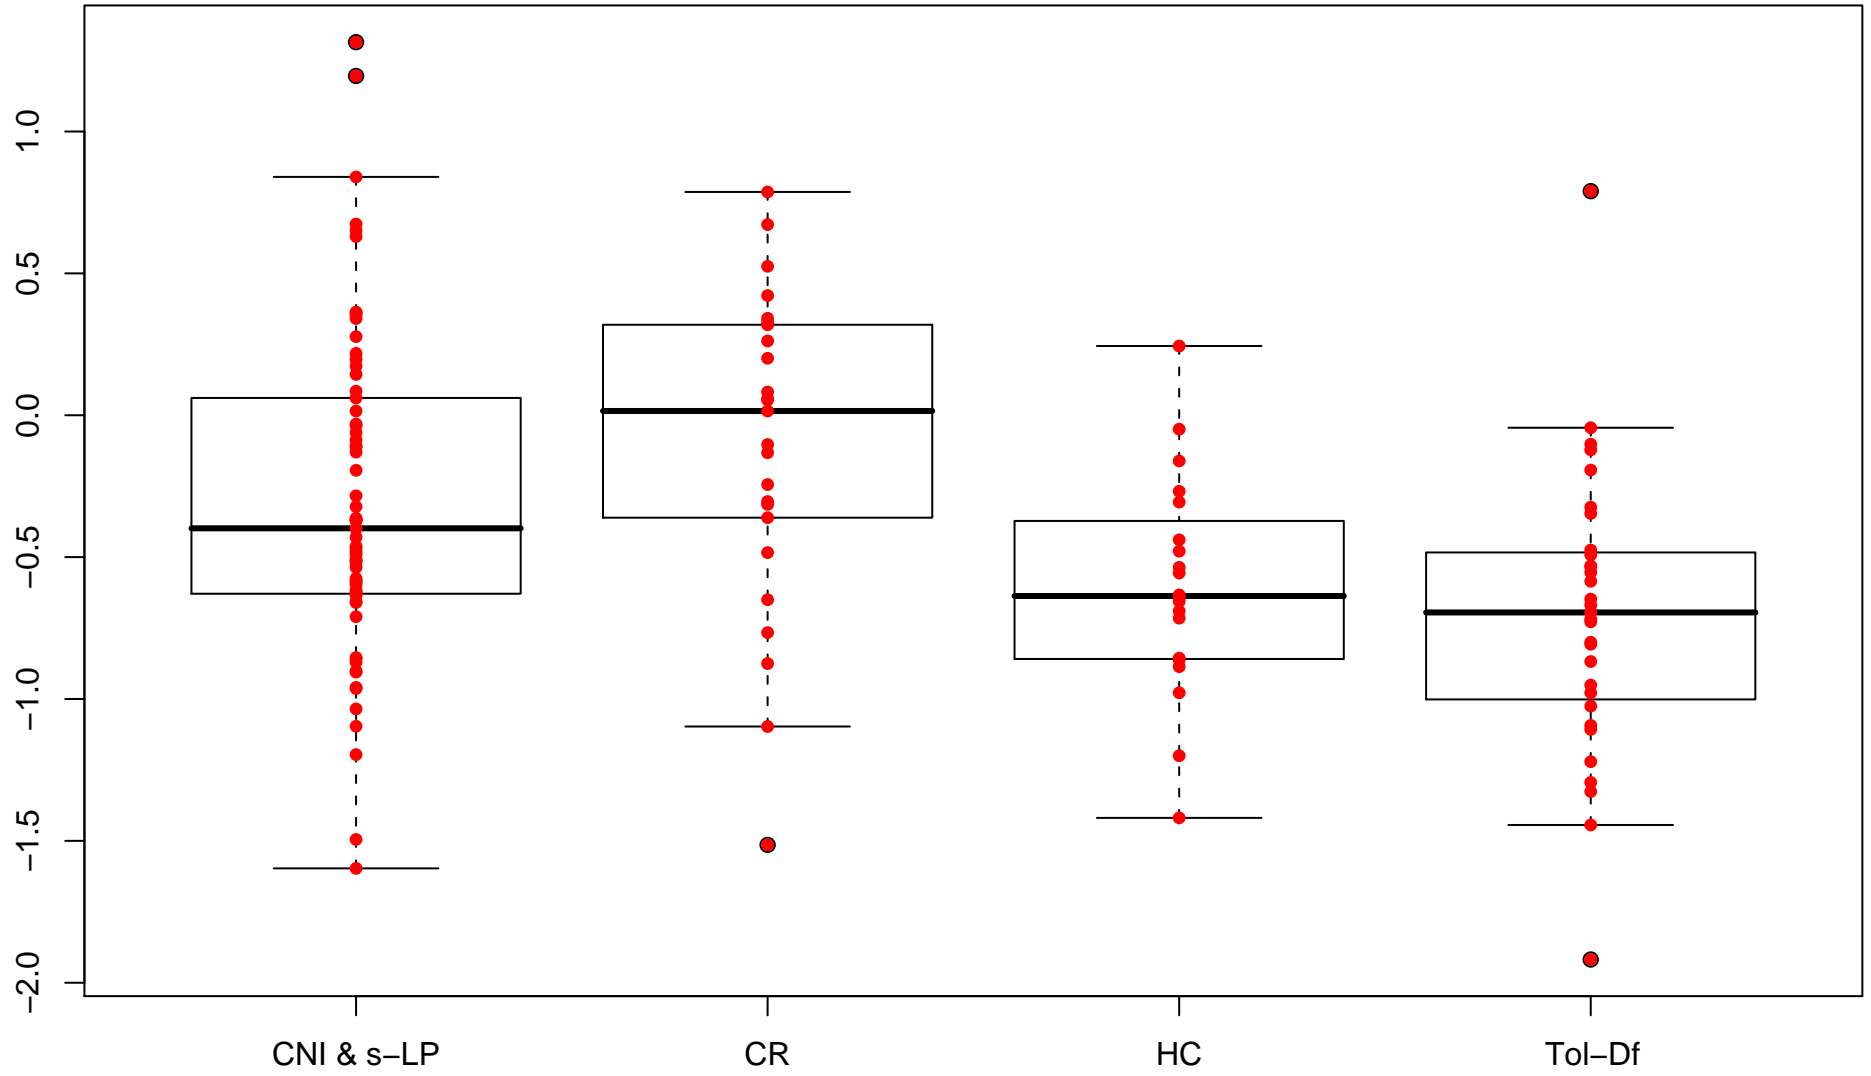

Rank 362 : DHX9  
6.631e-05

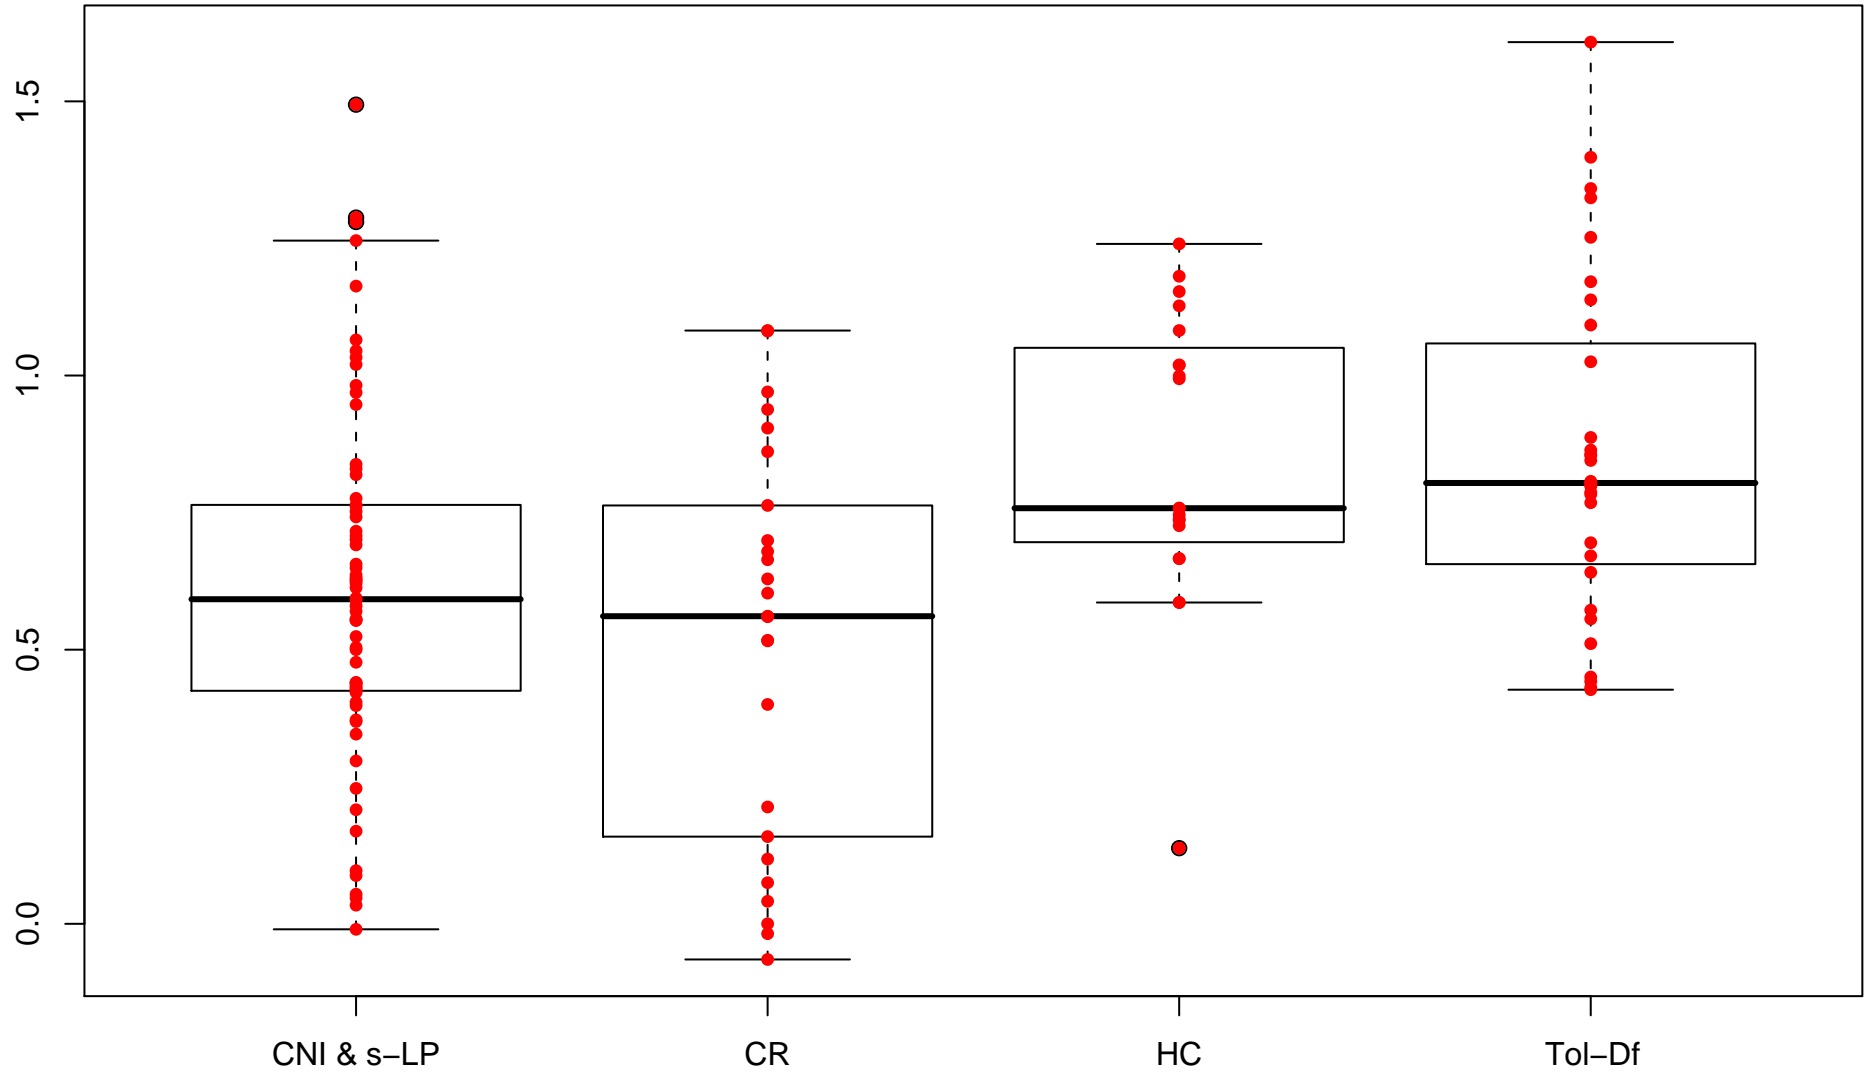

Rank 363 : UBE2CBP  
6.673e-05

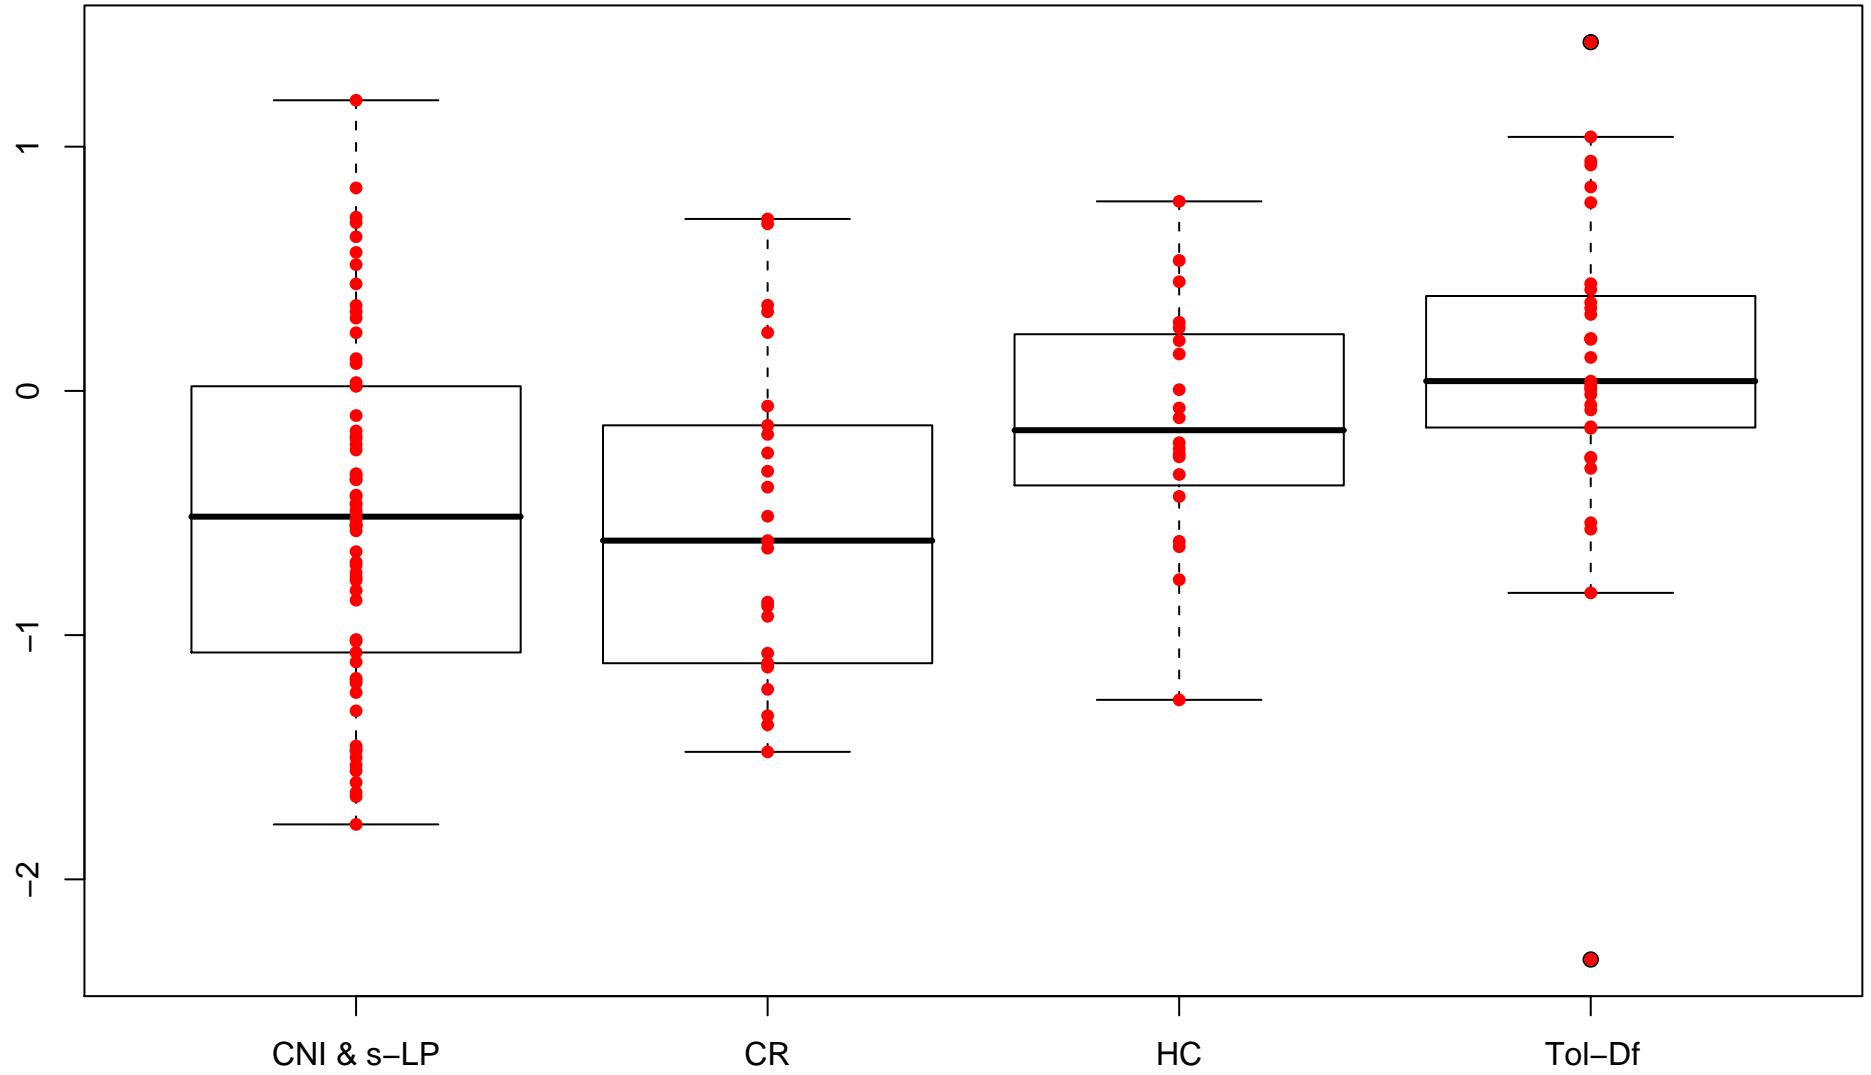

Rank 364 : DEFA4  
6.744e-05

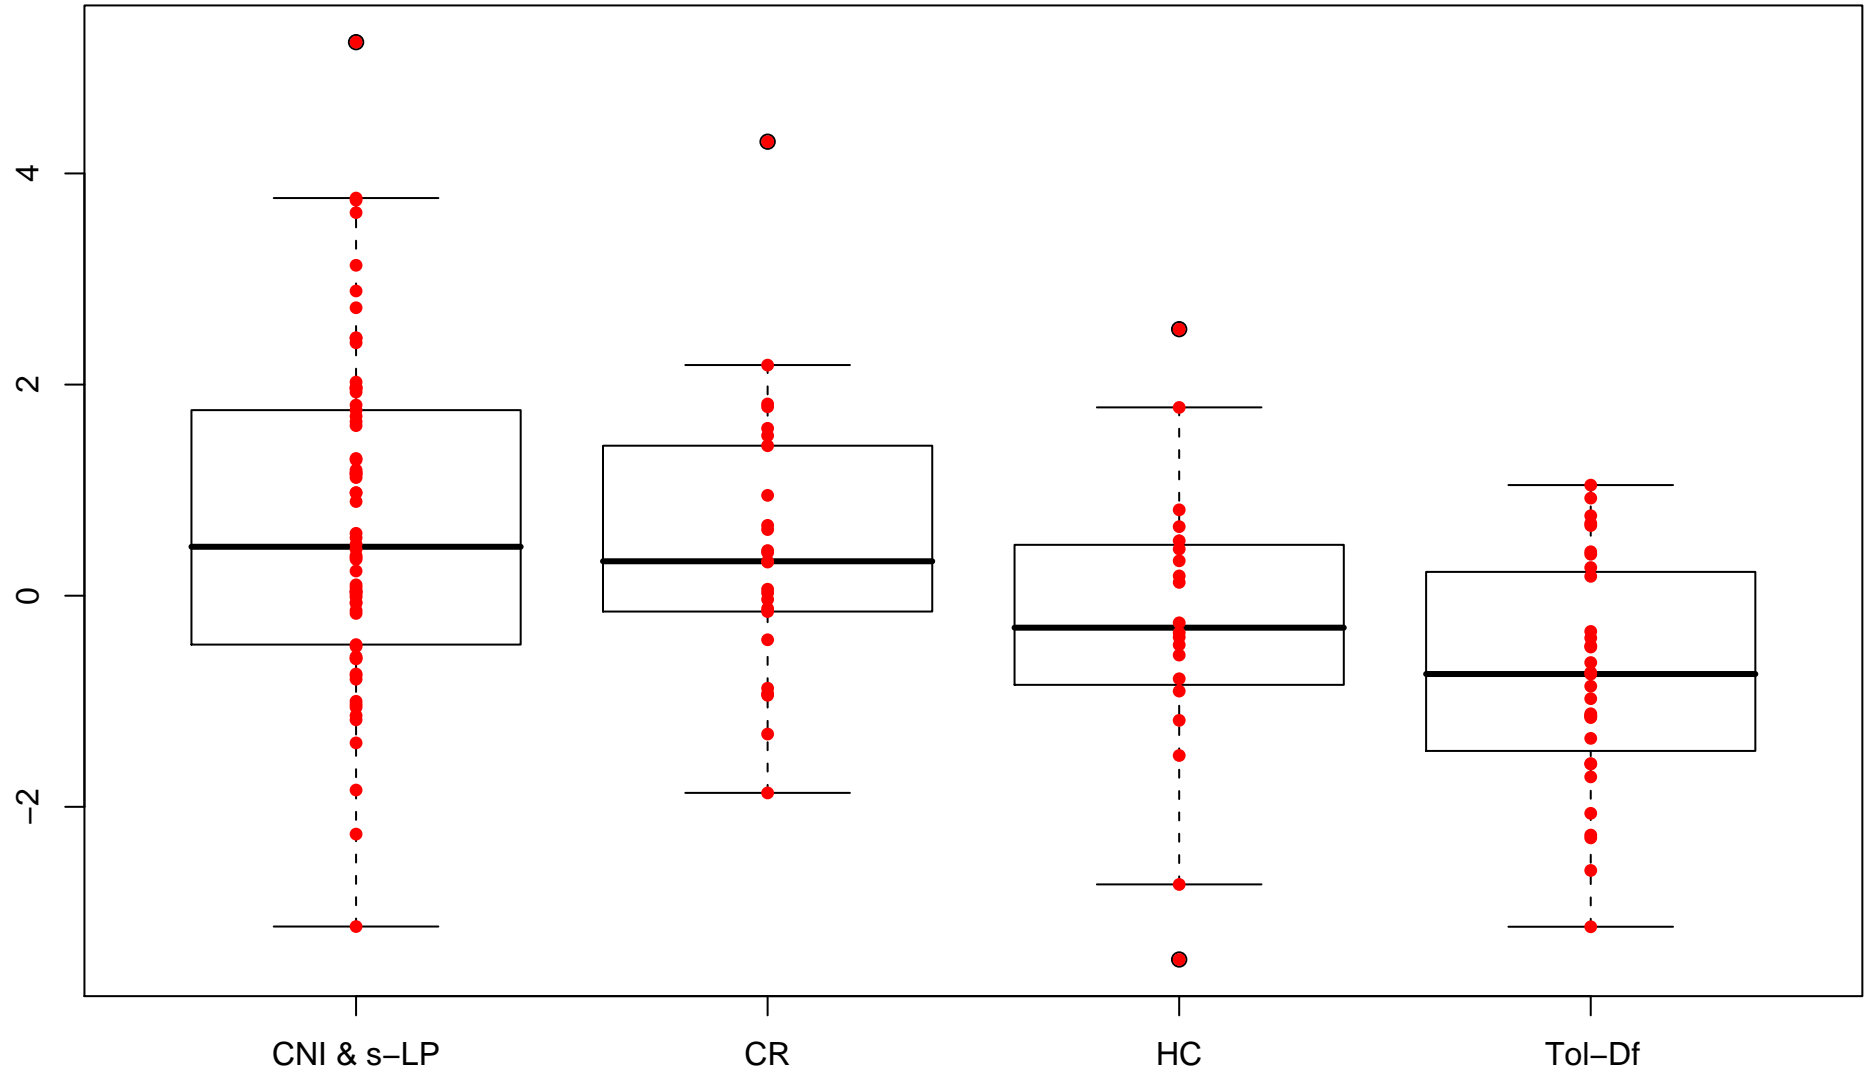

Rank 365 : HLA-DRA  
6.956e-05

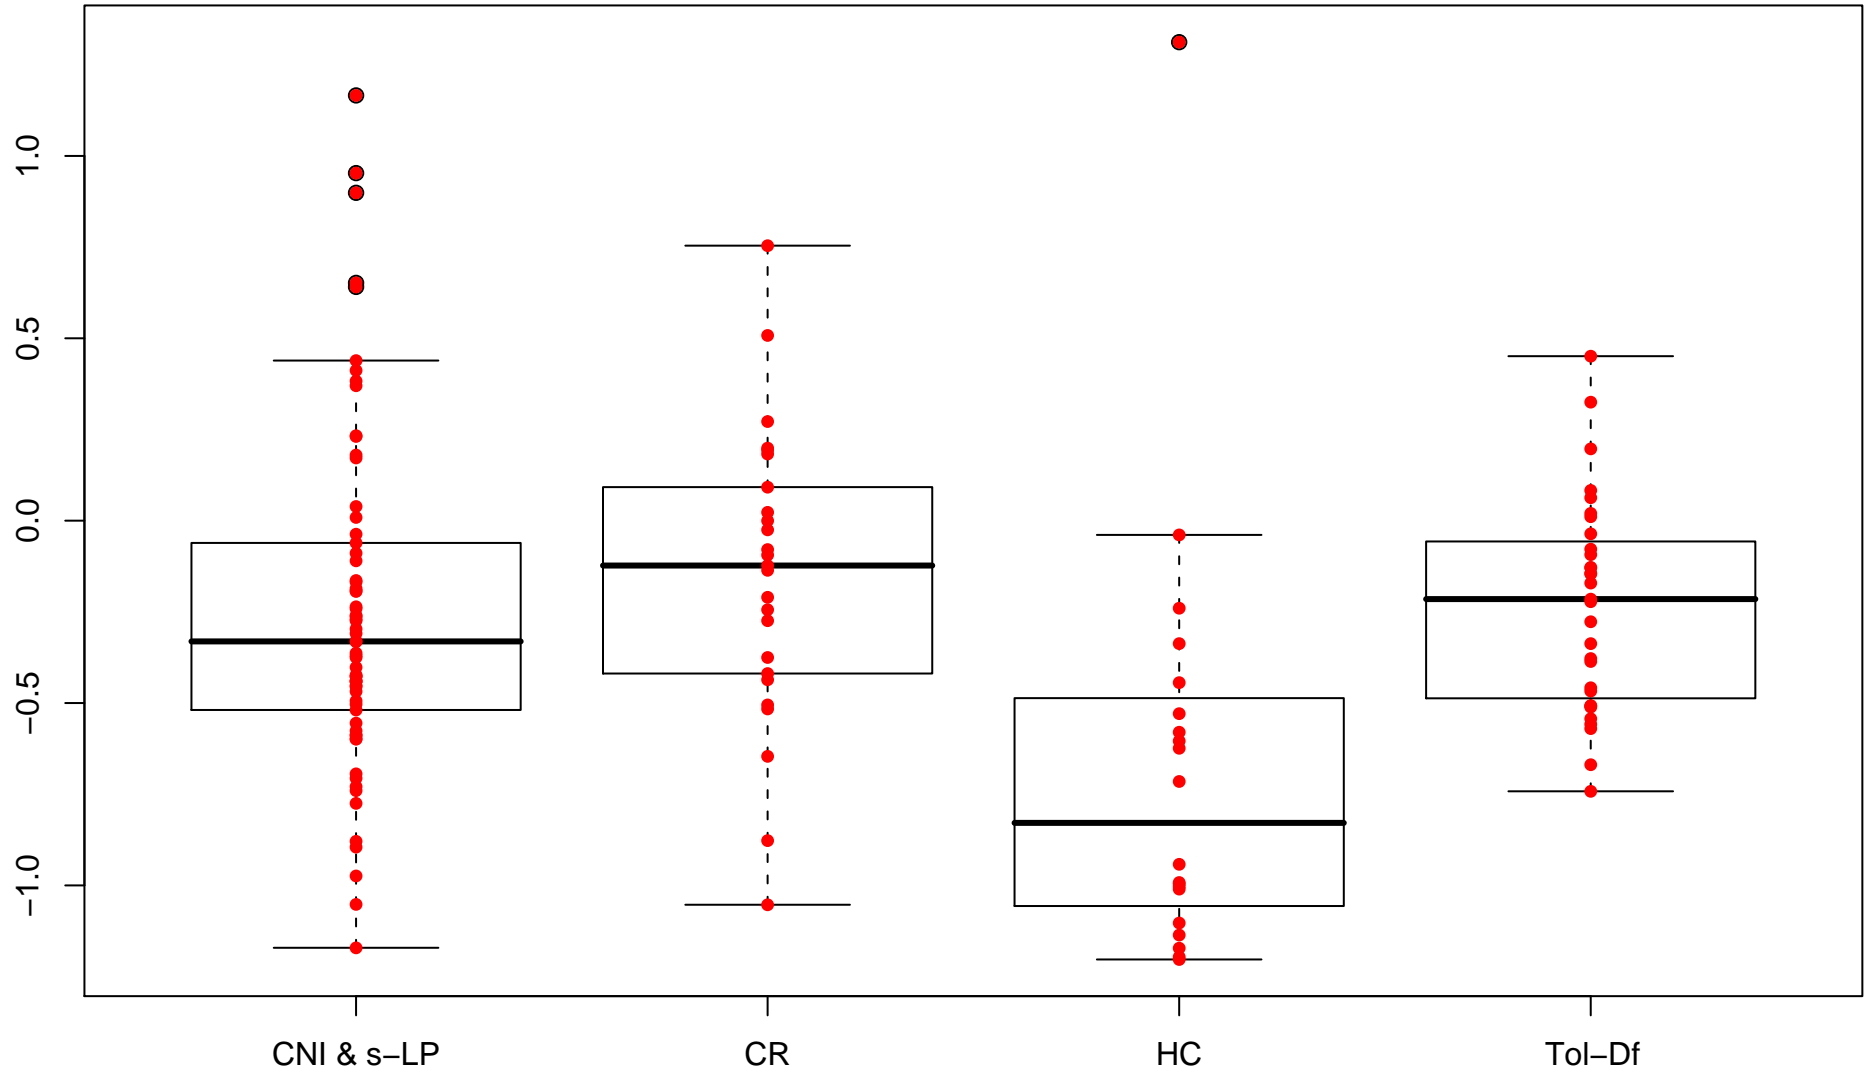

Rank 366 : DNTT  
6.981e-05

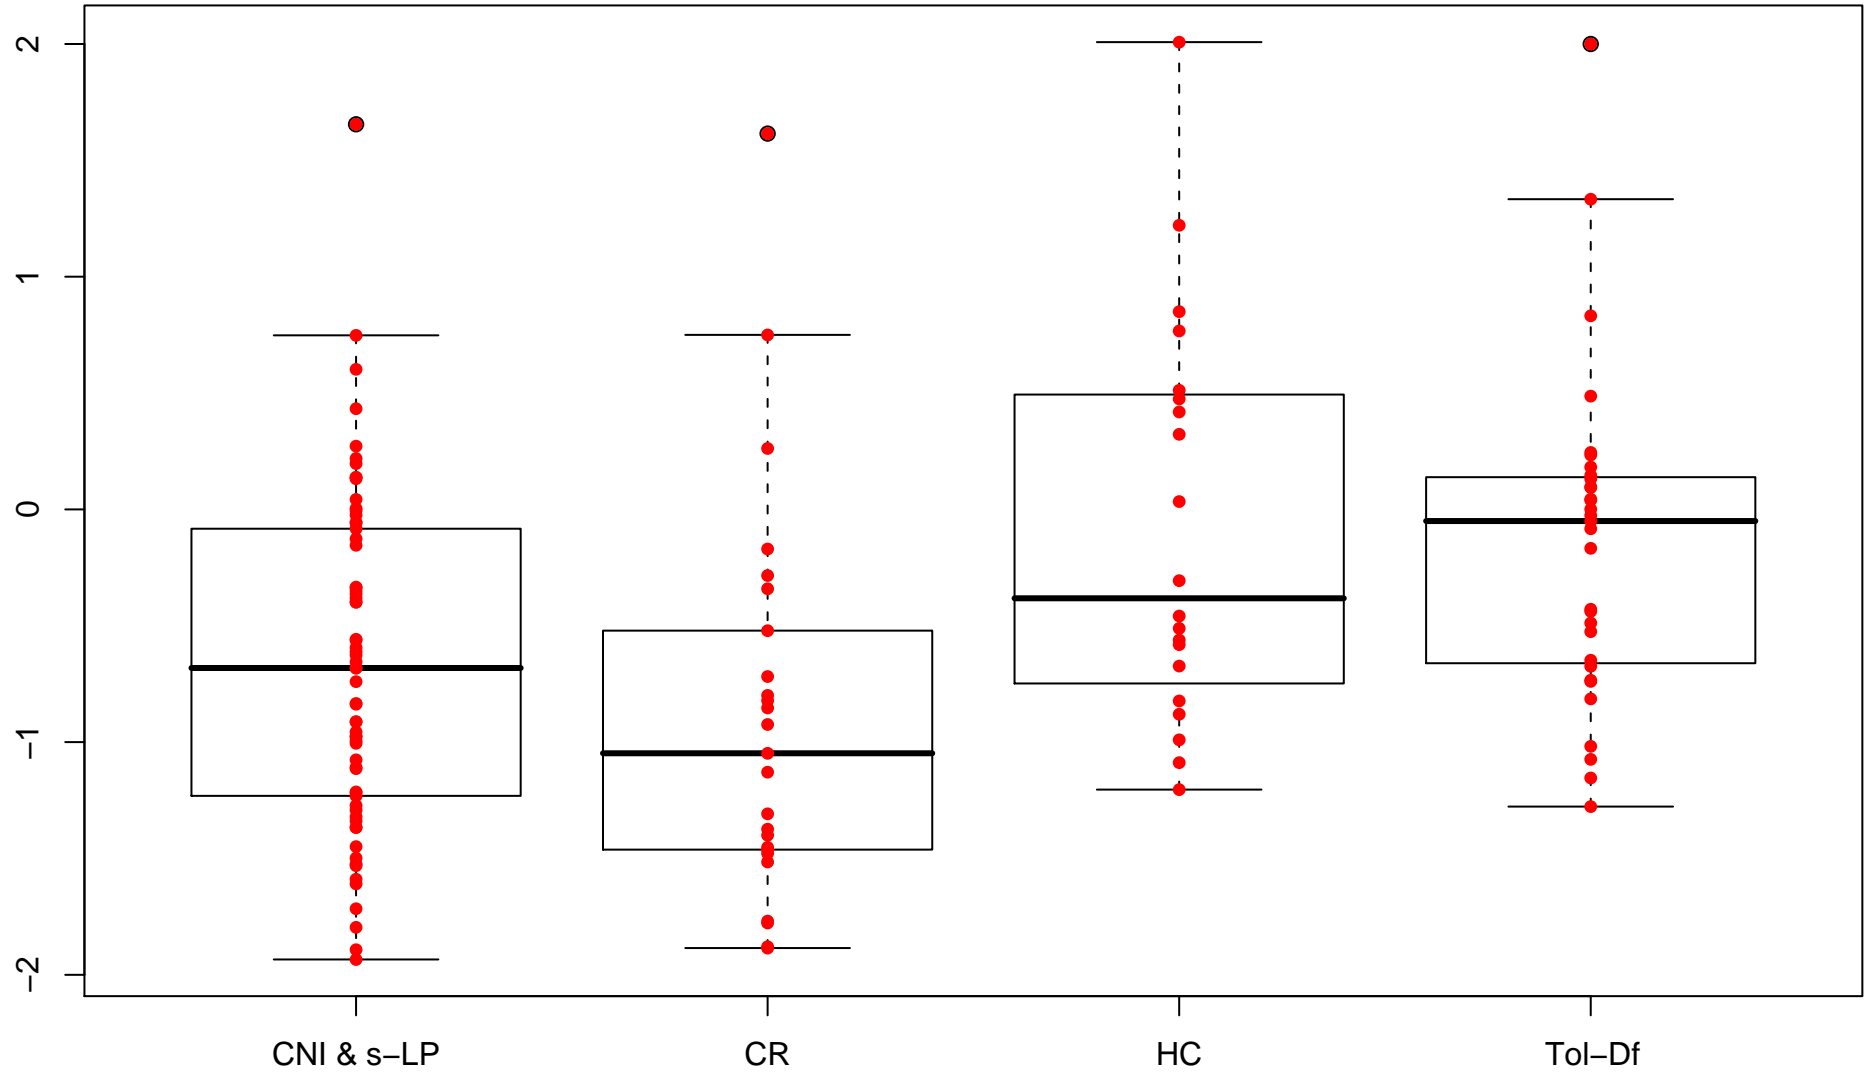

Rank 367 : ZDHHC3  
7.113e-05

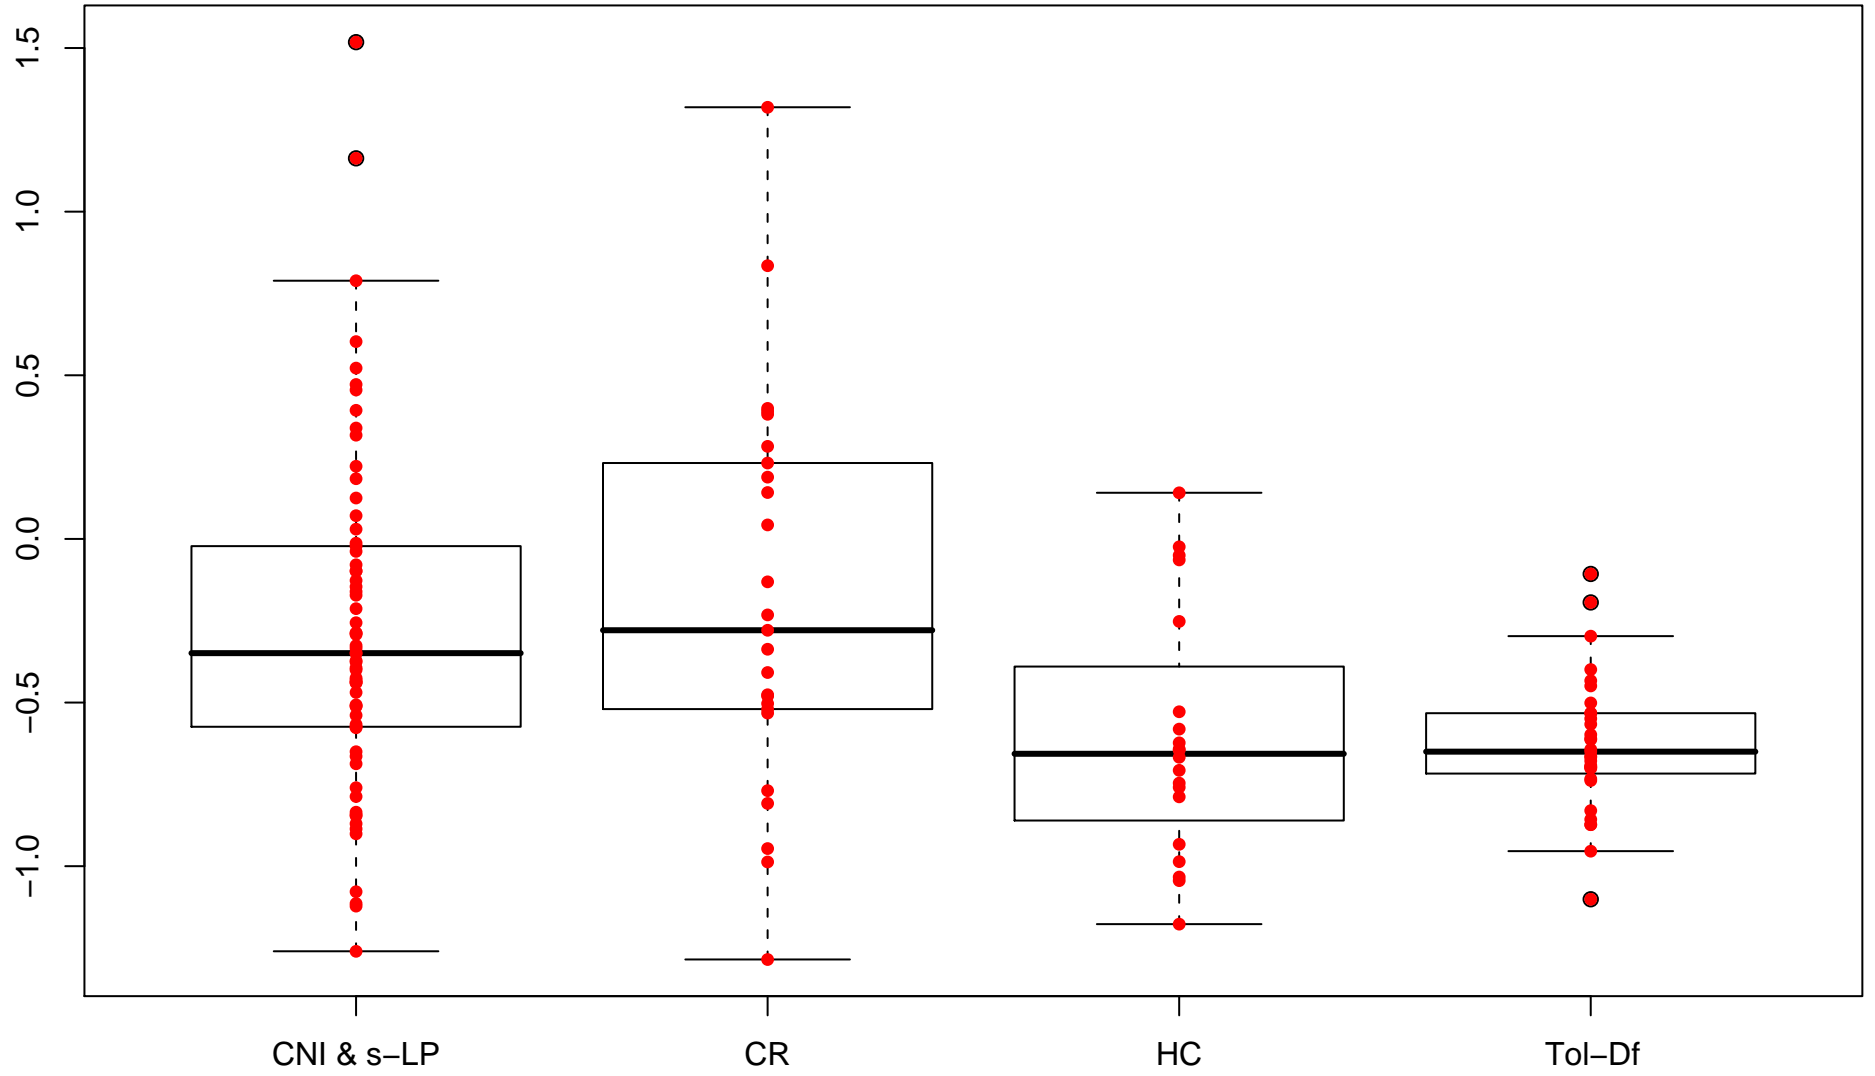



Rank 368 : RHBDD1  
7.127e-05

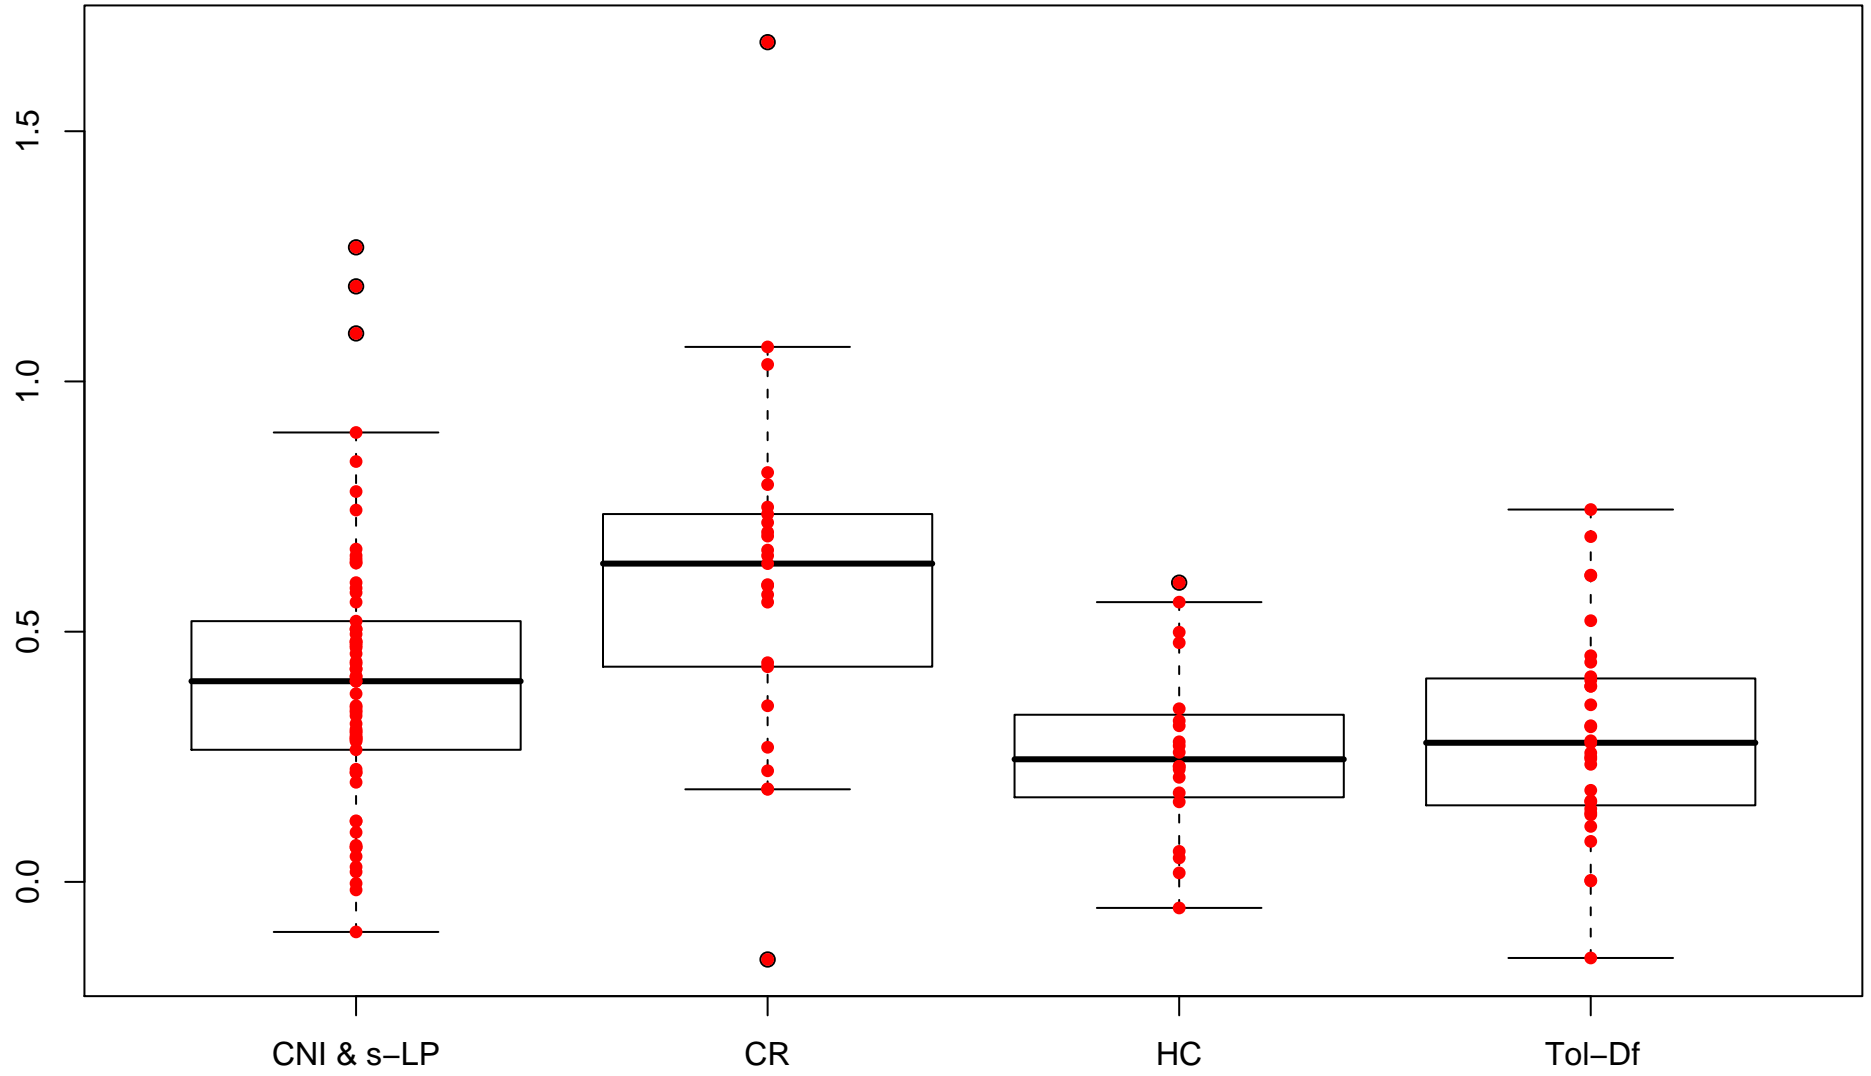

Rank 369 : IL7R  
7.142e-05

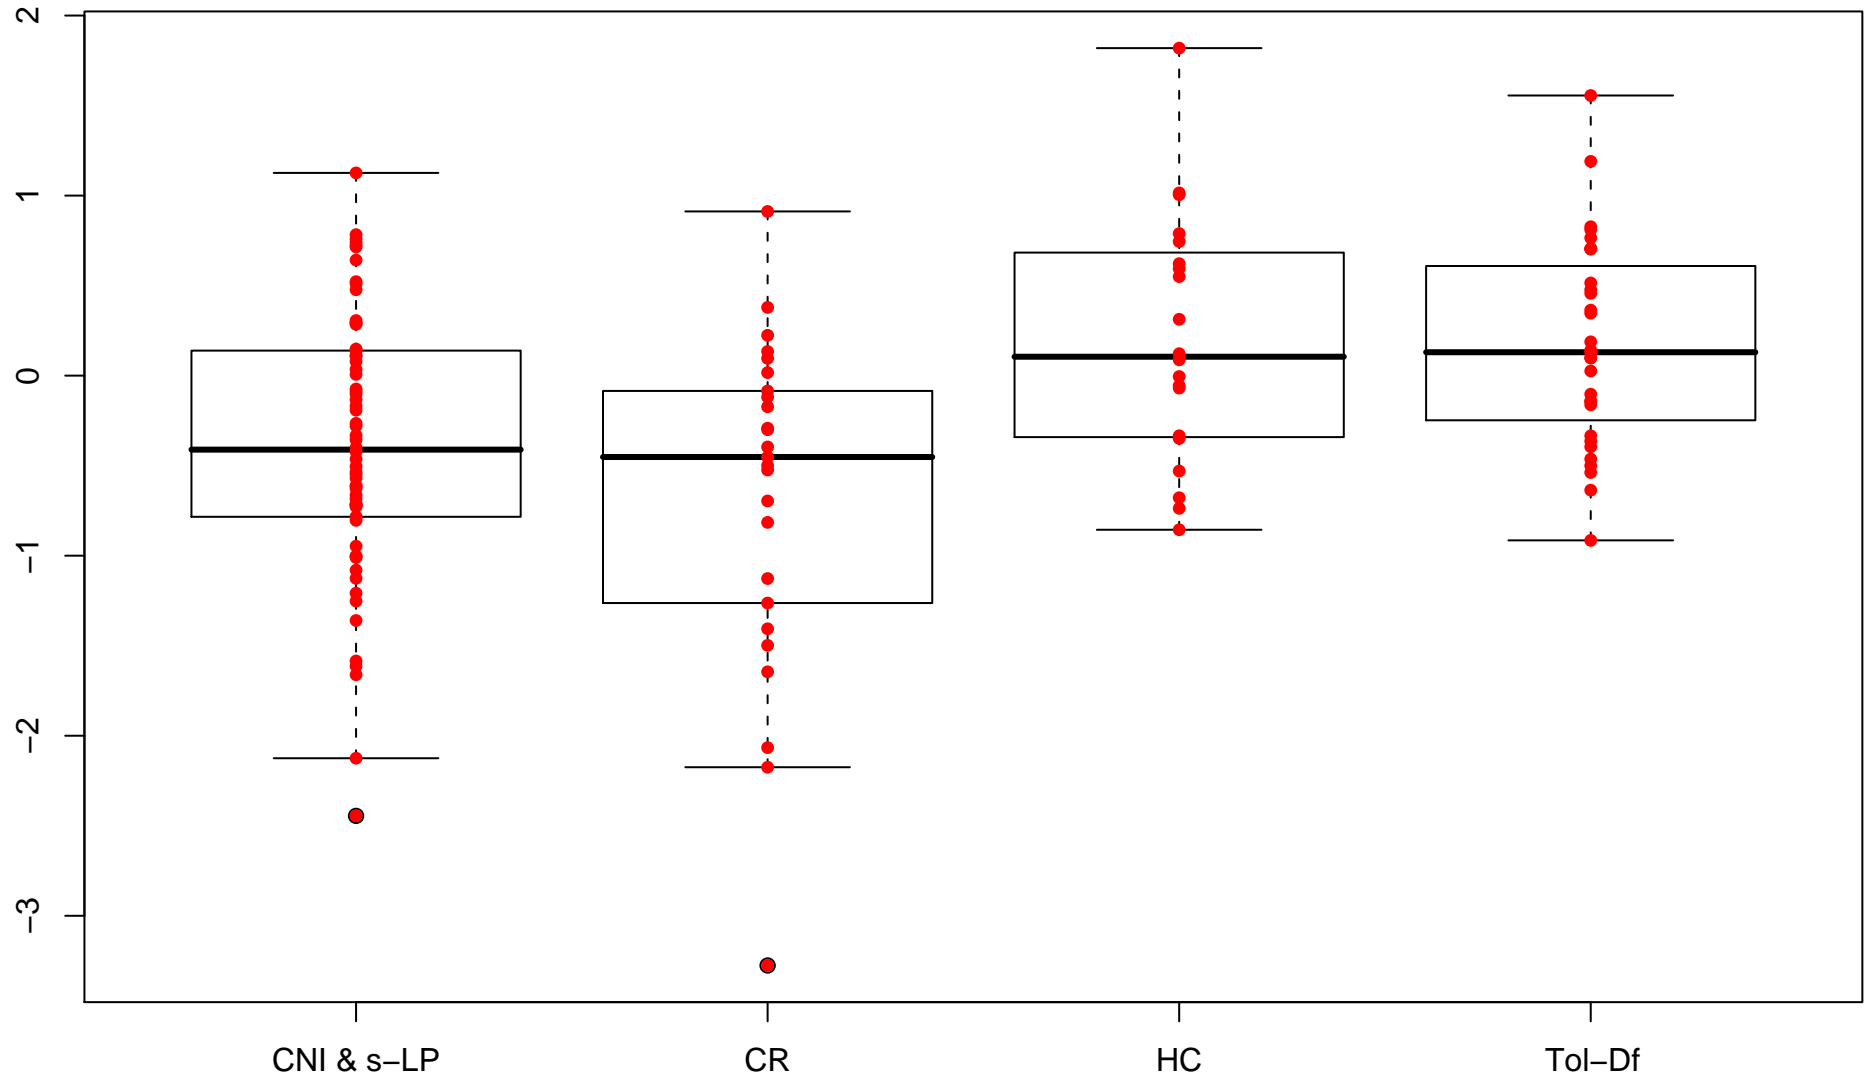

Rank 370 : SFT2D3  
7.265e-05

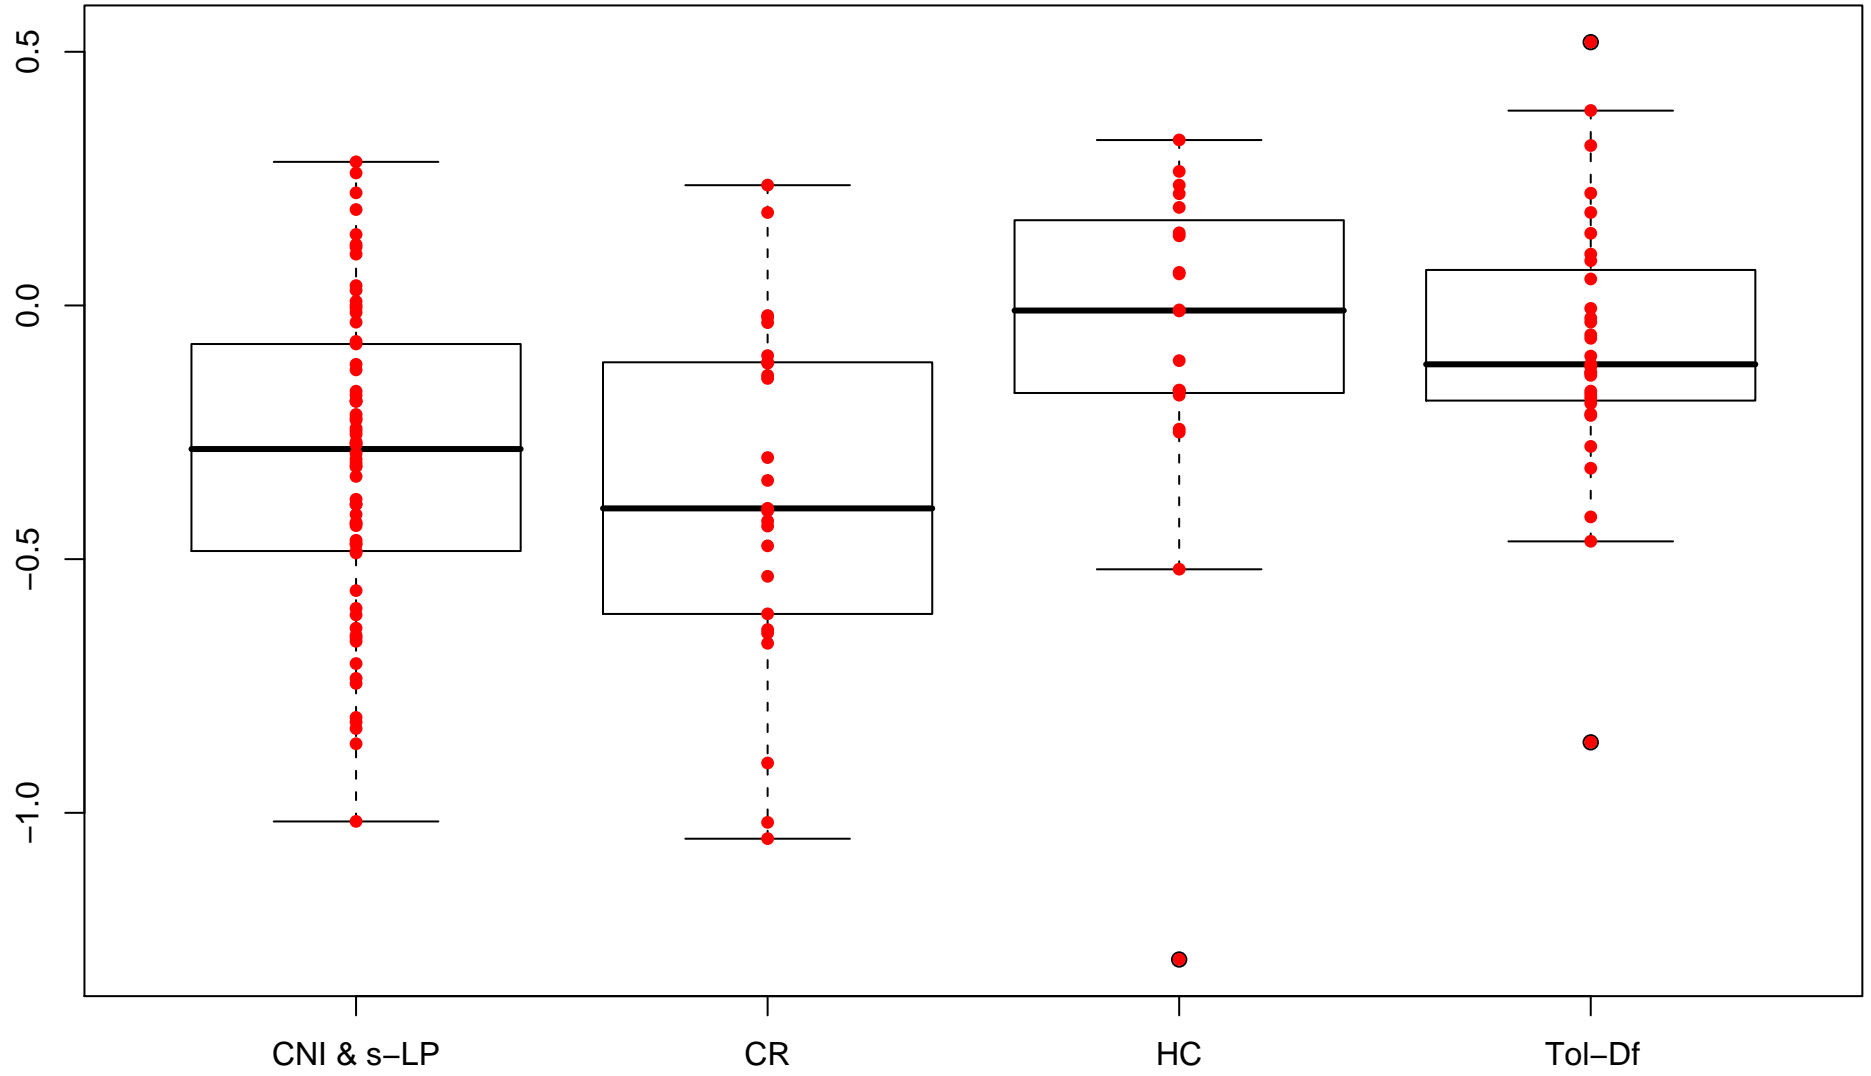

Rank 371 : KLRG1  
7.338e-05

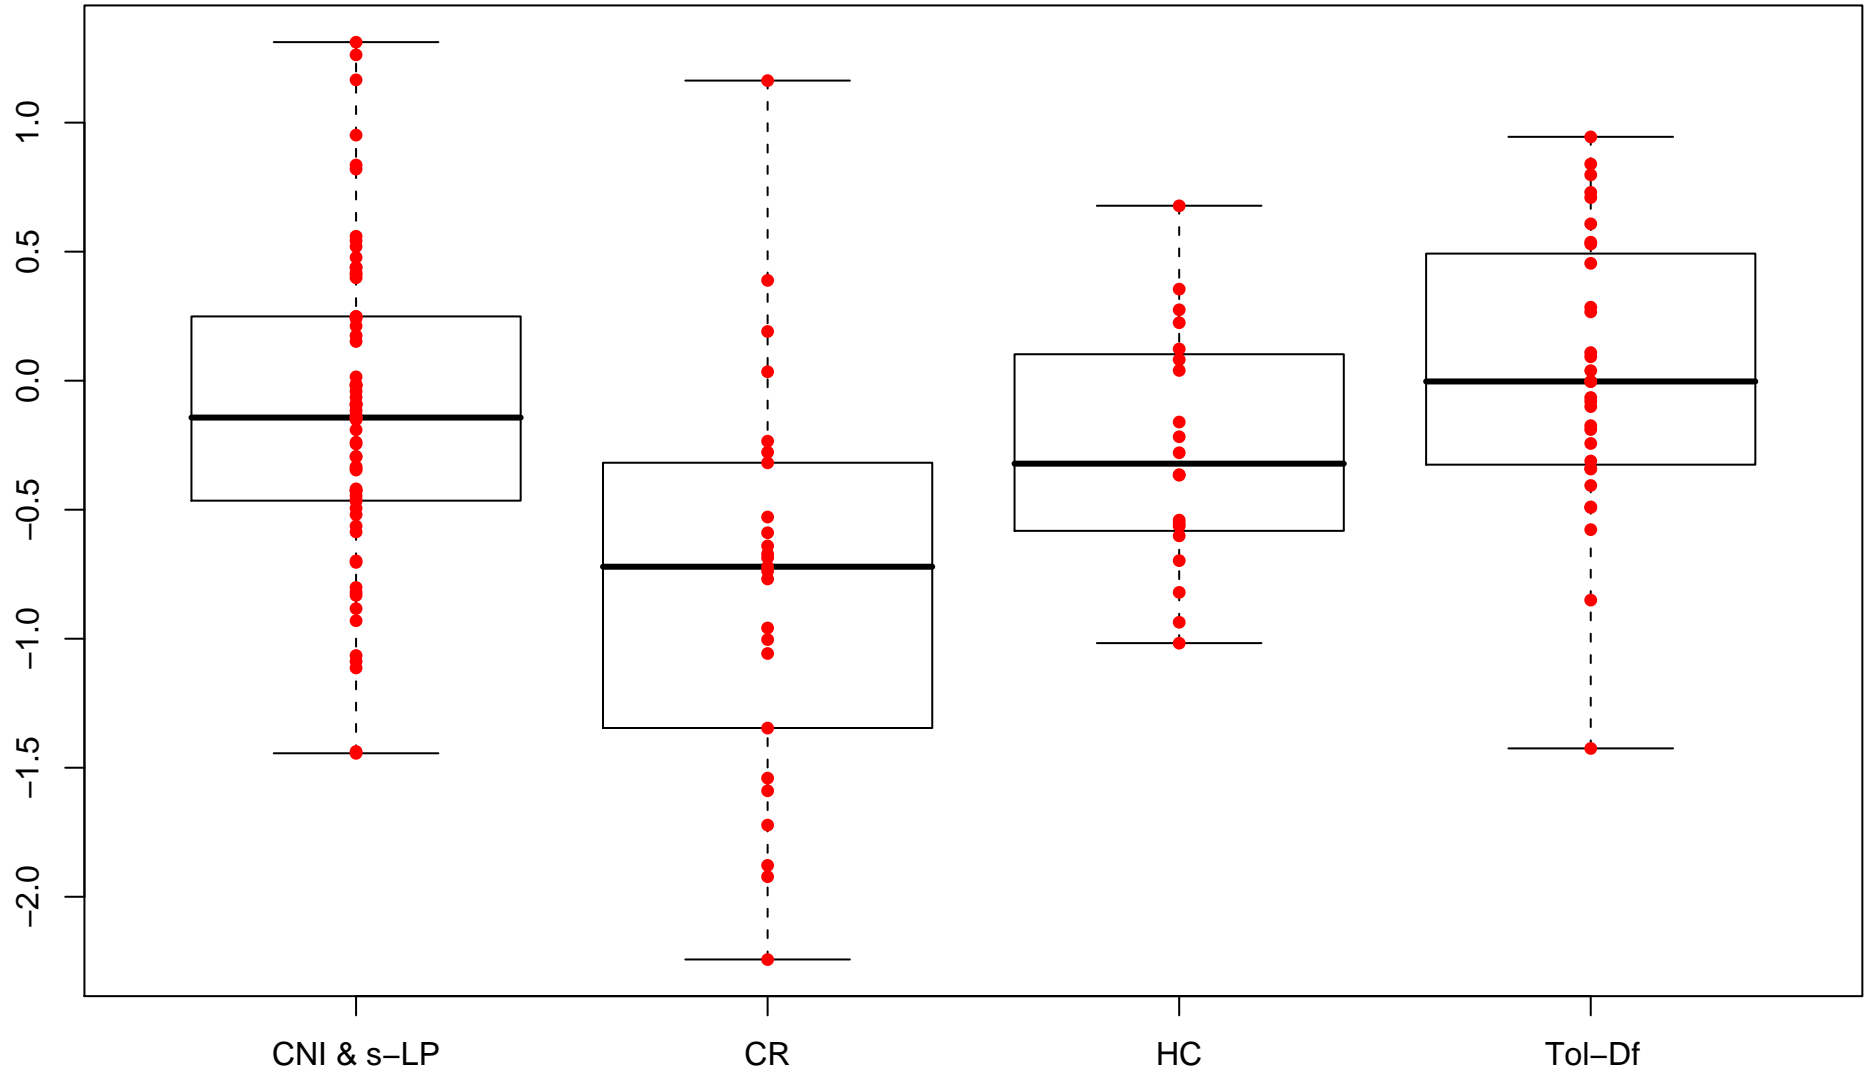

Rank 372 : MSR1  
7.422e-05

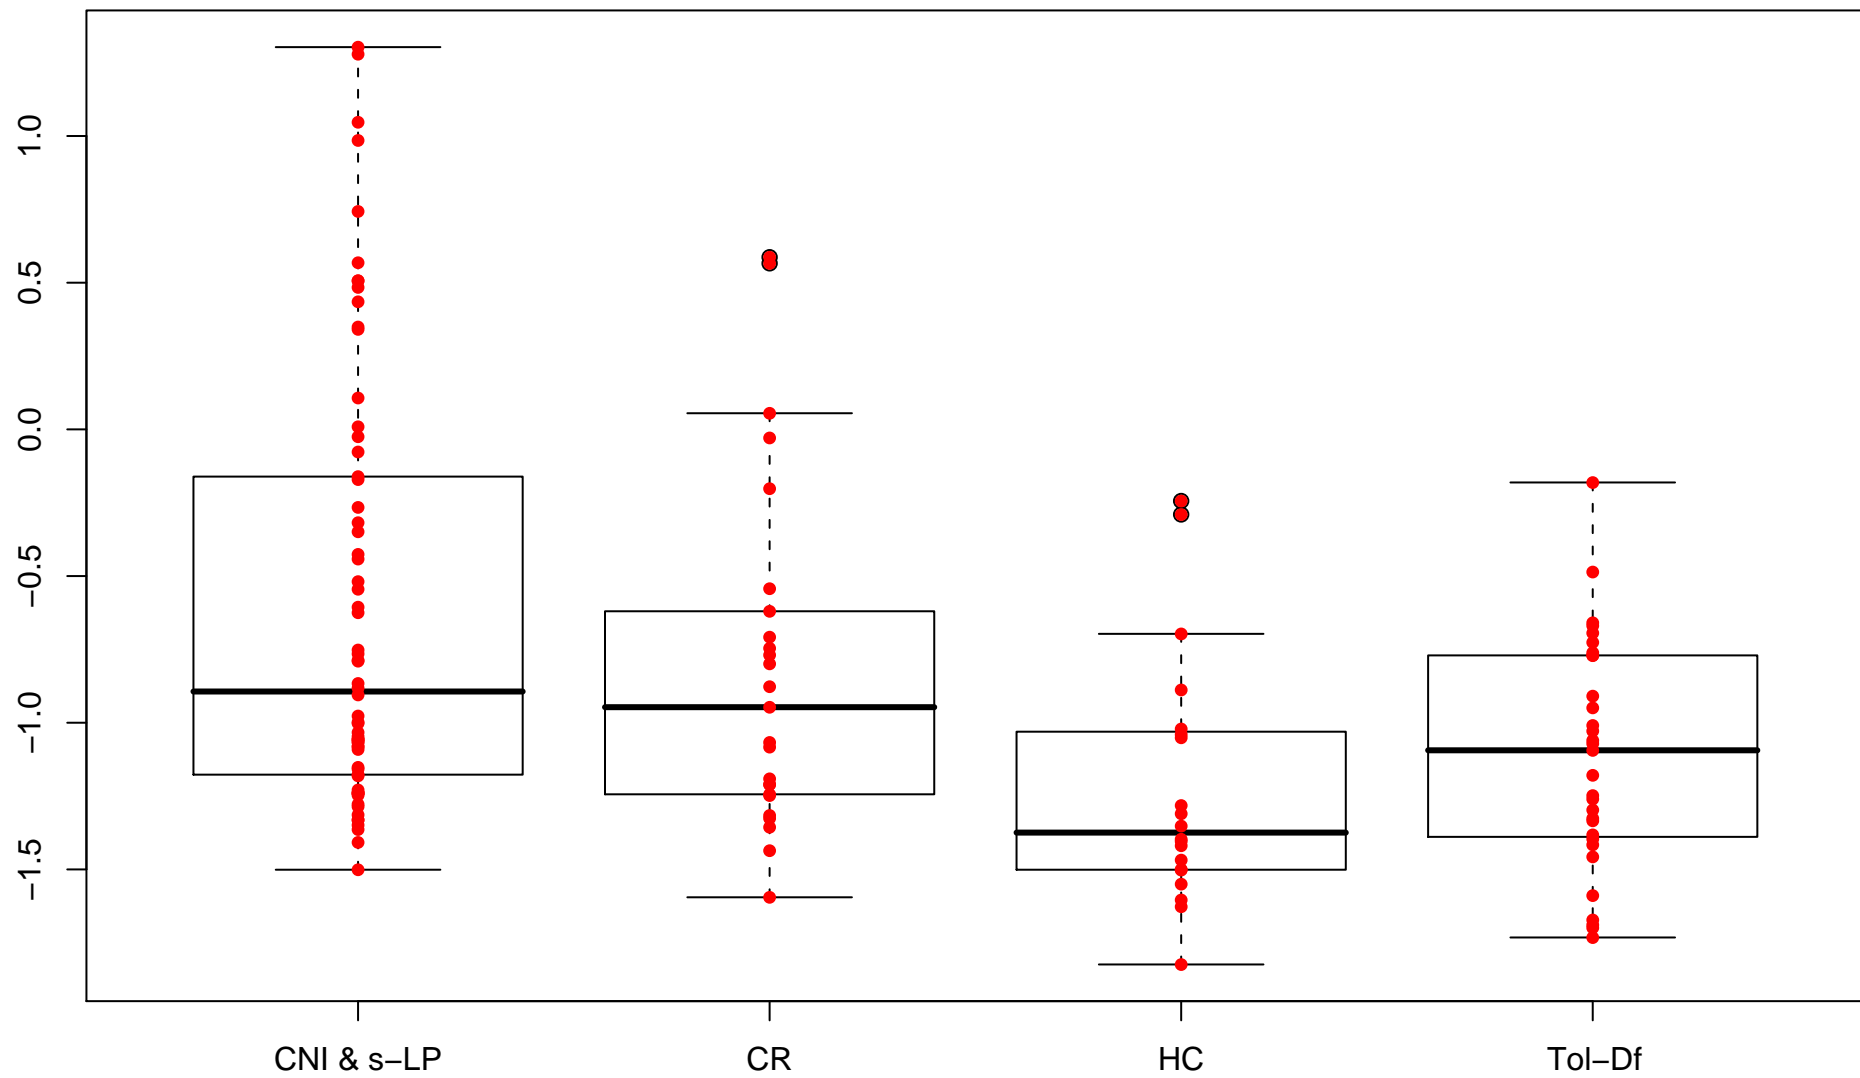

Rank 373 : ABI2  
7.428e-05

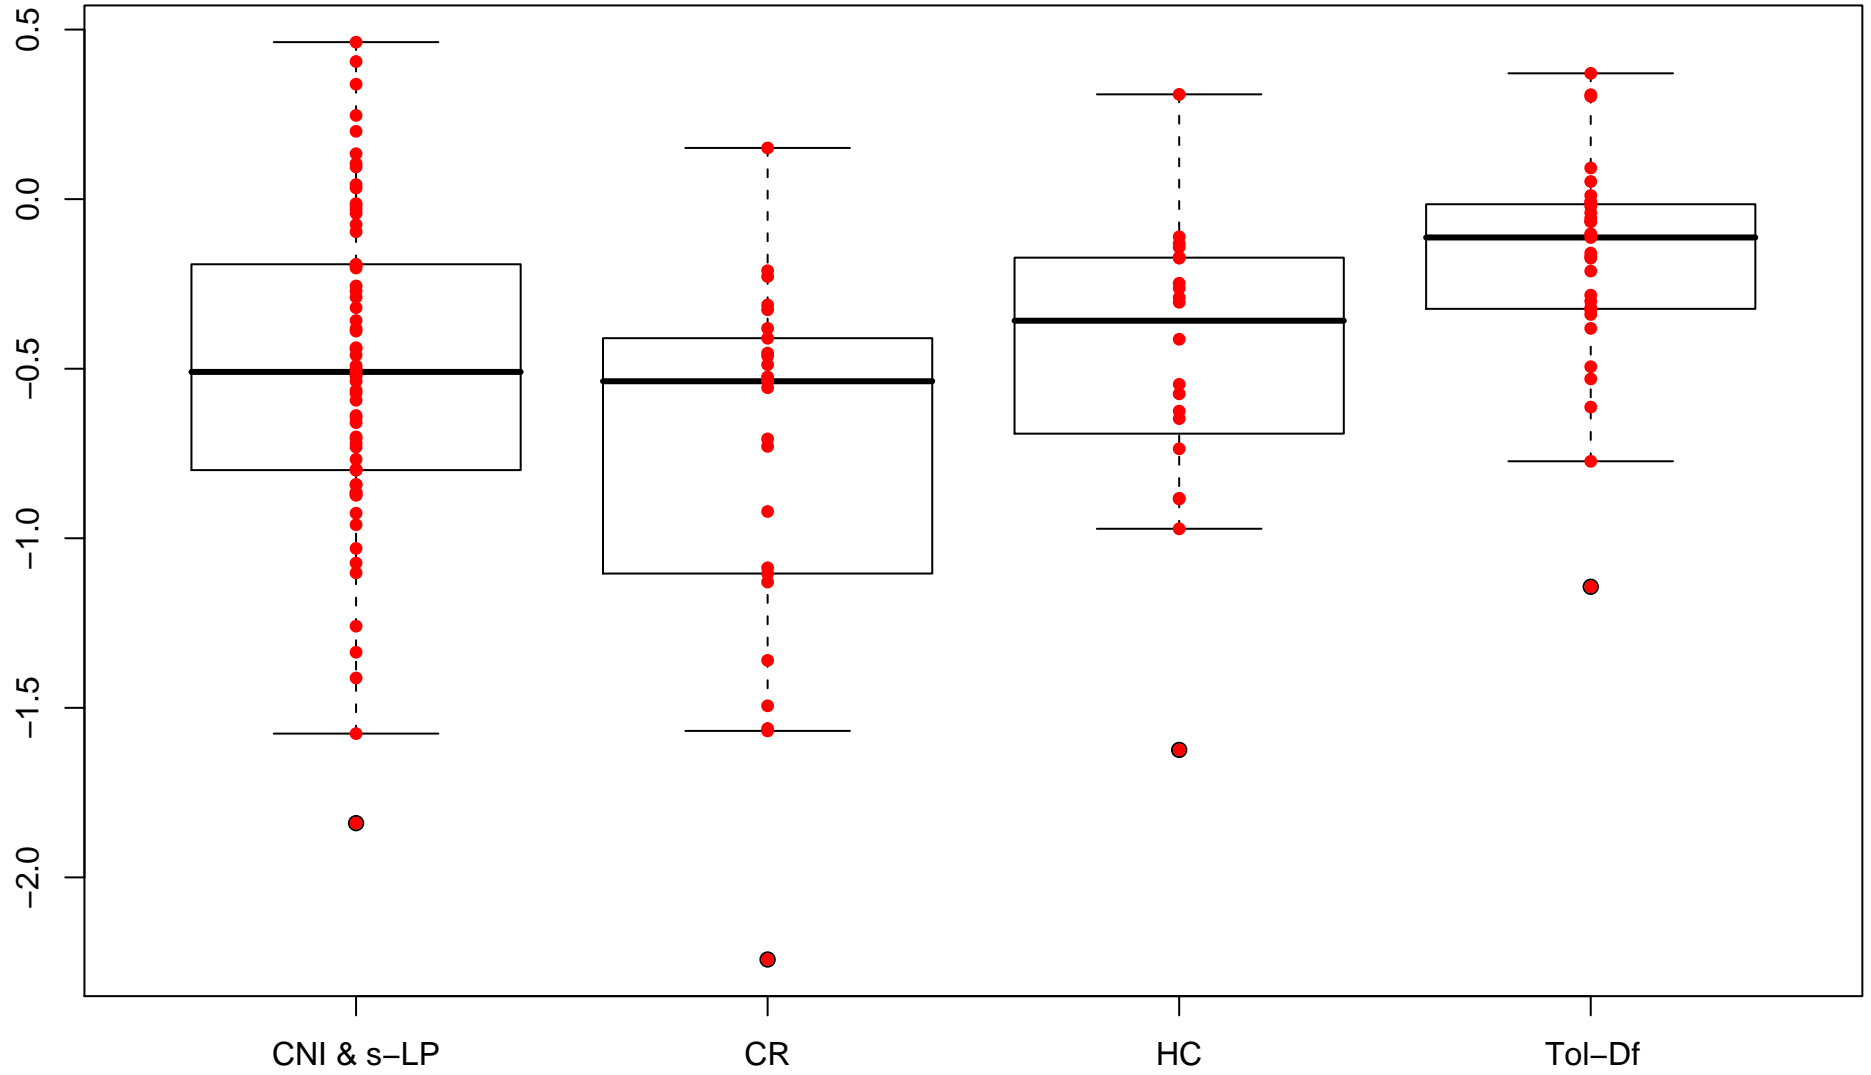

Rank 374 : NDFIP2  
7.467e-05

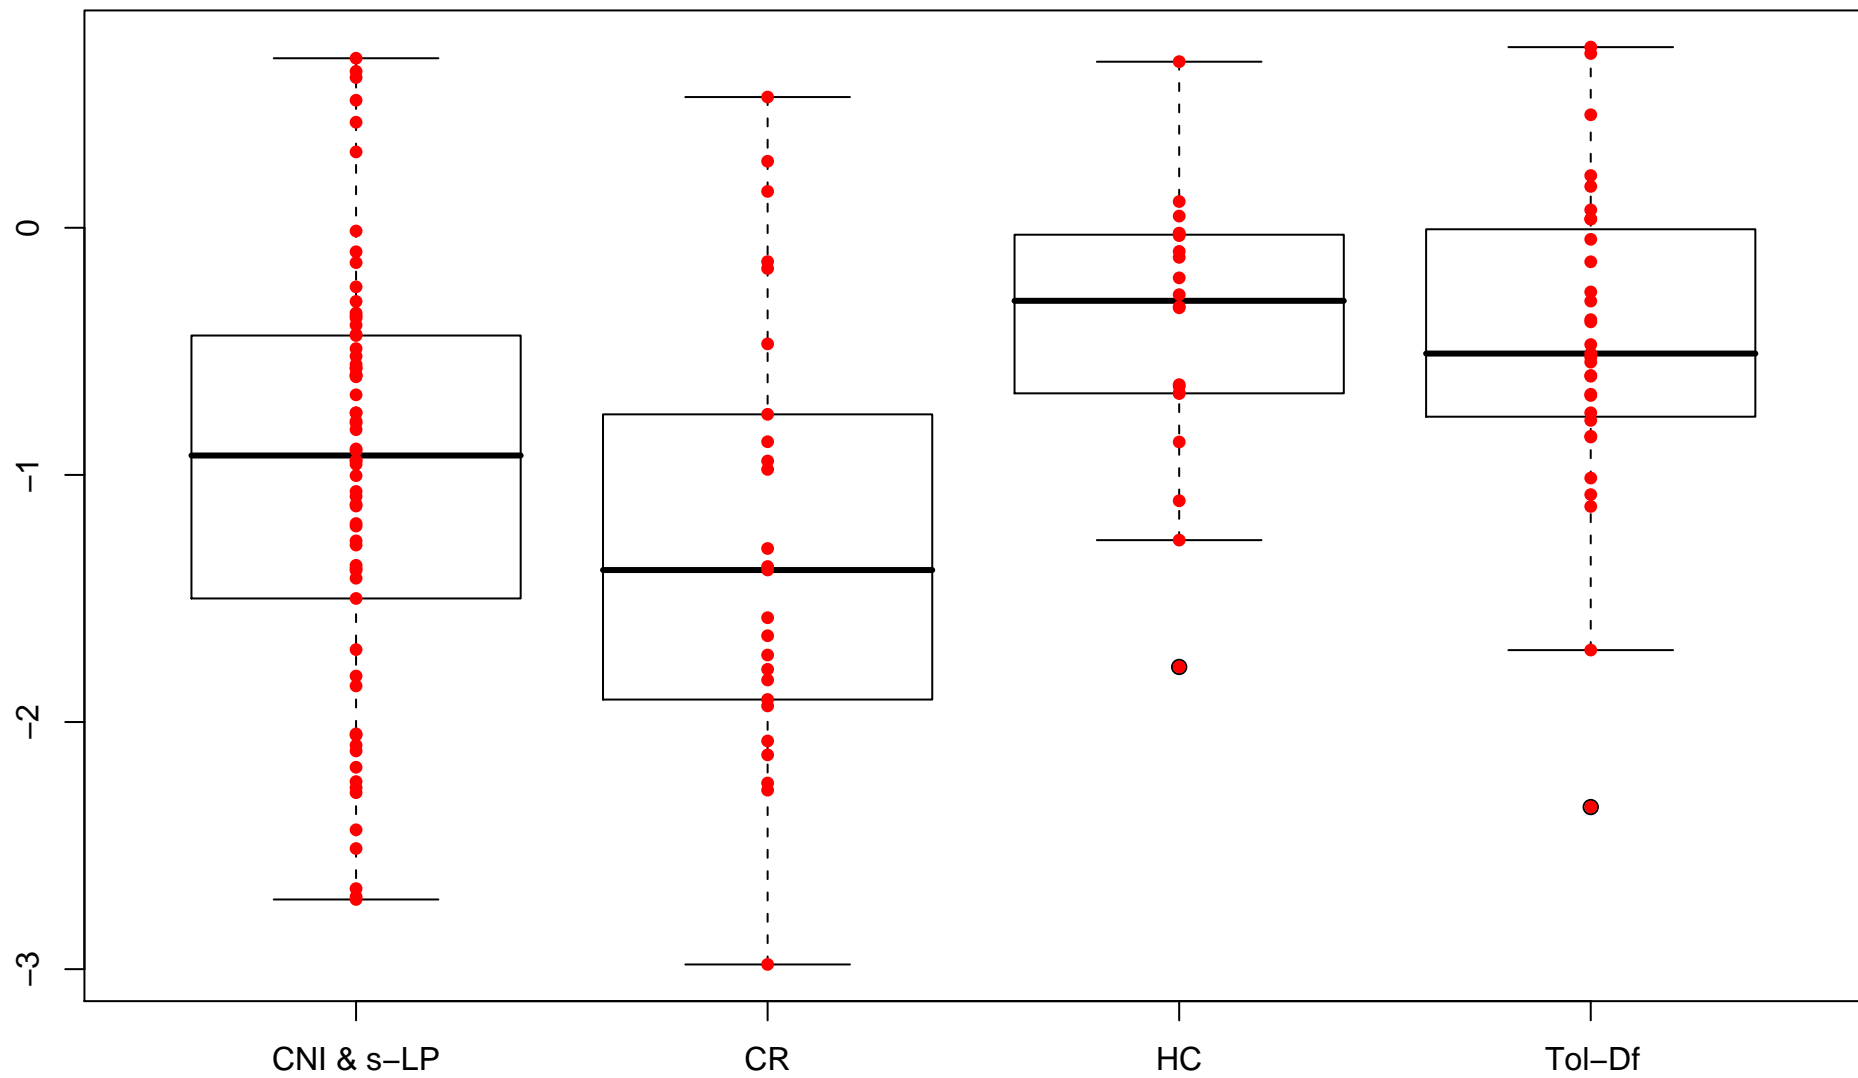

Rank 375 : IFT80  
7.494e-05

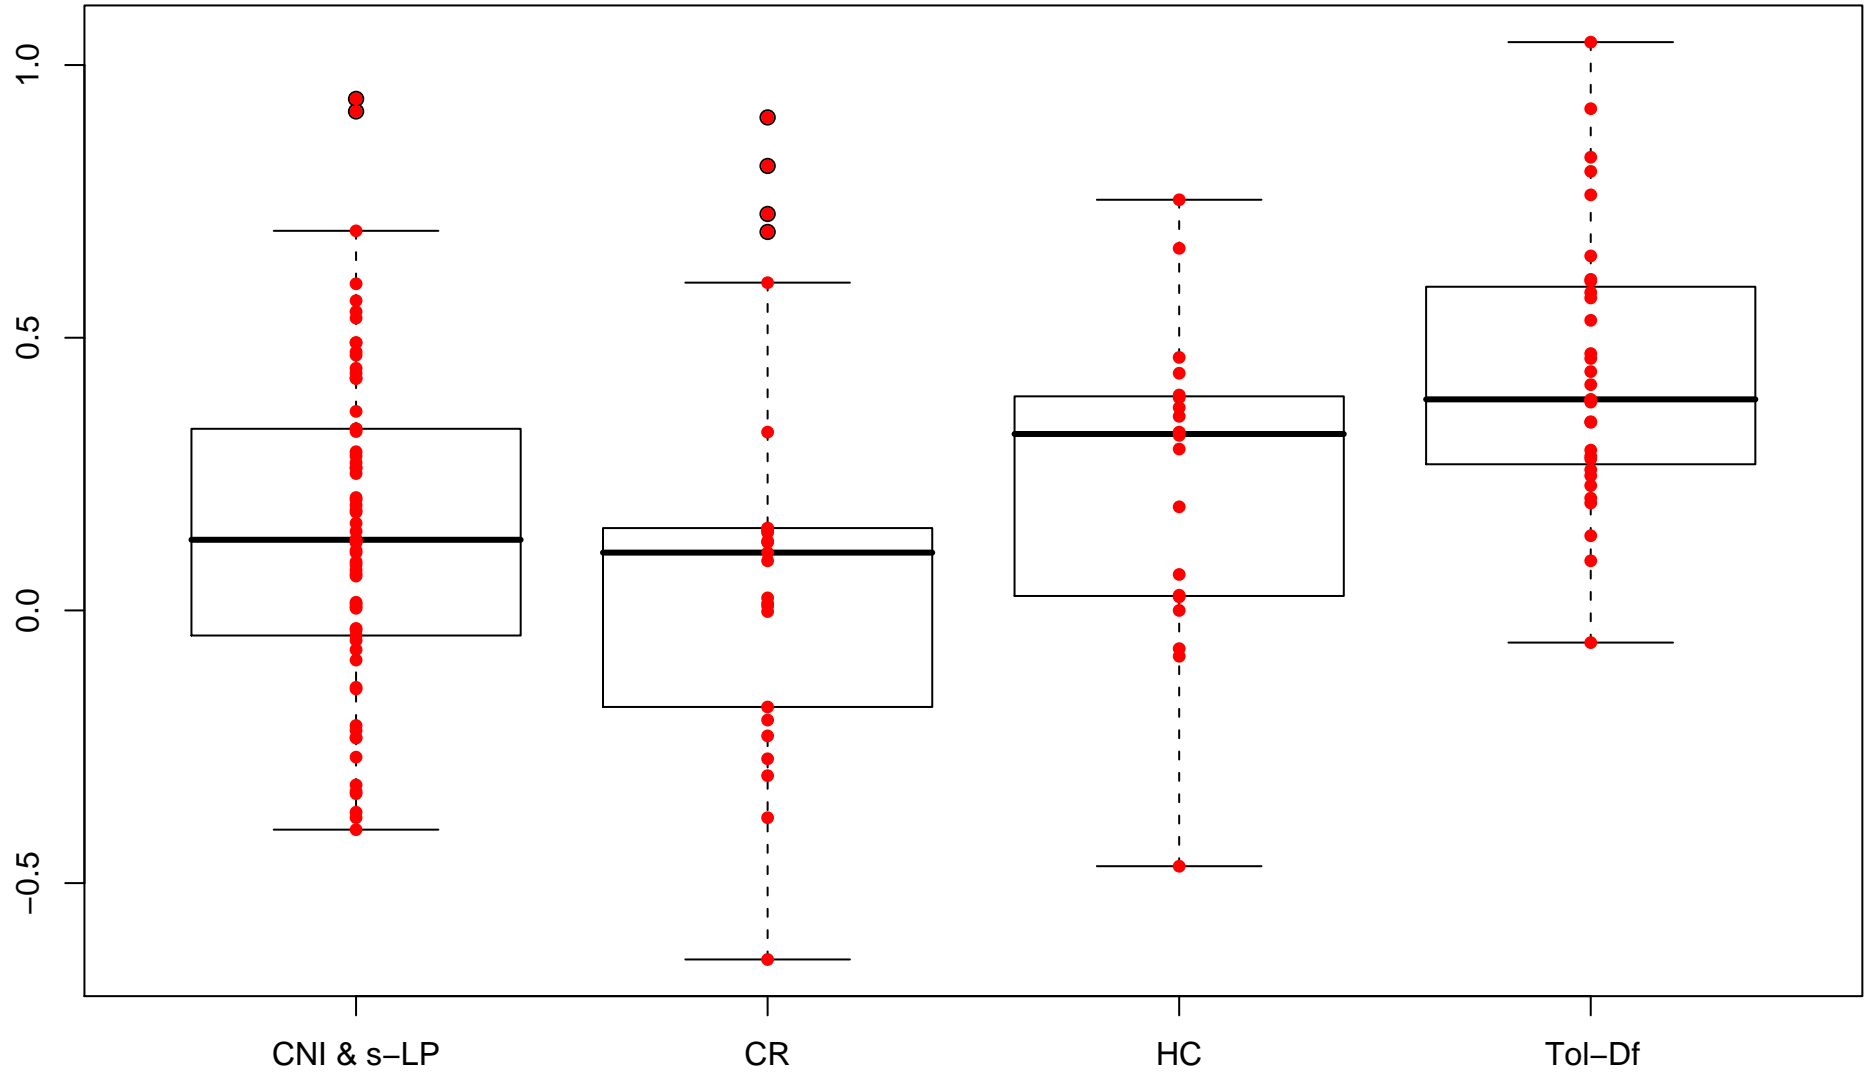



Rank 376 : BST1  
7.54e-05

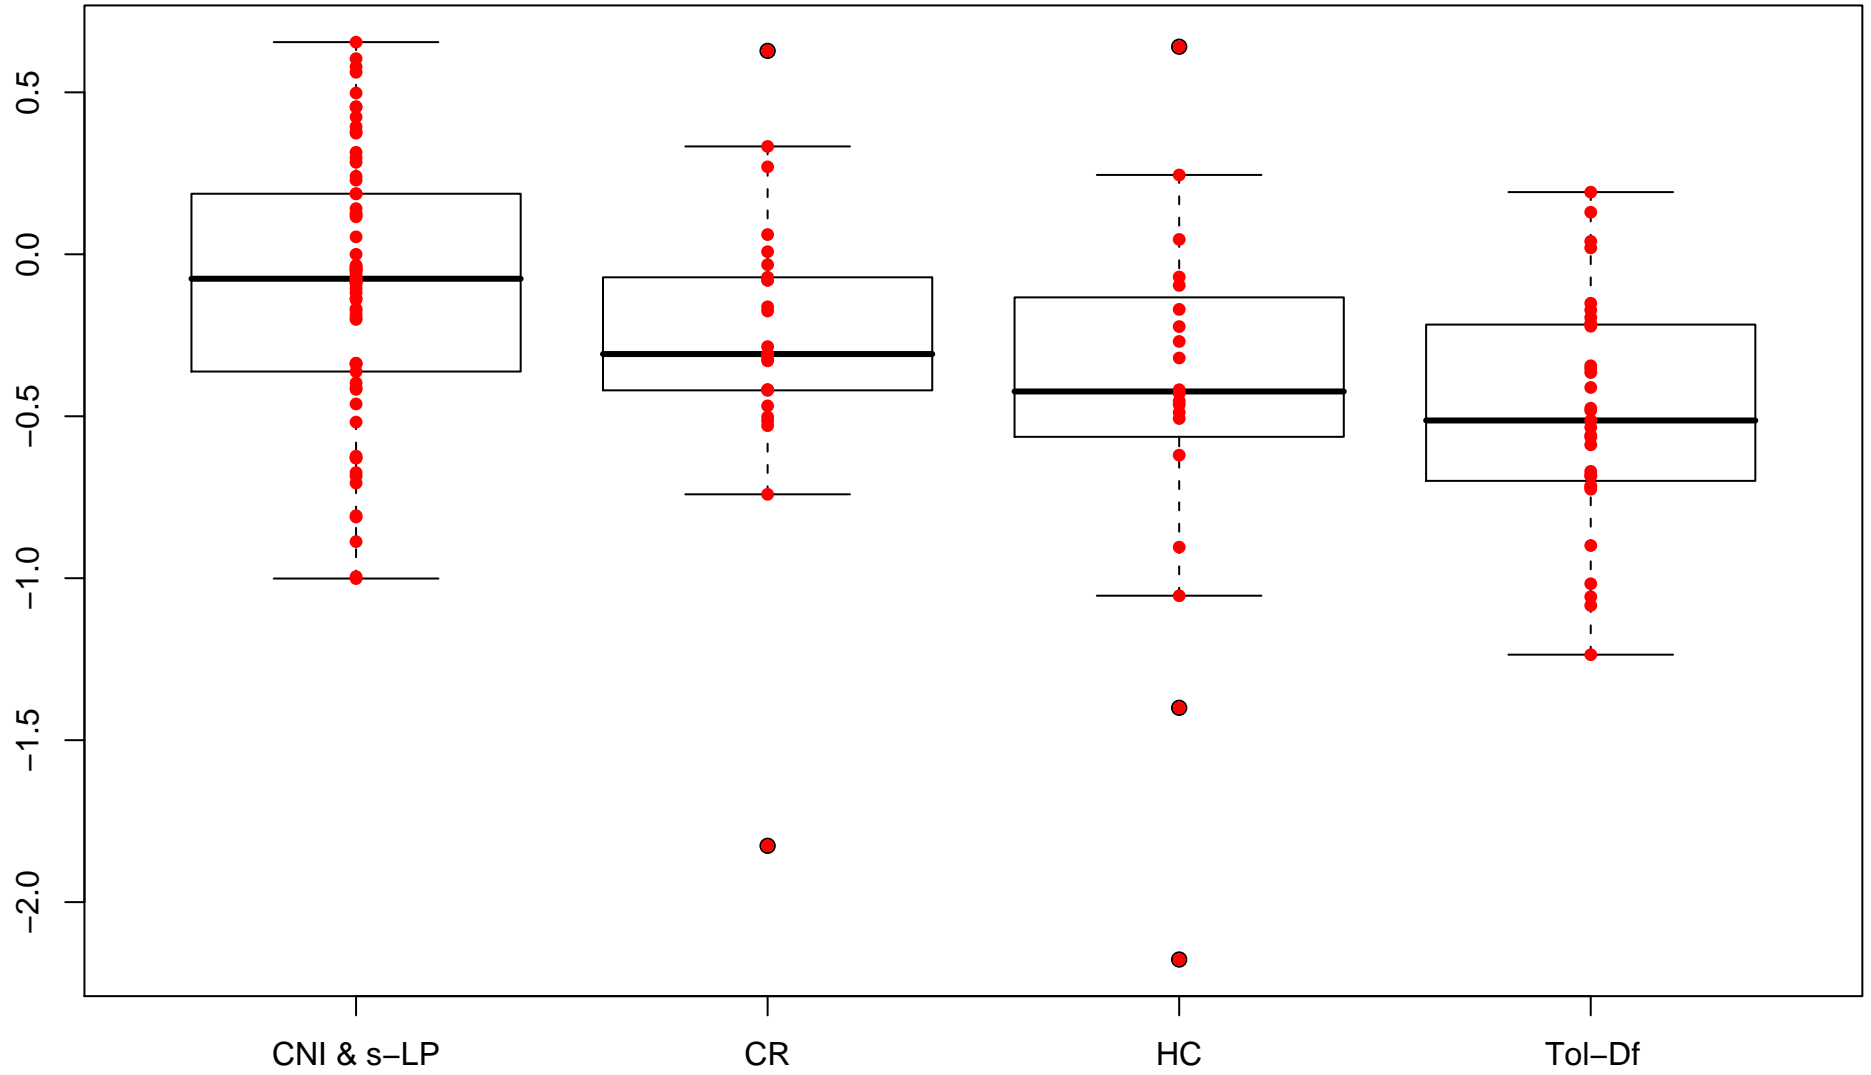

Rank 377 : HLA-DQA2  
7.556e-05

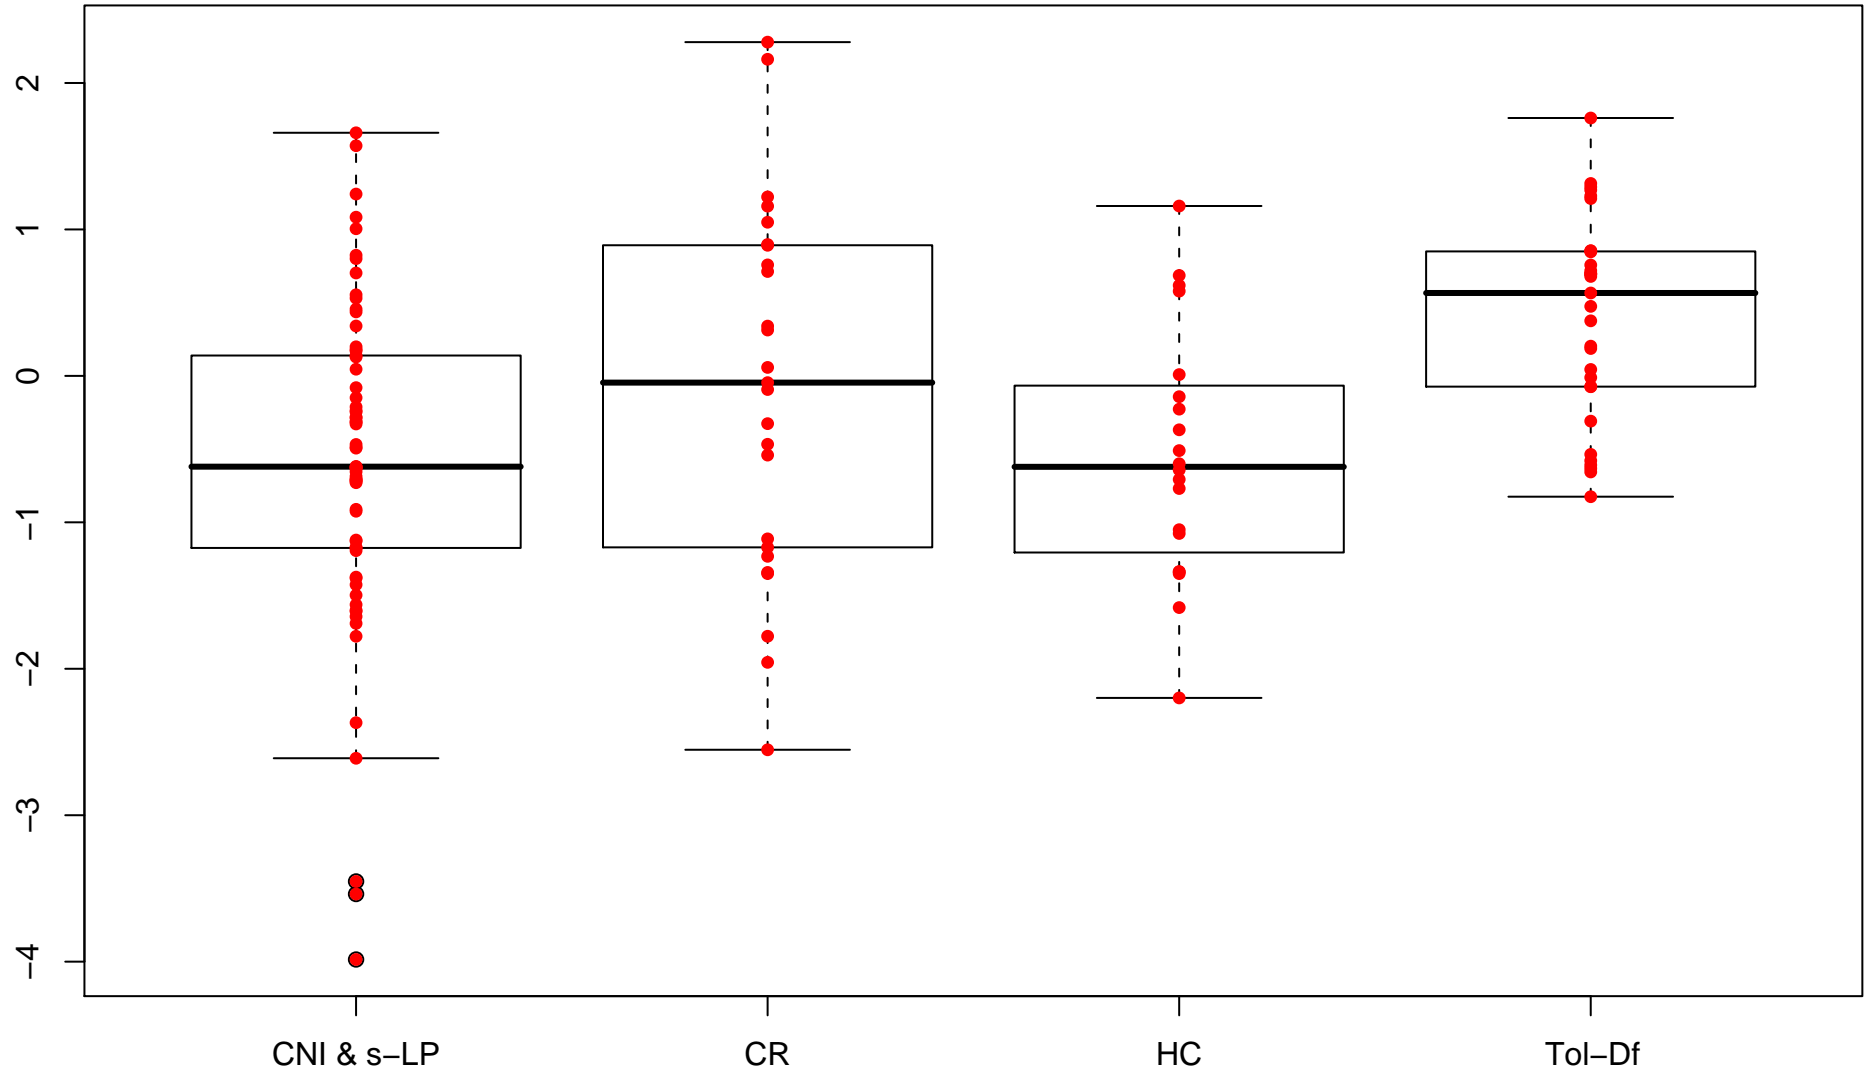

Rank 378 : VSTM3  
7.72e-05

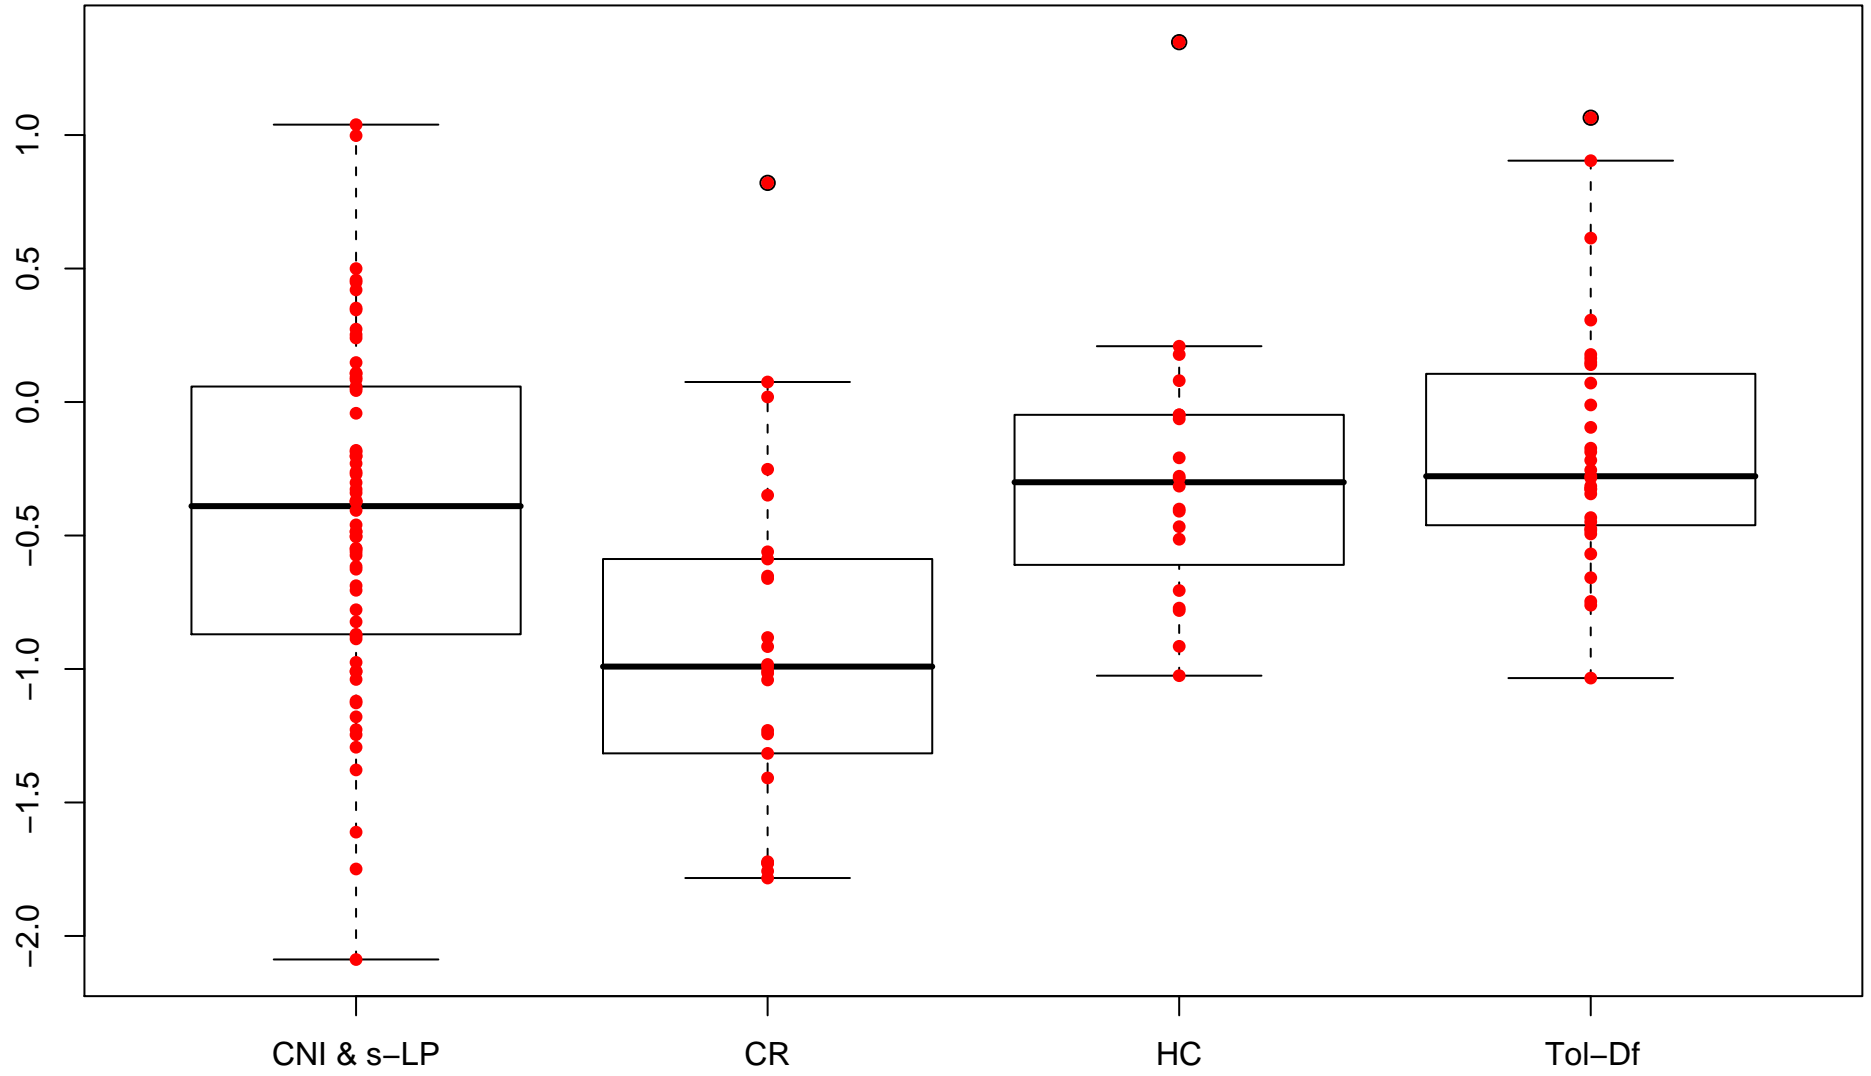

Rank 379 : CCDC123  
7.85e-05

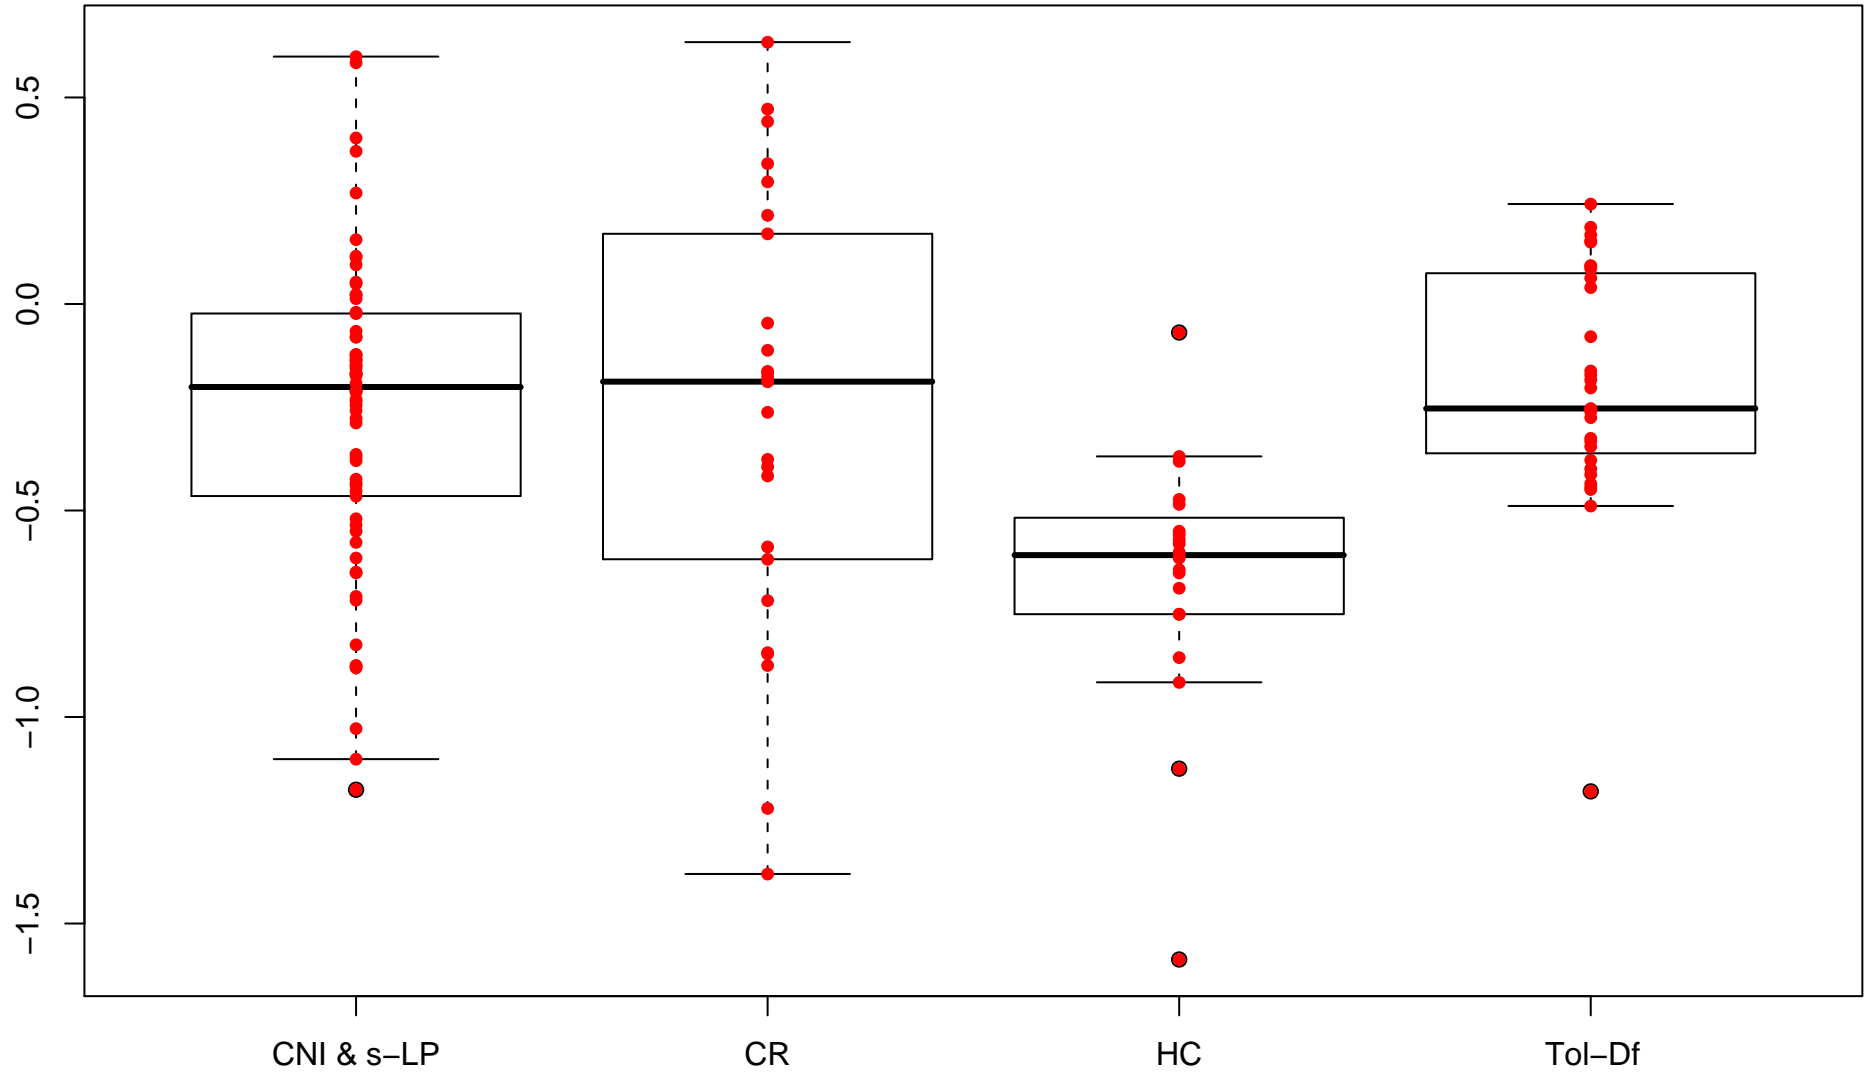

Rank 380 : AMIGO1  
7.979e-05

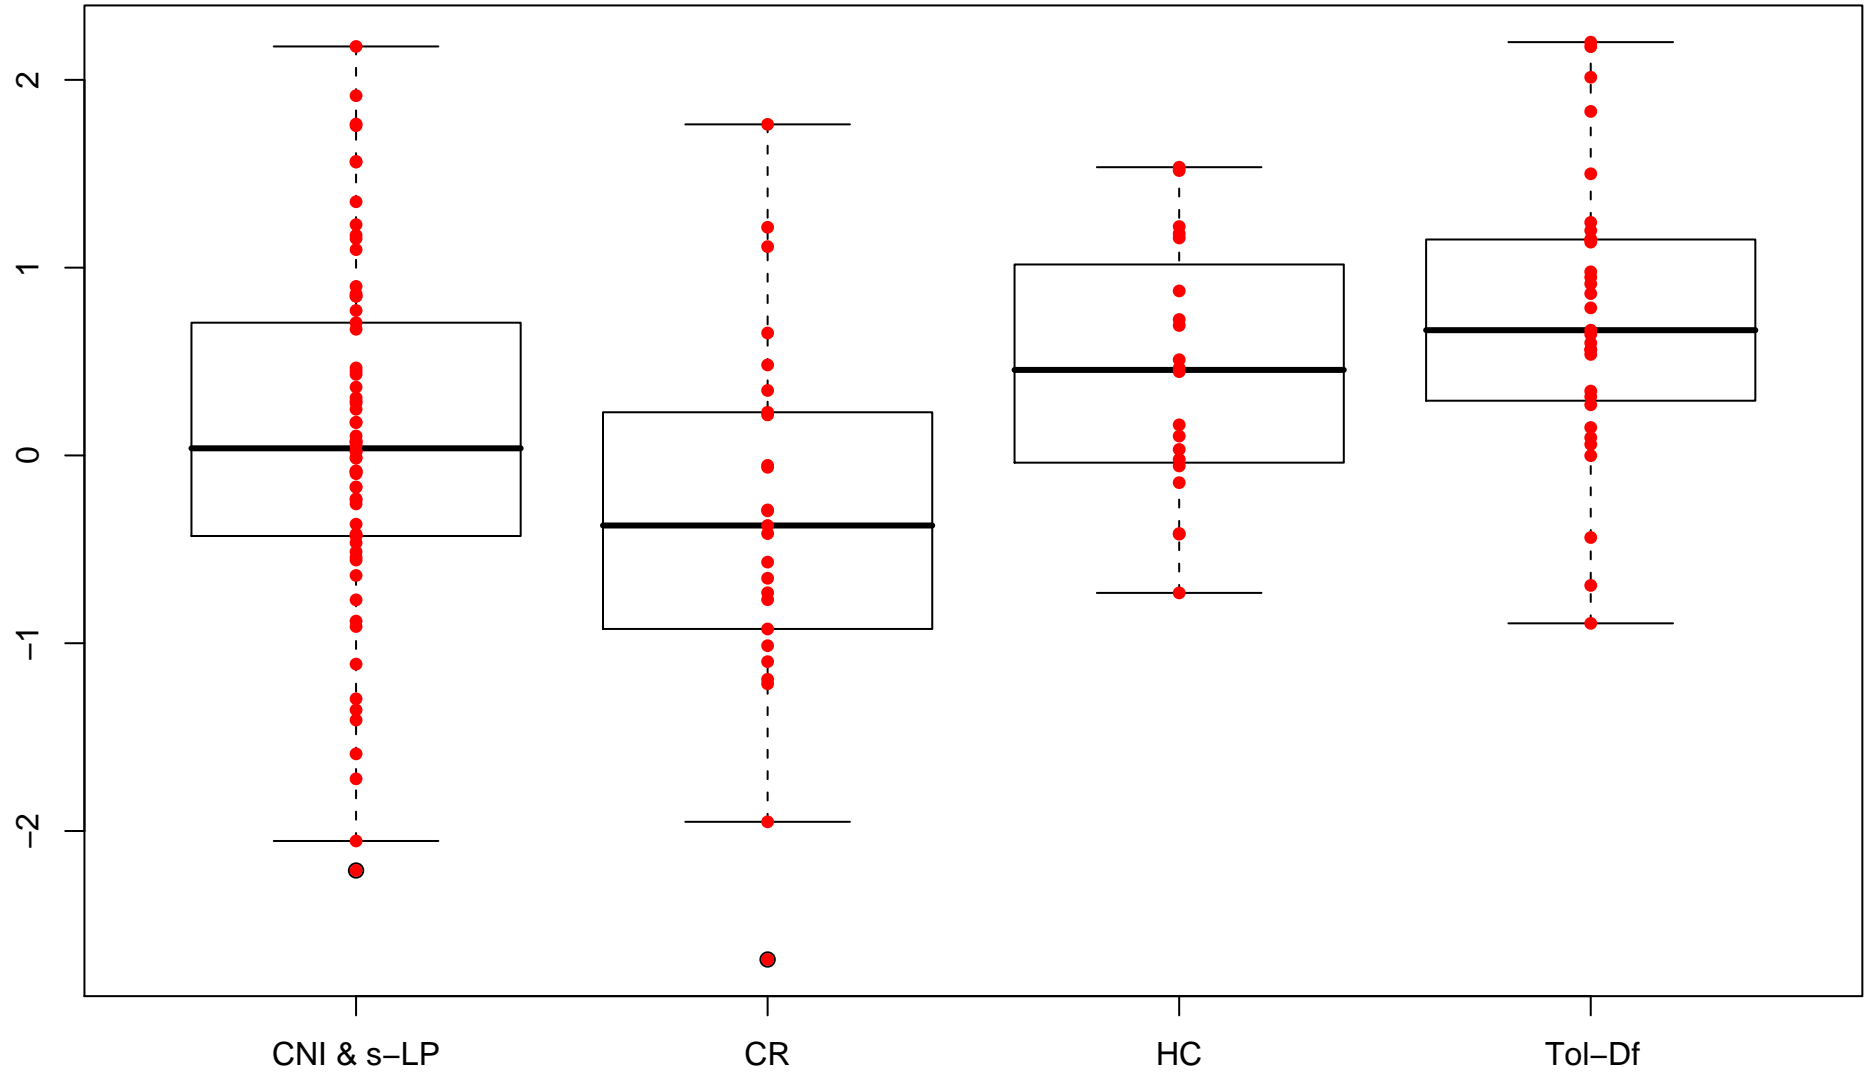

Rank 381 : NDUFB5  
8.072e-05

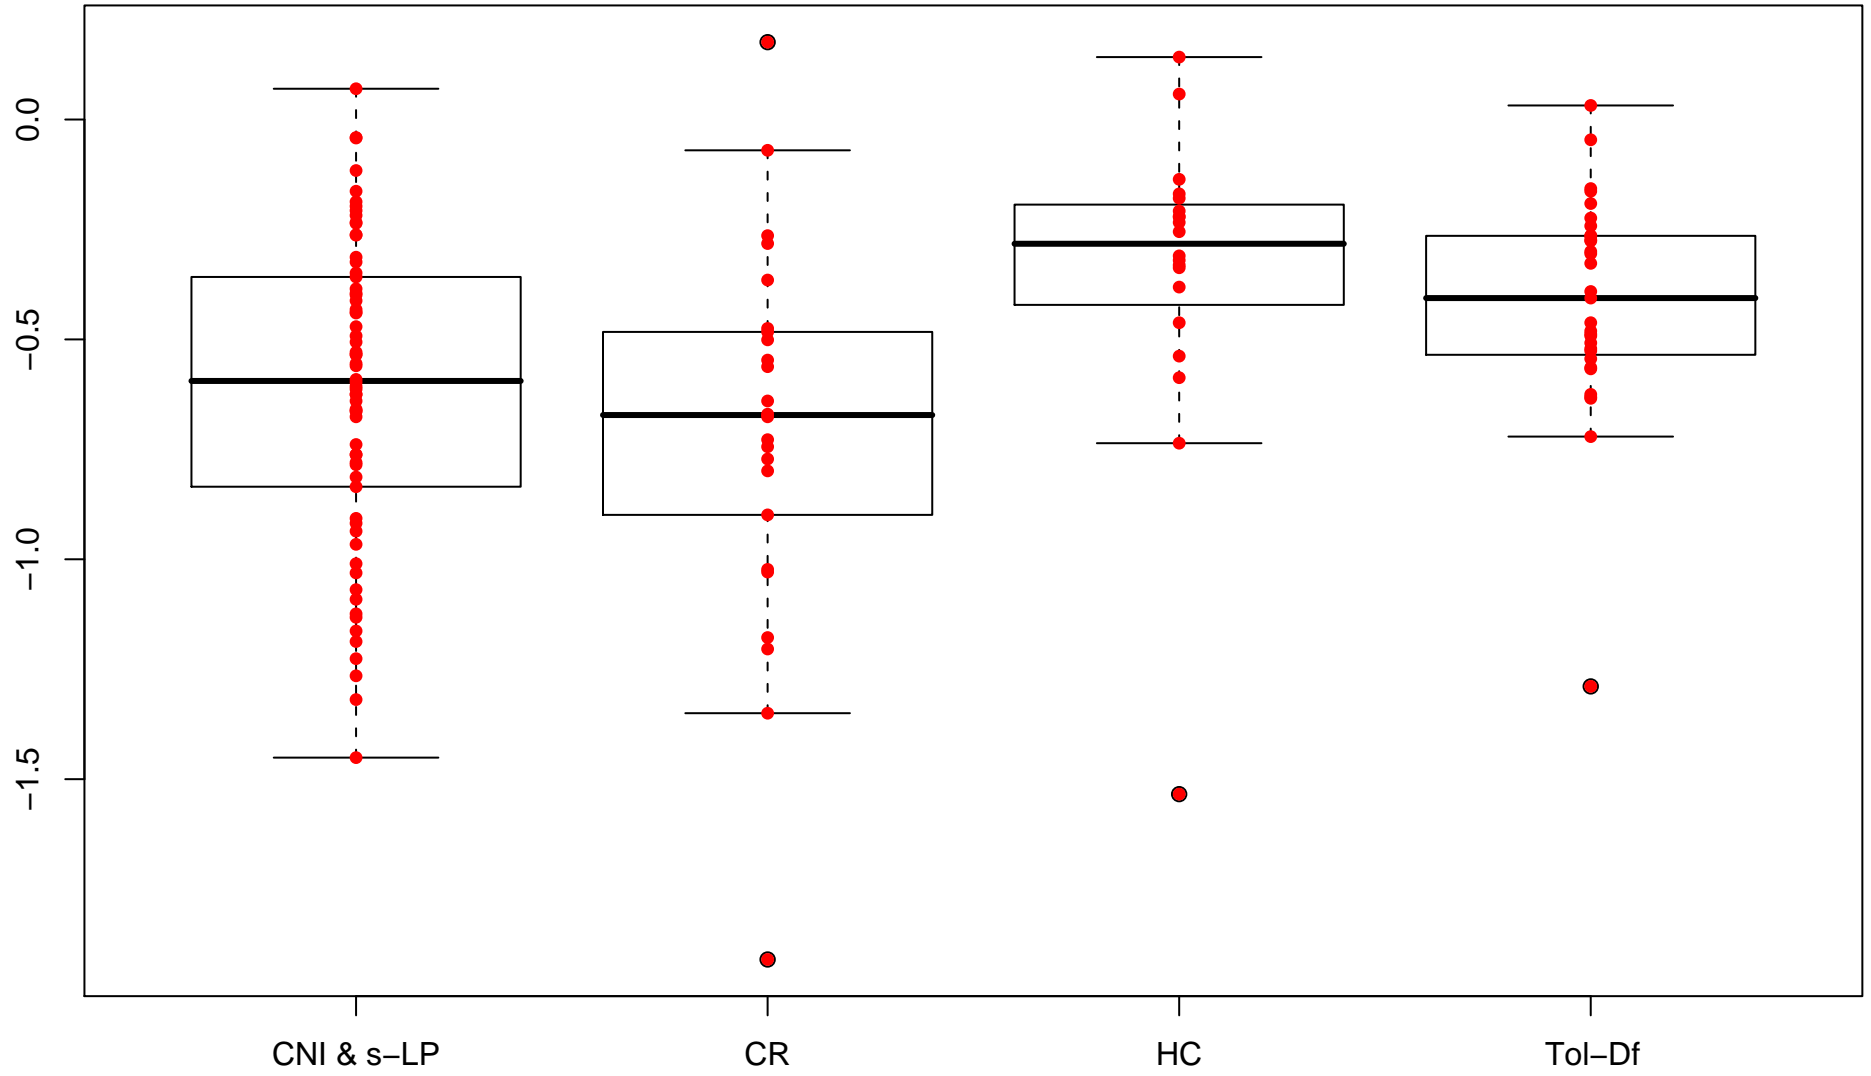

Rank 382 : PIP4K2A  
8.092e-05

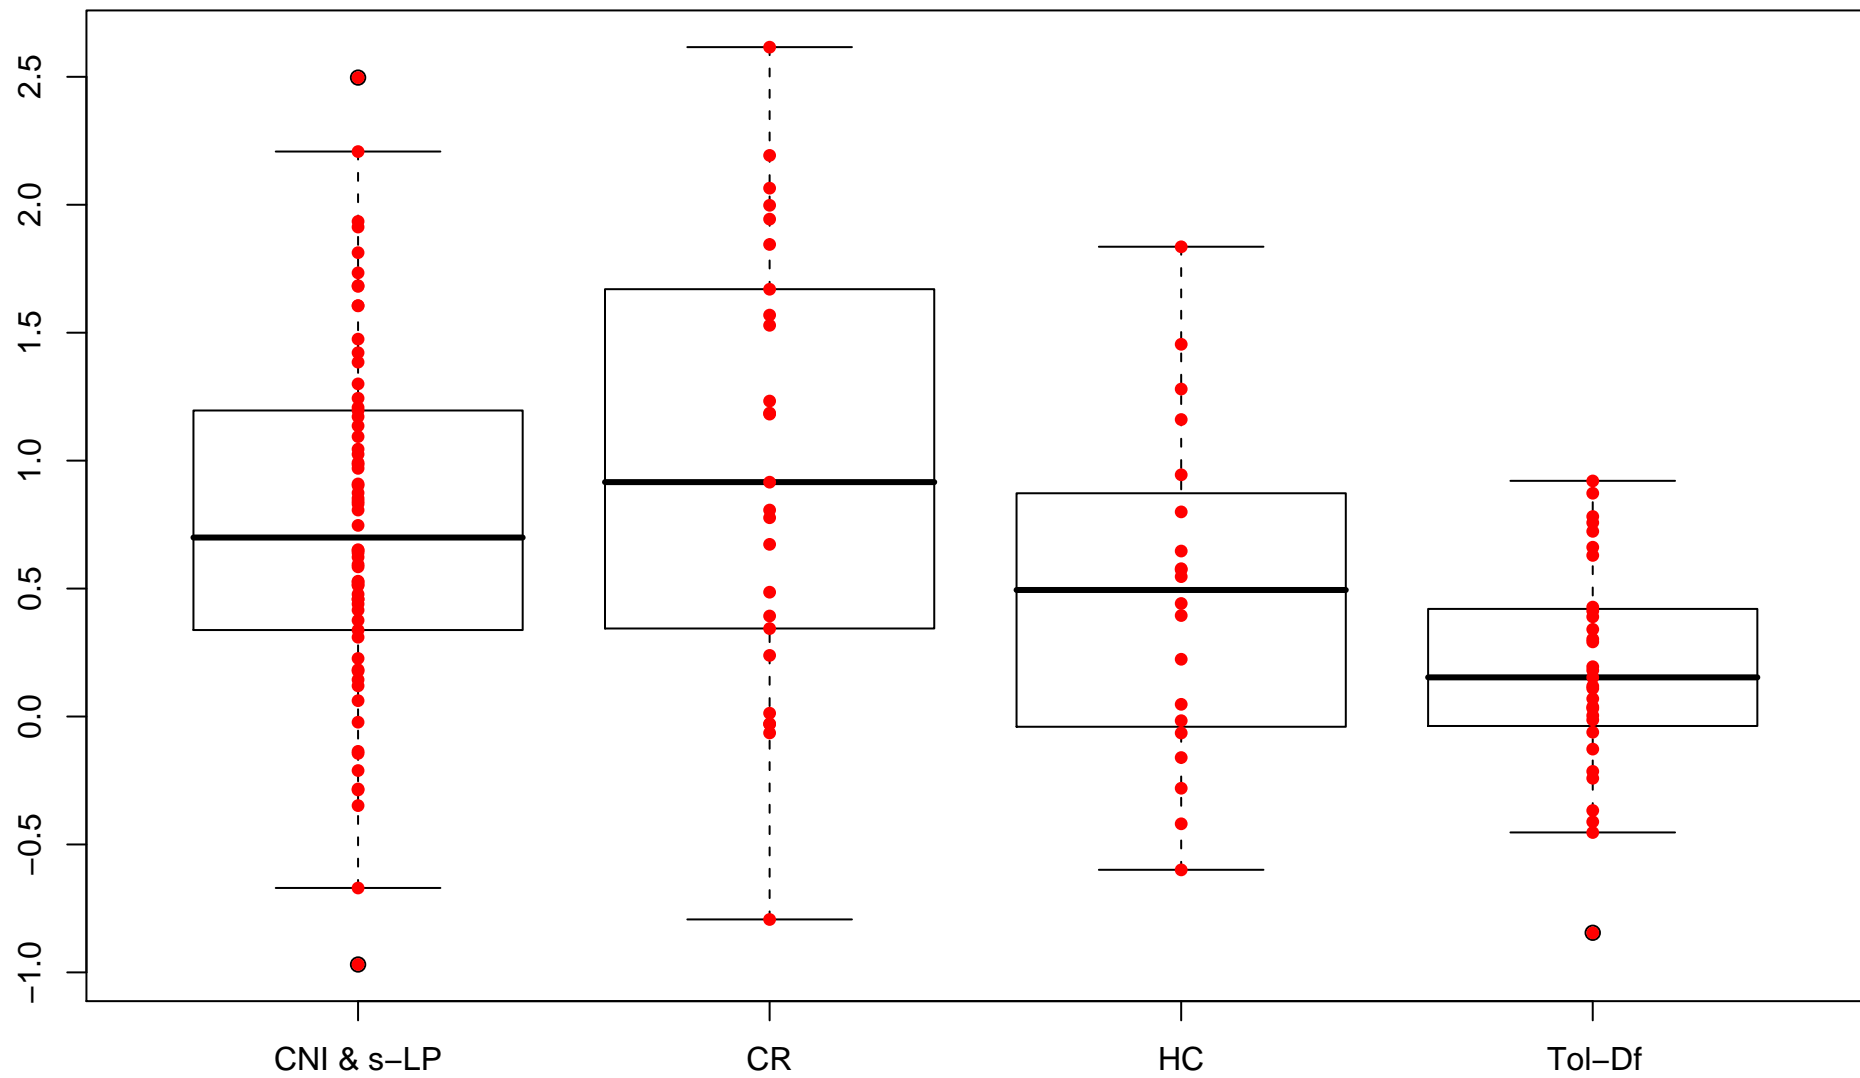

Rank 383 : BZRAP1  
8.248e-05

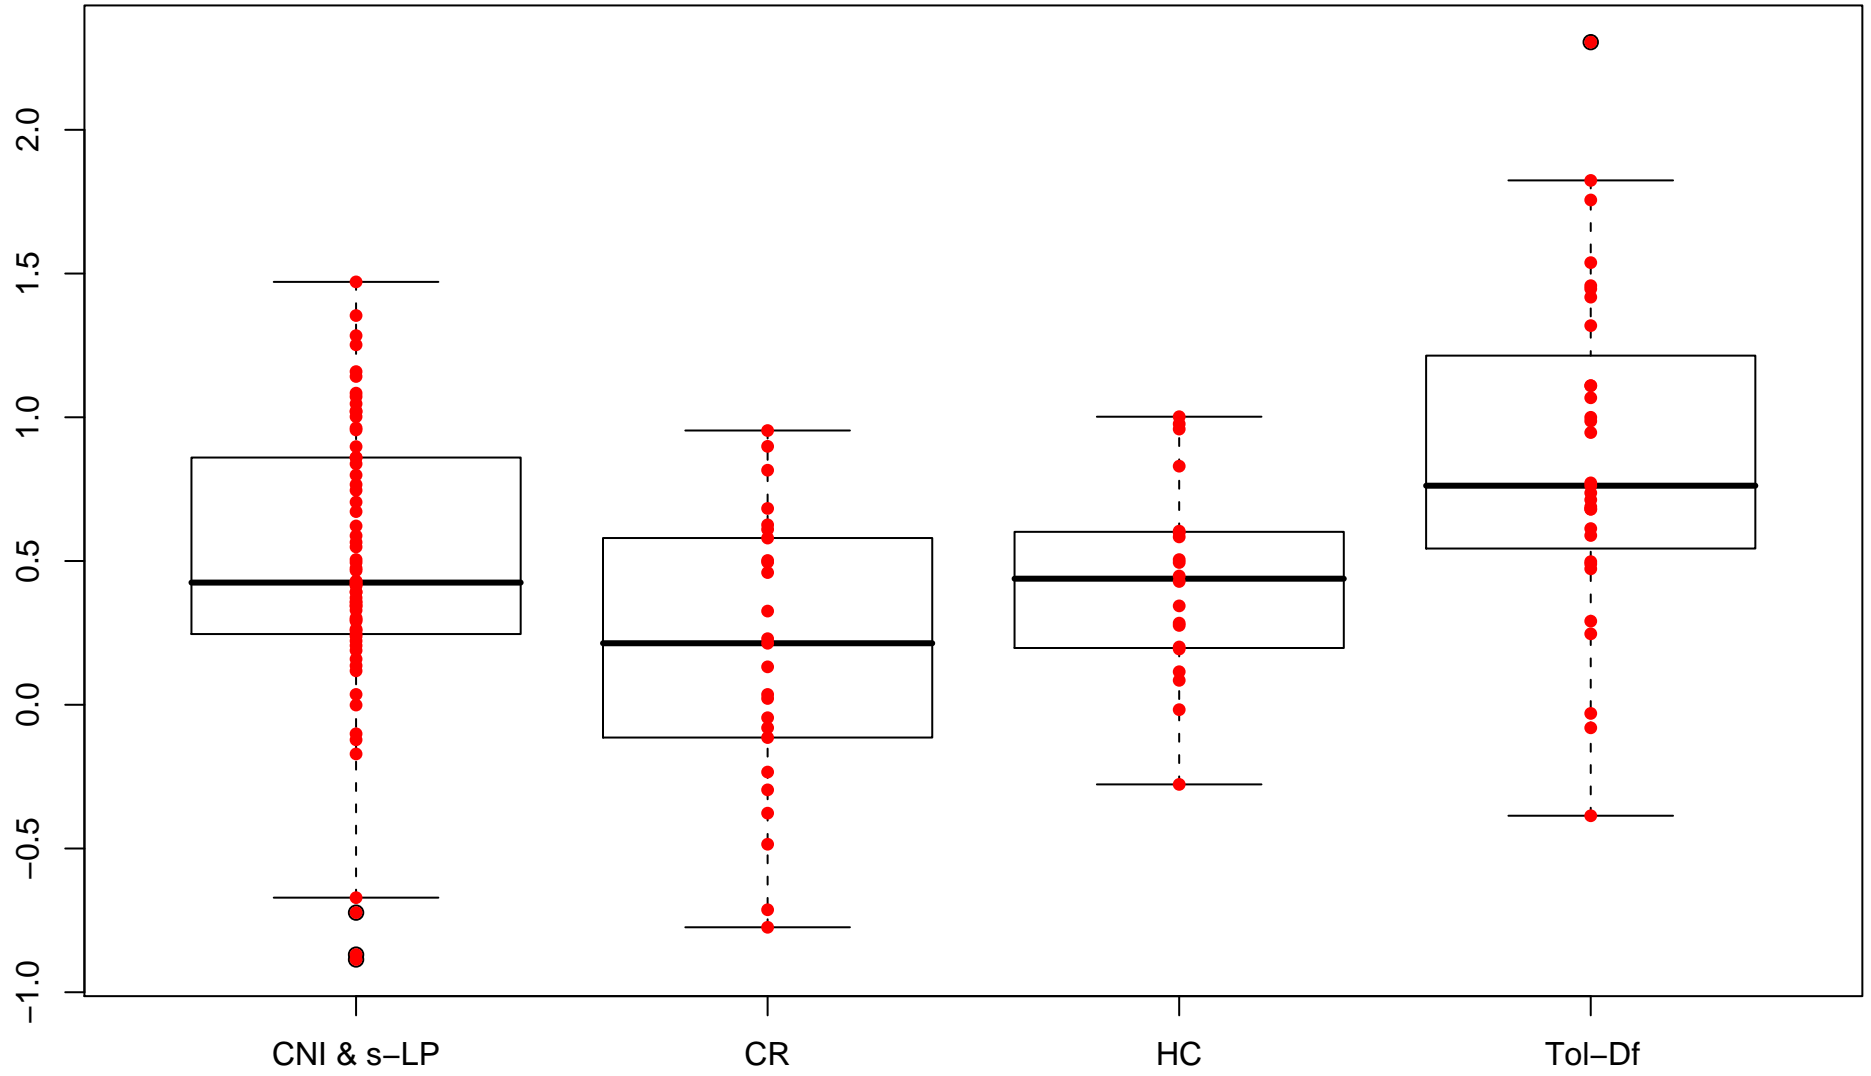



Rank 384 : FURIN  
8.431e-05

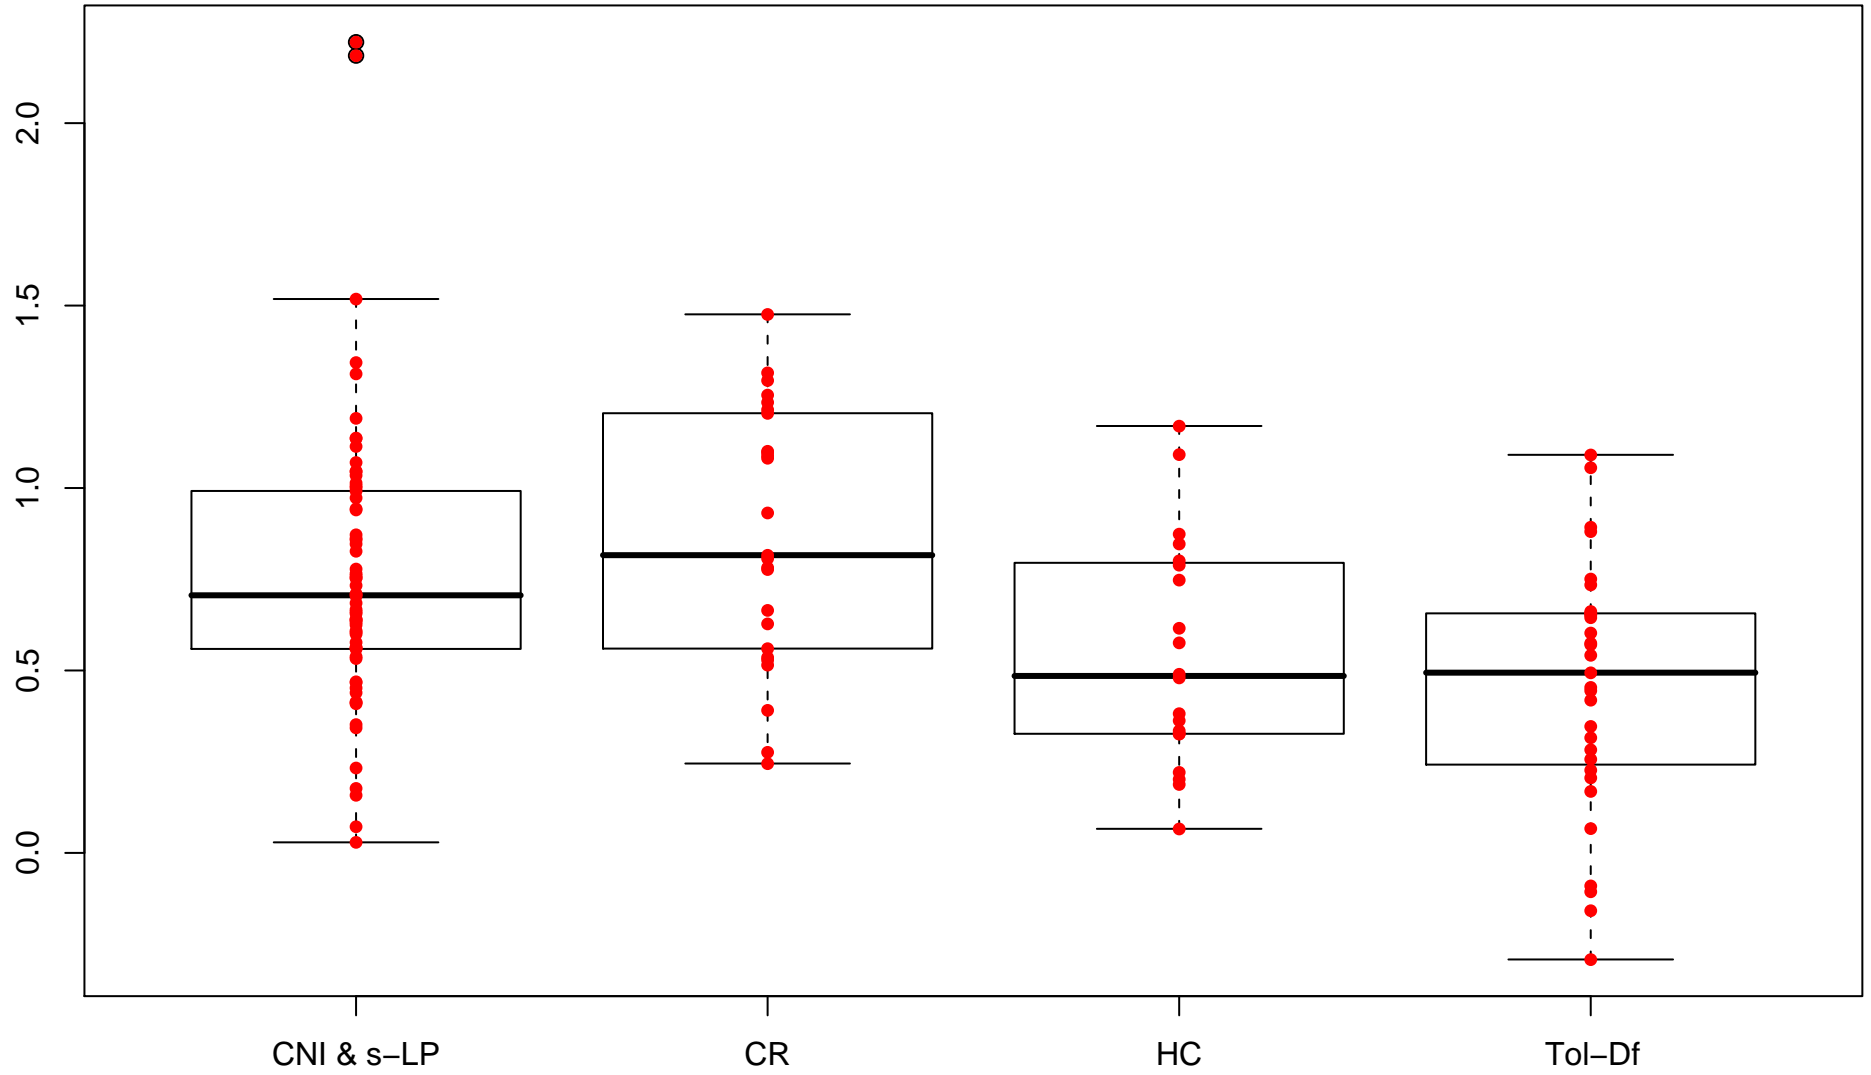

Rank 385 : GNG7  
8.478e-05

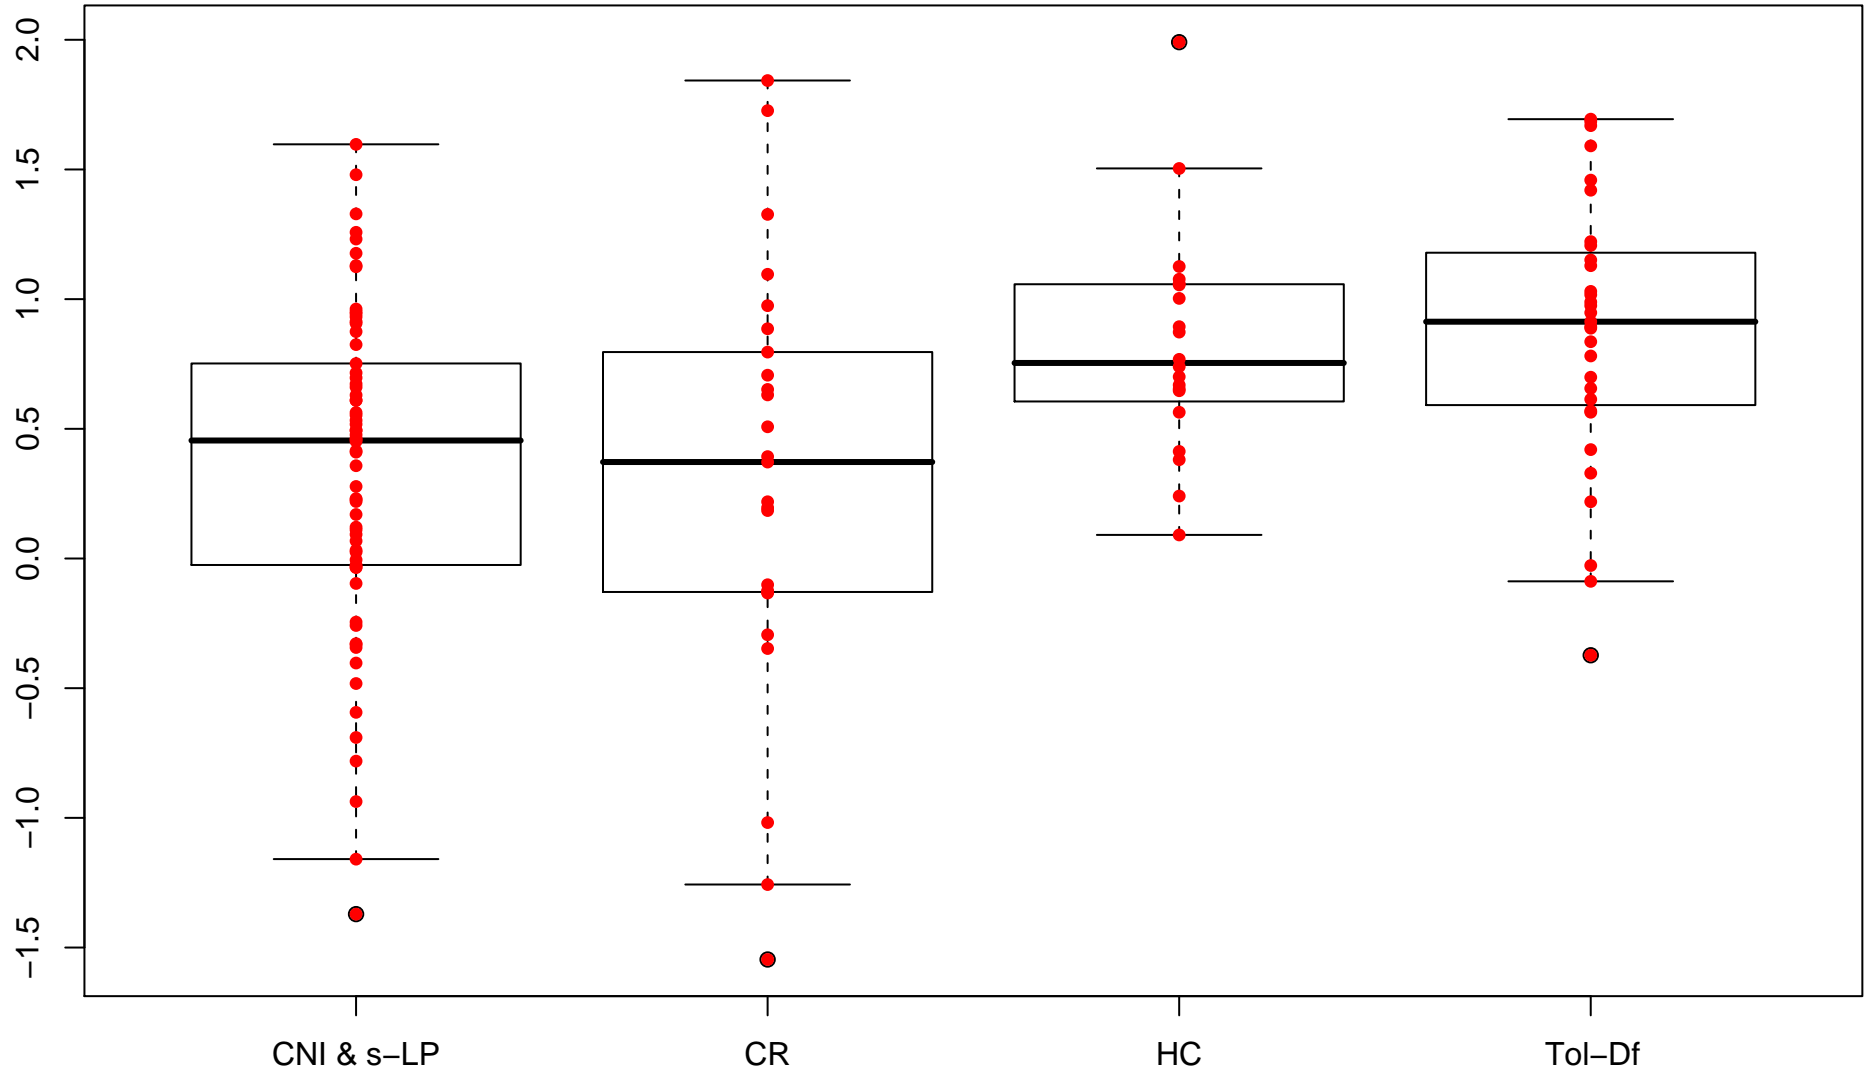

Rank 386 : DOK3  
8.512e-05

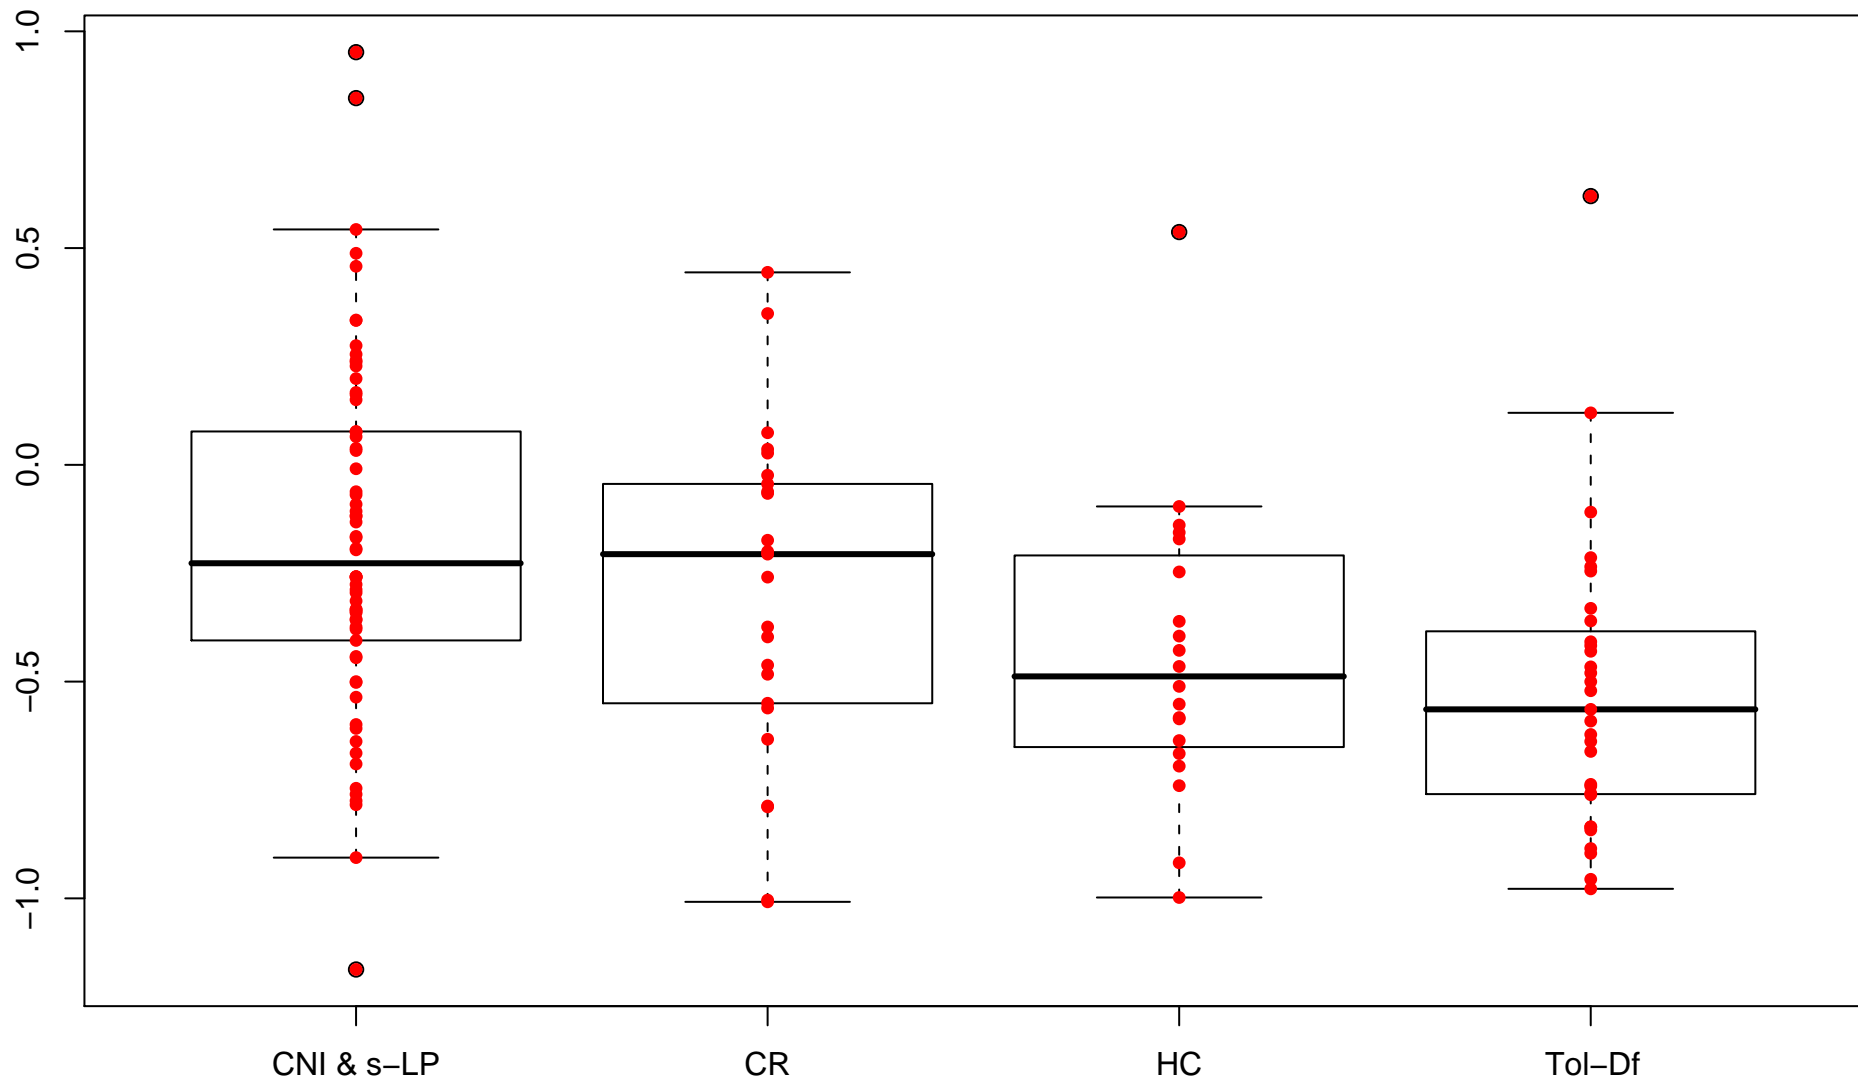

Rank 387 : KIAA0888  
8.597e-05

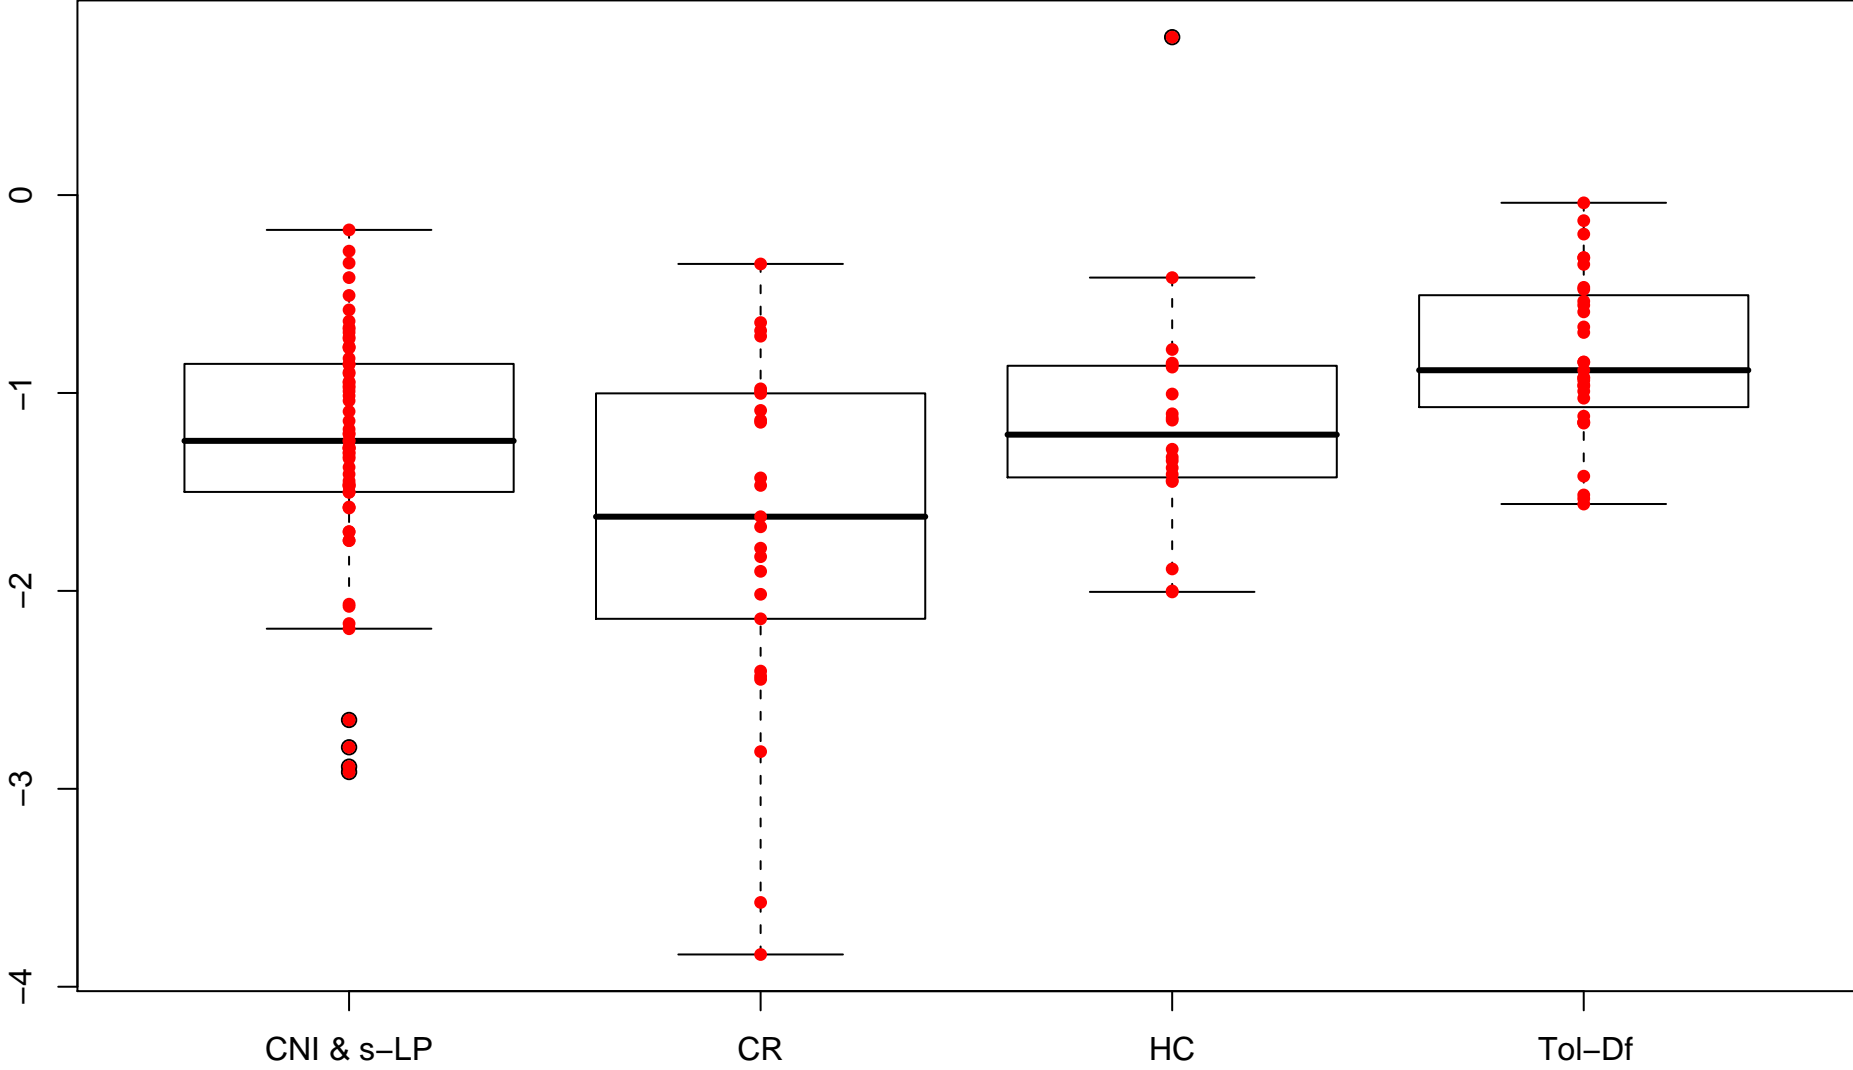

Rank 388 : DHRS12  
8.728e-05

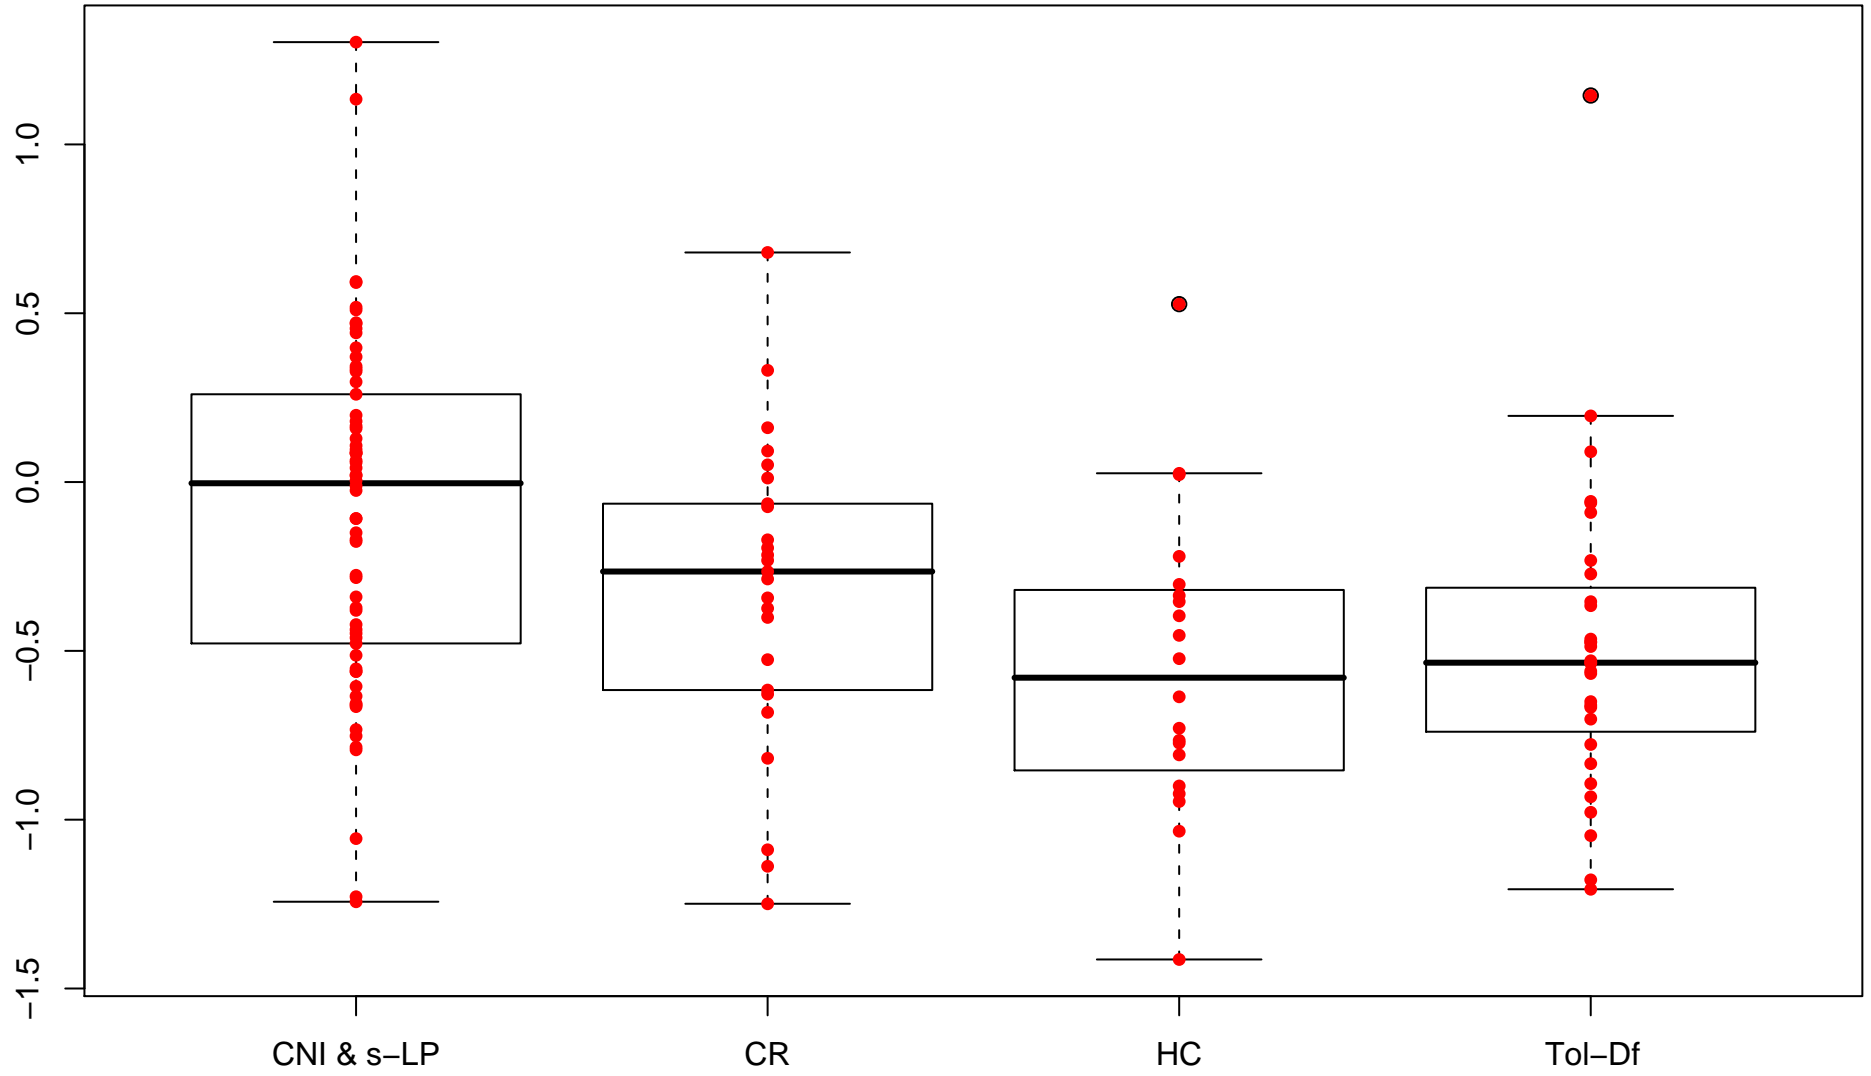

Rank 389 : SLPI  
8.994e-05

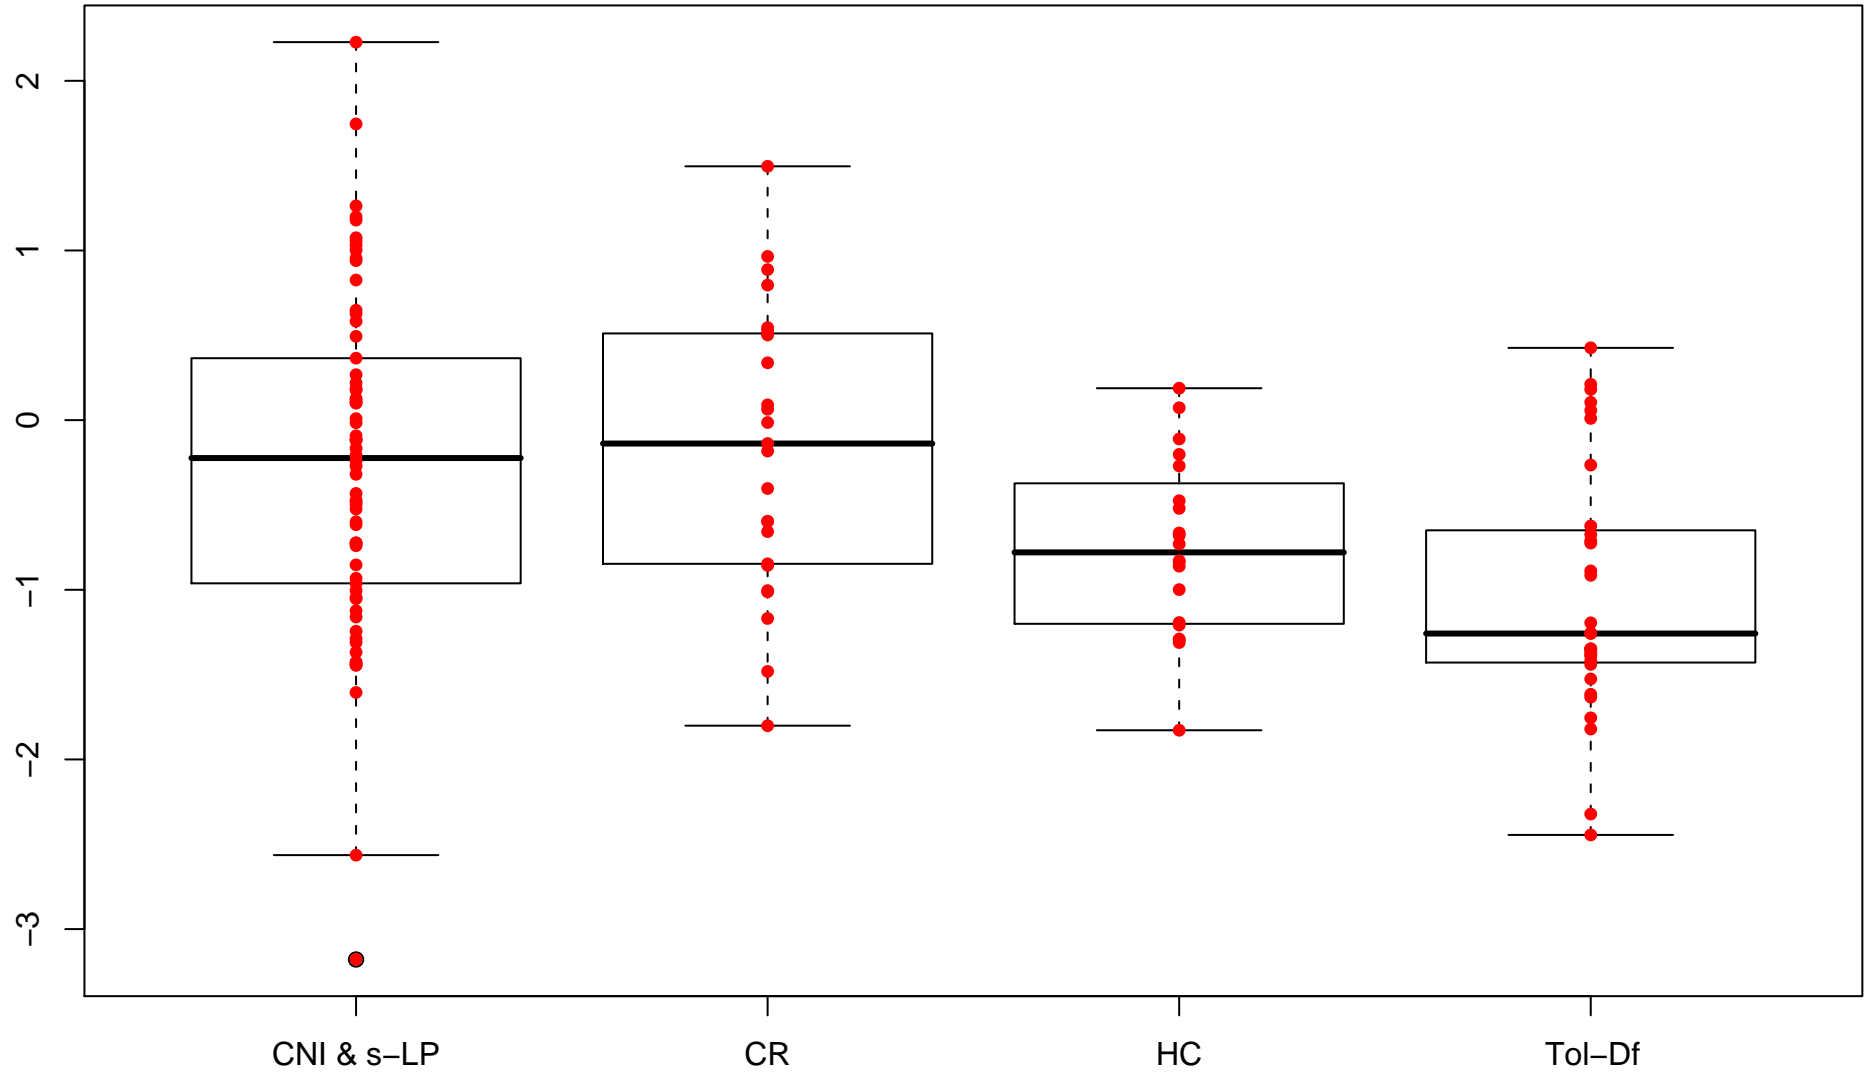

Rank 390 : GLDC  
9.078e-05

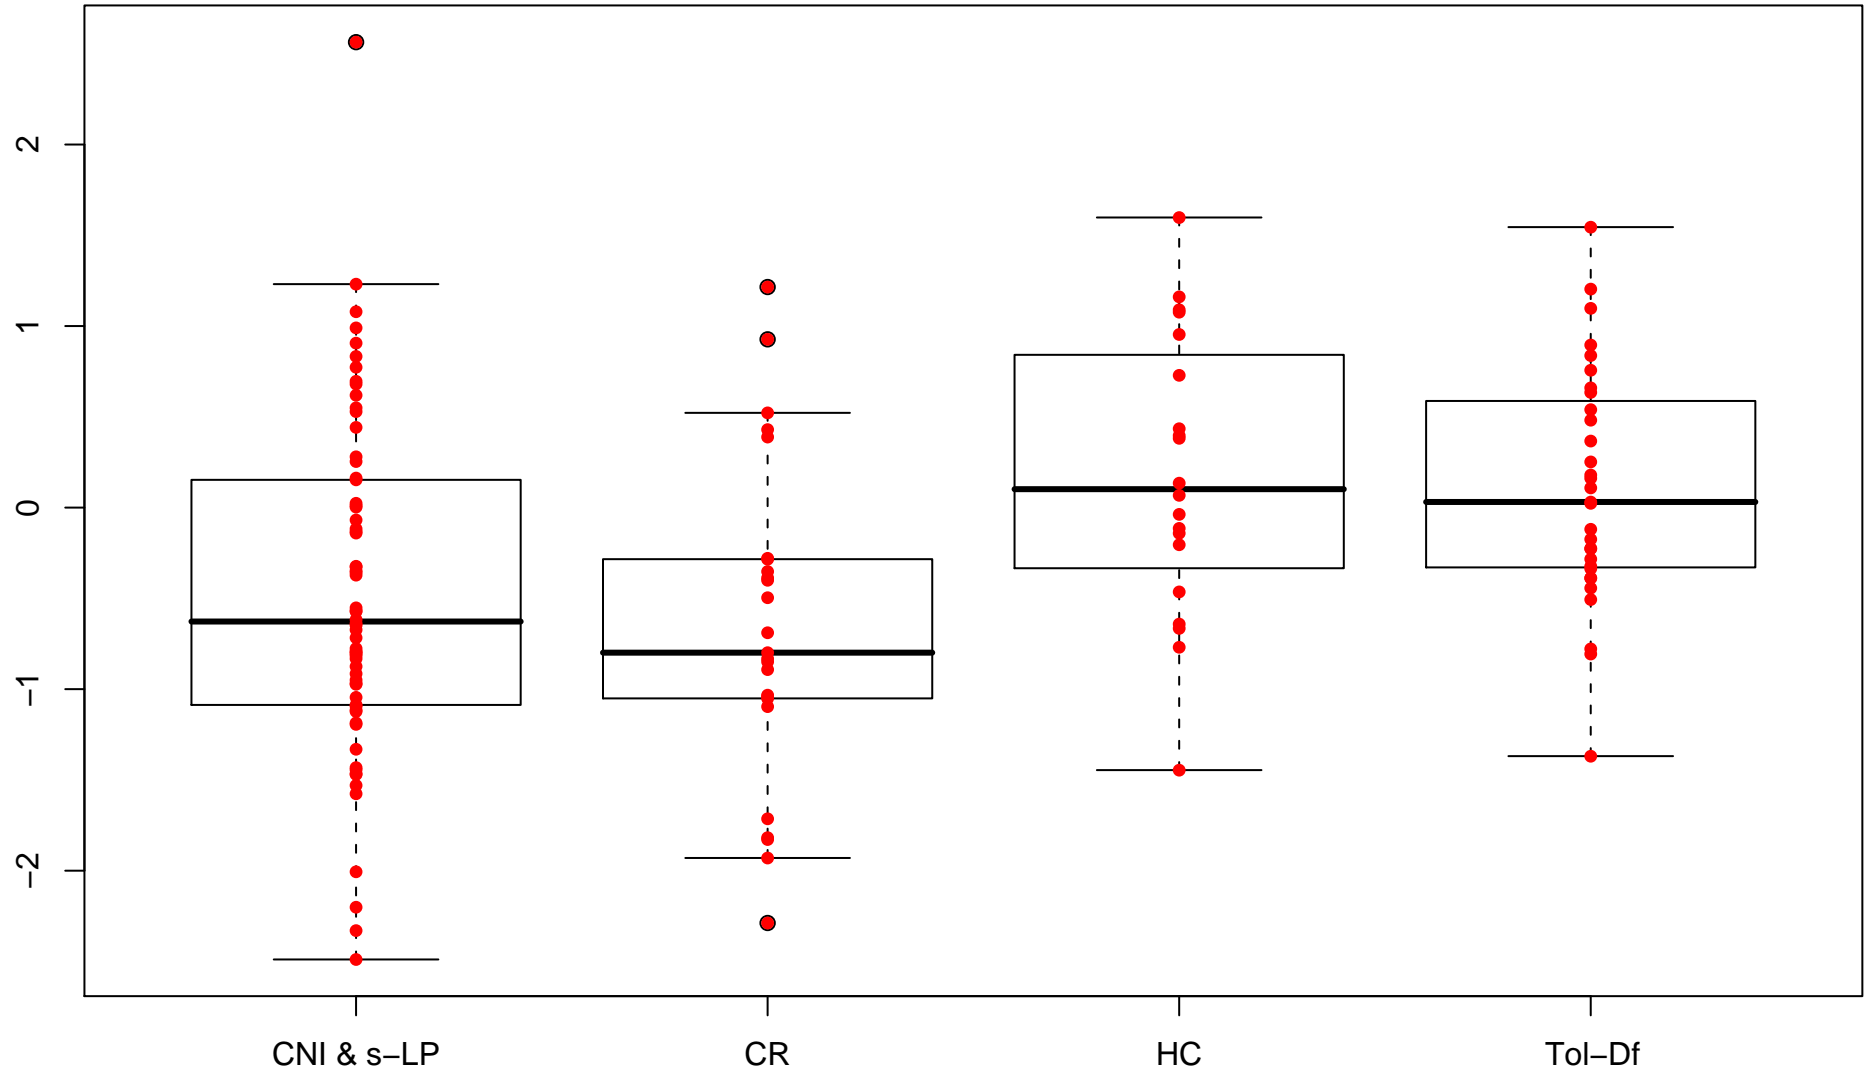

Rank 391 : RSL1D1  
9.415e-05

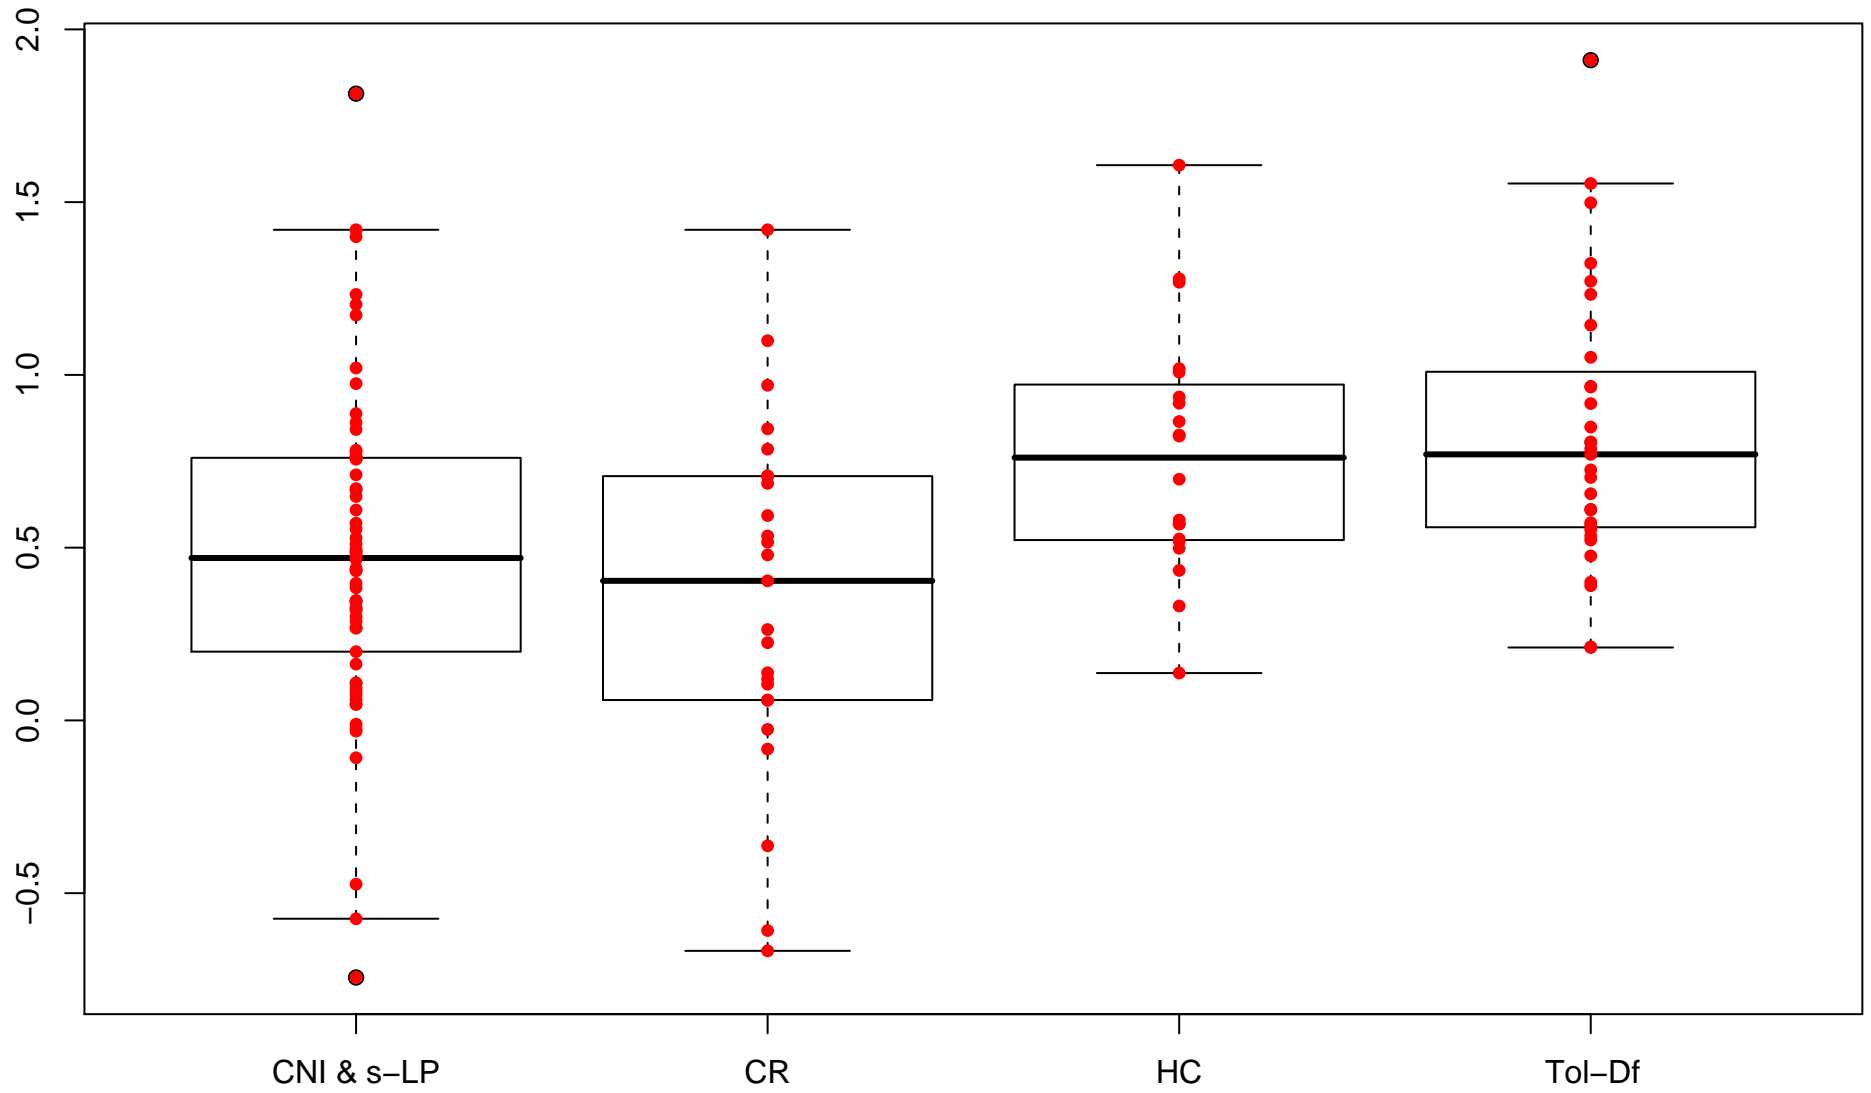



Rank 392 : PTMA  
9.517e-05

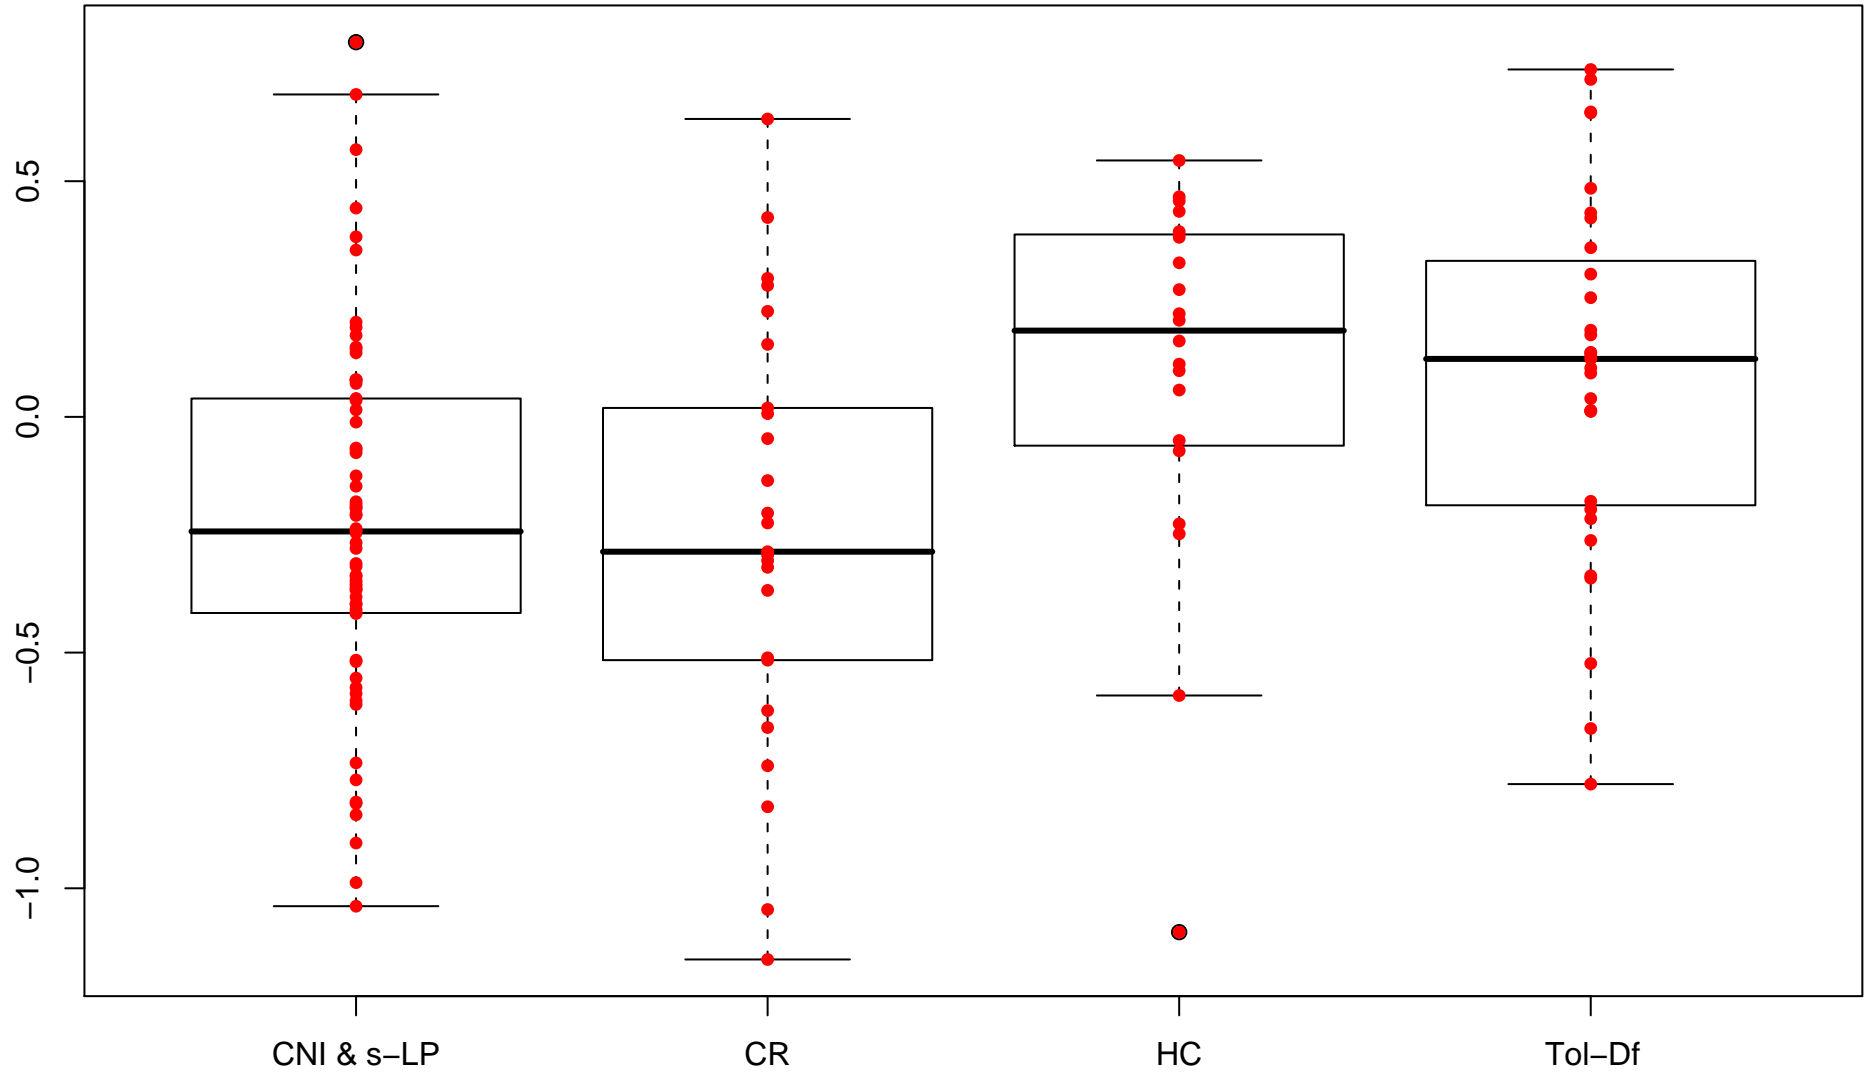

Rank 393 : CDK4  
9.595e-05

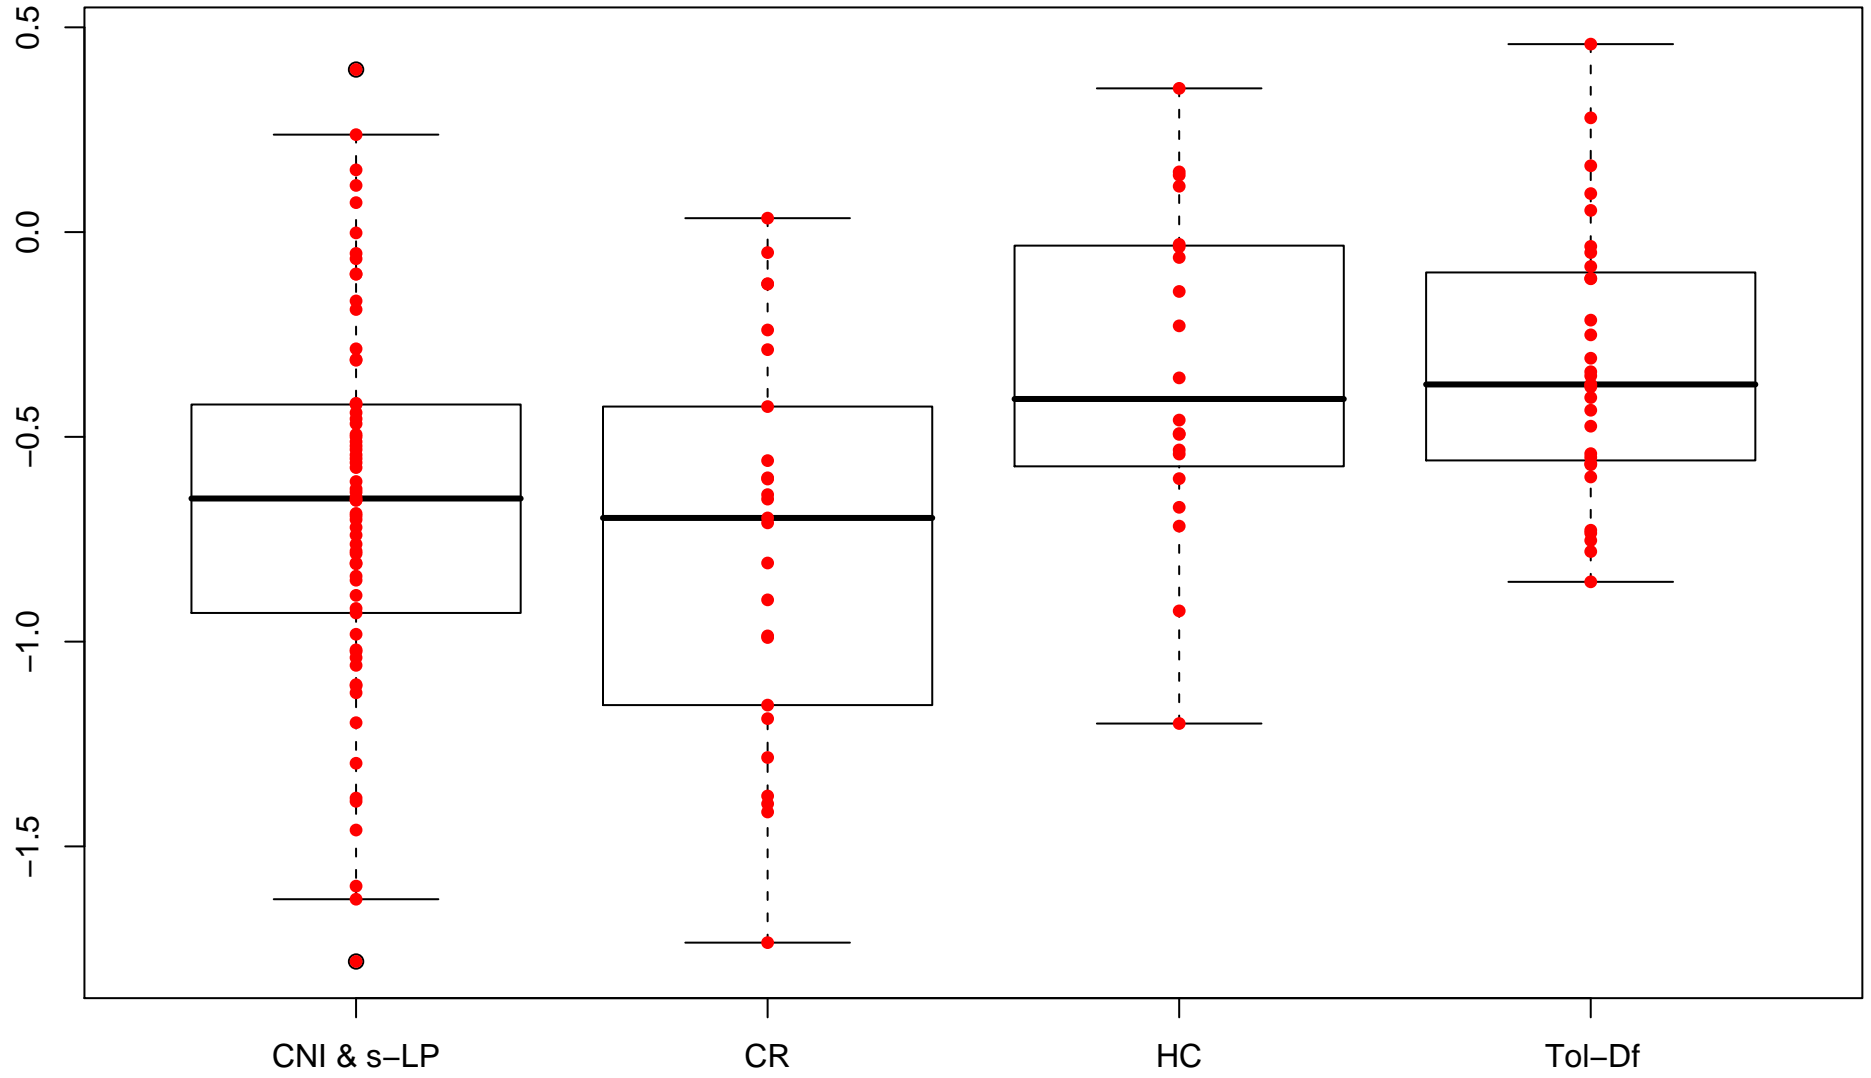

Rank 394 : BC033983  
9.735e-05

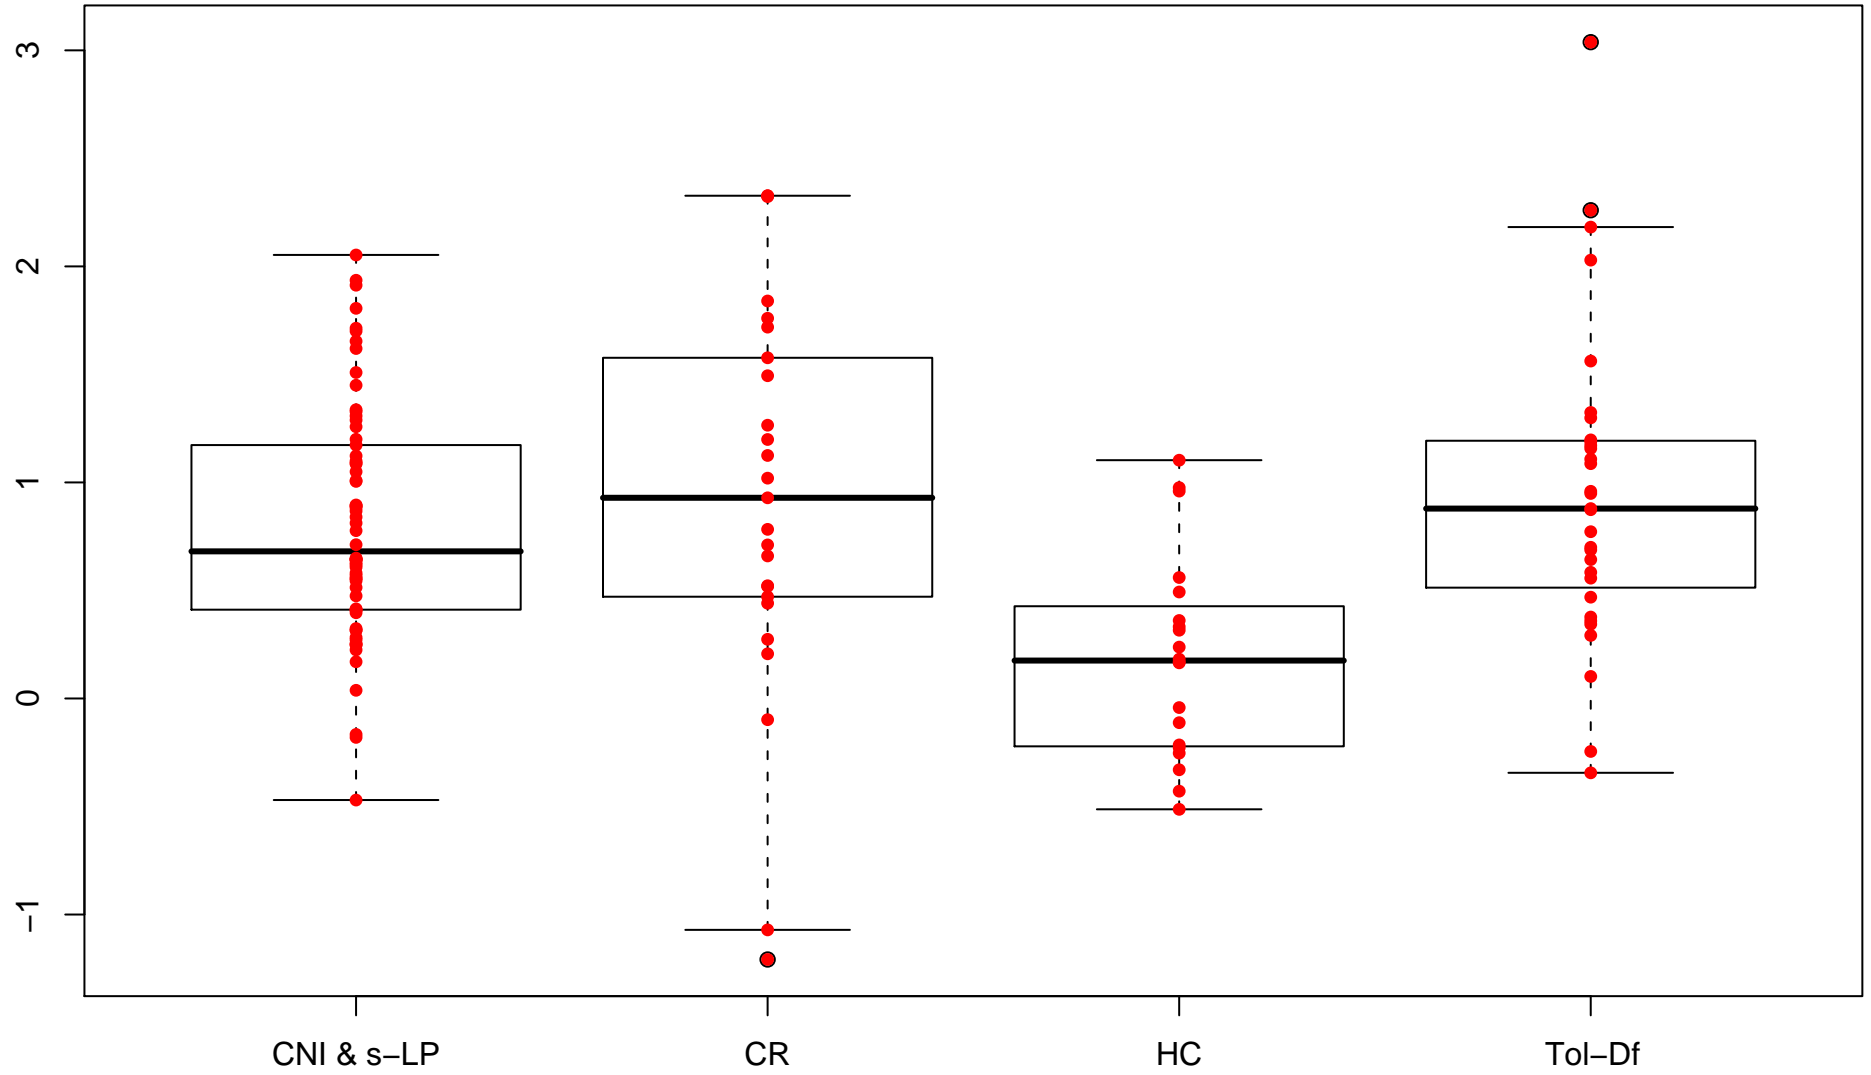

Rank 395 : STAT4  
9.897e-05

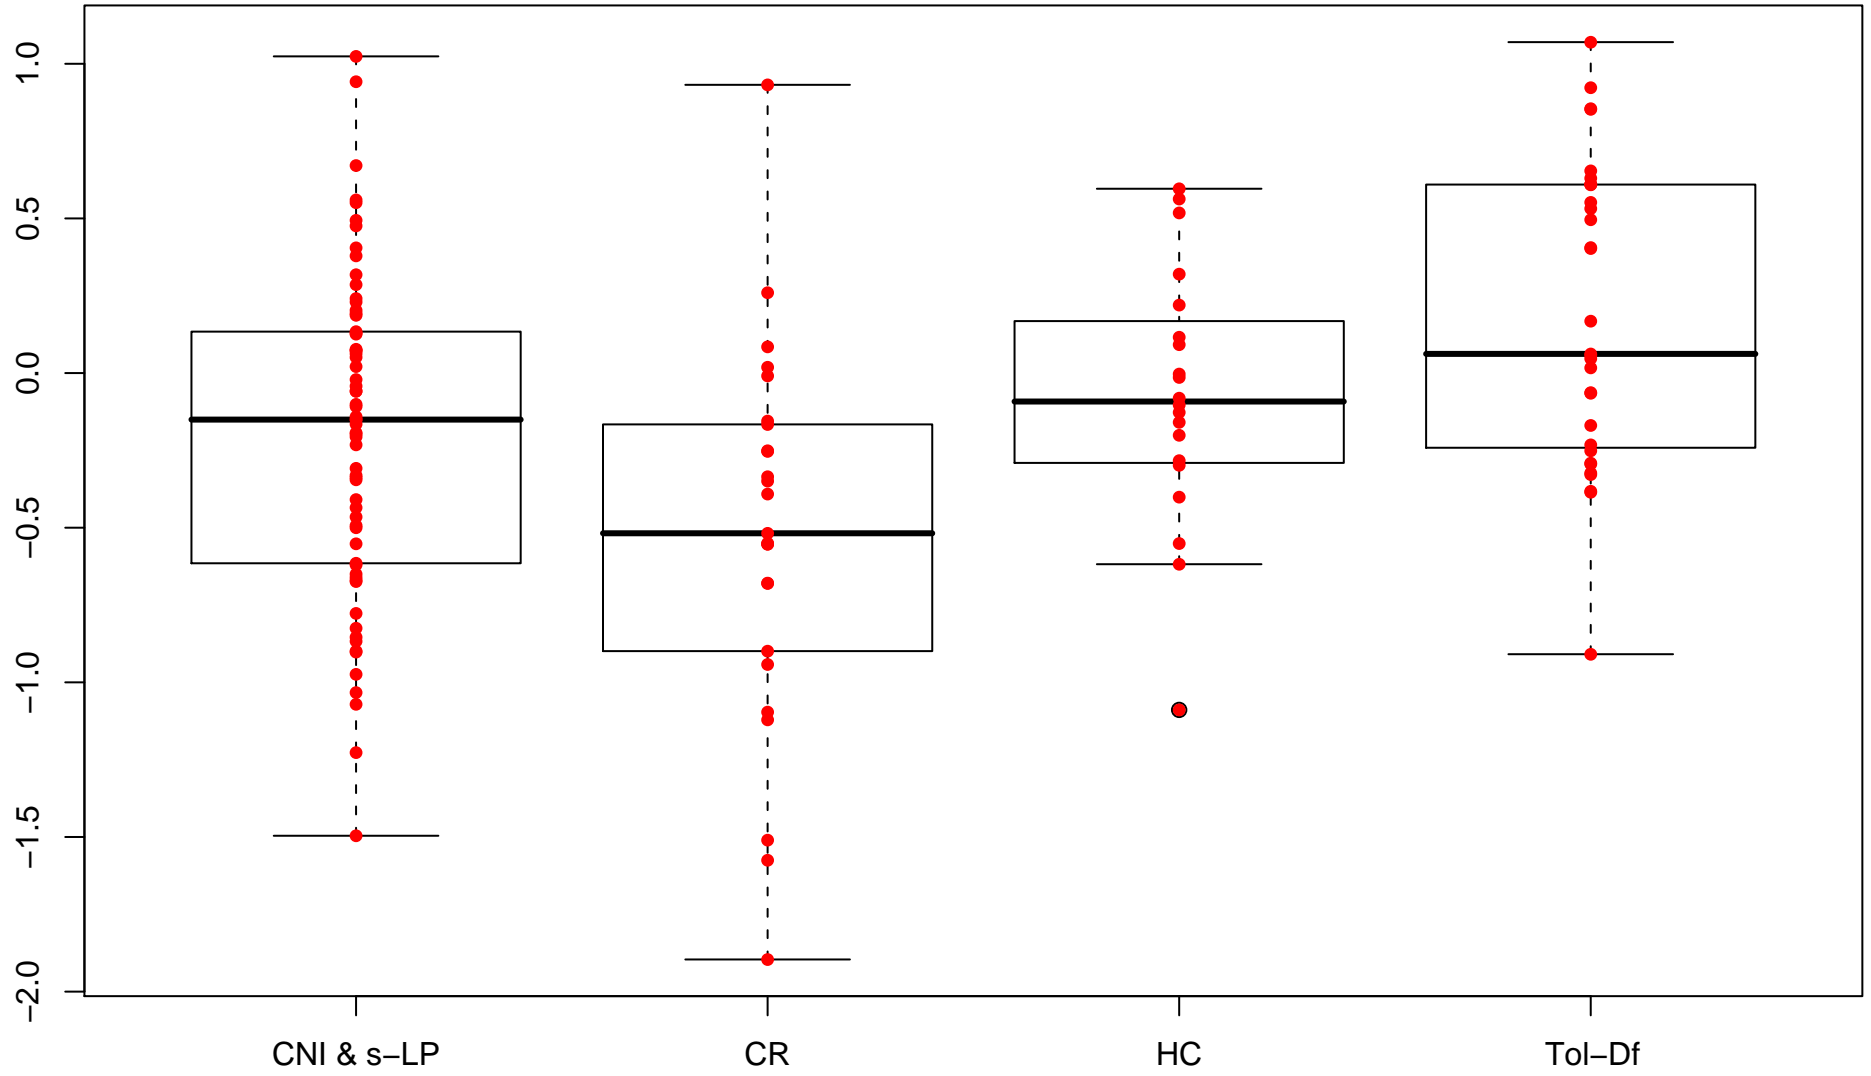

Rank 396 : FAT  
0.00010247

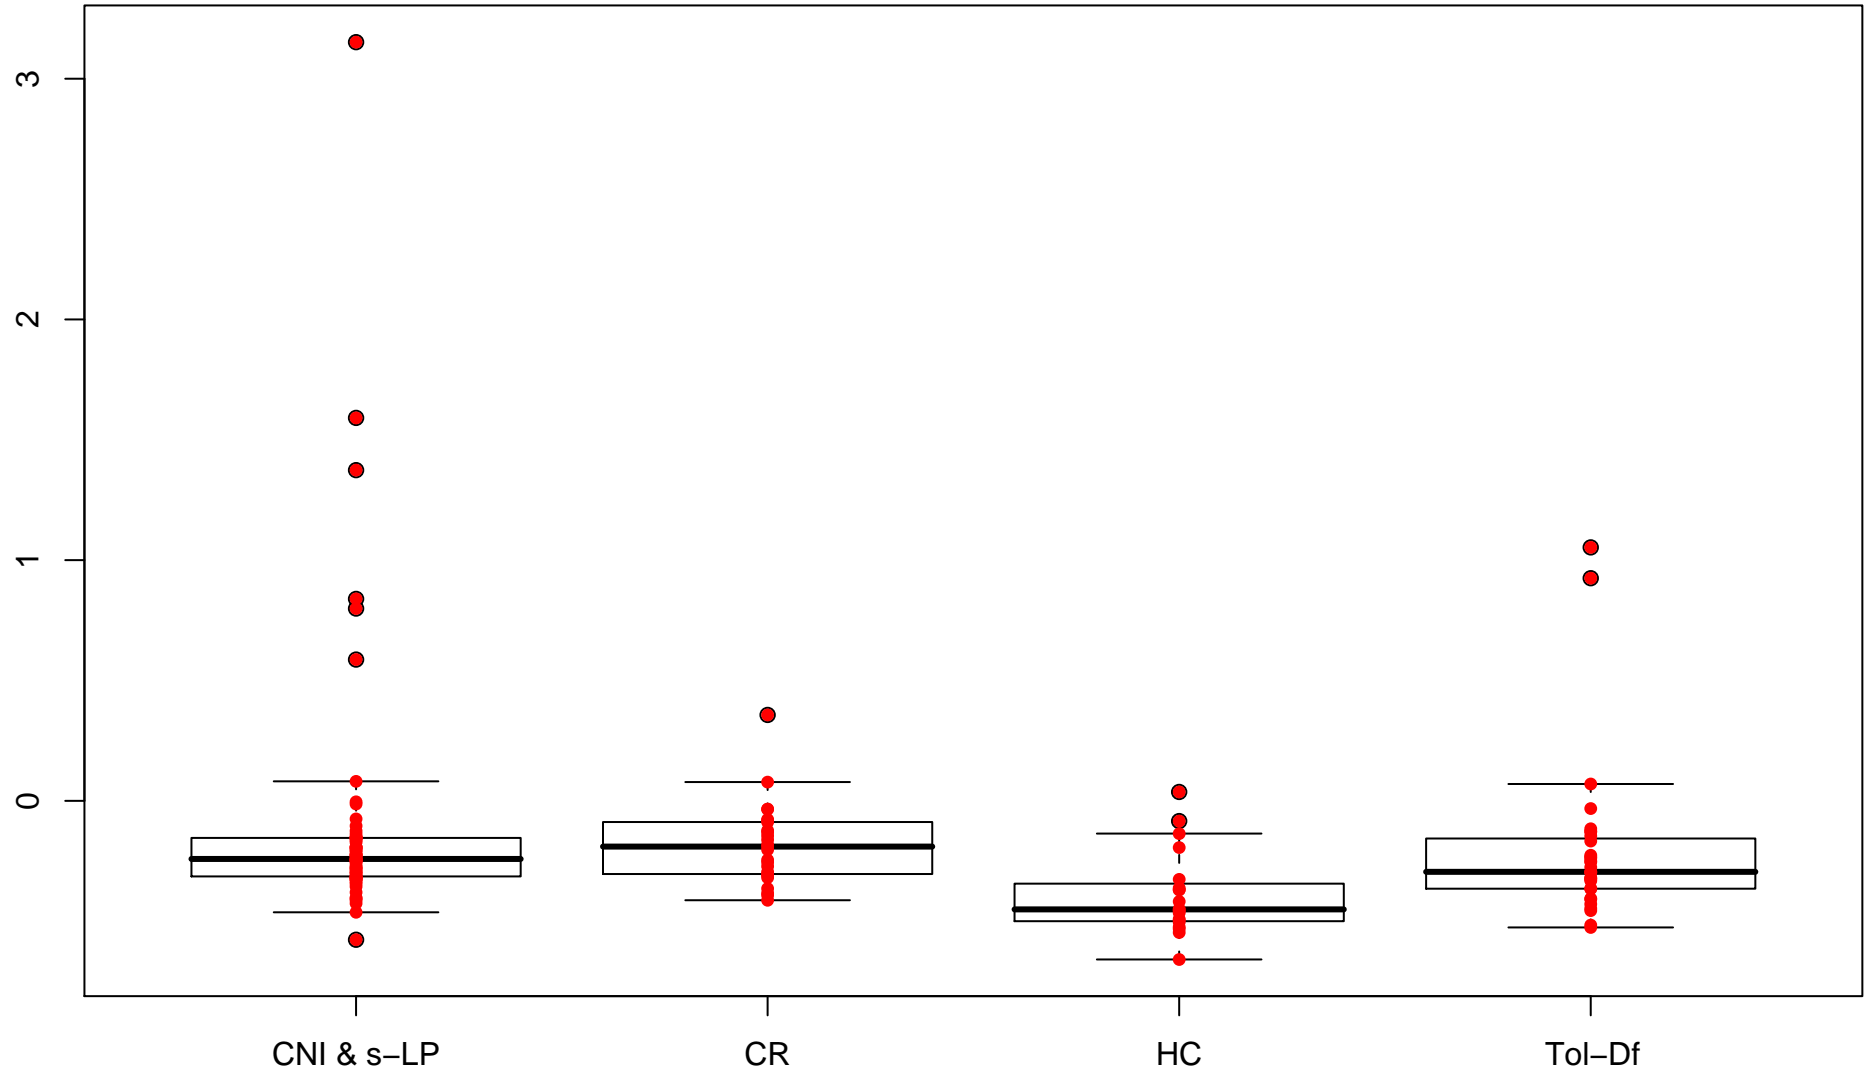

Rank 397 : ZNF264  
0.00010373

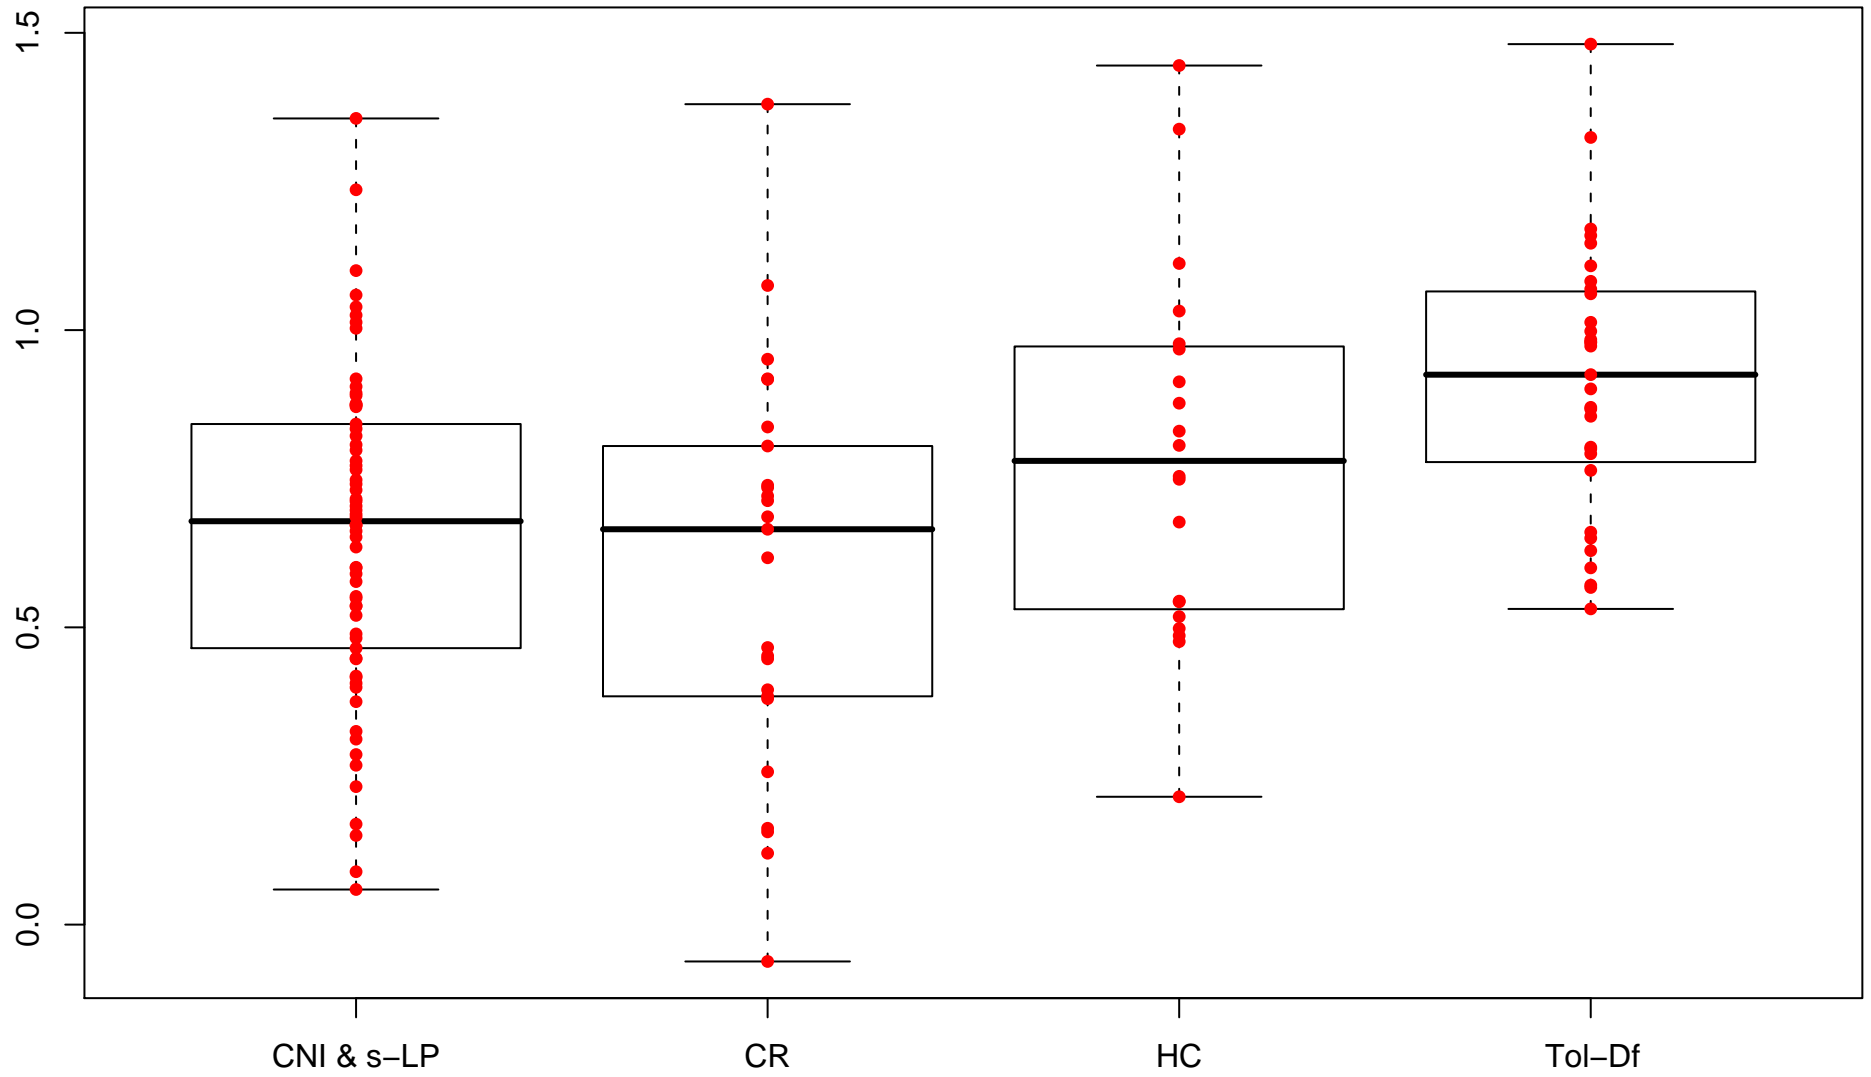

Rank 398 : PILRB  
0.000104

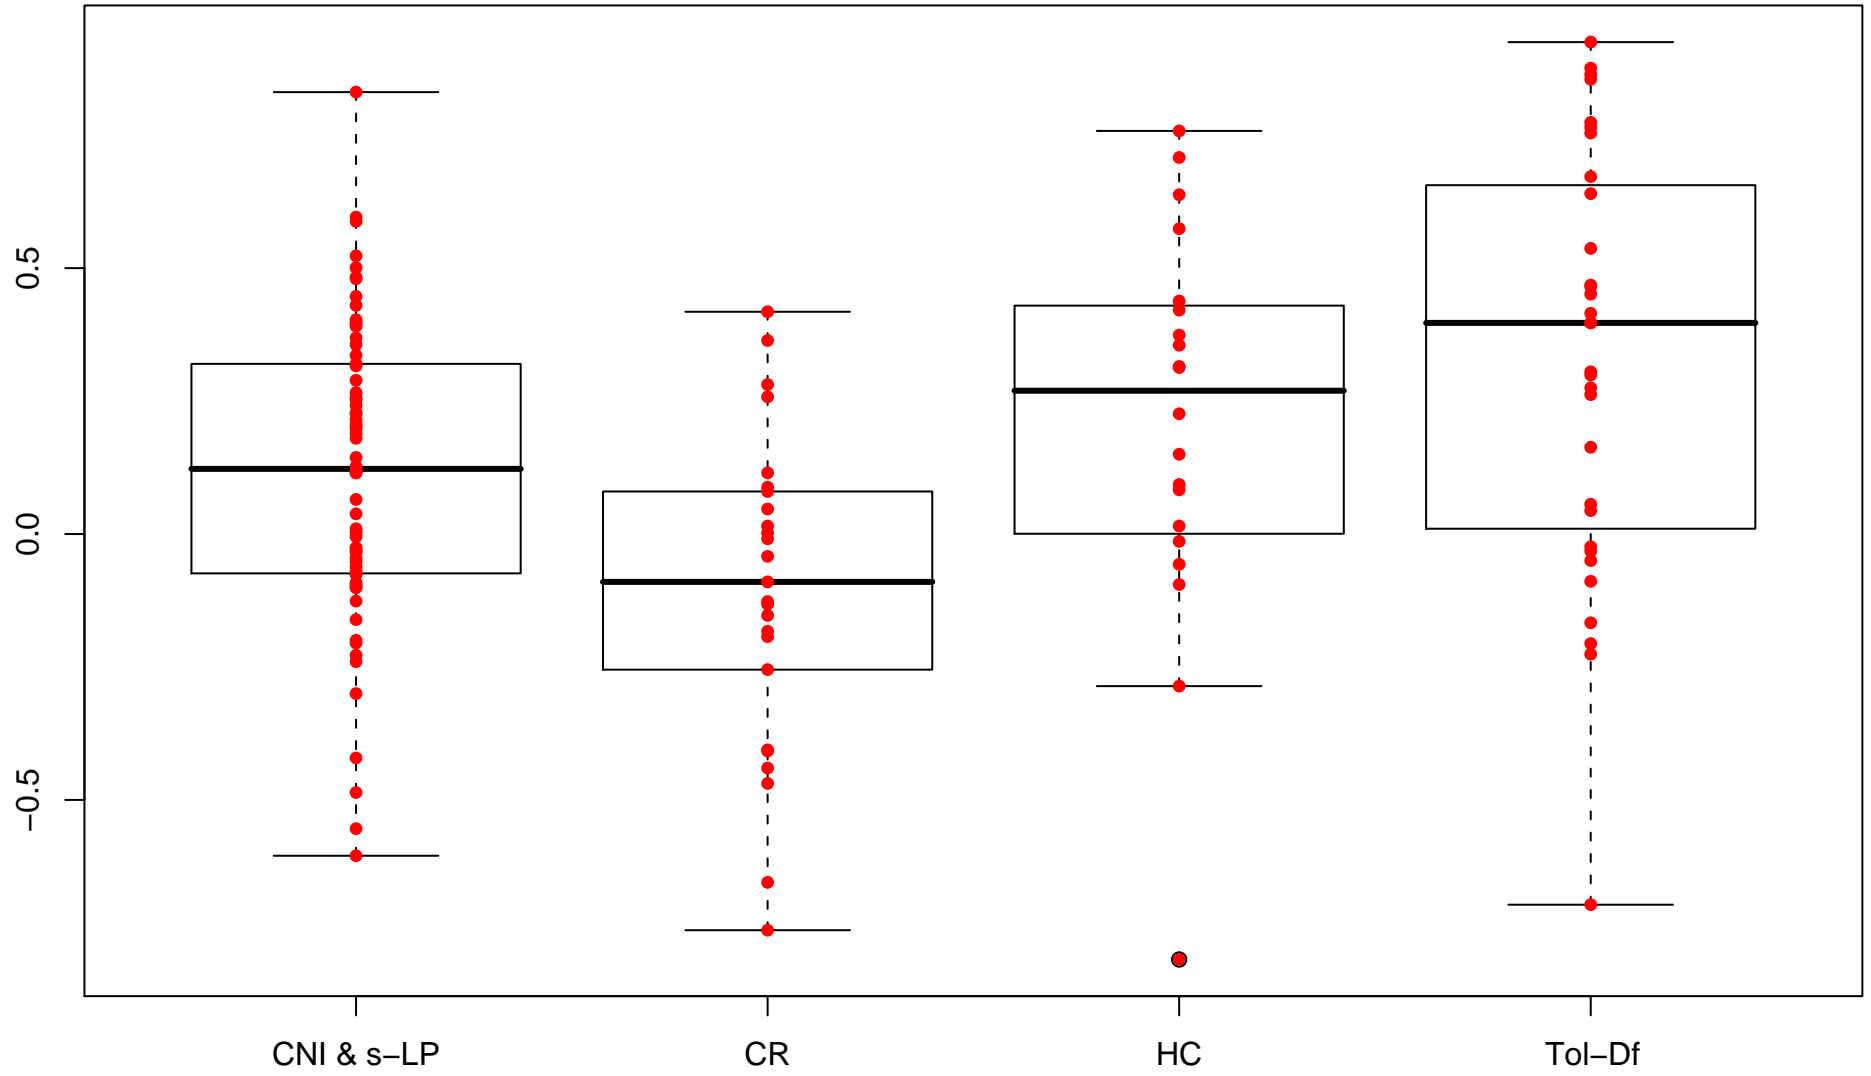

Rank 399 : EVI2B  
0.00010402

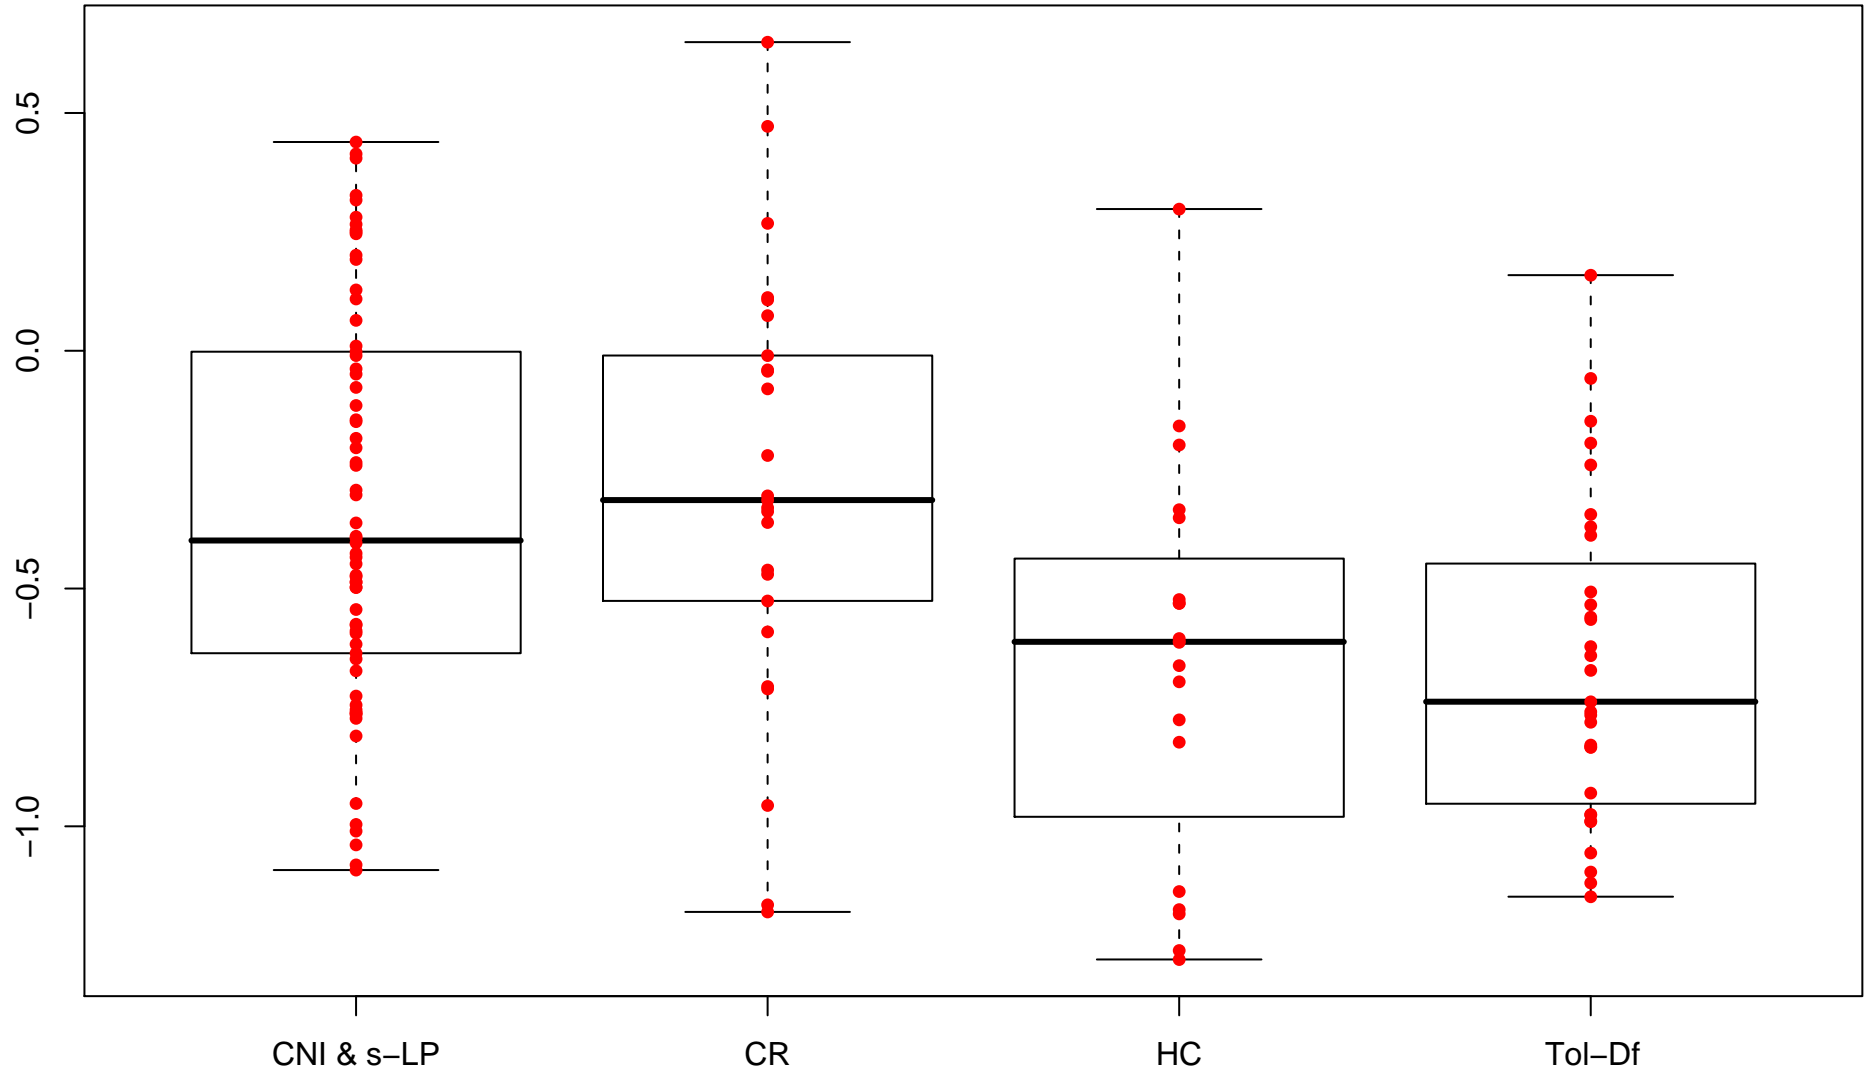



Rank 400 : C5ORF28  
0.00010603

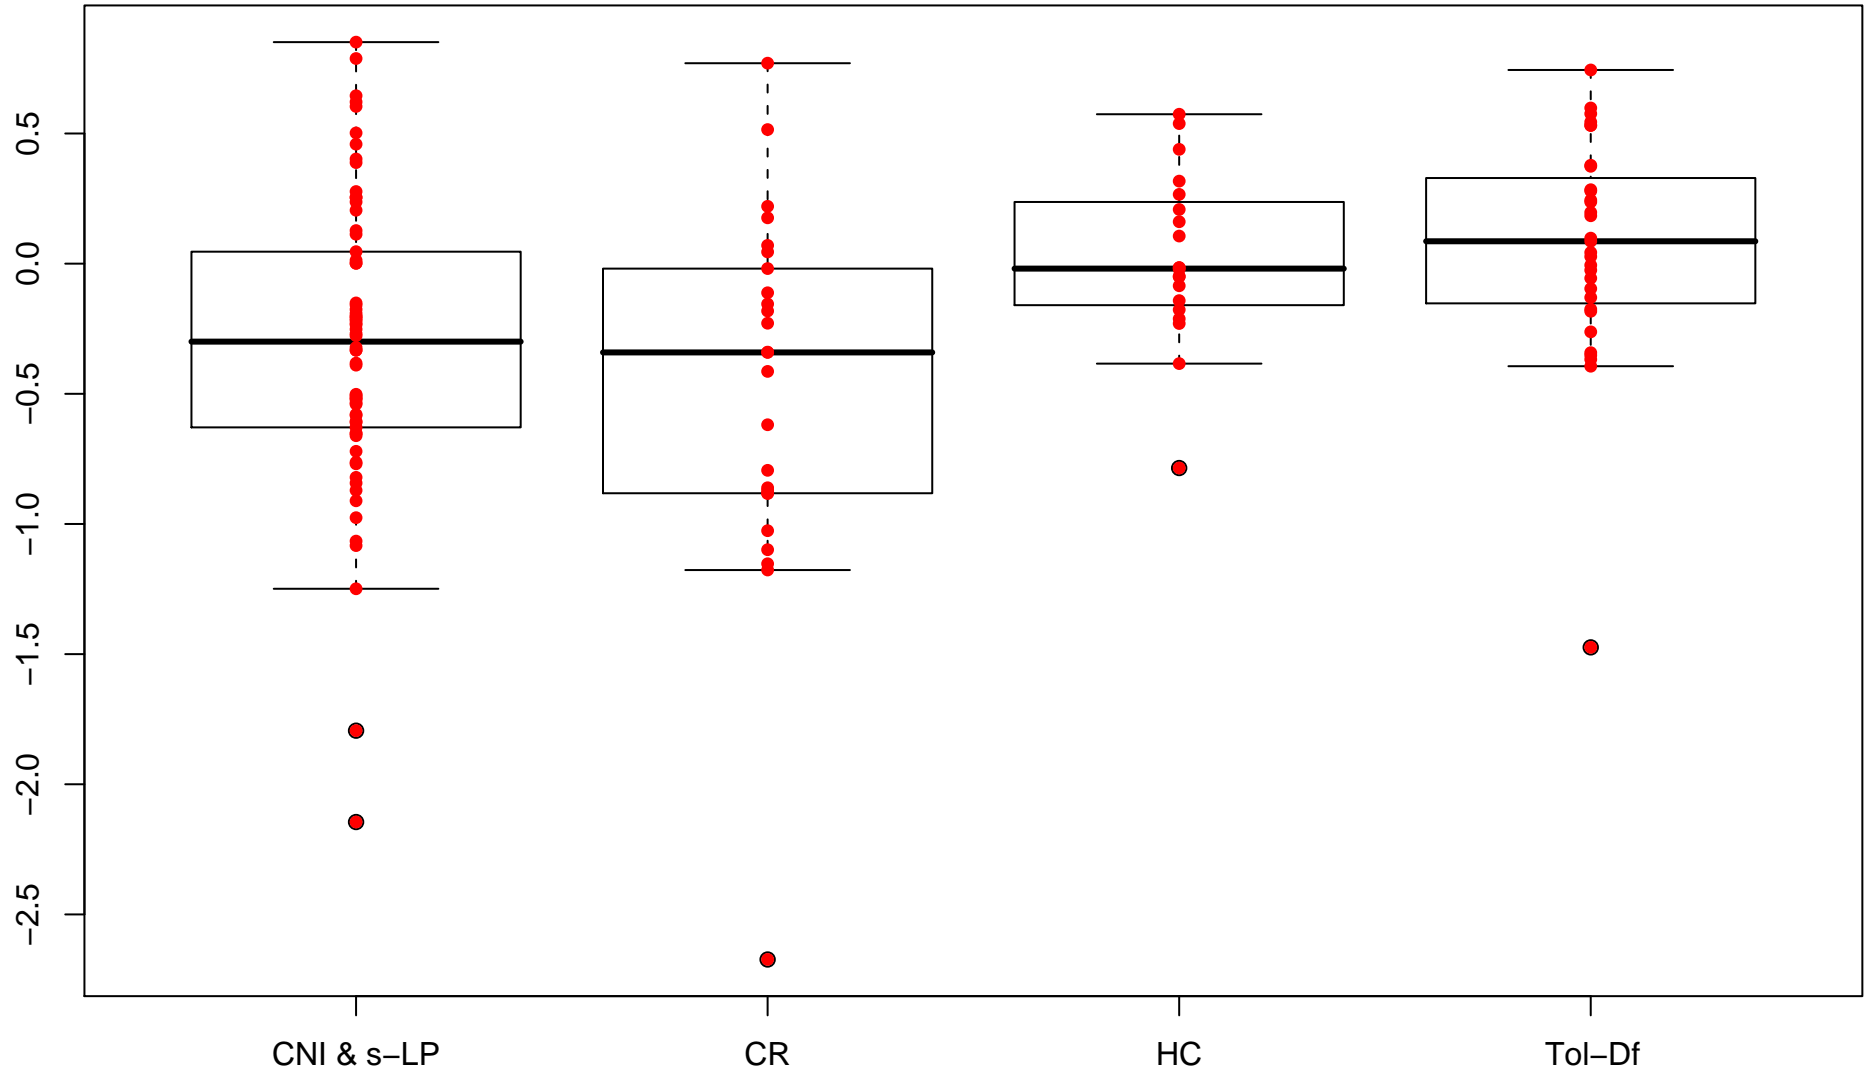

Rank 401 : A\_23\_P399604  
0.00010801

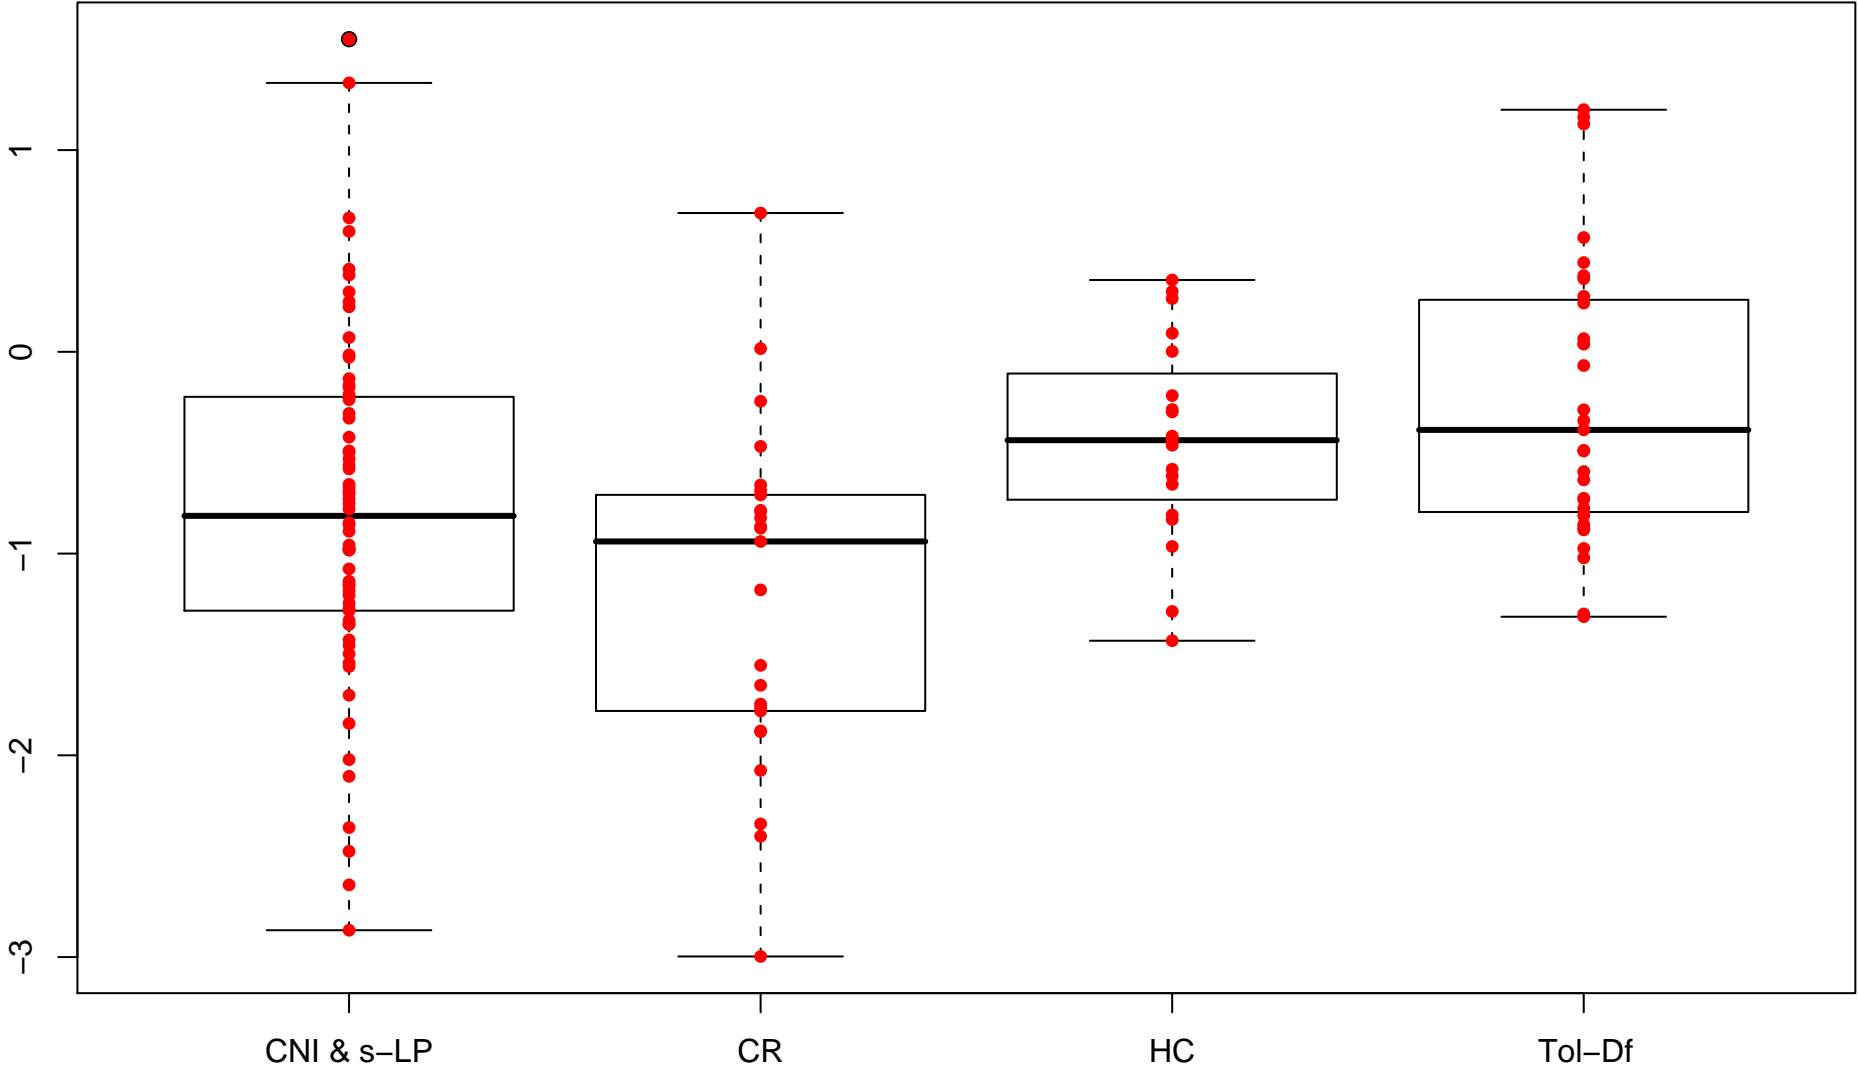

Rank 402 : FAM108A1;FAM108A2;FAM108A3  
0.00011106

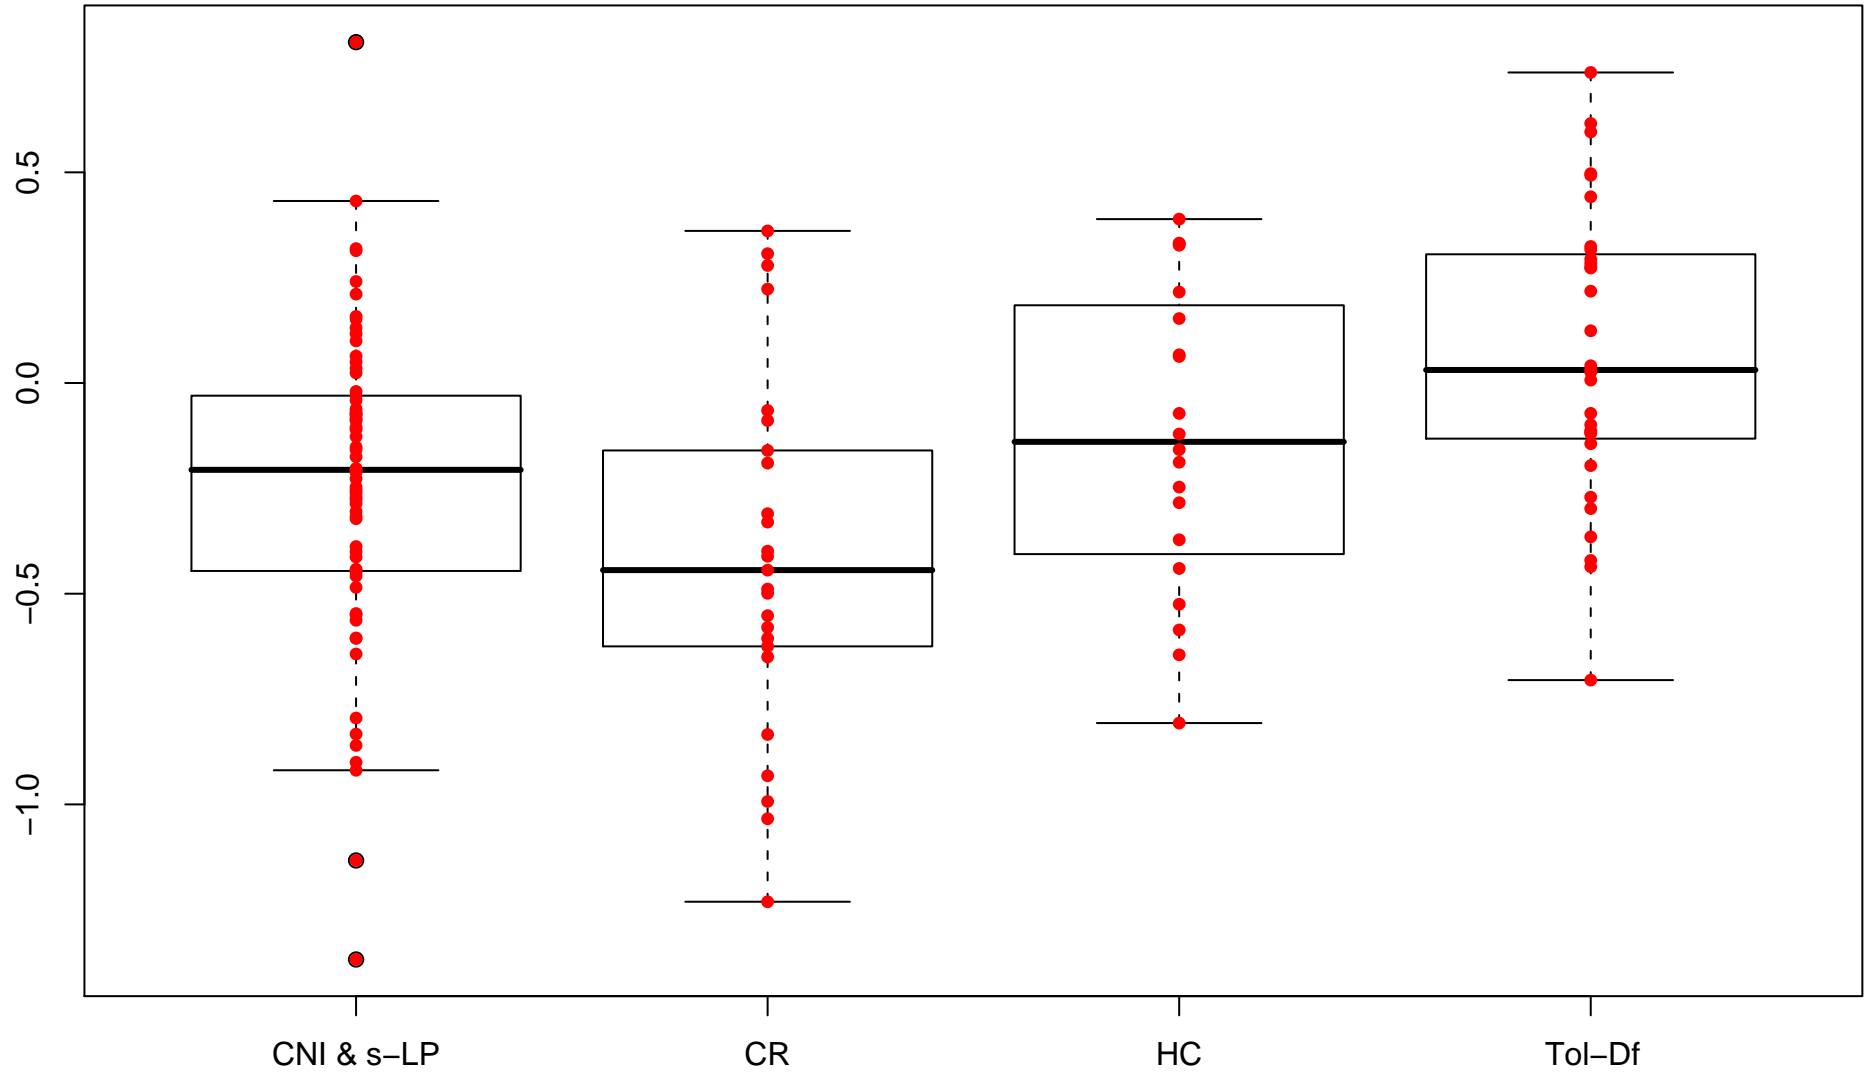

Rank 403 : RHOBTB3  
0.00011157

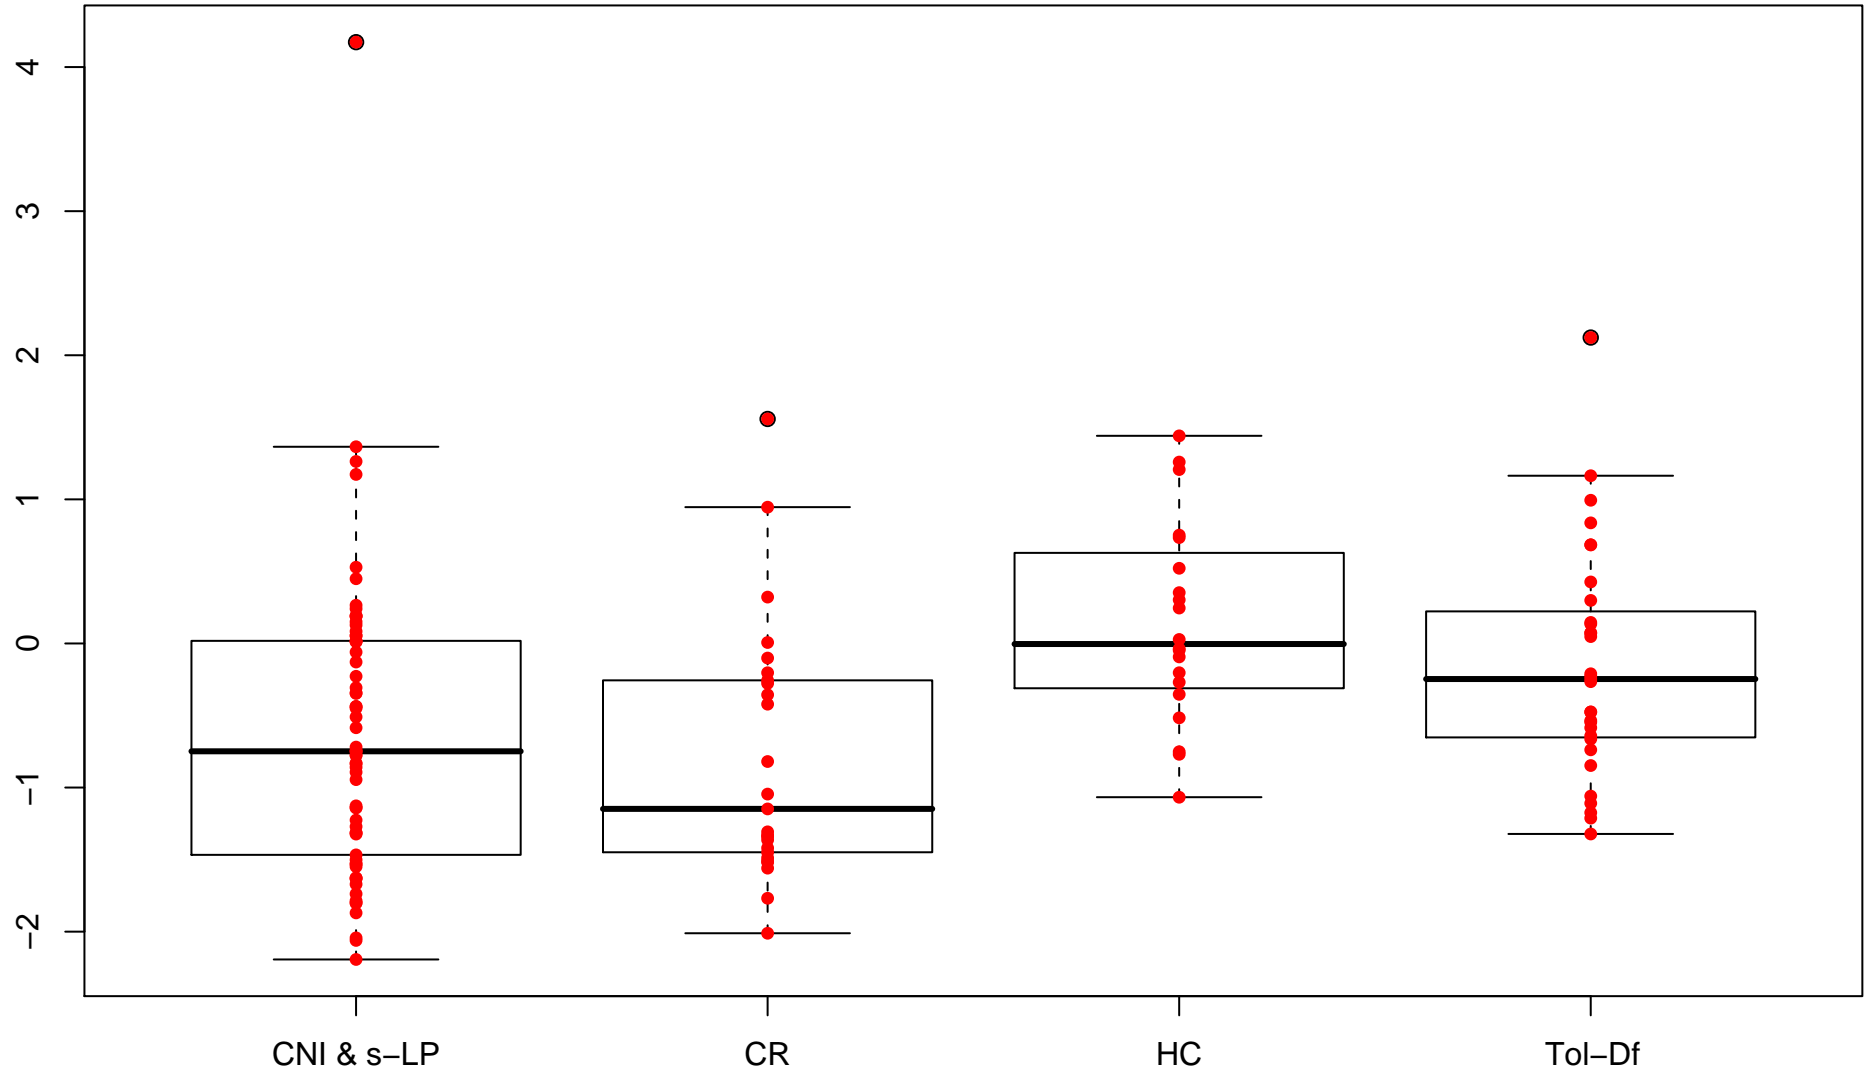

Rank 404 : PLCG1  
0.0001268

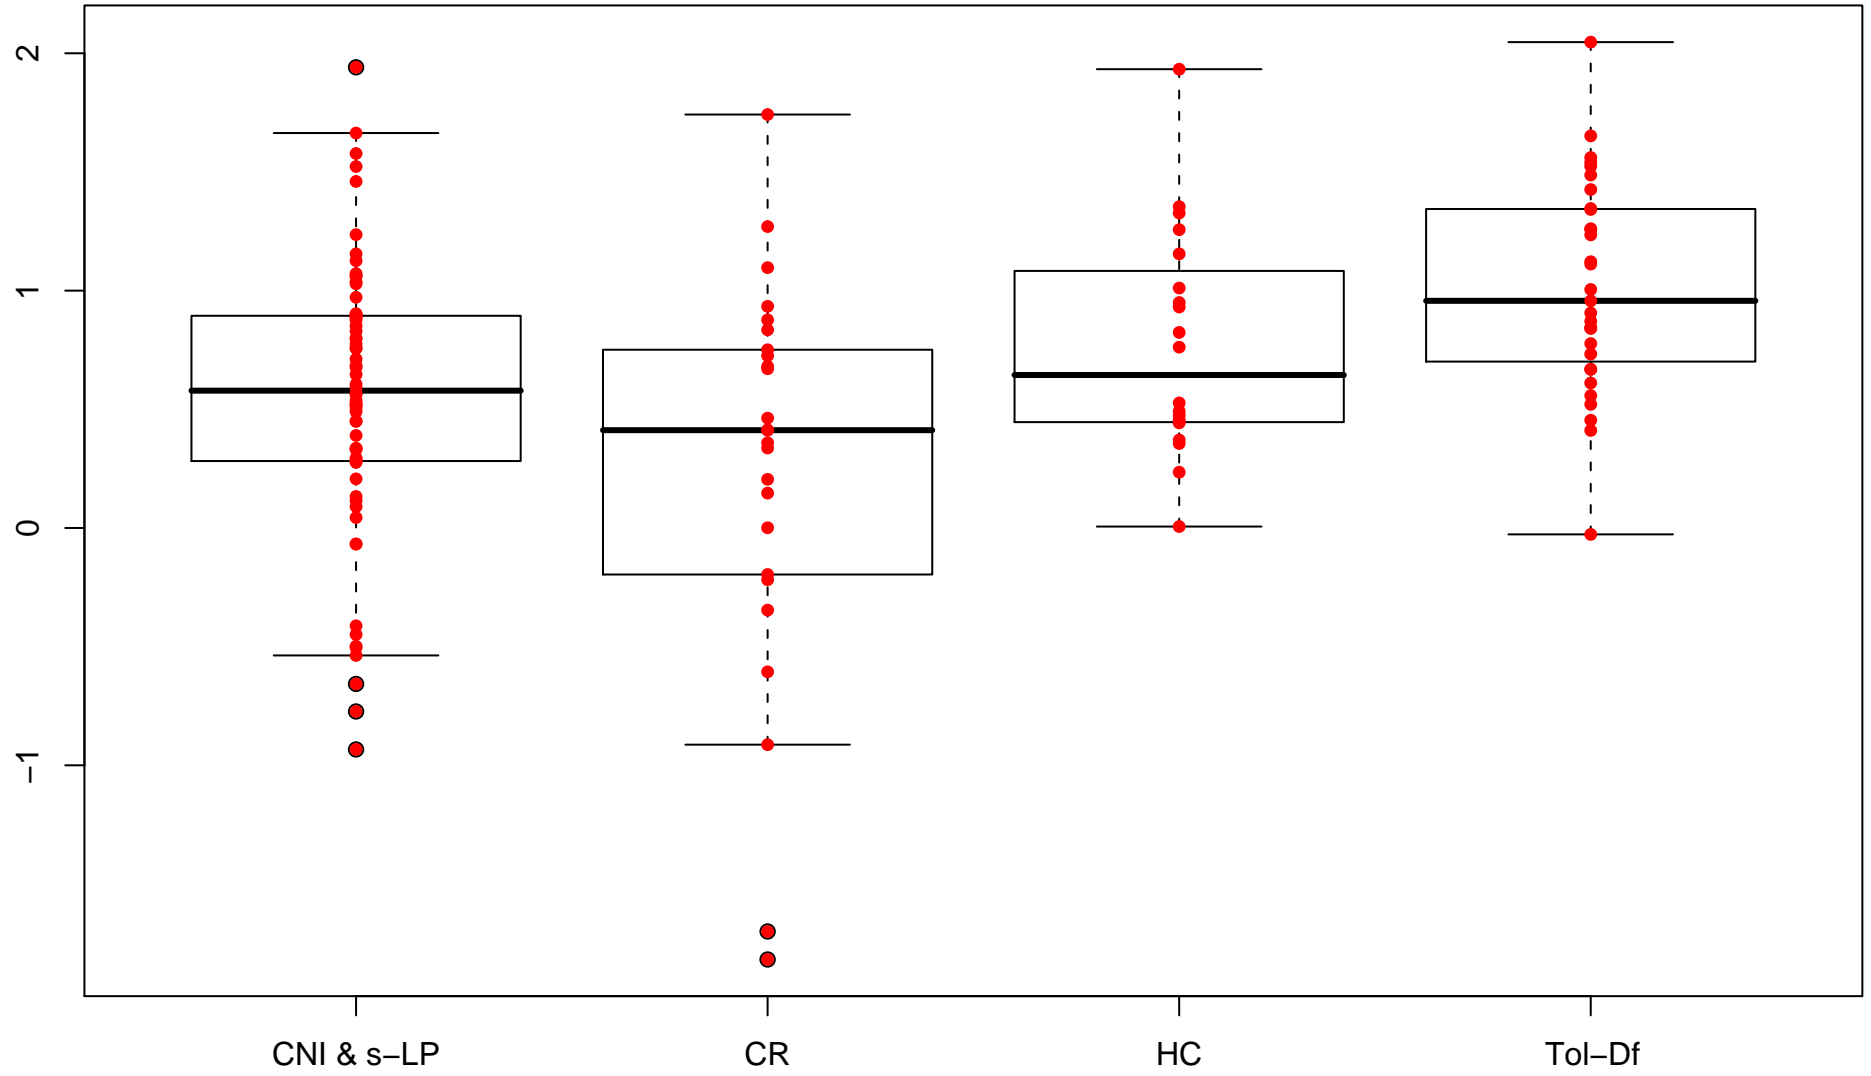

Rank 405 : SLC7A8  
0.00011411

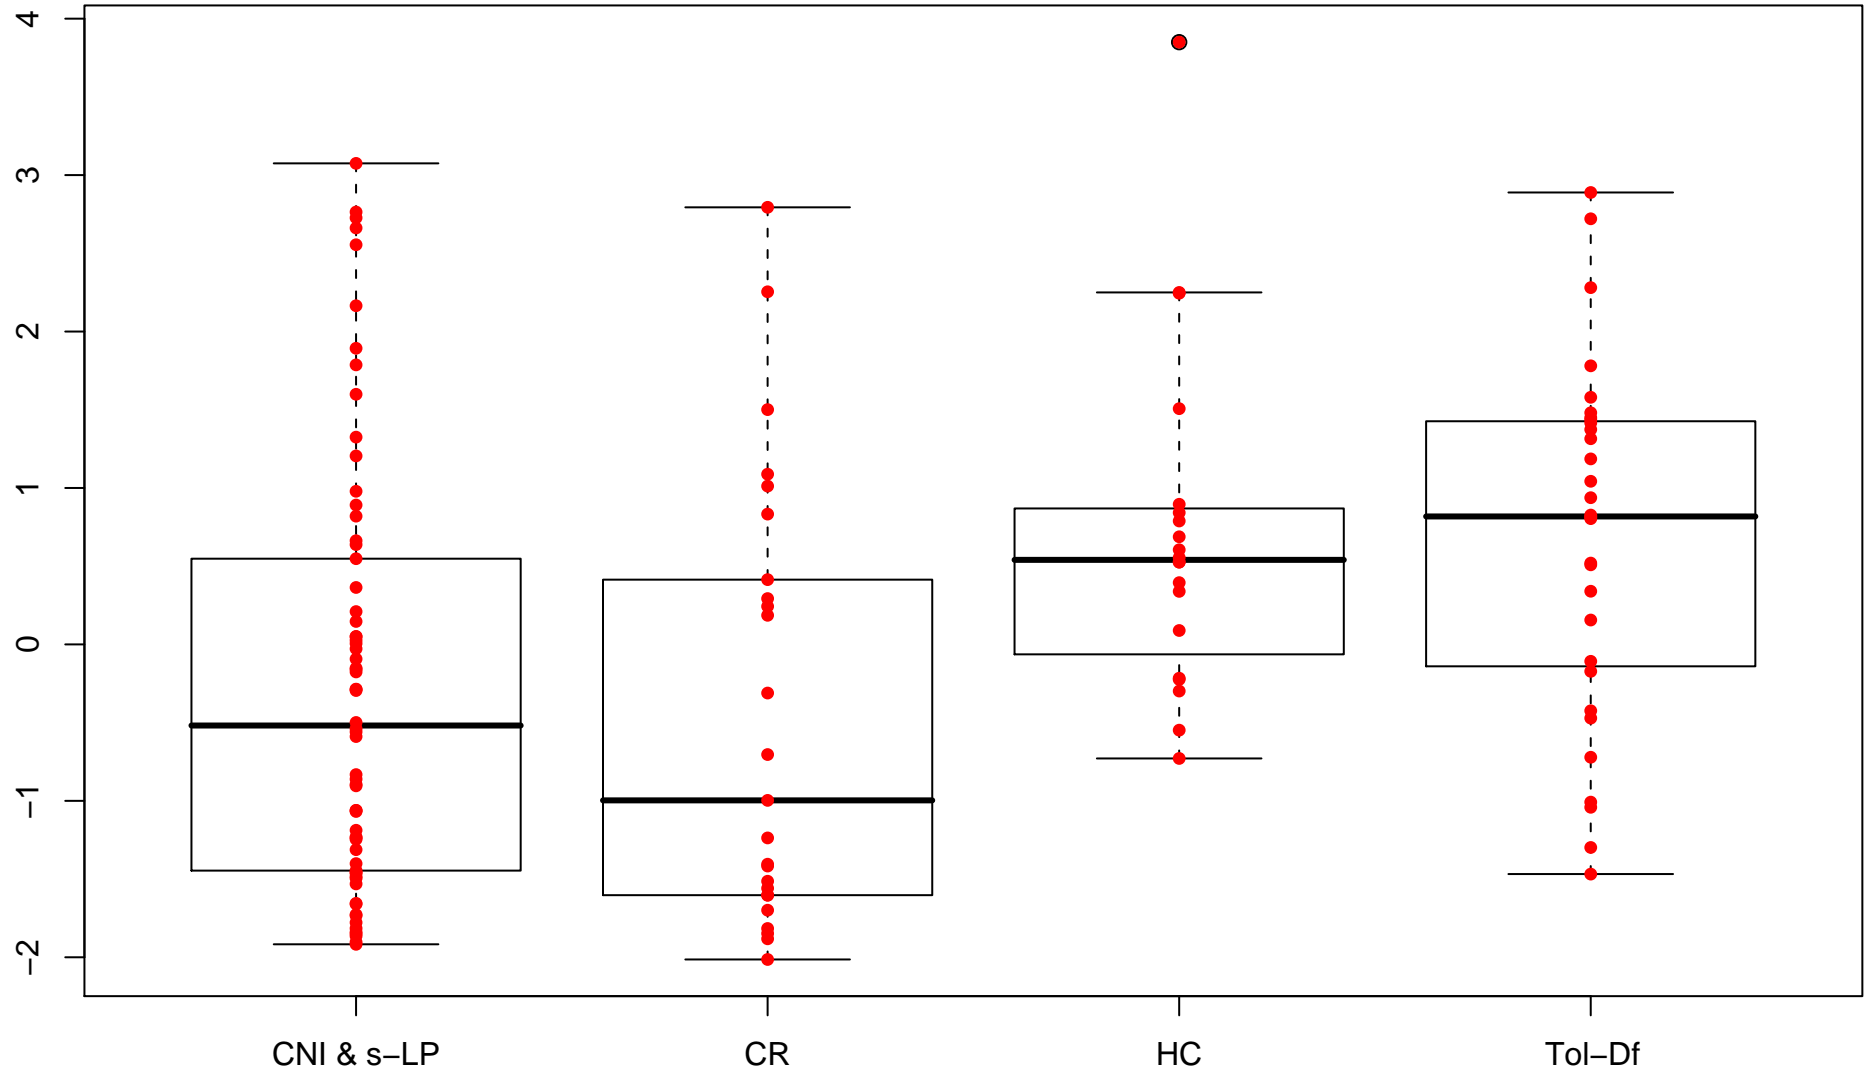

Rank 406 : PPARA  
0.00011429

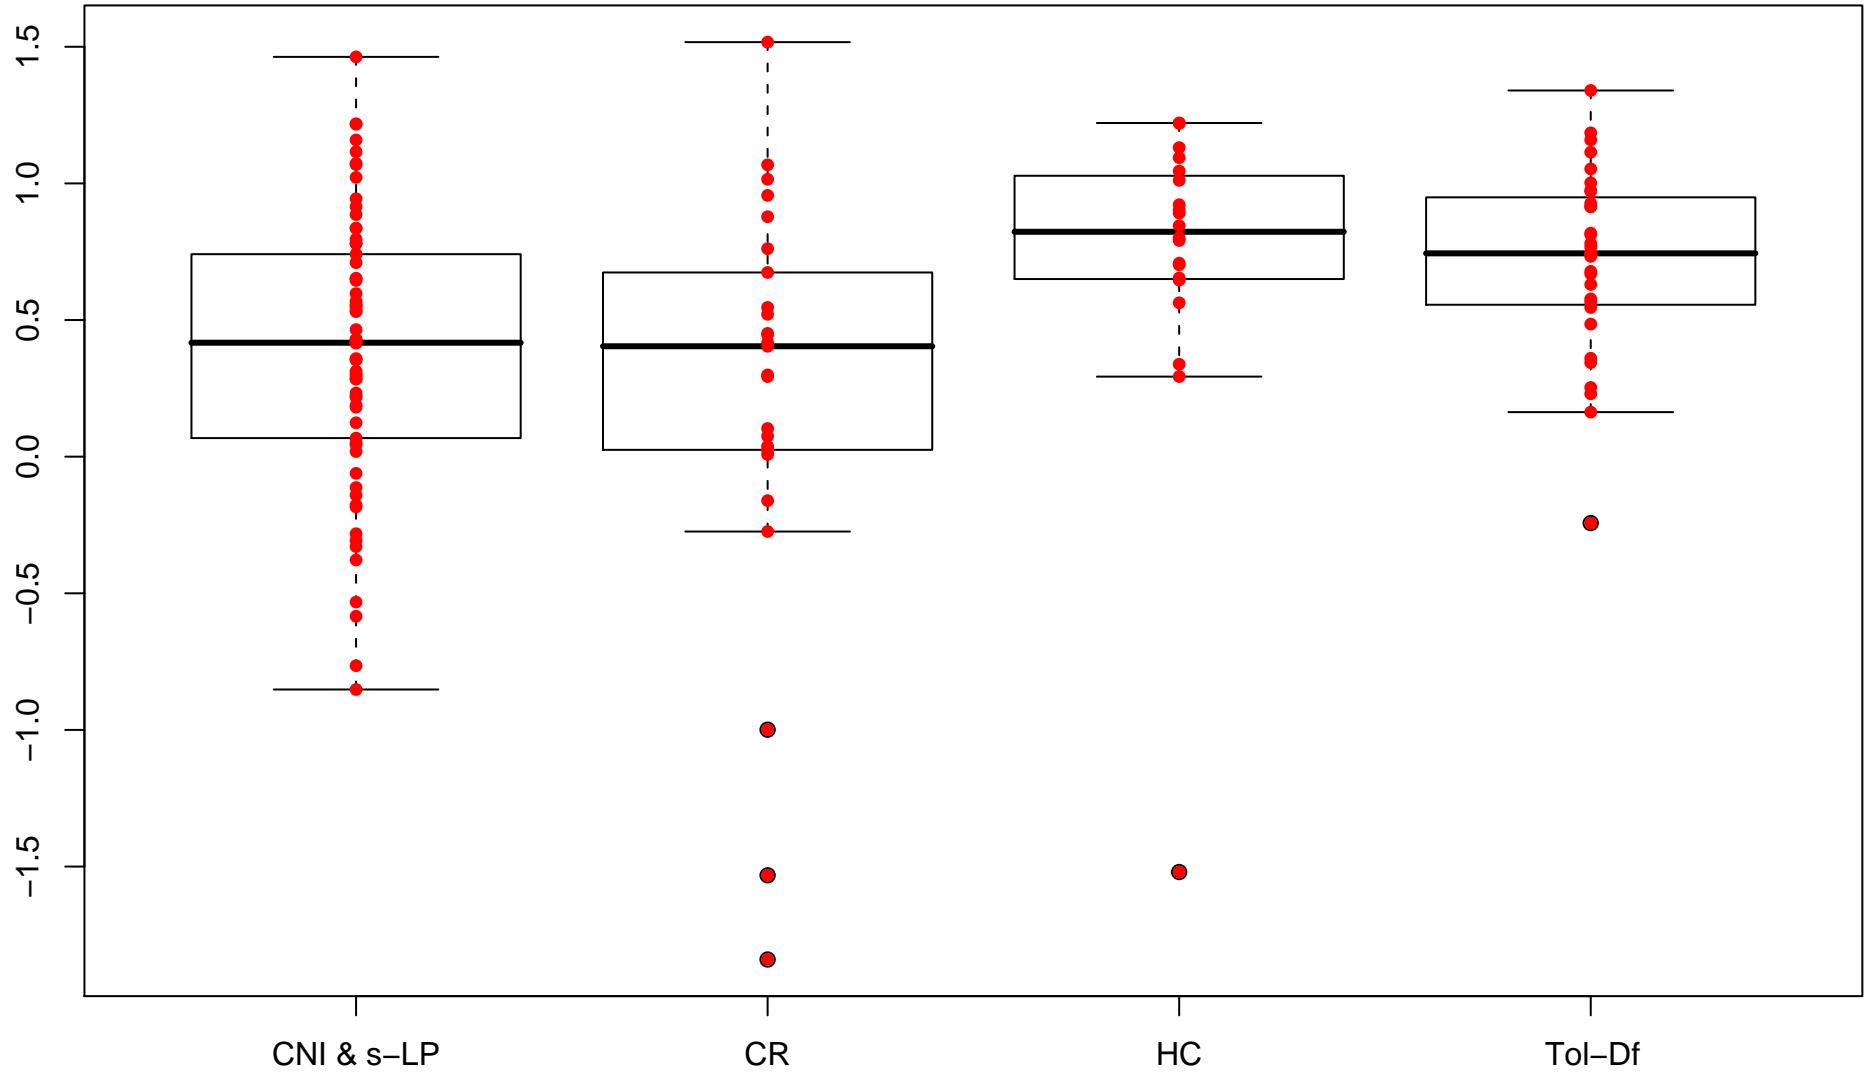

Rank 407 : PBX1  
0.00011538

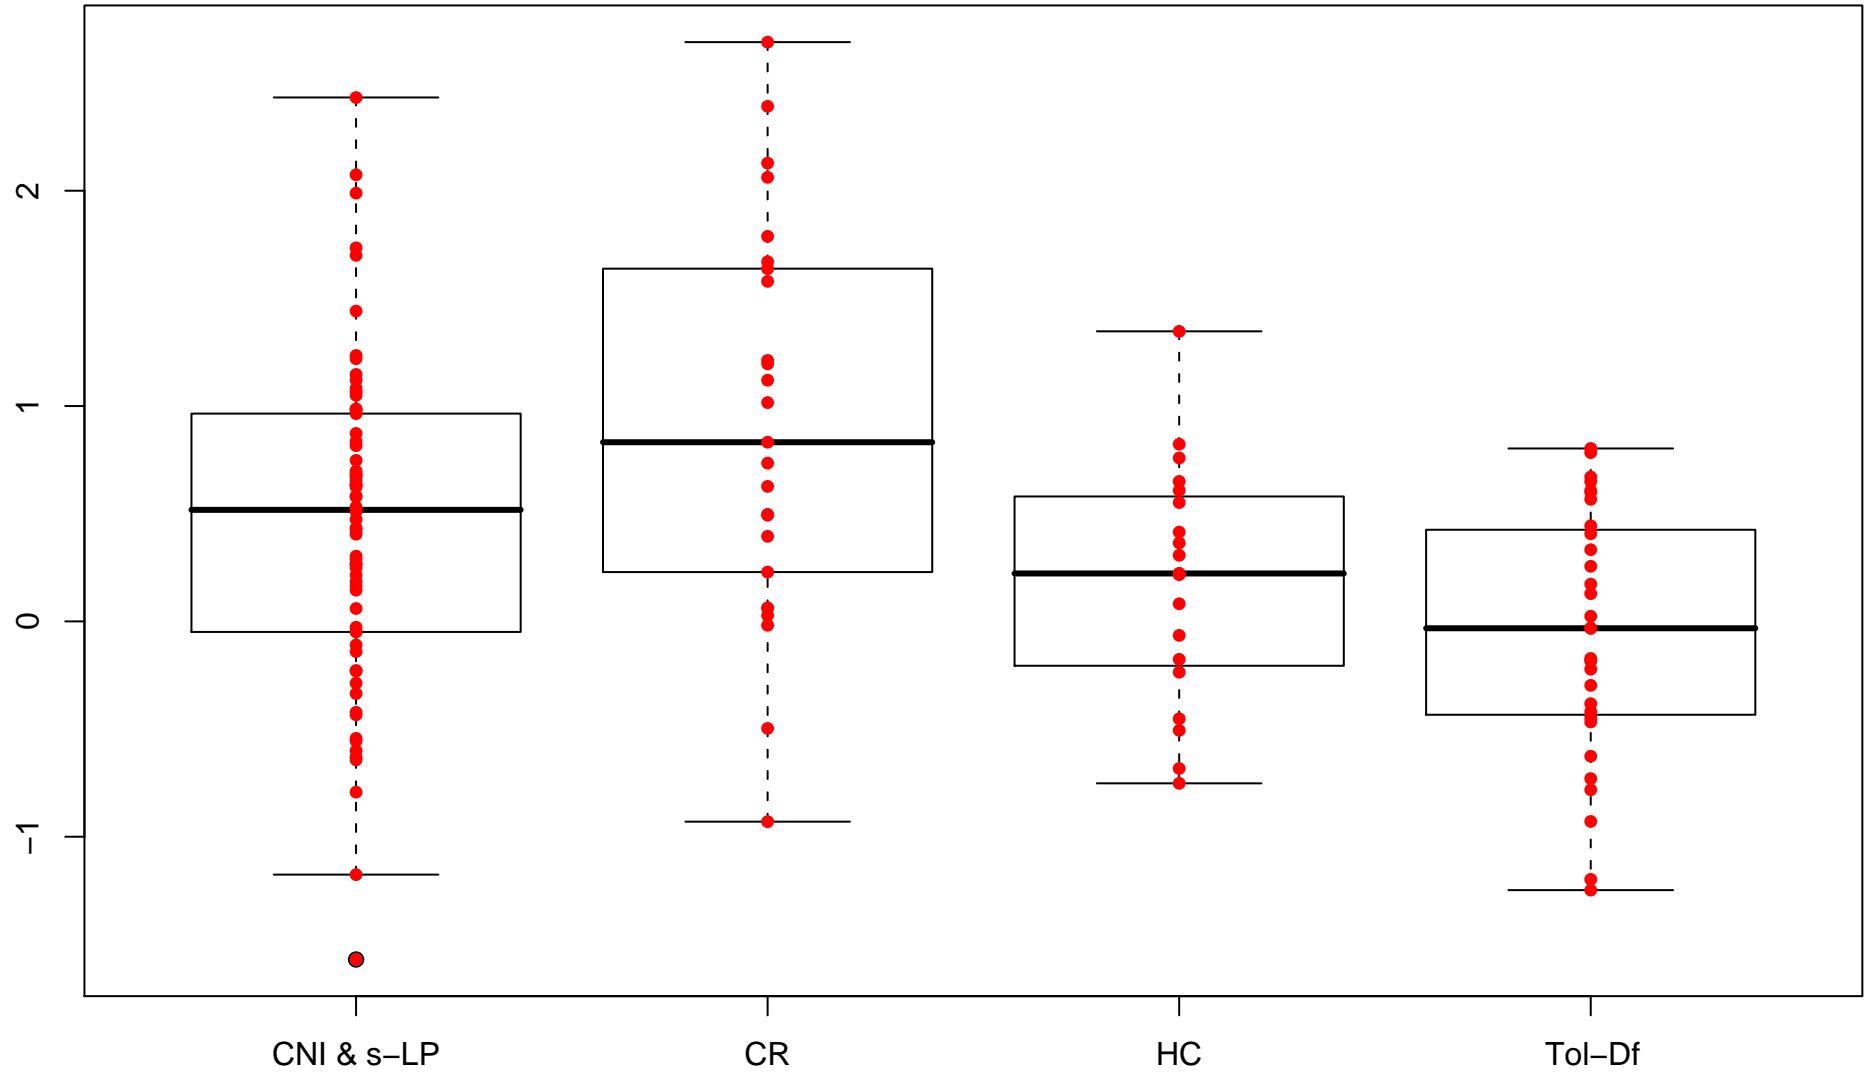



Rank 408 : RPS27L  
0.00011614

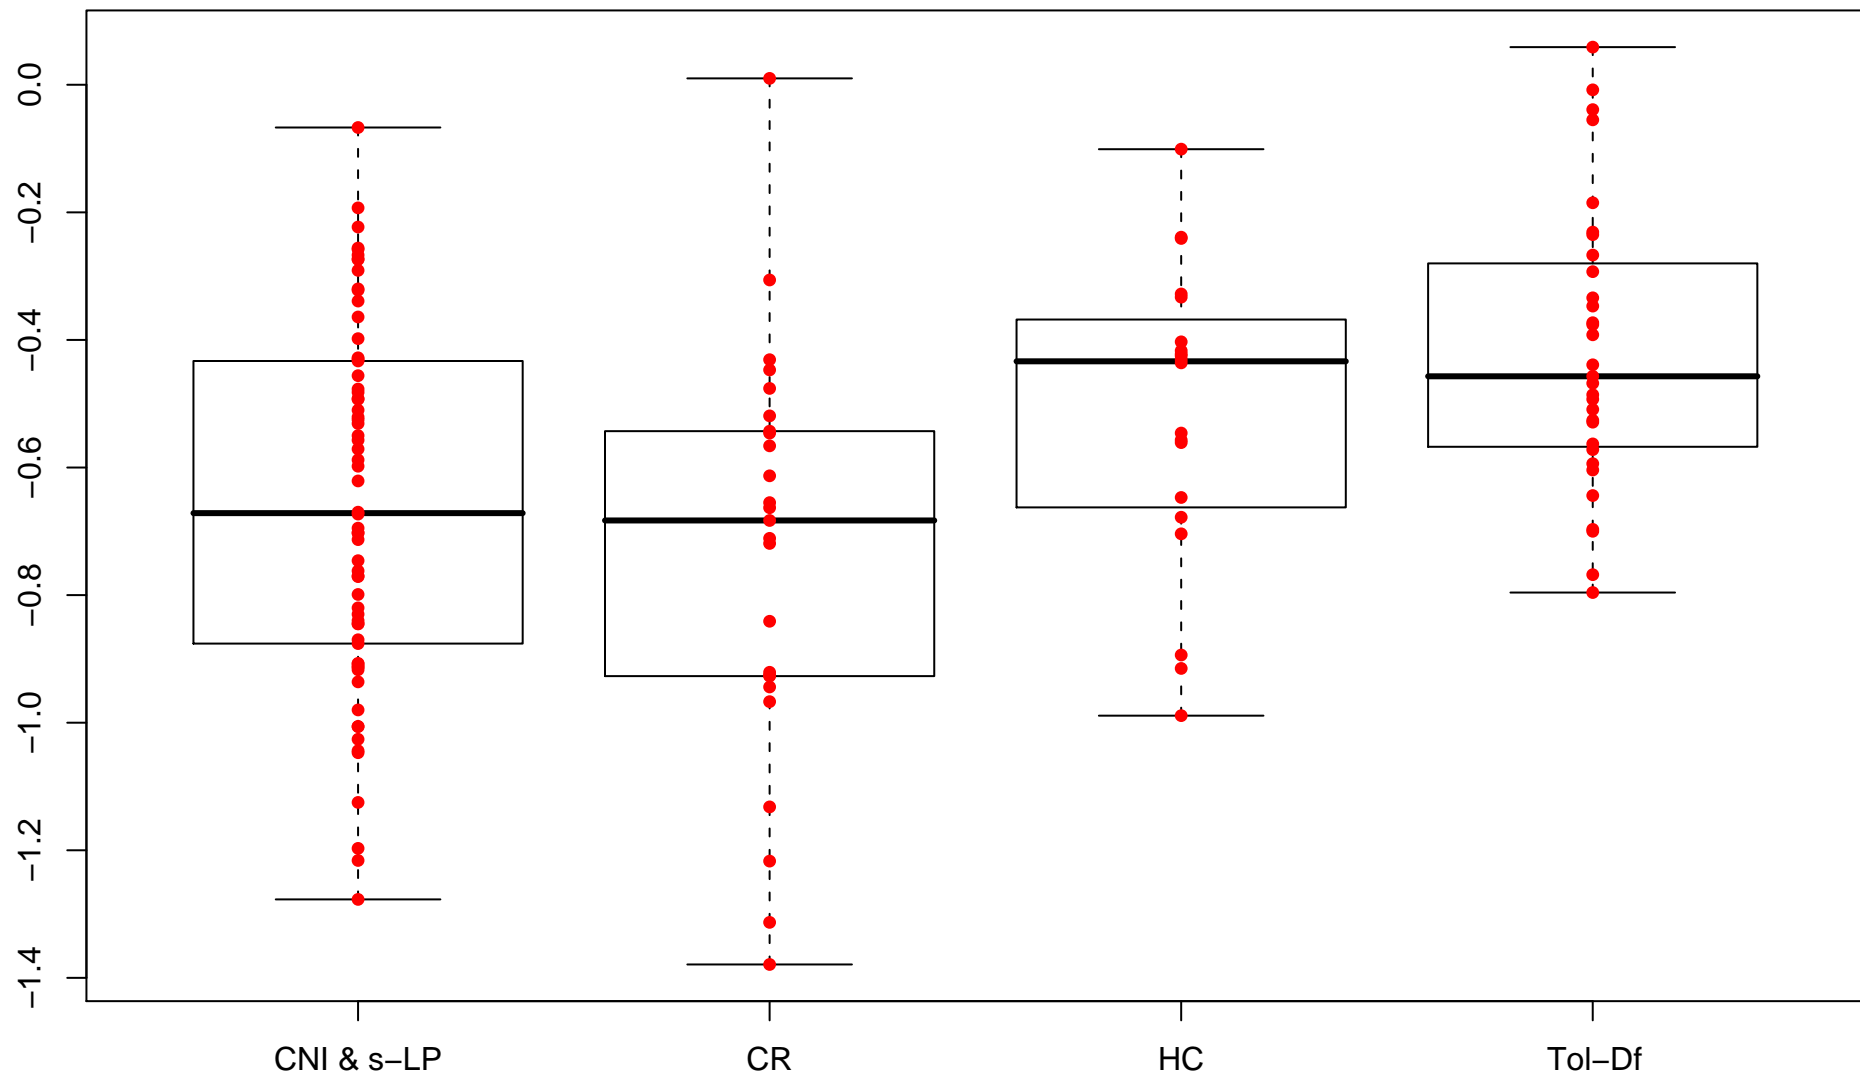

Rank 409 : C8ORF60  
0.00011894

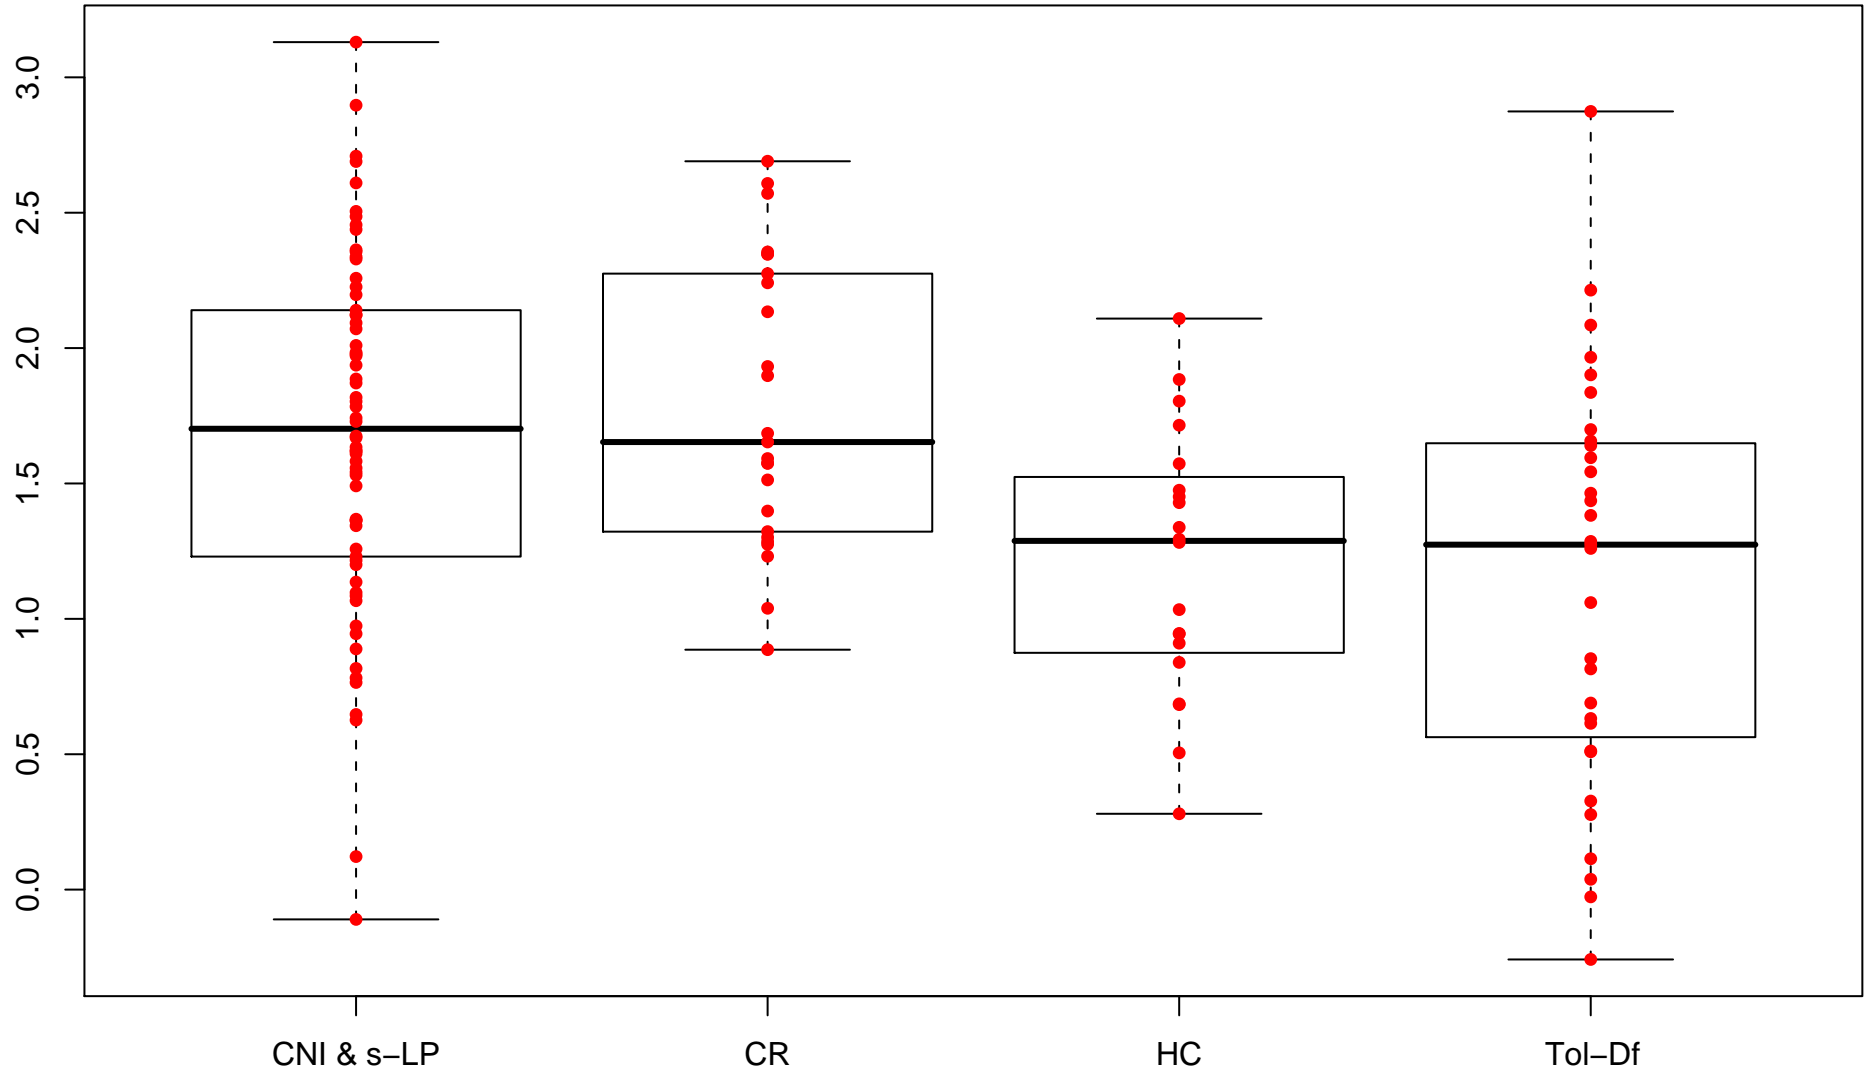

Rank 410 : OLAH  
0.00011976

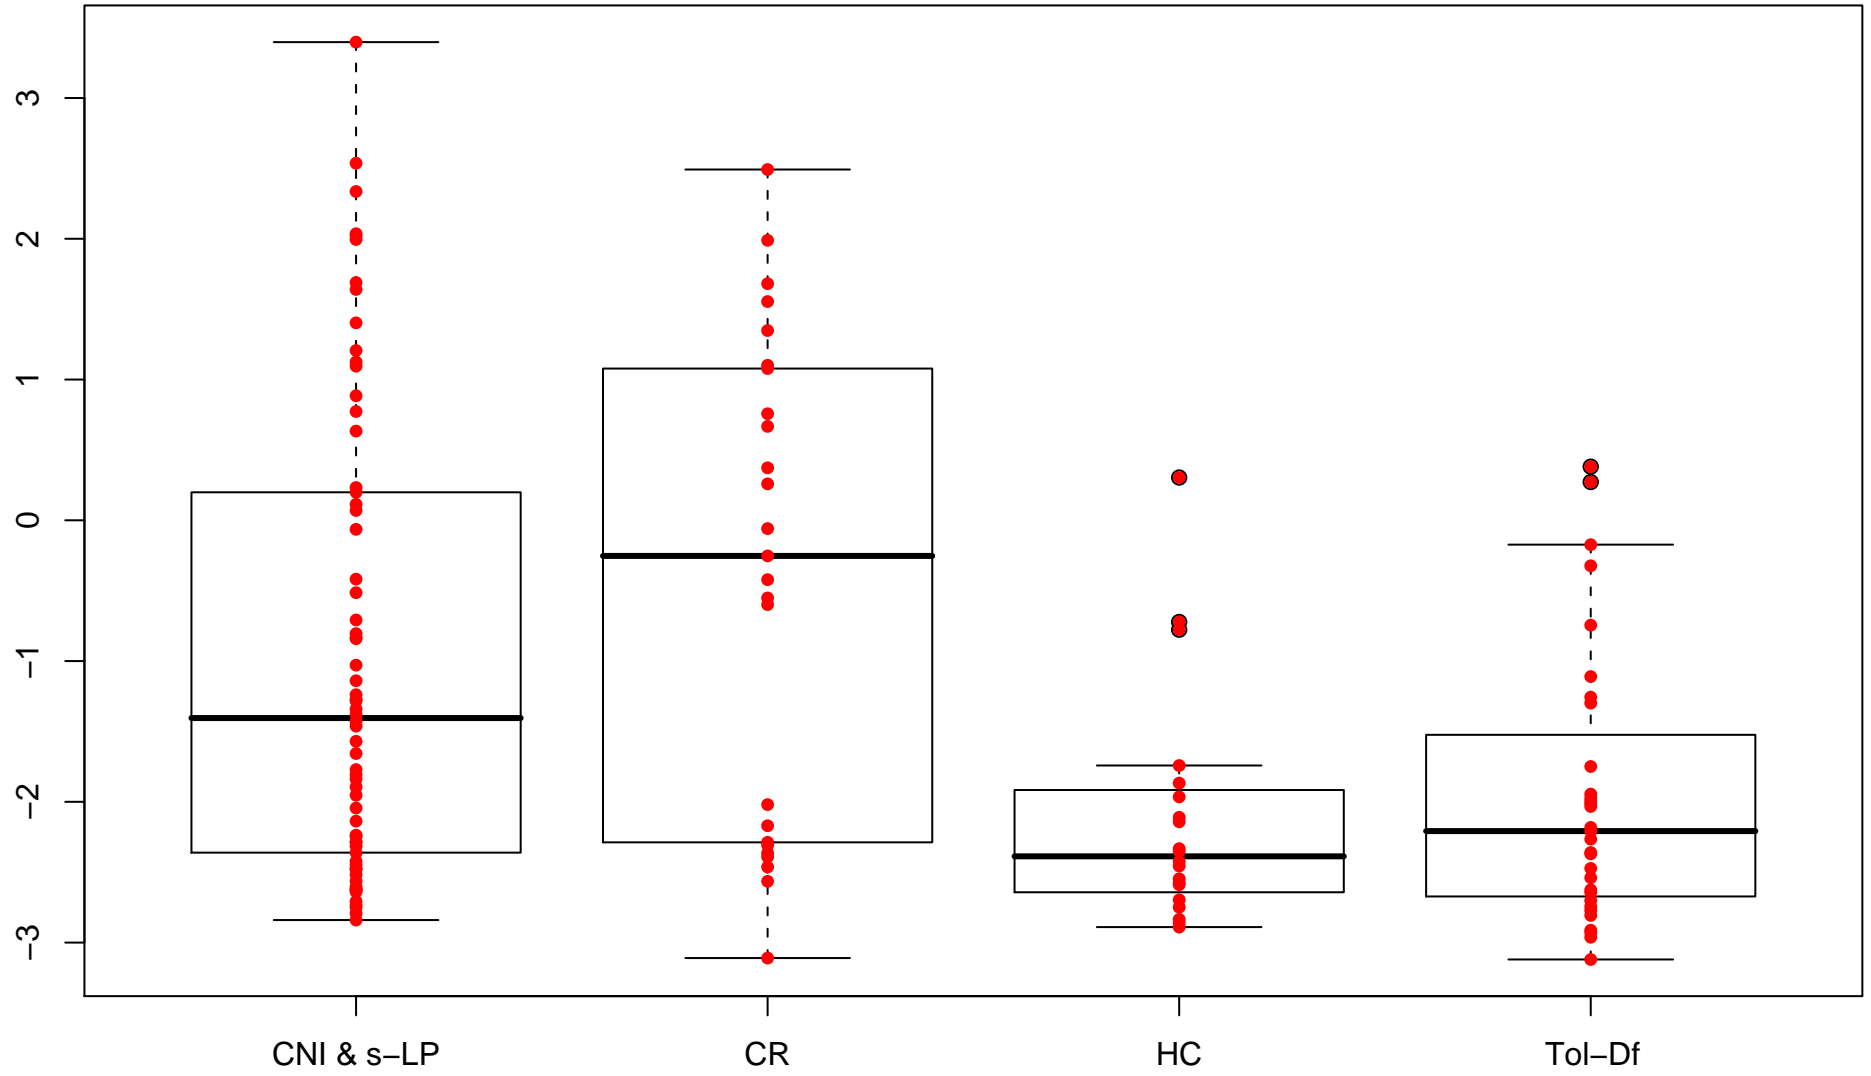

Rank 411 : MKI67IP  
0.00012106

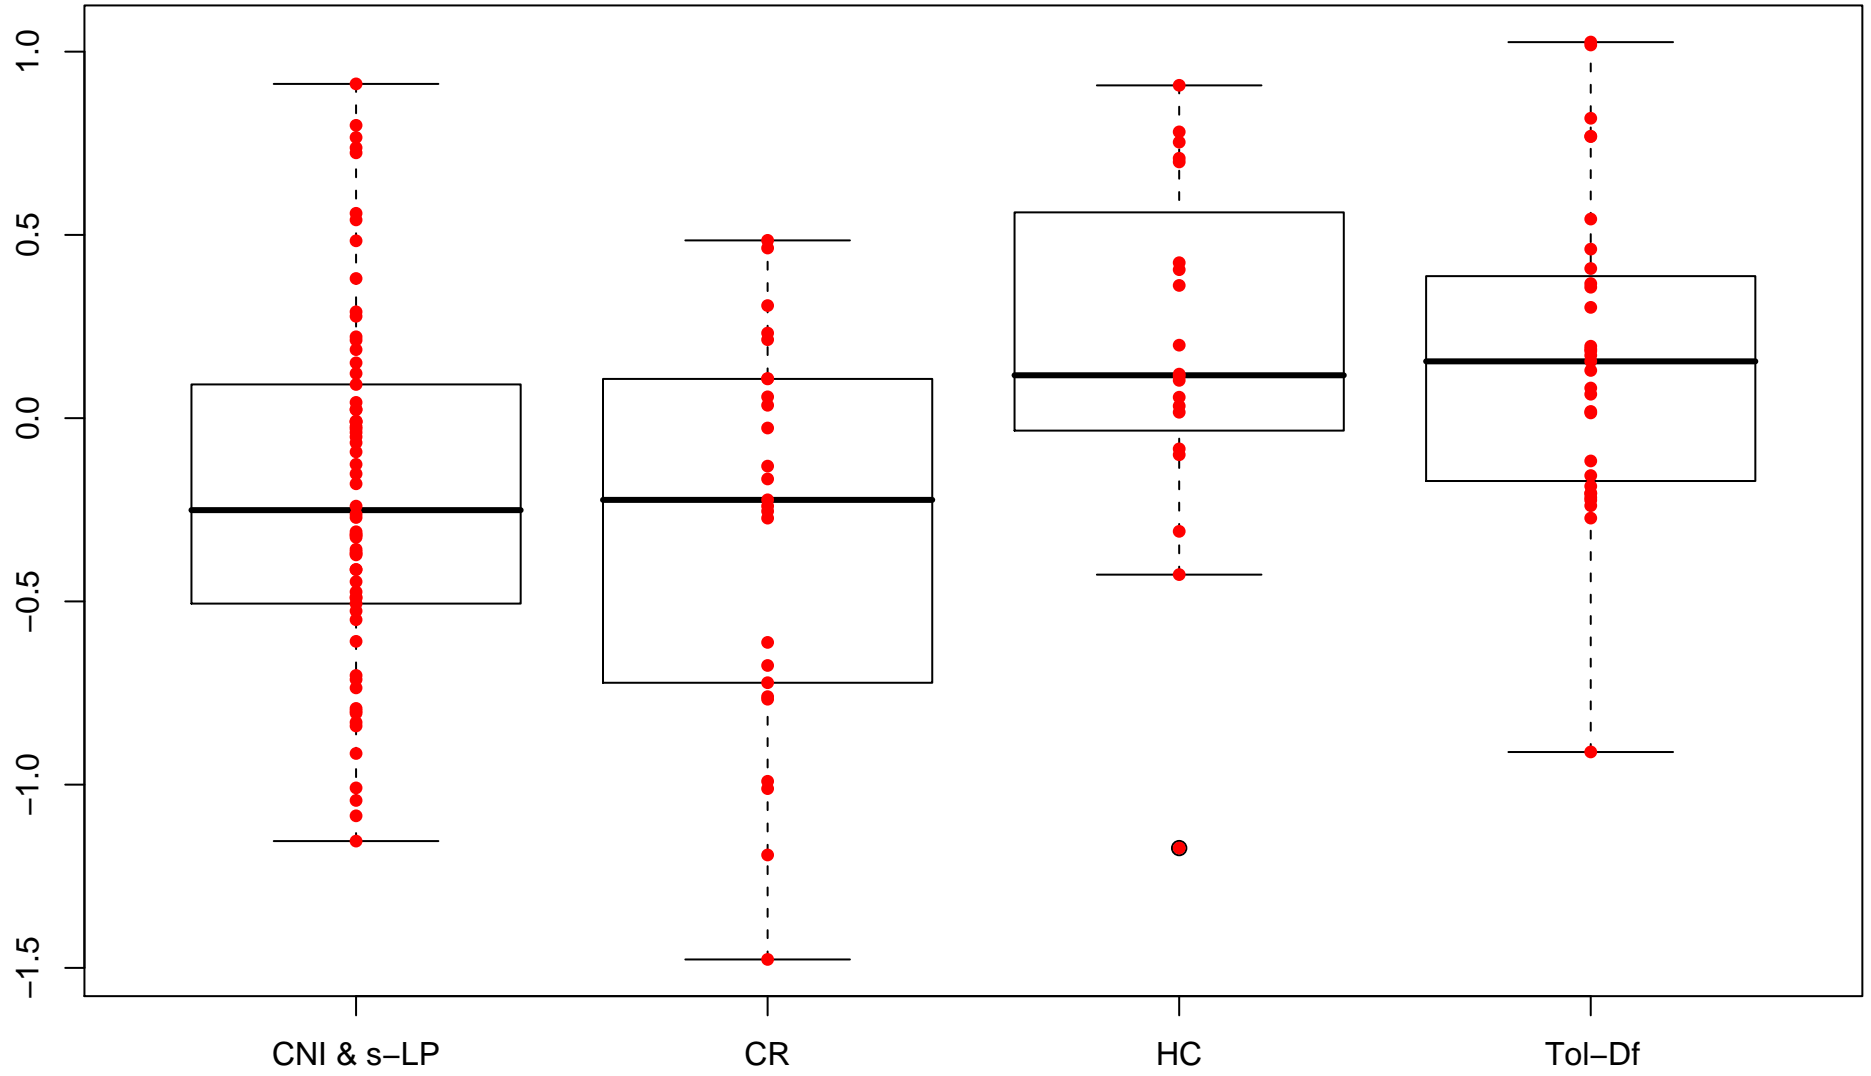

Rank 412 : C16ORF63  
0.00012154

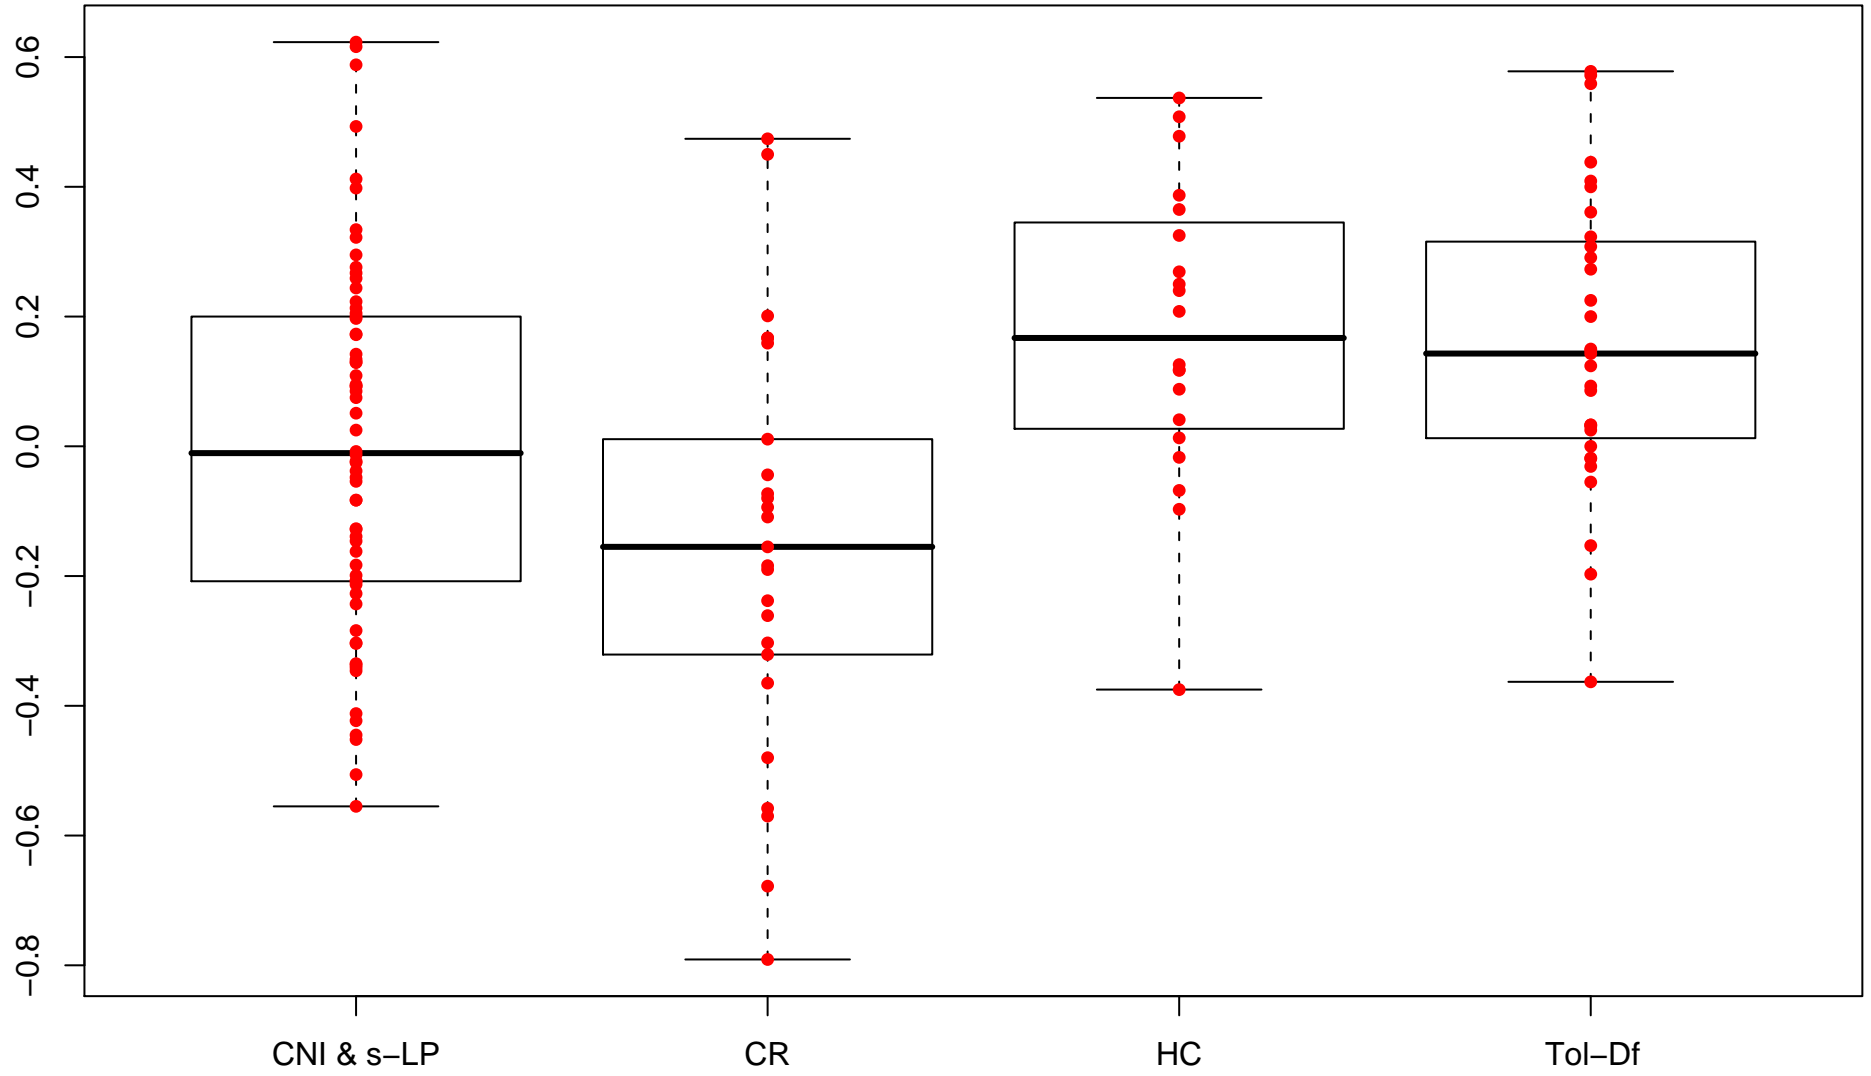

Rank 413 : PEX3  
0.00012272

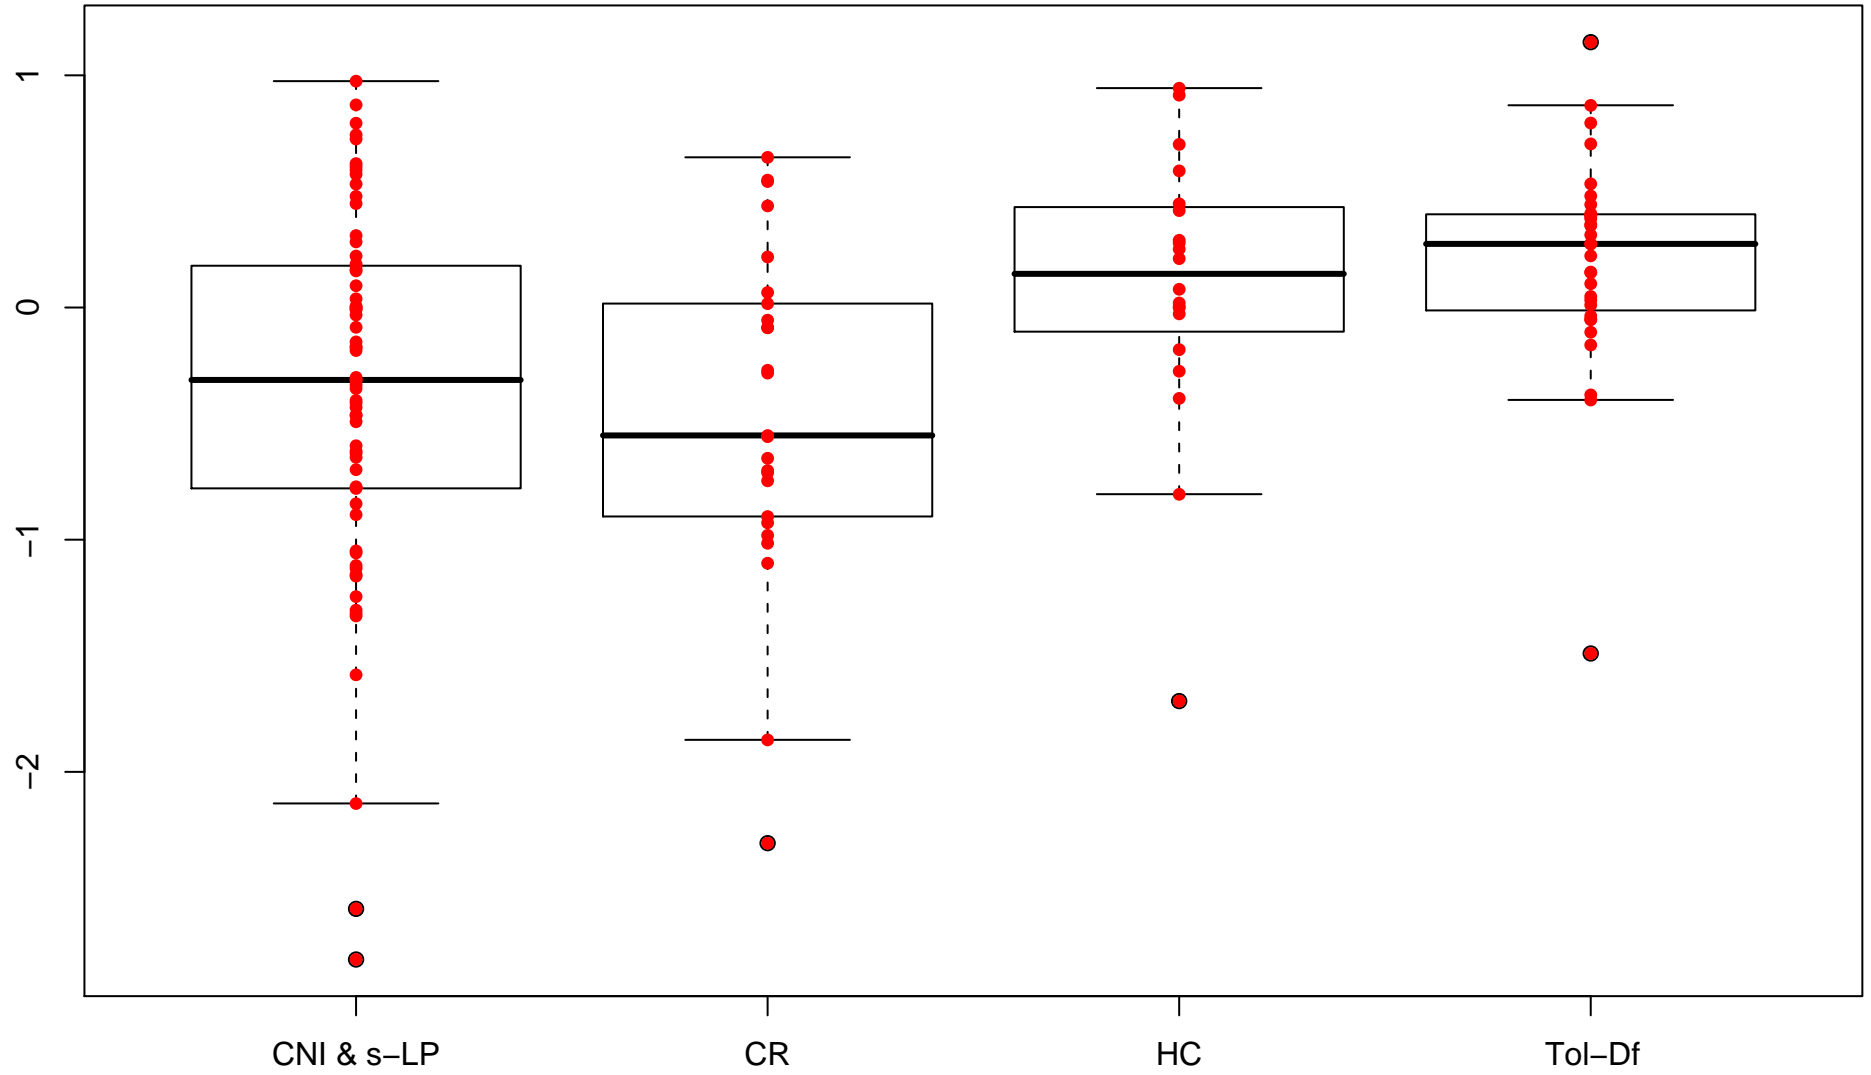

Rank 414 : FLJ21272  
0.00012374

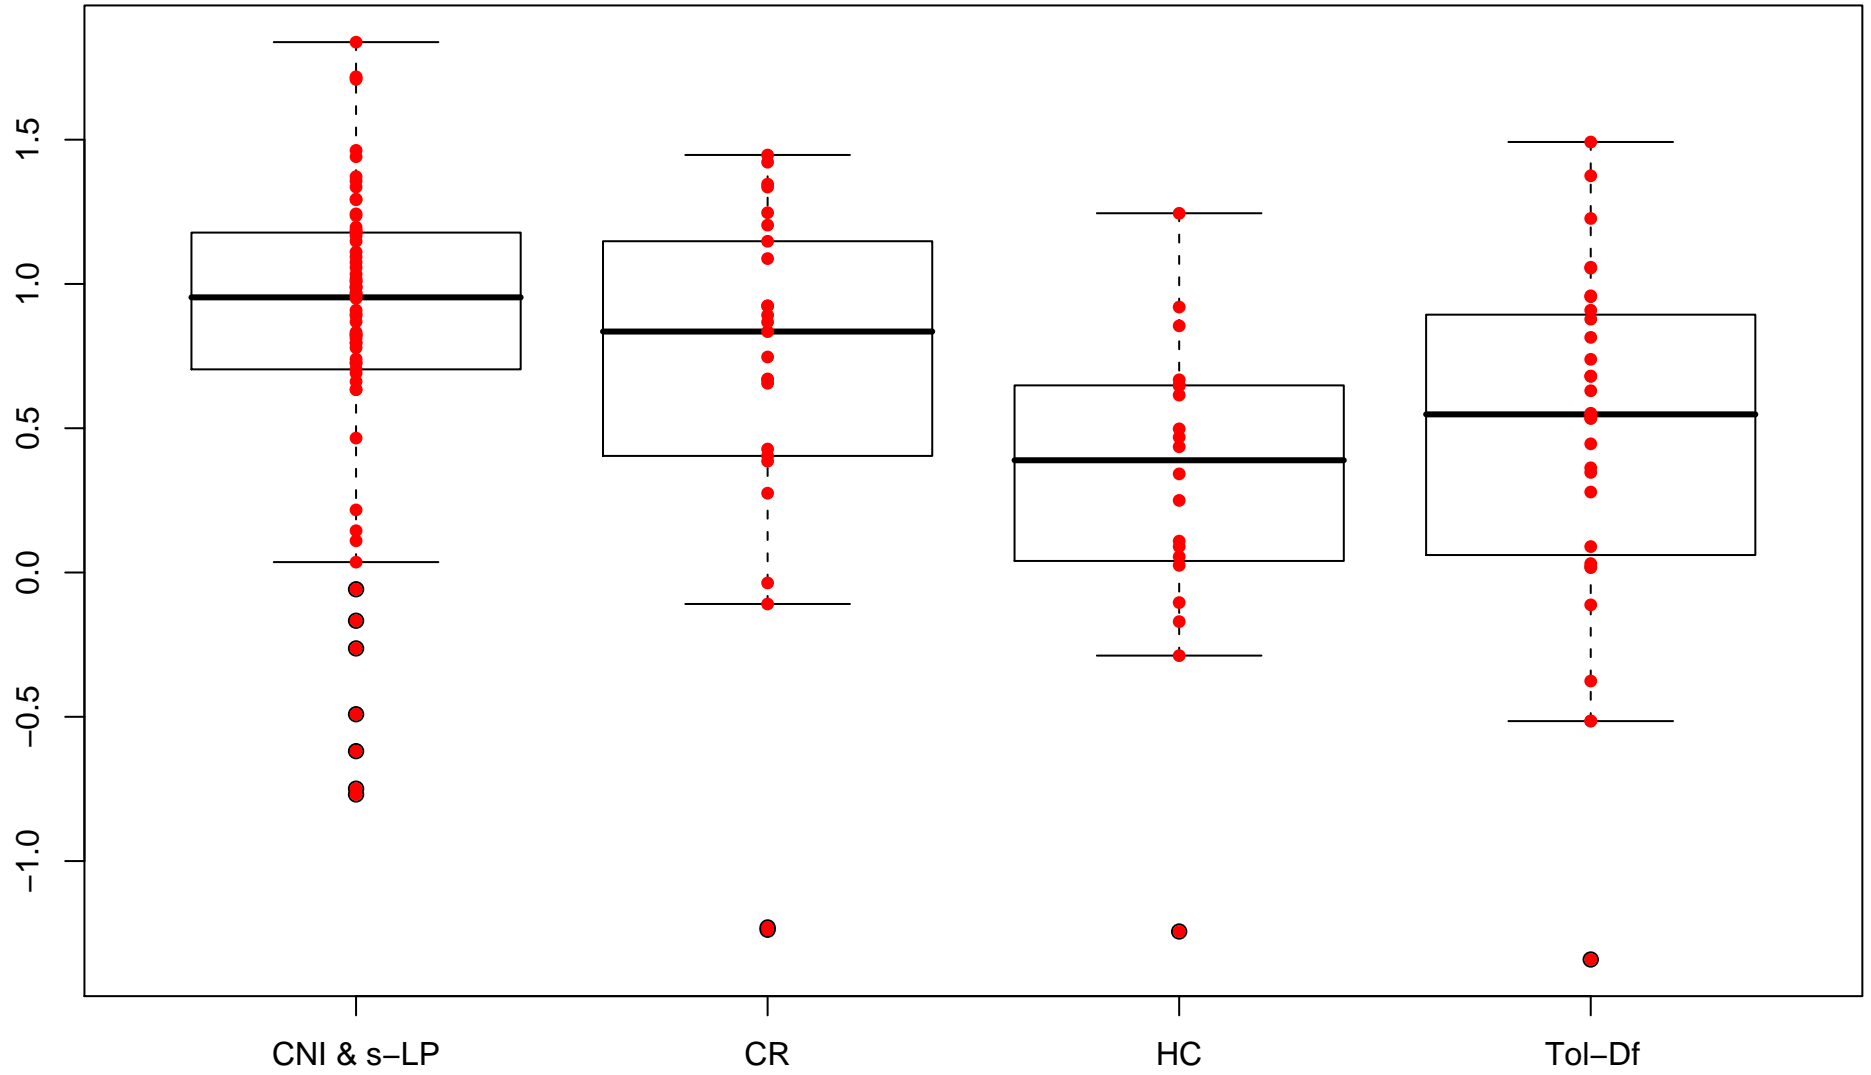

Rank 415 : TOP2B  
0.00012376

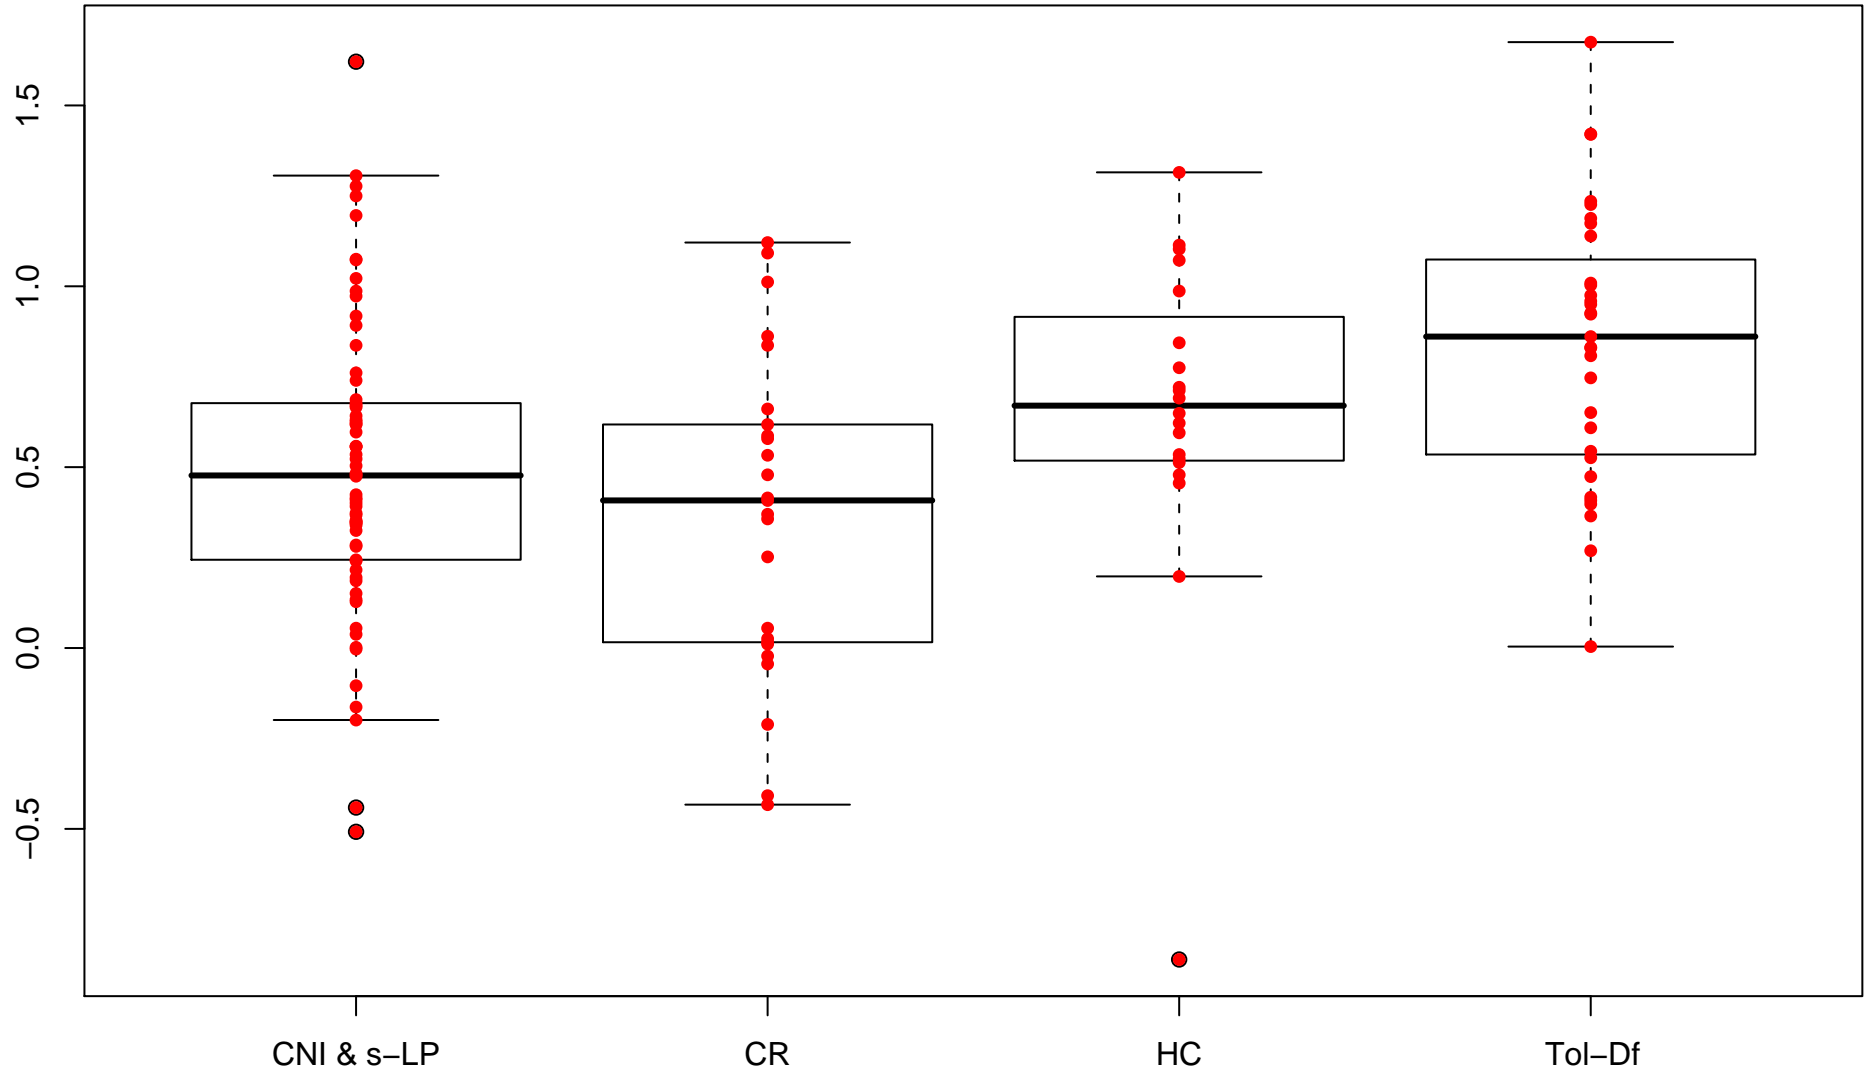



Rank 416 : ICAM2  
0.00012776

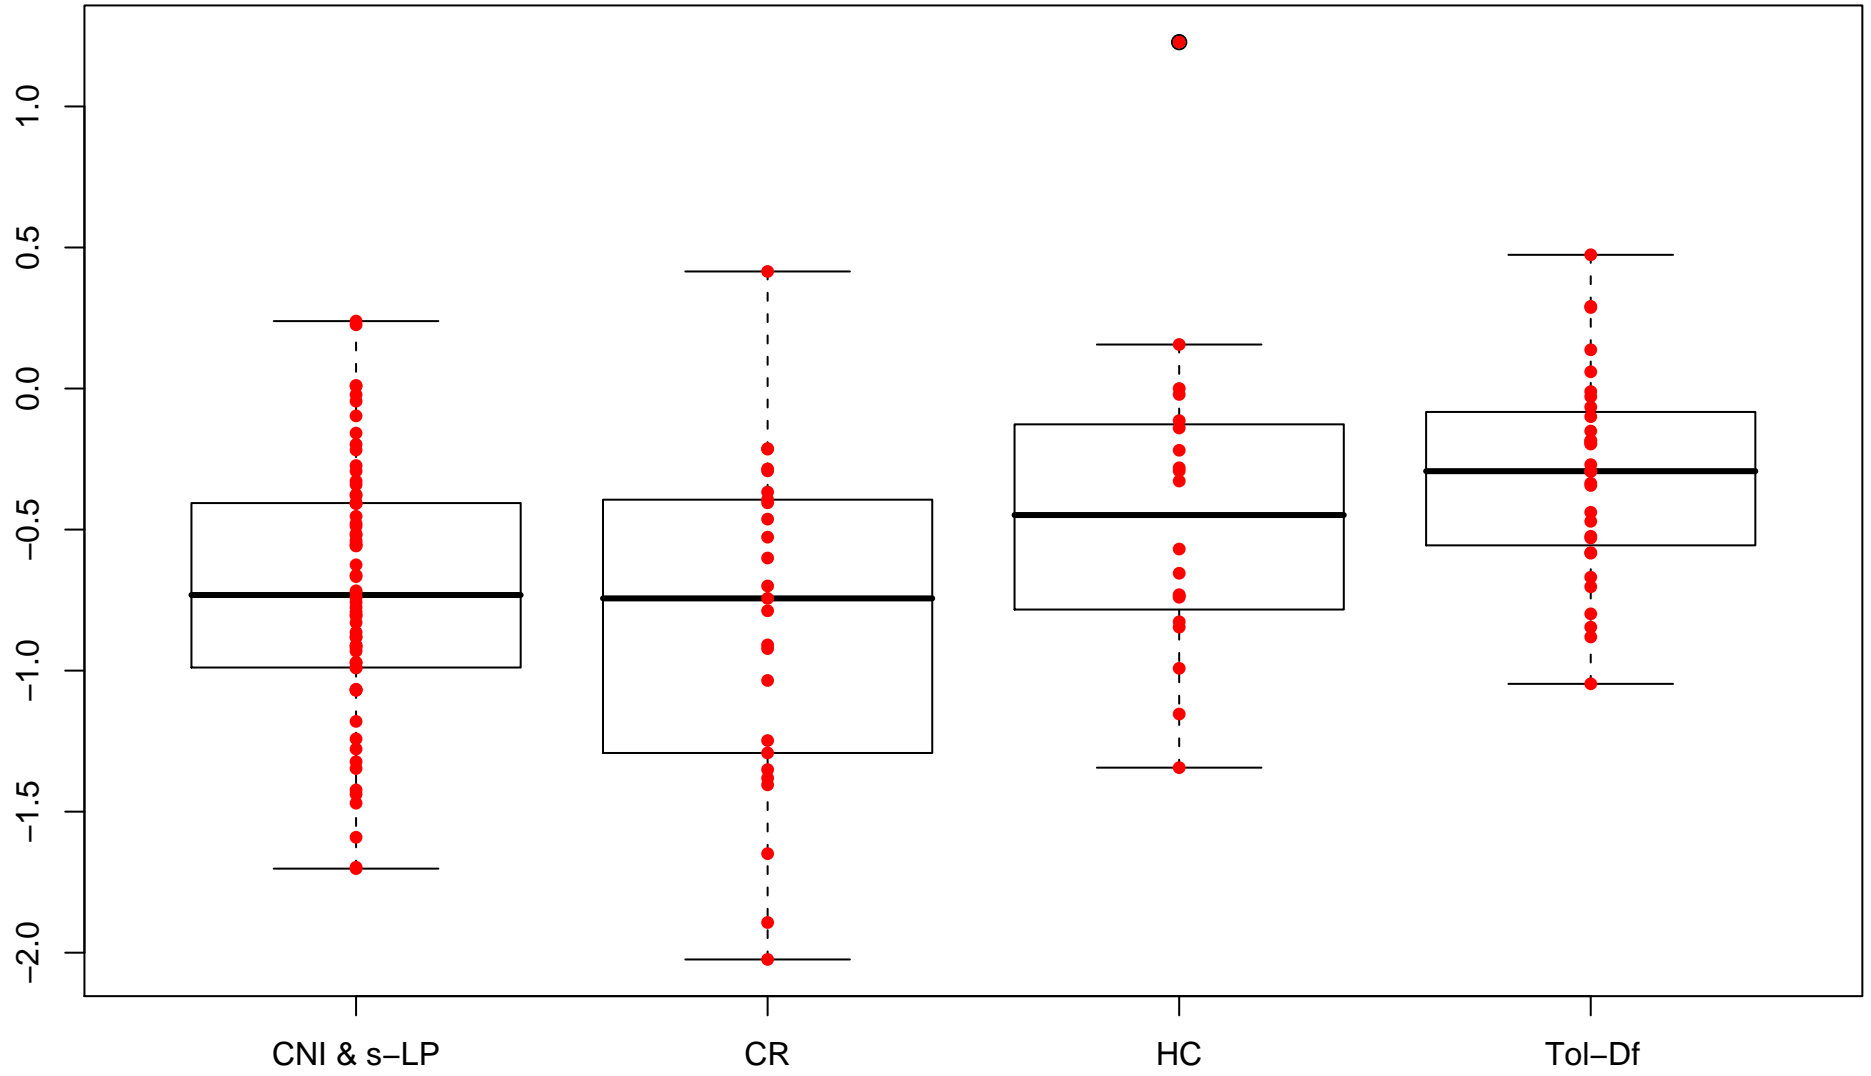

Rank 417 : WWP2  
0.0001288

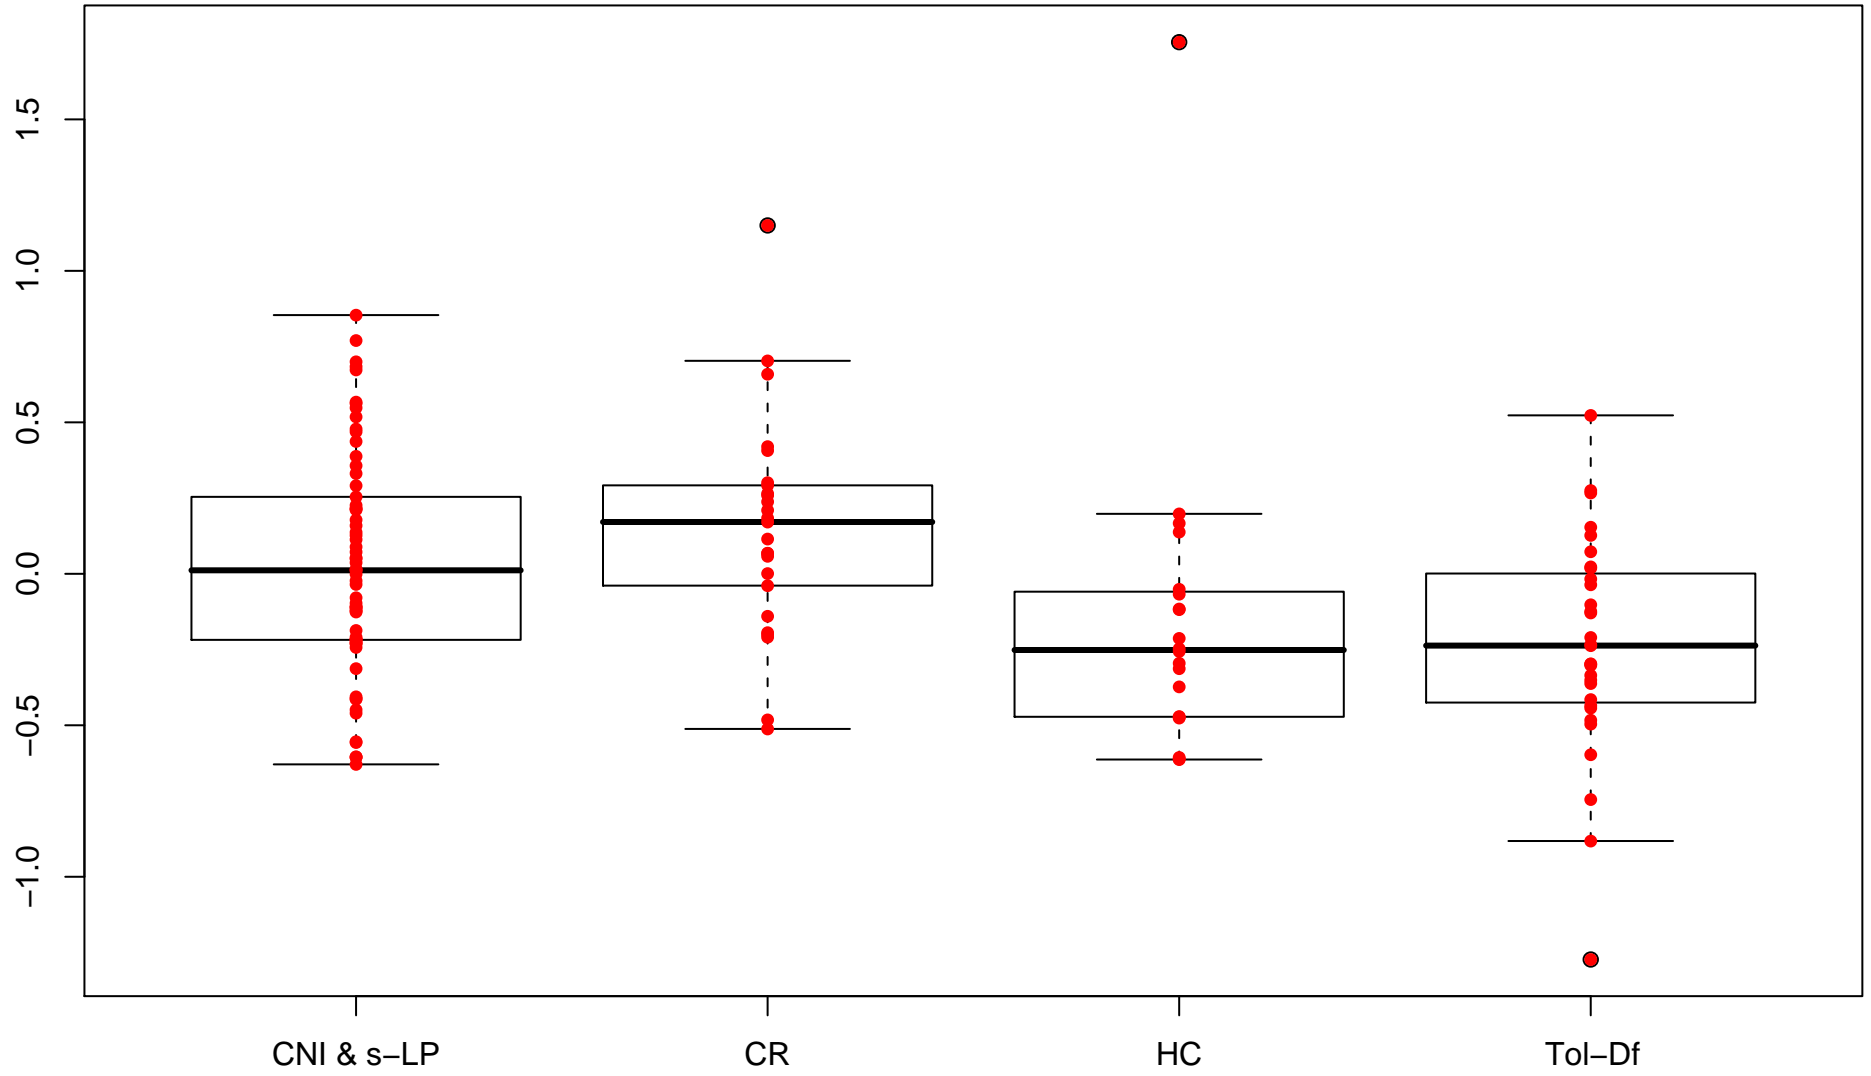

Rank 418 : SMAD3  
0.00012971

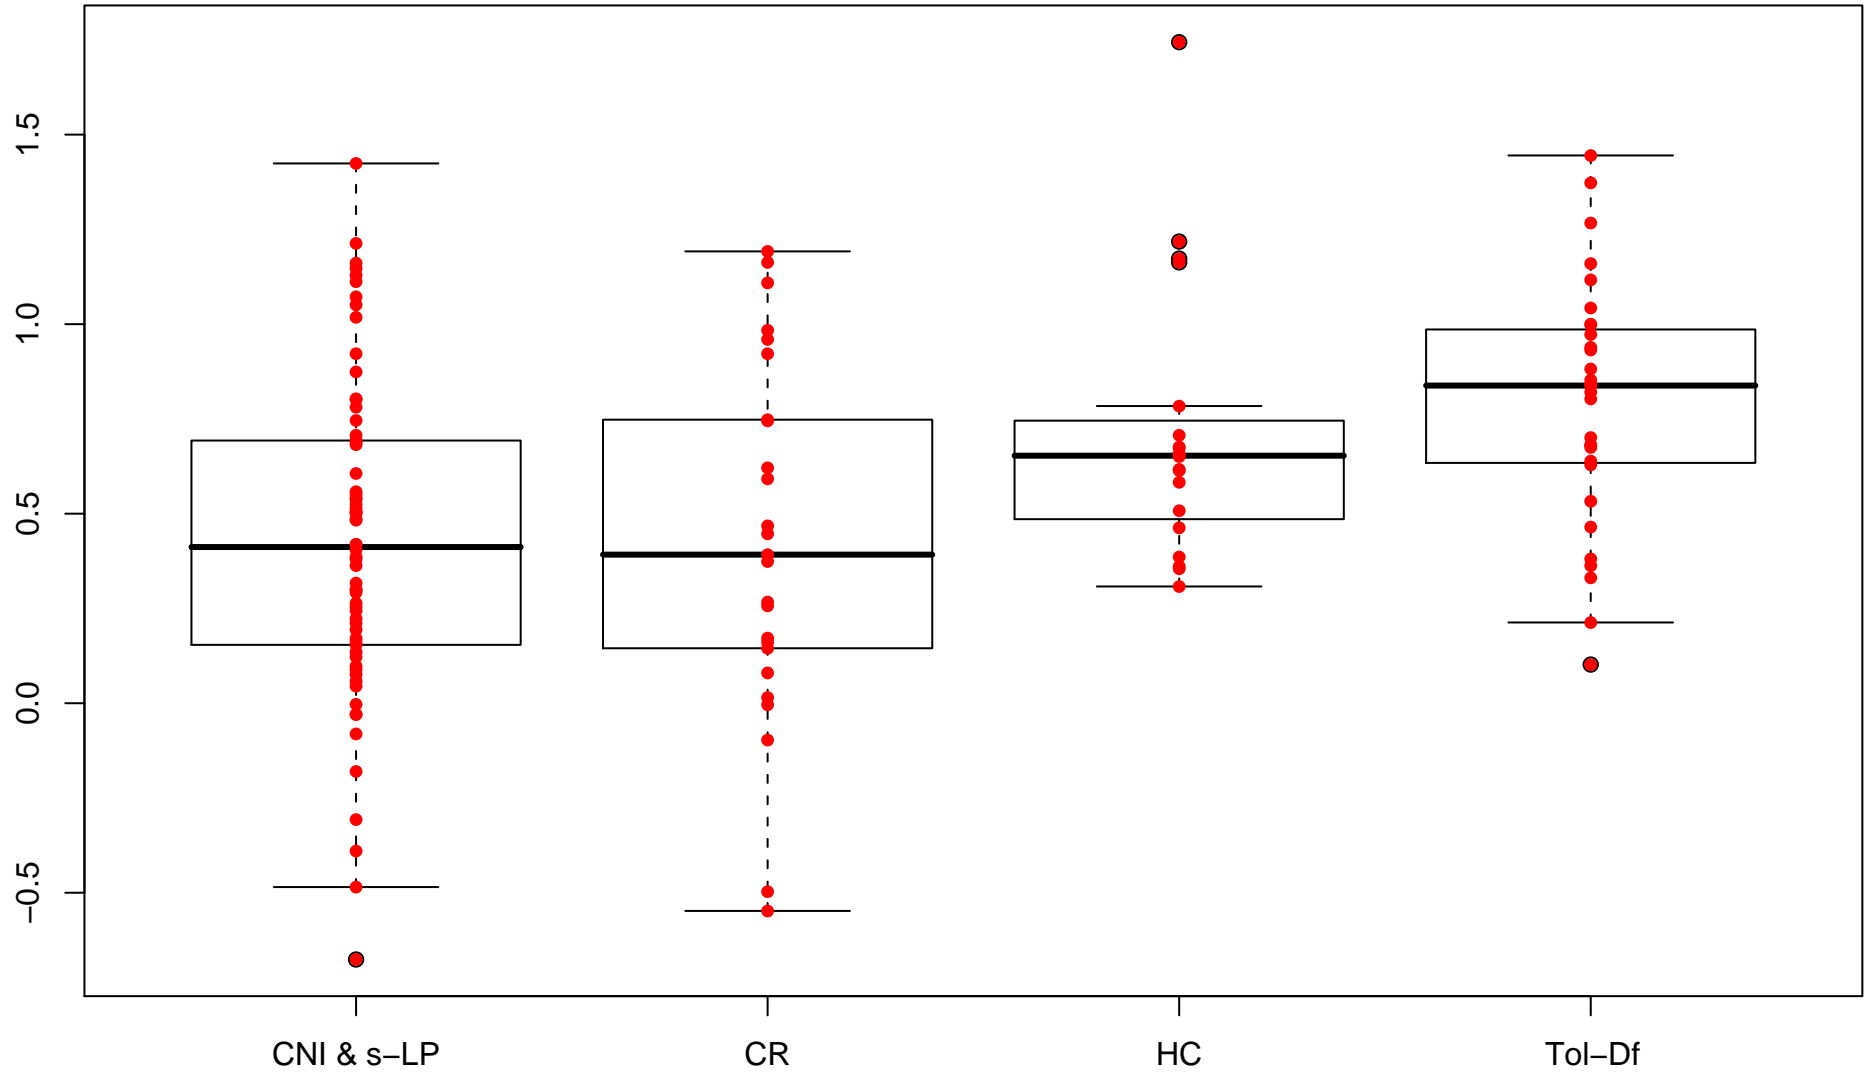

Rank 419 : QRSL1  
0.00013028

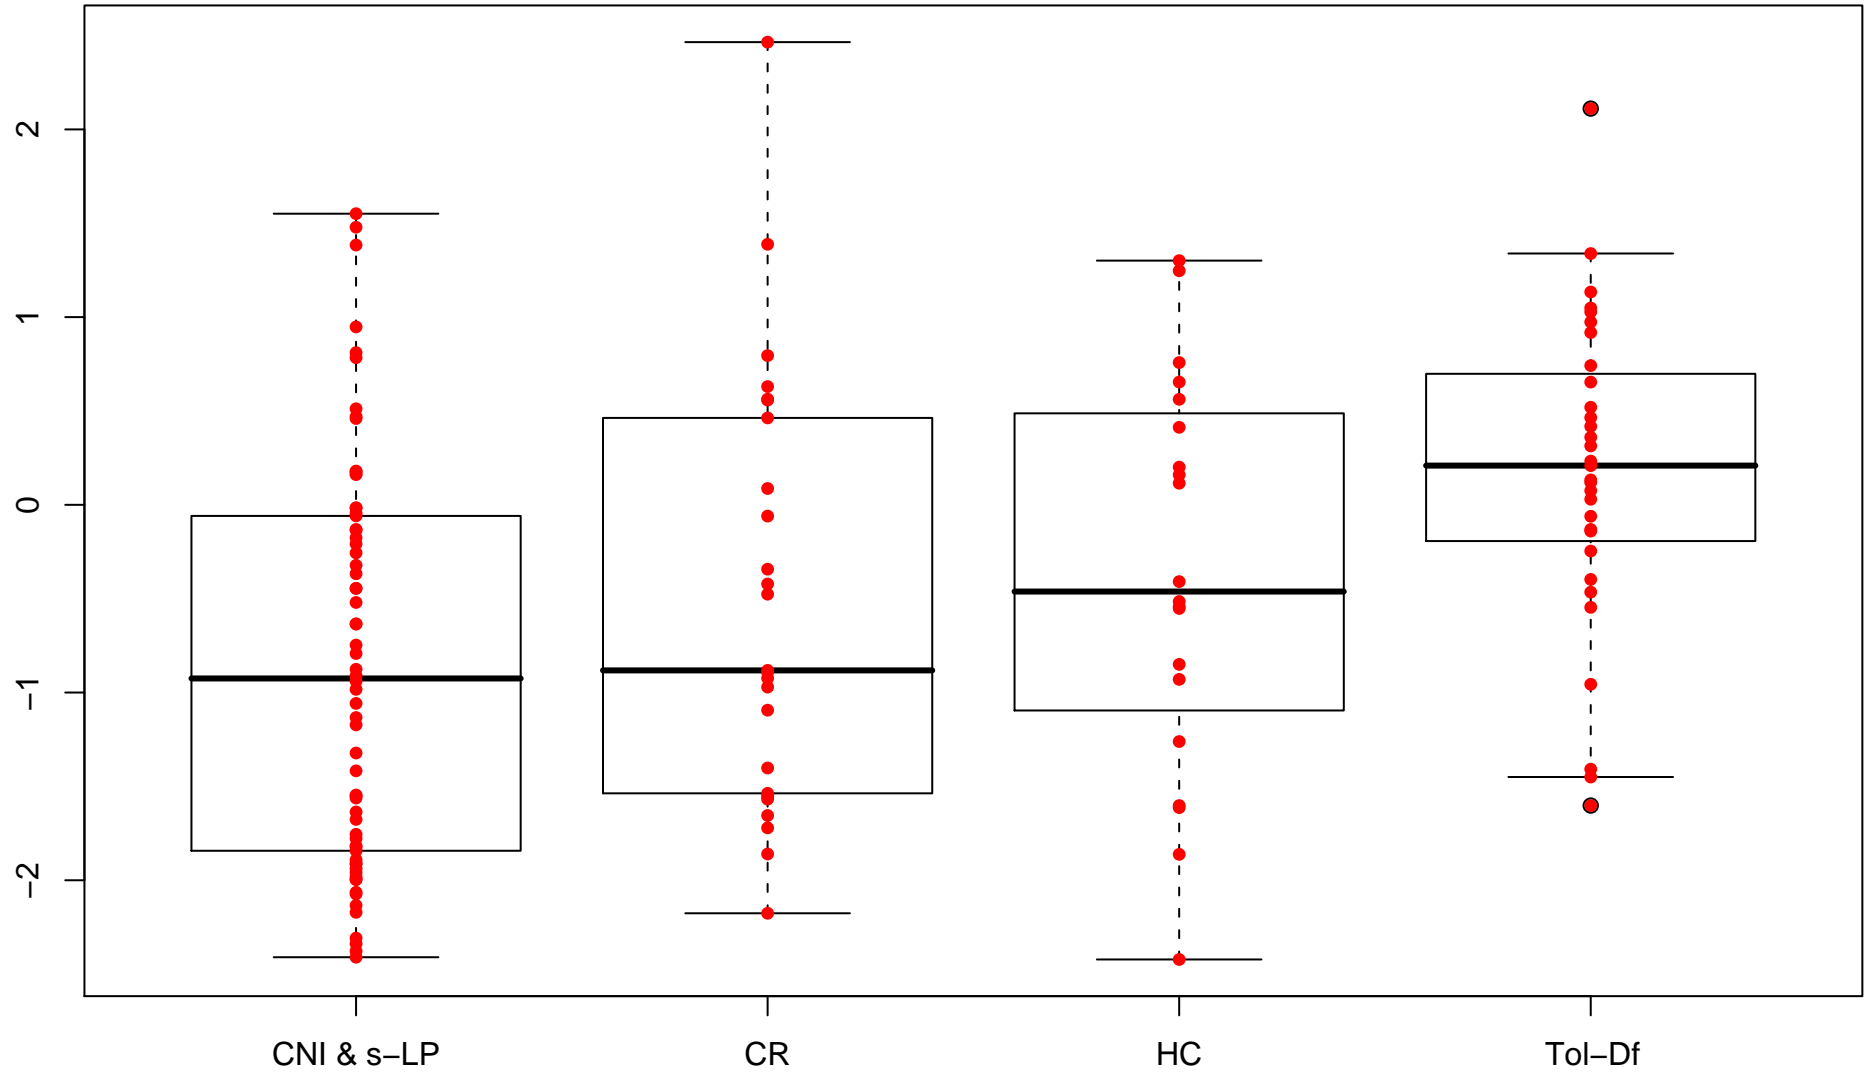

Rank 420 : APOB48R  
0.00013257

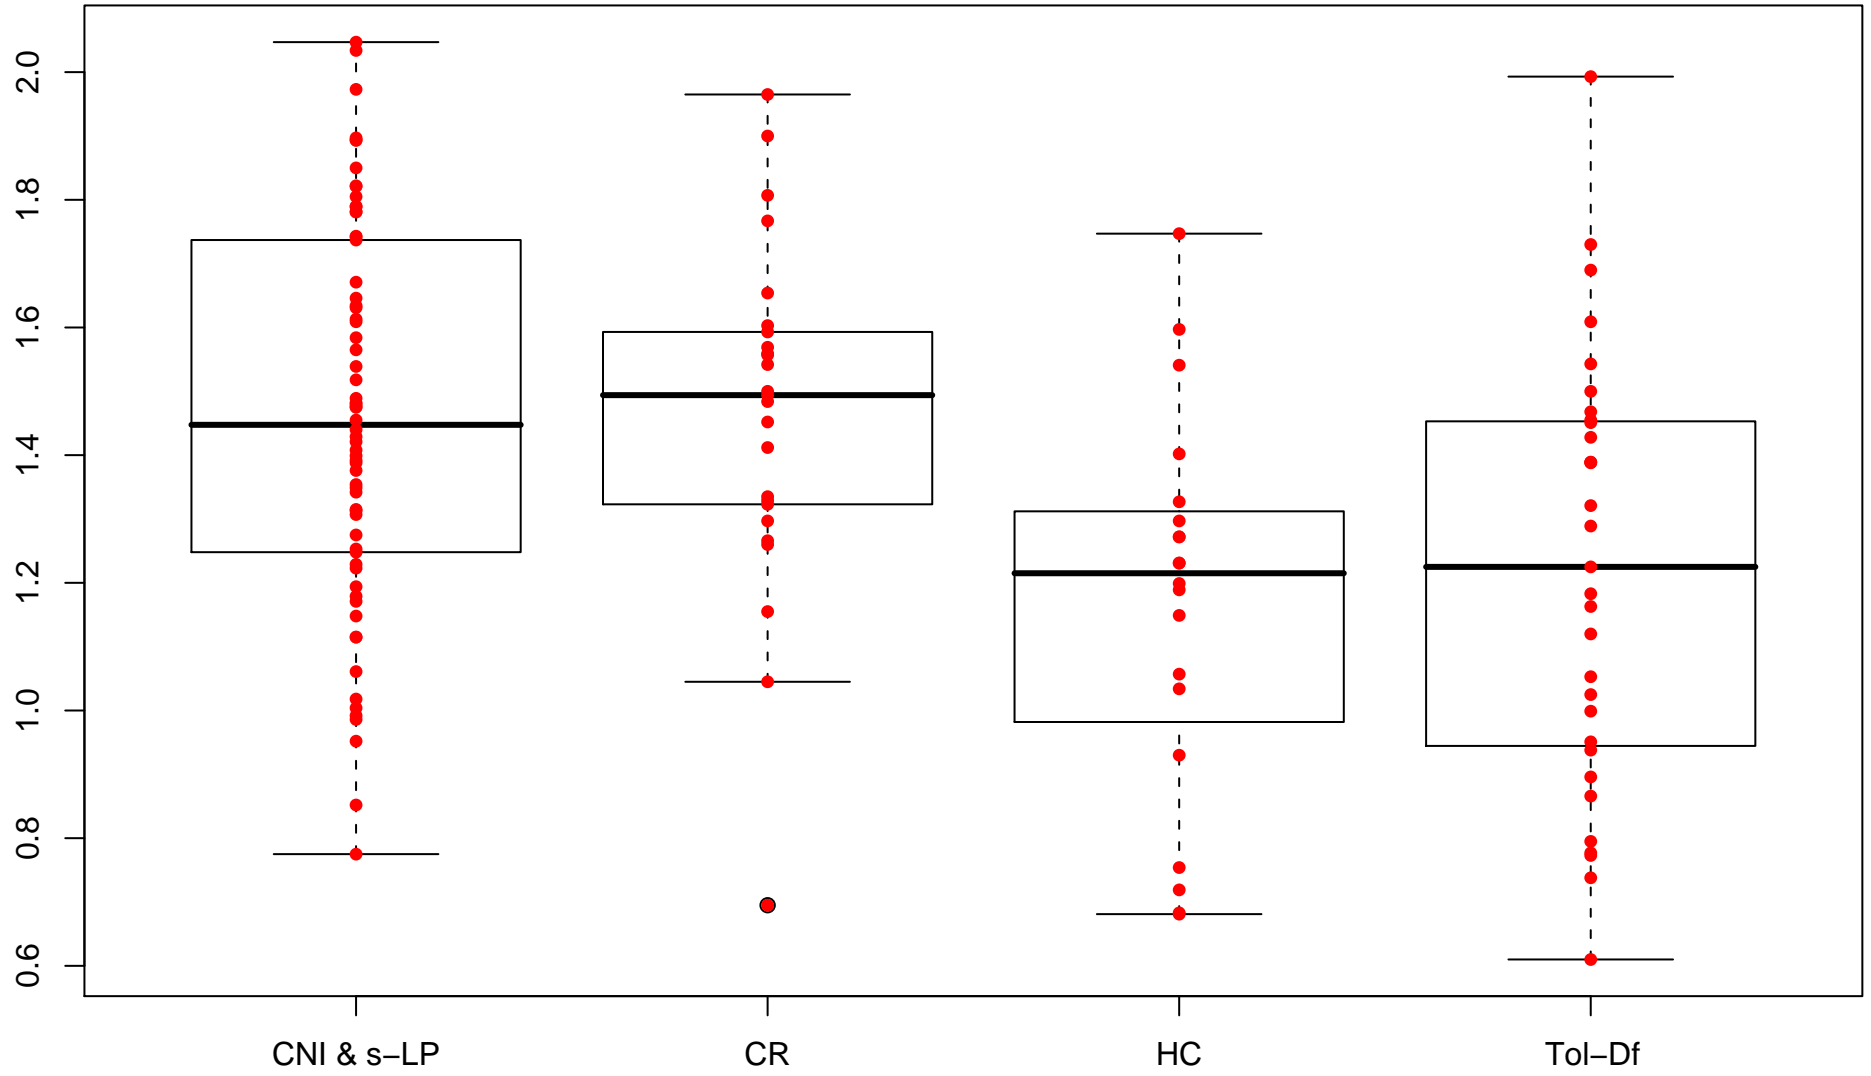

Rank 421 : TNRC8  
0.00013261

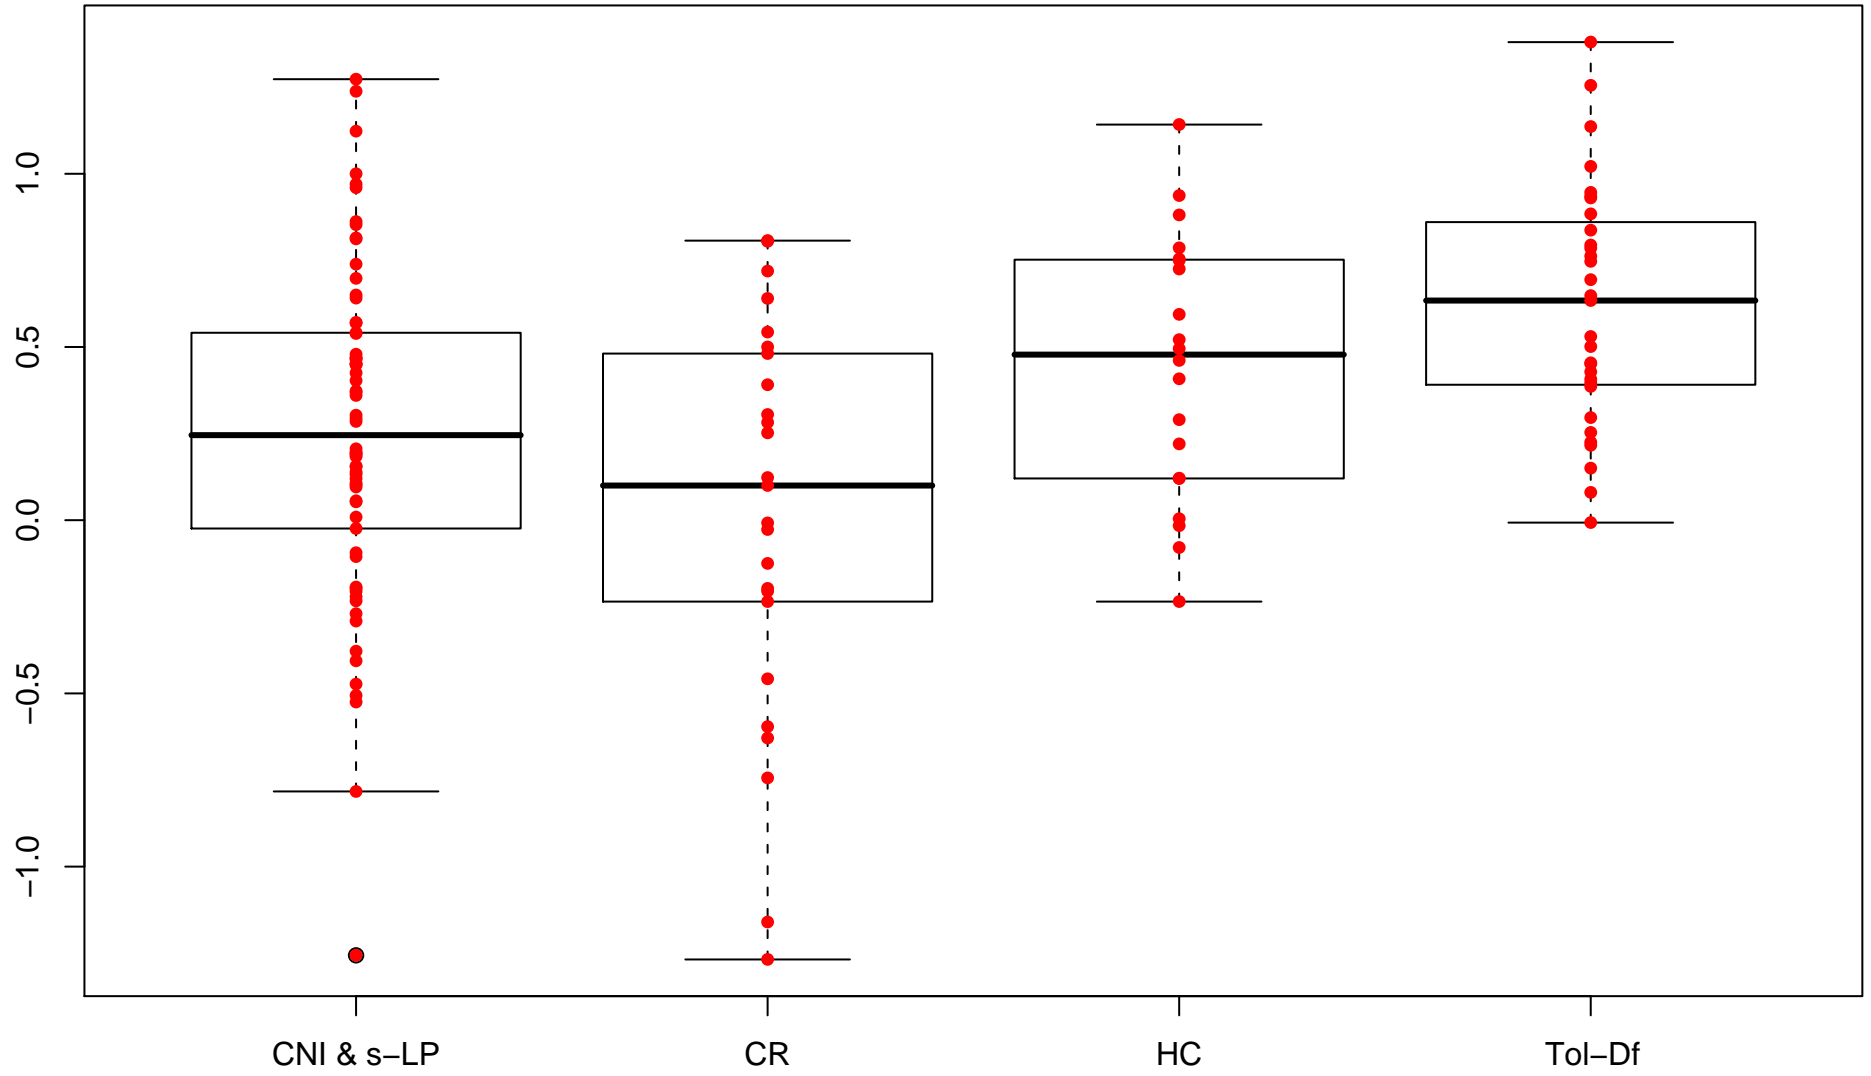

Rank 422 : SLC39A8  
0.00013279

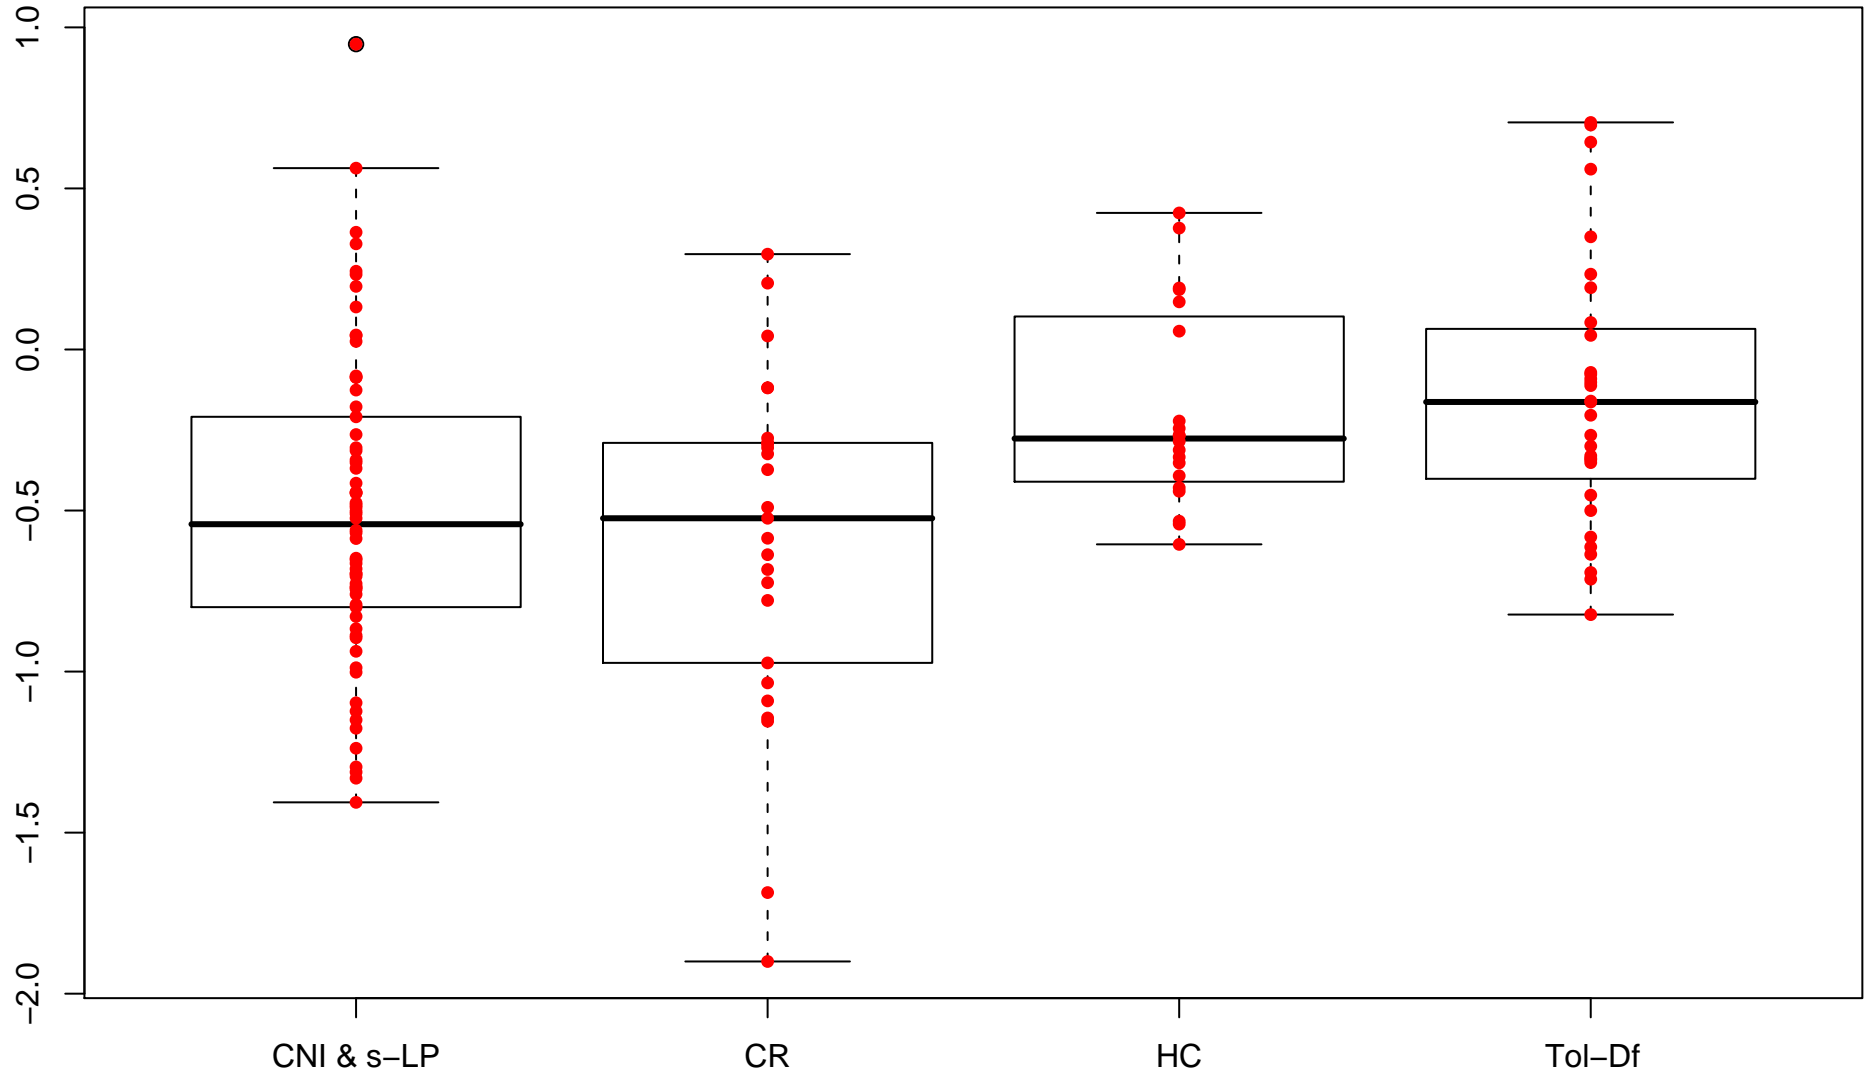

Rank 423 : MAPK14  
0.00013338

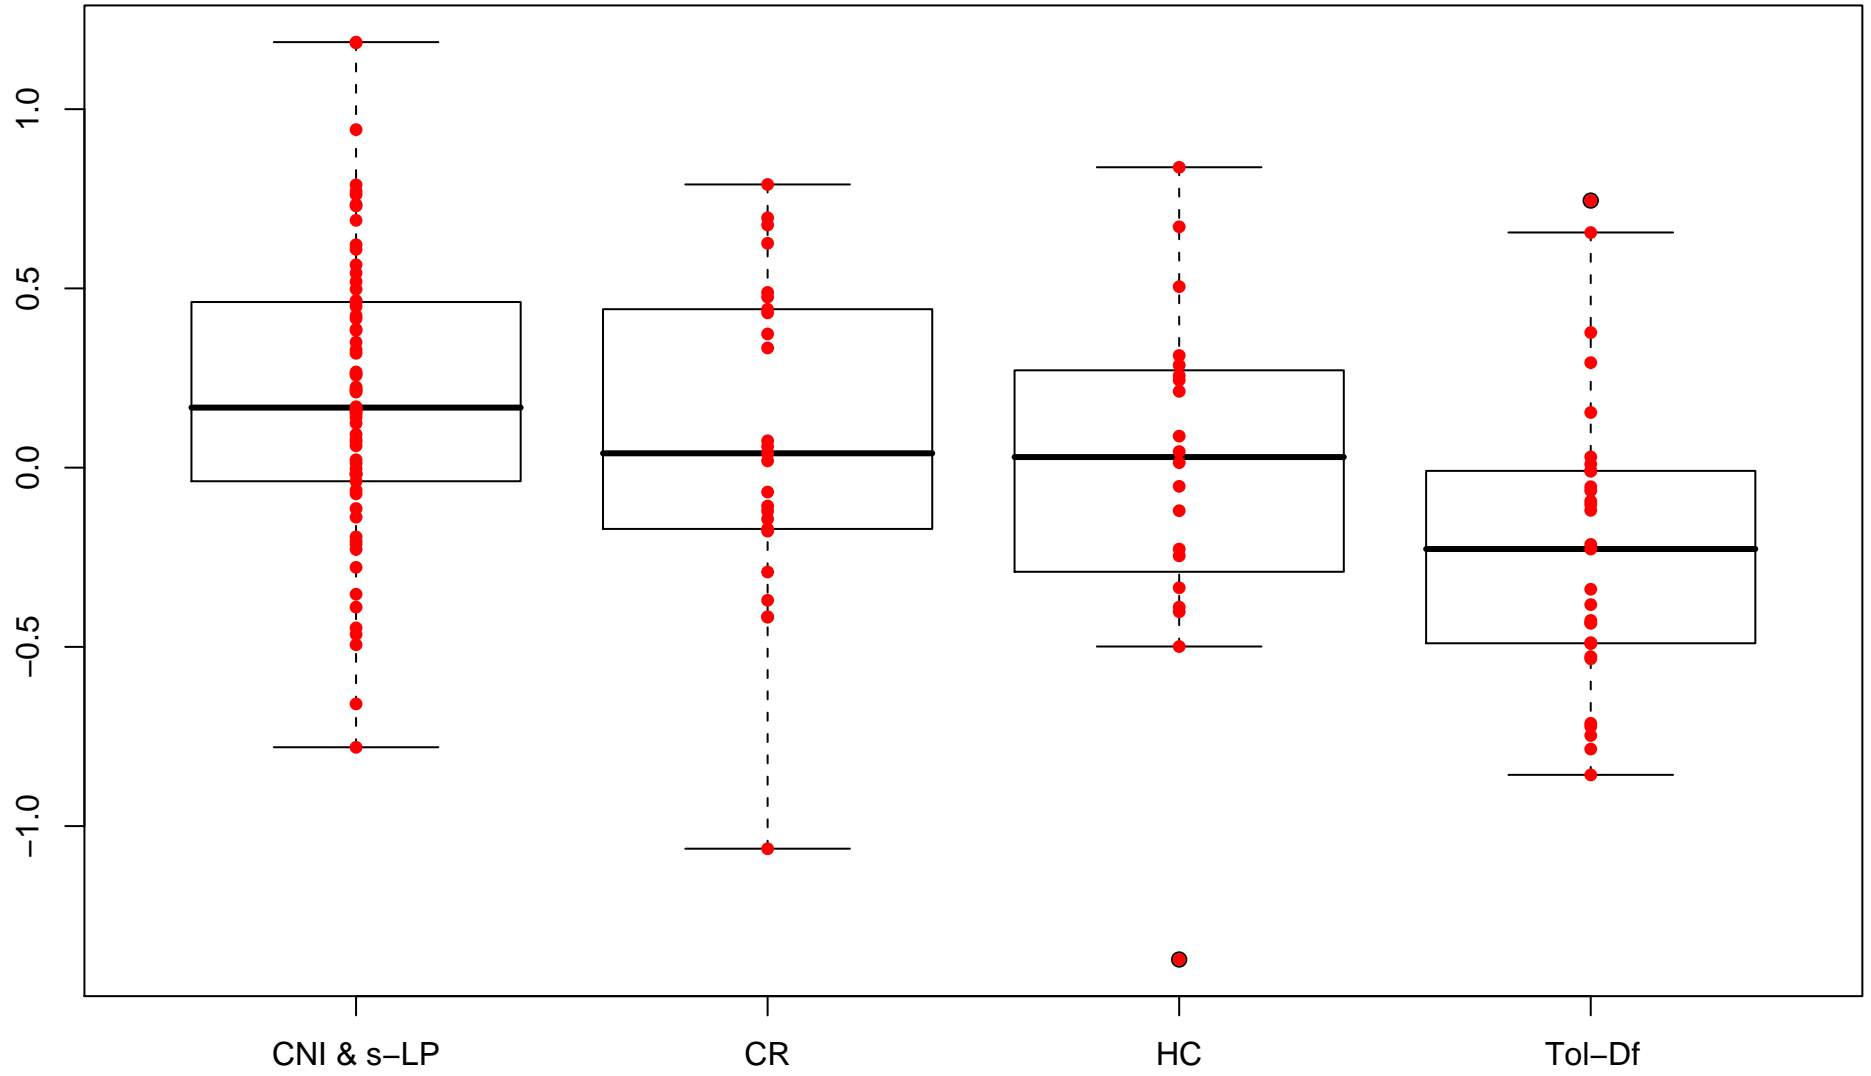



Rank 424 : EFCAB2  
0.00013598

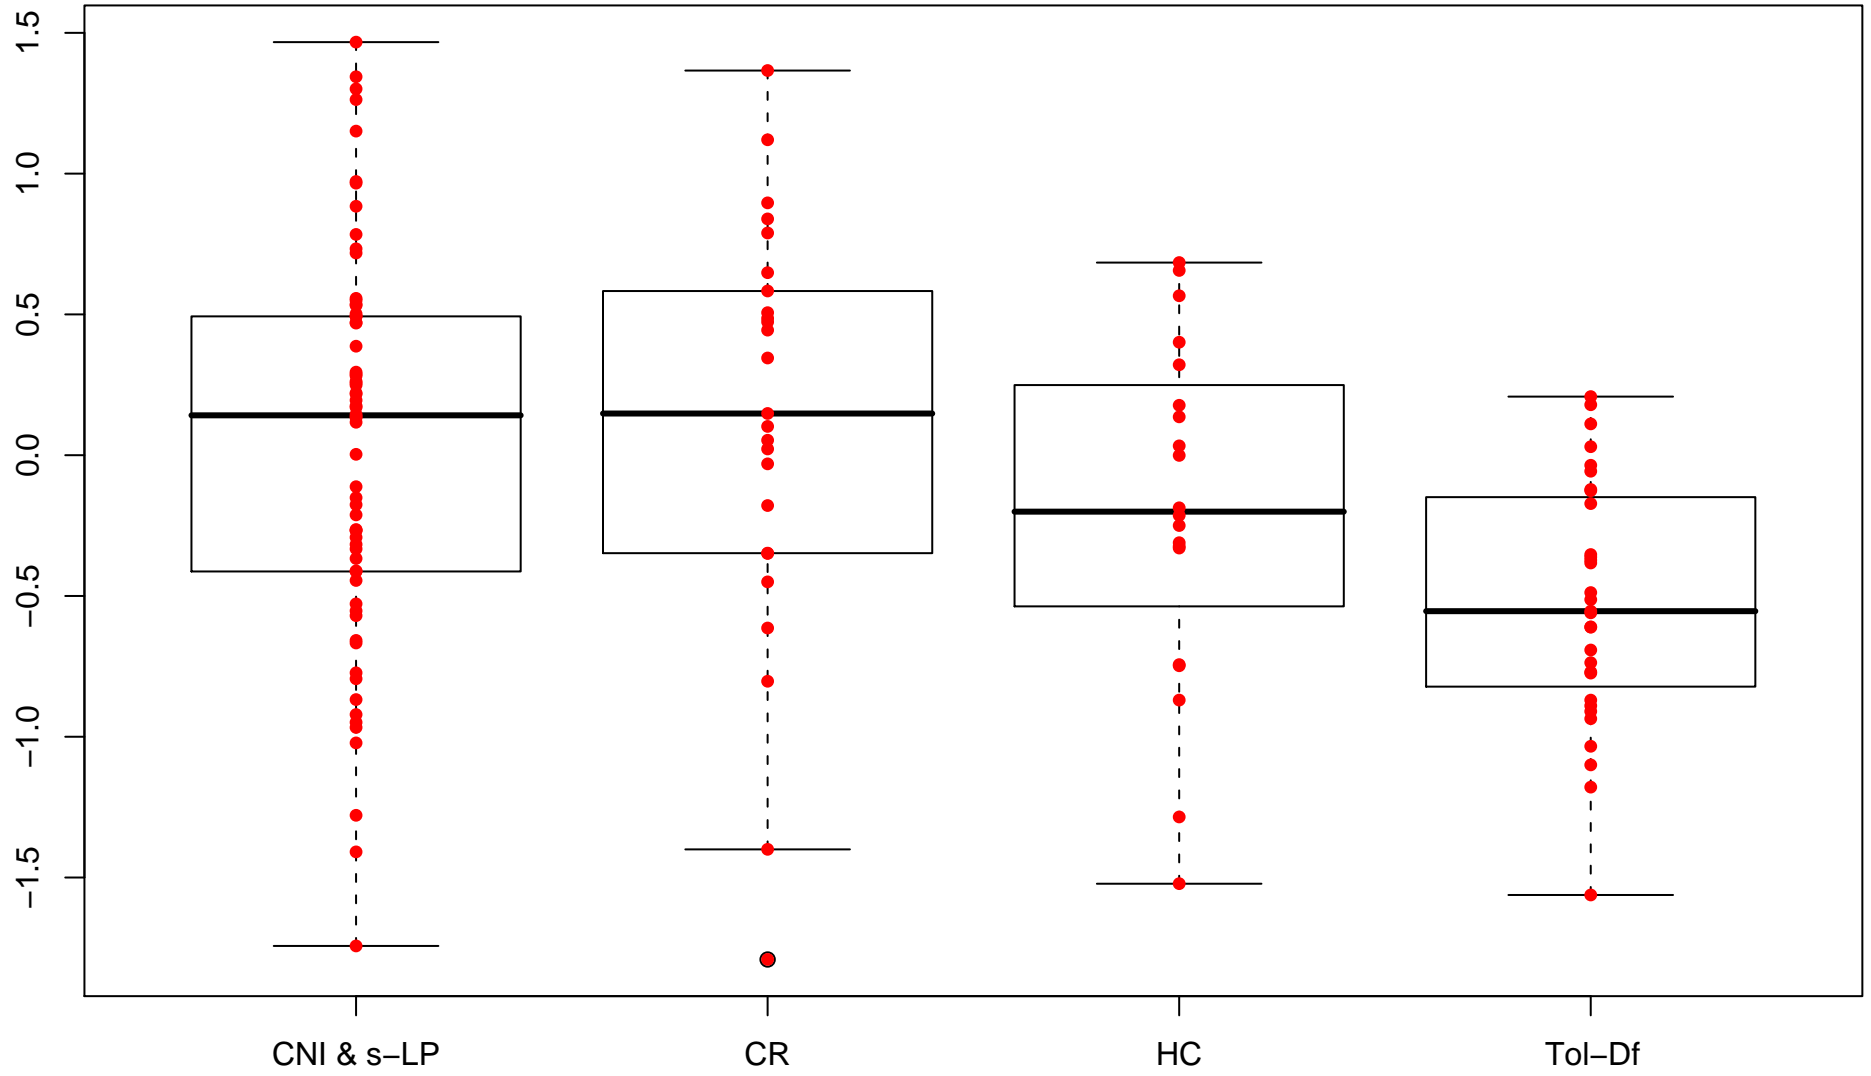

Rank 425 : PRKCD  
0.00013663

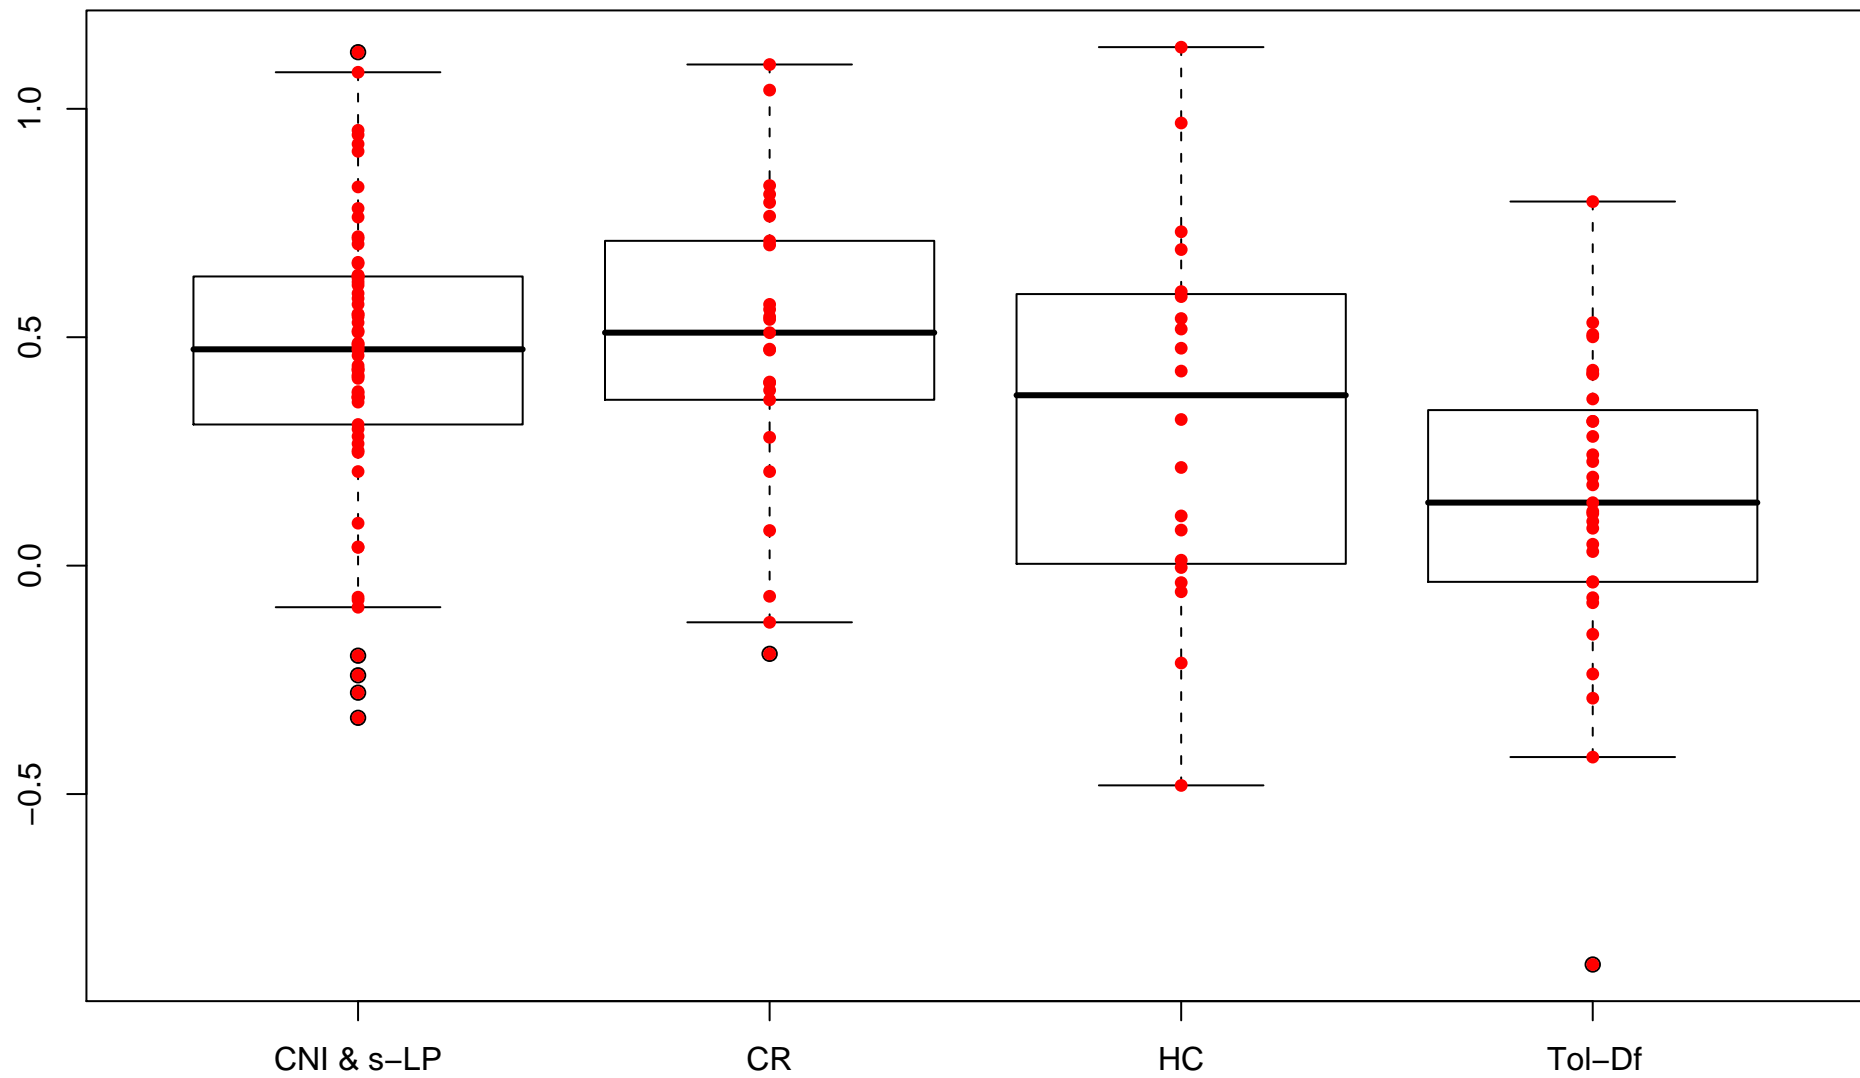

Rank 426 : WDR21A  
0.00013692

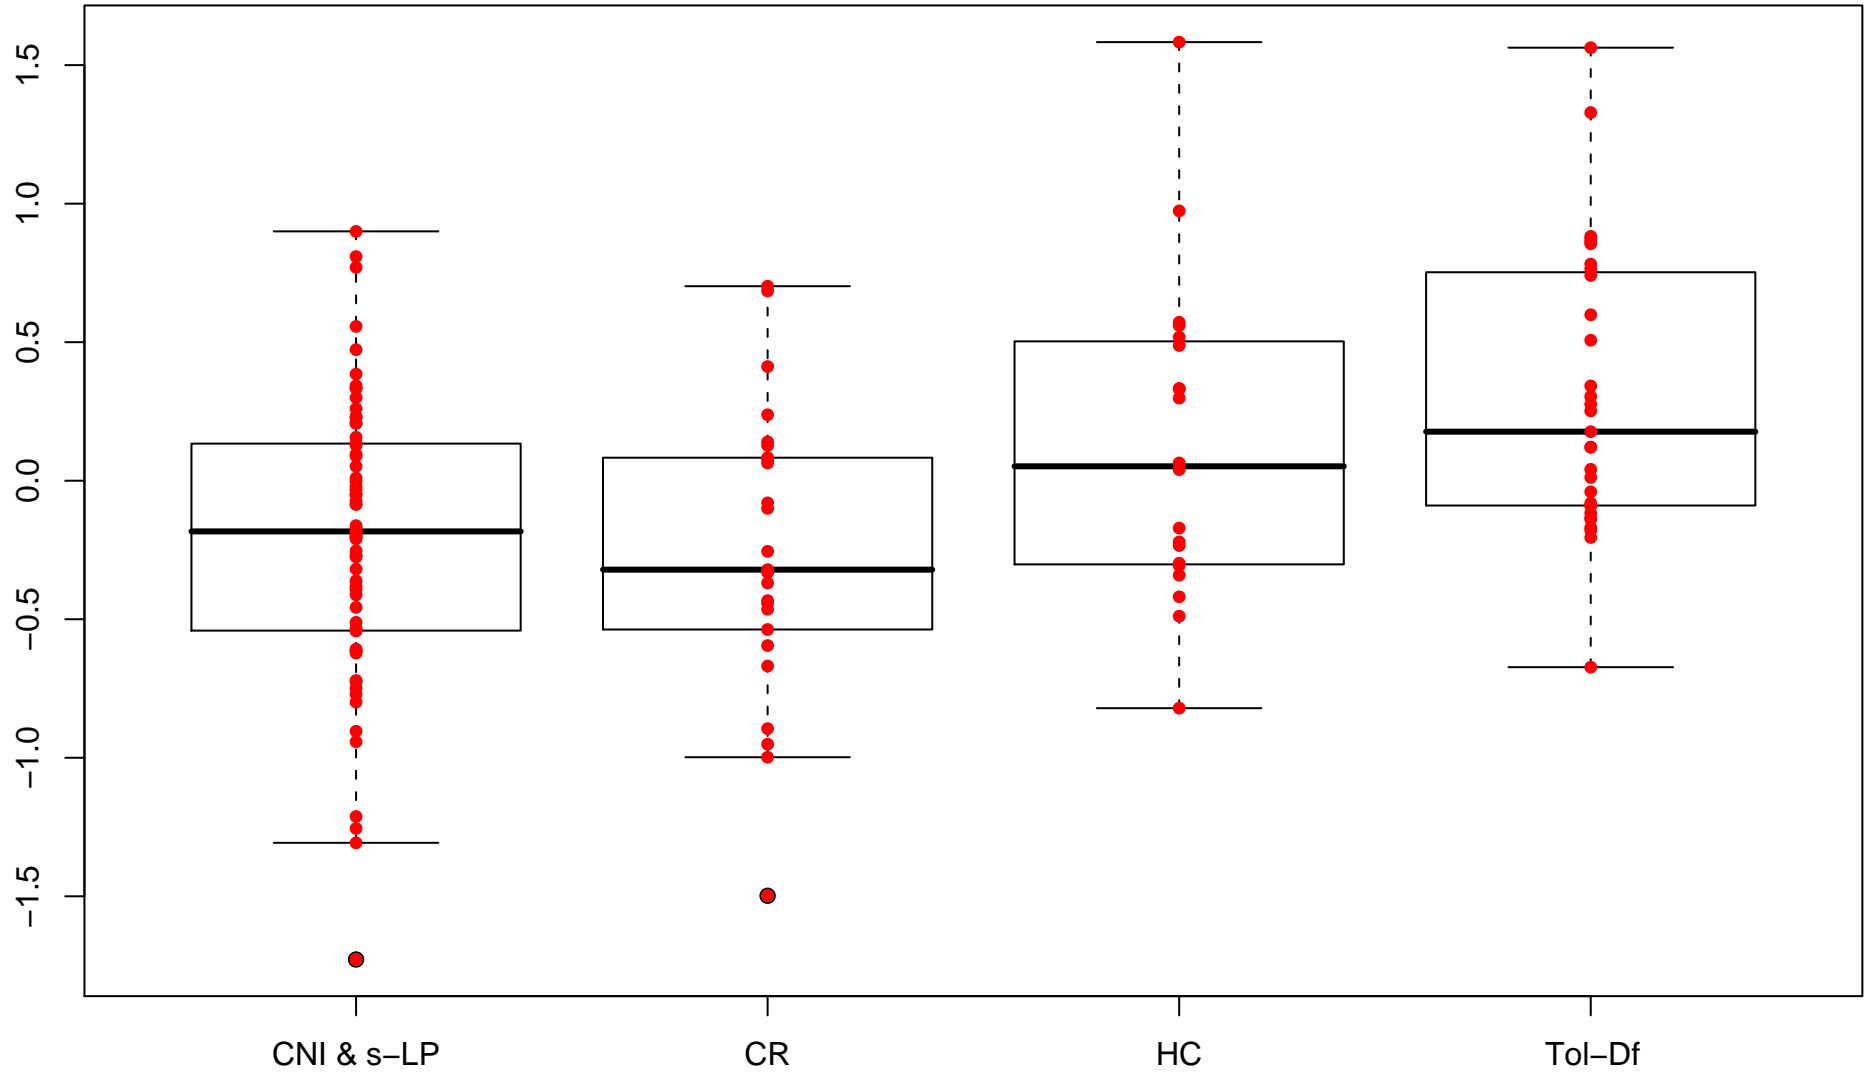

Rank 427 : DBI  
0.00013734

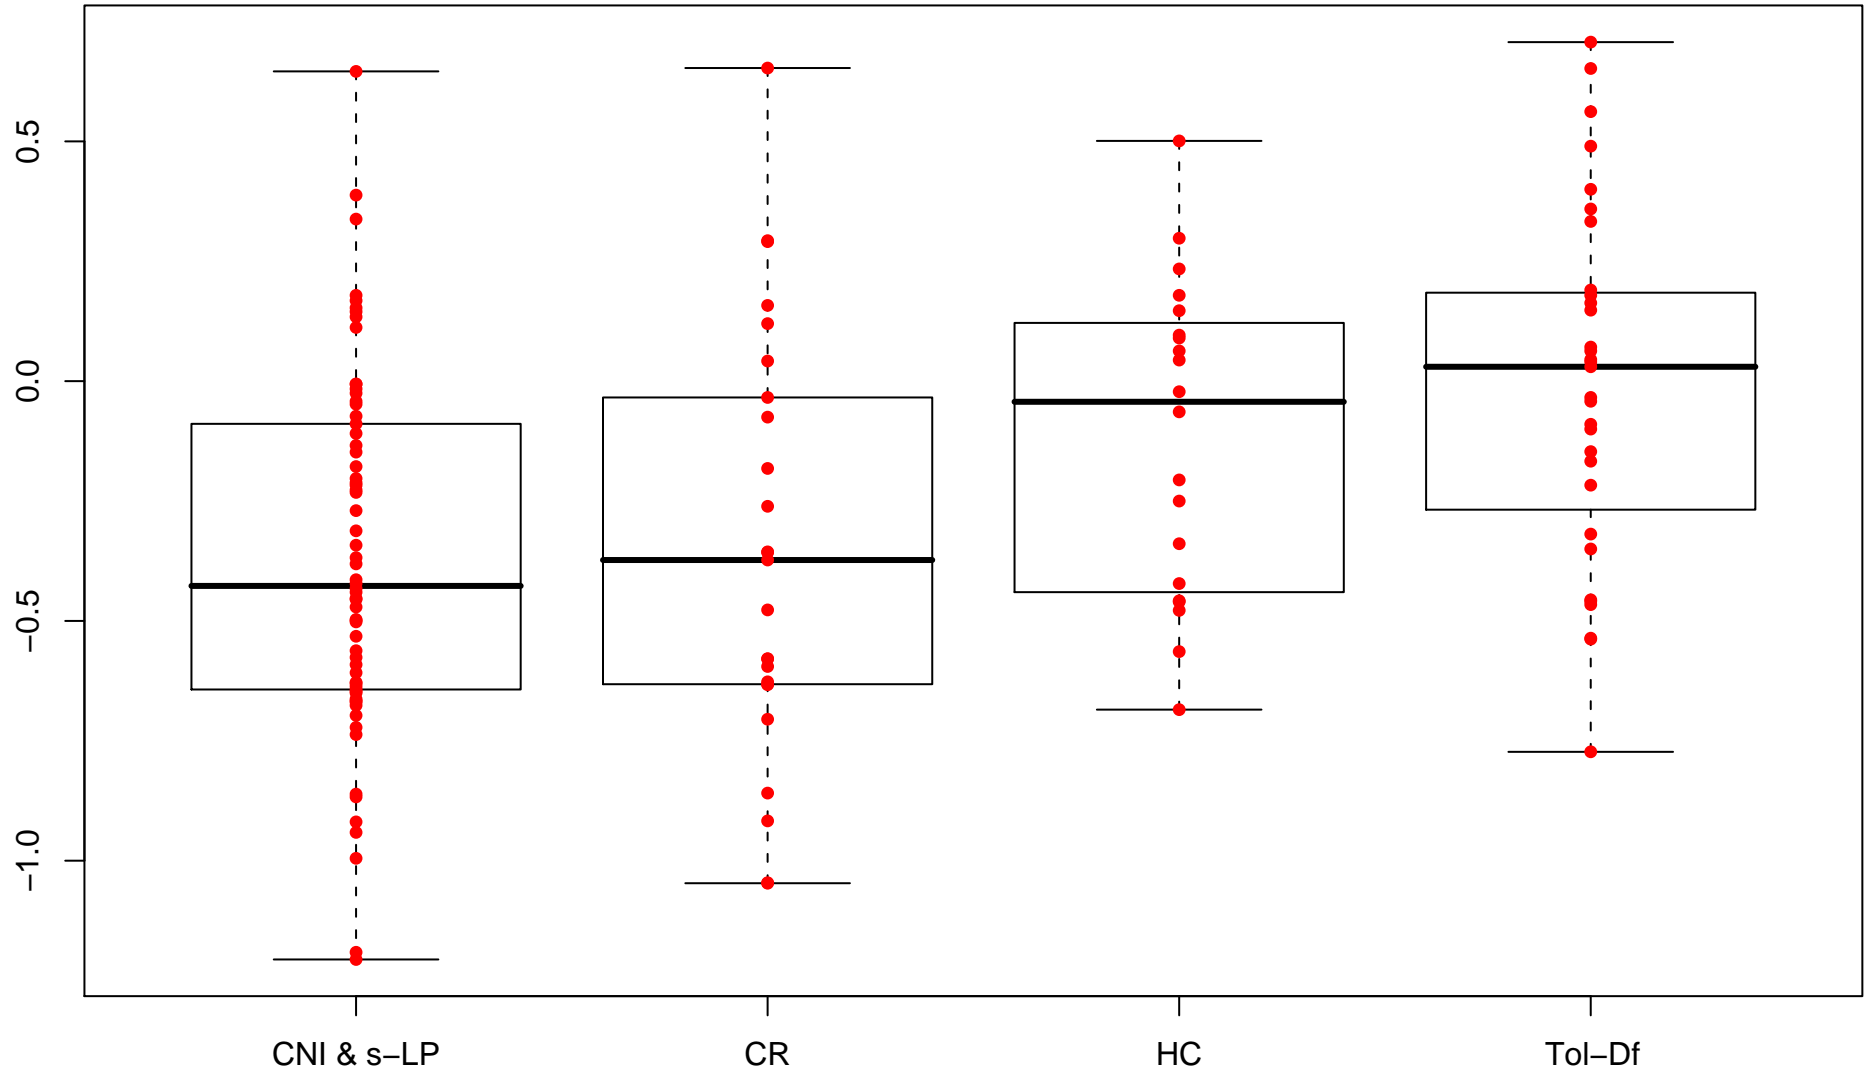

Rank 428 : B3GNT5  
0.00013812

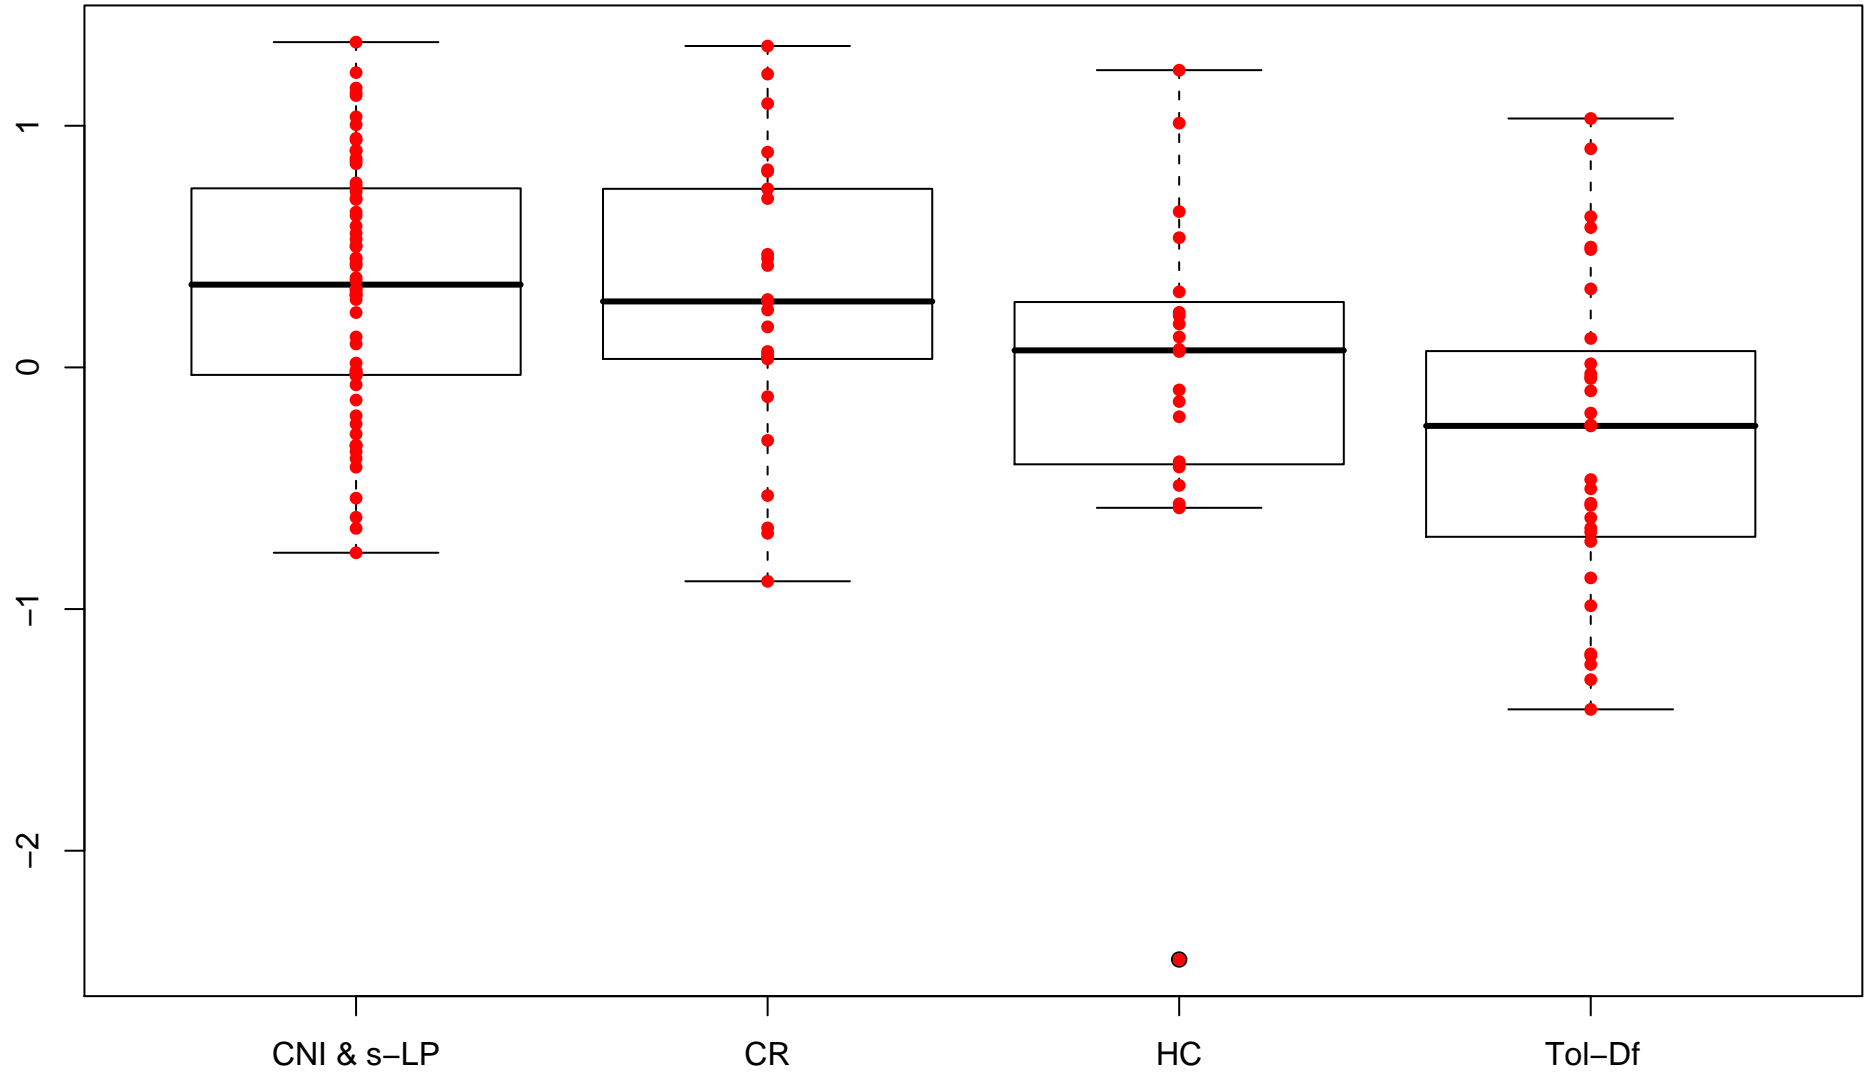

Rank 429 : C5ORF39  
0.0001408

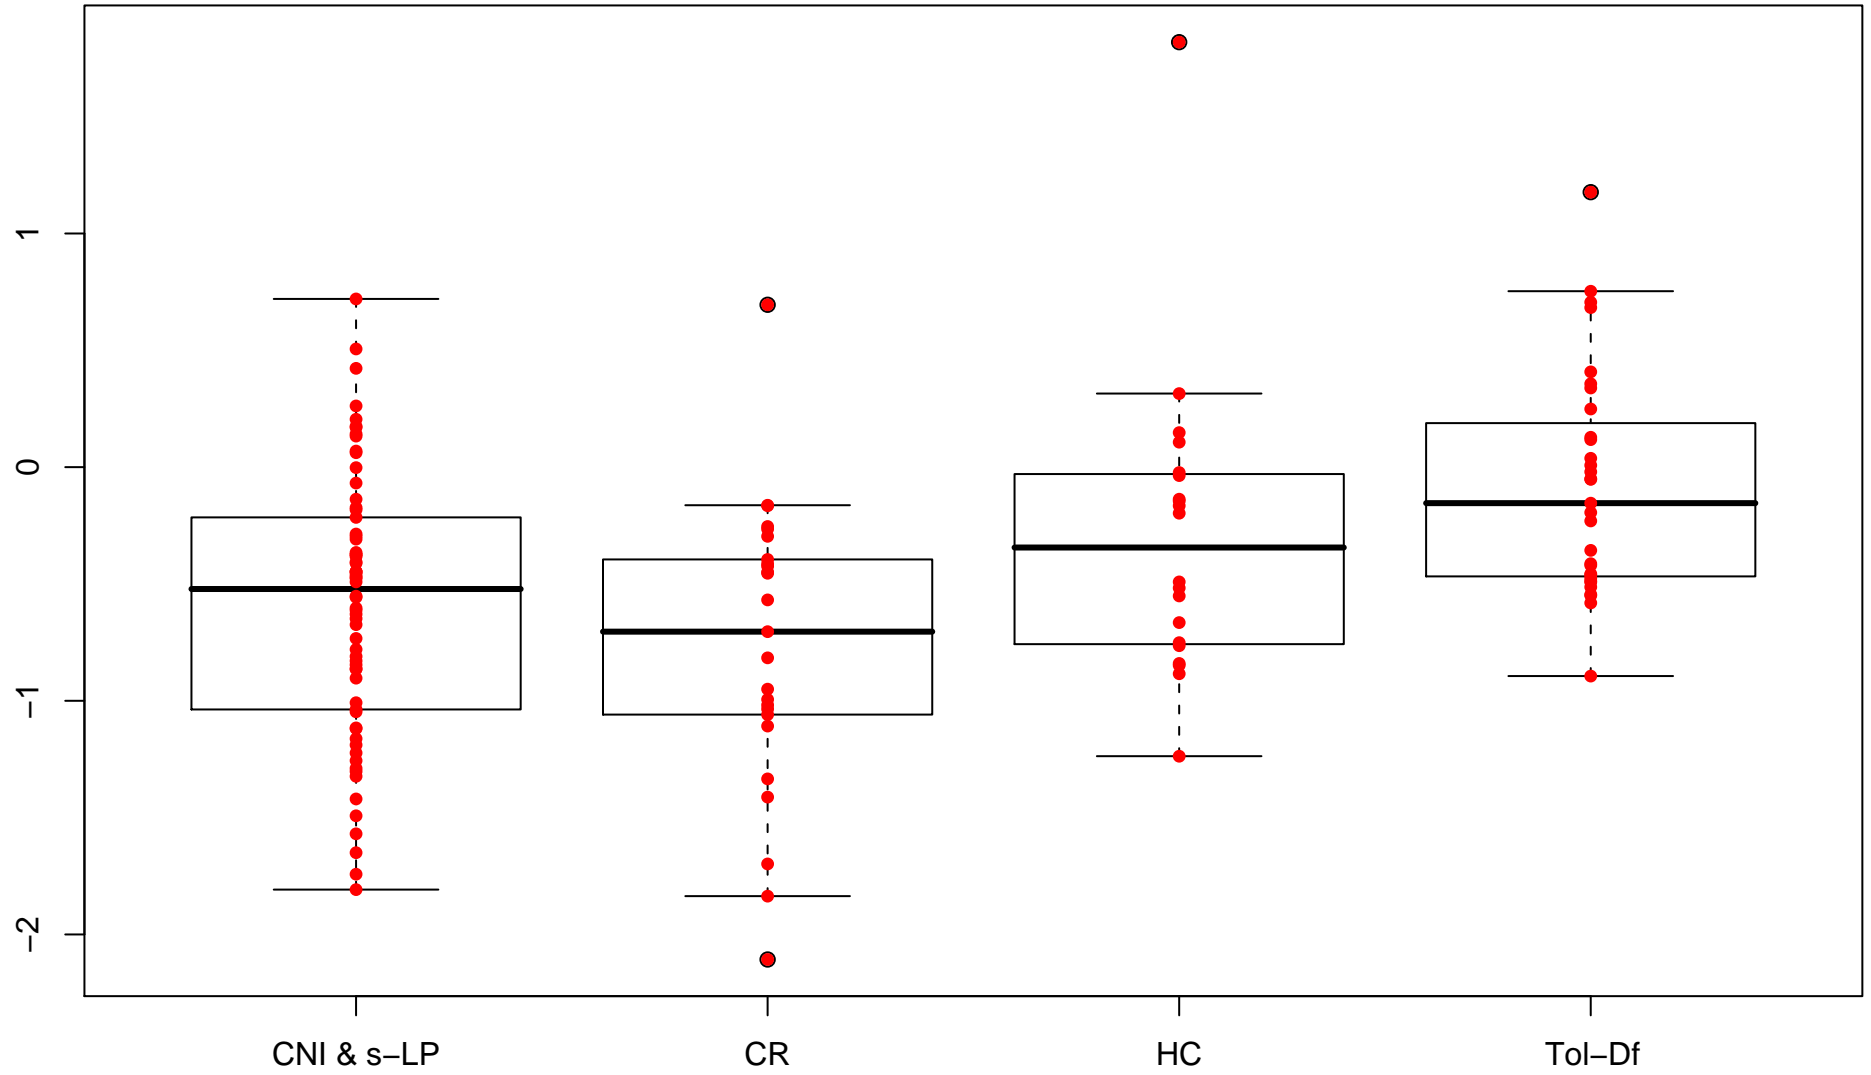

Rank 430 : EMR4  
0.00014104

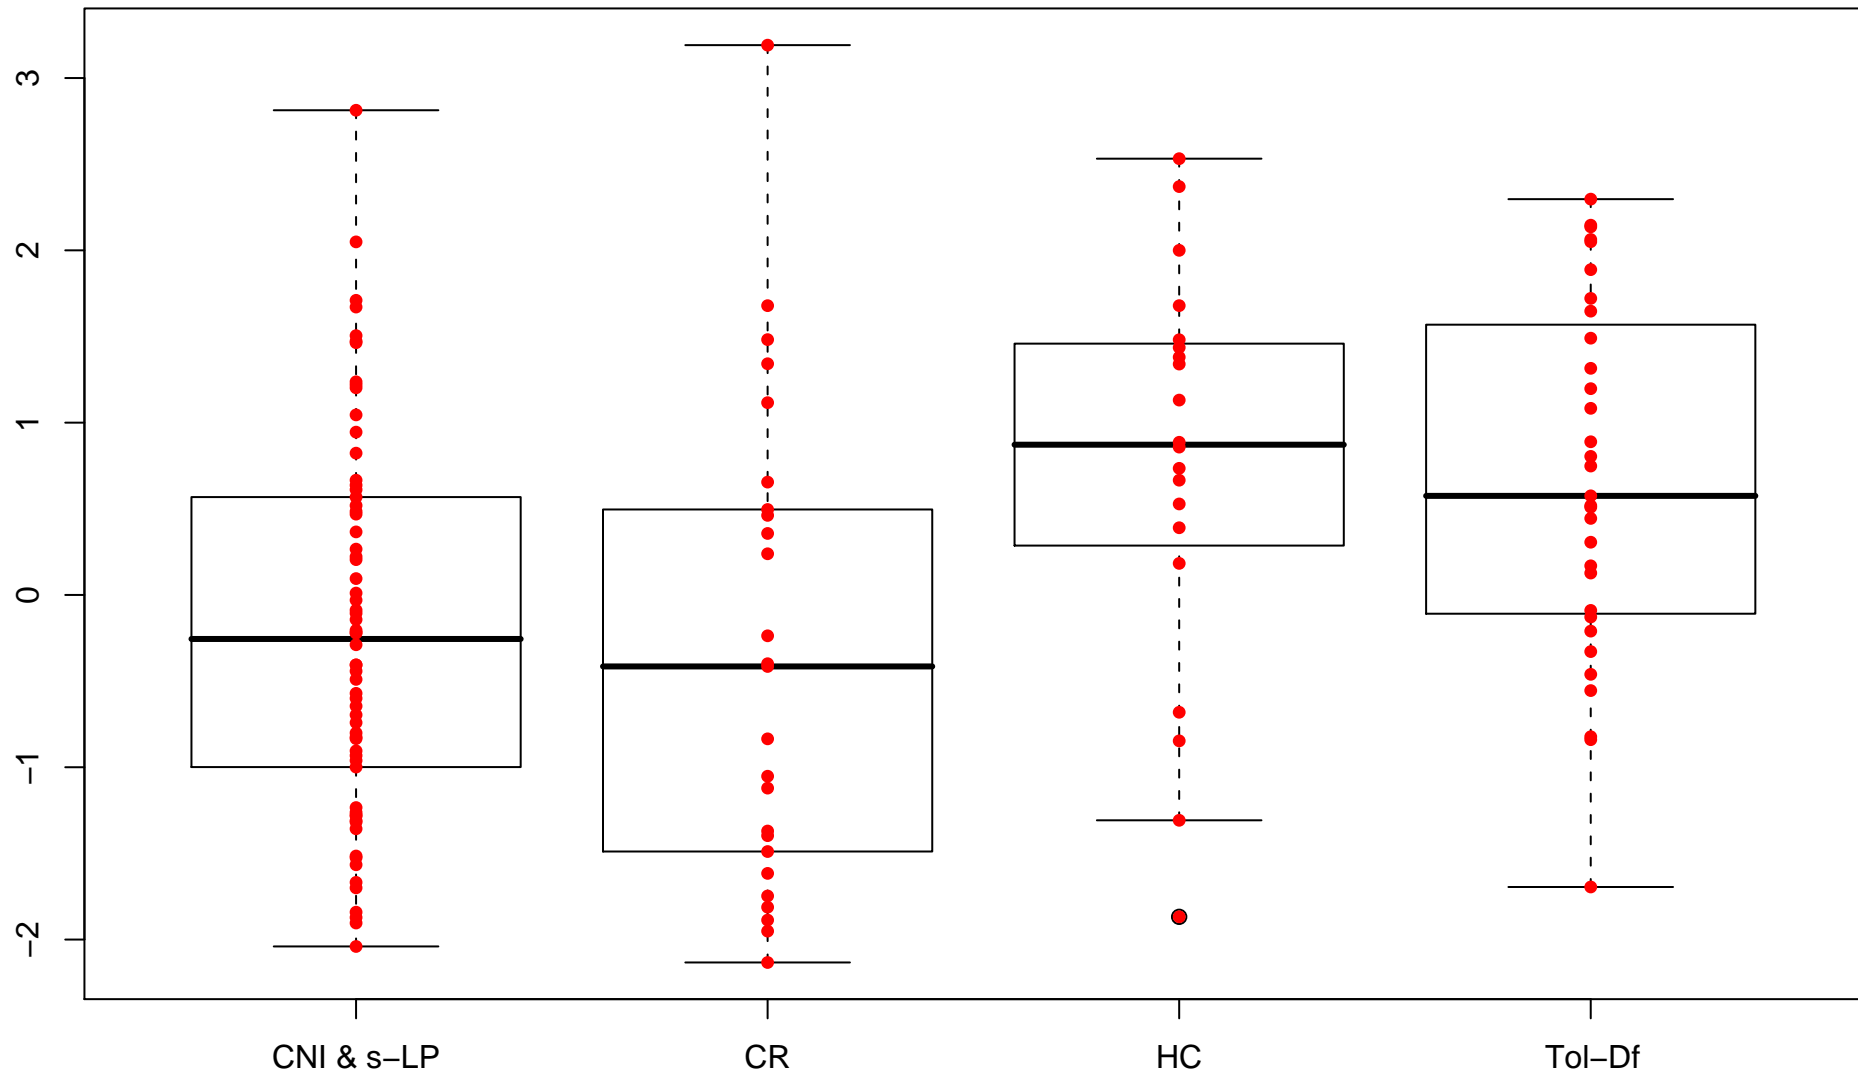

Rank 431 : ASF1A  
0.00014306

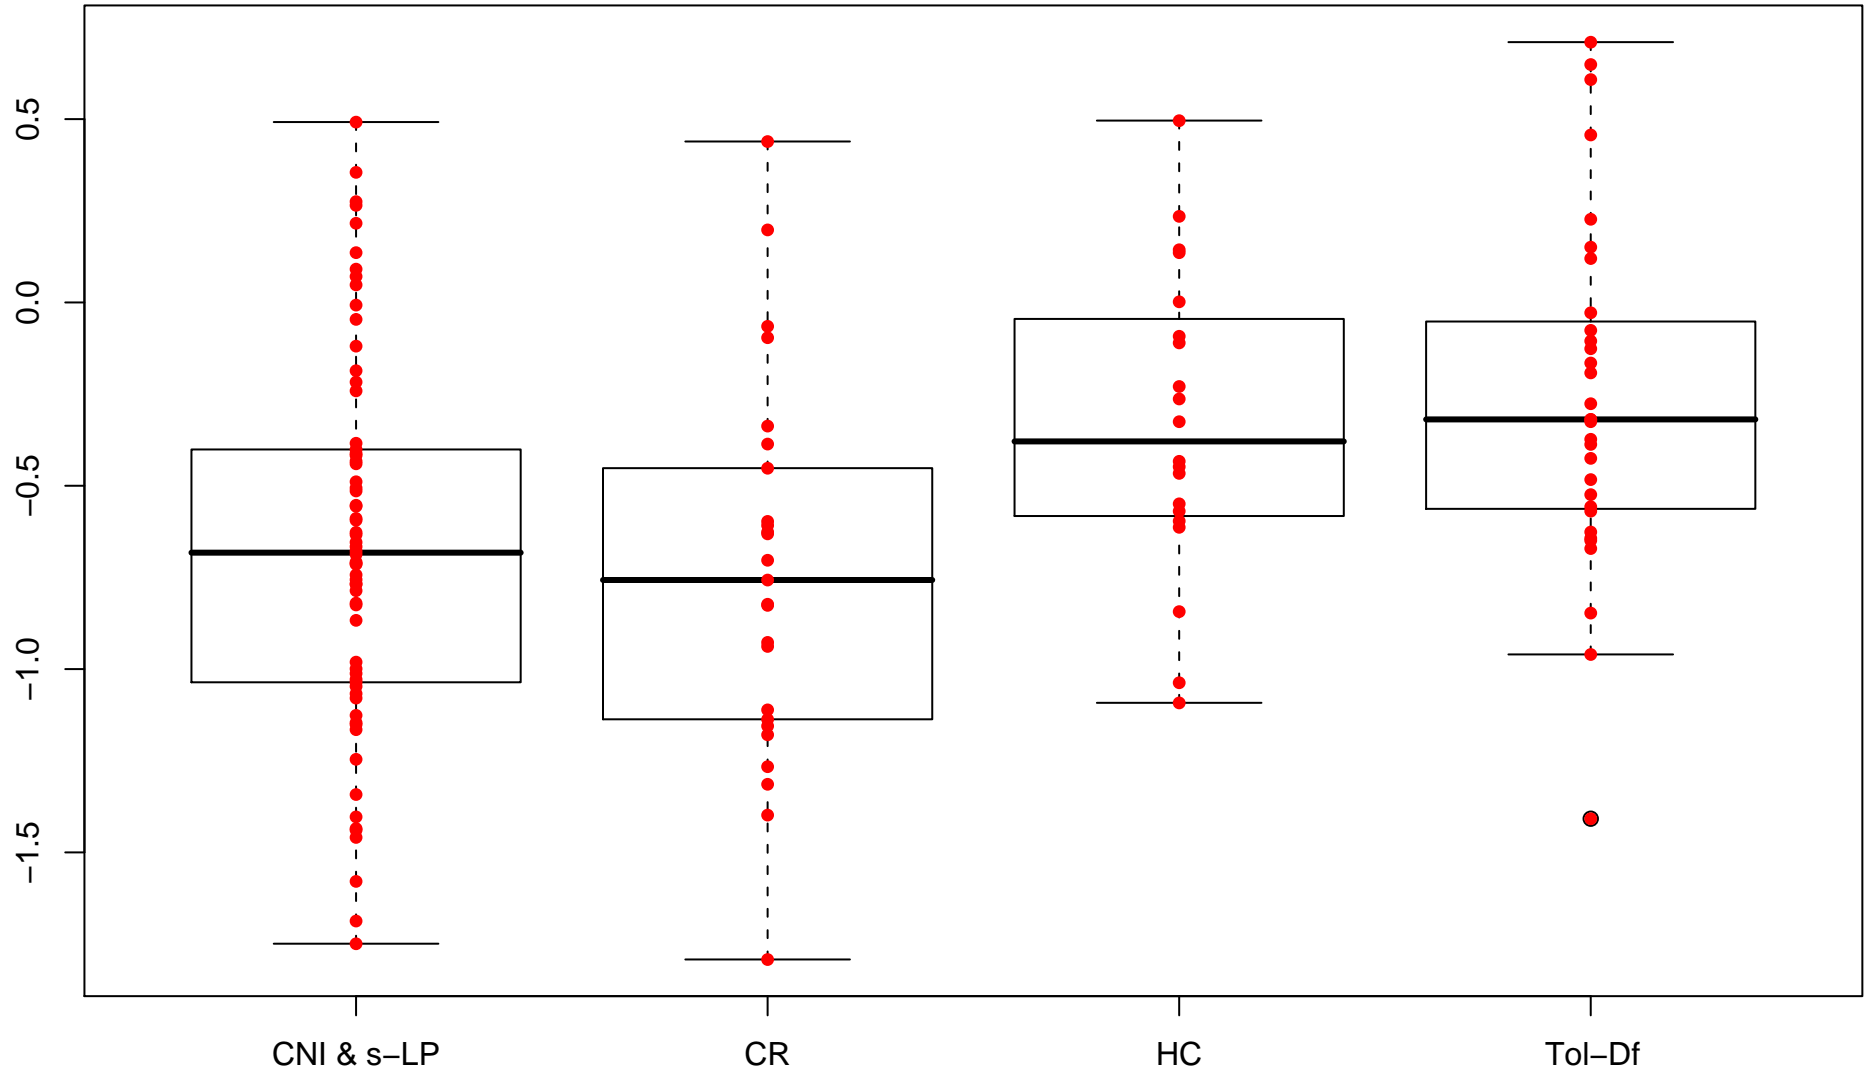



Rank 432 : FLJ36840  
0.00014354

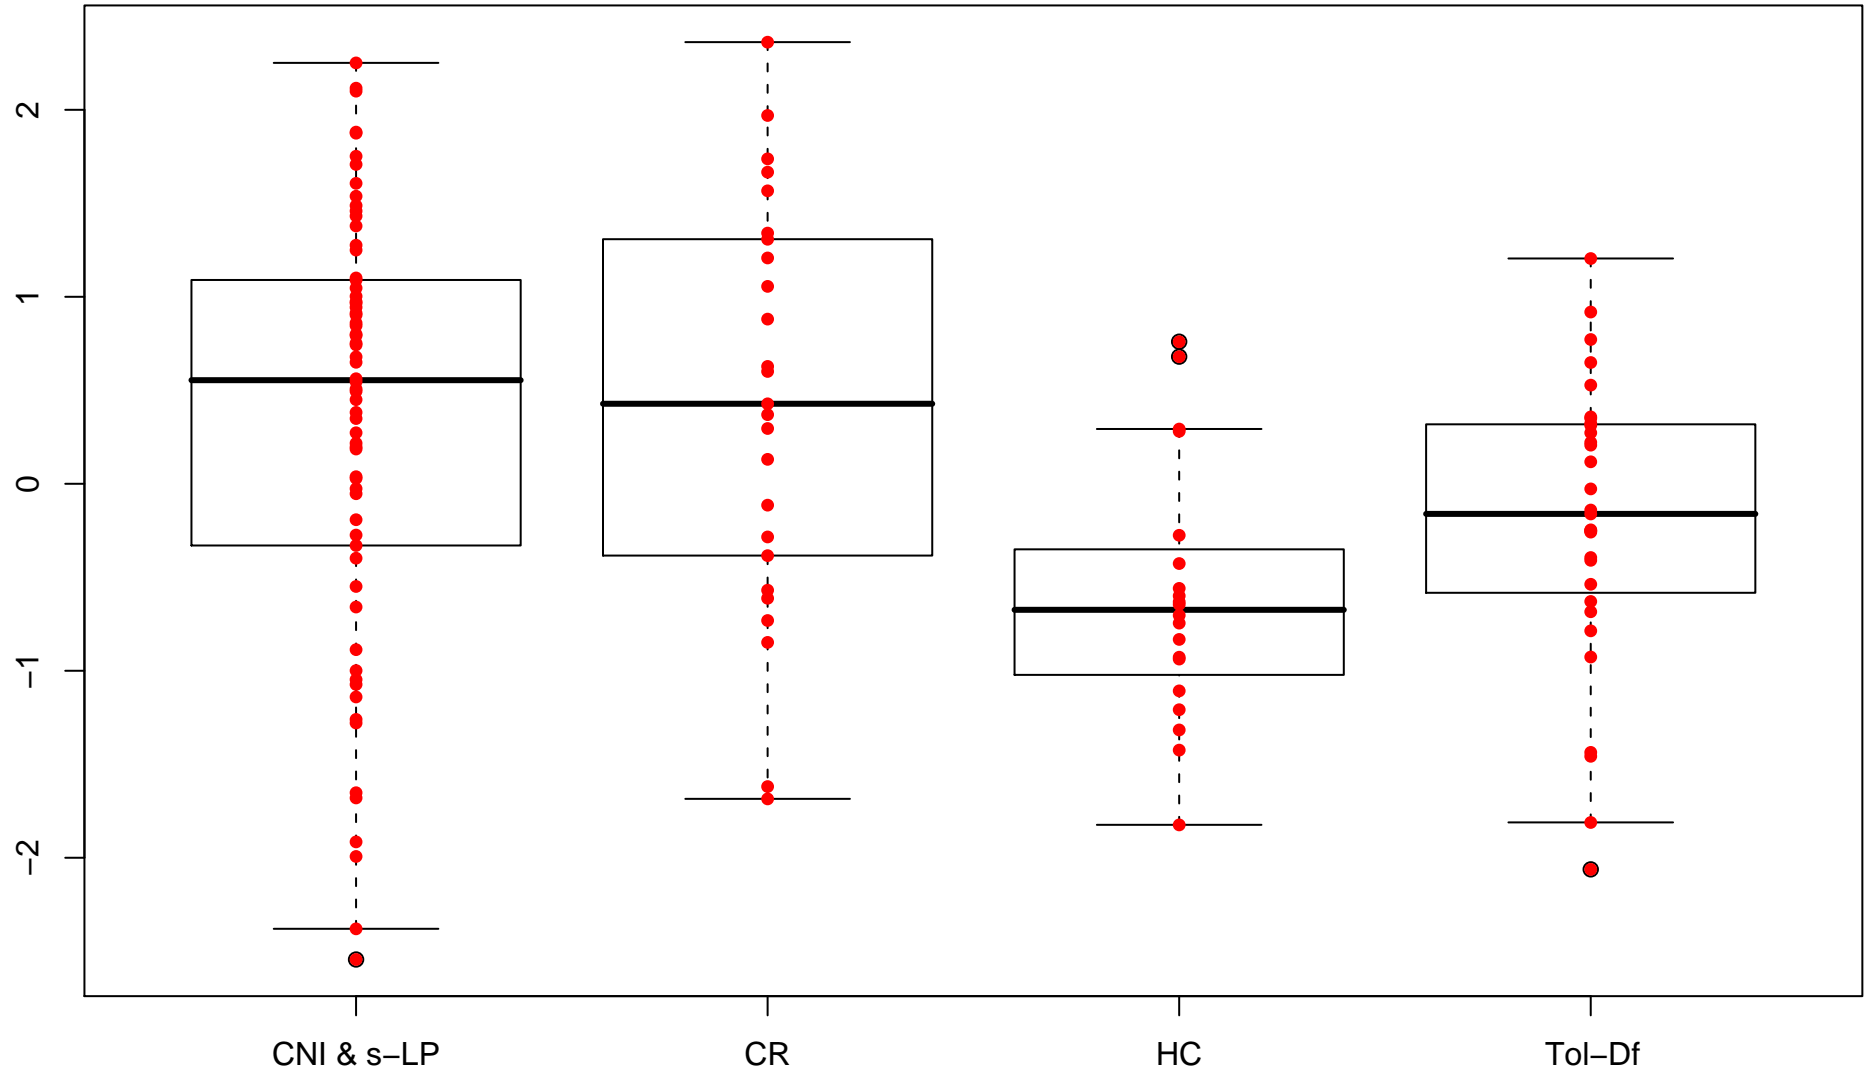

Rank 433 : PDCD6  
0.00014419

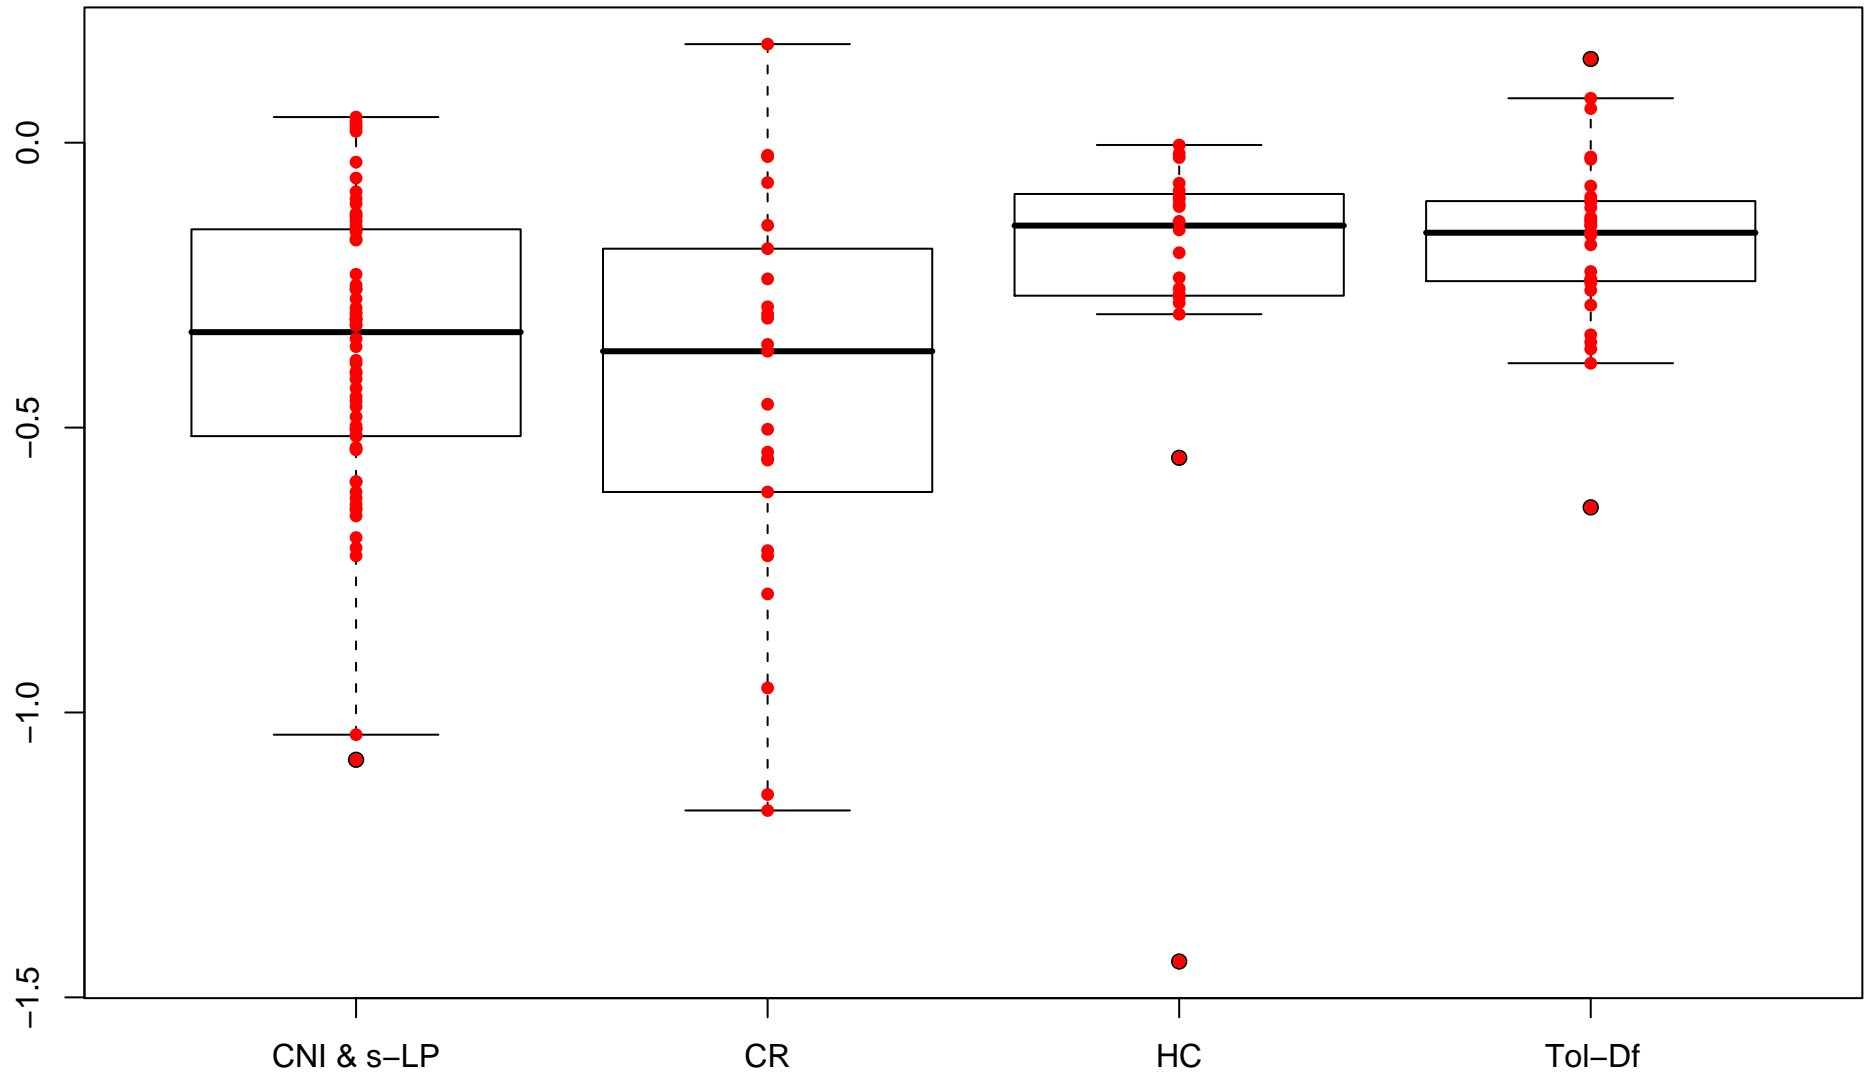

Rank 434 : SRXN1  
0.00014549

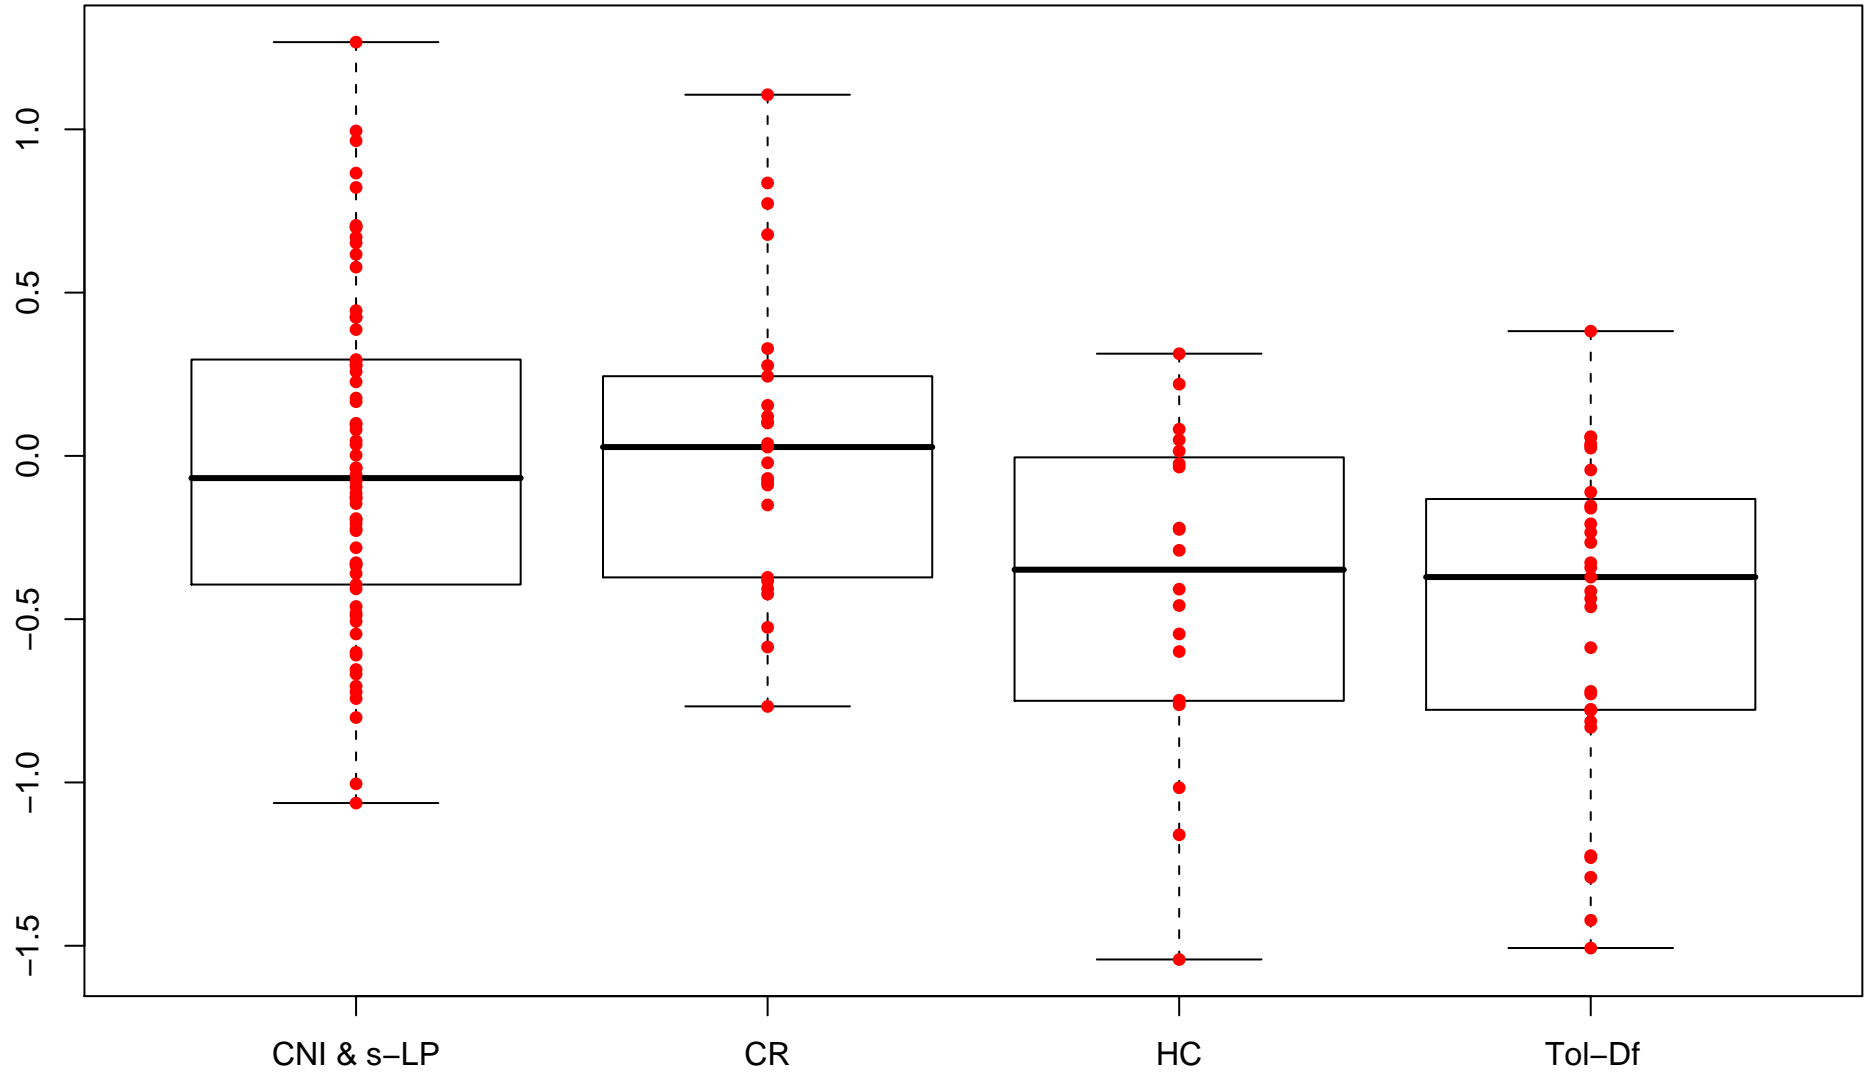

Rank 435 : RP2  
0.00014725

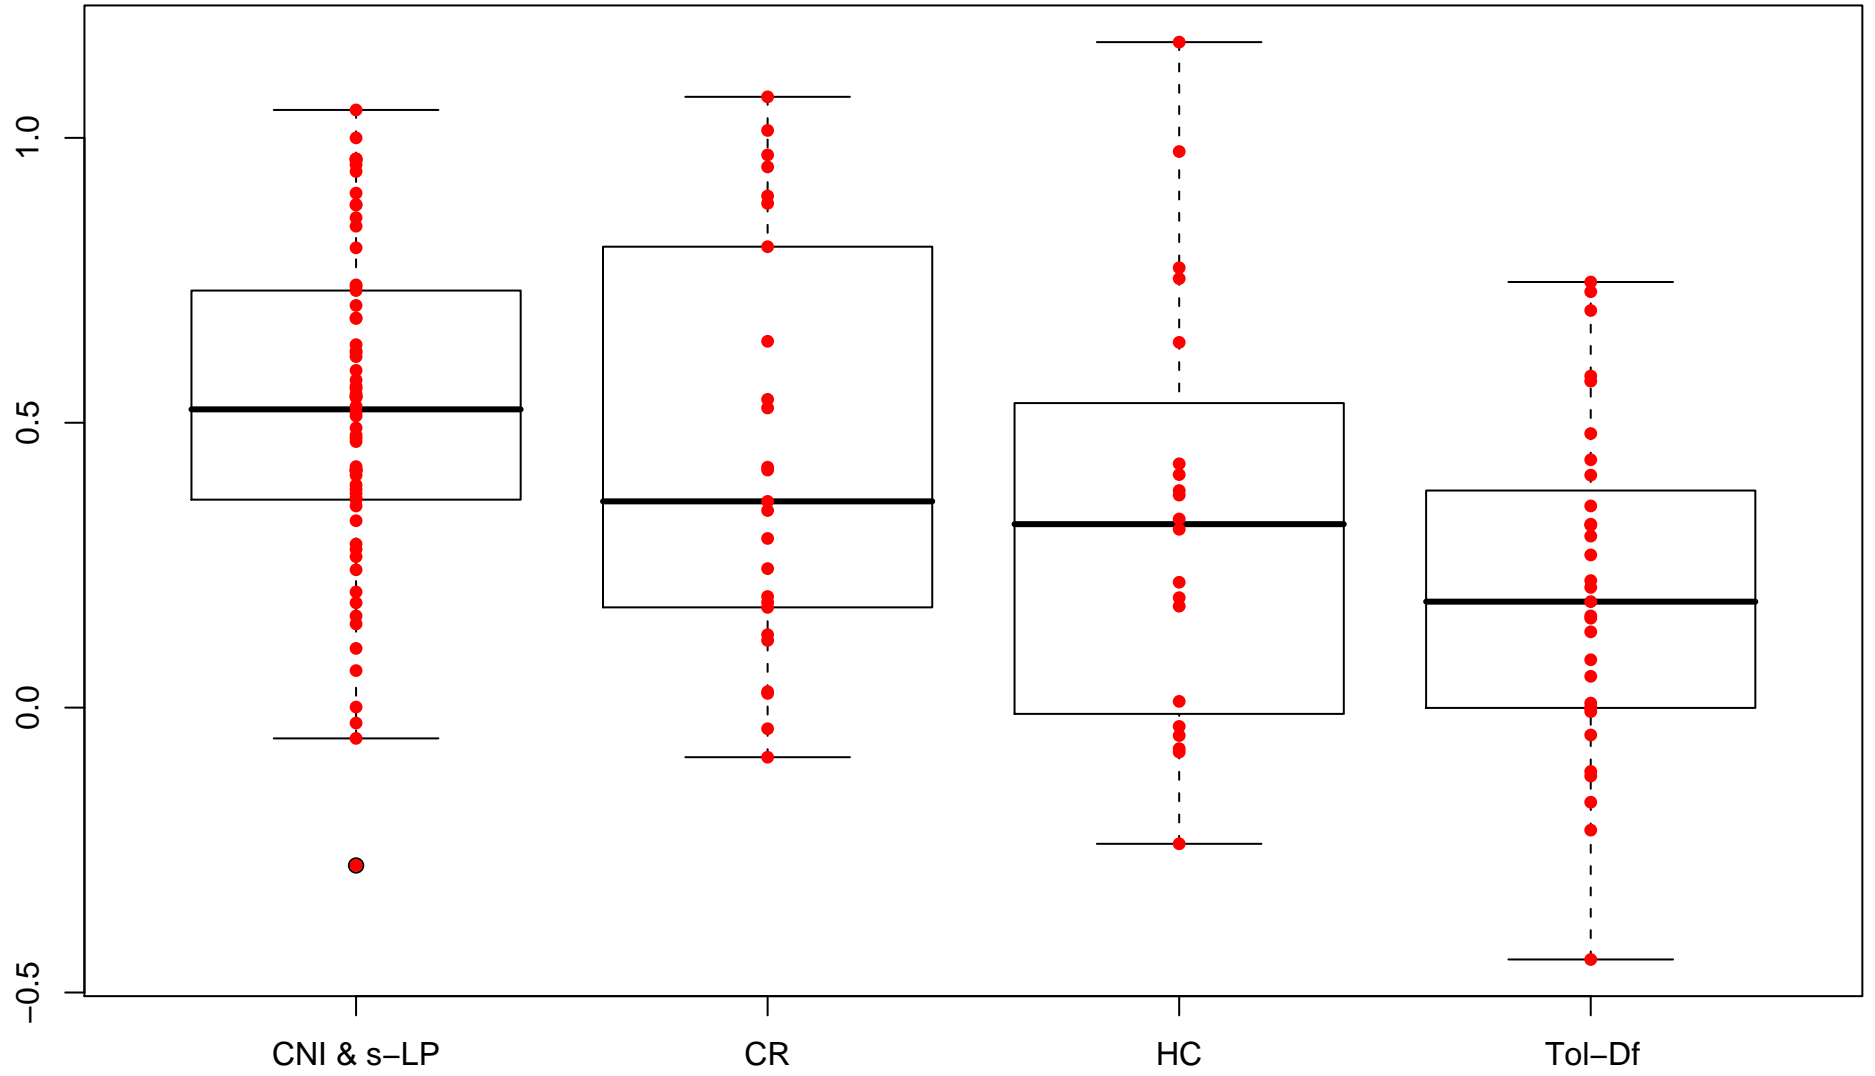

Rank 436 : C1QBP  
0.00014762

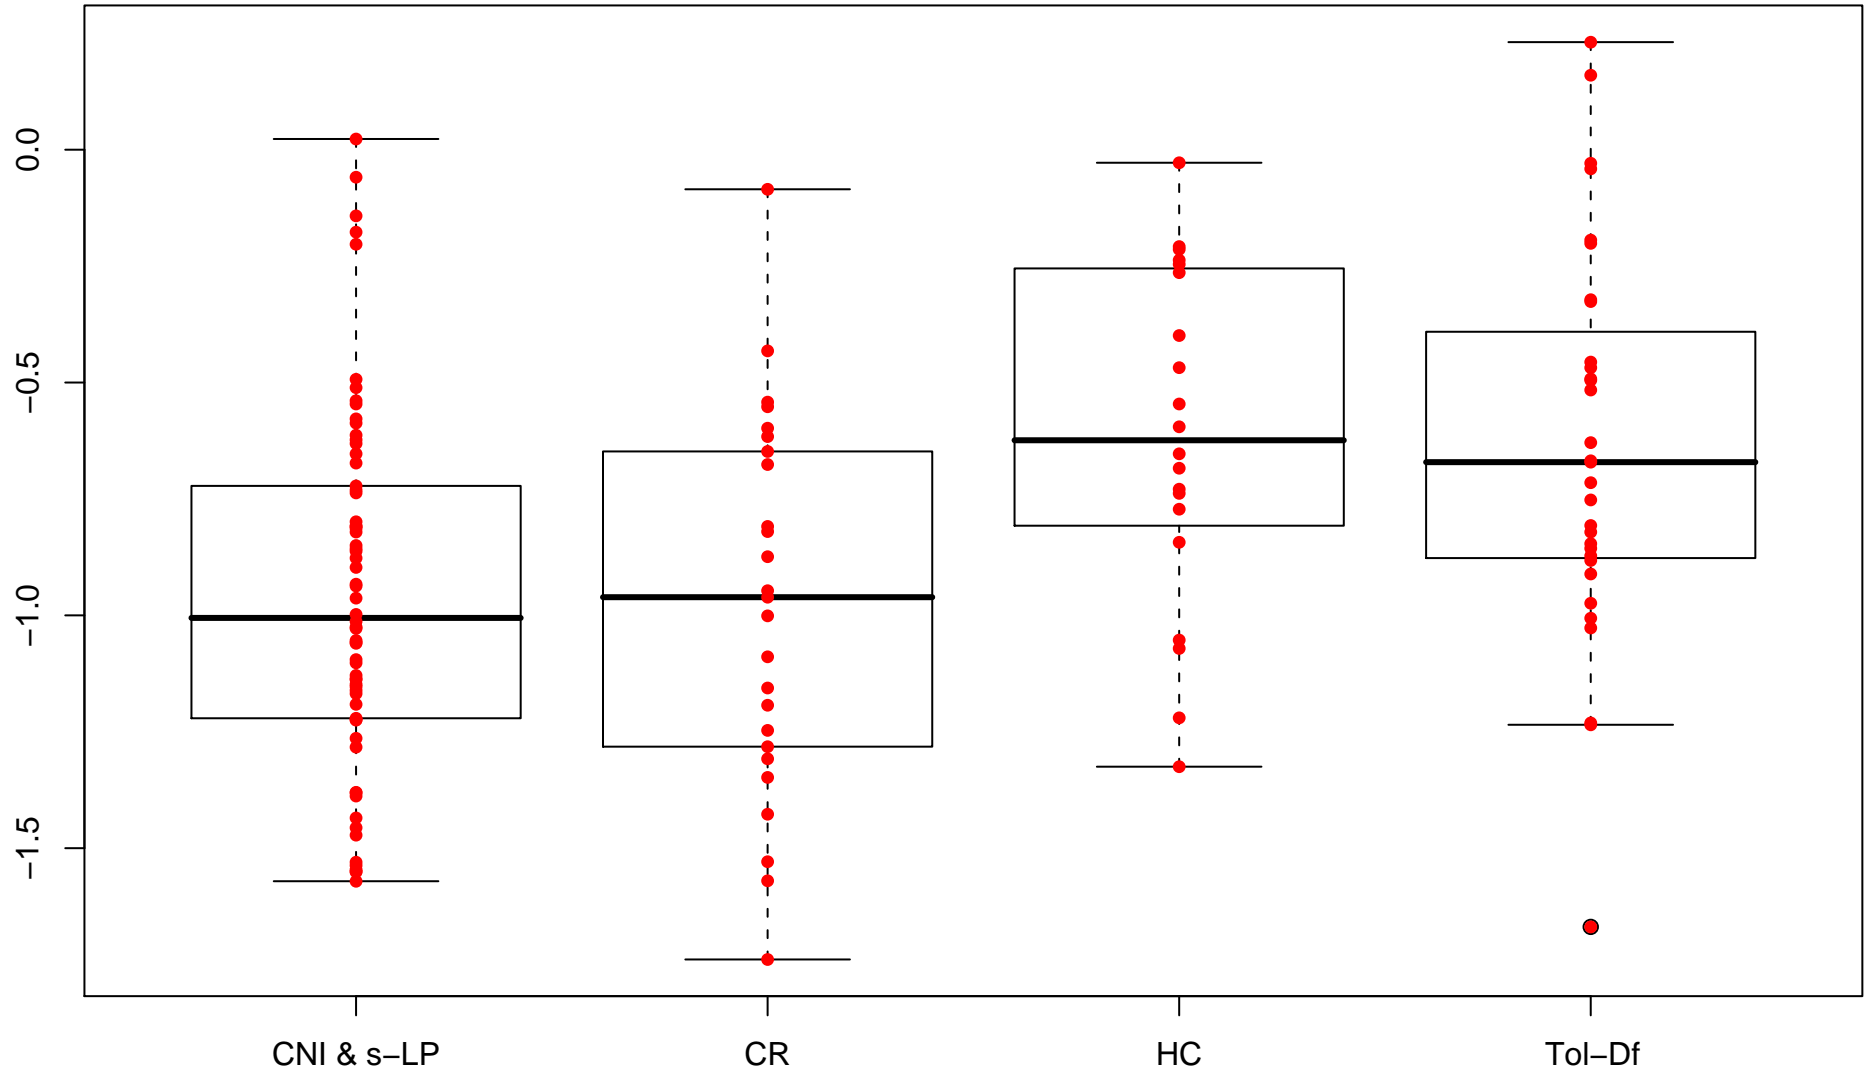

Rank 437 : FLJ32866  
0.00014781

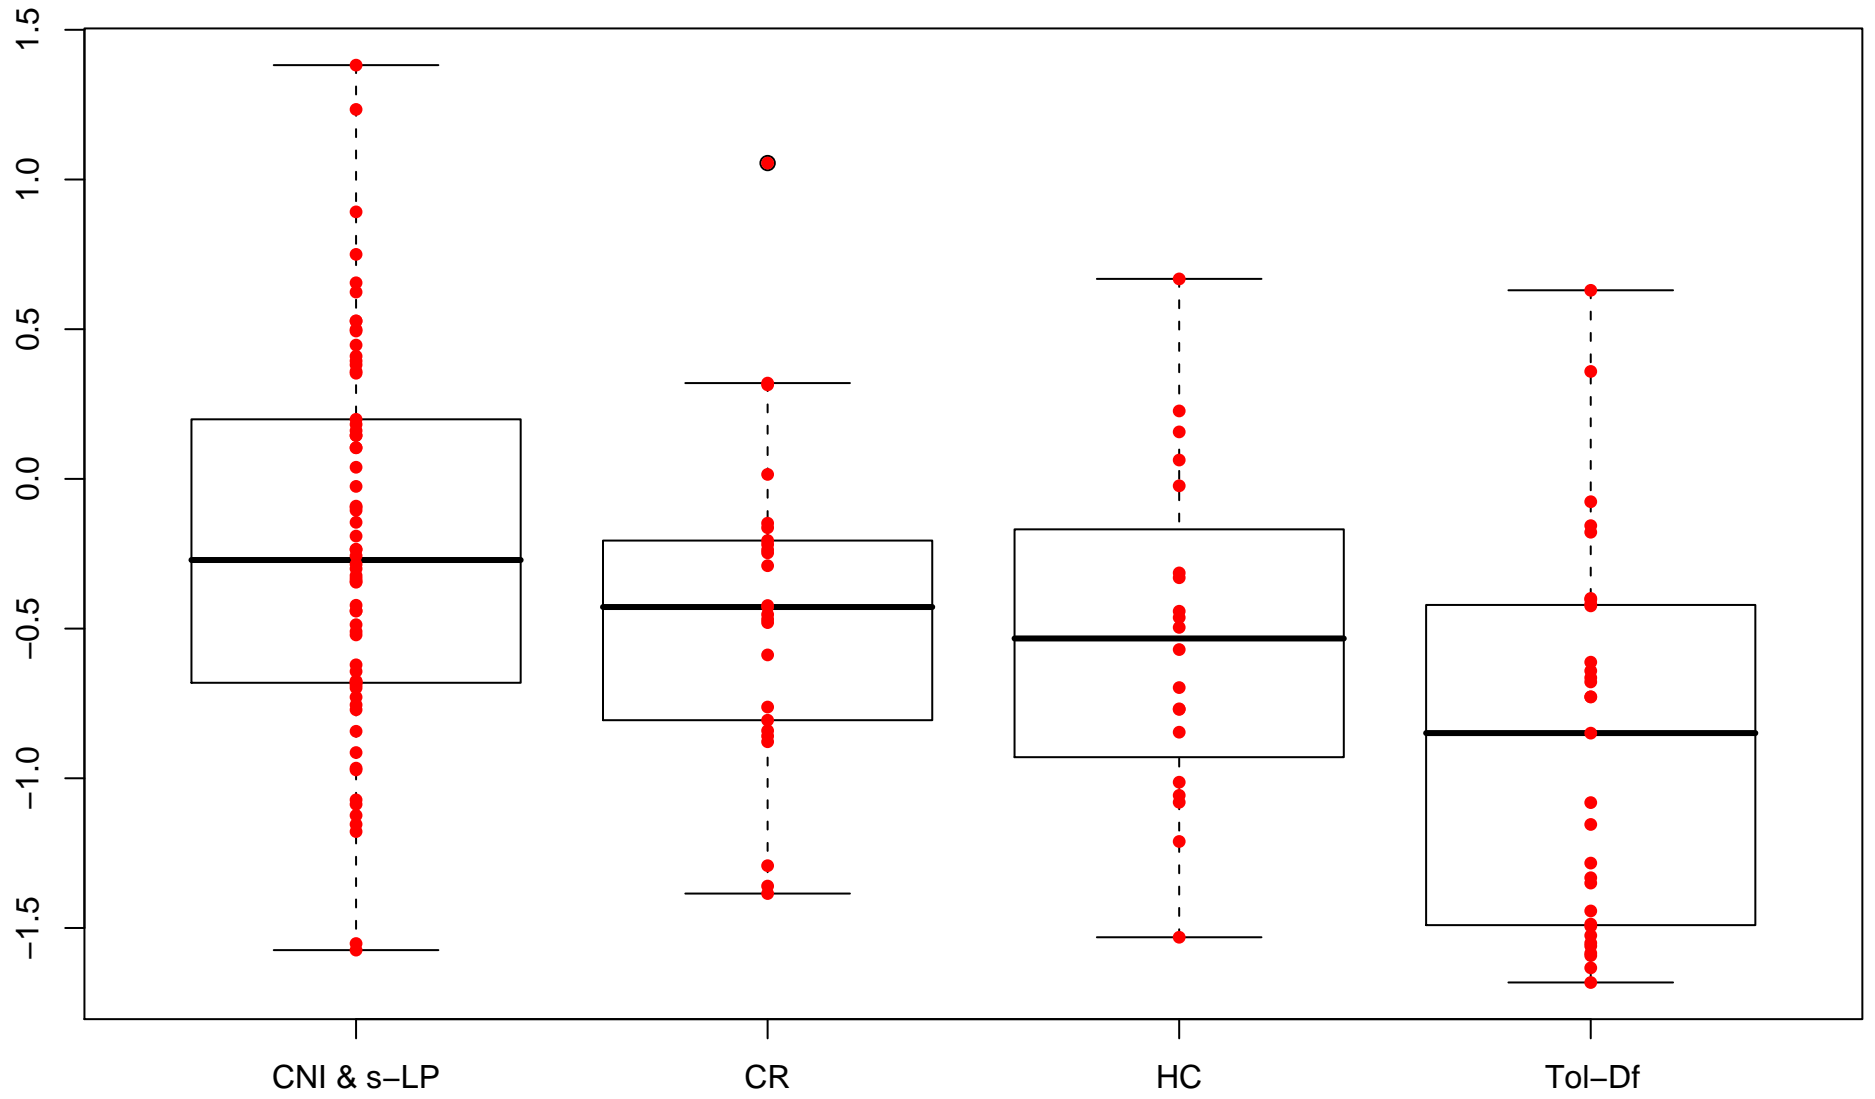

Rank 438 : CCRL2;LOC727811  
0.00014794

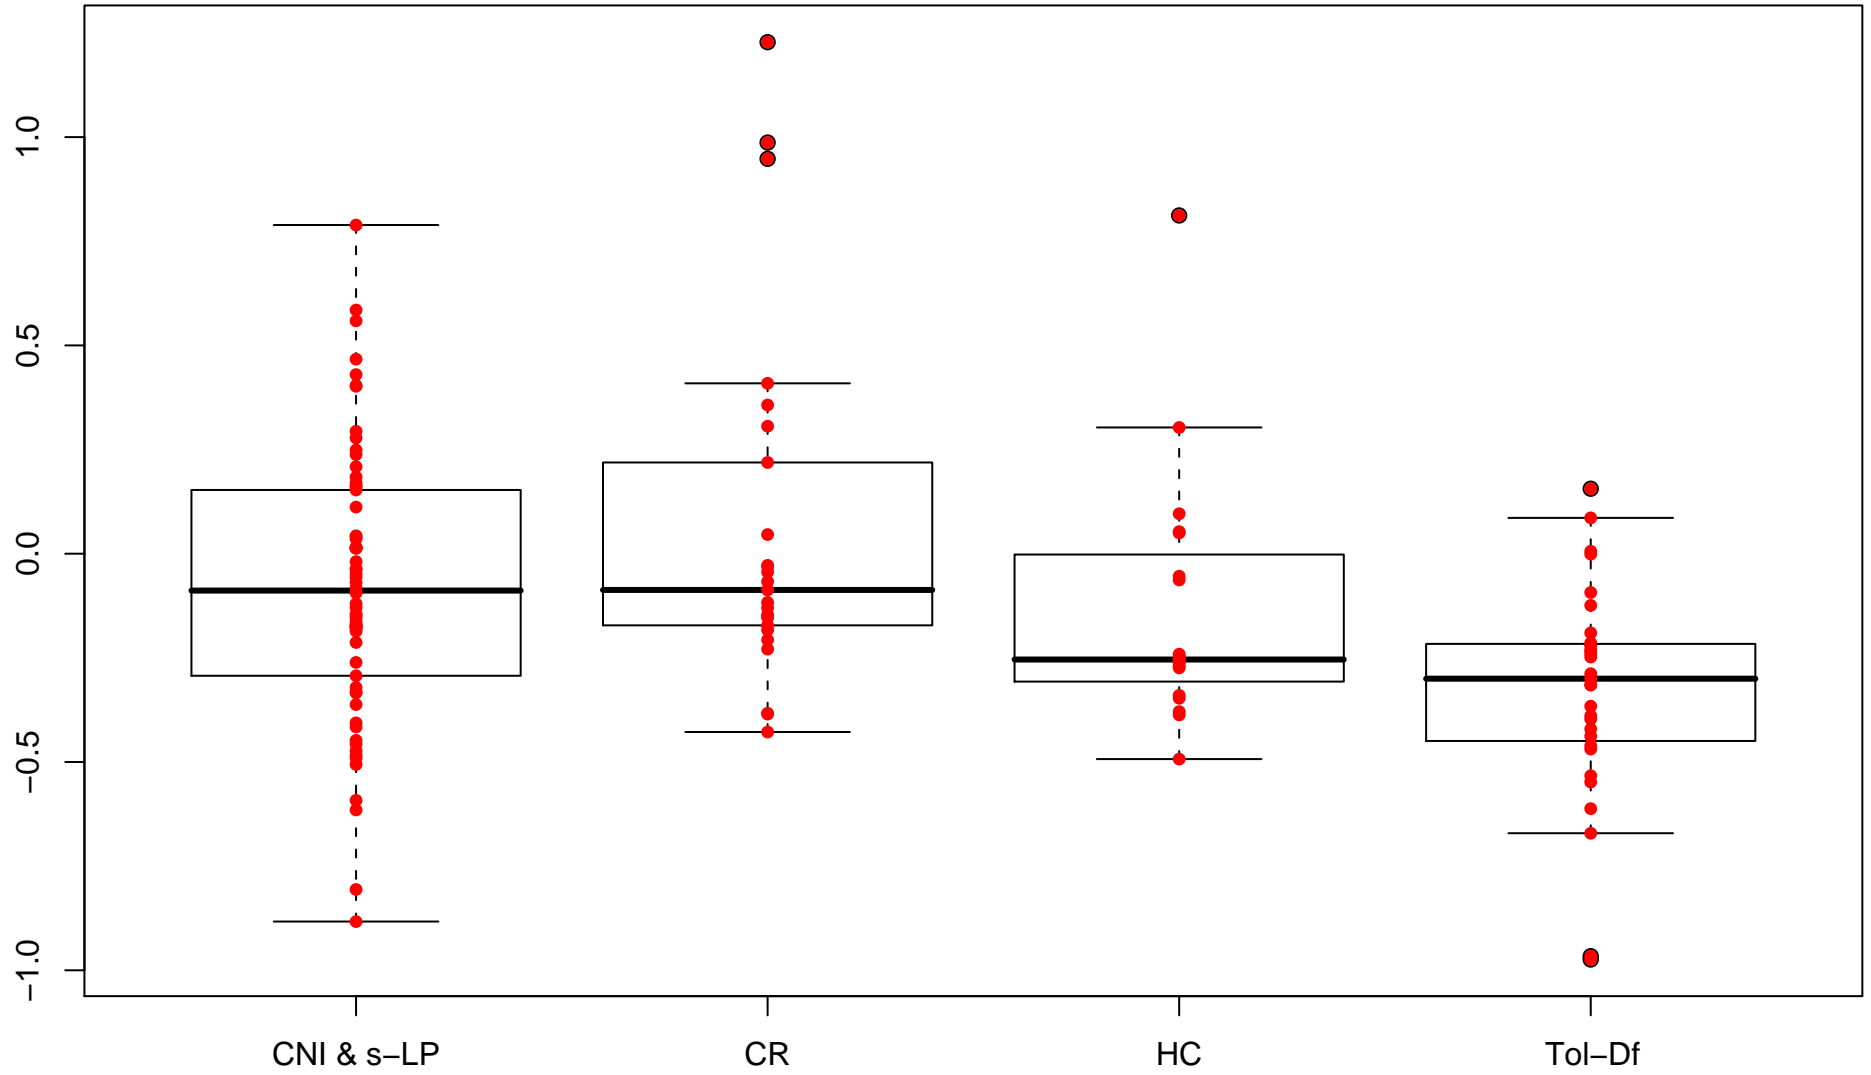

Rank 439 : RHCE;RHD  
0.00015363

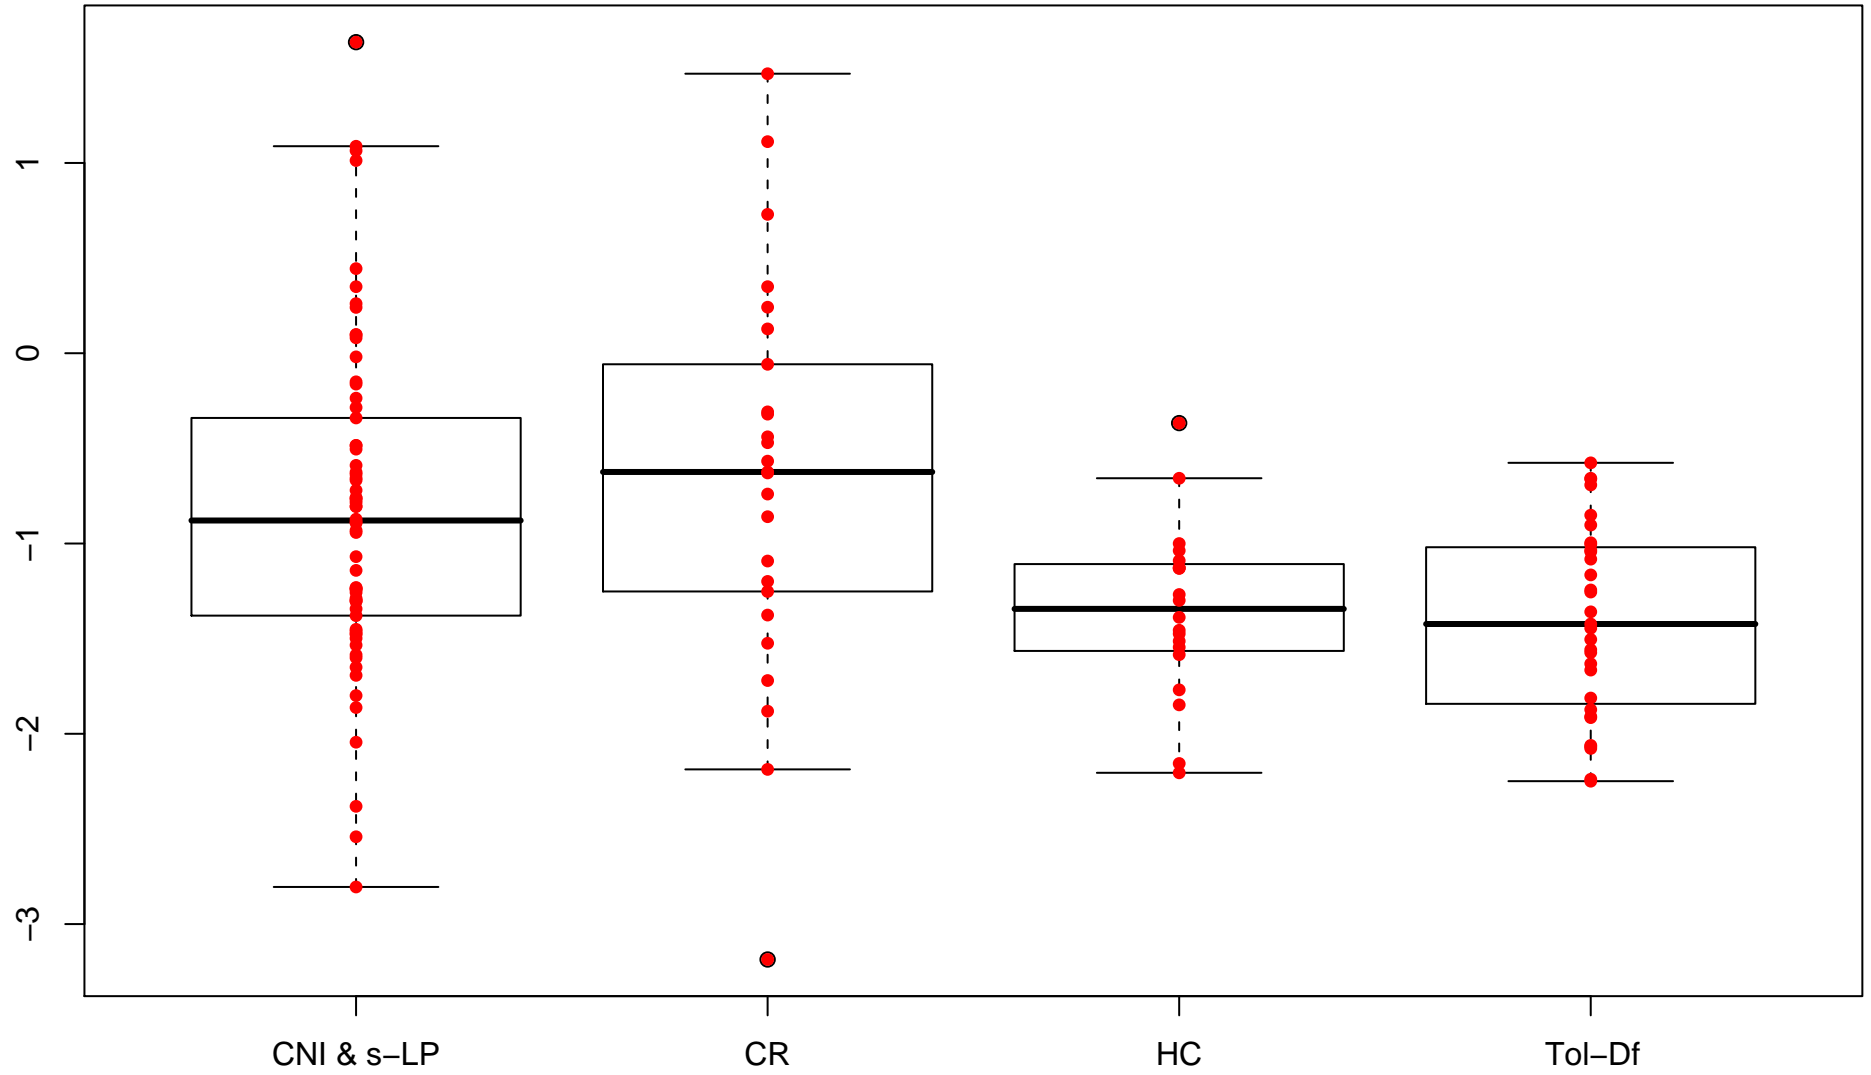



Rank 440 : MTA3  
0.000155

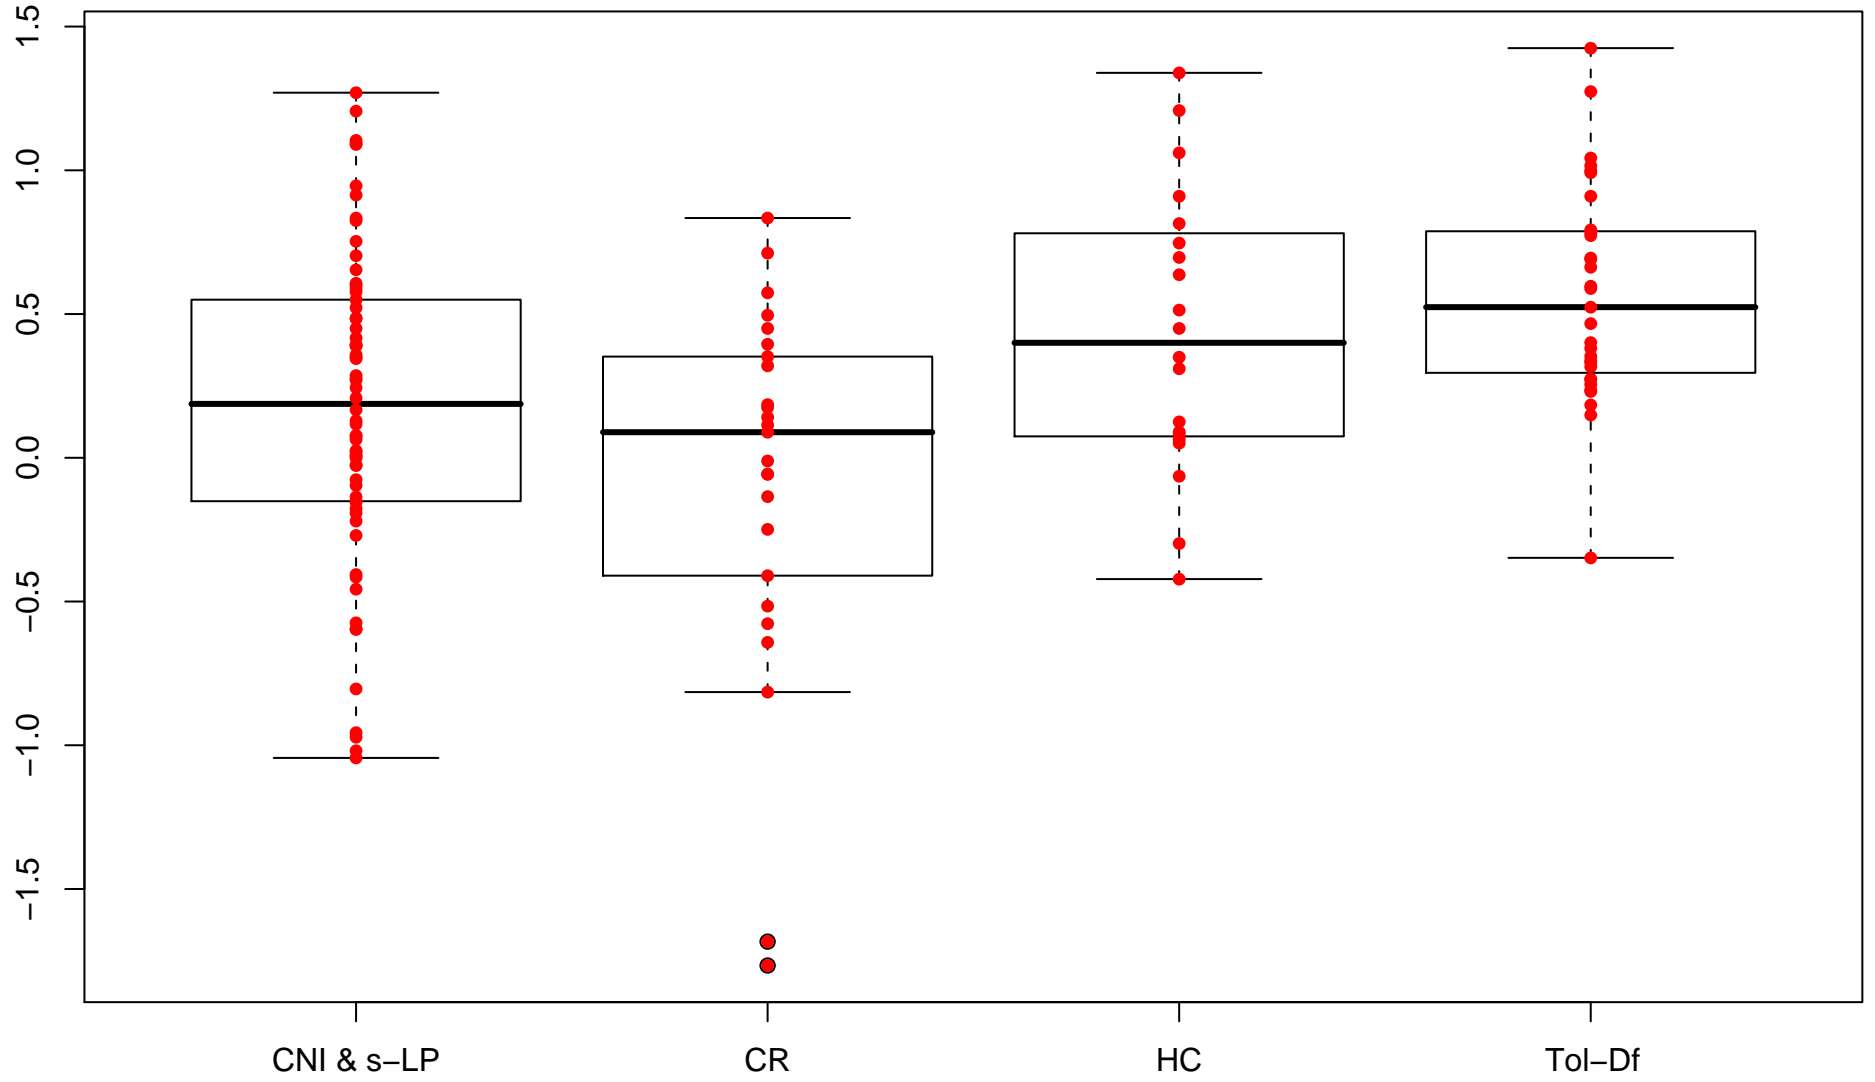

Rank 441 : CST7  
0.00015569

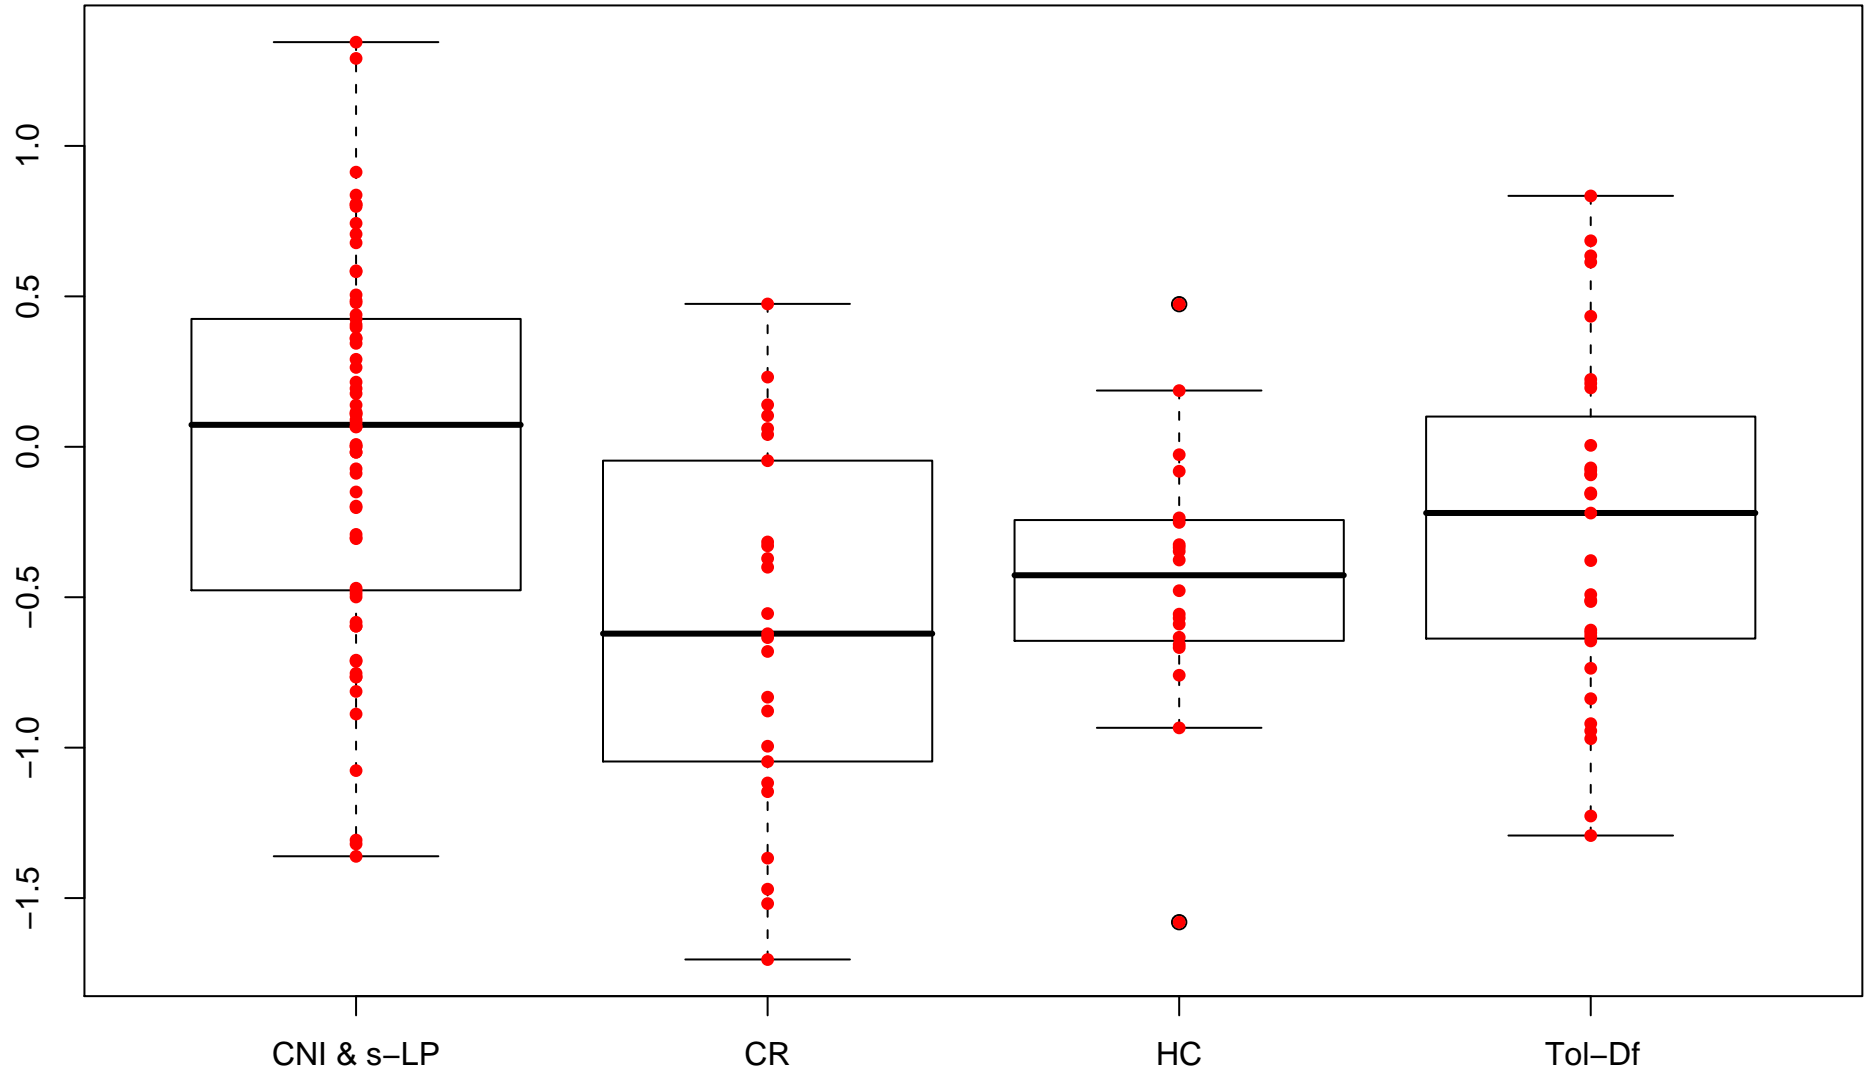

Rank 442 : CCT2  
0.00015672

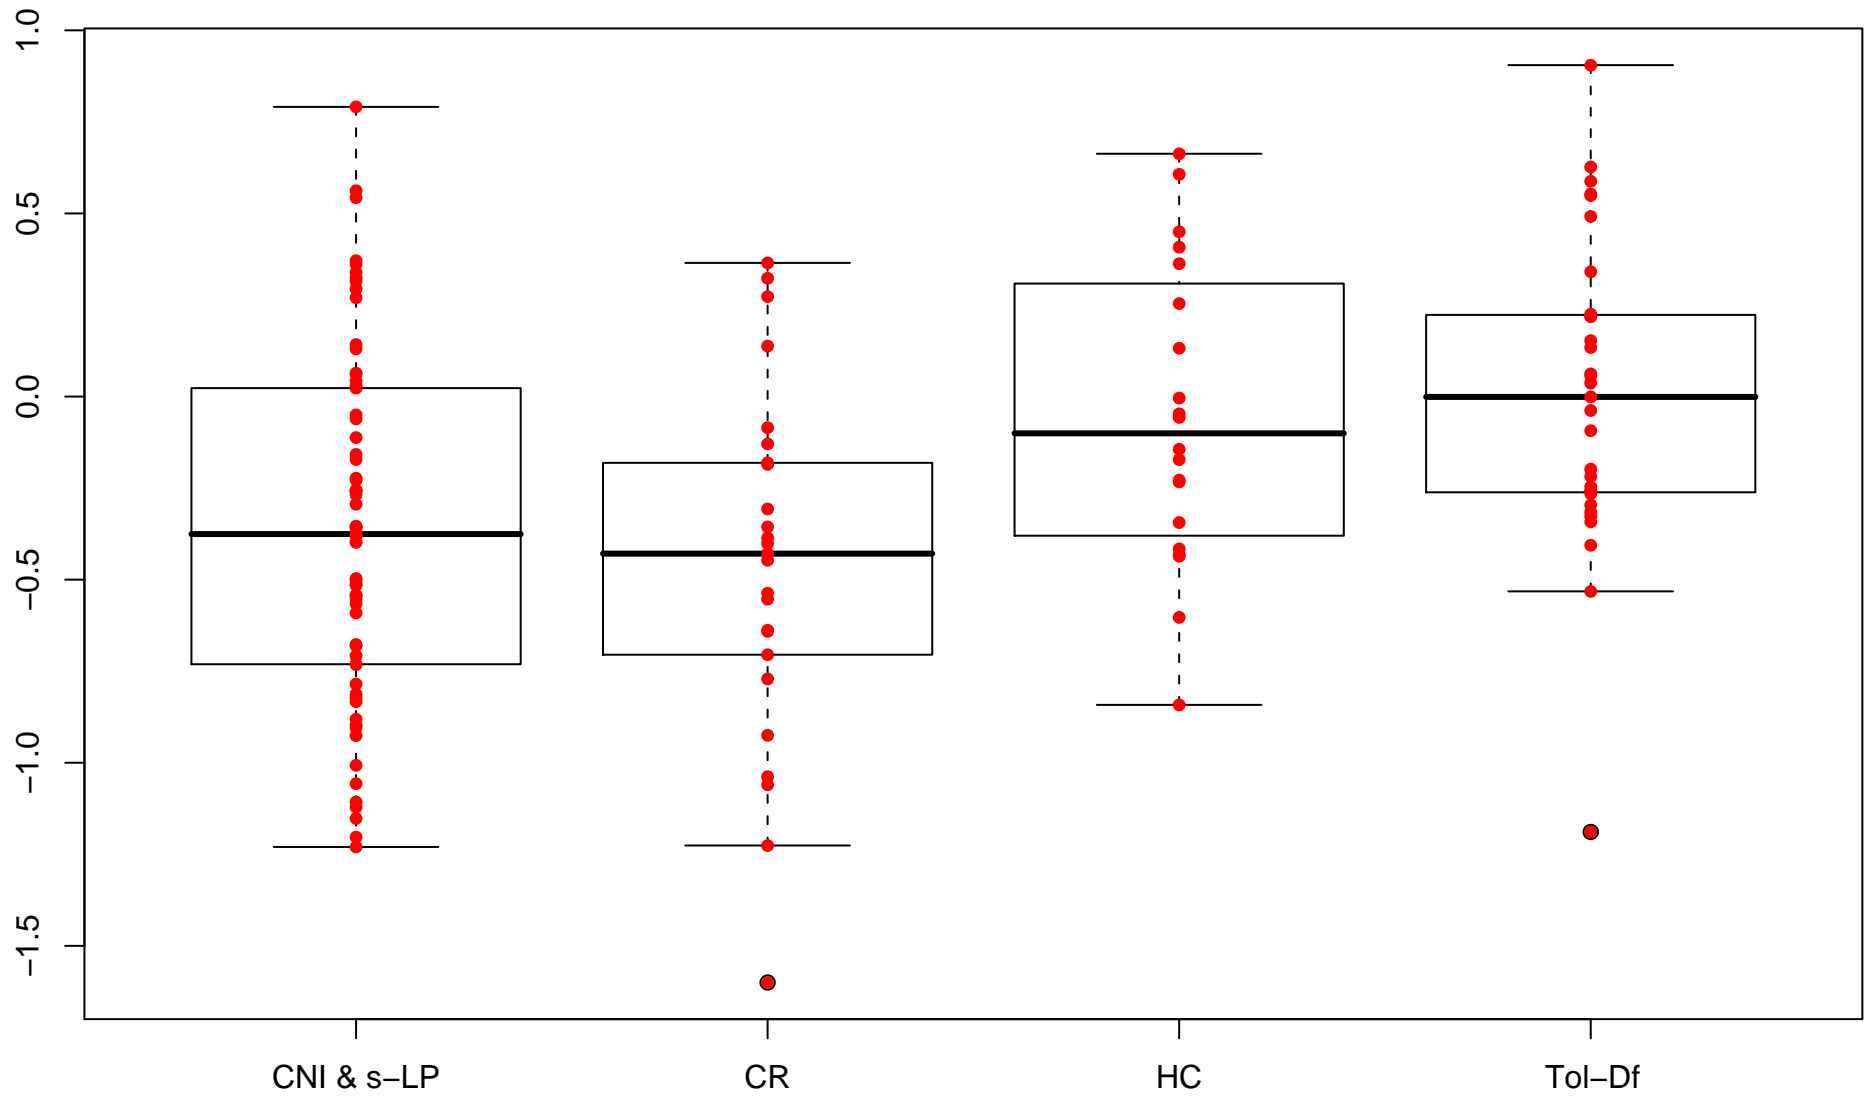

Rank 443 : XBP1  
0.00015807

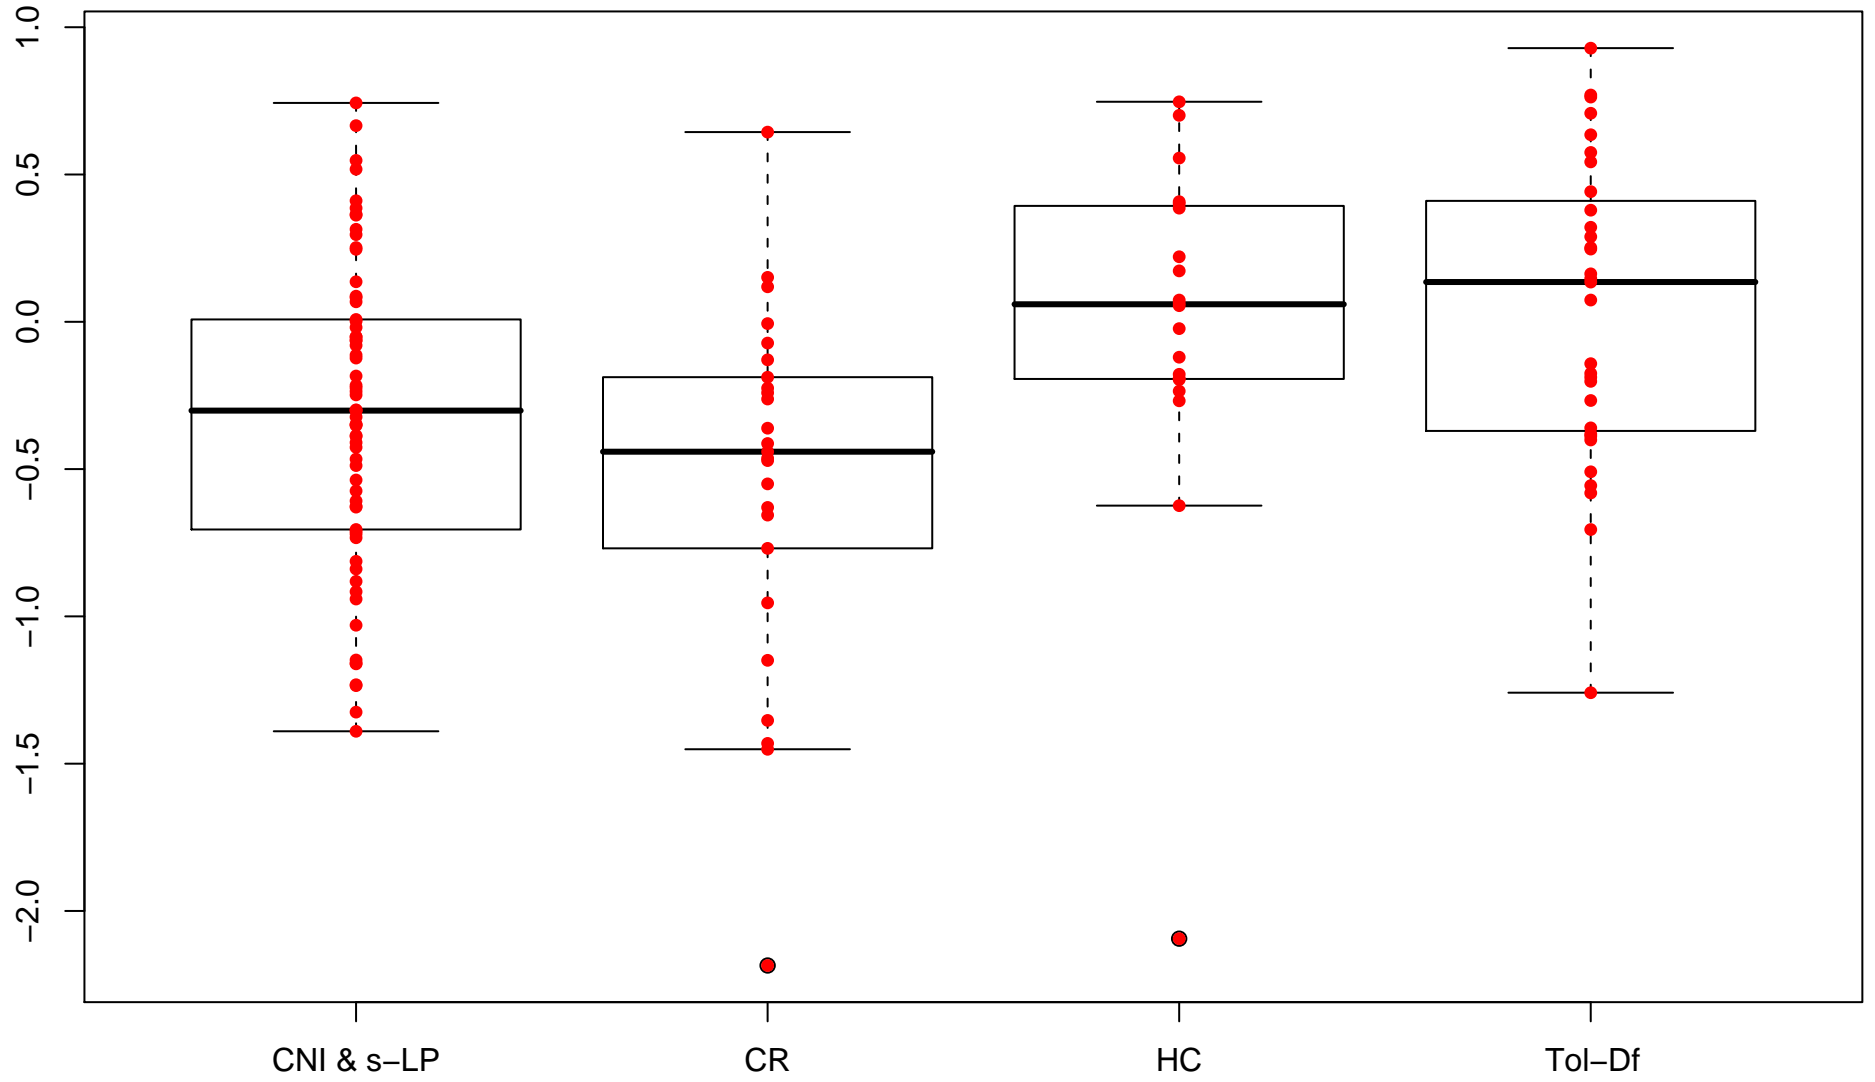

Rank 444 : ATP5F1  
0.00015835

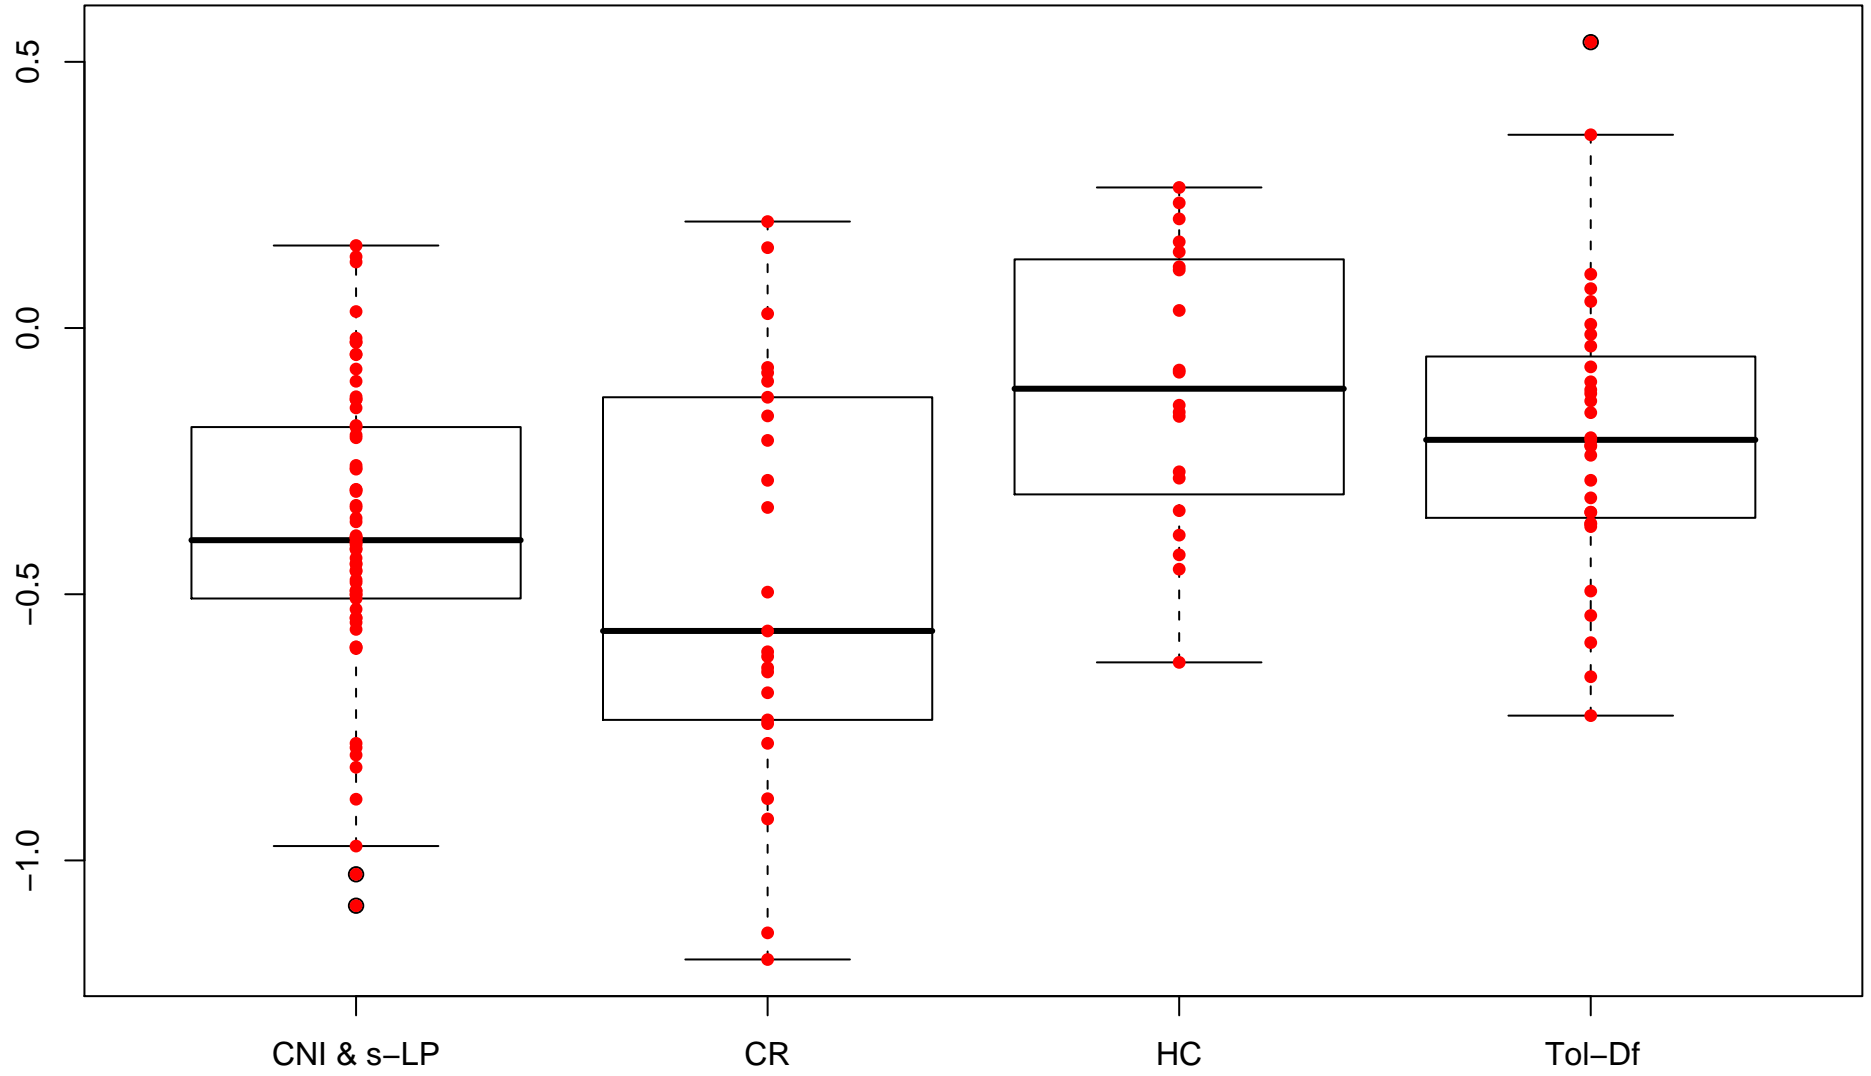

Rank 445 : EVI5  
0.00016323

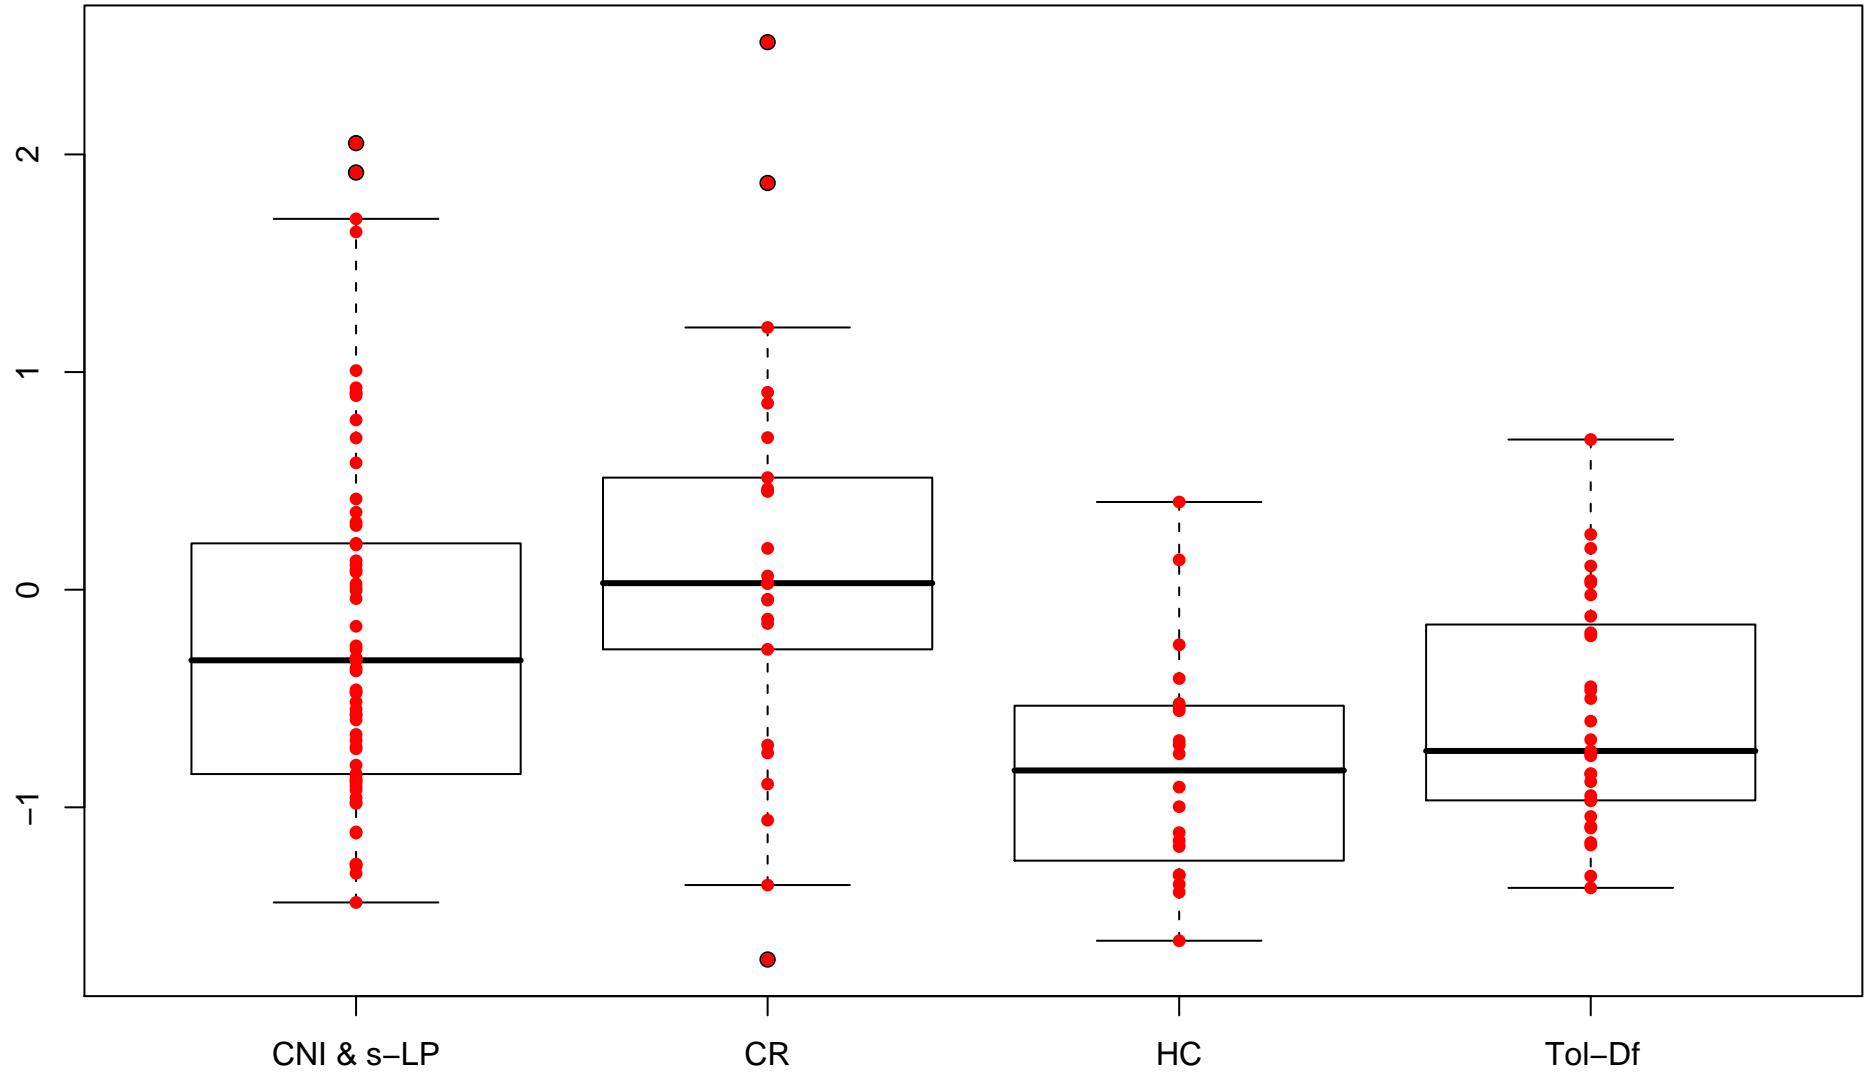

Rank 446 : LEPROT  
0.00016338

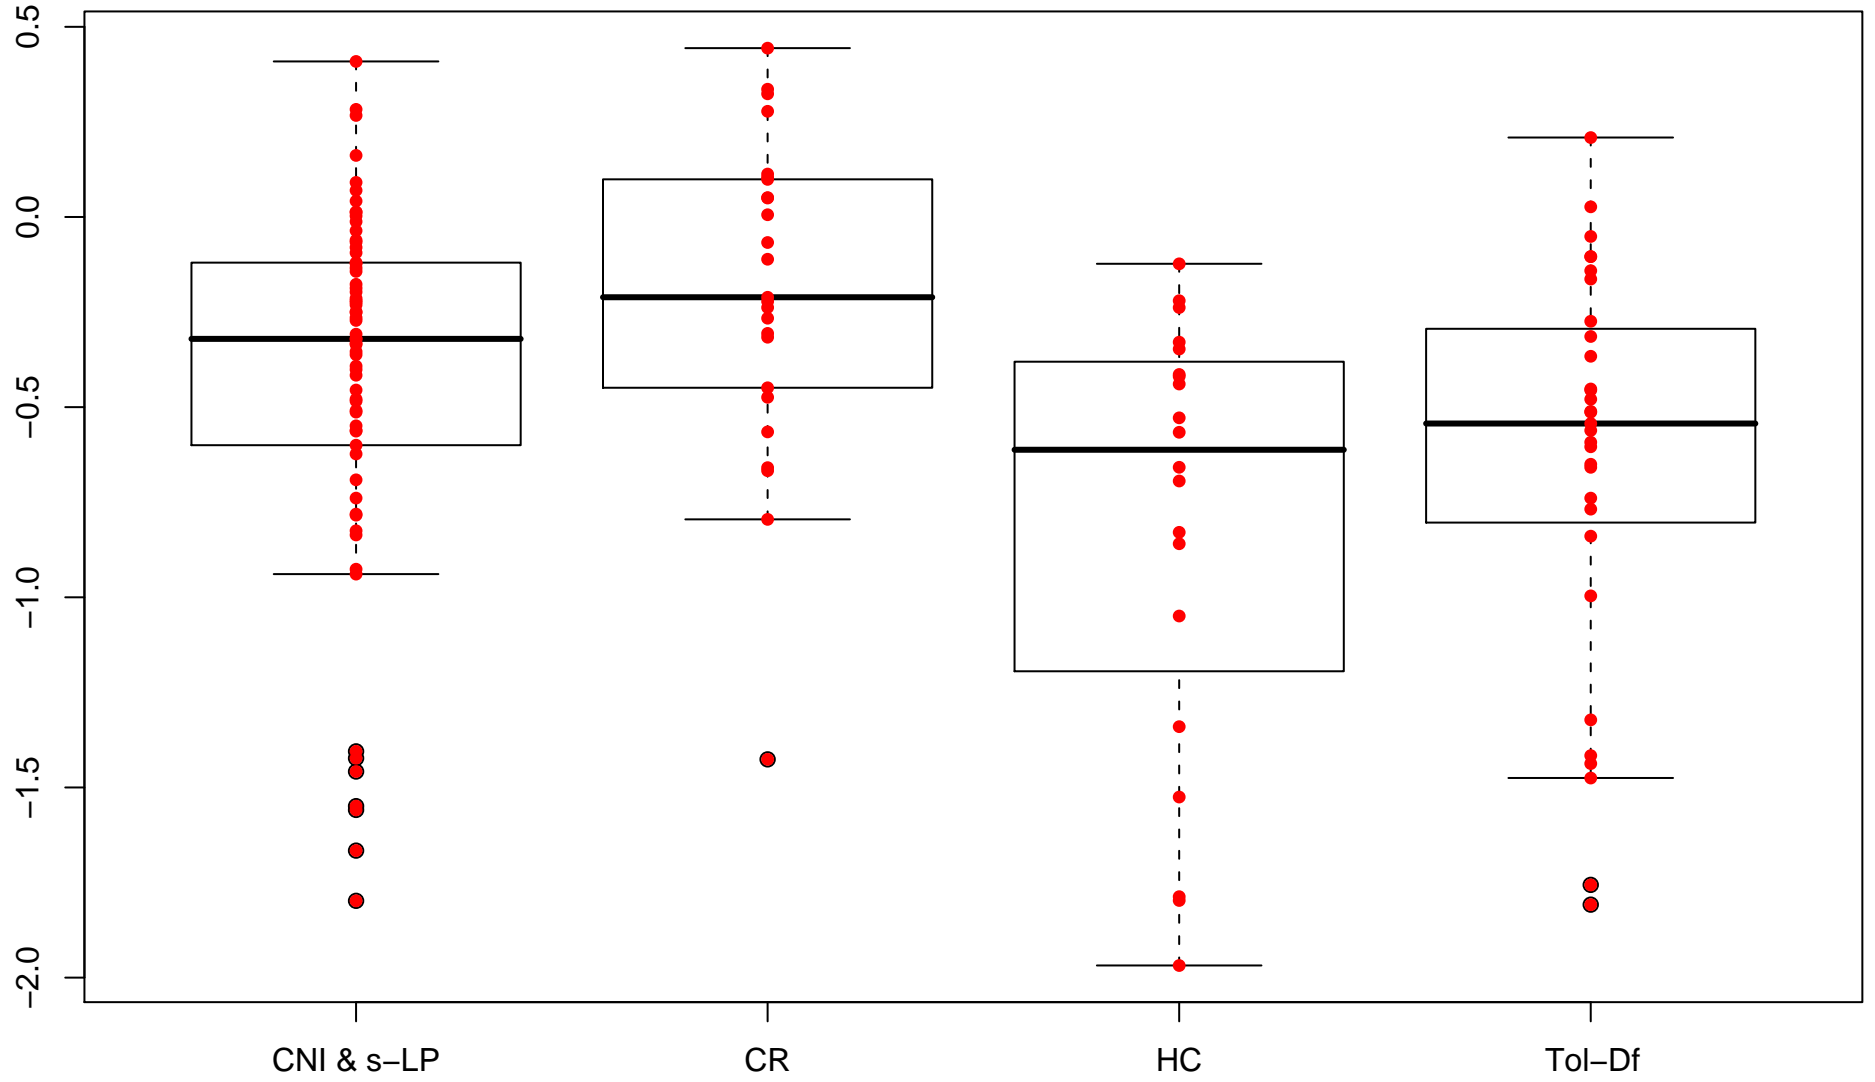

Rank 447 : FGD2  
0.0001671

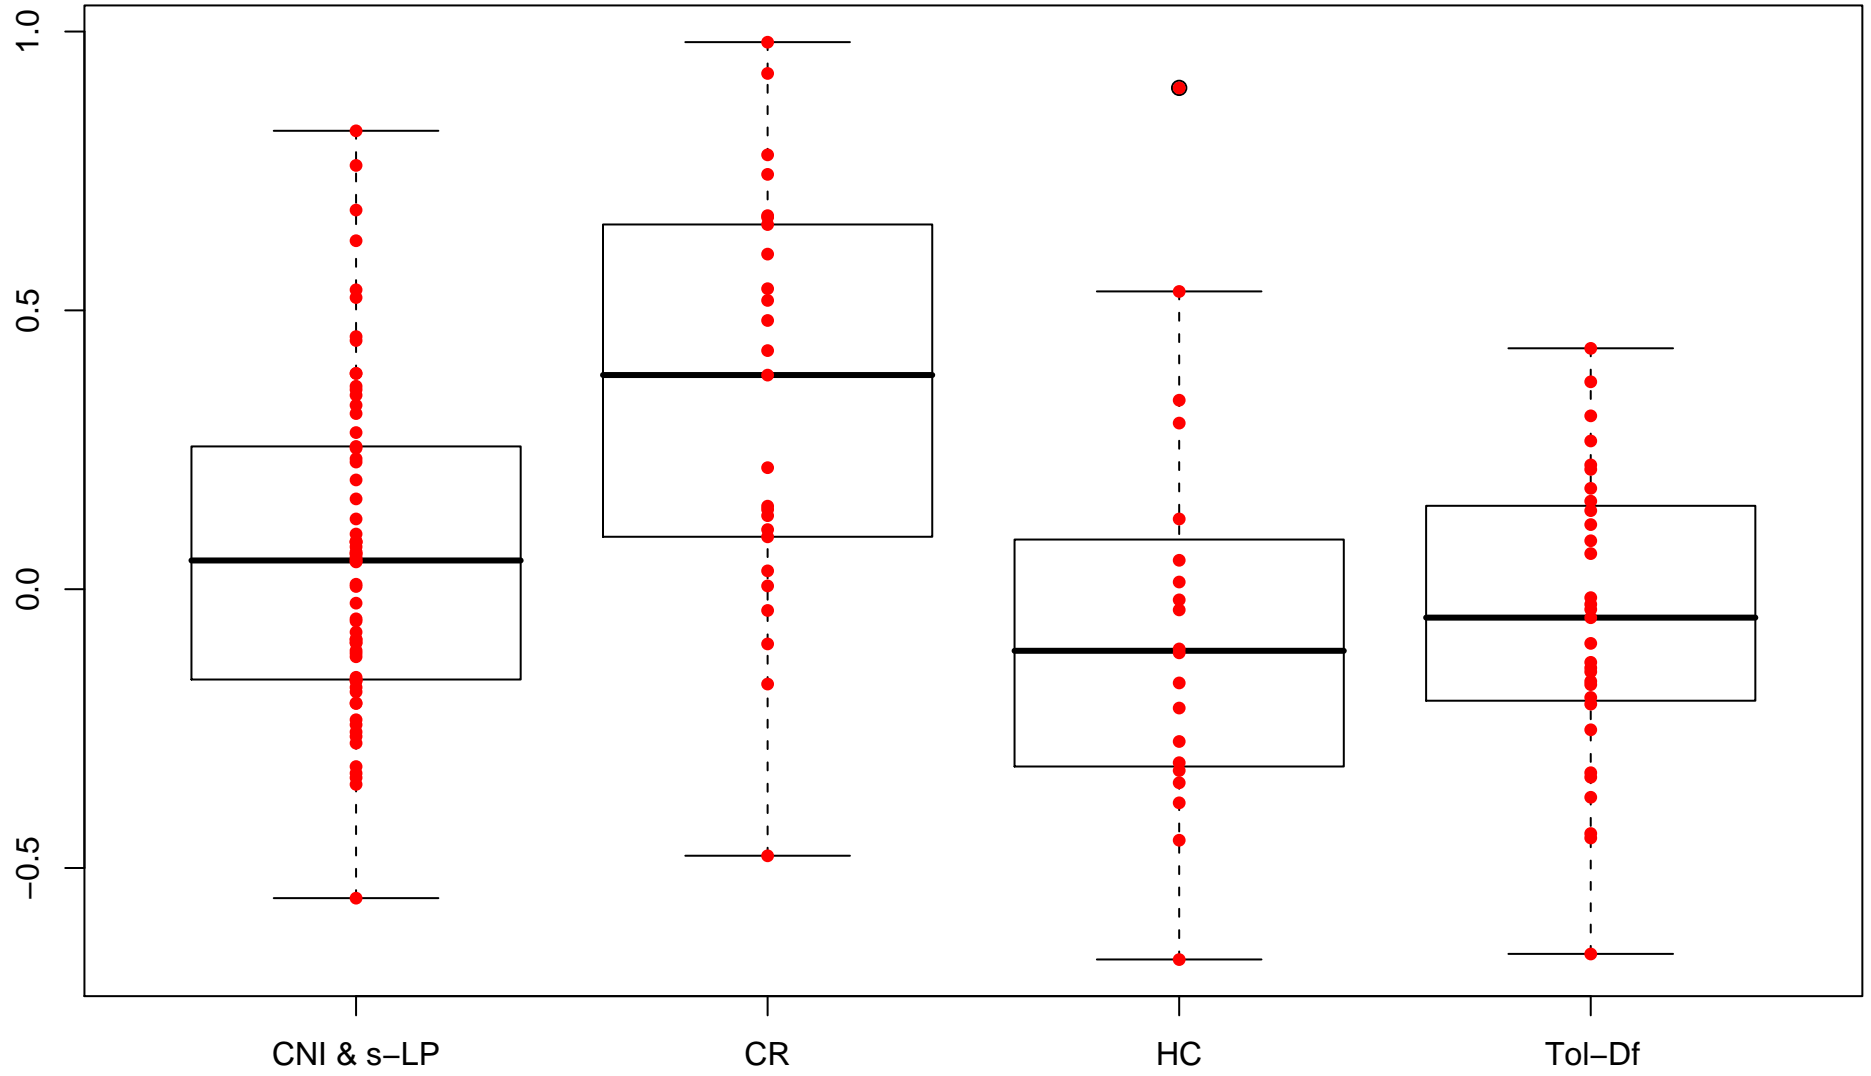



Rank 448 : WHDC1L1  
0.0001672

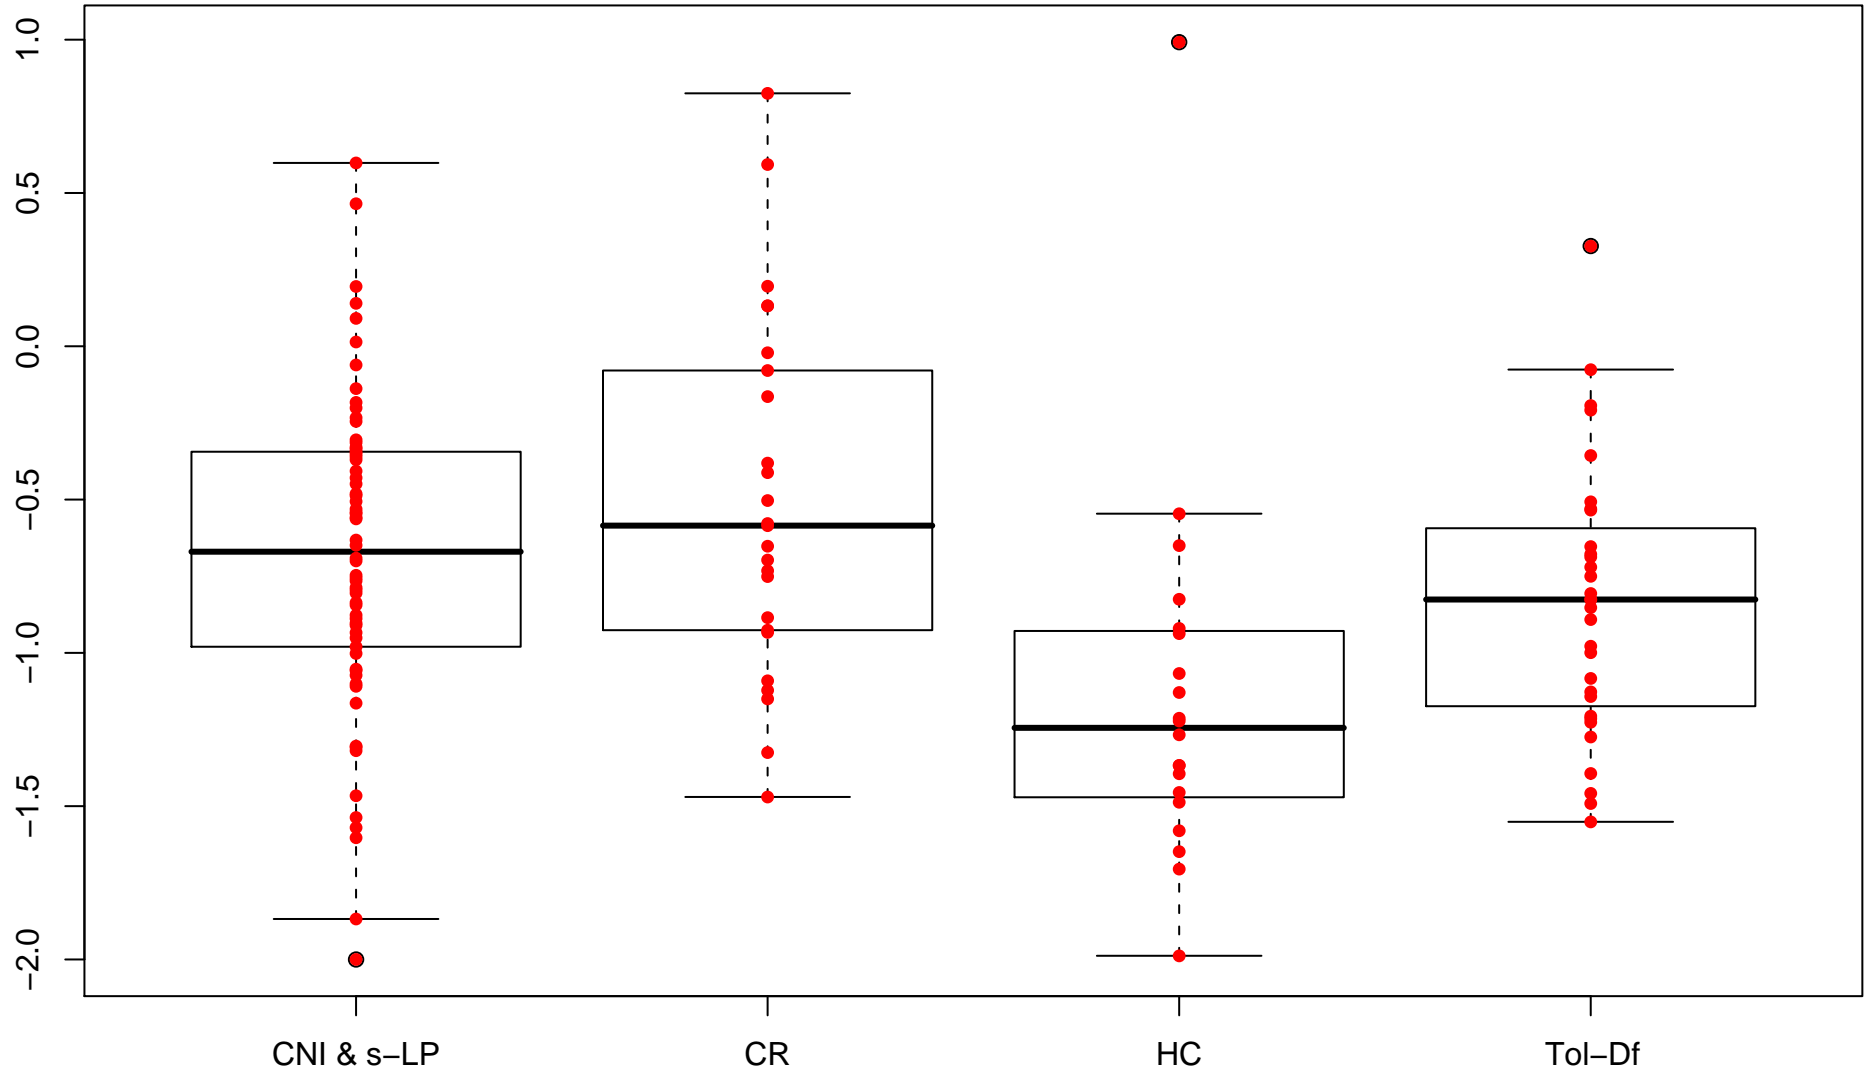

Rank 449 : AKAP8L  
0.00016795

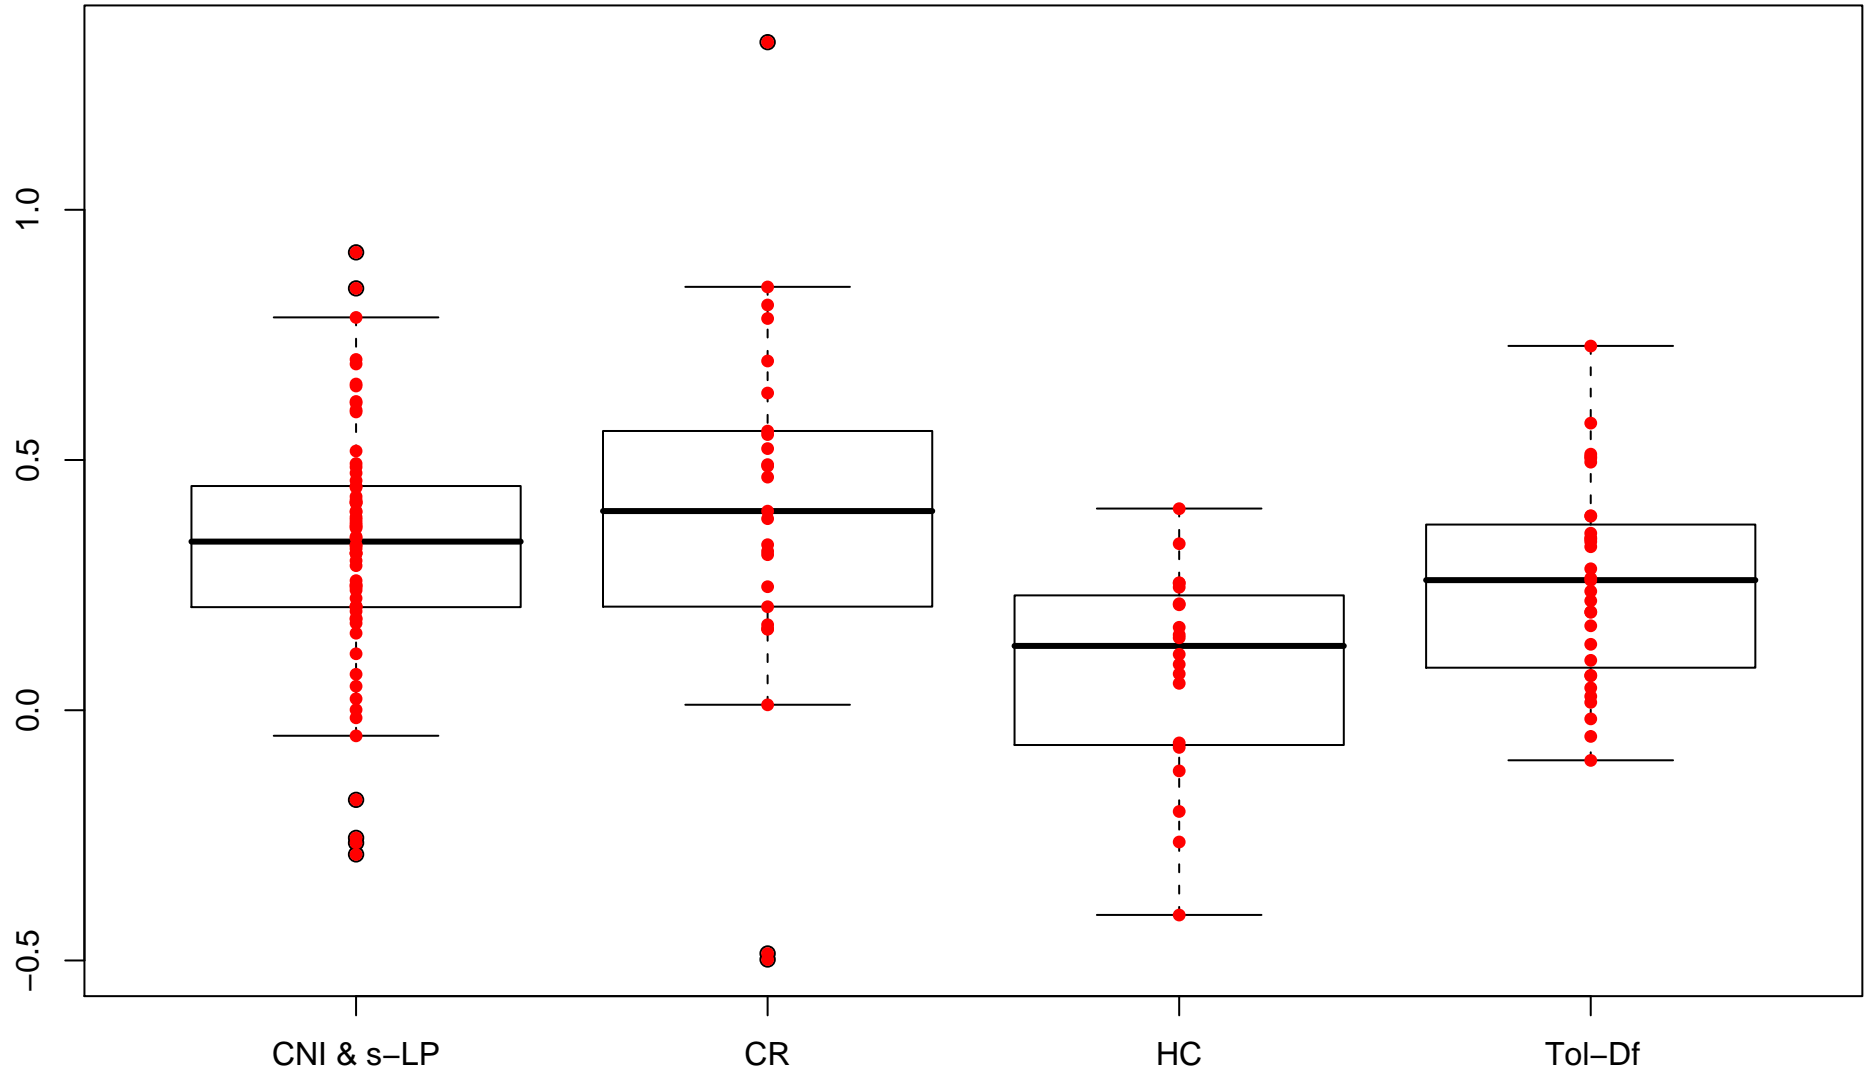

Rank 450 : VSIG4  
0.00016797

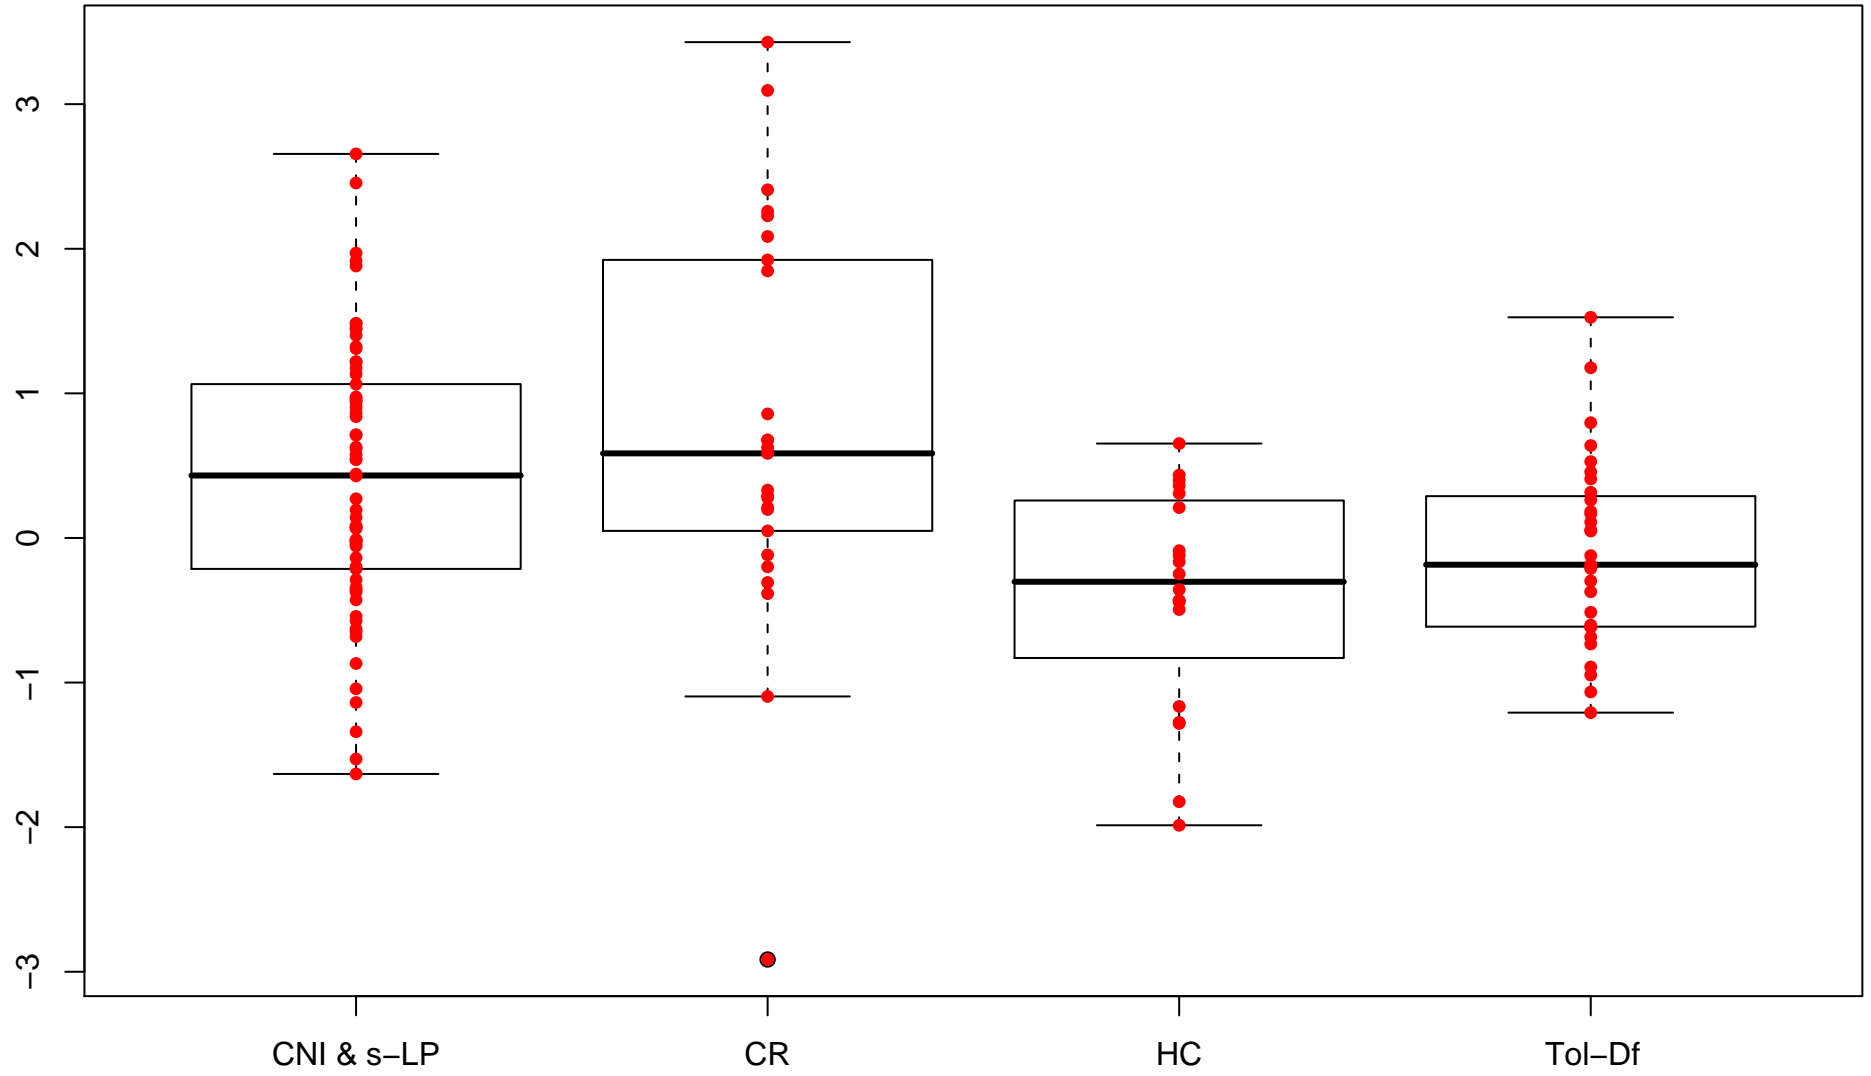

Rank 451 : BZW1  
0.00016827

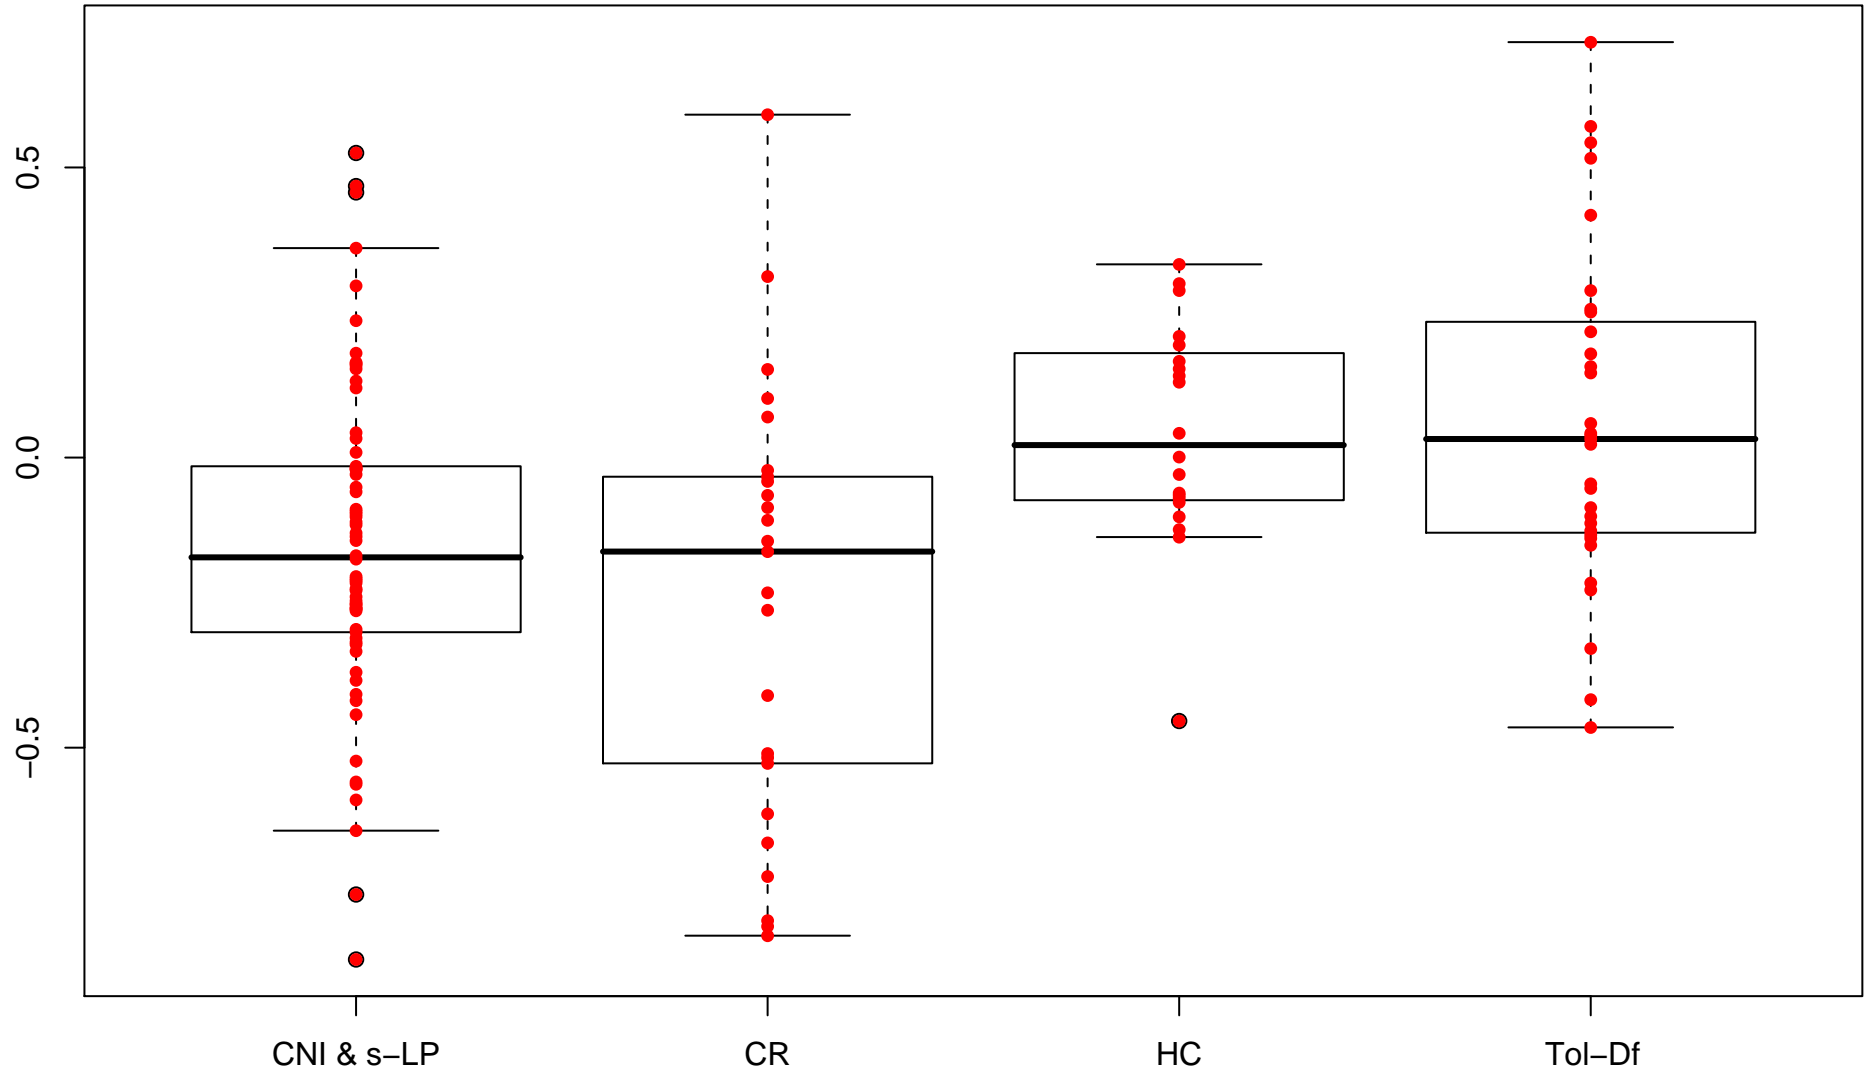

Rank 452 : CREBL2  
0.00016892

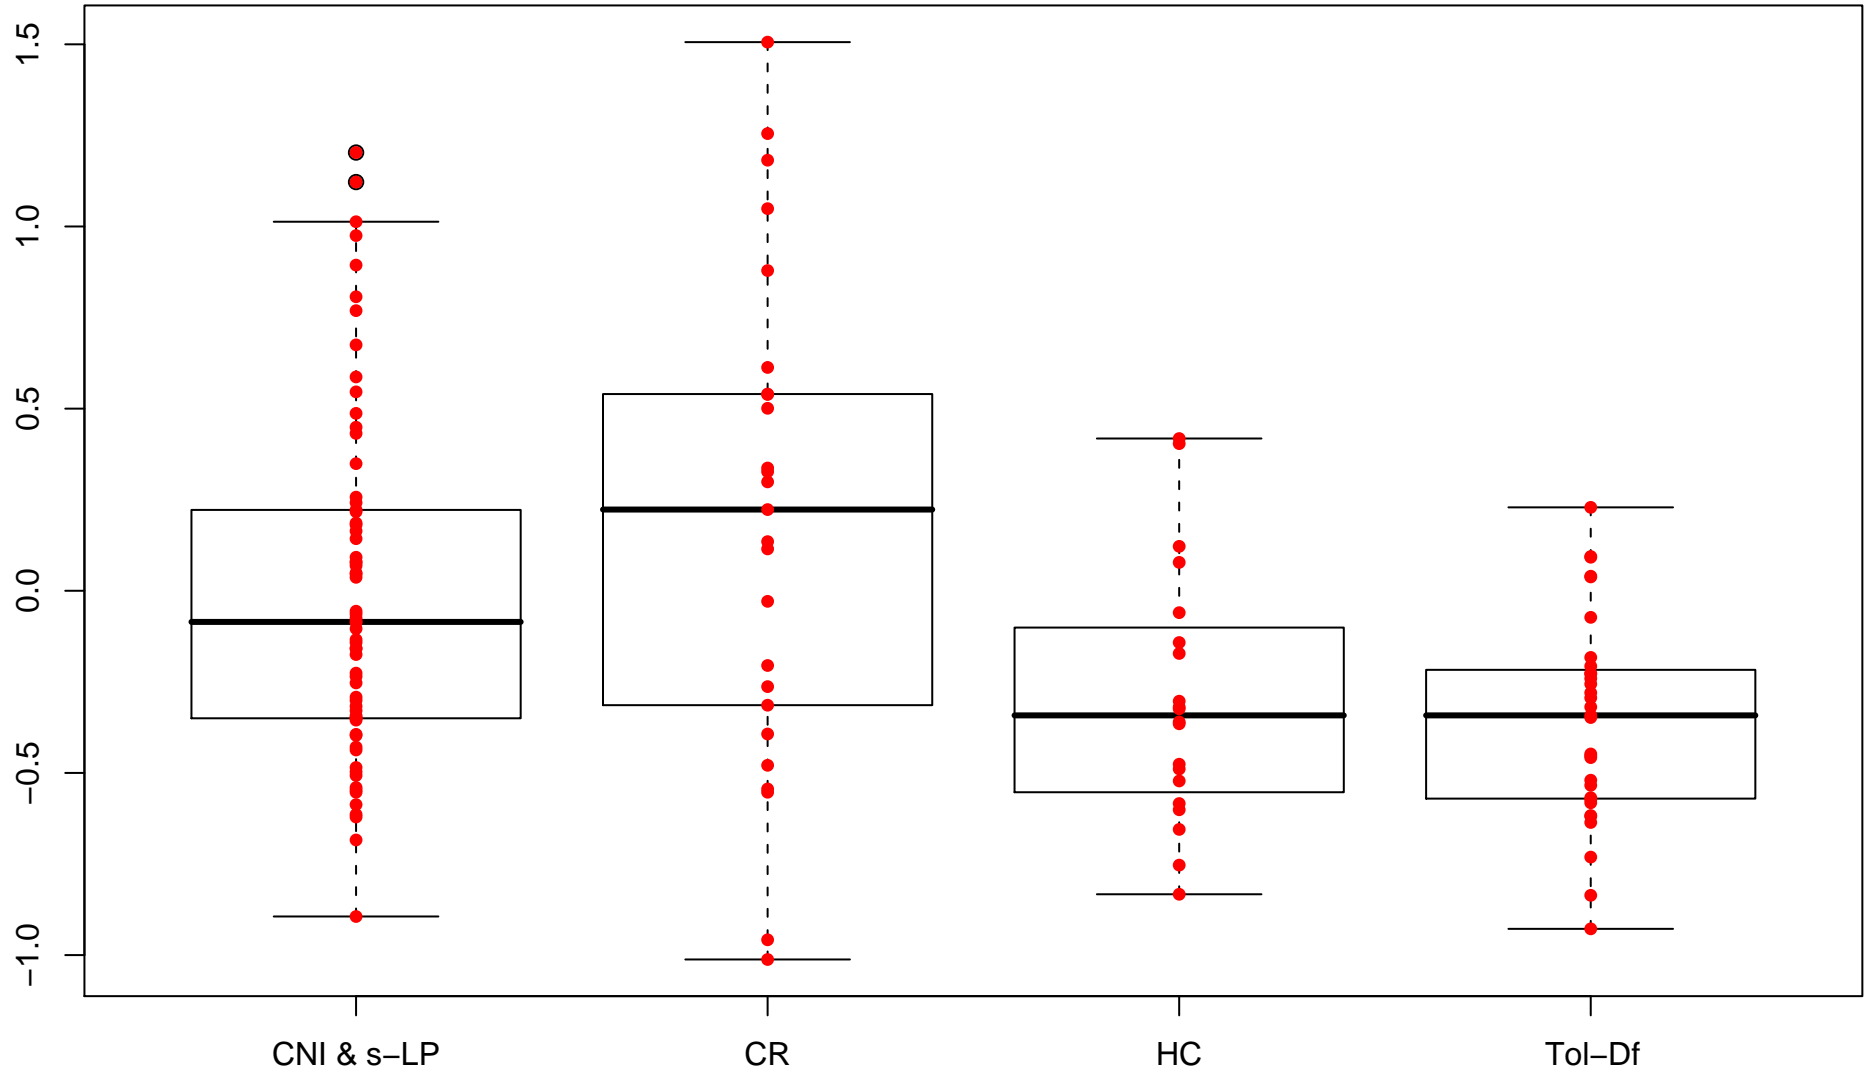

Rank 453 : GRN  
0.00017178

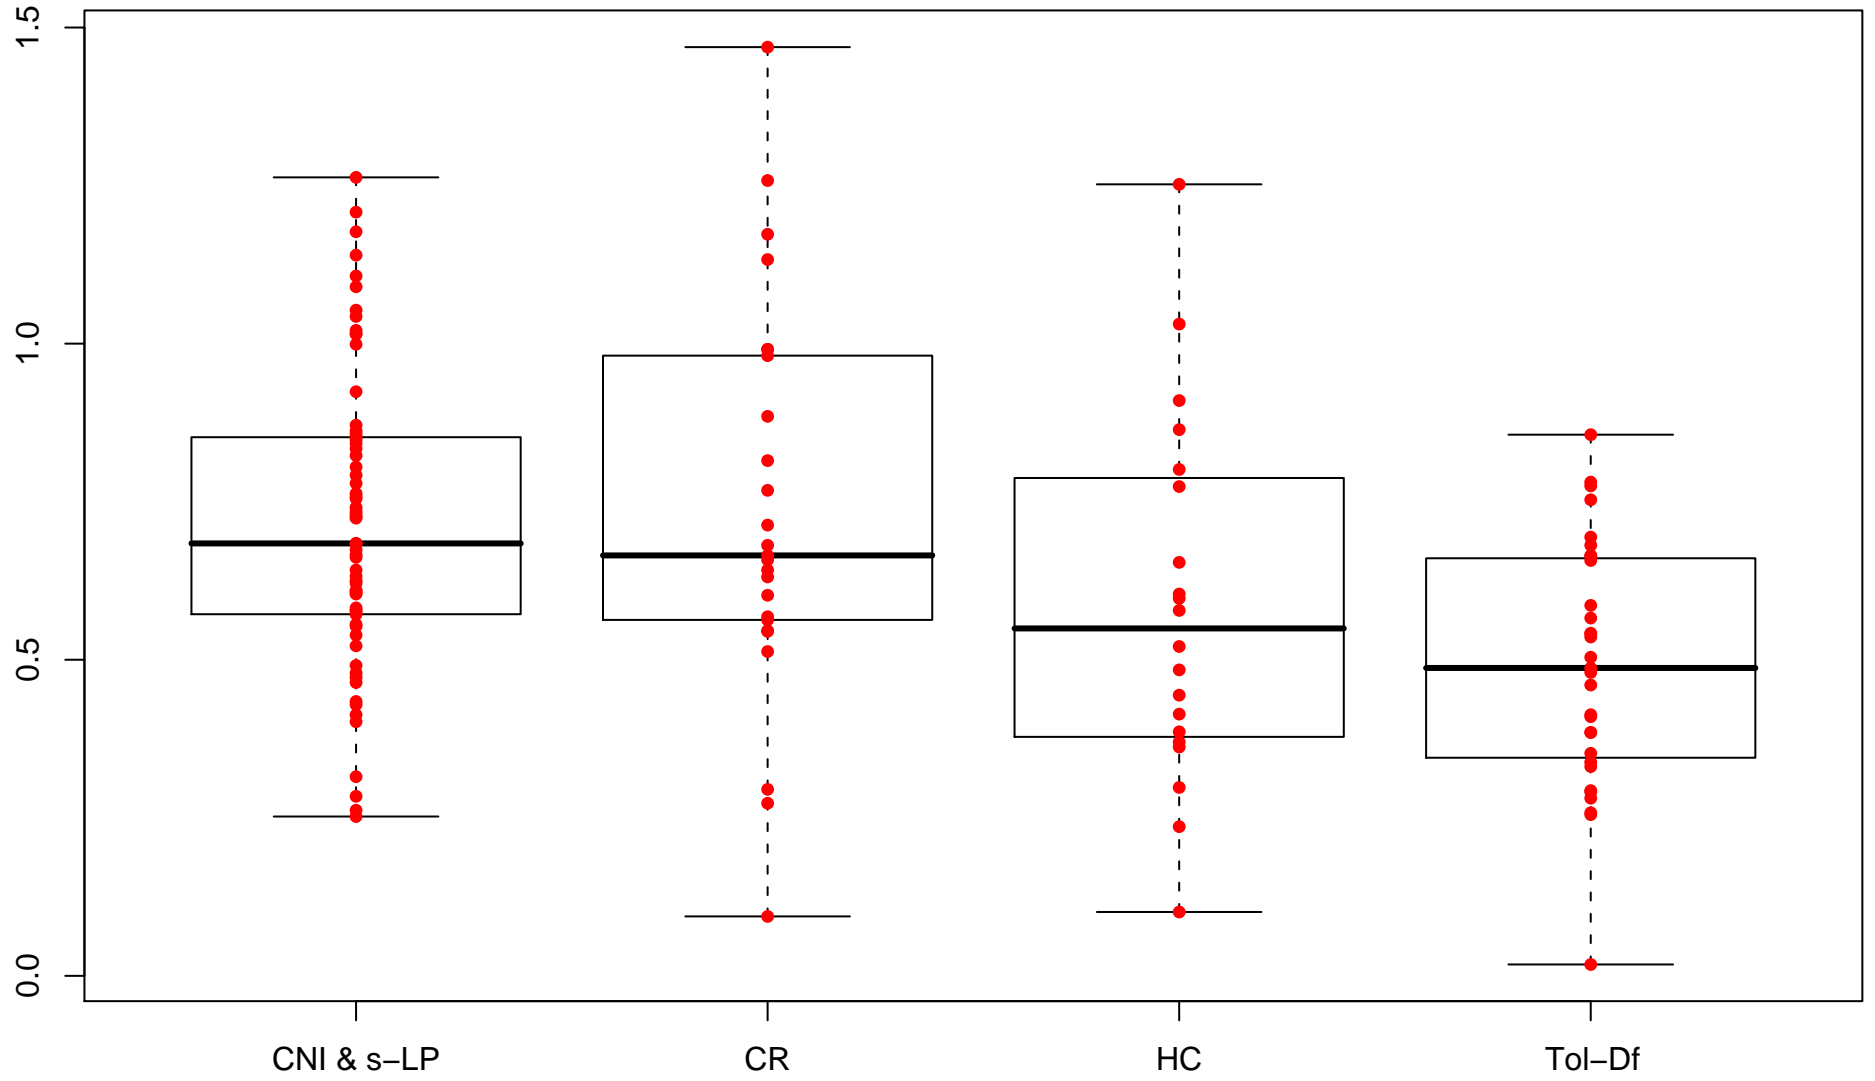

Rank 454 : PCGF6  
0.00017217

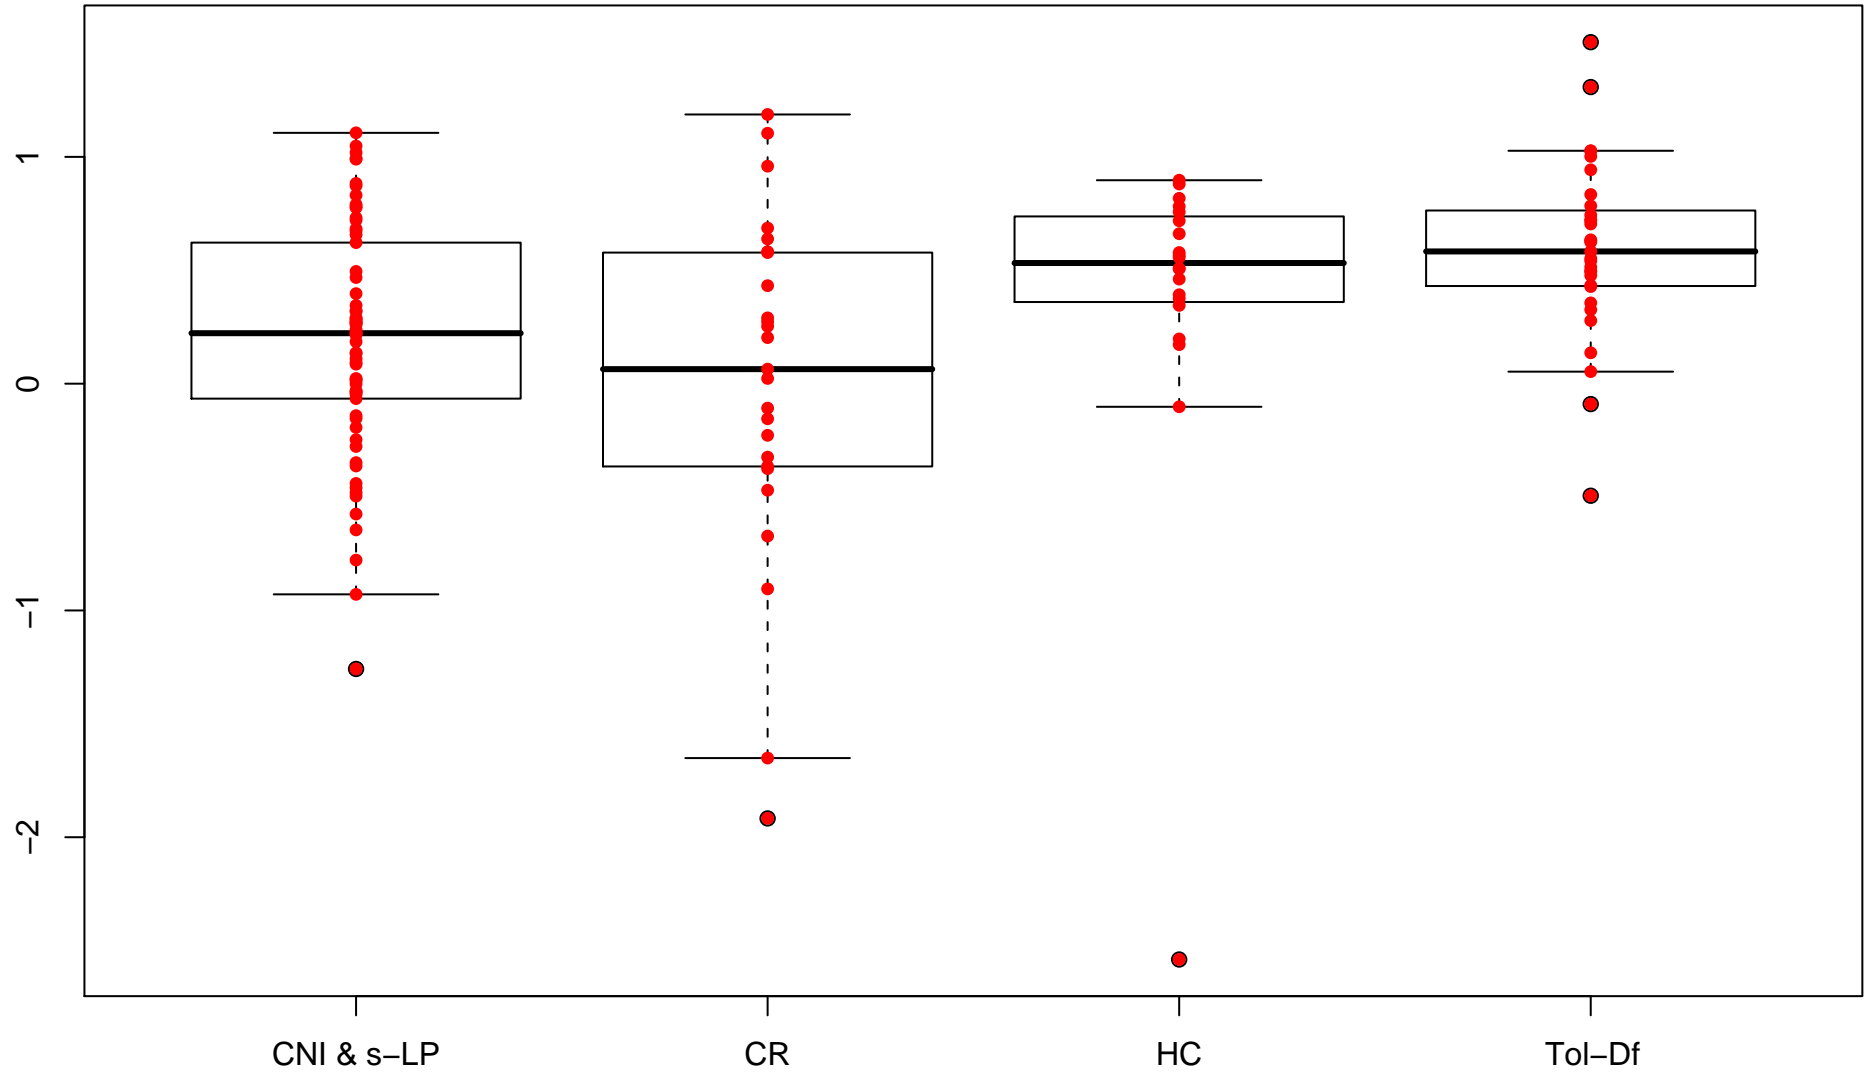

Rank 455 : LMO2  
0.00017242

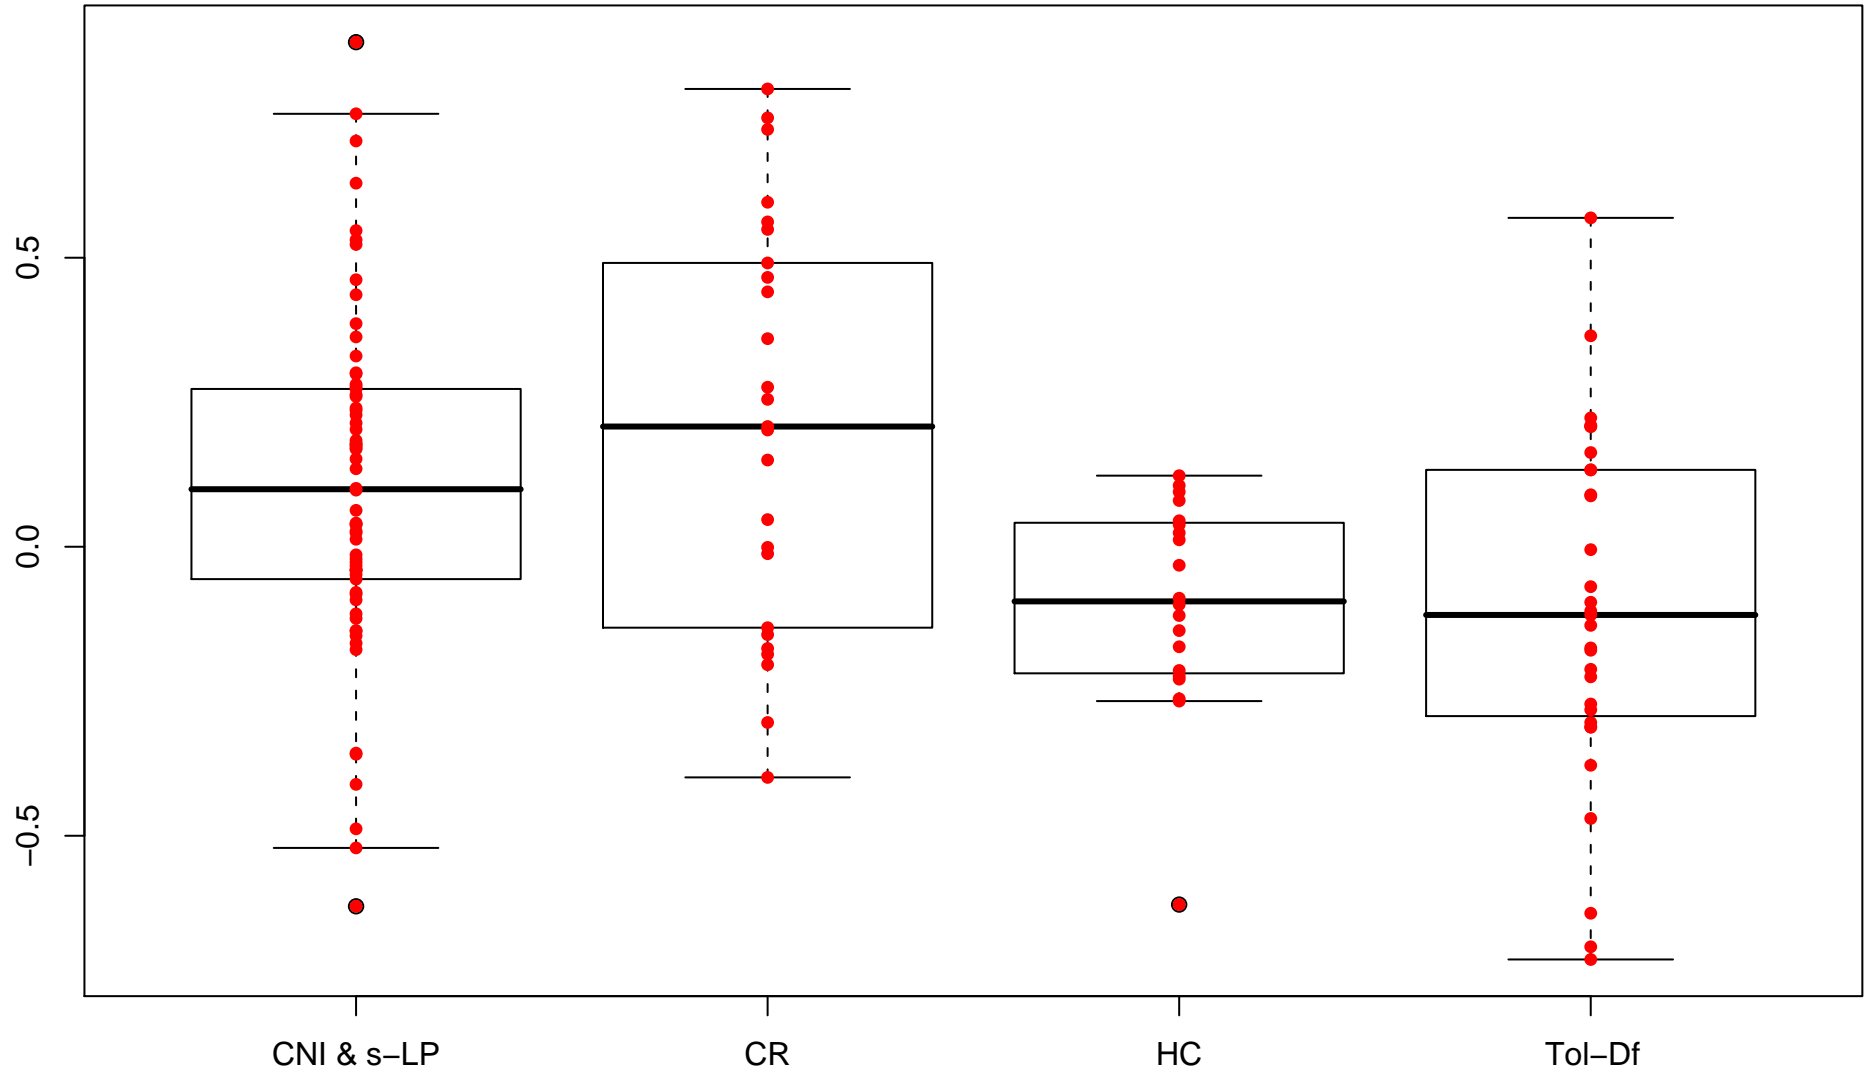



Rank 456 : IQCK  
0.0001733

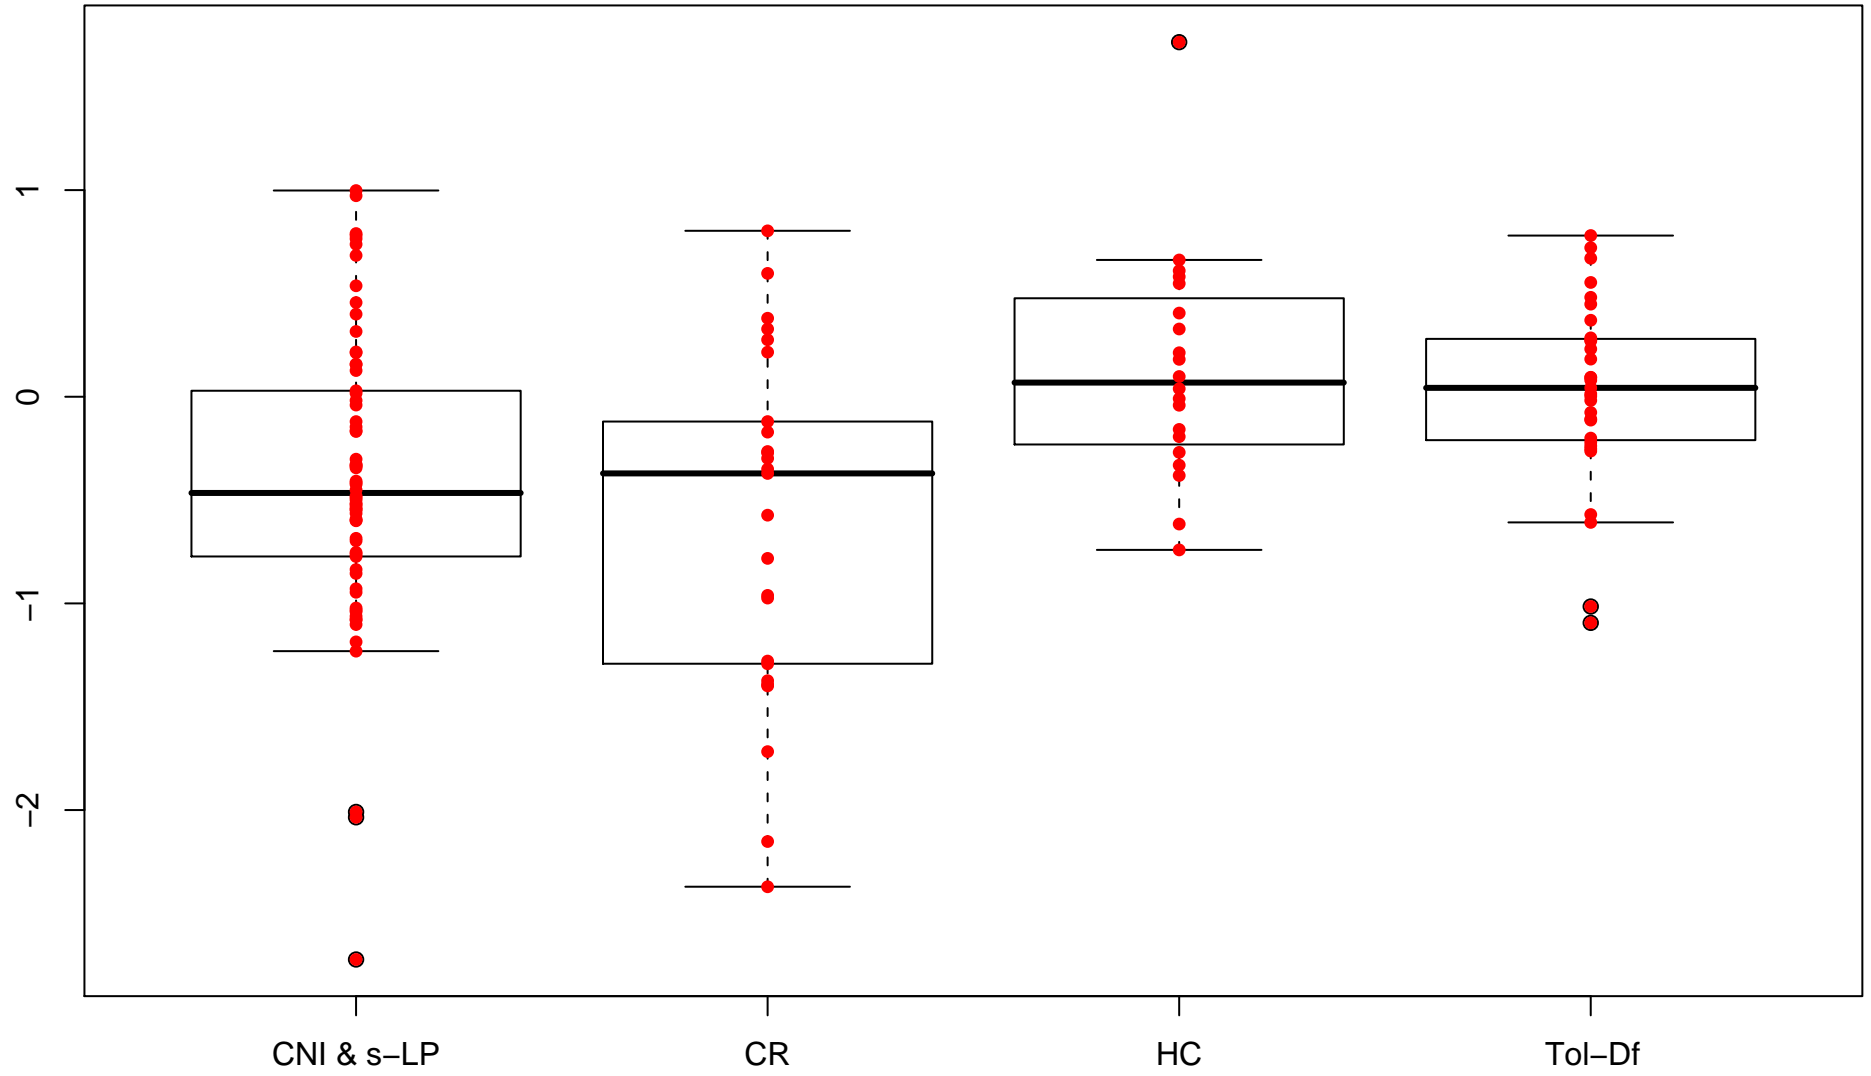

Rank 457 : KIF1C  
0.00017399

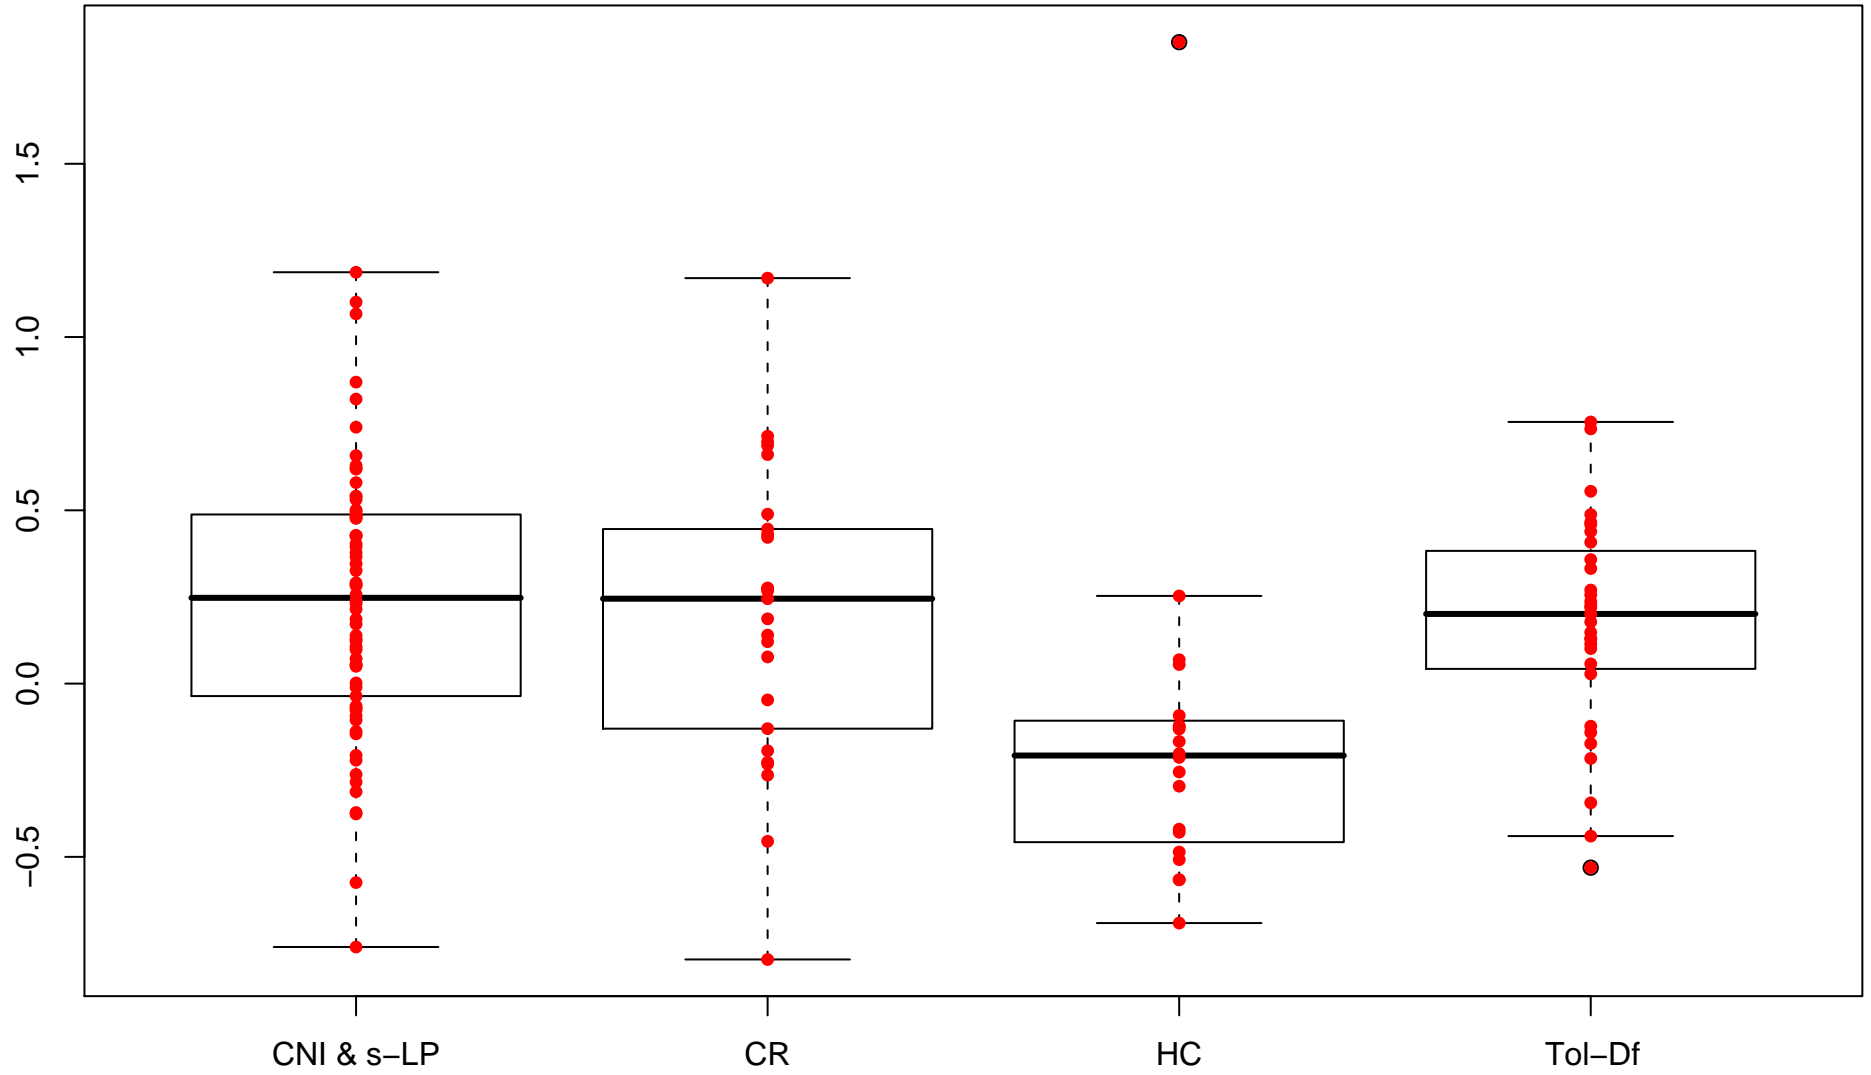

Rank 458 : KIF3C  
0.00017556

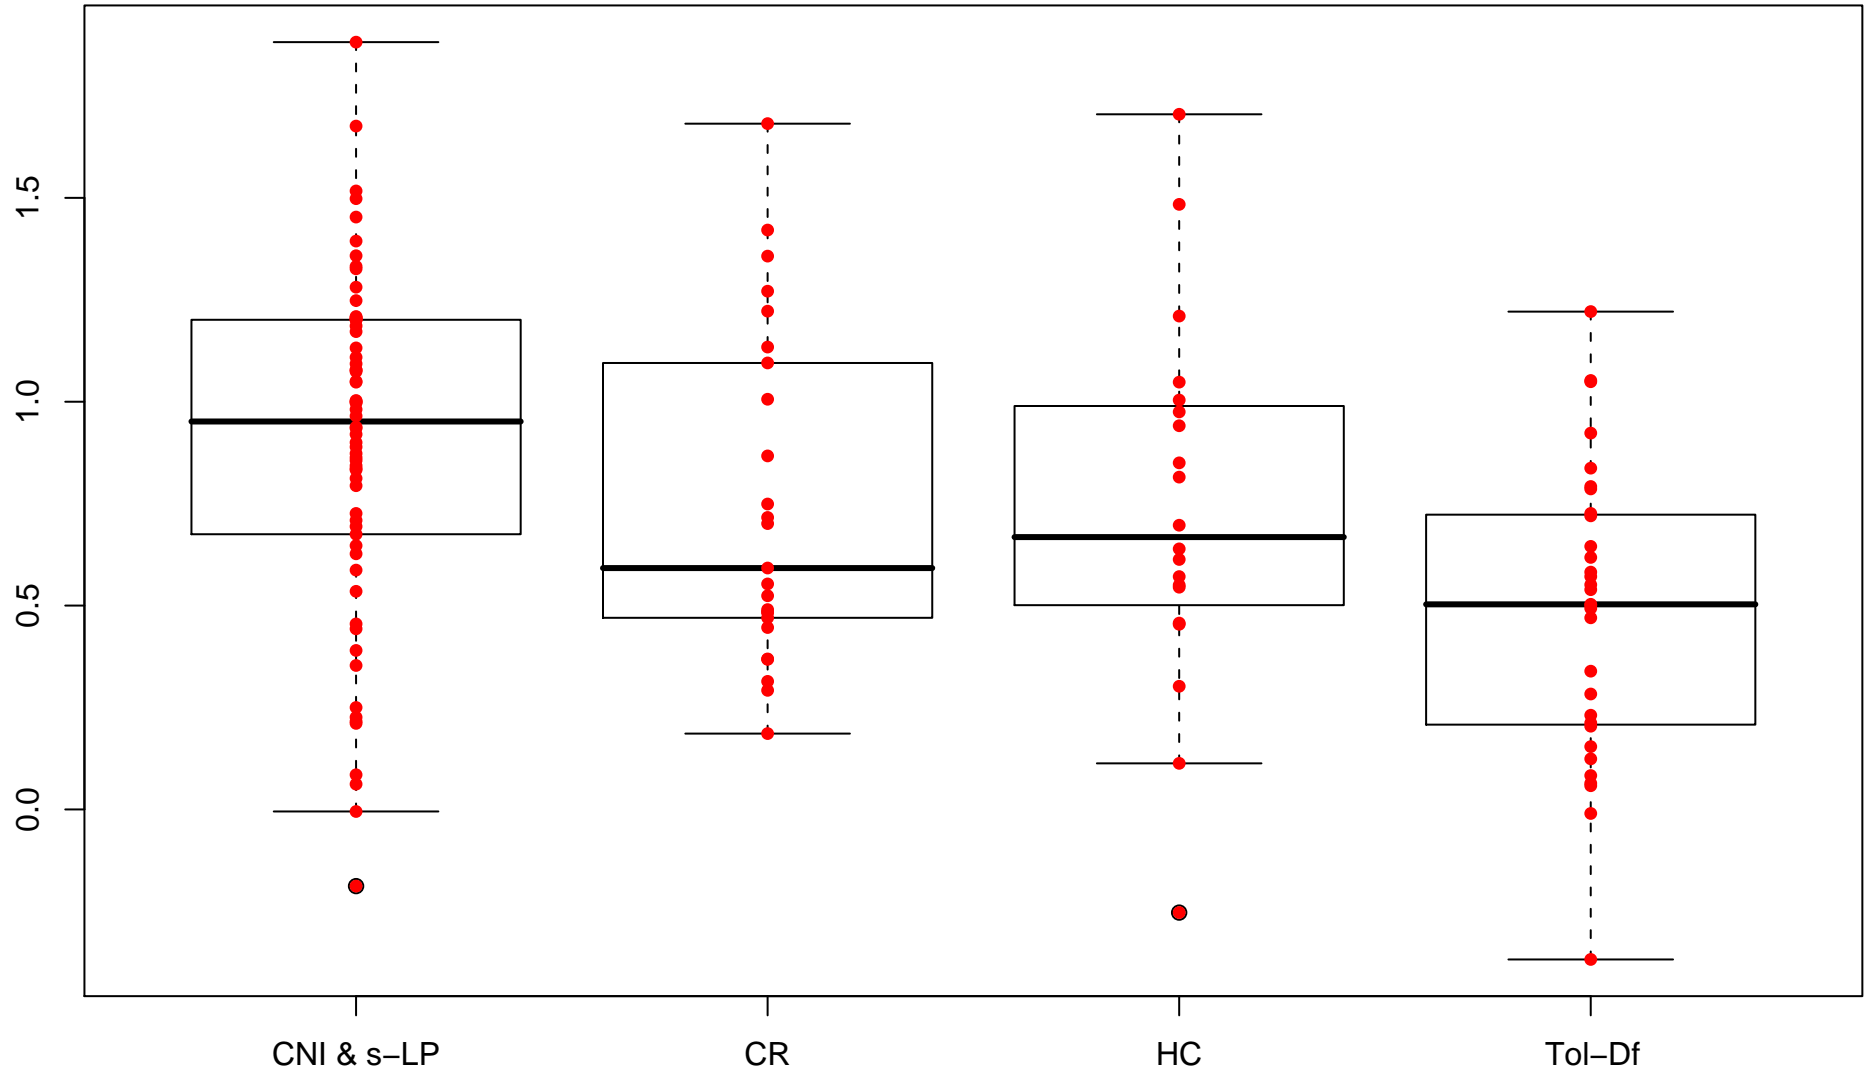

Rank 459 : PLAU  
0.00017919

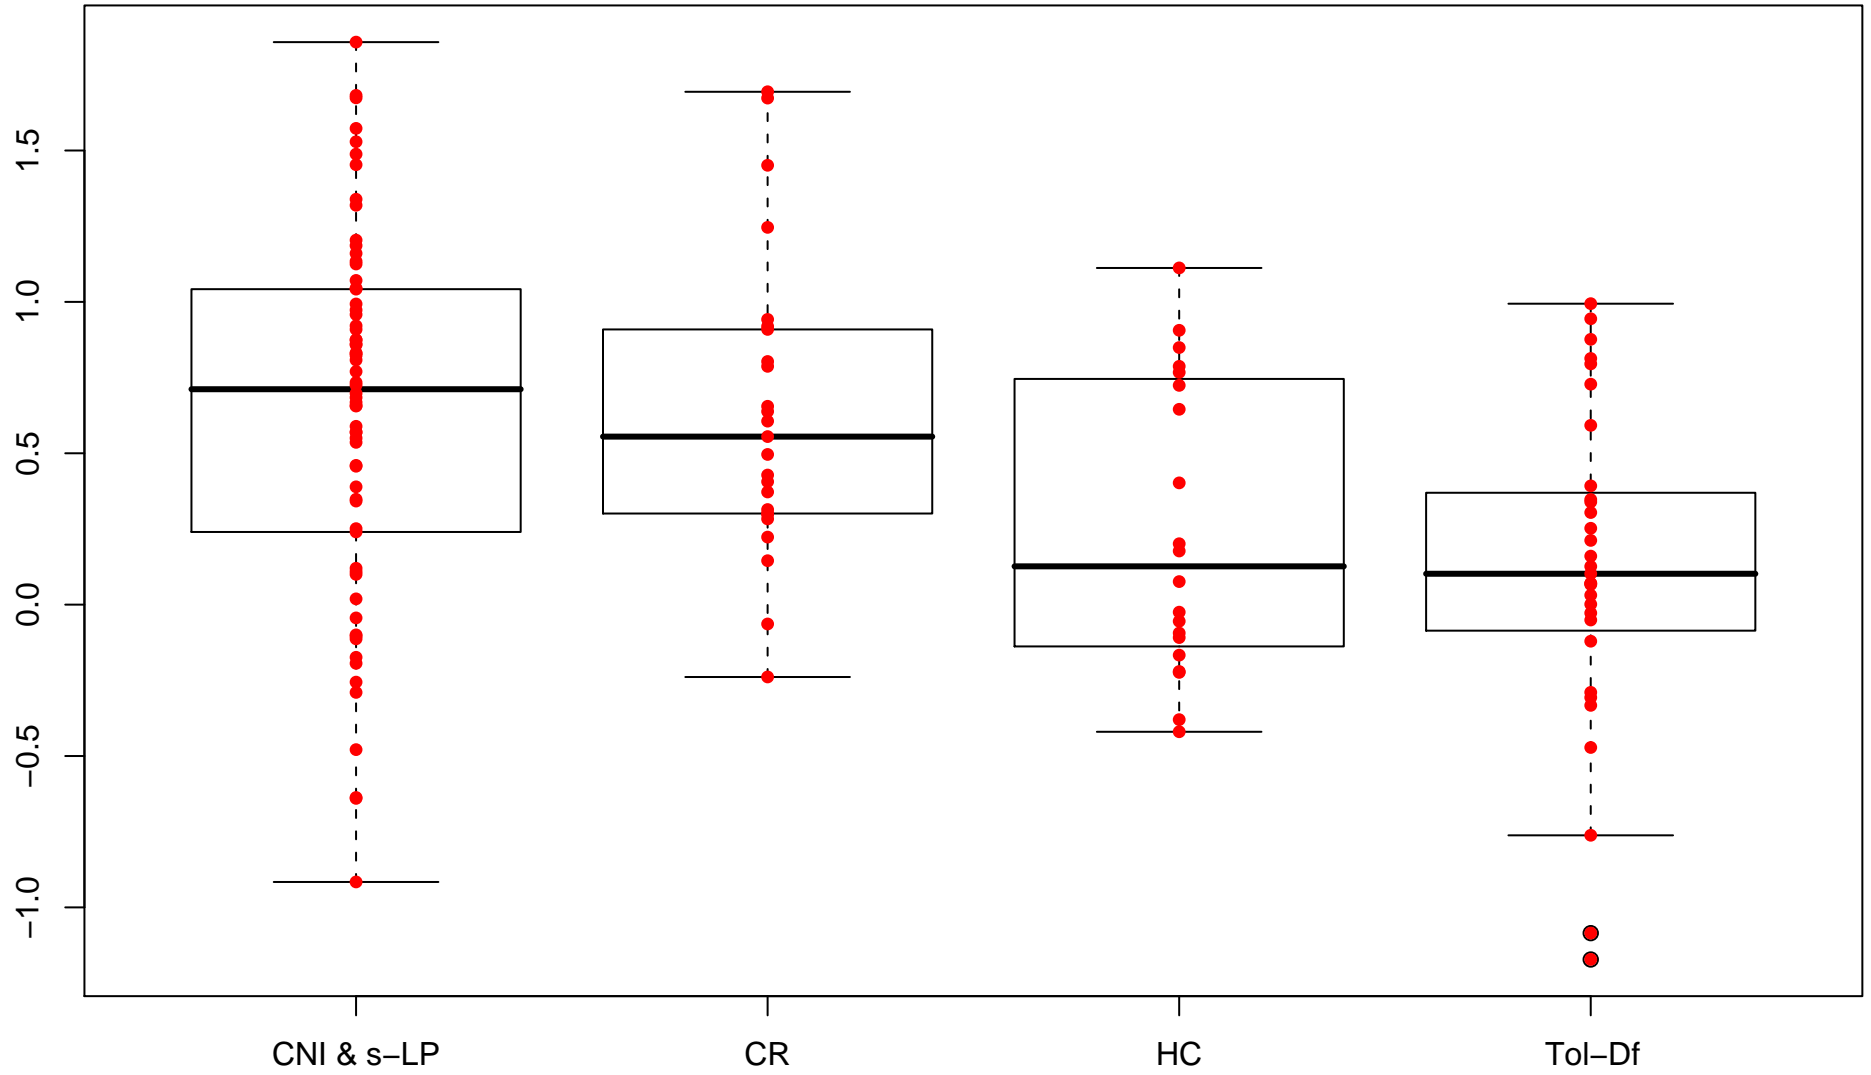

Rank 460 : FYN  
0.00017954

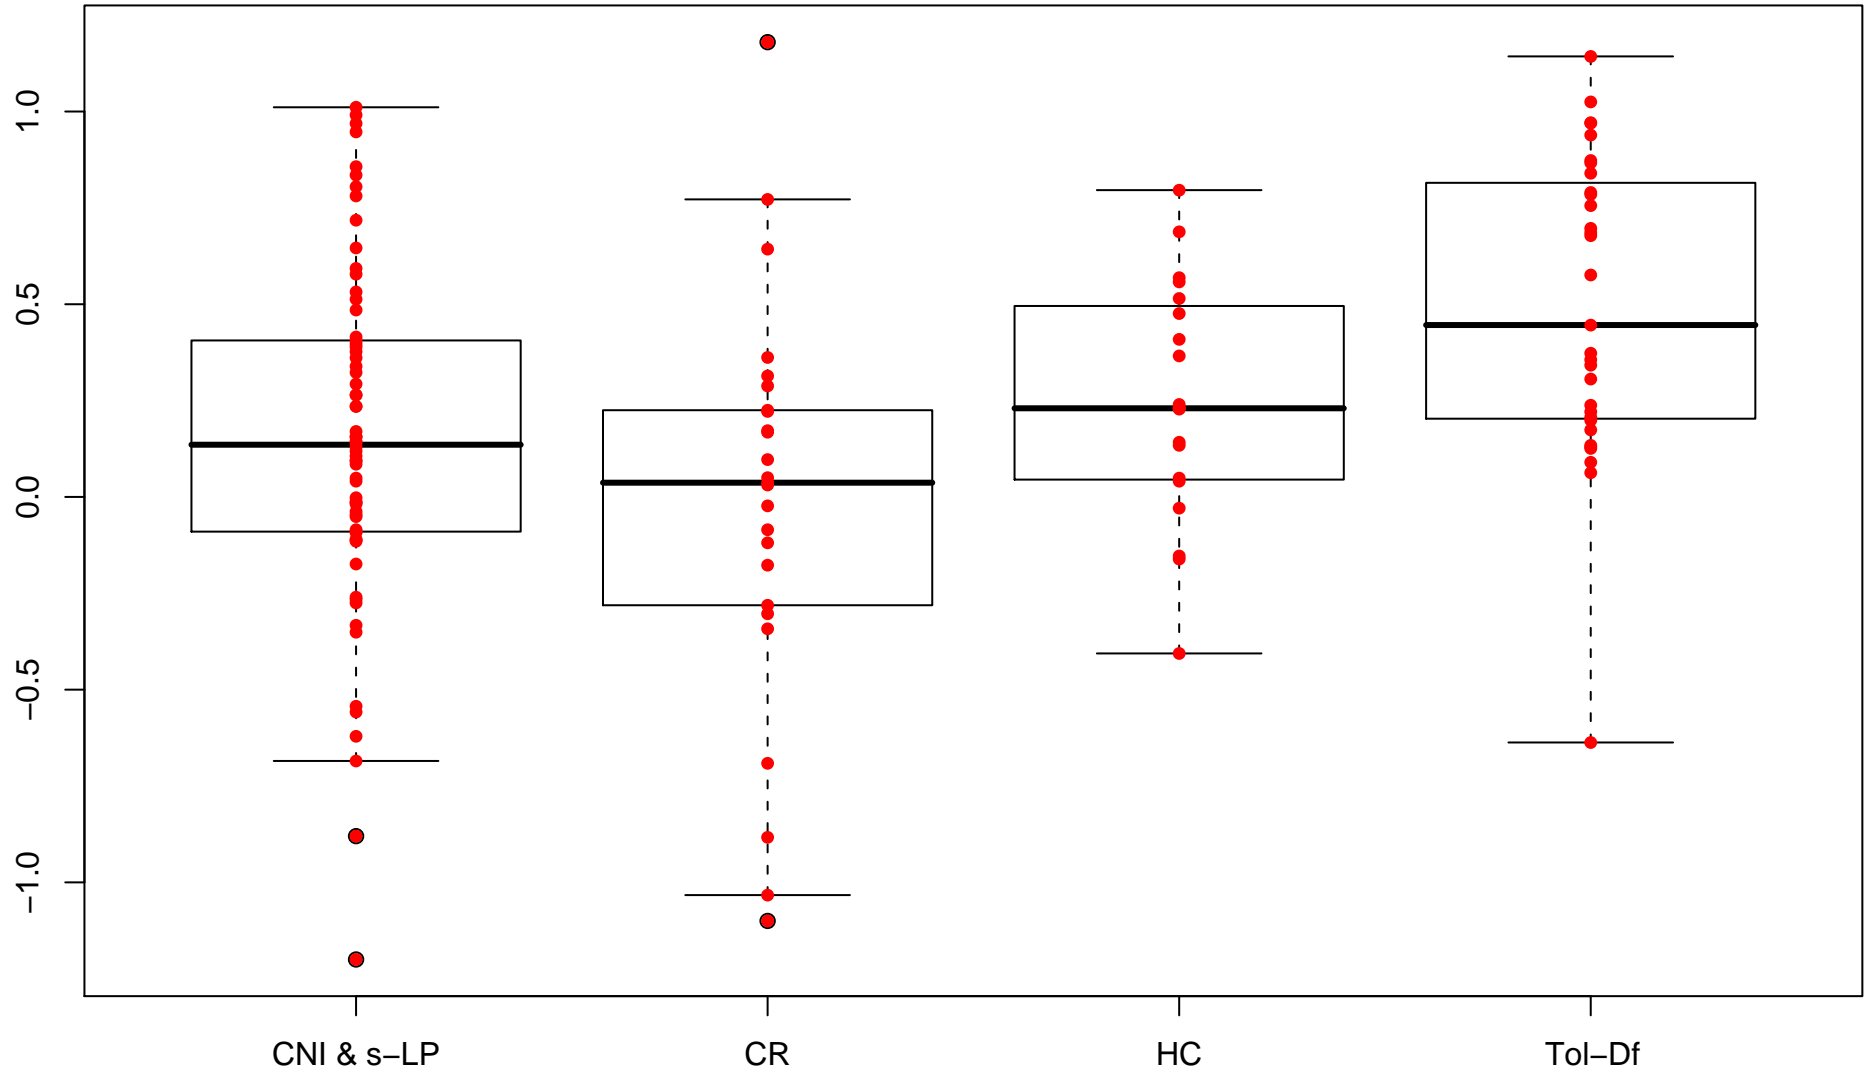

Rank 461 : HEATR1  
0.00018228

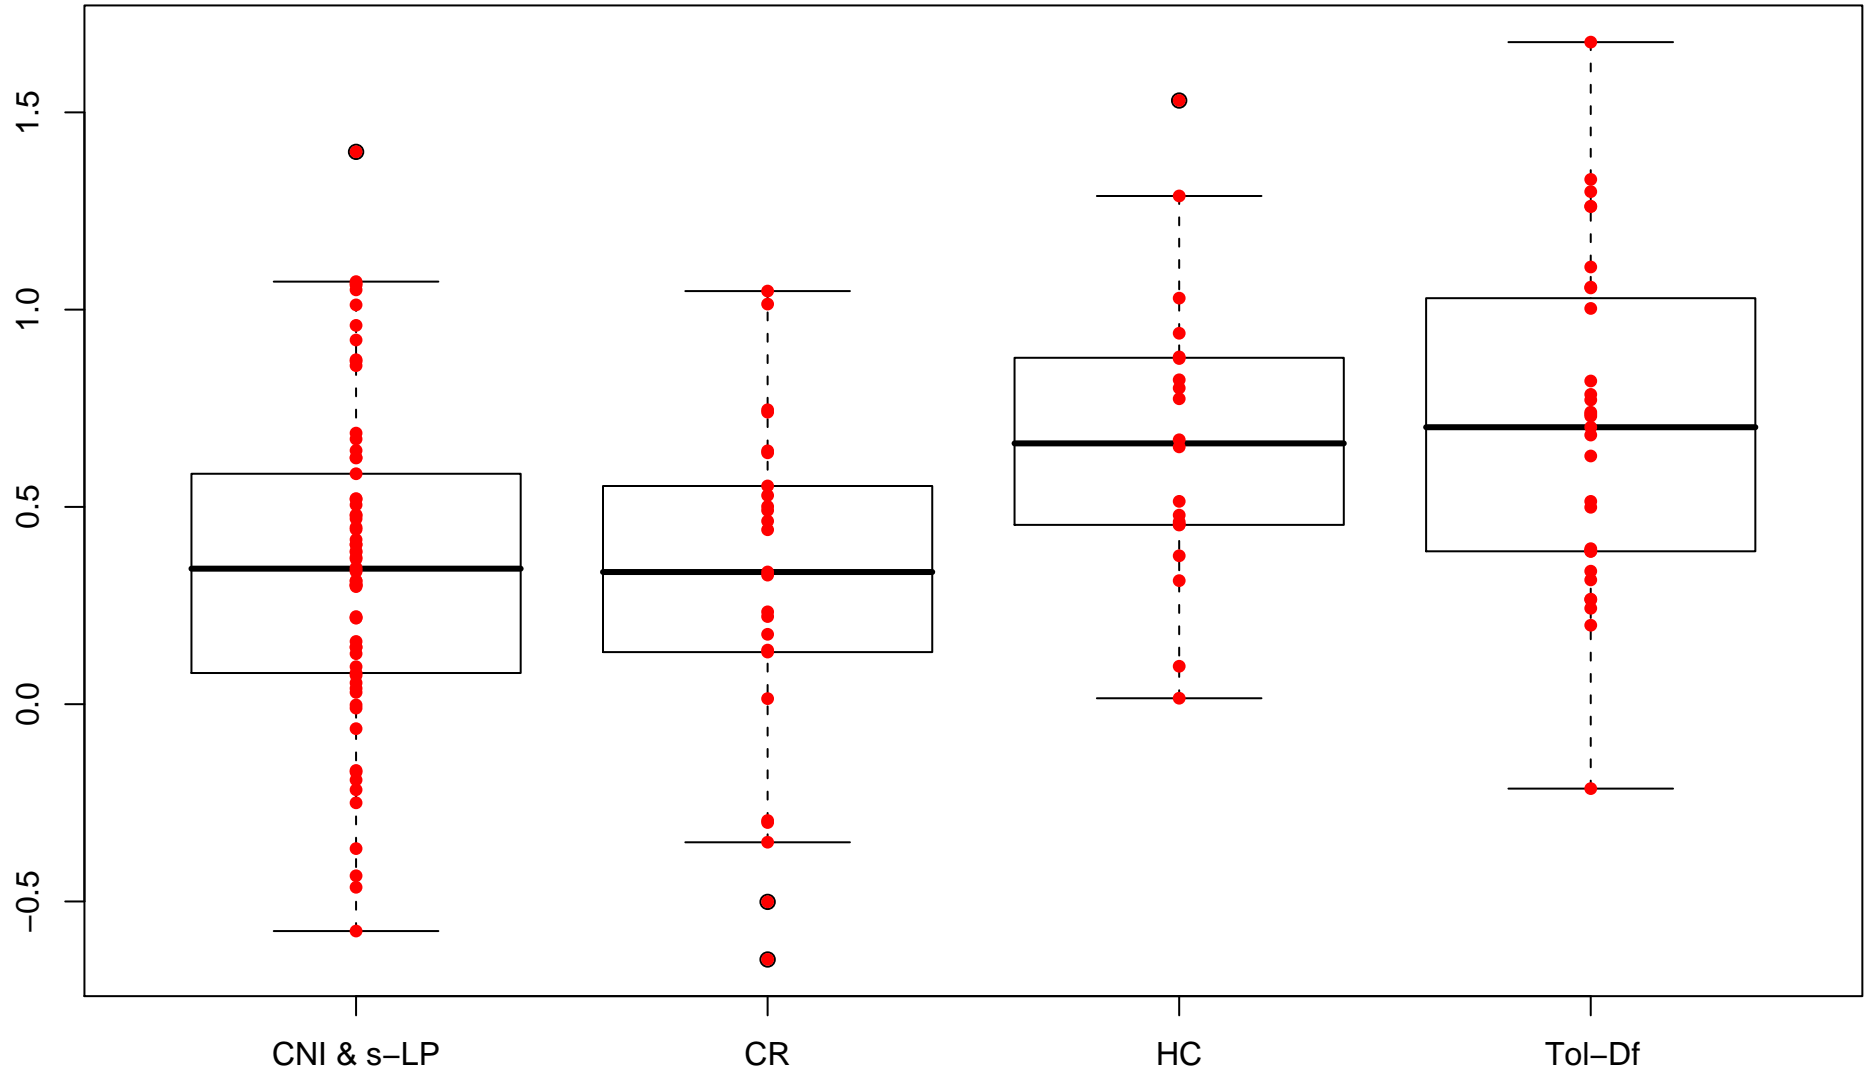

Rank 462 : AF113698

0.0001827

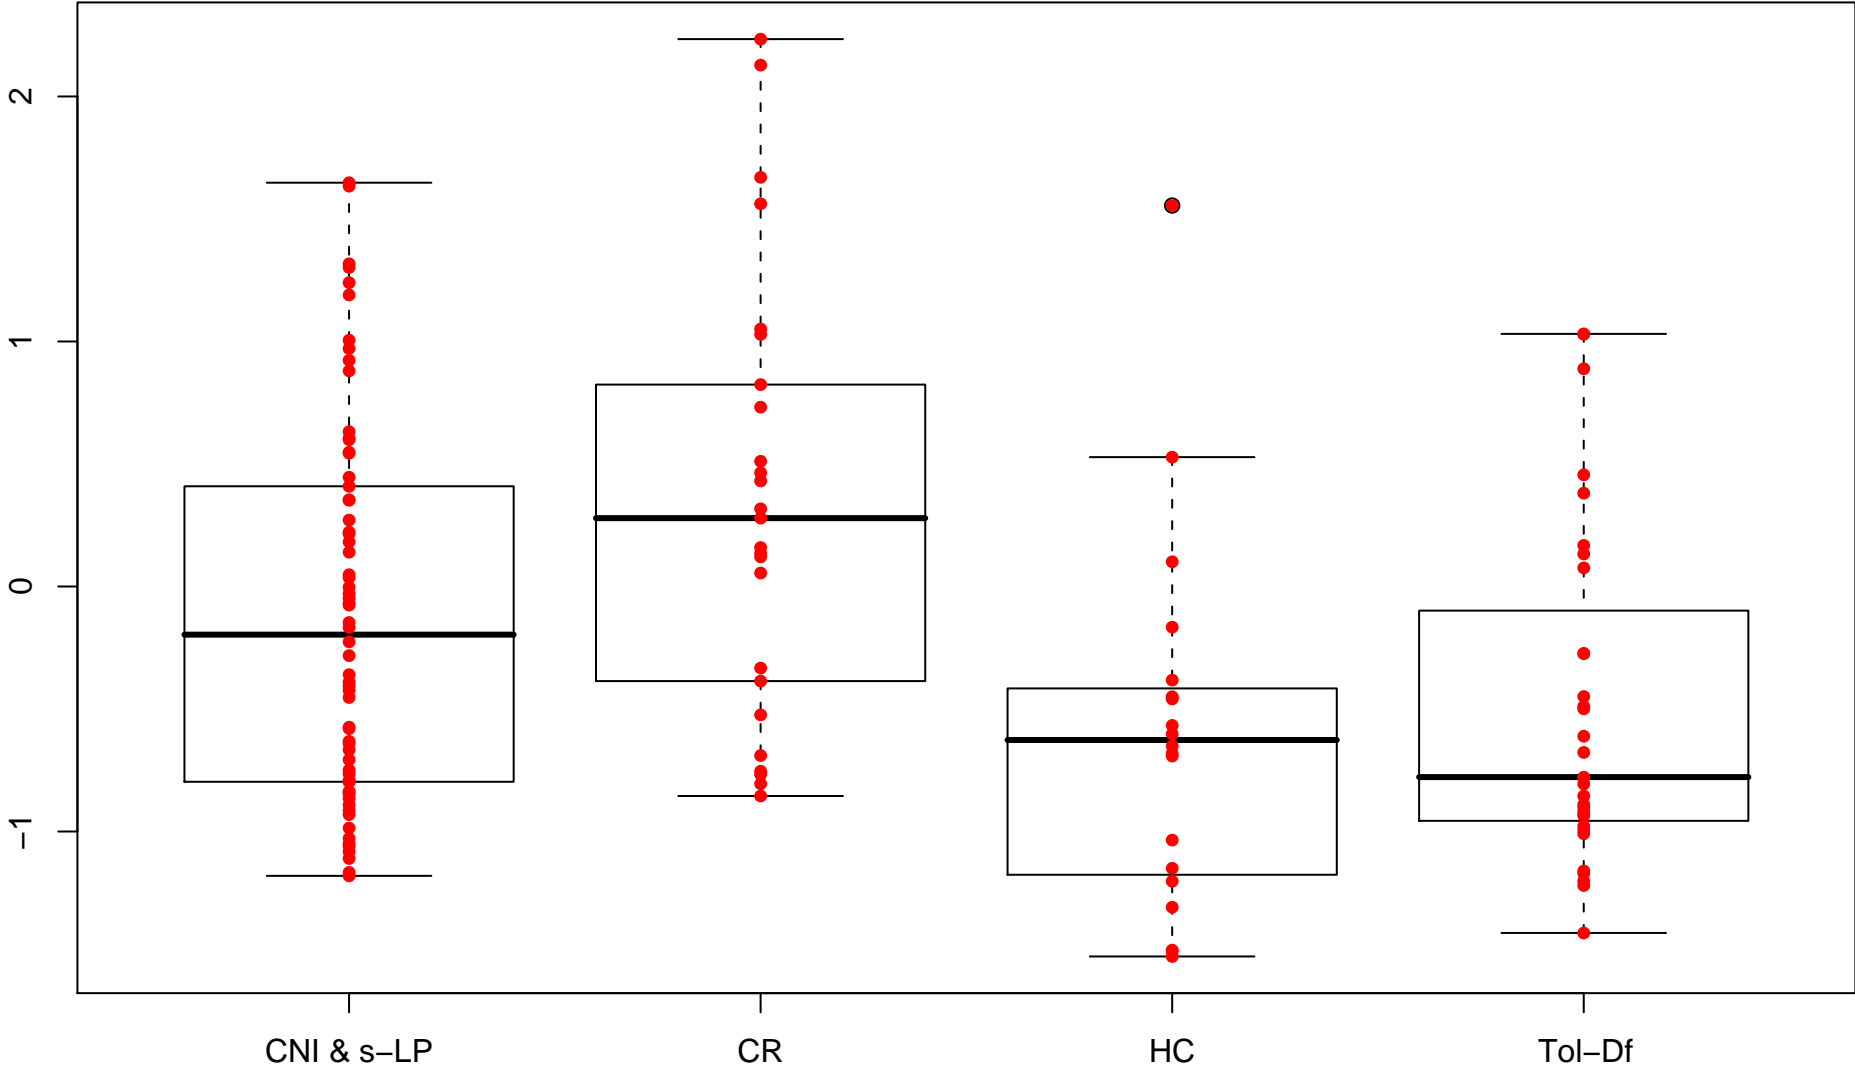

Rank 463 : TCIRG1  
0.00018543

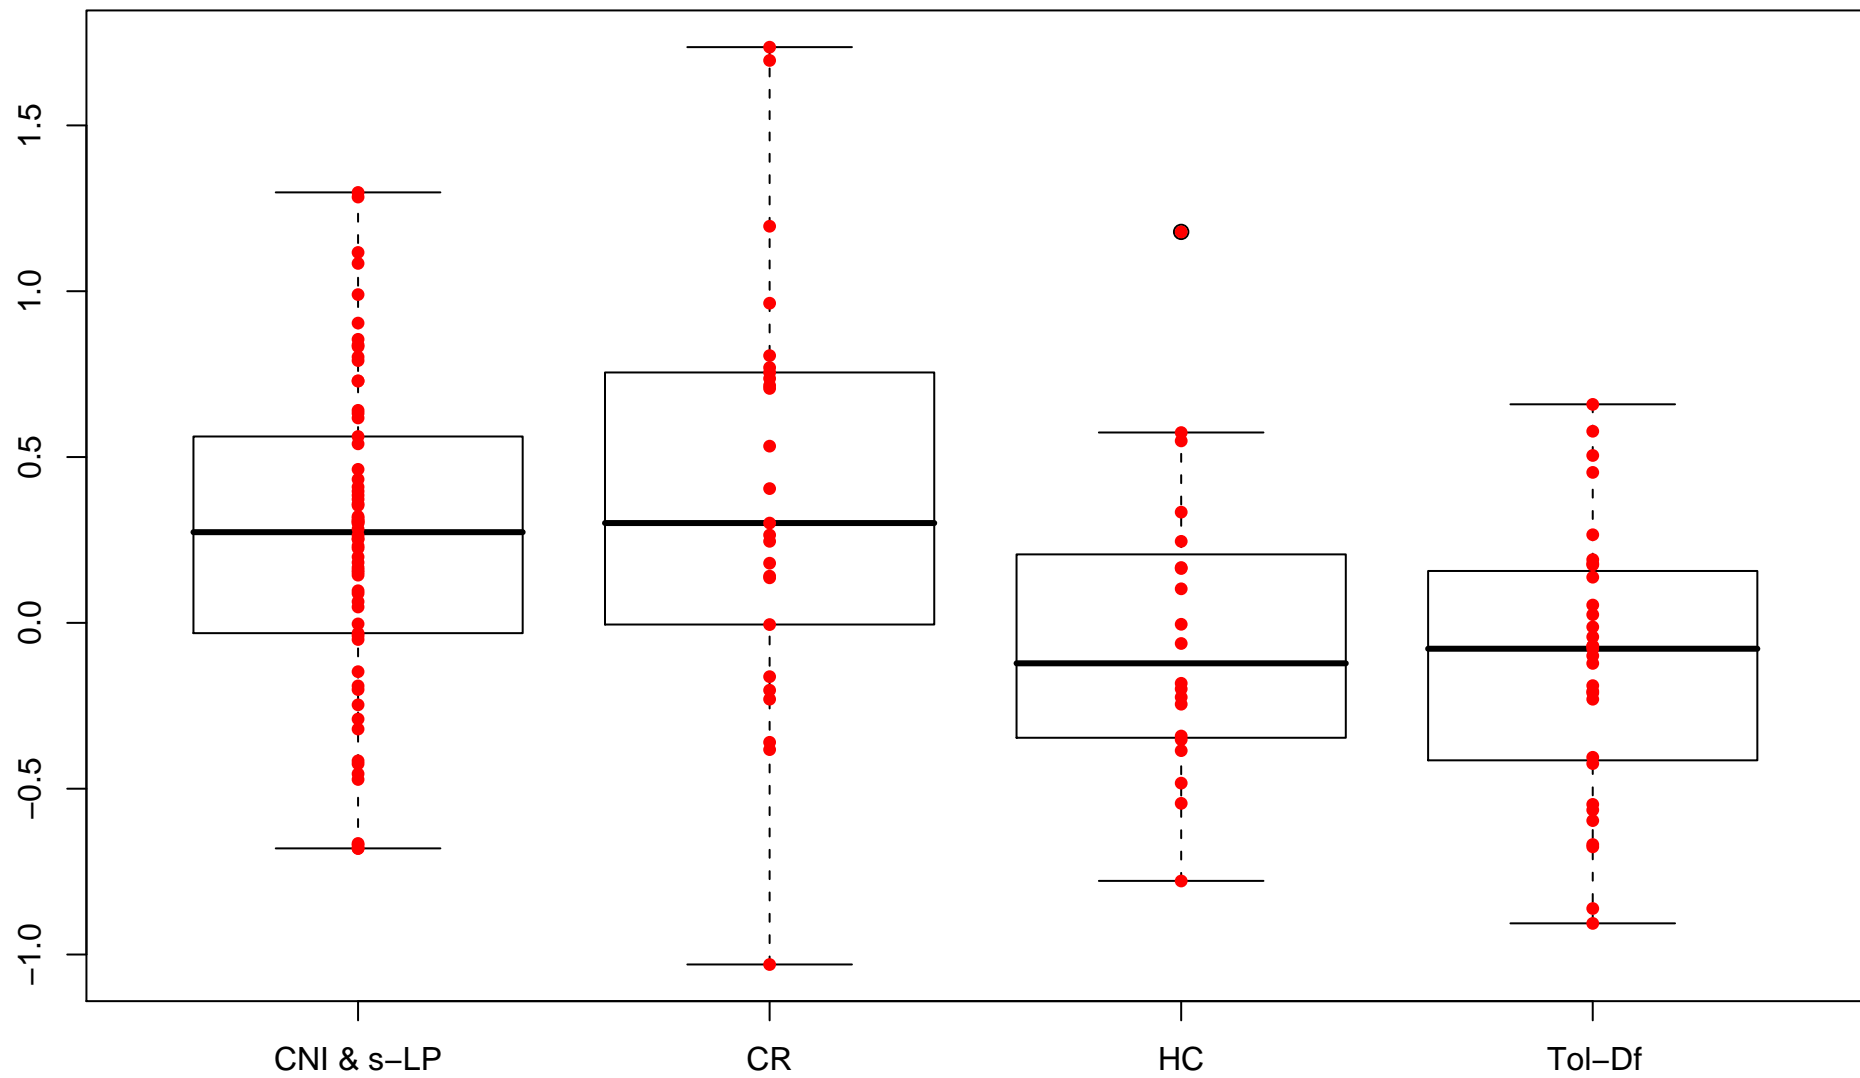



Rank 464 : CLCF1  
0.00018708

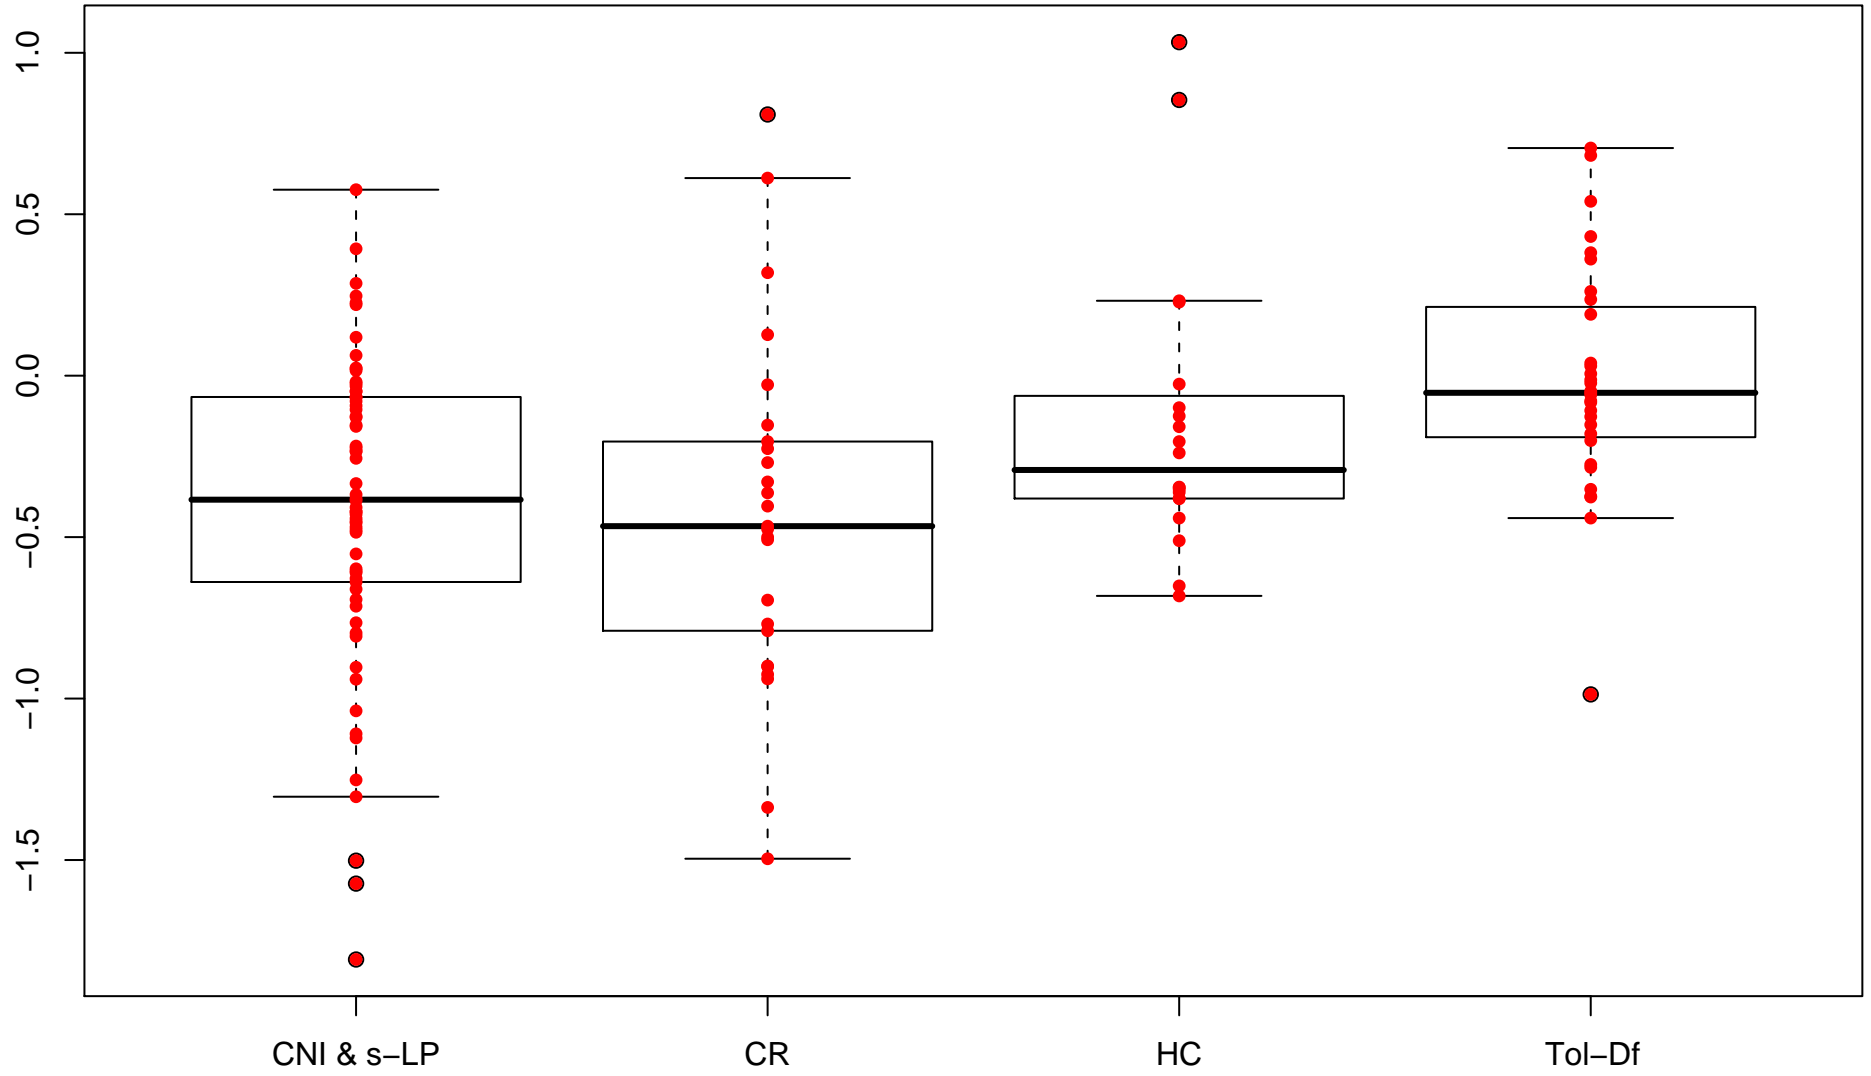

Rank 465 : KLF1  
0.00018821

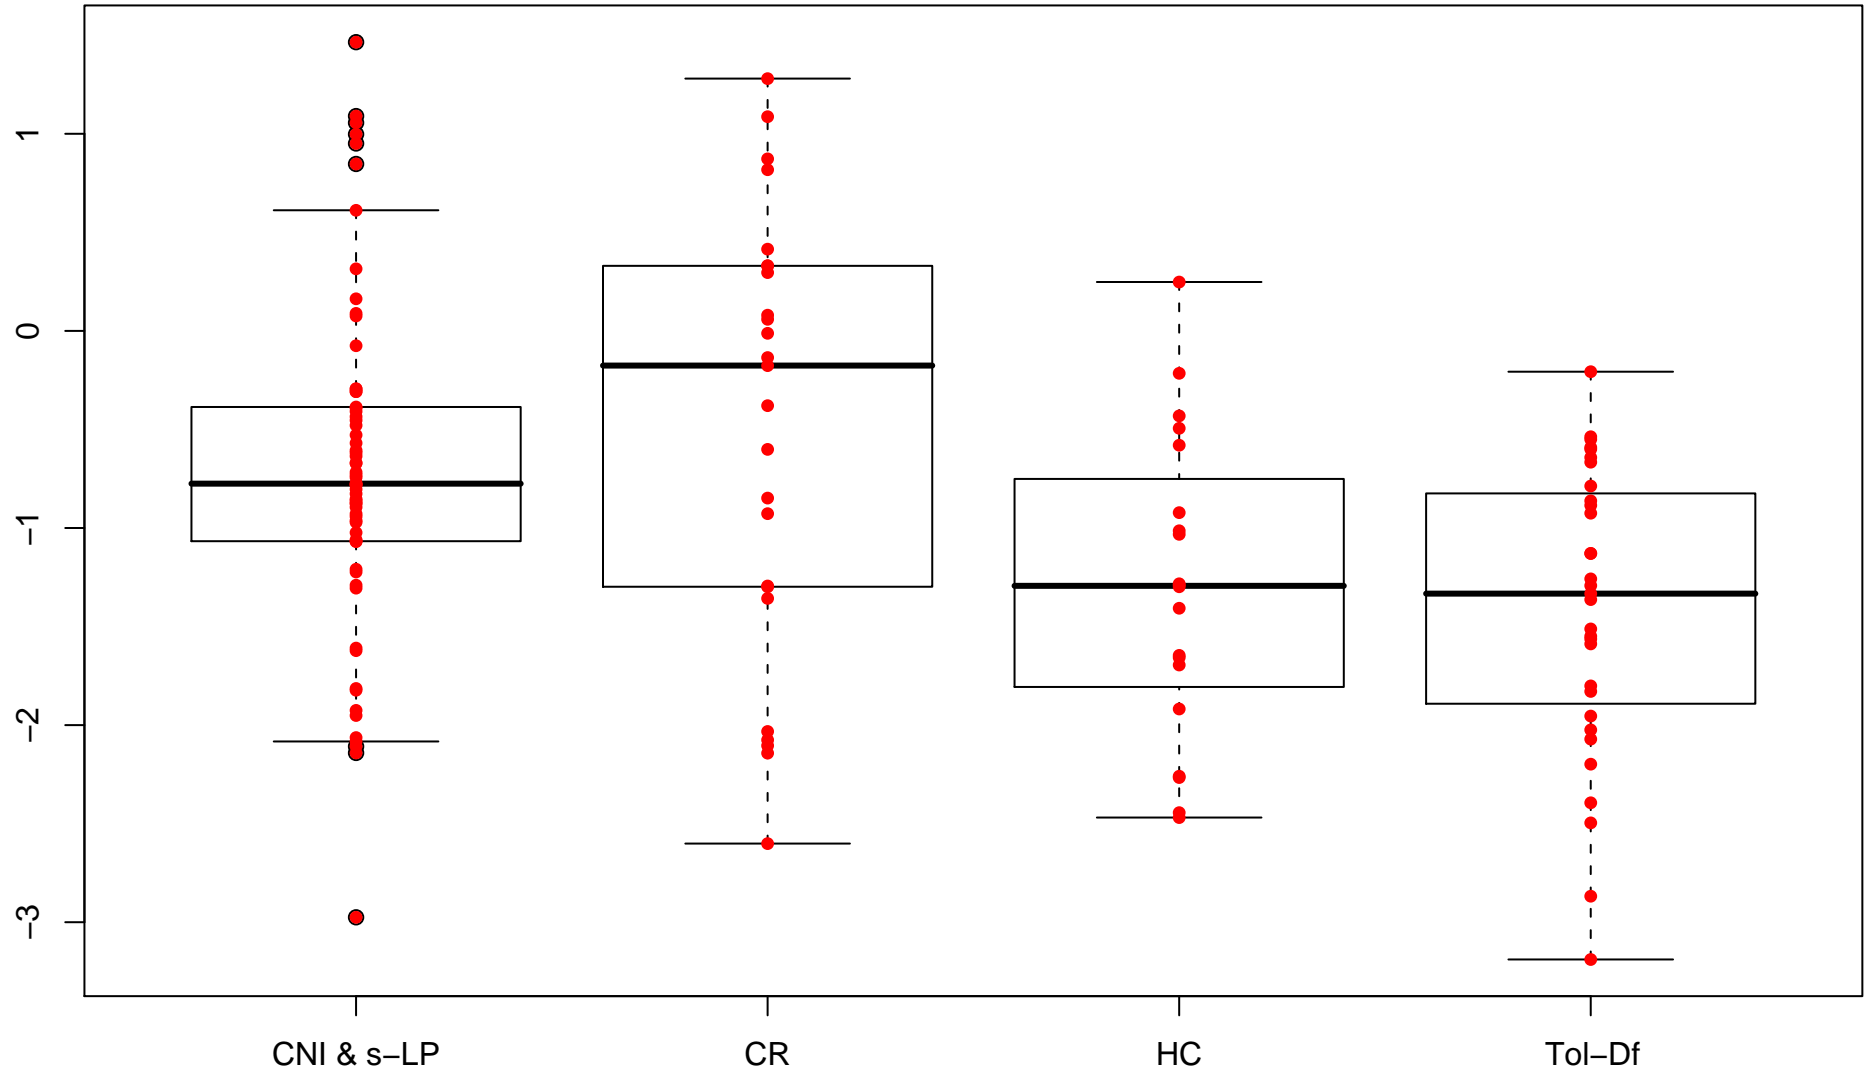

Rank 466 : MGC24039  
0.00019249

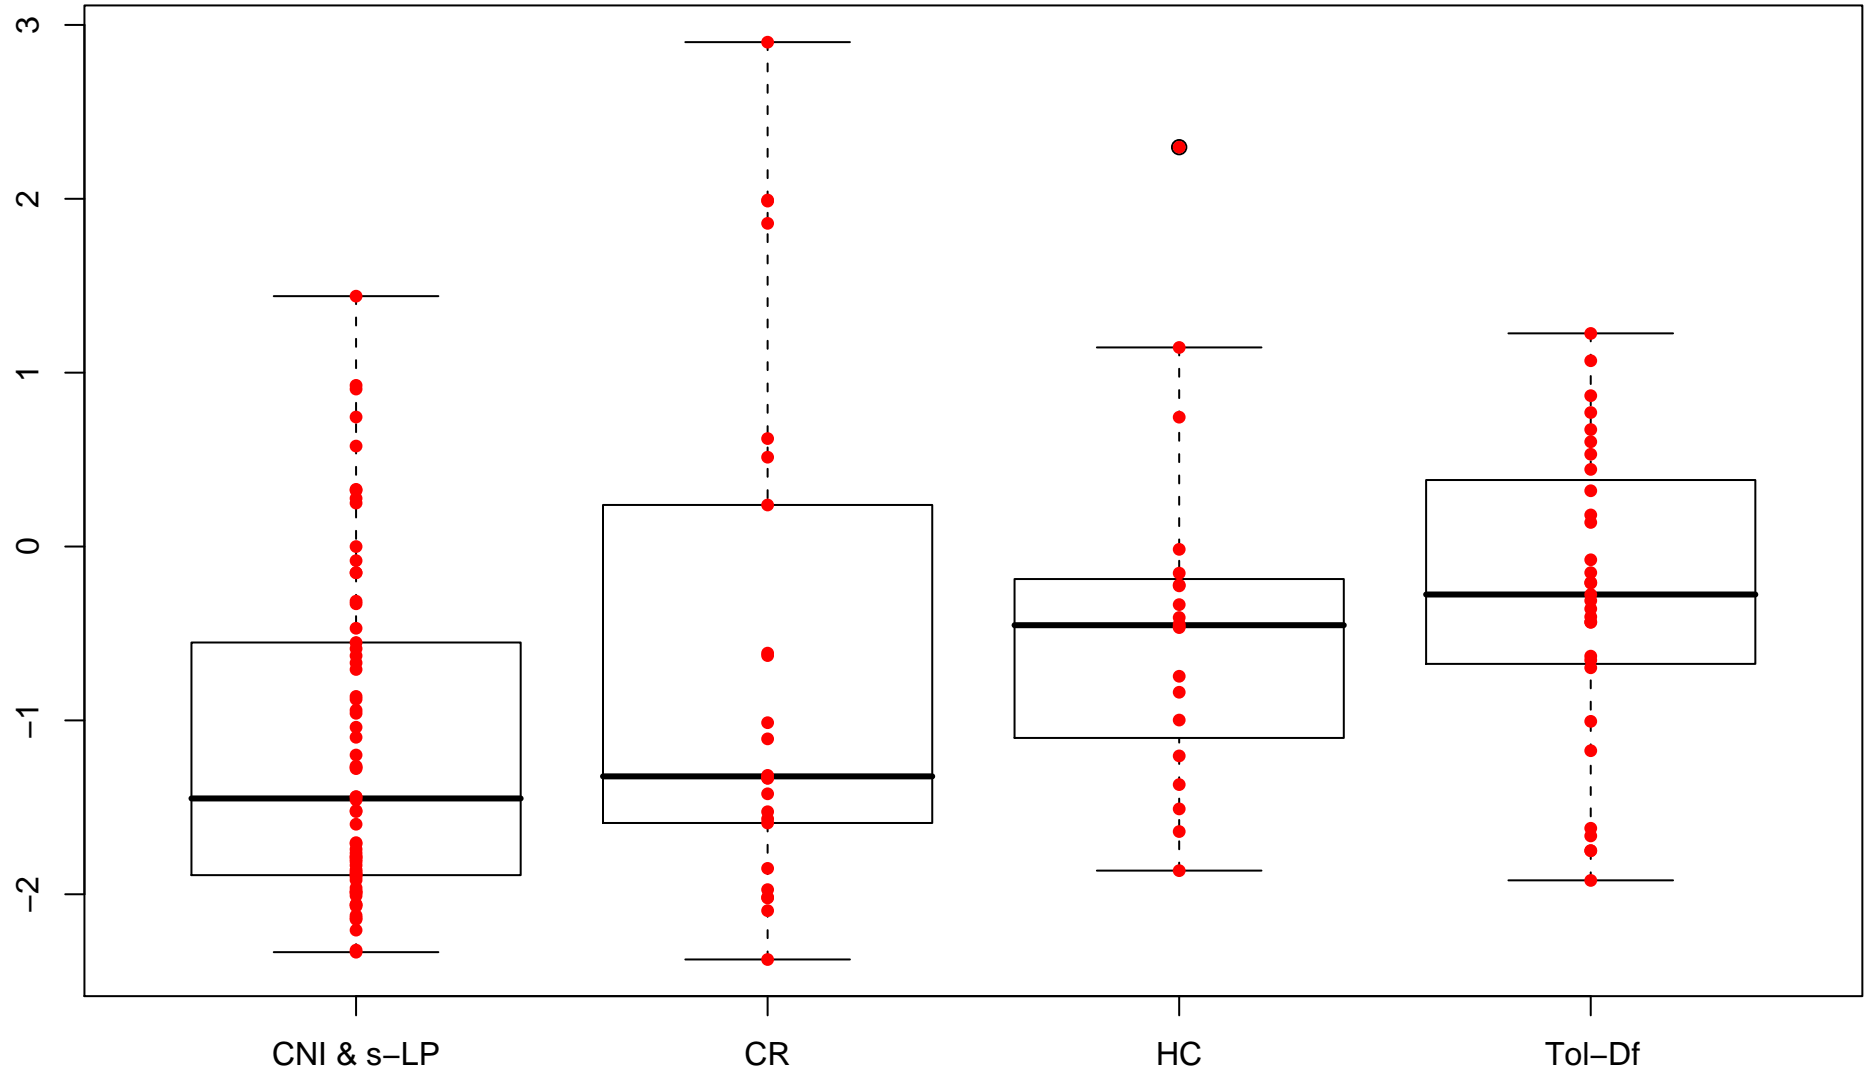

Rank 467 : NFE2  
0.00019352

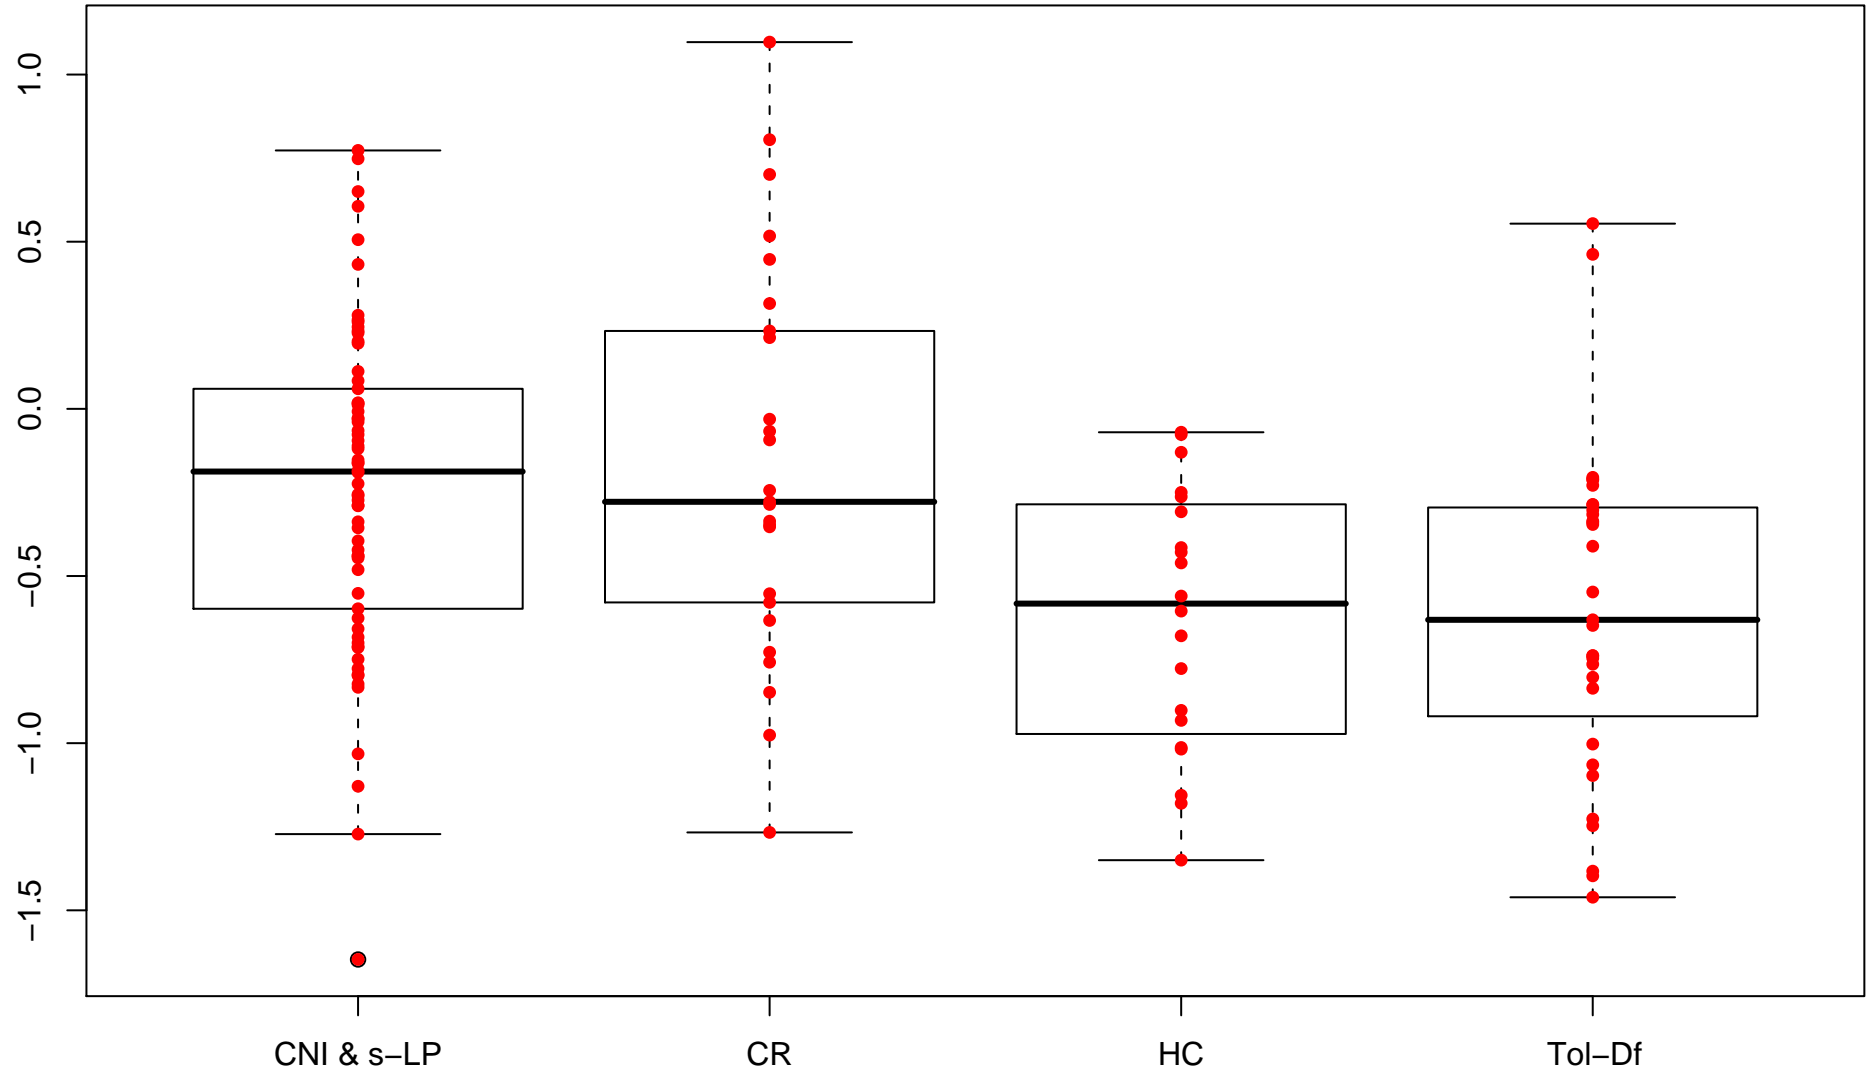

Rank 468 : PFKM  
0.00019439

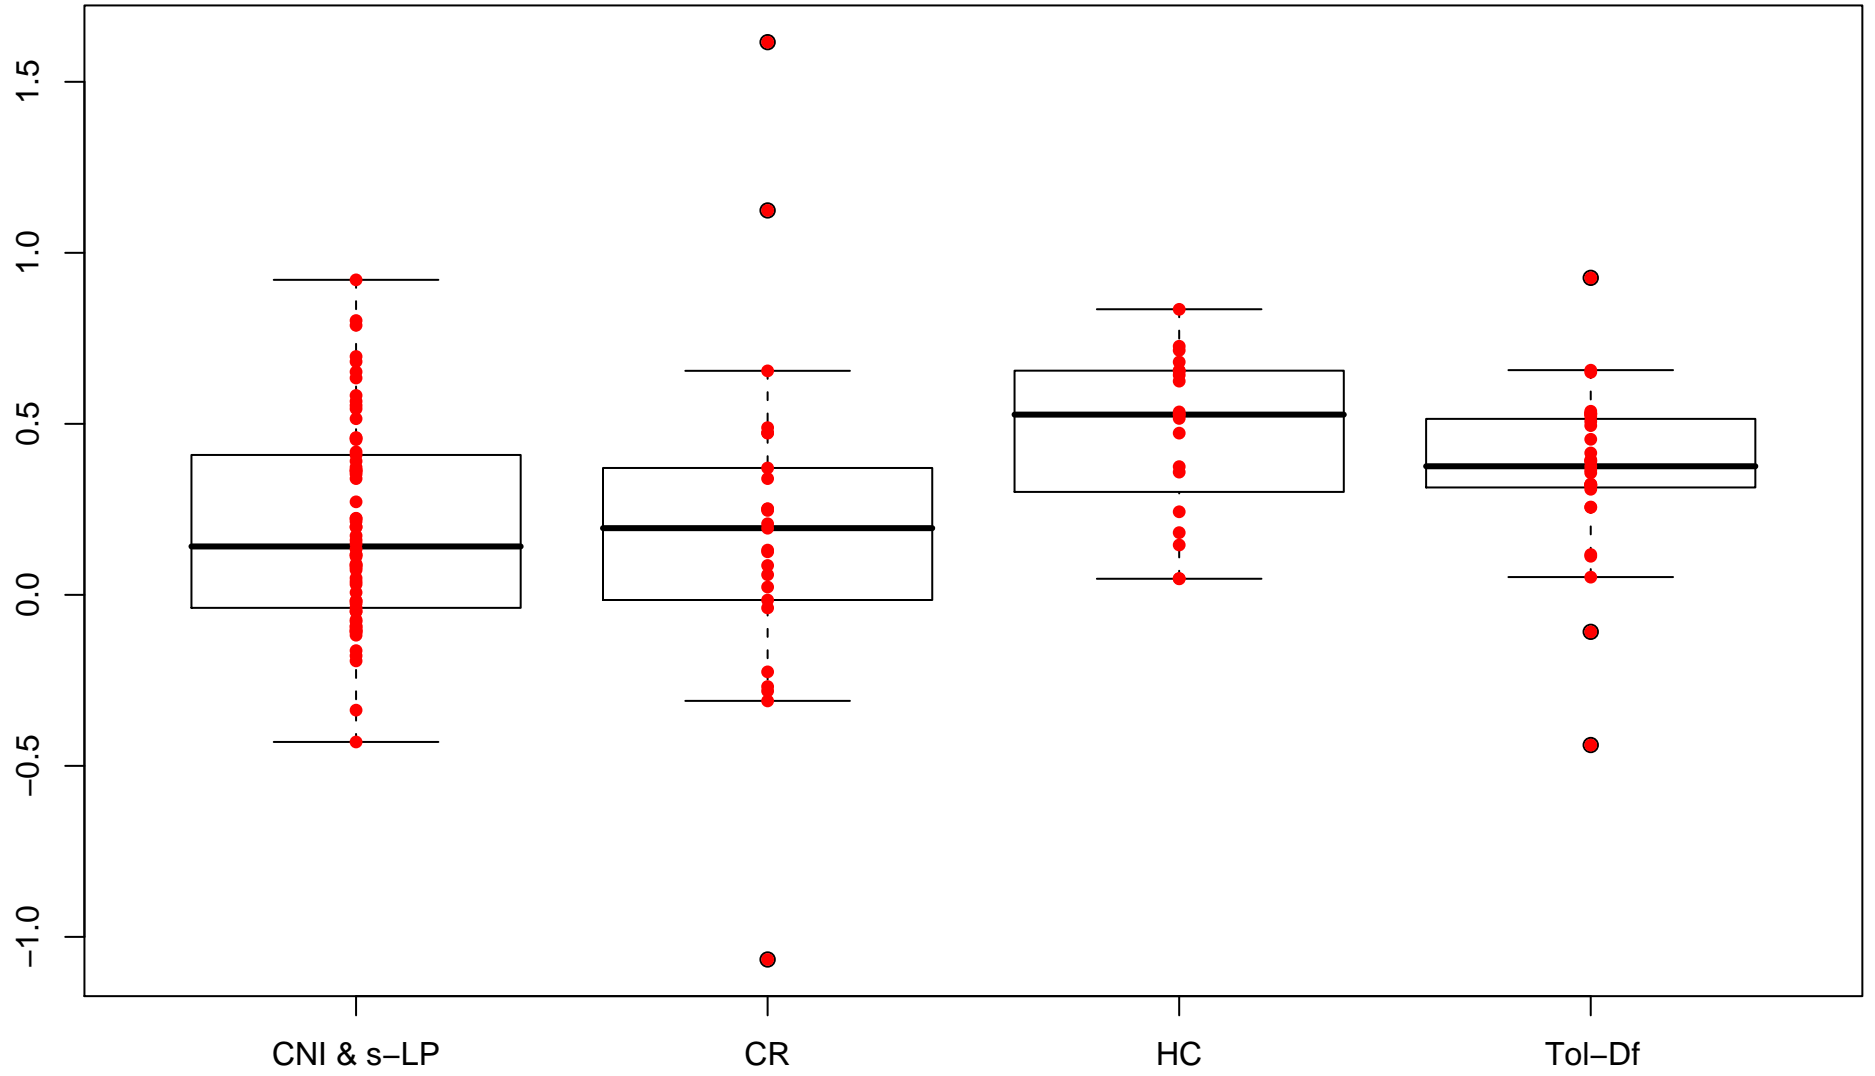

Rank 469 : PLCL1  
0.00019563

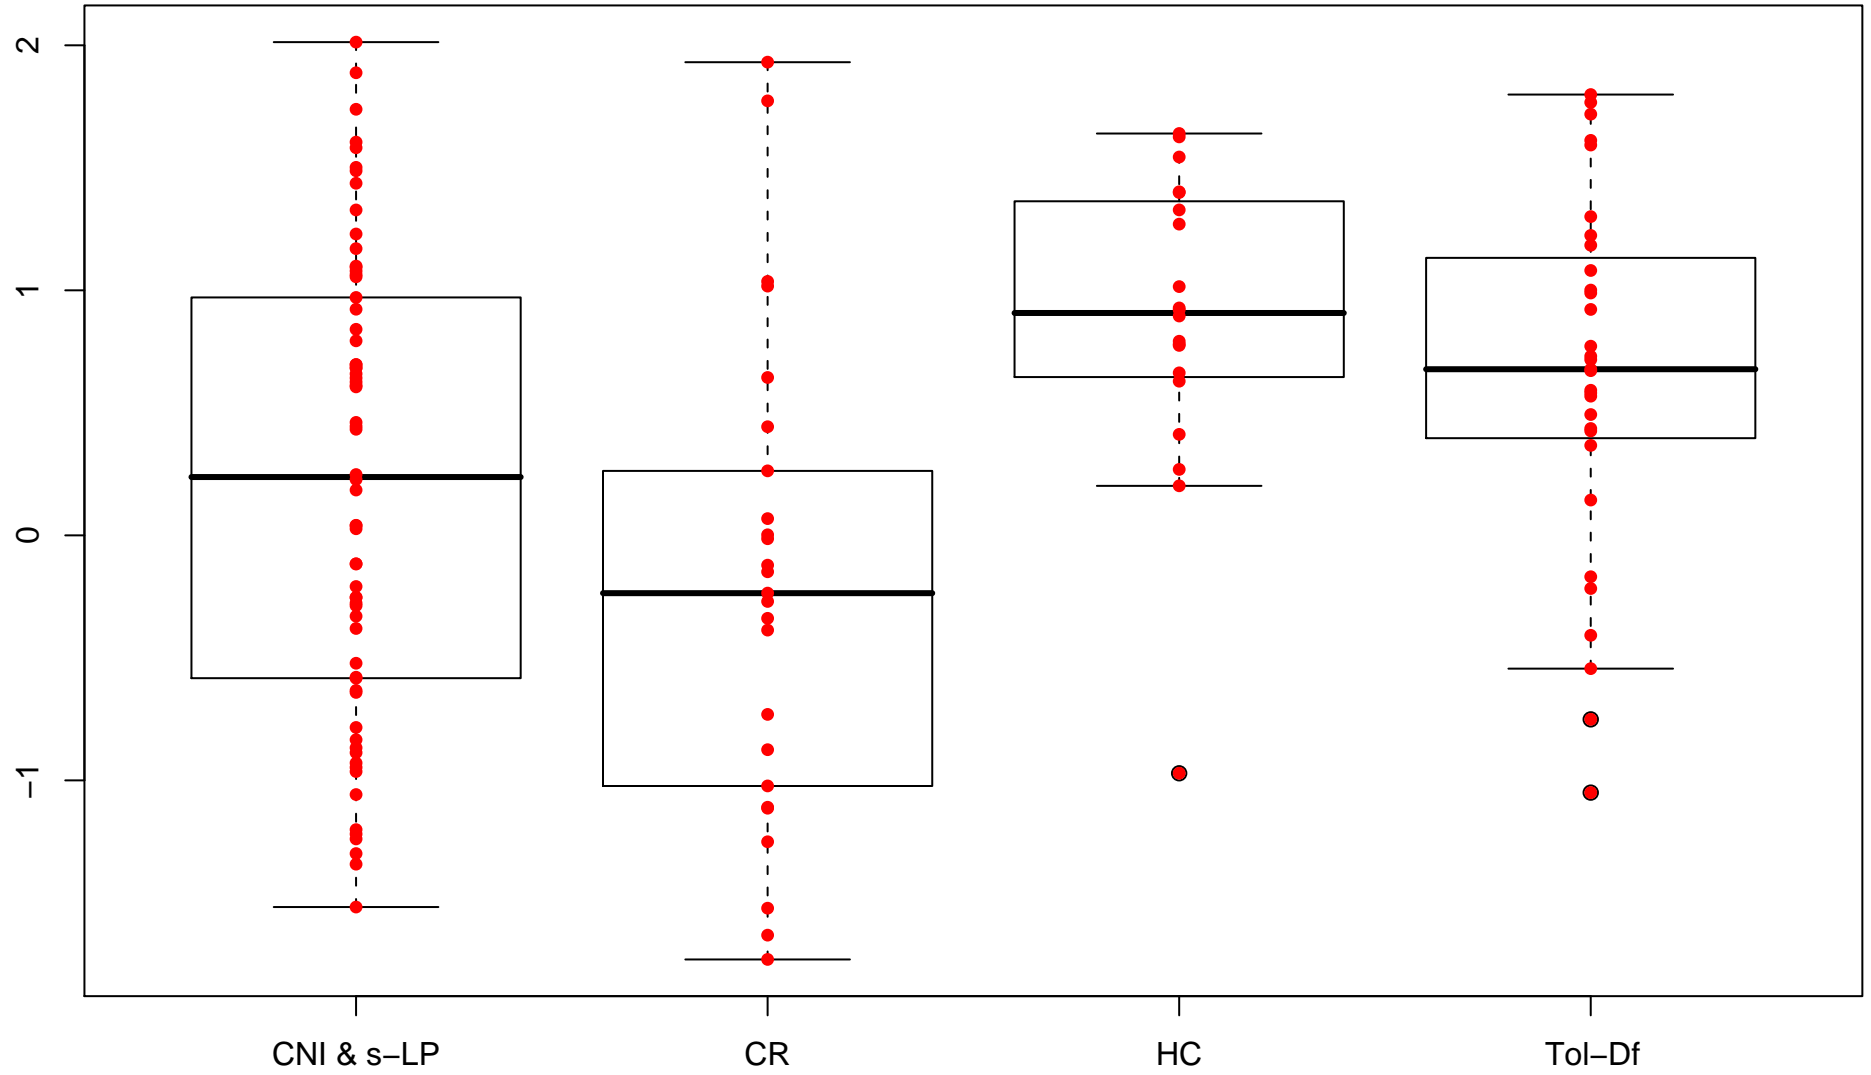

Rank 470 : CCR8  
0.00019653

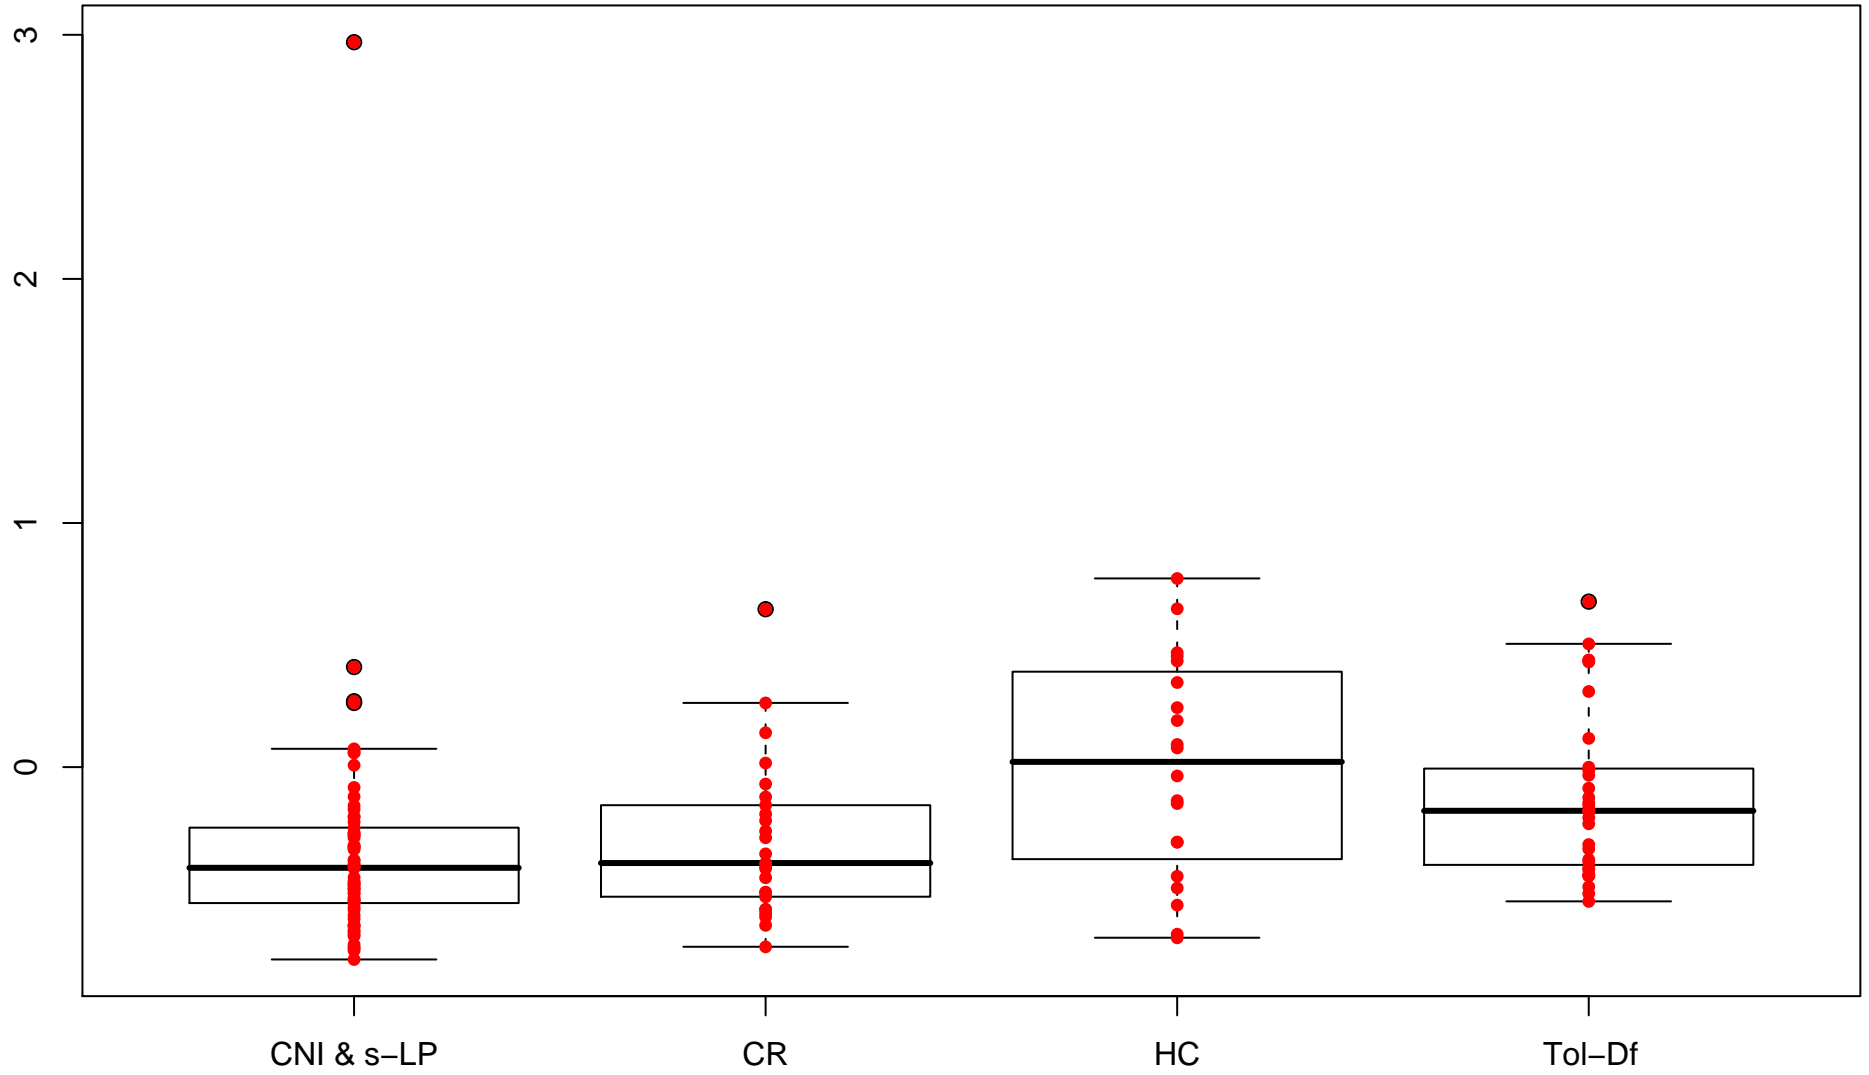

Rank 471 : CKB  
0.00020039

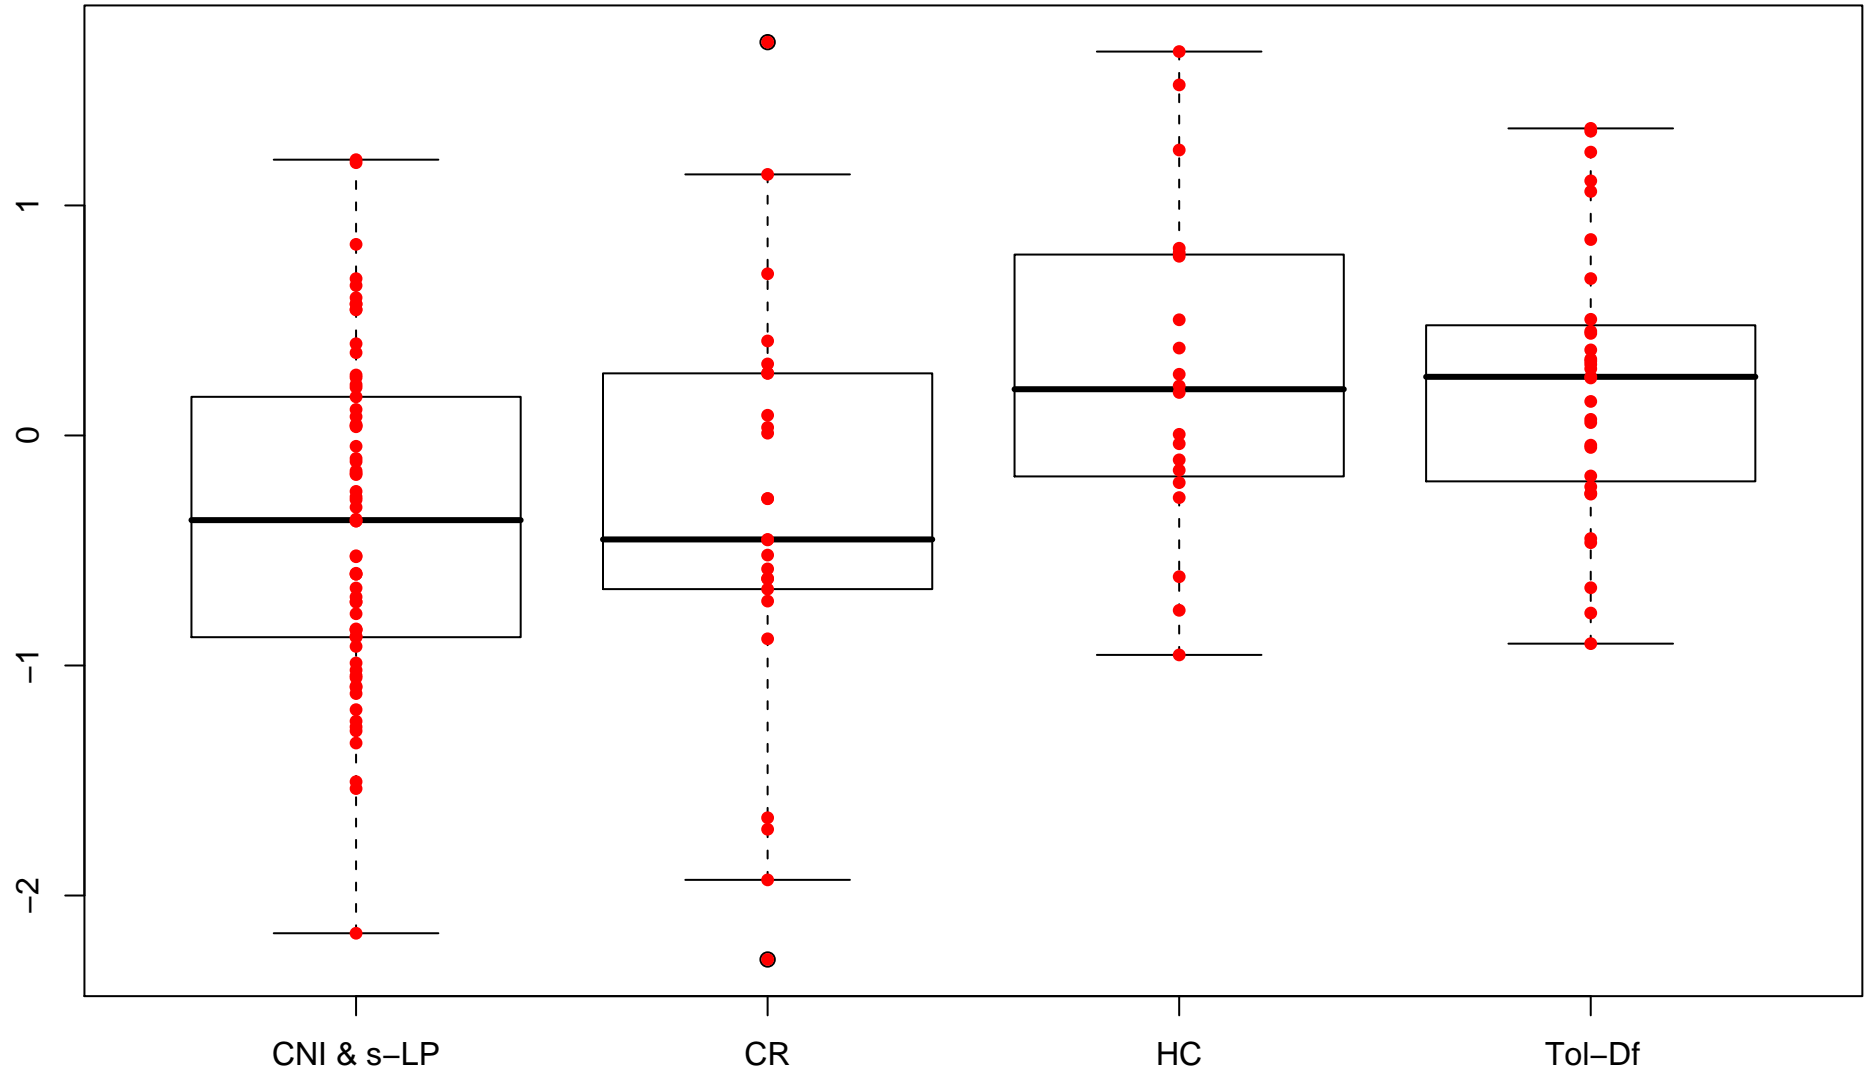



Rank 472 : FLJ30277  
0.00020198

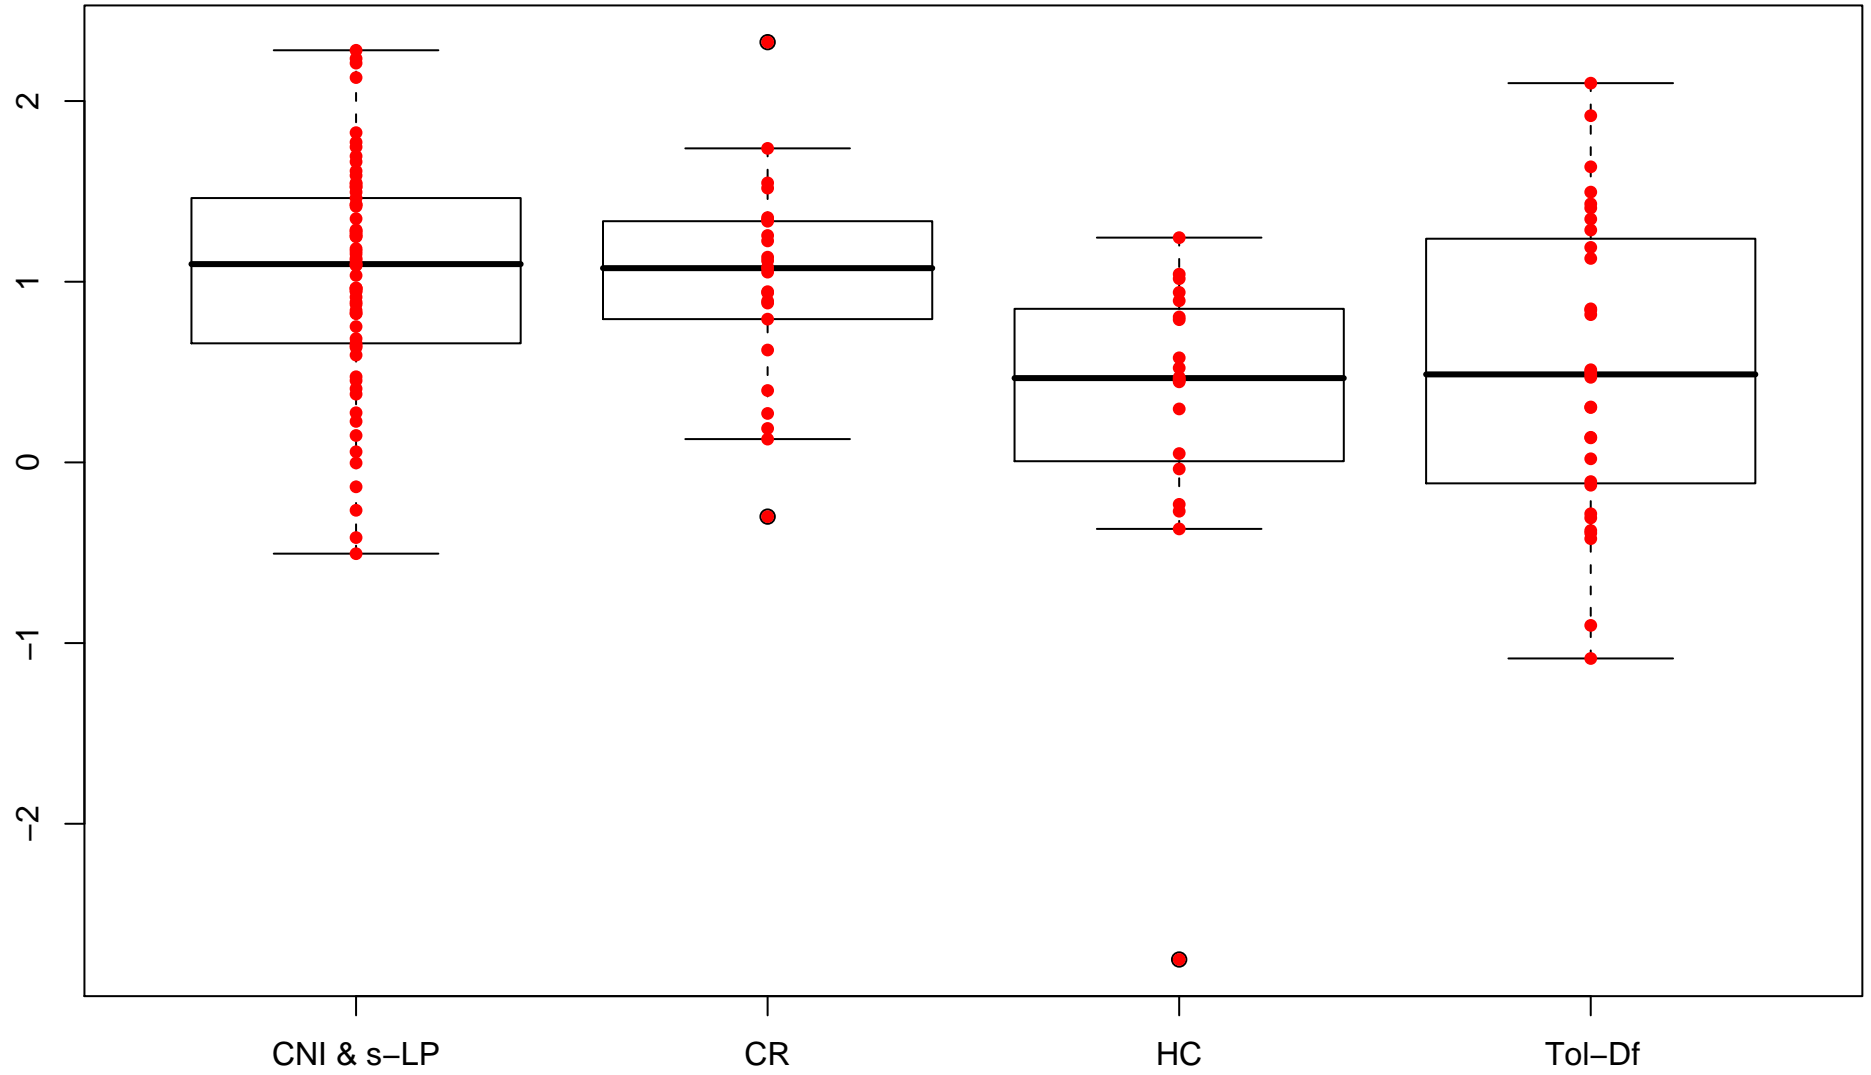

Rank 473 : C20ORF103  
0.00020703

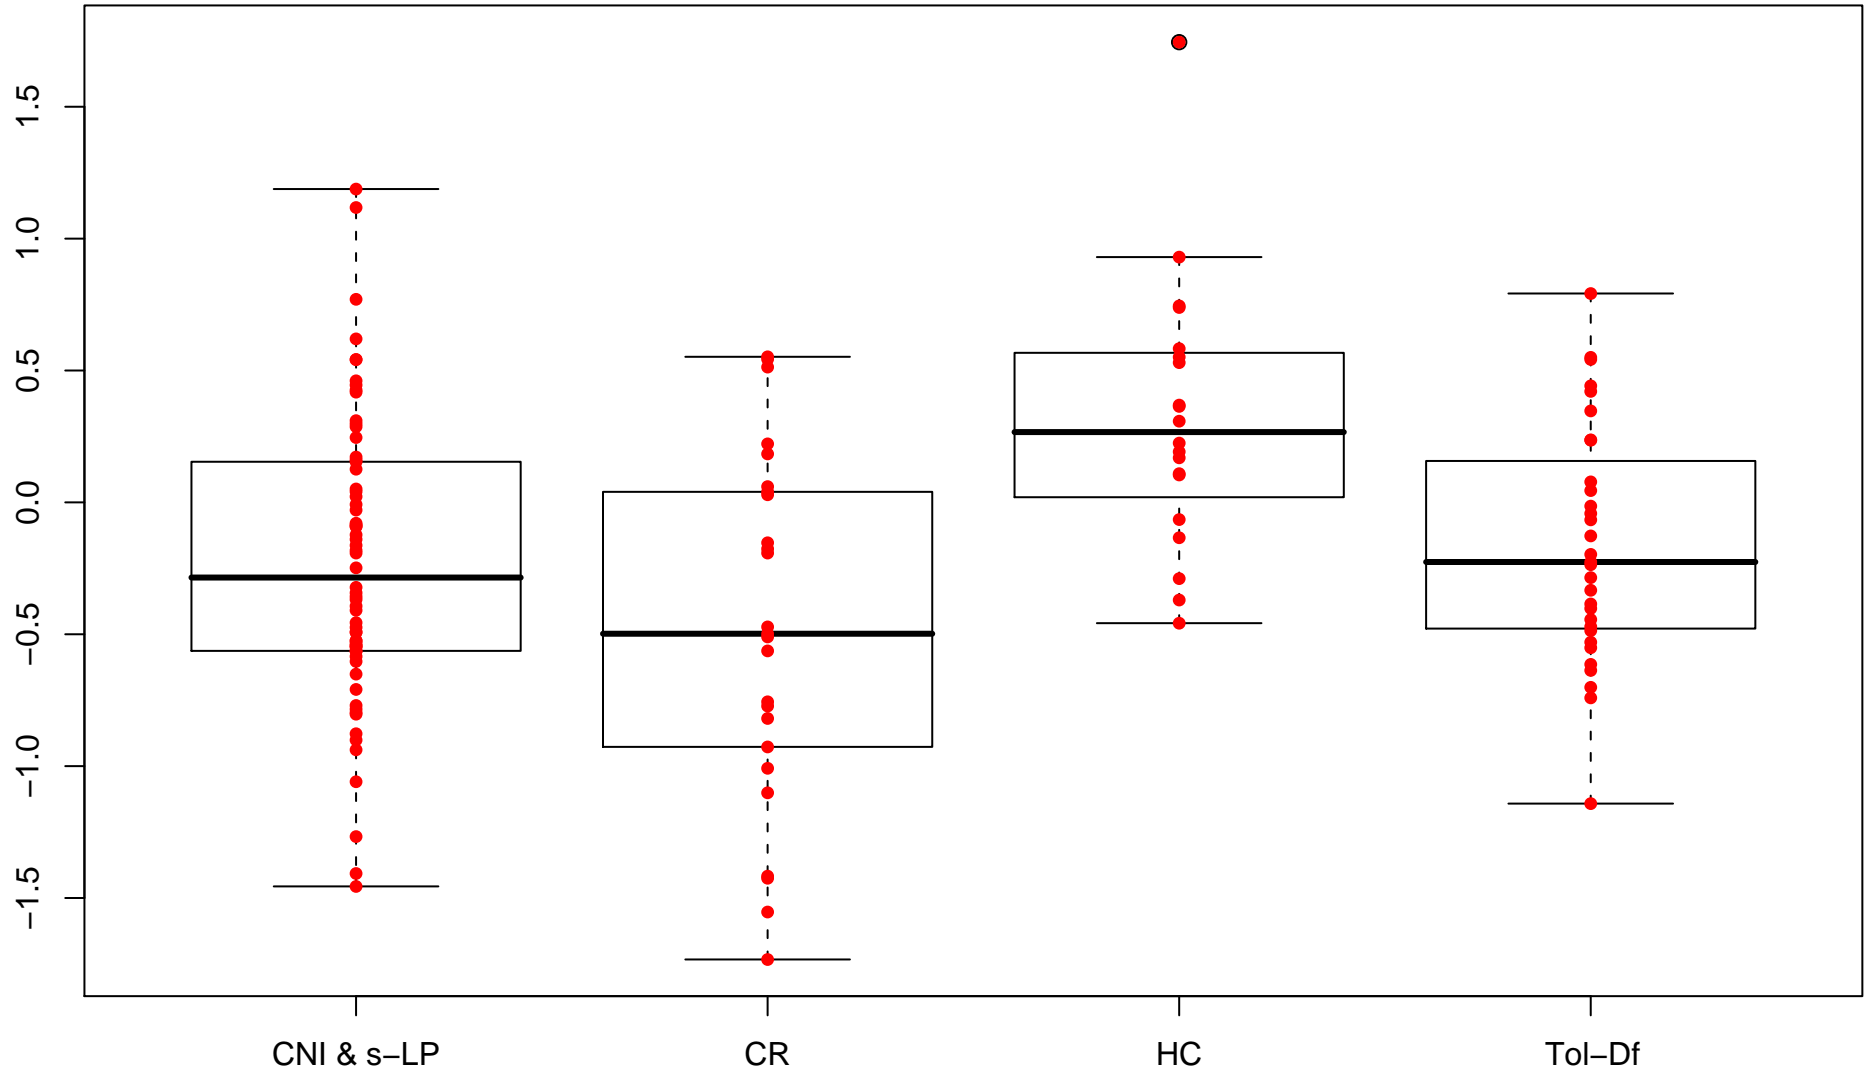

Rank 474 : LTB  
0.0002085

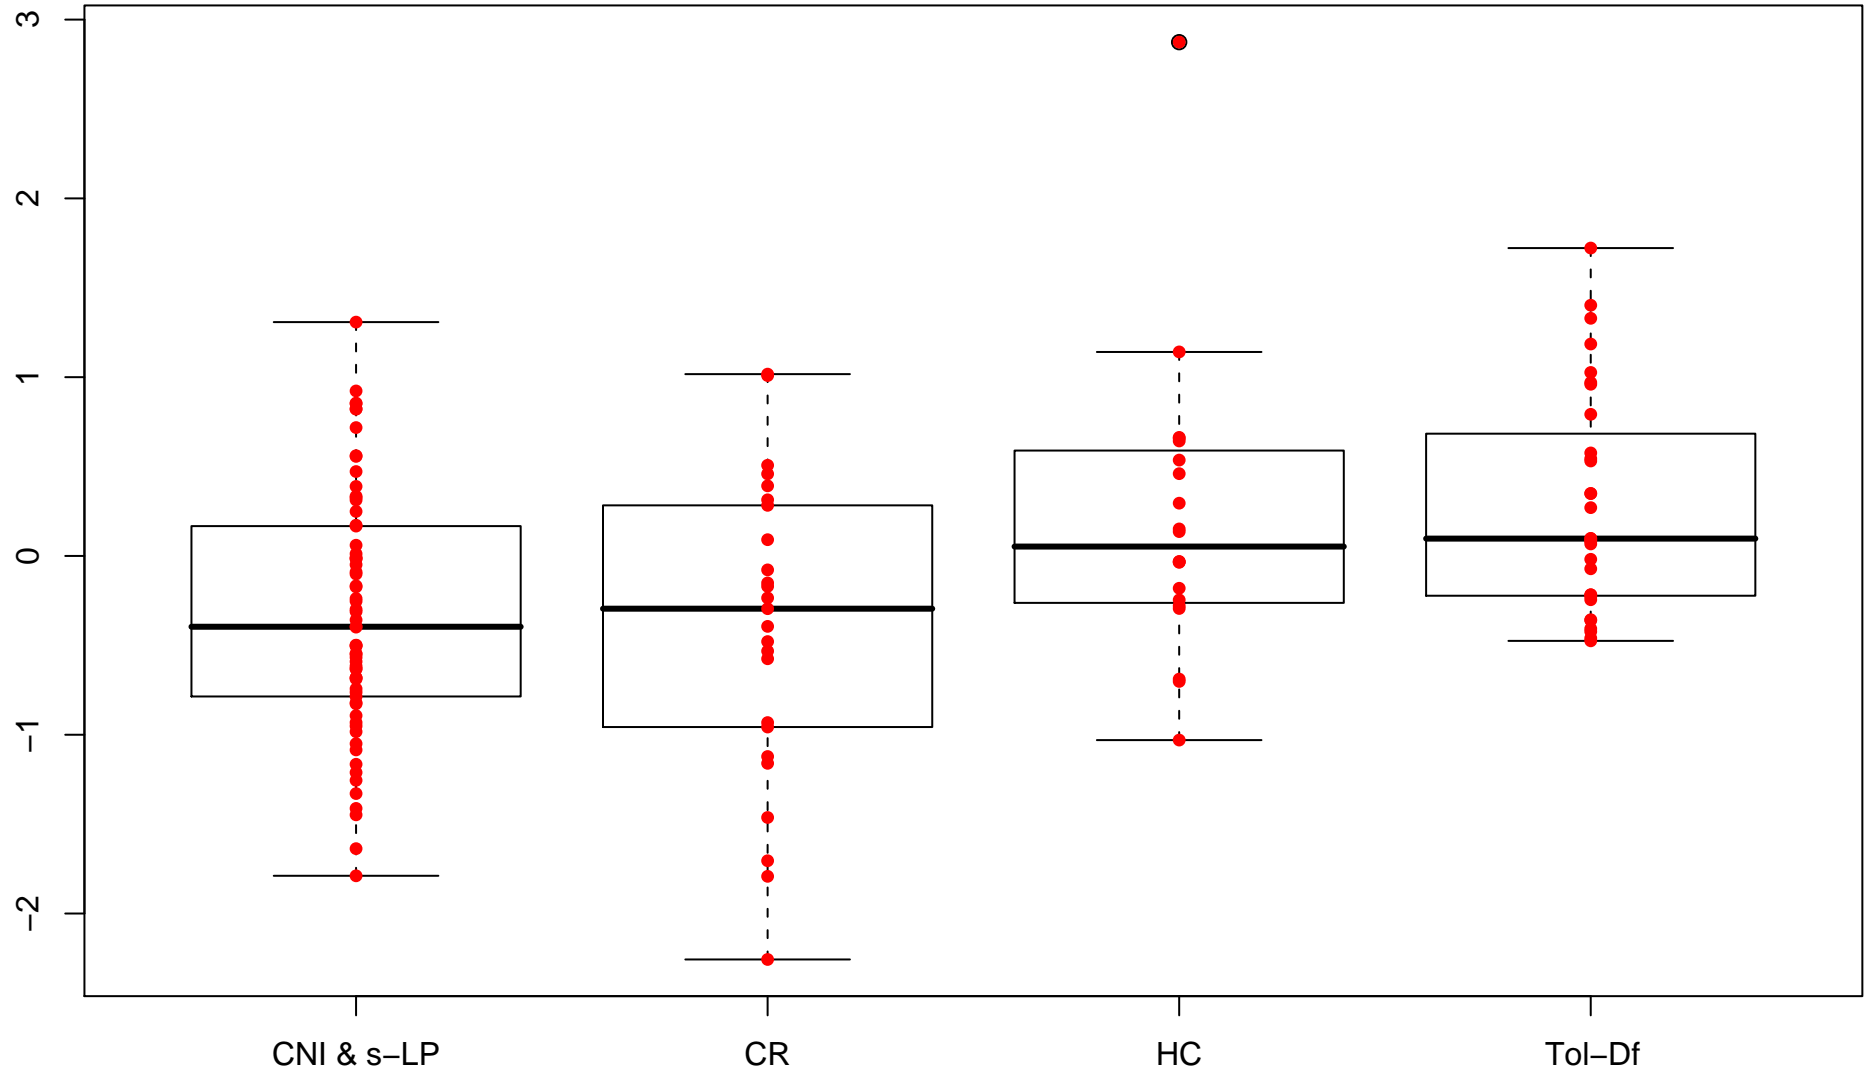

Rank 475 : CHST11  
0.00020995

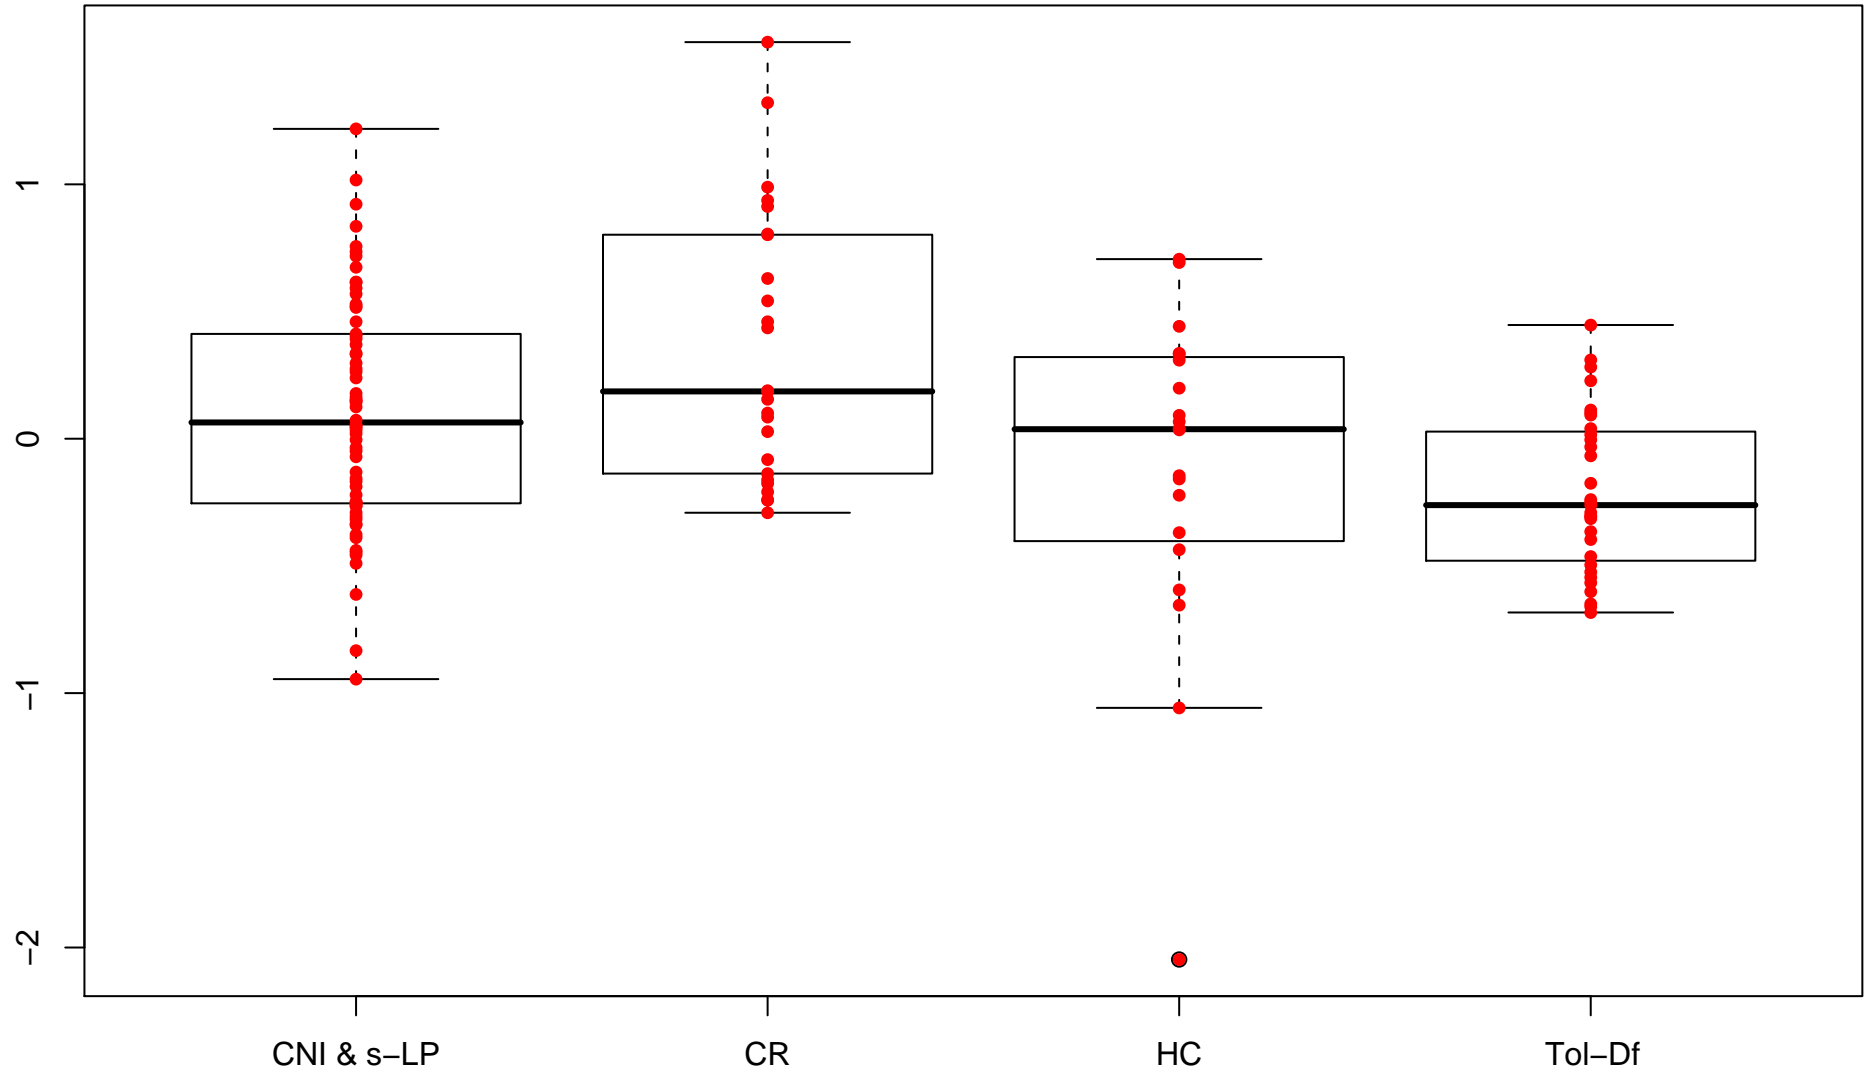

Rank 476 : CEACAM1  
0.00021023

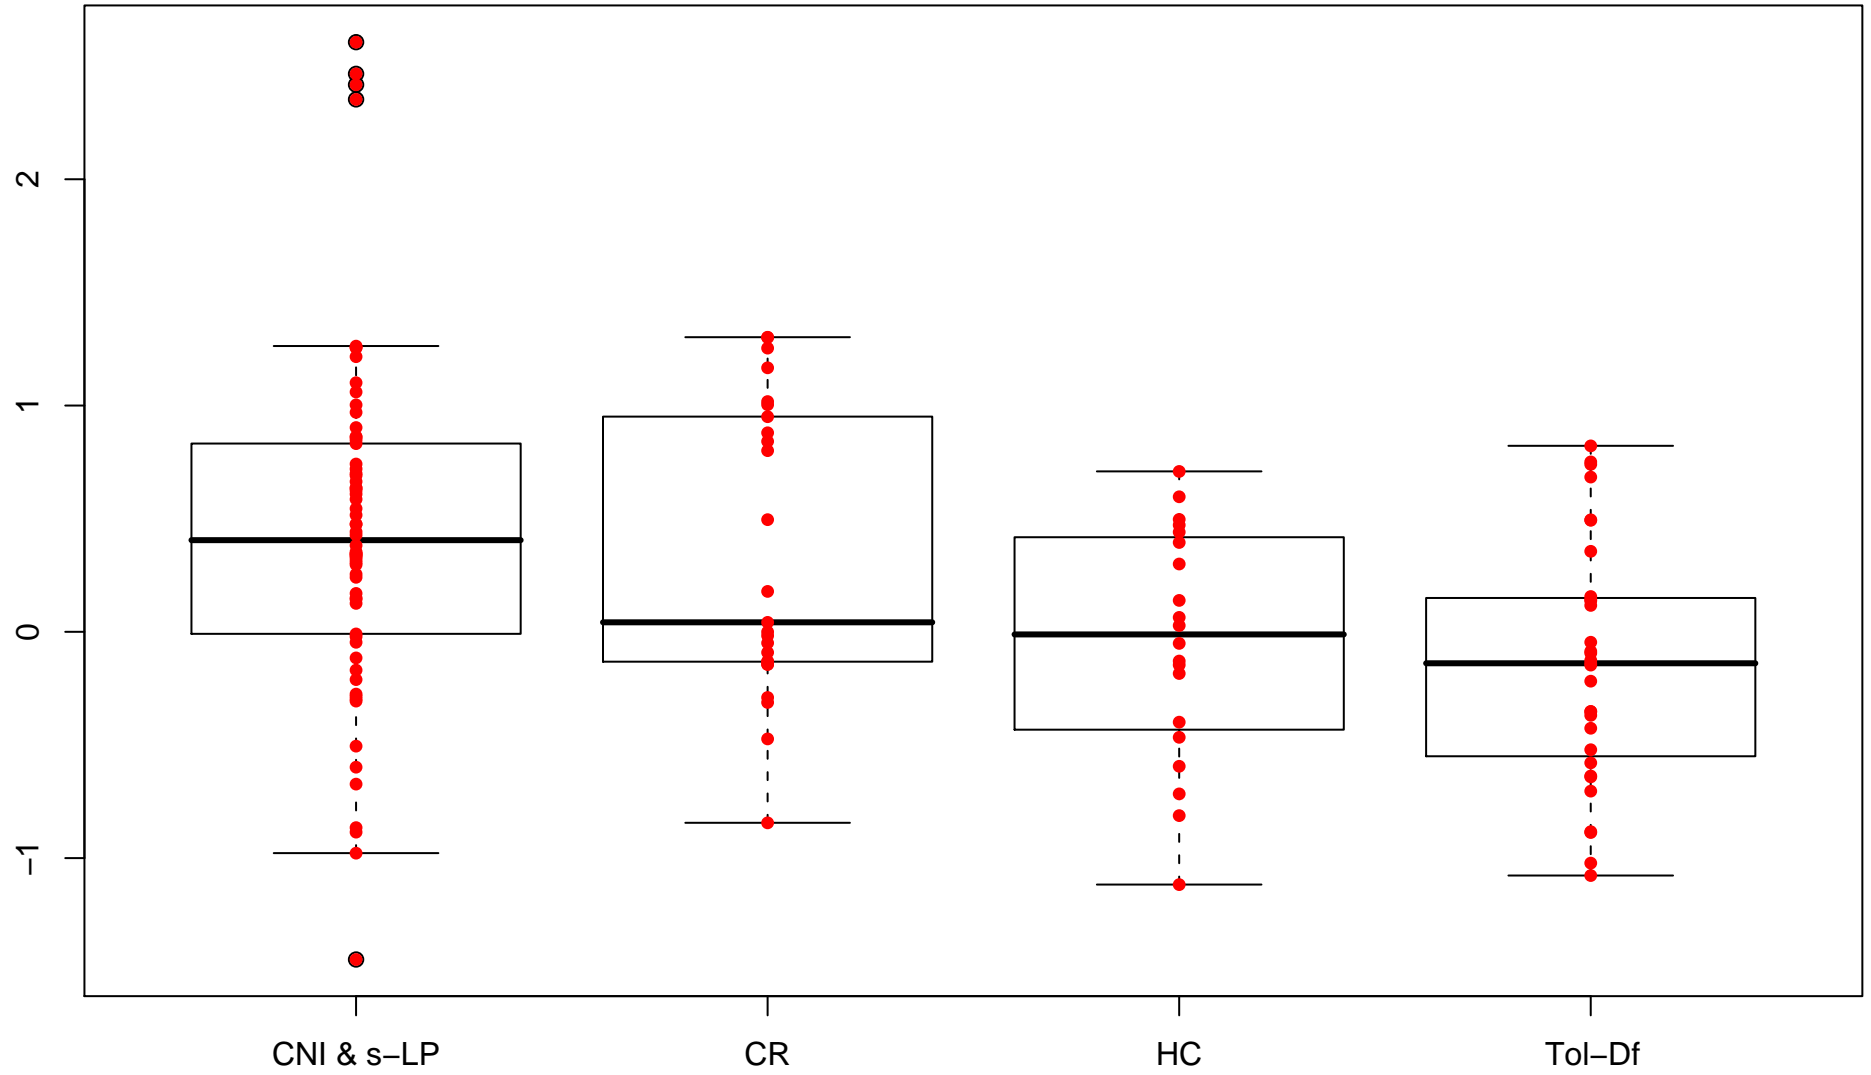

Rank 477 : CALML4  
0.00021082

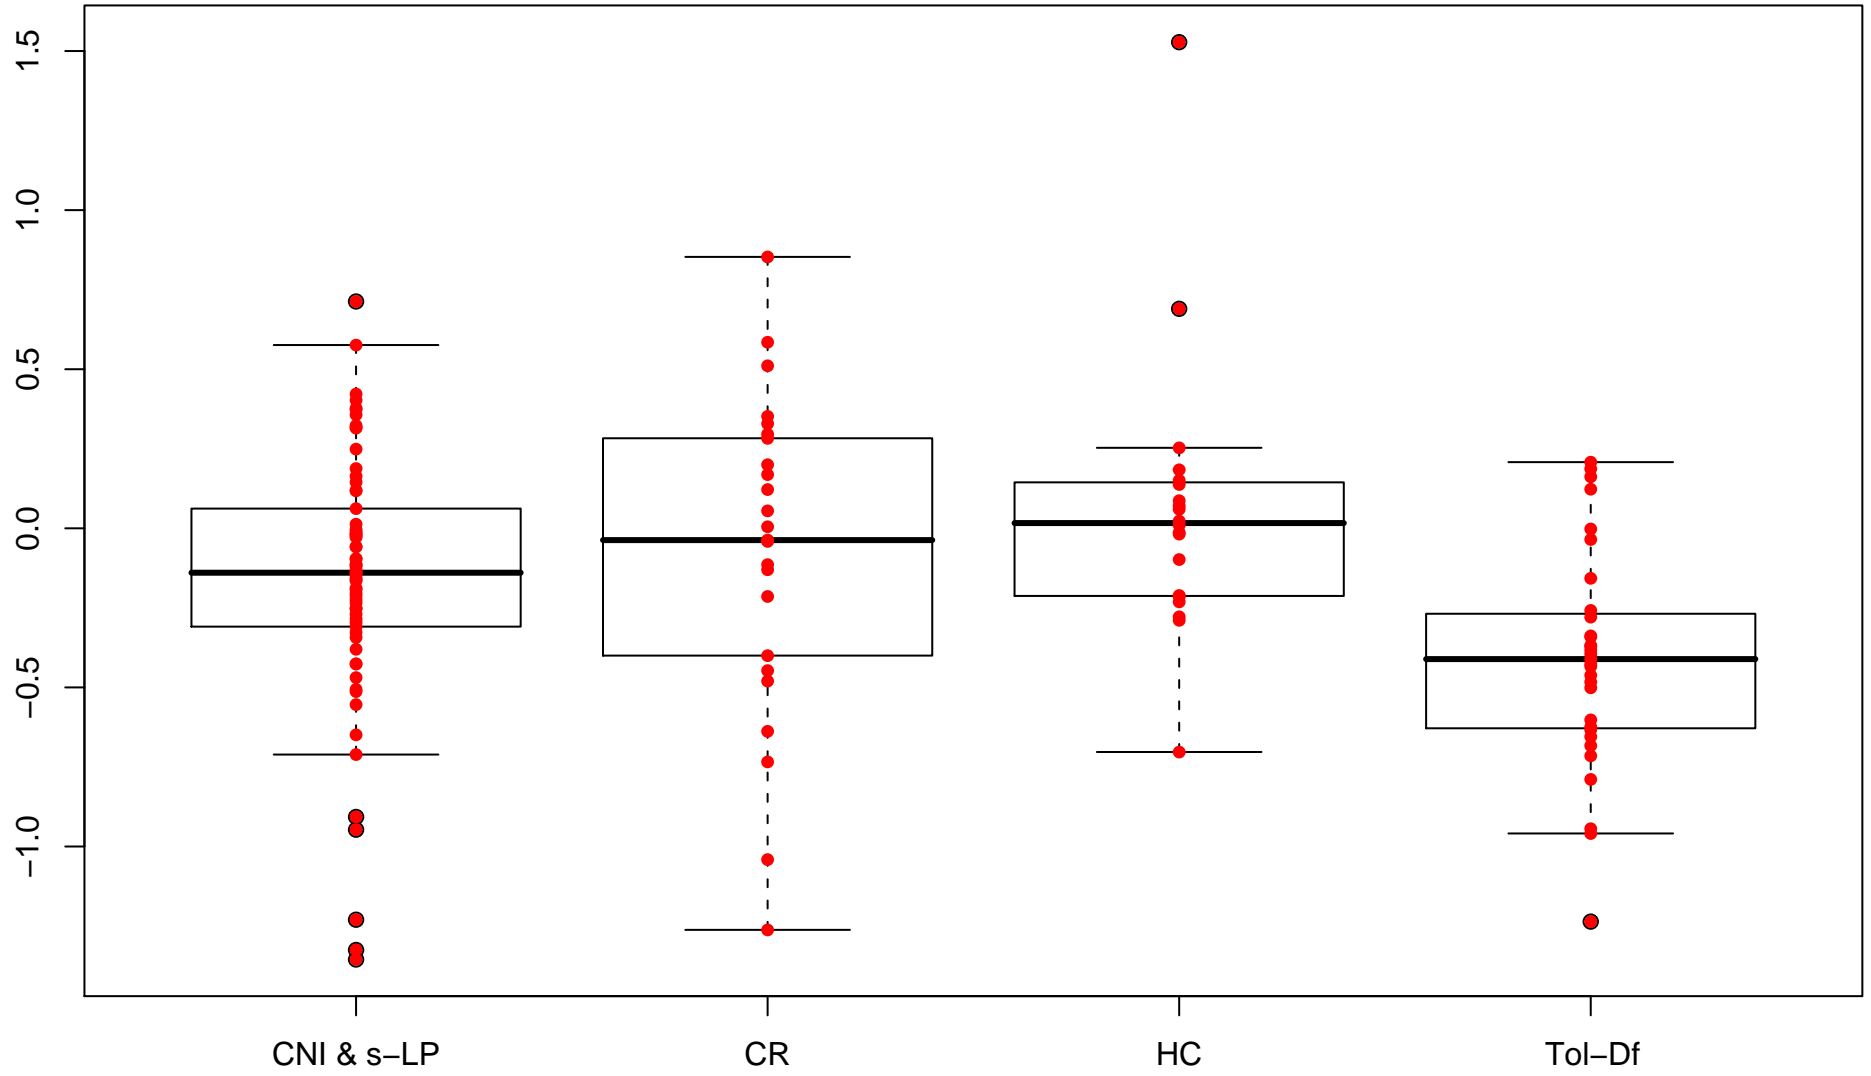

Rank 478 : RBMS1  
0.00021128

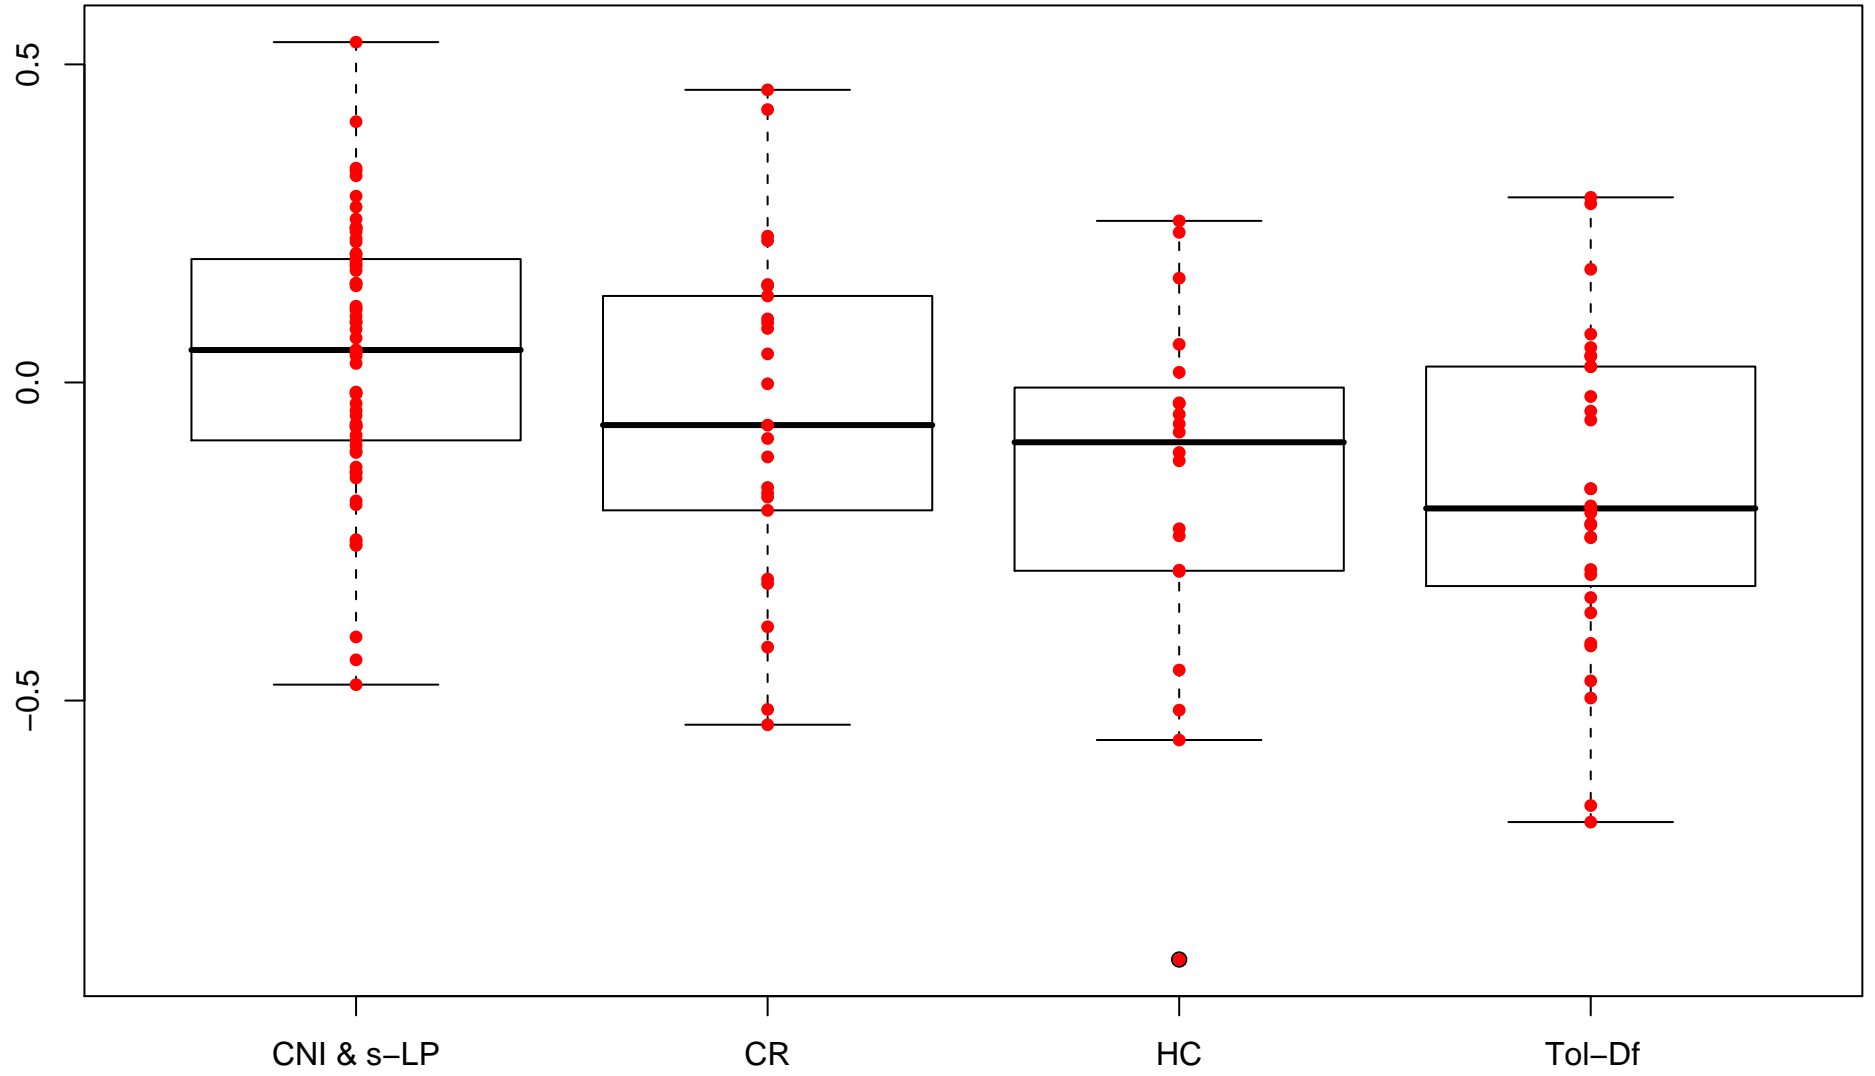

Rank 479 : TFB1M;TIAM2  
0.00021392

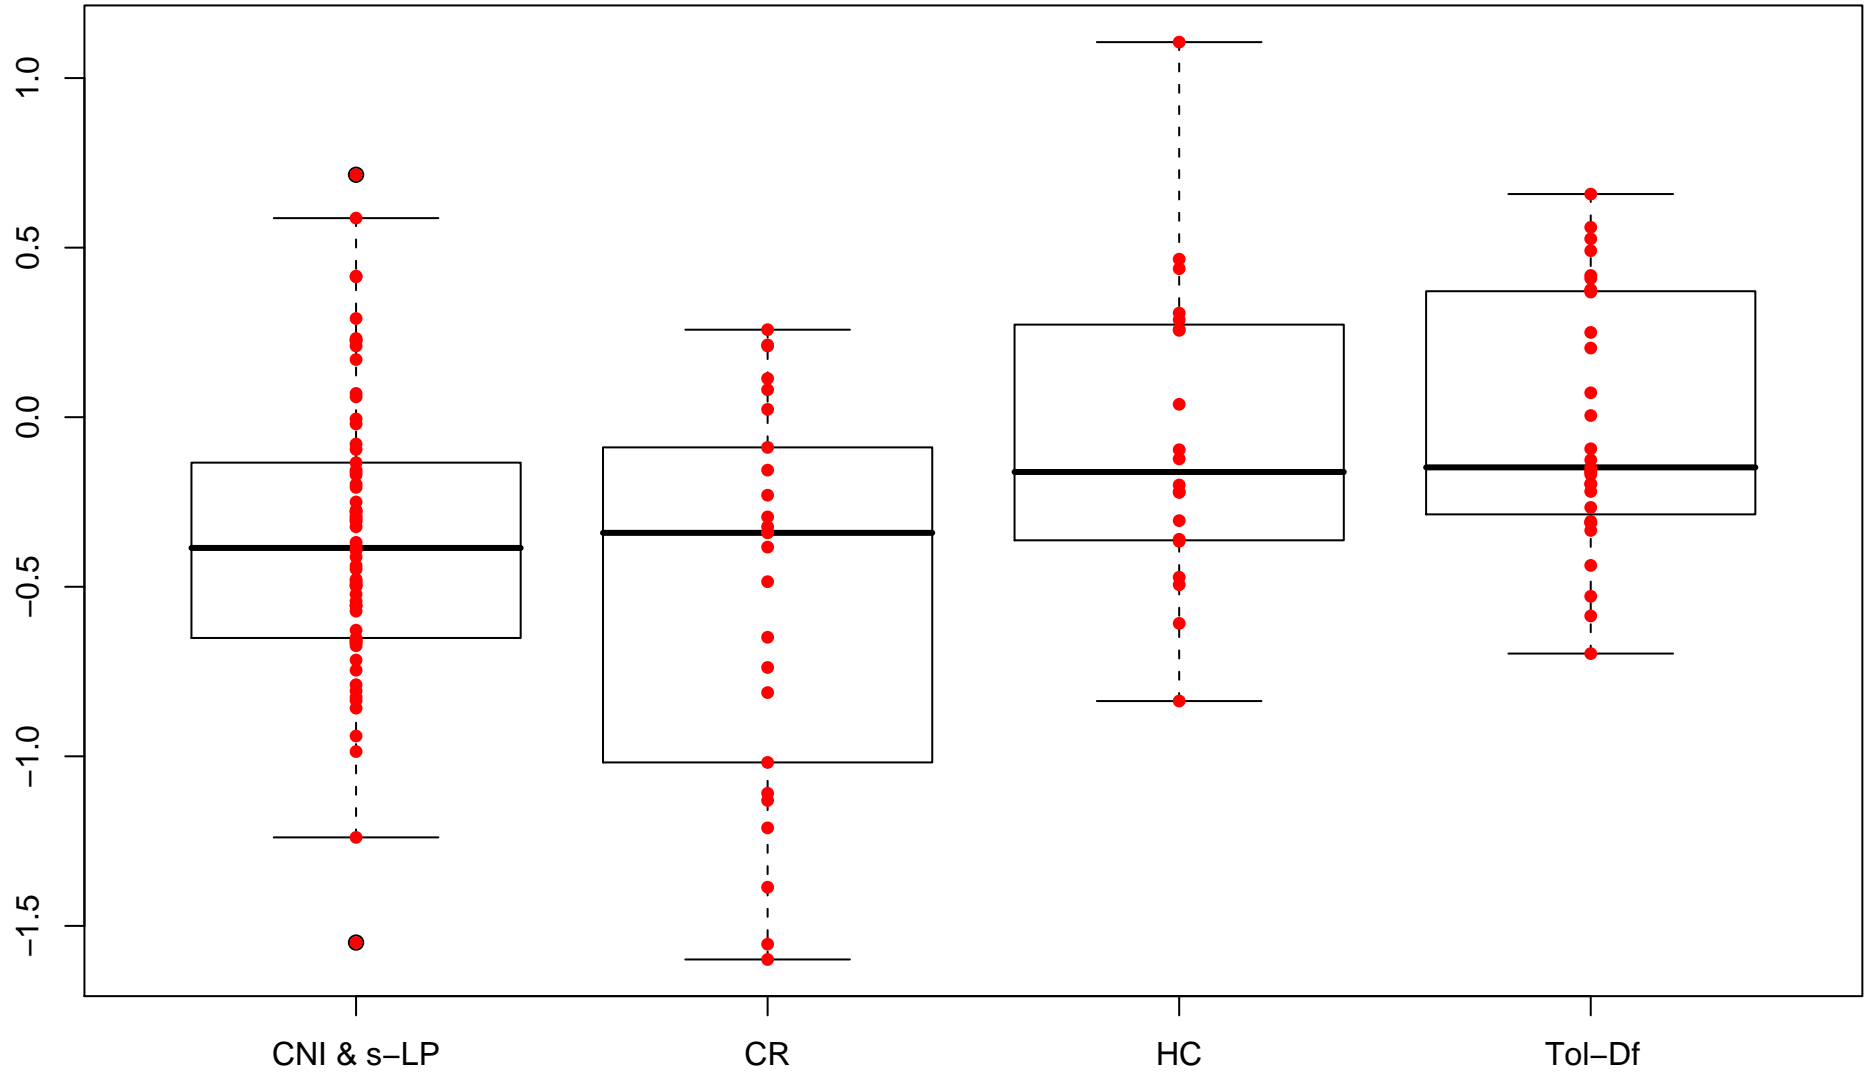



Rank 480 : LOC388210  
0.00021519

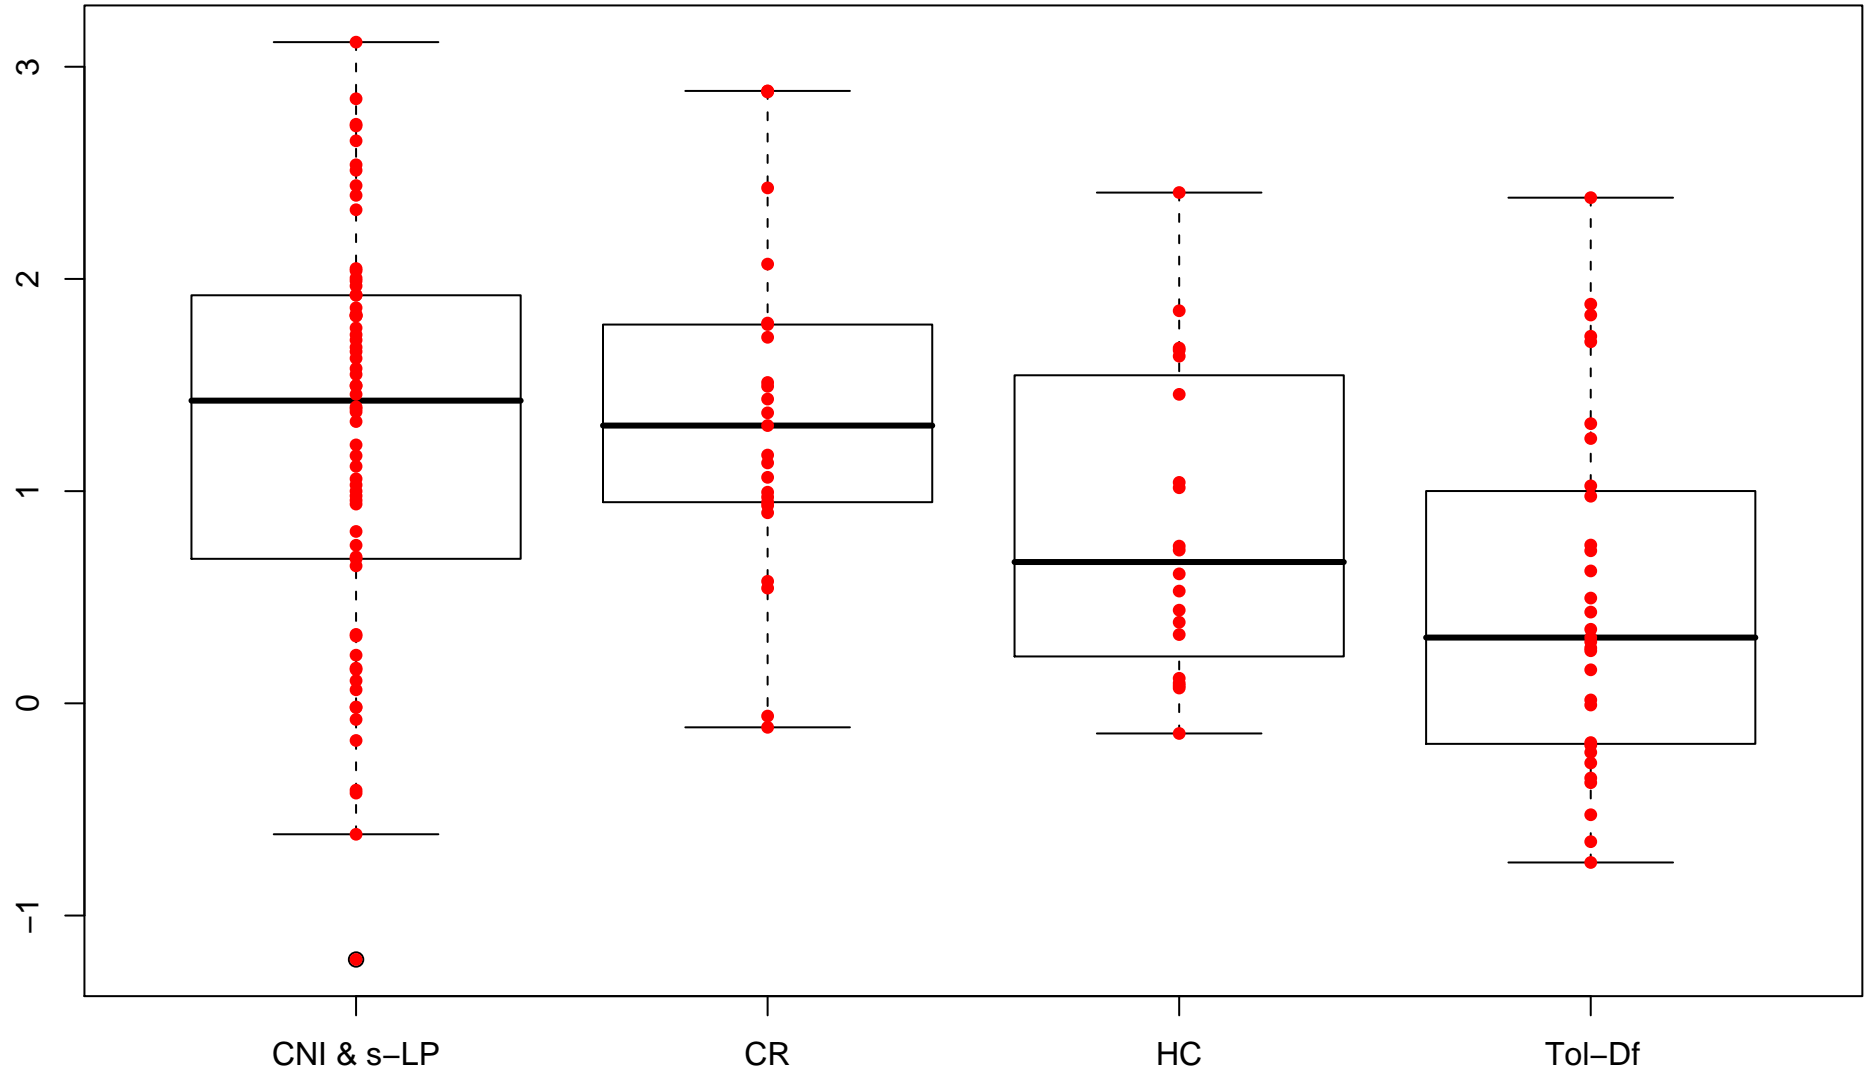

Rank 481 : MCM3  
0.000216

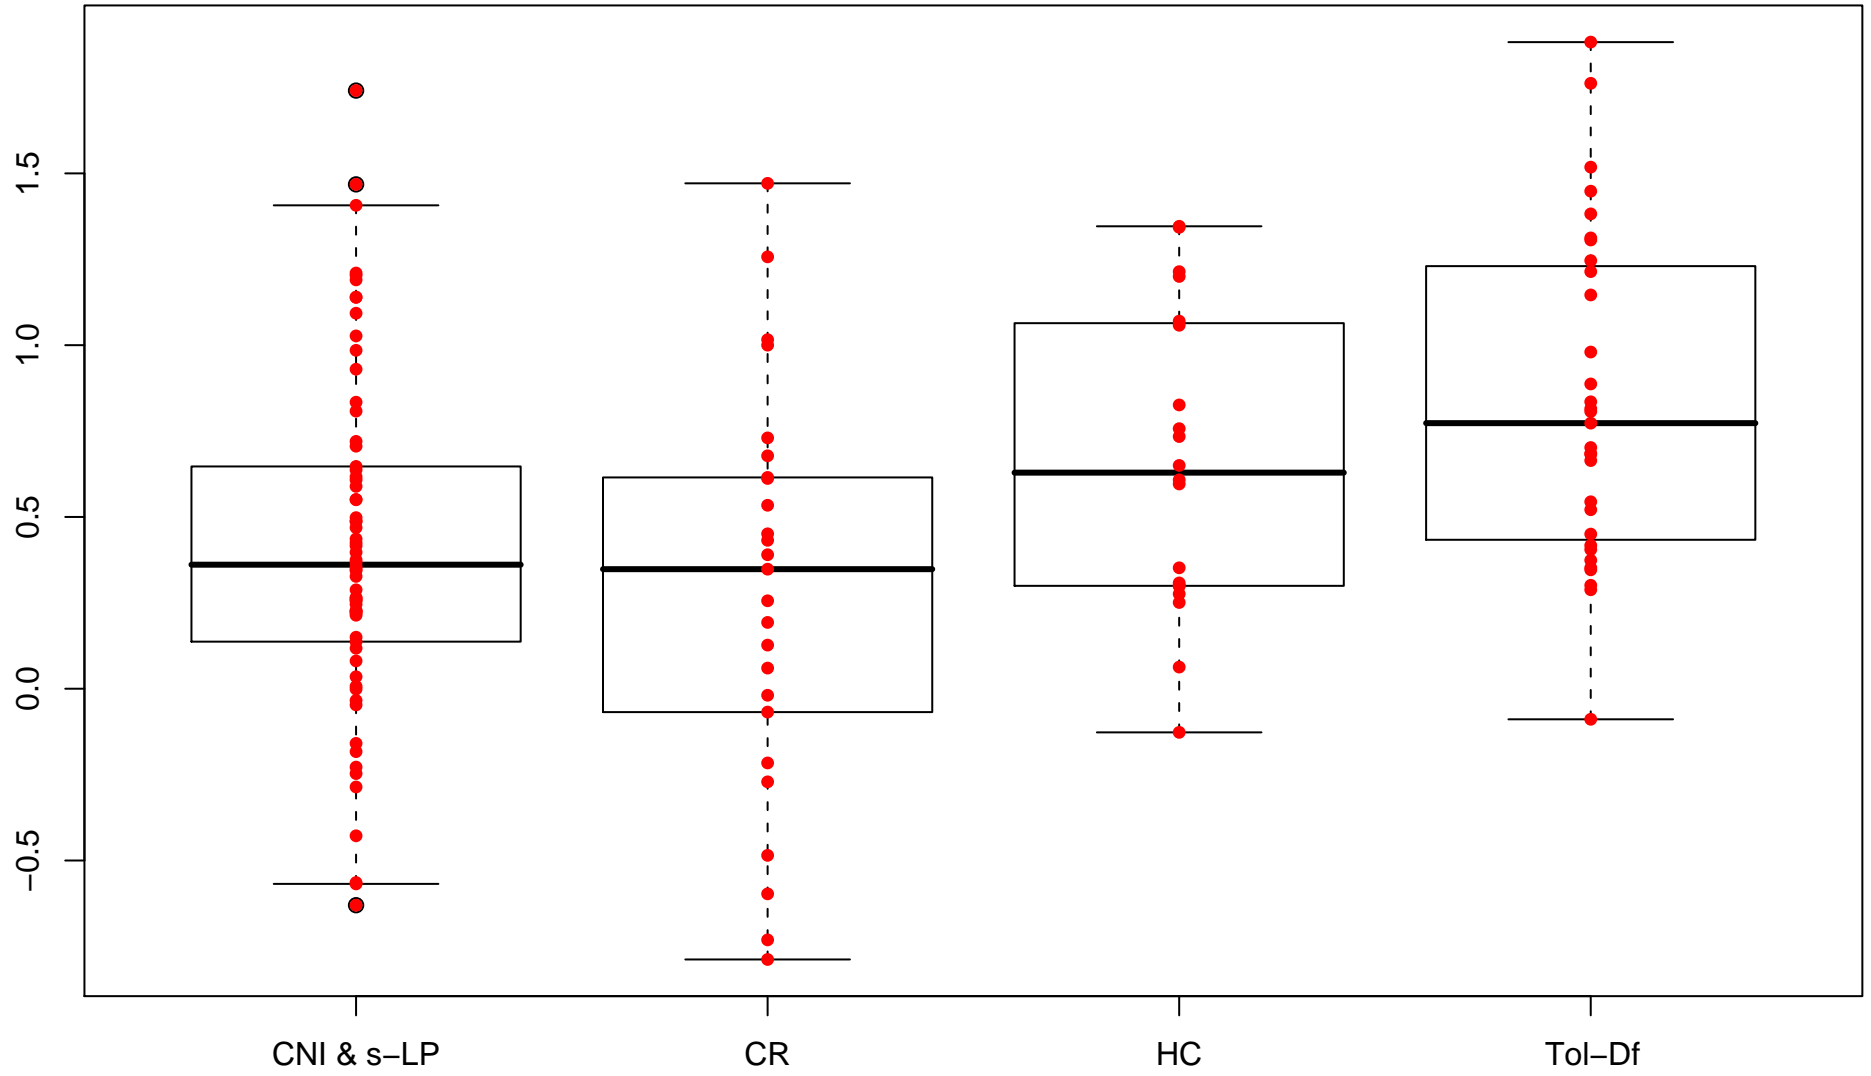

Rank 482 : IGHA1  
0.00022007

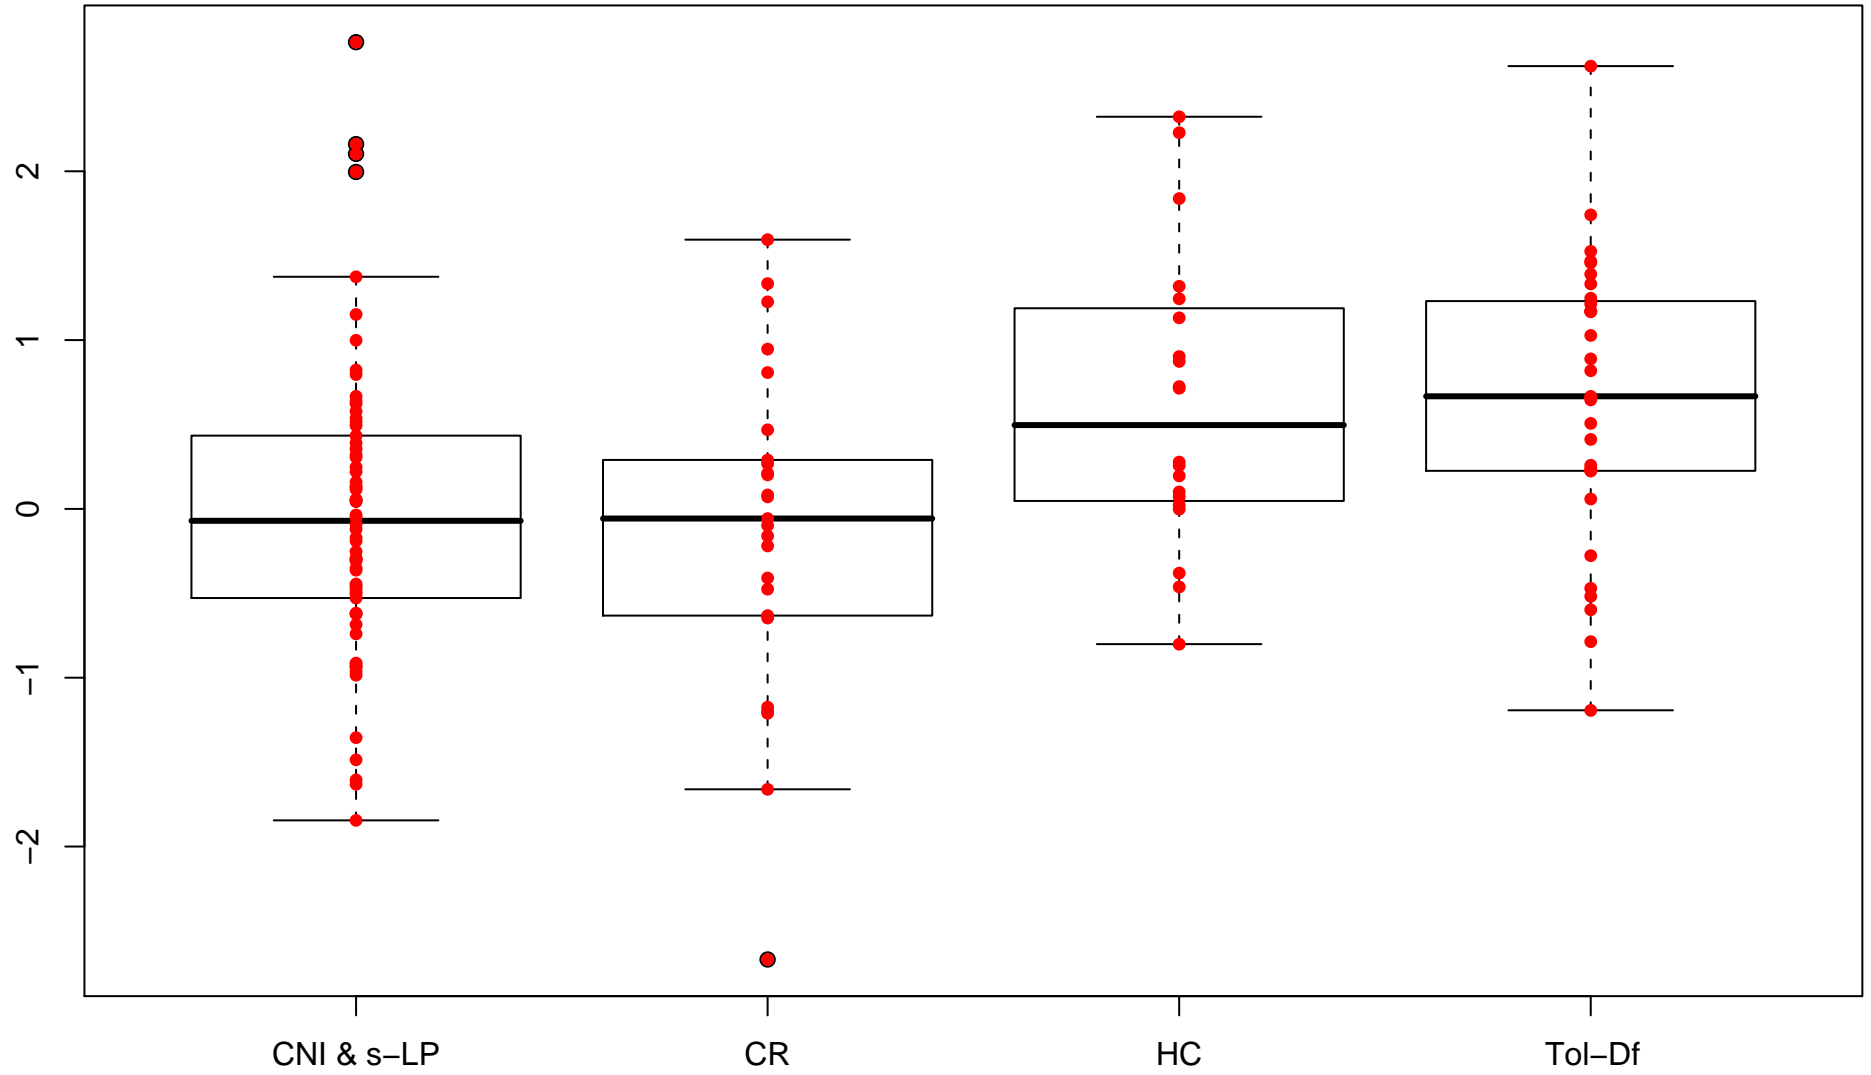

Rank 483 : IGLV3-19  
0.0002203

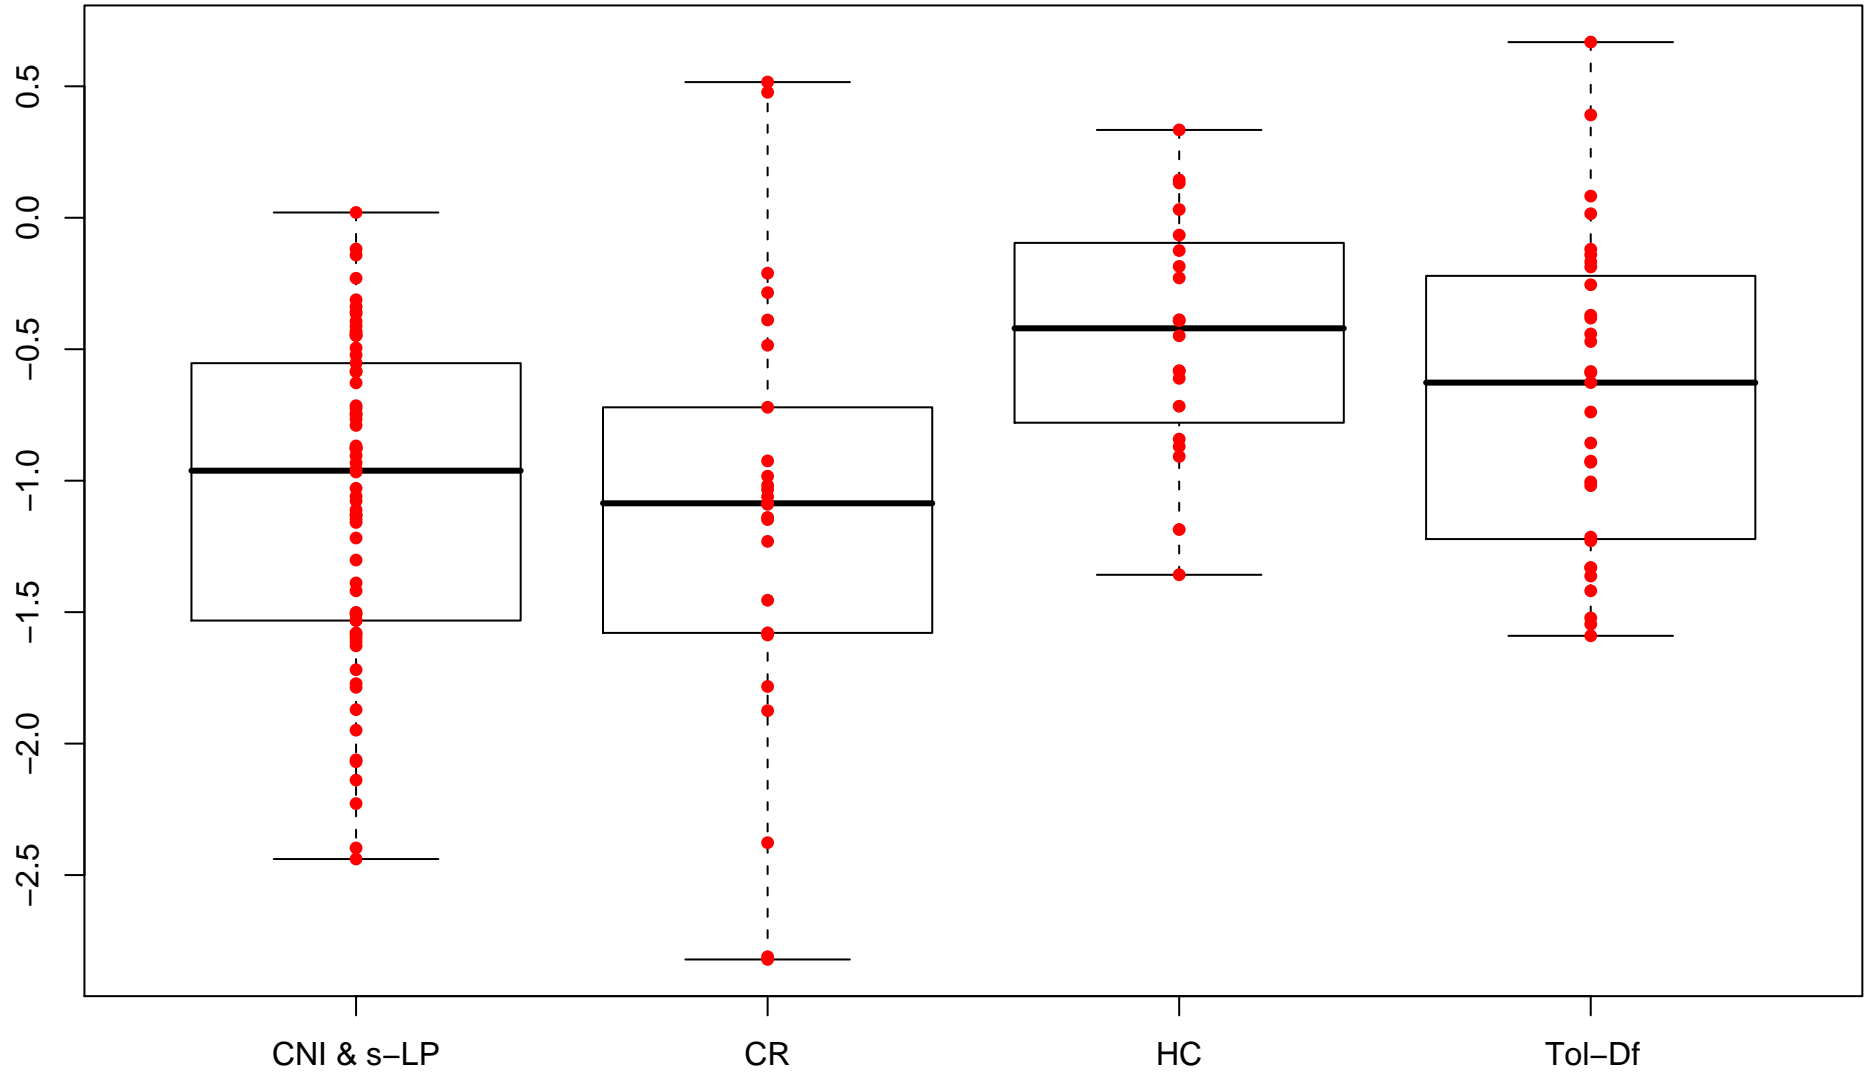

Rank 484 : C1ORF142  
0.0002227

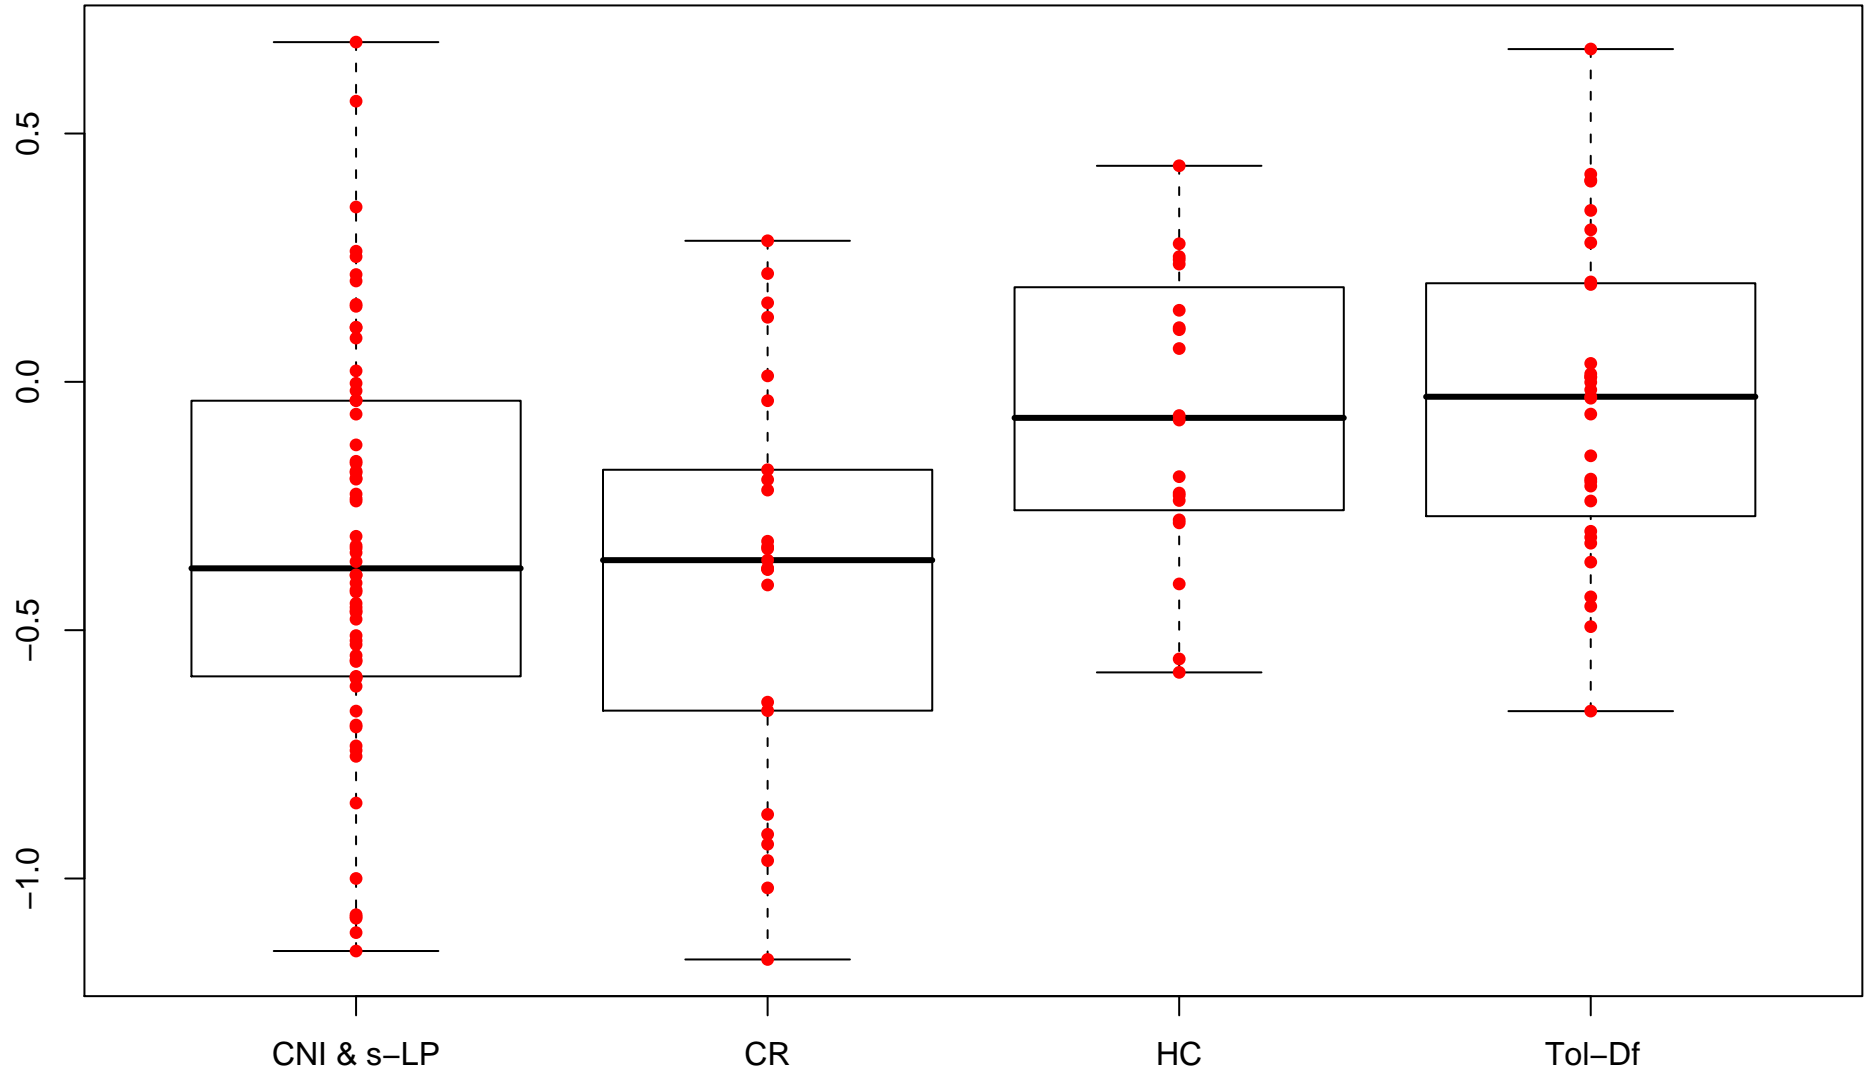

Rank 485 : FANCE  
0.00022335

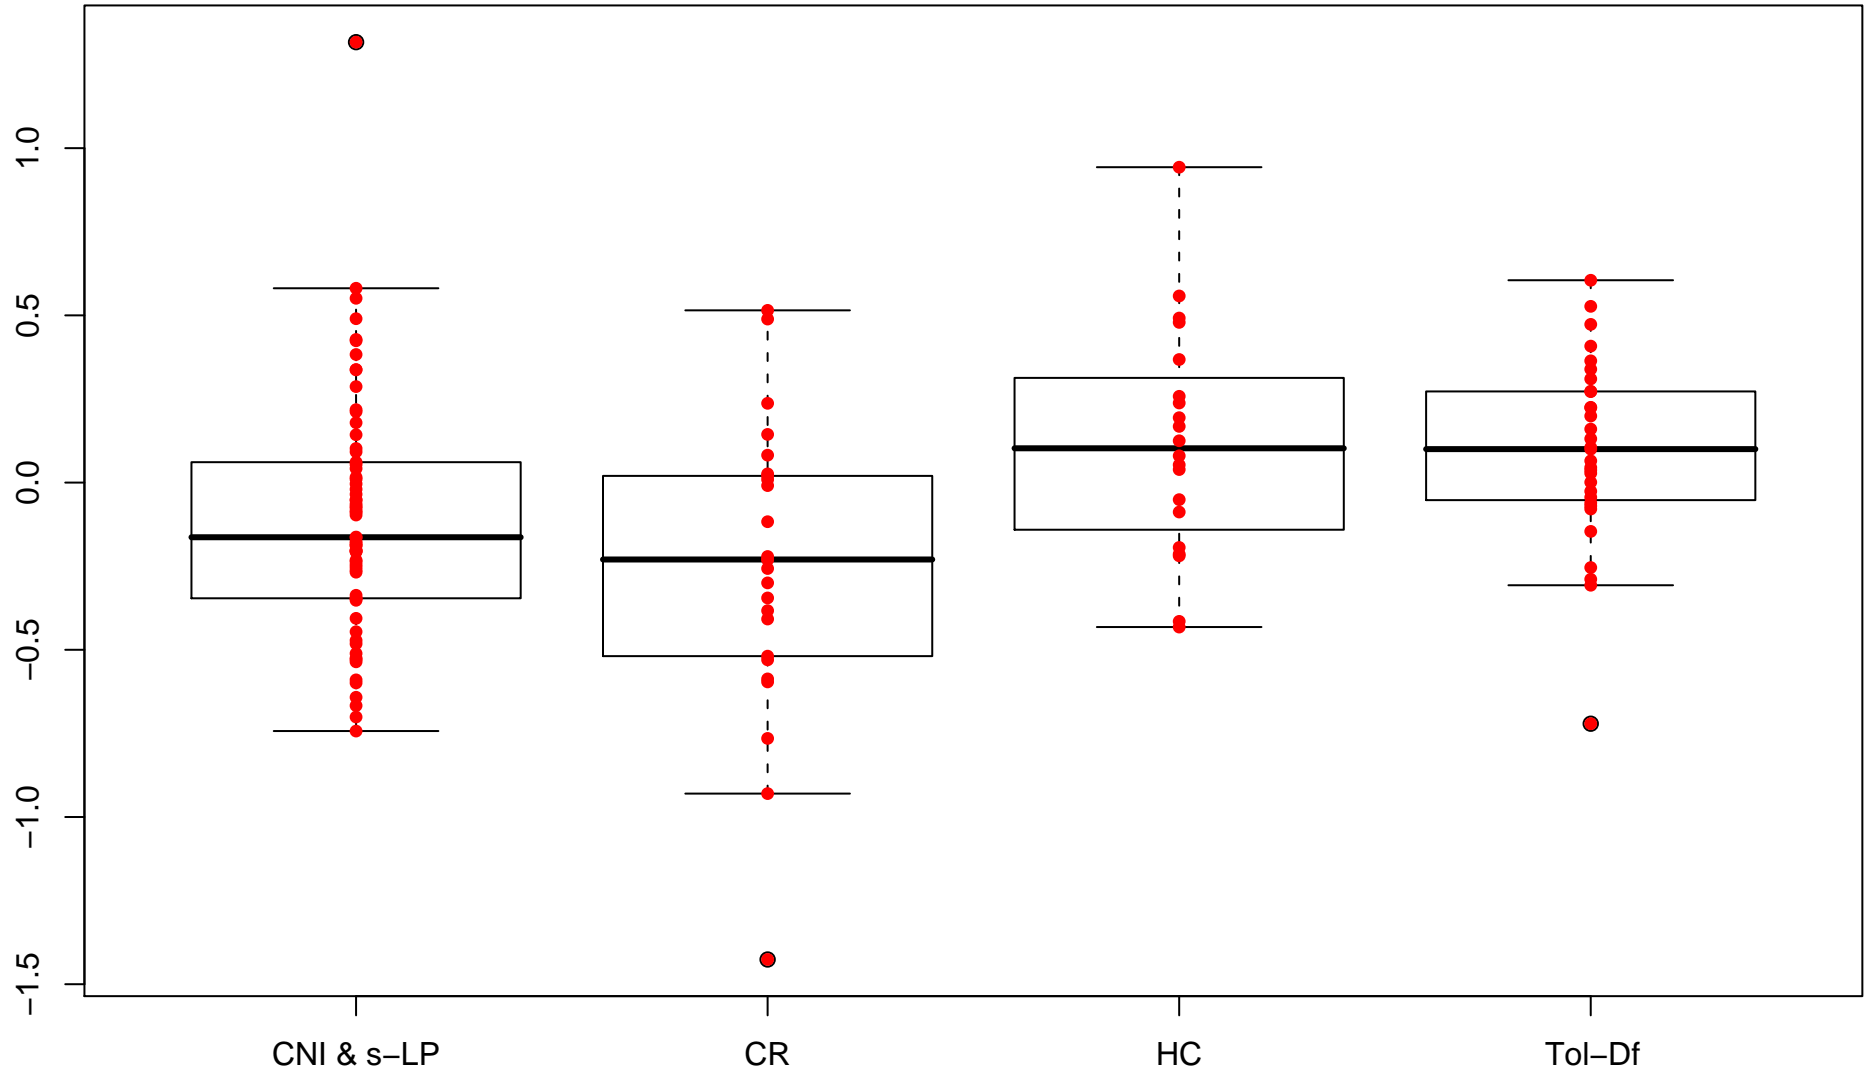

Rank 486 : AK5  
0.00022441

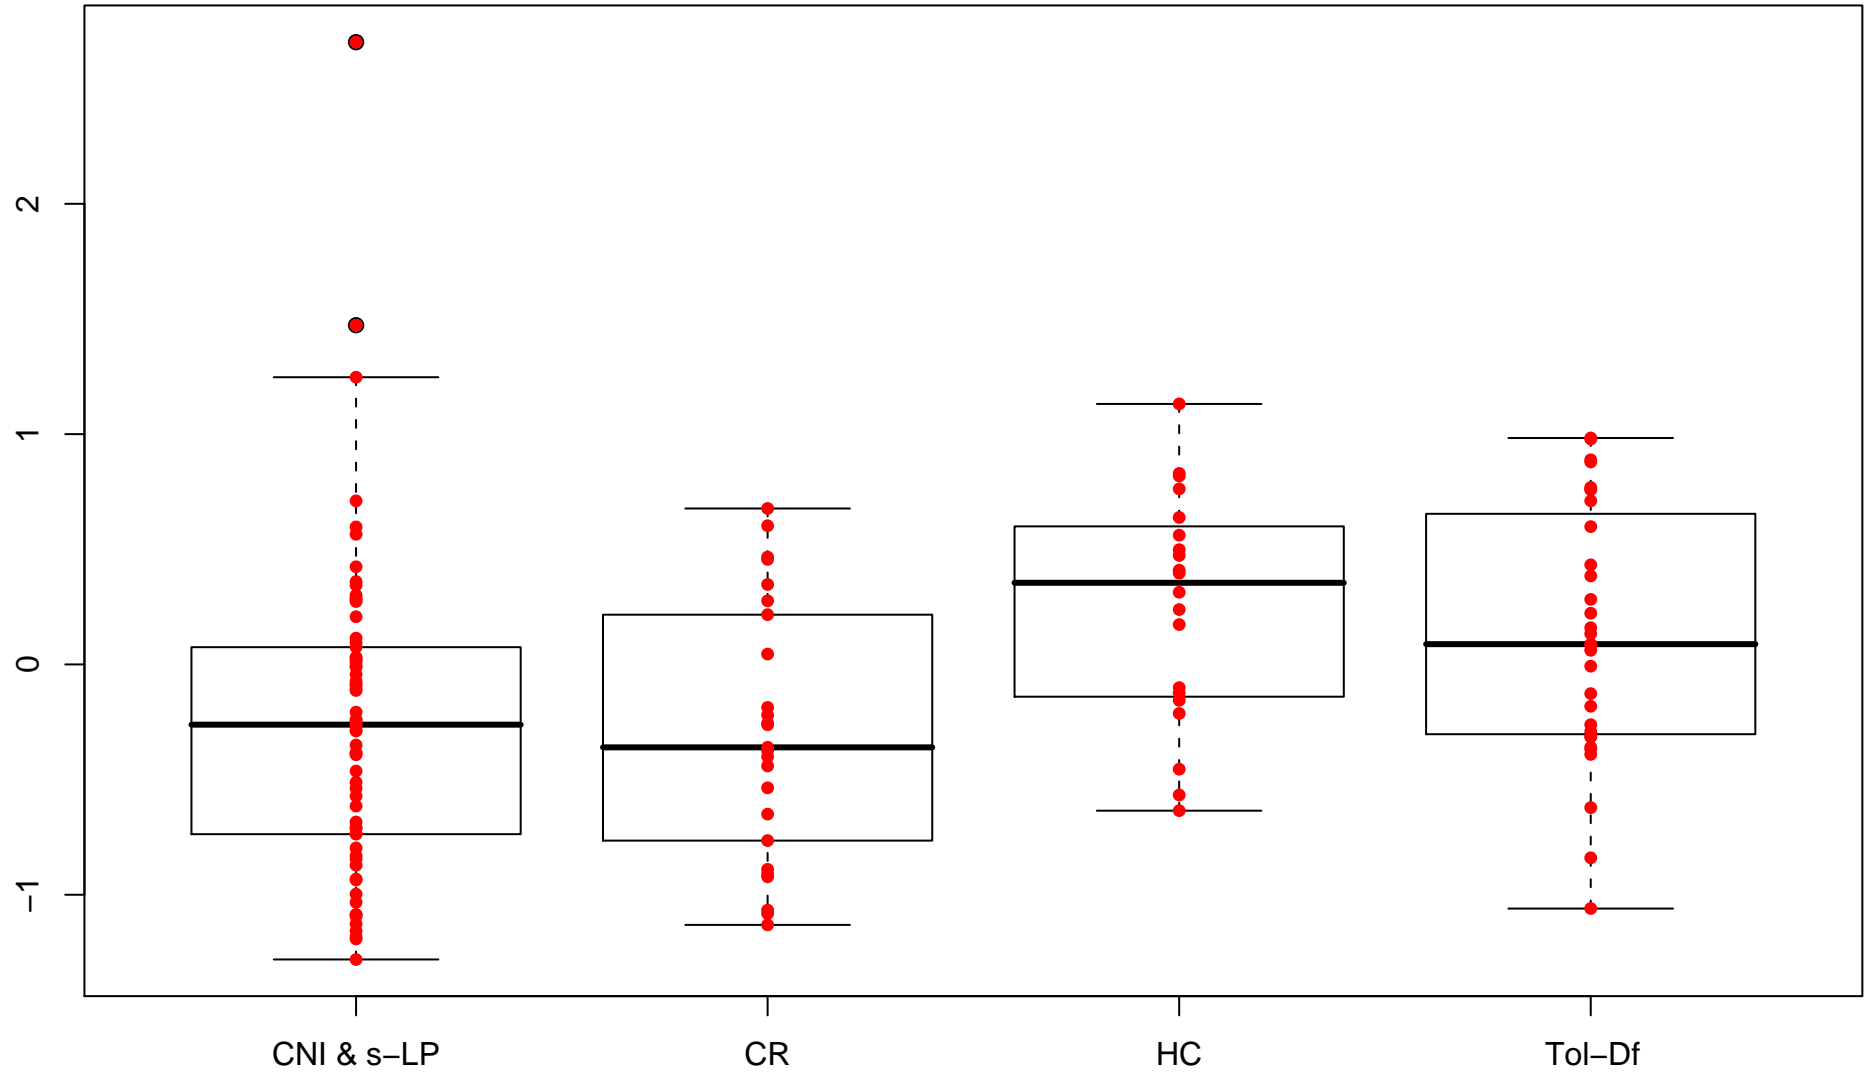

Rank 487 : NAP1L1  
0.00022481

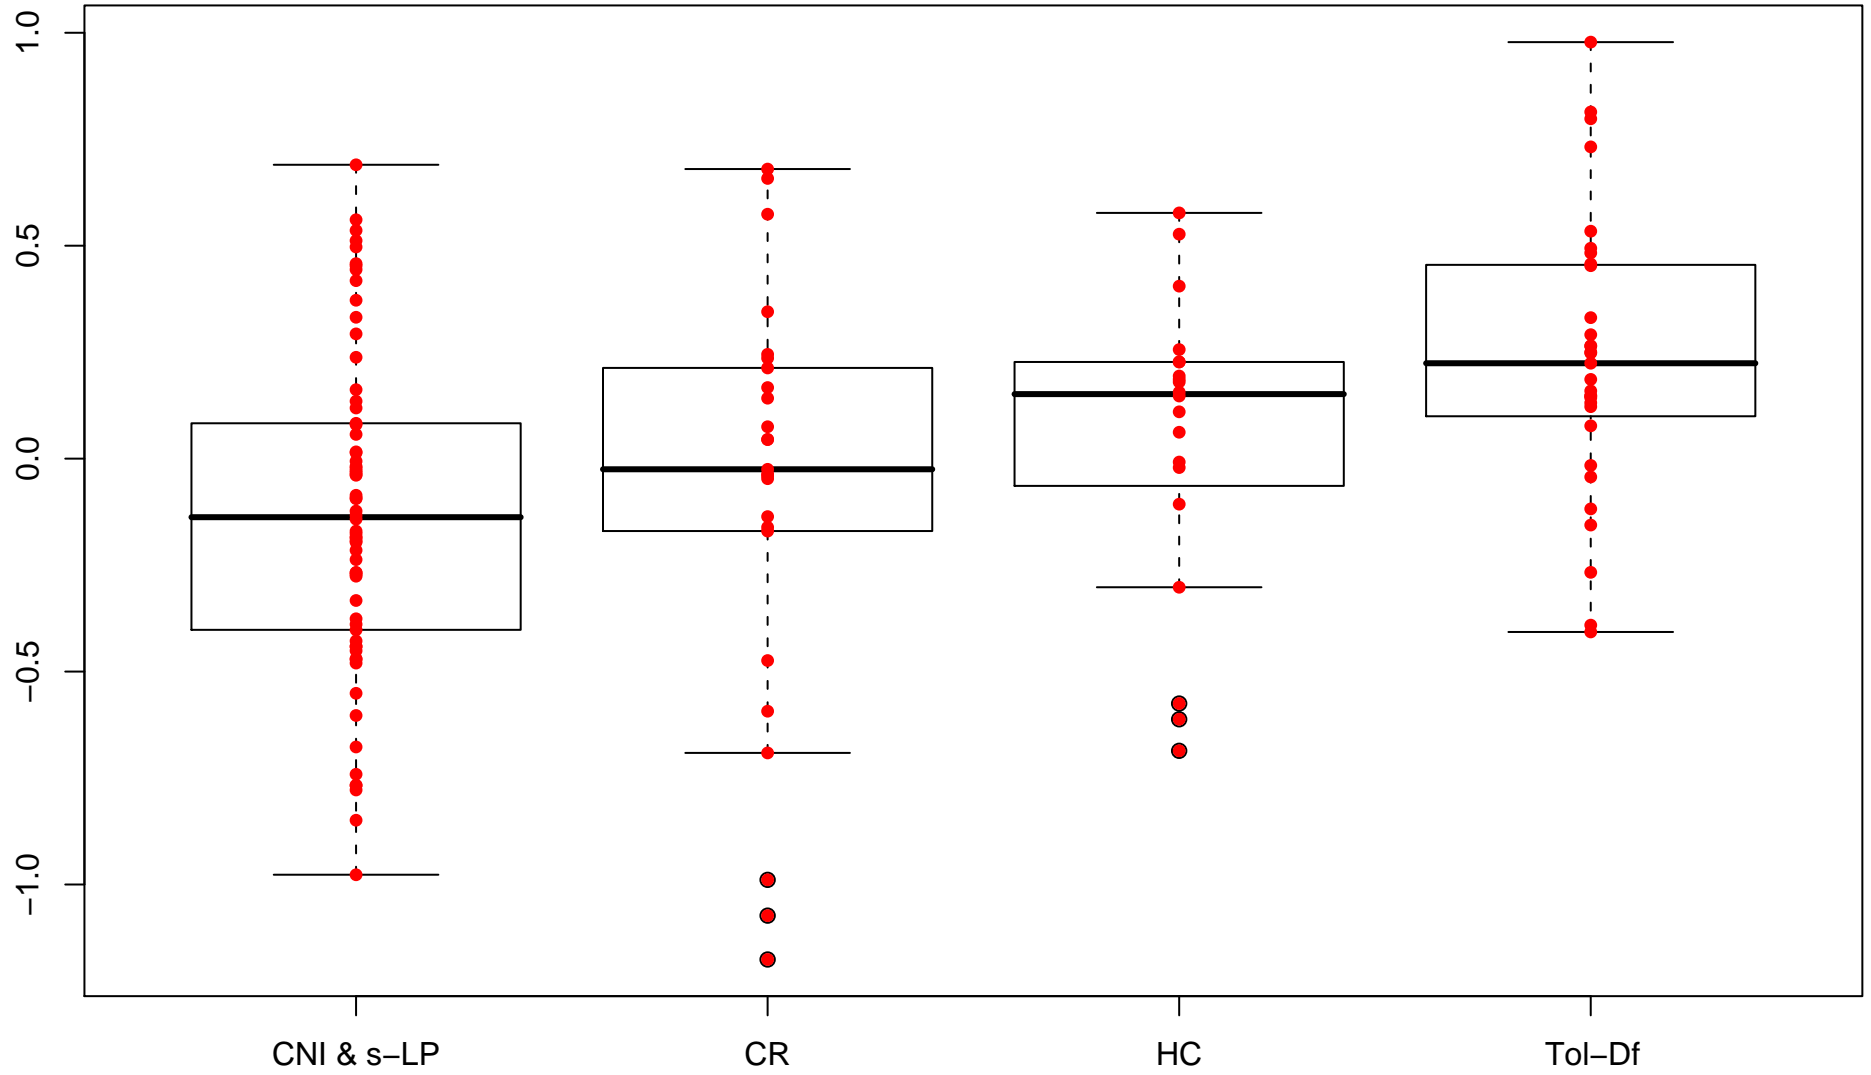



Rank 488 : DDX58  
0.00022672

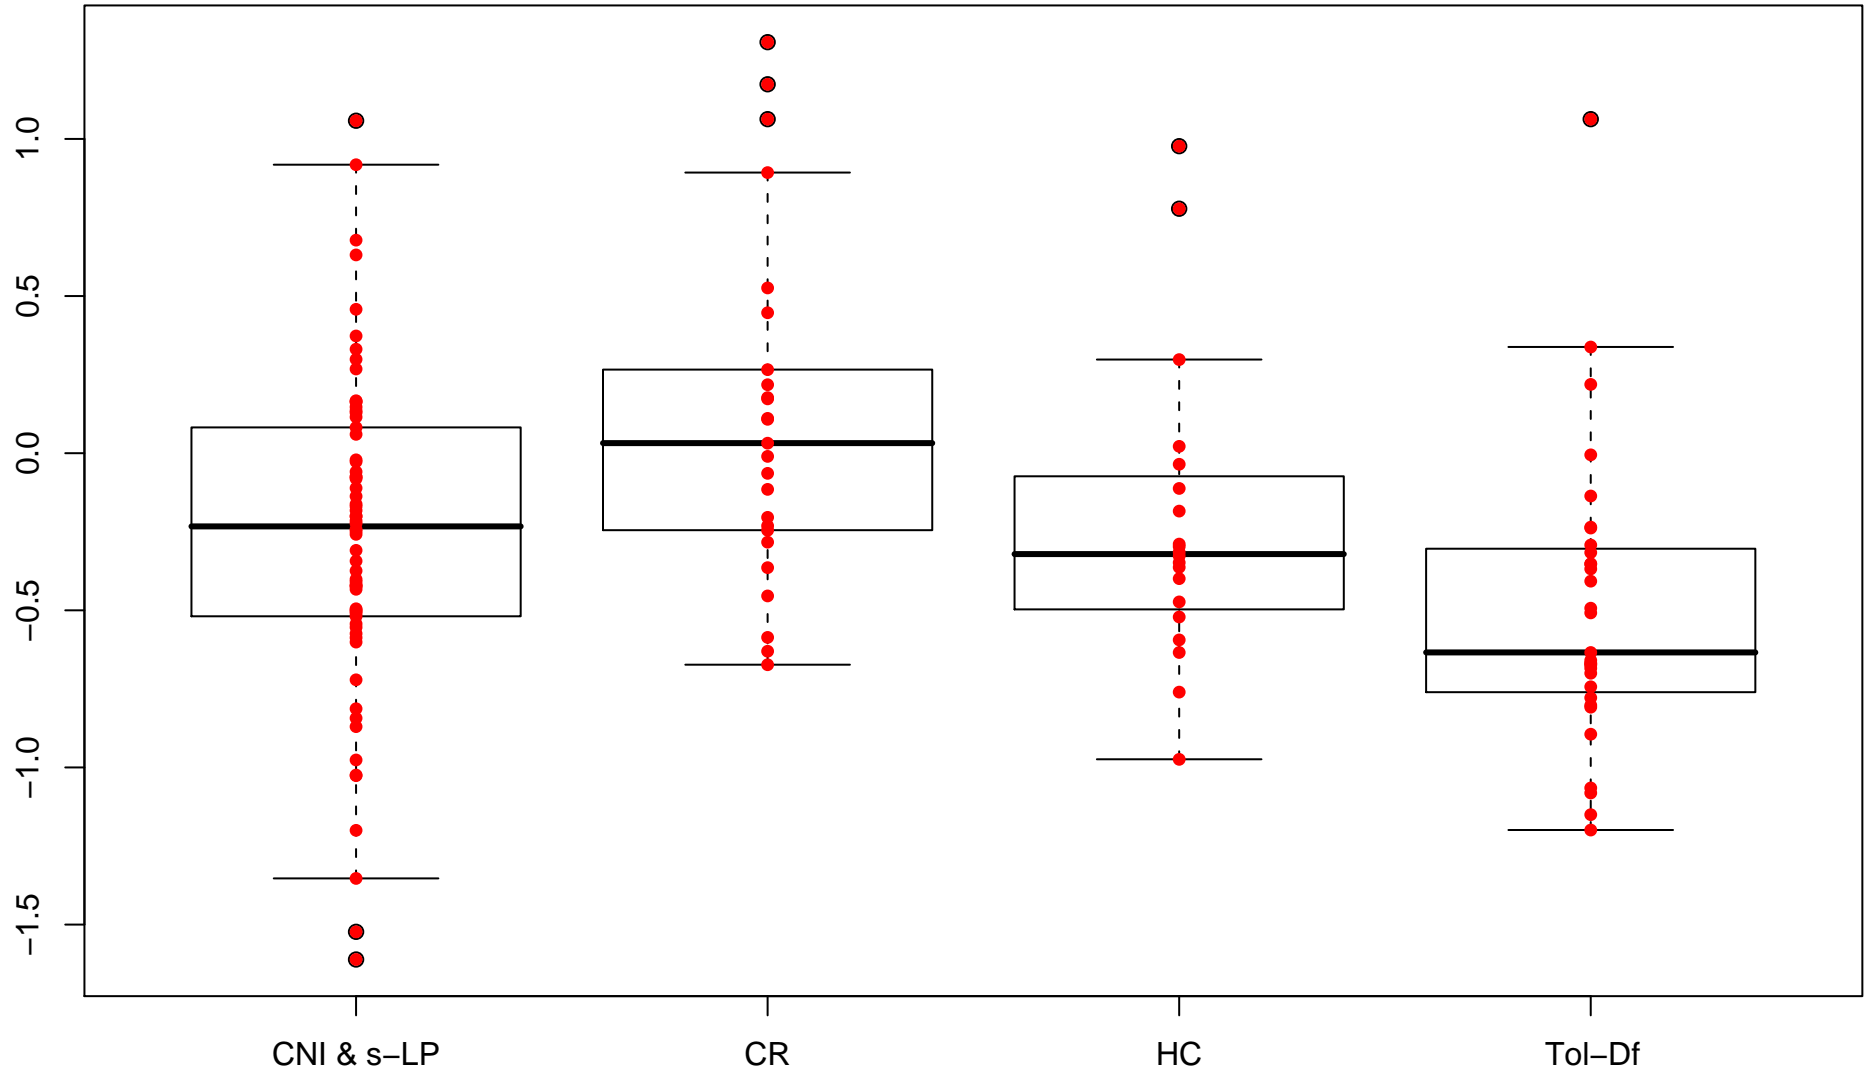

Rank 489 : IRAK2  
0.00022704

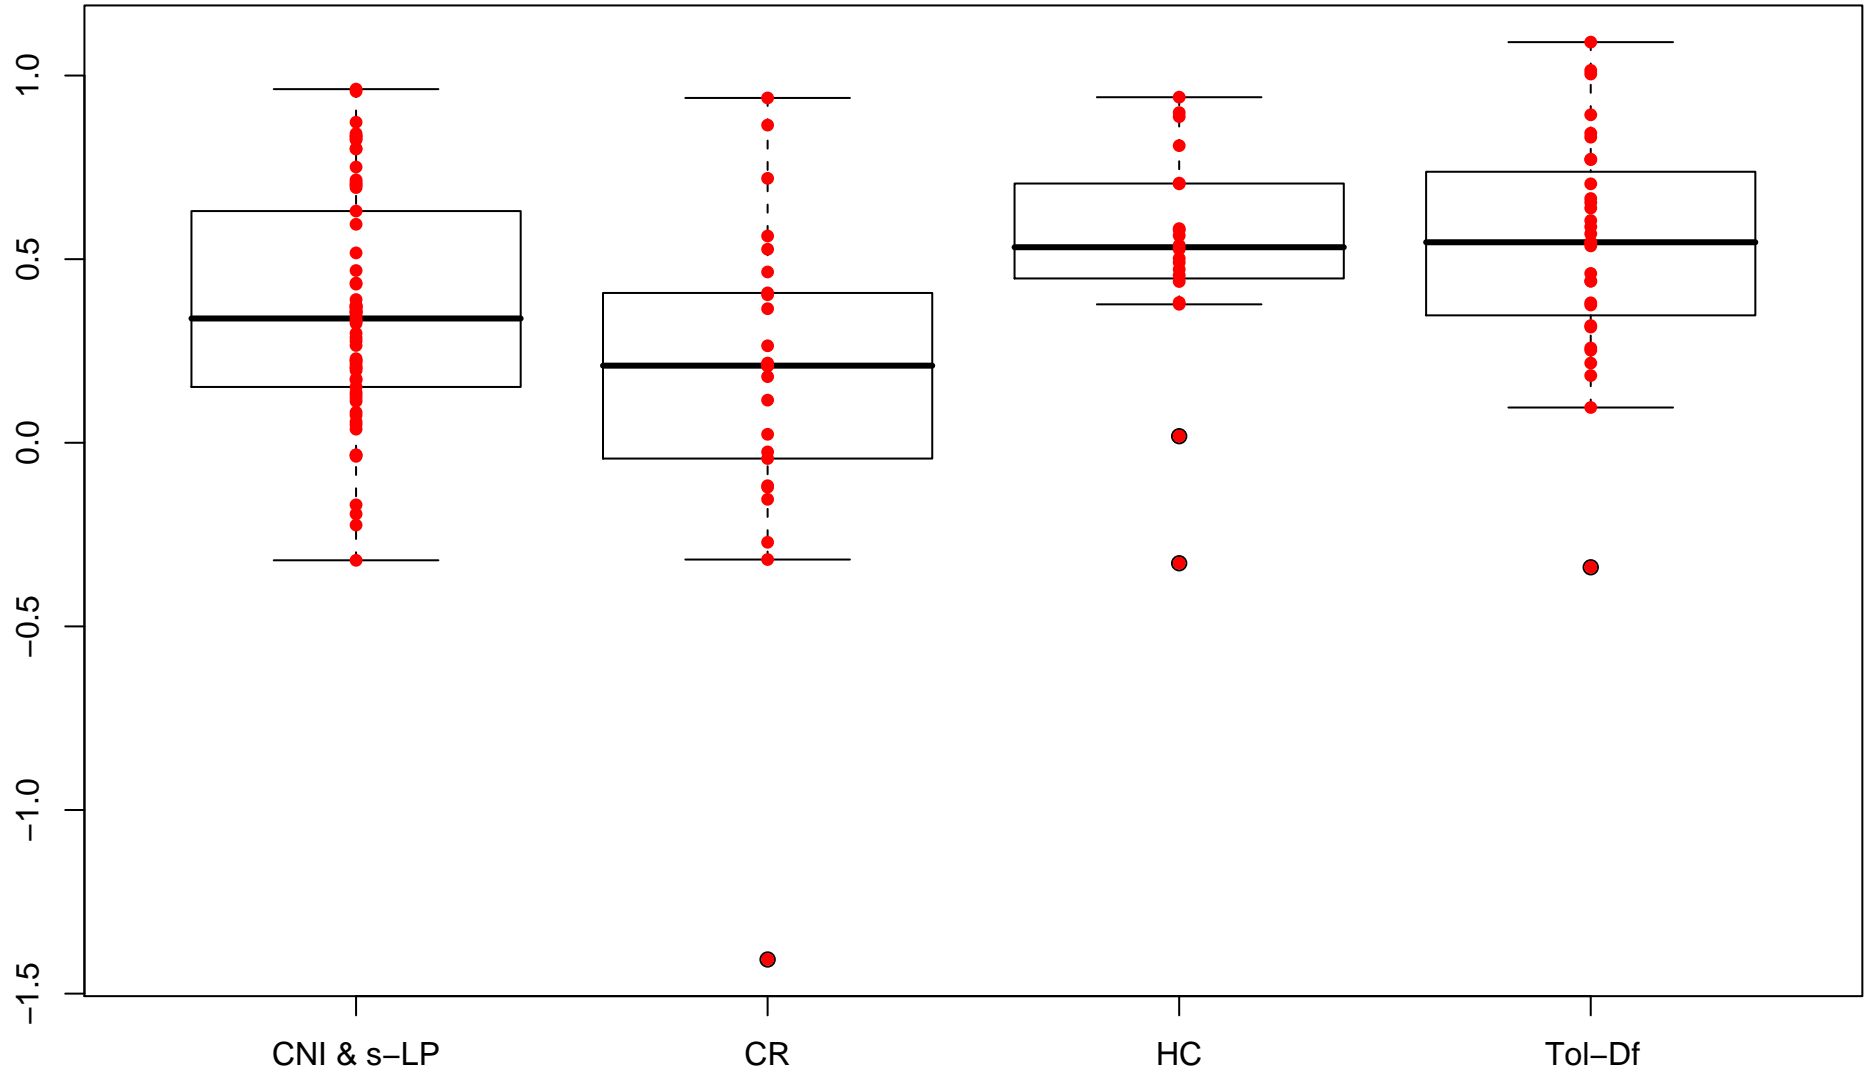

Rank 490 : GARNL1  
0.00022709

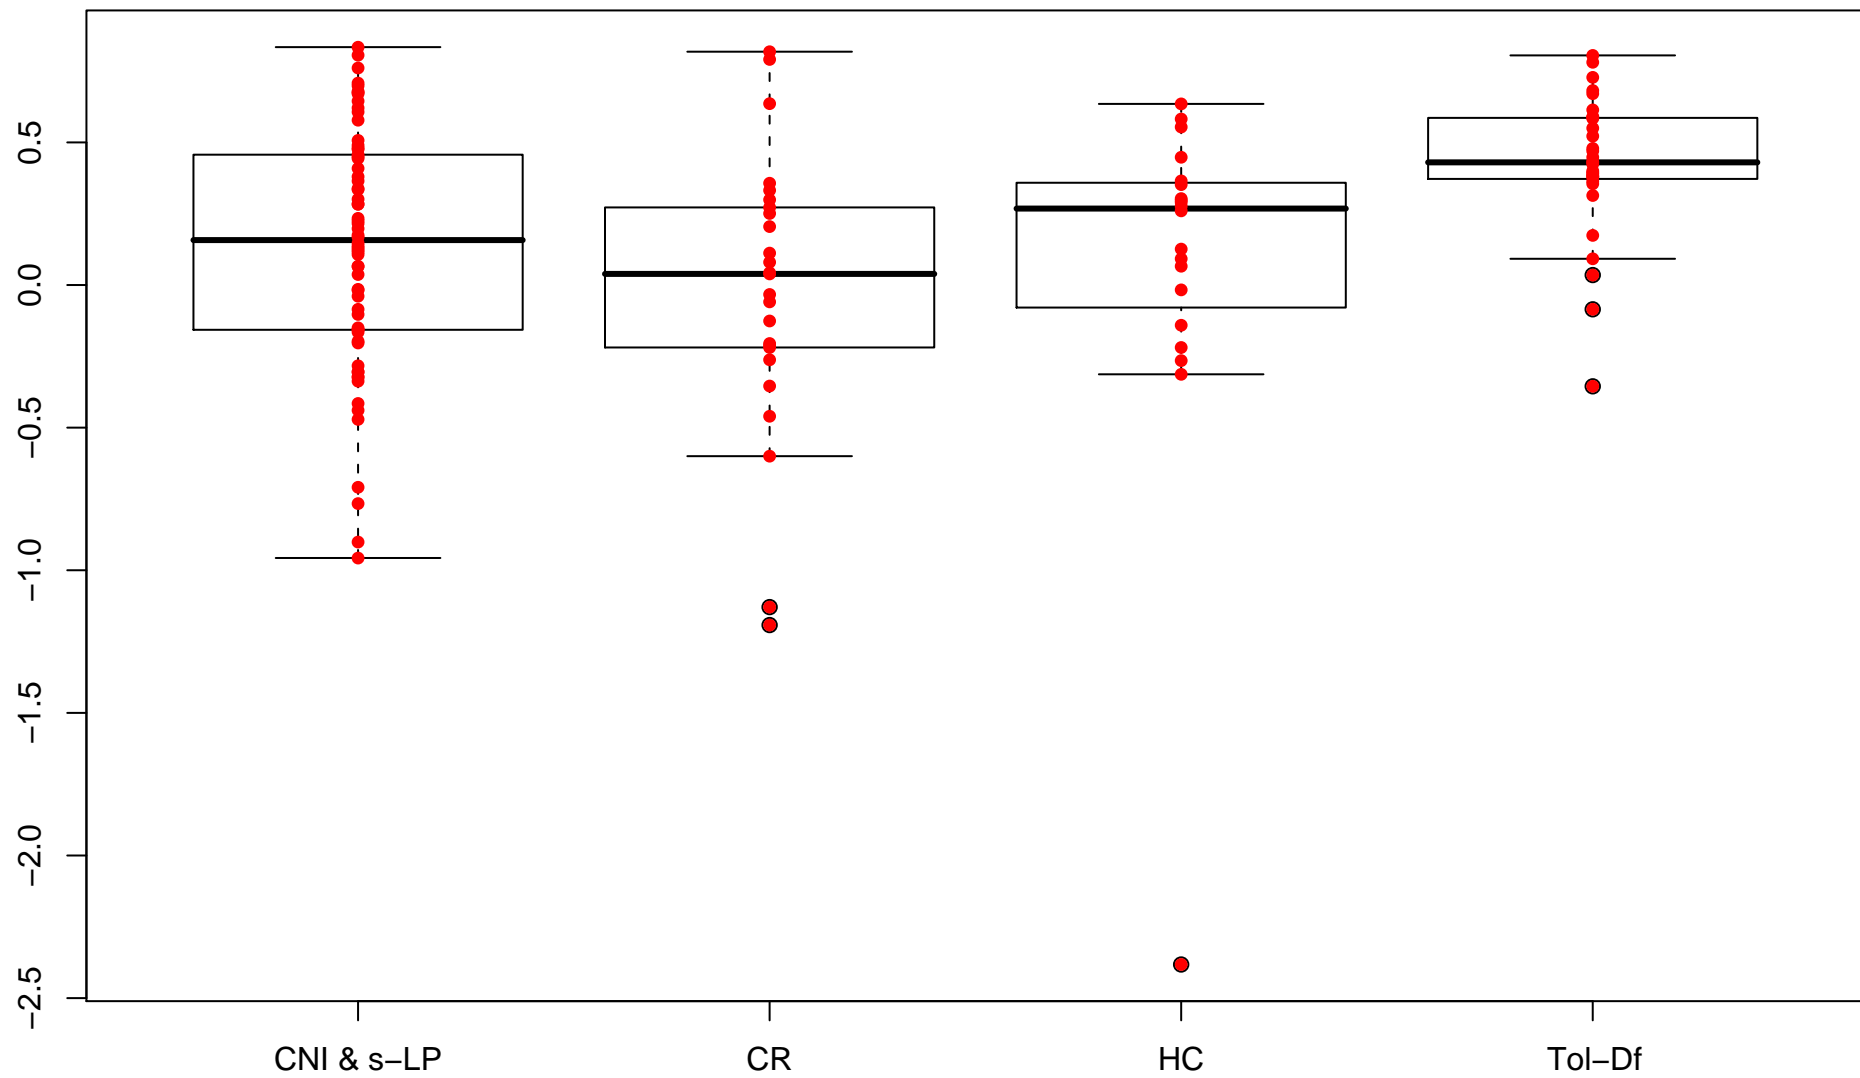

Rank 491 : NARS2  
0.00022754

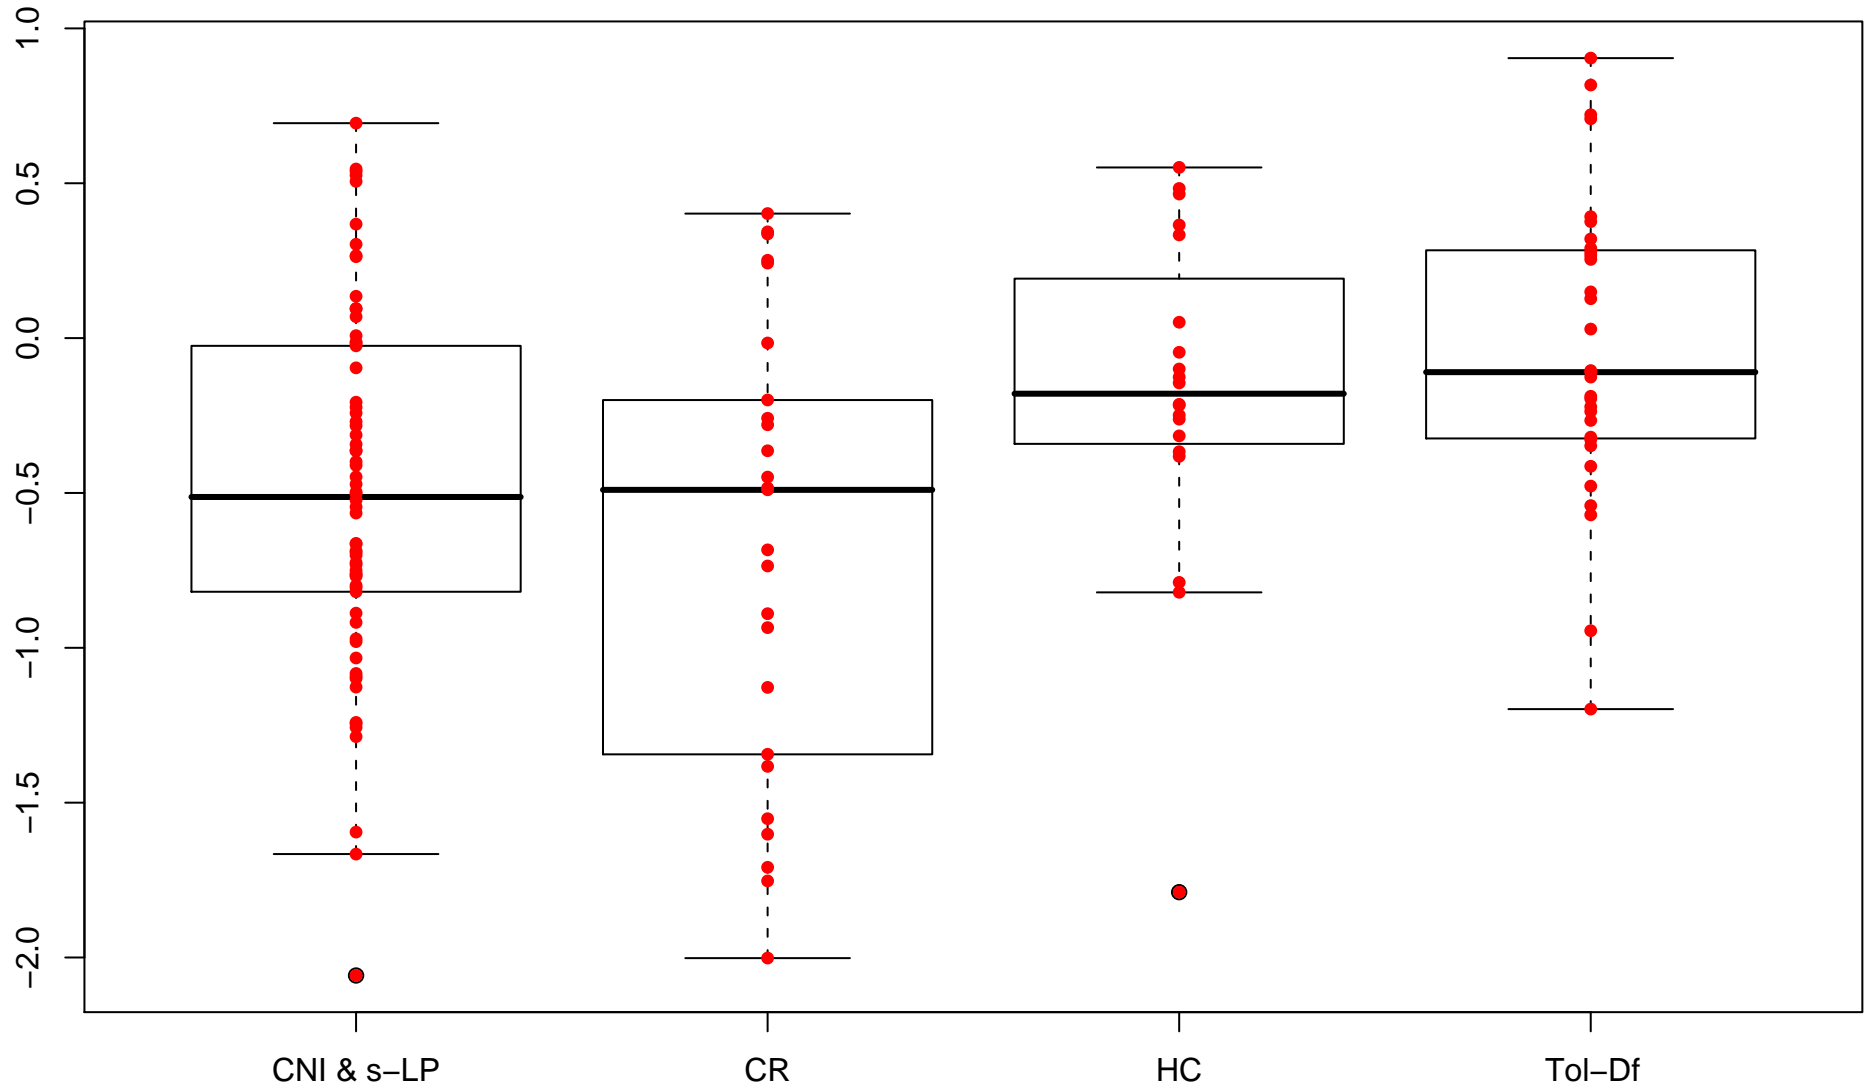

Rank 492 : CSF2RB  
0.00022883

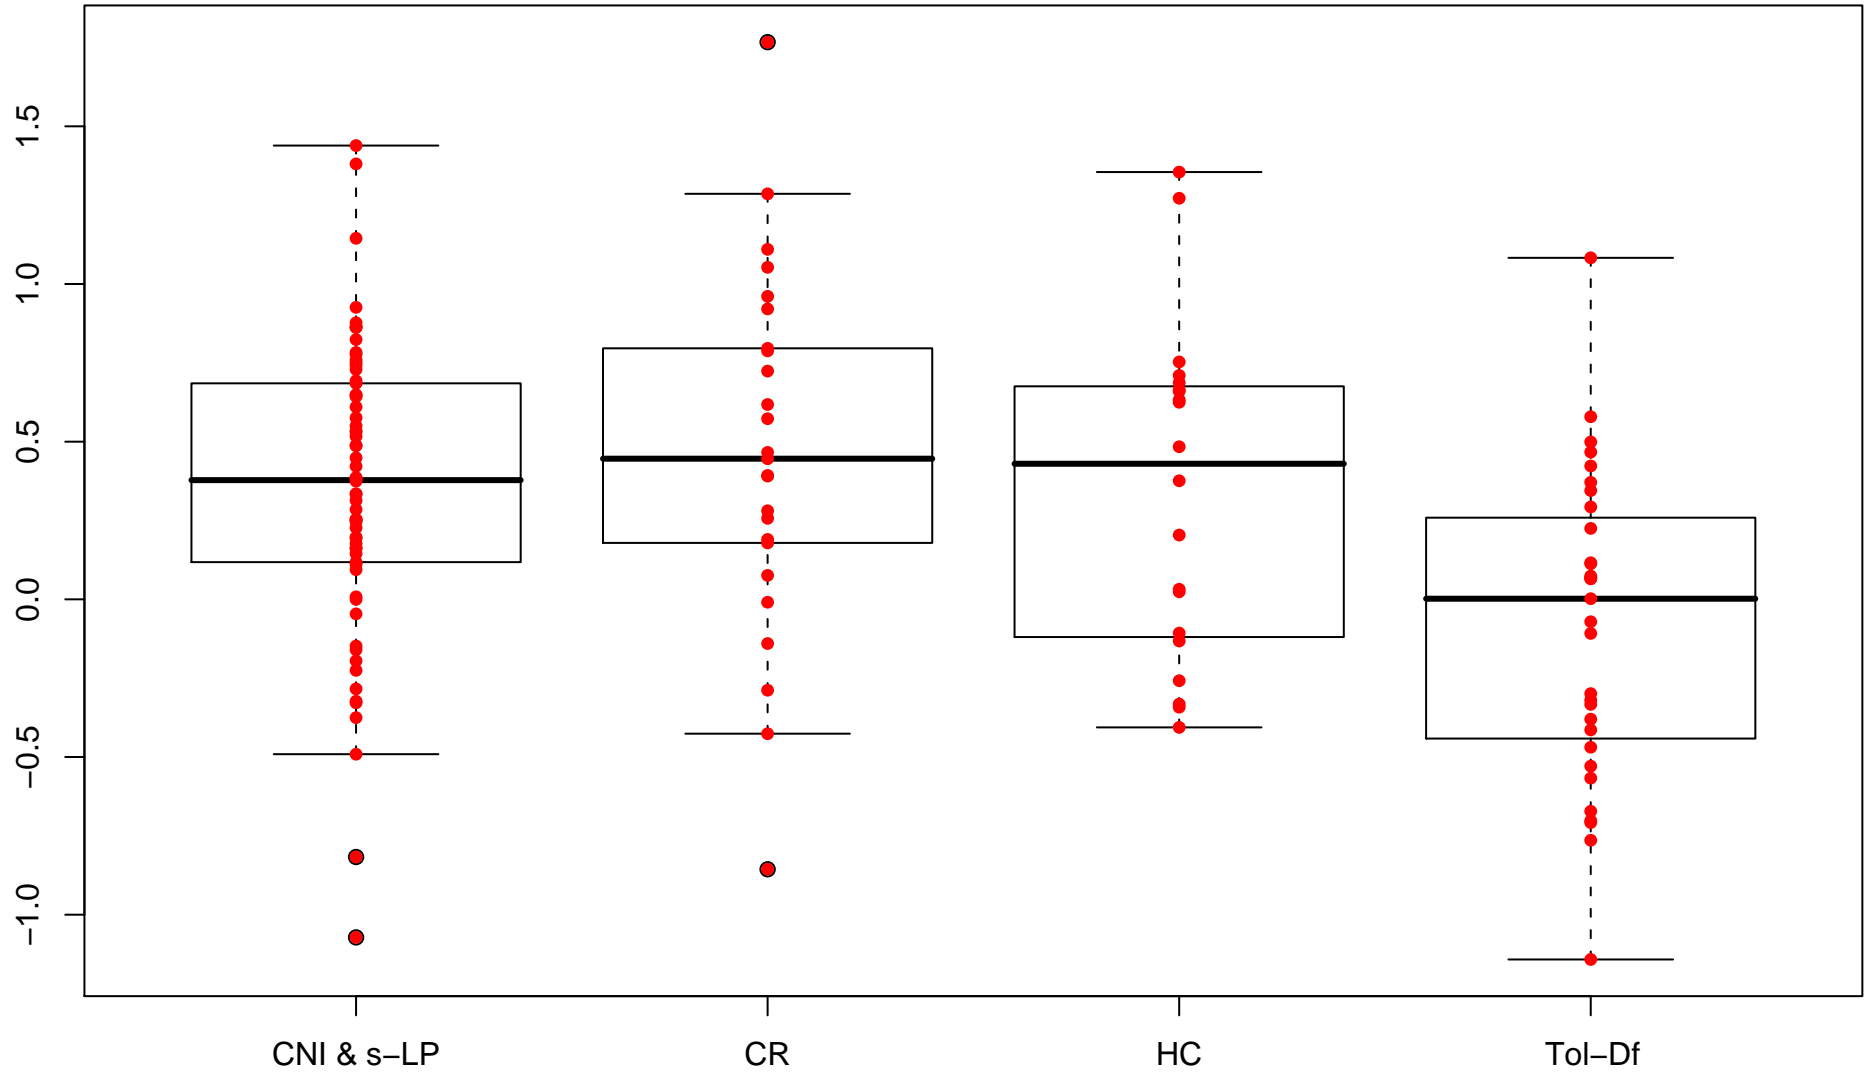

Rank 493 : CASP5  
0.00022889

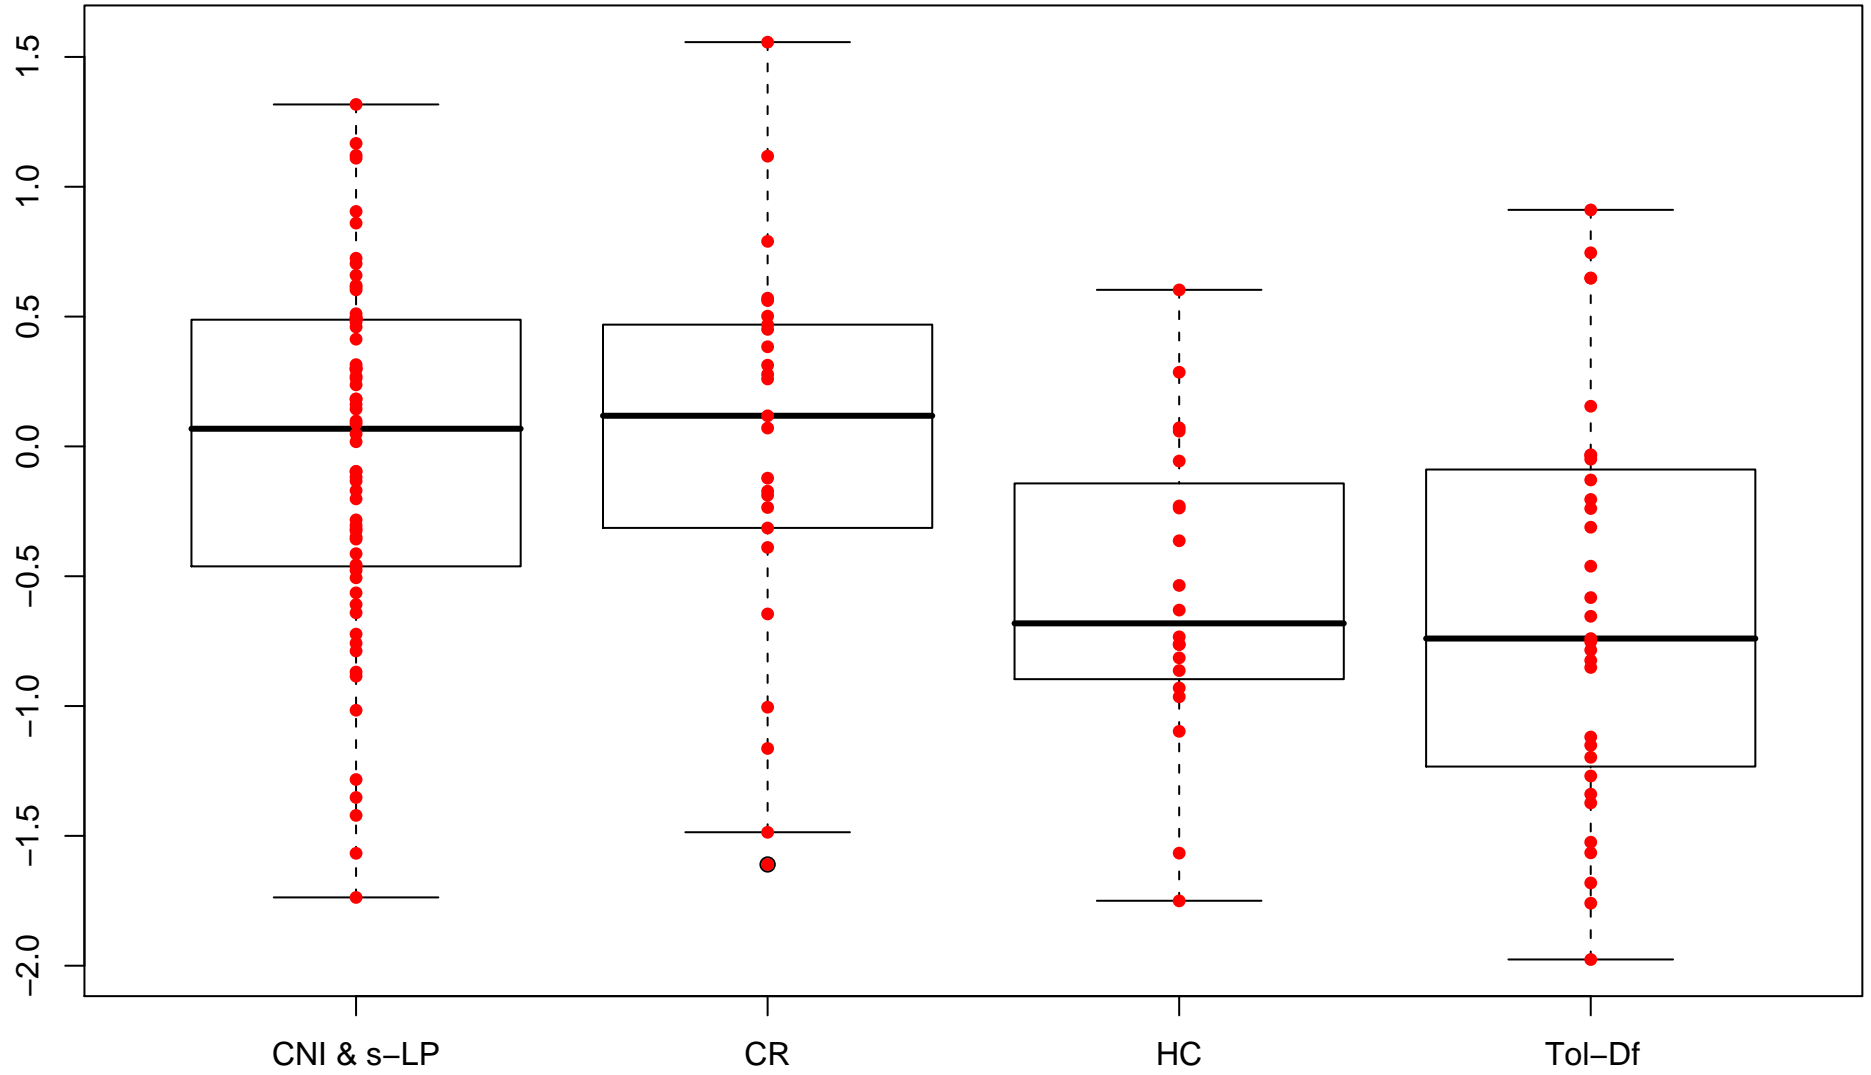

Rank 494 : DIMT1L  
0.00022975

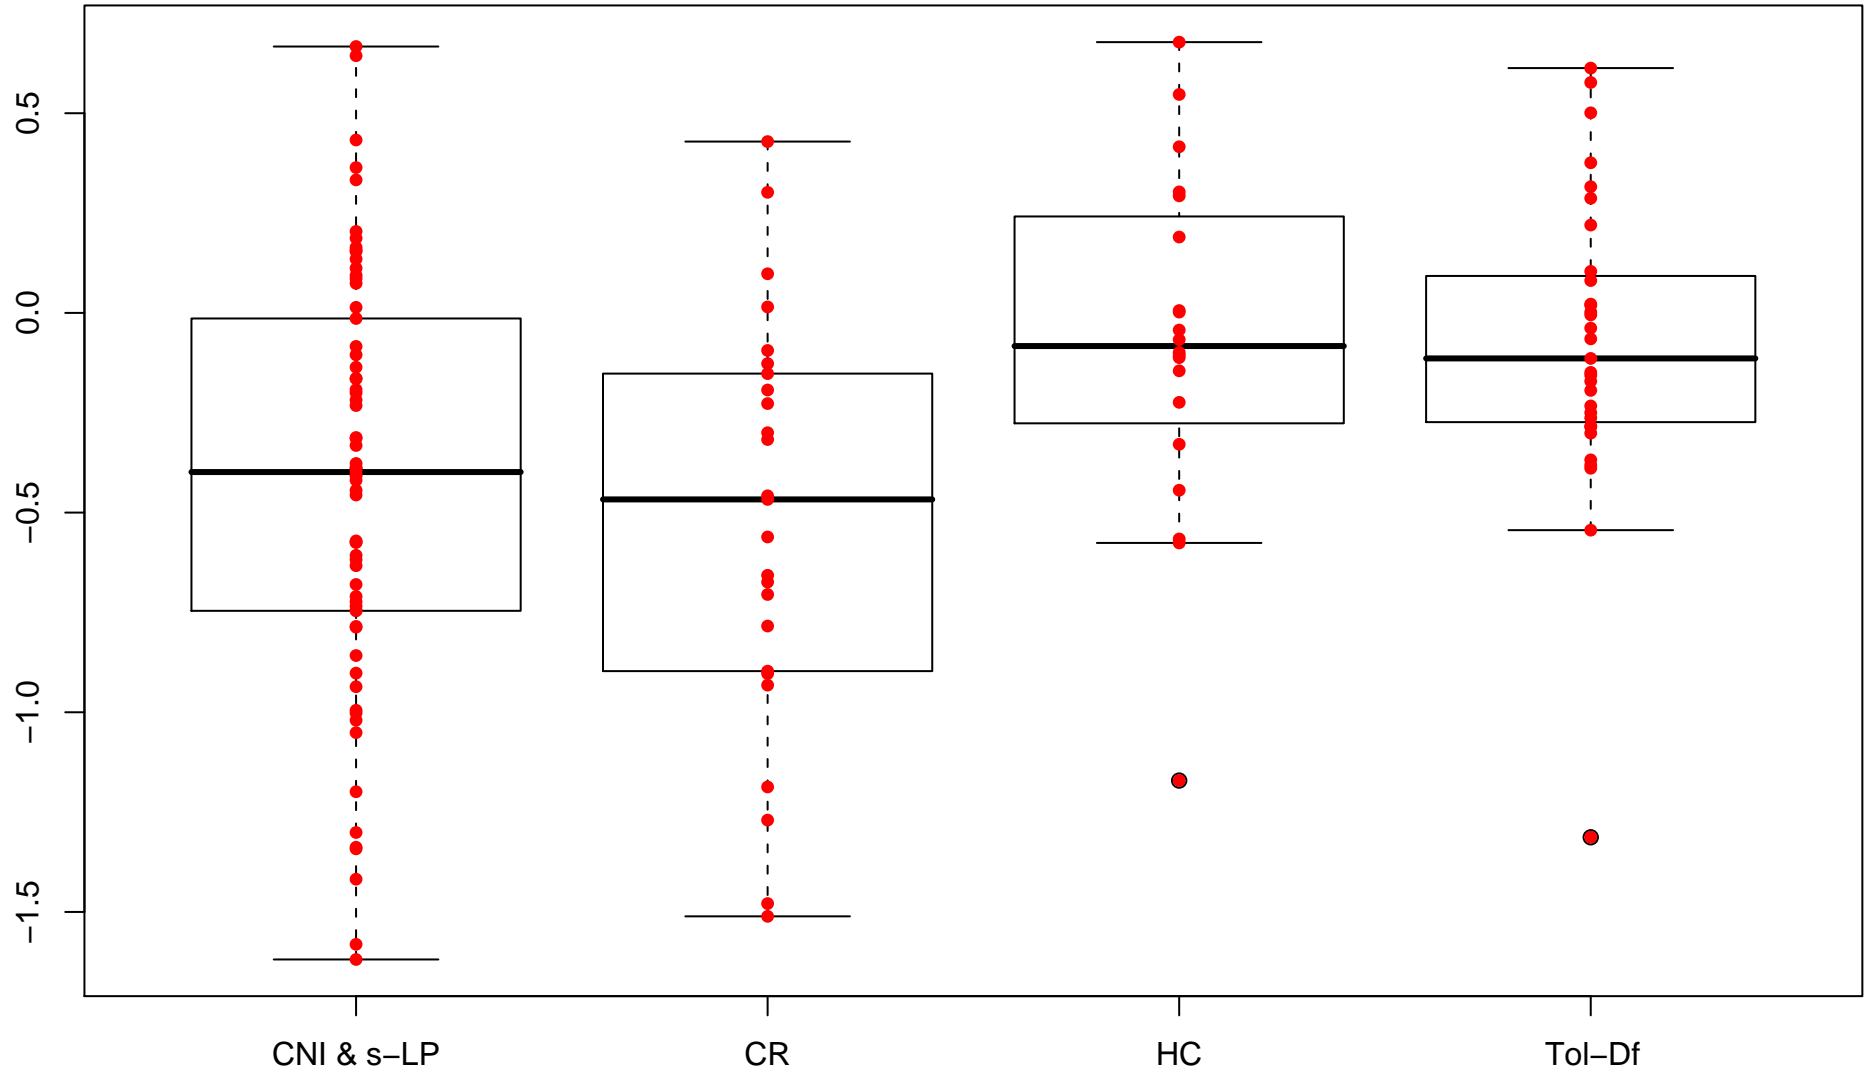

Rank 495 : GNB4  
0.00023283

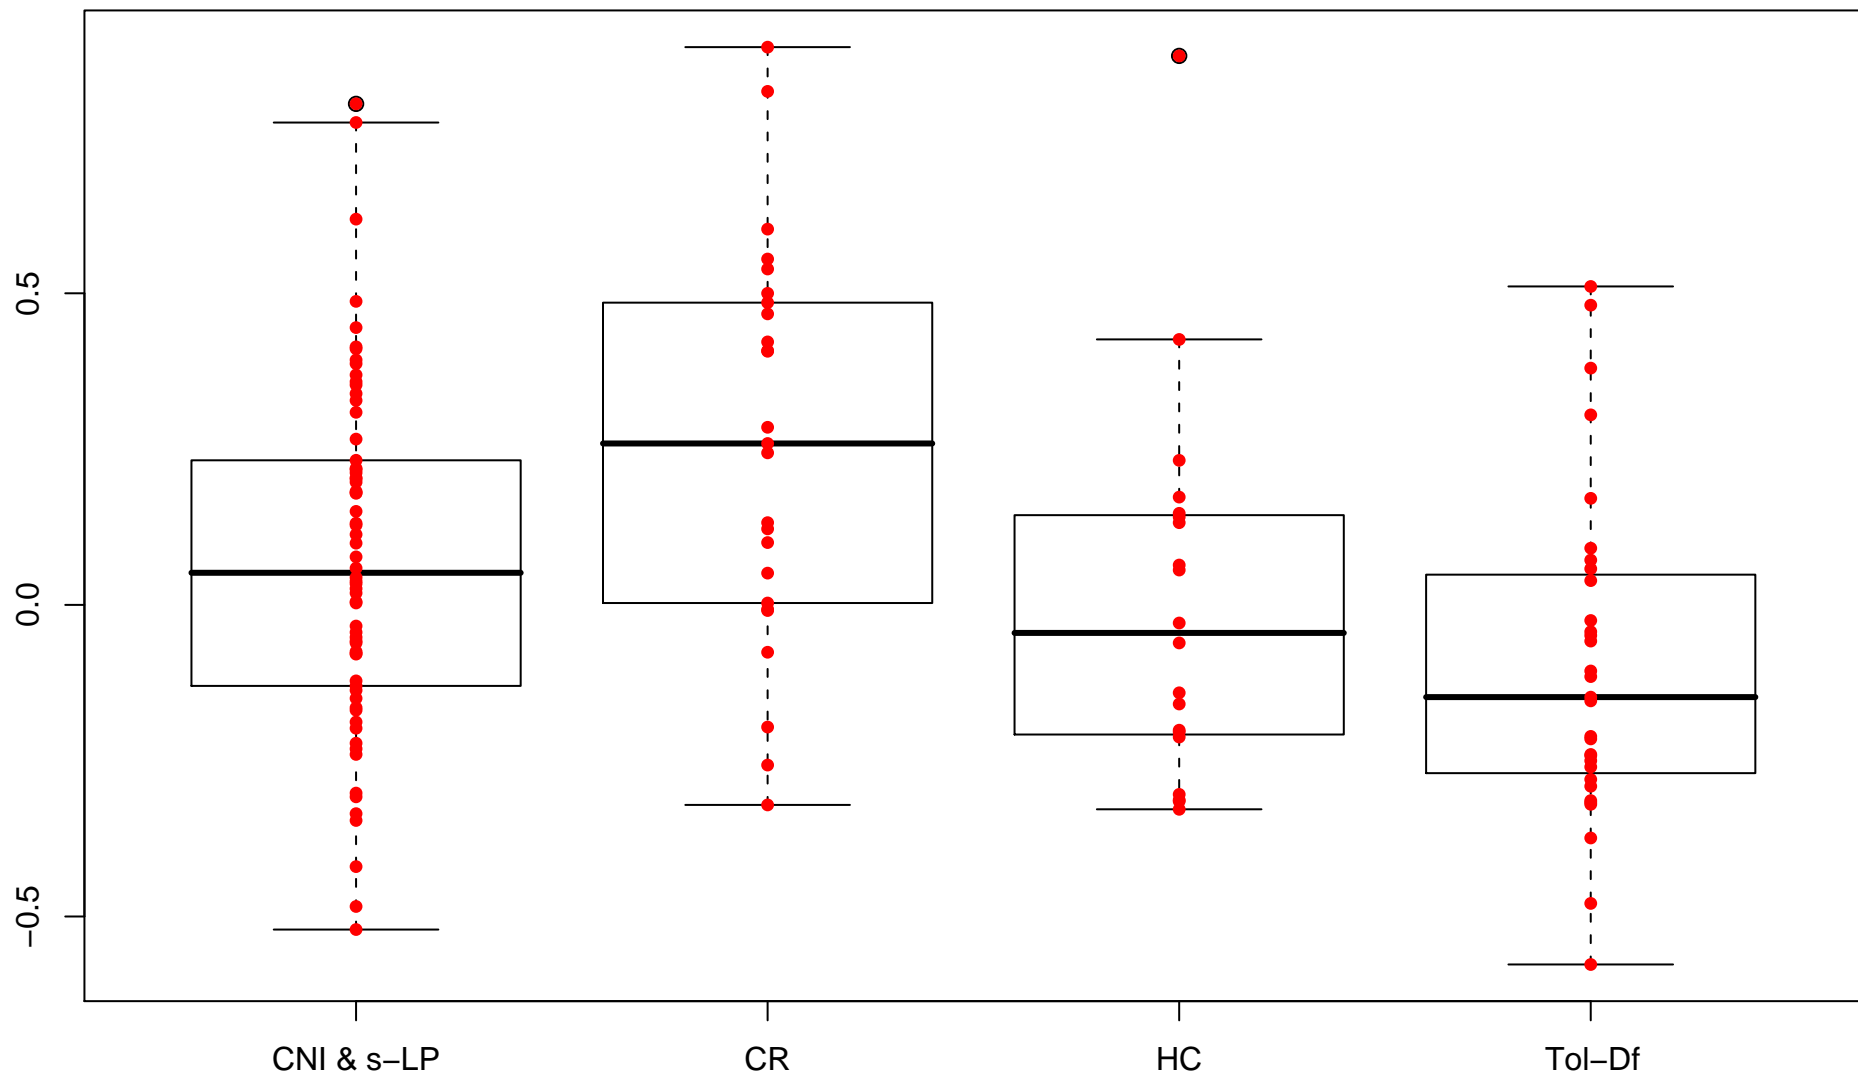



Rank 496 : TNFAIP6  
0.0002335

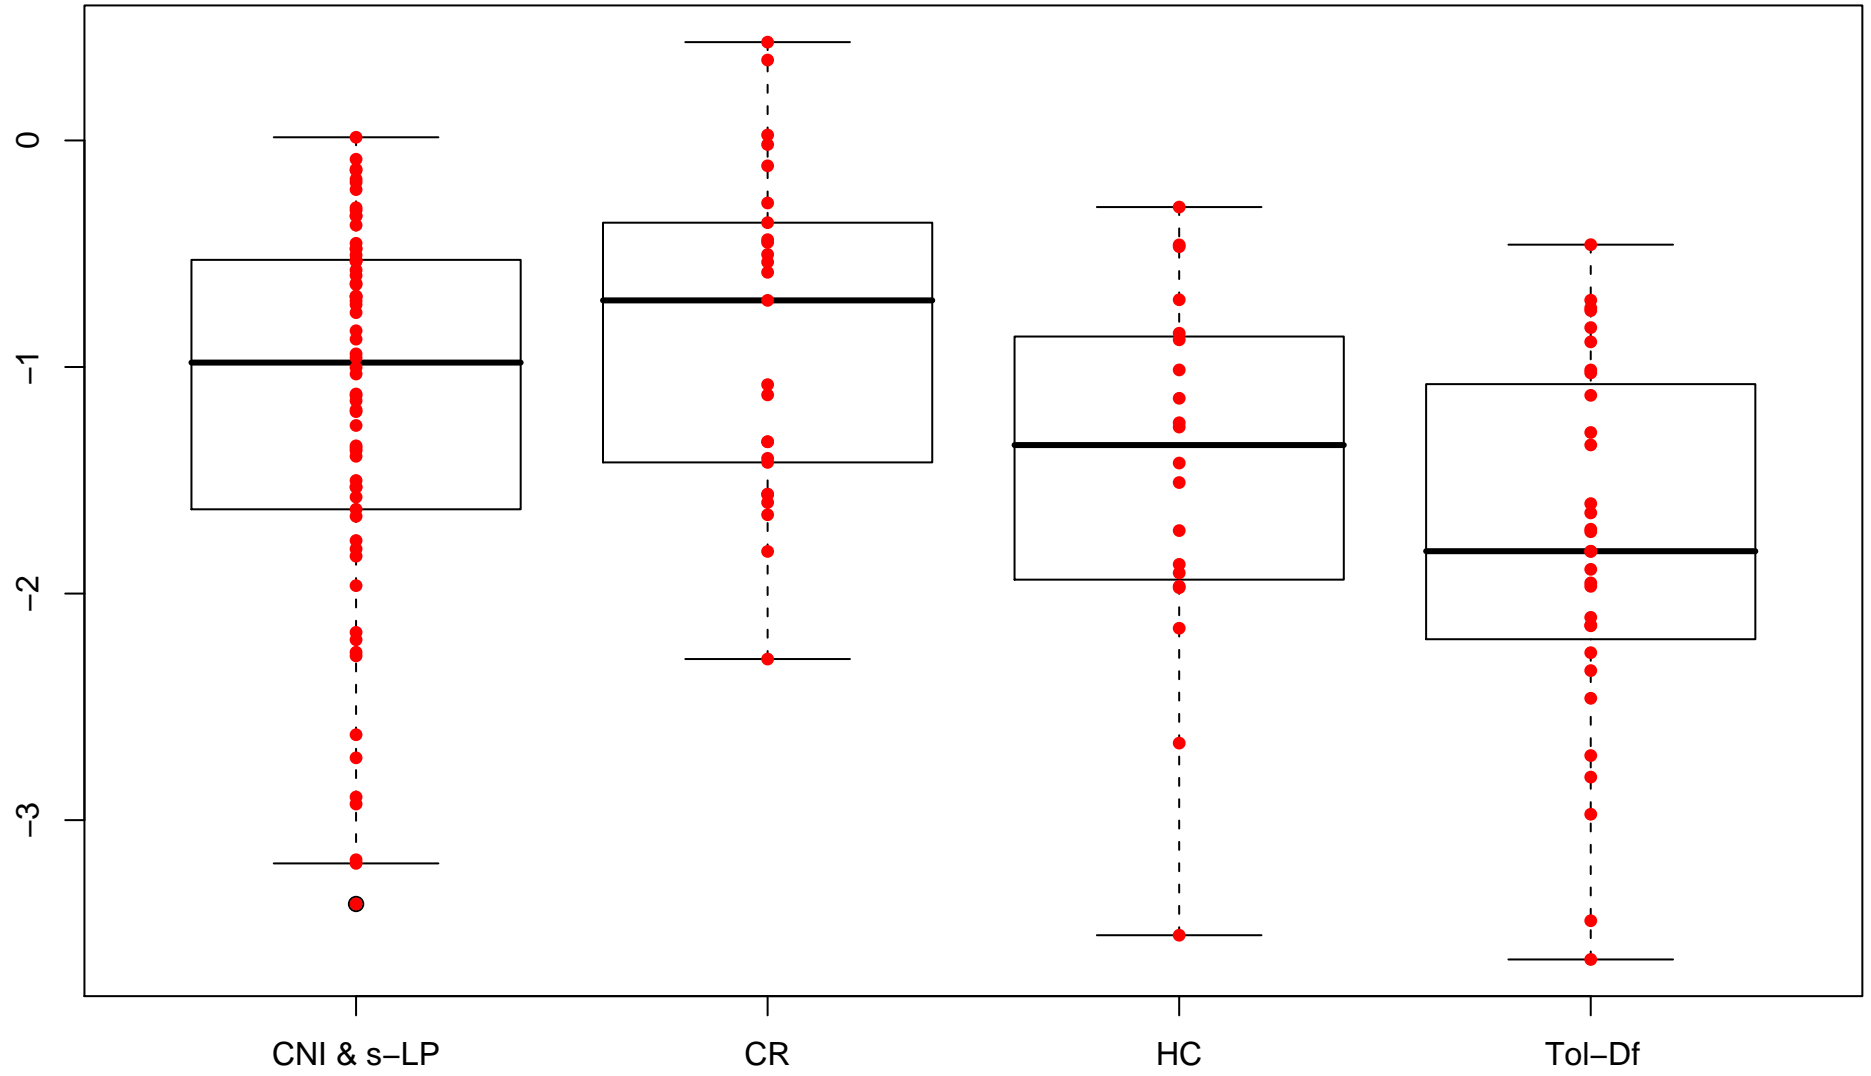

Rank 497 : IL1RN  
0.00023505

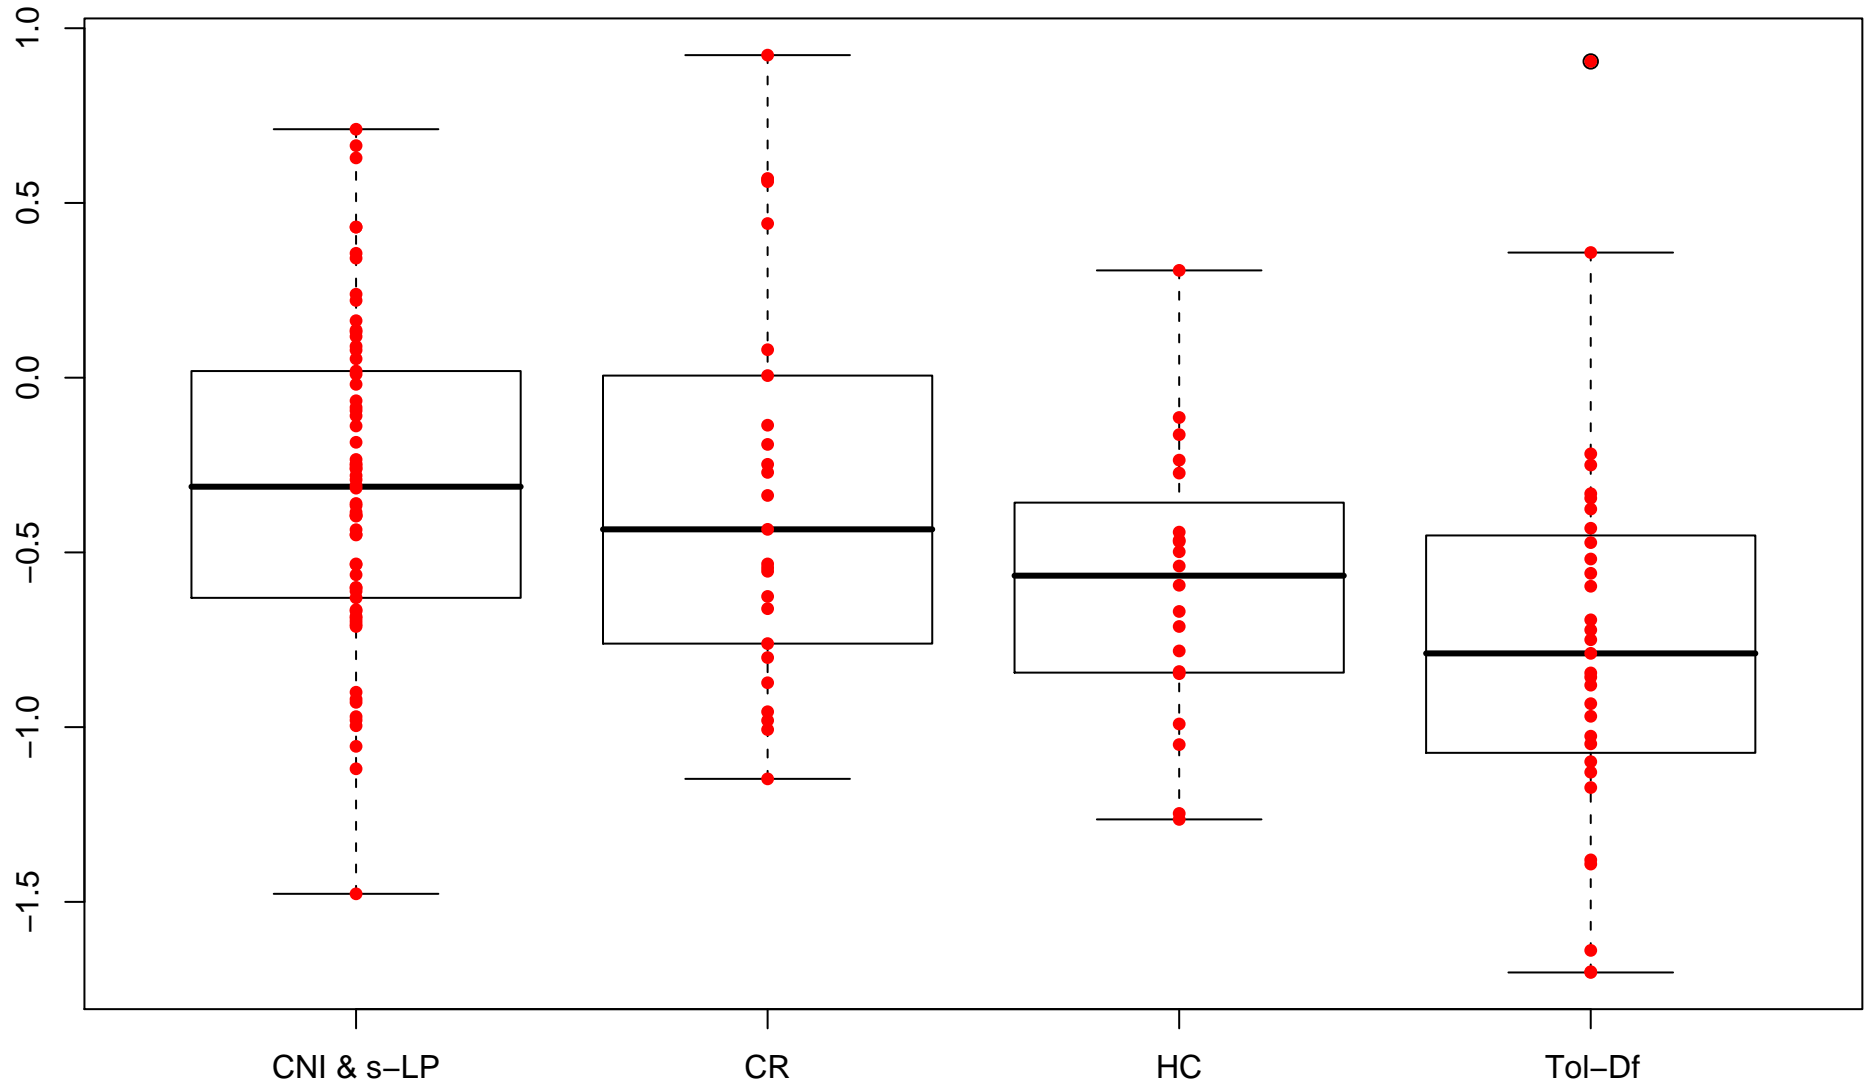

Rank 498 : DFNB59  
0.00023717

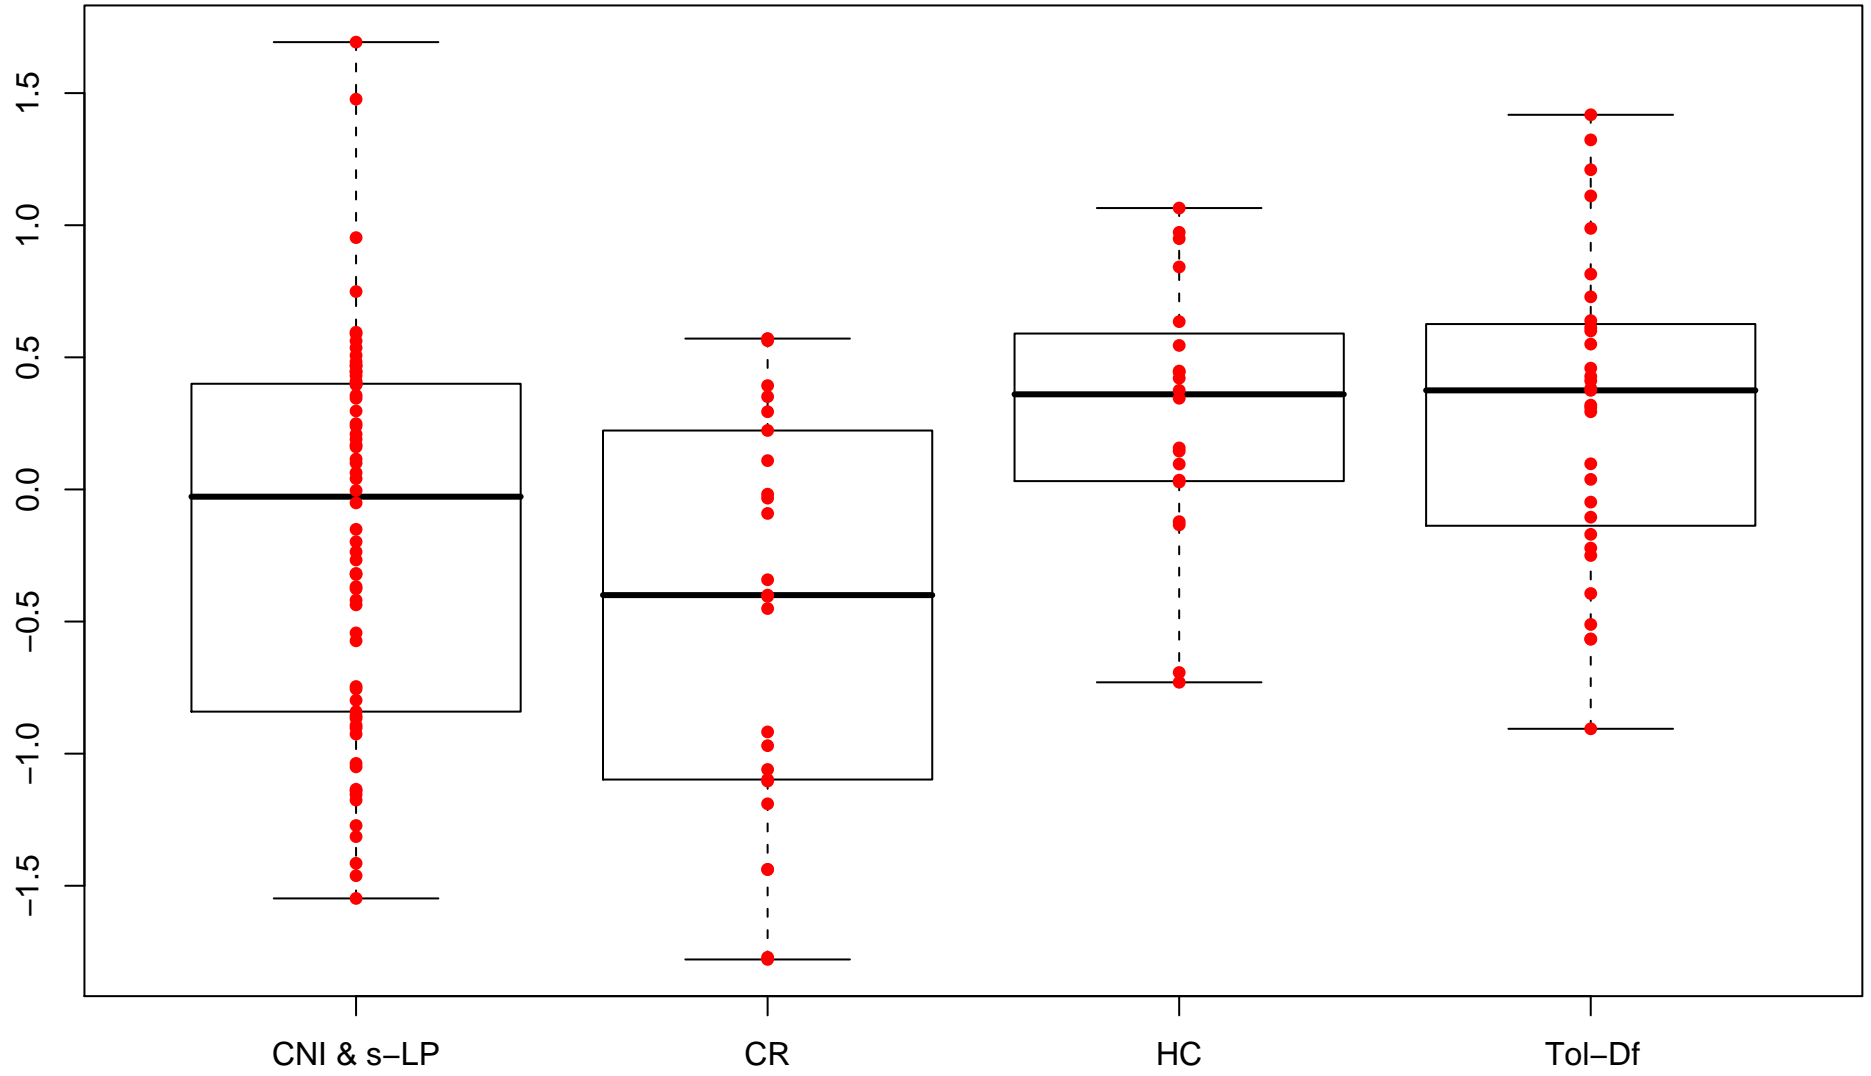

Rank 499 : EXOSC1  
0.00024209

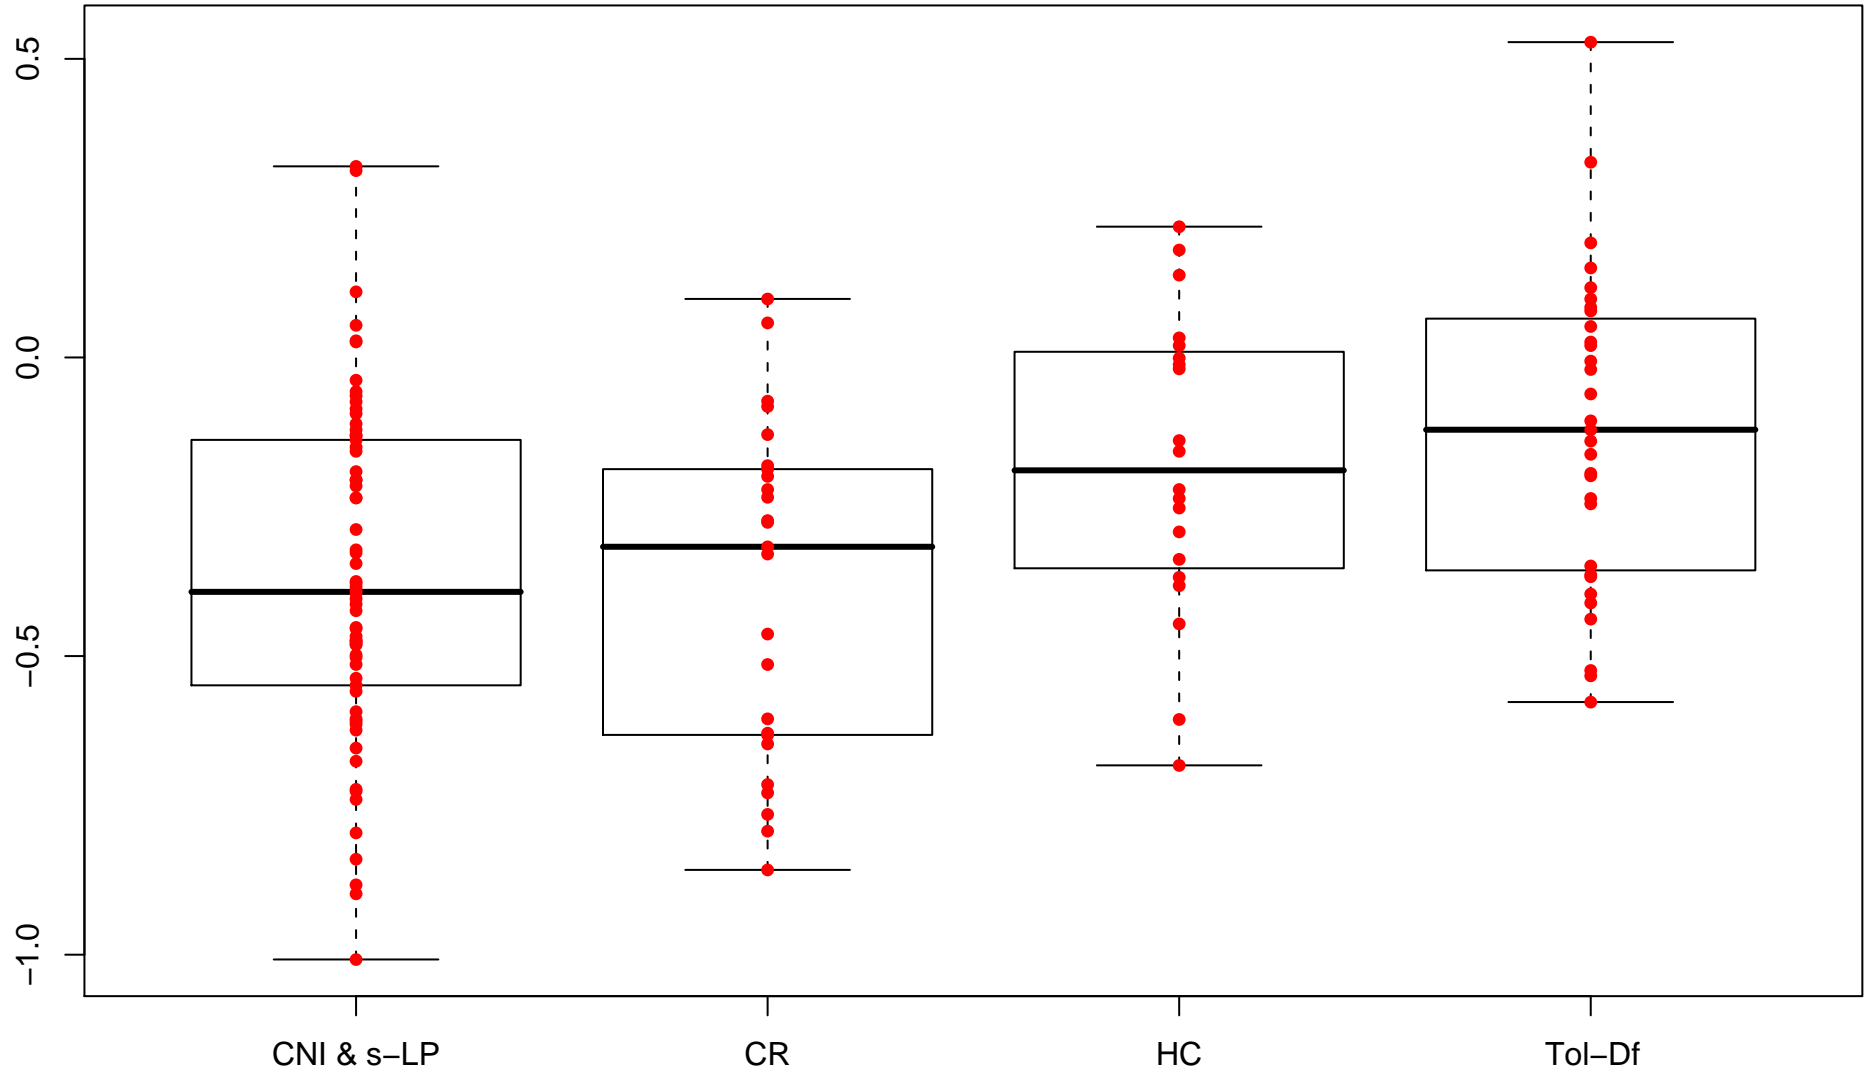

Rank 500 : SLC25A4  
0.00024383

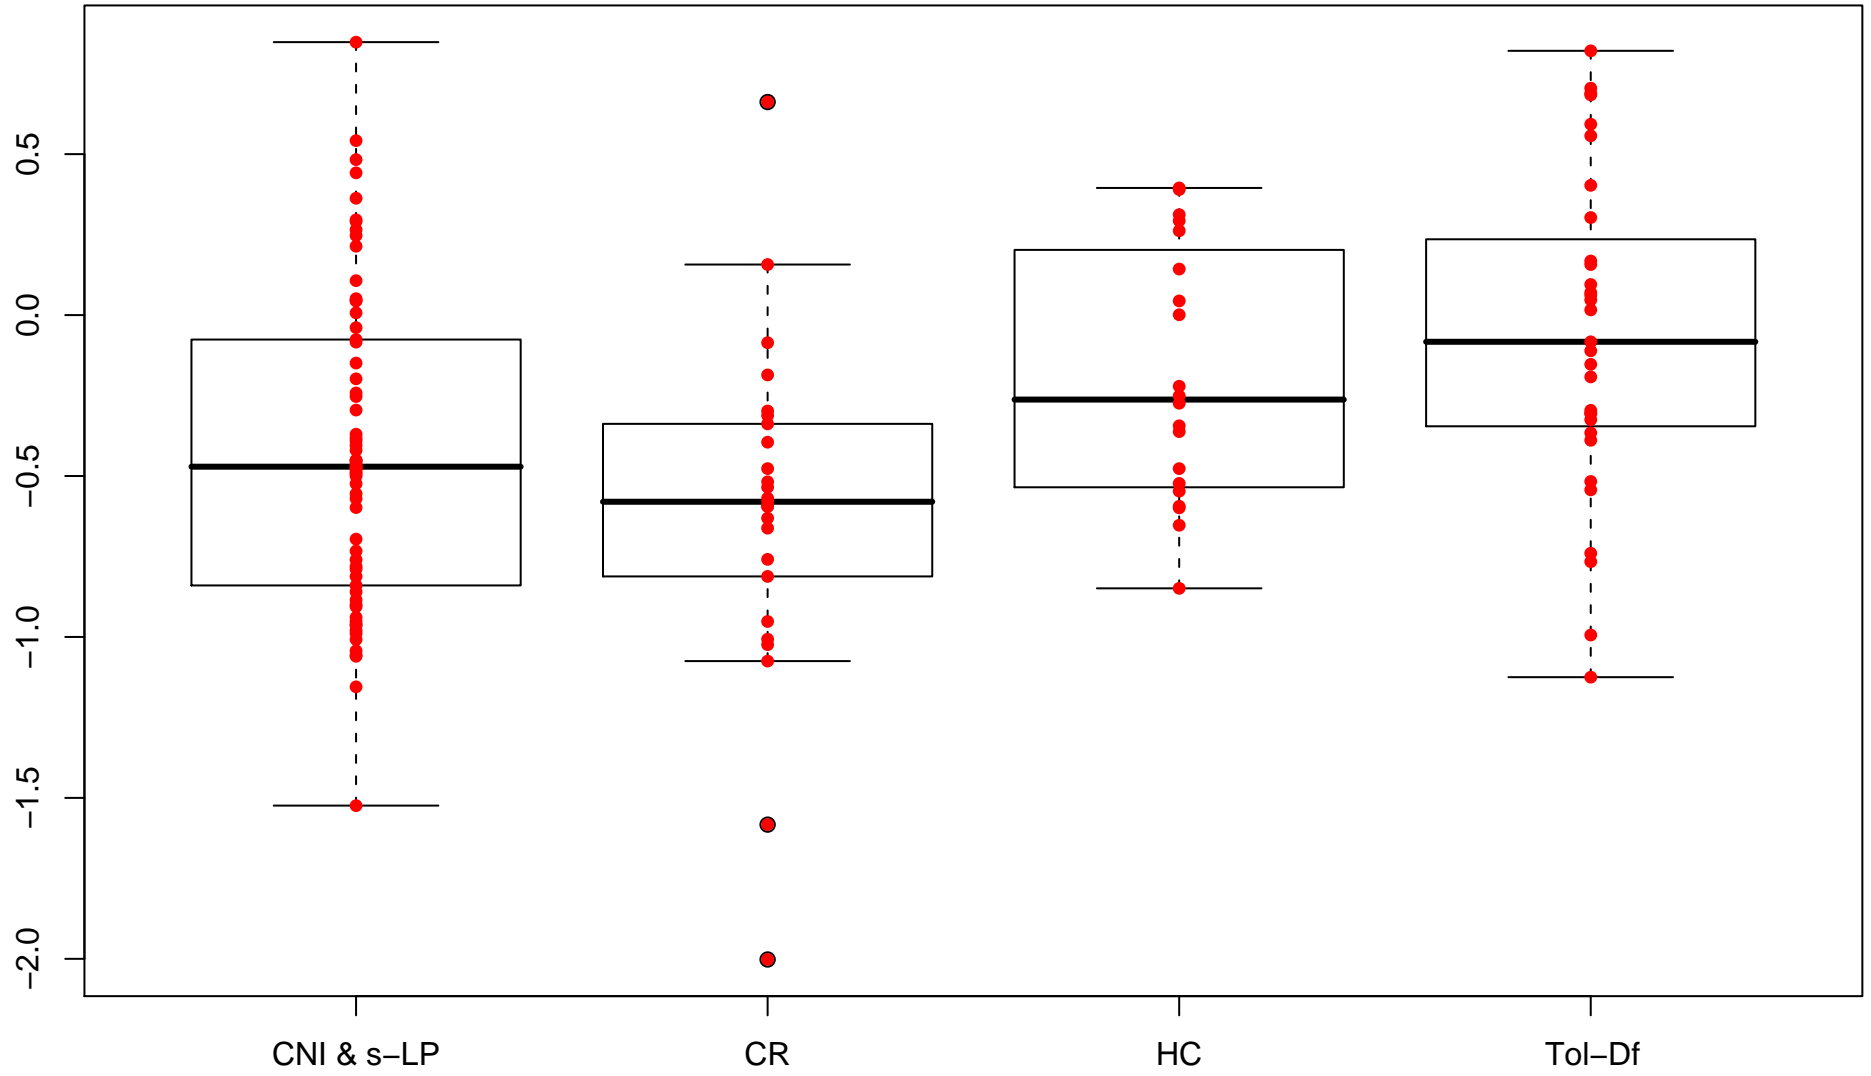

Rank 501 : A\_24\_P492919  
0.00024464

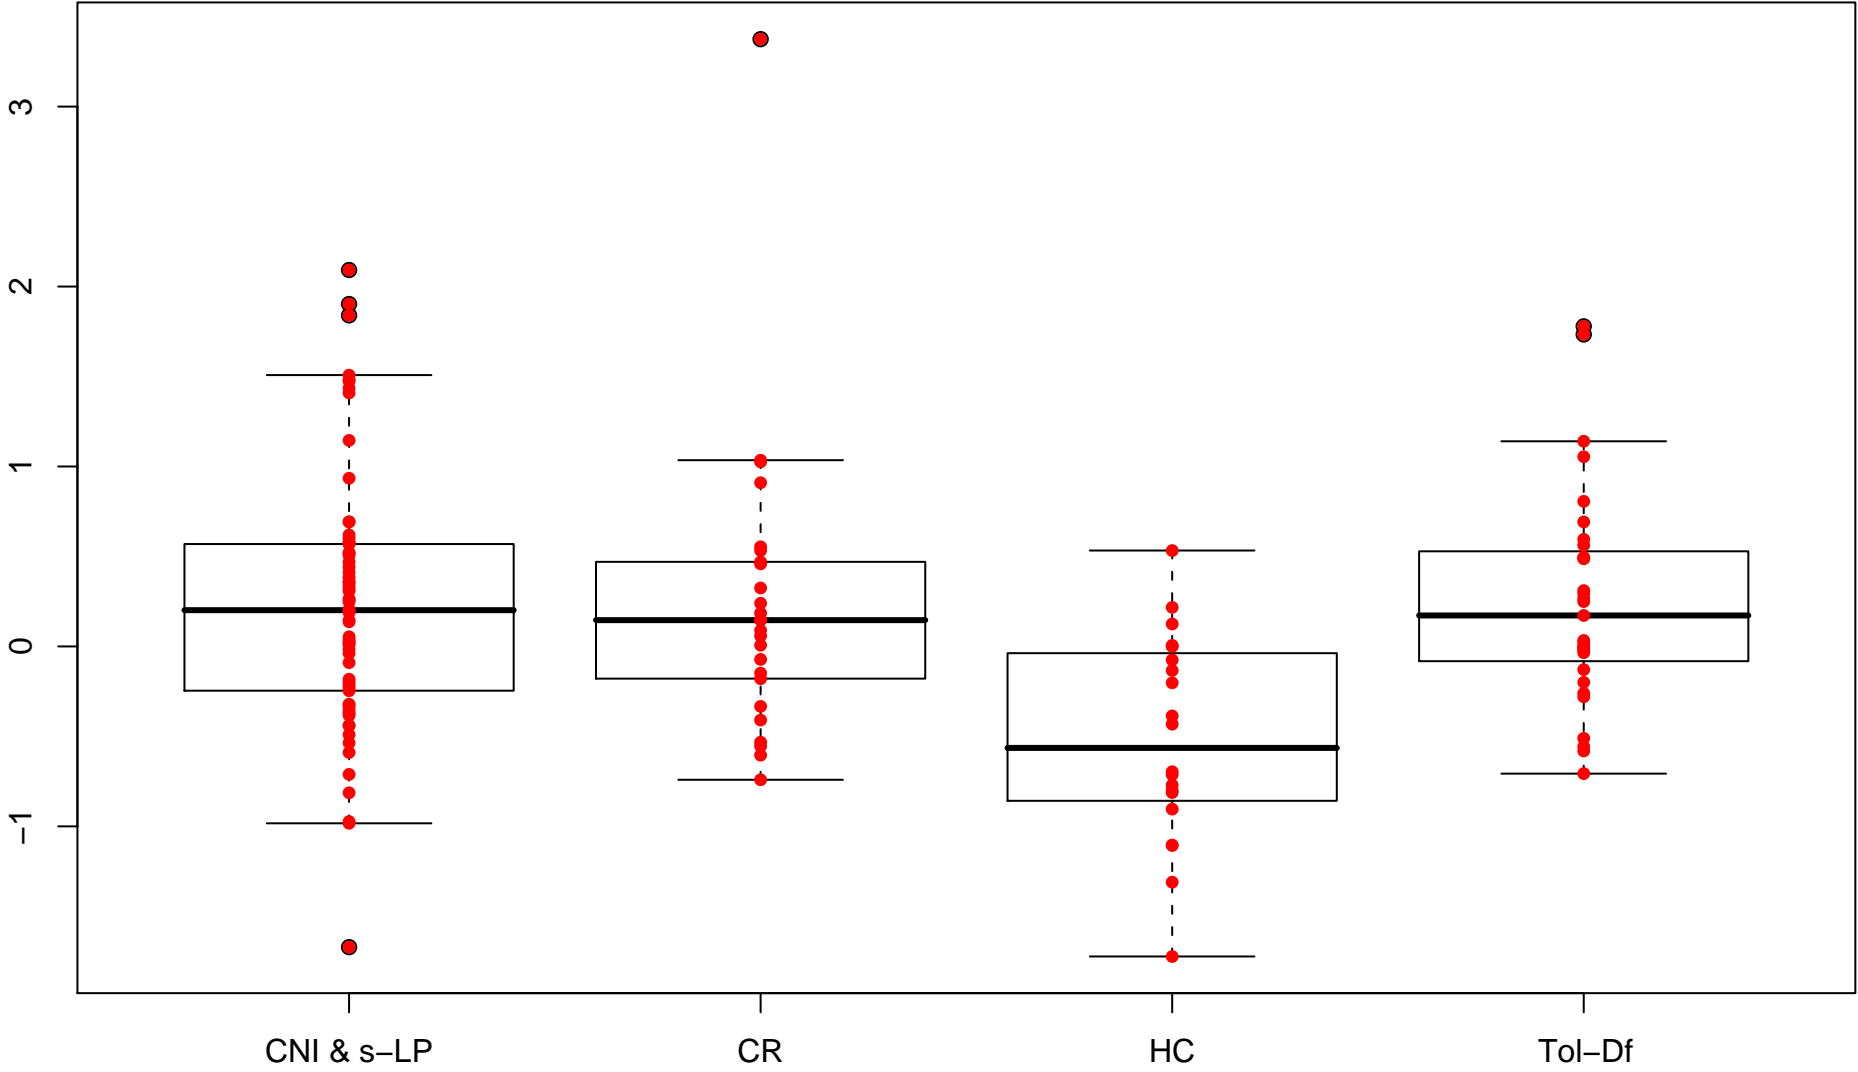

Rank 502 : CARD11  
0.00024517

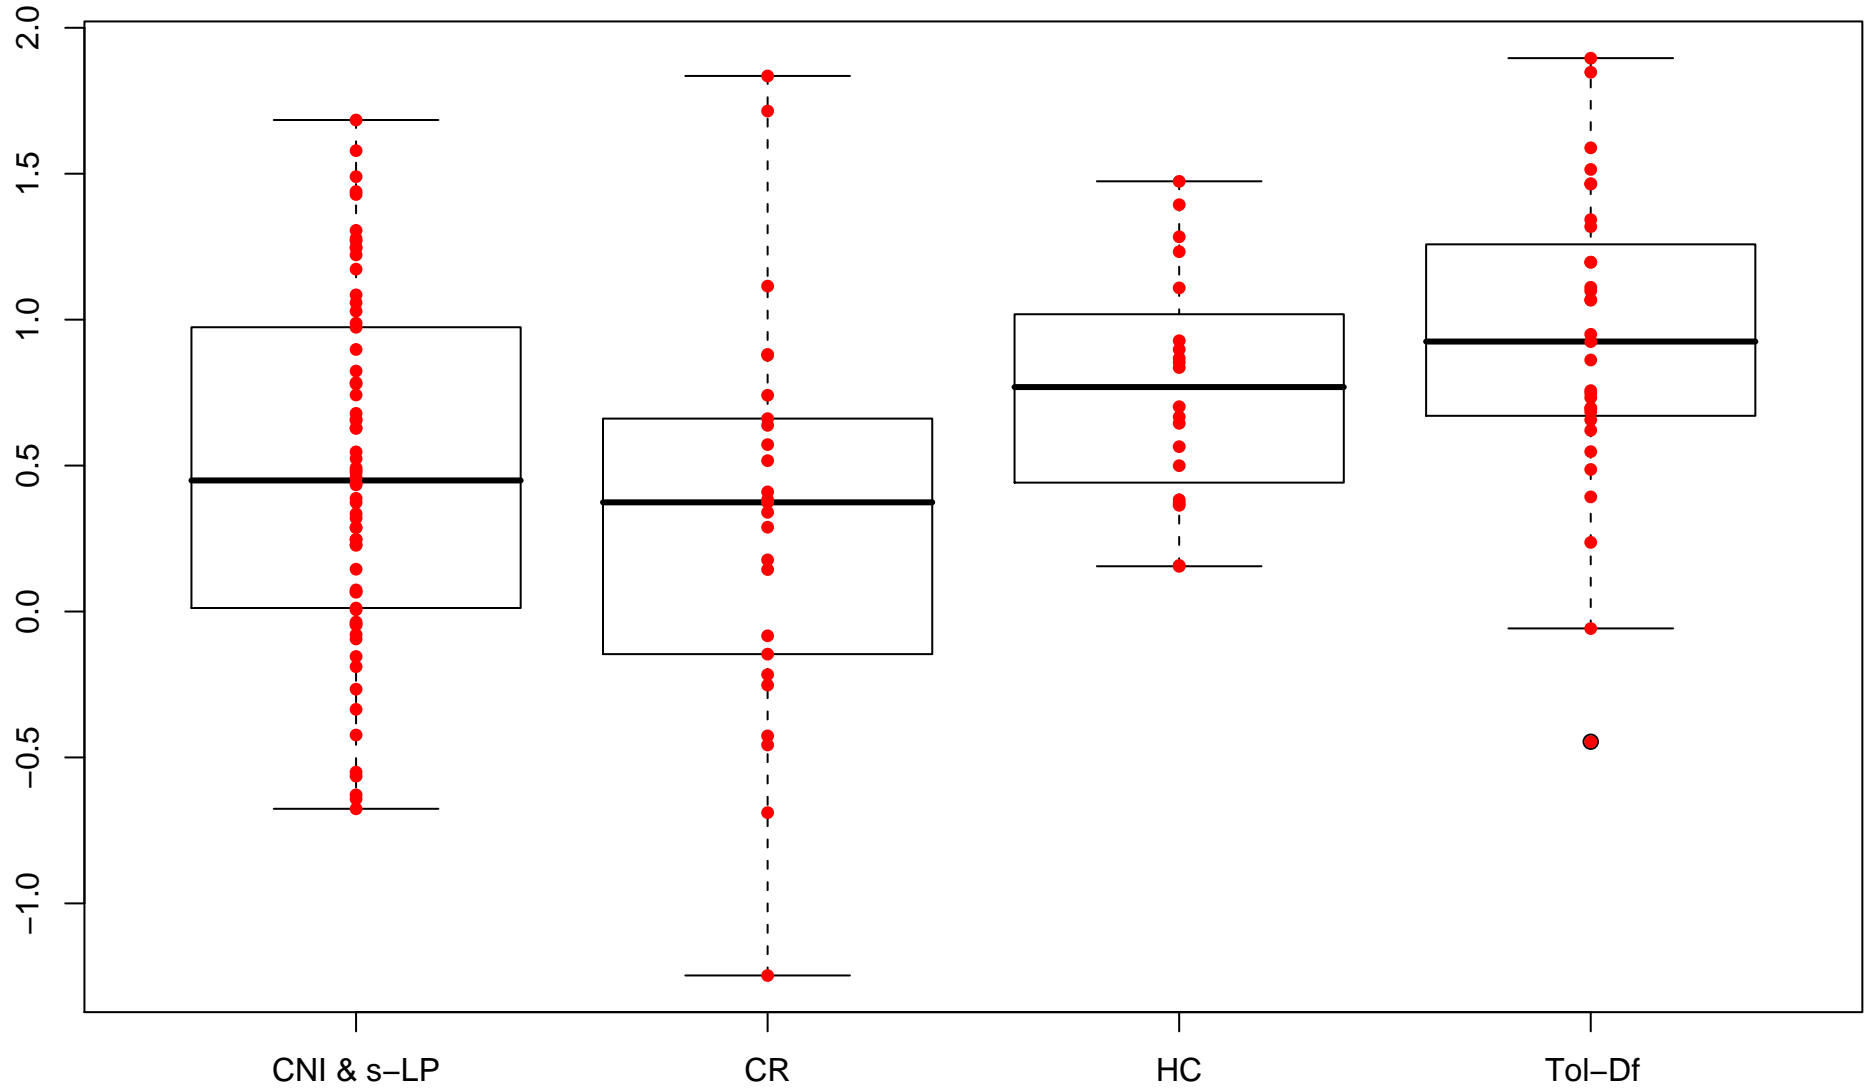

Rank 503 : C1ORF217  
0.00024519

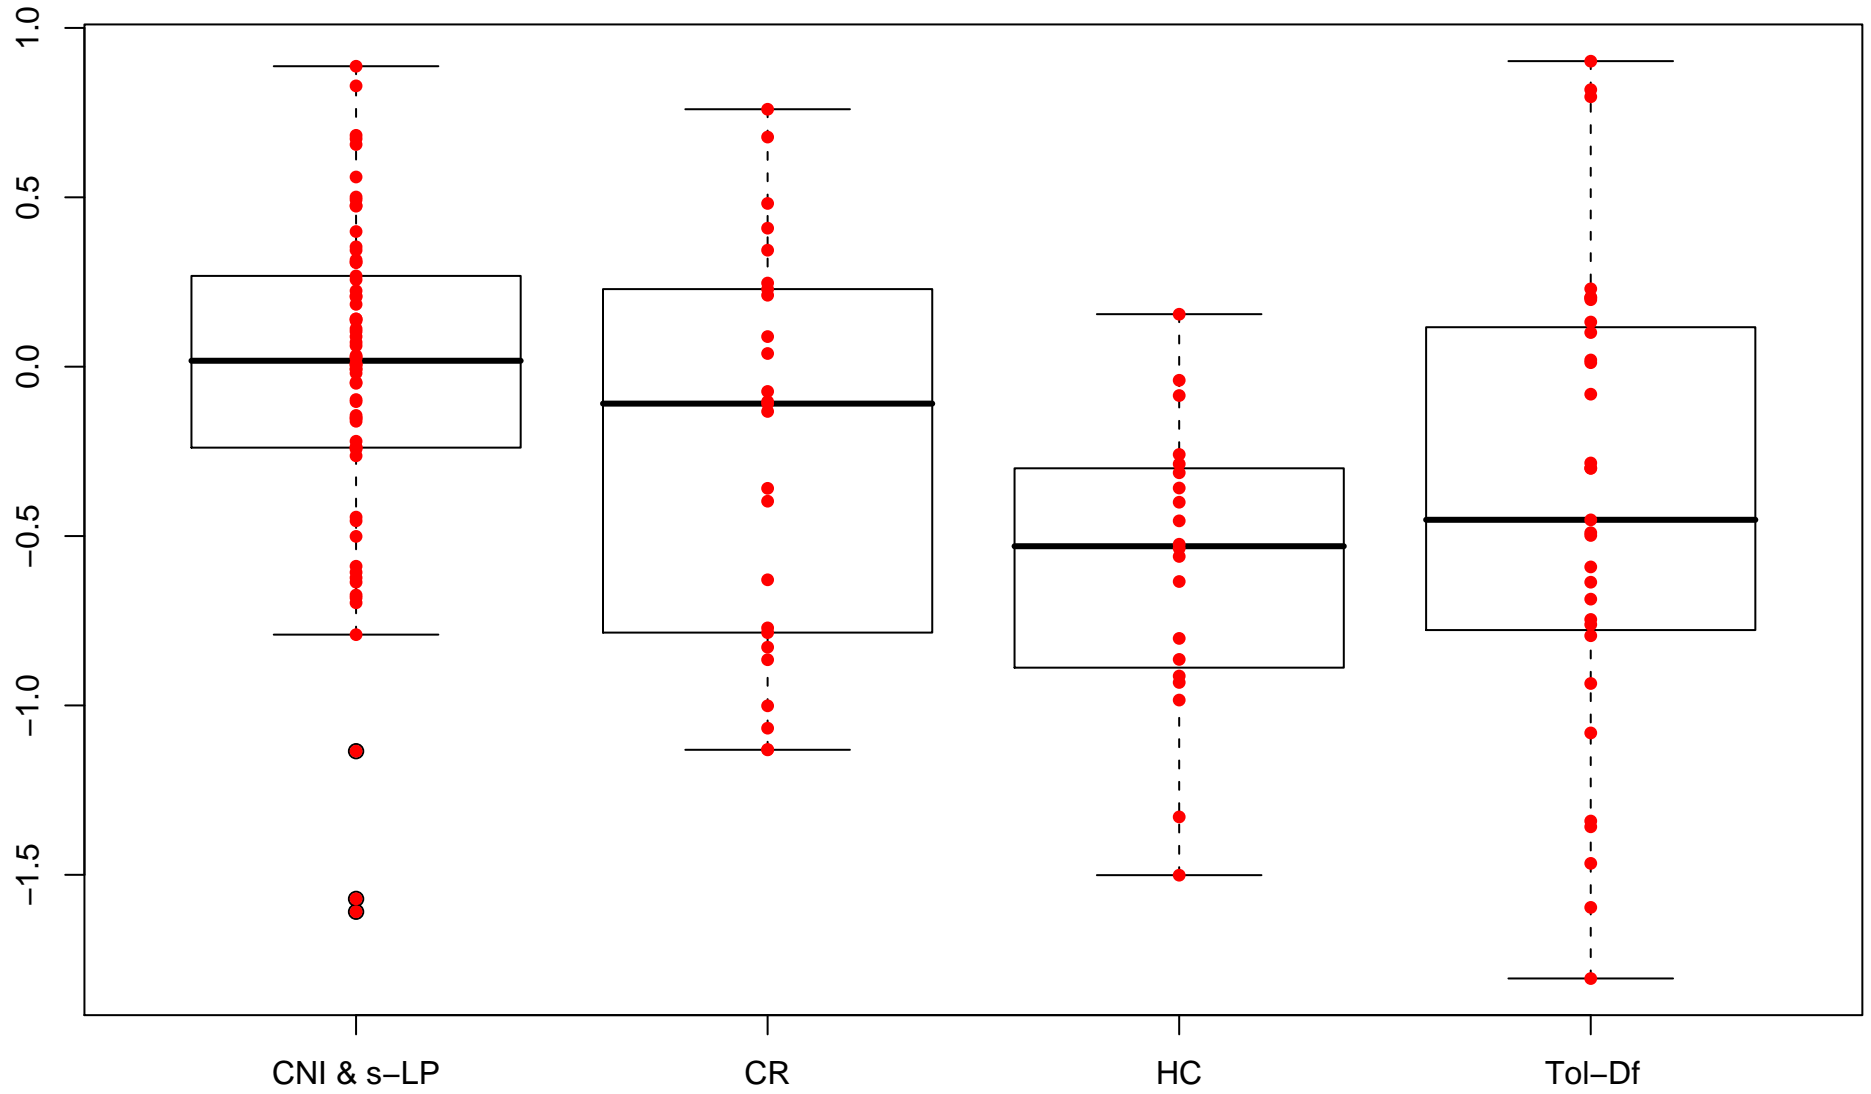



Rank 504 : SLC25A37  
0.00024549

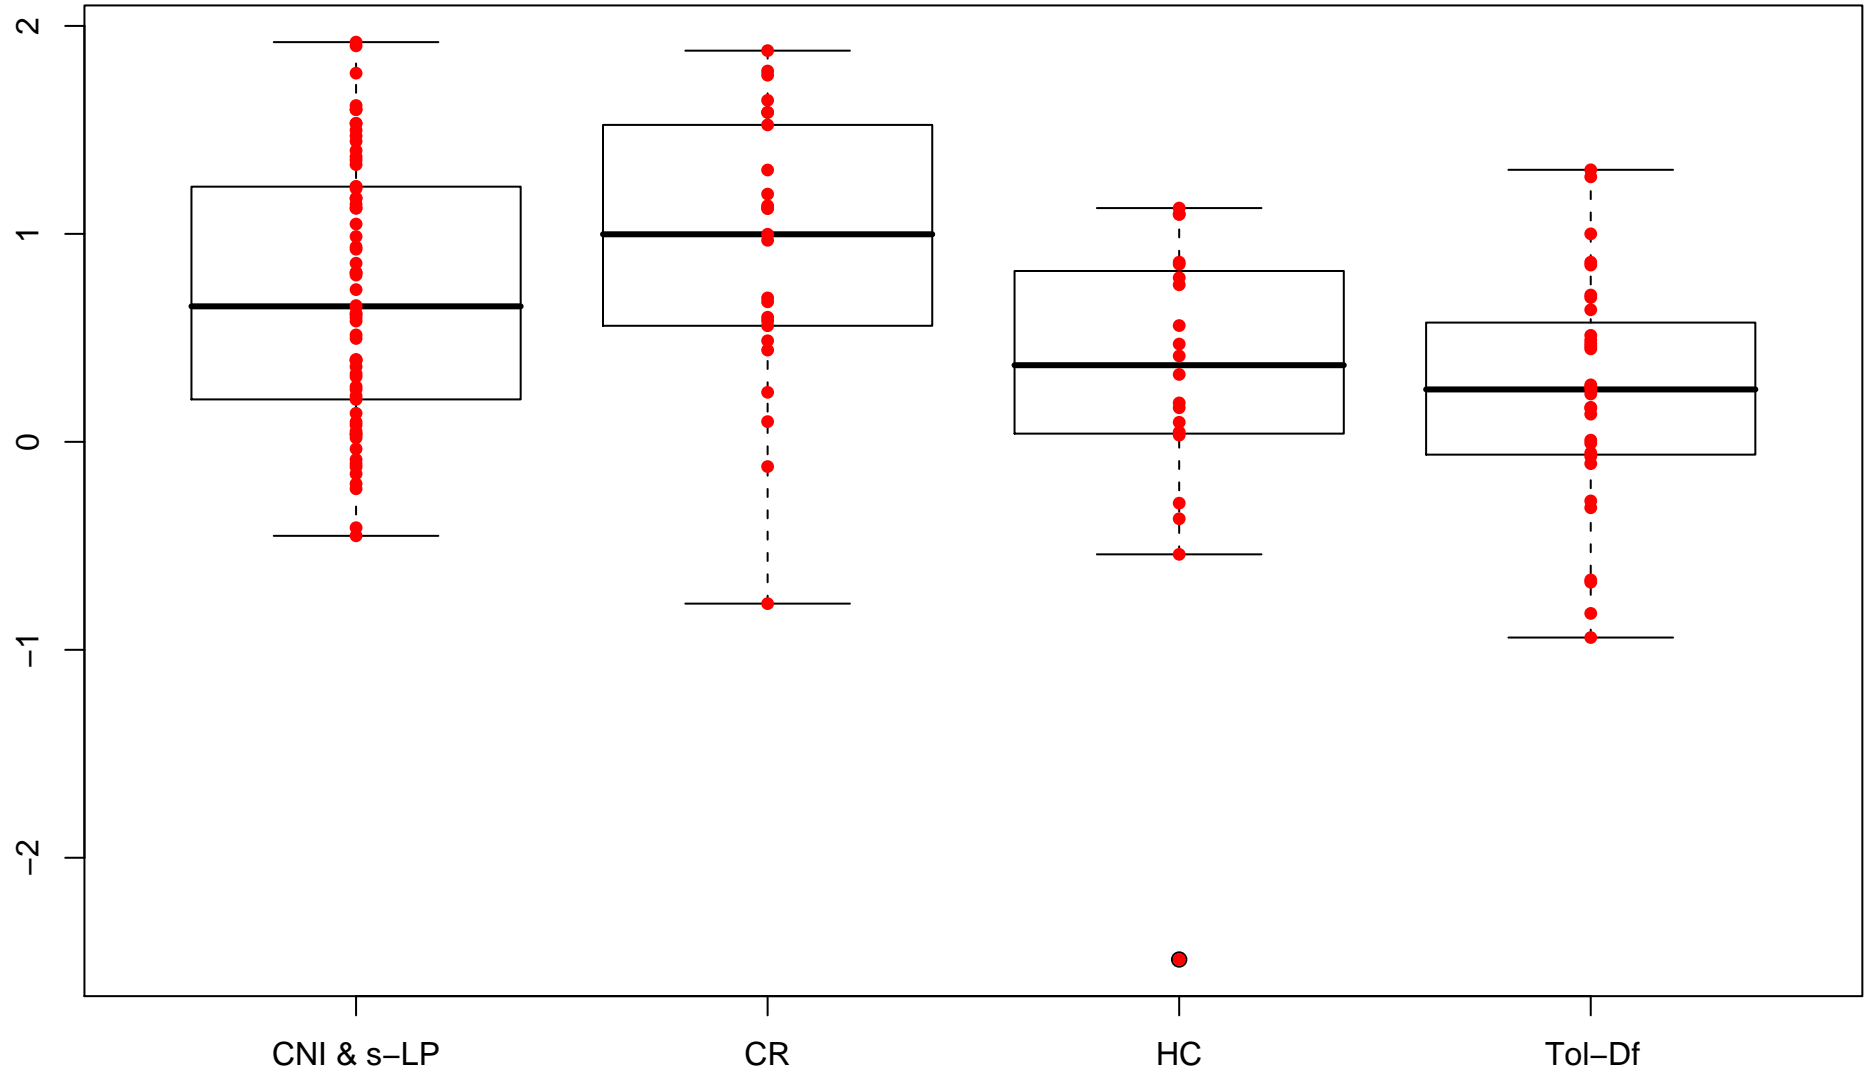

Rank 505 : PSMC6  
0.00024675

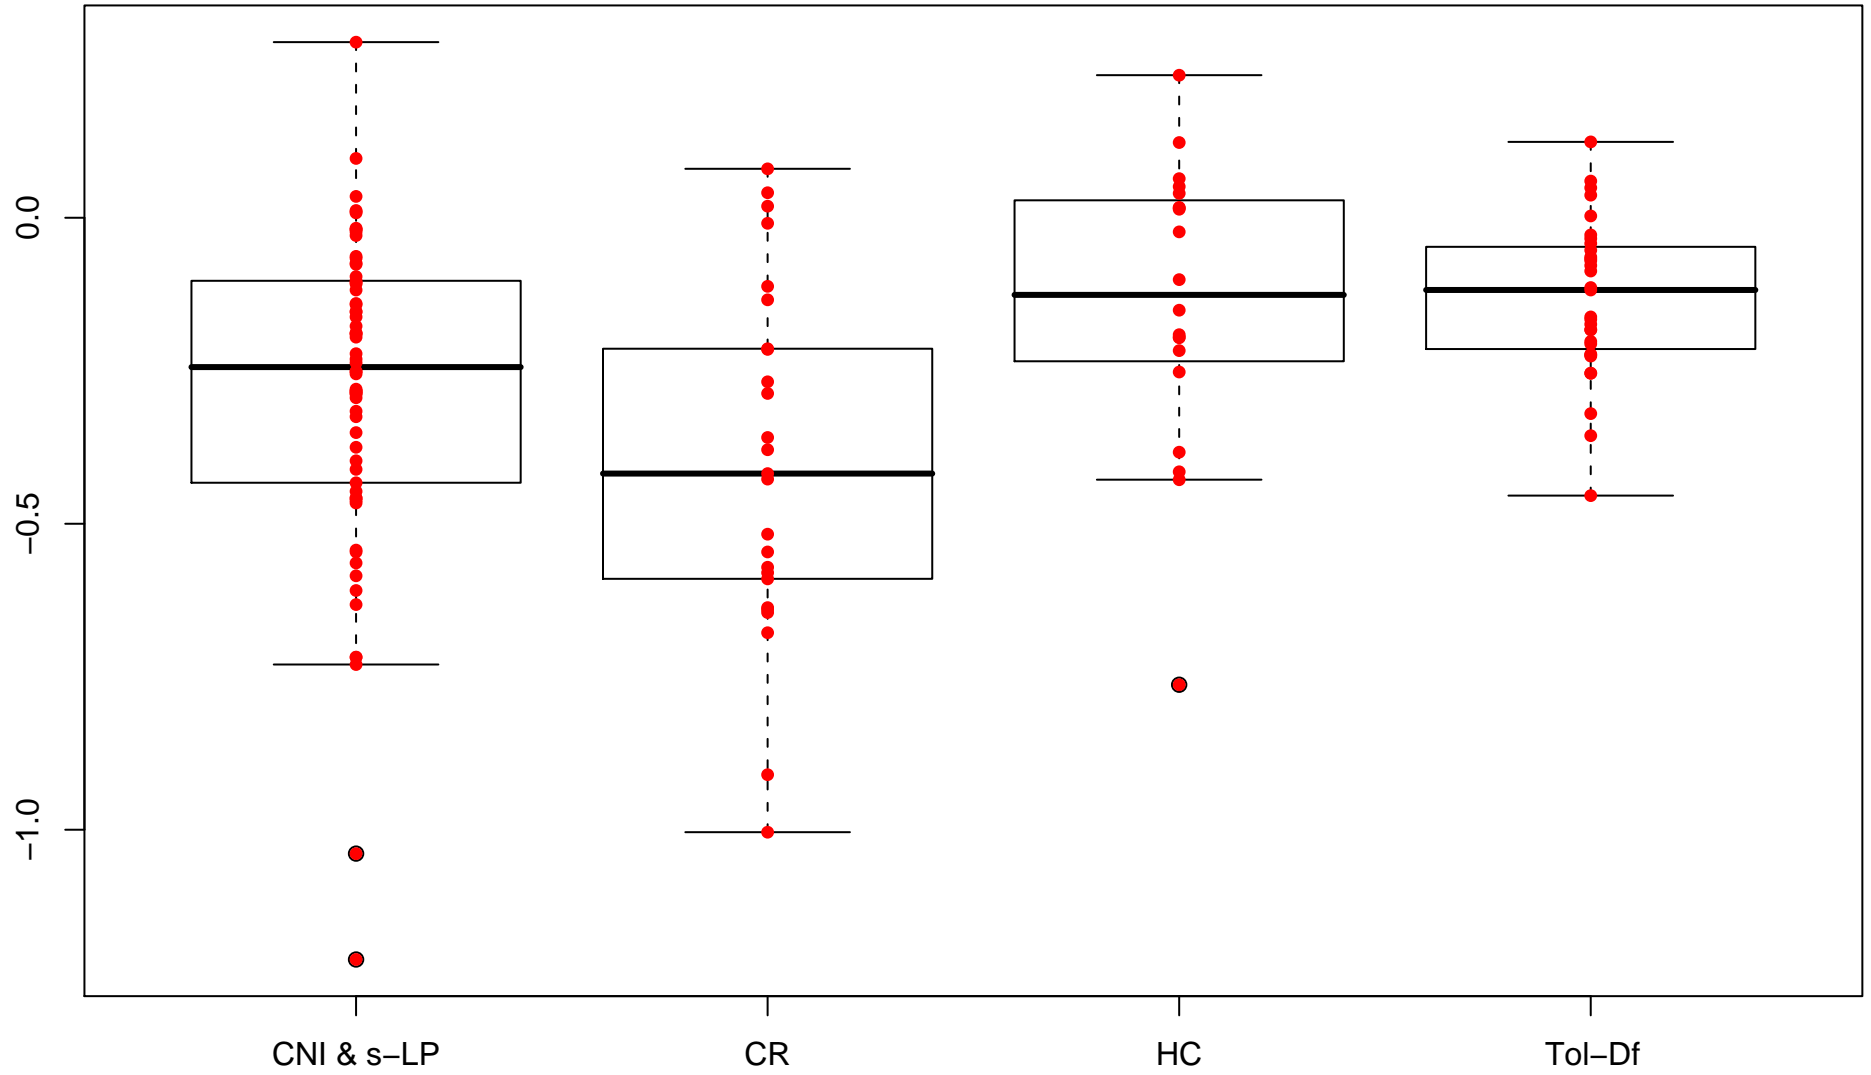

Rank 506 : NFIA  
0.00024803

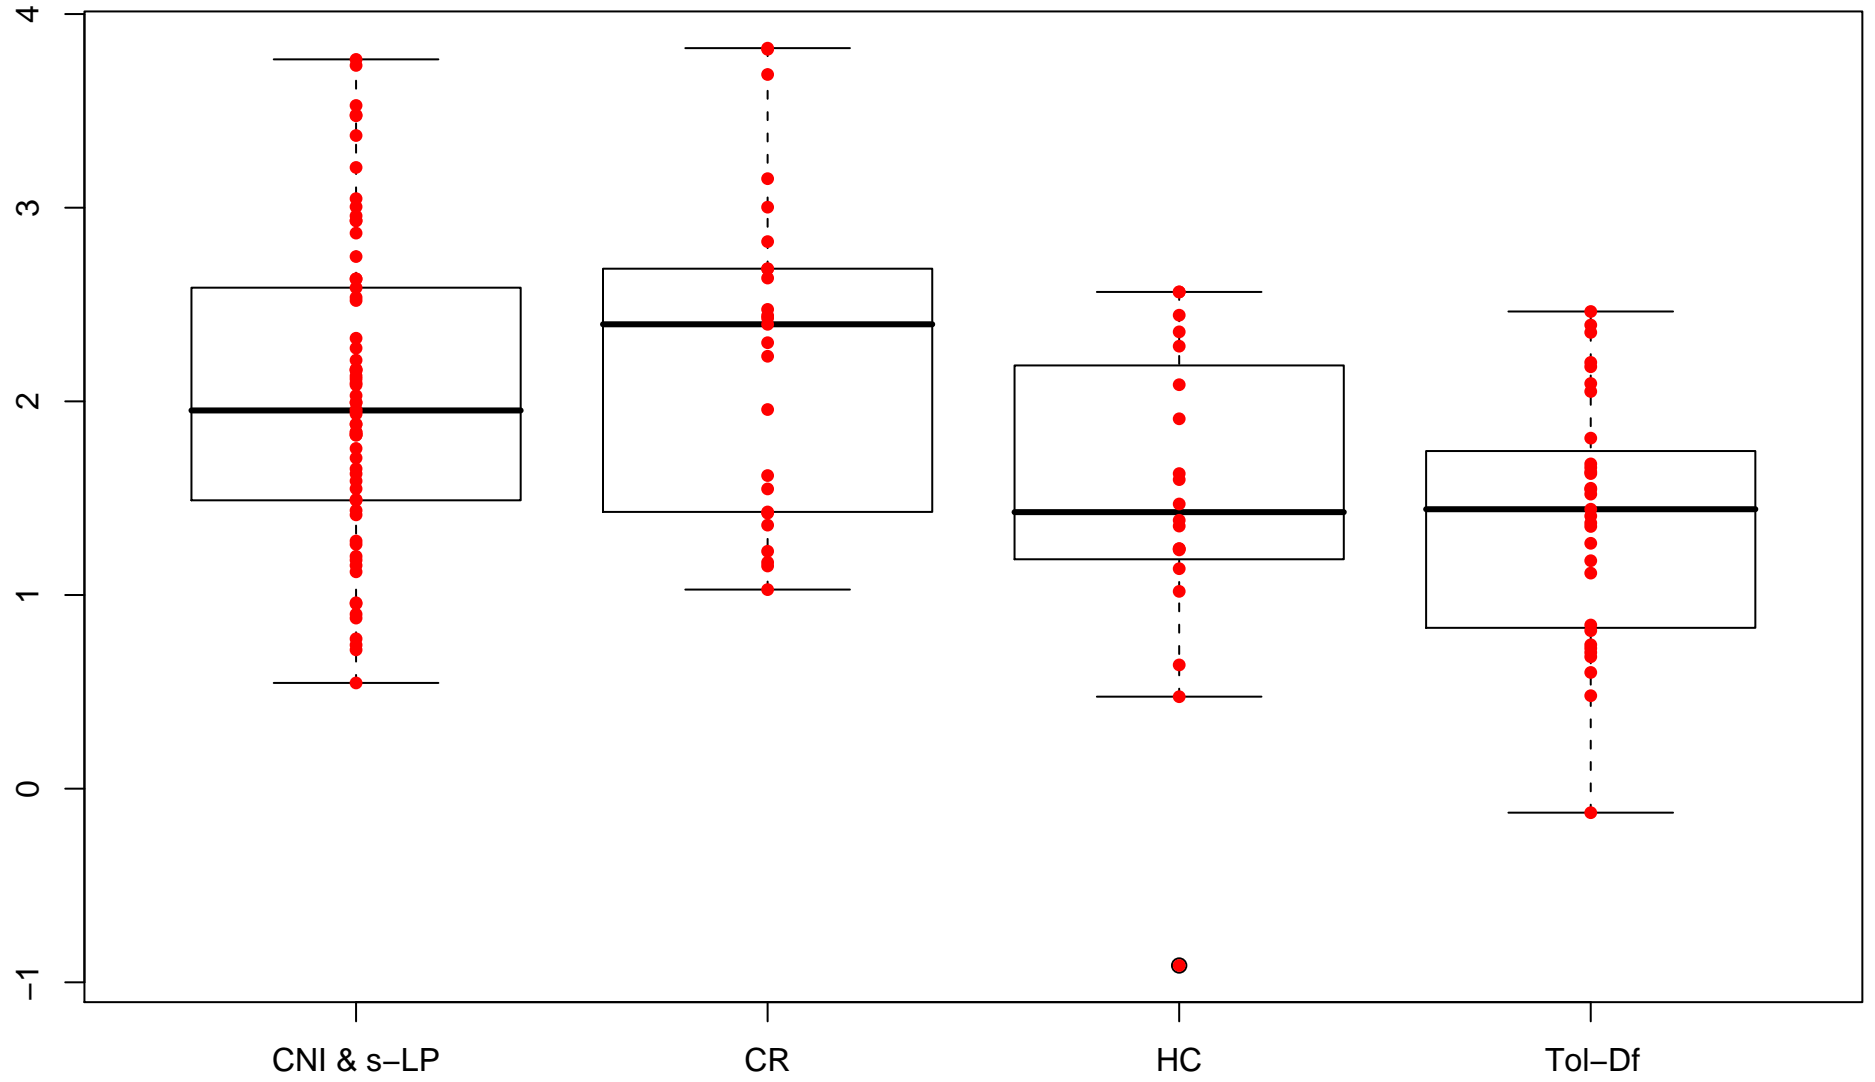

Rank 507 : TM2D1  
0.00024877

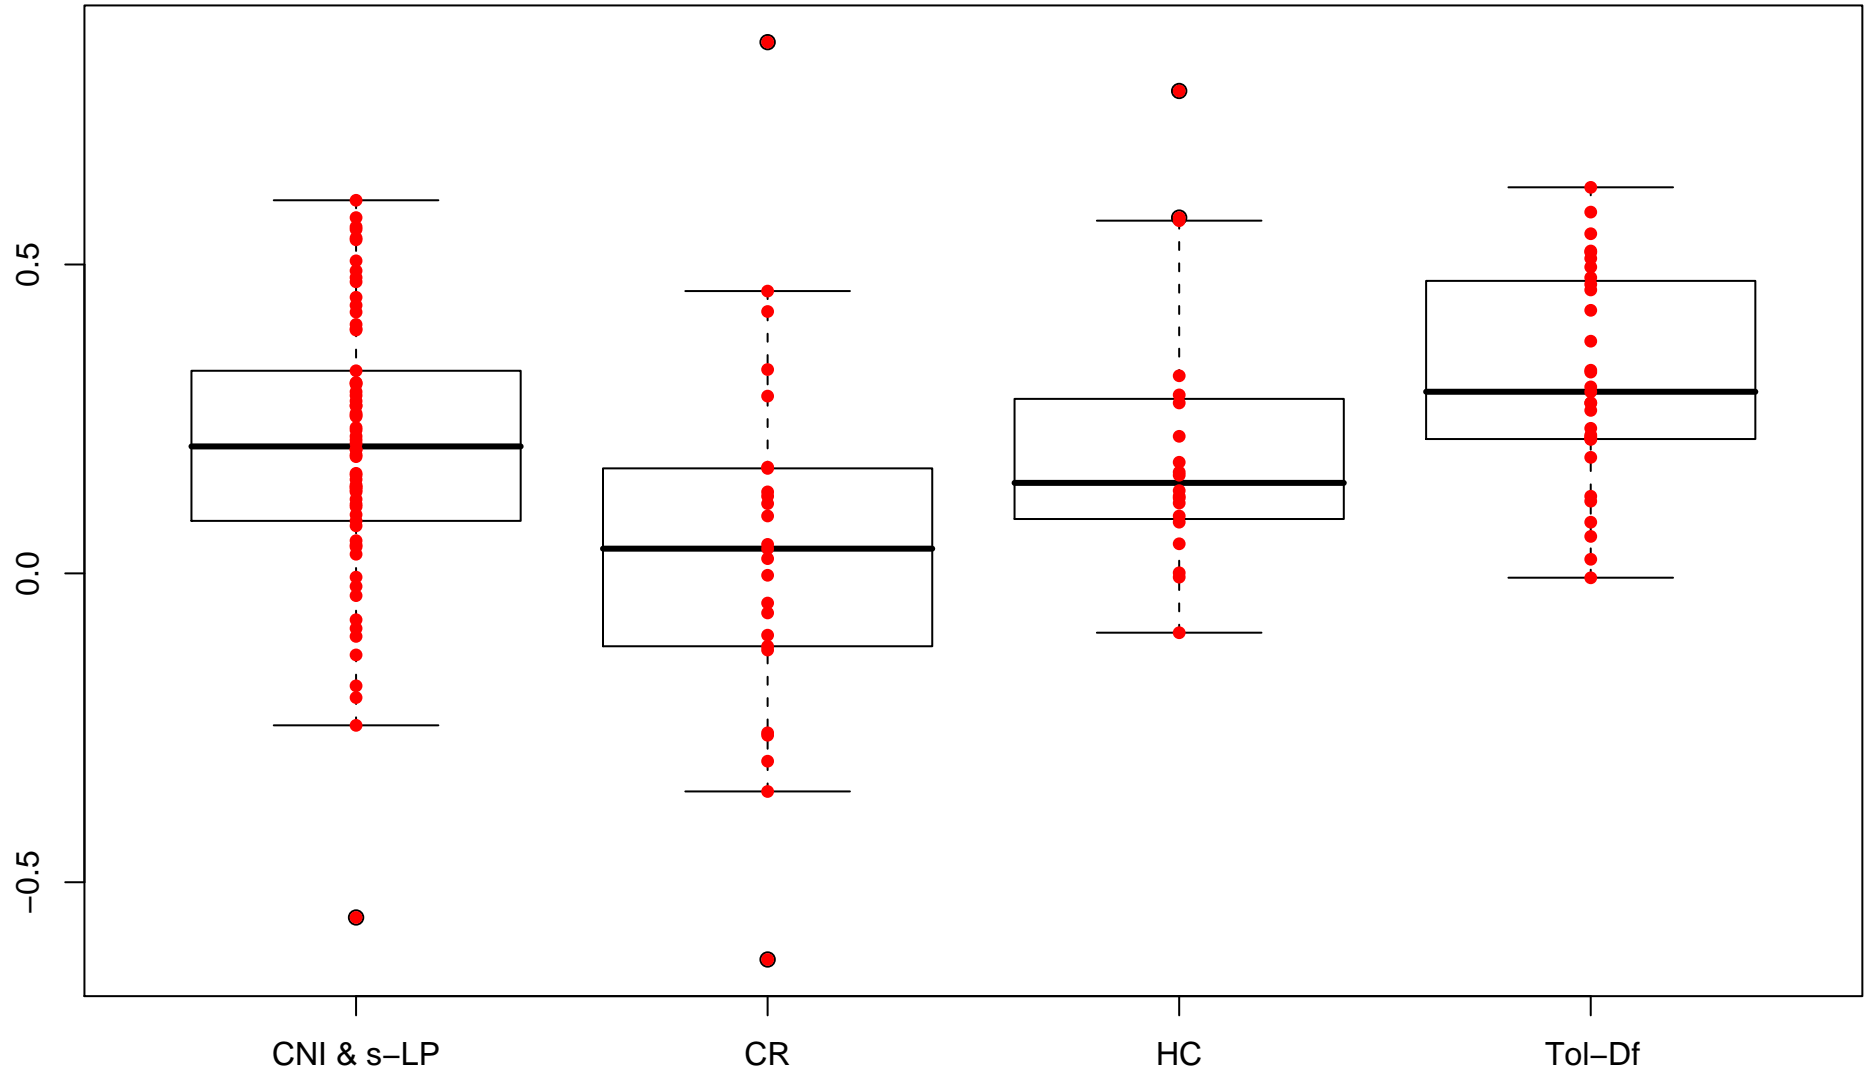

Rank 508 : ATR  
0.00025017

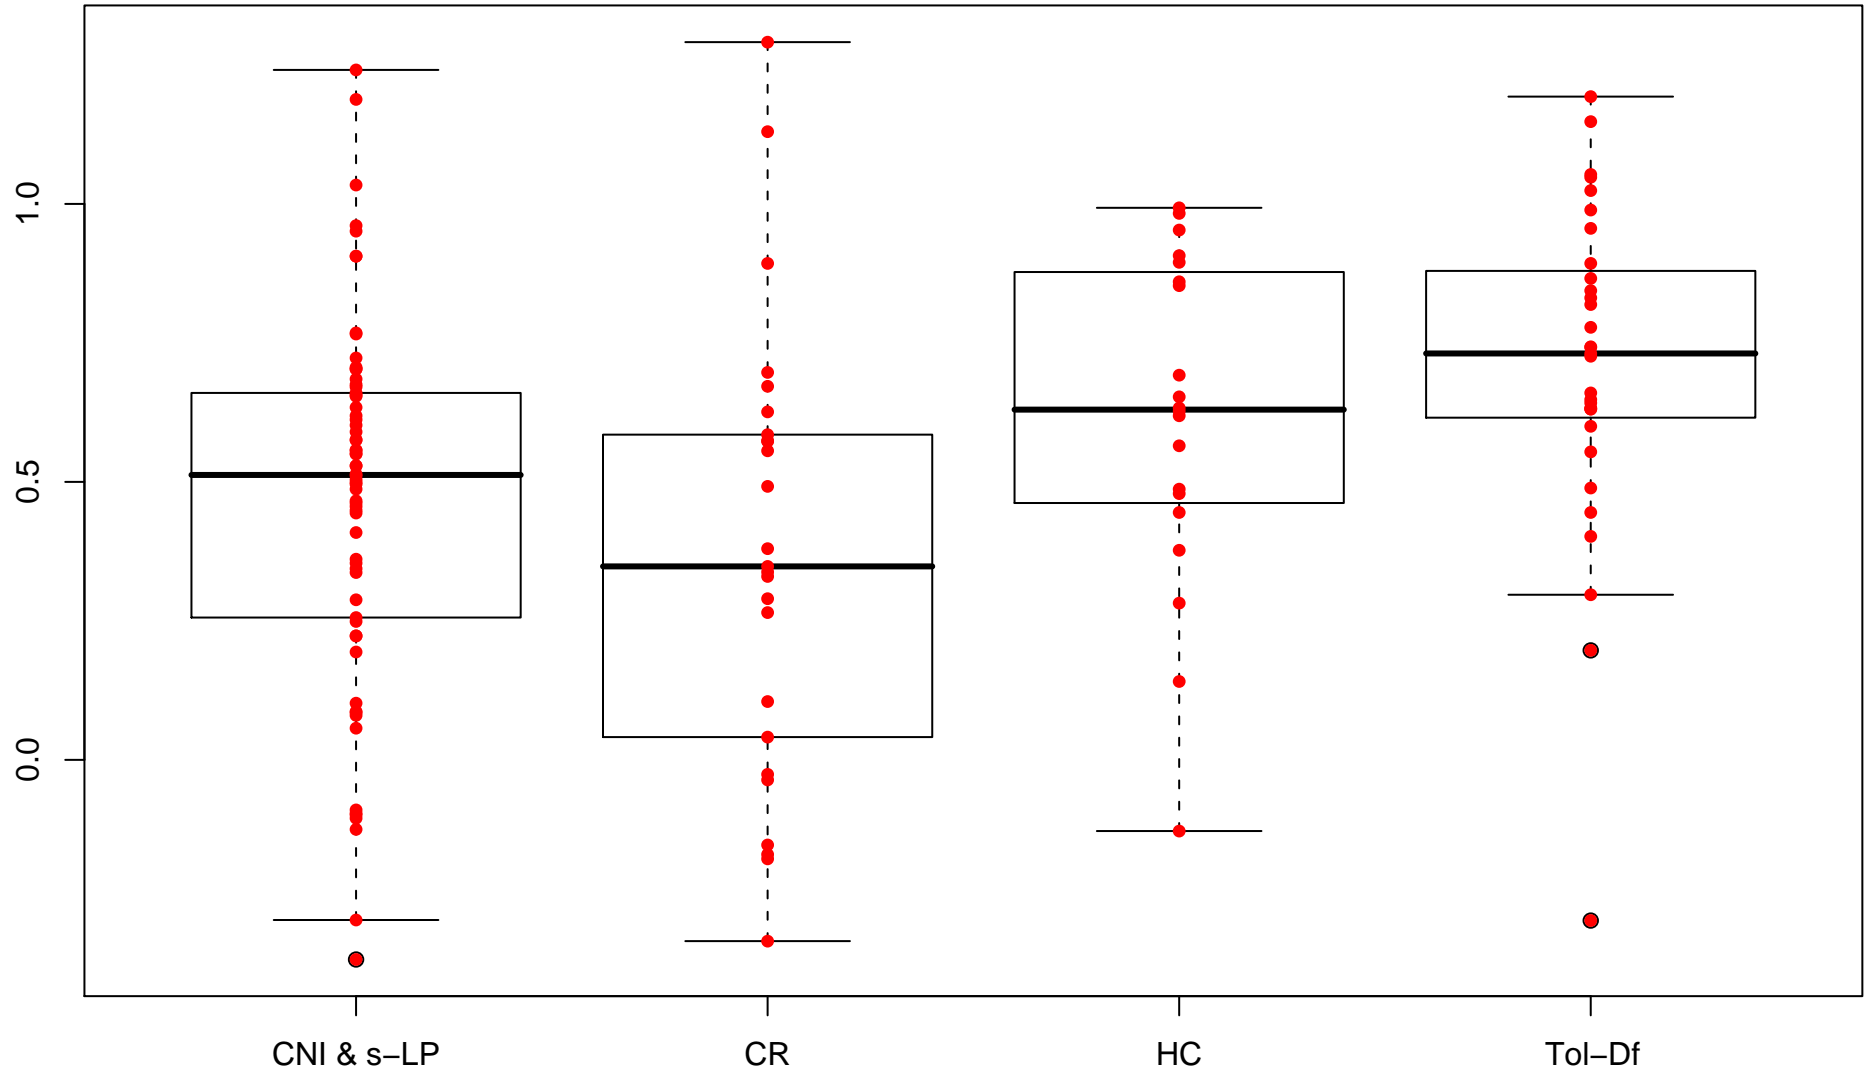

Rank 509 : VCPIP1  
0.0002505

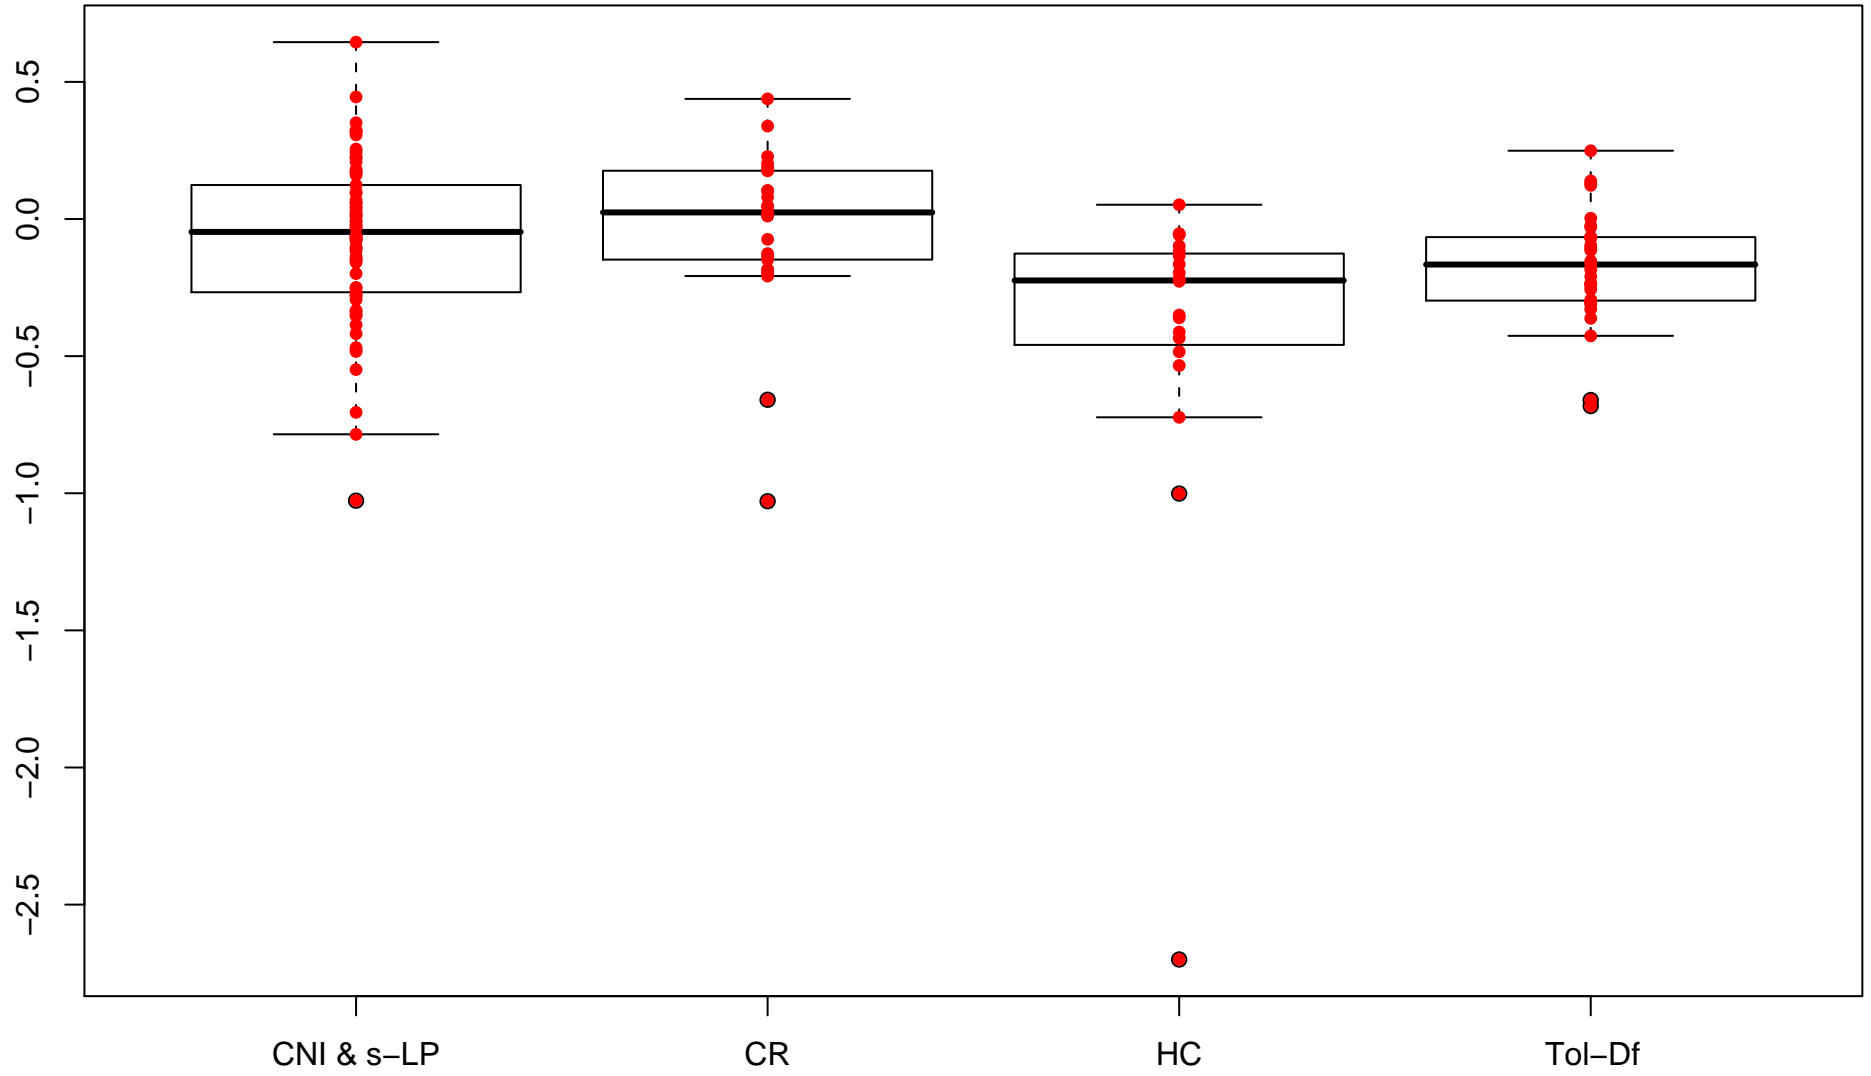

Rank 510 : WDR45L  
0.00025145

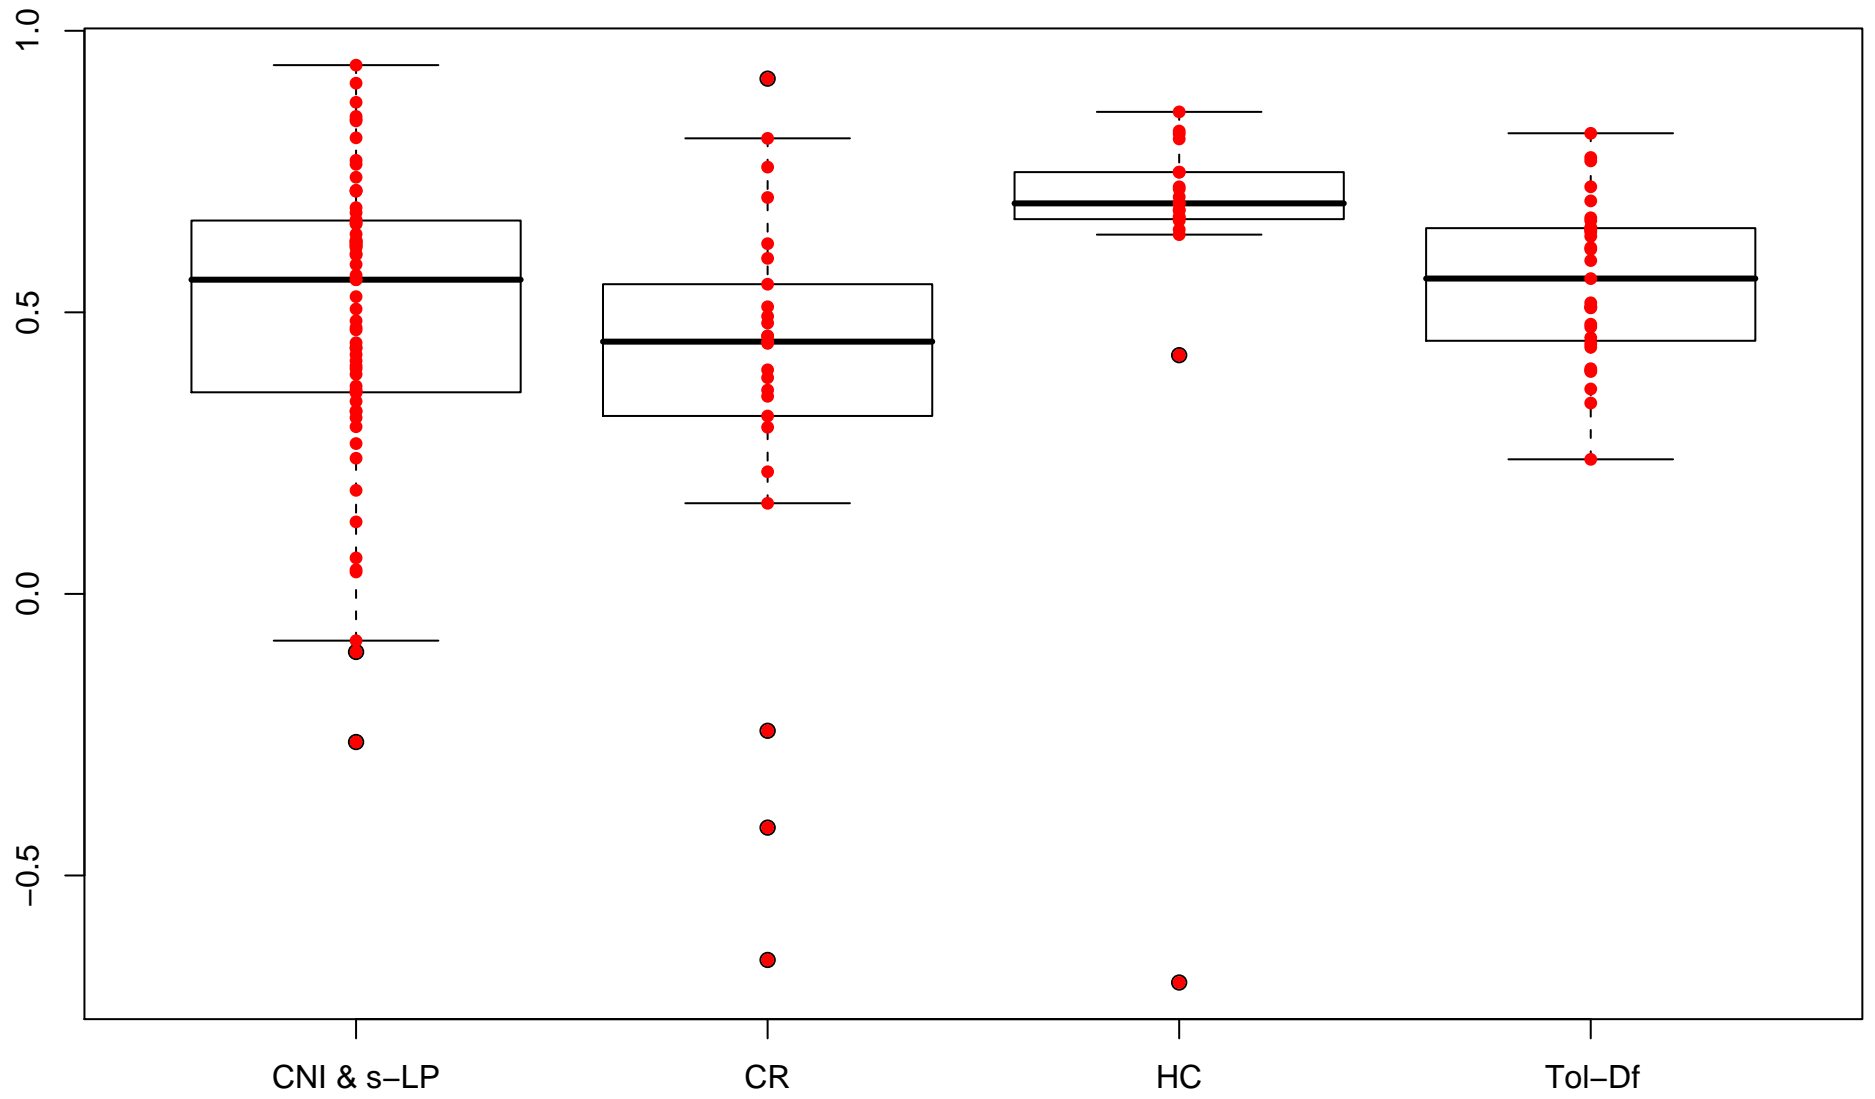

Rank 511 : ATG5  
0.00025326

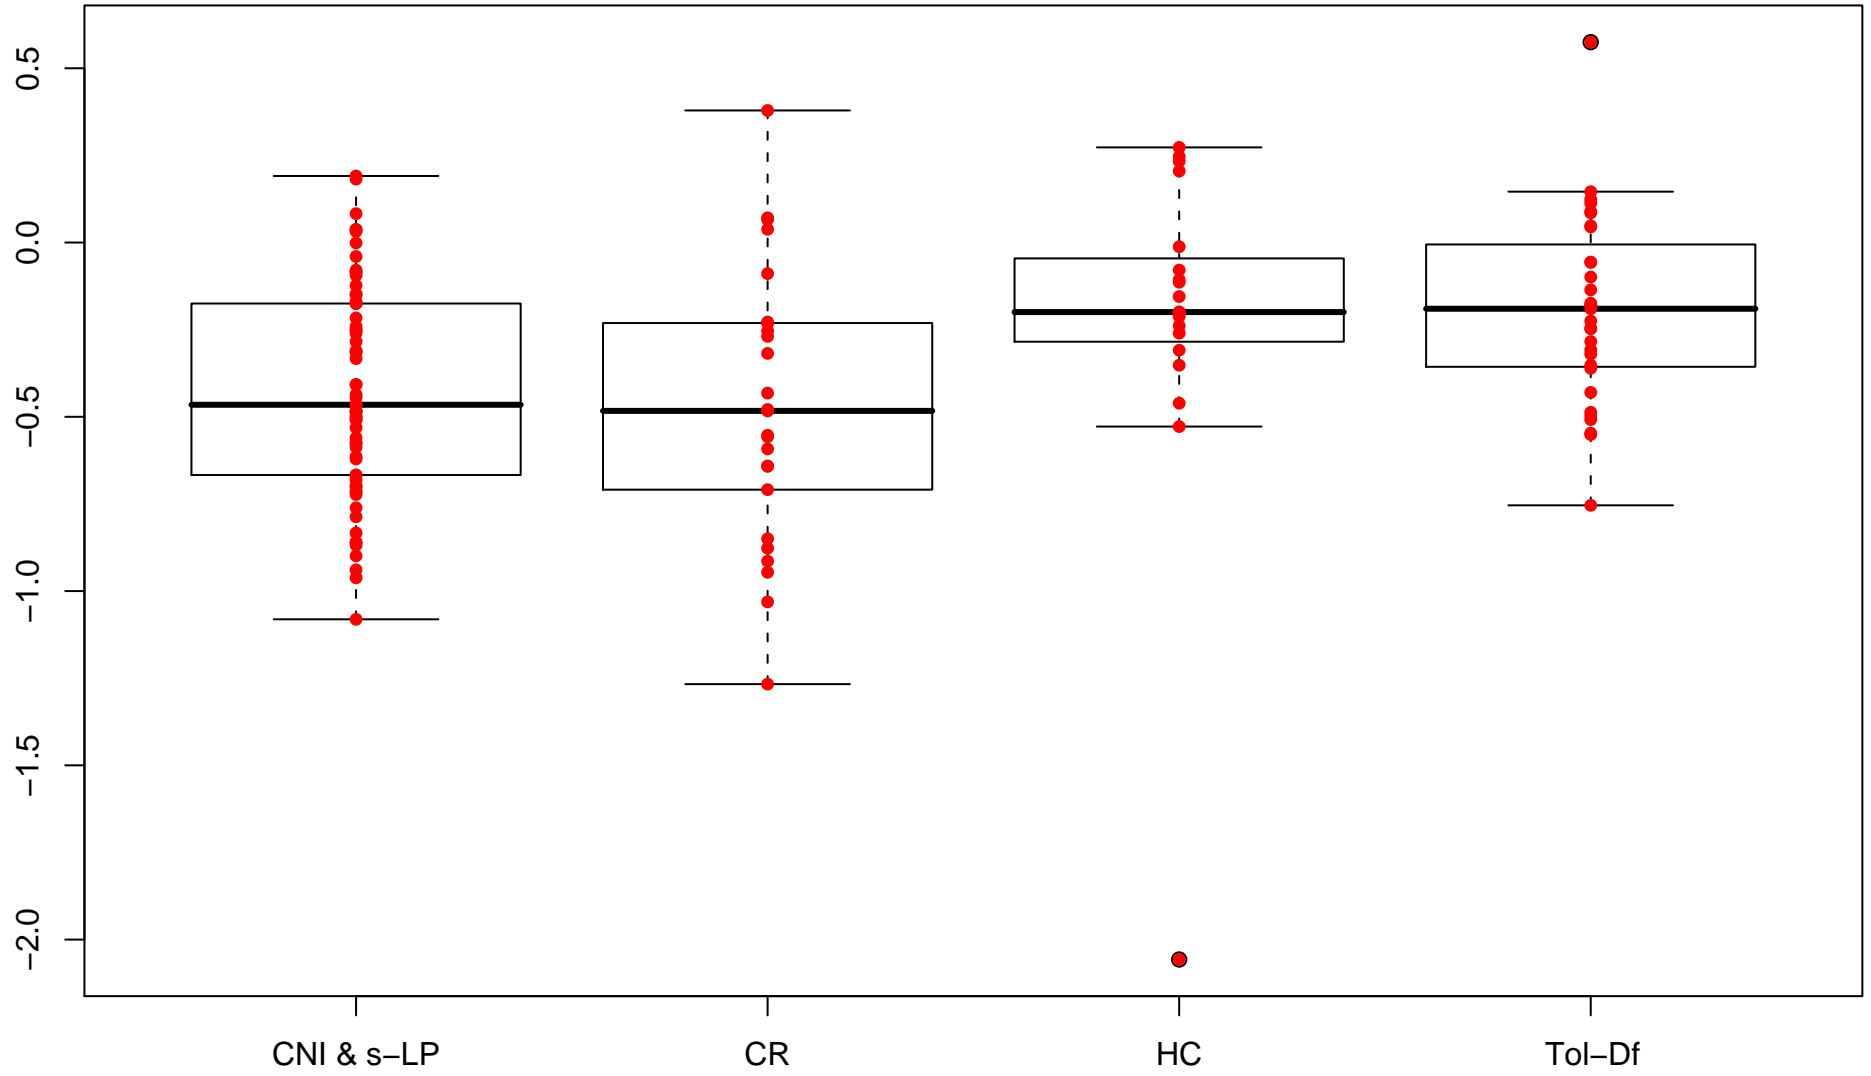



Rank 512 : NUCKS1  
0.00025341

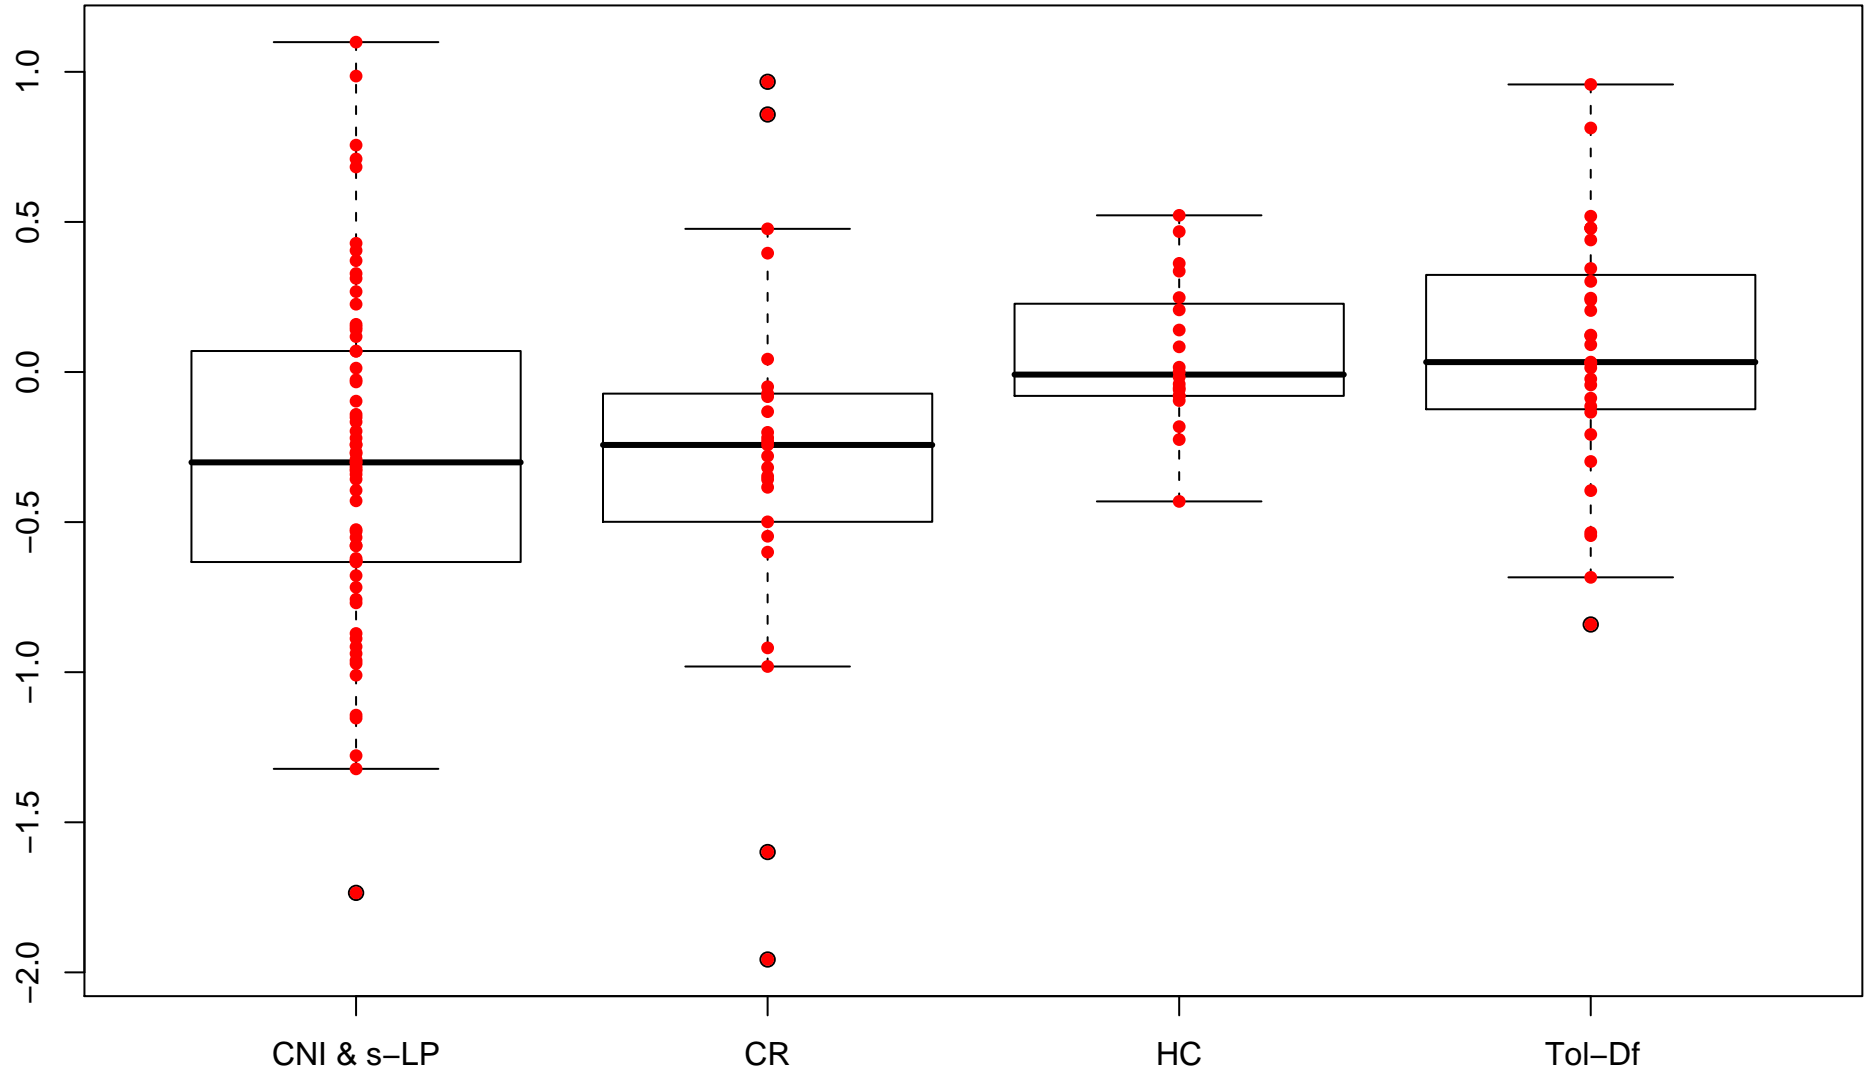

Rank 513 : LTB4R  
0.00025351

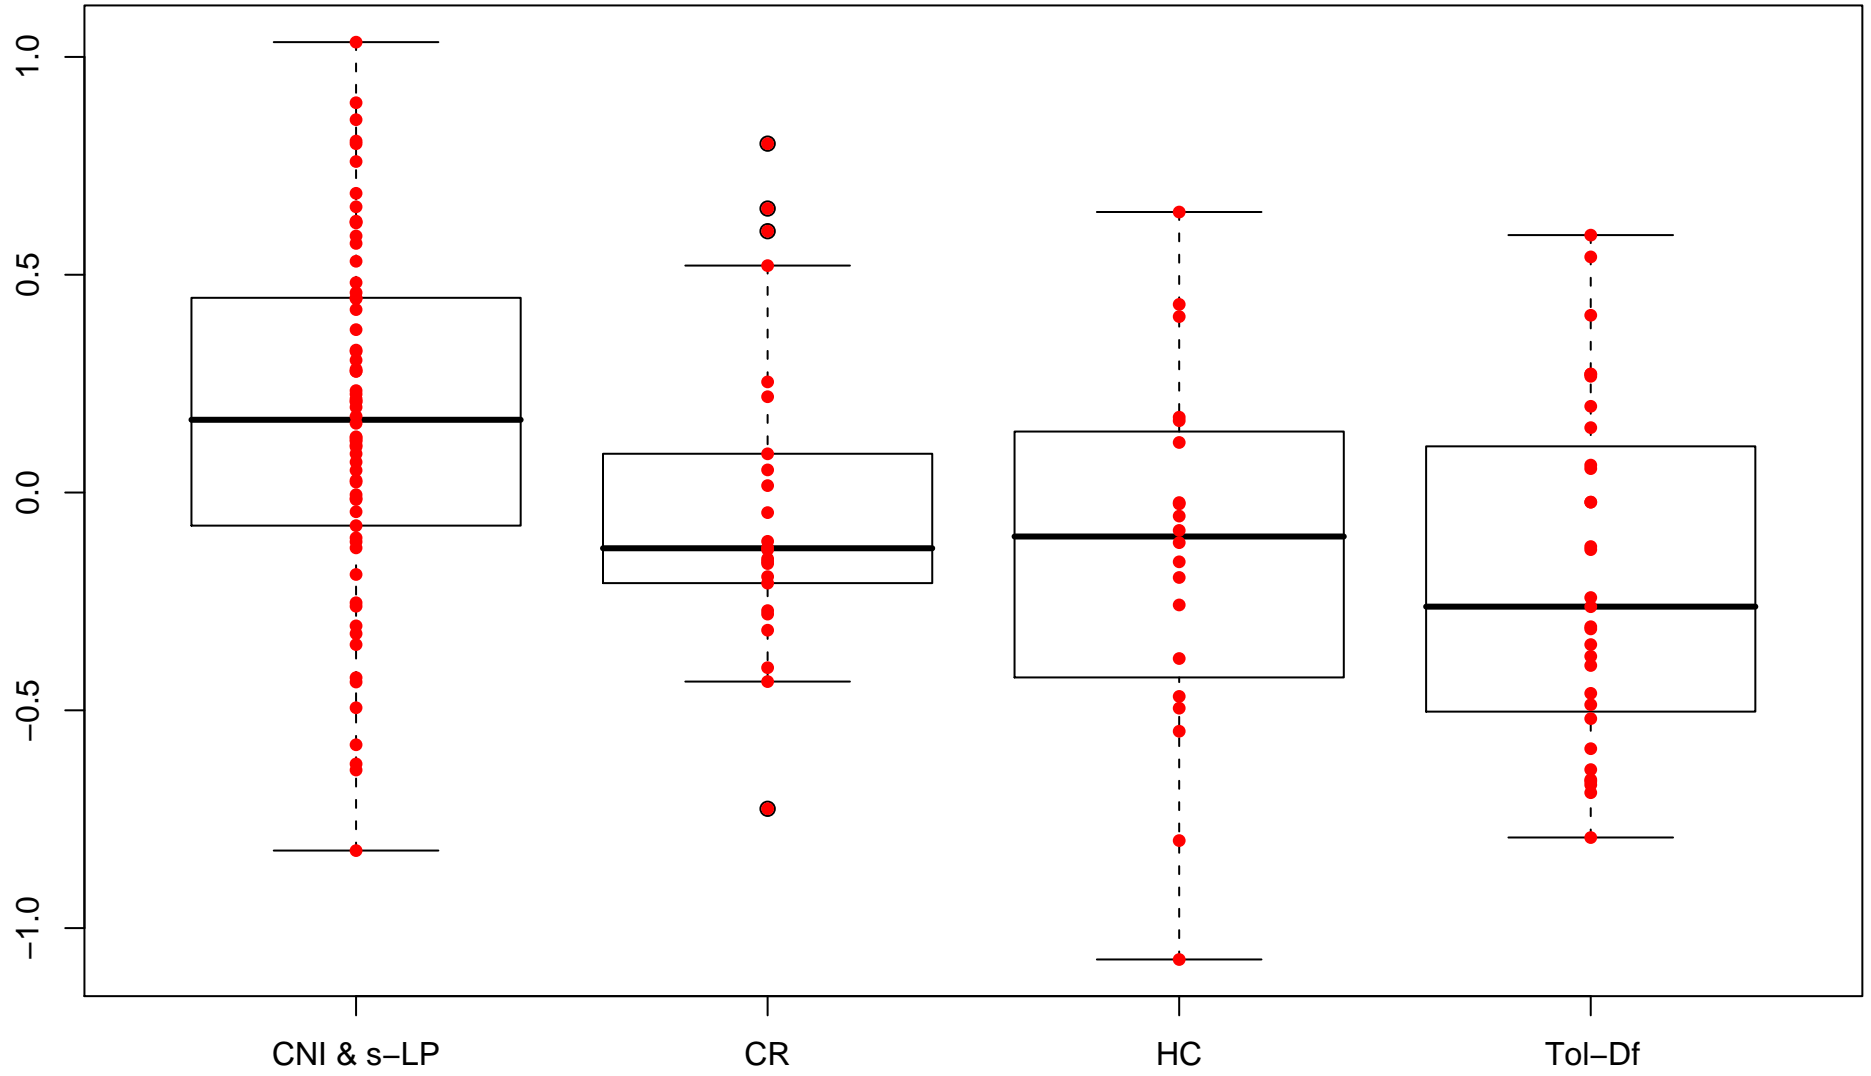

Rank 514 : POLR1D  
0.00025474

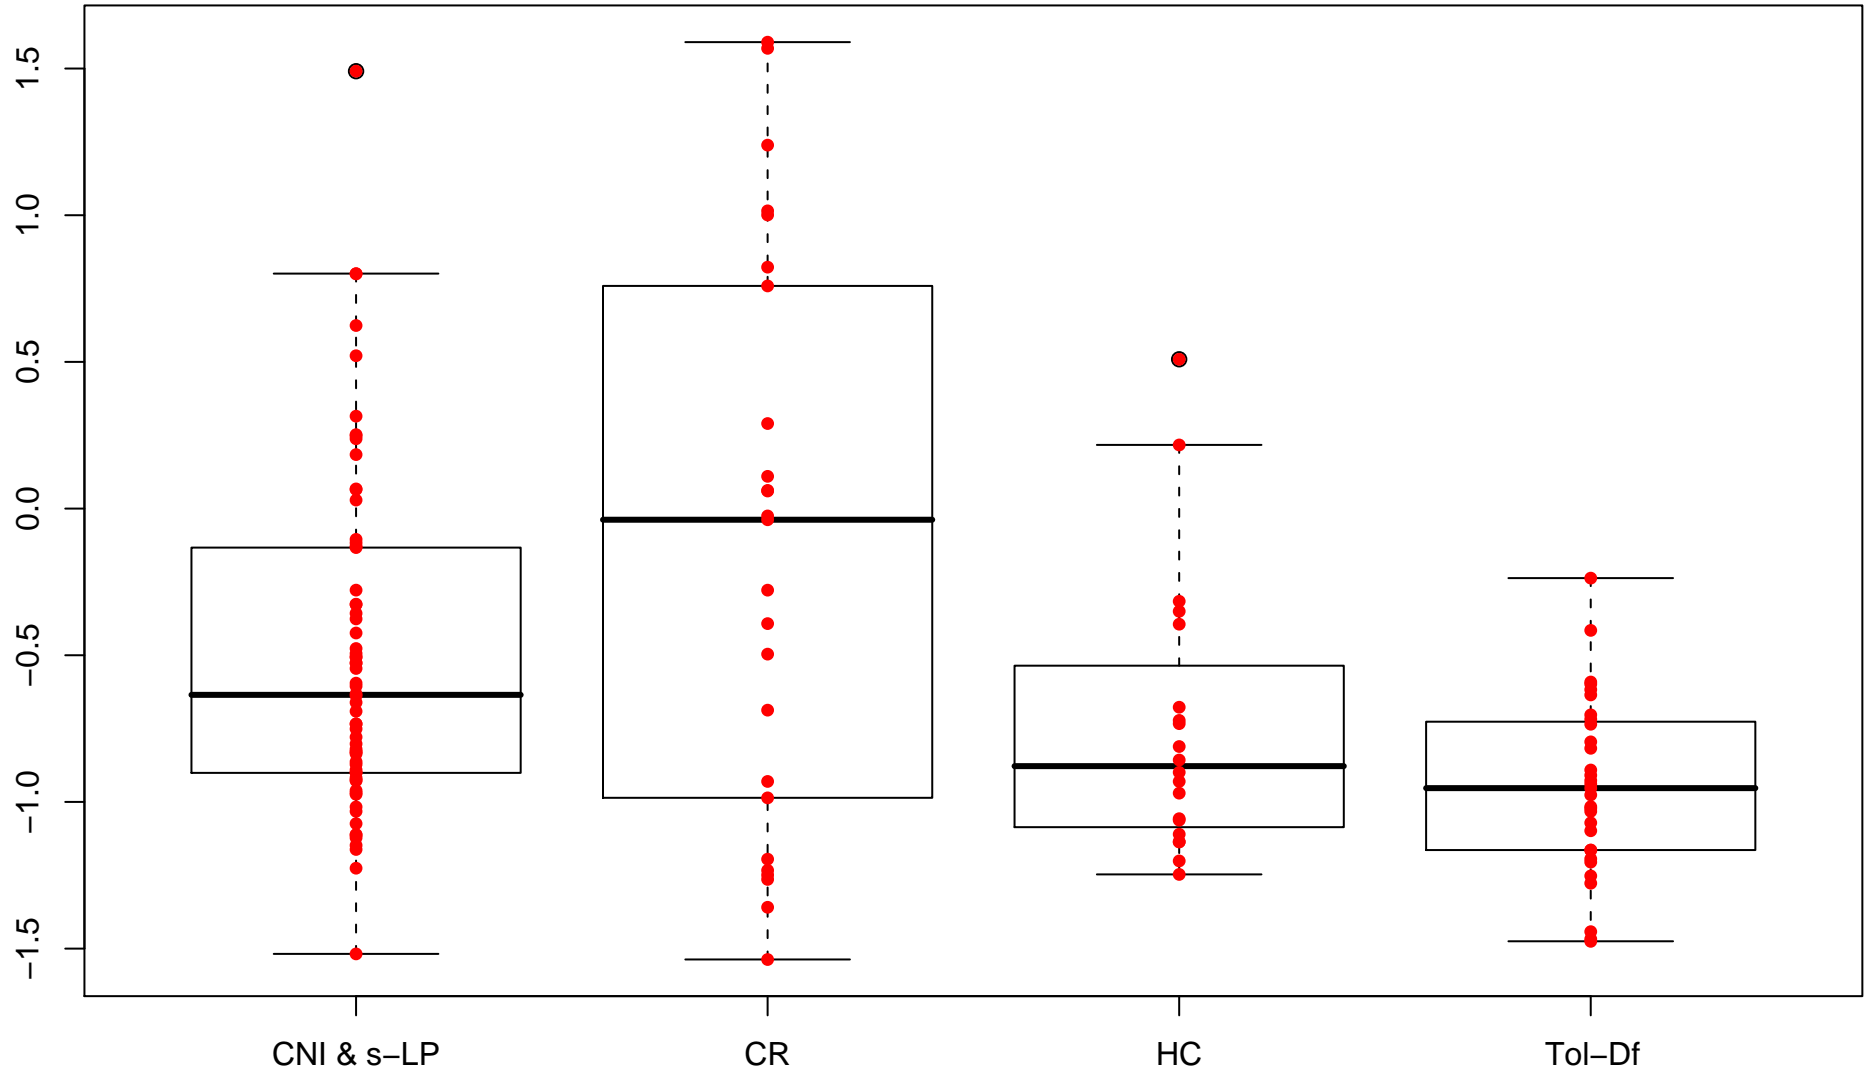

Rank 515 : PIGK  
0.00026058

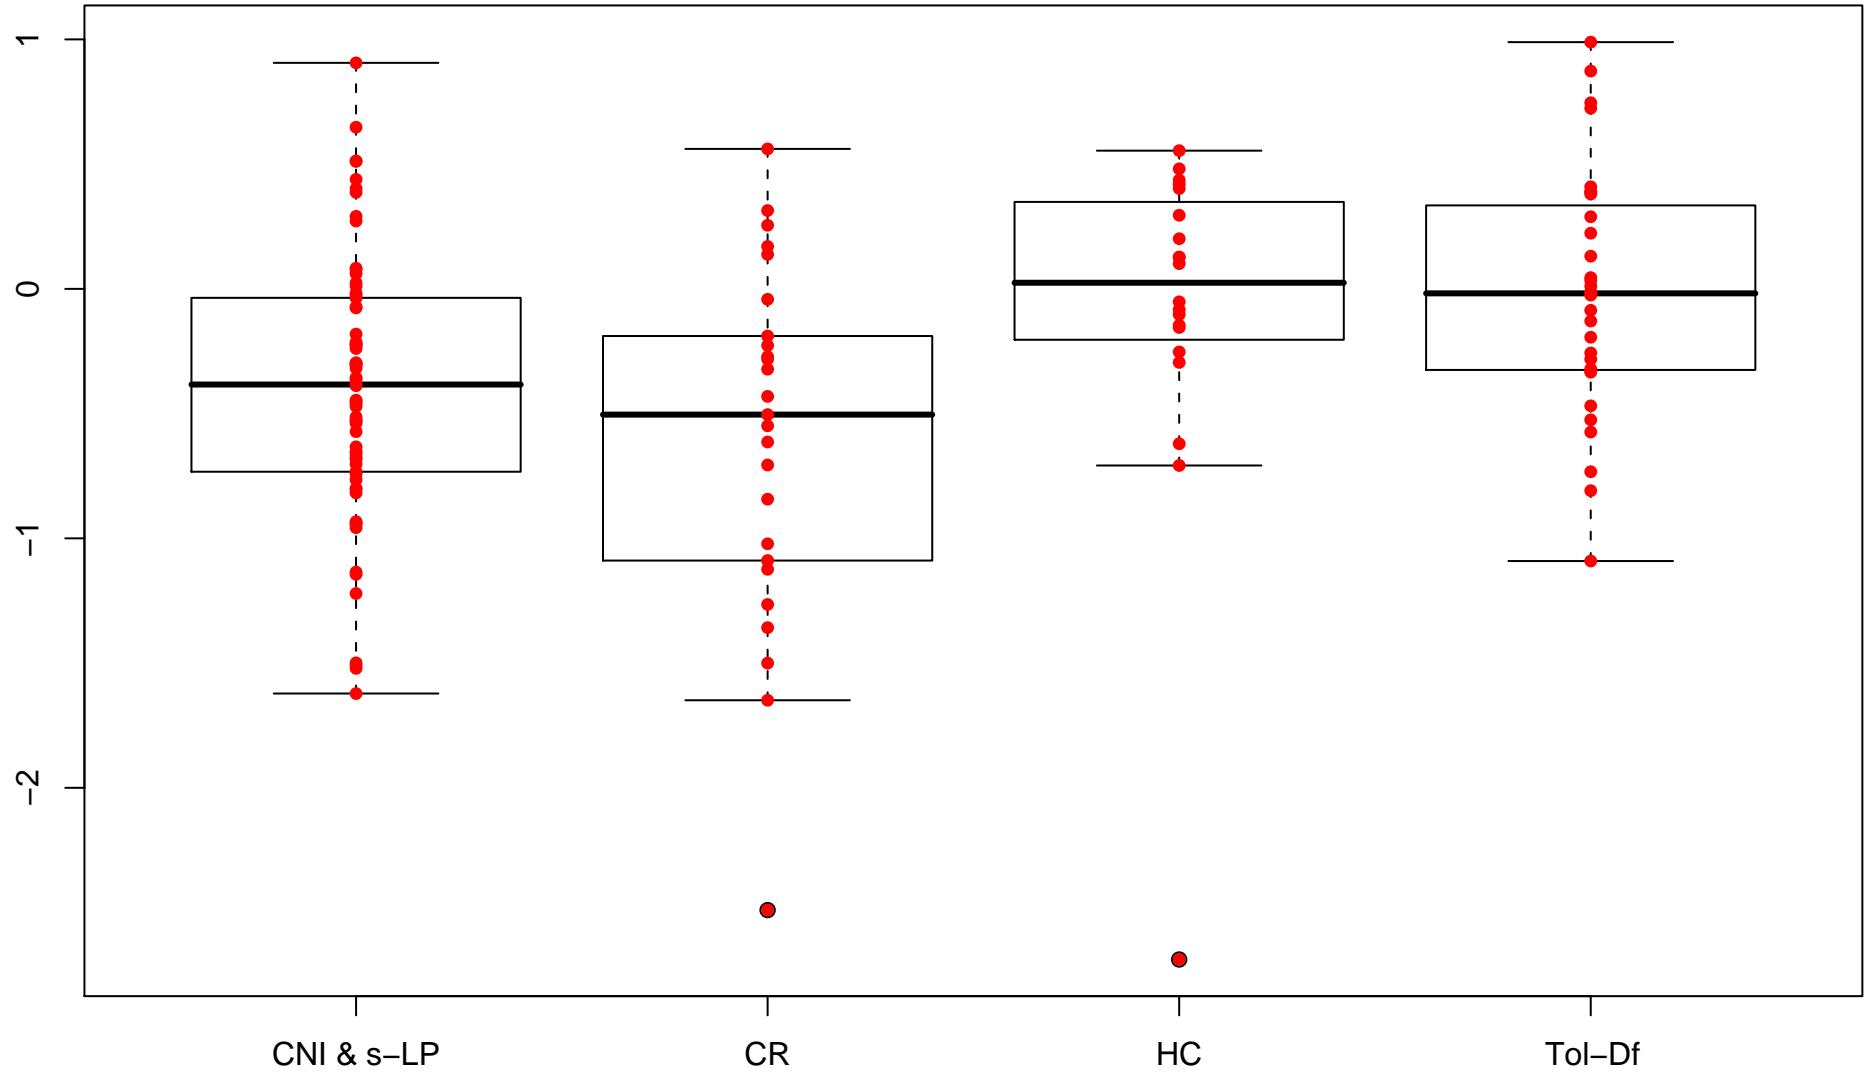

Rank 516 : SIP1  
0.00026431

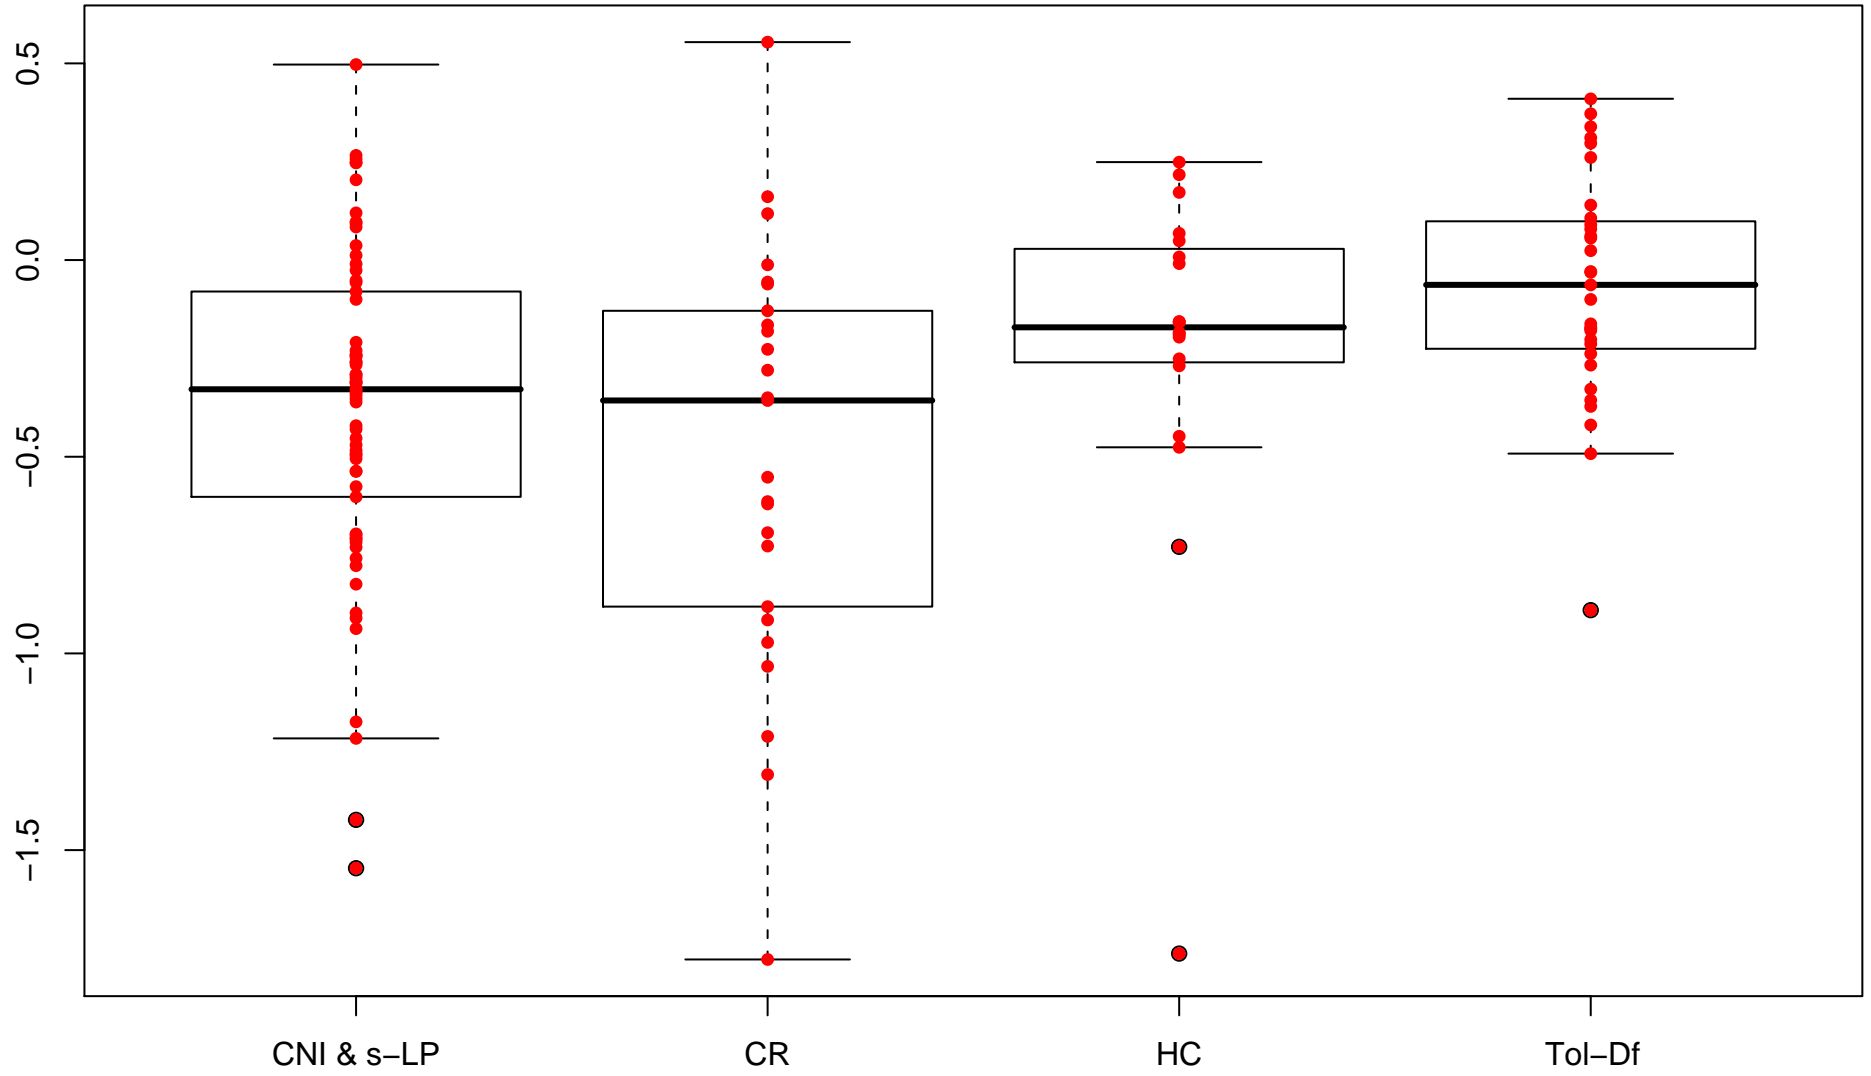

Rank 517 : PRICKLE1  
0.00026598

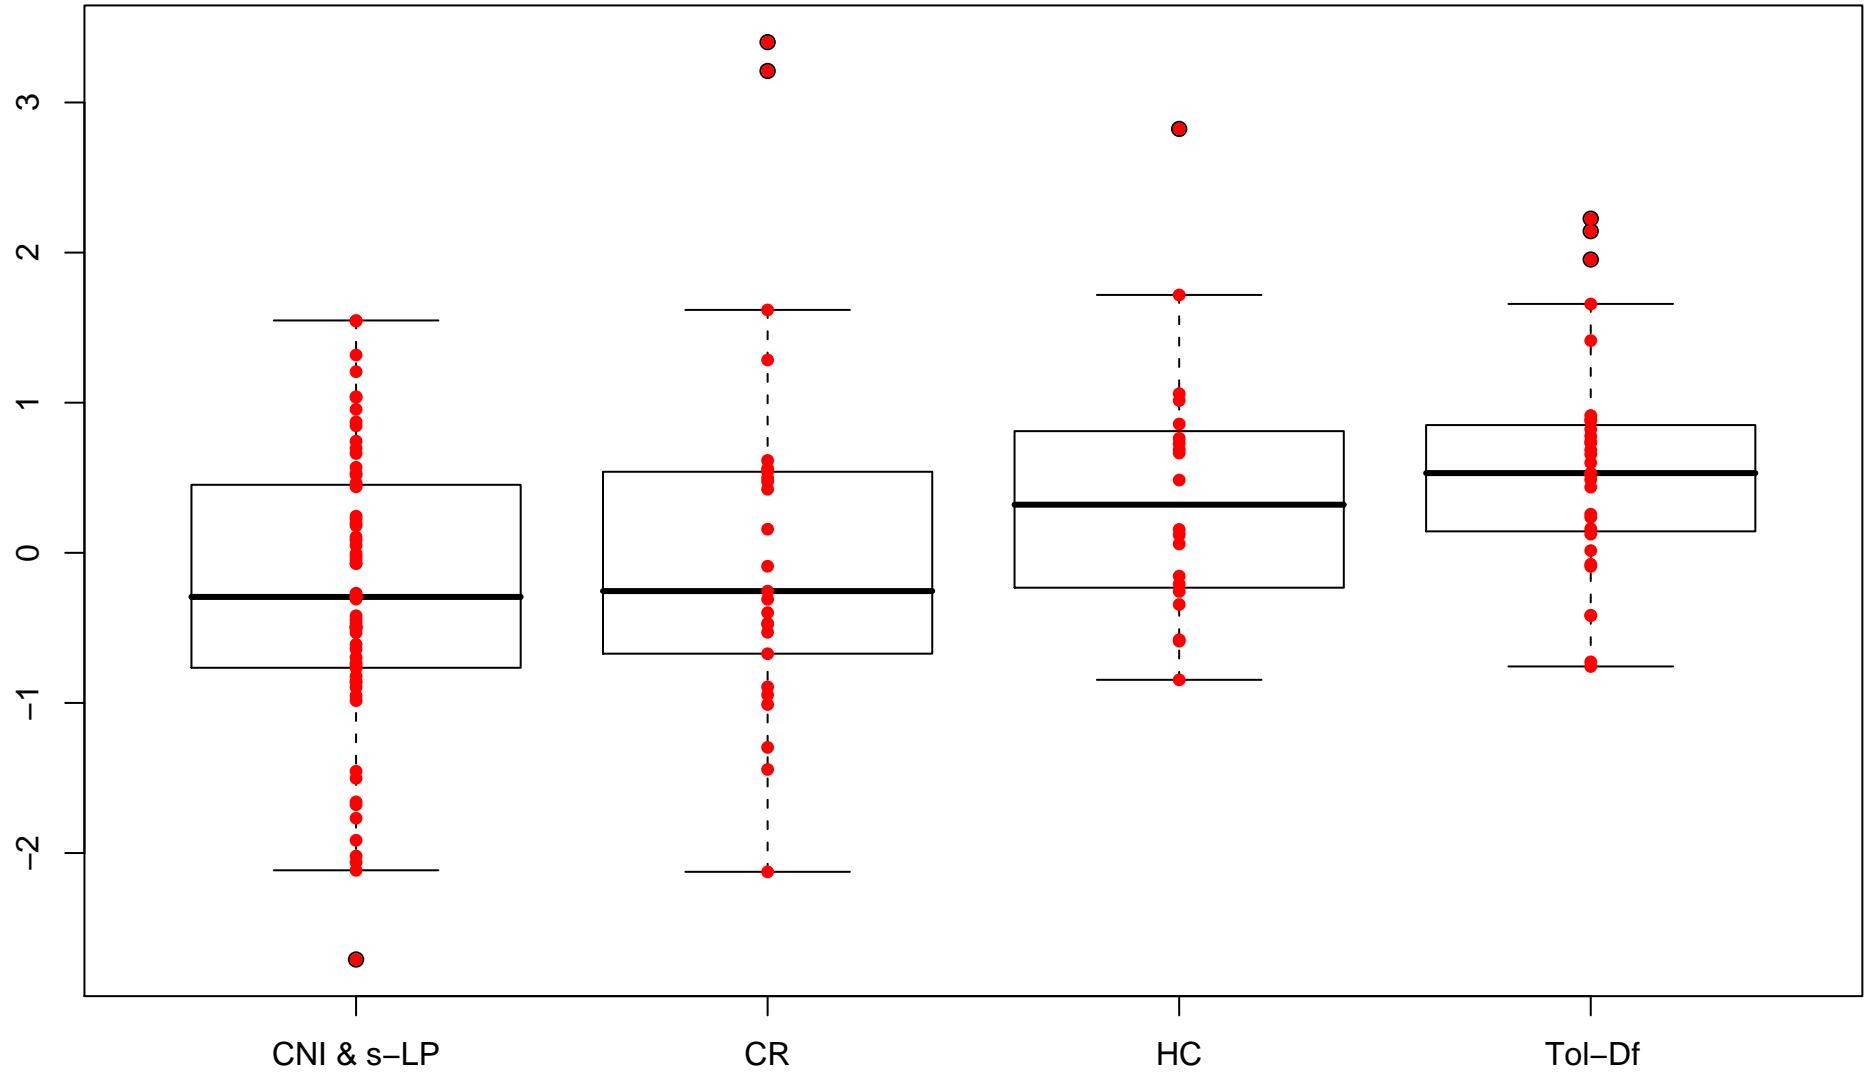

Rank 518 : ARHGEF9  
0.00026806

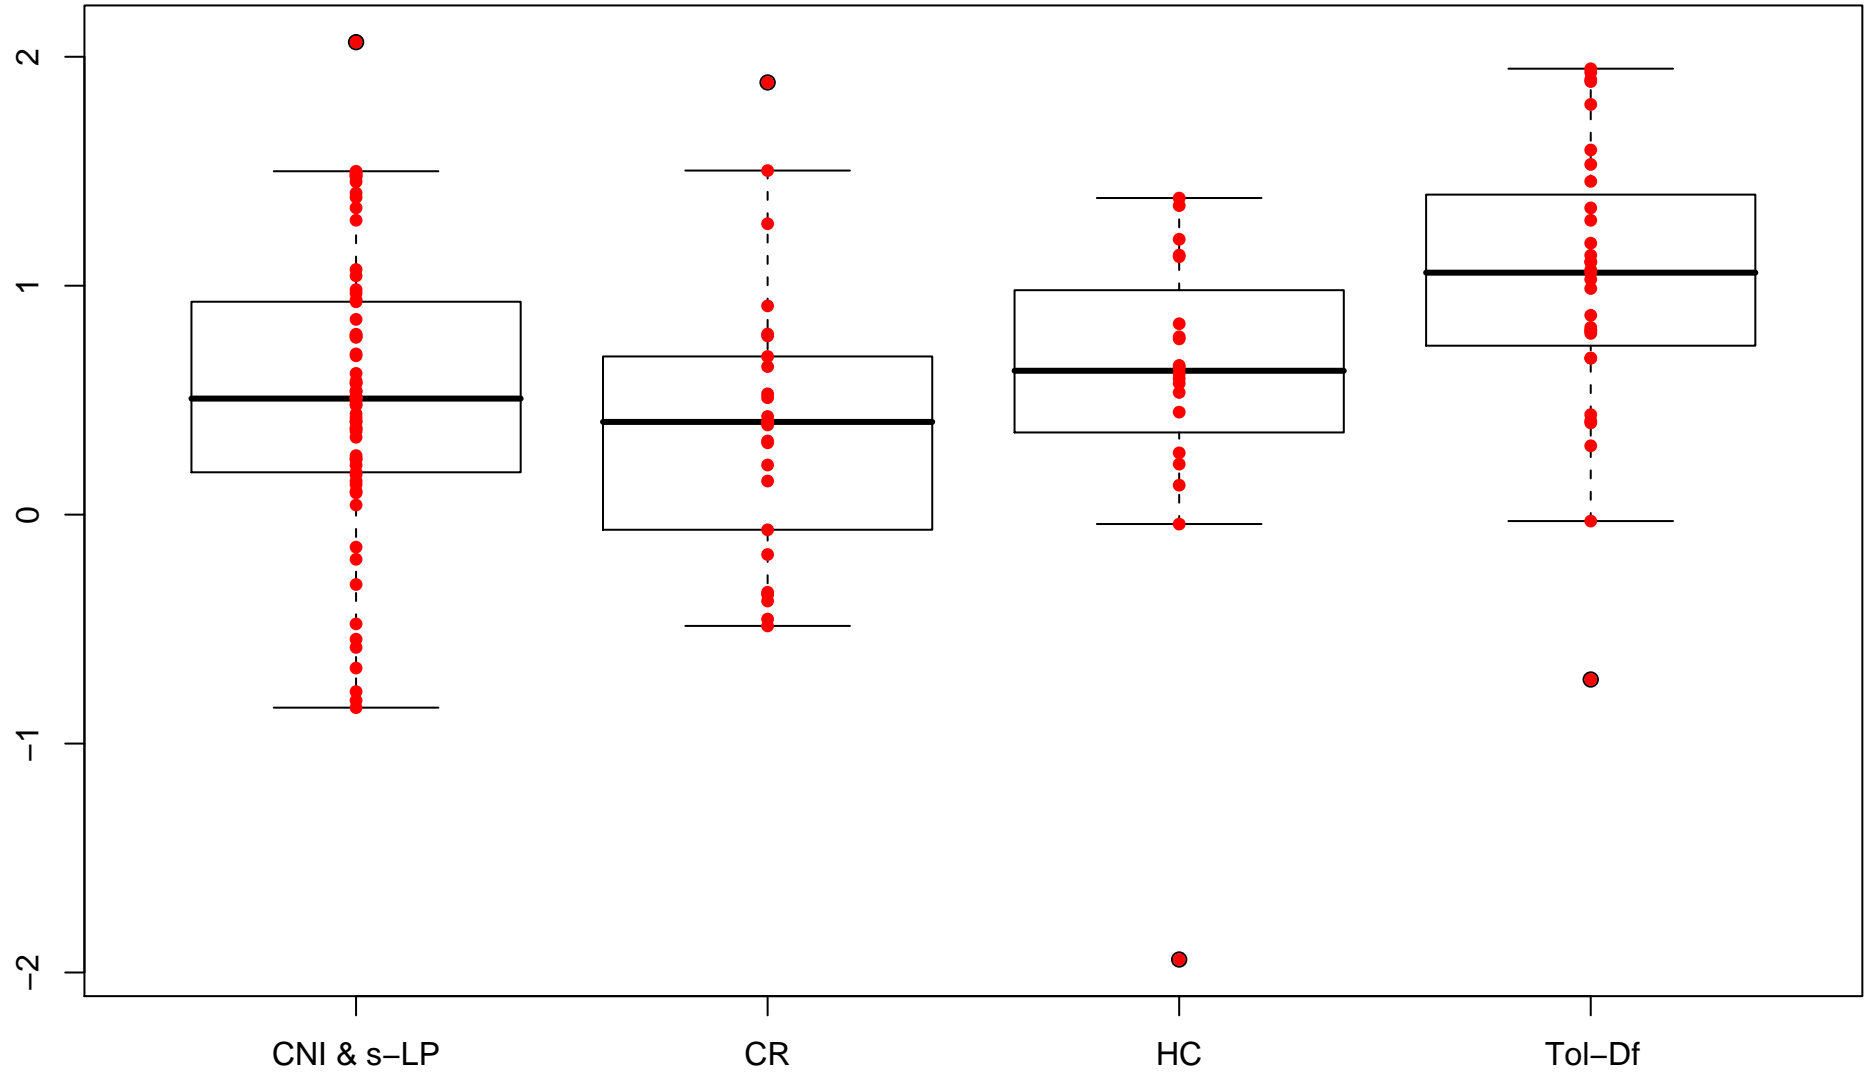

Rank 519 : MGC29891  
0.0002685

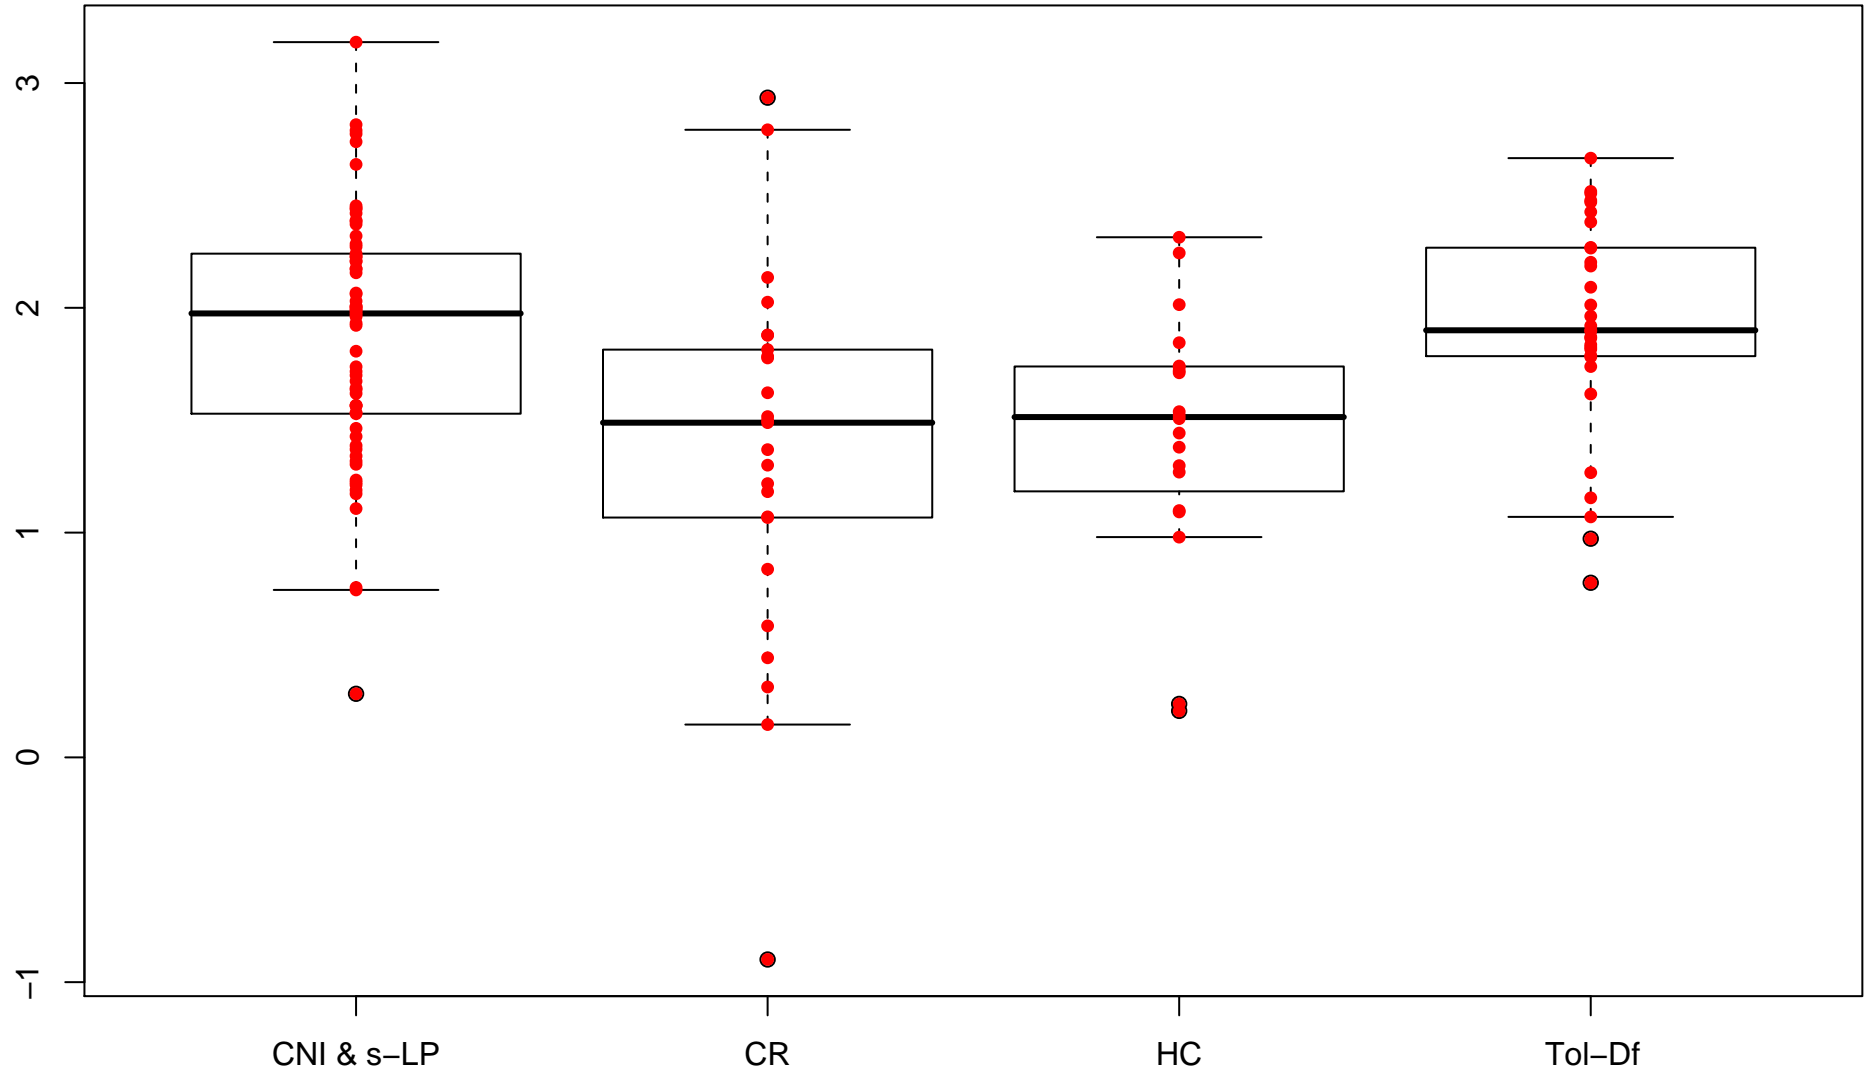



Rank 520 : AQP1  
0.00026879

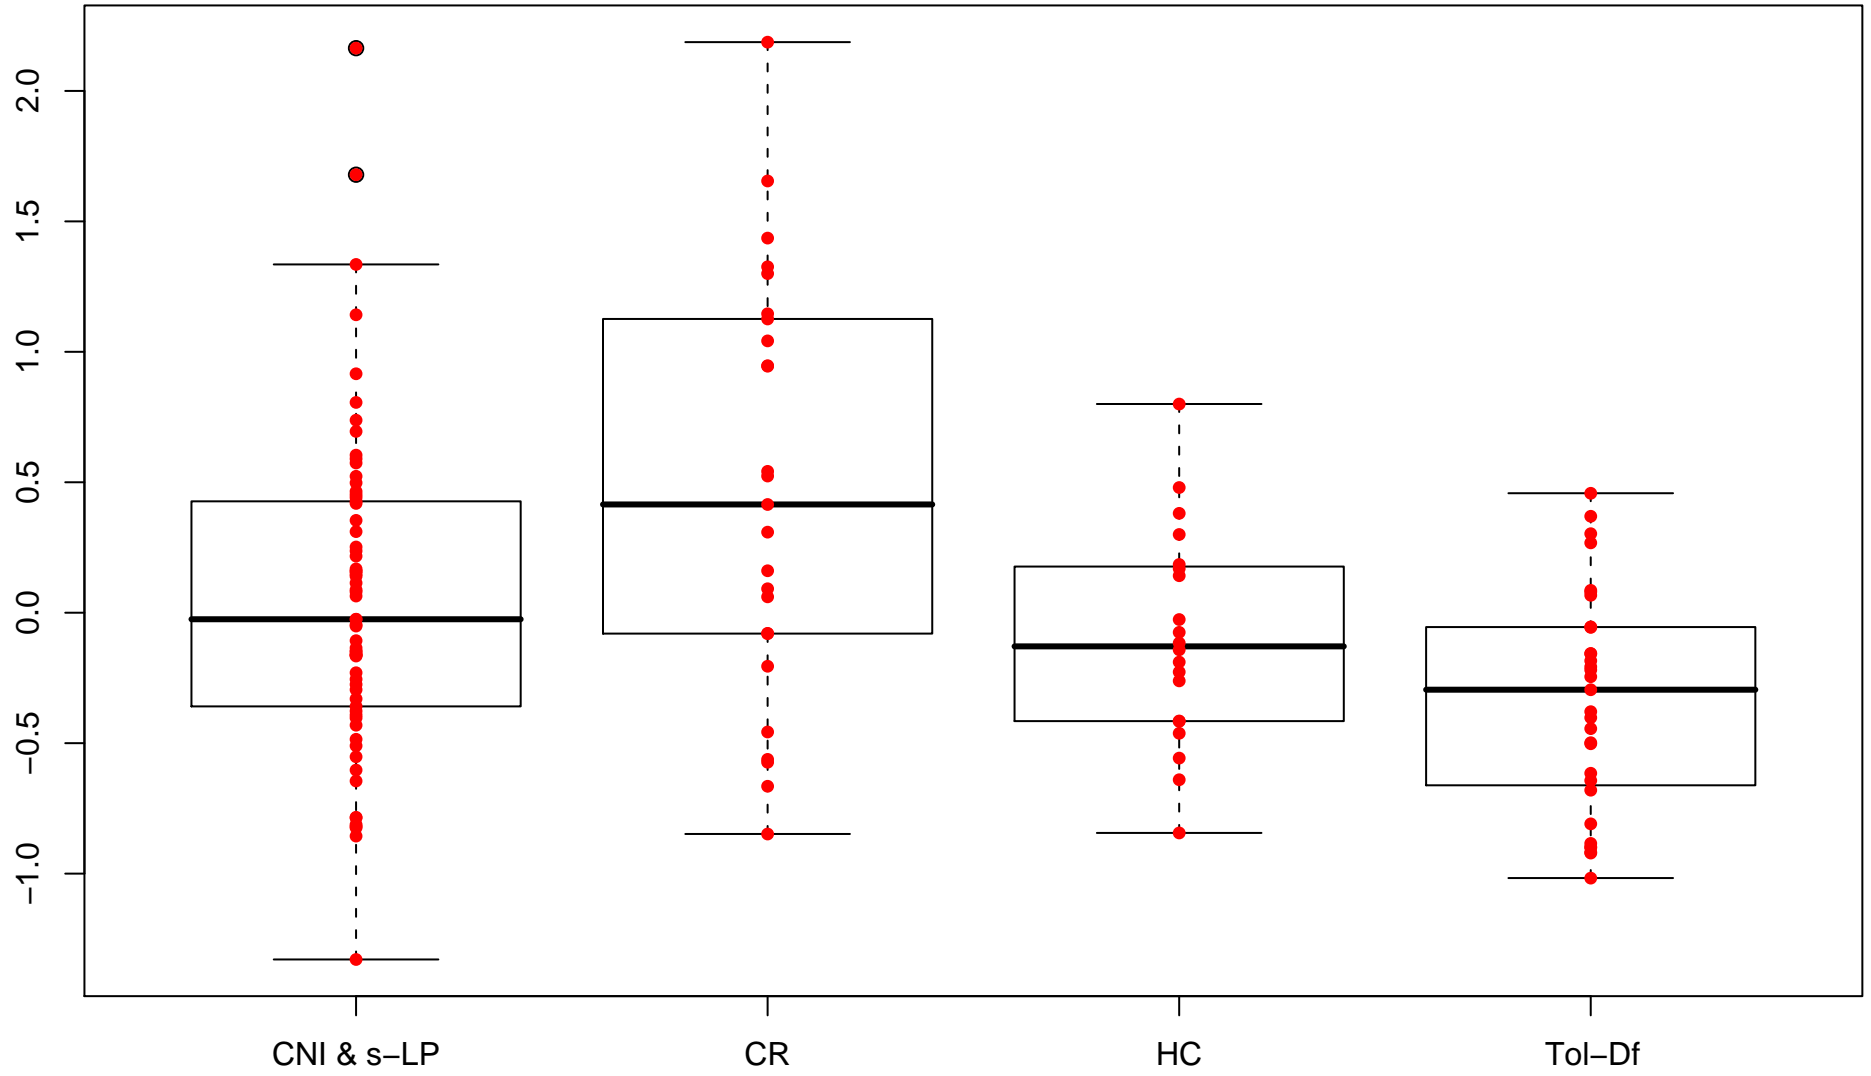

Rank 521 : CCDC90B  
0.00027047

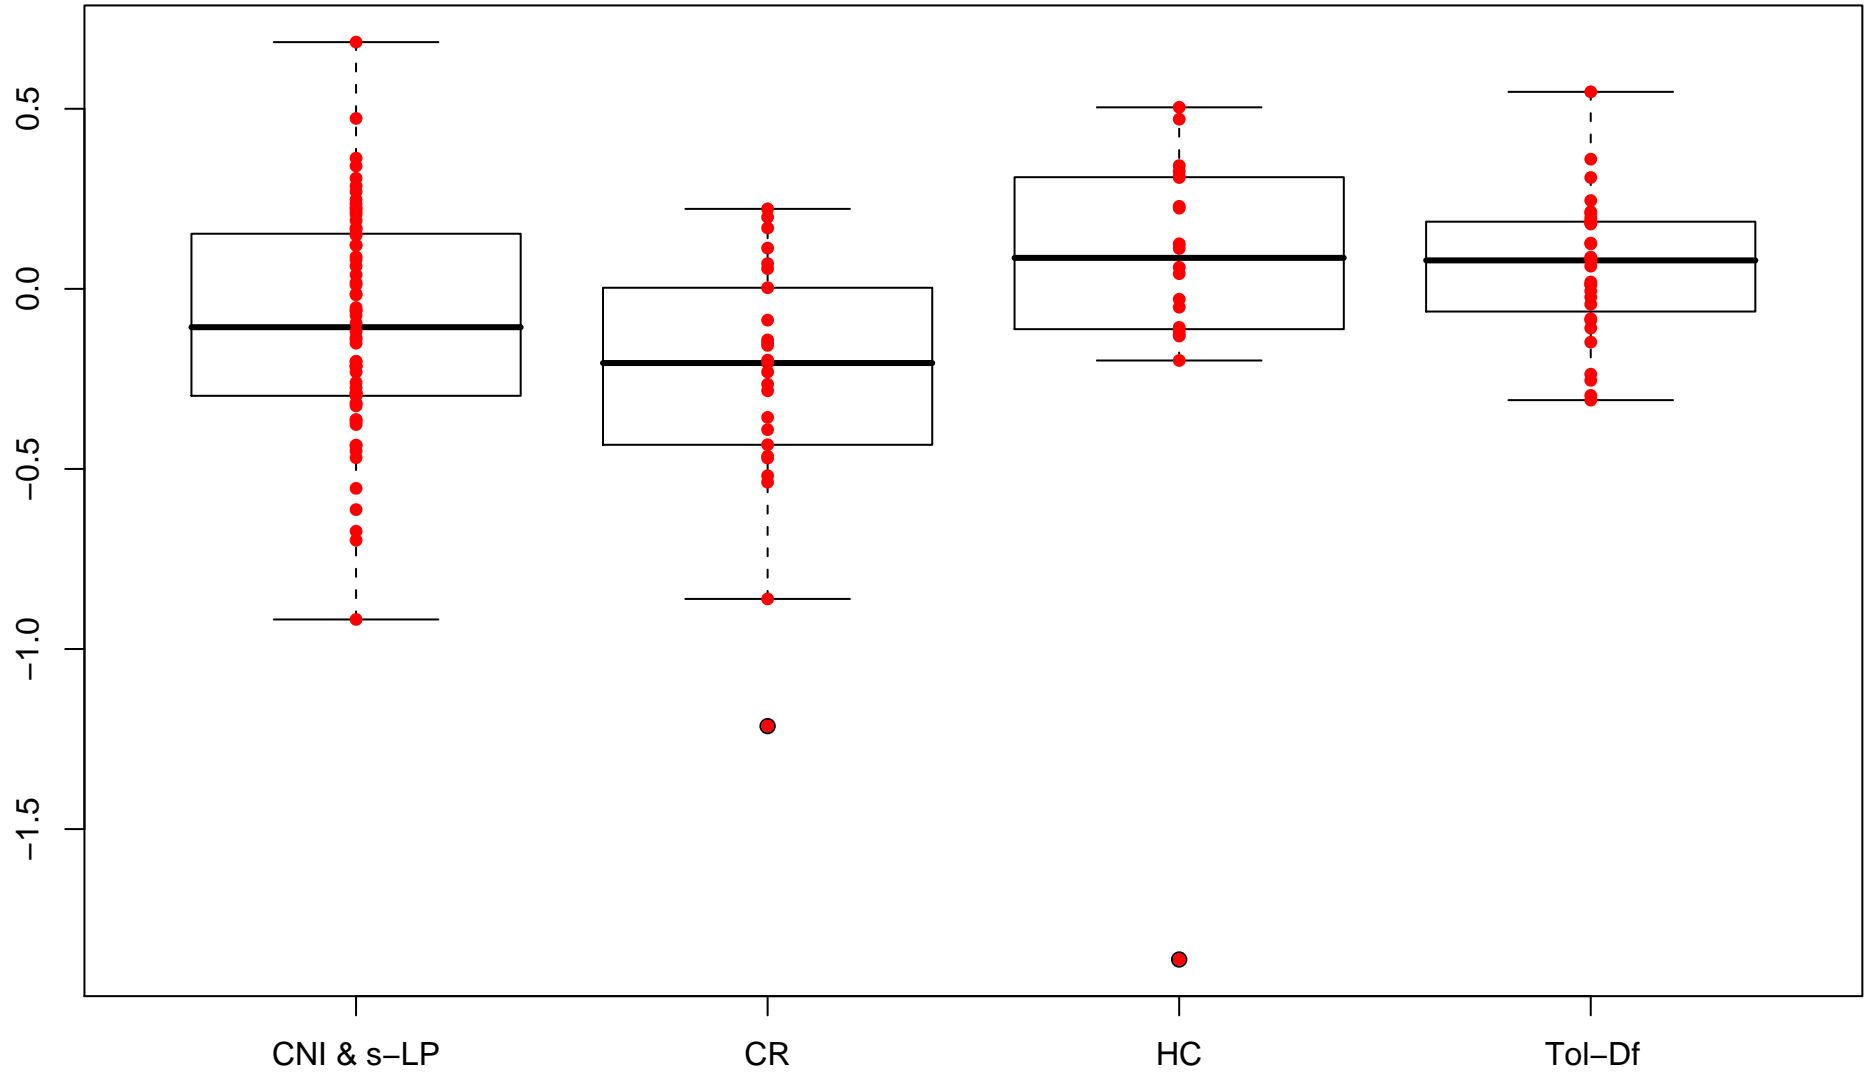

Rank 522 : SYT11  
0.00027101

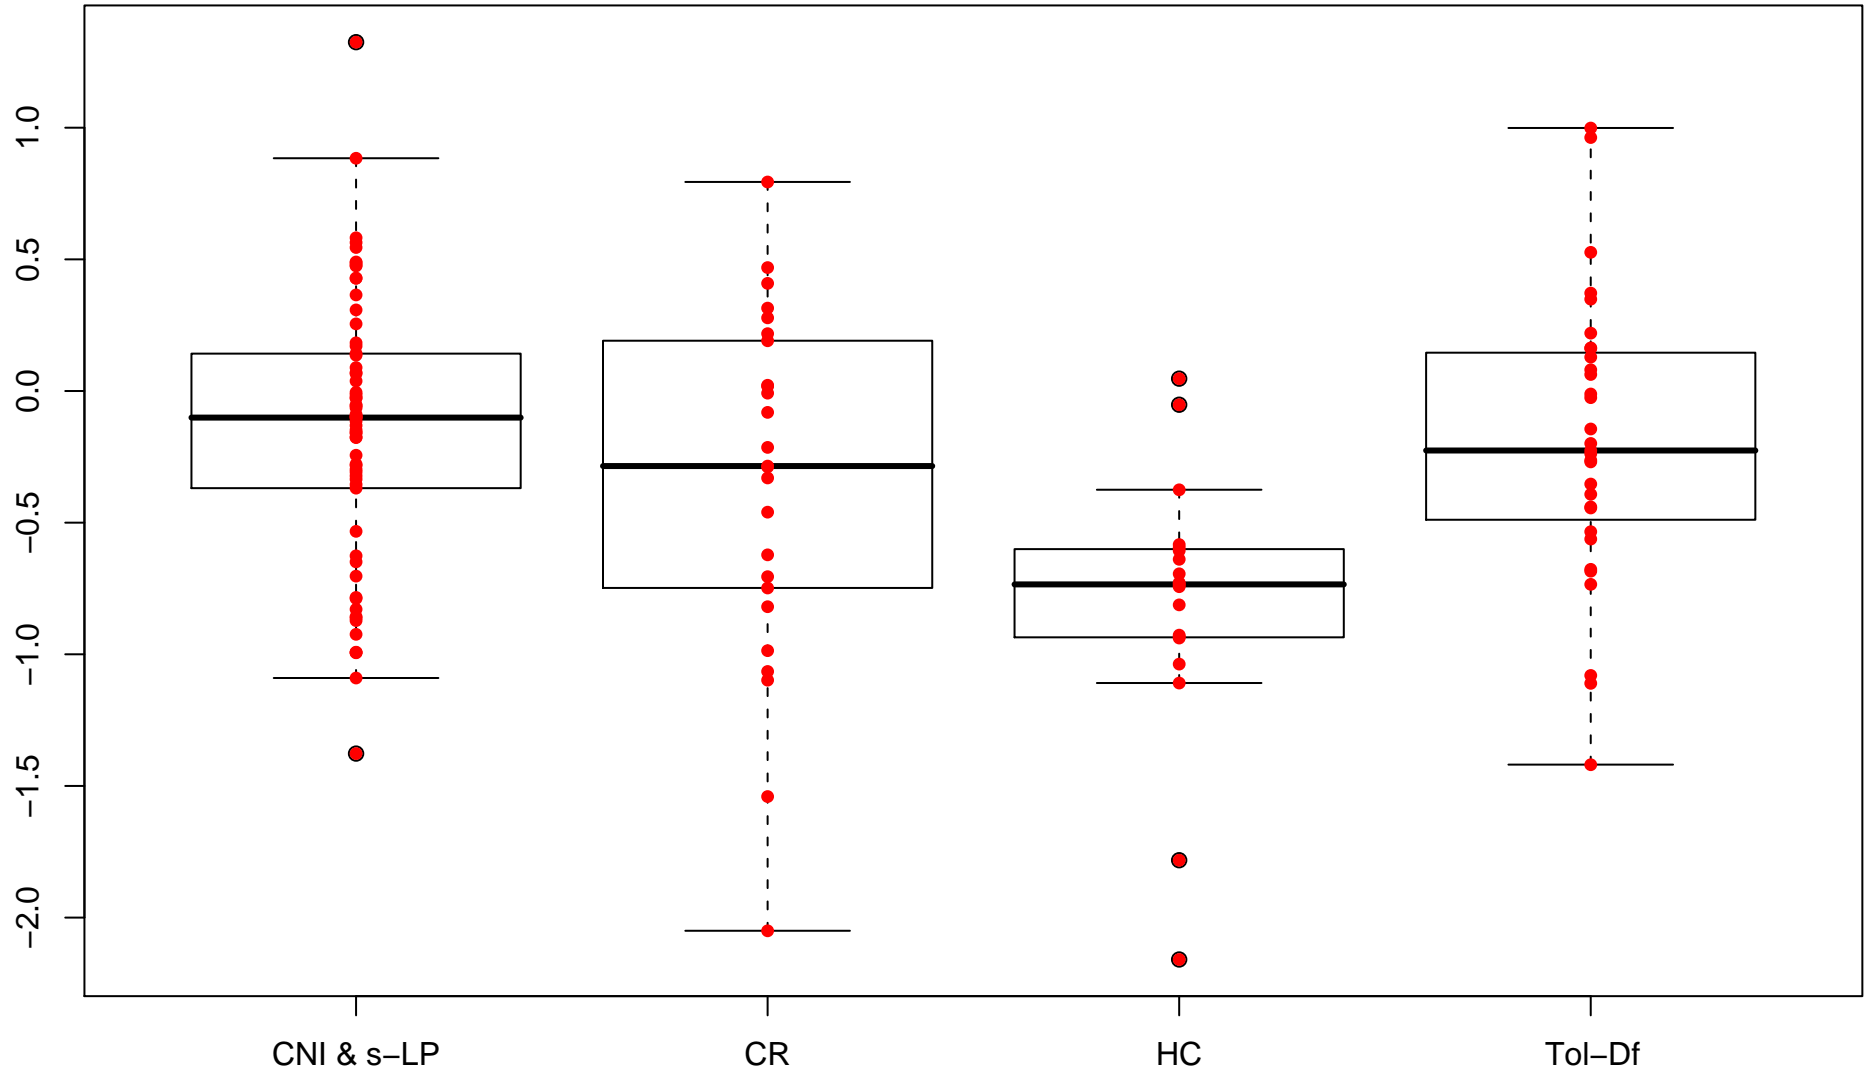

Rank 523 : LOC440354  
0.00027346

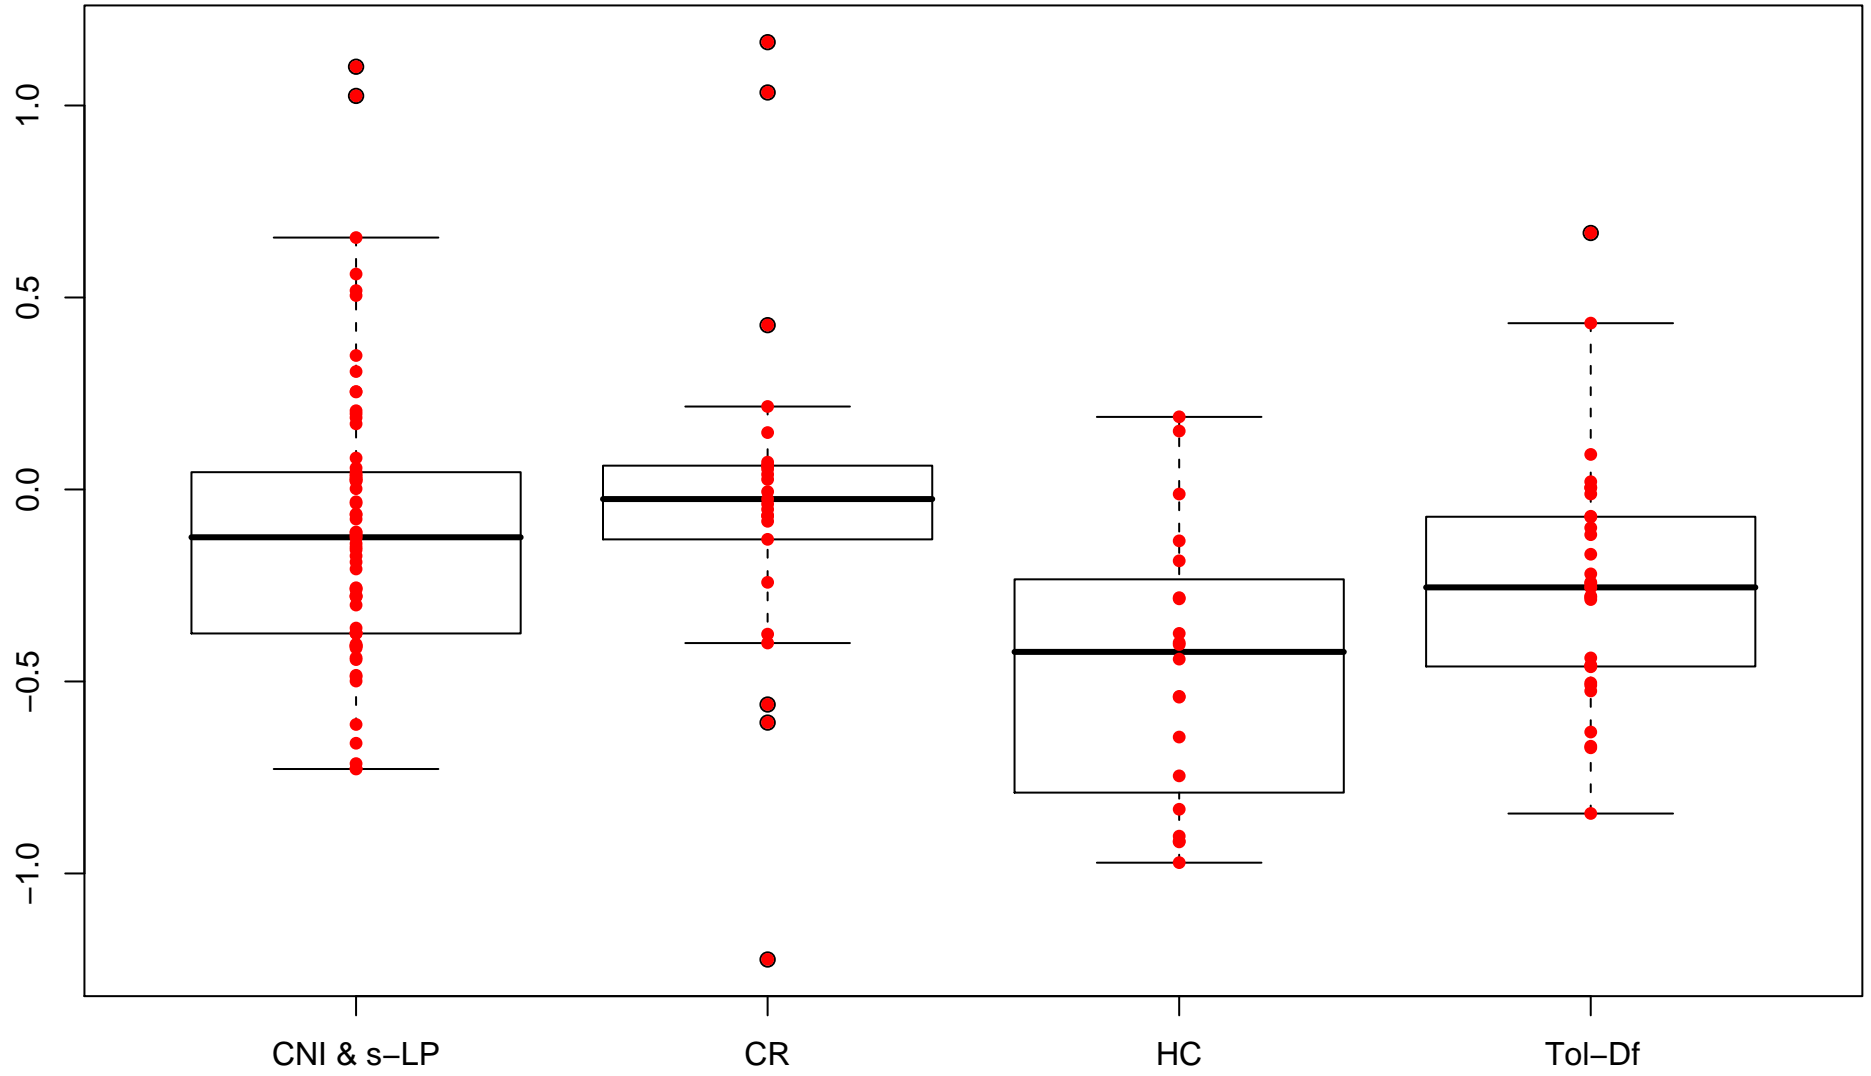

Rank 524 : TRD@  
0.00027617

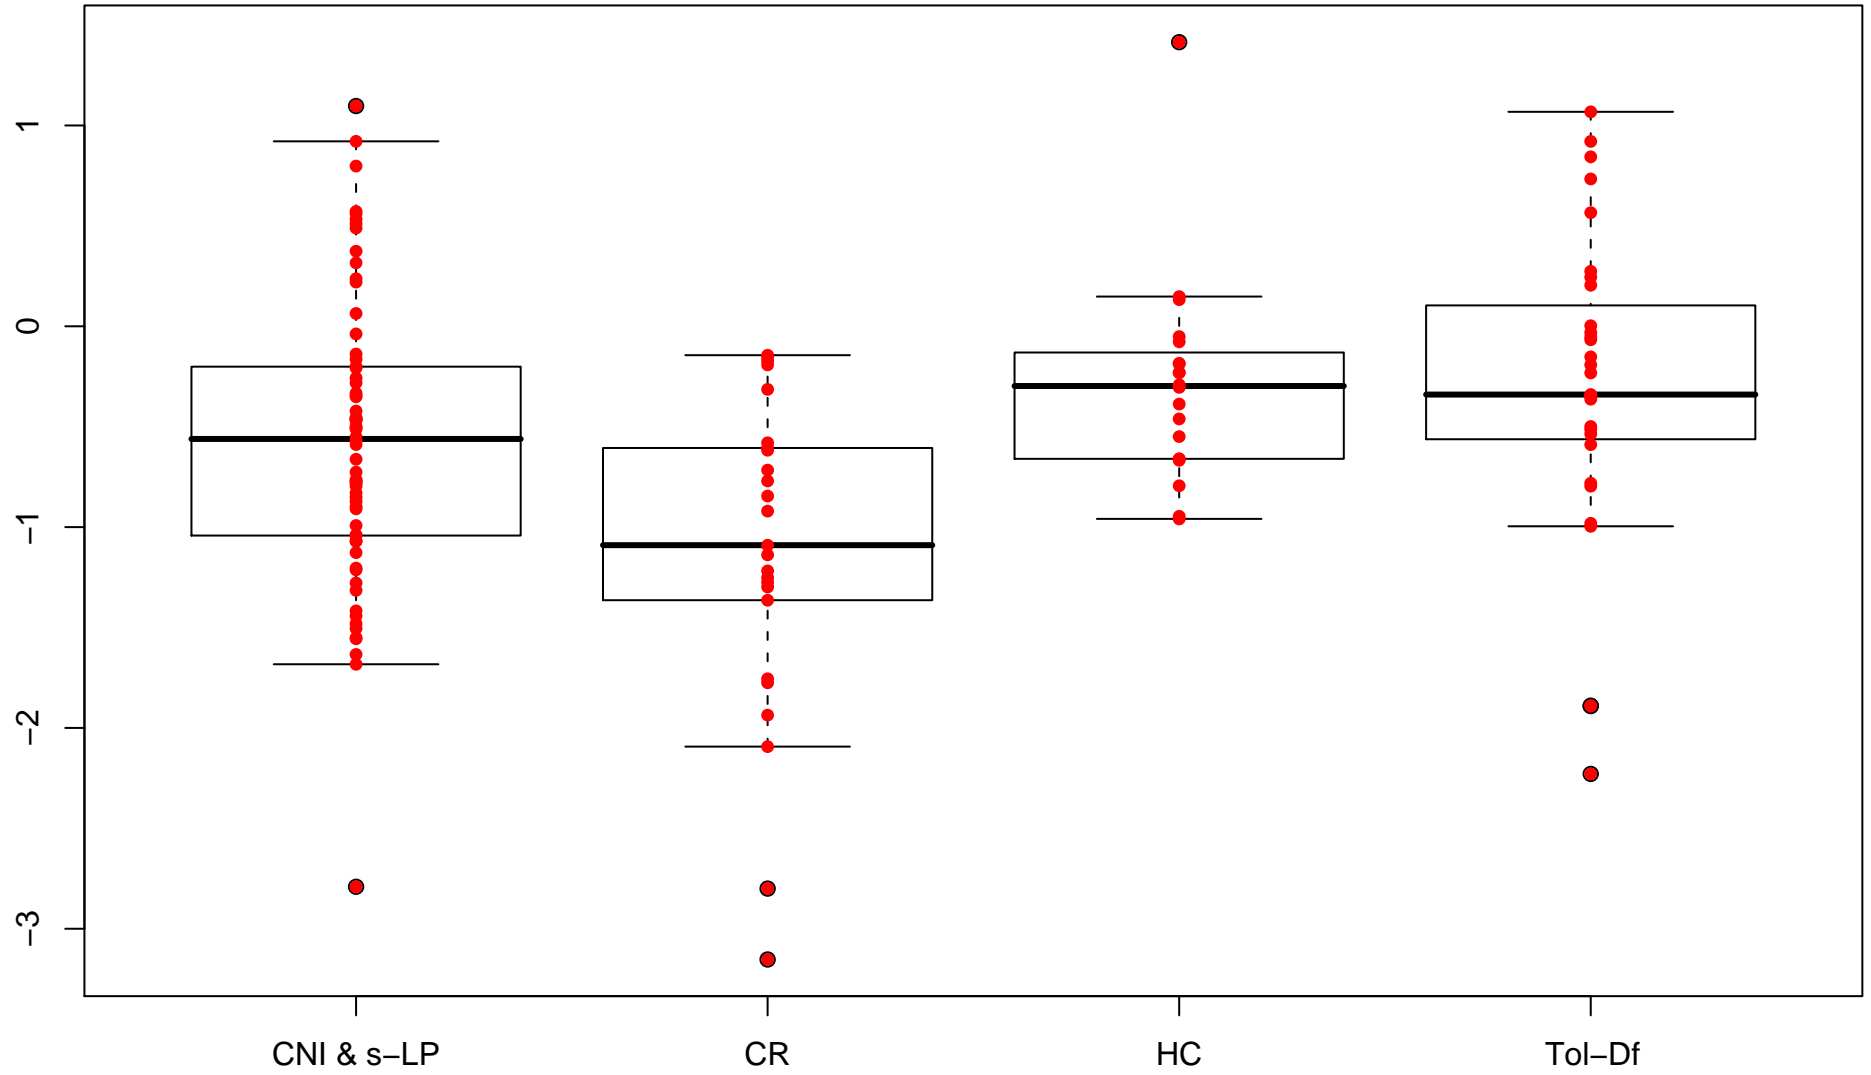

Rank 525 : KIF21A  
0.00027885

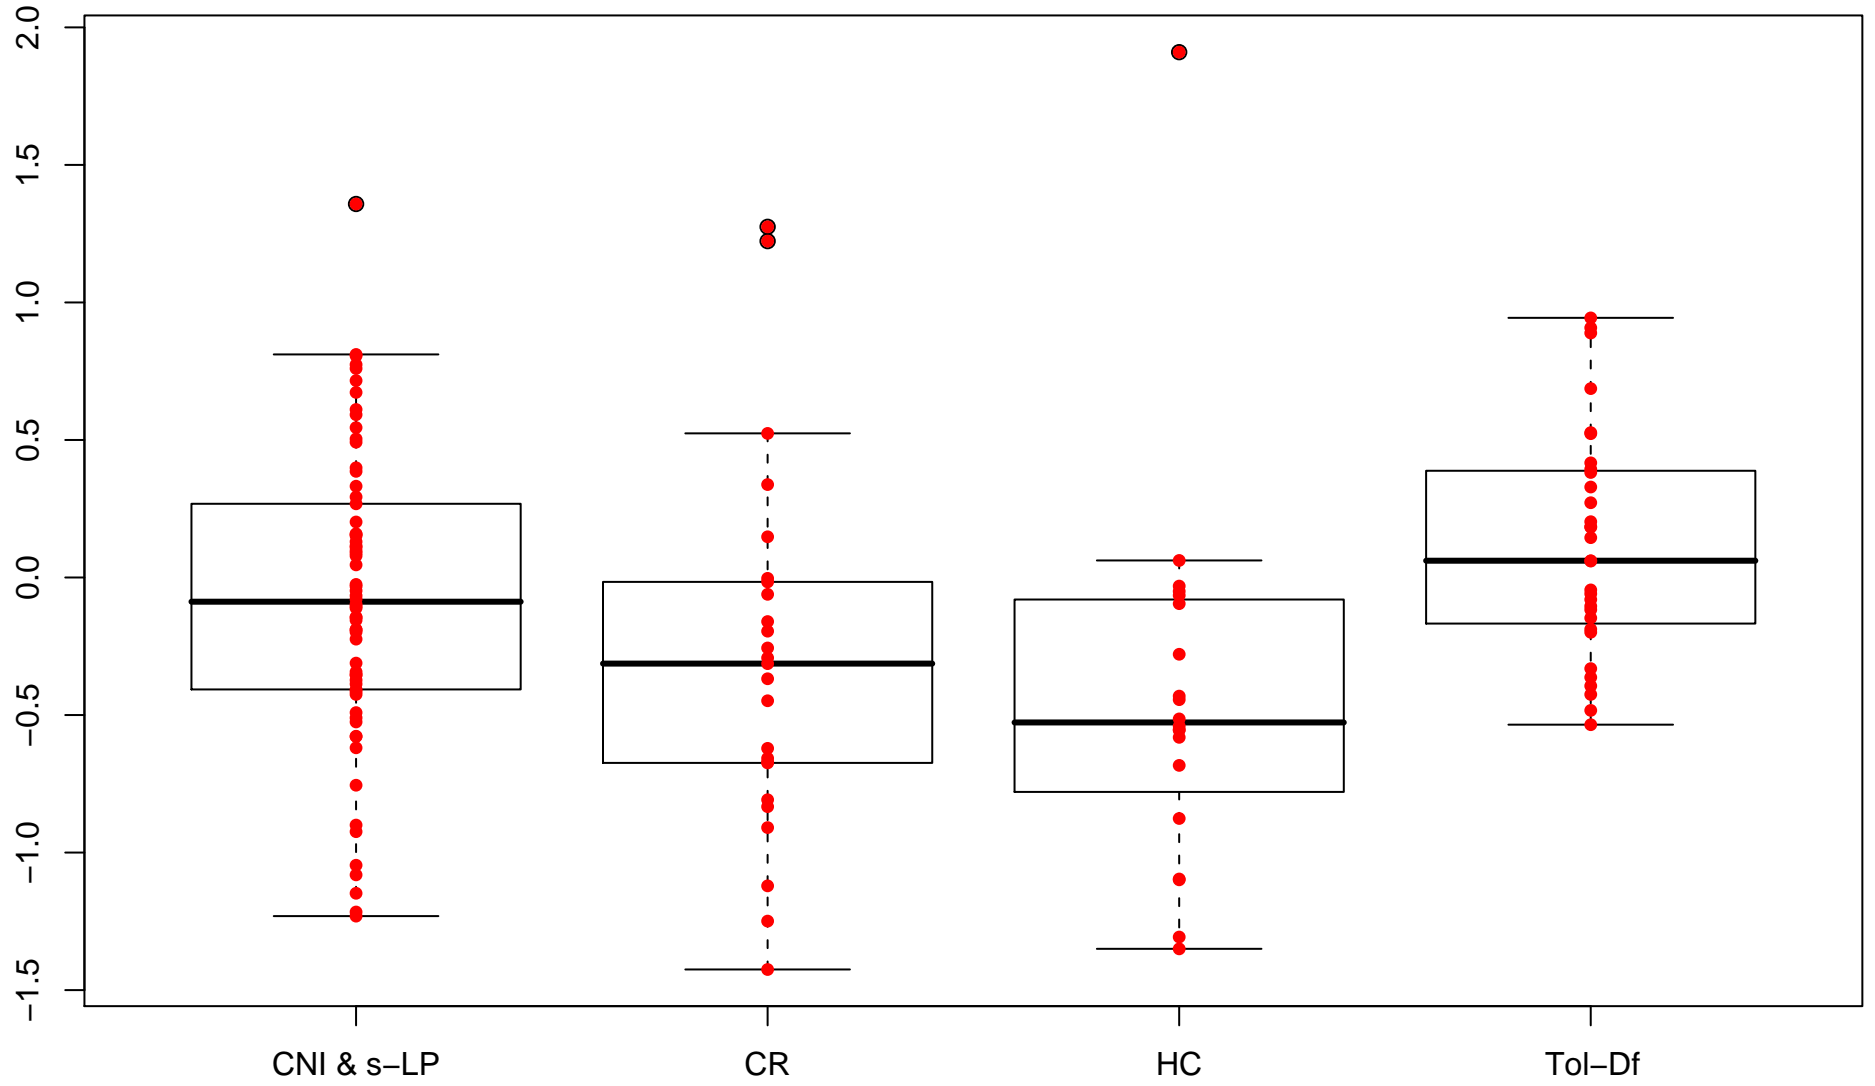

Rank 526 : MOBKL2A  
0.00028042

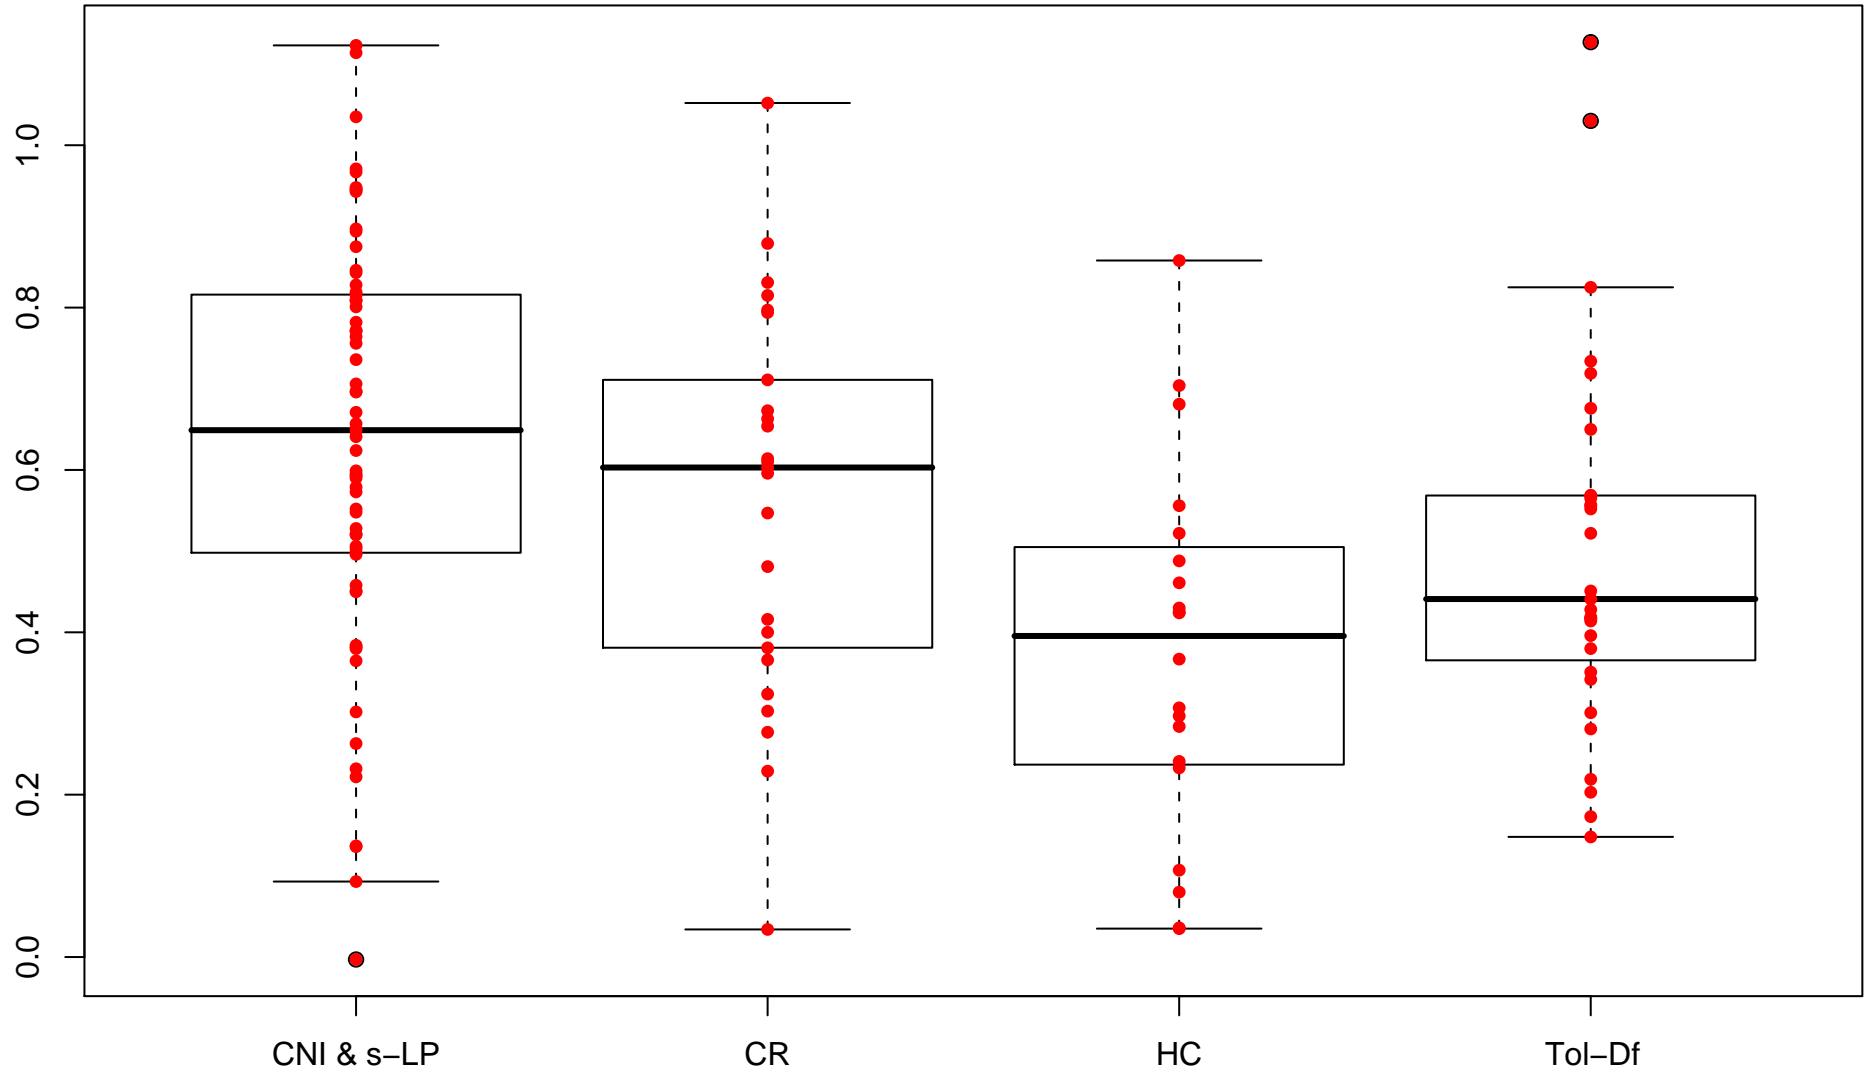

Rank 527 : LRBA  
0.00028255

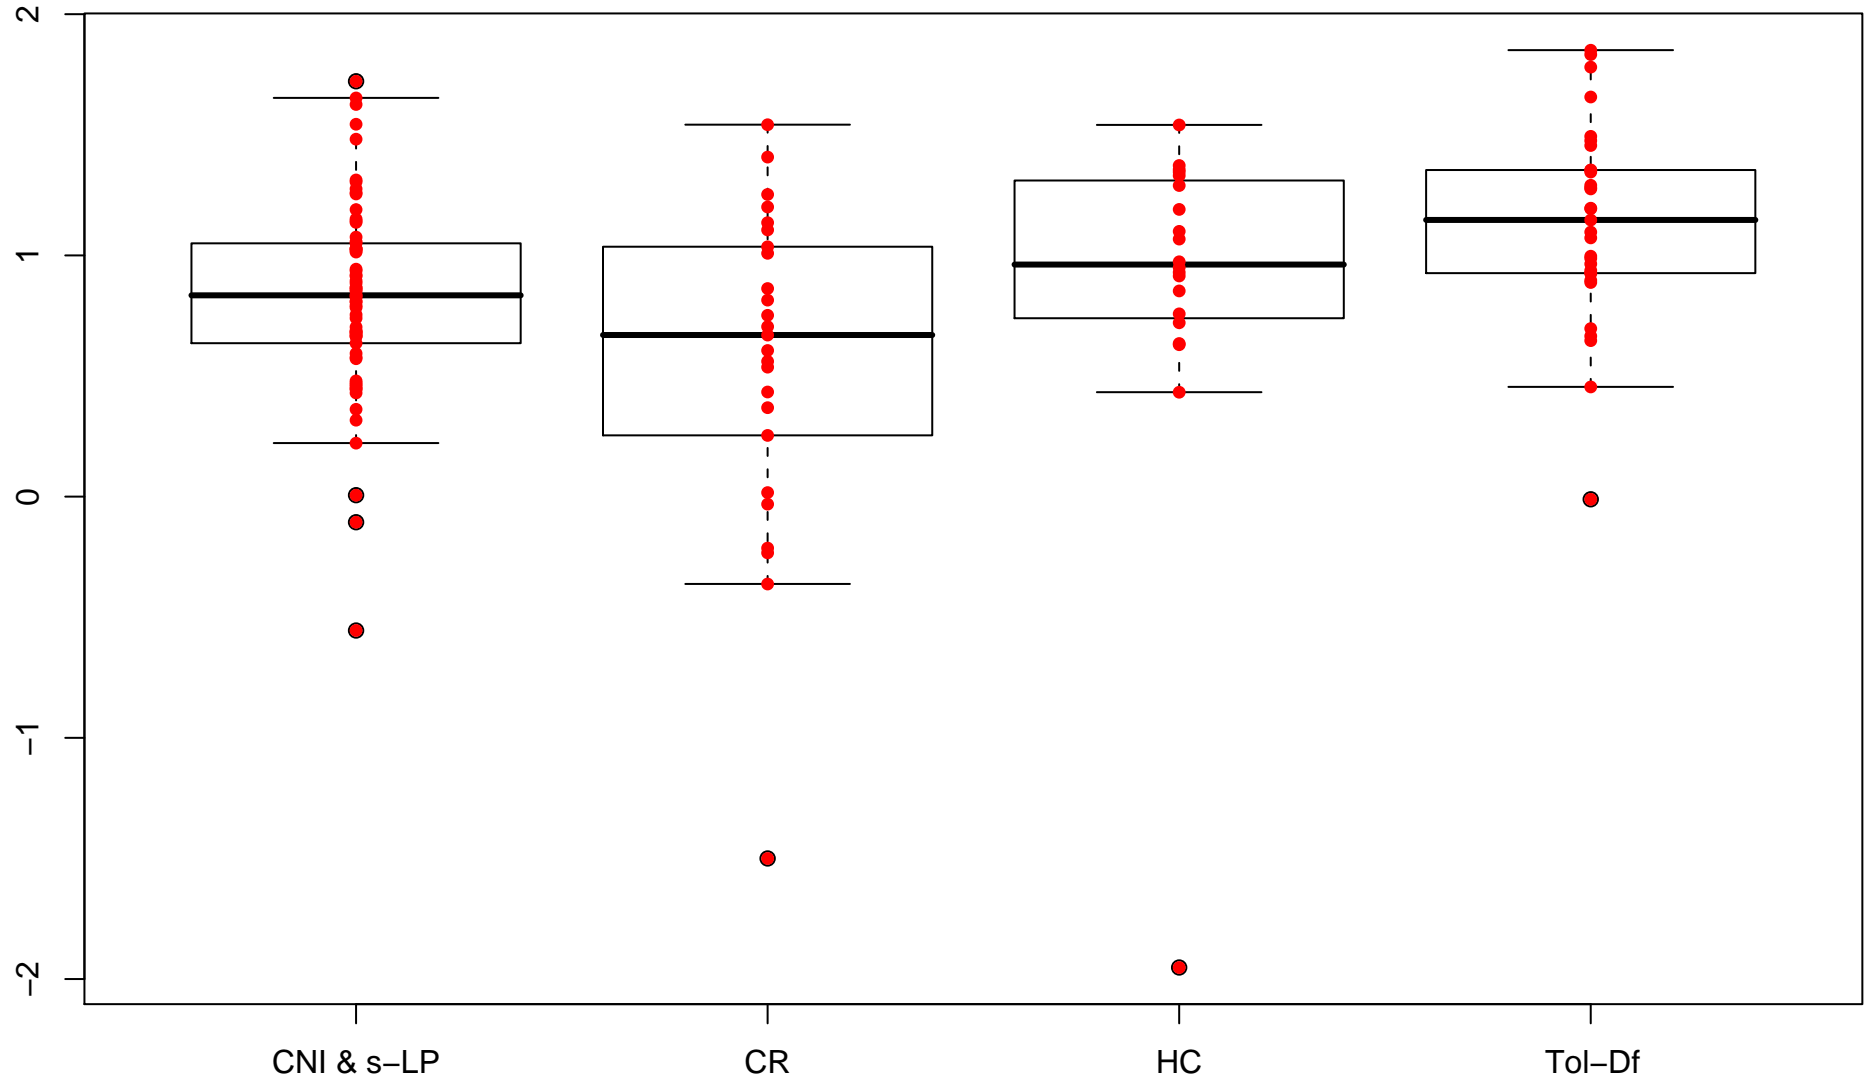



Rank 528 : AK095738  
0.00028555

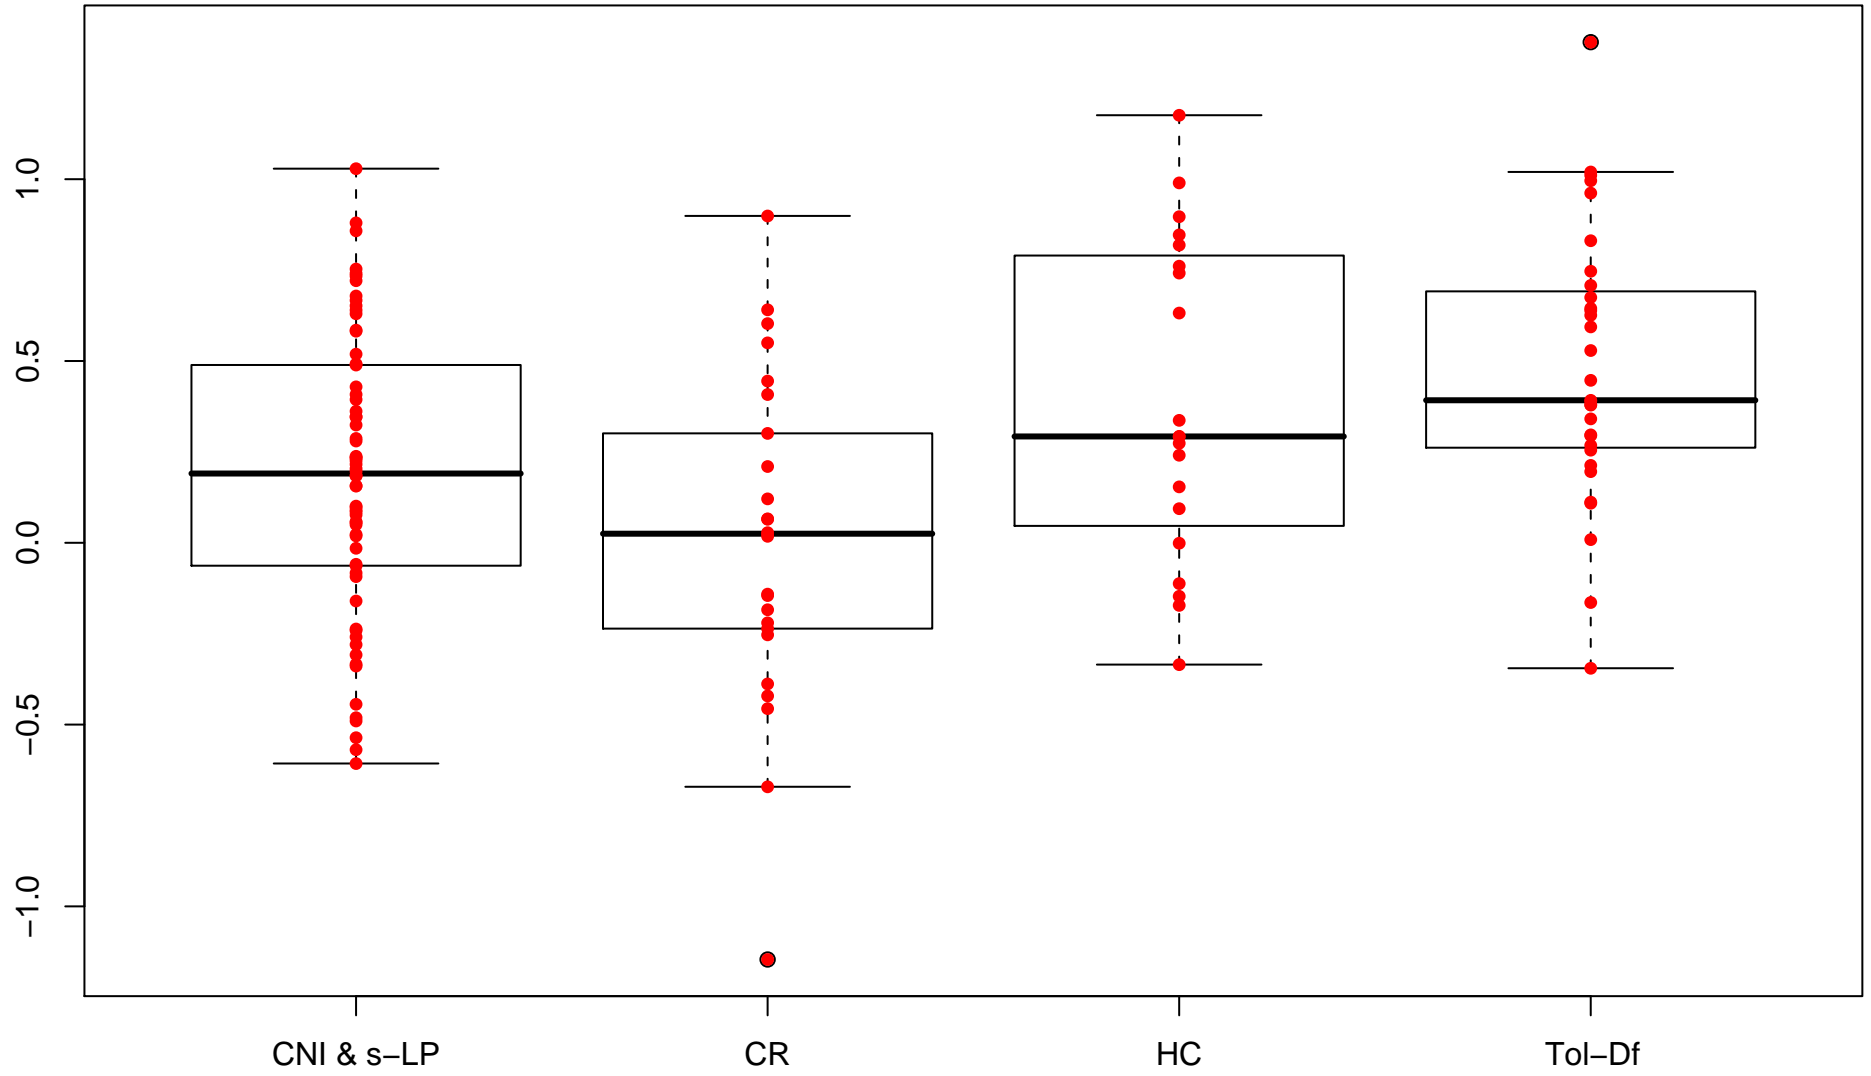

Rank 529 : CENPQ  
0.00028794

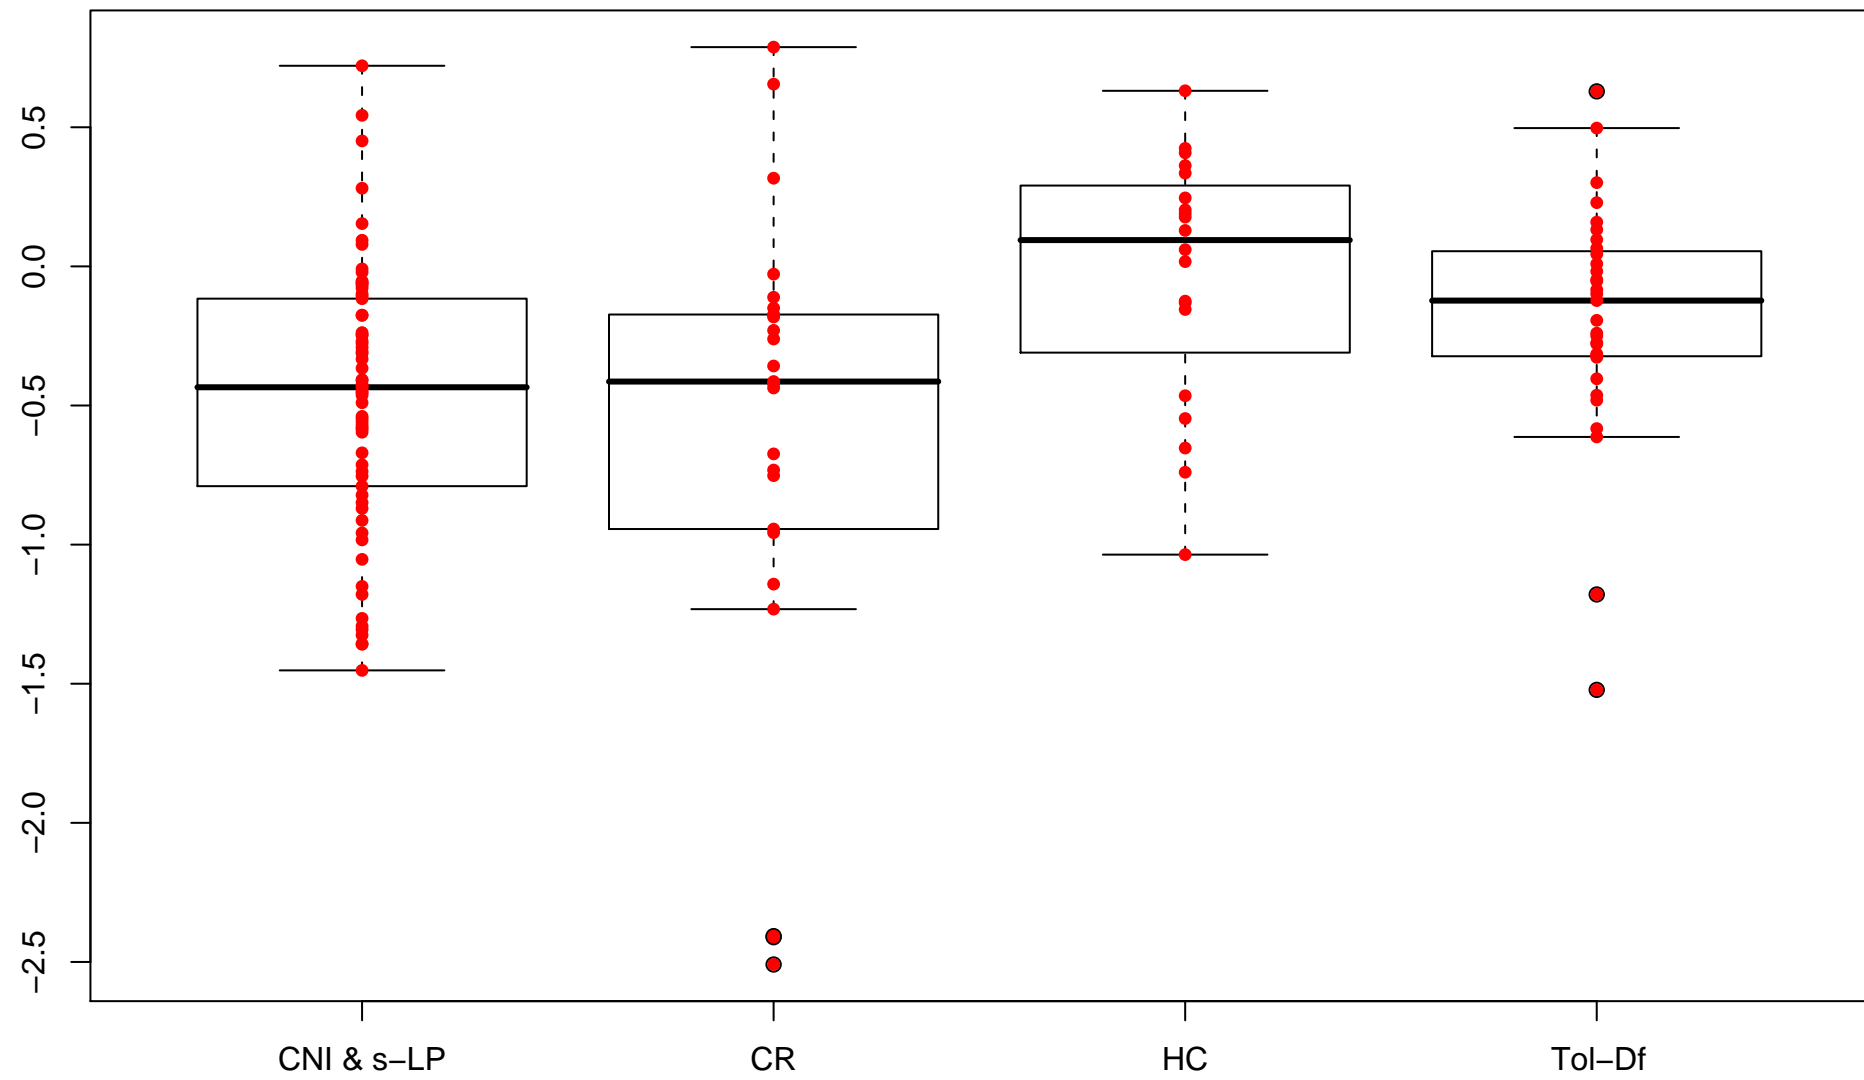

Rank 530 : CXCL16  
0.00029013

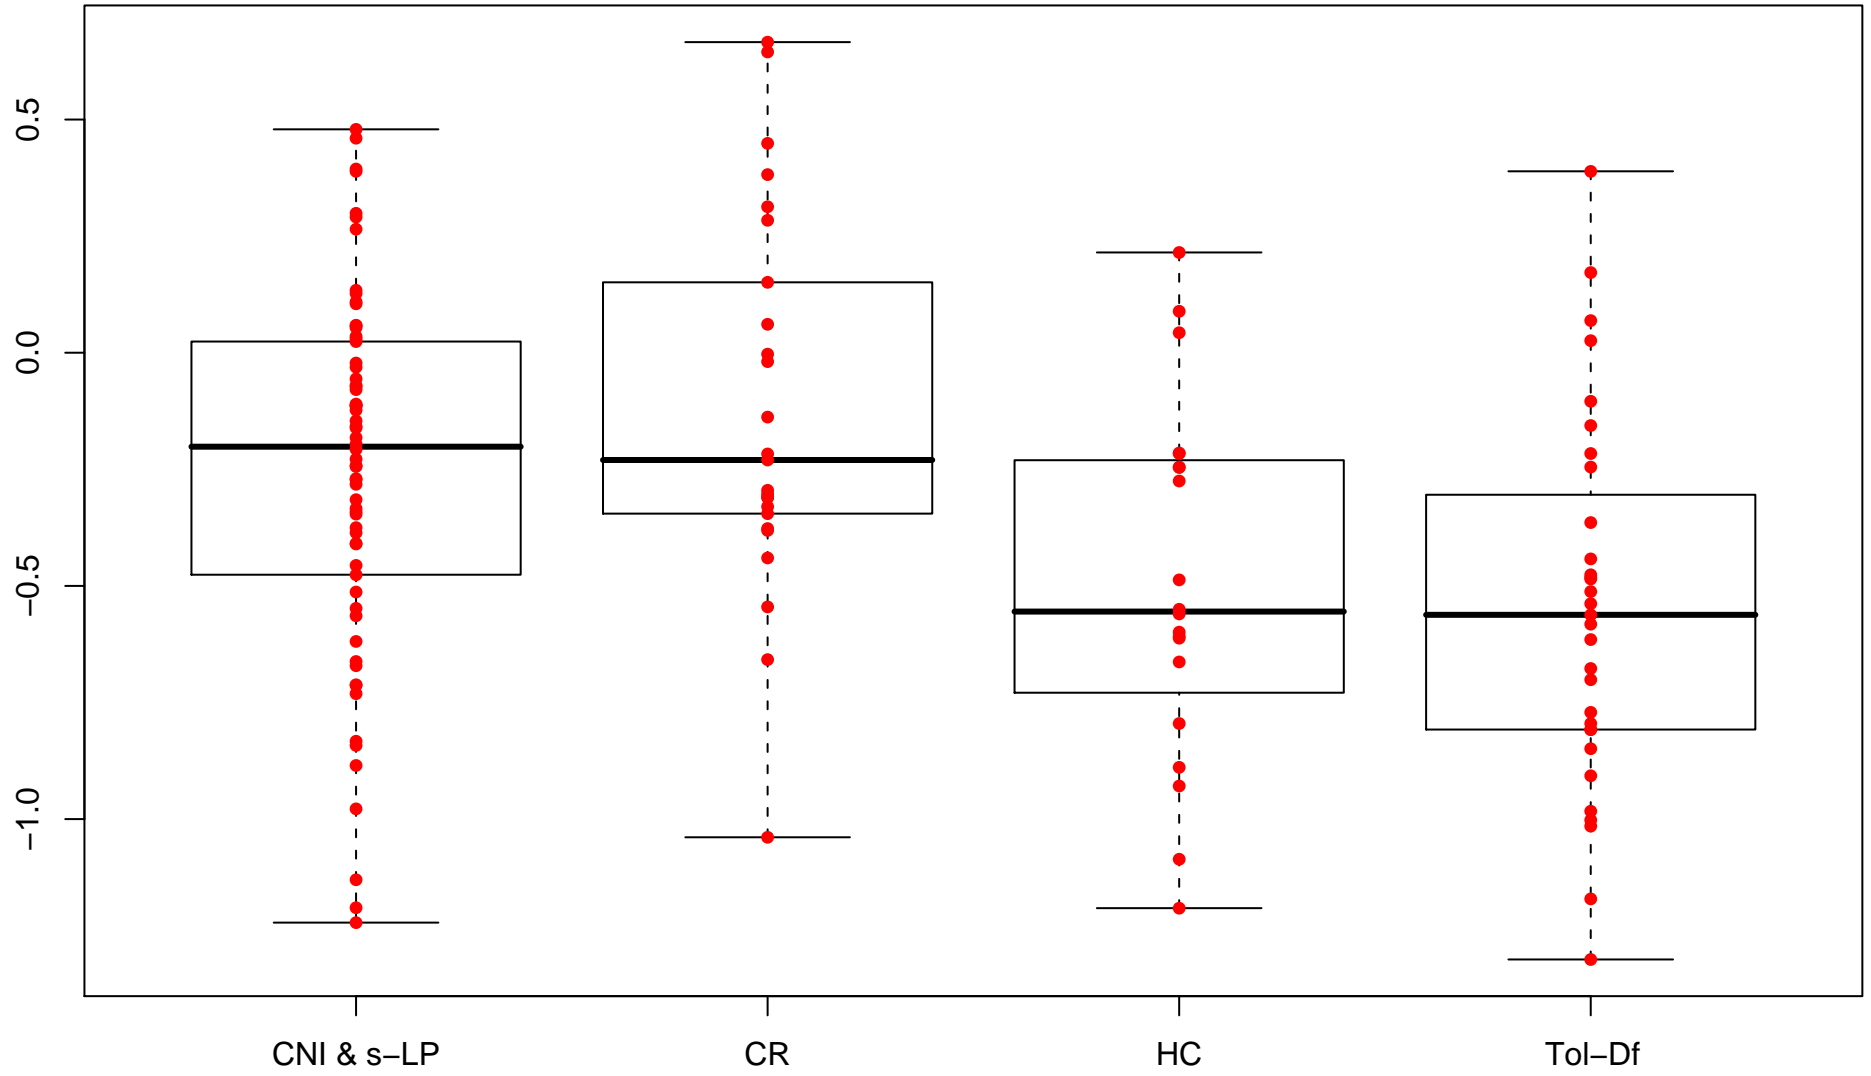

Rank 531 : USP47  
0.00029072

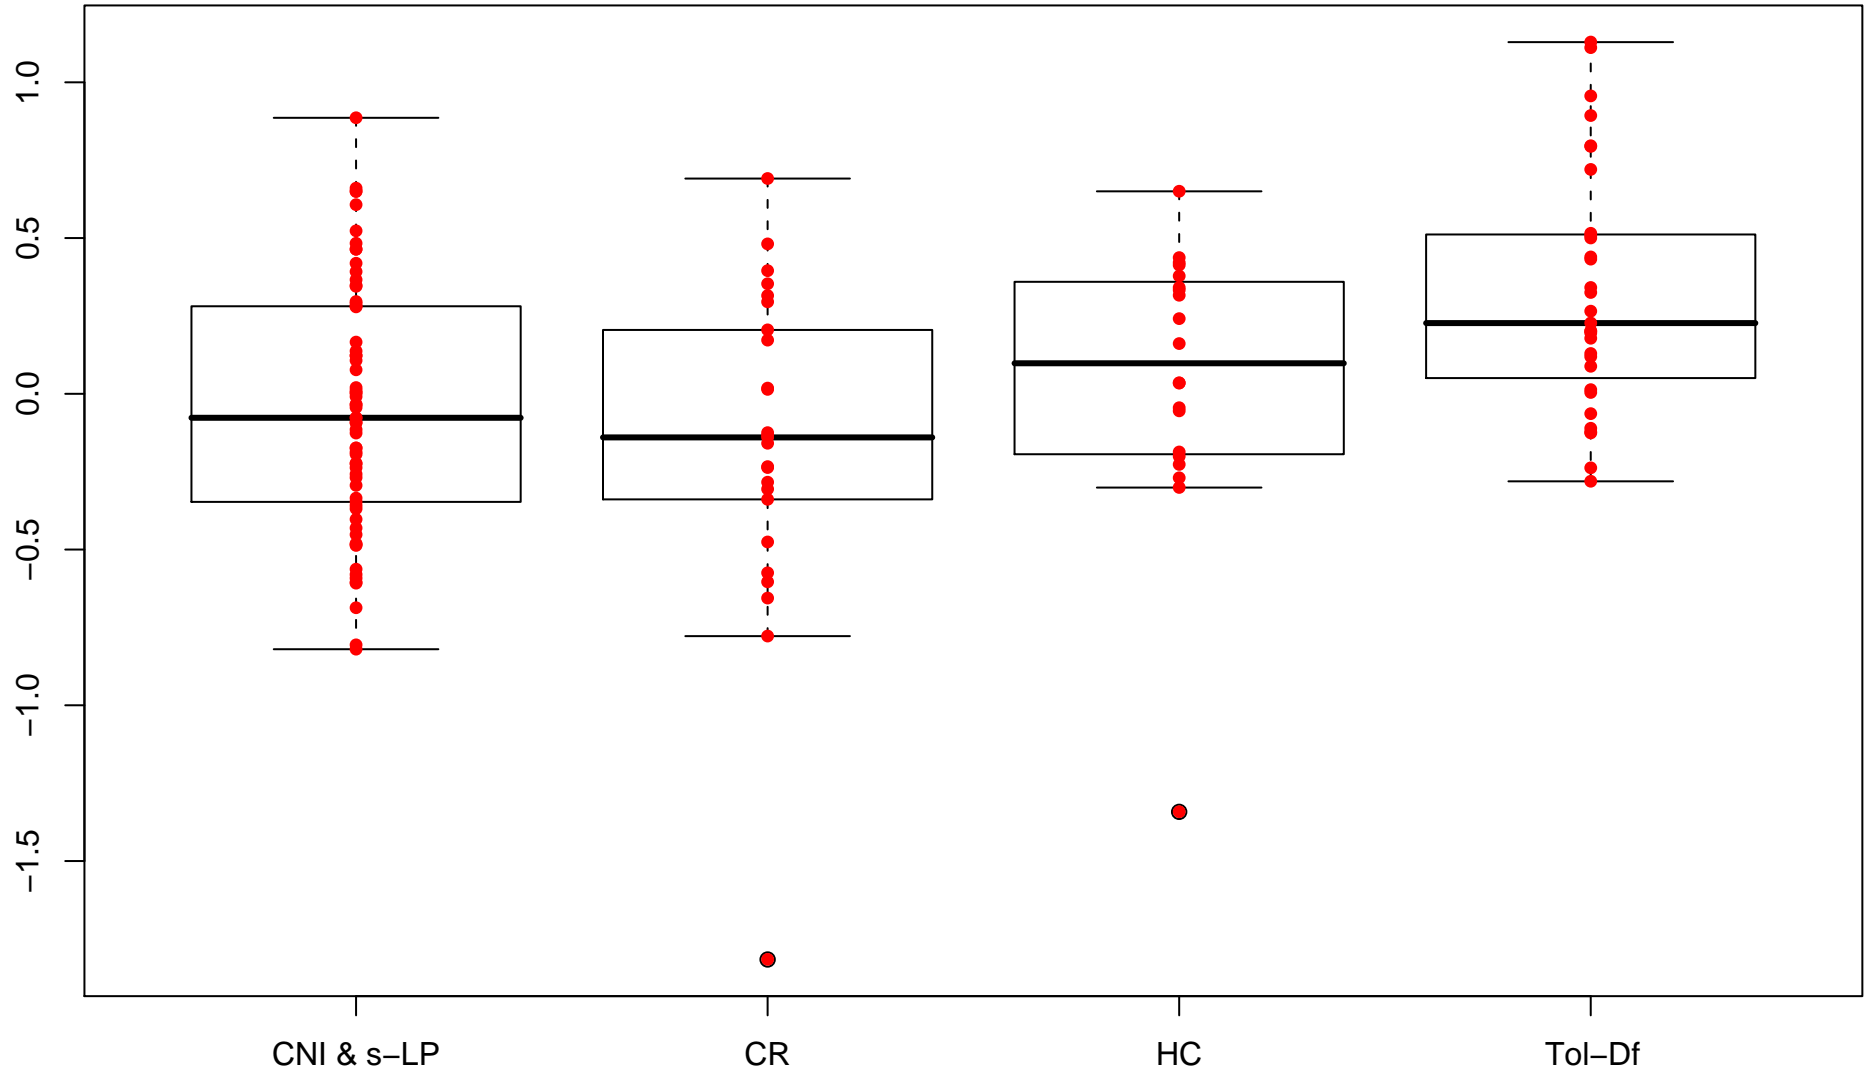

Rank 532 : TGFBR3  
0.00029394

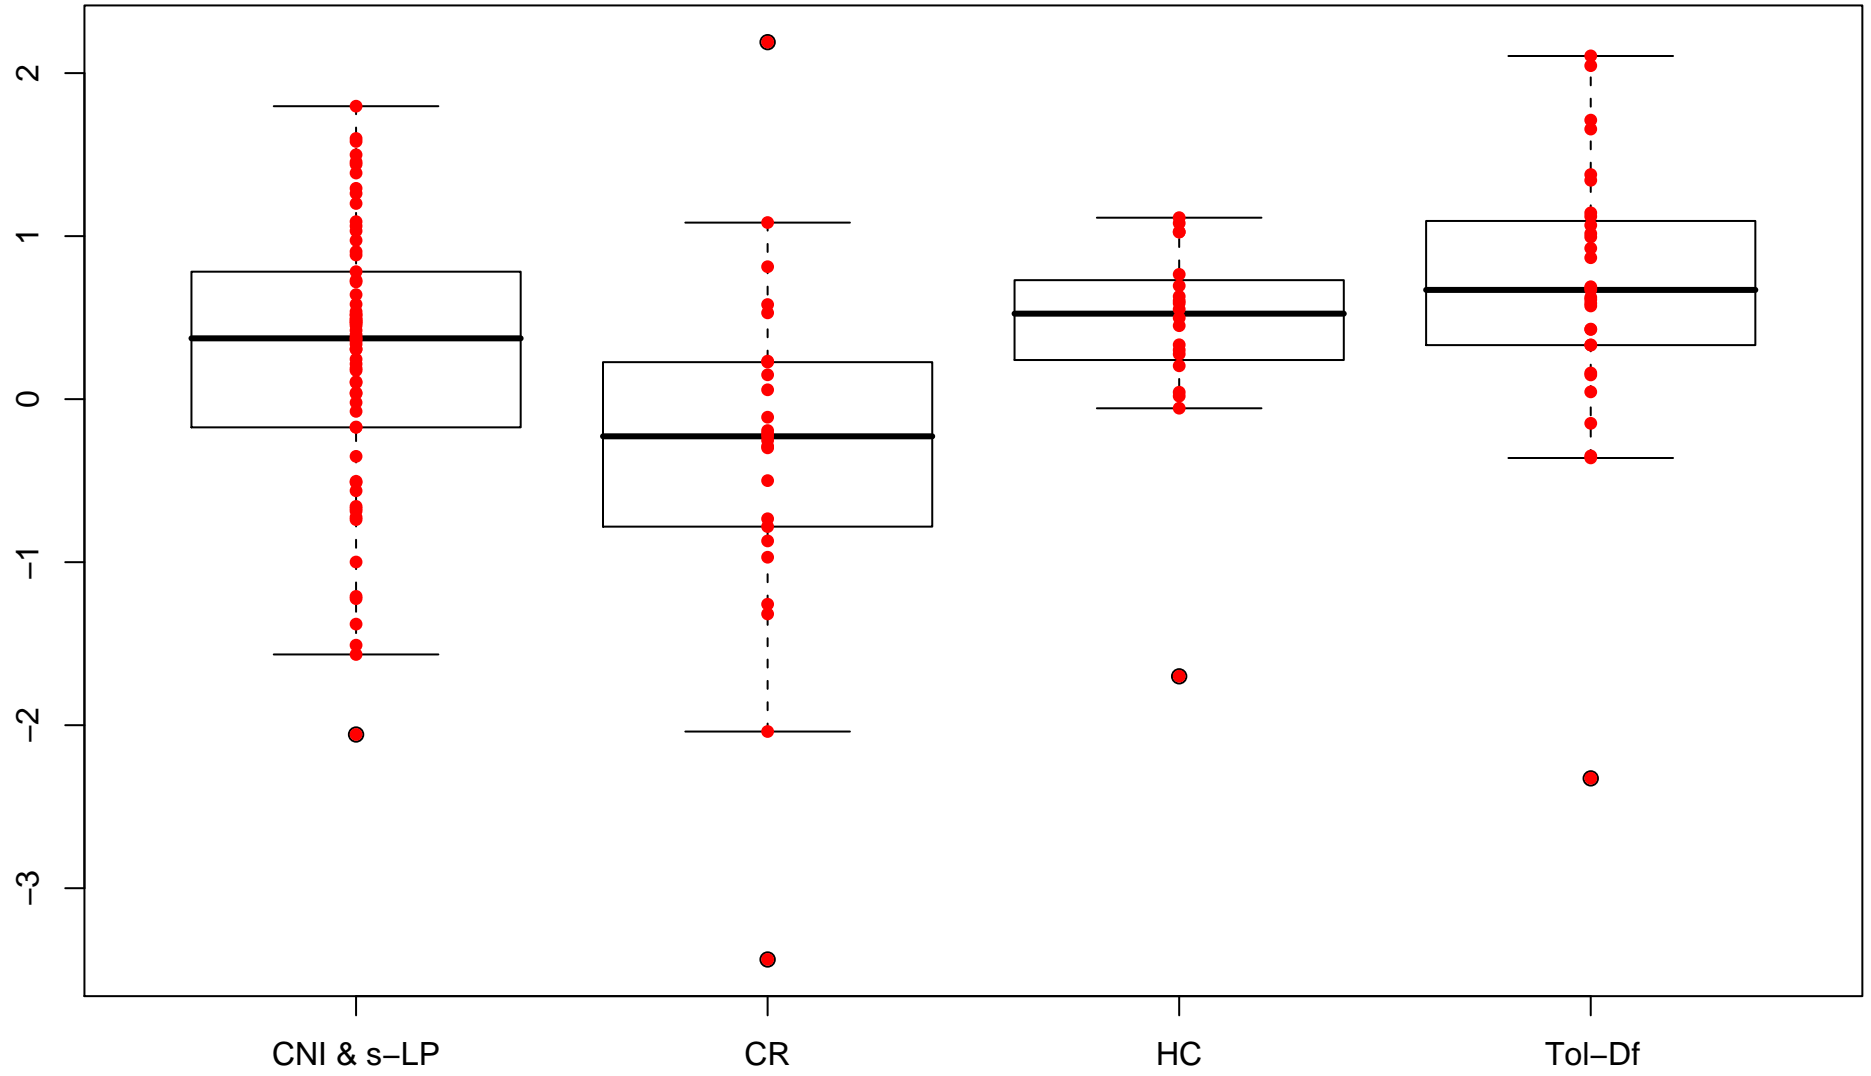

Rank 533 : CD96  
0.00029416

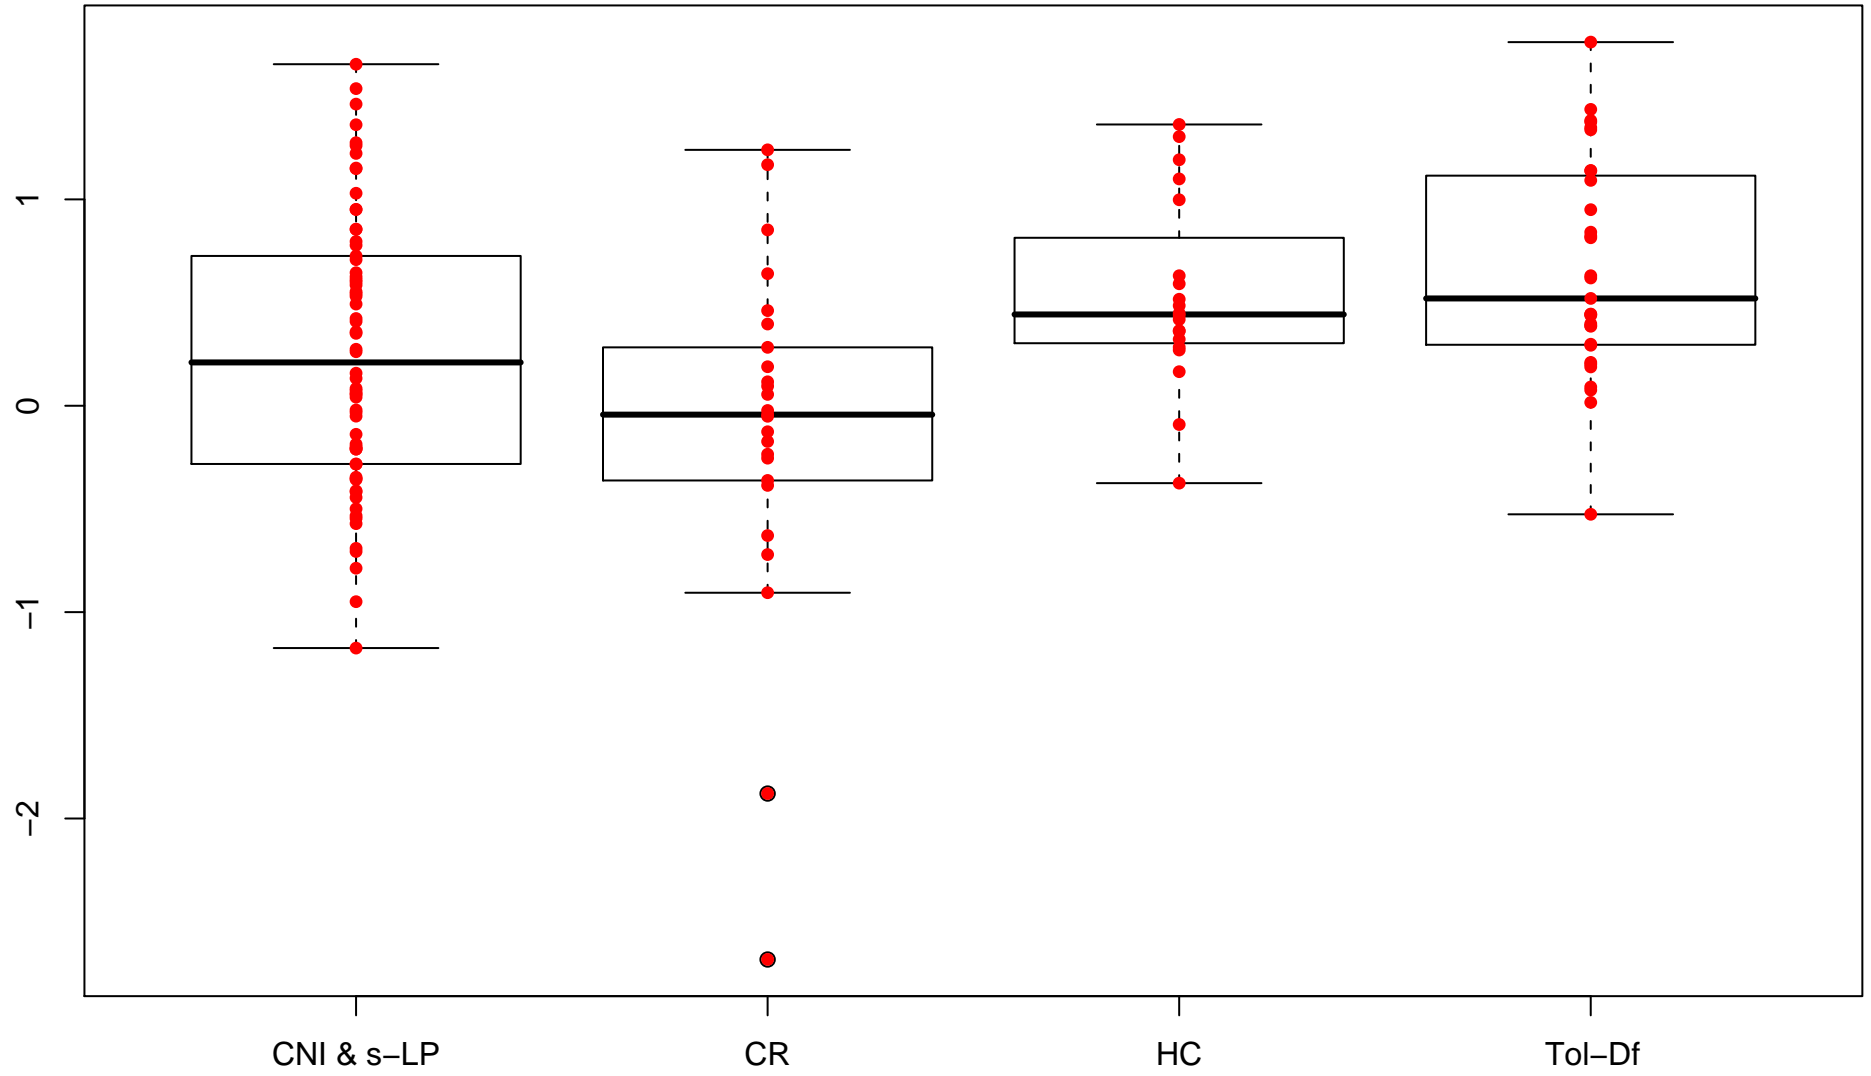

Rank 534 : PTK2B  
0.00029592

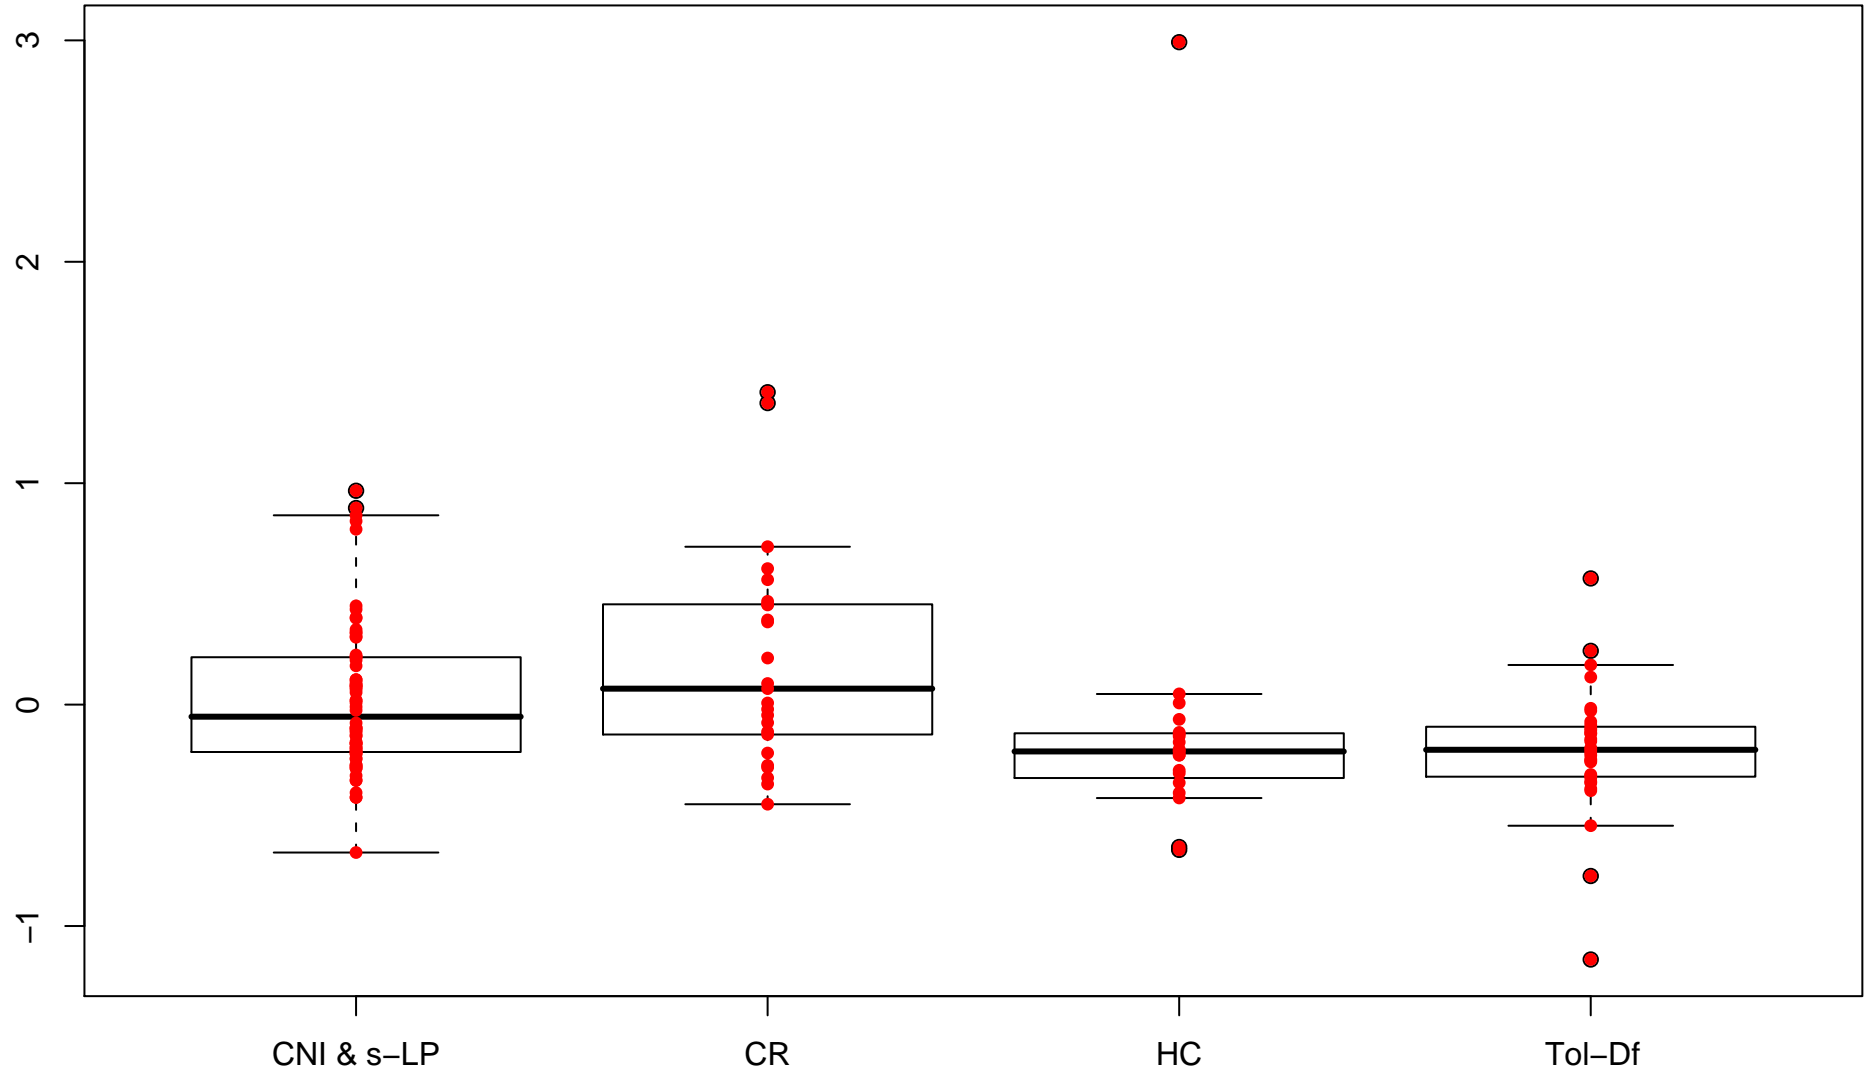

Rank 535 : CDC42BPA  
0.00029742

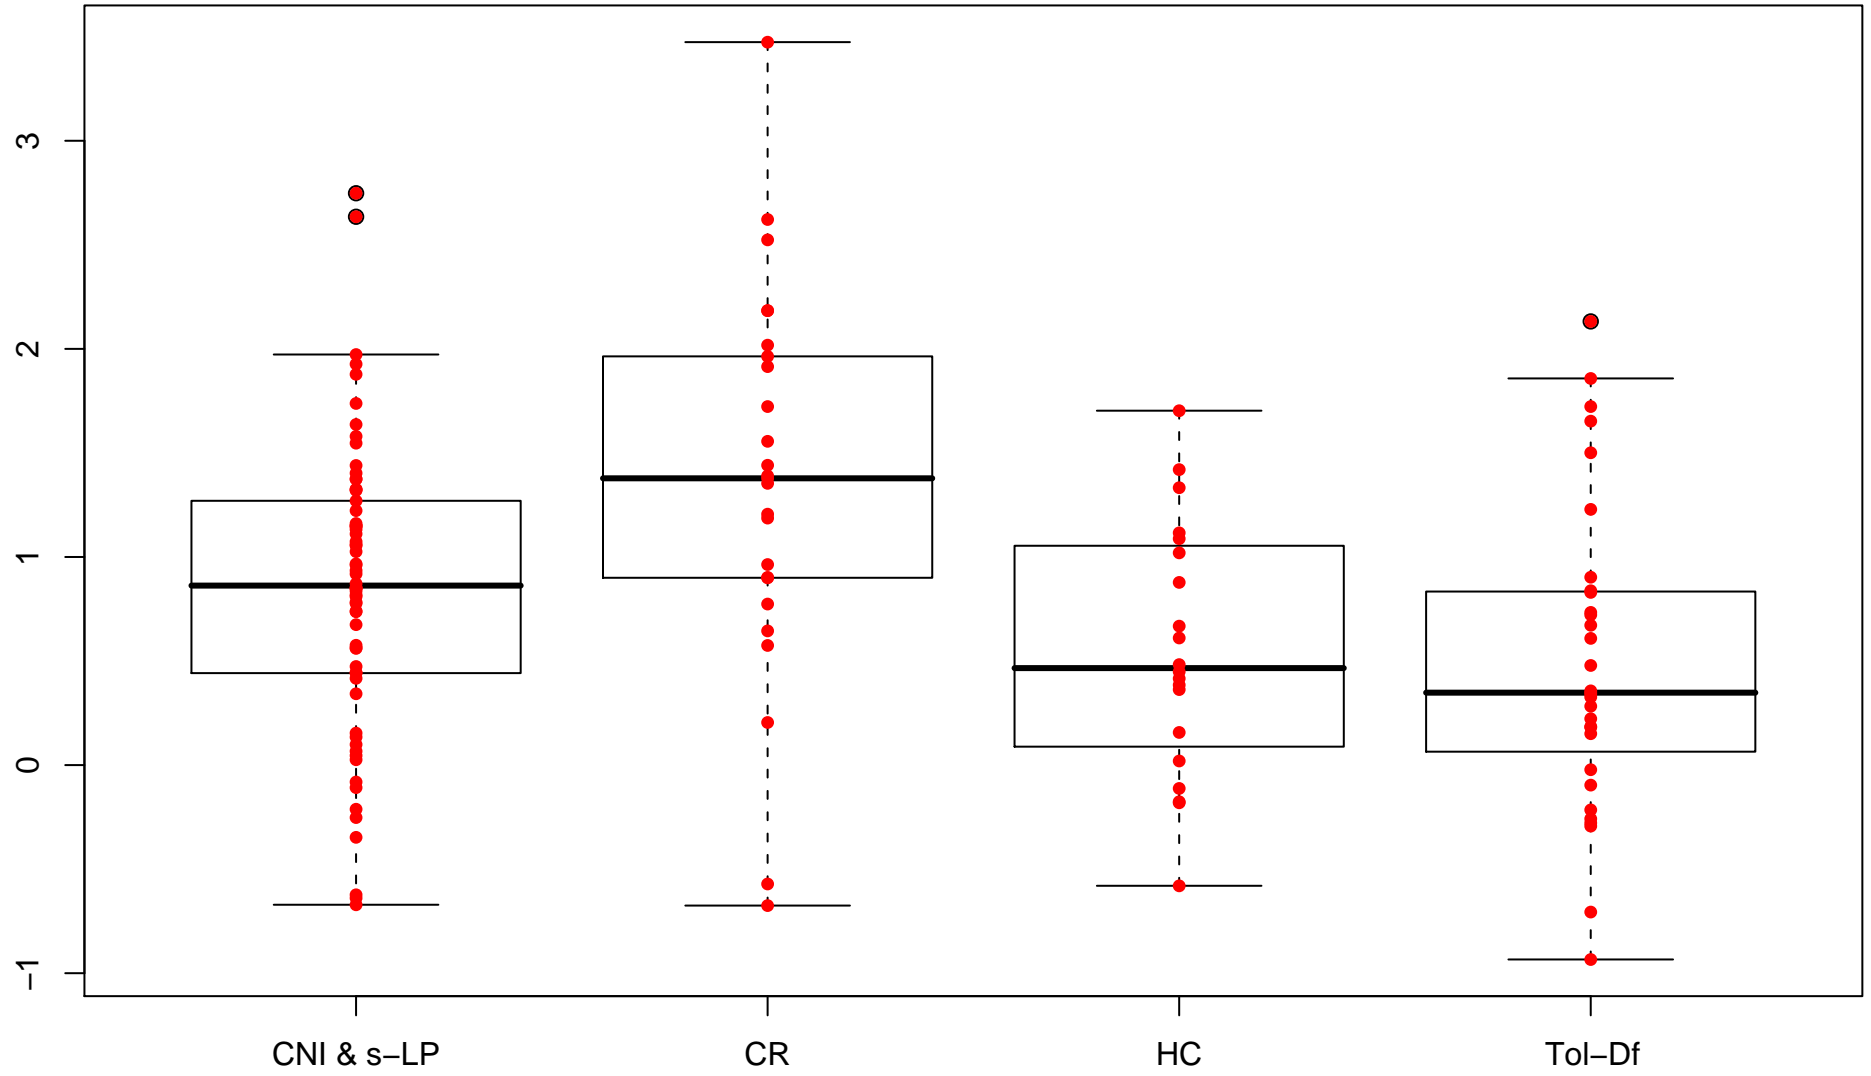



Rank 536 : C21ORF34  
0.00029813

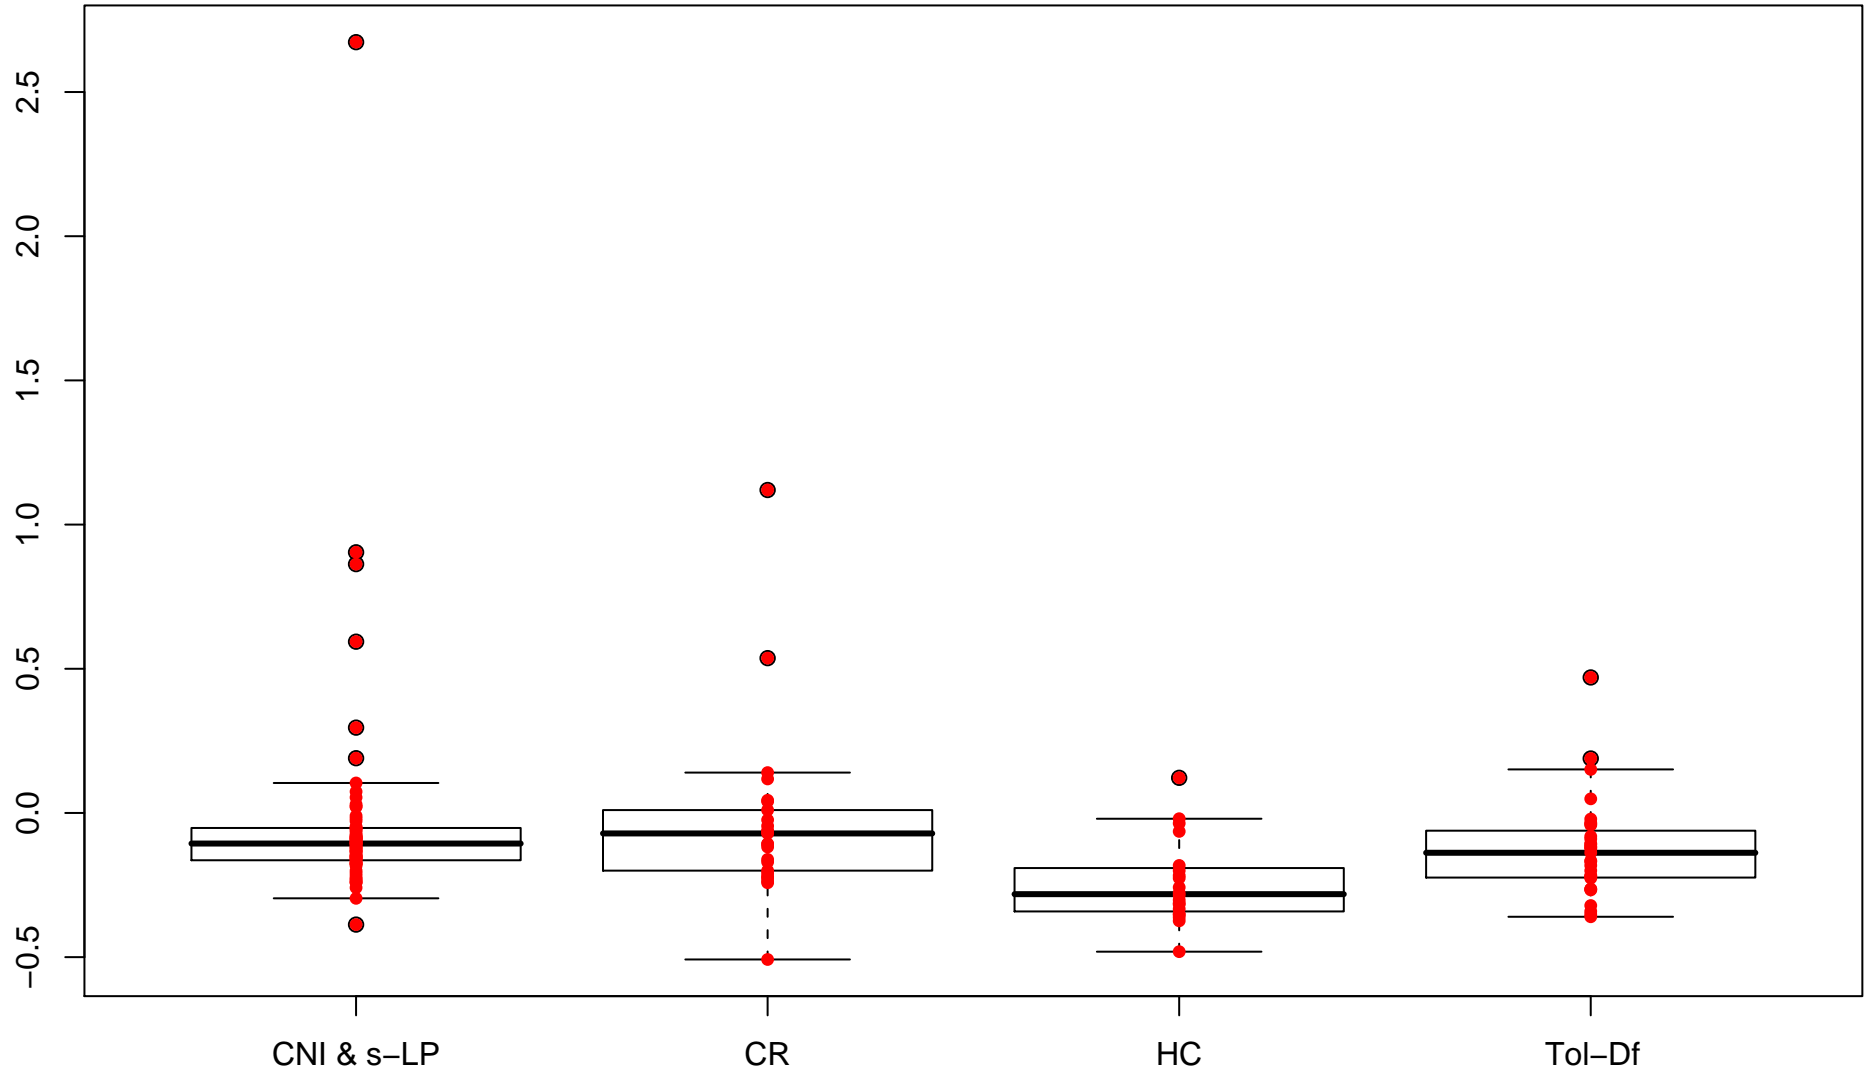

Rank 537 : N-PAC  
0.00030107

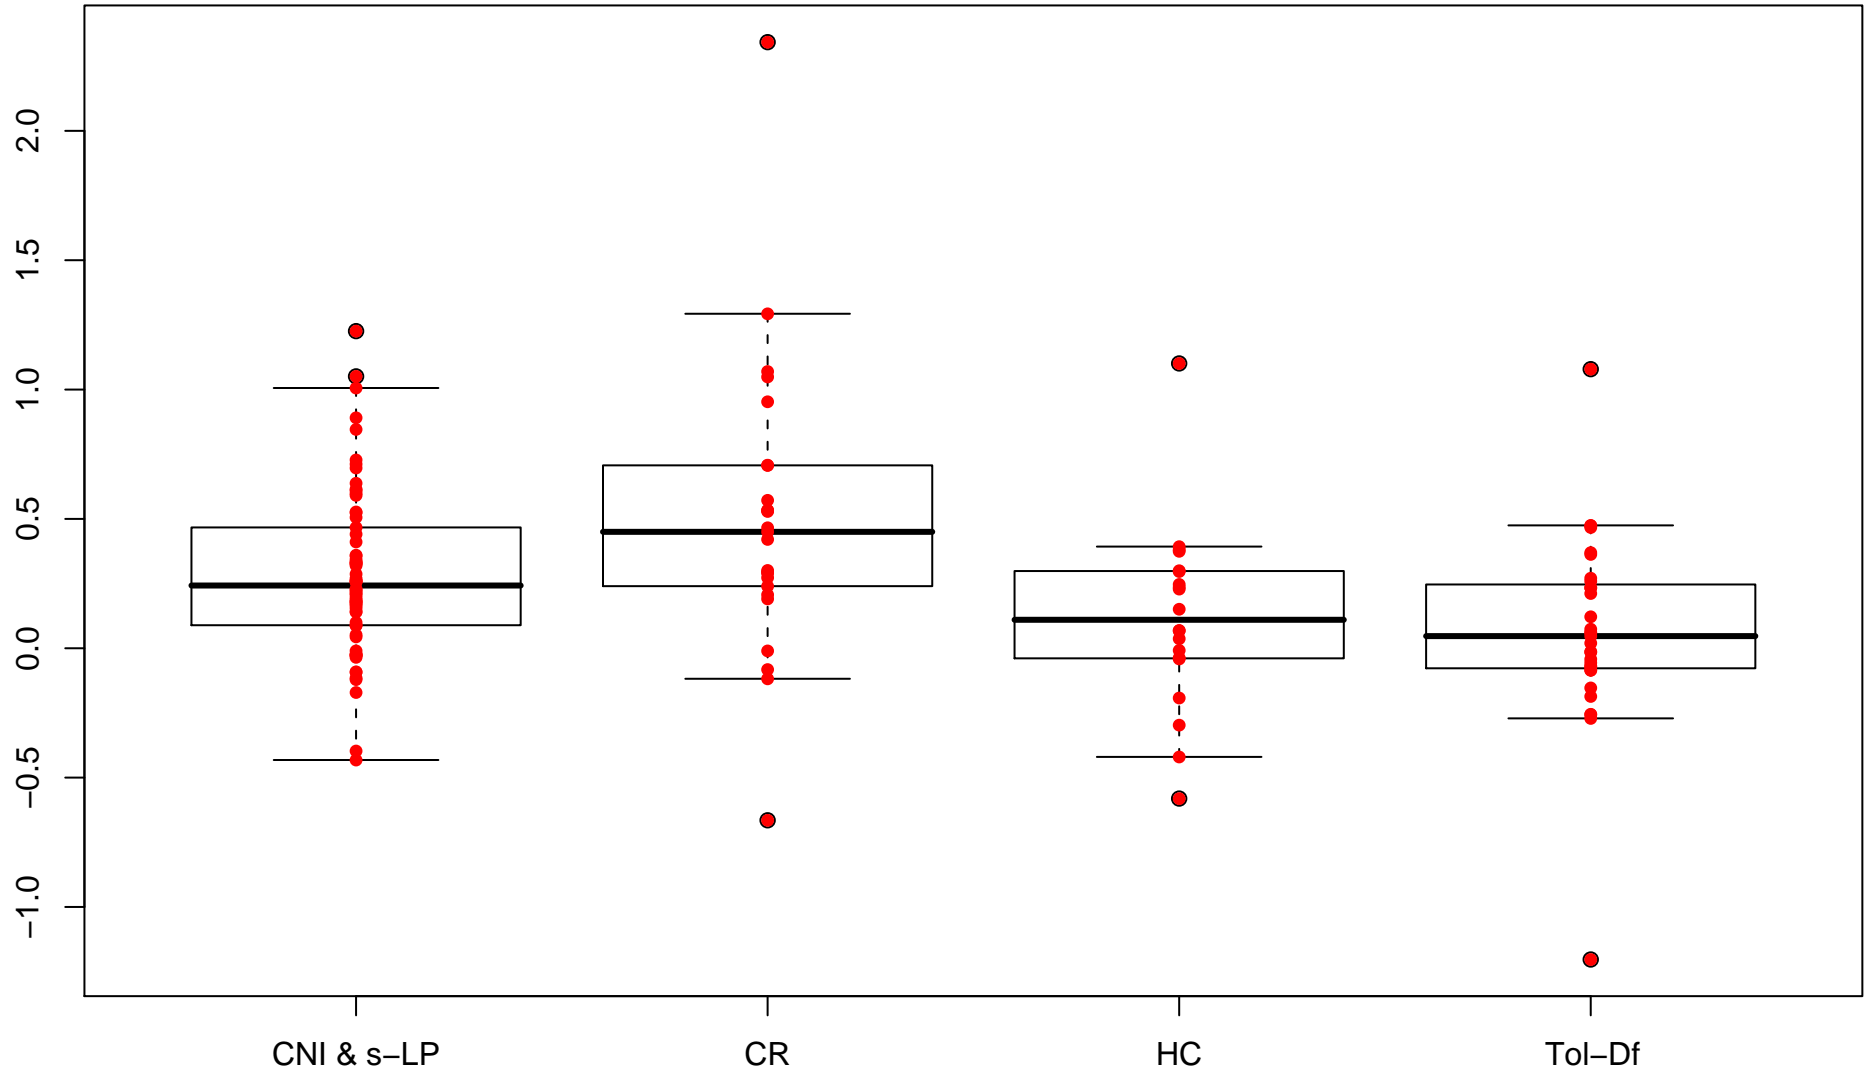

Rank 538 : TMSB4X;TMSL3  
0.00030651

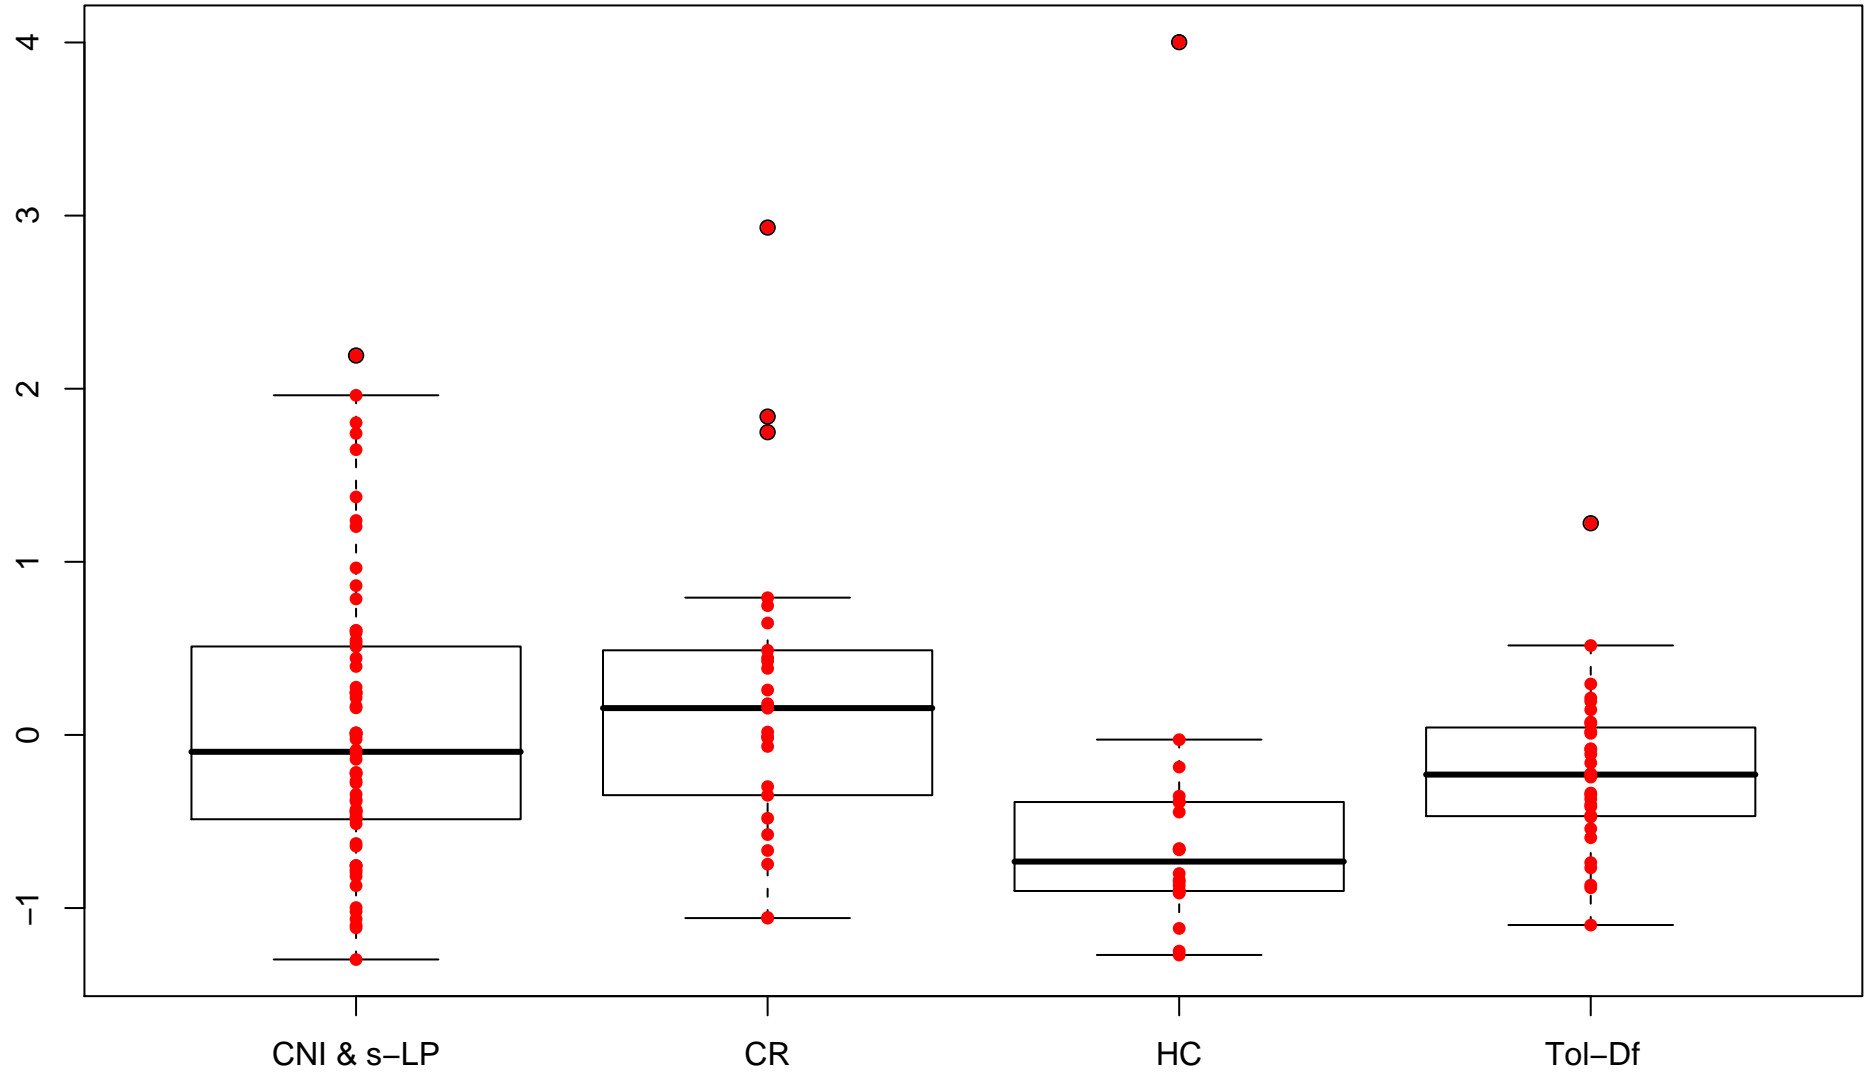

Rank 539 : A\_24\_P297302  
0.00030672

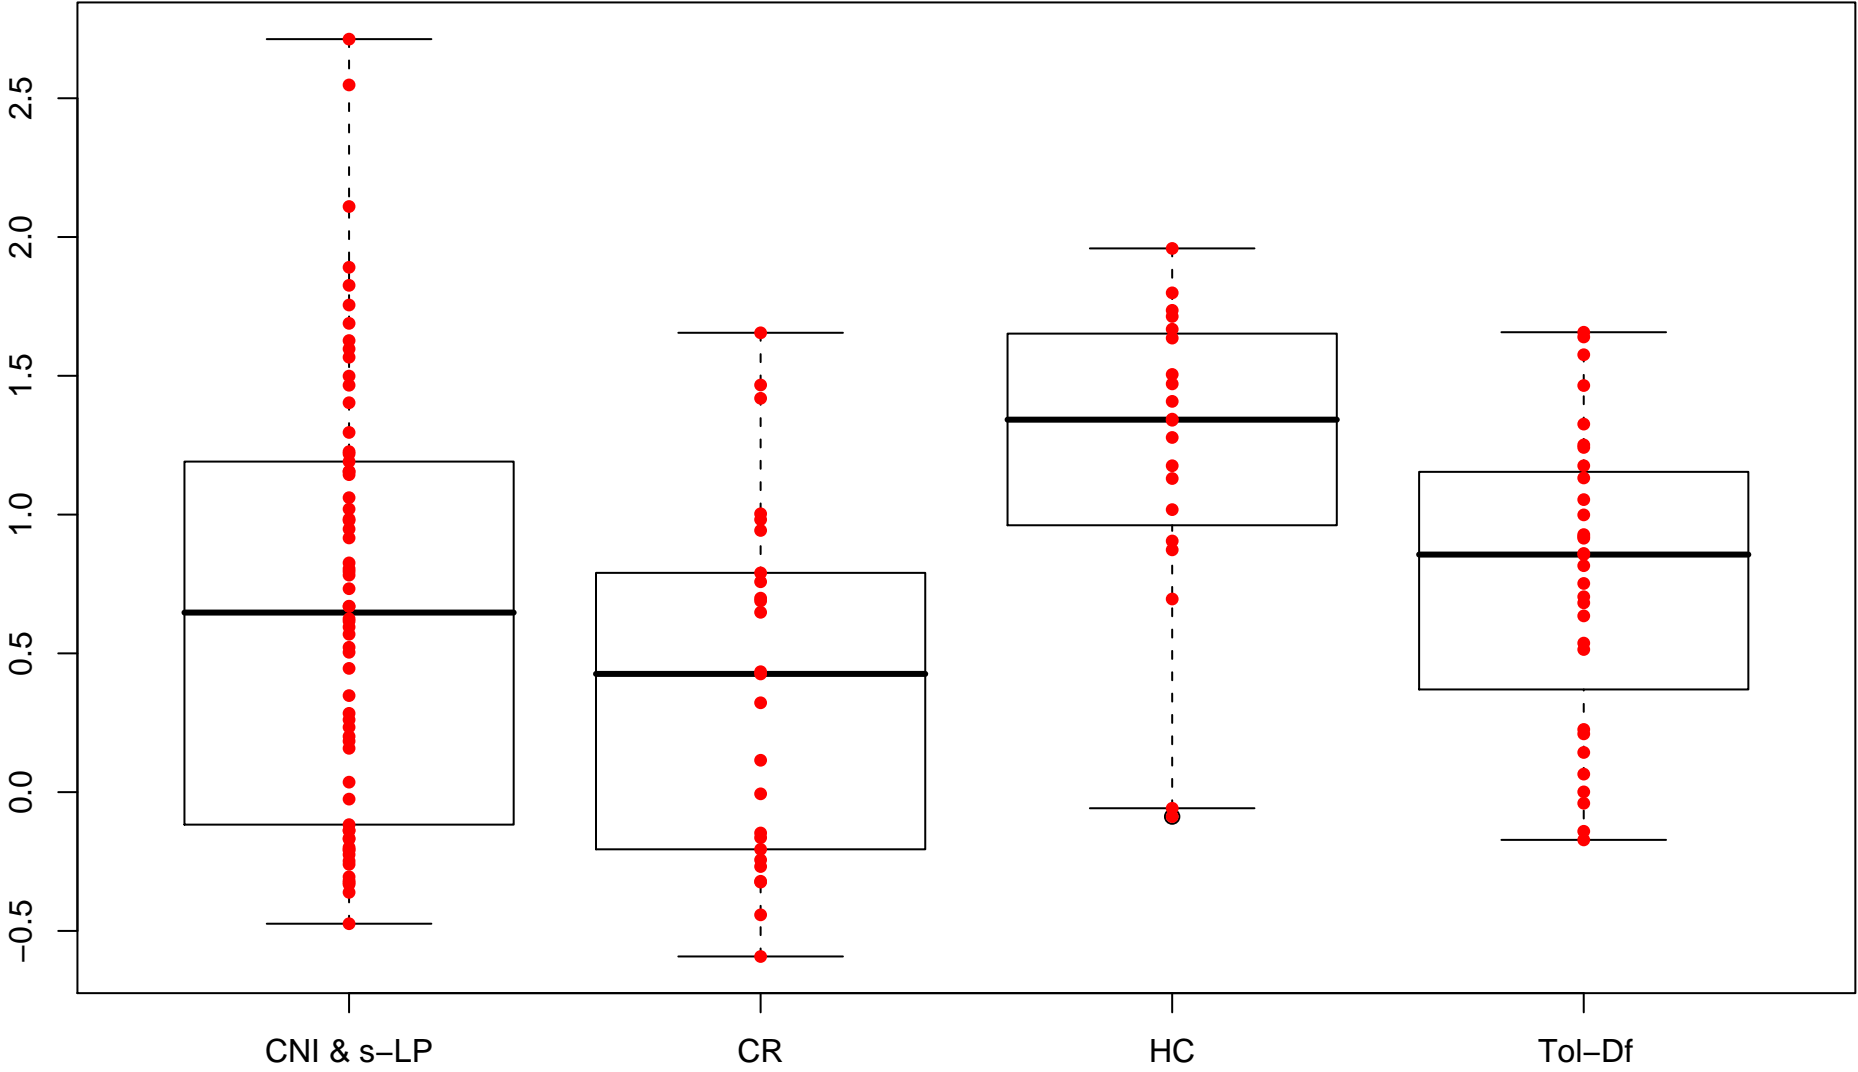

Rank 540 : LTBP3  
0.00030789

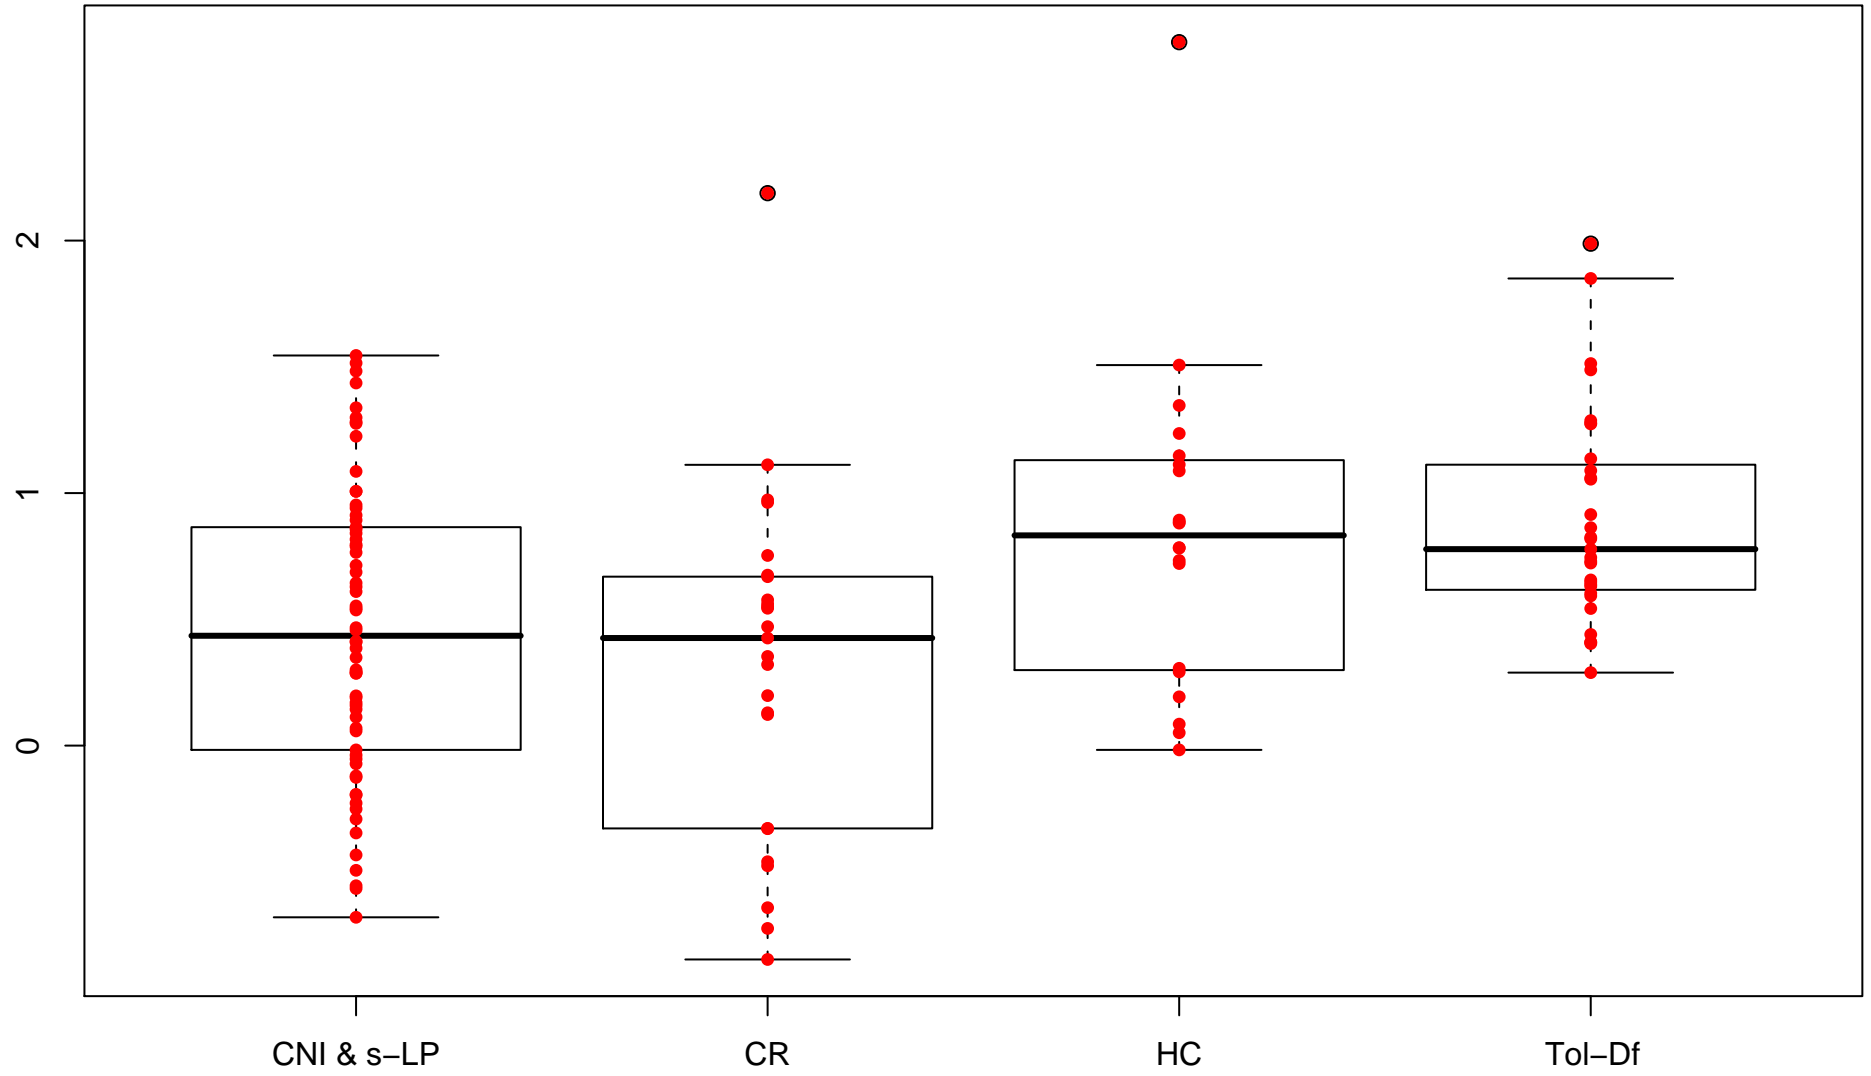

Rank 541 : MNAT1  
0.00031174

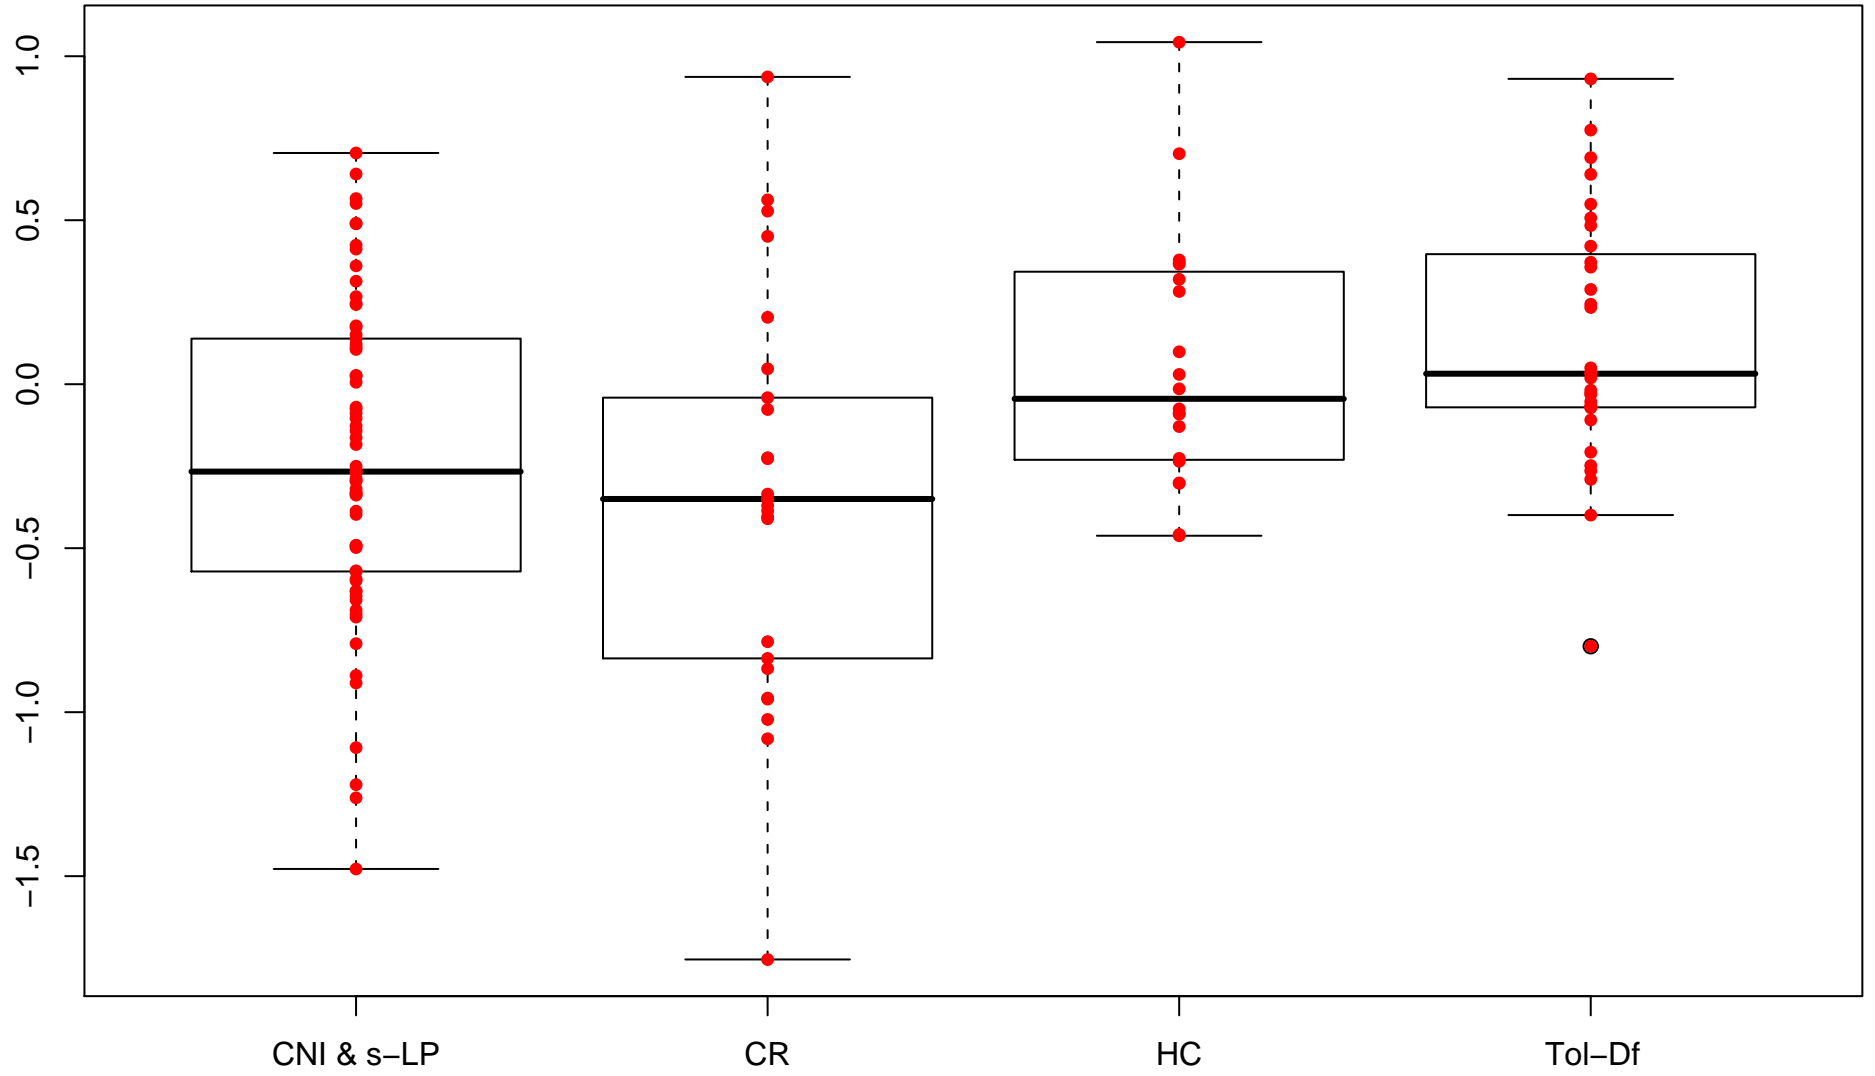

Rank 542 : DNAJC18  
0.00031214

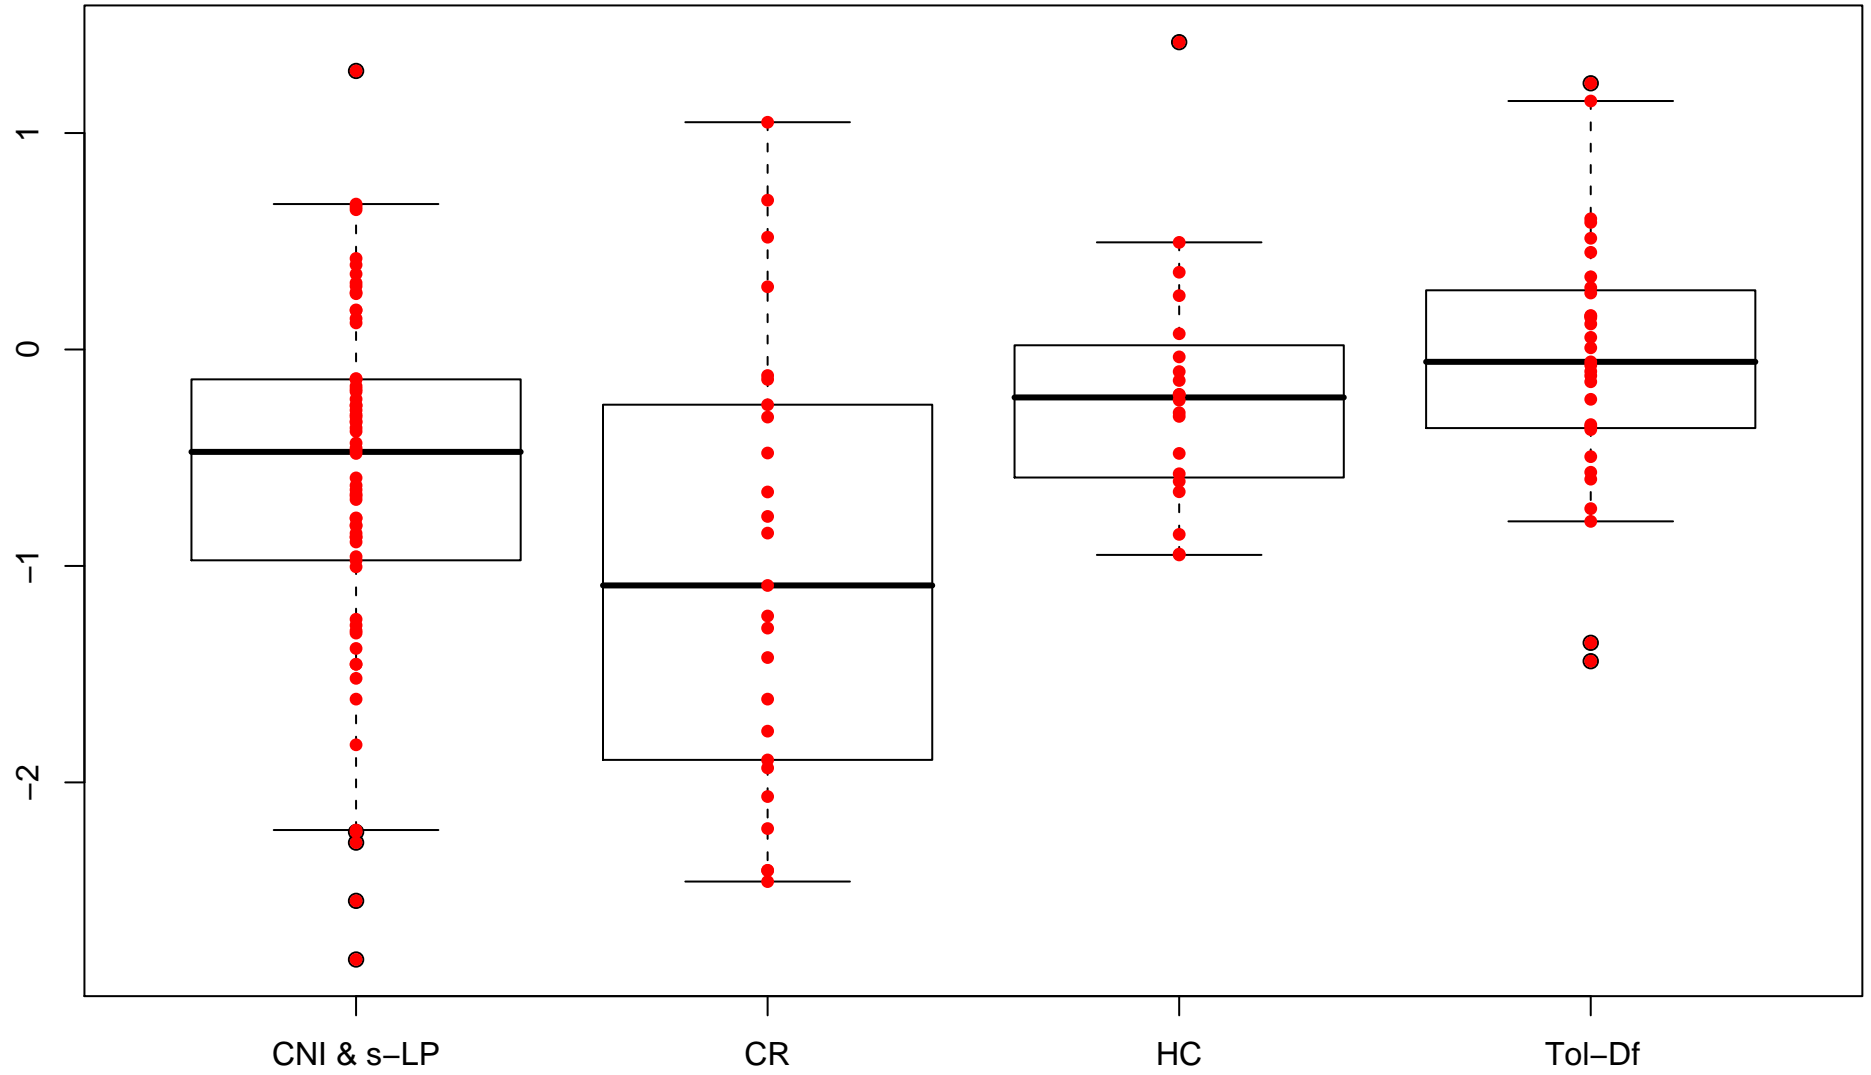

Rank 543 : PRNP  
0.00031266

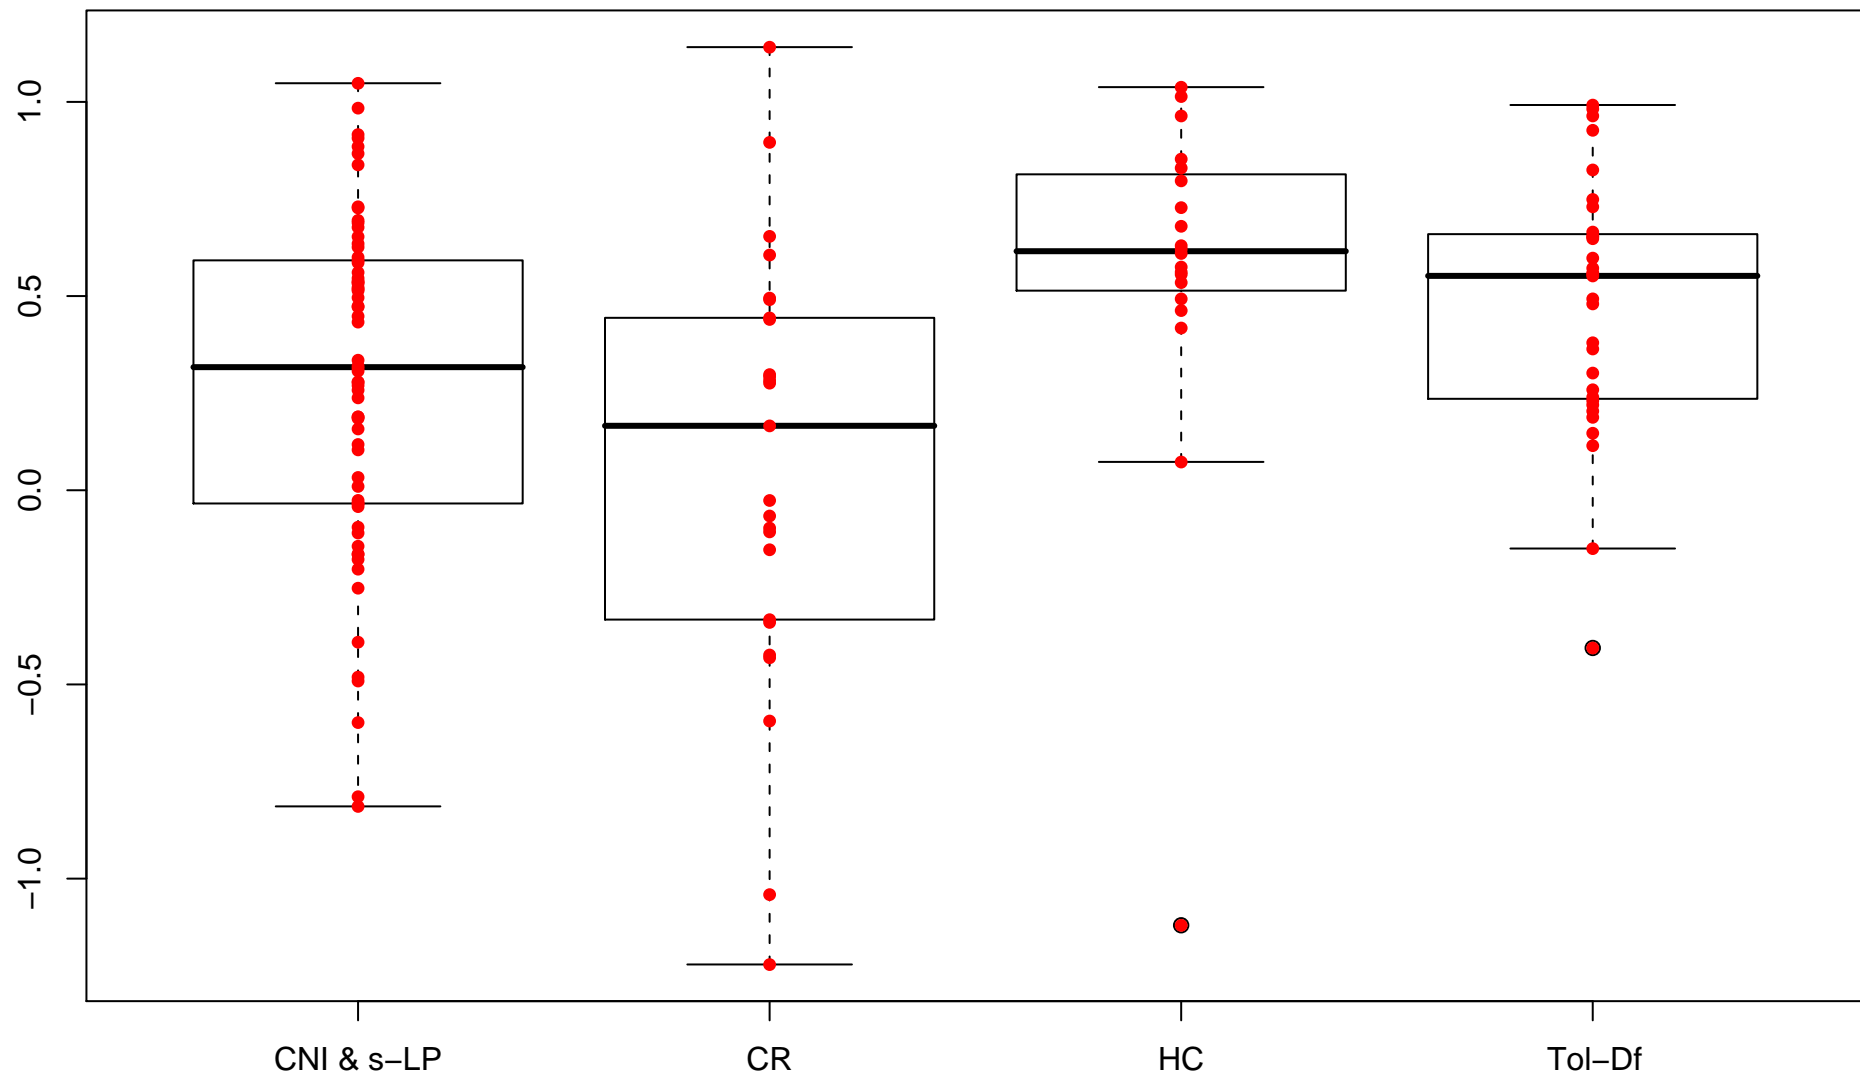



Rank 544 : BCL2  
0.00031271

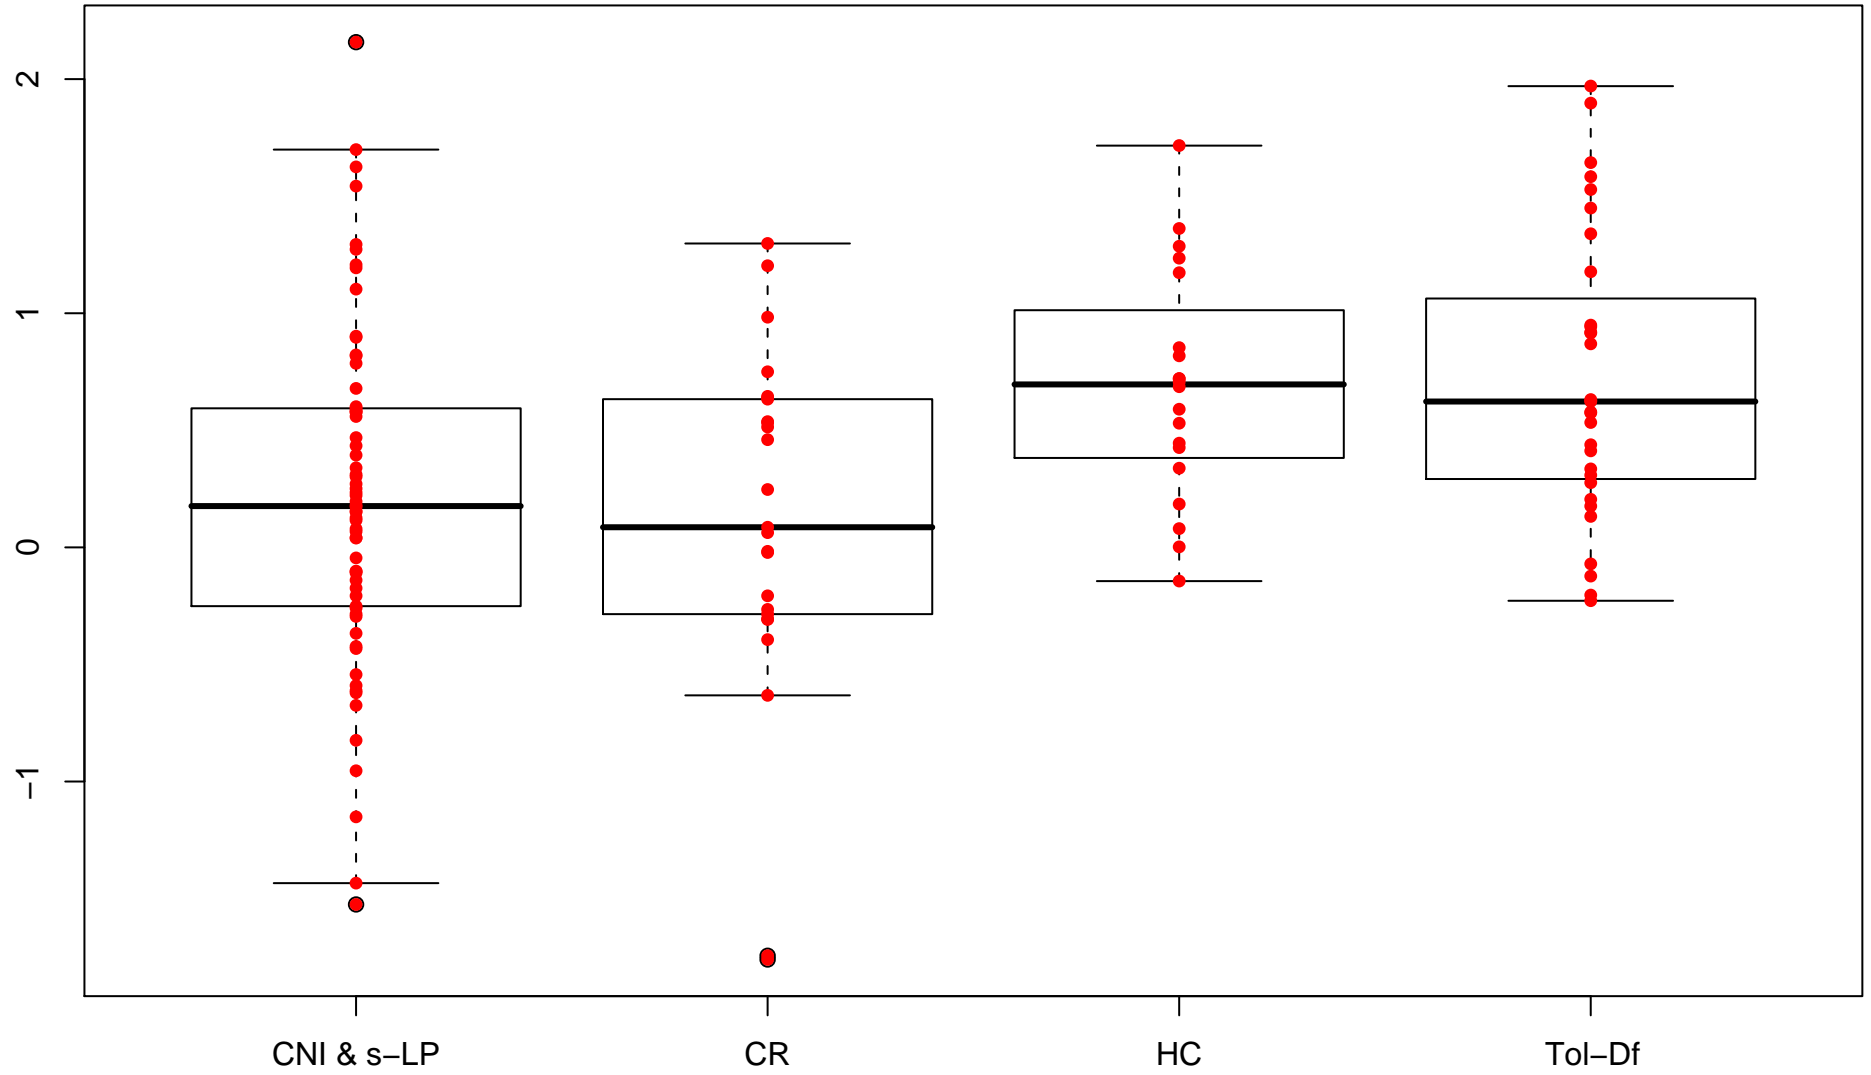

Rank 545 : IL1R2  
0.0003134

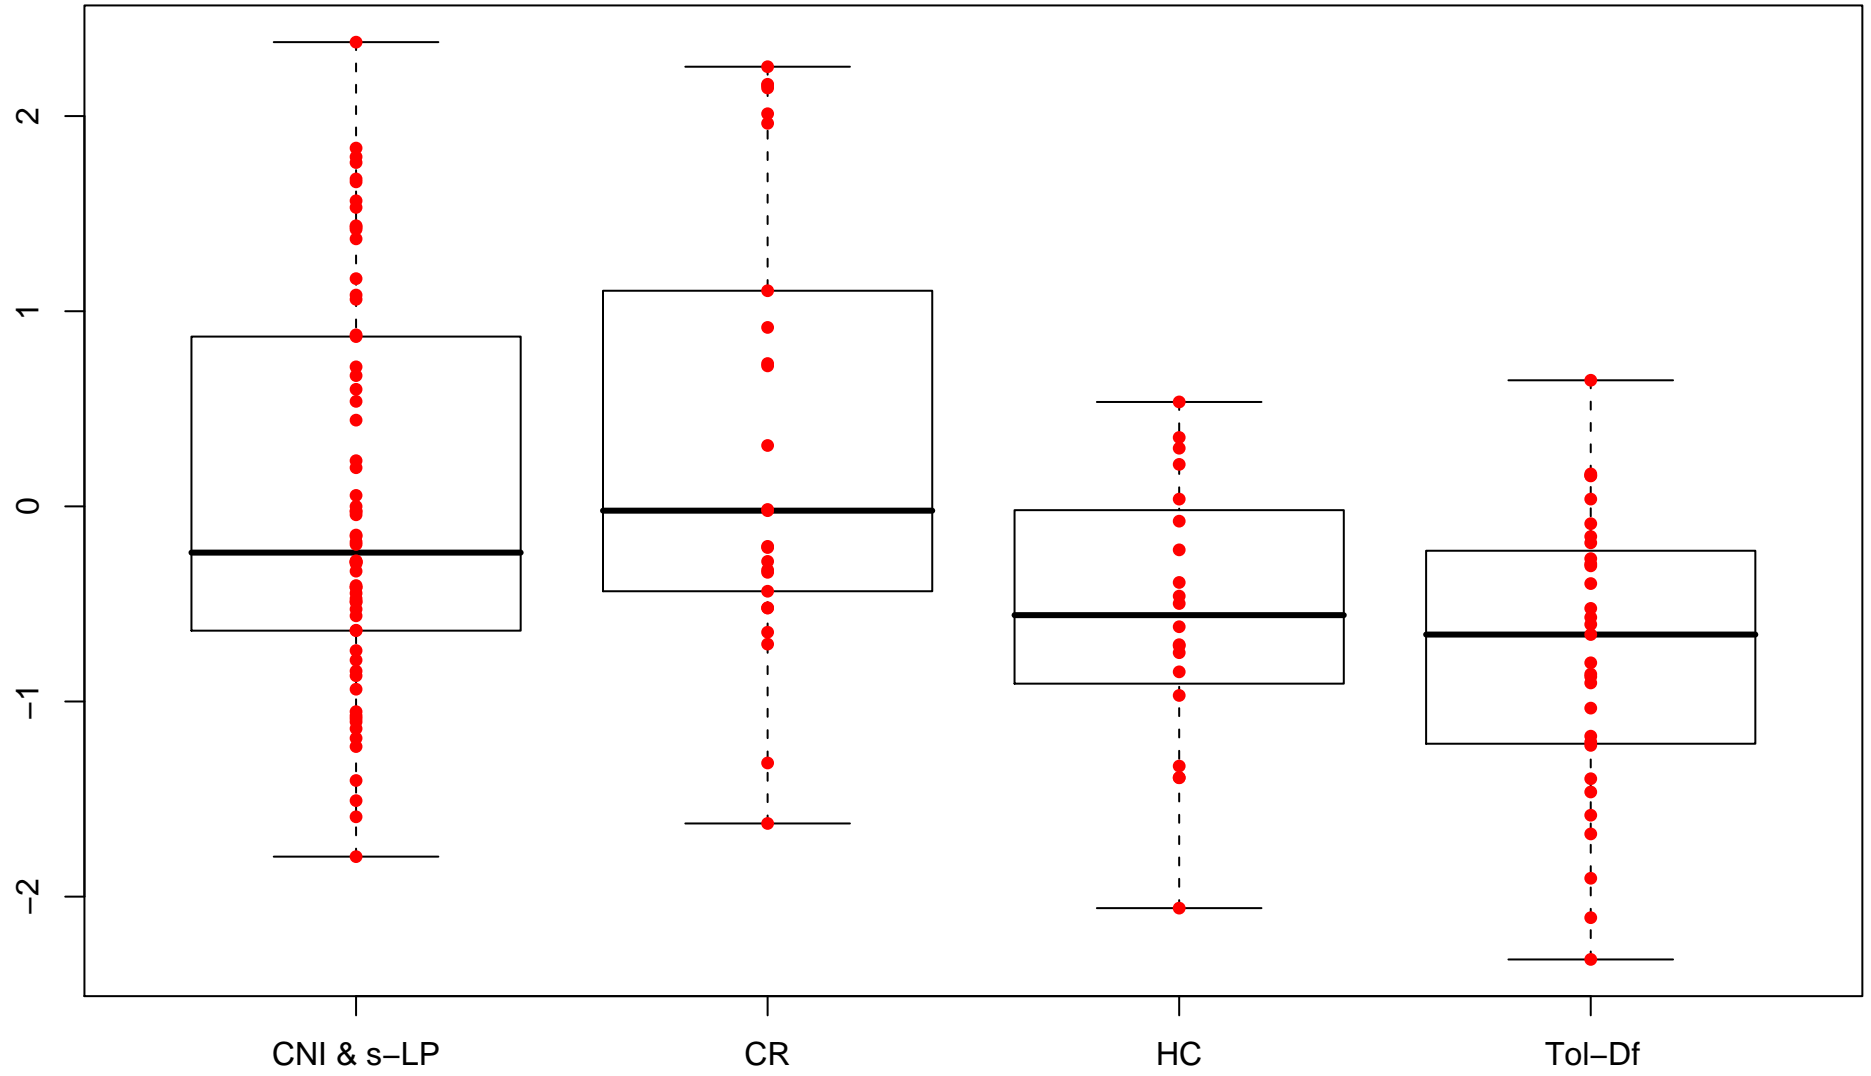

Rank 546 : ARHGEF12  
0.00031605

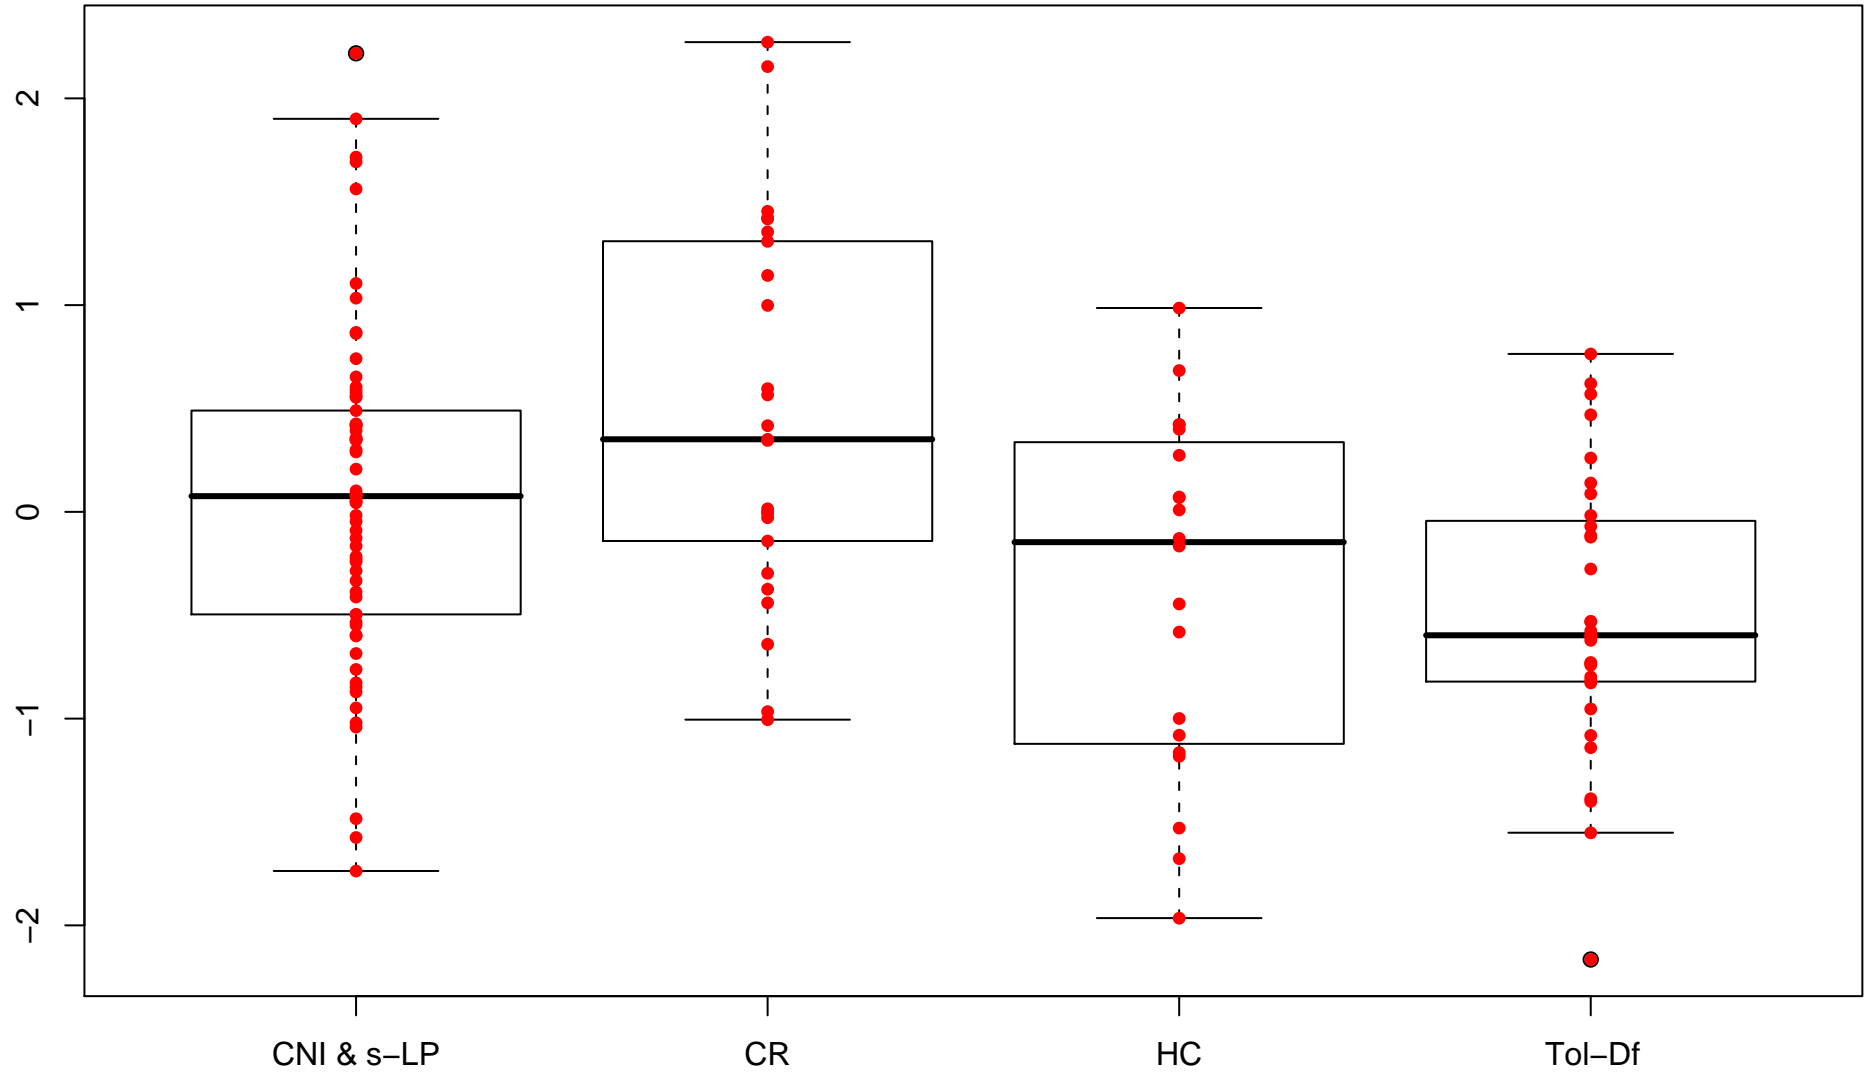

Rank 547 : SRRD;TFIP11  
0.0003176

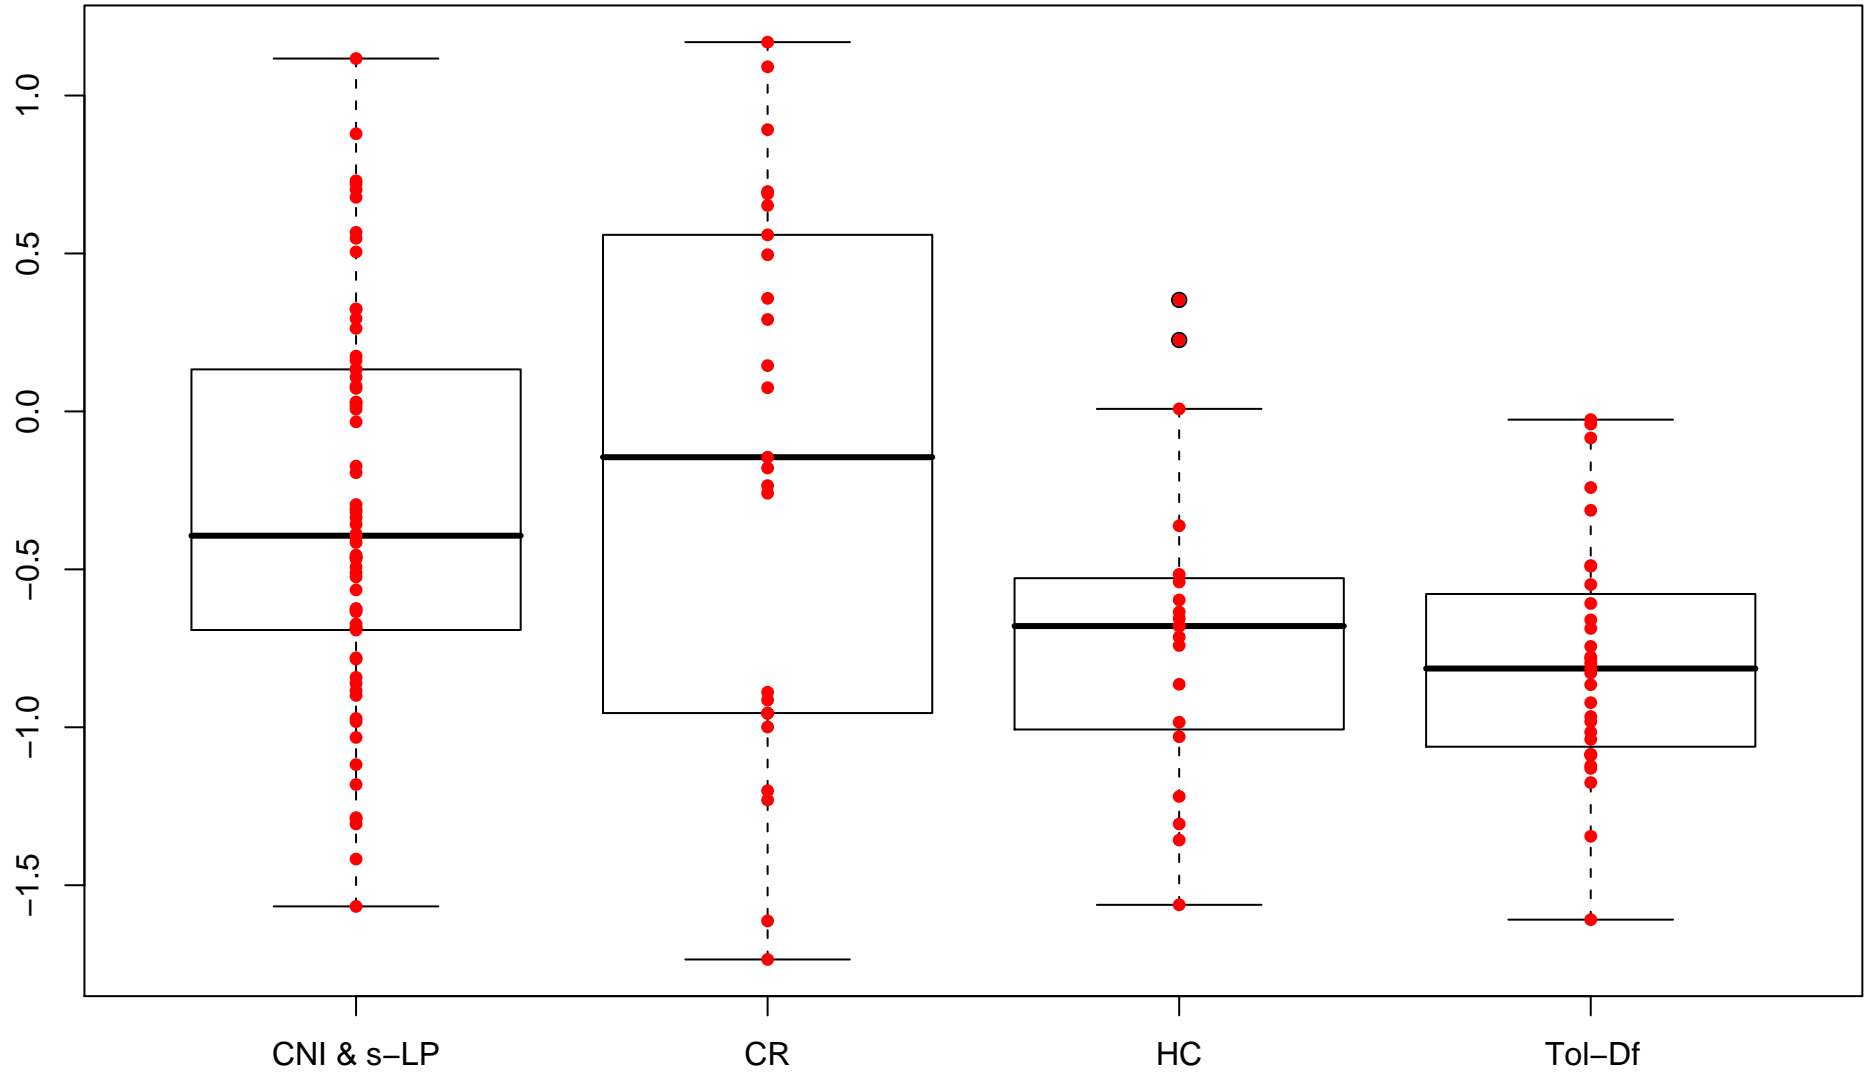

Rank 548 : RASGEF1A  
0.00032

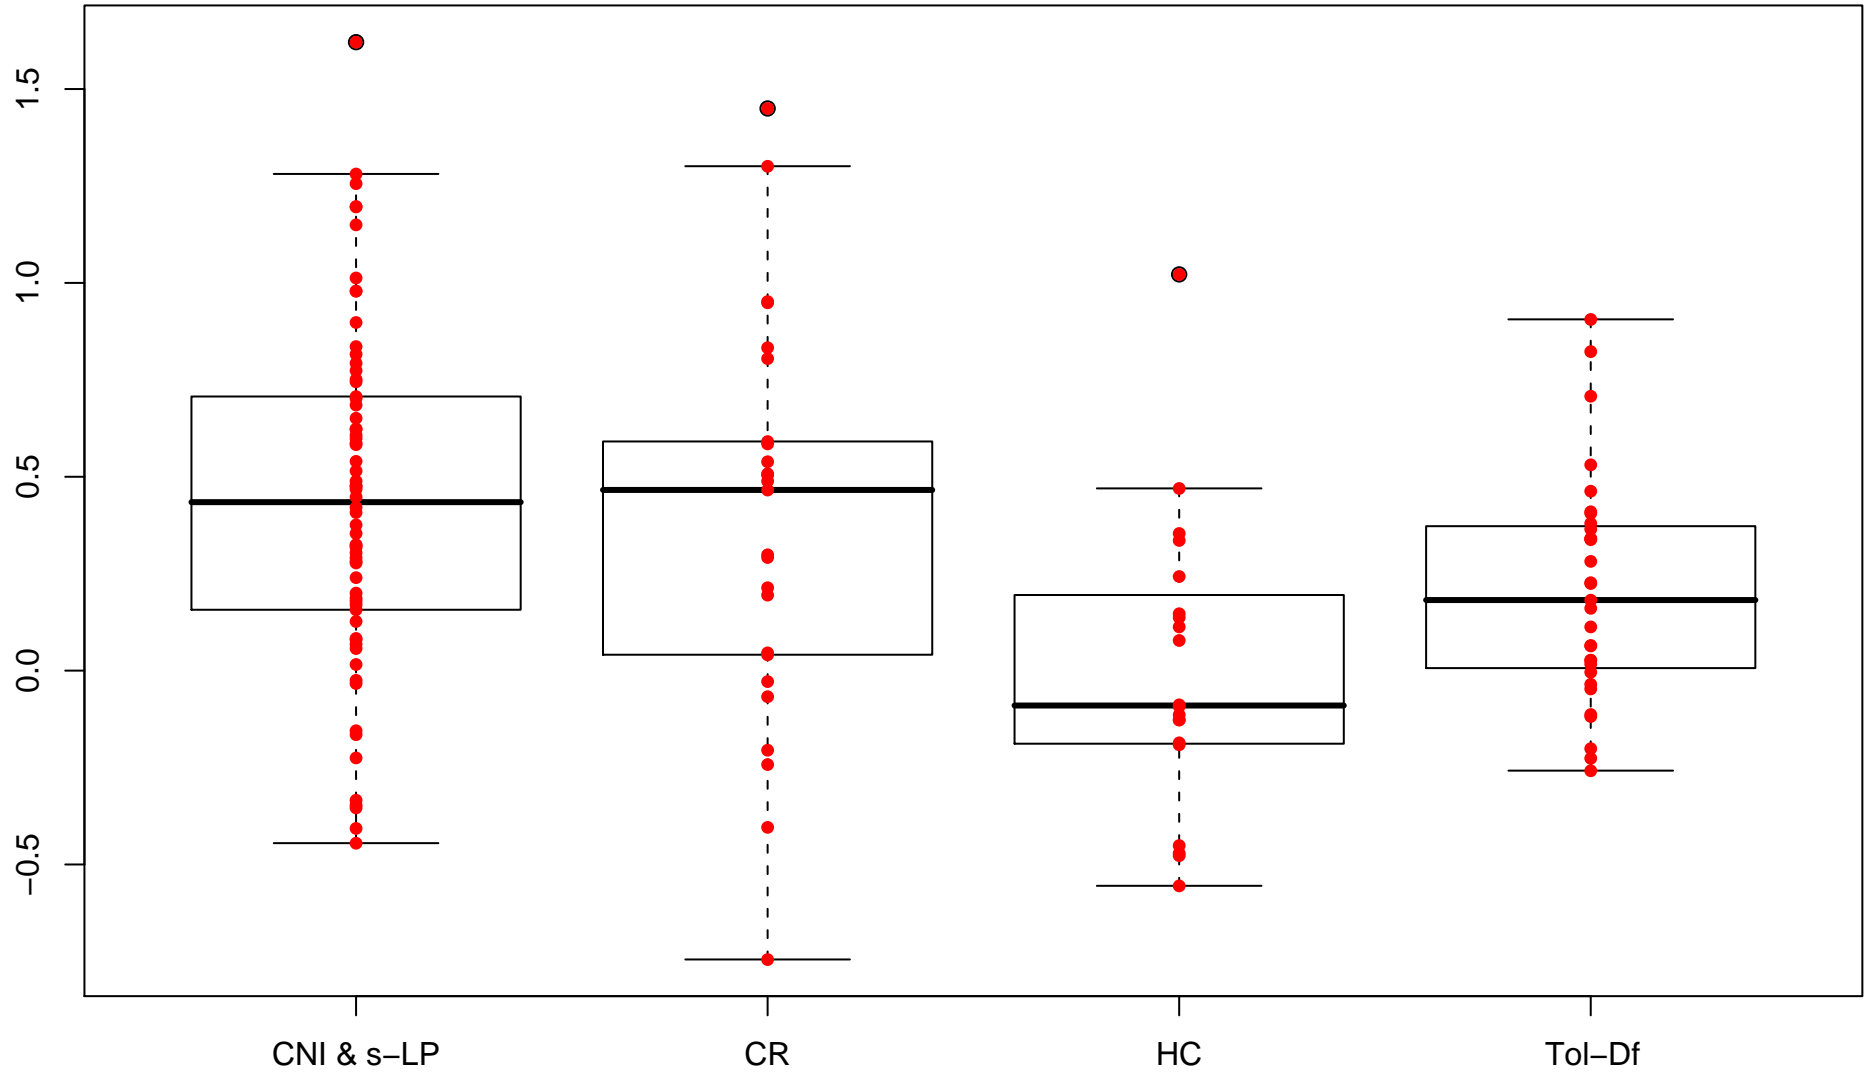

Rank 549 : GPRASP1  
0.0003217

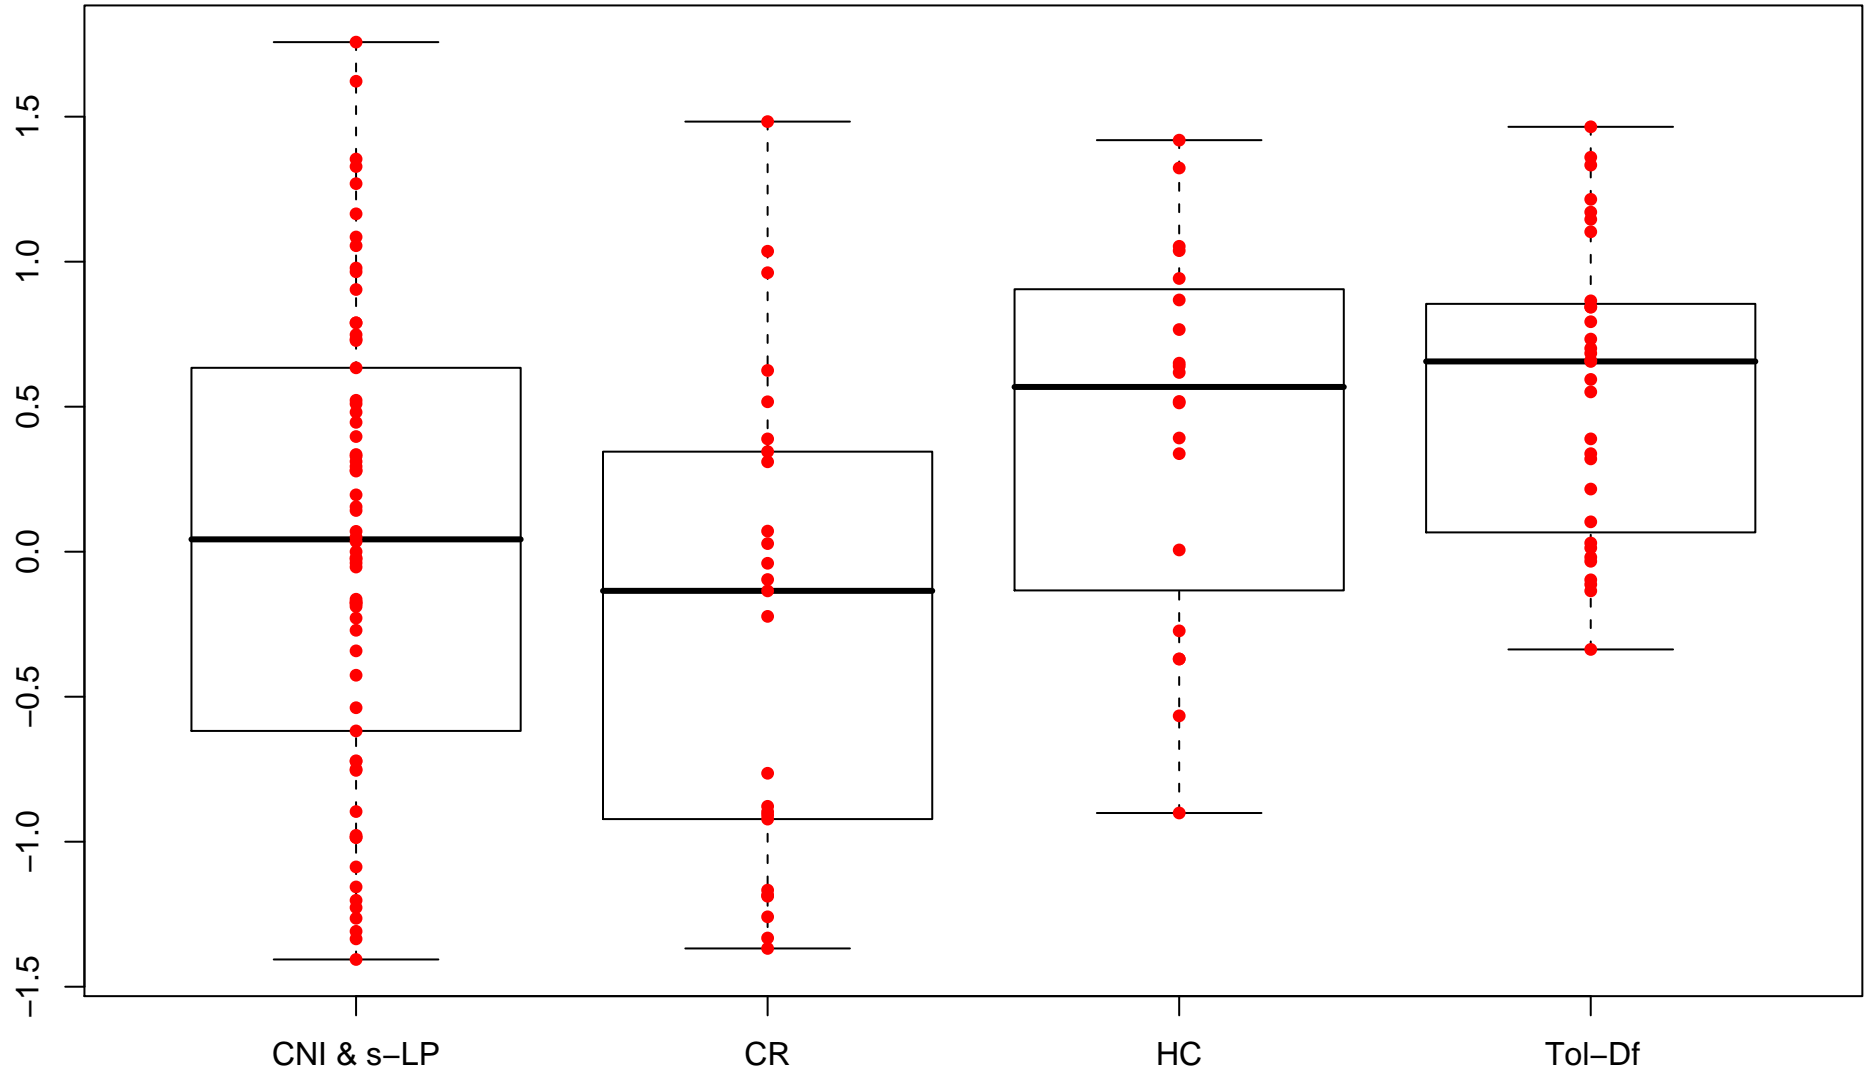

Rank 550 : UCP3  
0.0003223

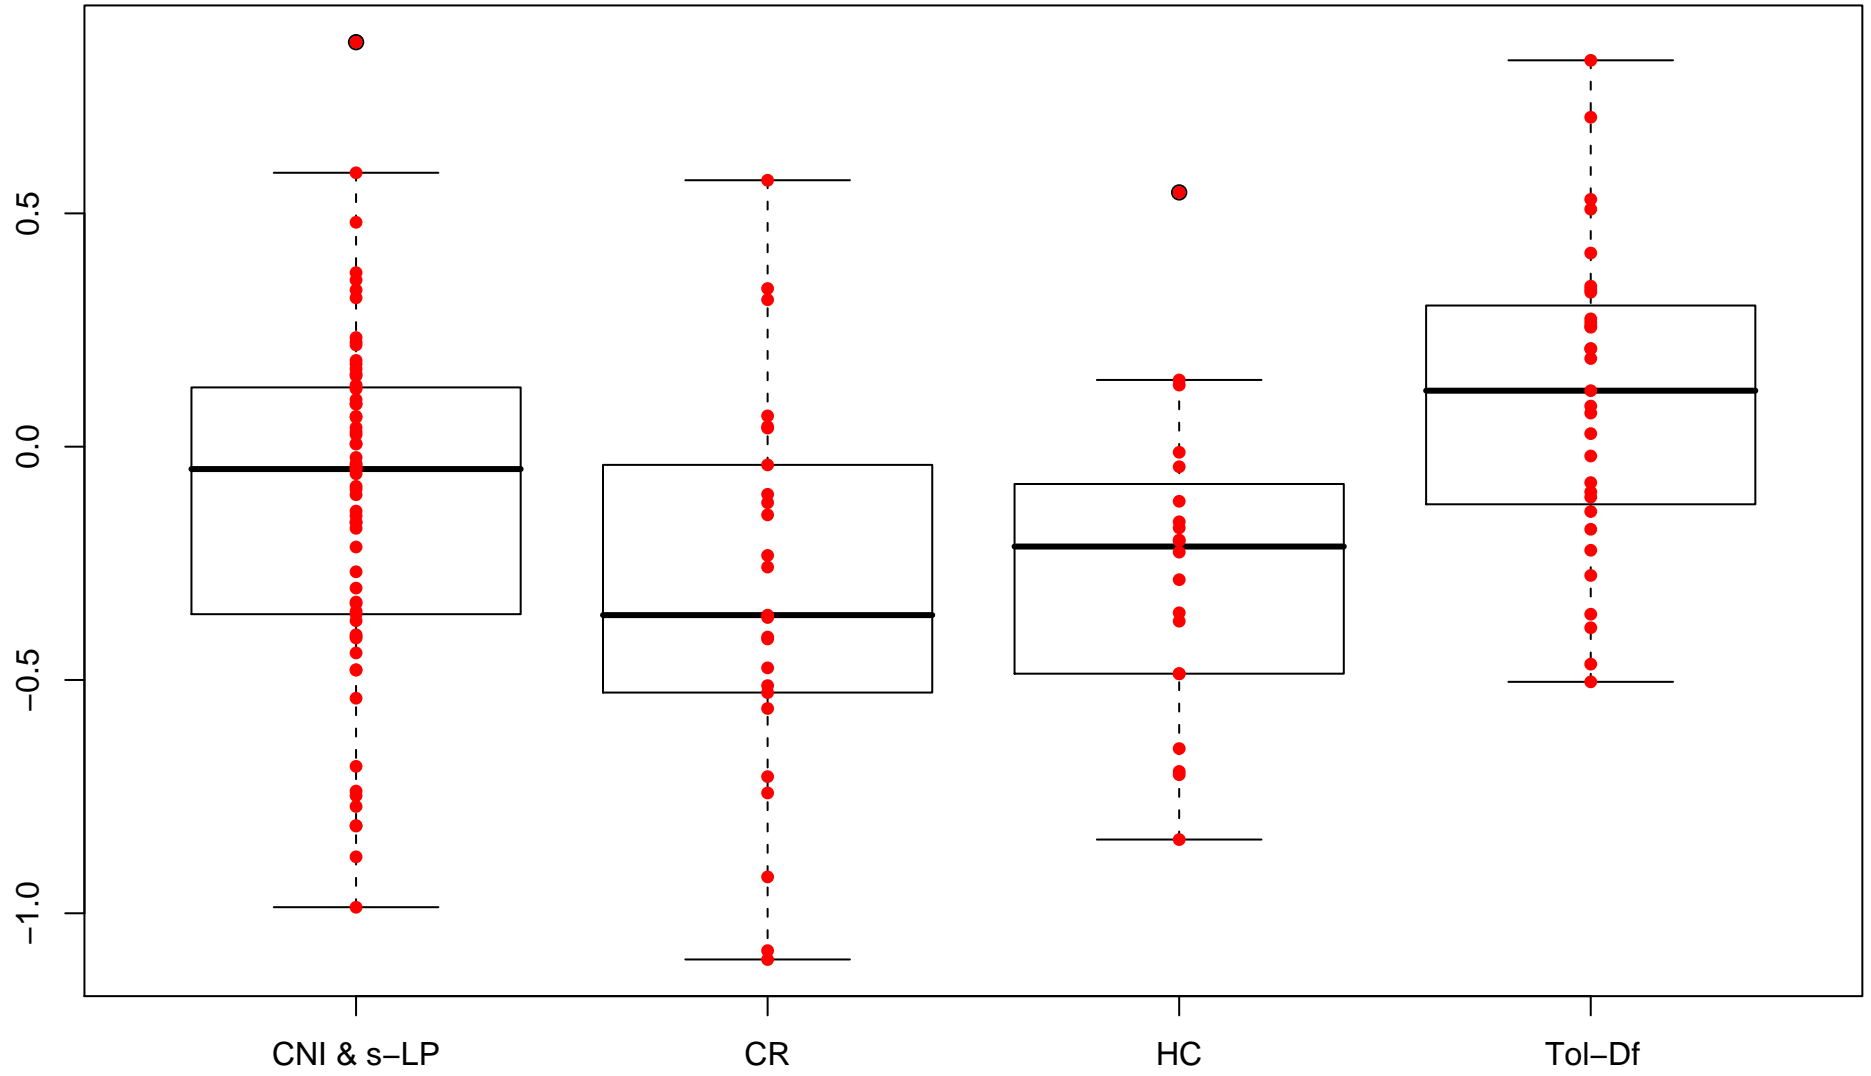

Rank 551 : GNAQ  
0.0003251

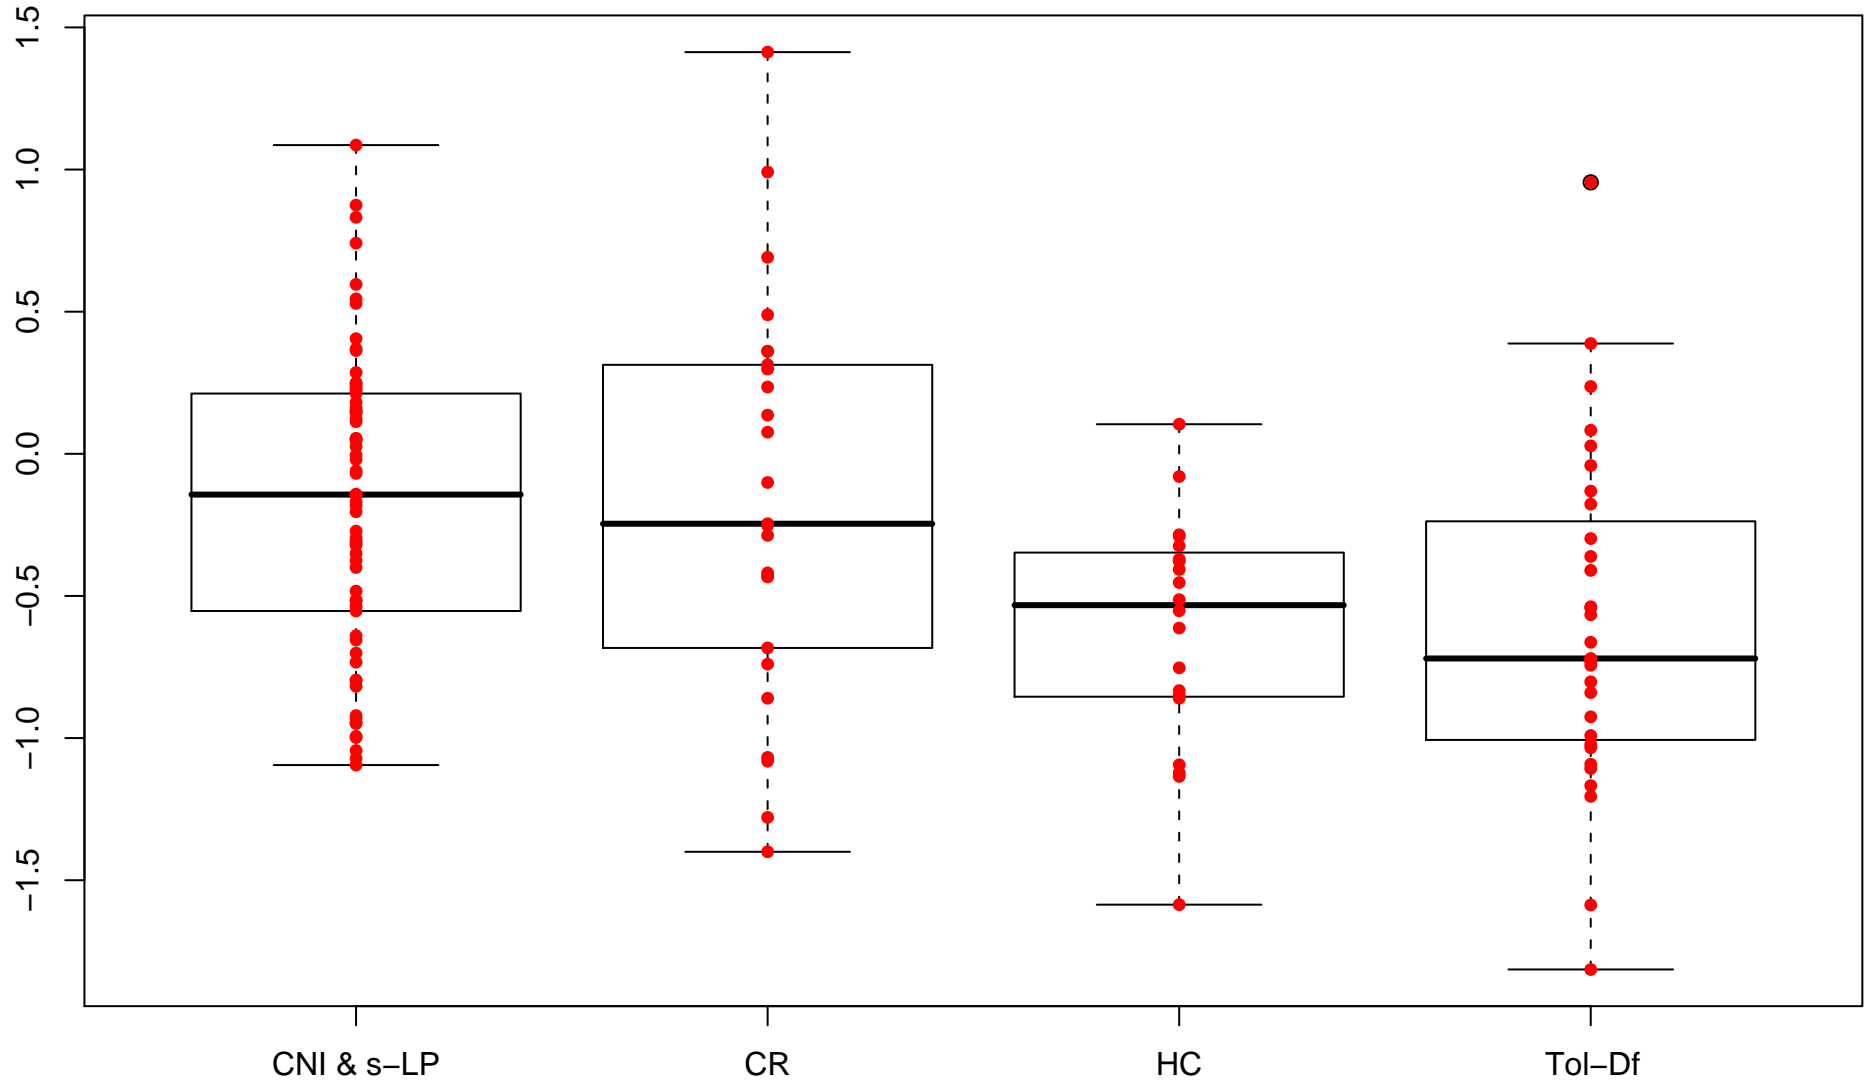



Rank 552 : DHX8  
0.000335

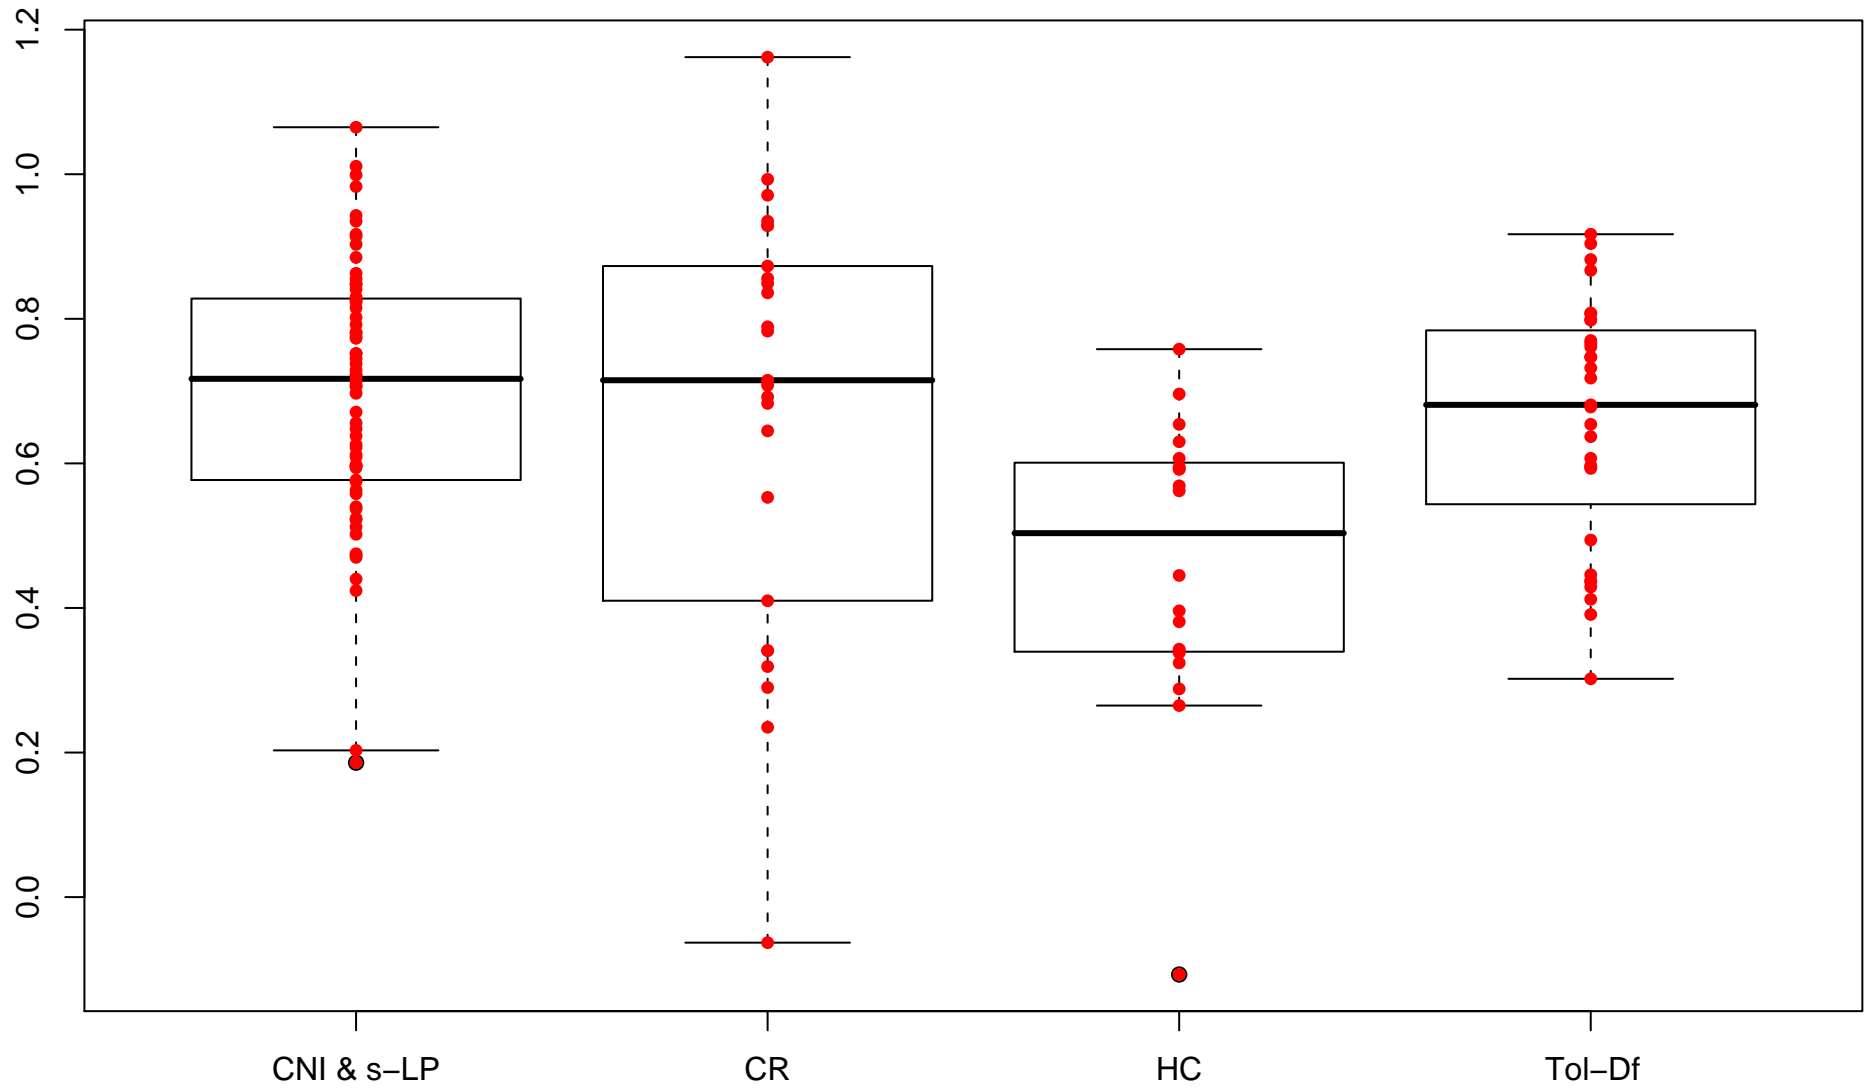

Rank 553 : FAM29A  
0.0003363

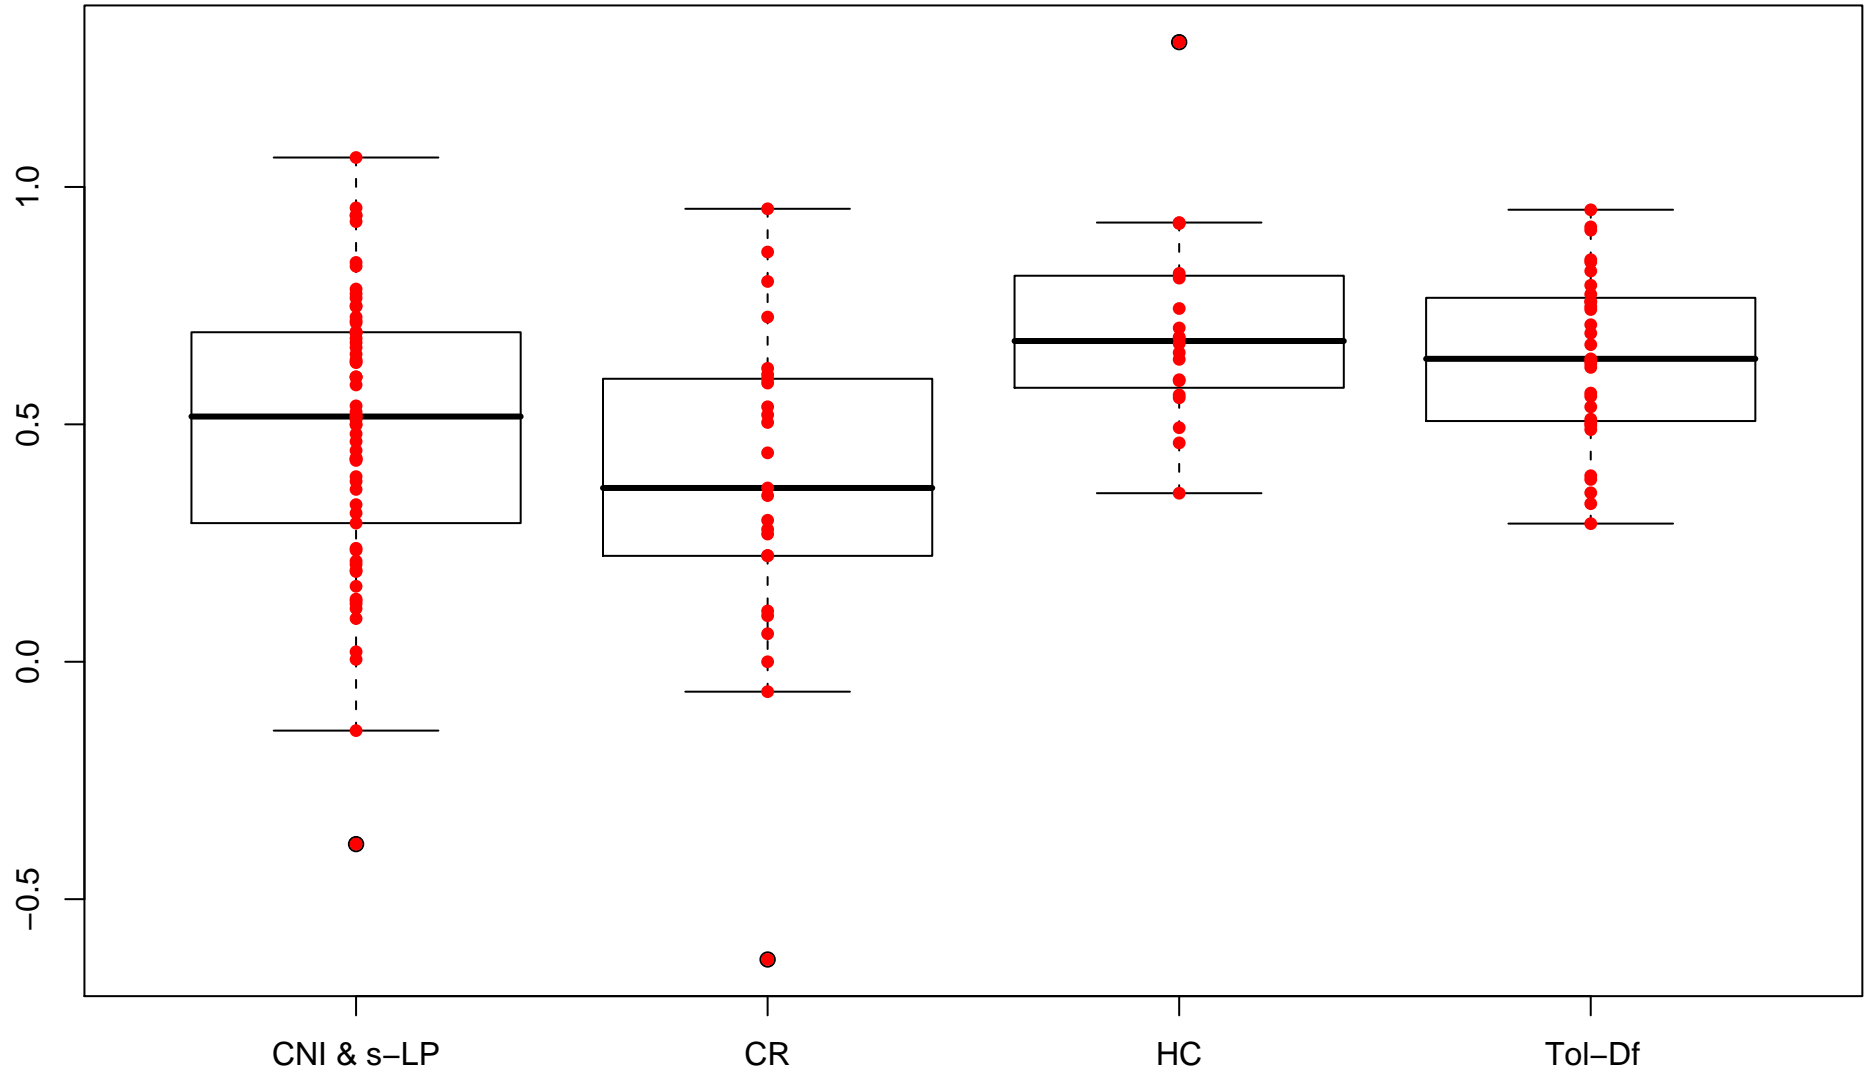

Rank 554 : ABCA1  
0.0003364

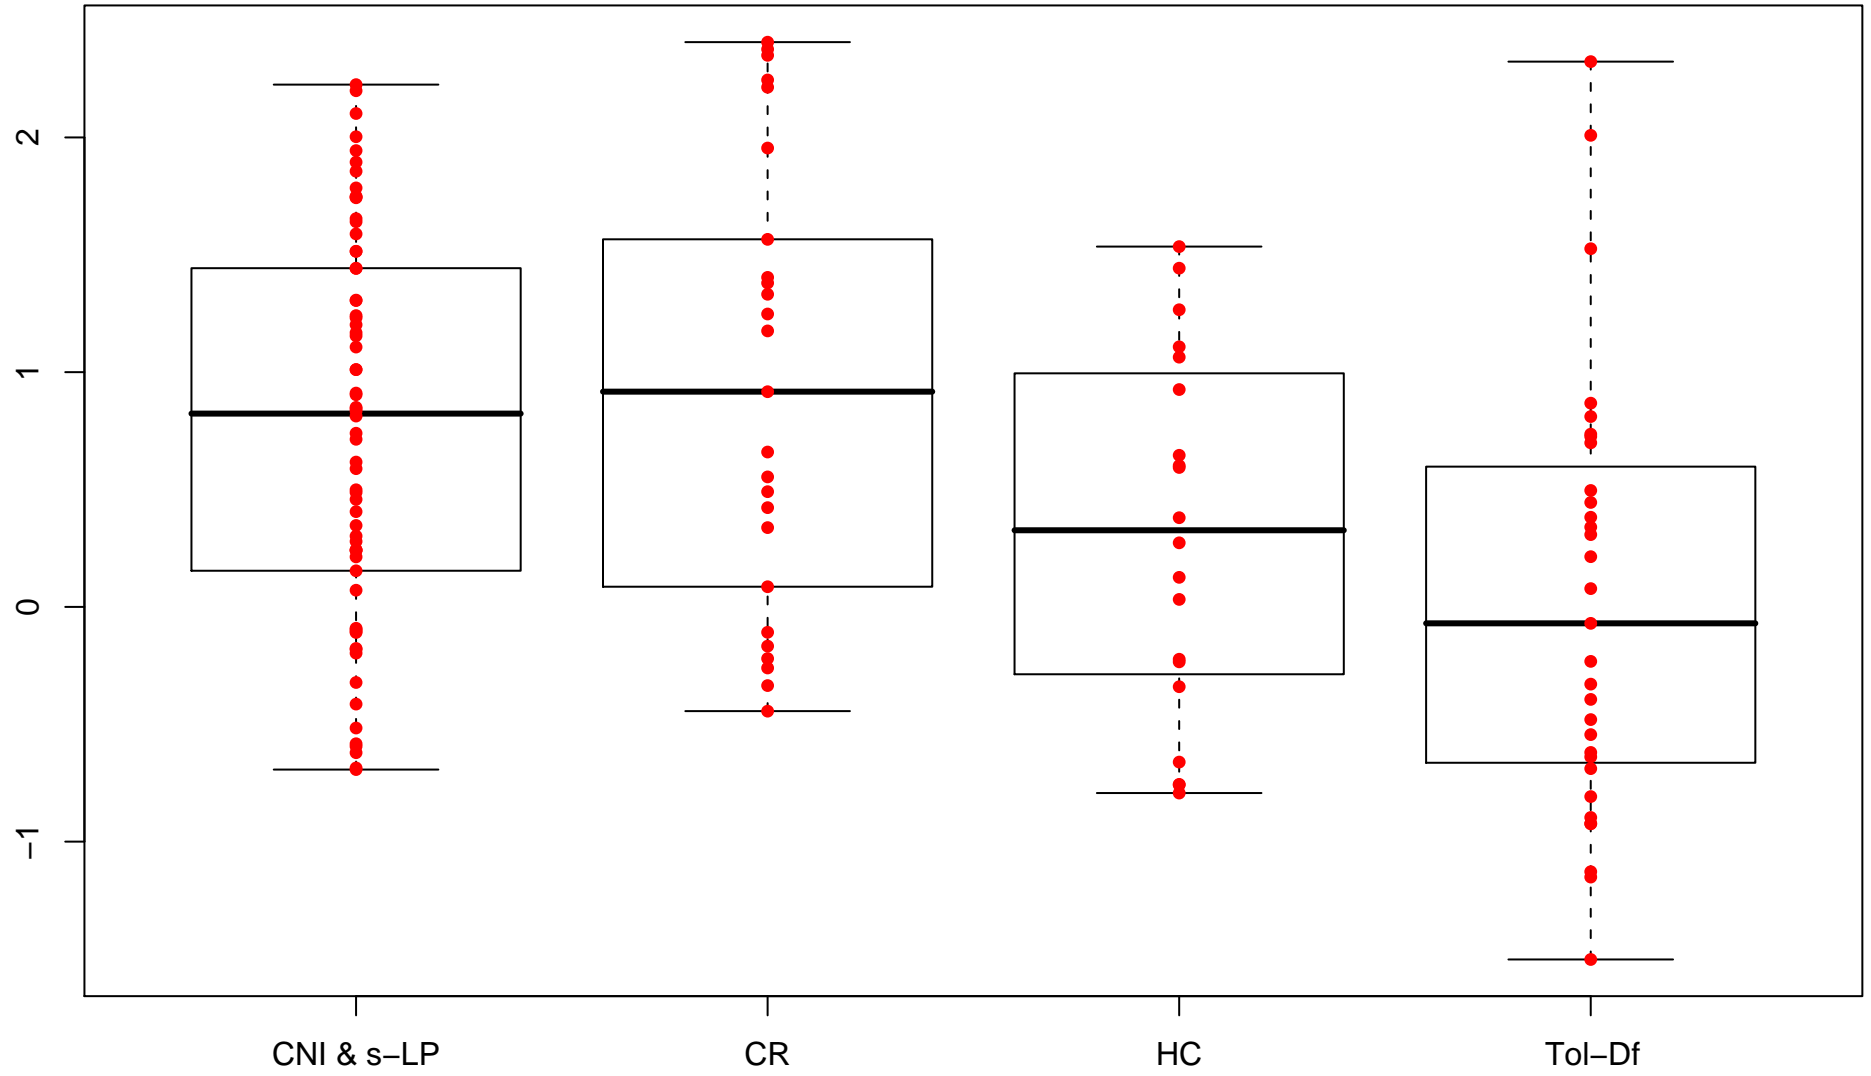

Rank 555 : PCM1  
0.0003406

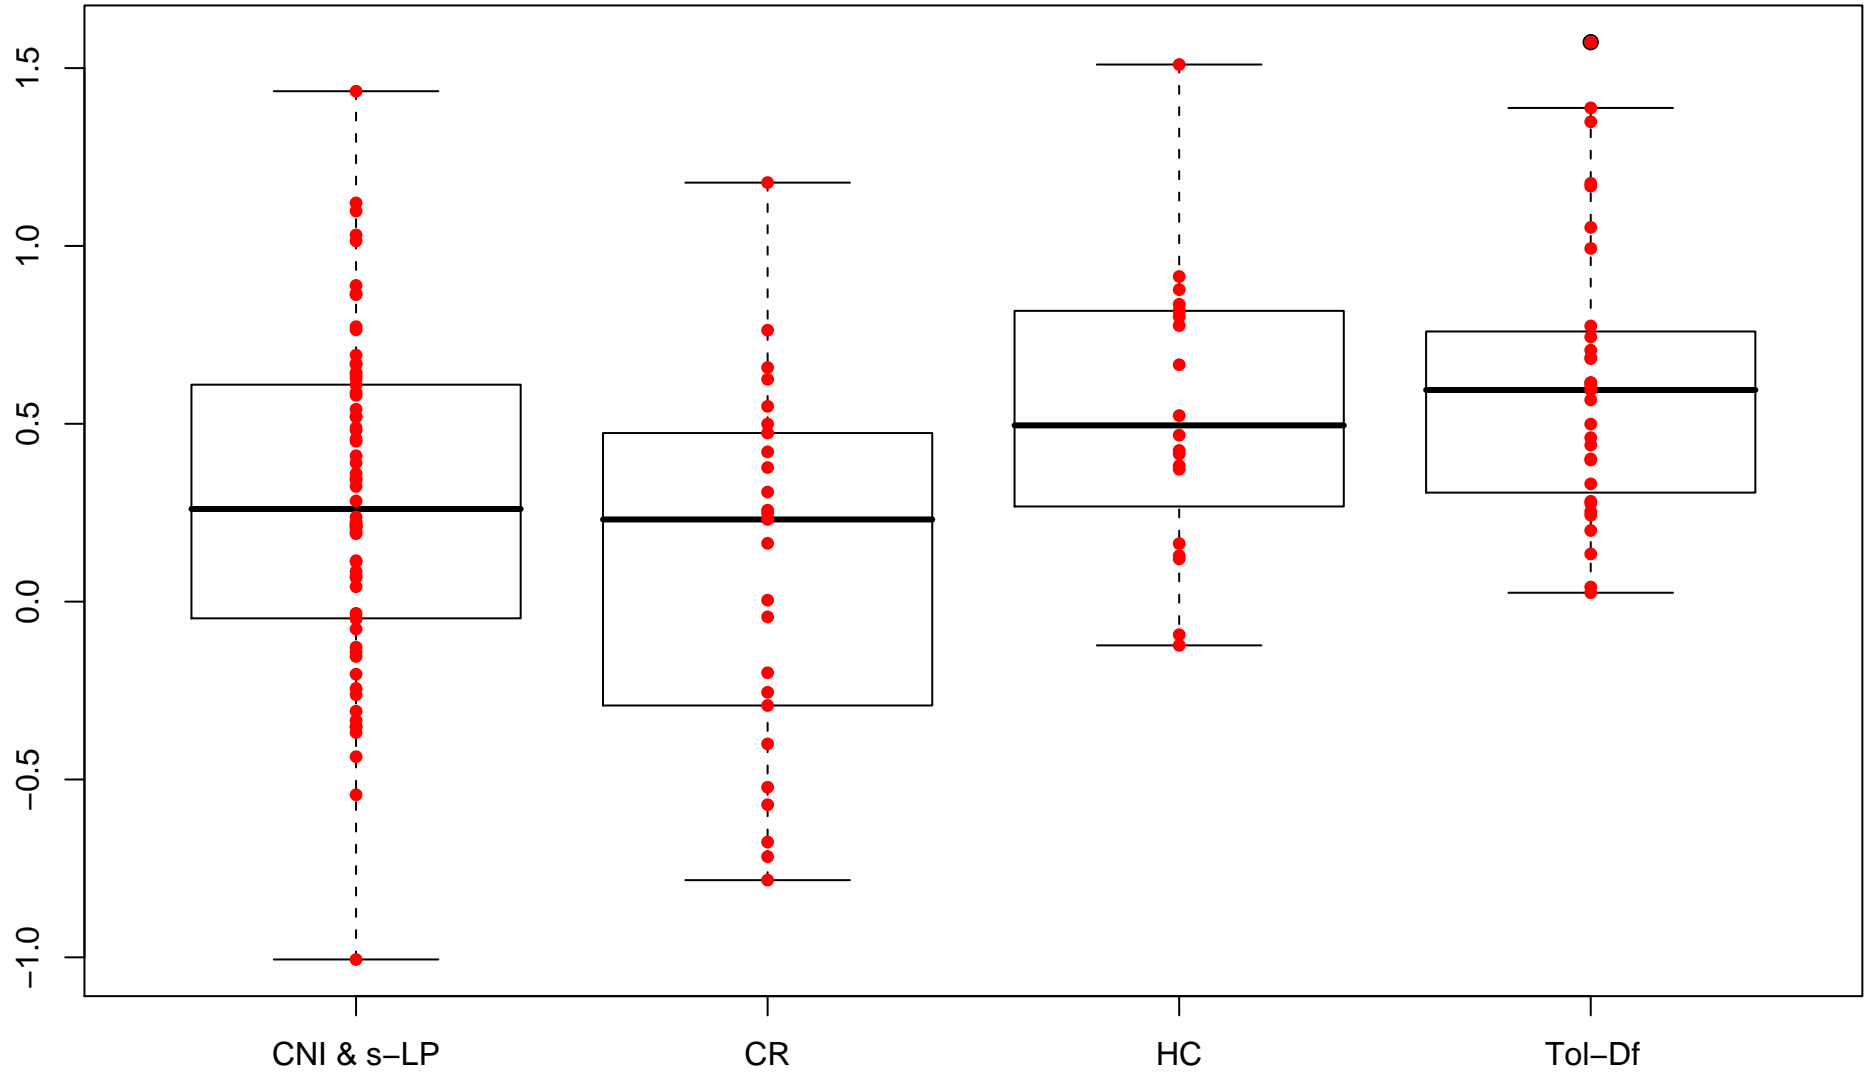

Rank 556 : TBCD  
0.0003406

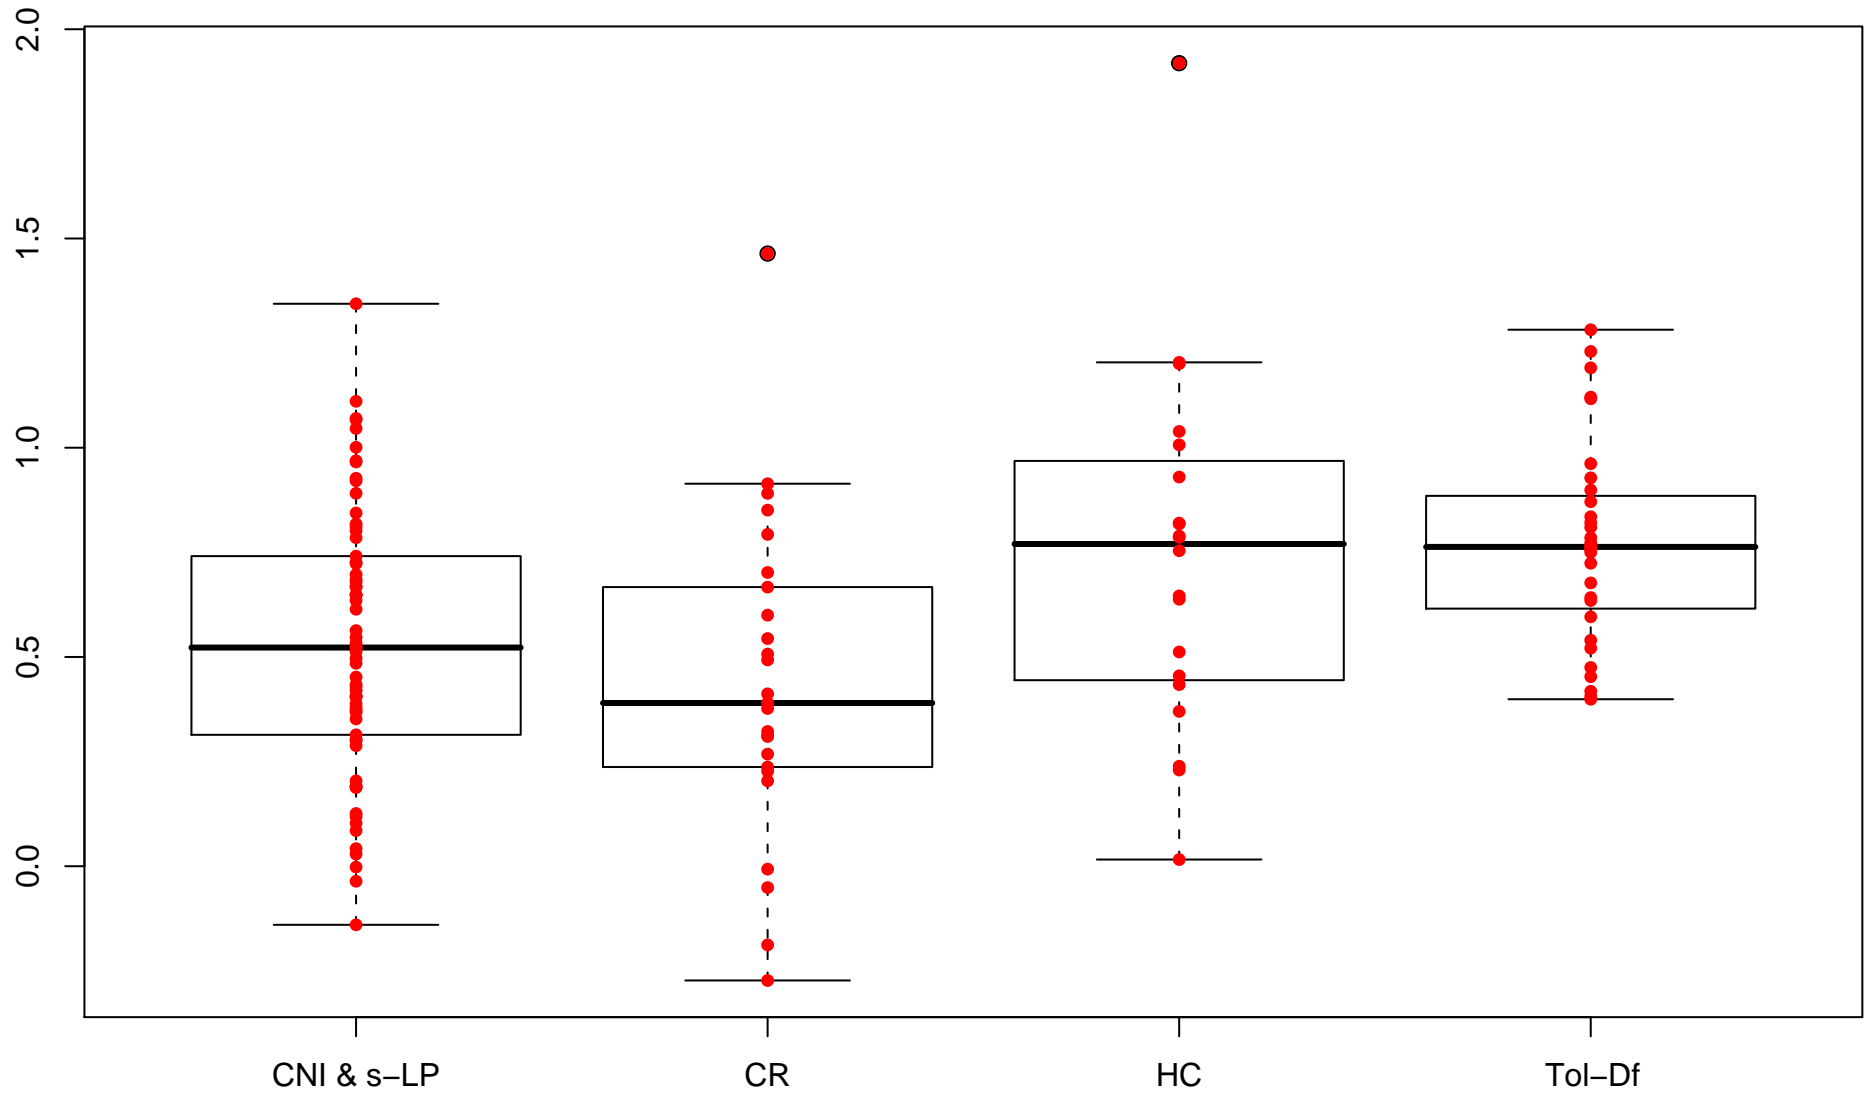

Rank 557 : AGMAT  
0.0003439

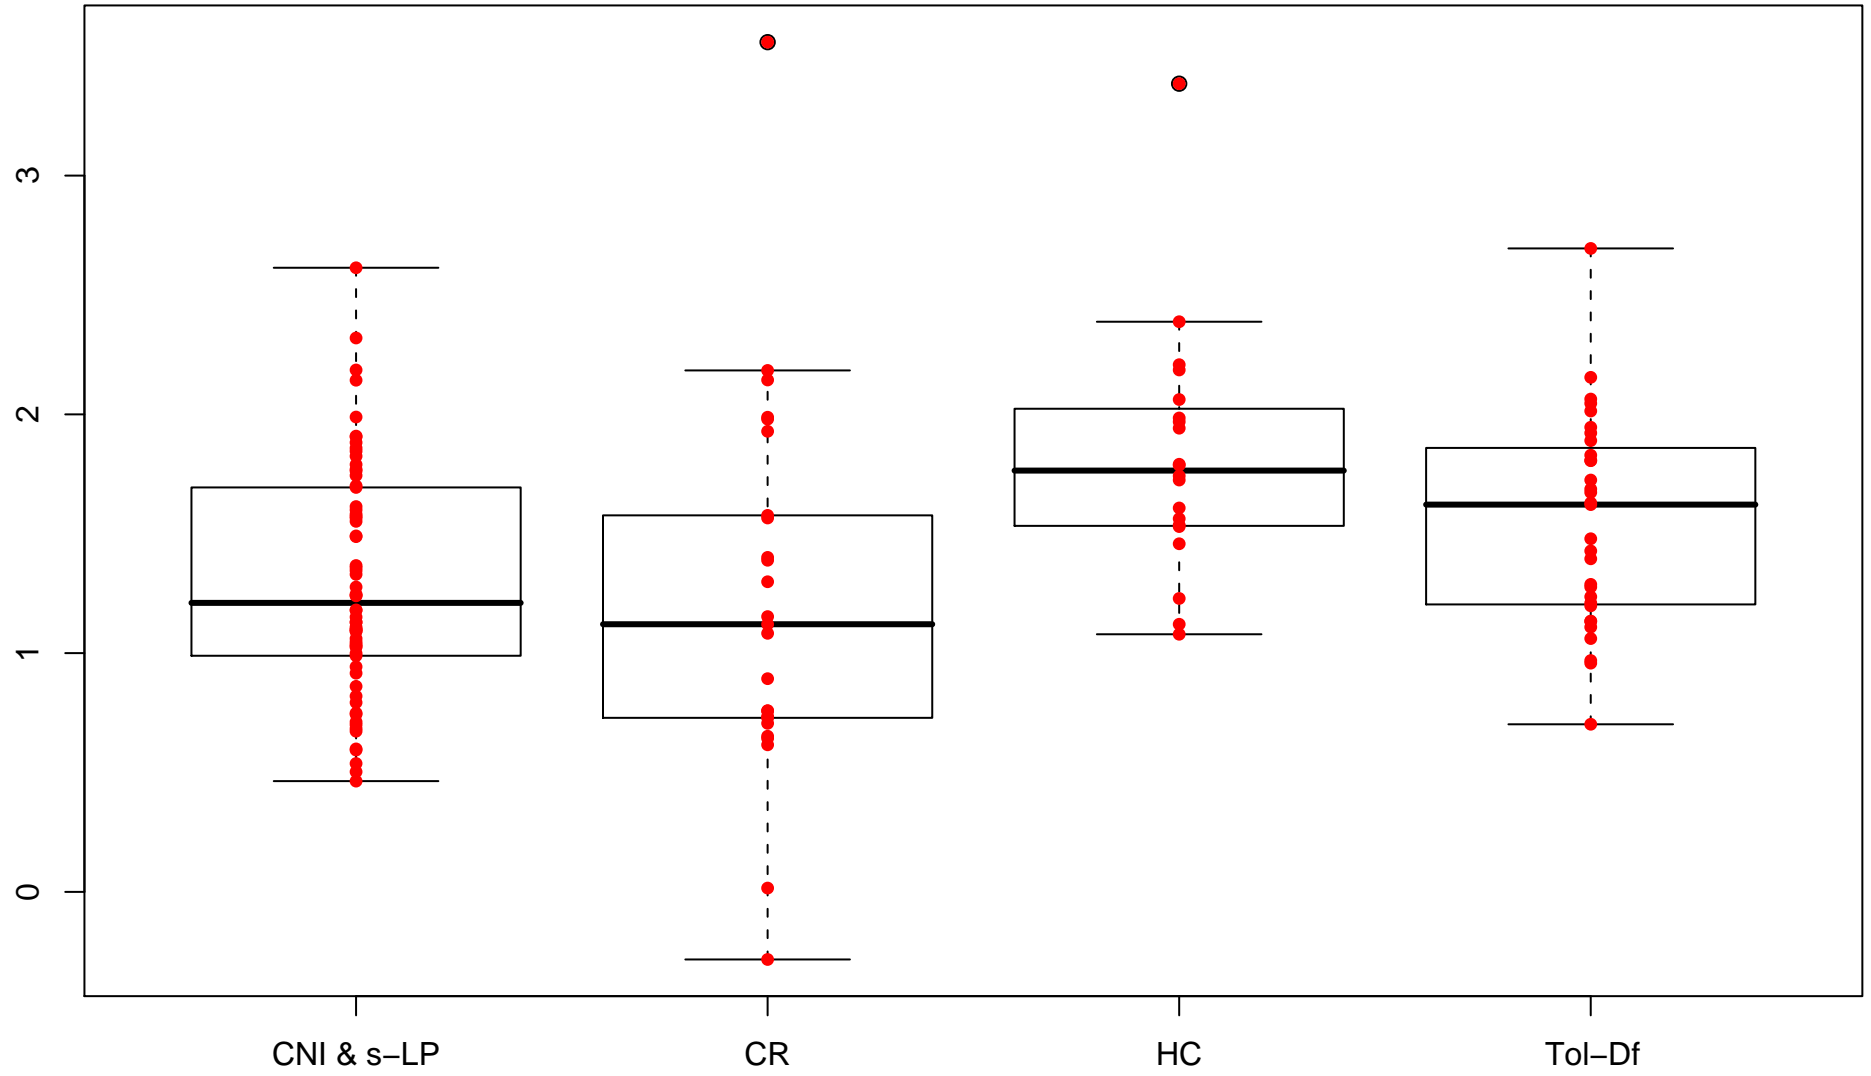

Rank 558 : IFITM2  
0.0003444

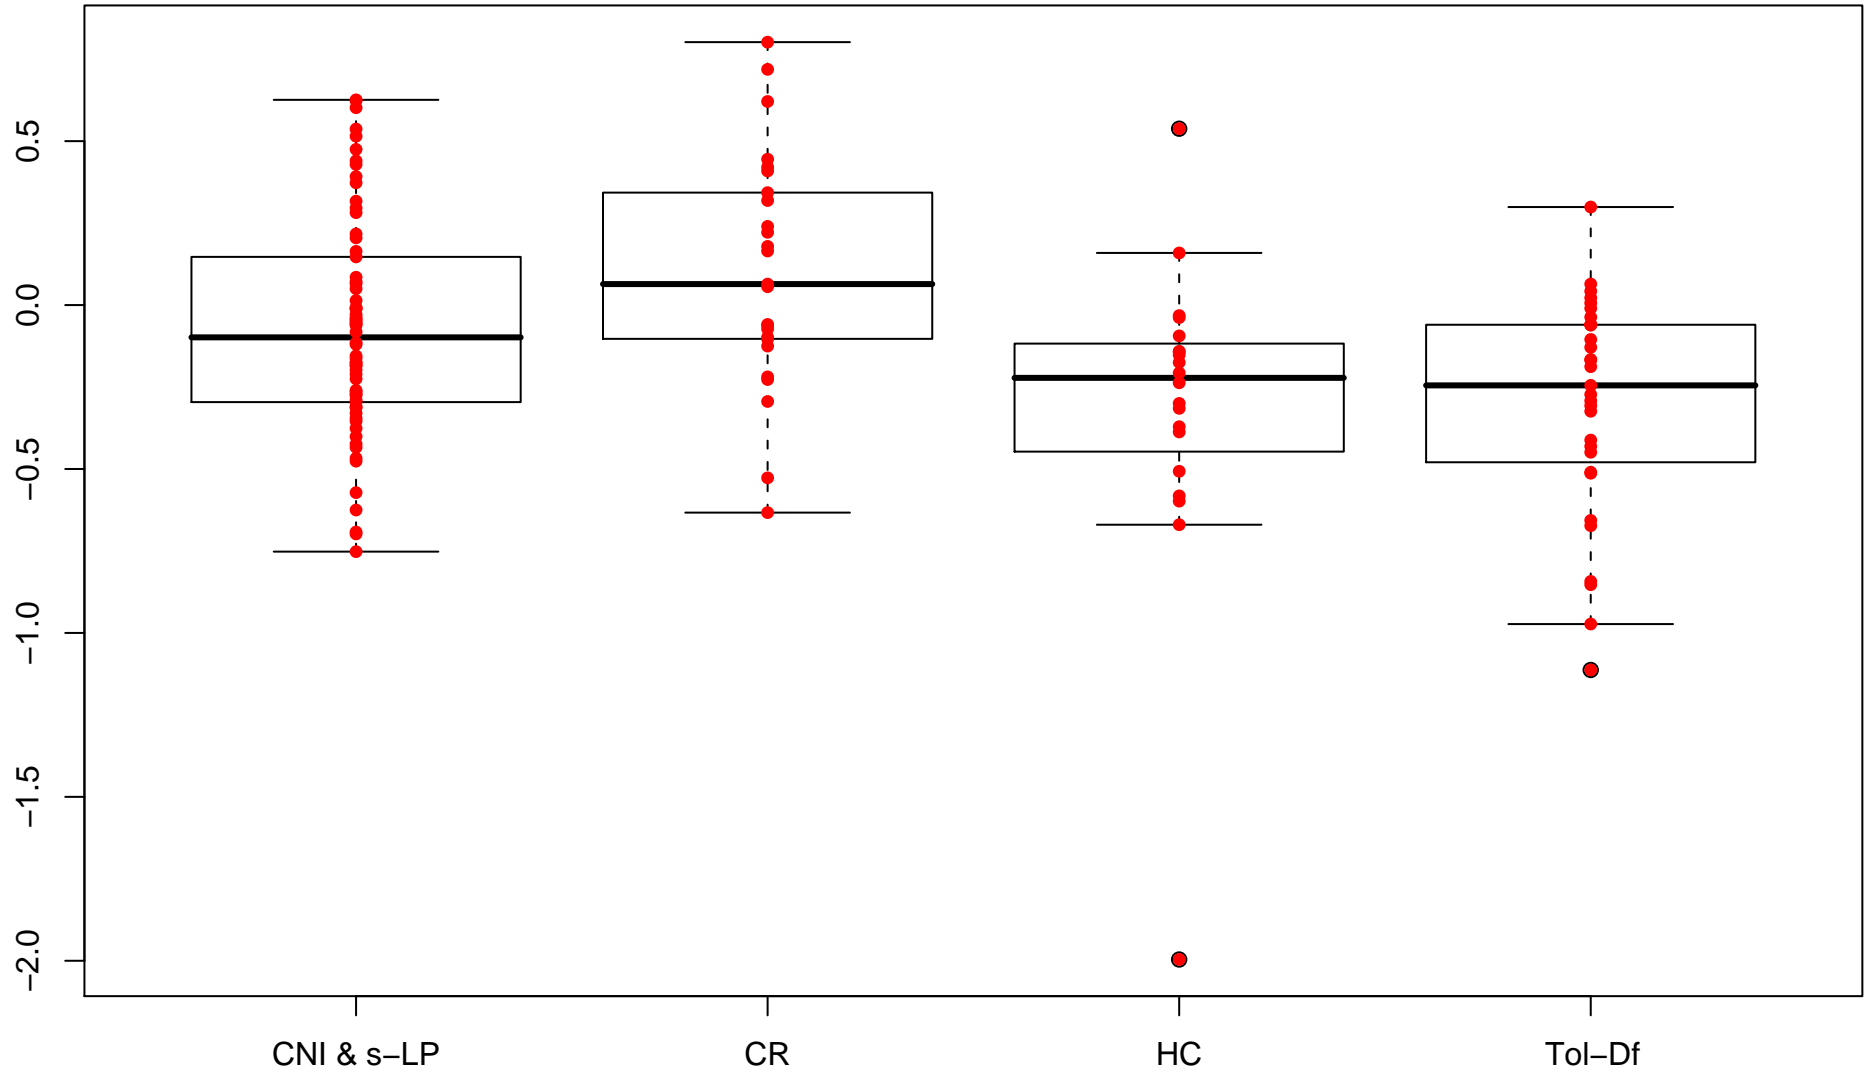

Rank 559 : PSMB4  
0.0003451

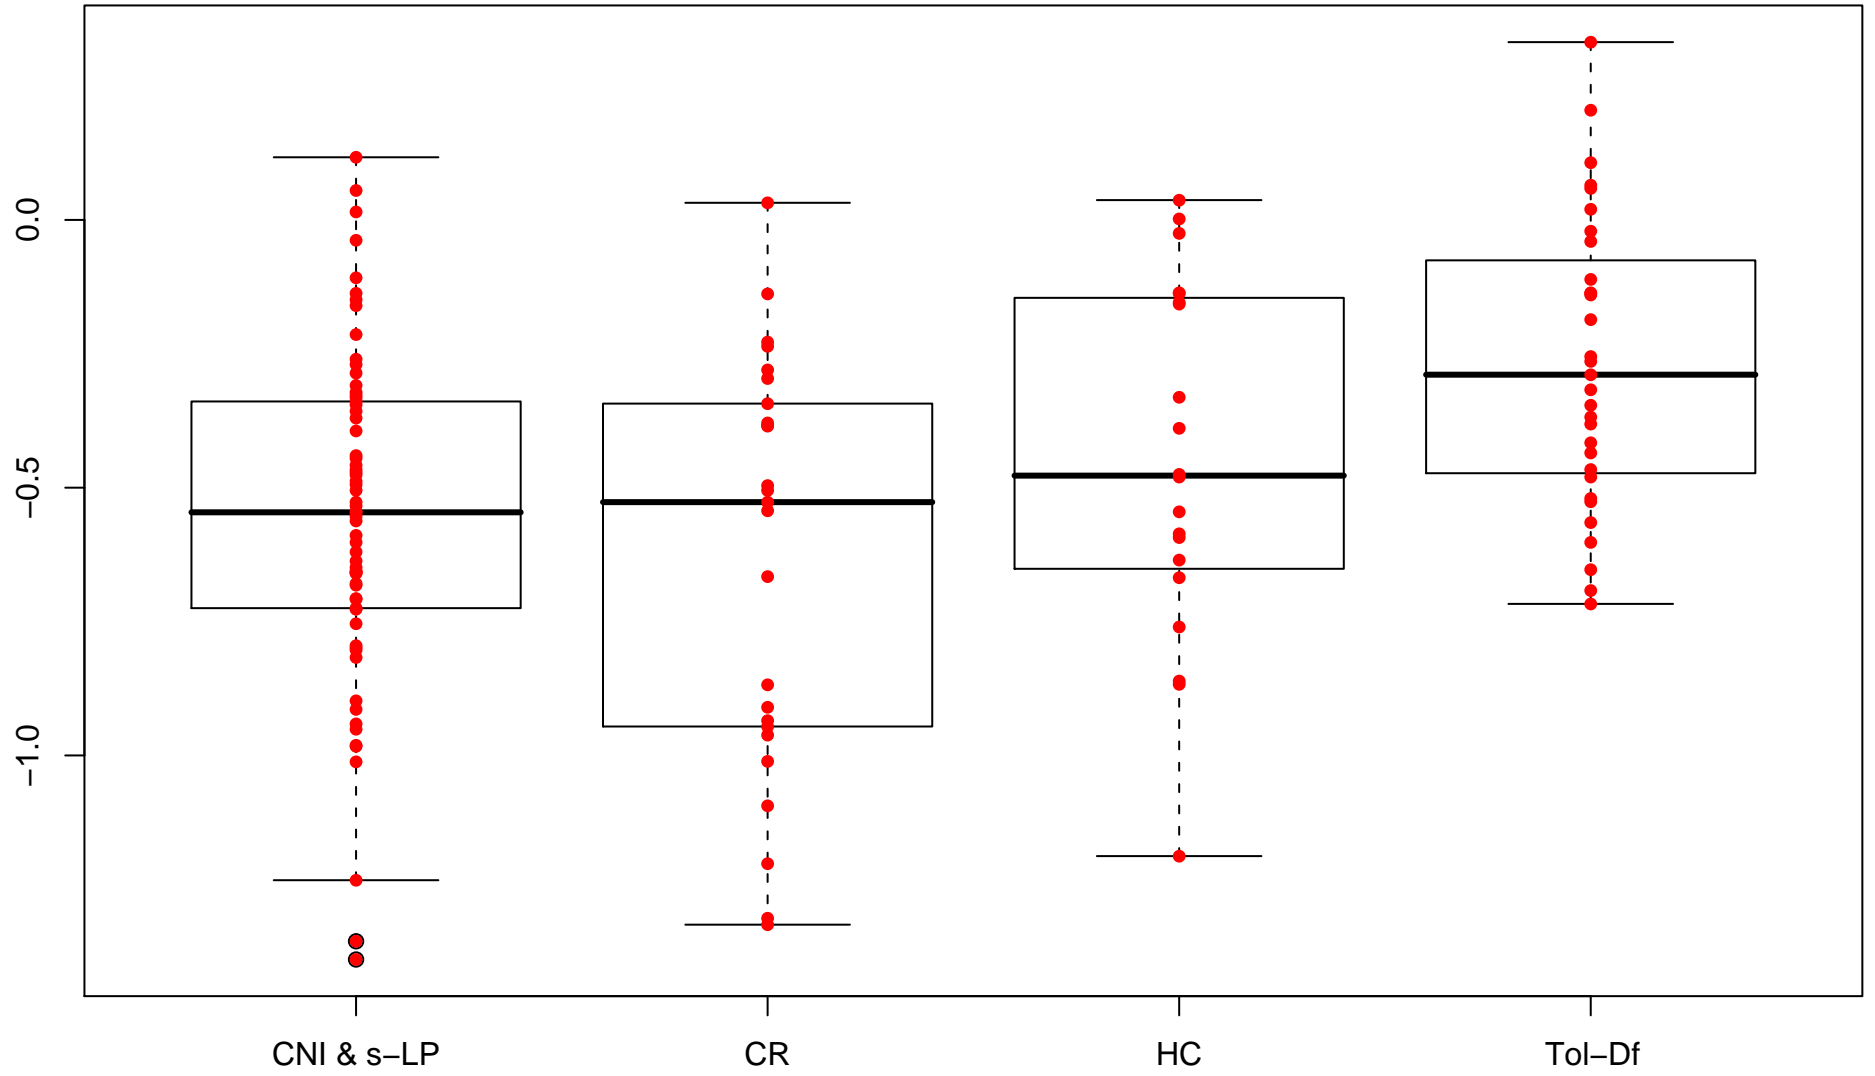



Rank 560 : ITGAE  
0.0003461

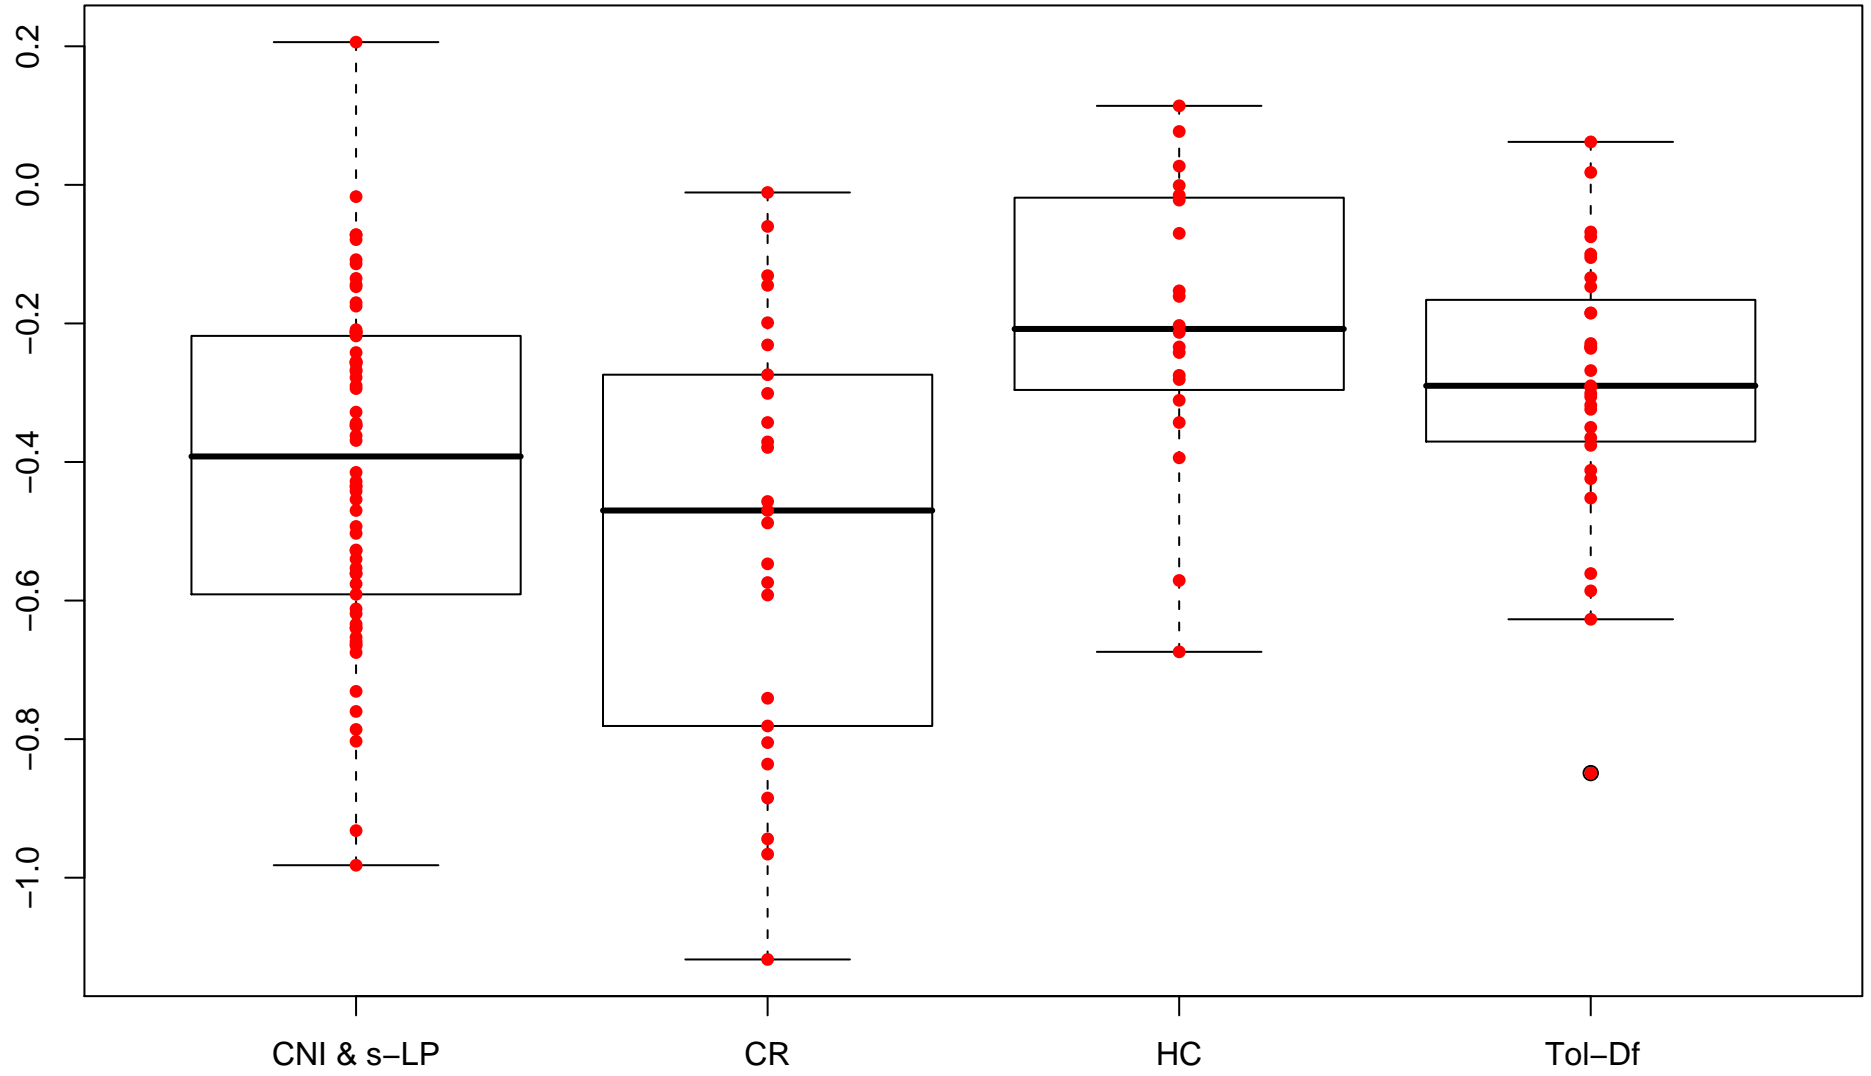

Rank 561 : A\_24\_P942312  
0.0003467

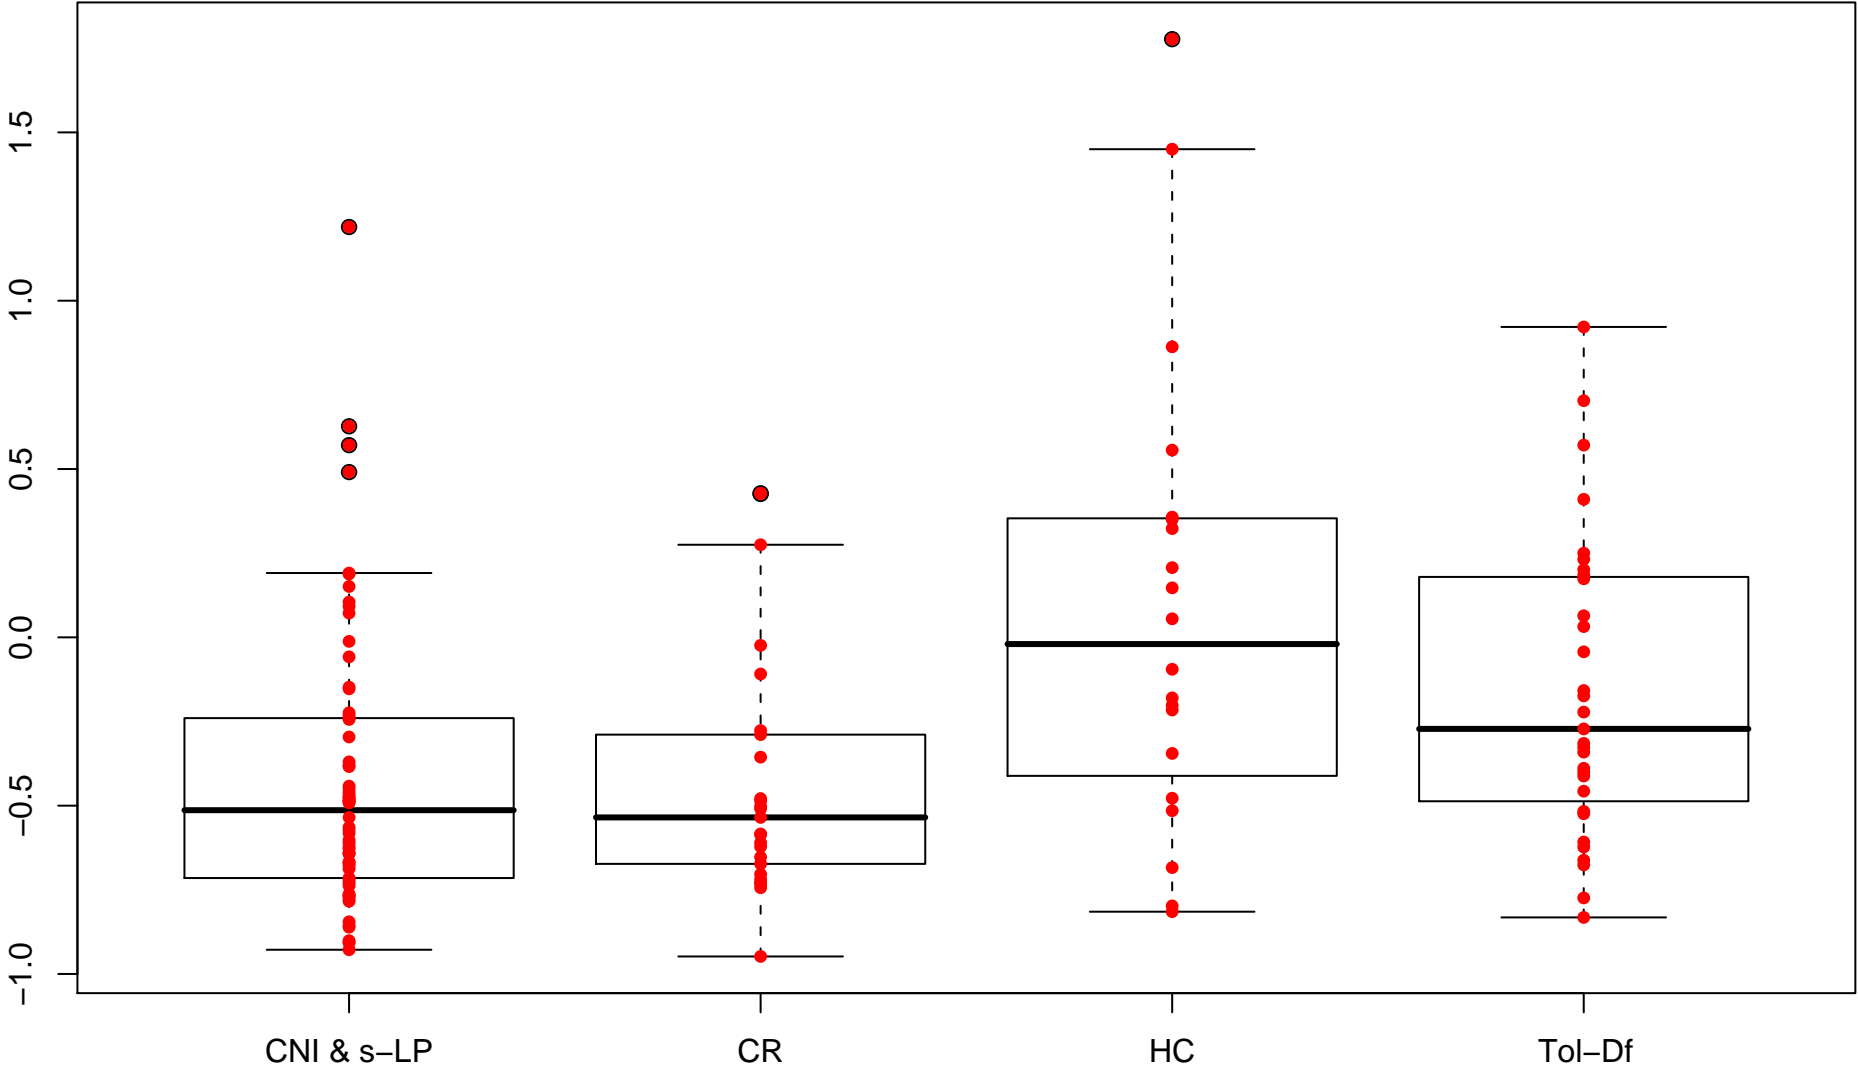

Rank 562 : ARPC4  
0.0003496

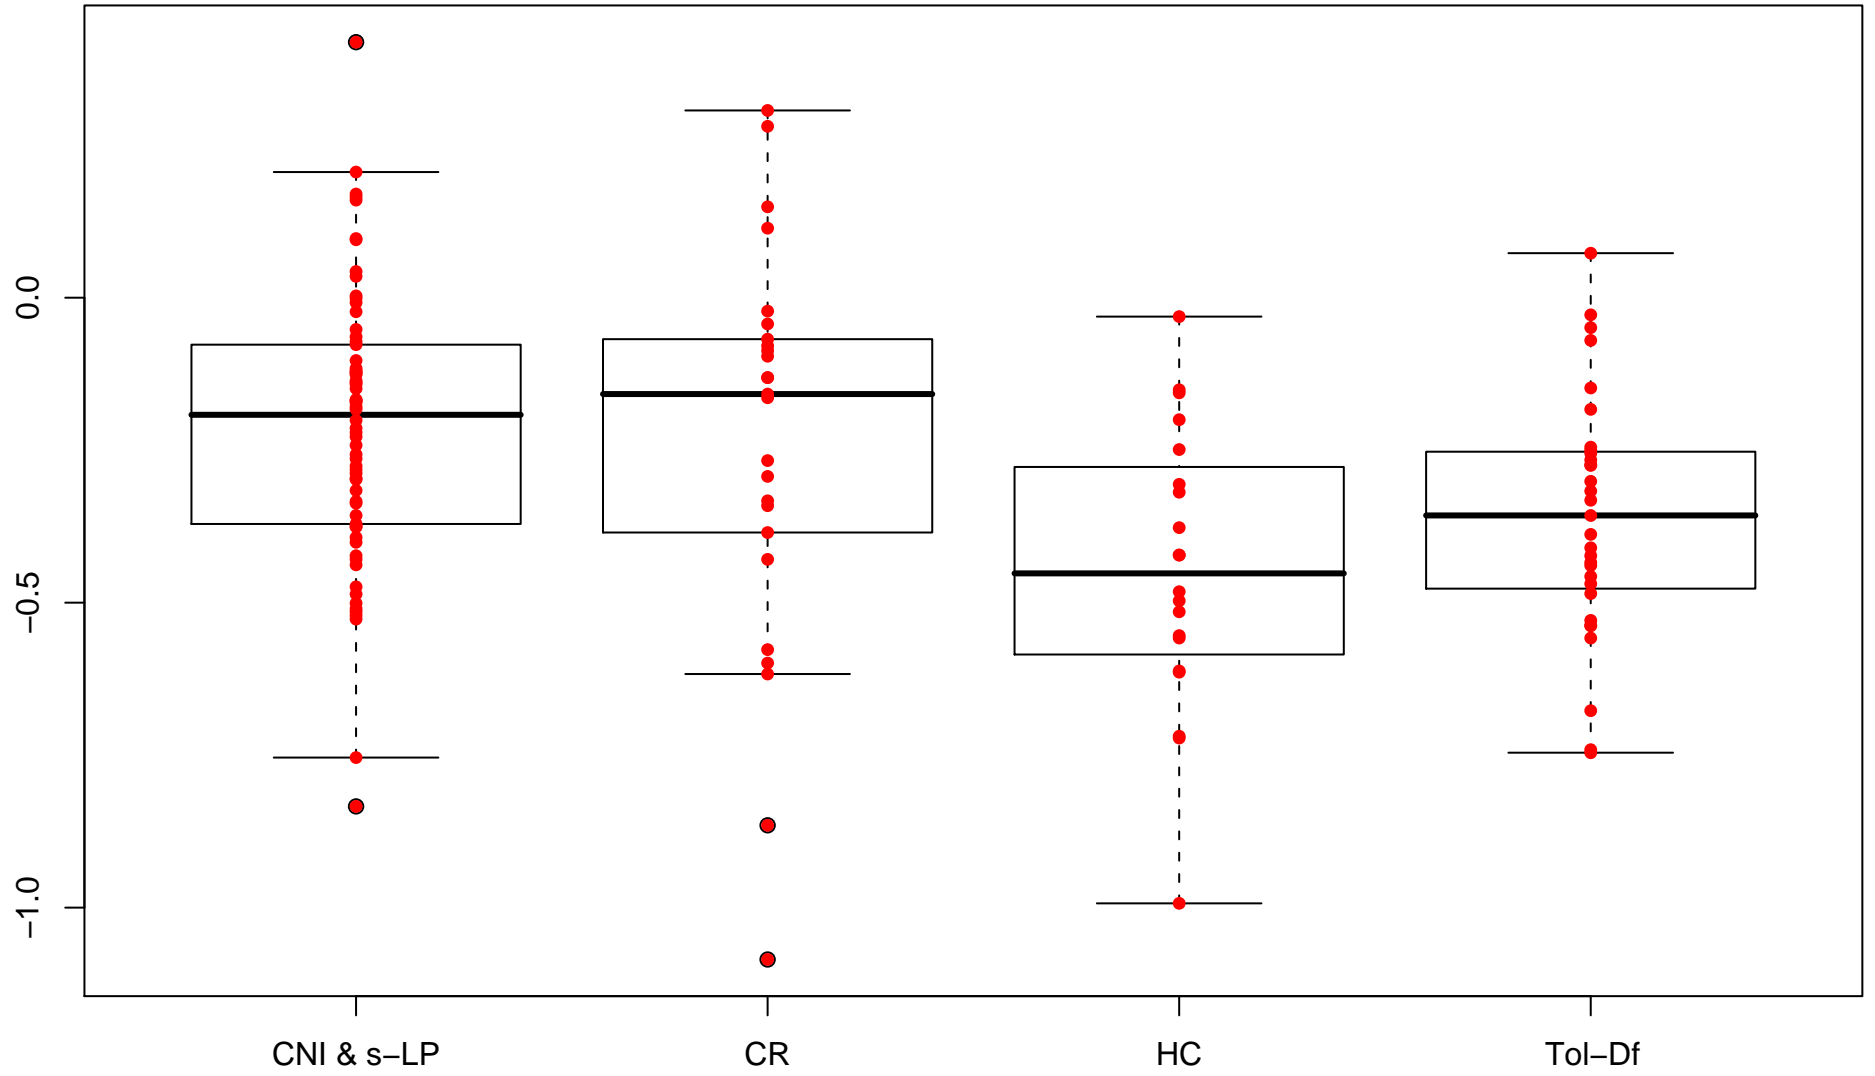

Rank 563 : MAFG;LOC644132  
0.0003509

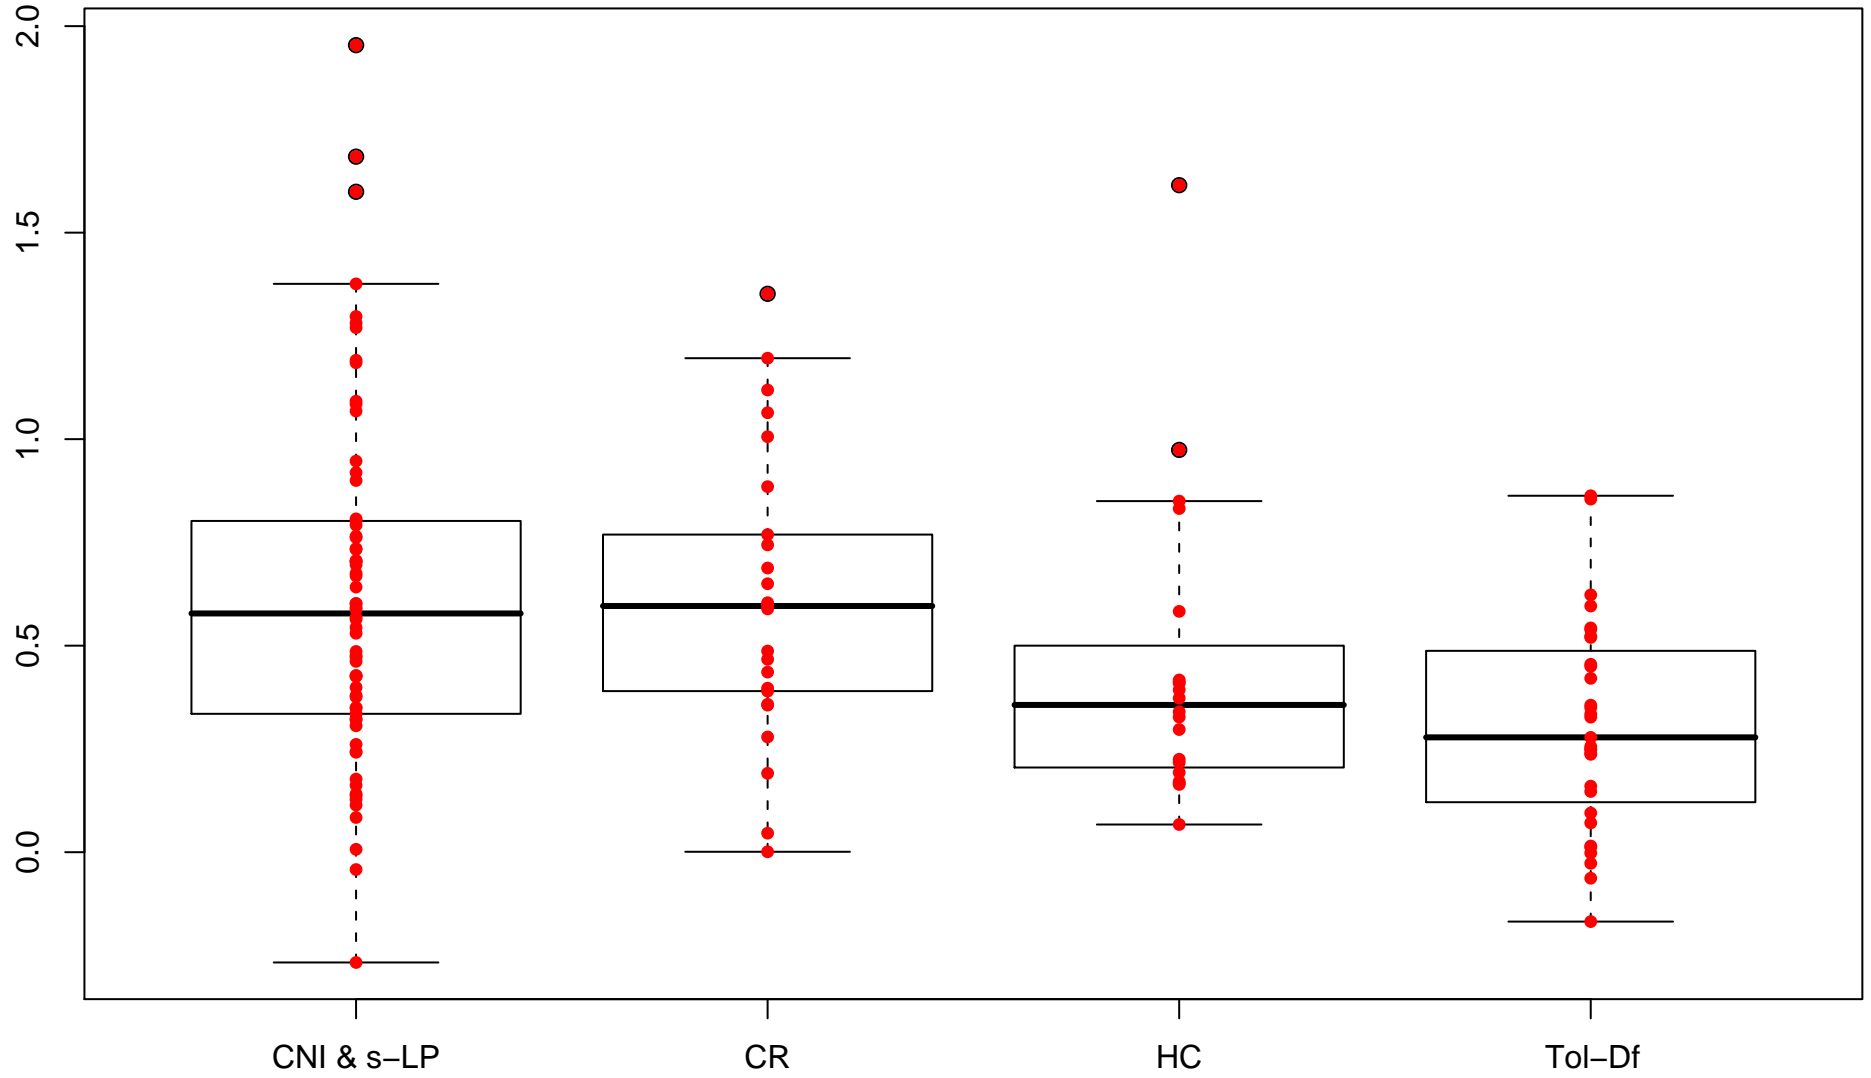

Rank 564 : GABARAPL1  
0.0003526

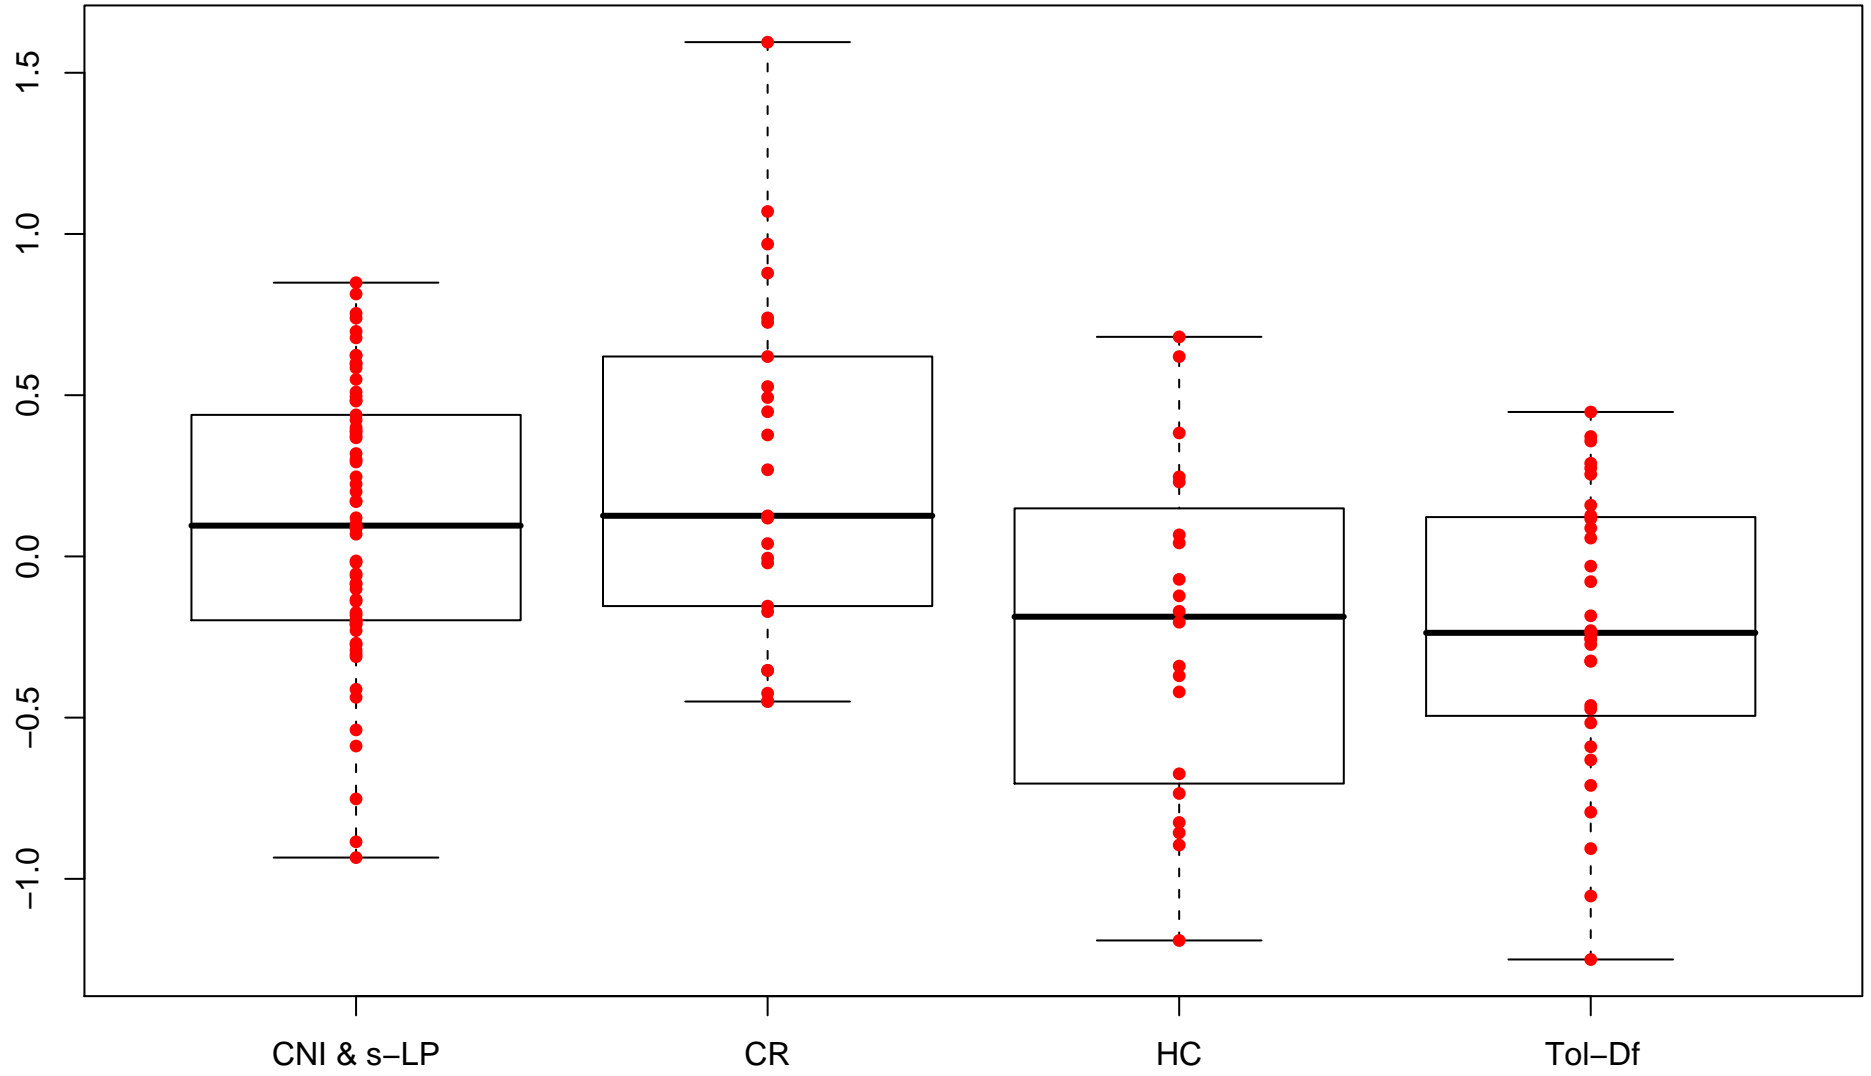

Rank 565 : ELP2  
0.0003567

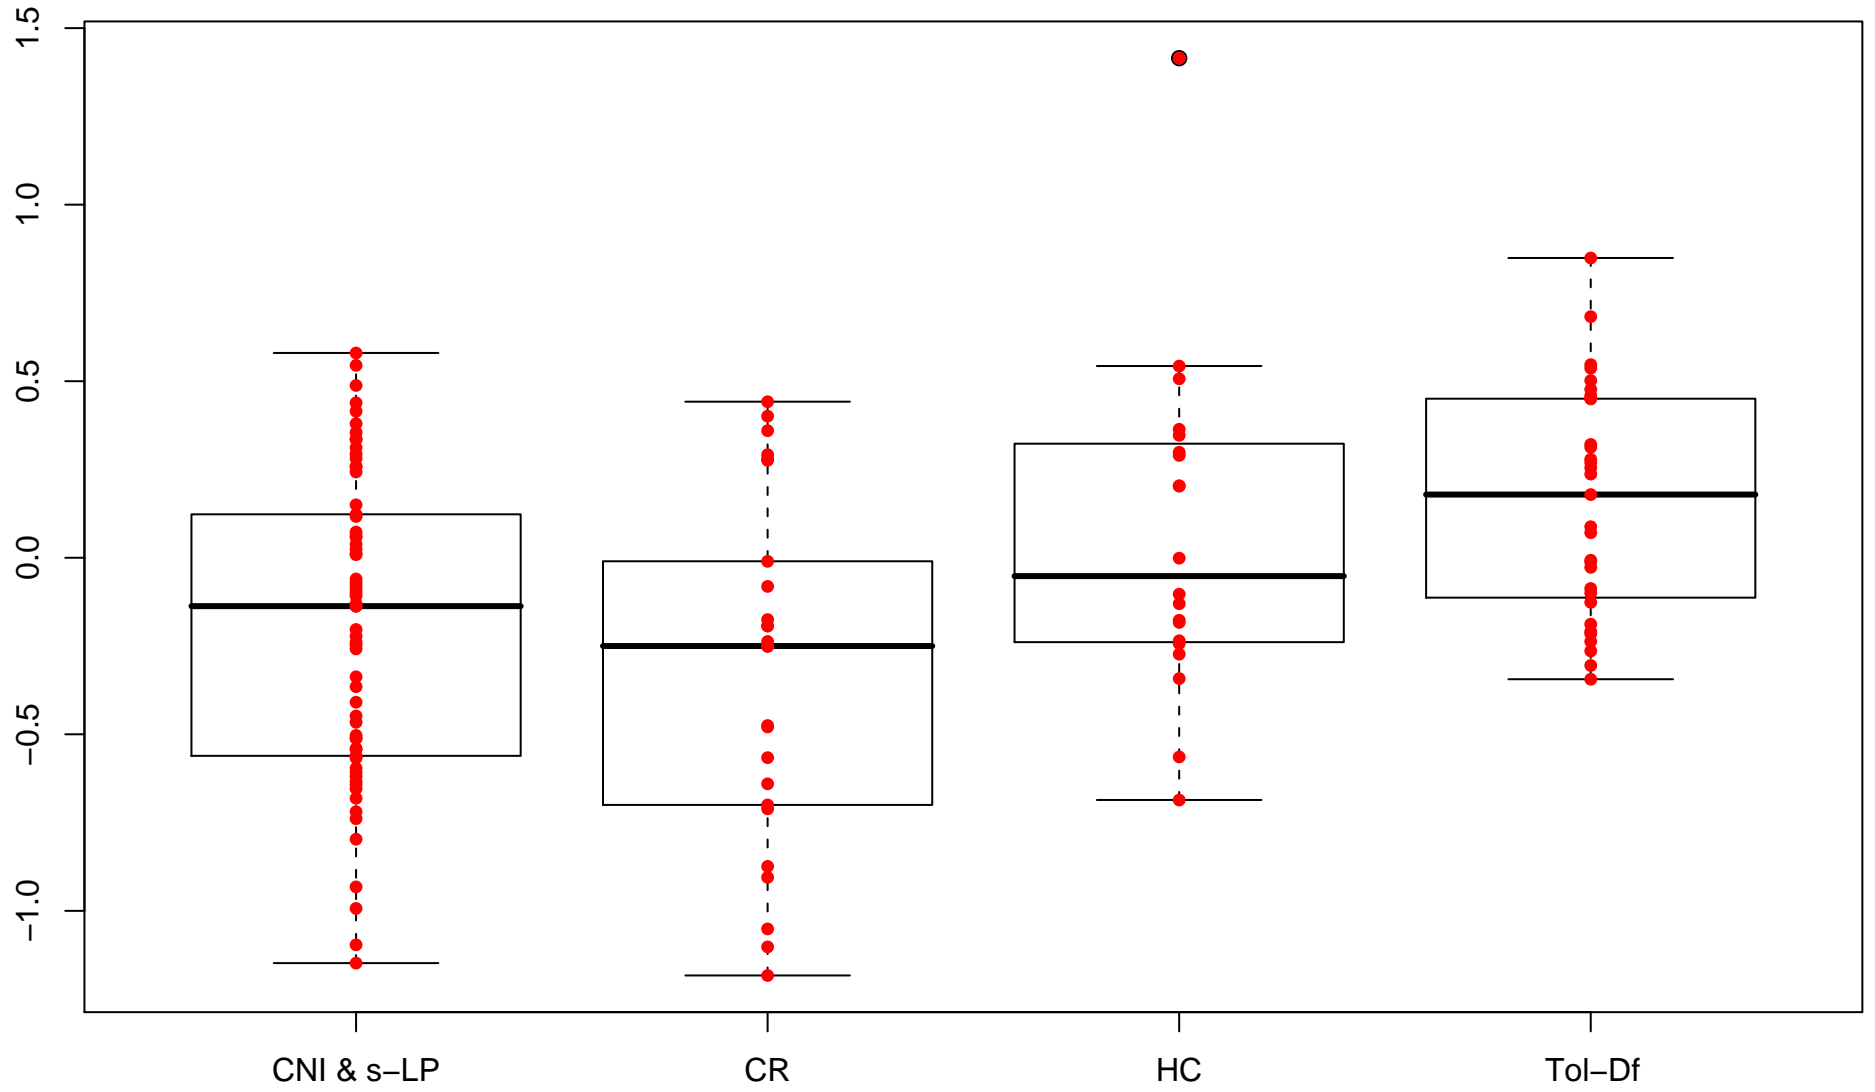

Rank 566 : ACSL1  
0.0003615

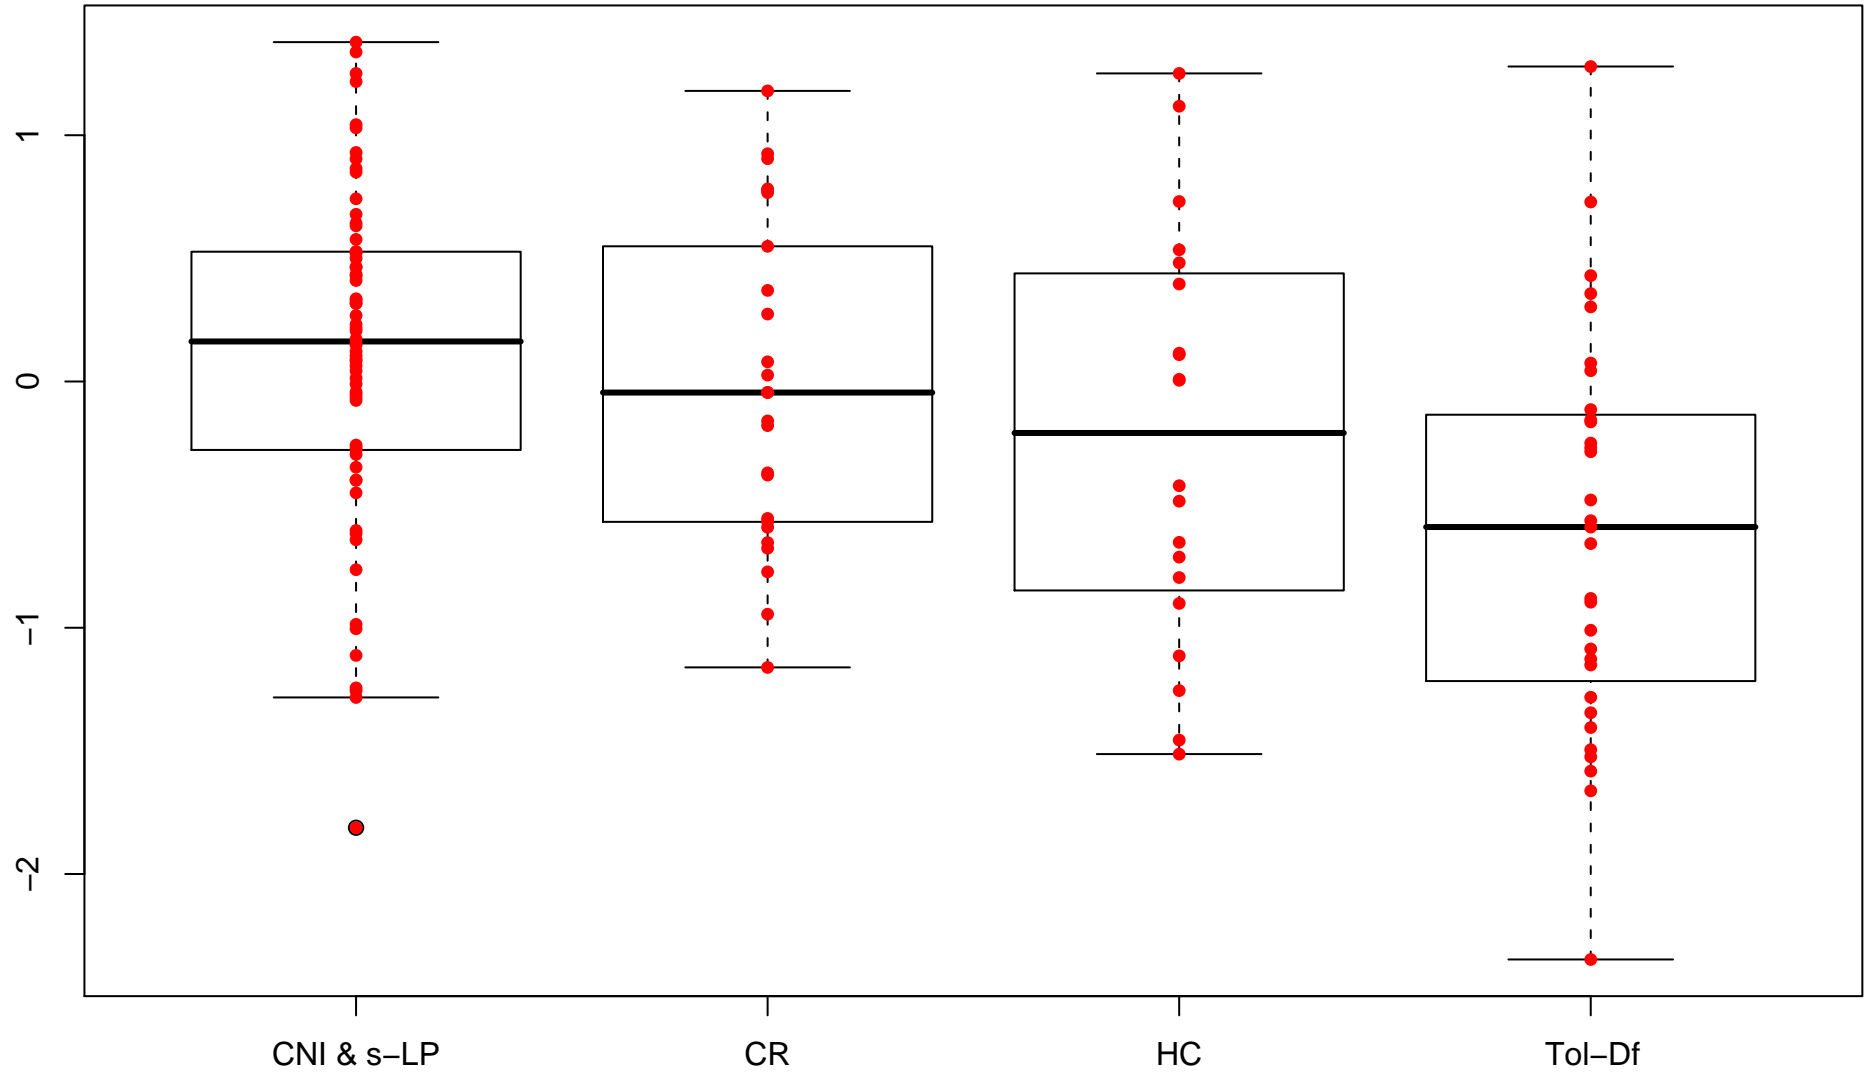

Rank 567 : LOC441641  
0.0003695

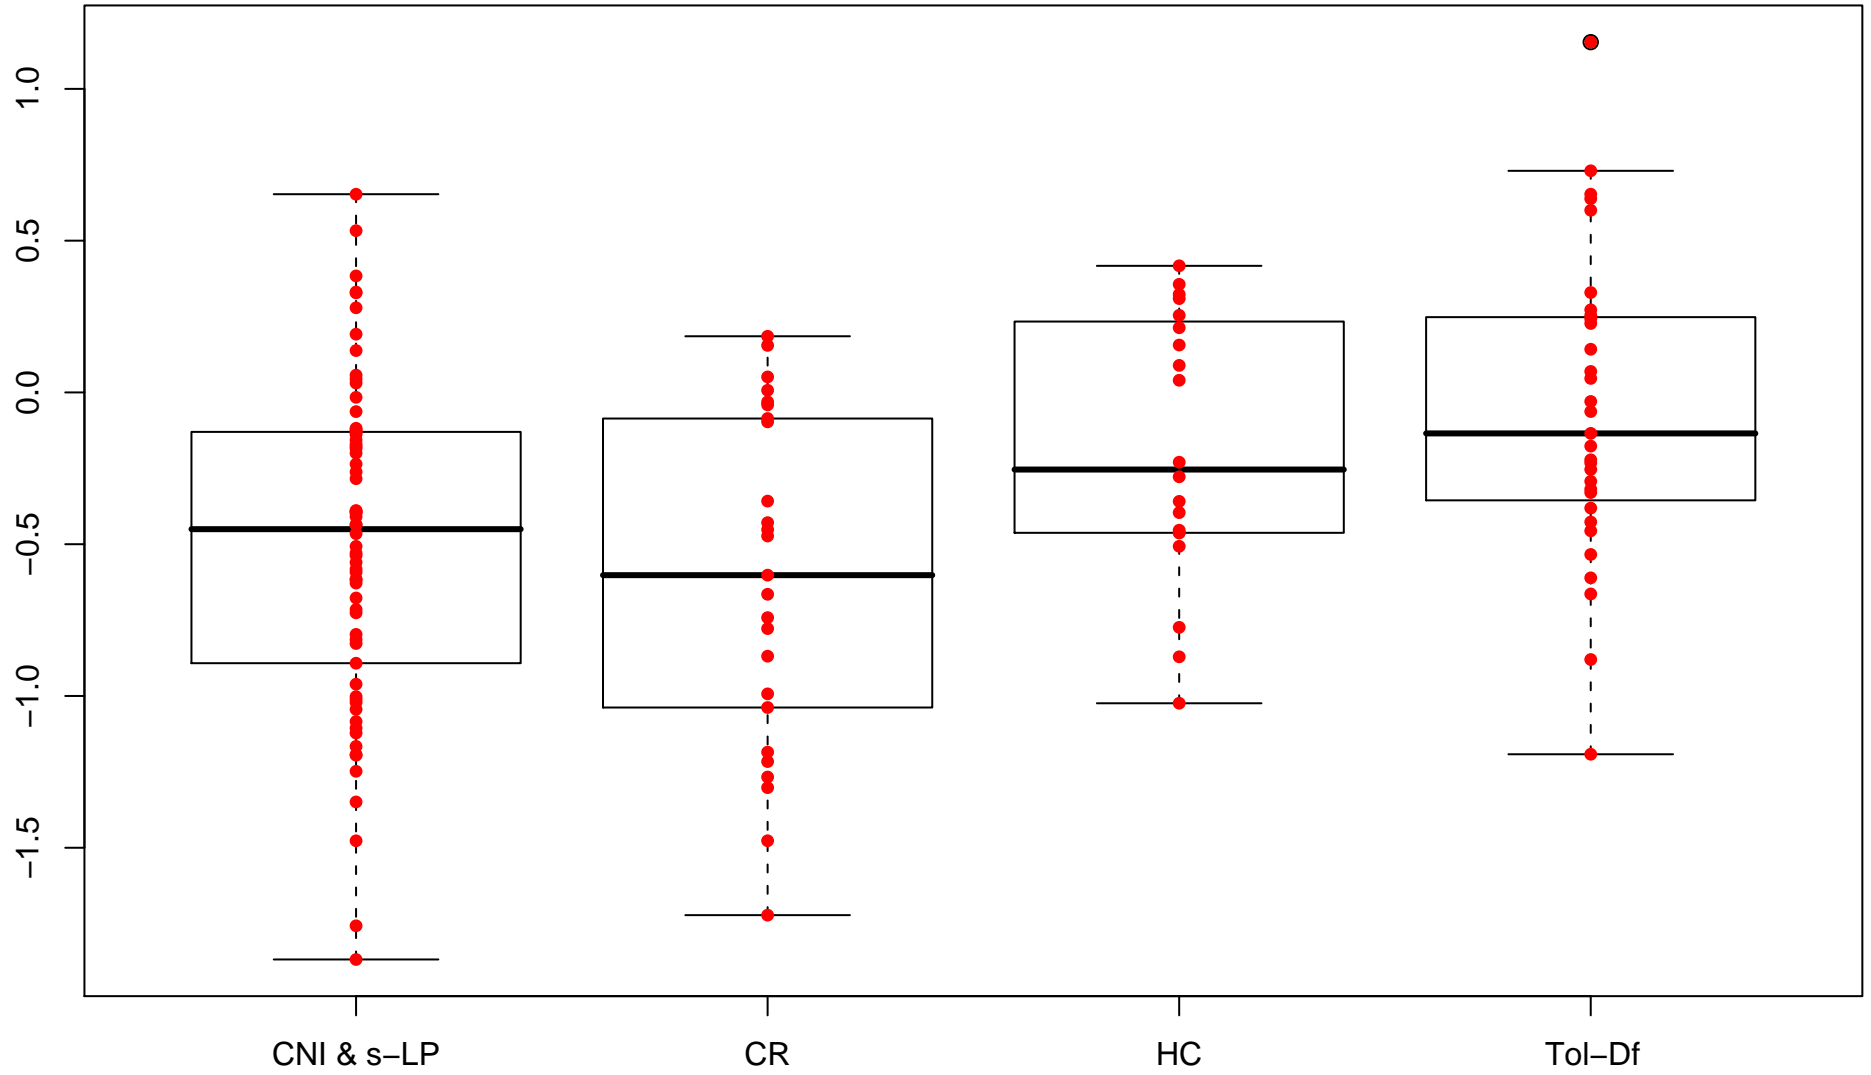



Rank 568 : C19ORF43  
0.0003698

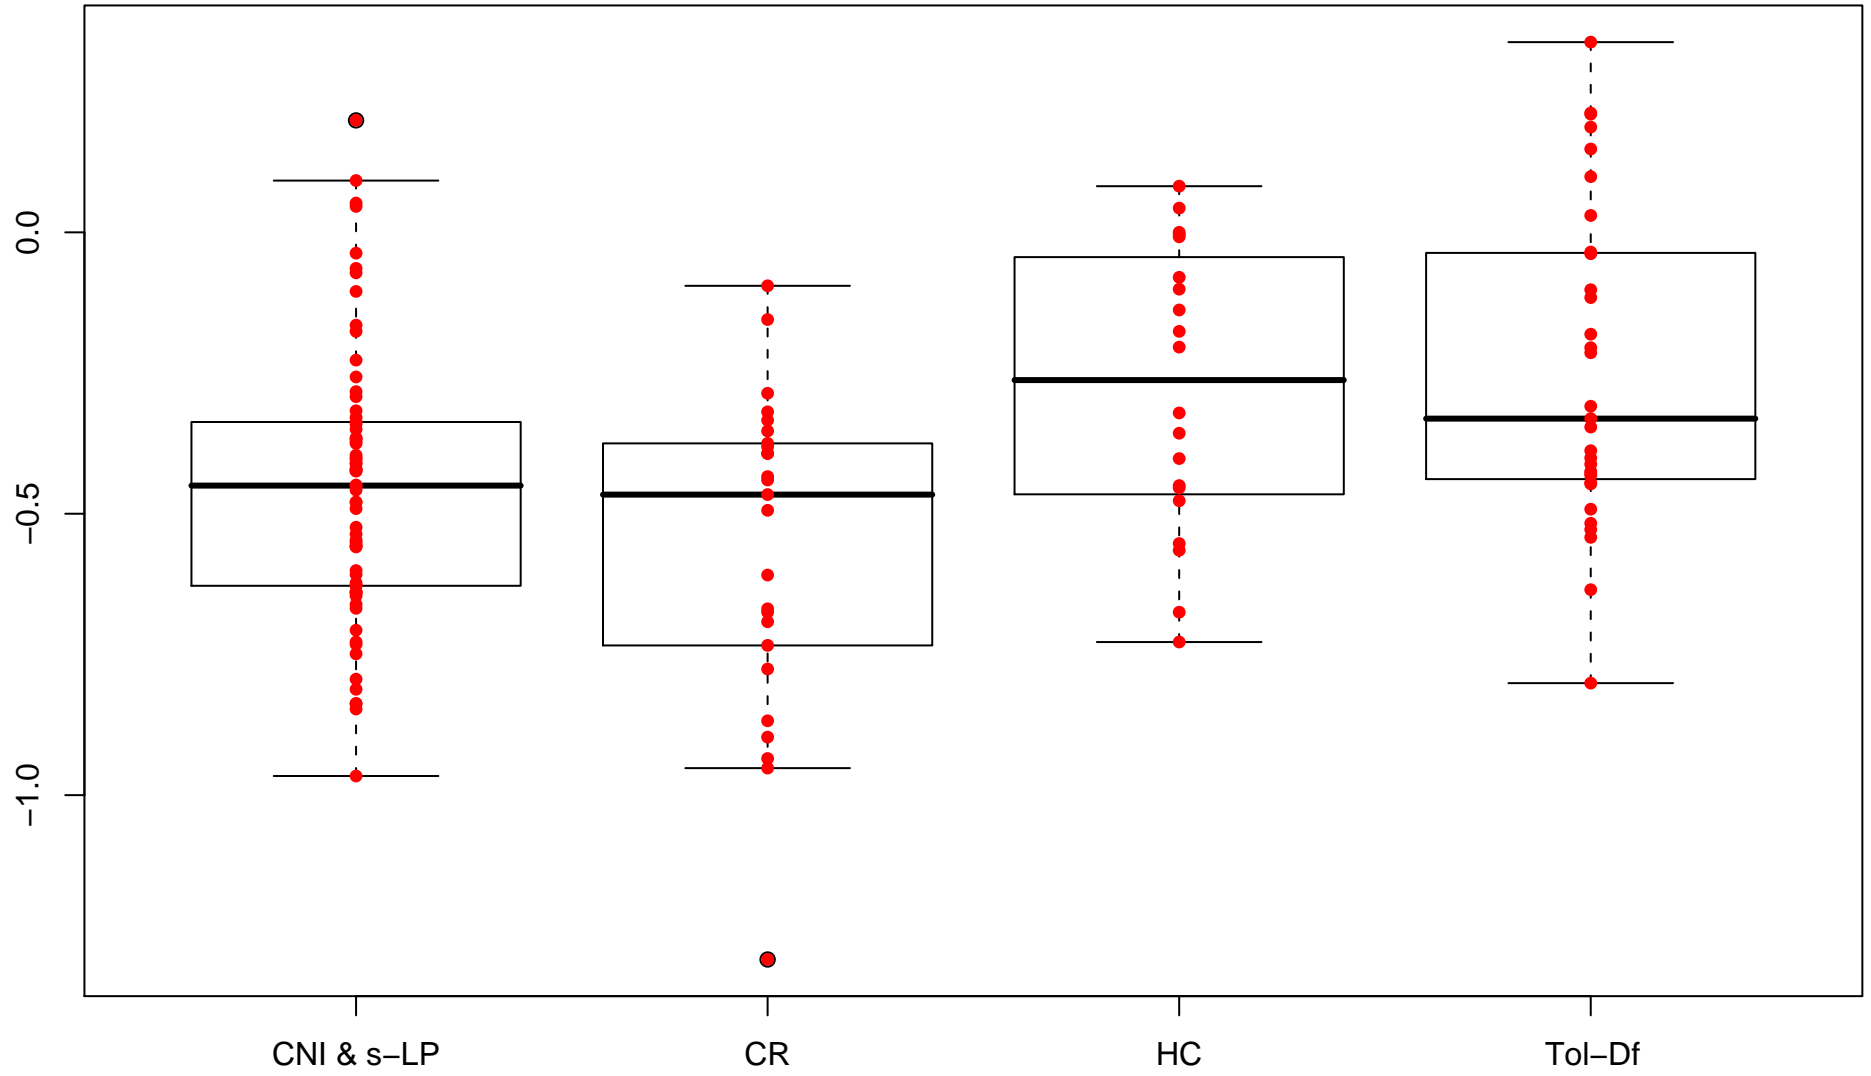

Rank 569 : TSPAN5  
0.00037

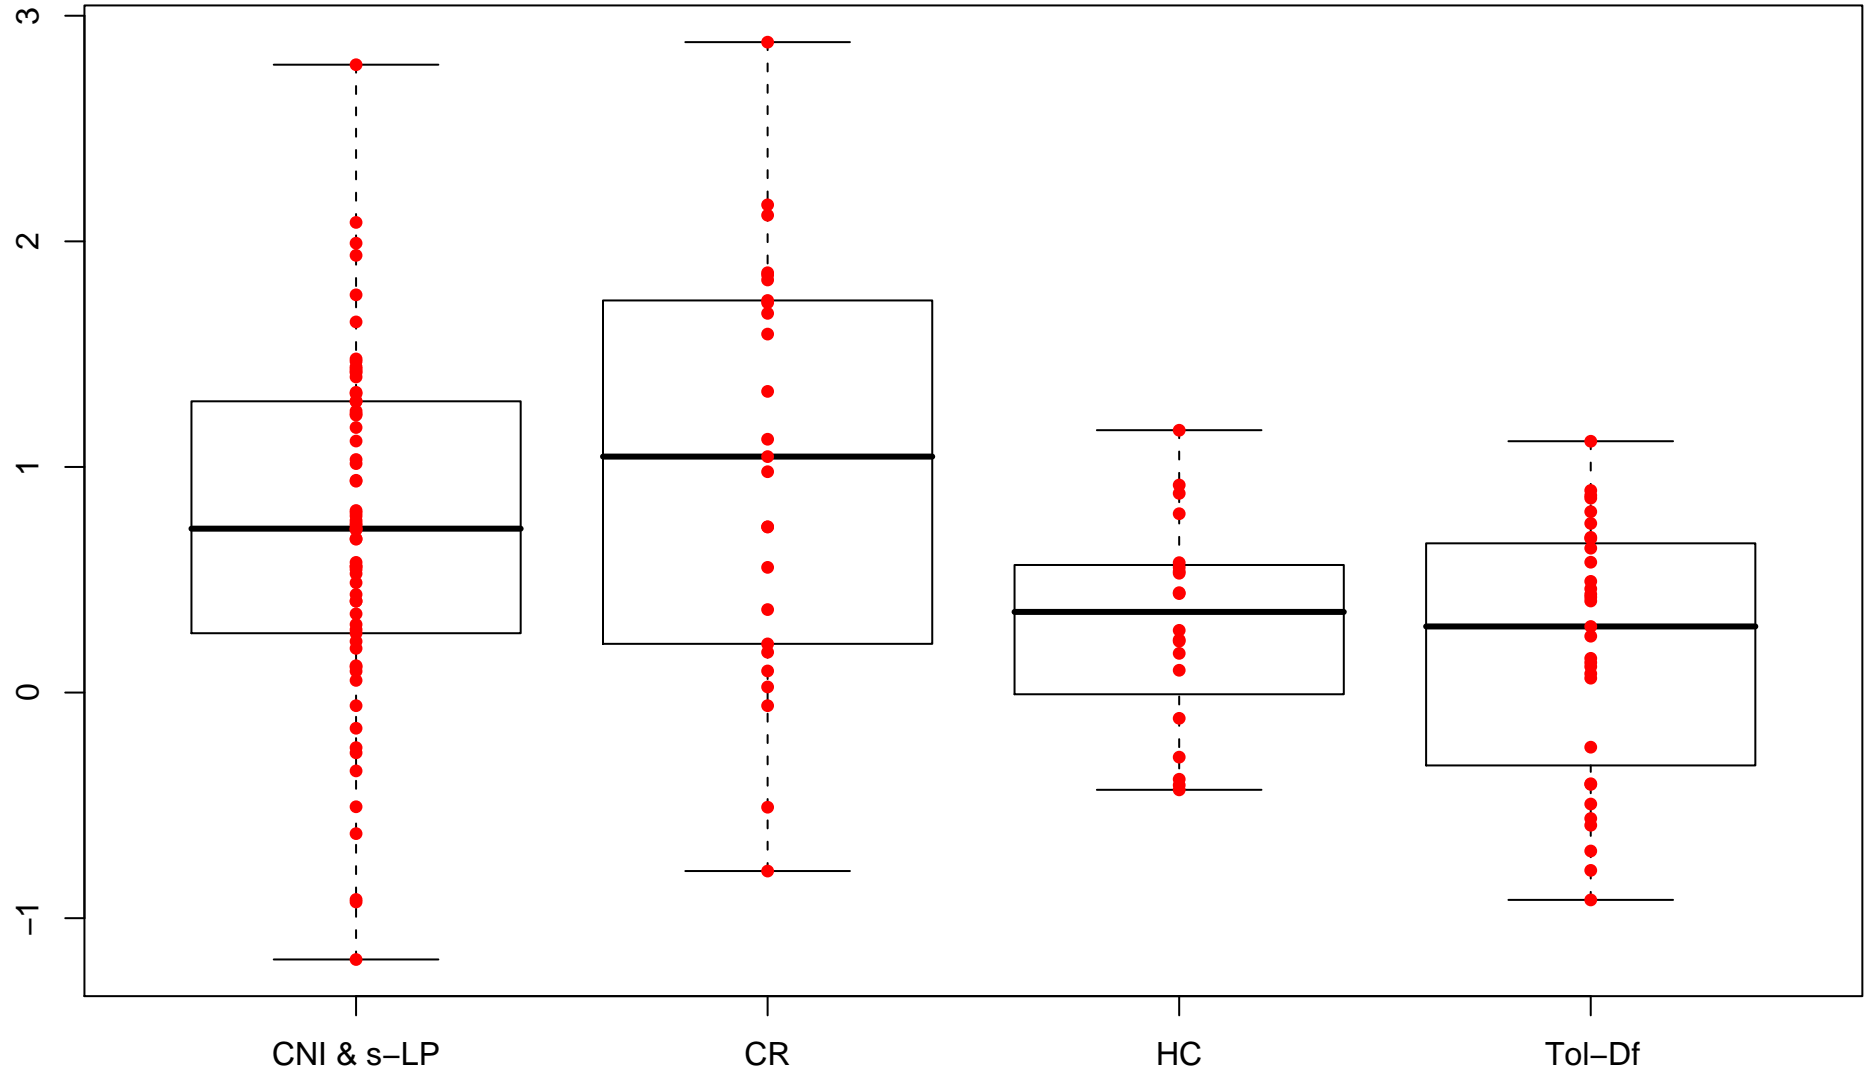

Rank 570 : RORA  
0.0003706

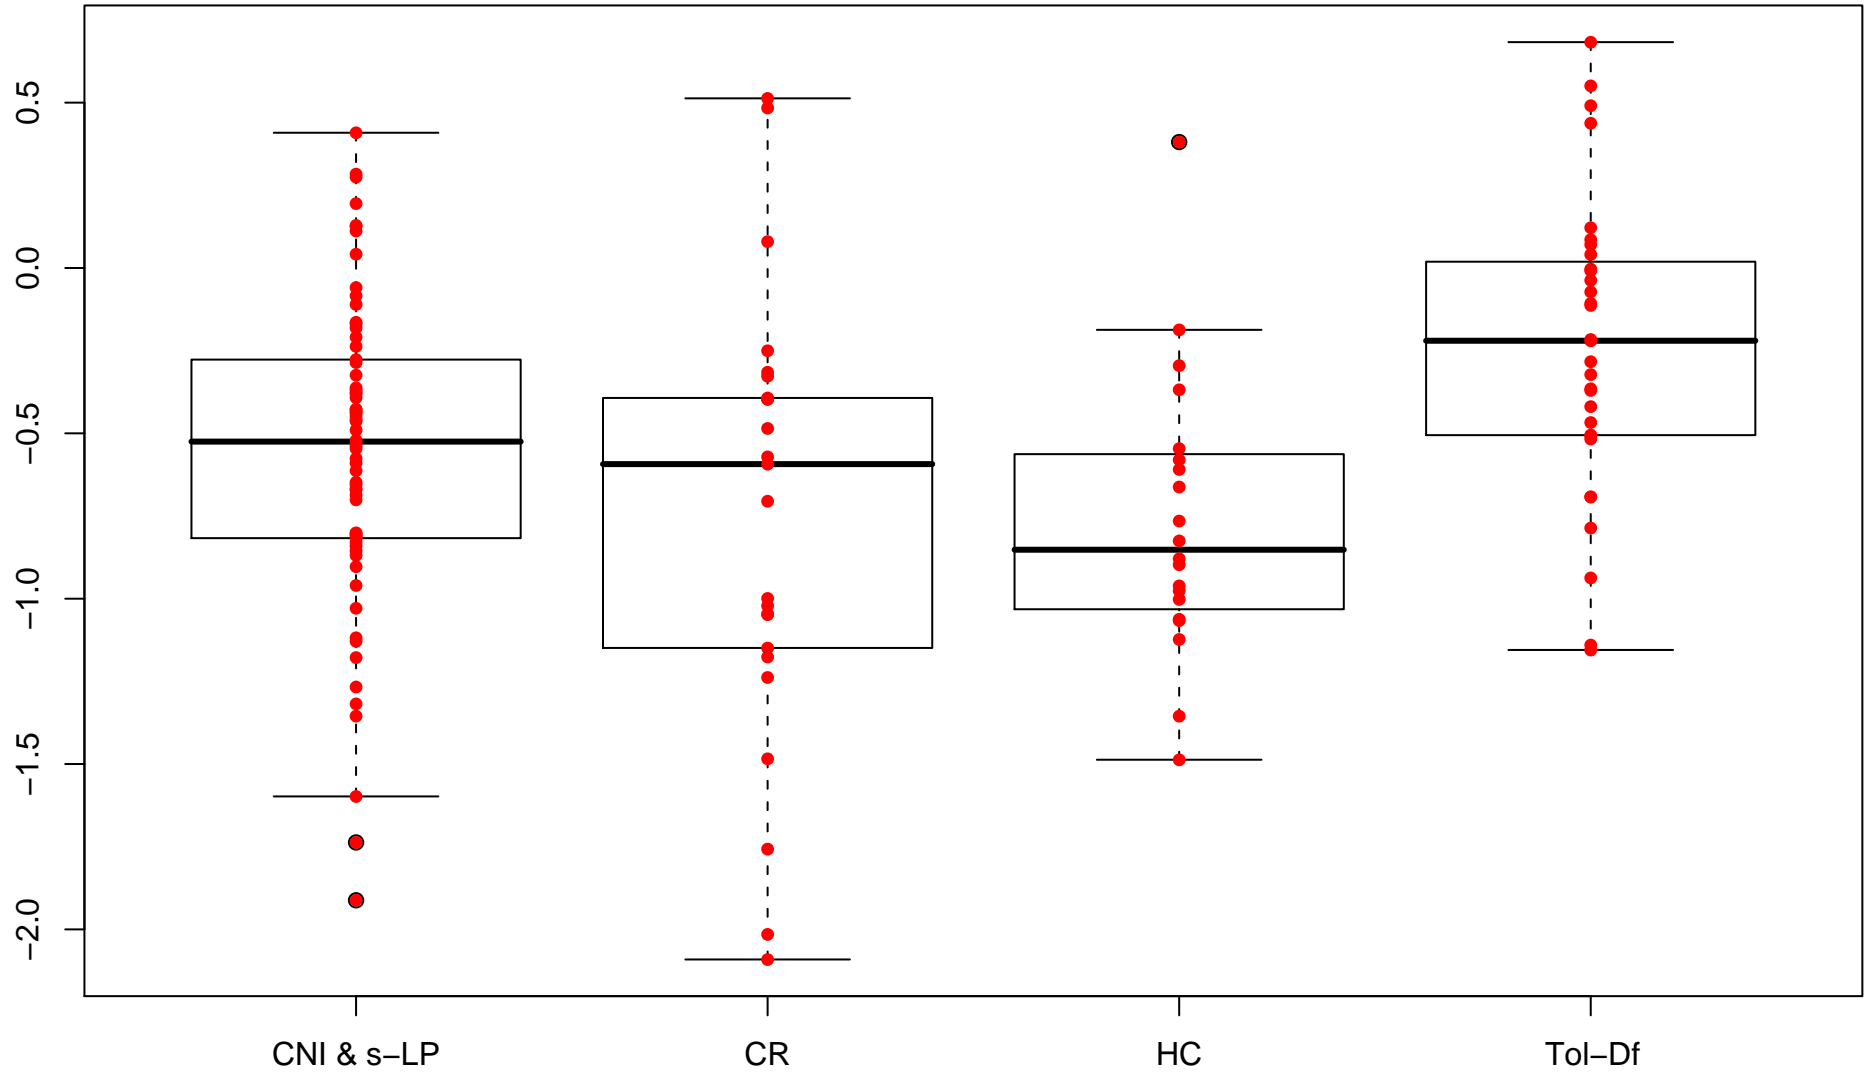

Rank 571 : TRAF7  
0.0003736

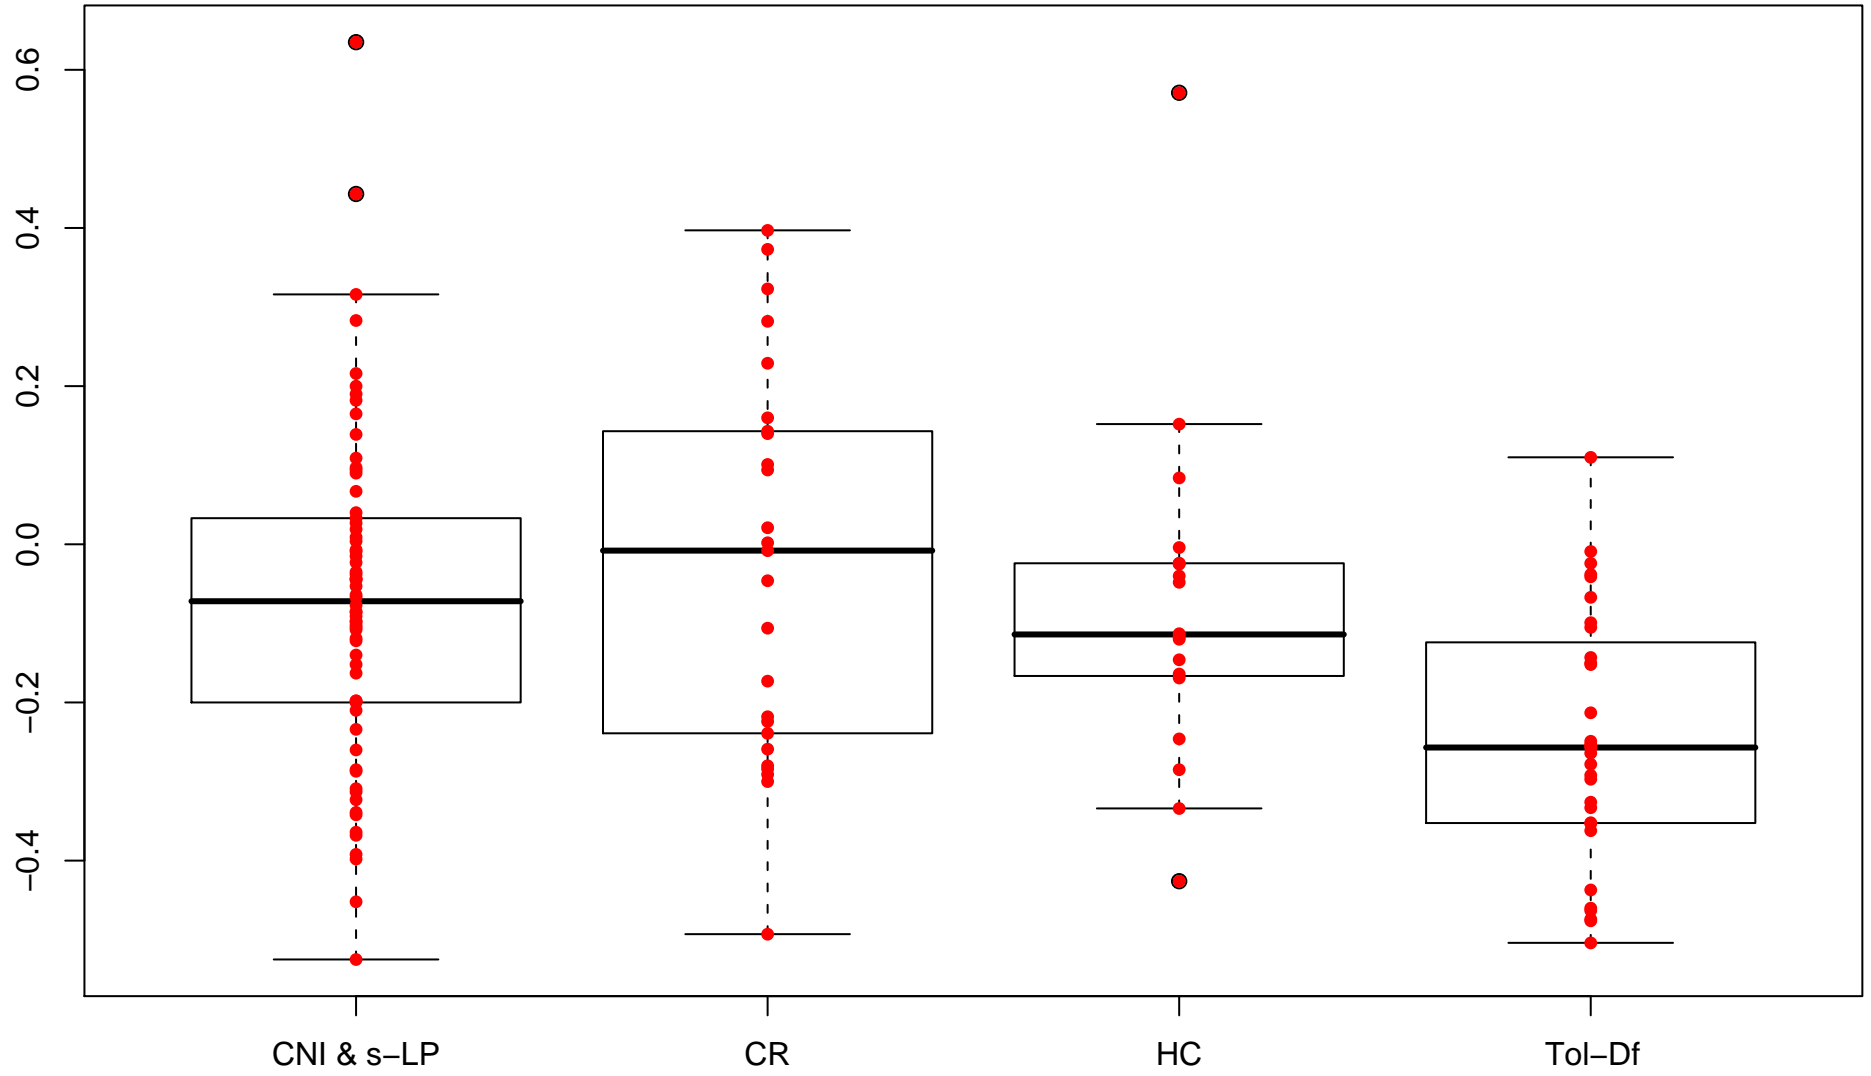

Rank 572 : TLR1  
0.0003771

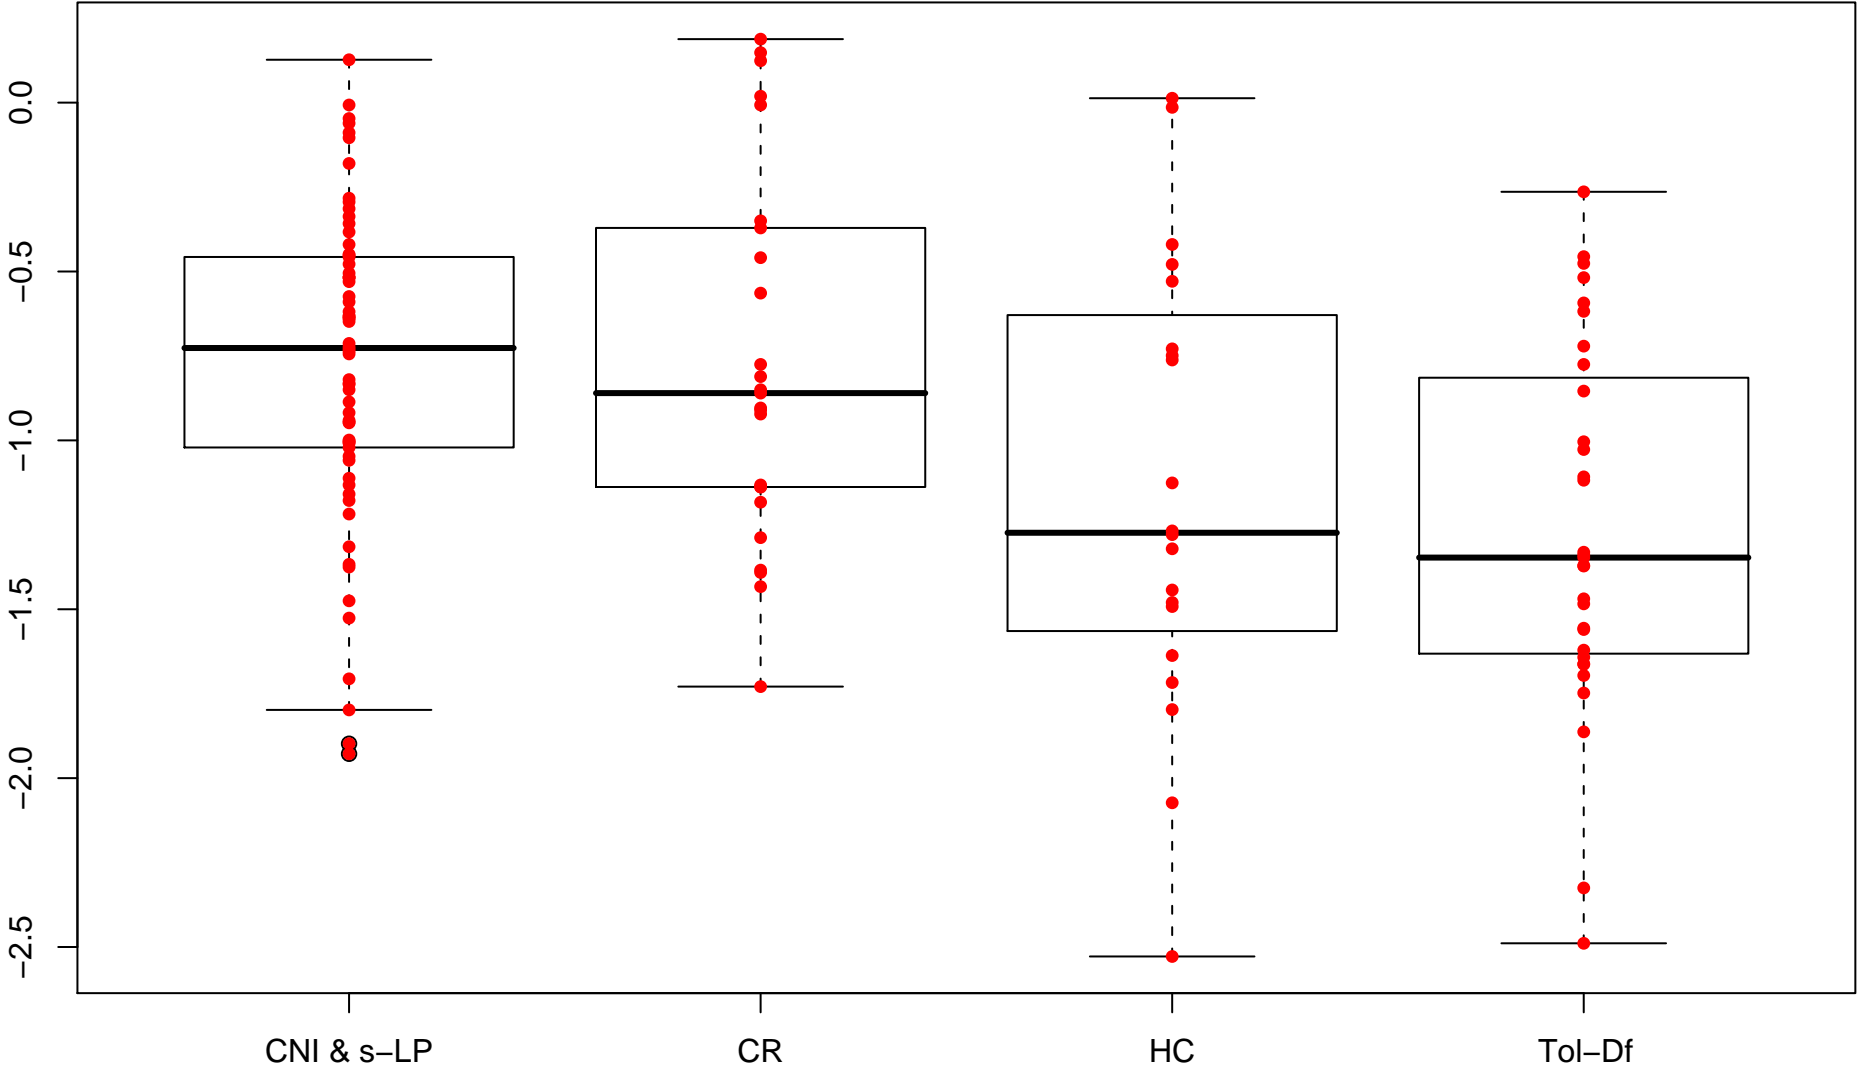

Rank 573 : CD5  
0.0003781

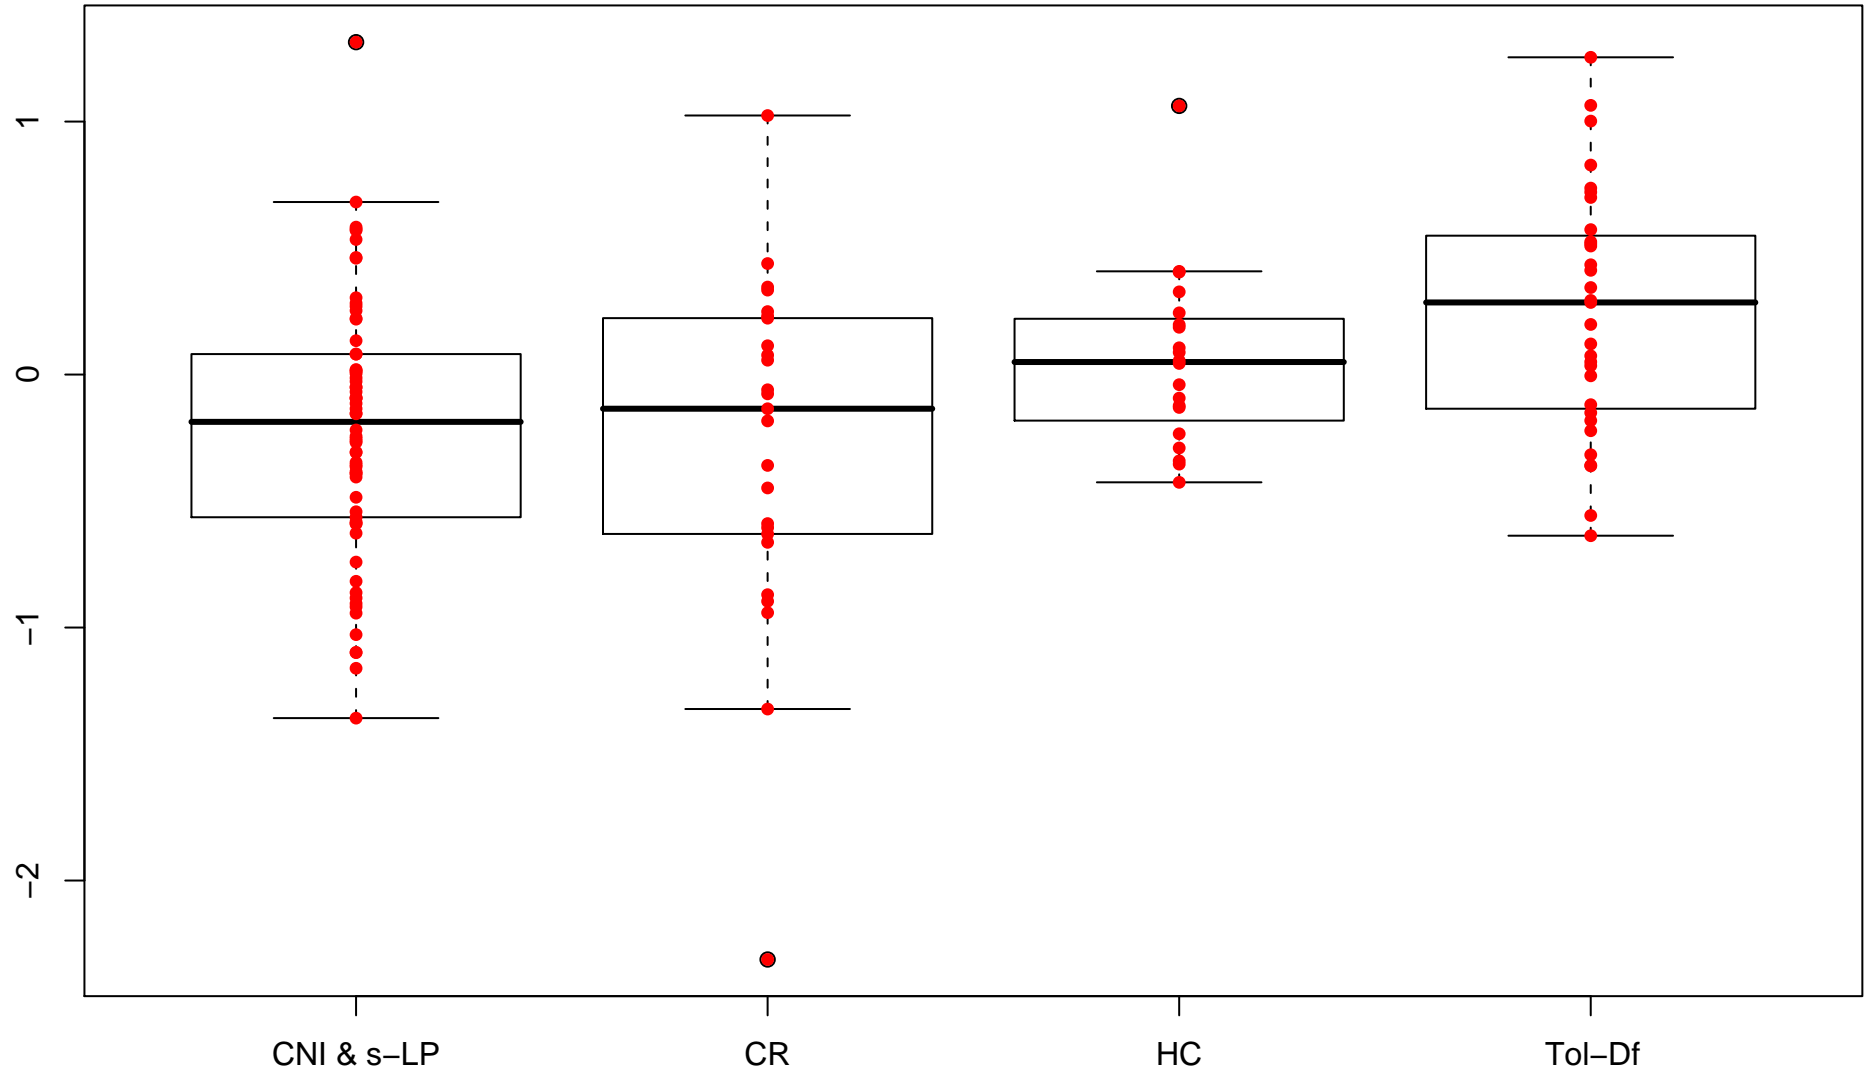

Rank 574 : TUFT1  
0.0003782

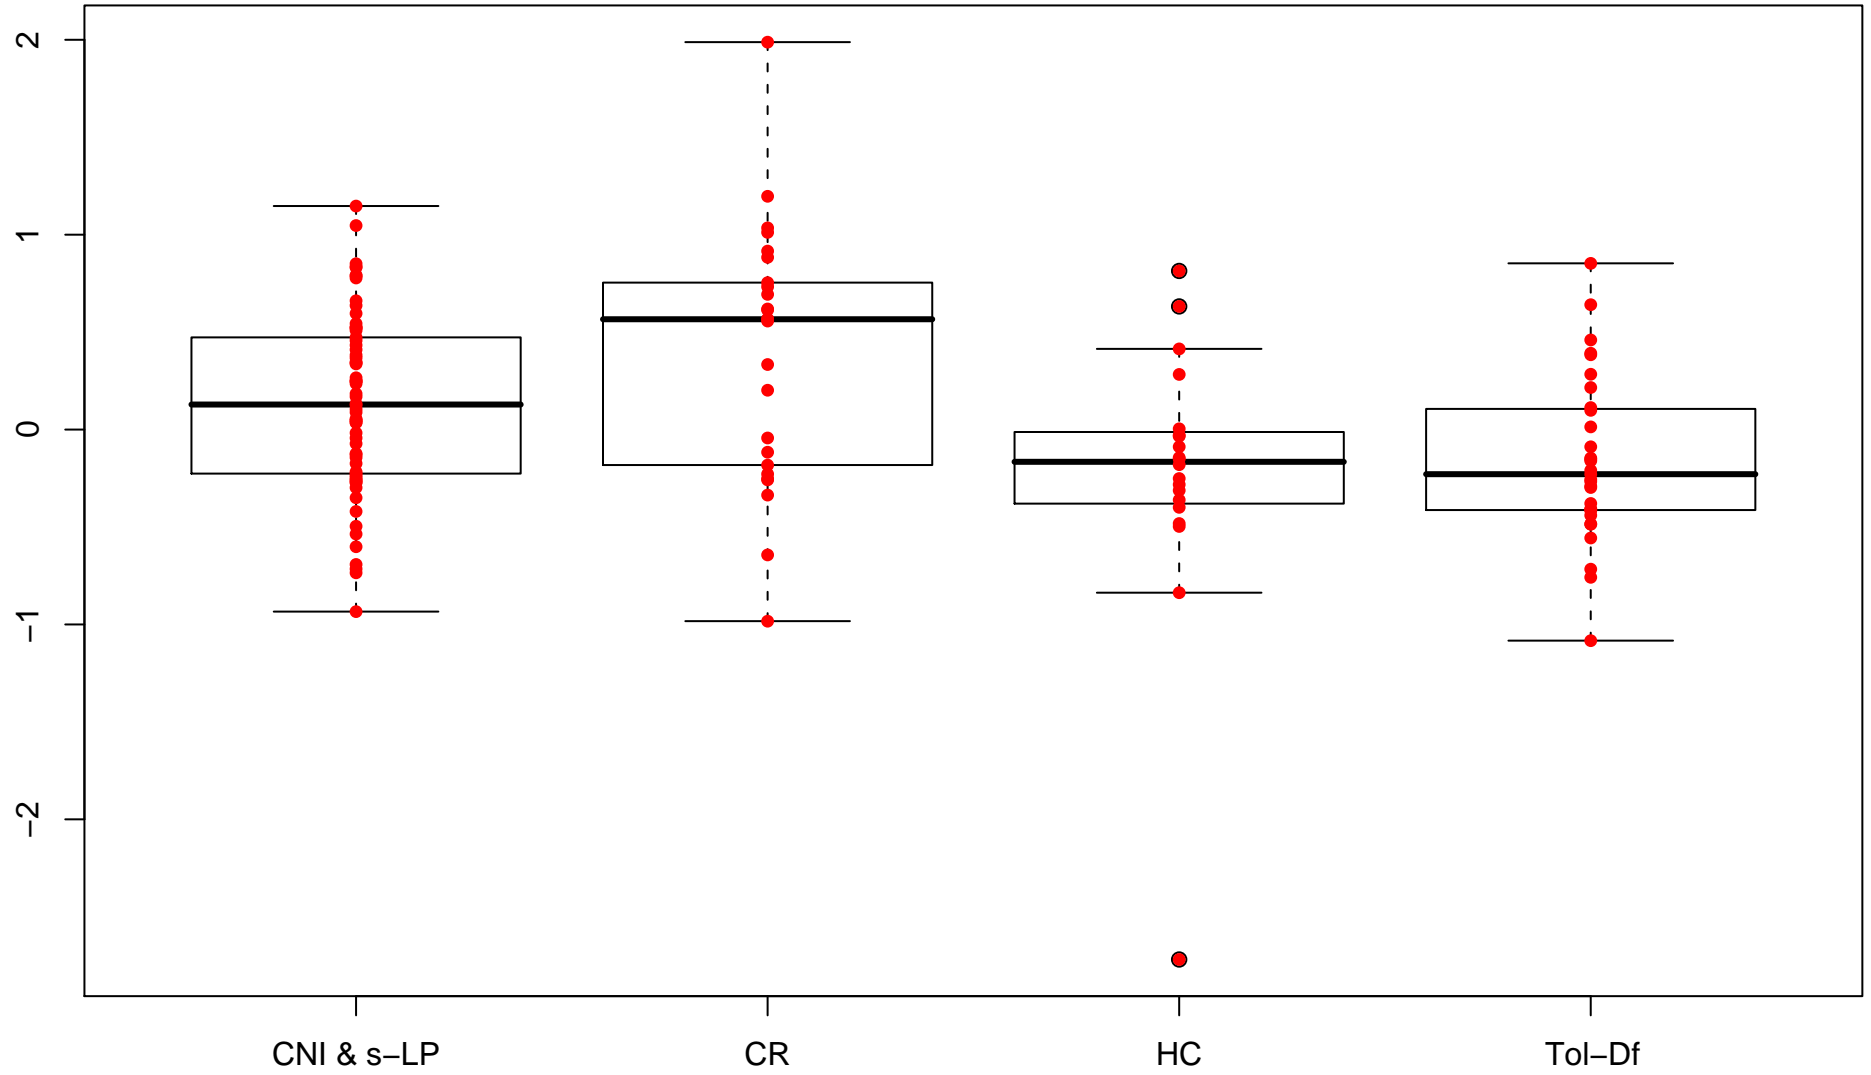

Rank 575 : CCR6  
0.0003821

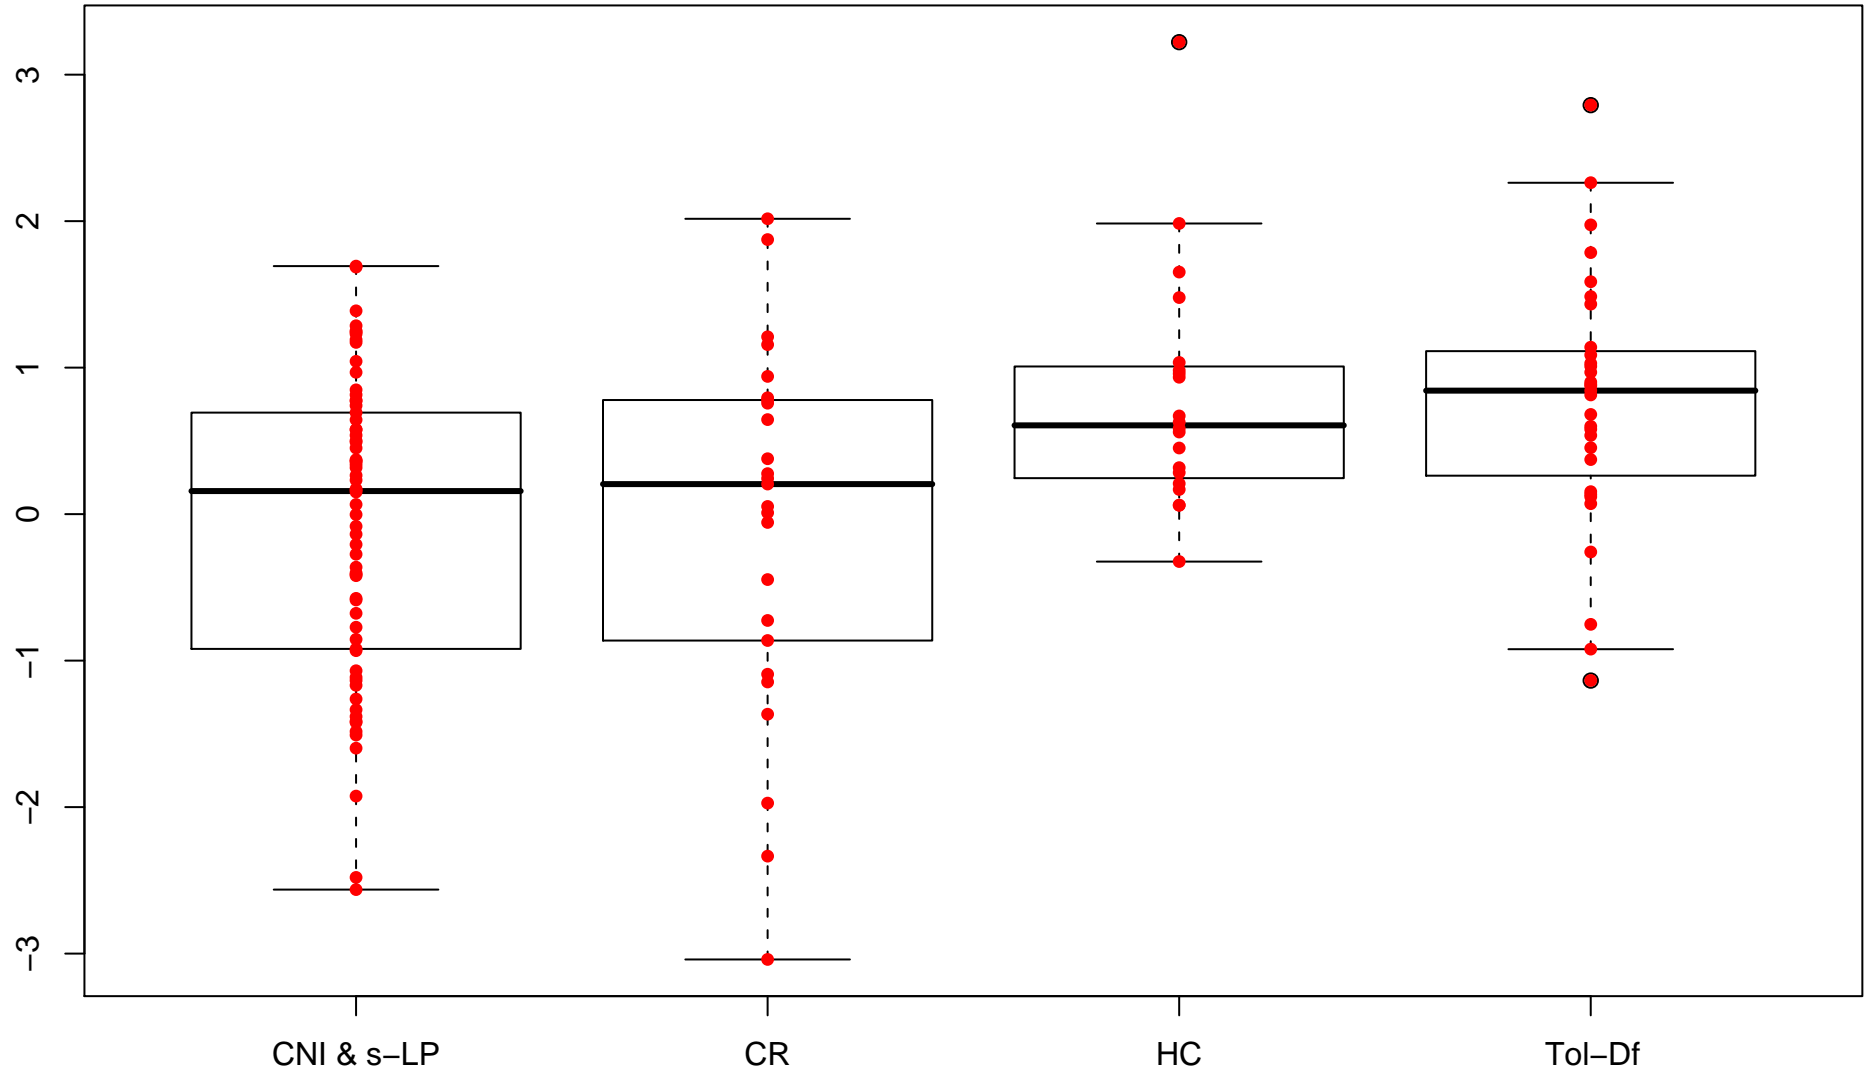



Rank 576 : GCC2  
0.0003949

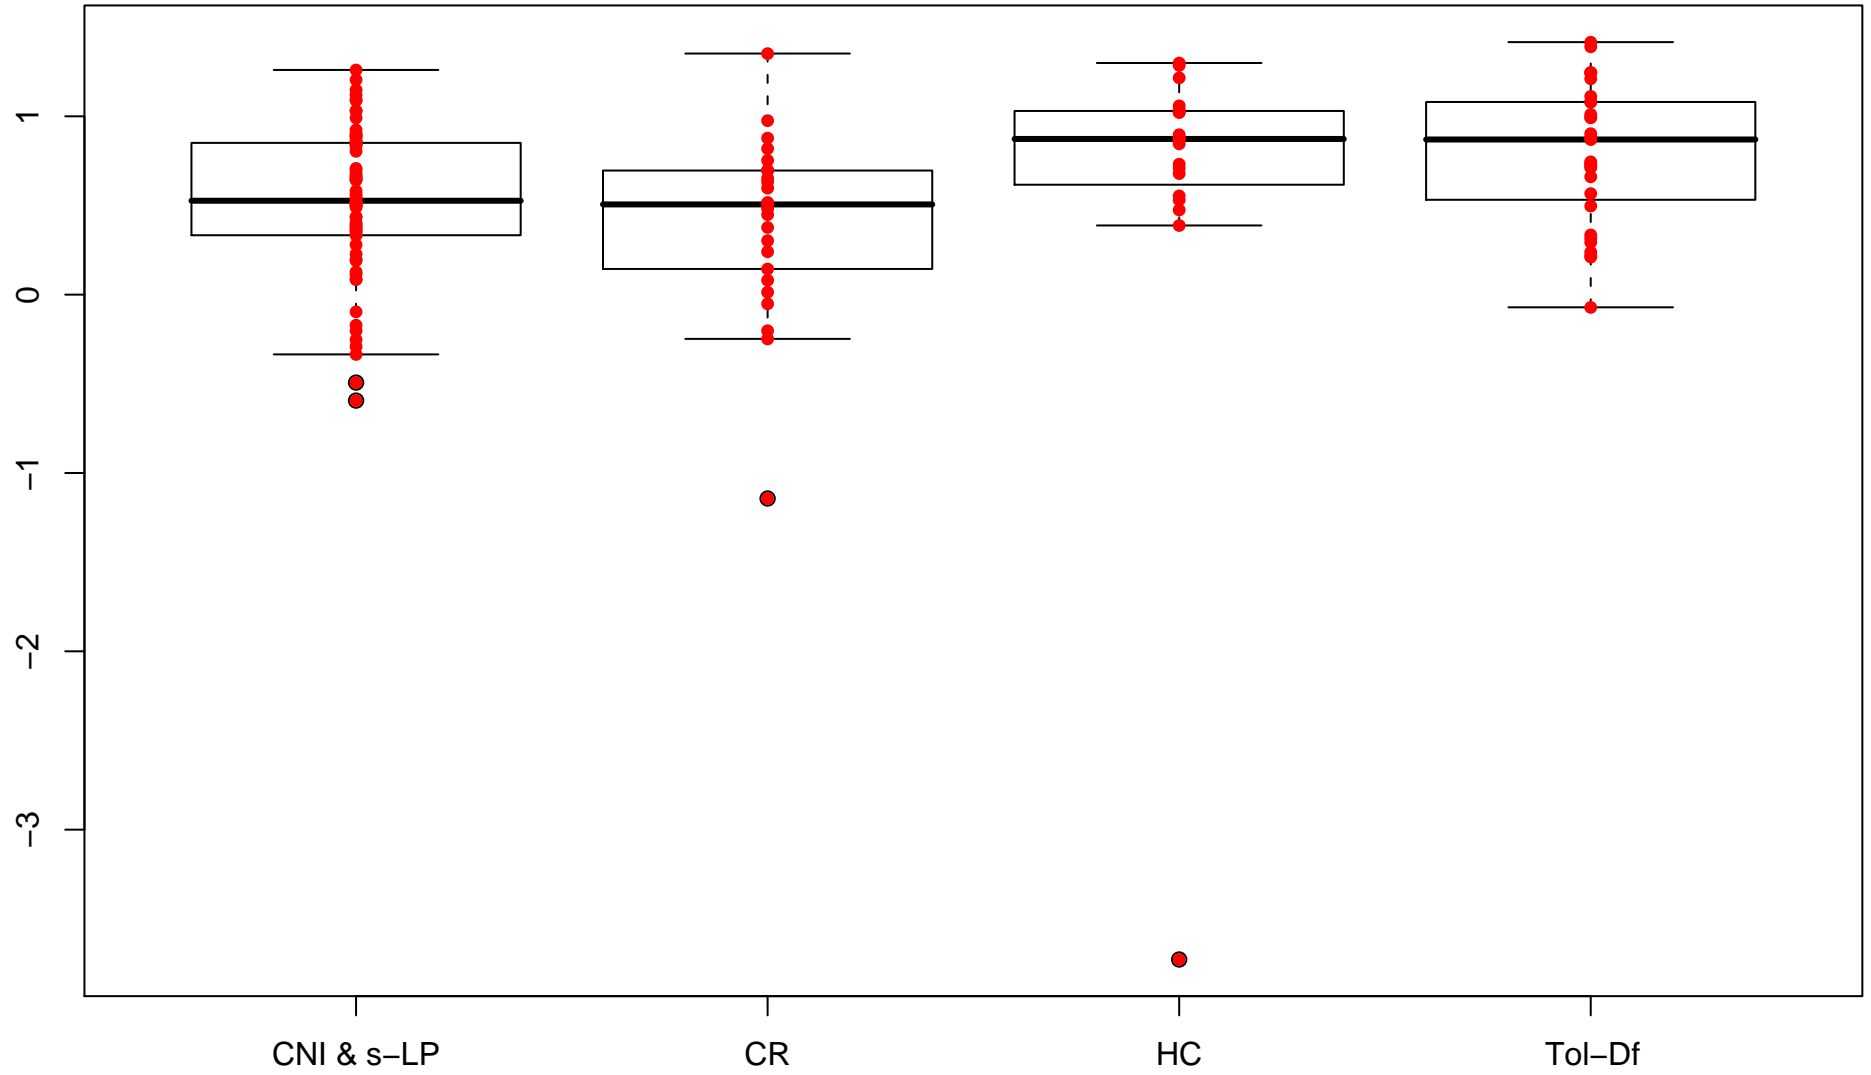

Rank 577 : ACOT2  
0.0003989

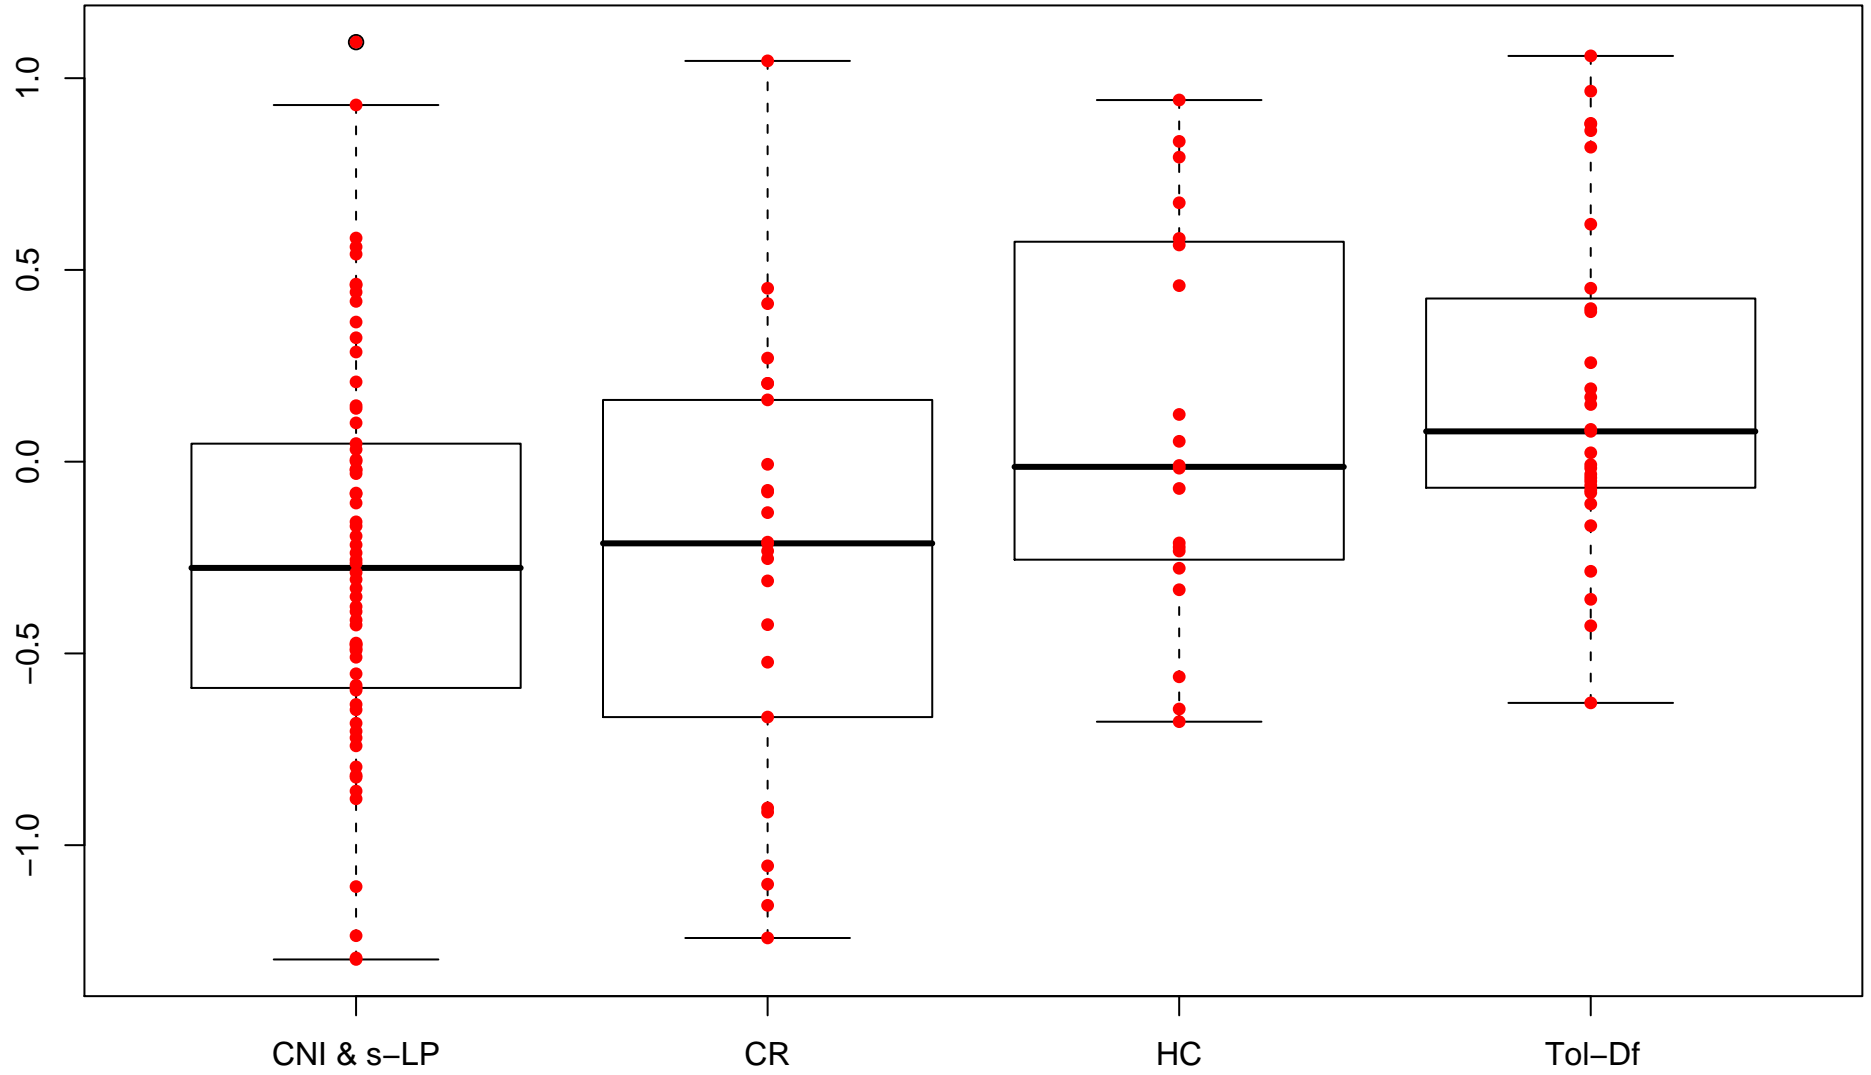

Rank 578 : C1ORF26  
0.0004012

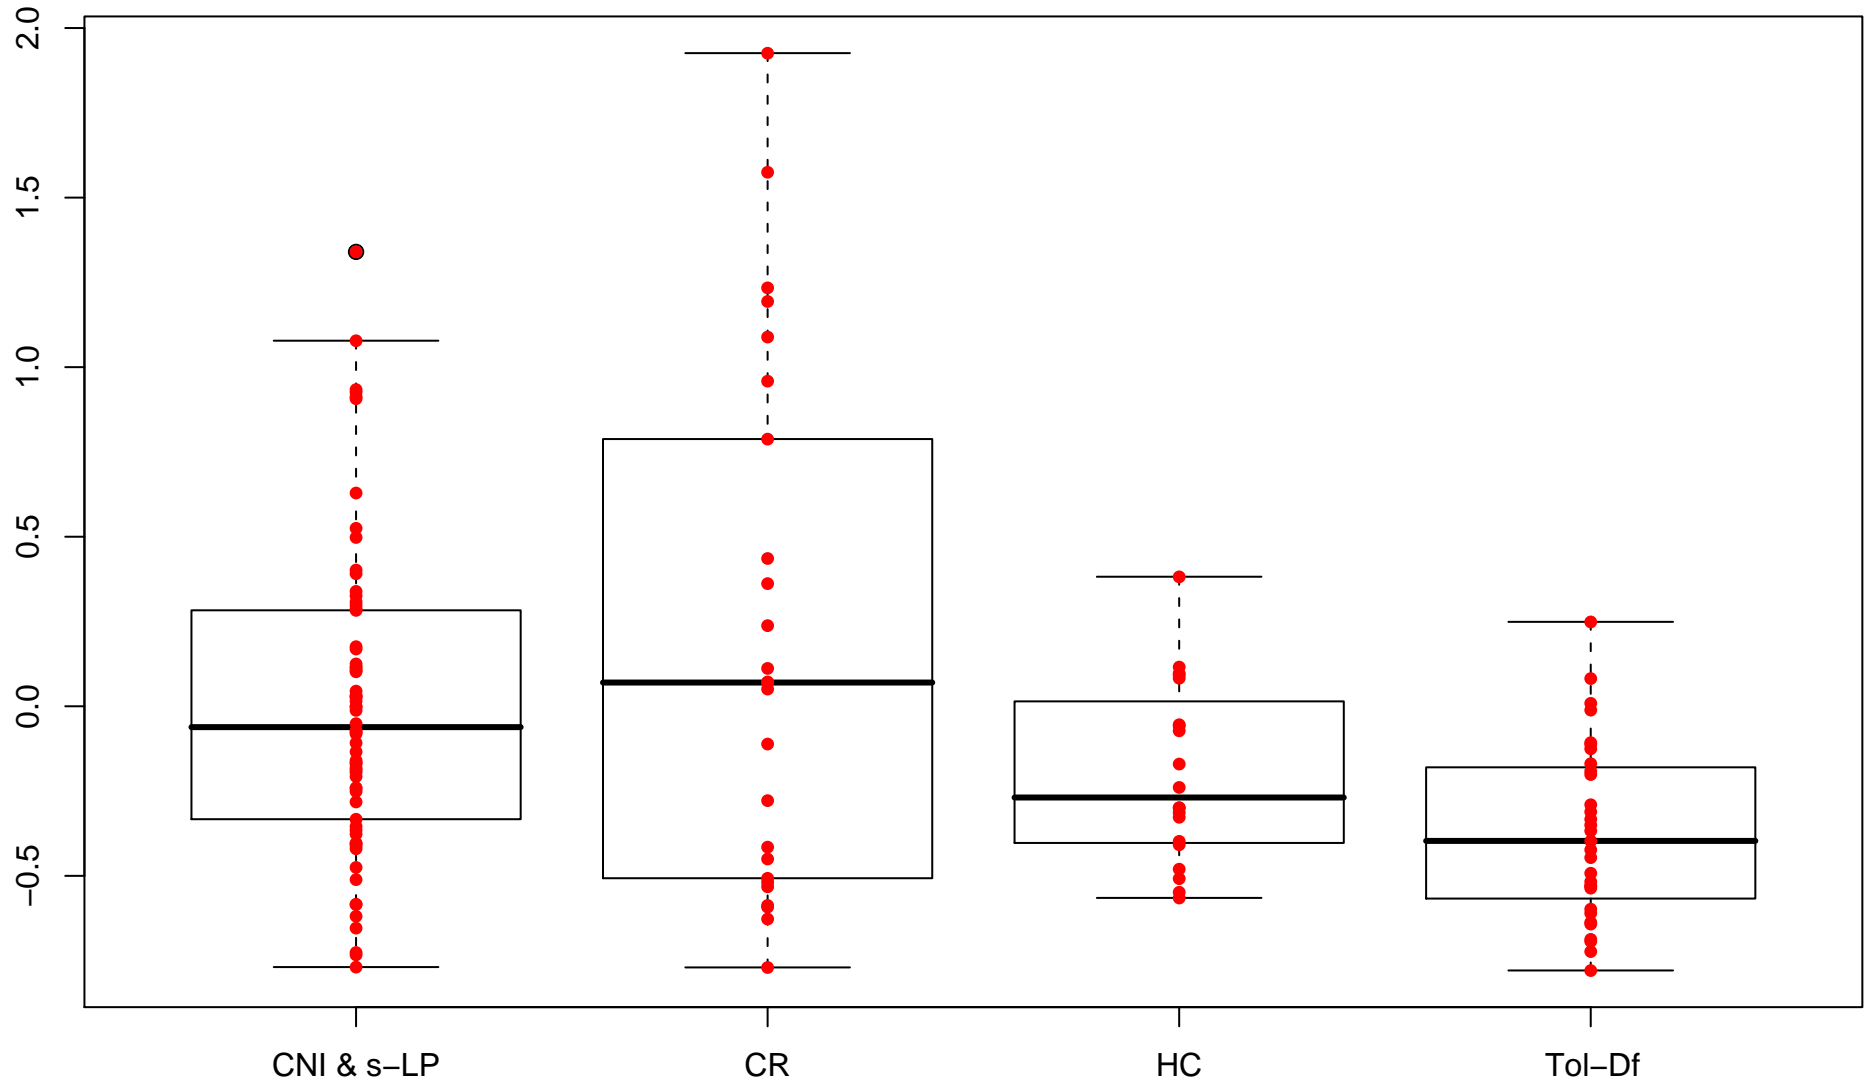

Rank 579 : PCNA  
0.0004023

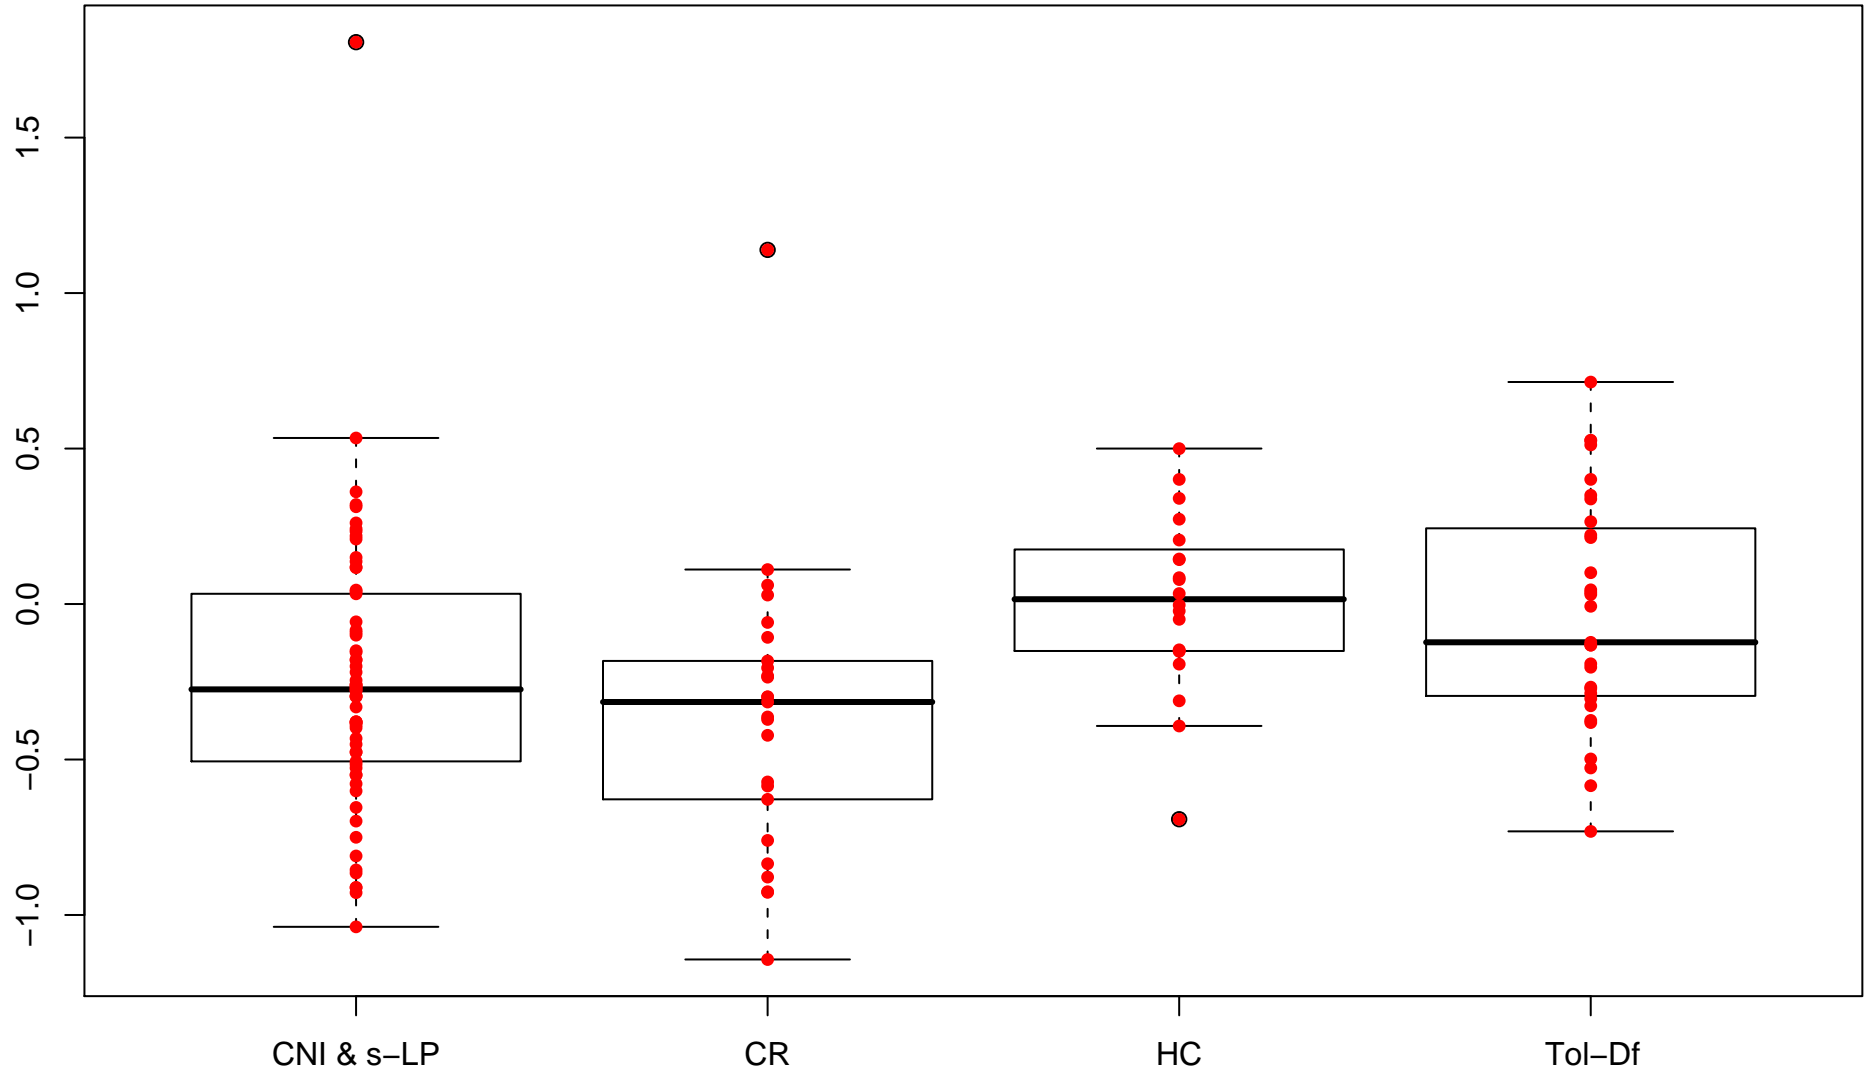

Rank 580 : IL2RB  
0.0004114

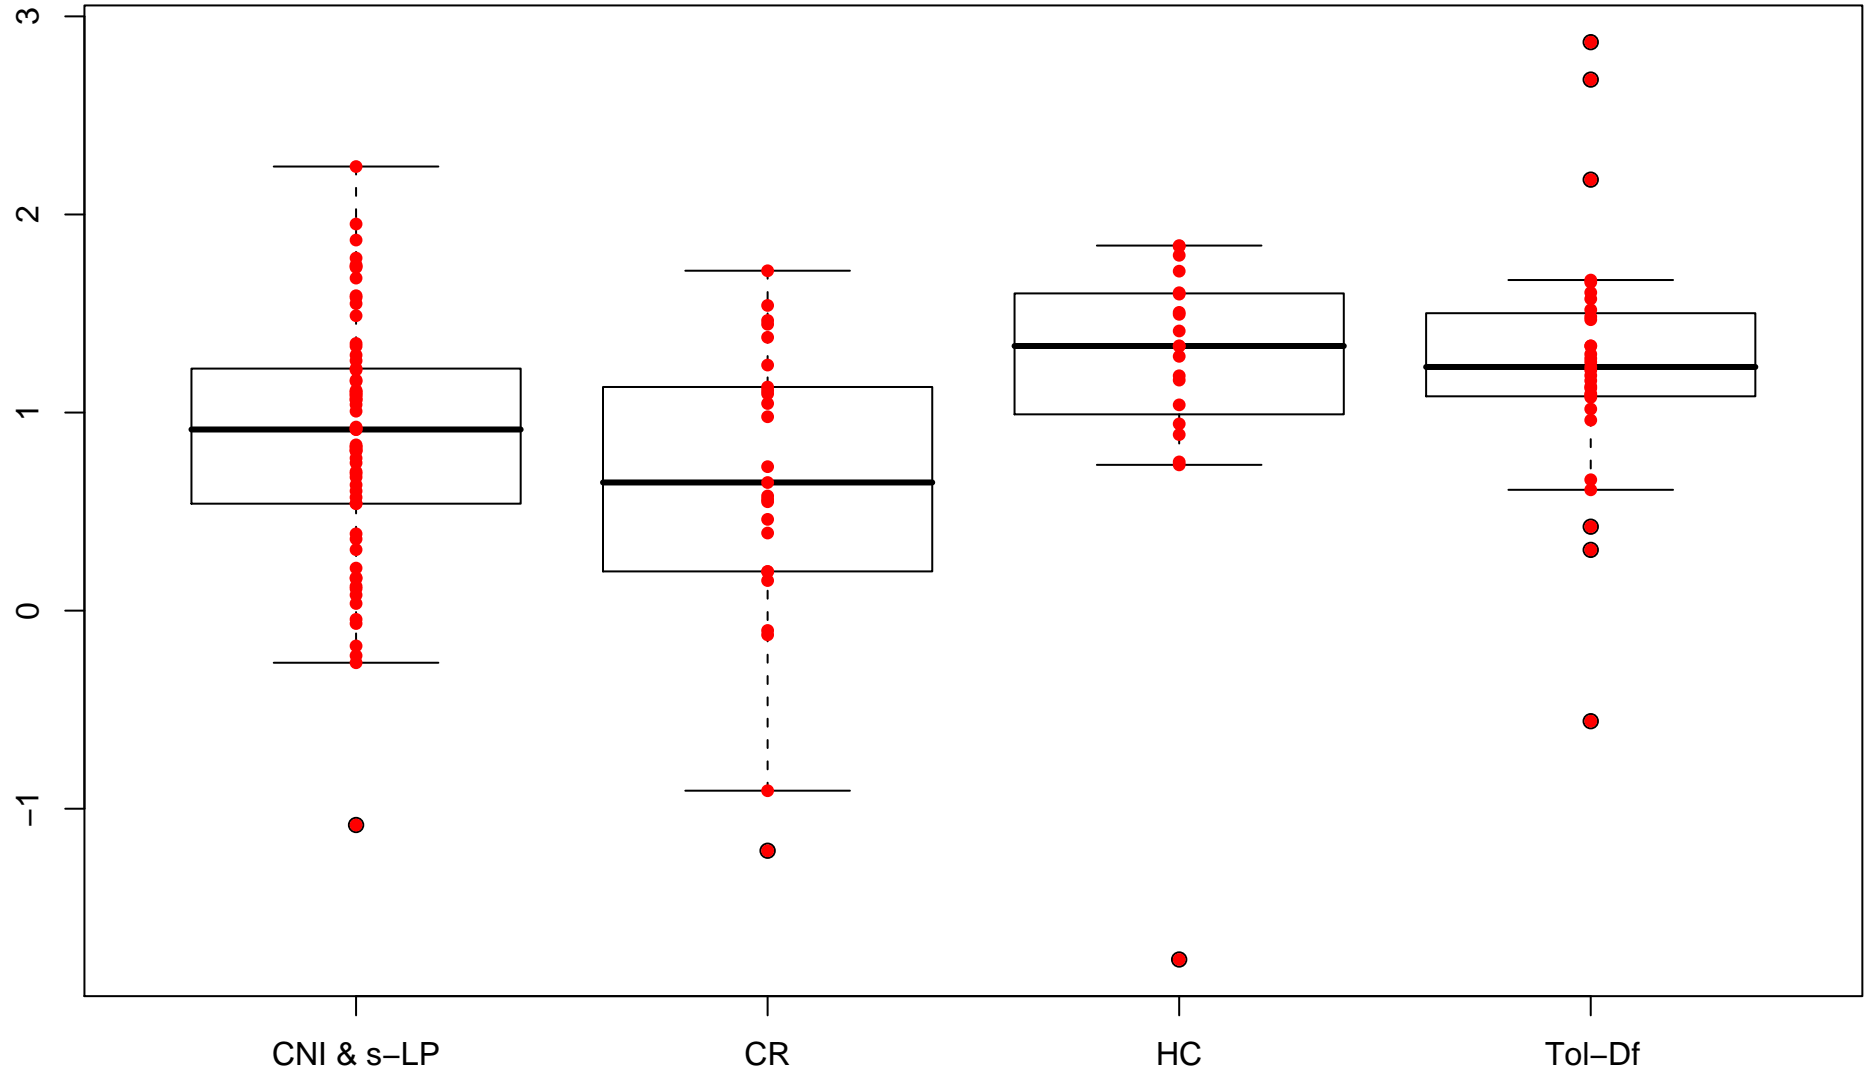

Rank 581 : CCDC98;MRPS18C  
0.0004128

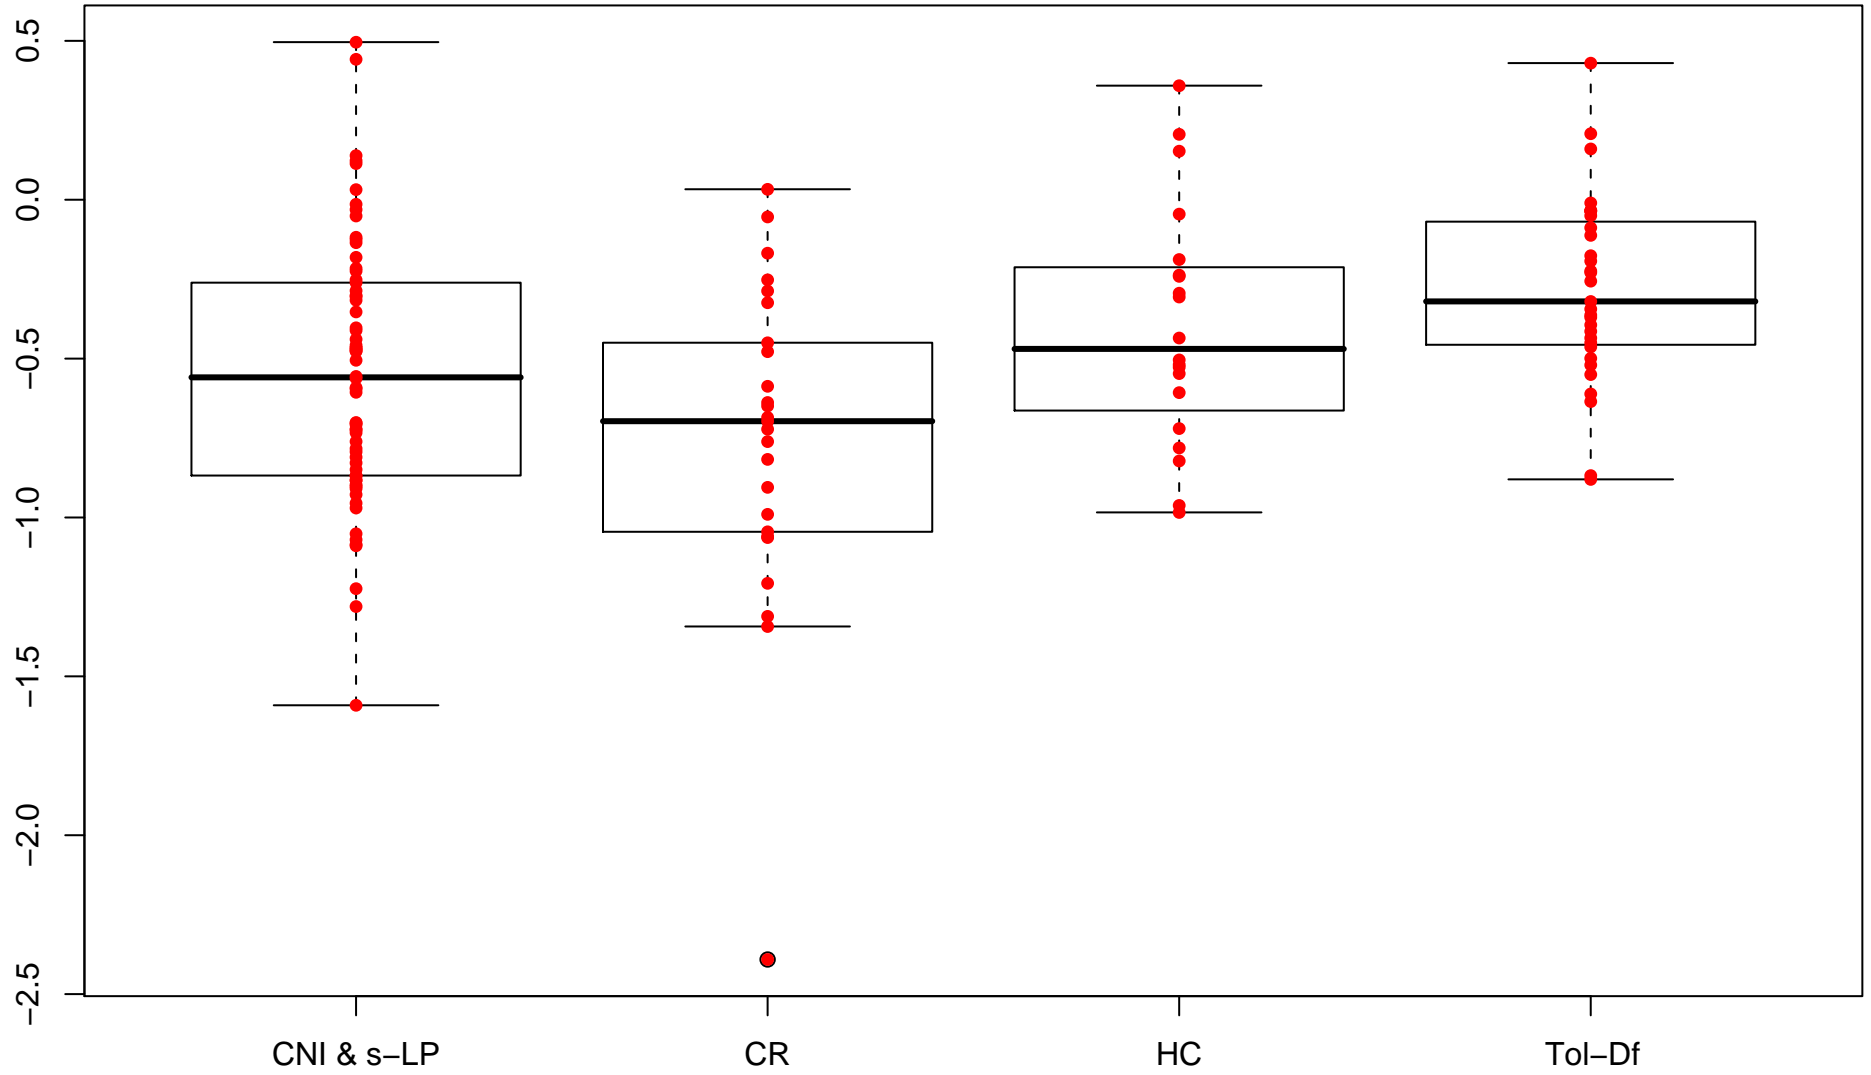

Rank 582 : GATA3  
0.0004143

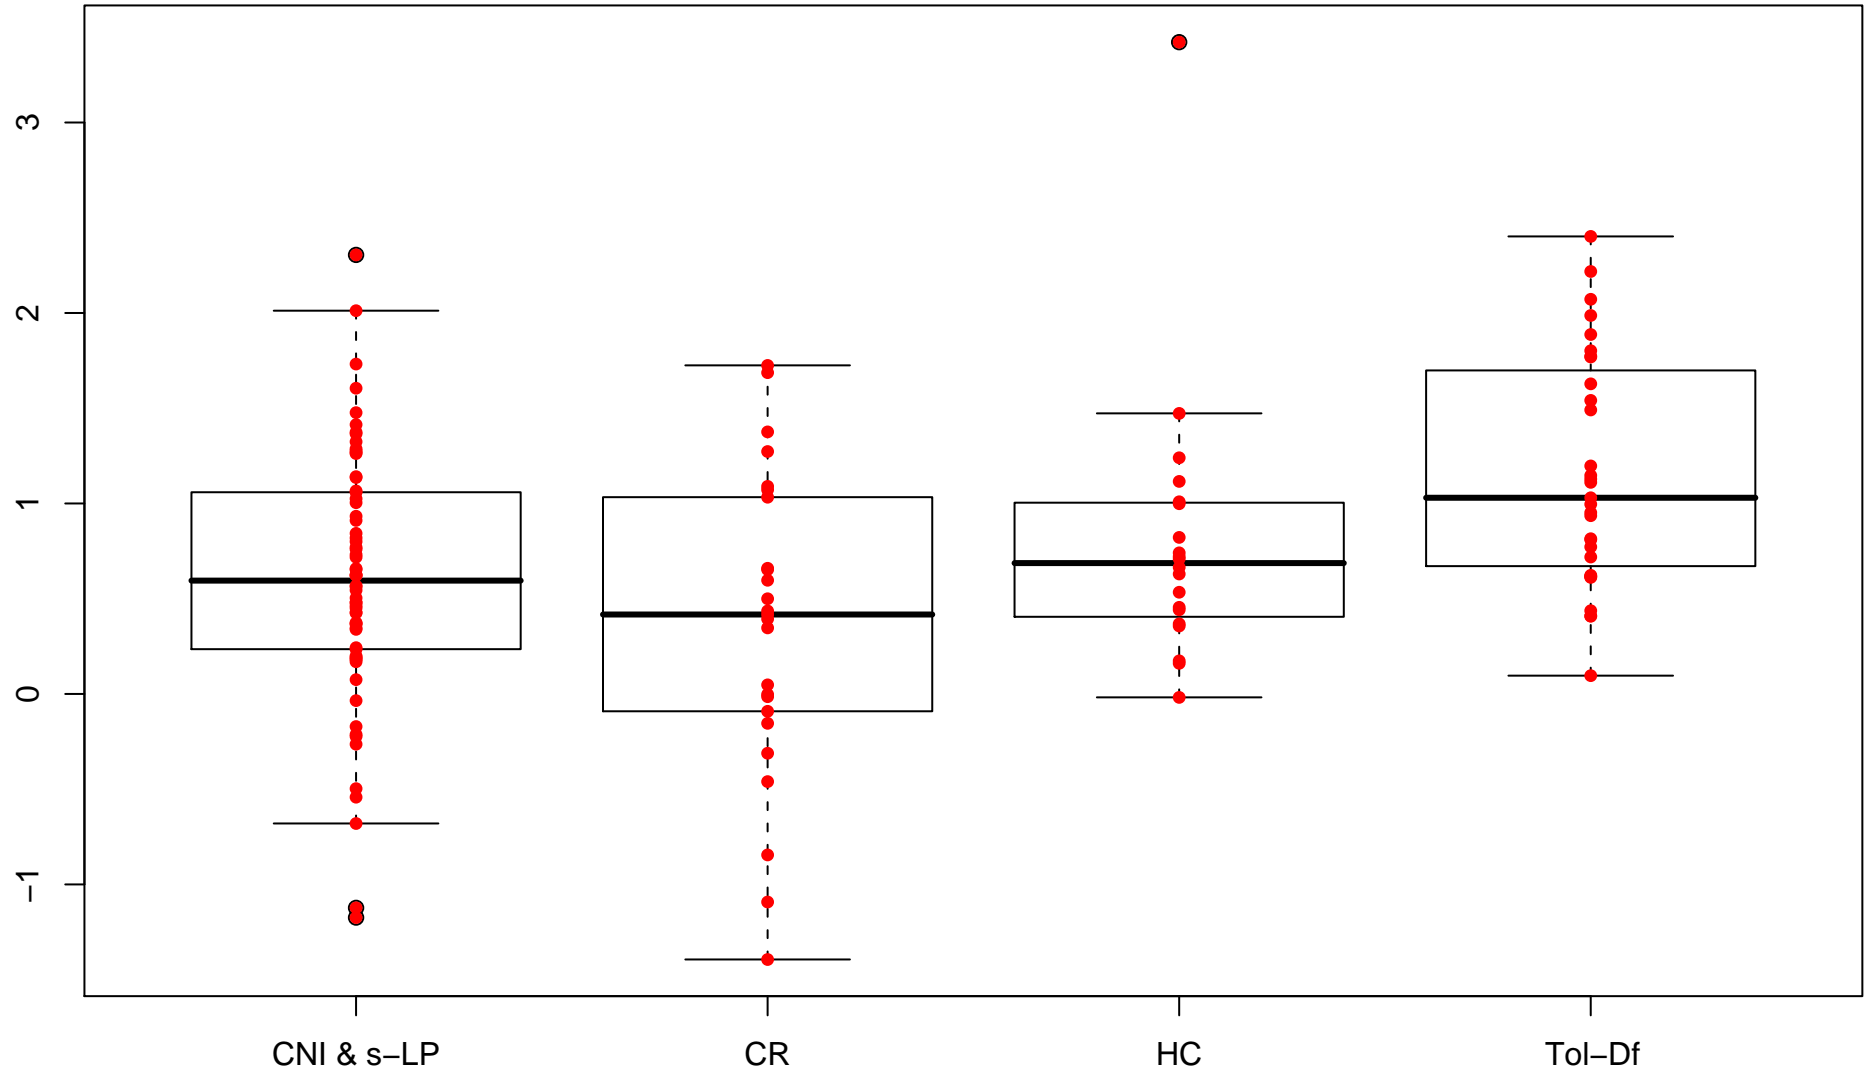

Rank 583 : ALDH4A1  
0.0004151

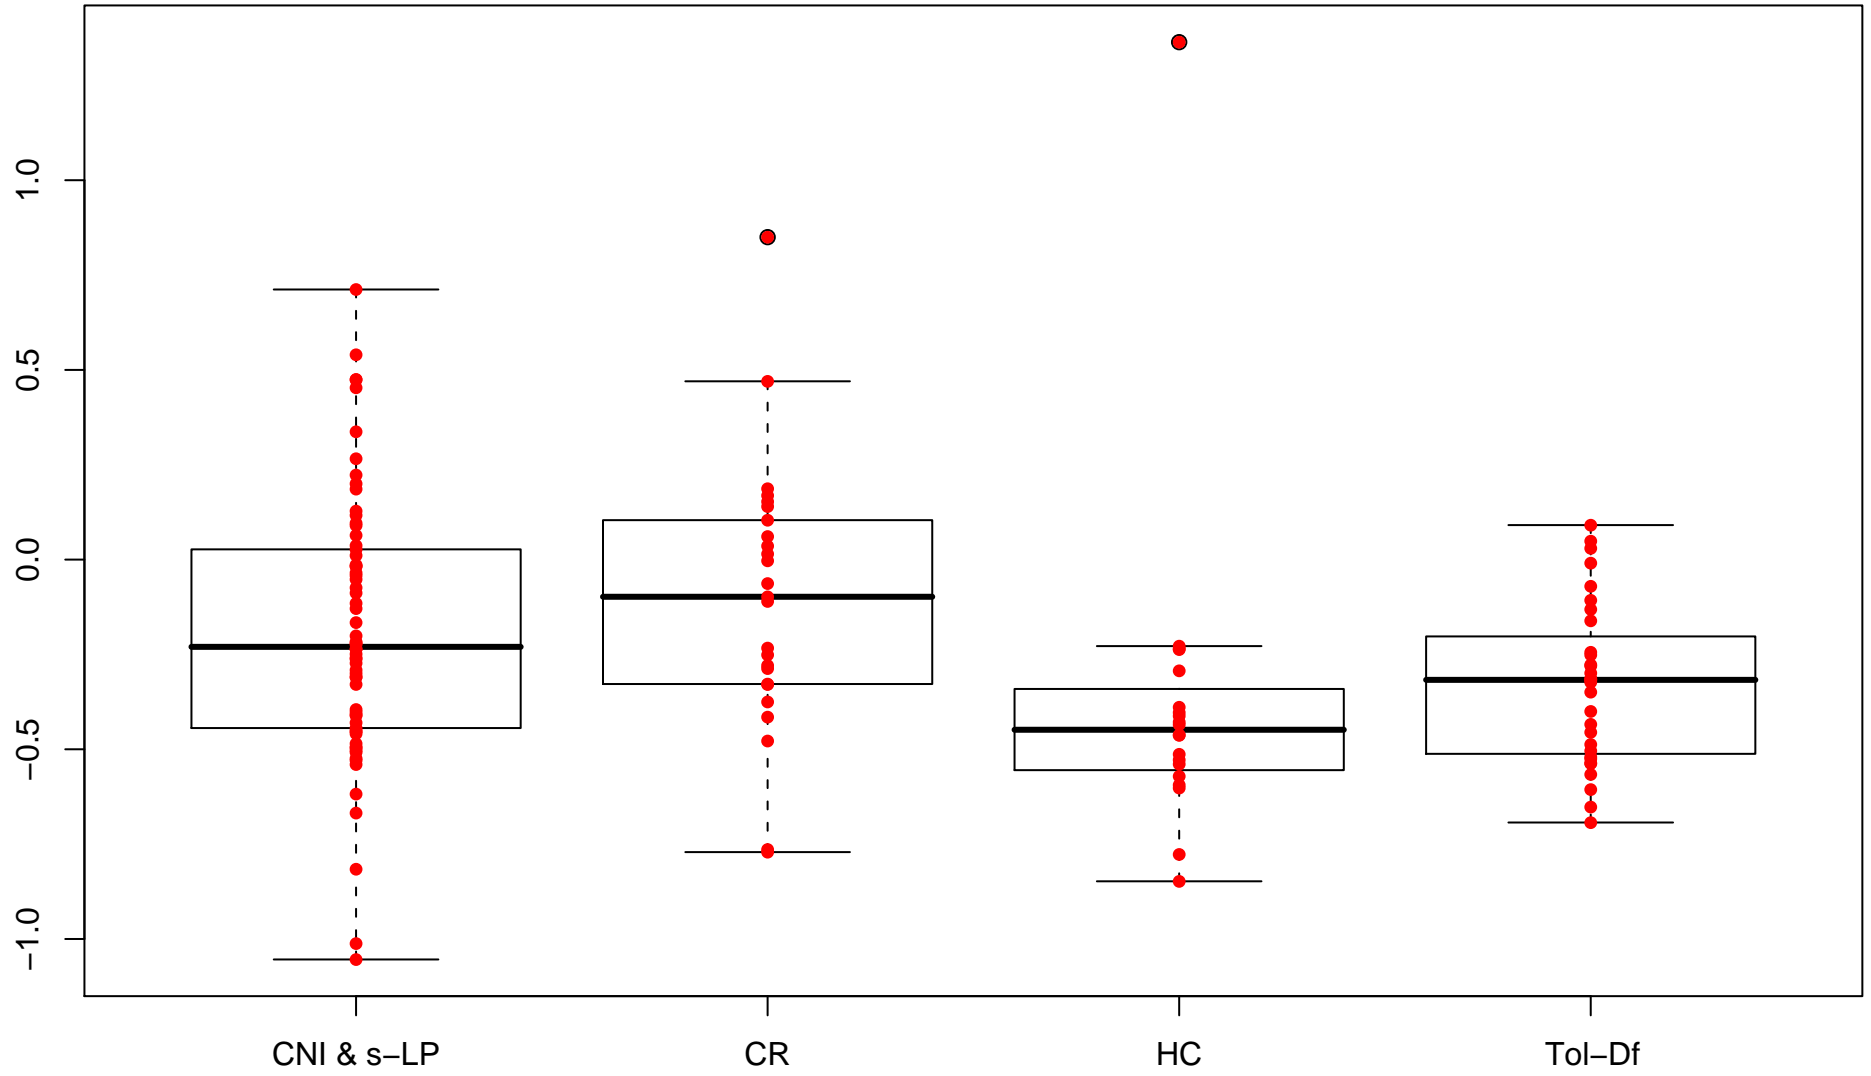



Rank 584 : AI378923  
0.0004182

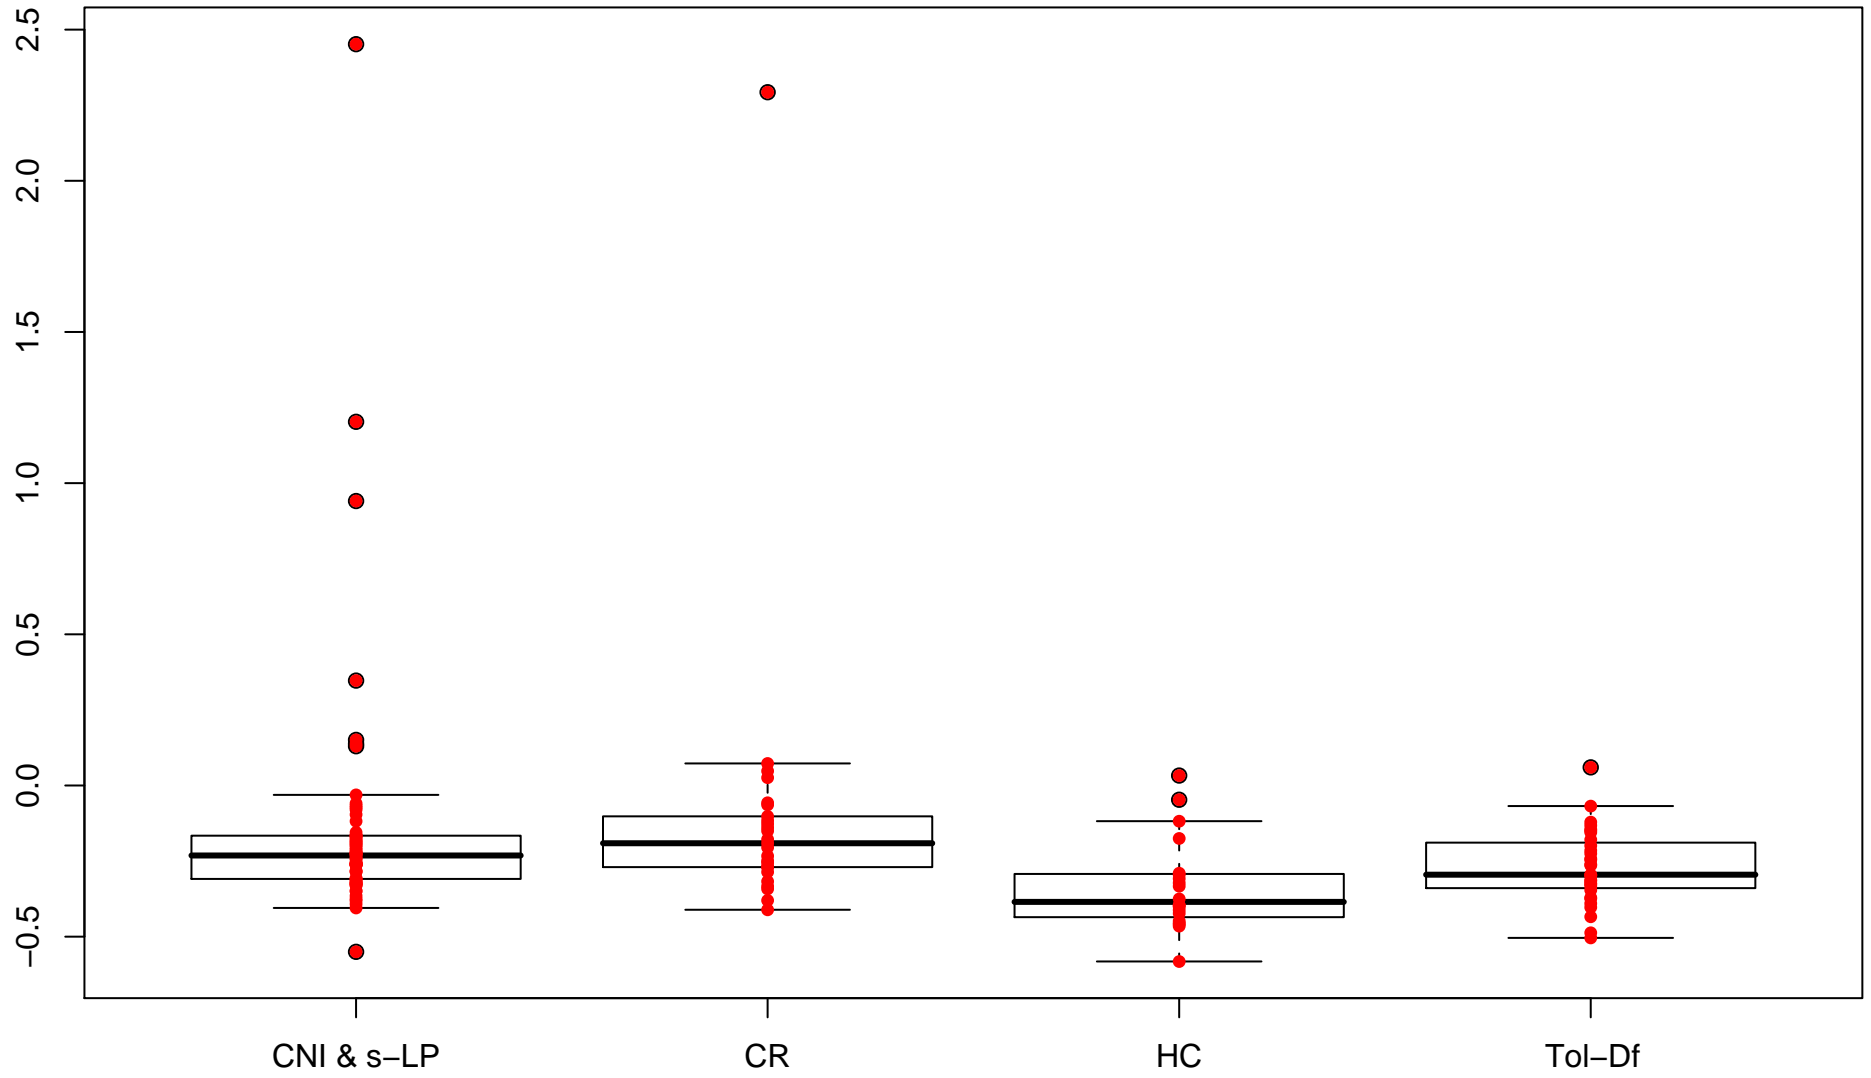

Rank 585 : APEX1  
0.000422

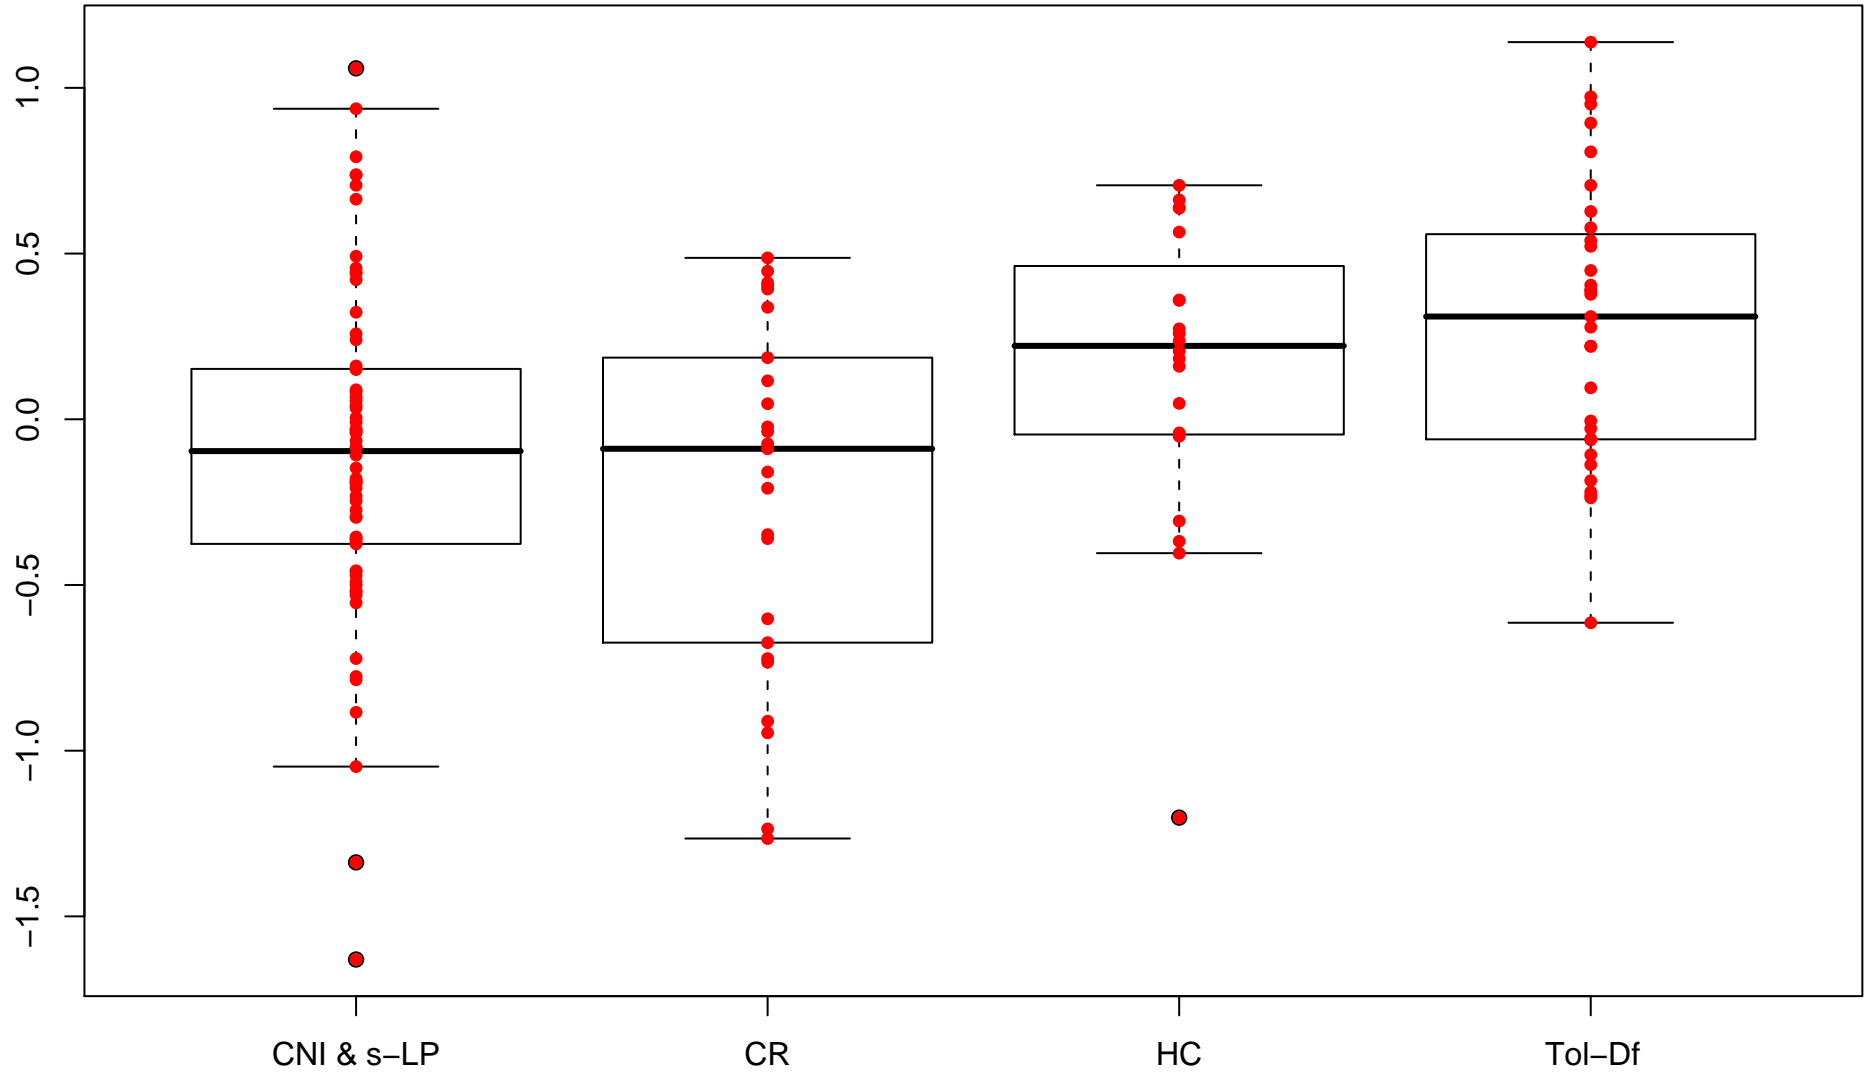

Rank 586 : ZNF547  
0.0004257

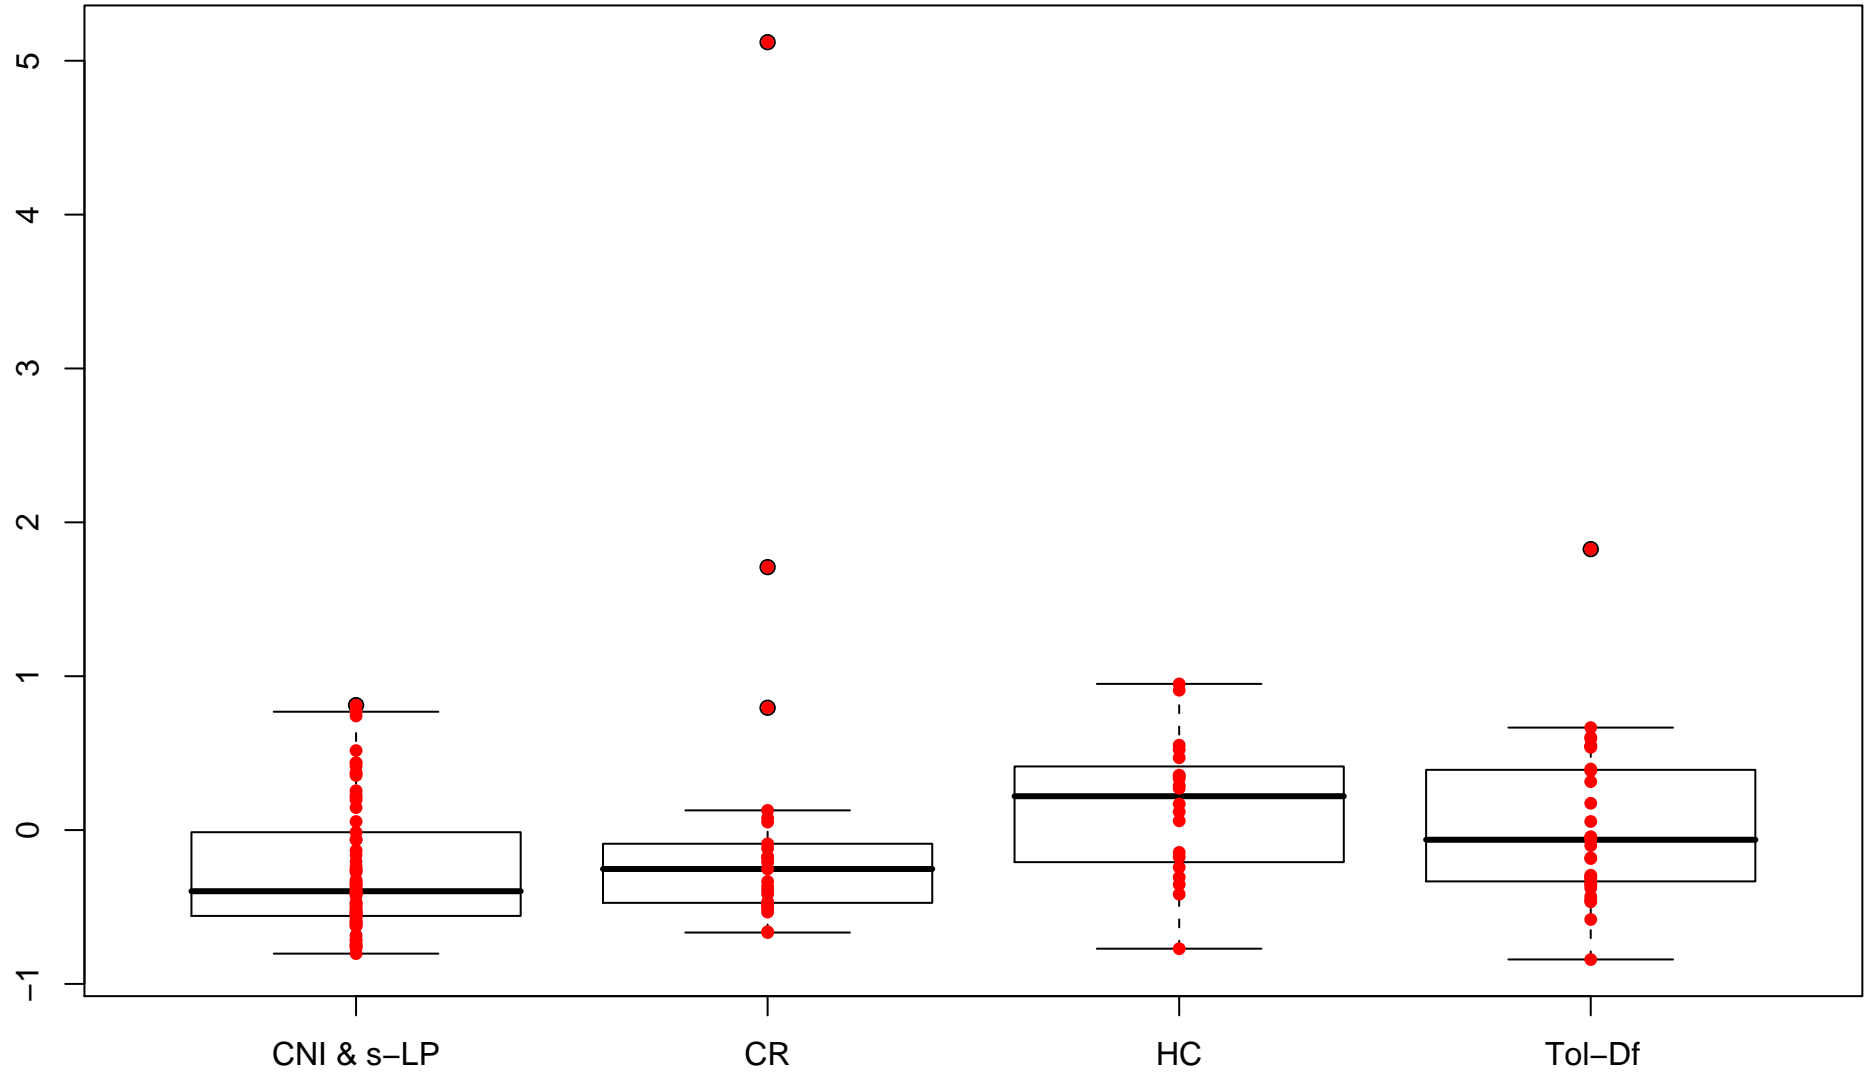

Rank 587 : MAL  
0.0004277

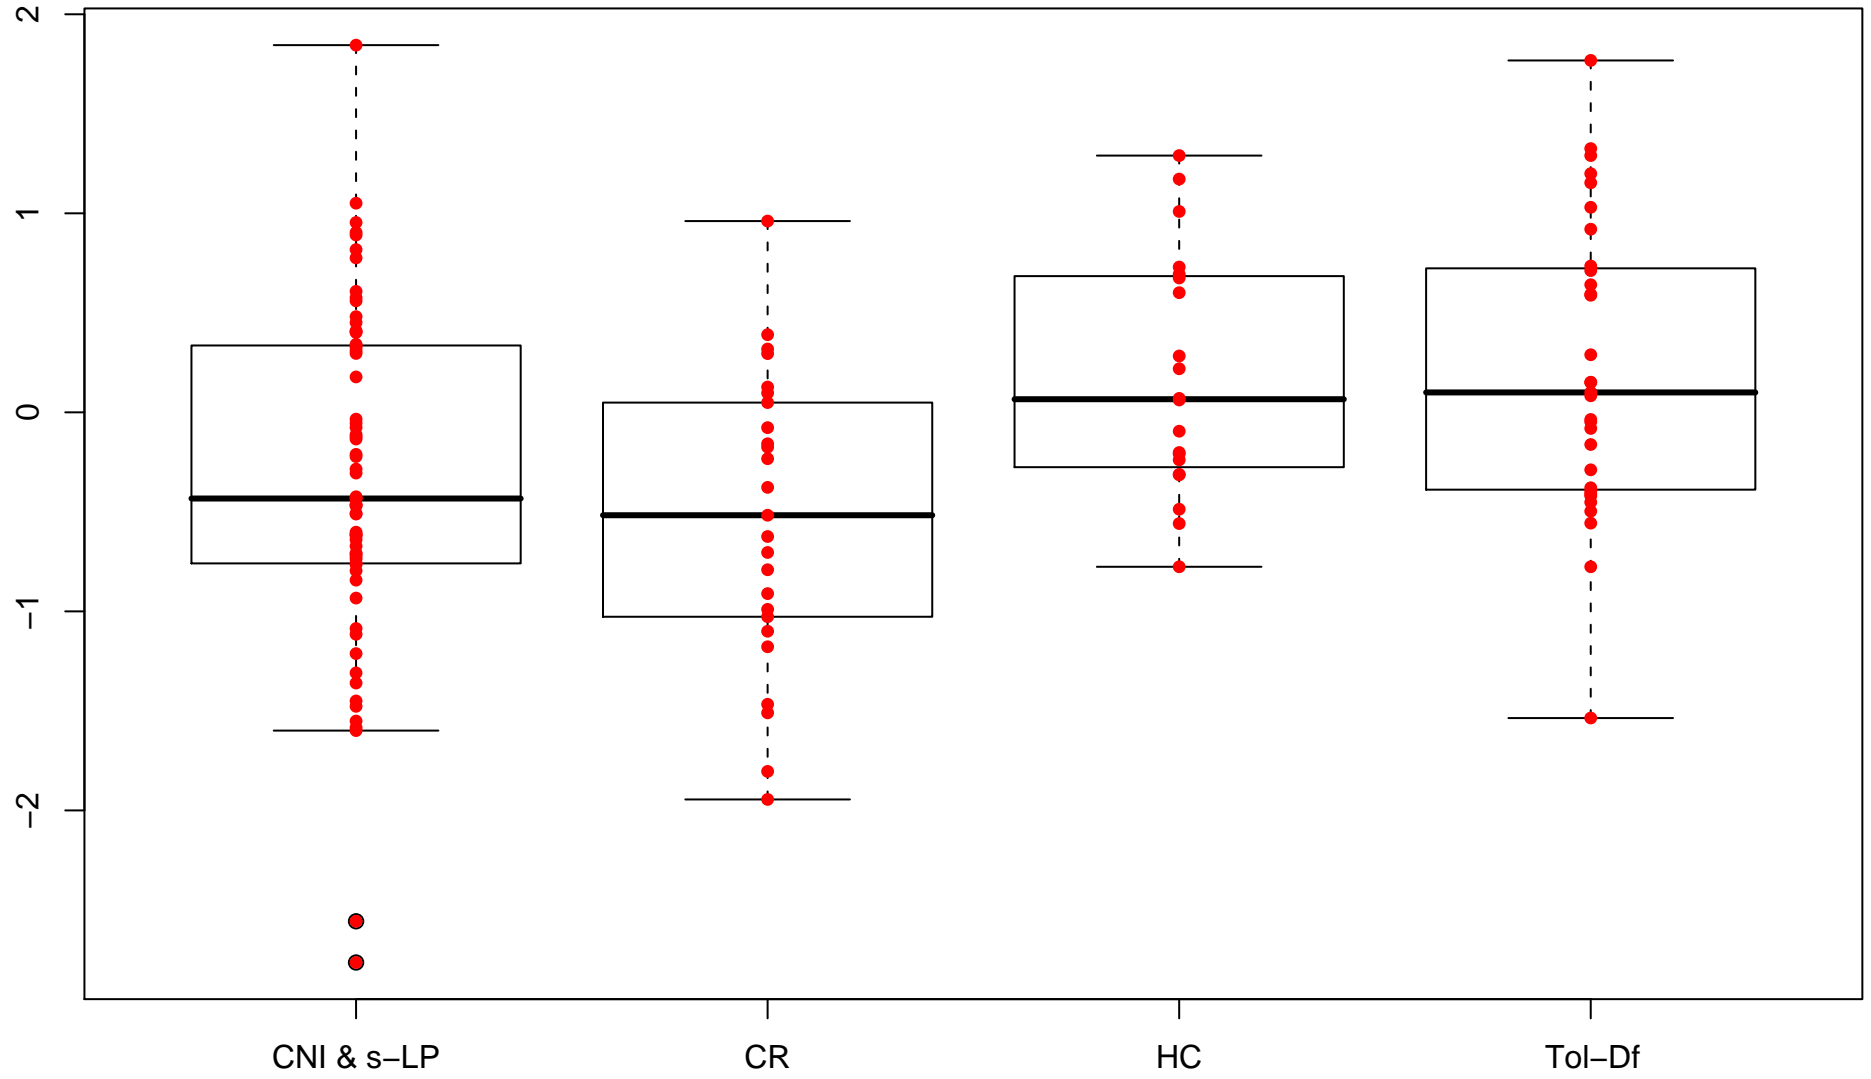

Rank 588 : FN1  
0.0004297

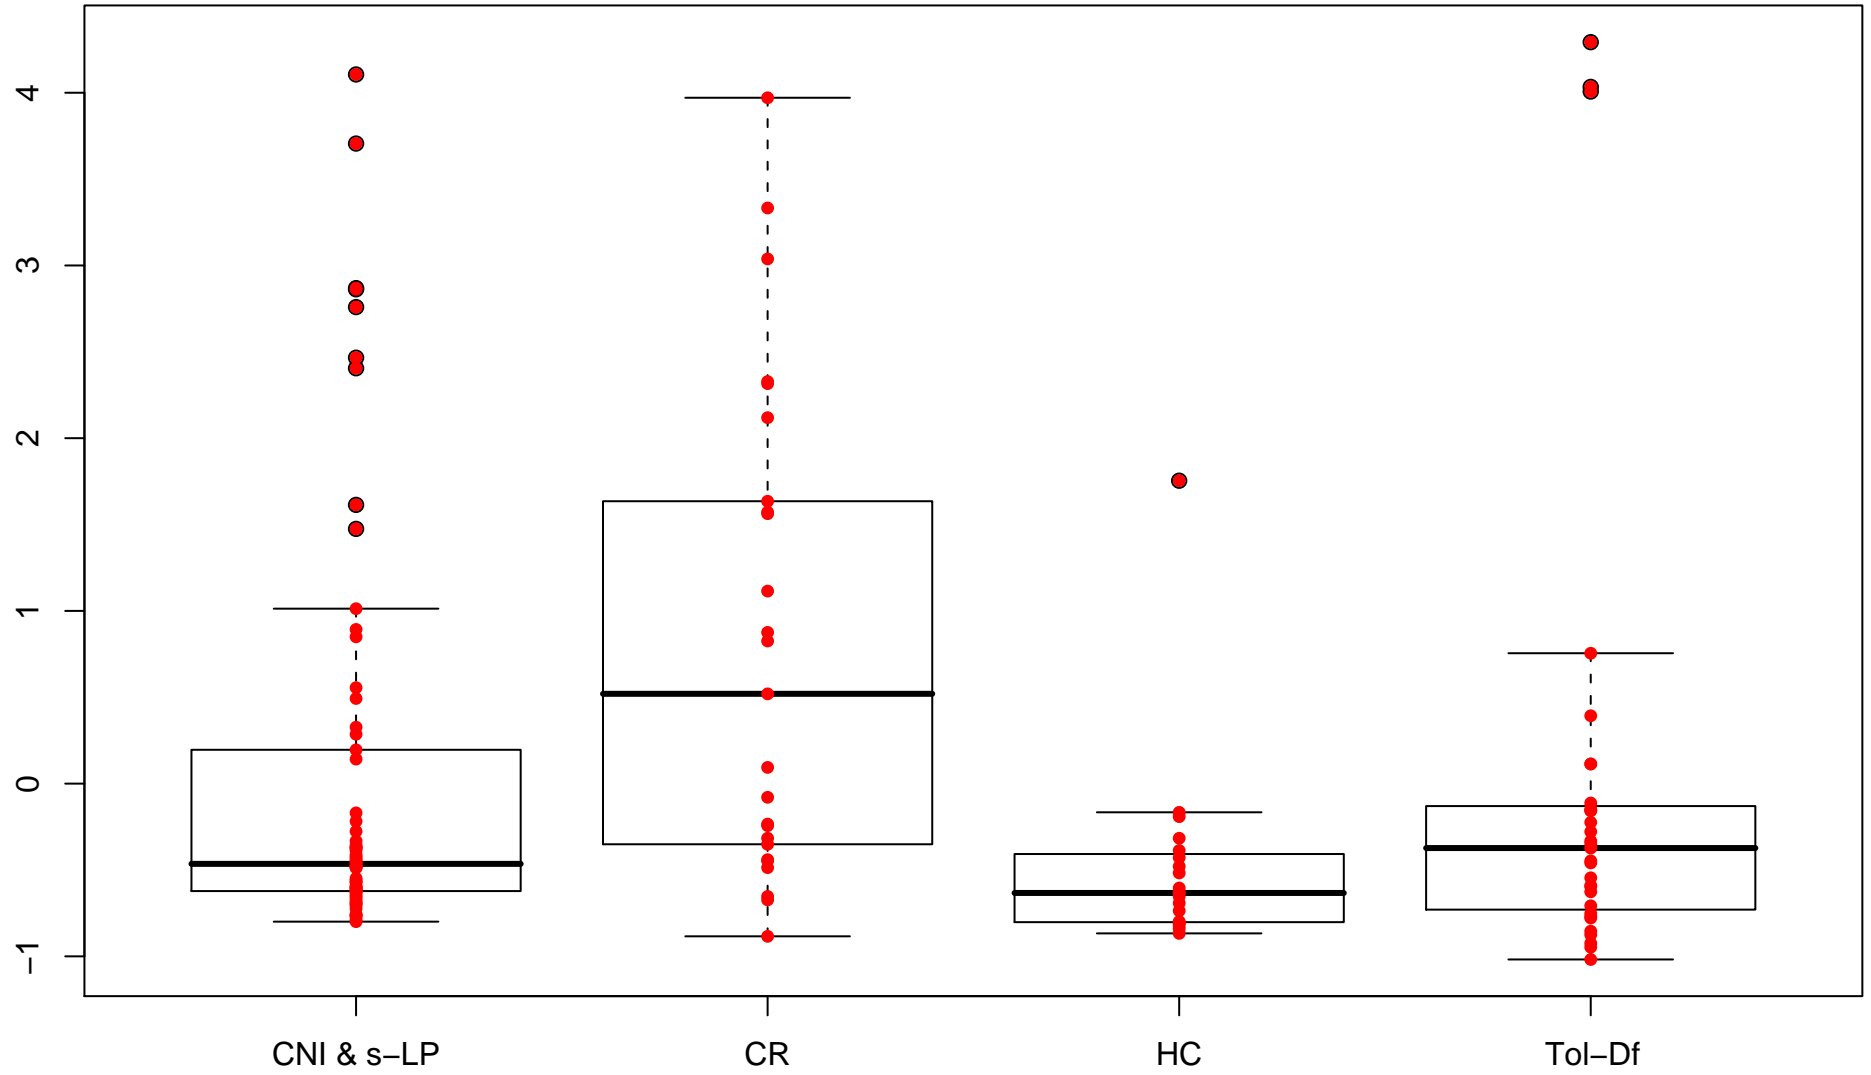

Rank 589 : KIF3A  
0.000438

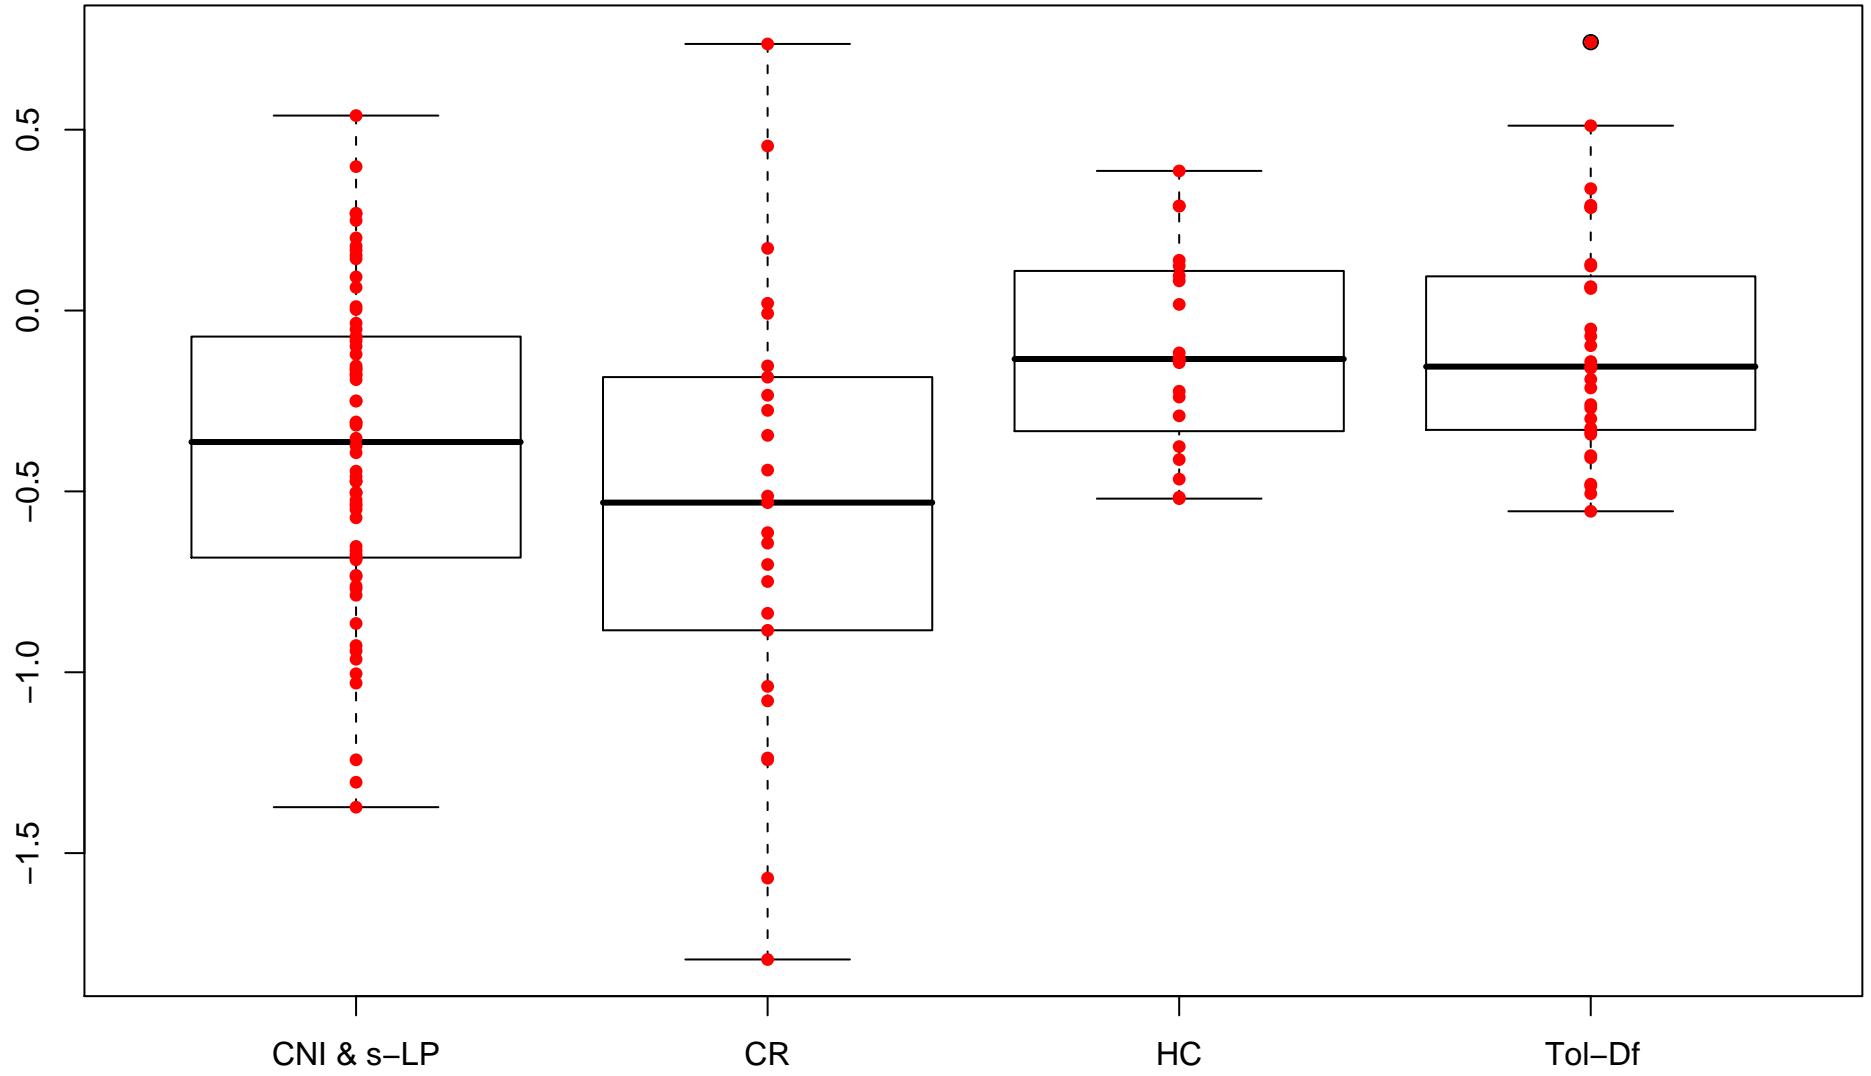

Rank 590 : FAIM  
0.0004389

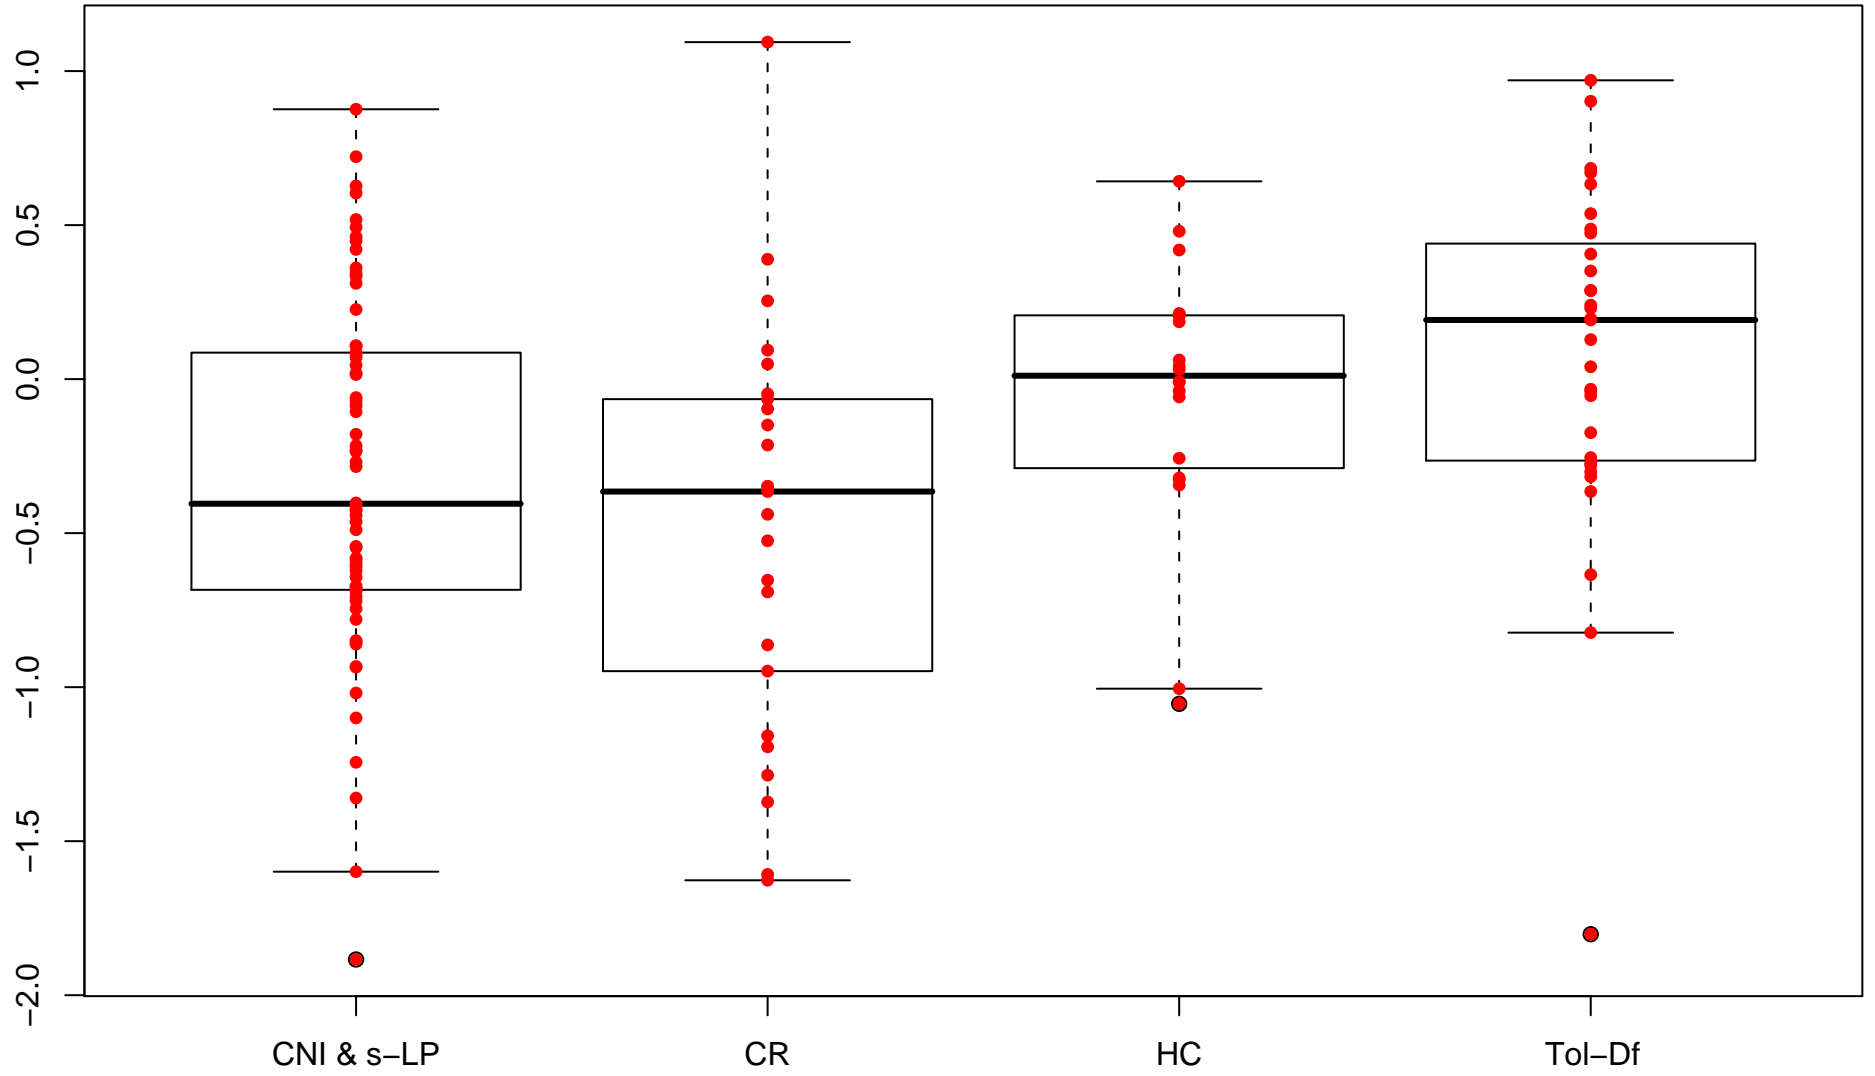

Rank 591 : CAD  
0.00044

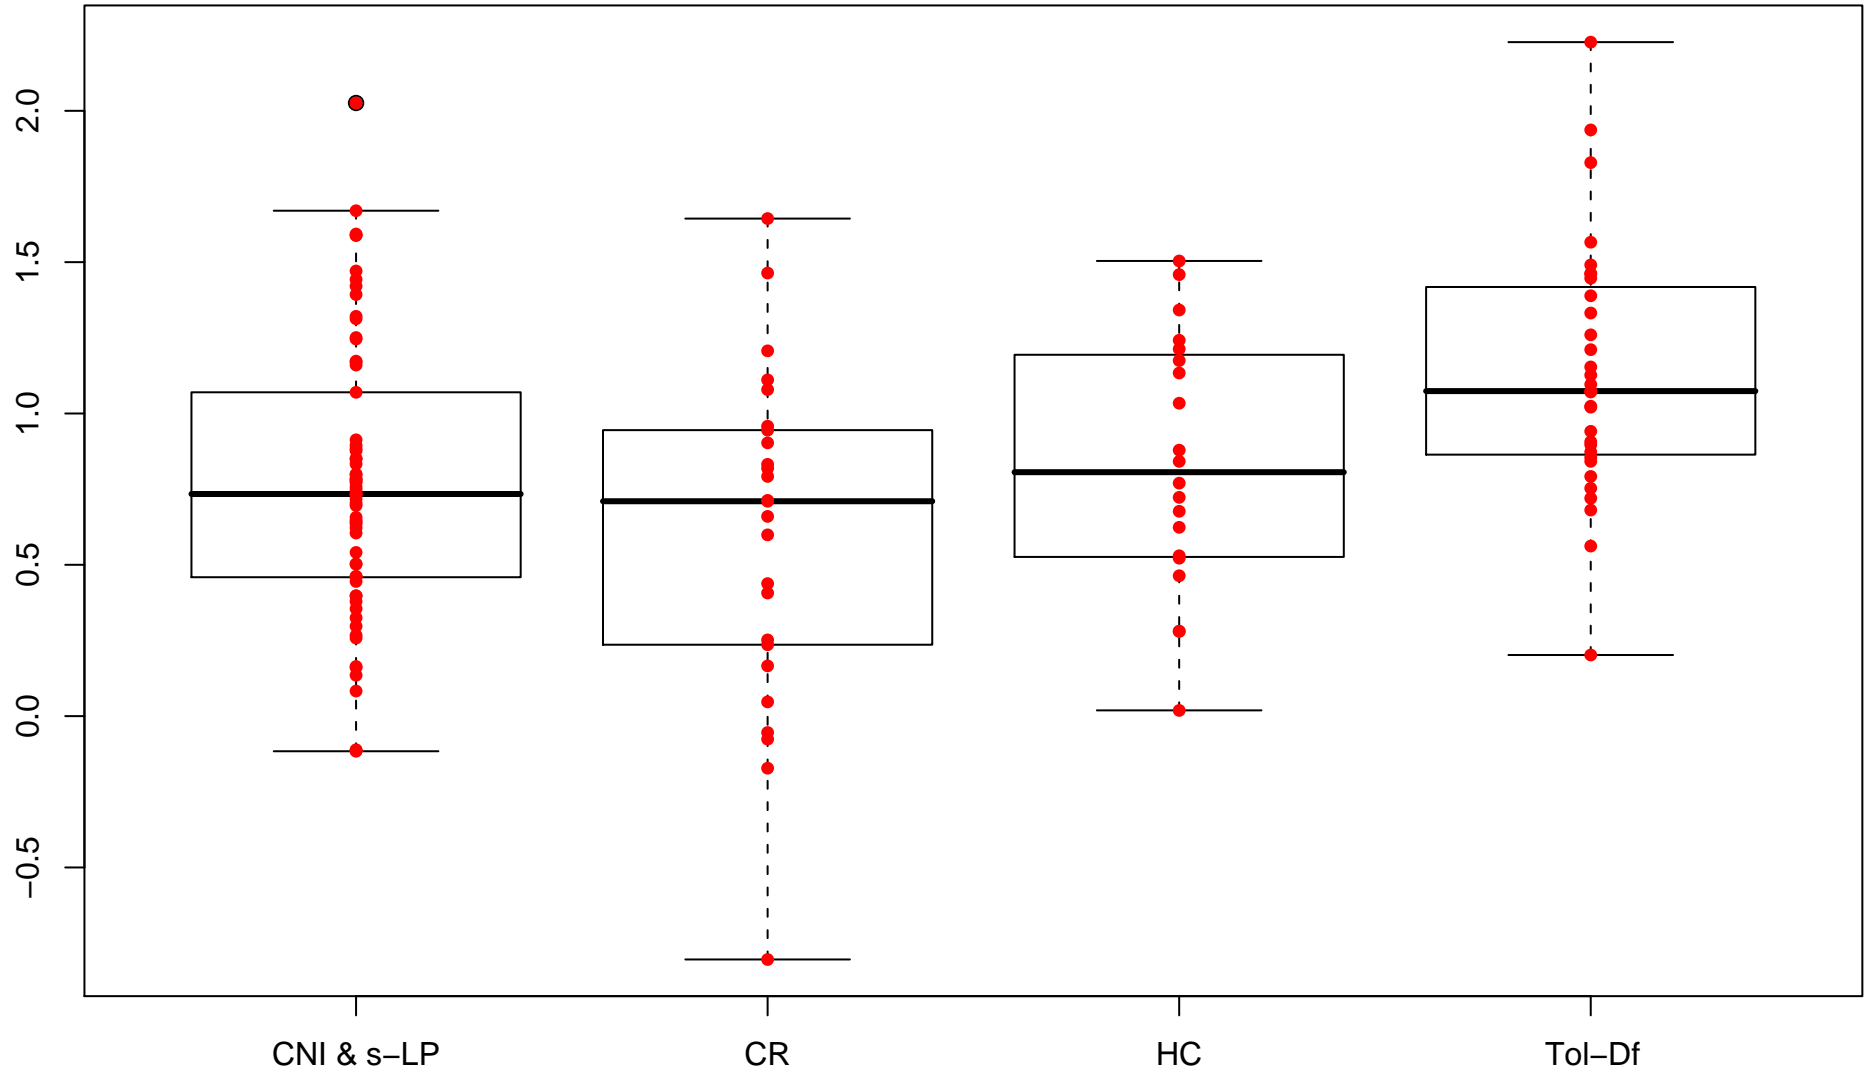



Rank 592 : SSR4  
0.0004425

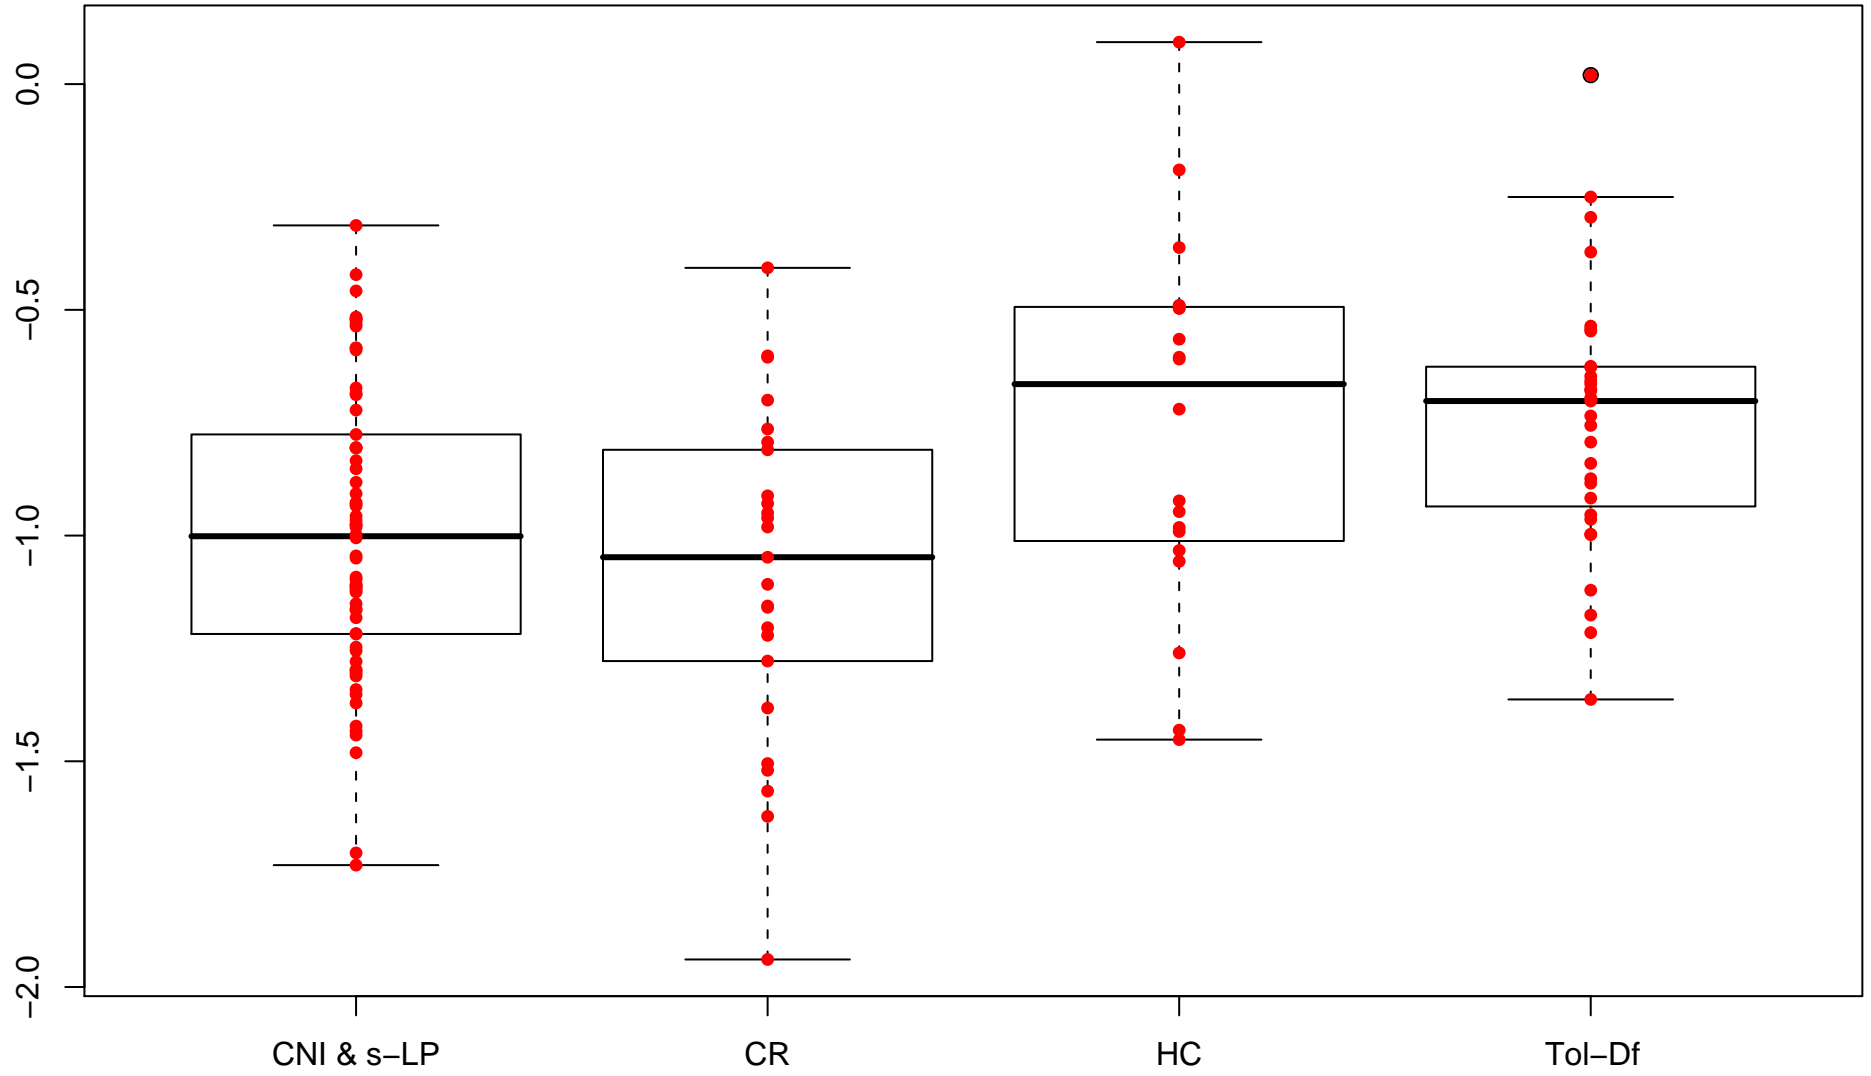

Rank 593 : UCKL1  
0.0004475

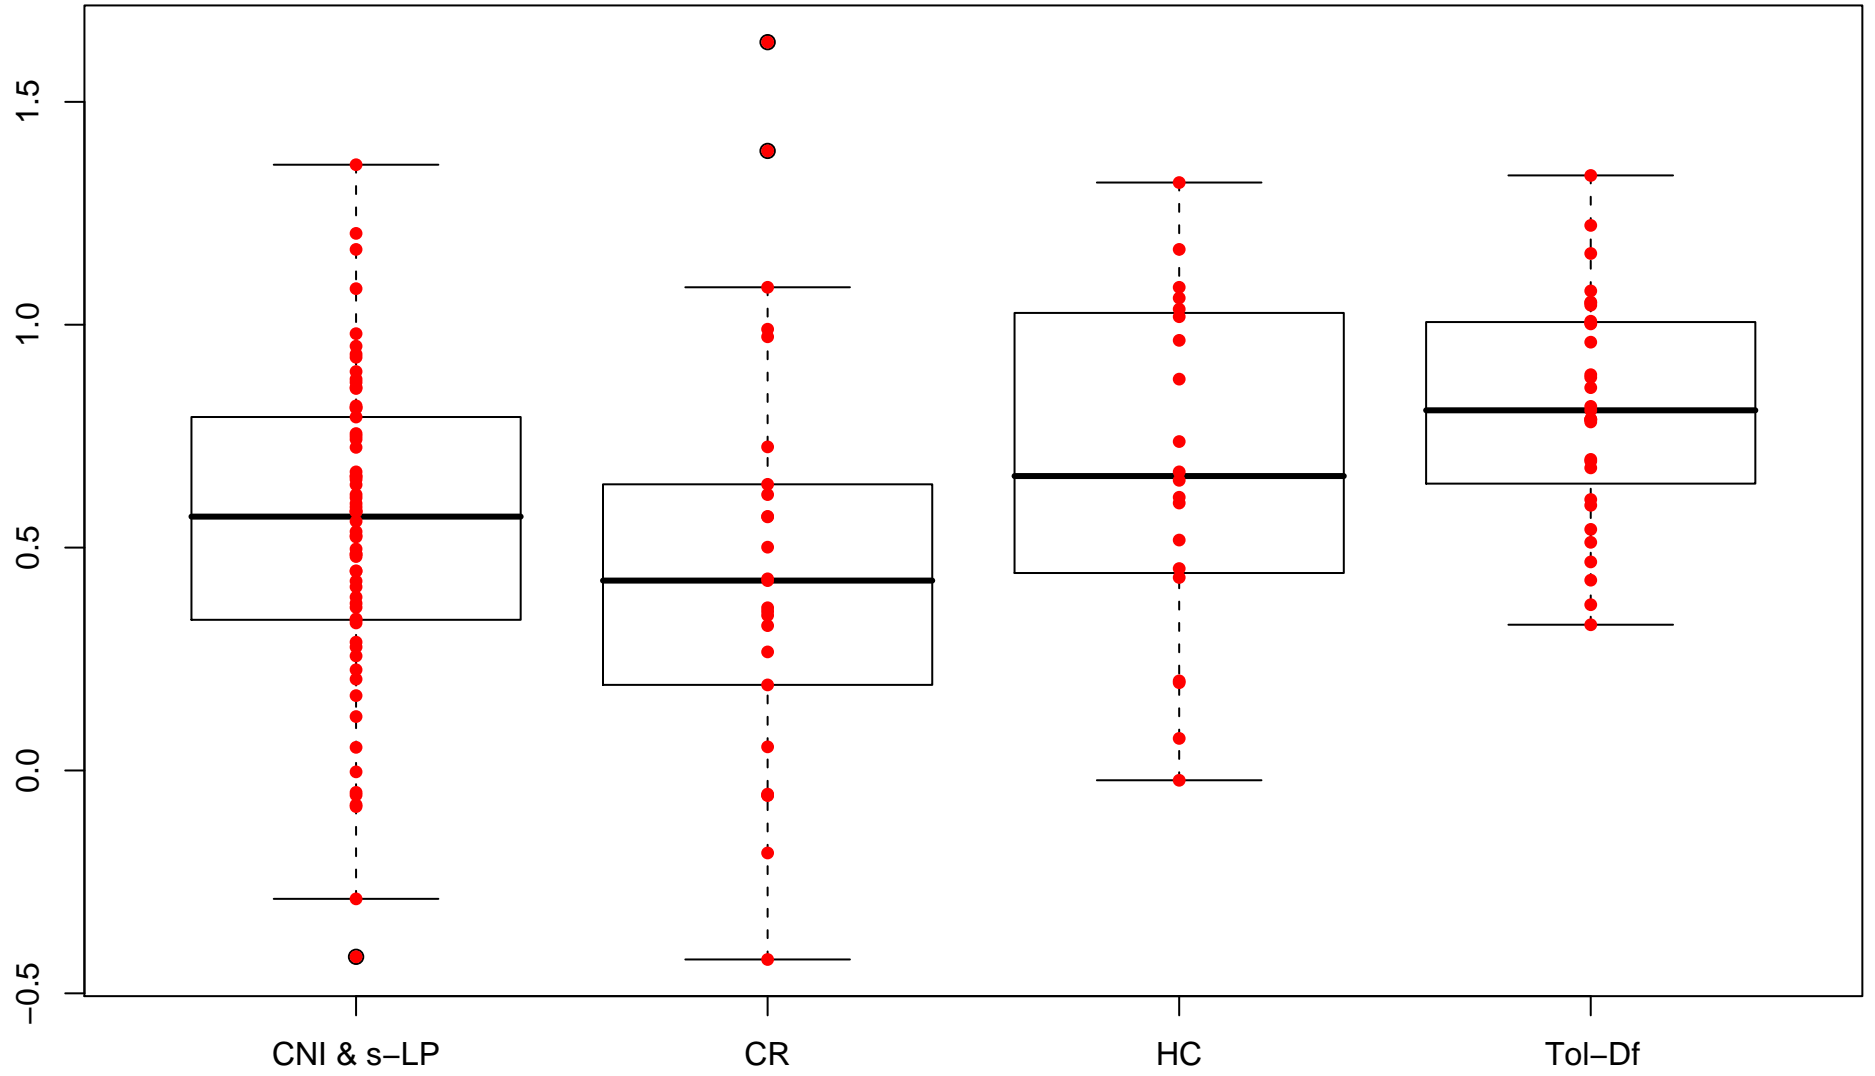

Rank 594 : C14ORF129  
0.0004497

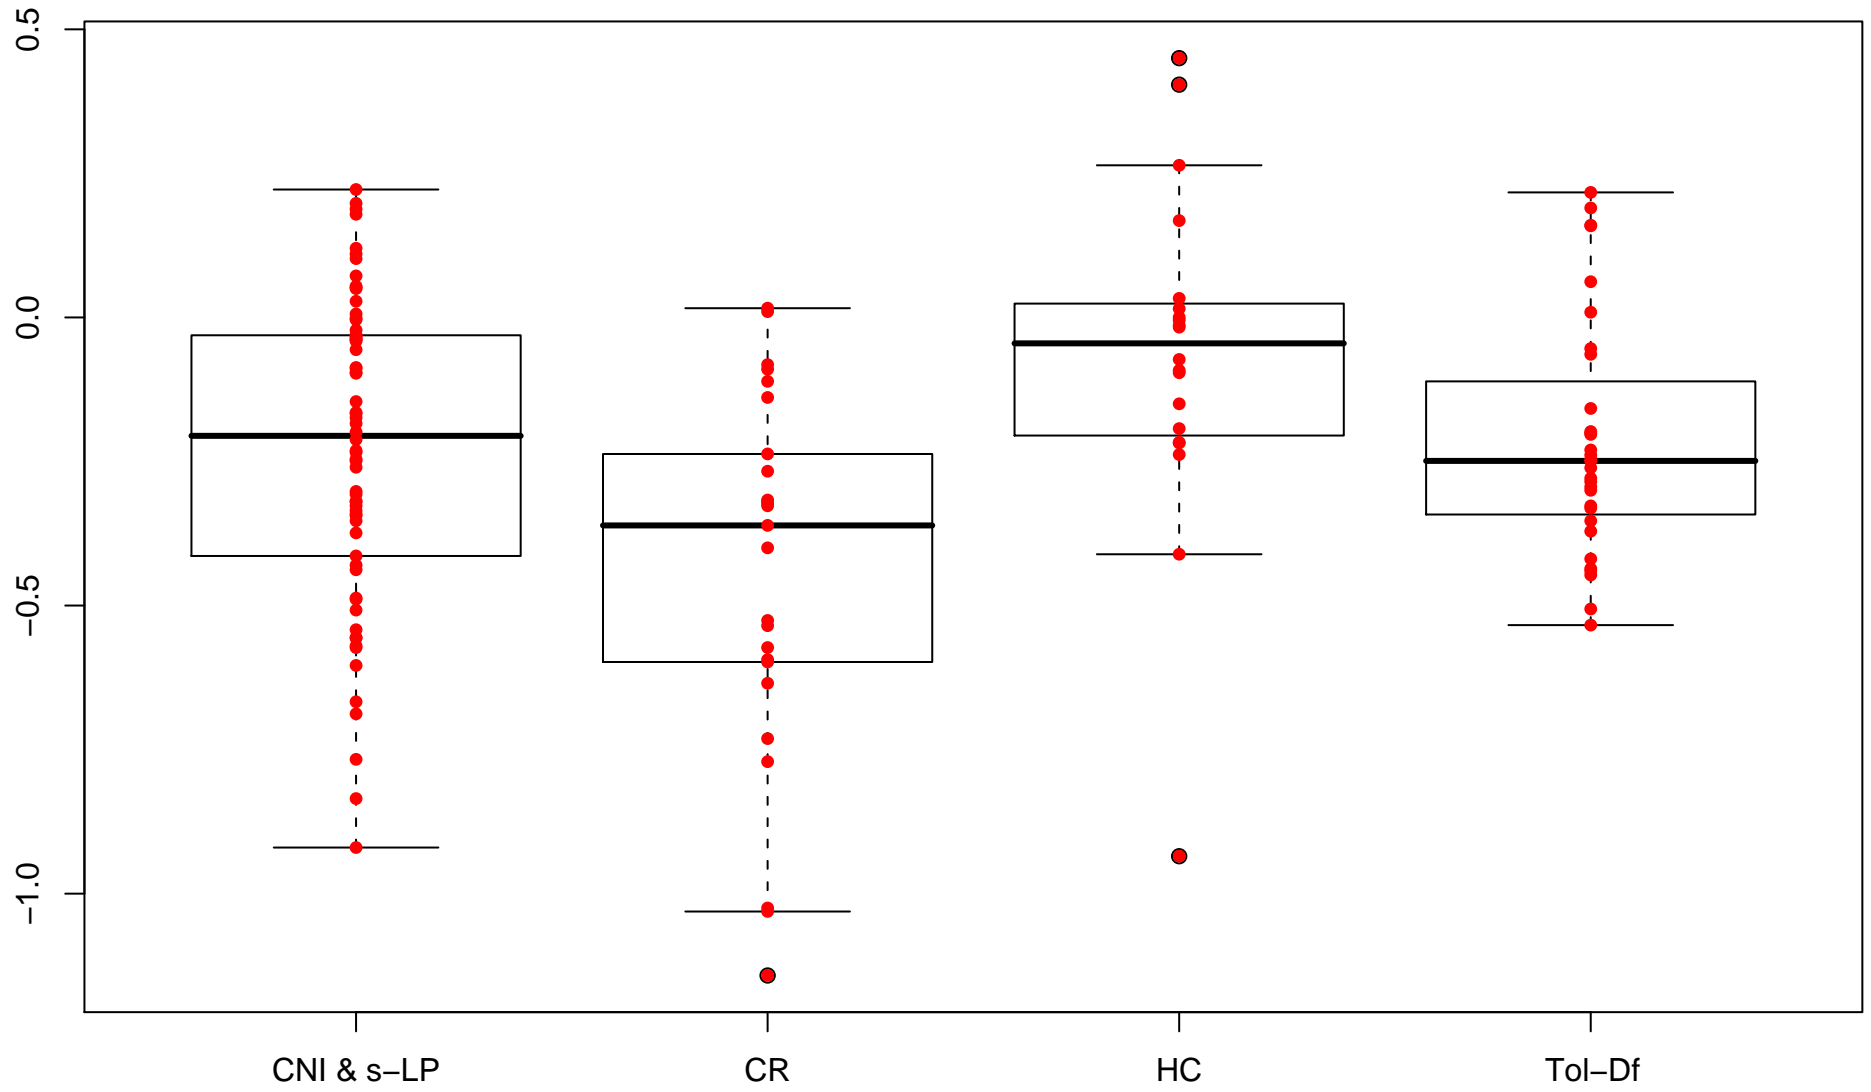

Rank 595 : GLS  
0.0004502

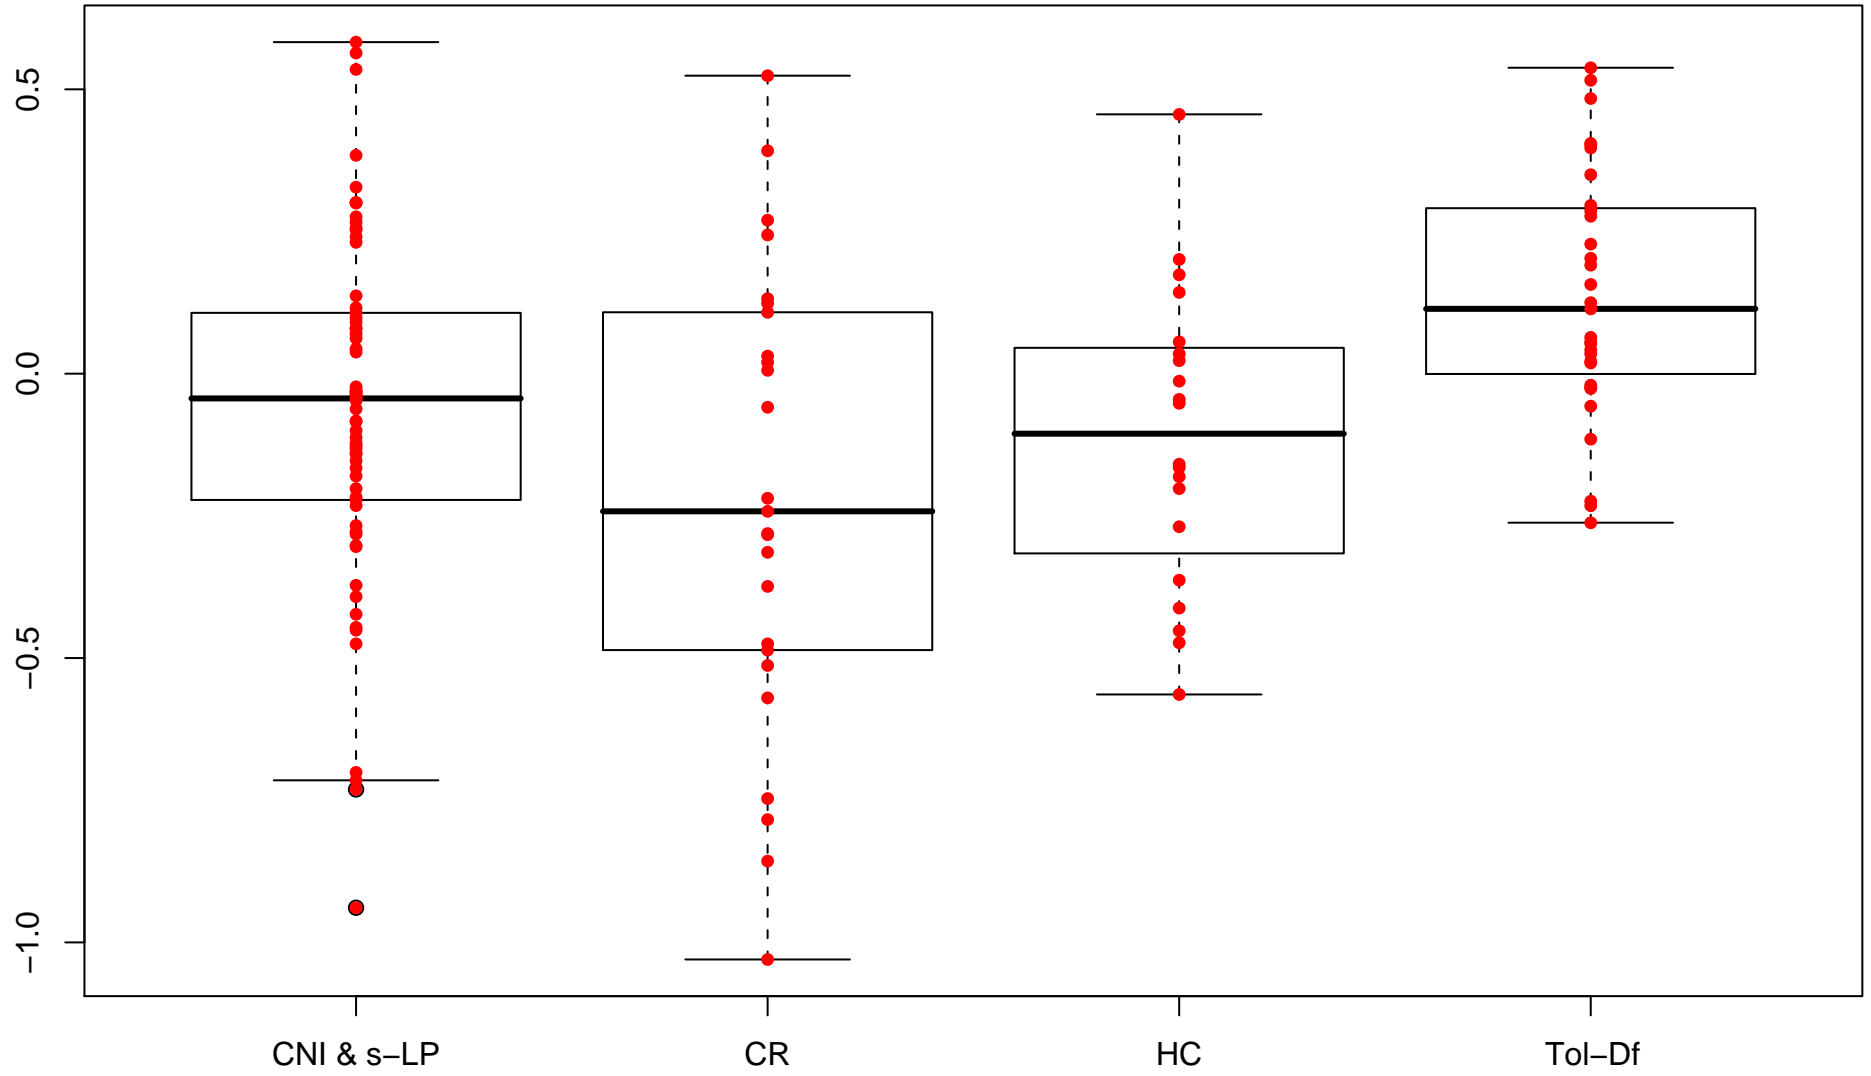

Rank 596 : COX6C  
0.0004543

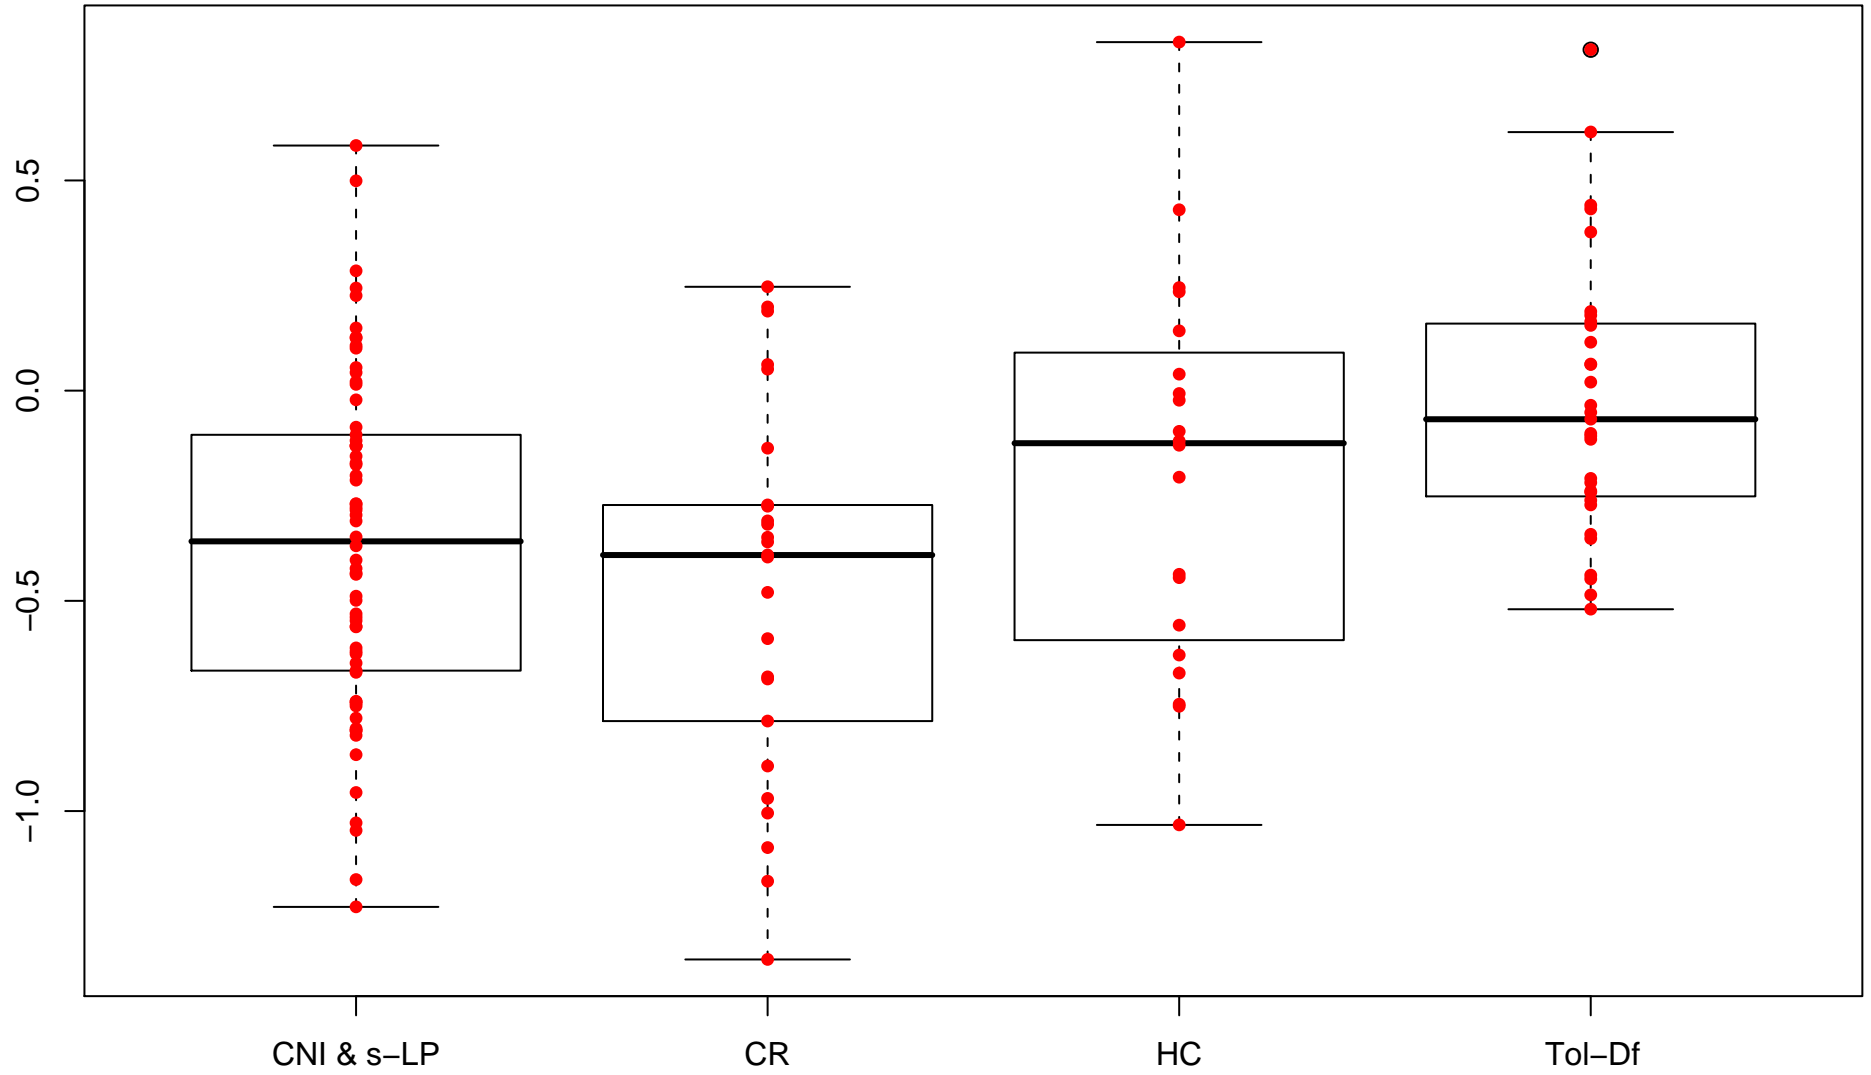

Rank 597 : NGFRAP1  
0.0004645

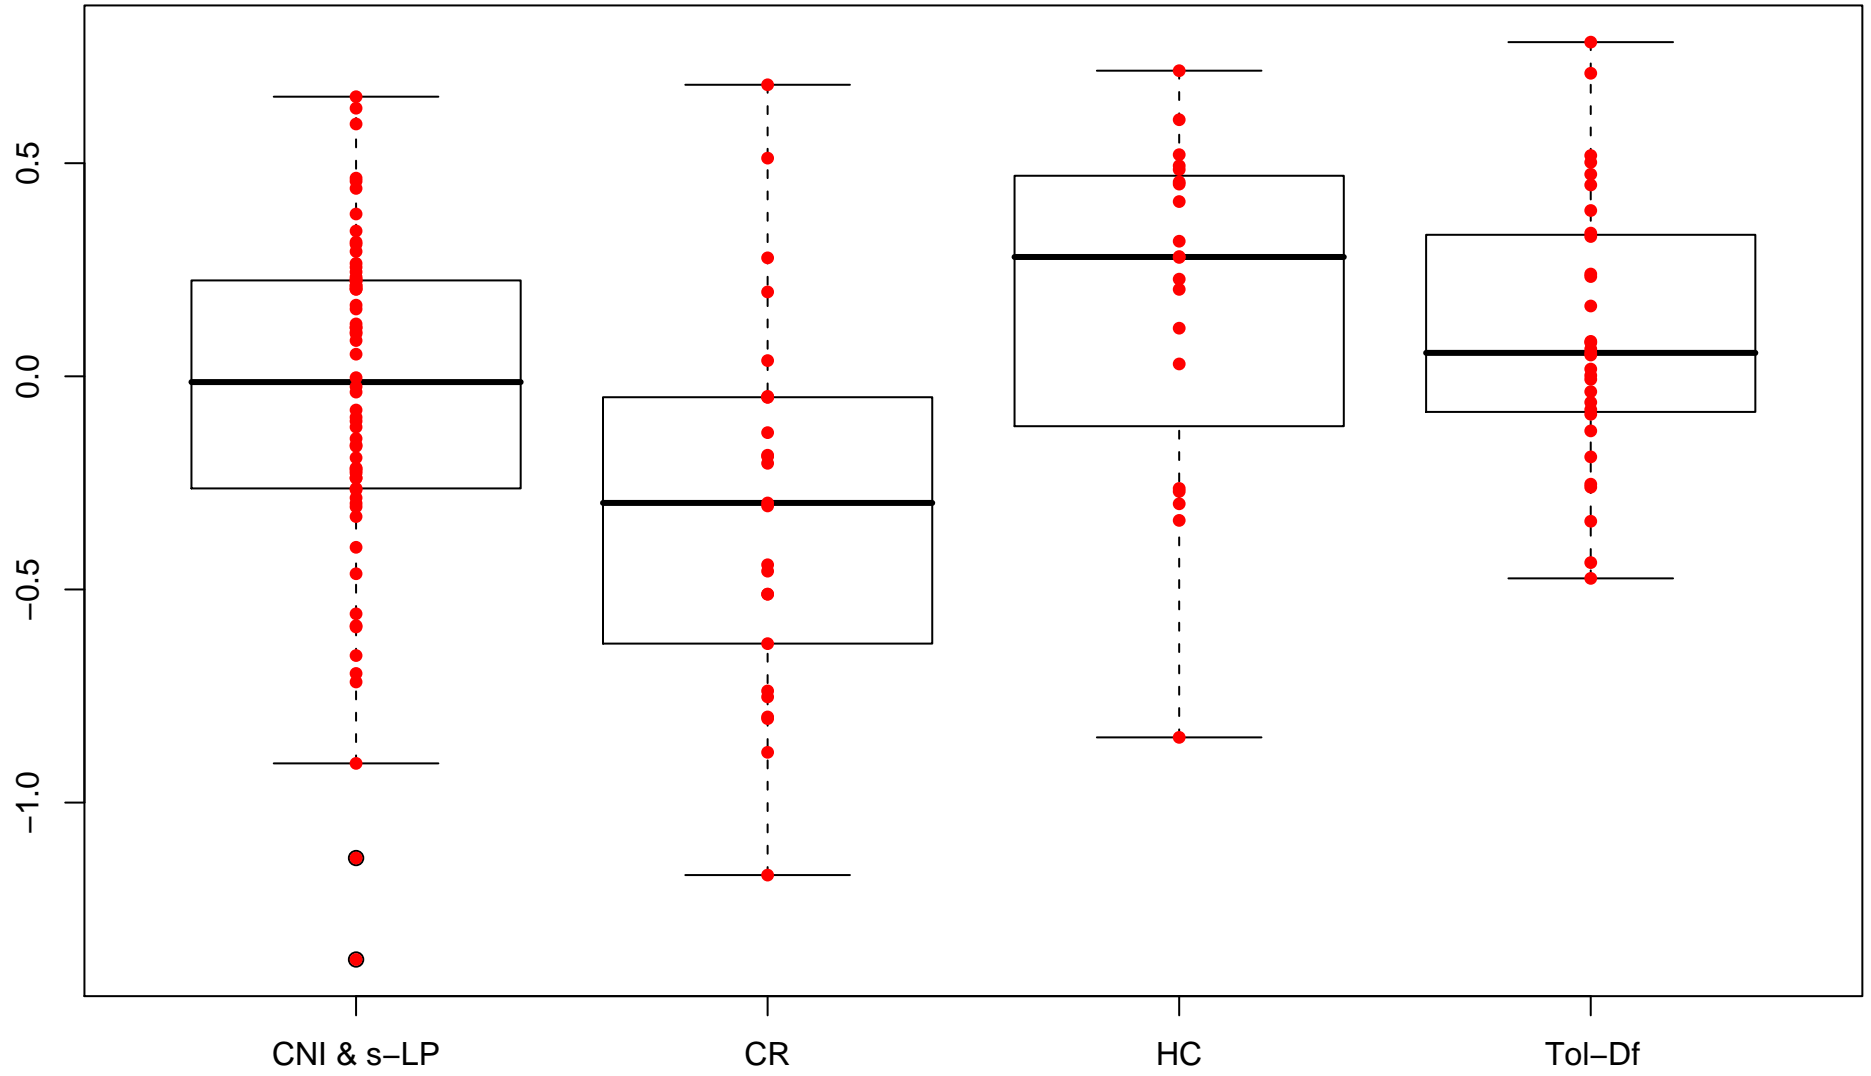

Rank 598 : ITGAX  
0.0004788

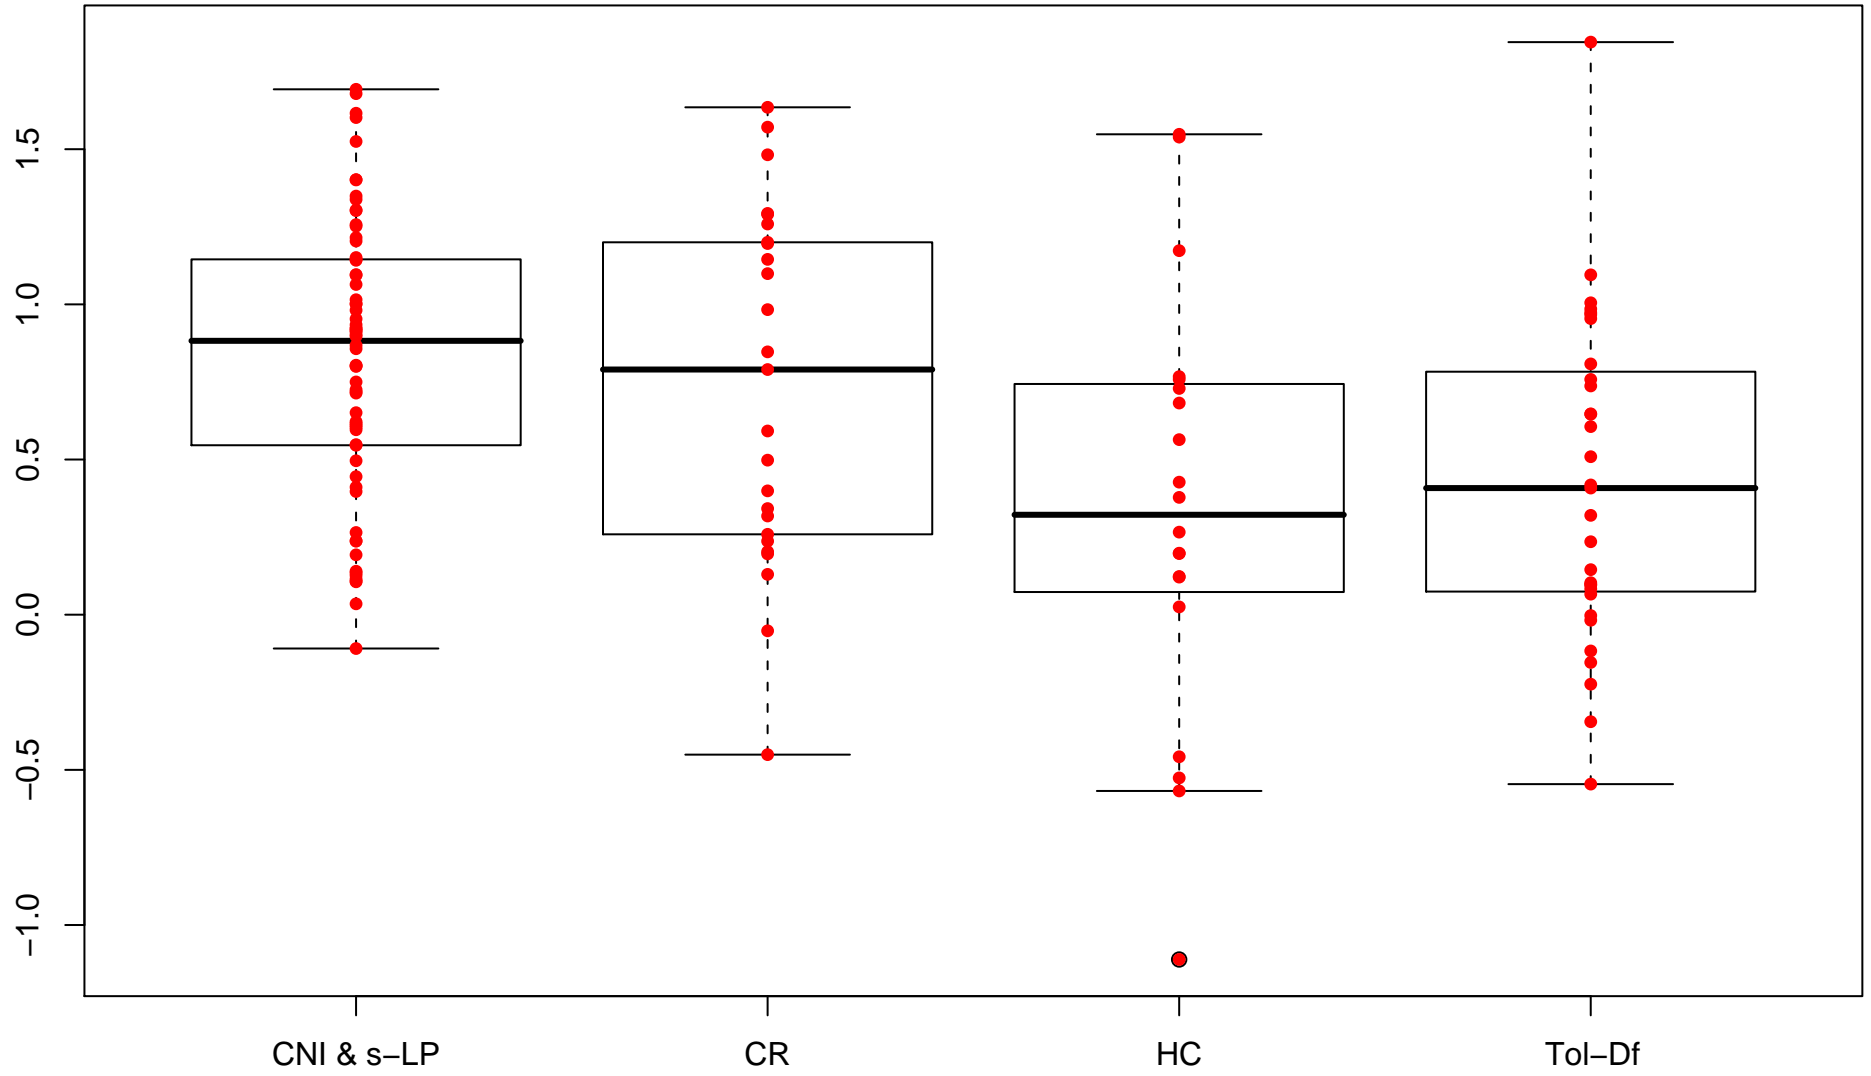

Rank 599 : ALS2CR13  
0.0004793

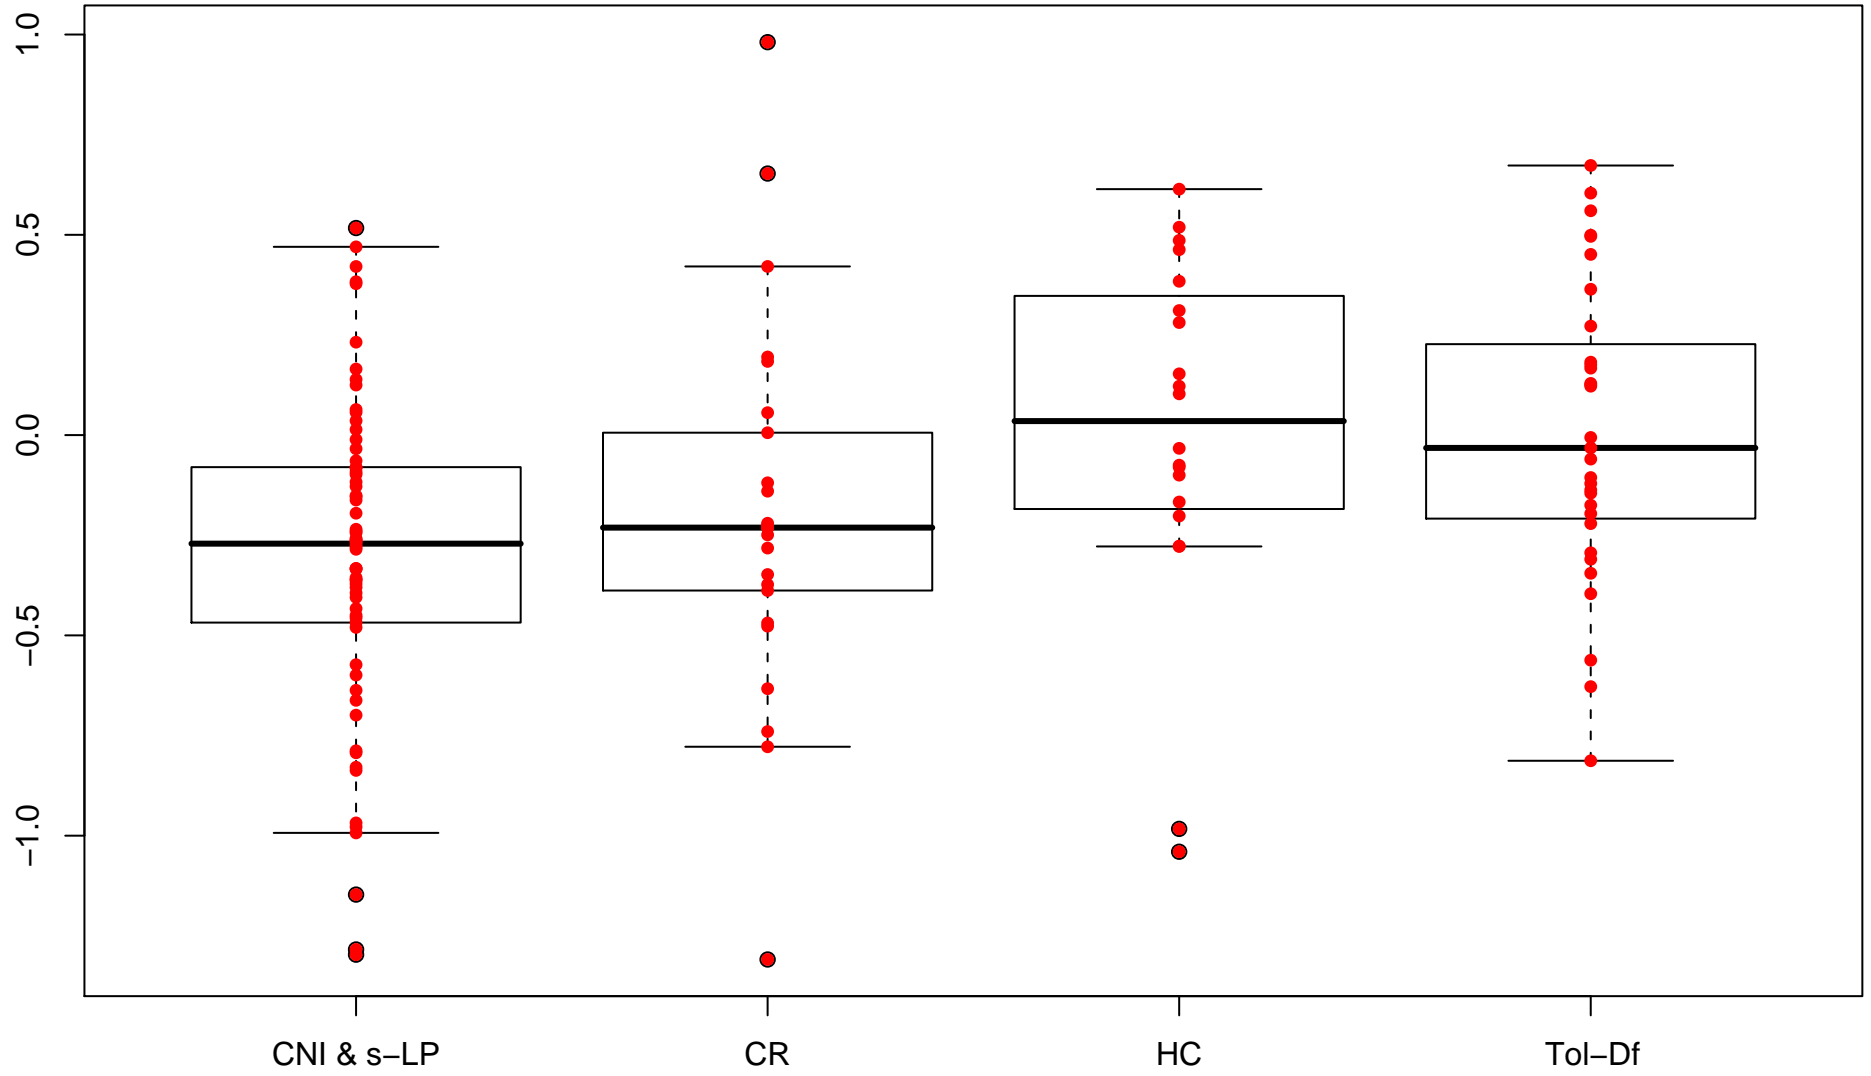



Rank 600 : CA4  
0.0004799

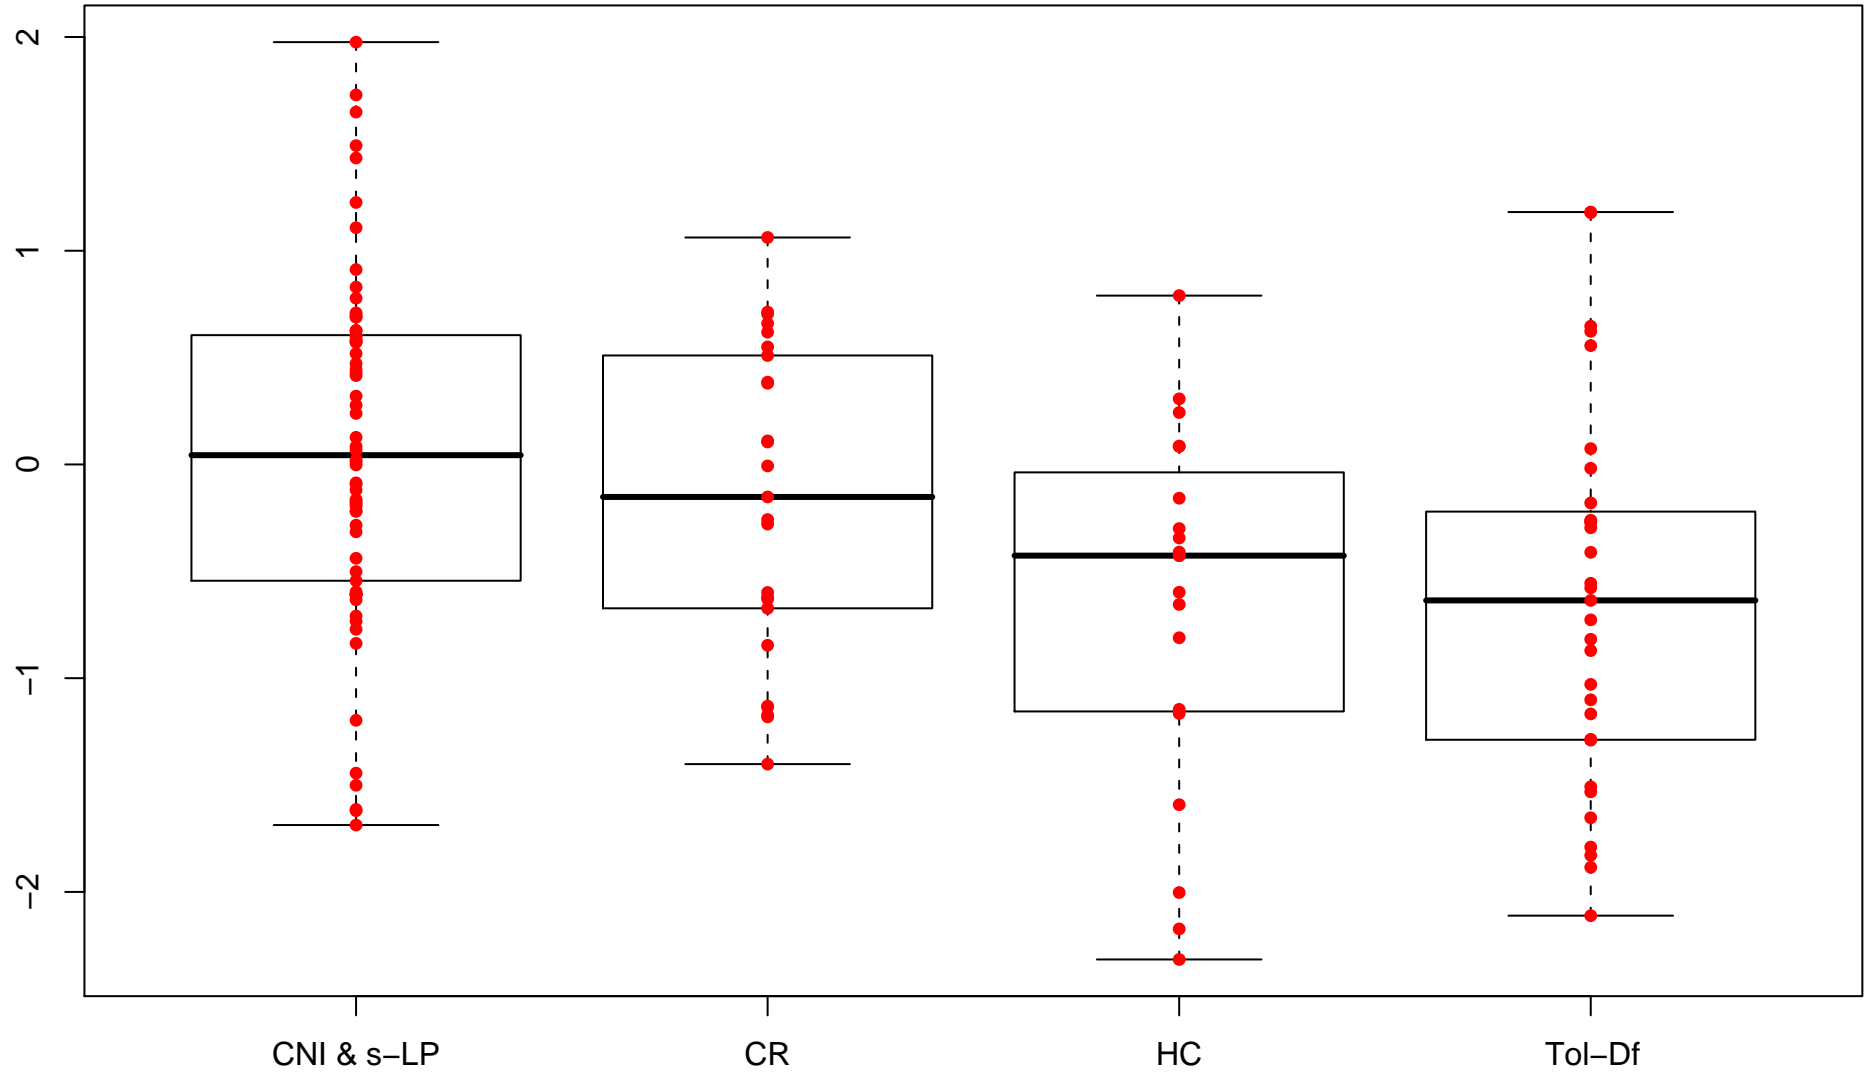

Rank 601 : ABCB1  
0.0004824

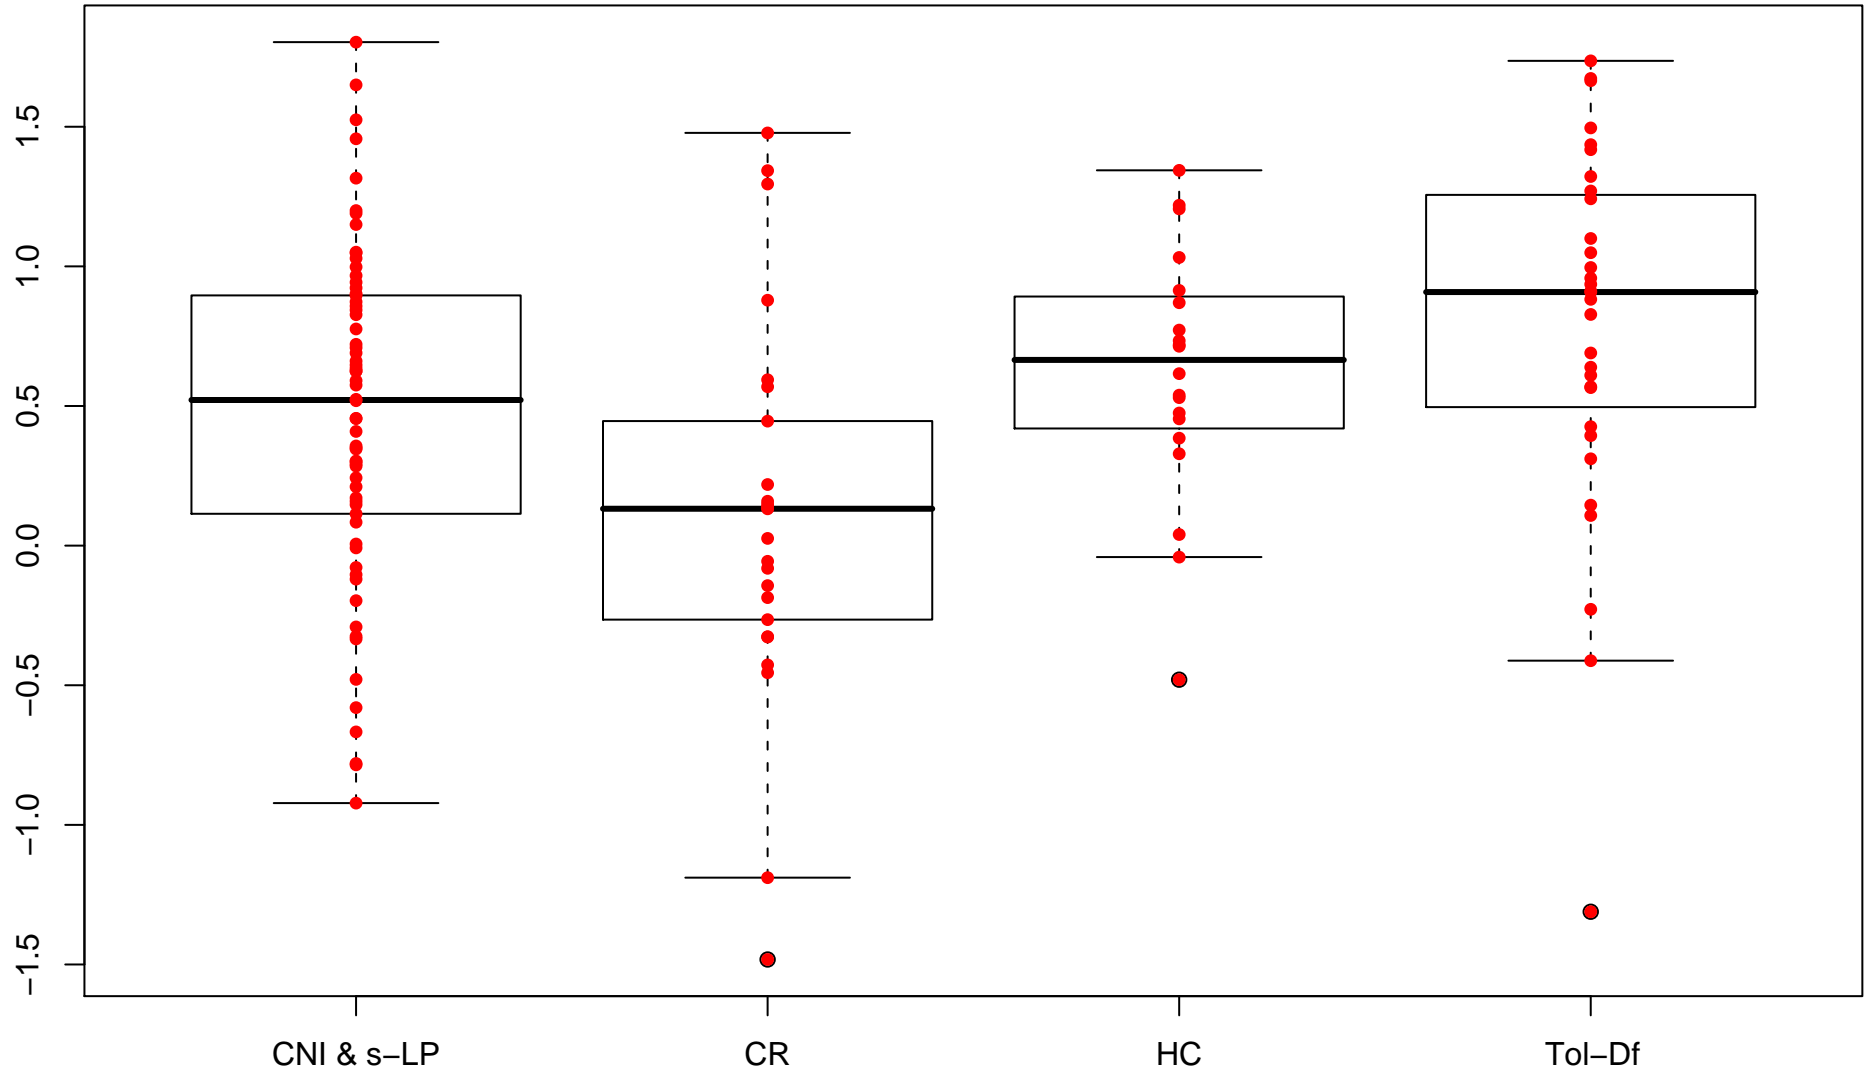

Rank 602 : SOD1  
0.000483

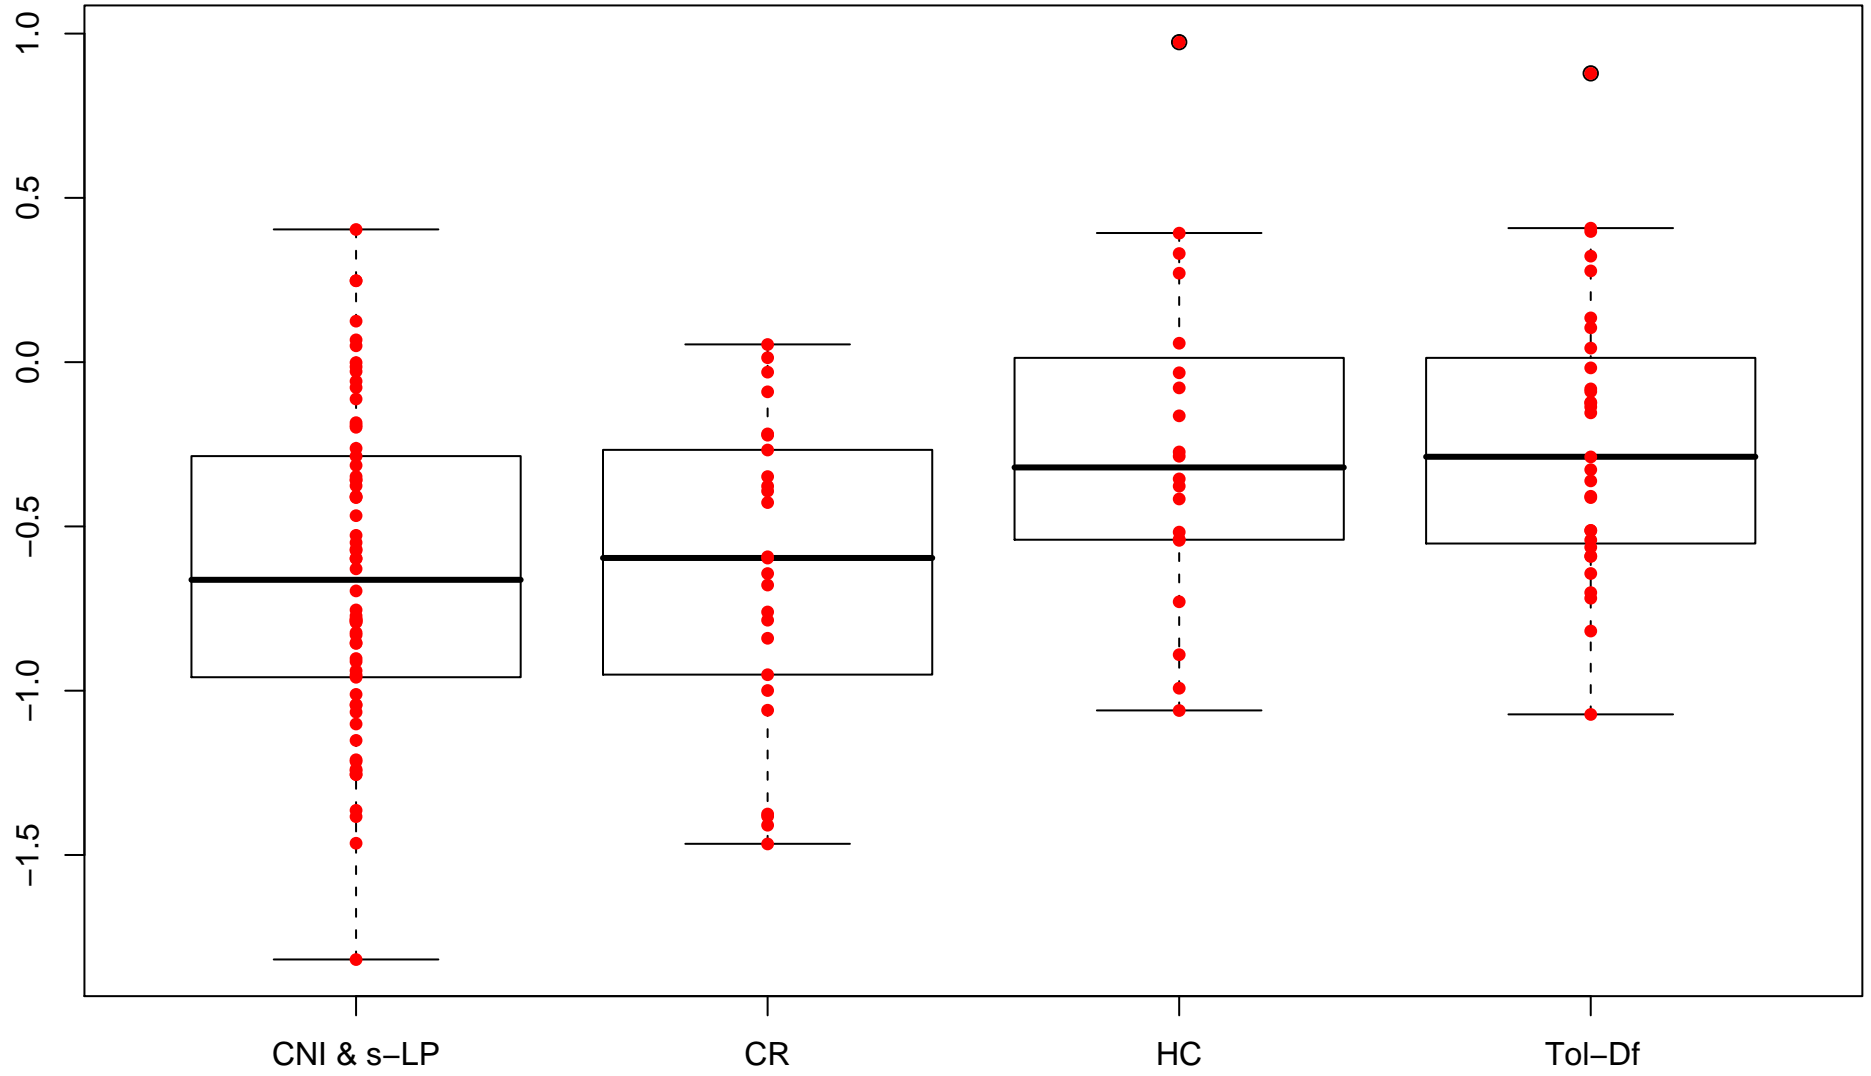

Rank 603 : PIP4K2A  
0.000483

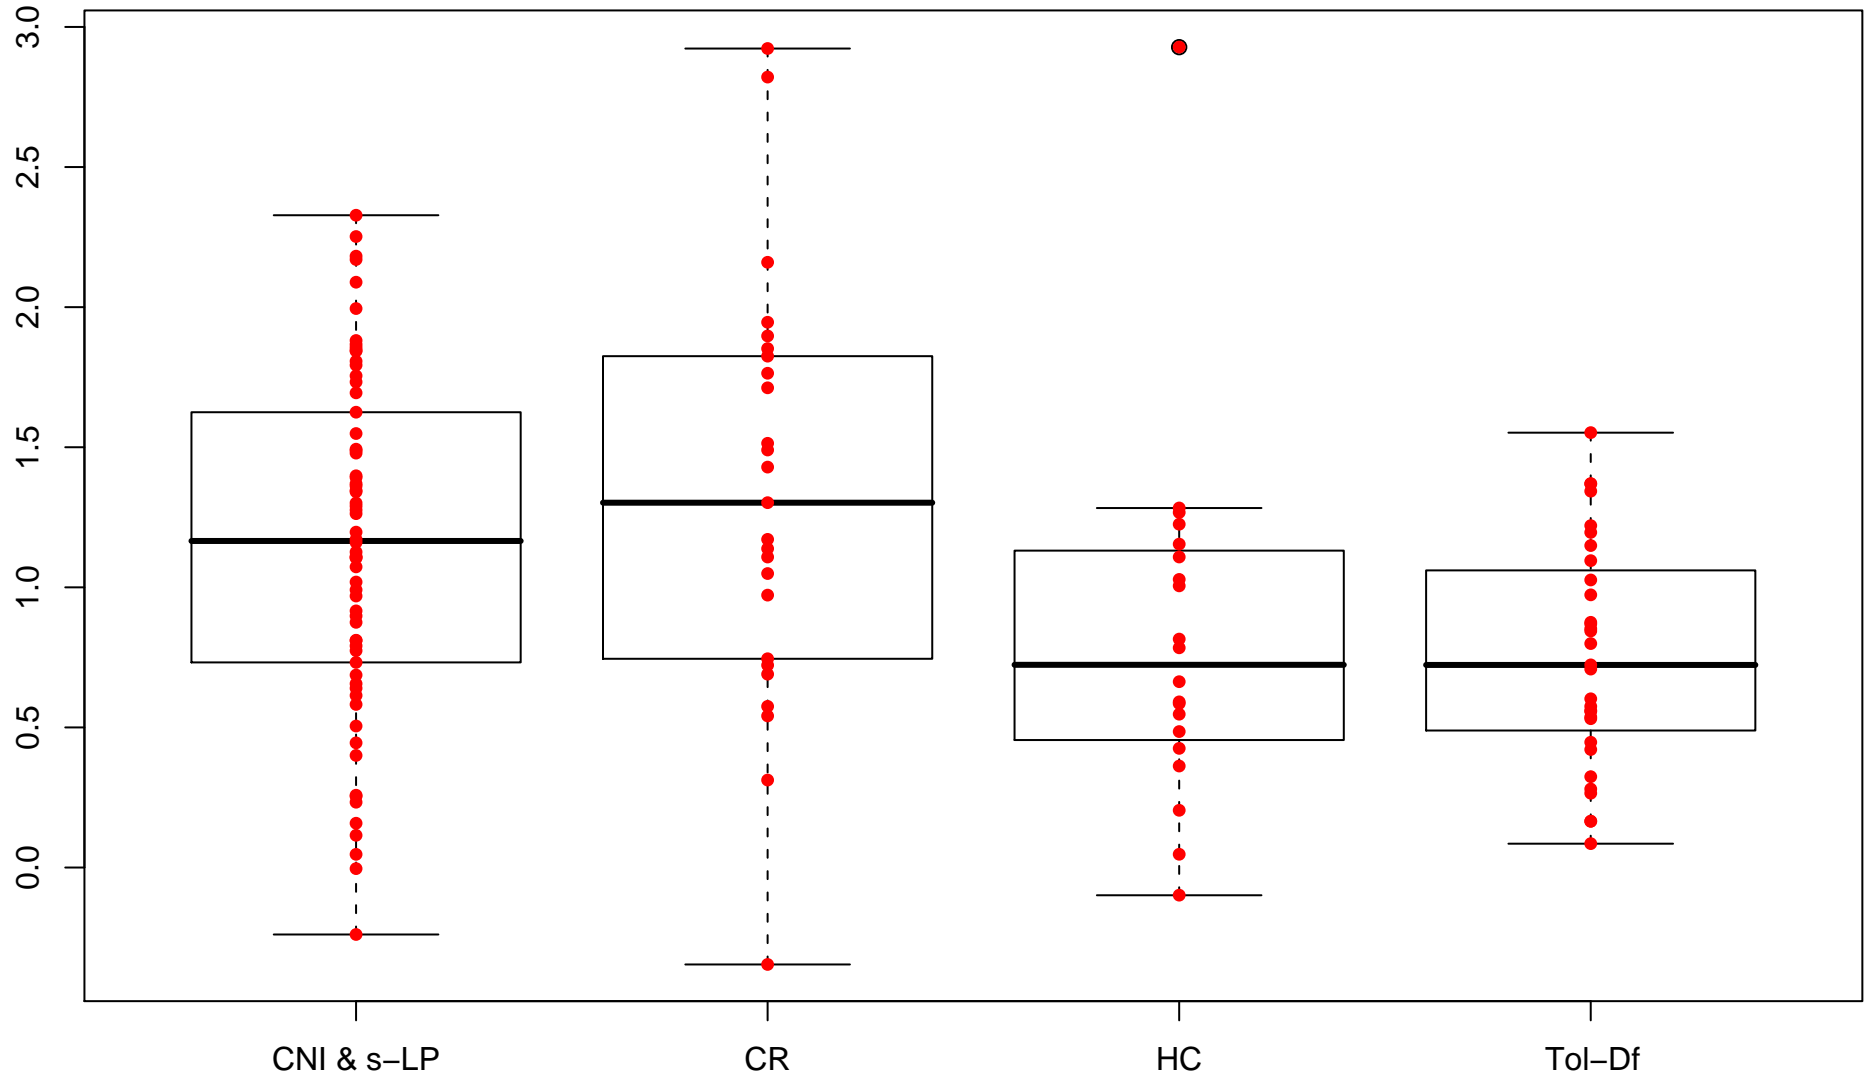

Rank 604 : AF263545  
0.0004853

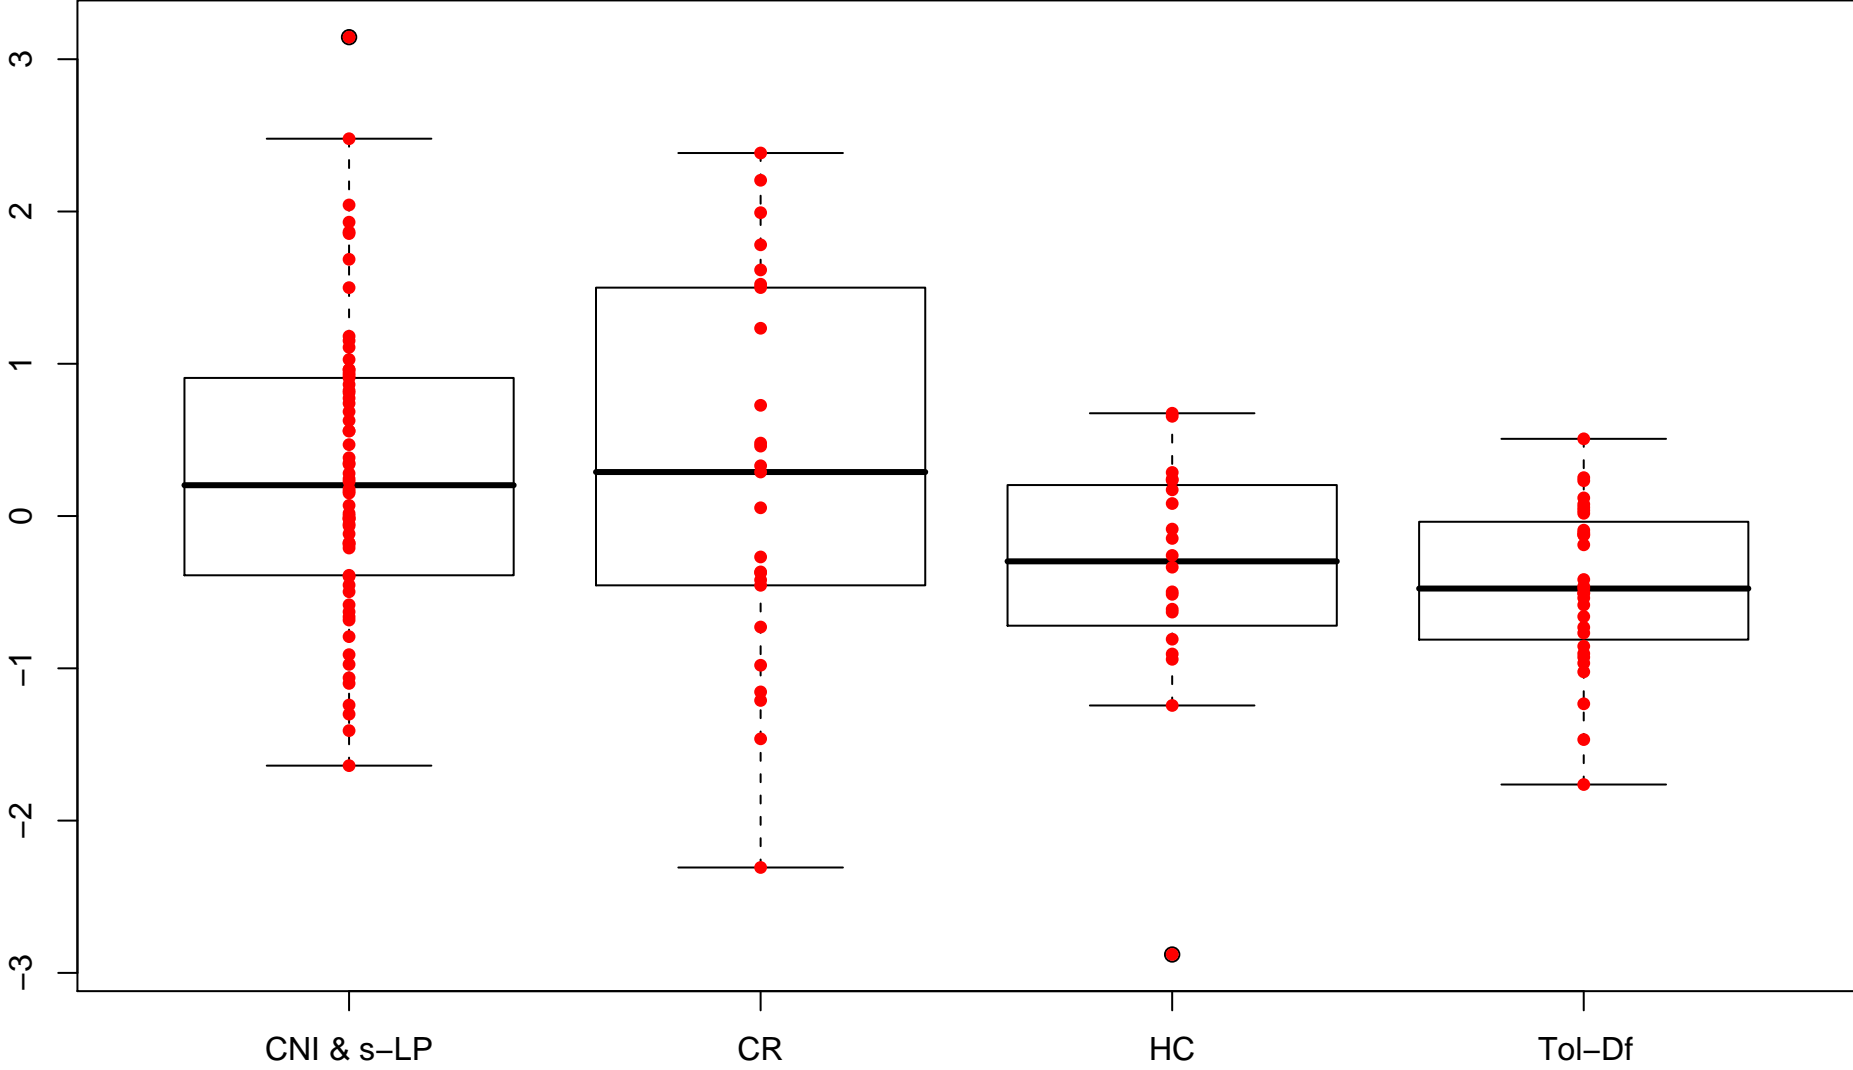

Rank 605 : ZNF804A  
0.0004854

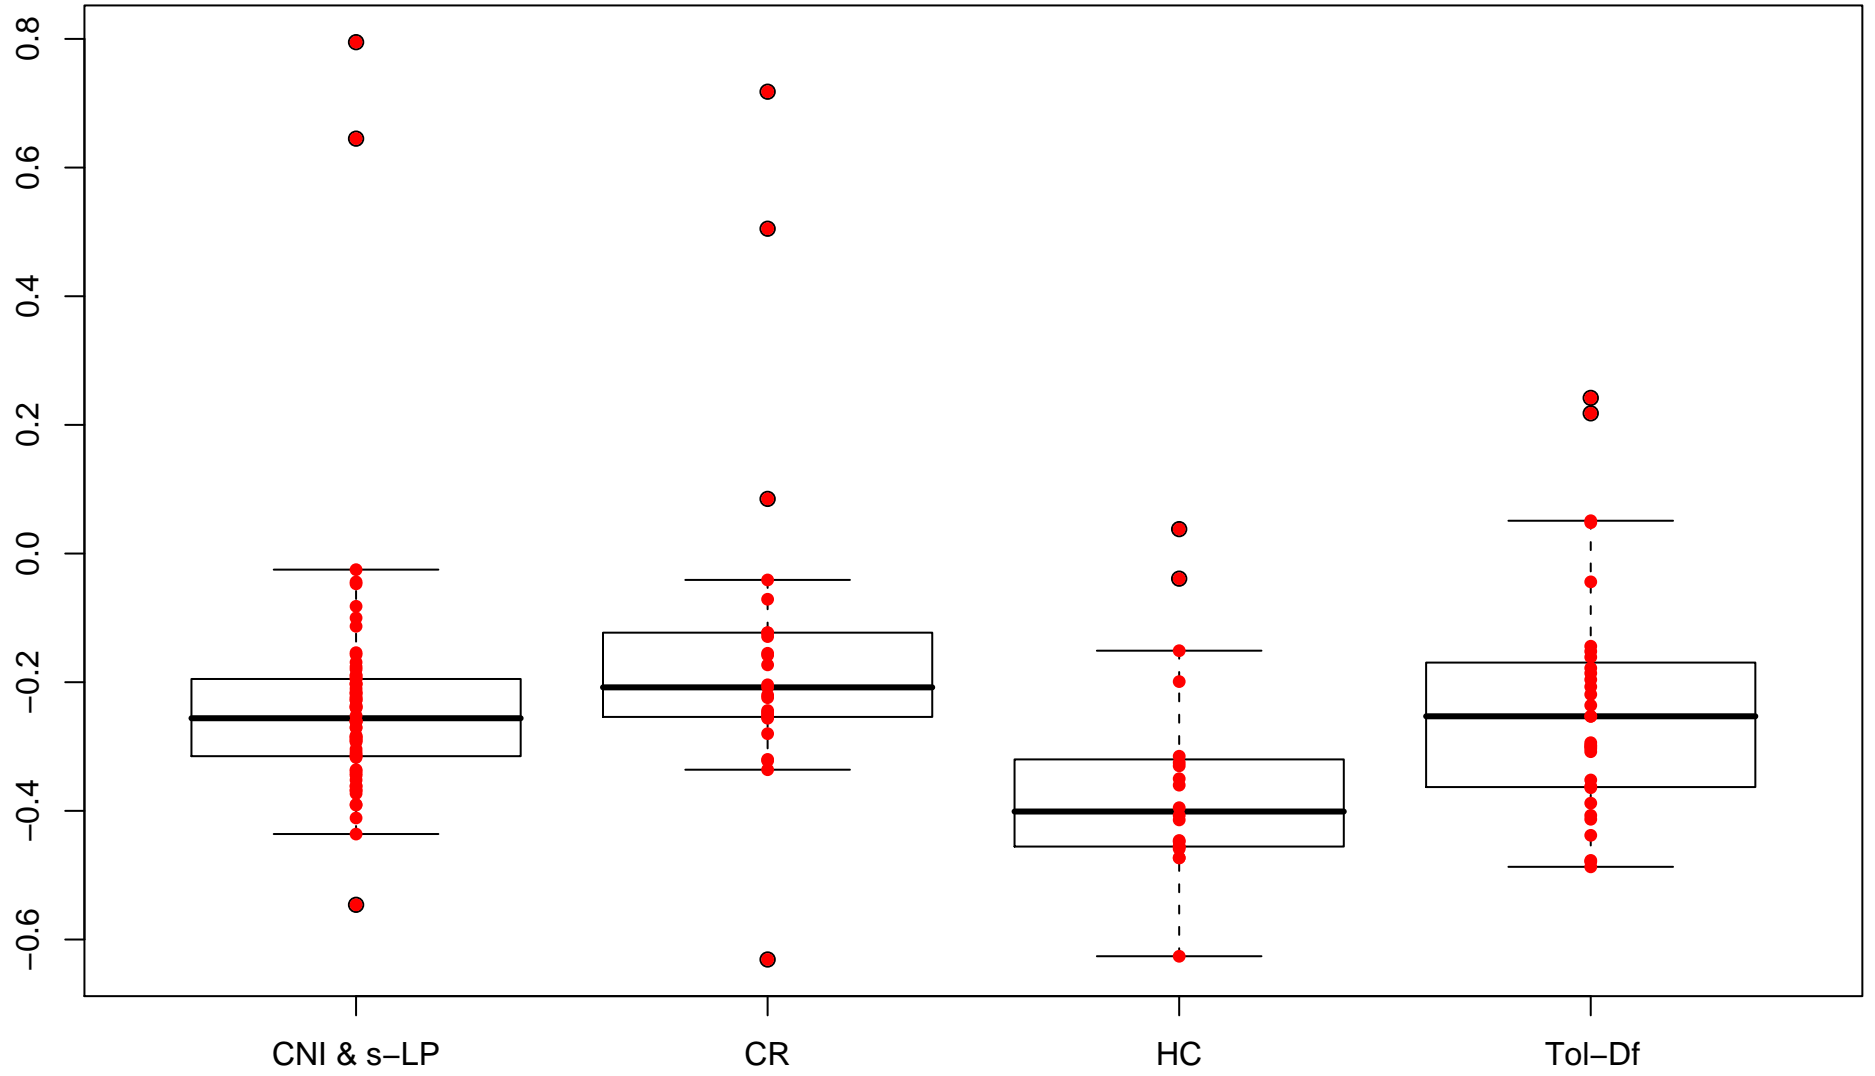

Rank 606 : TACSTD1  
0.0004876

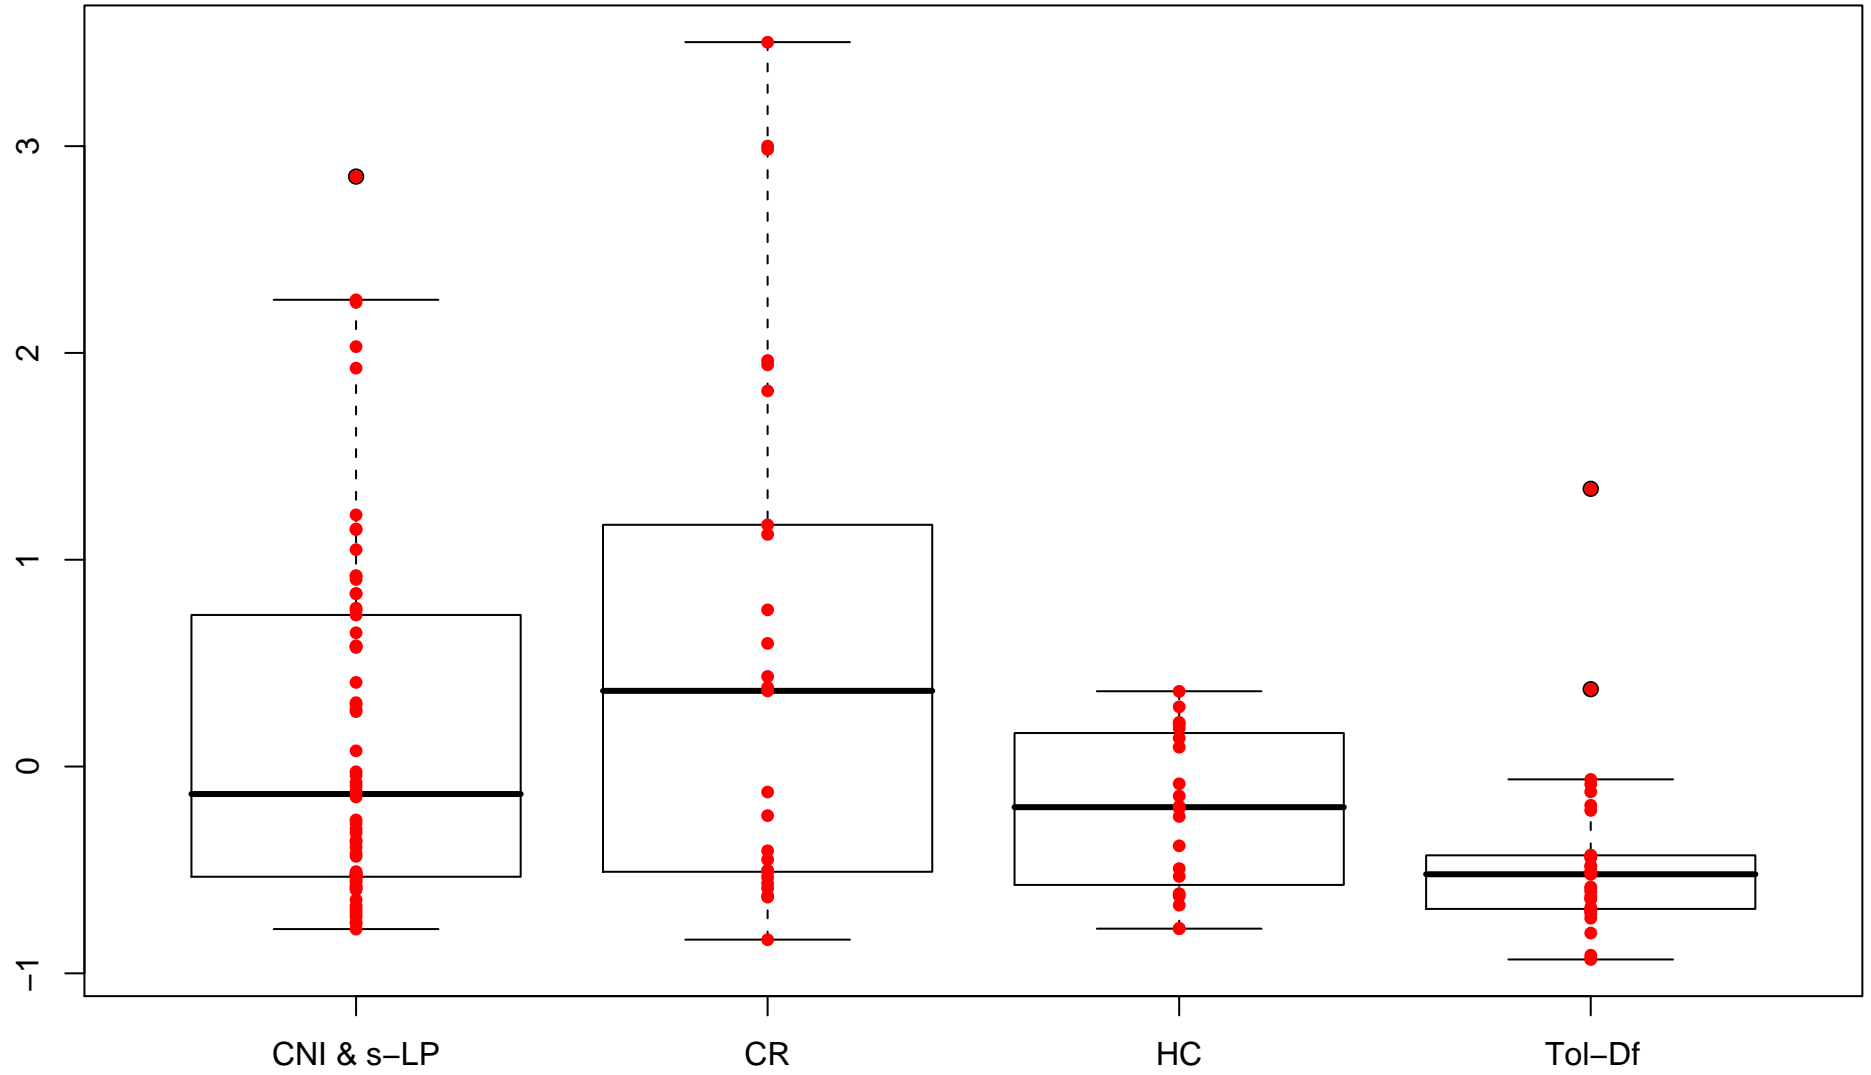

Rank 607 : CLEC5A  
0.0004887

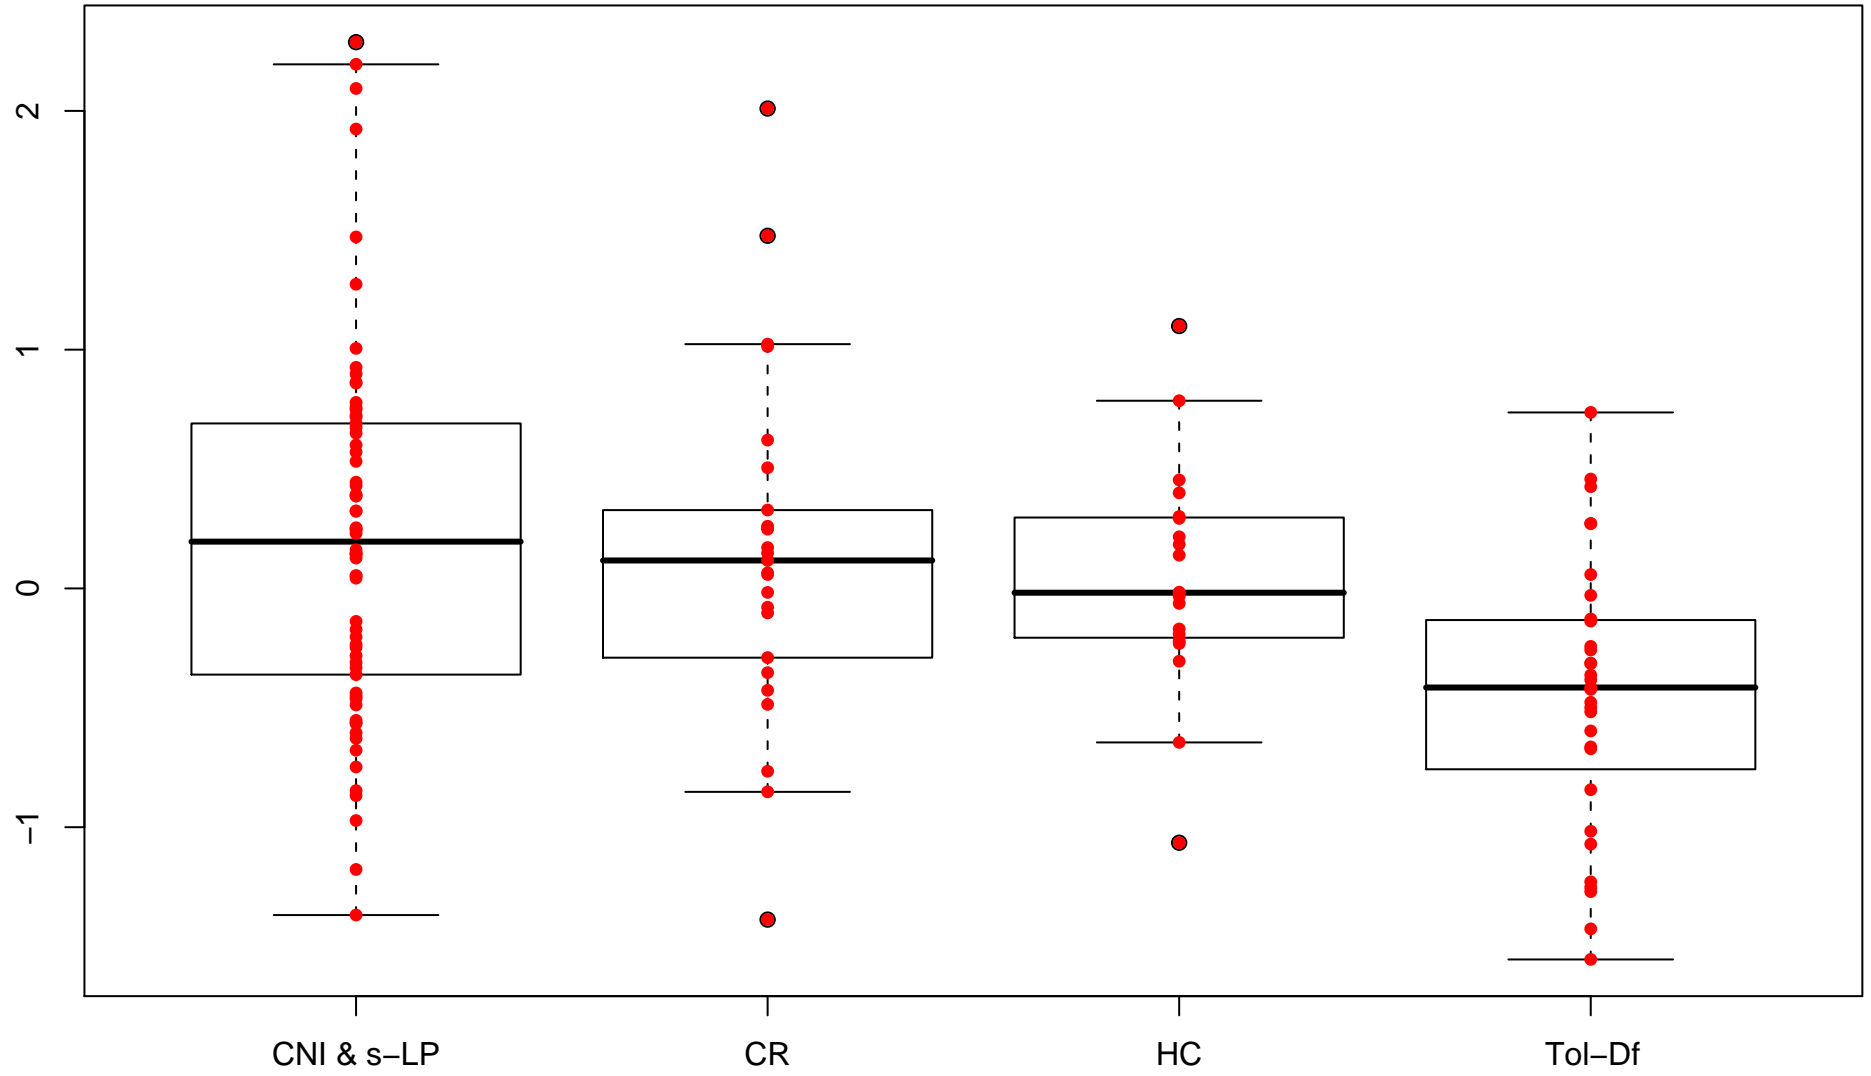



Rank 608 : ID3  
0.0004904

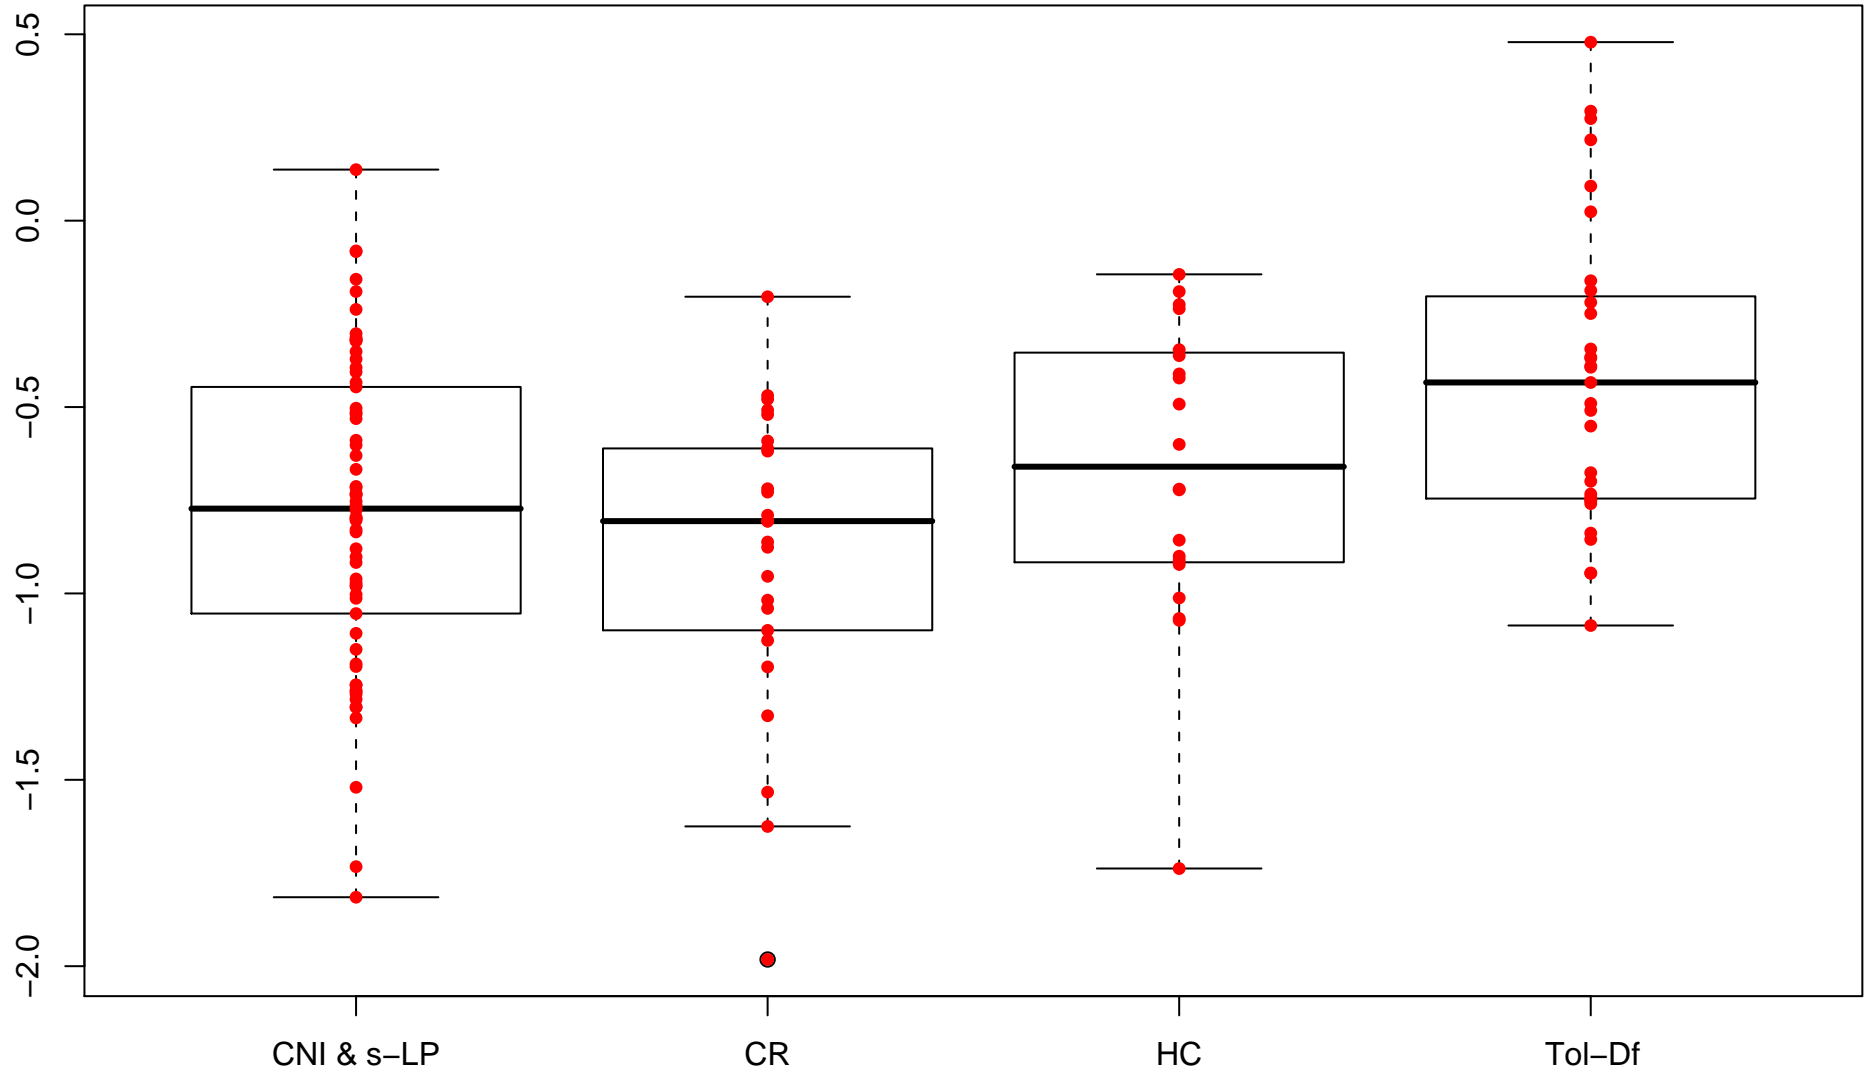

Rank 609 : A\_23\_P147970

0.0004914

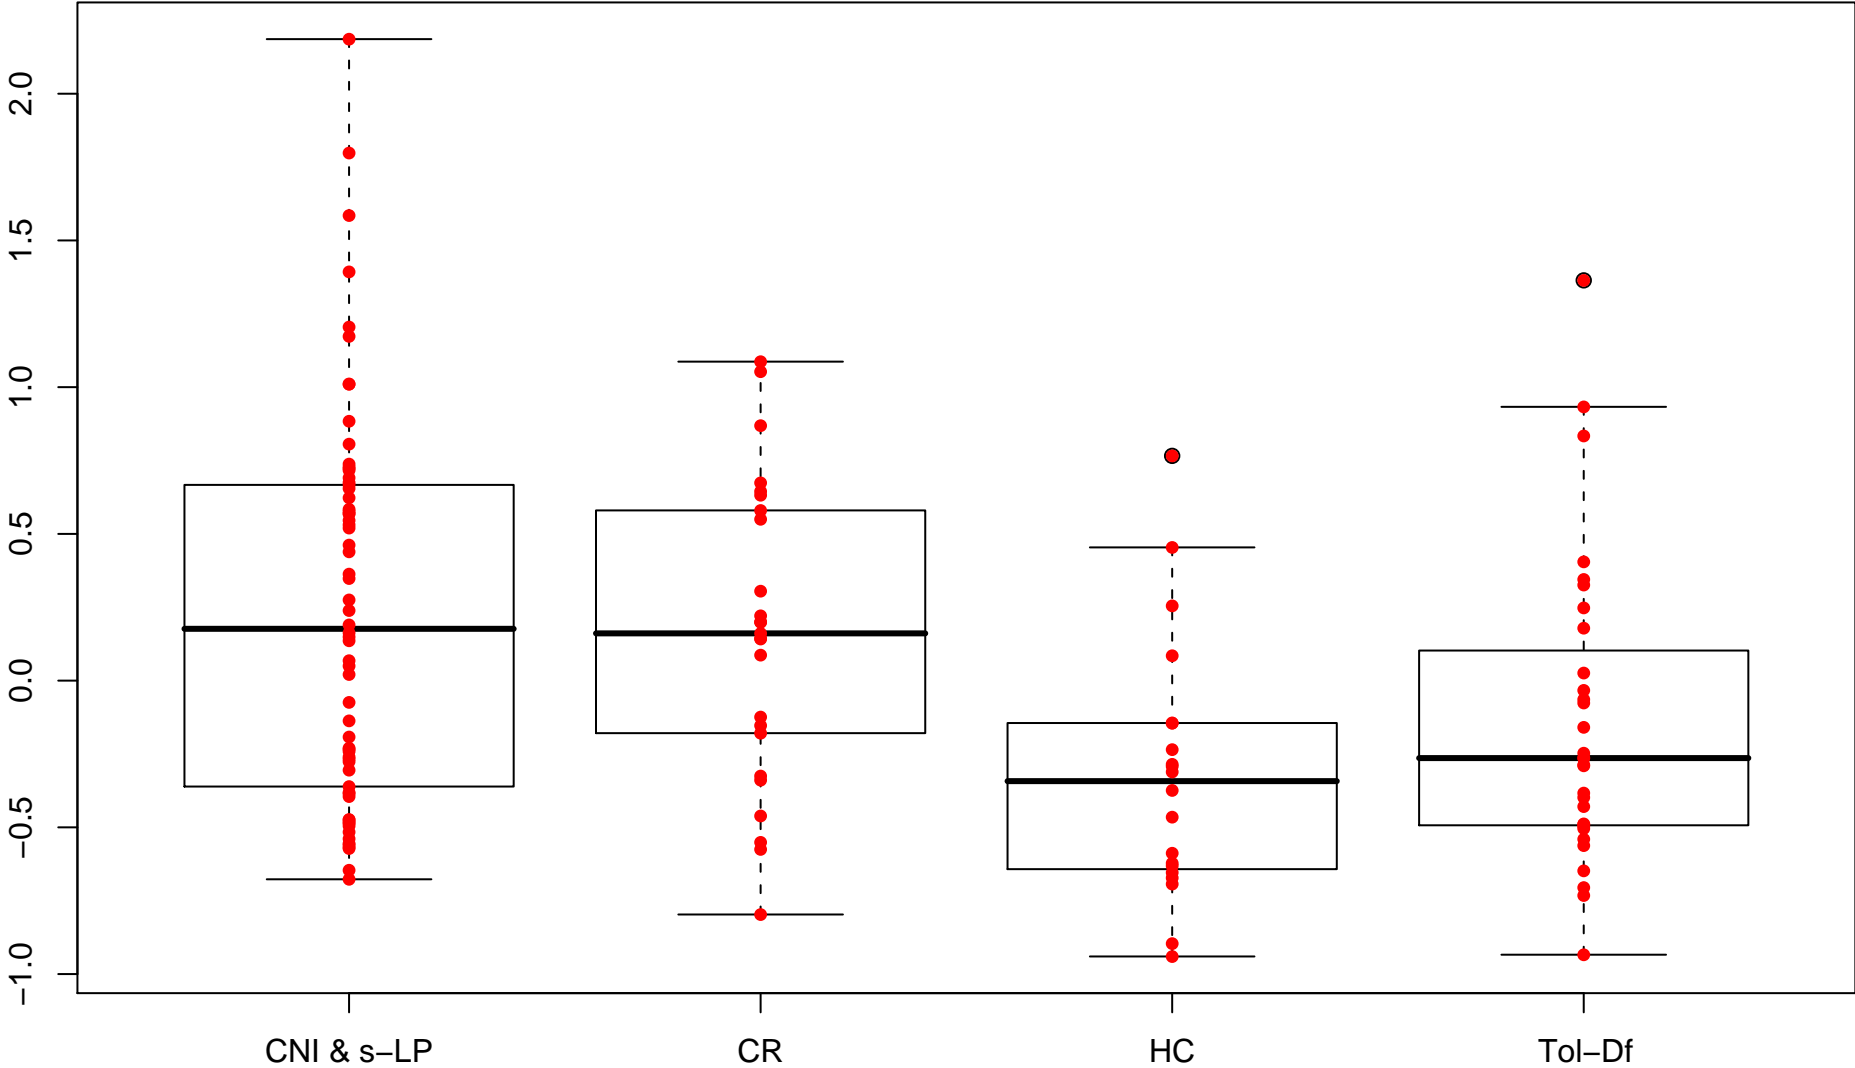

Rank 610 : MT2A  
0.0004955

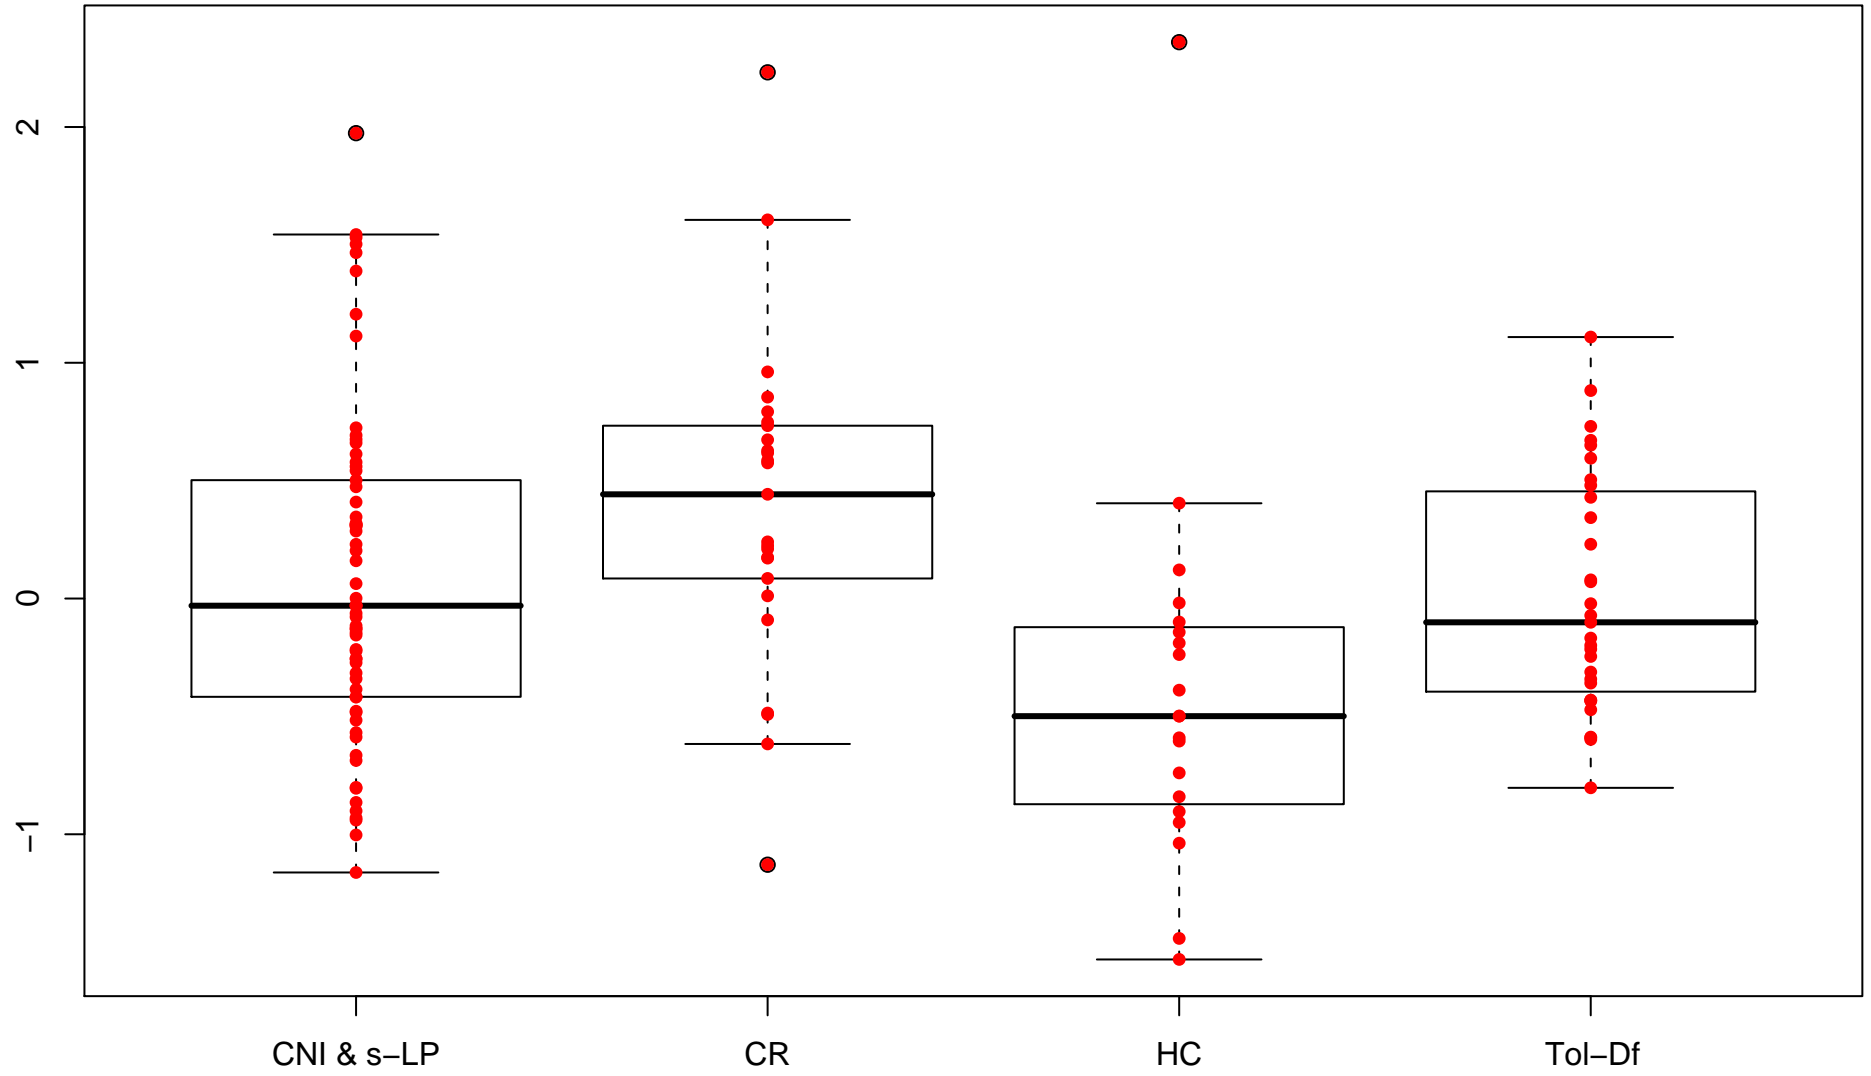

Rank 611 : ZDHHC4  
0.000497

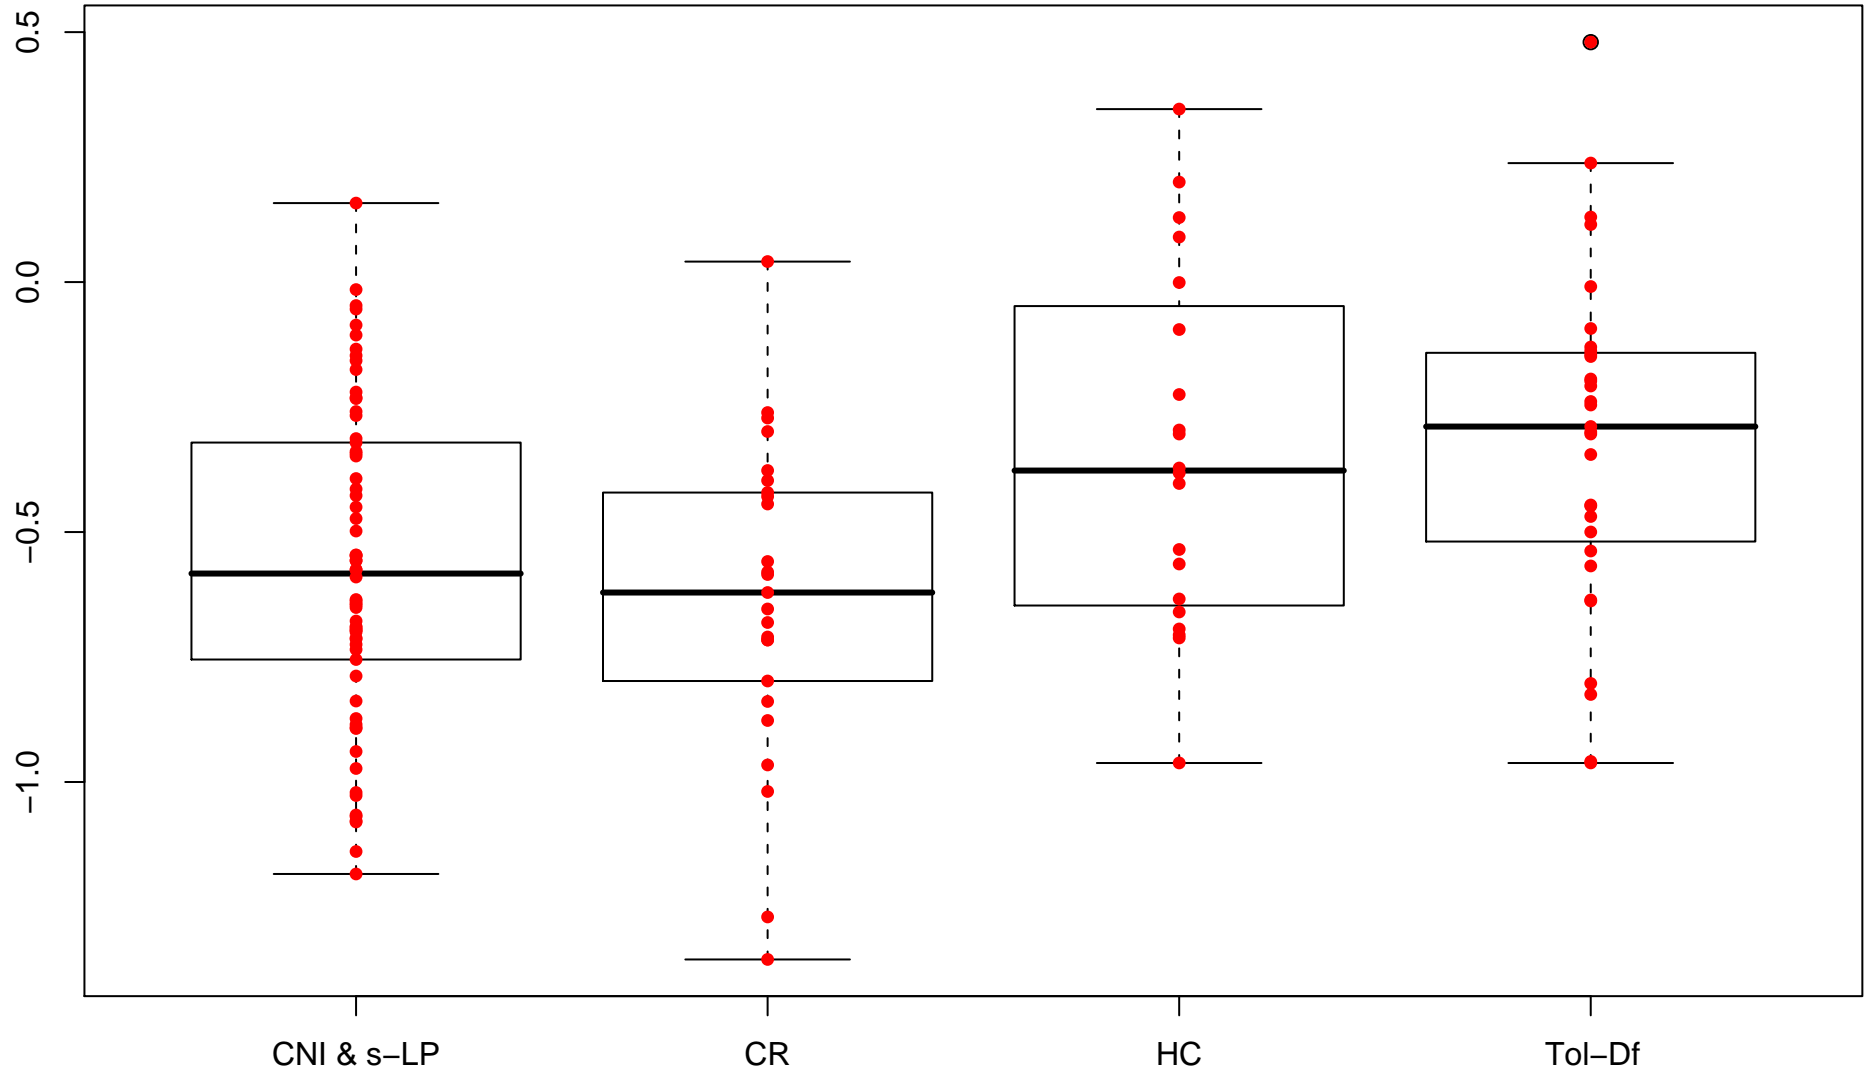

Rank 612 : TLOC1  
0.0005034

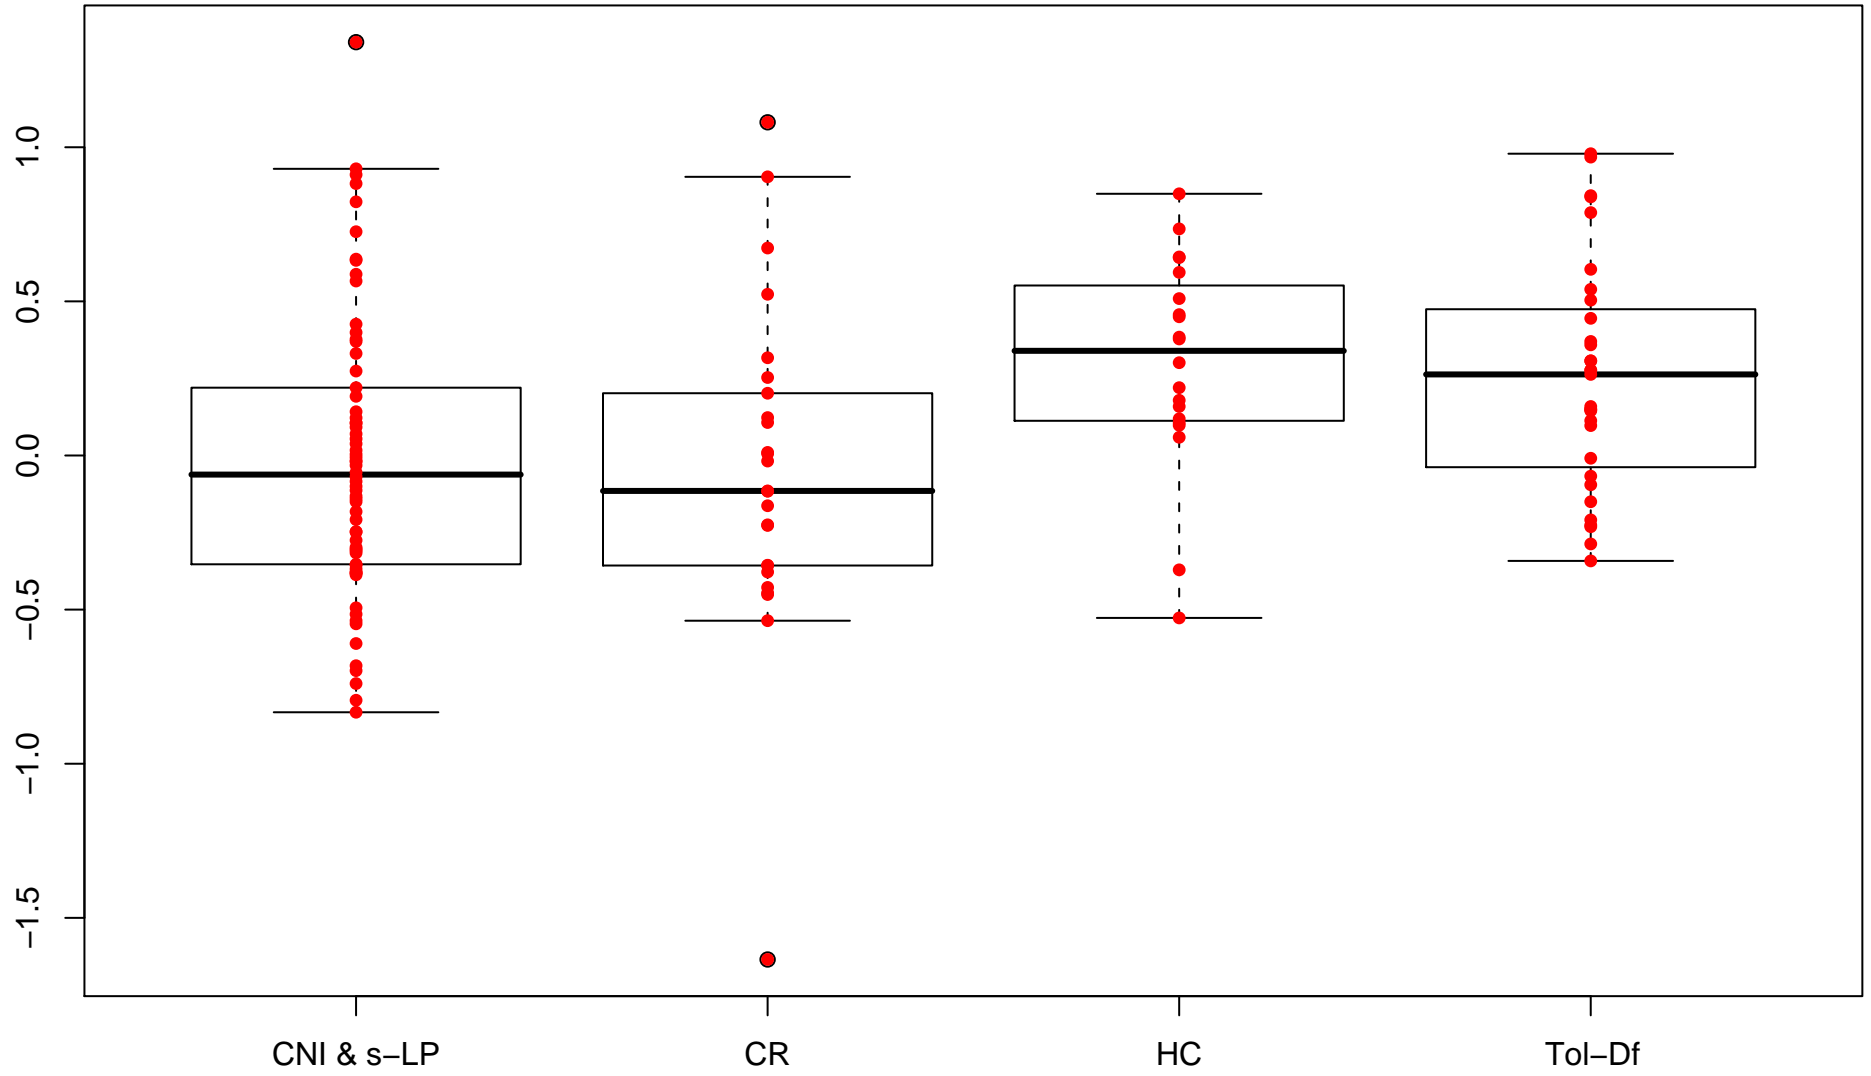

Rank 613 : C5ORF37  
0.0005077

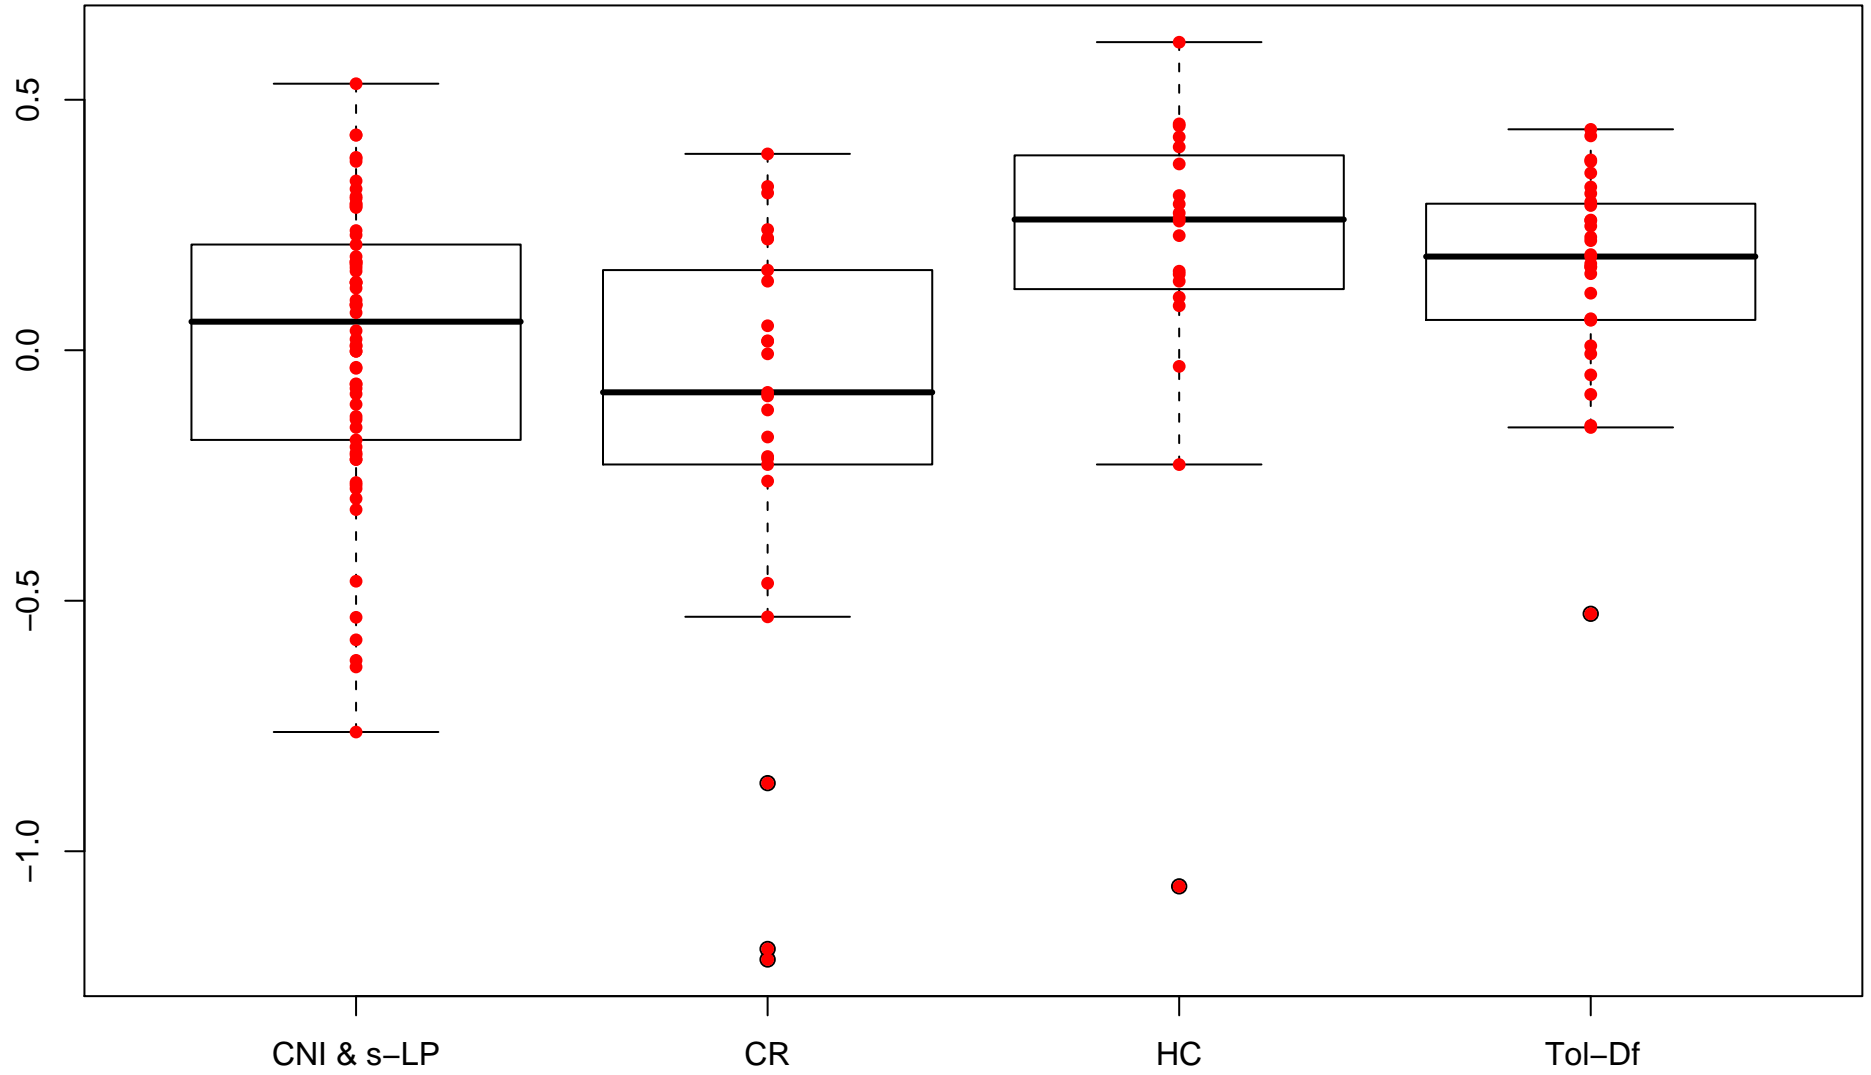

Rank 614 : PGM5  
0.0005105

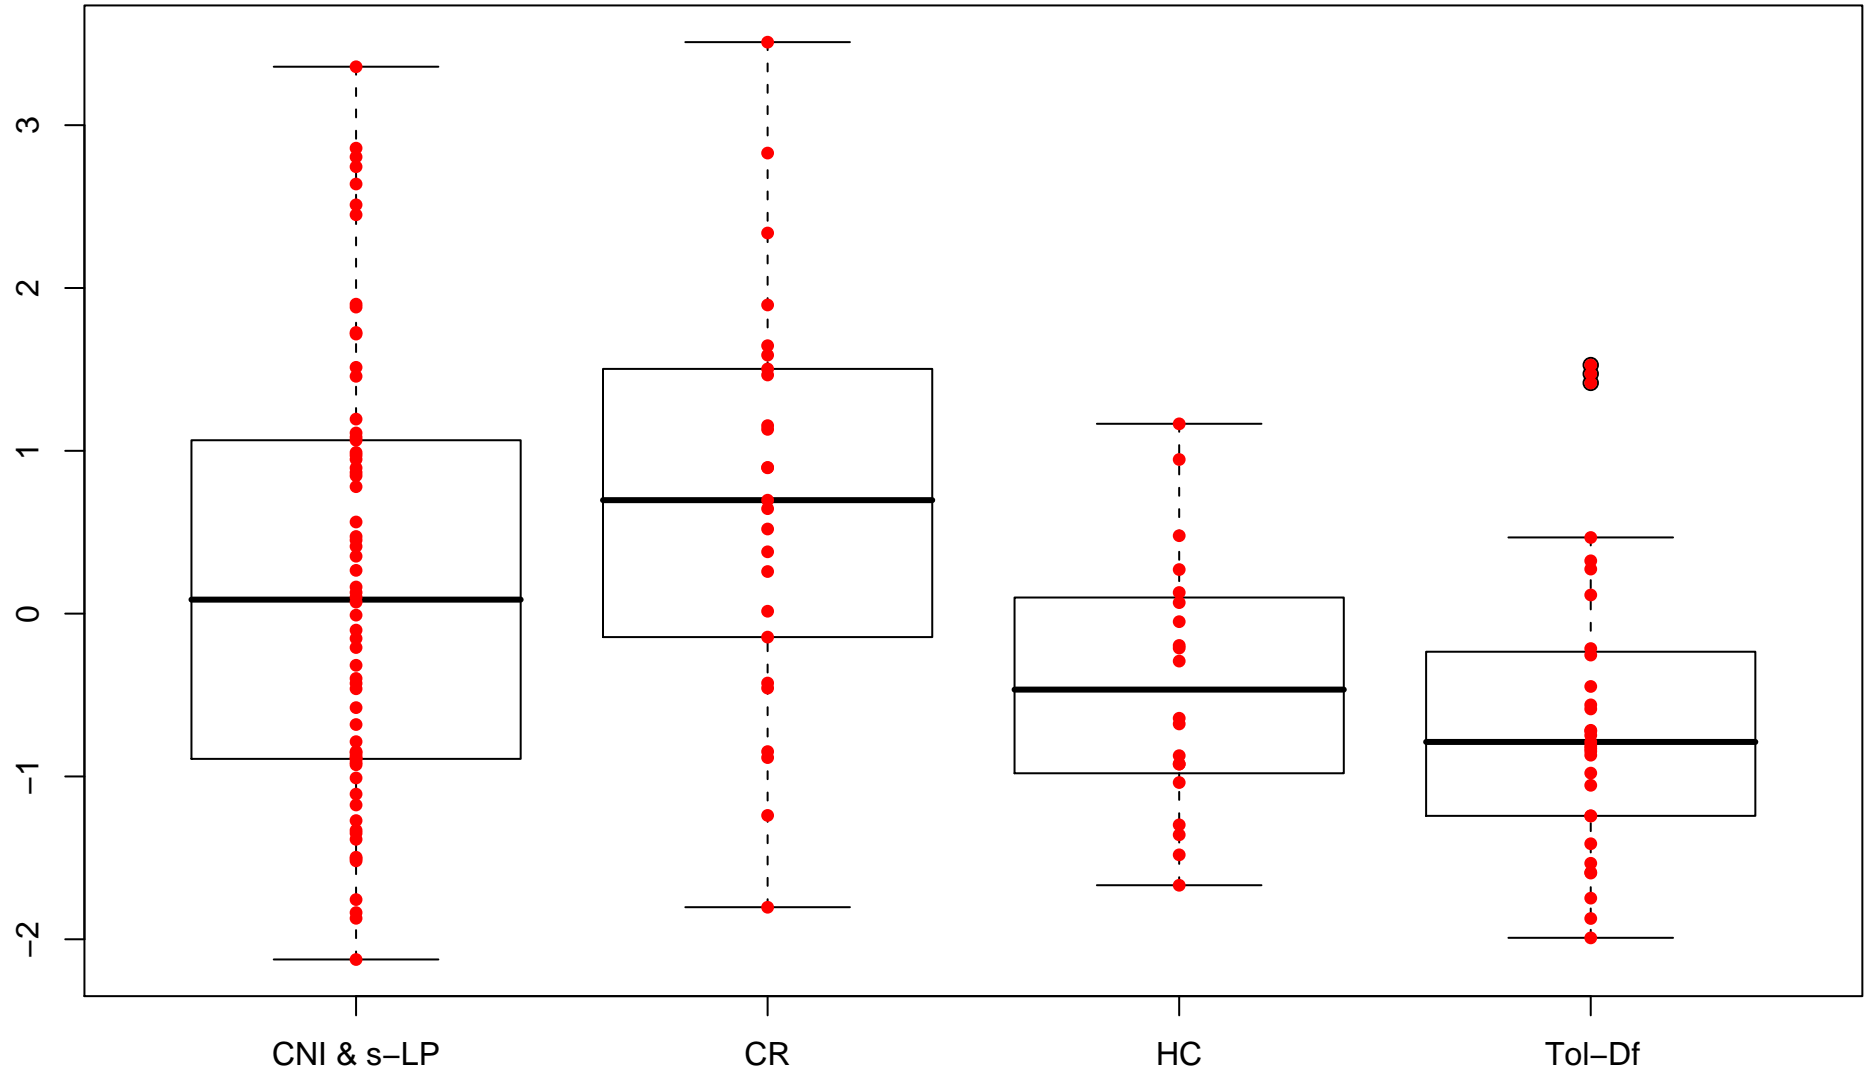

Rank 615 : MTERFD2  
0.0005127

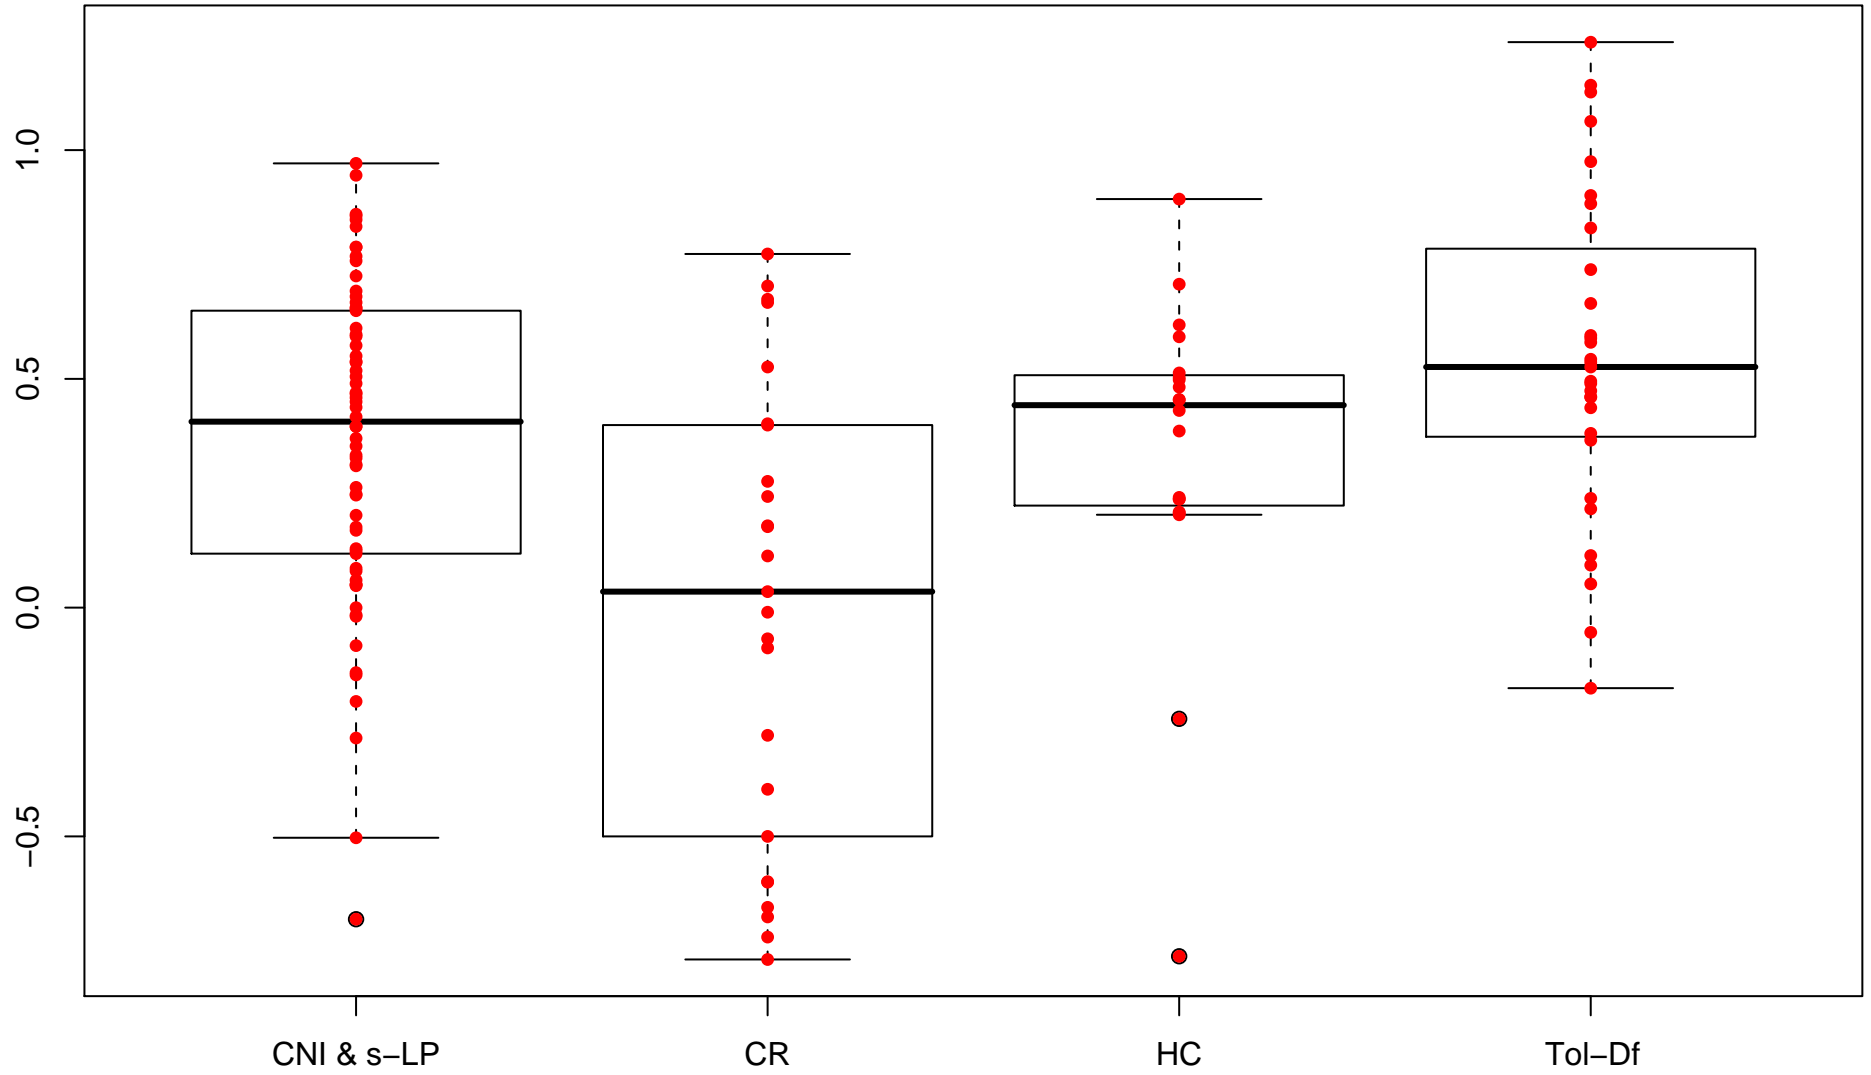



Rank 616 : GTL3  
0.0005154

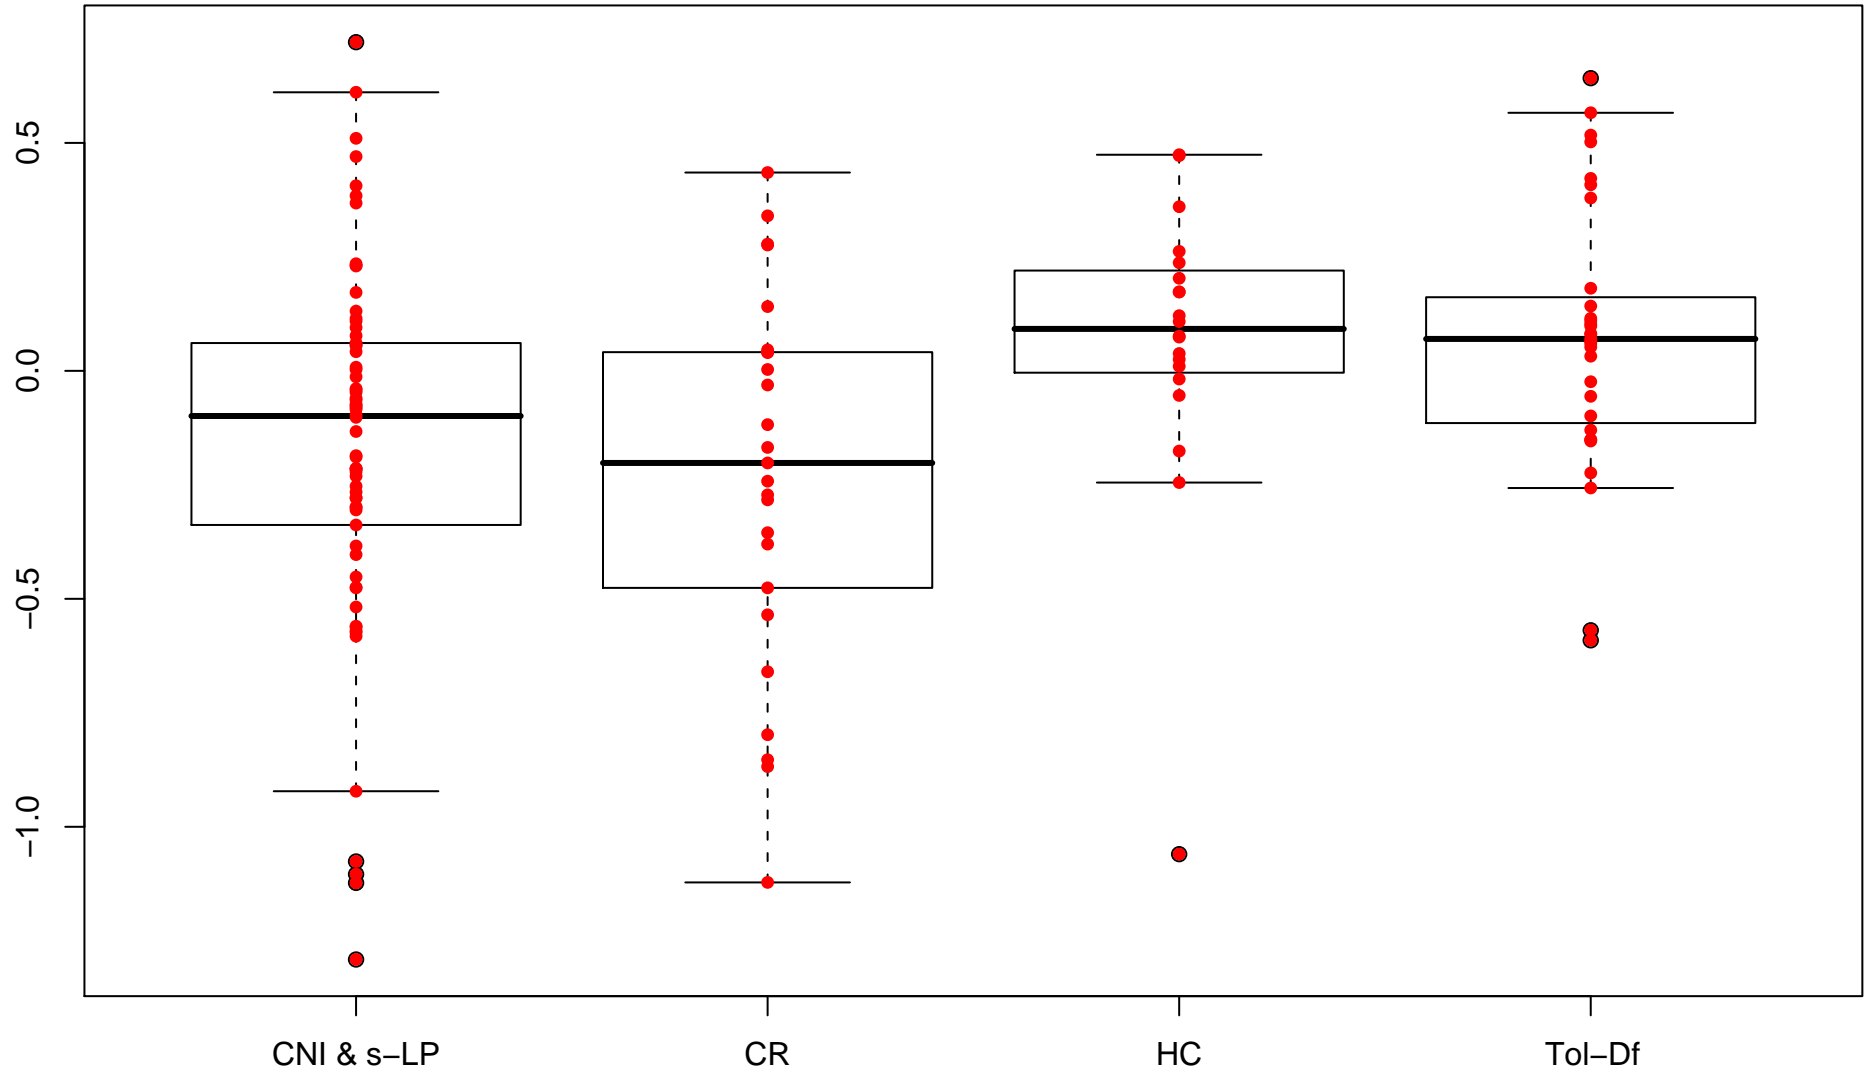

Rank 617 : AK094334  
0.0005166

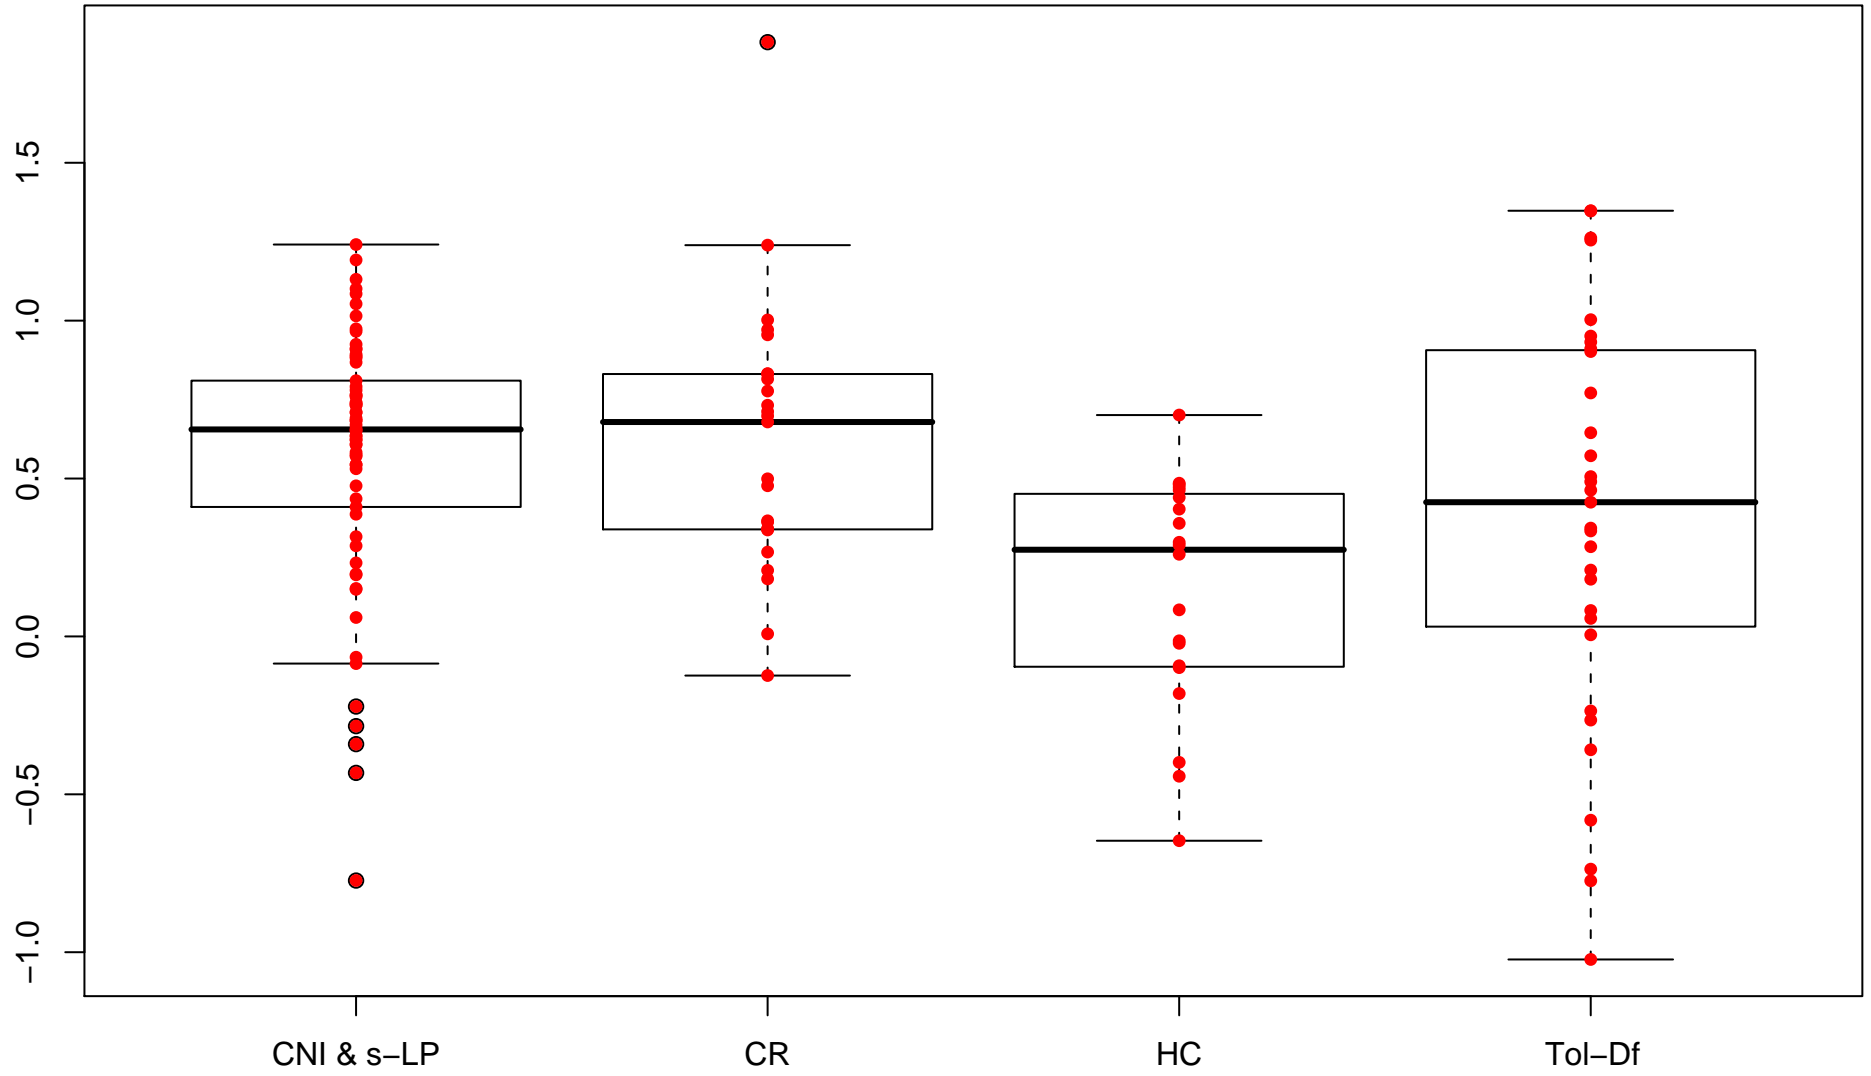

Rank 618 : CCR5  
0.0005214

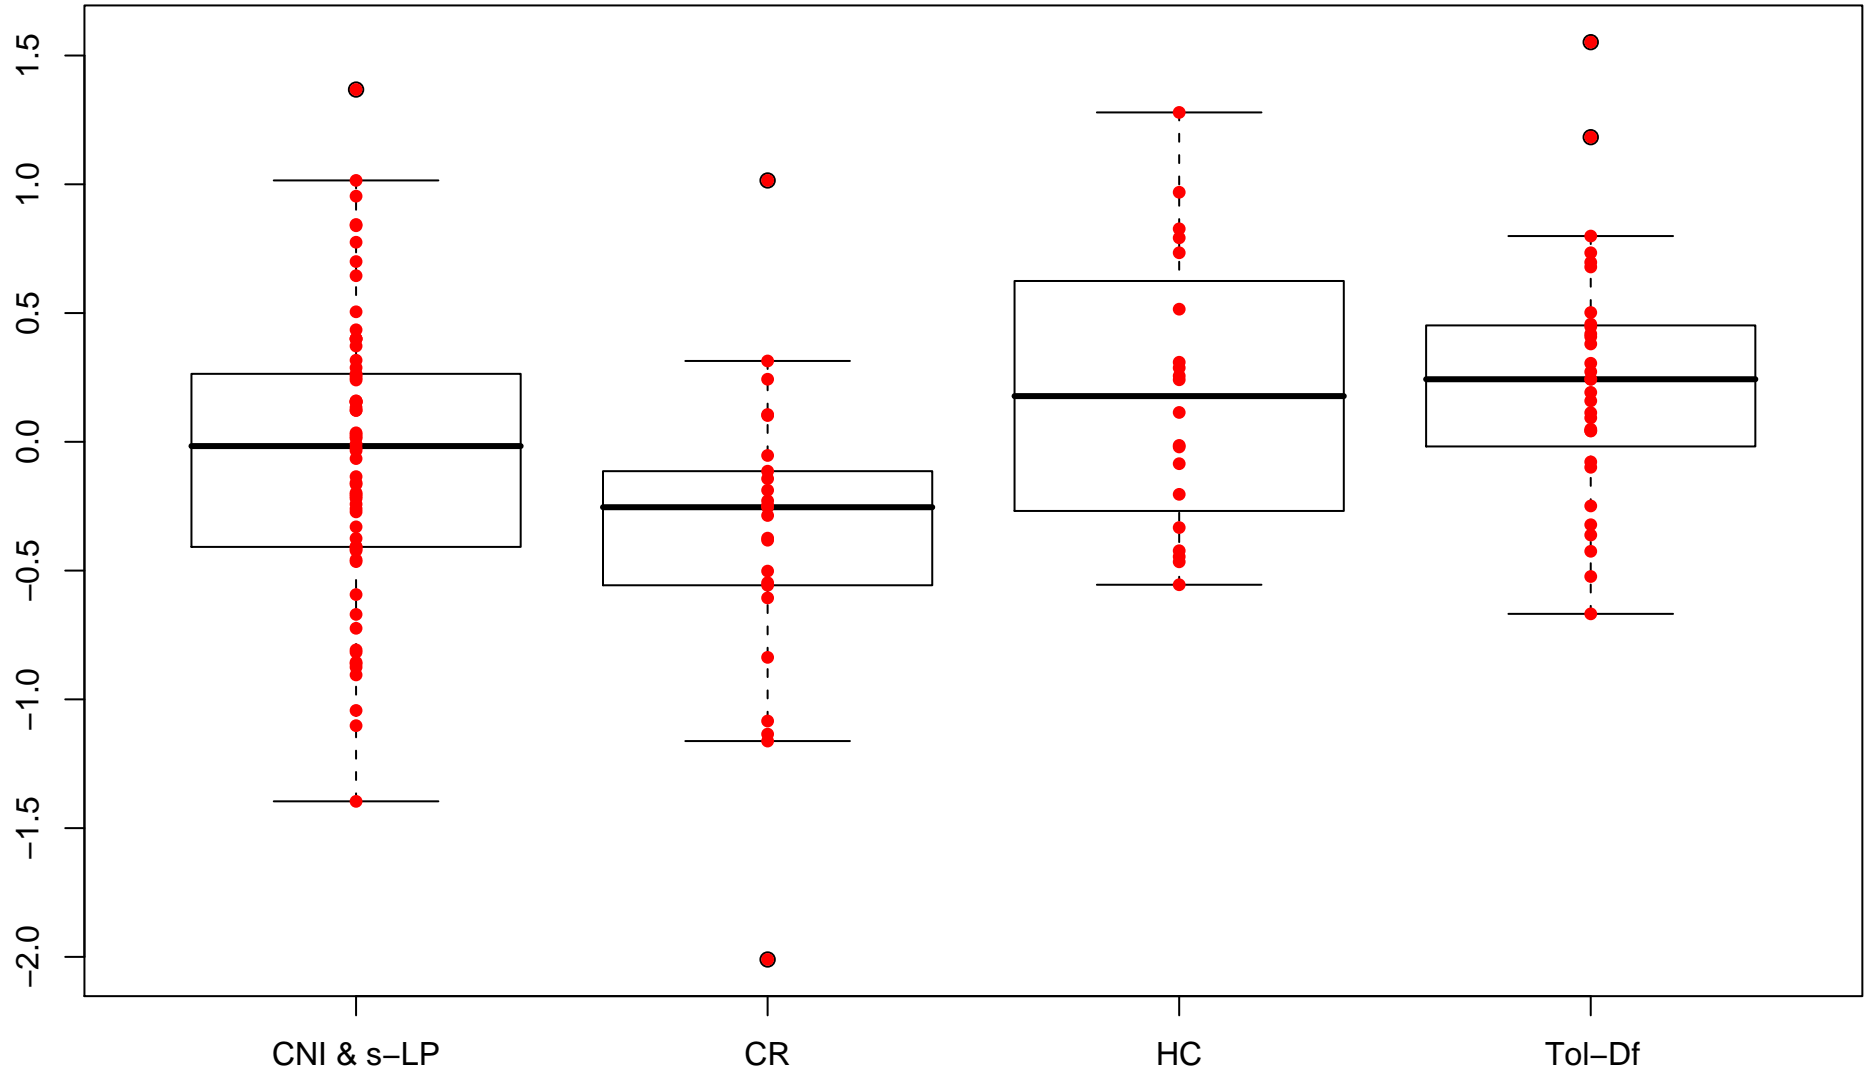

Rank 619 : RBM3  
0.0005248

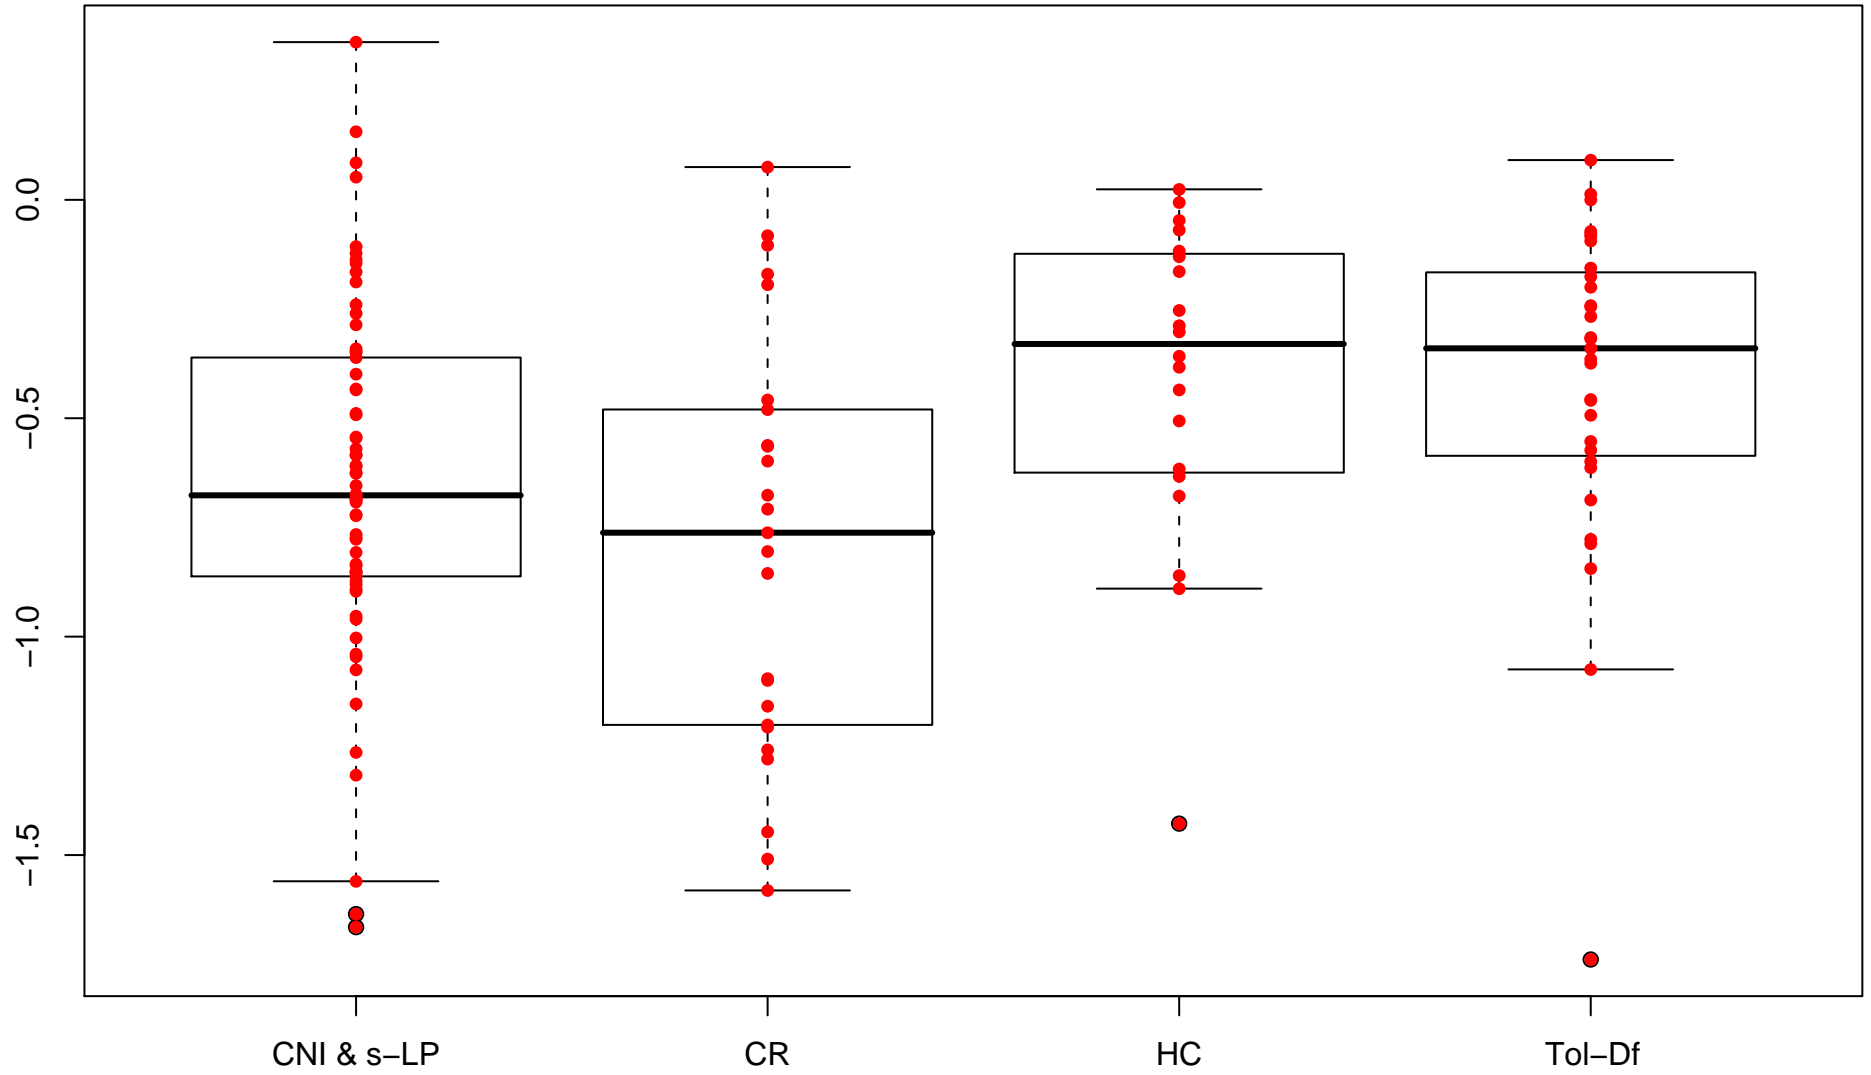

Rank 620 : AK095831  
0.0005286

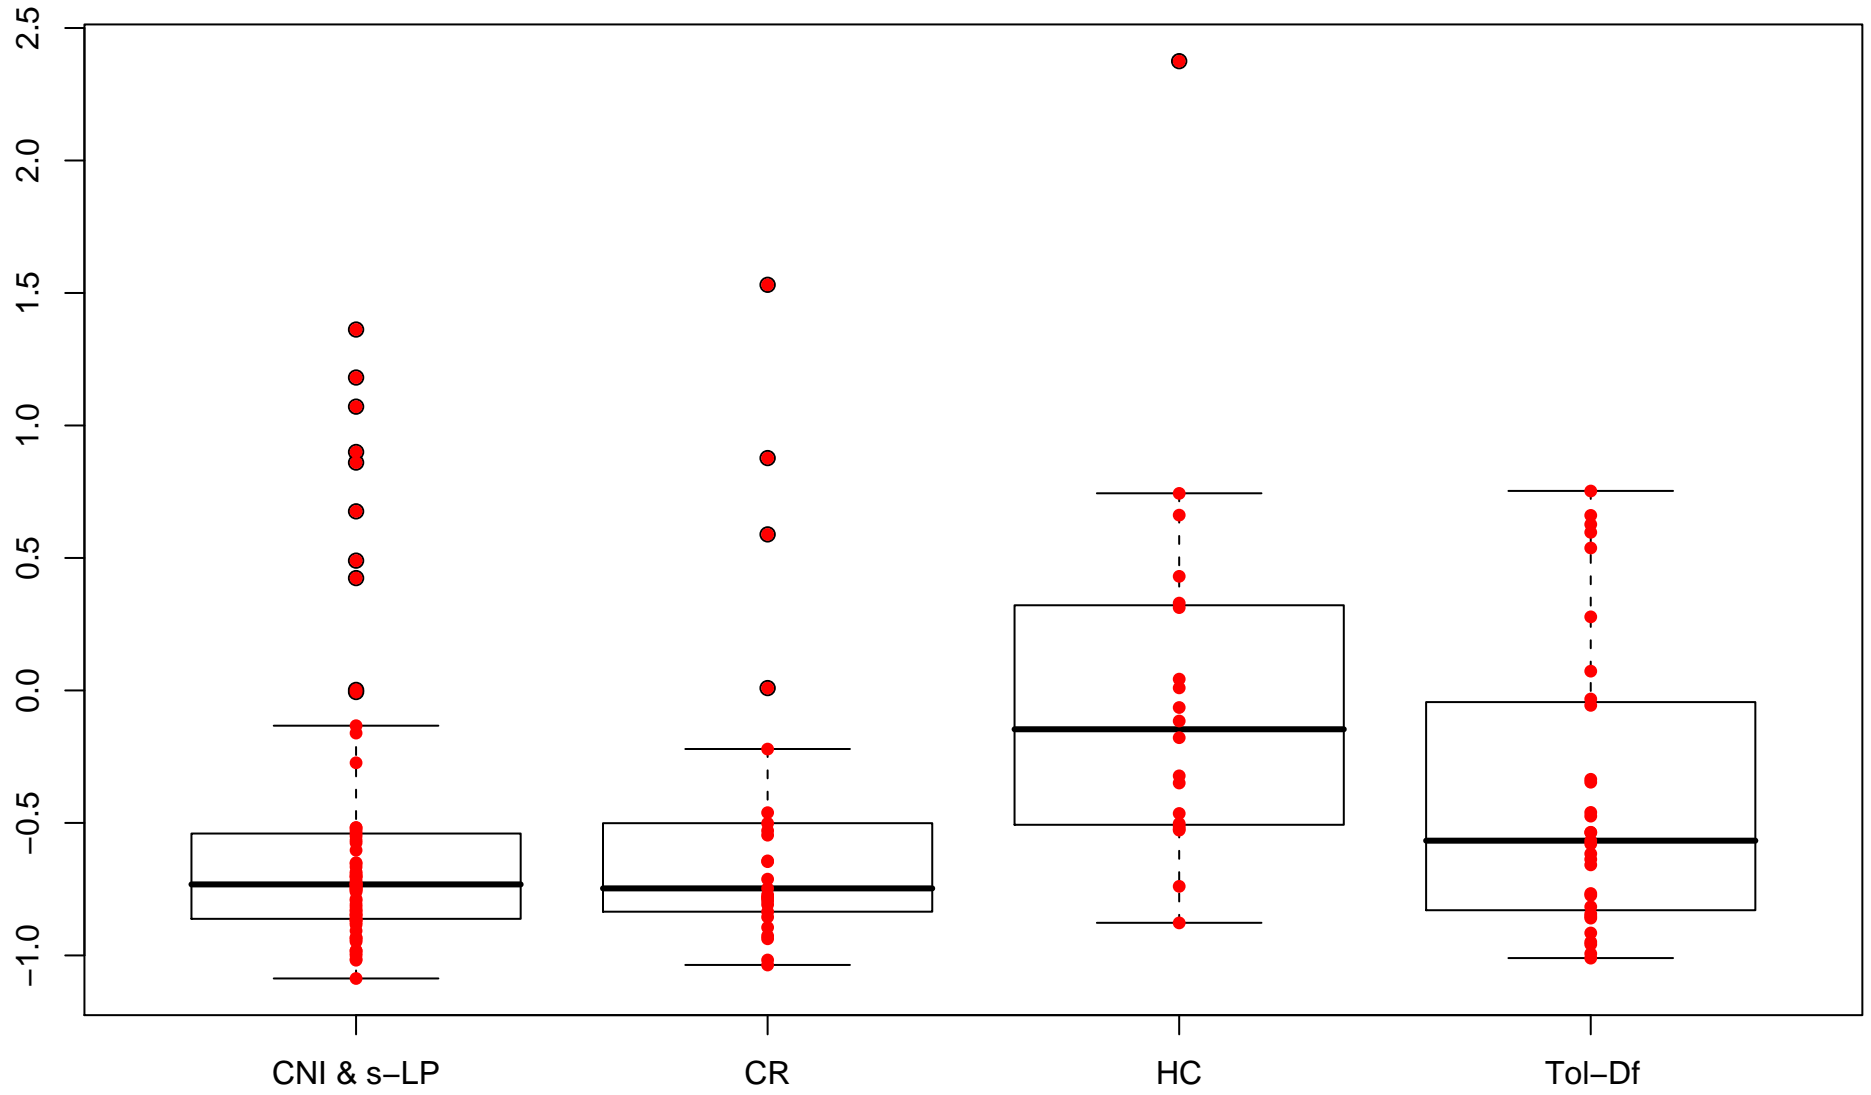

Rank 621 : AF116673  
0.0005379

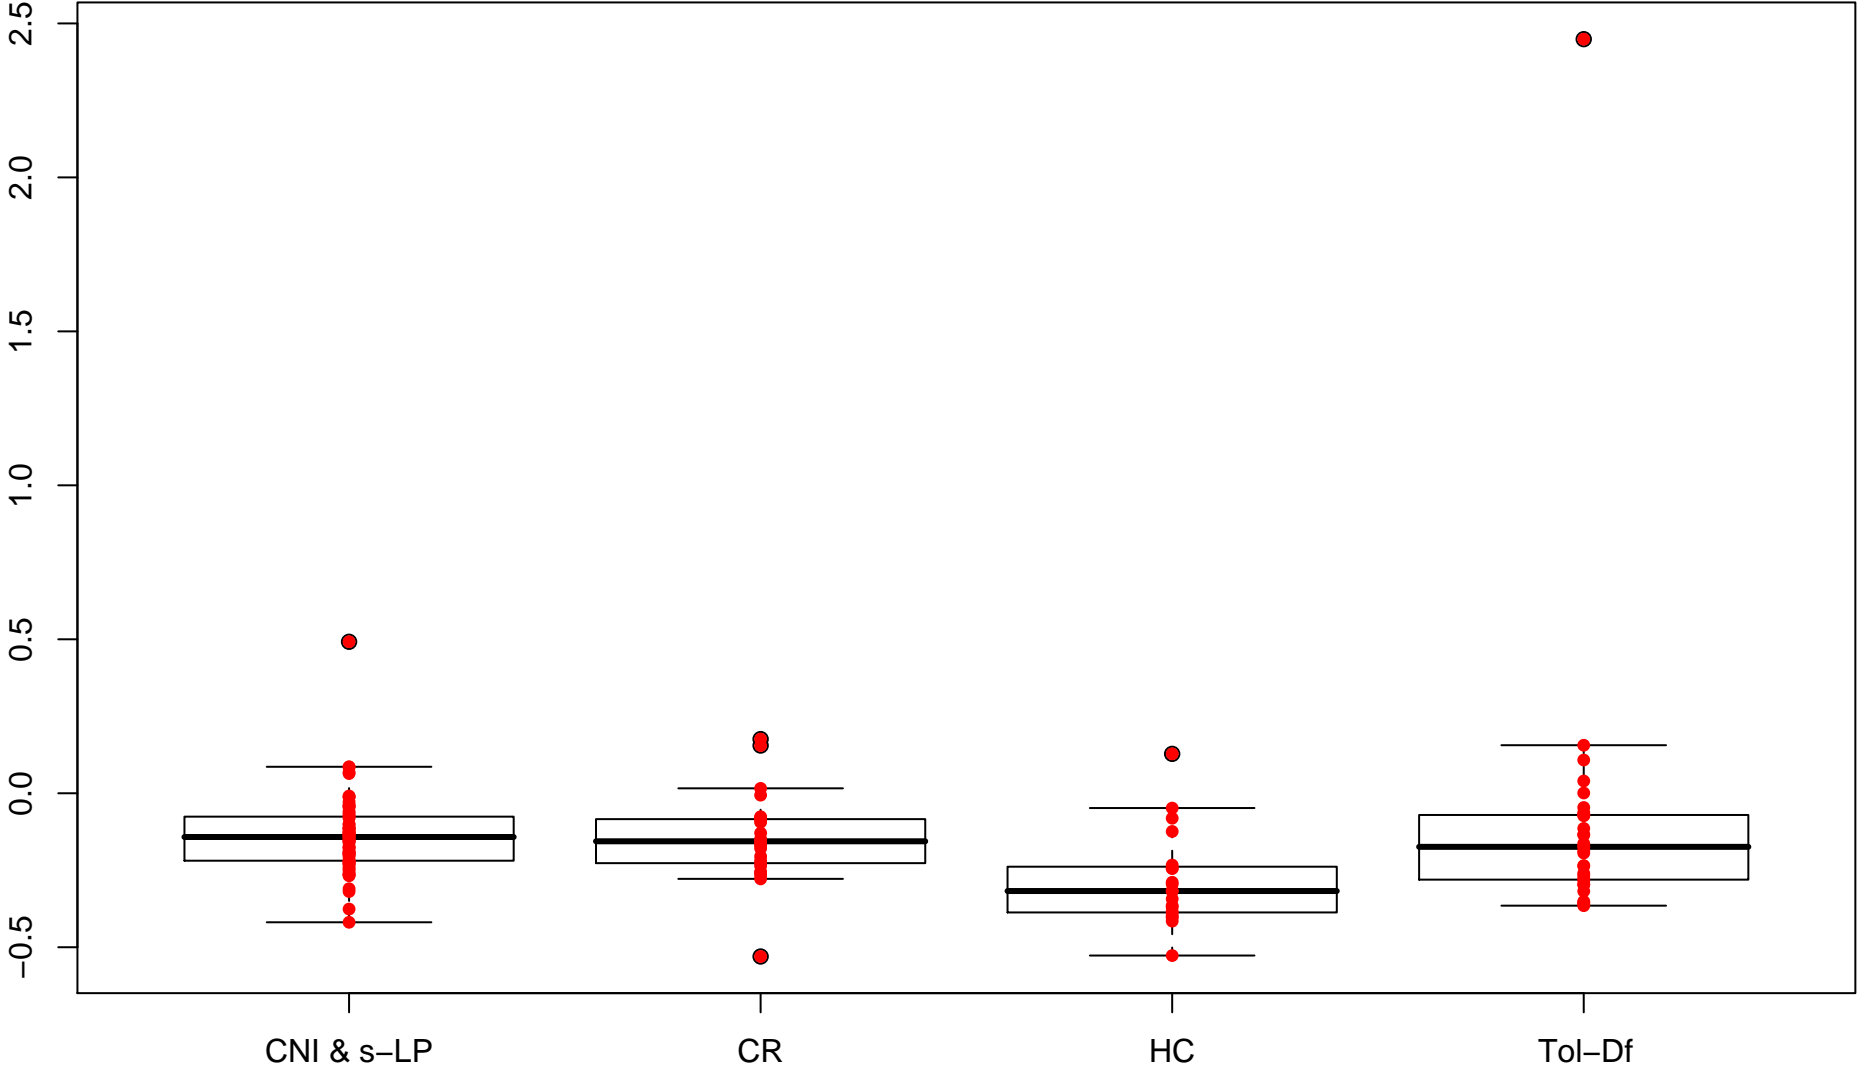

Rank 622 : LOC162632  
0.0005396

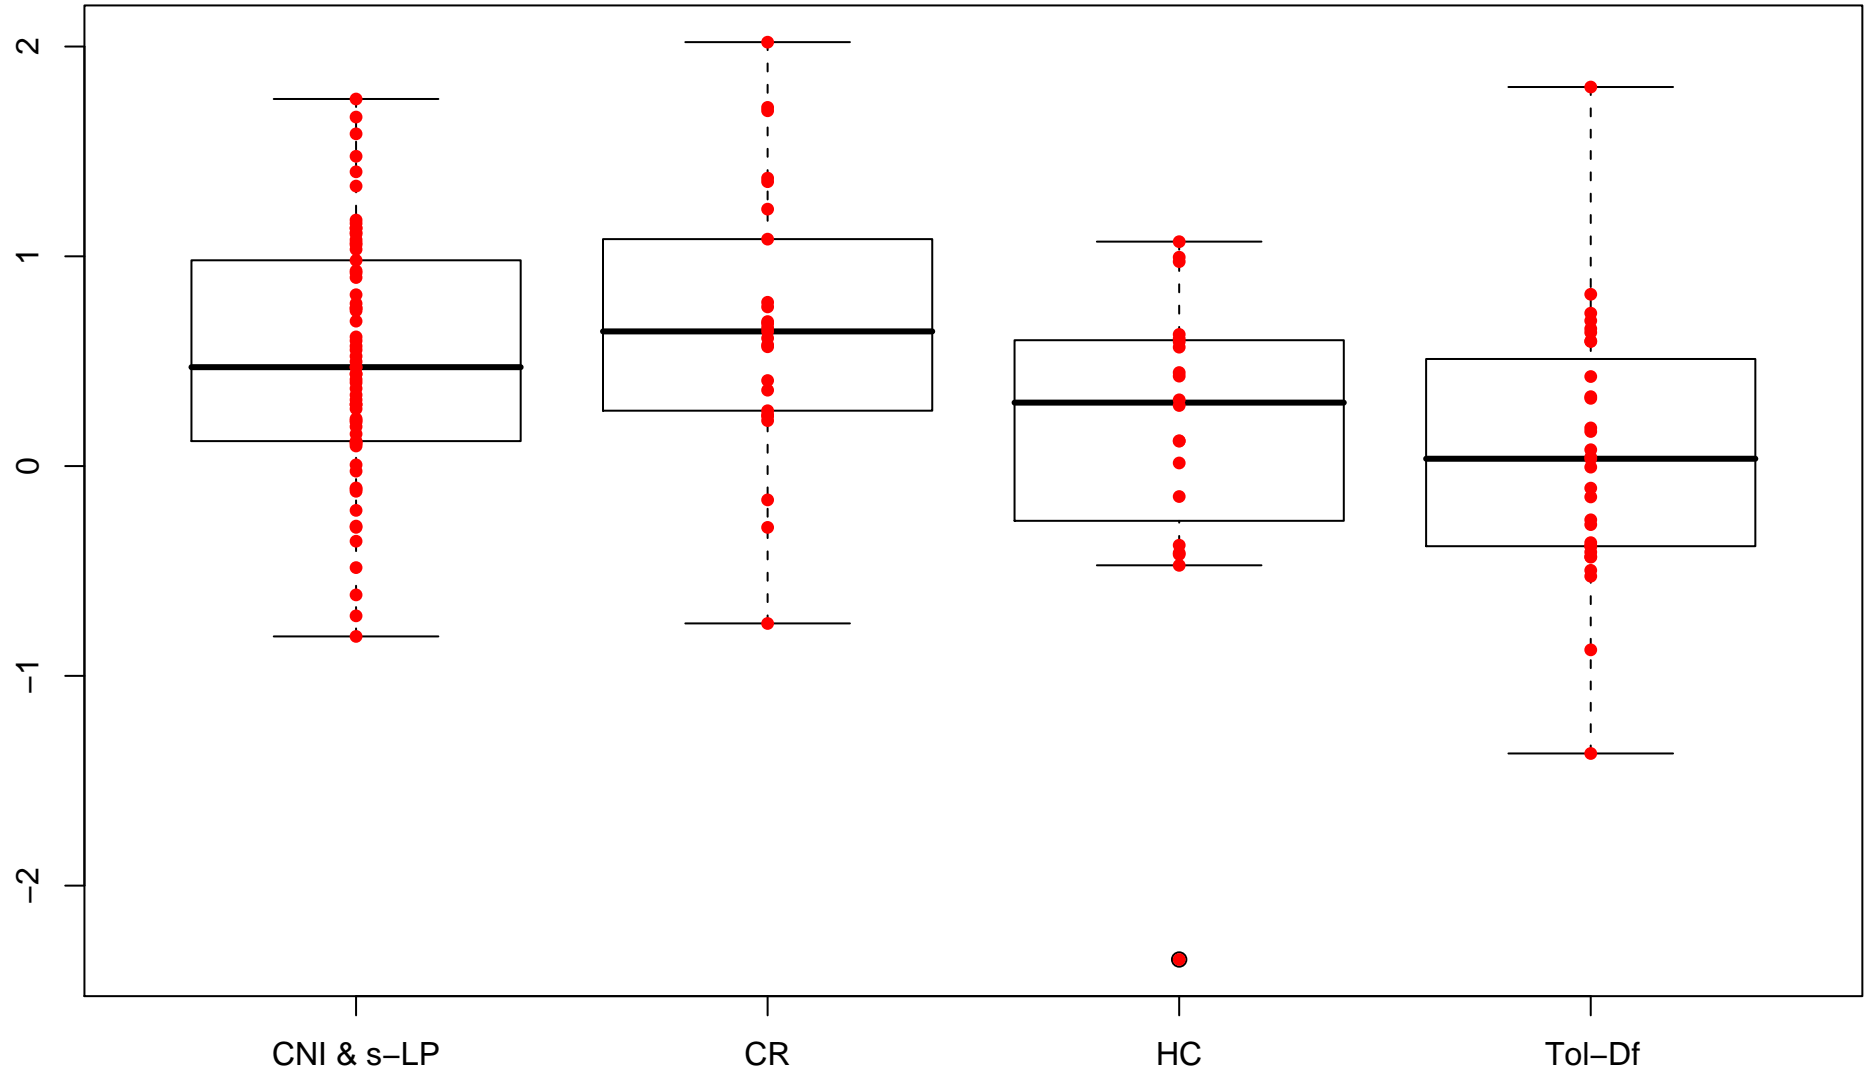

Rank 623 : BASP1  
0.0005404

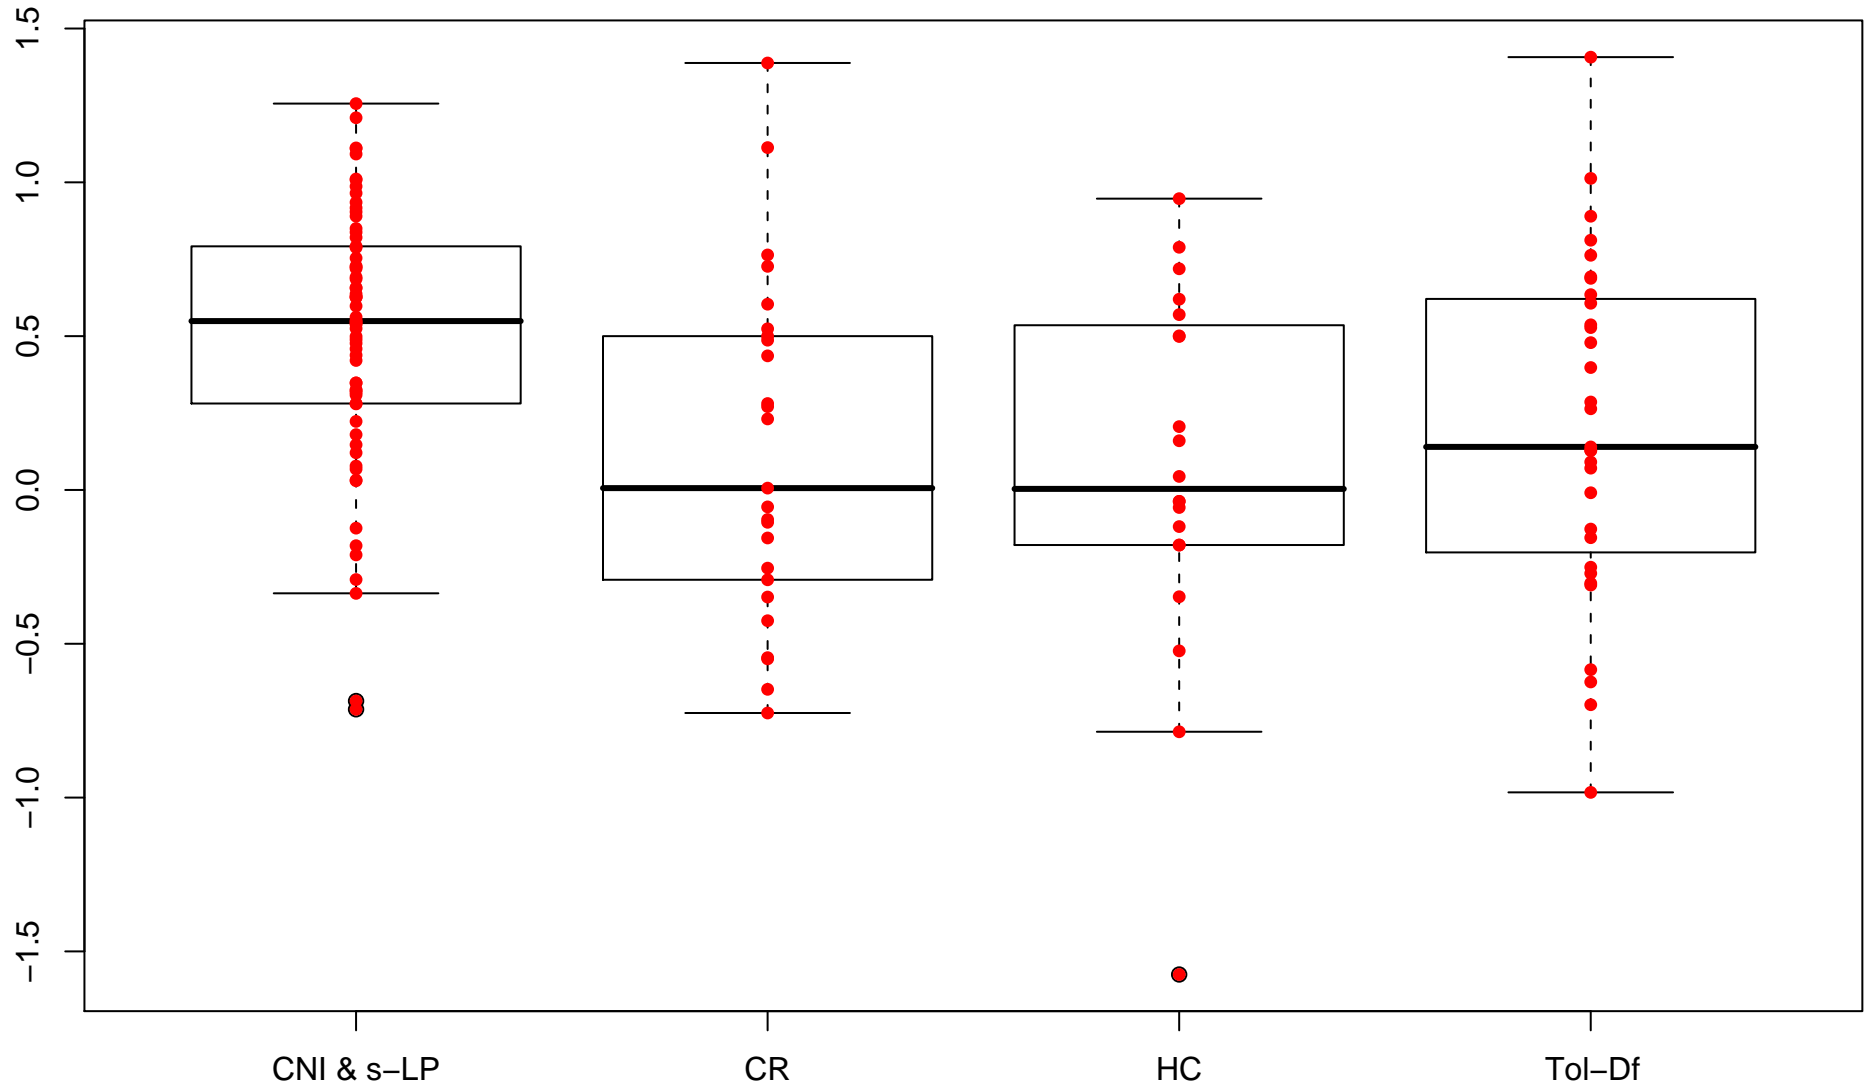



Rank 624 : MIER1  
0.000552

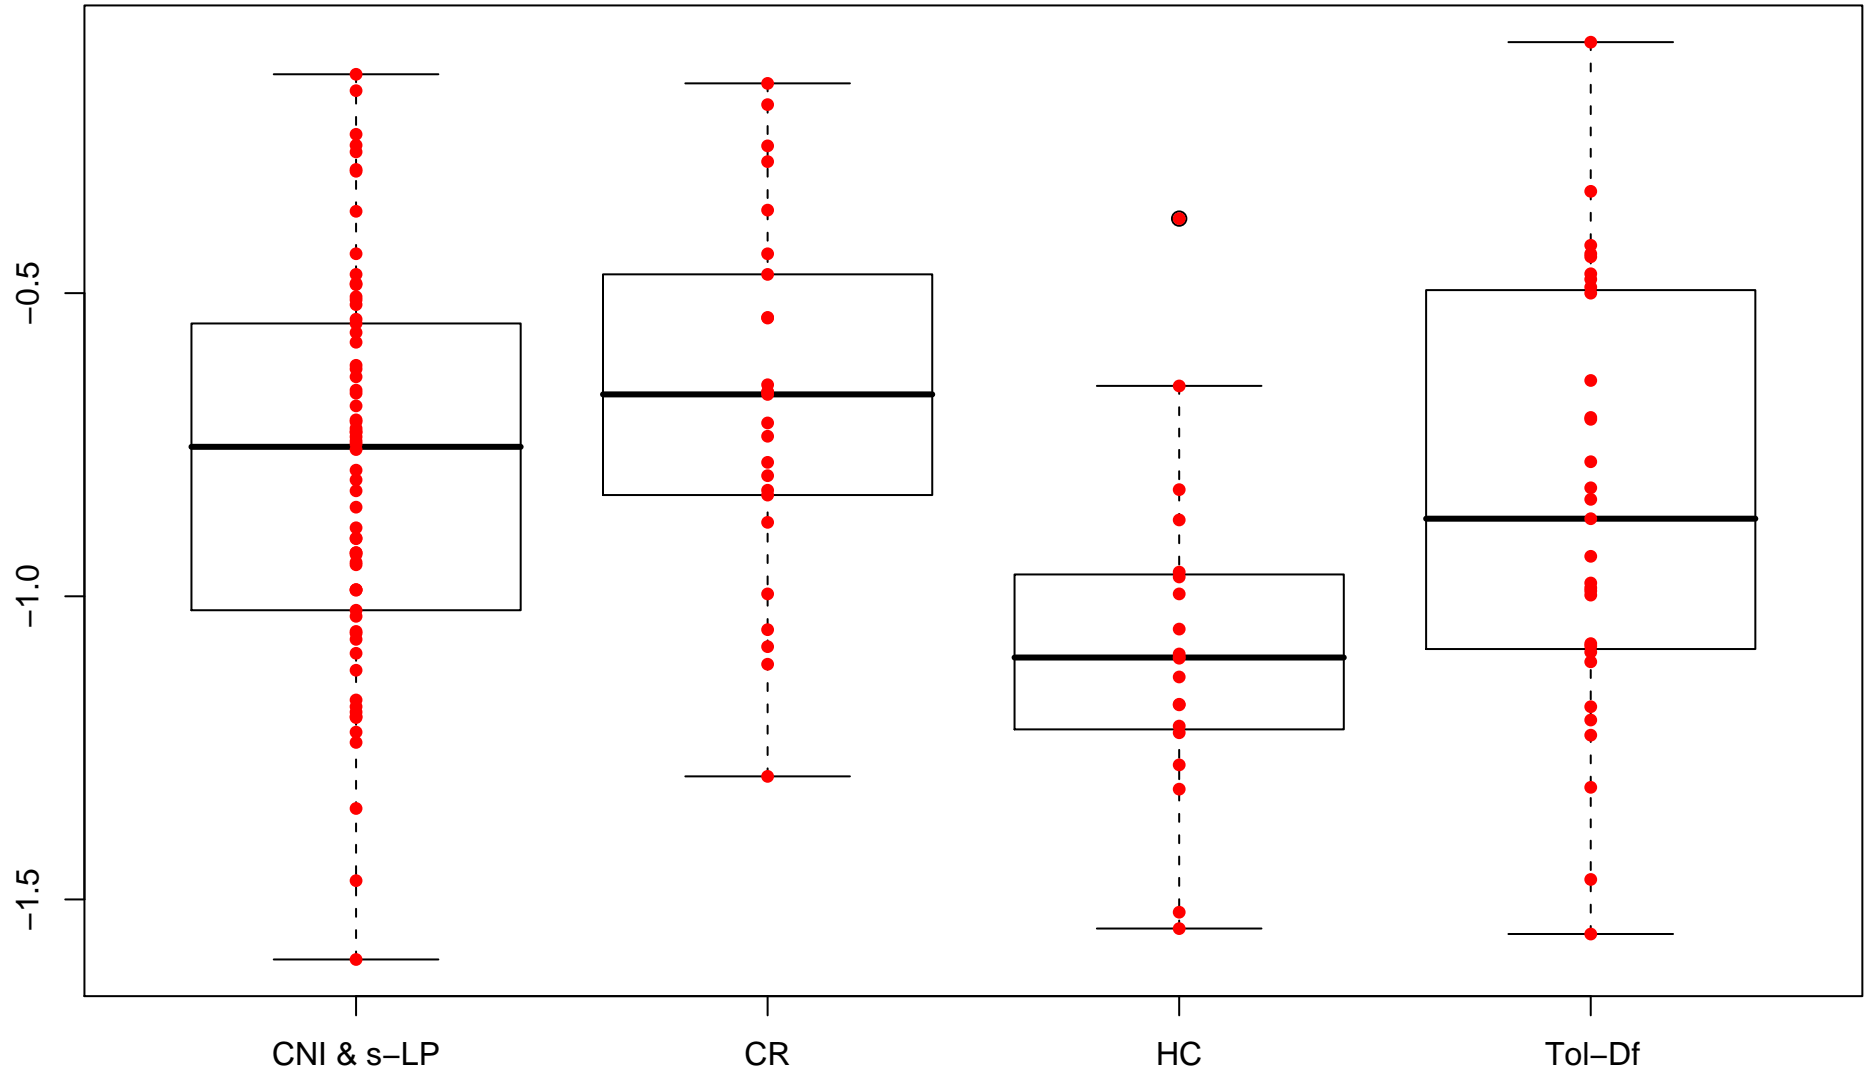

Rank 625 : TAF1B  
0.000554

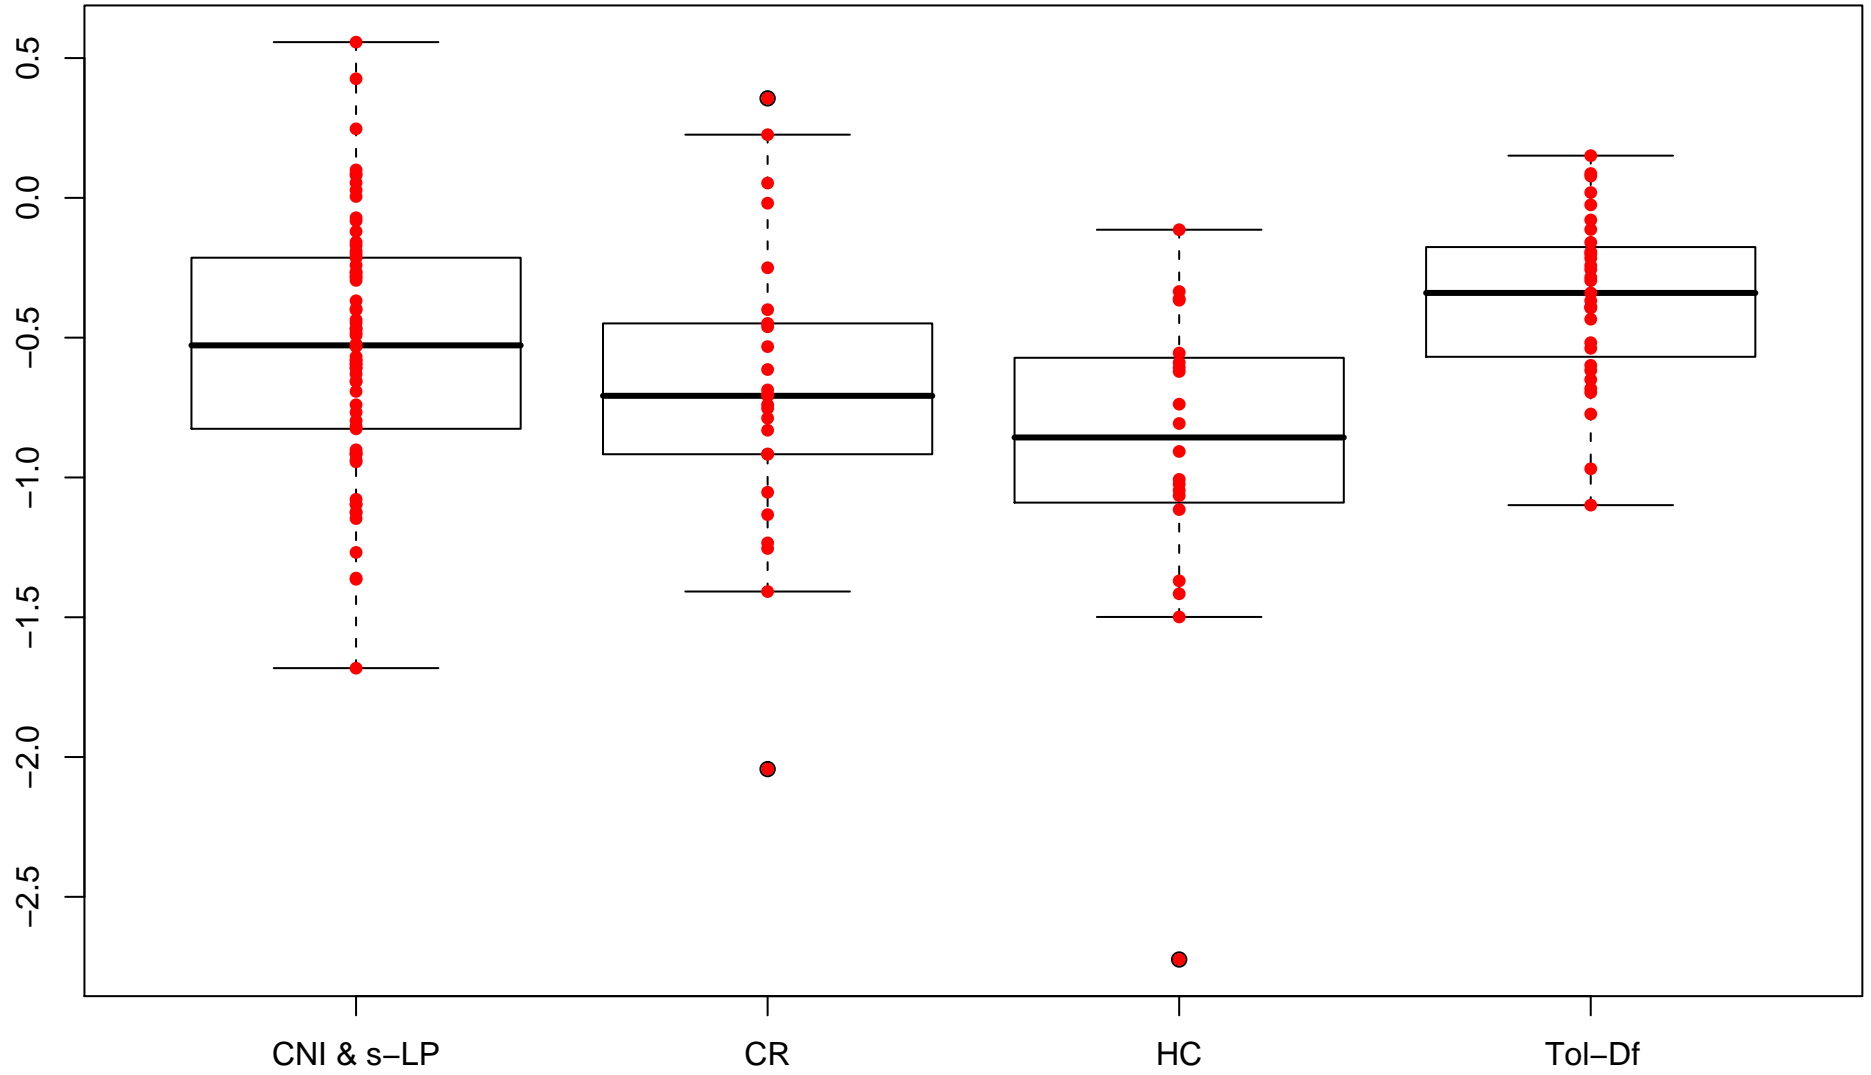

Rank 626 : HSPH1  
0.0005551

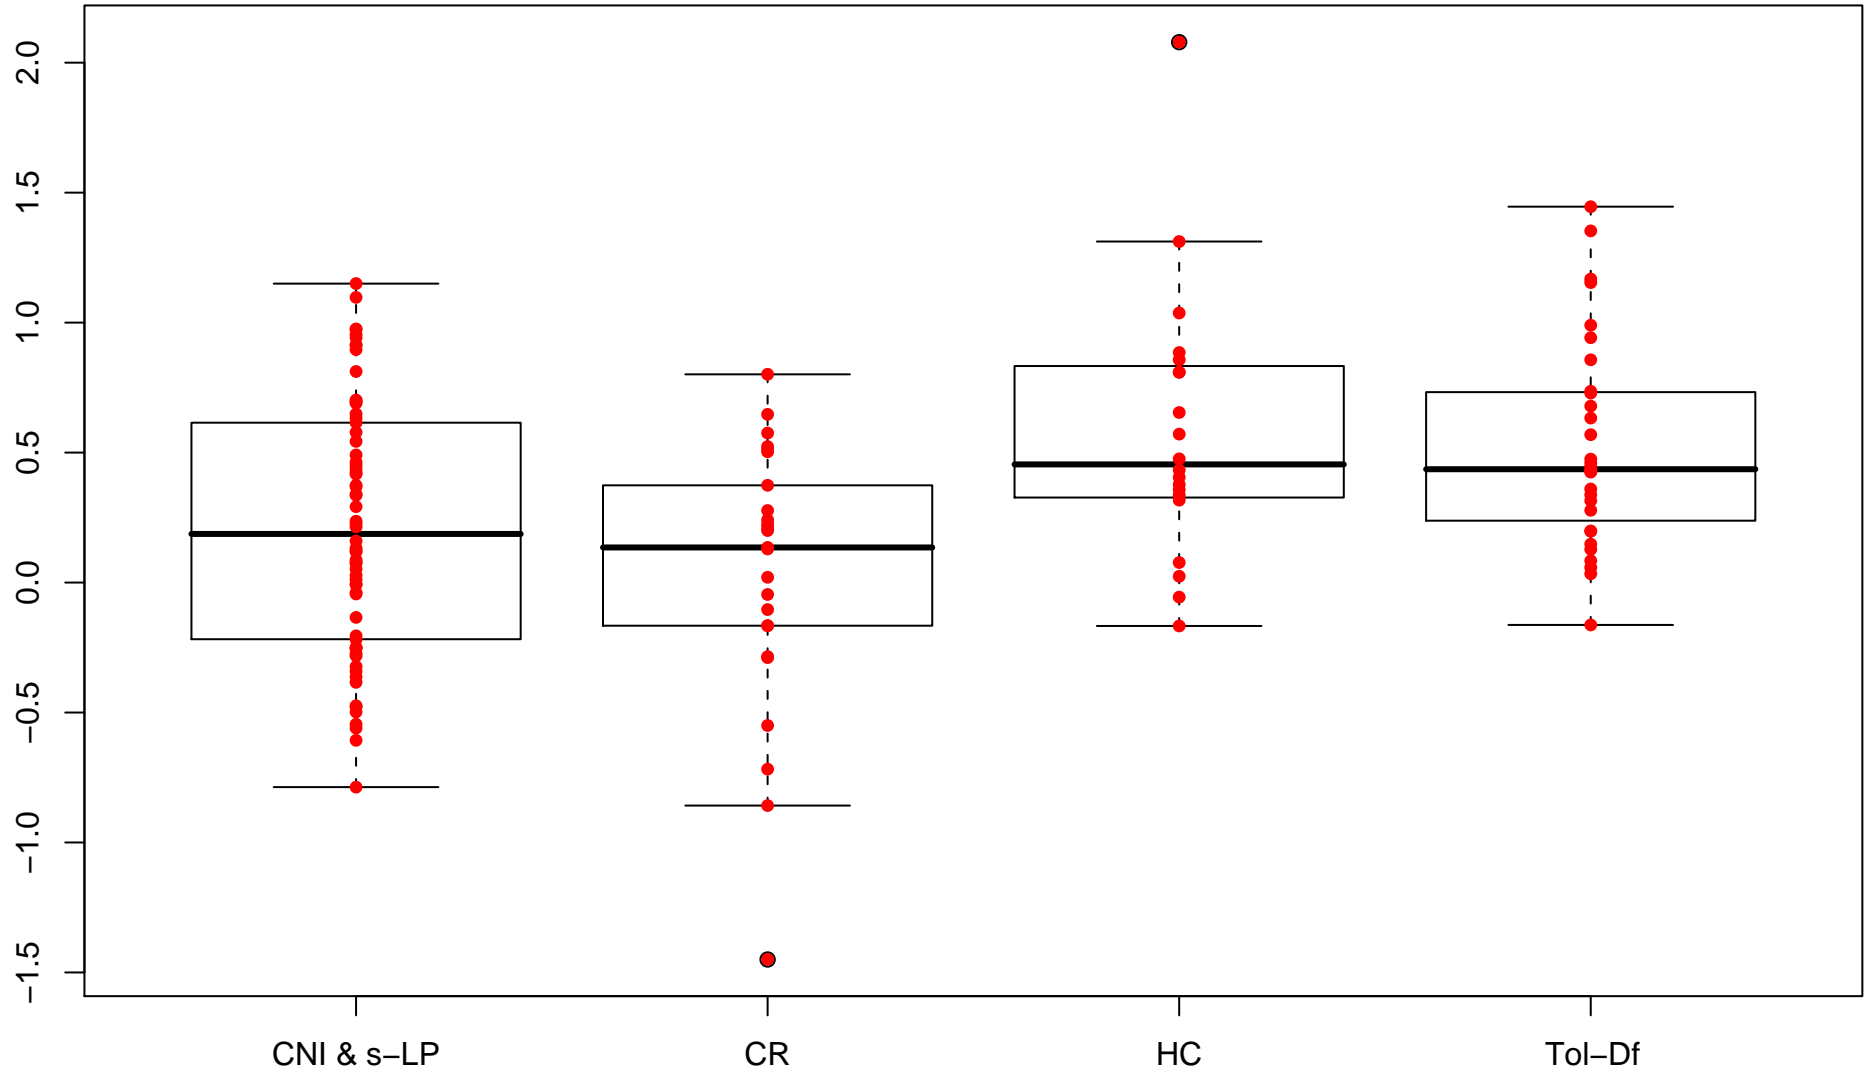

Rank 627 : GCSH  
0.000557

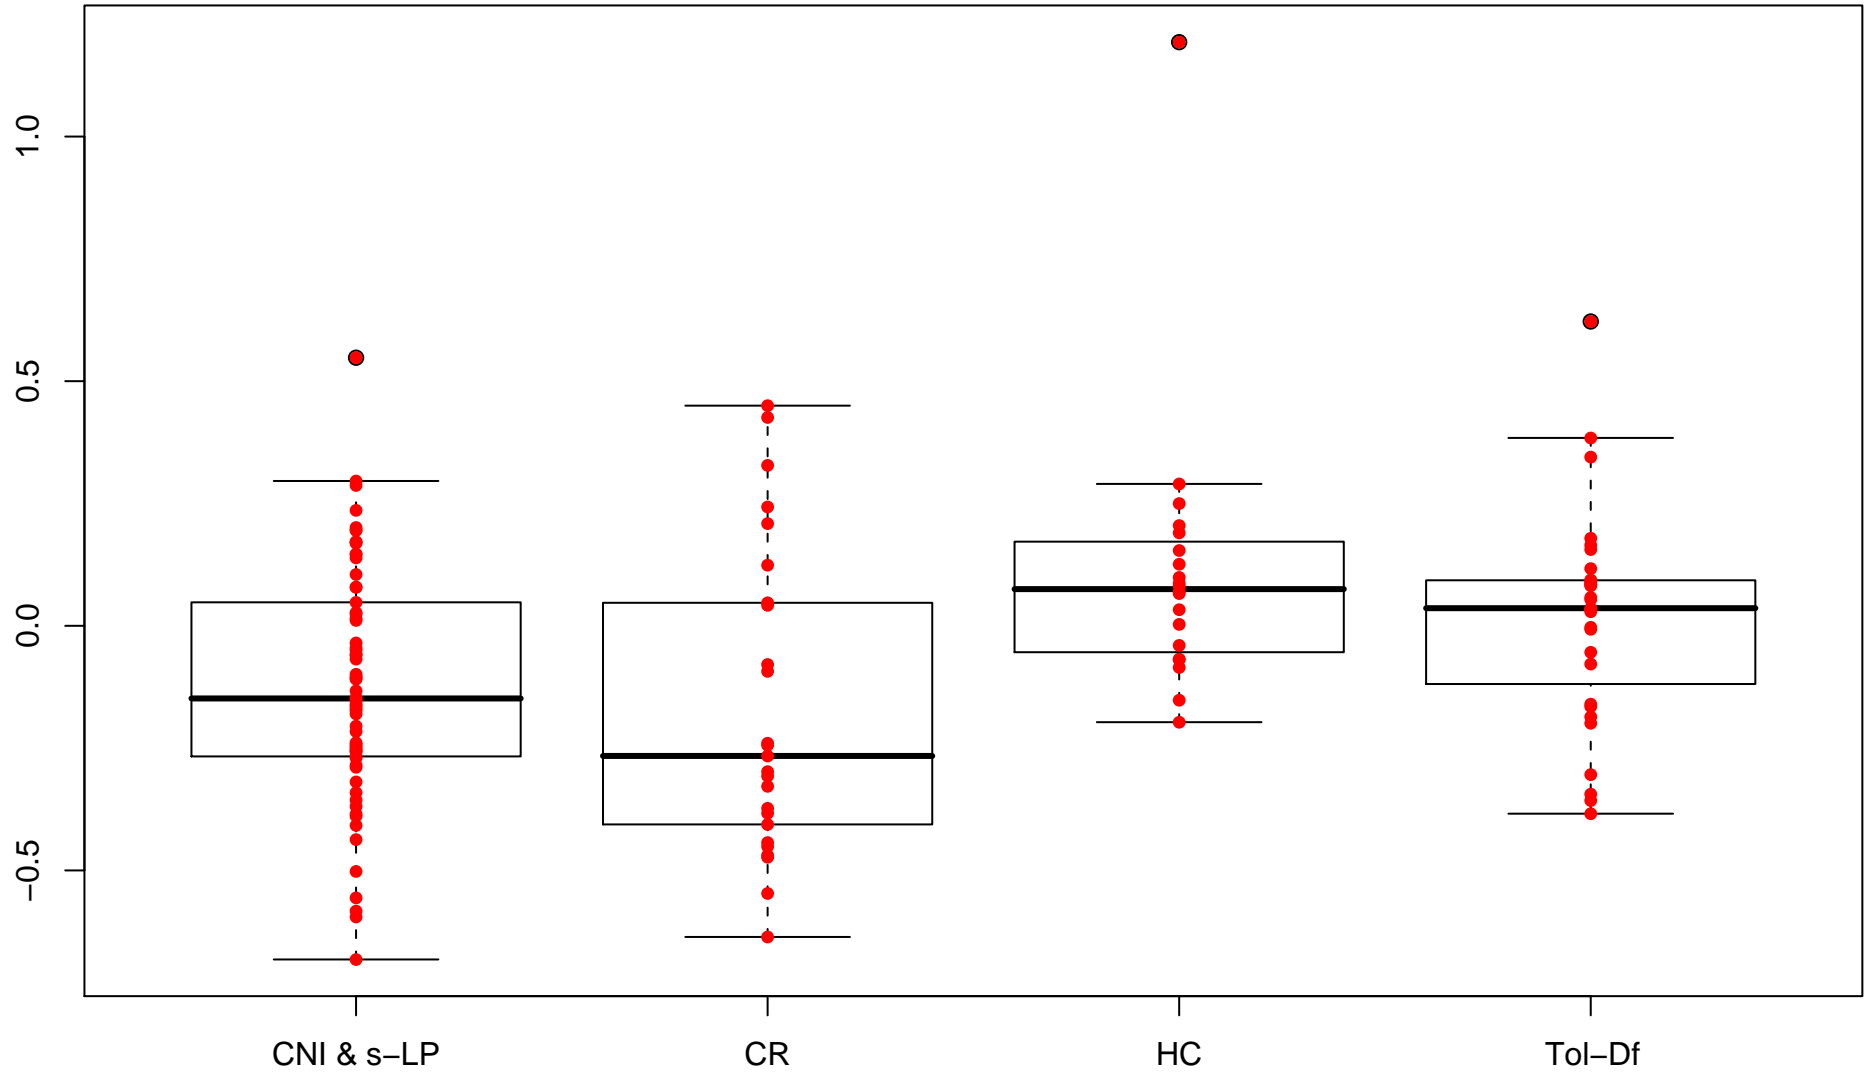

Rank 628 : PTPN11  
0.0005587

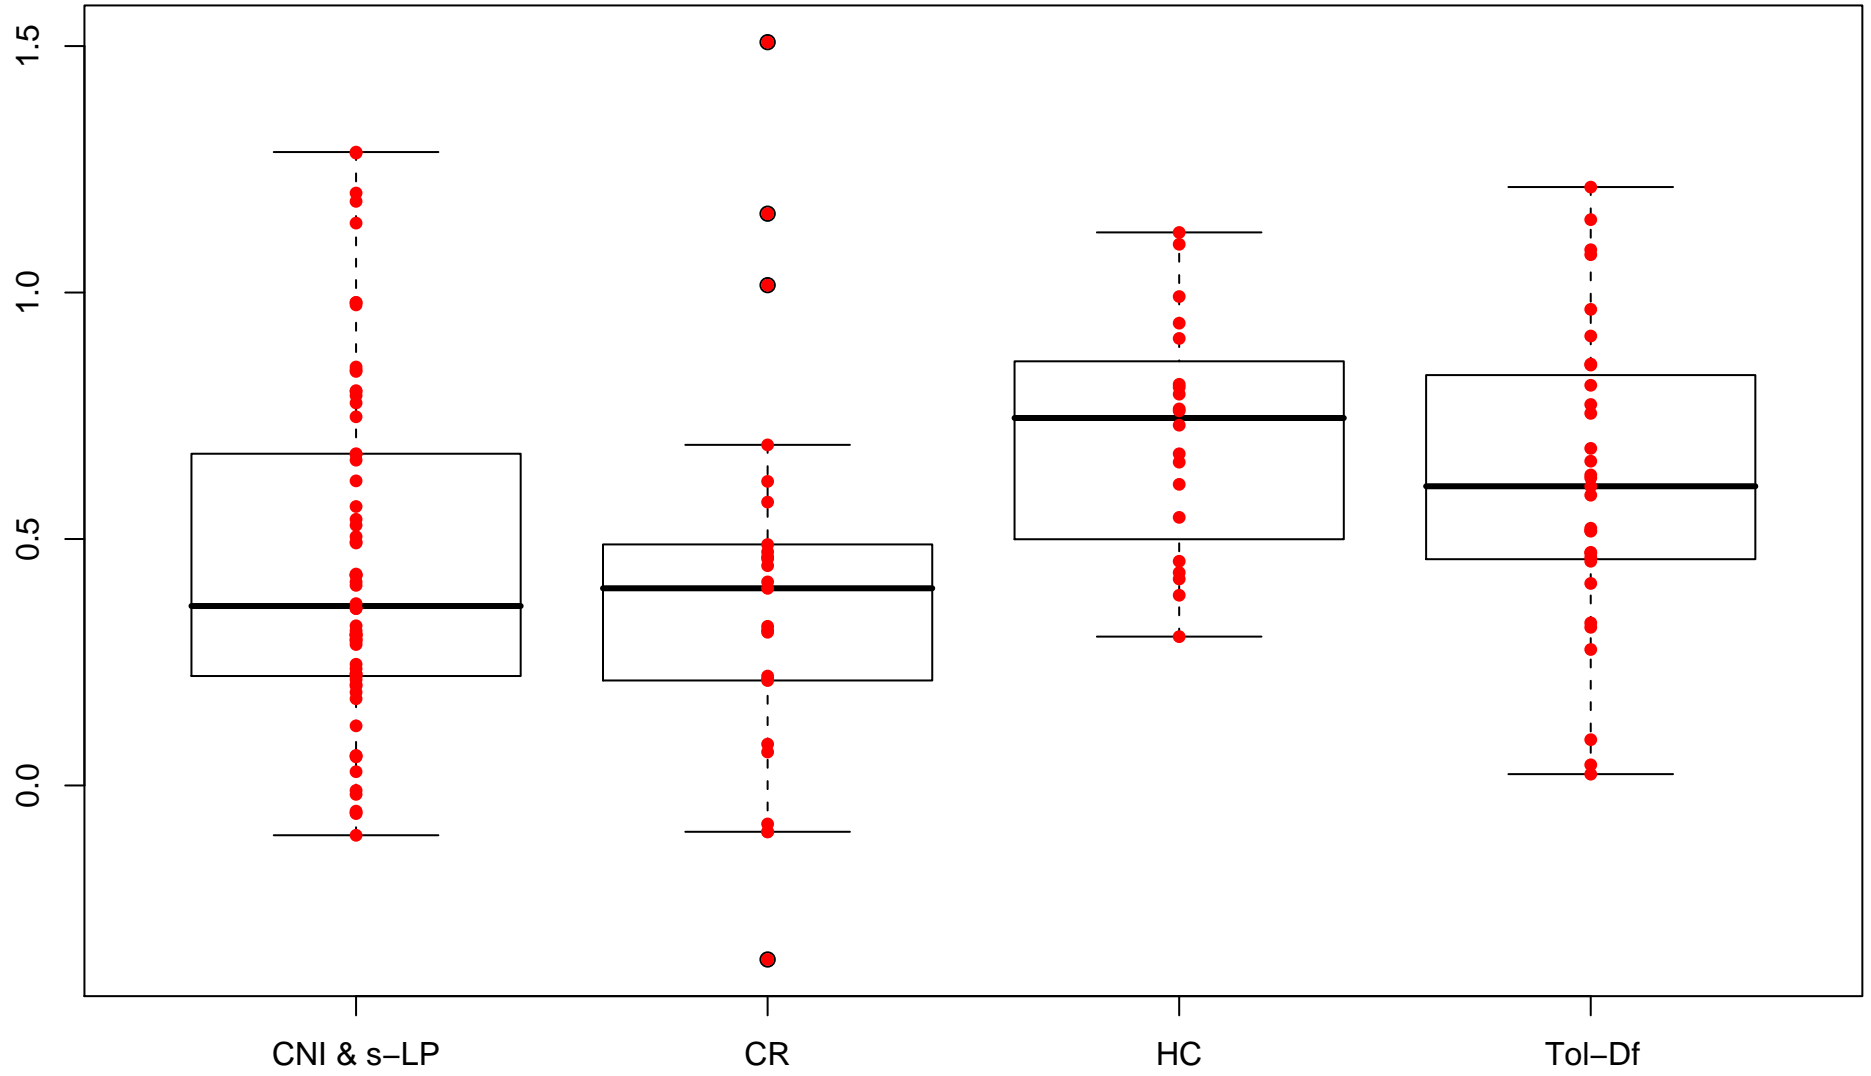

Rank 629 : NOSIP  
0.0005596

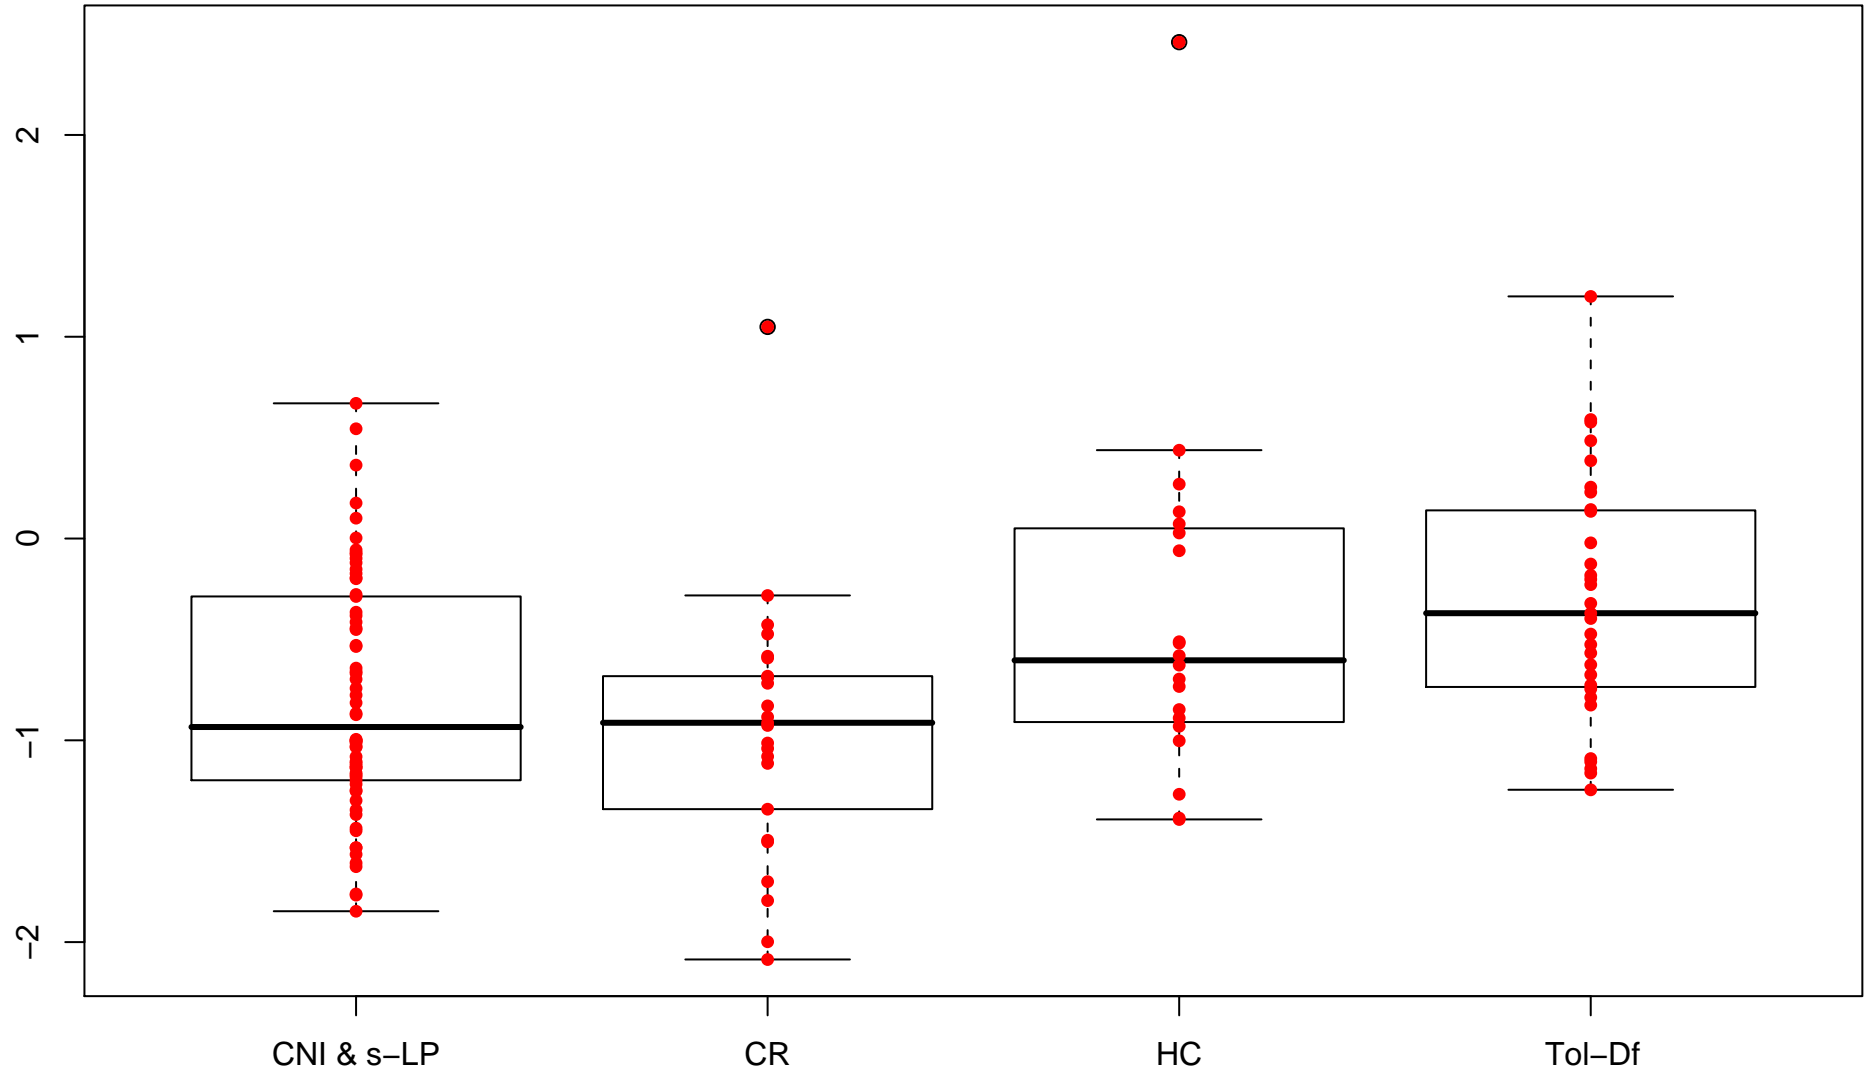

Rank 630 : BCL6  
0.0005646

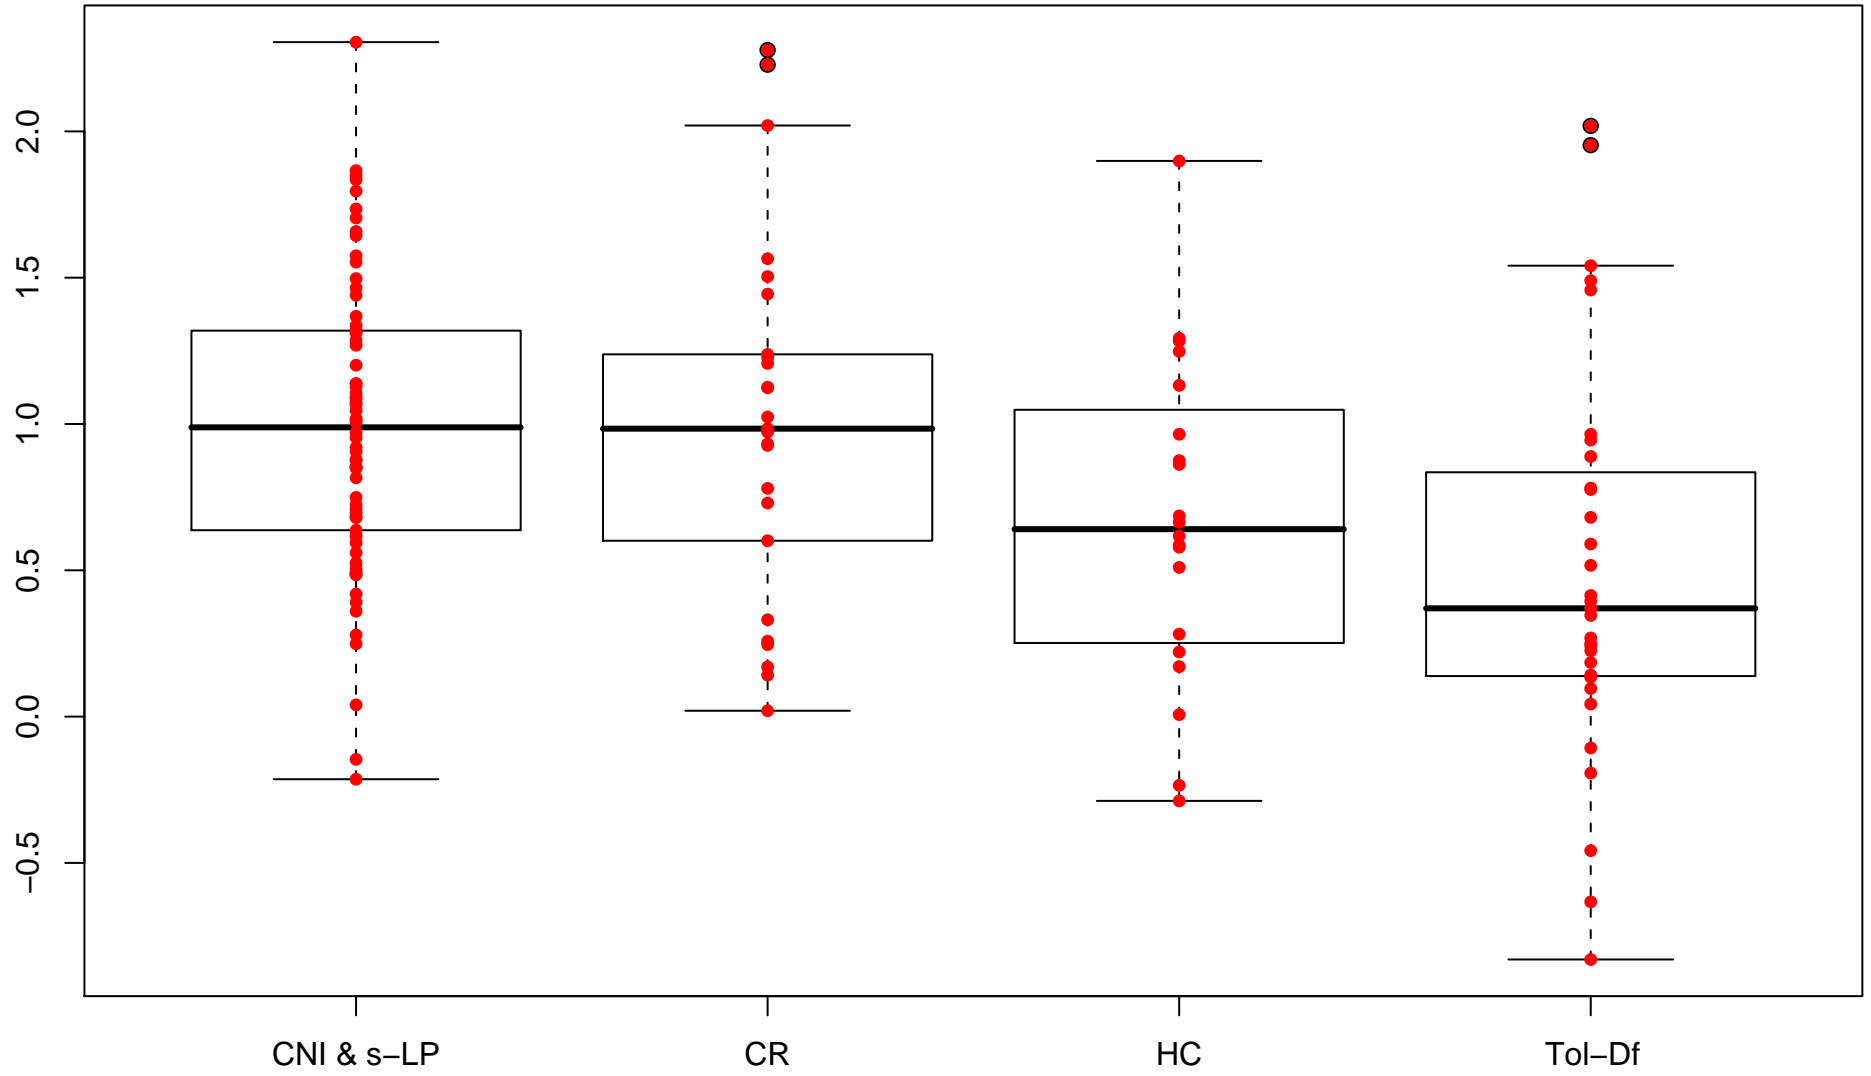

Rank 631 : LOC644538  
0.0005793

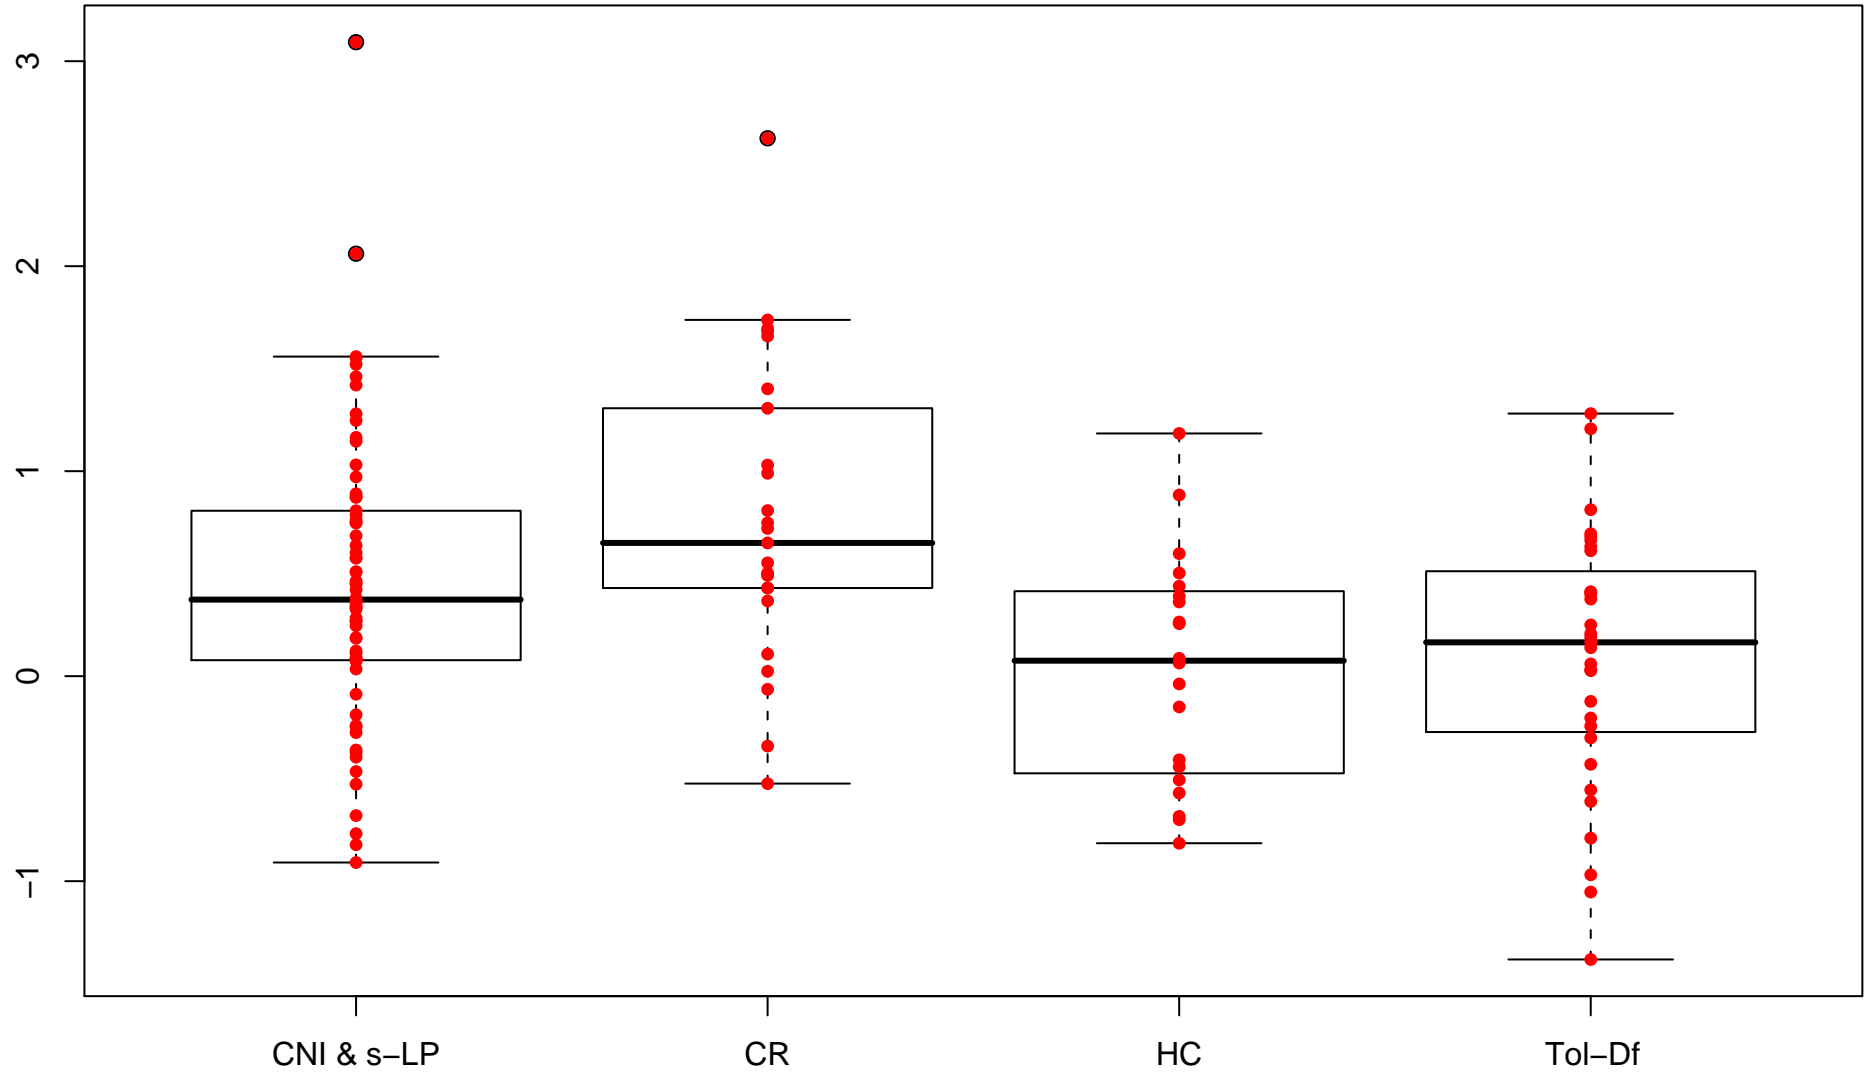



Rank 632 : NEDD9  
0.0005875

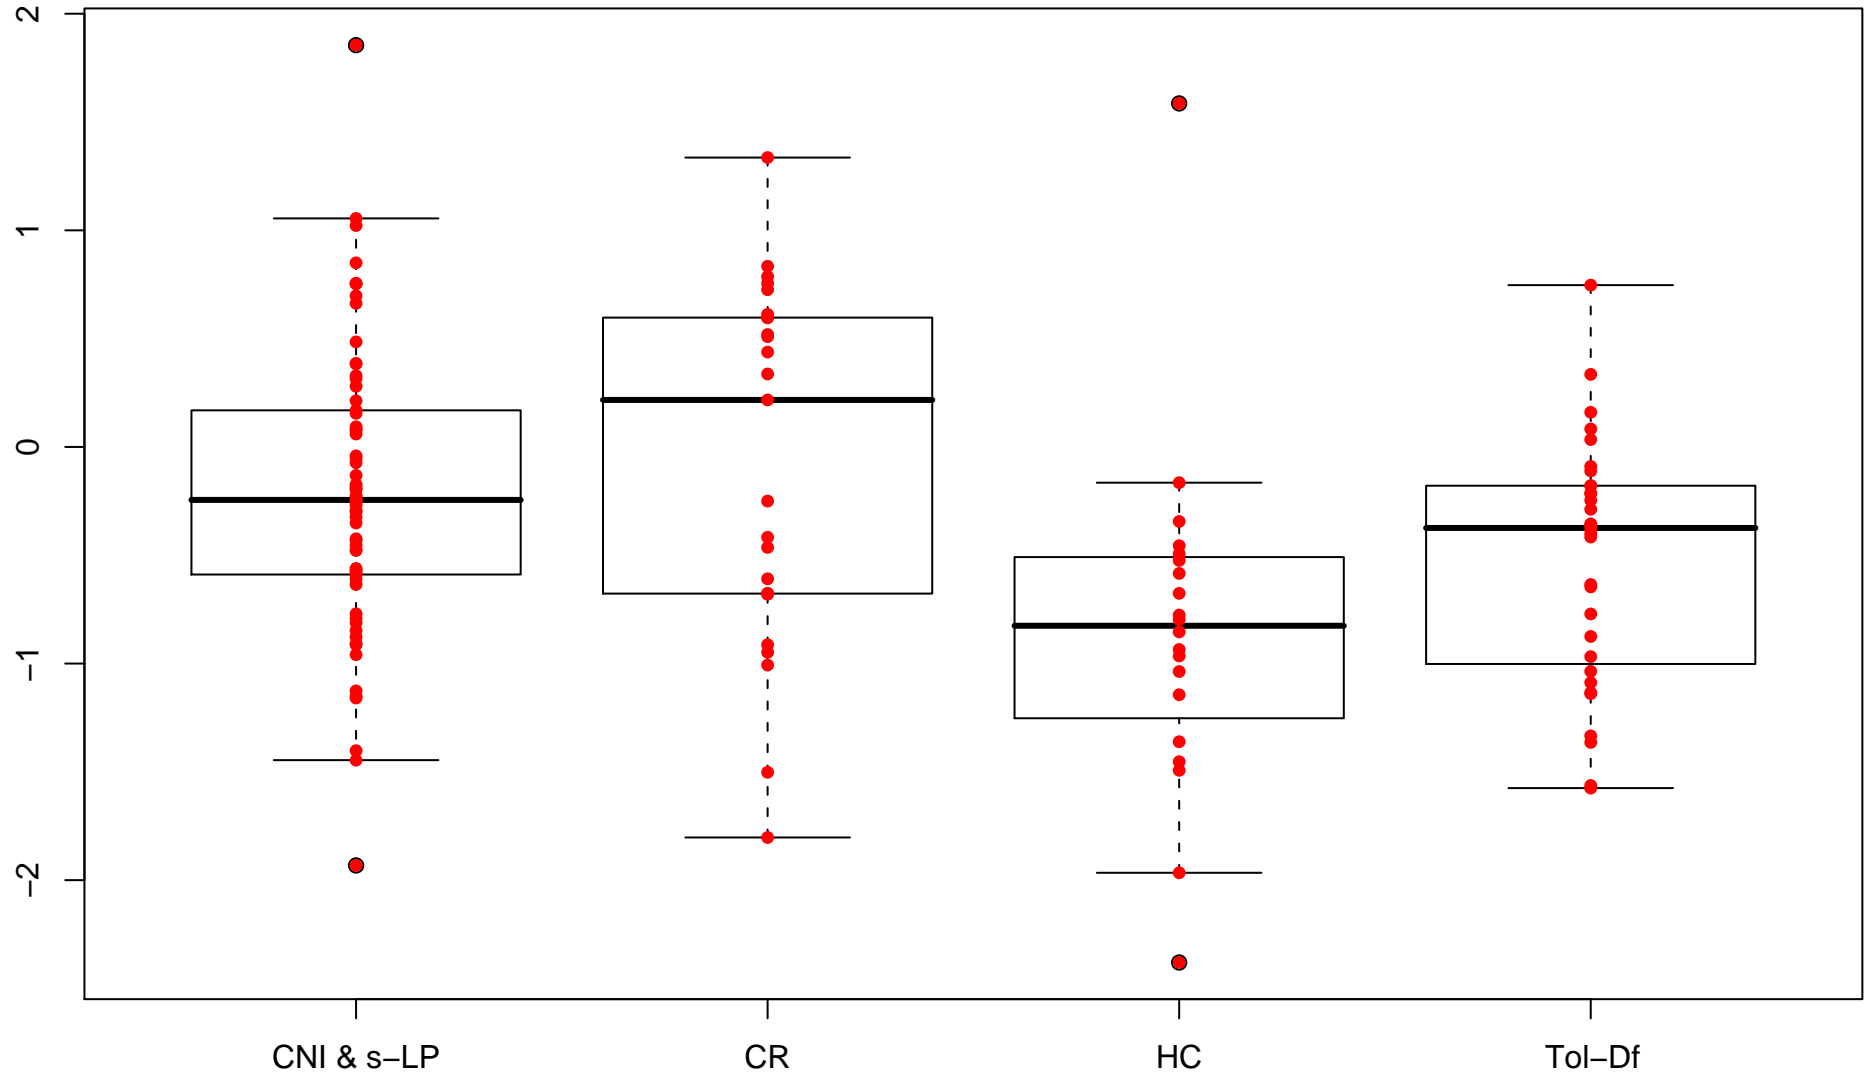

Rank 633 : UCHL5  
0.0005981

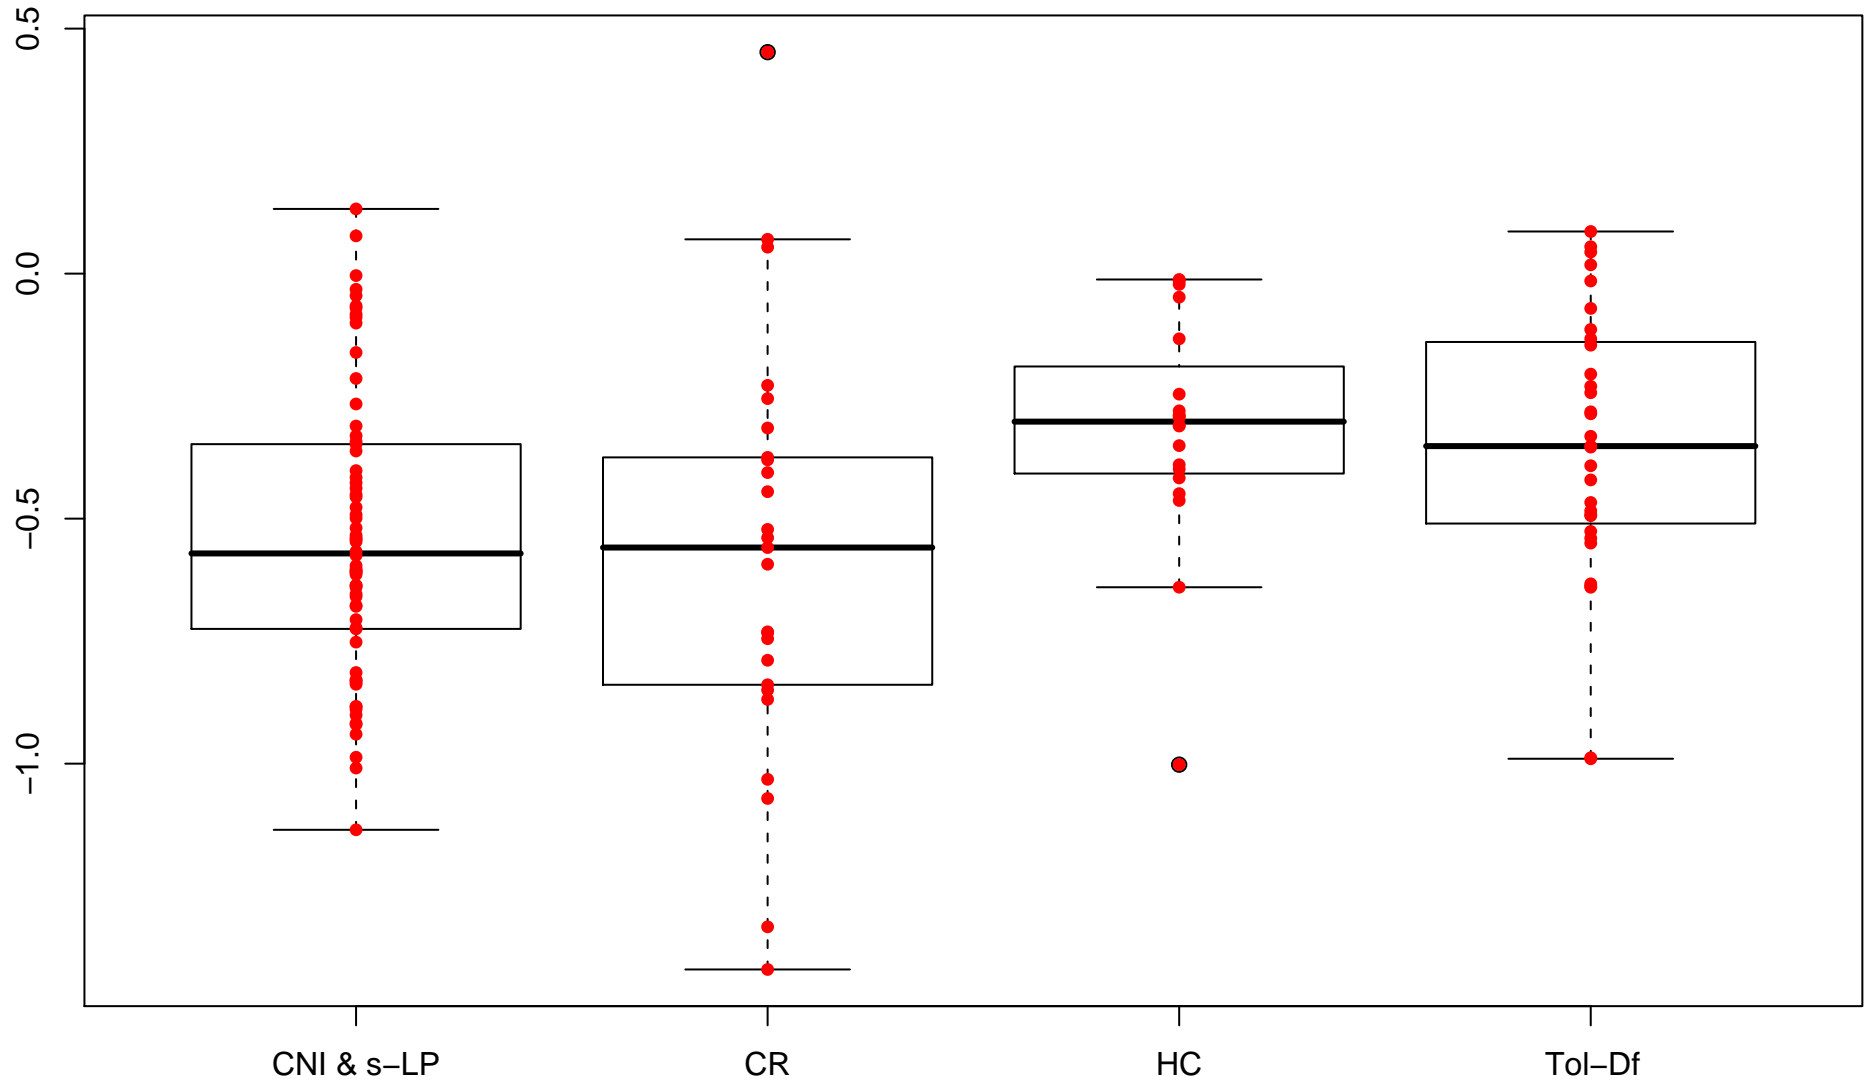

Rank 634 : LOC390306  
0.0006008

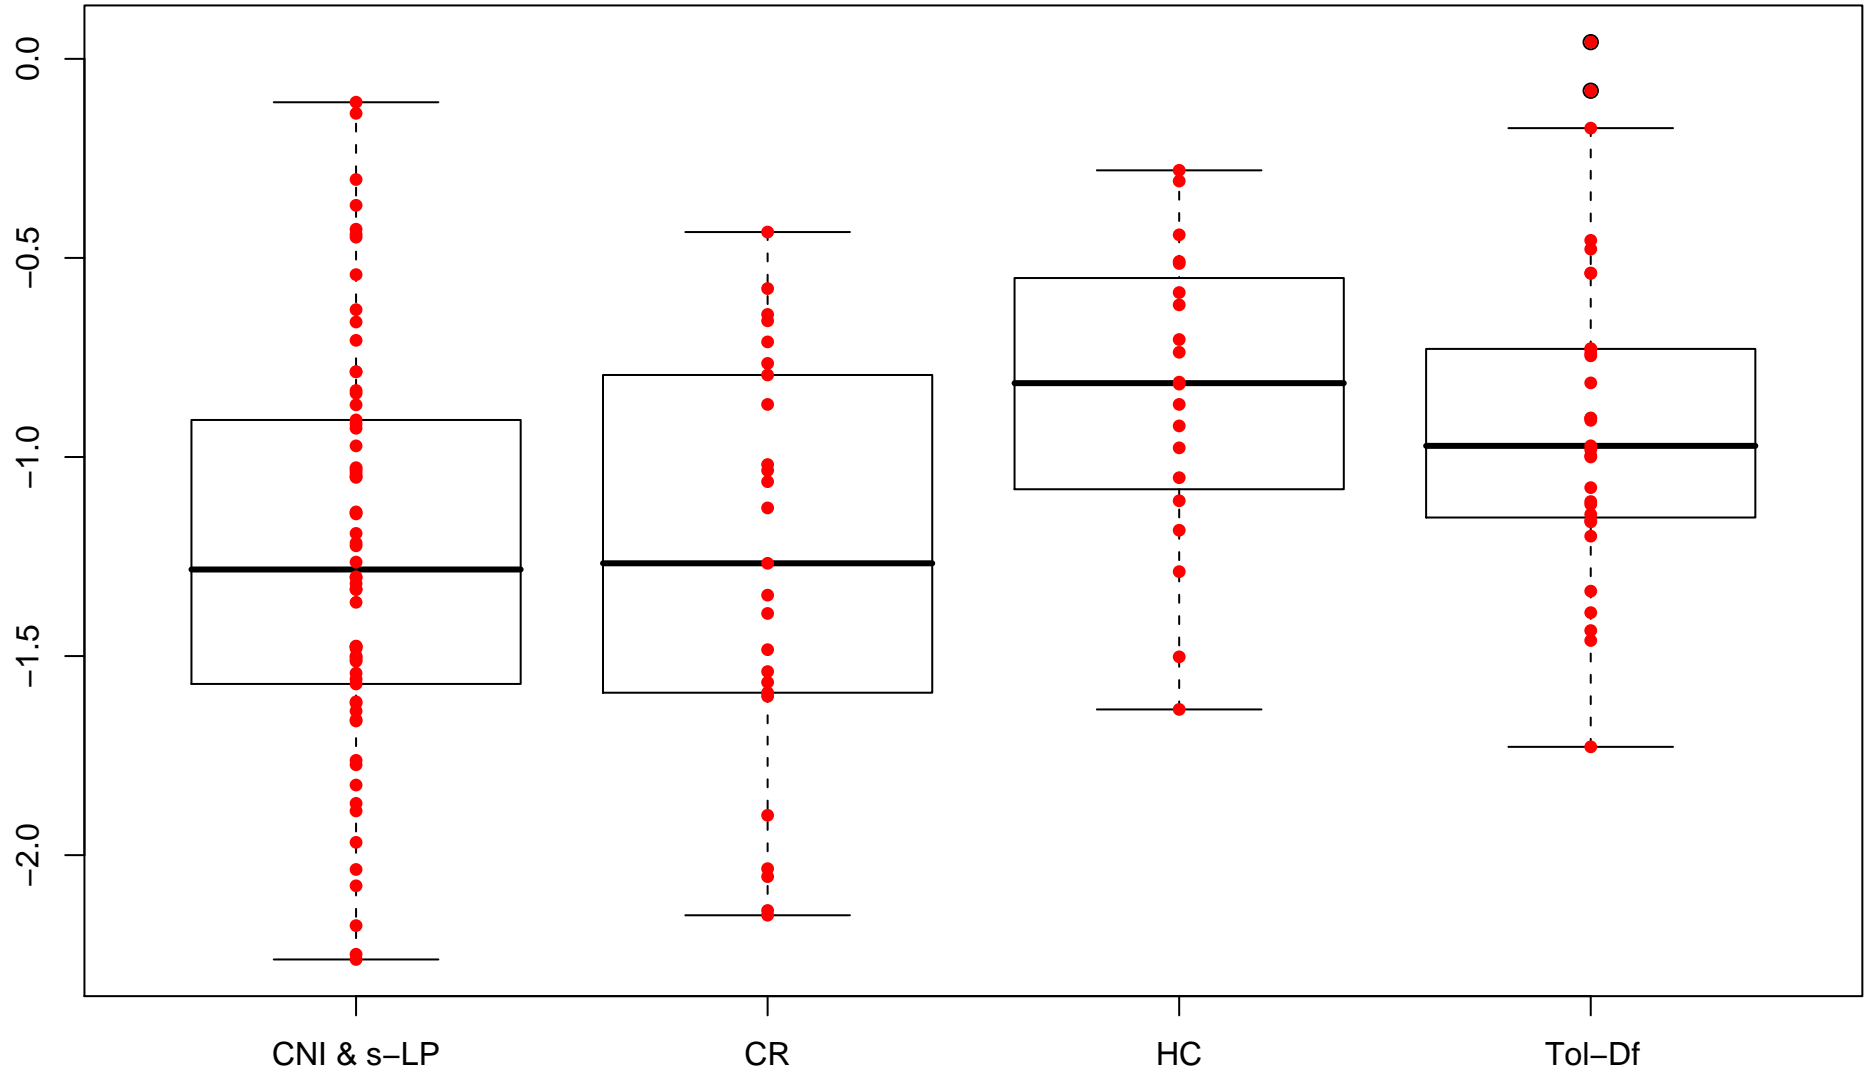

Rank 635 : BCKDHB  
0.0006029

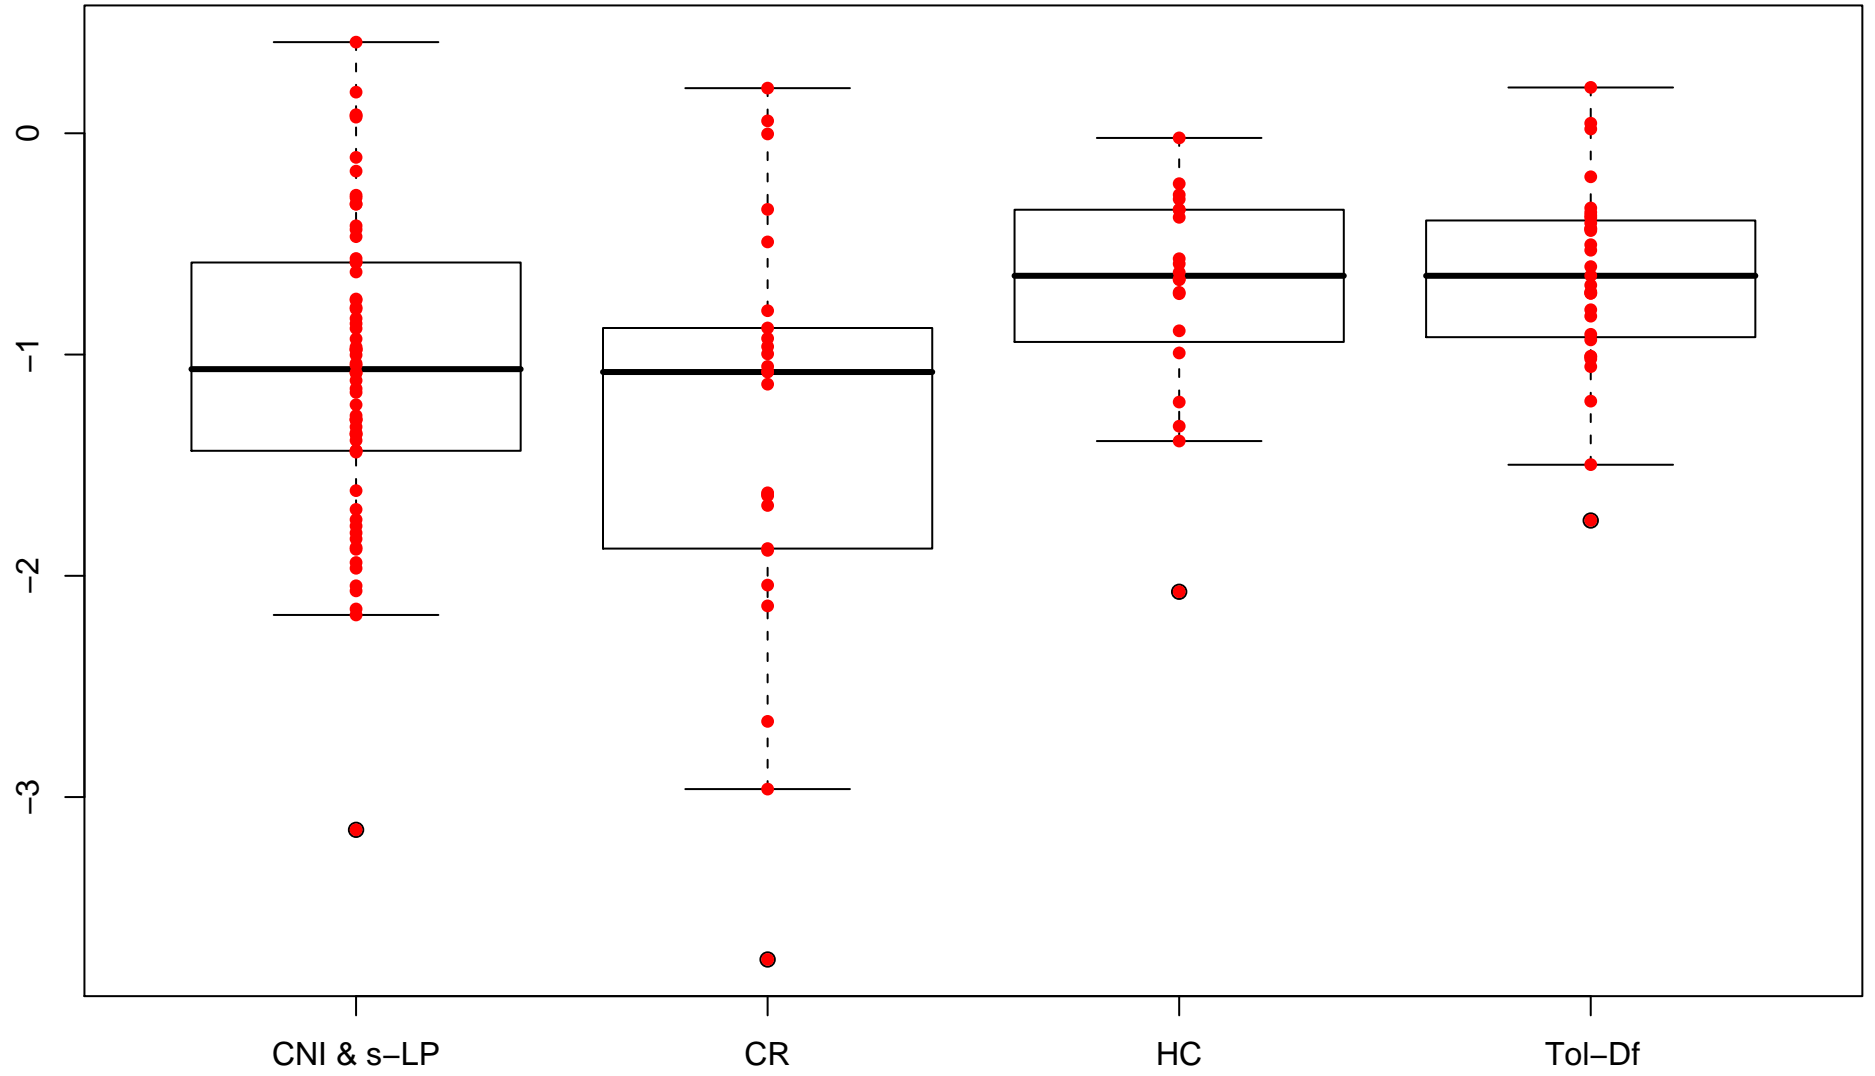

Rank 636 : NUDT16  
0.0006073

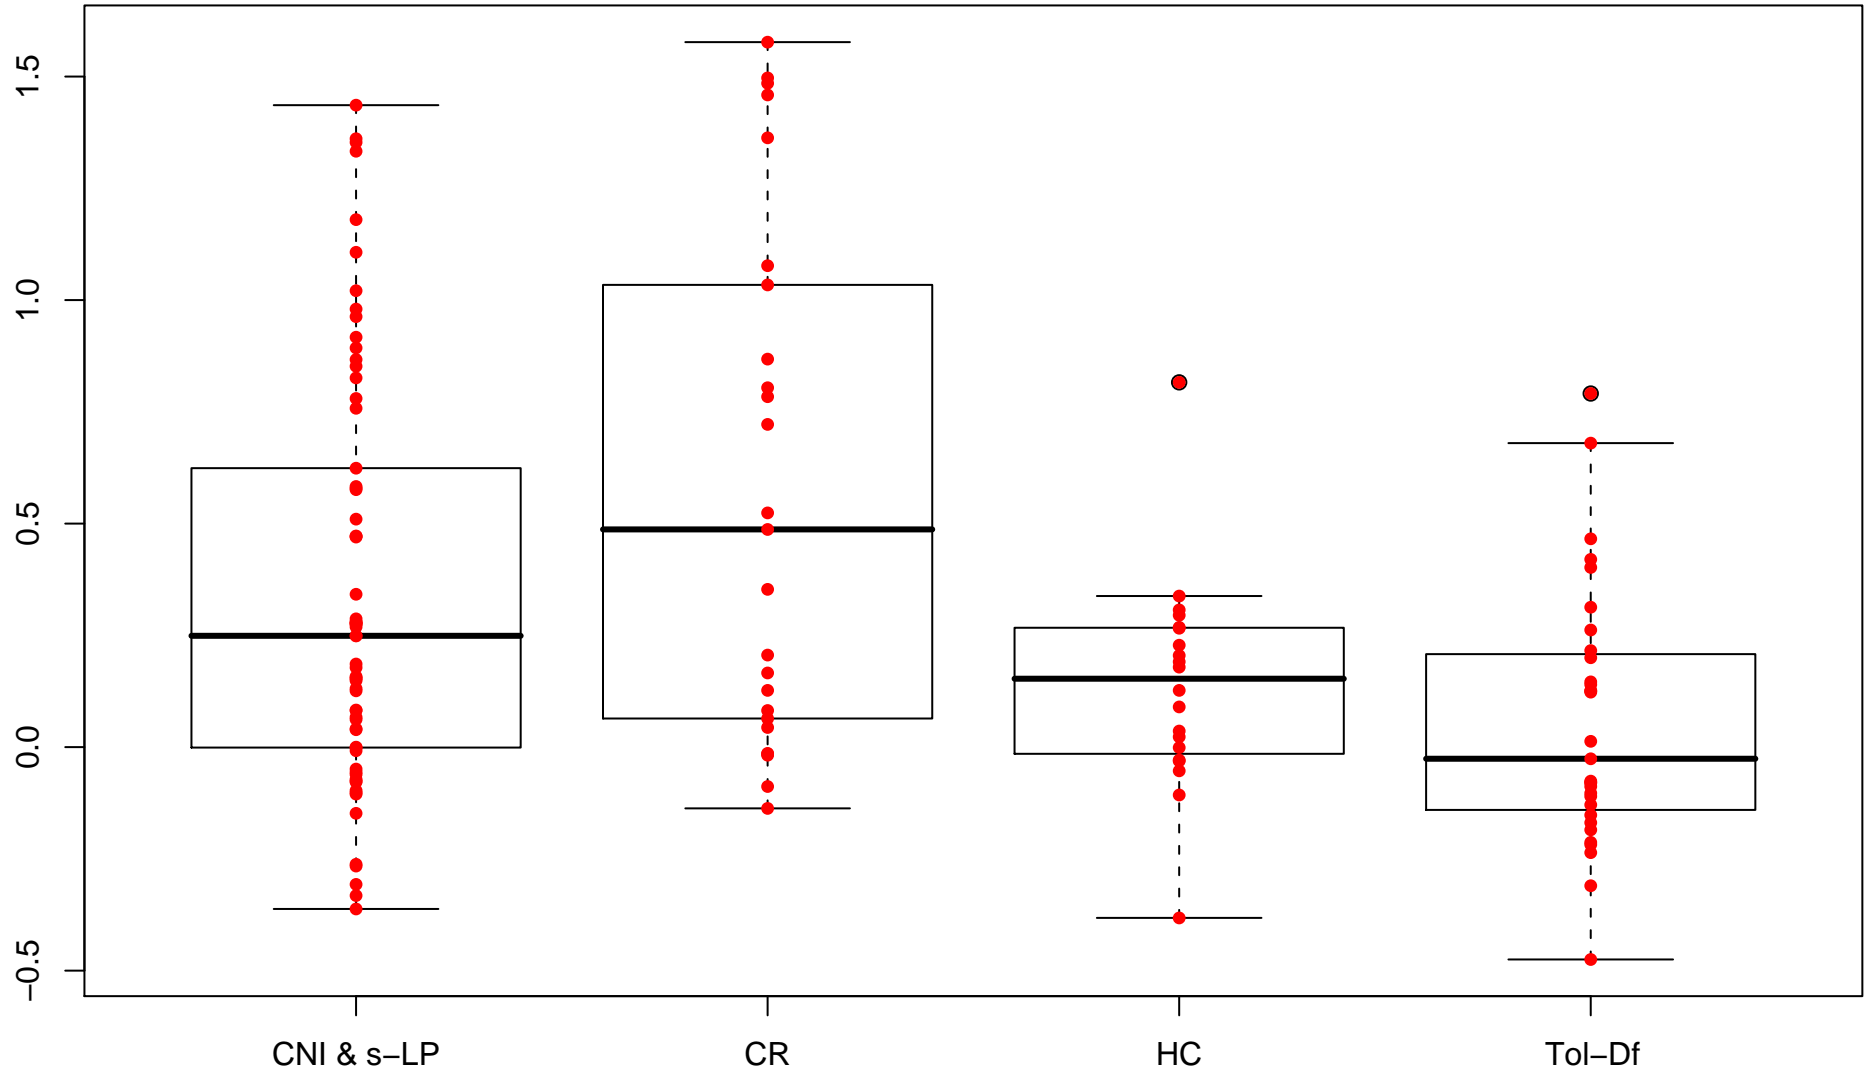

Rank 637 : CD163  
0.0006098

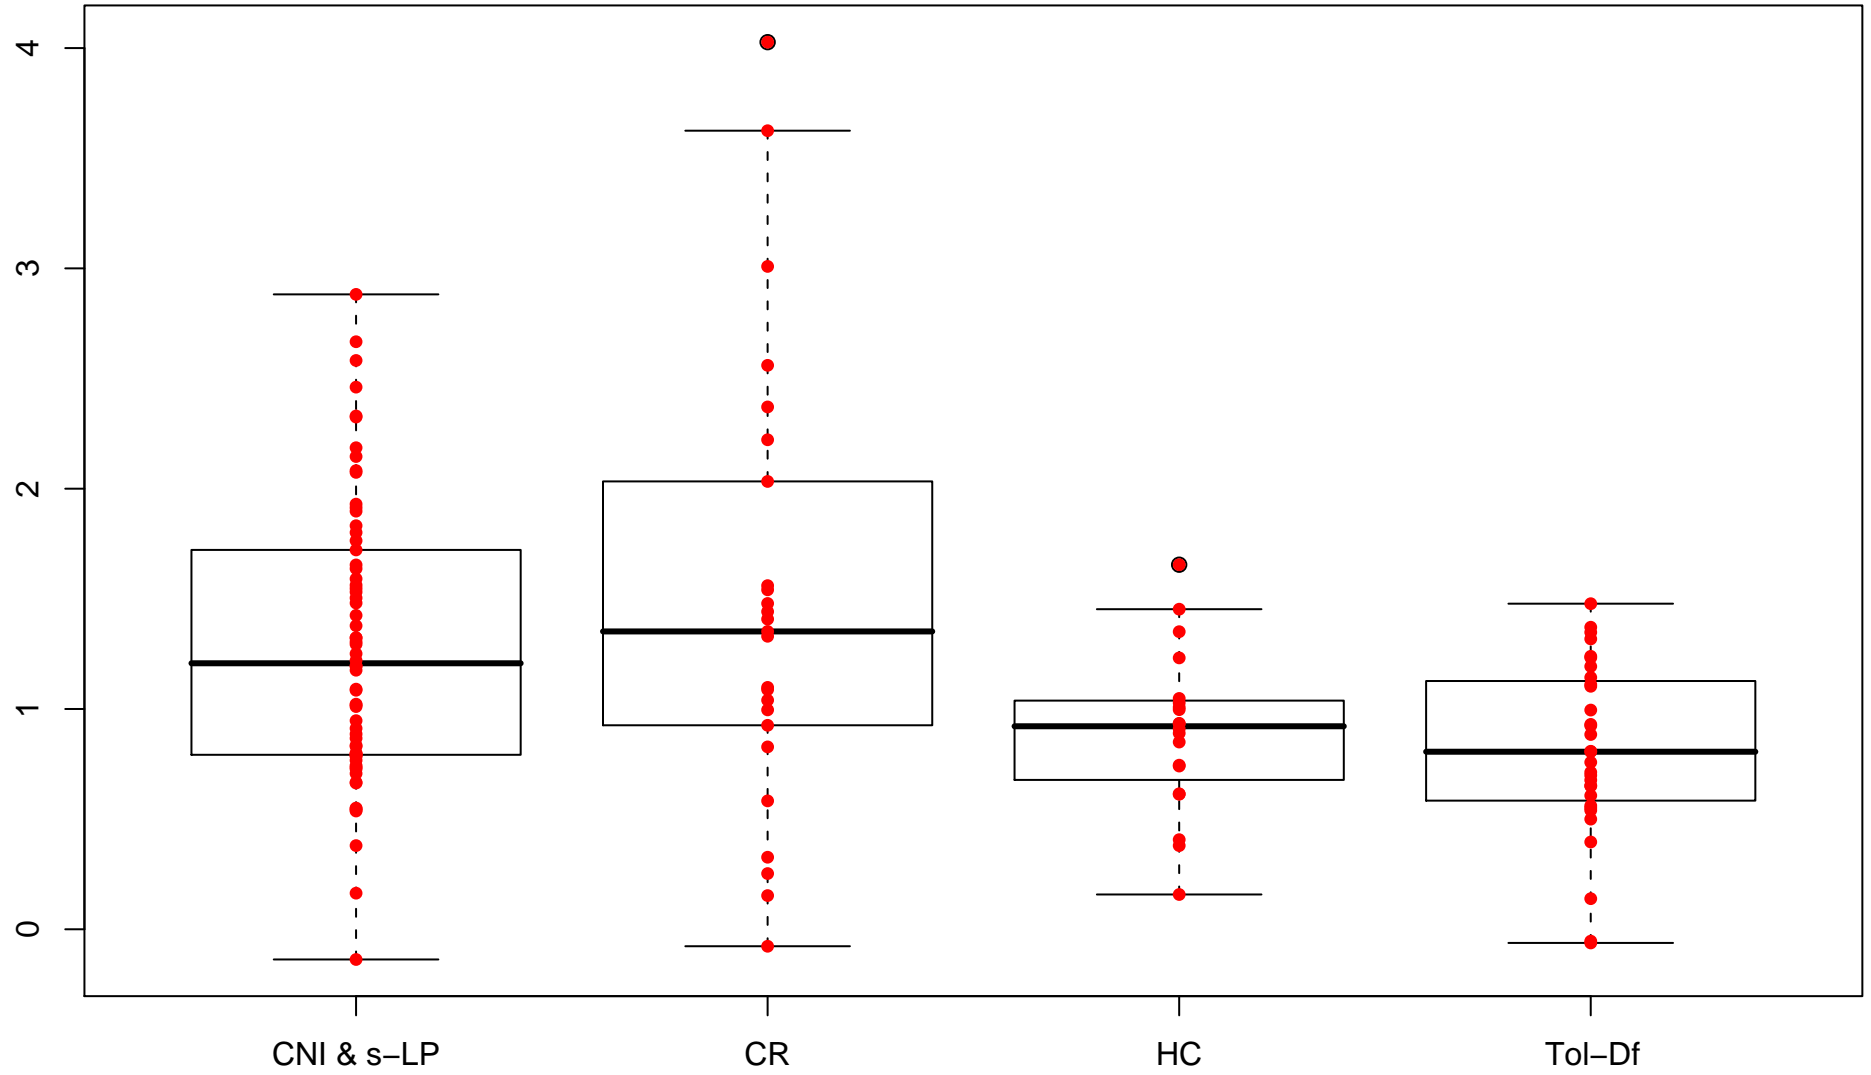

Rank 638 : DNAJC19  
0.0006116

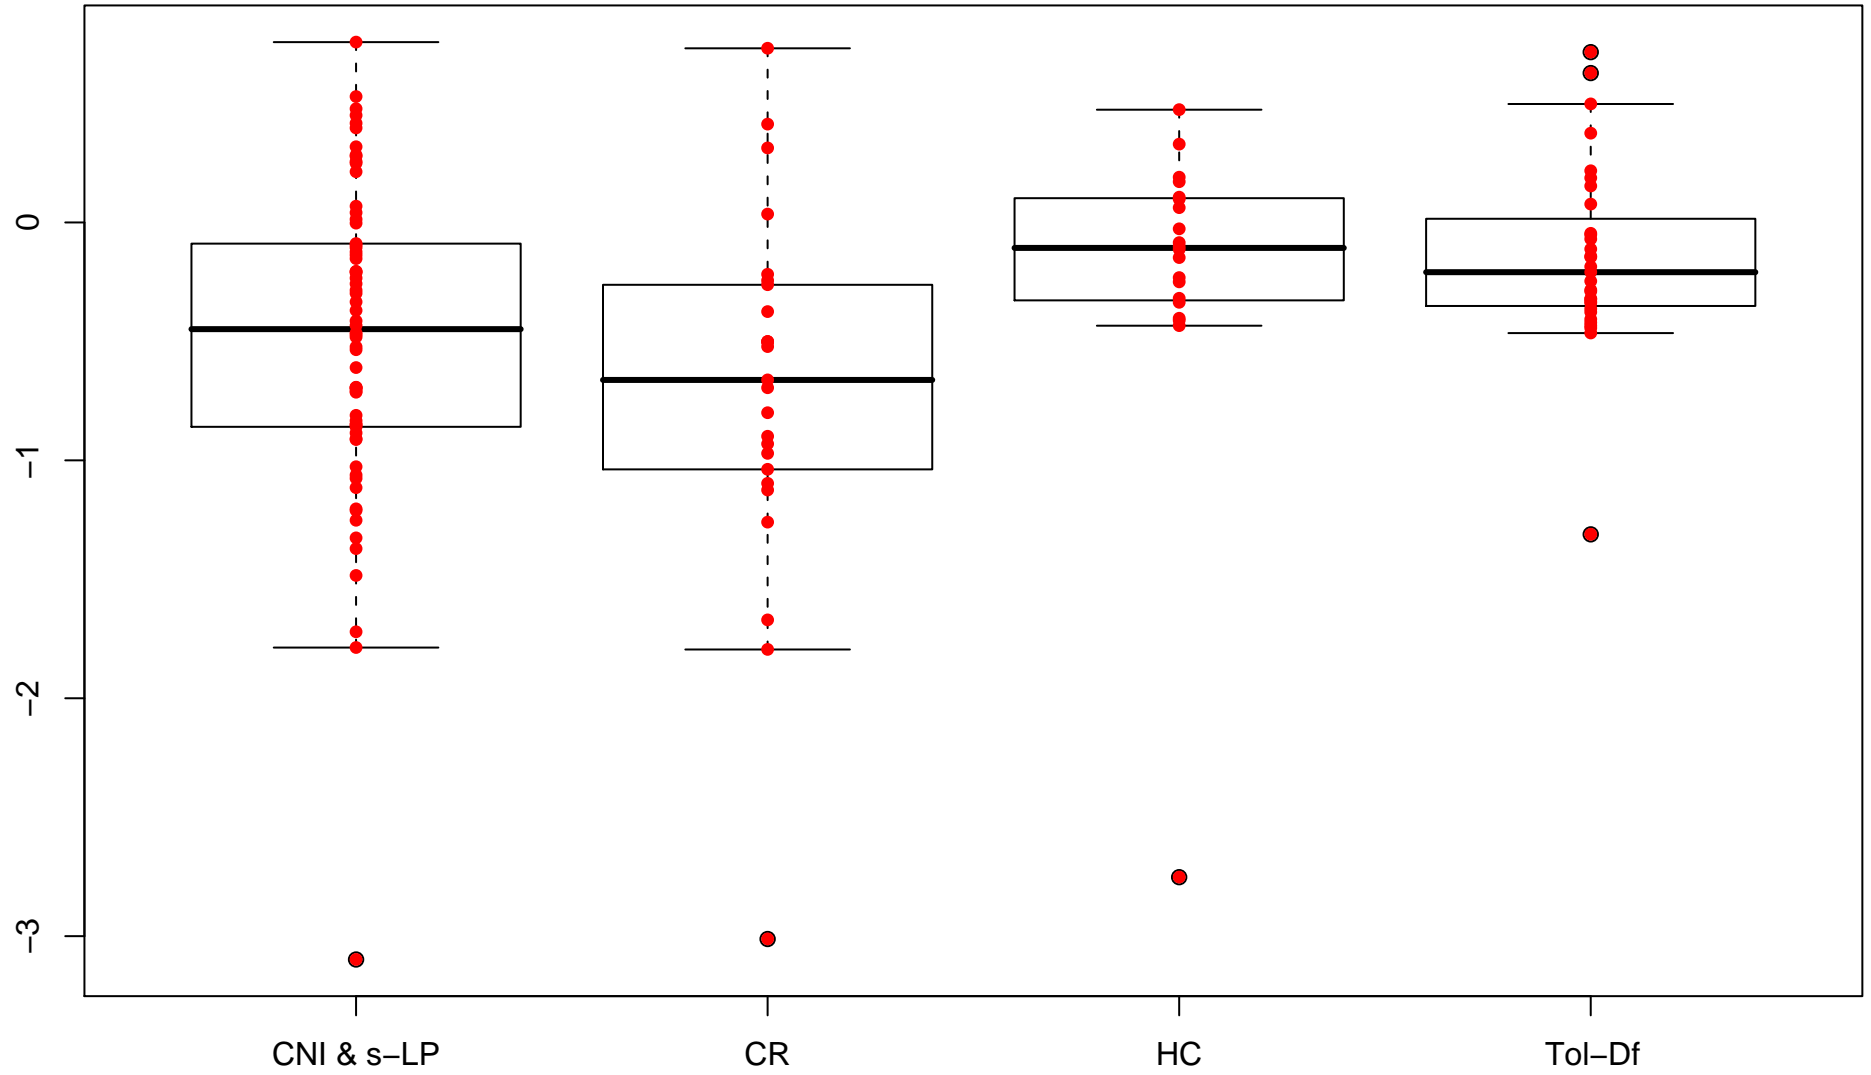

Rank 639 : ADH1A  
0.0006152

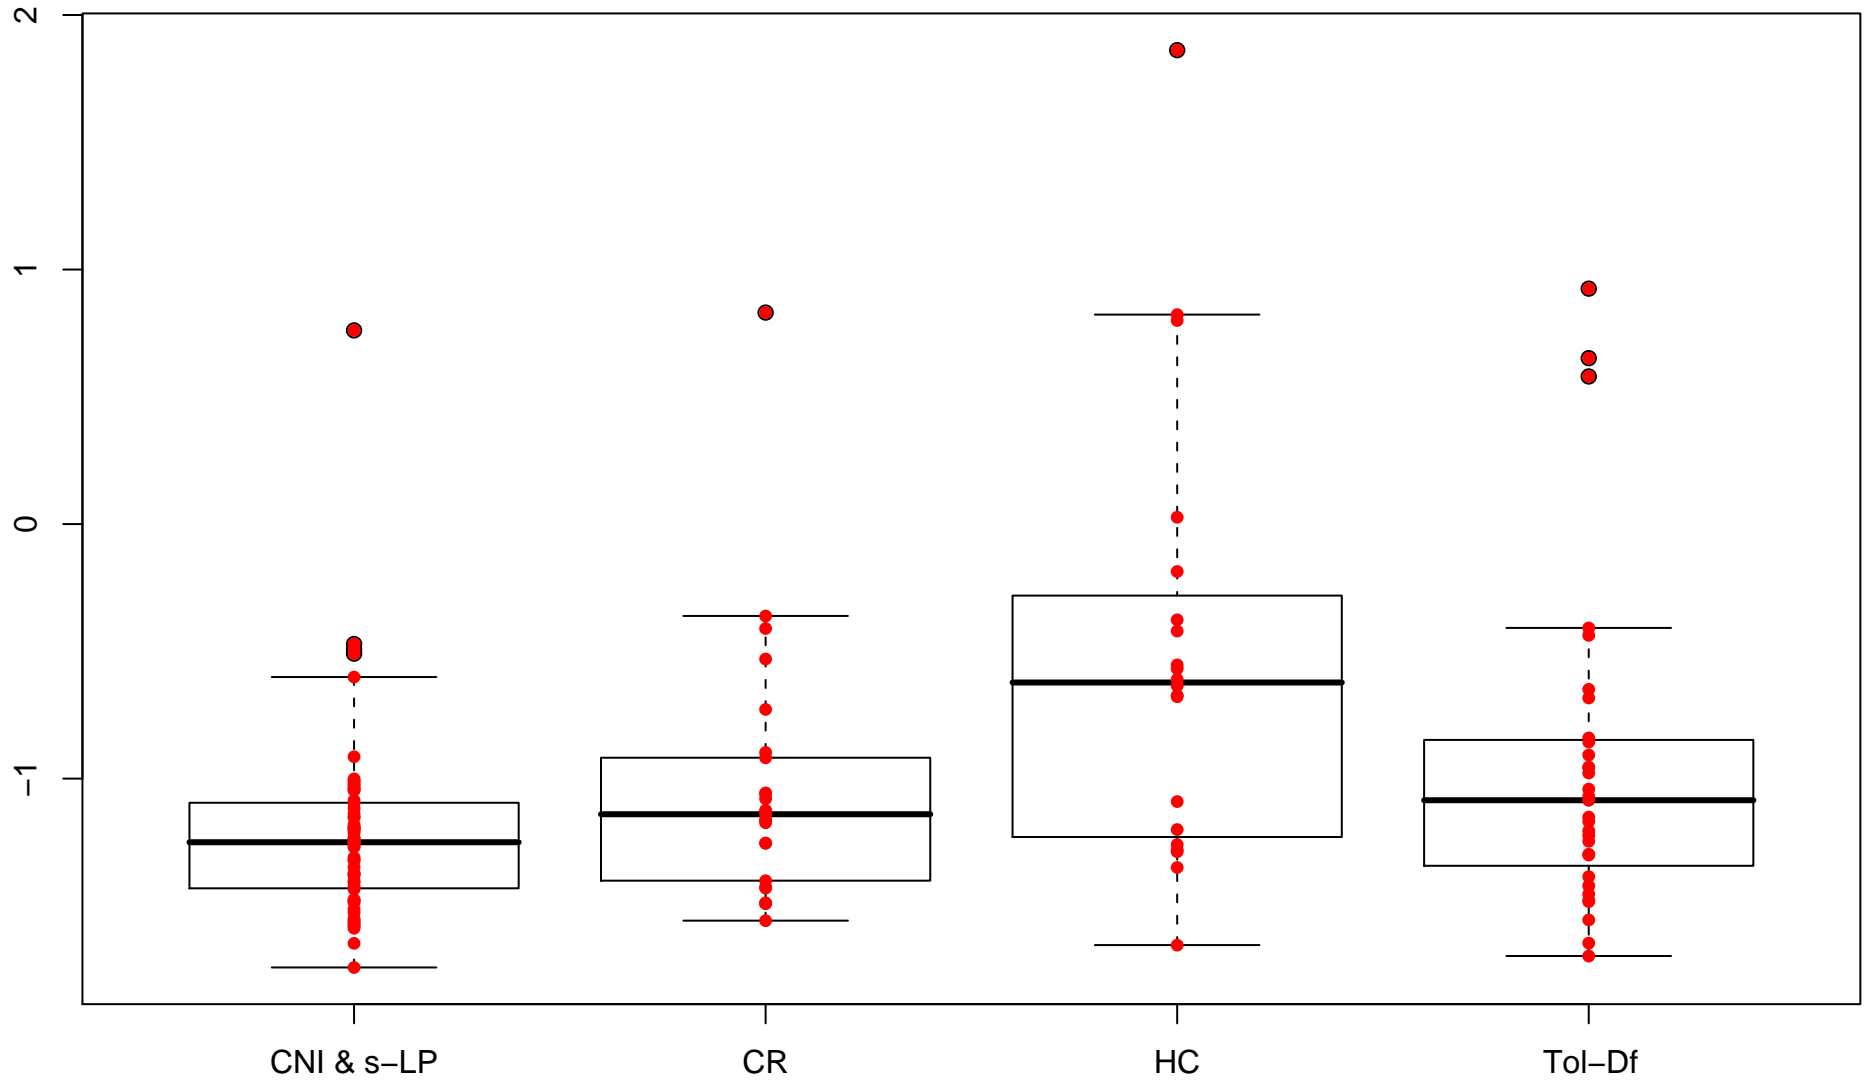



Rank 640 : DNAJC16  
0.0006178

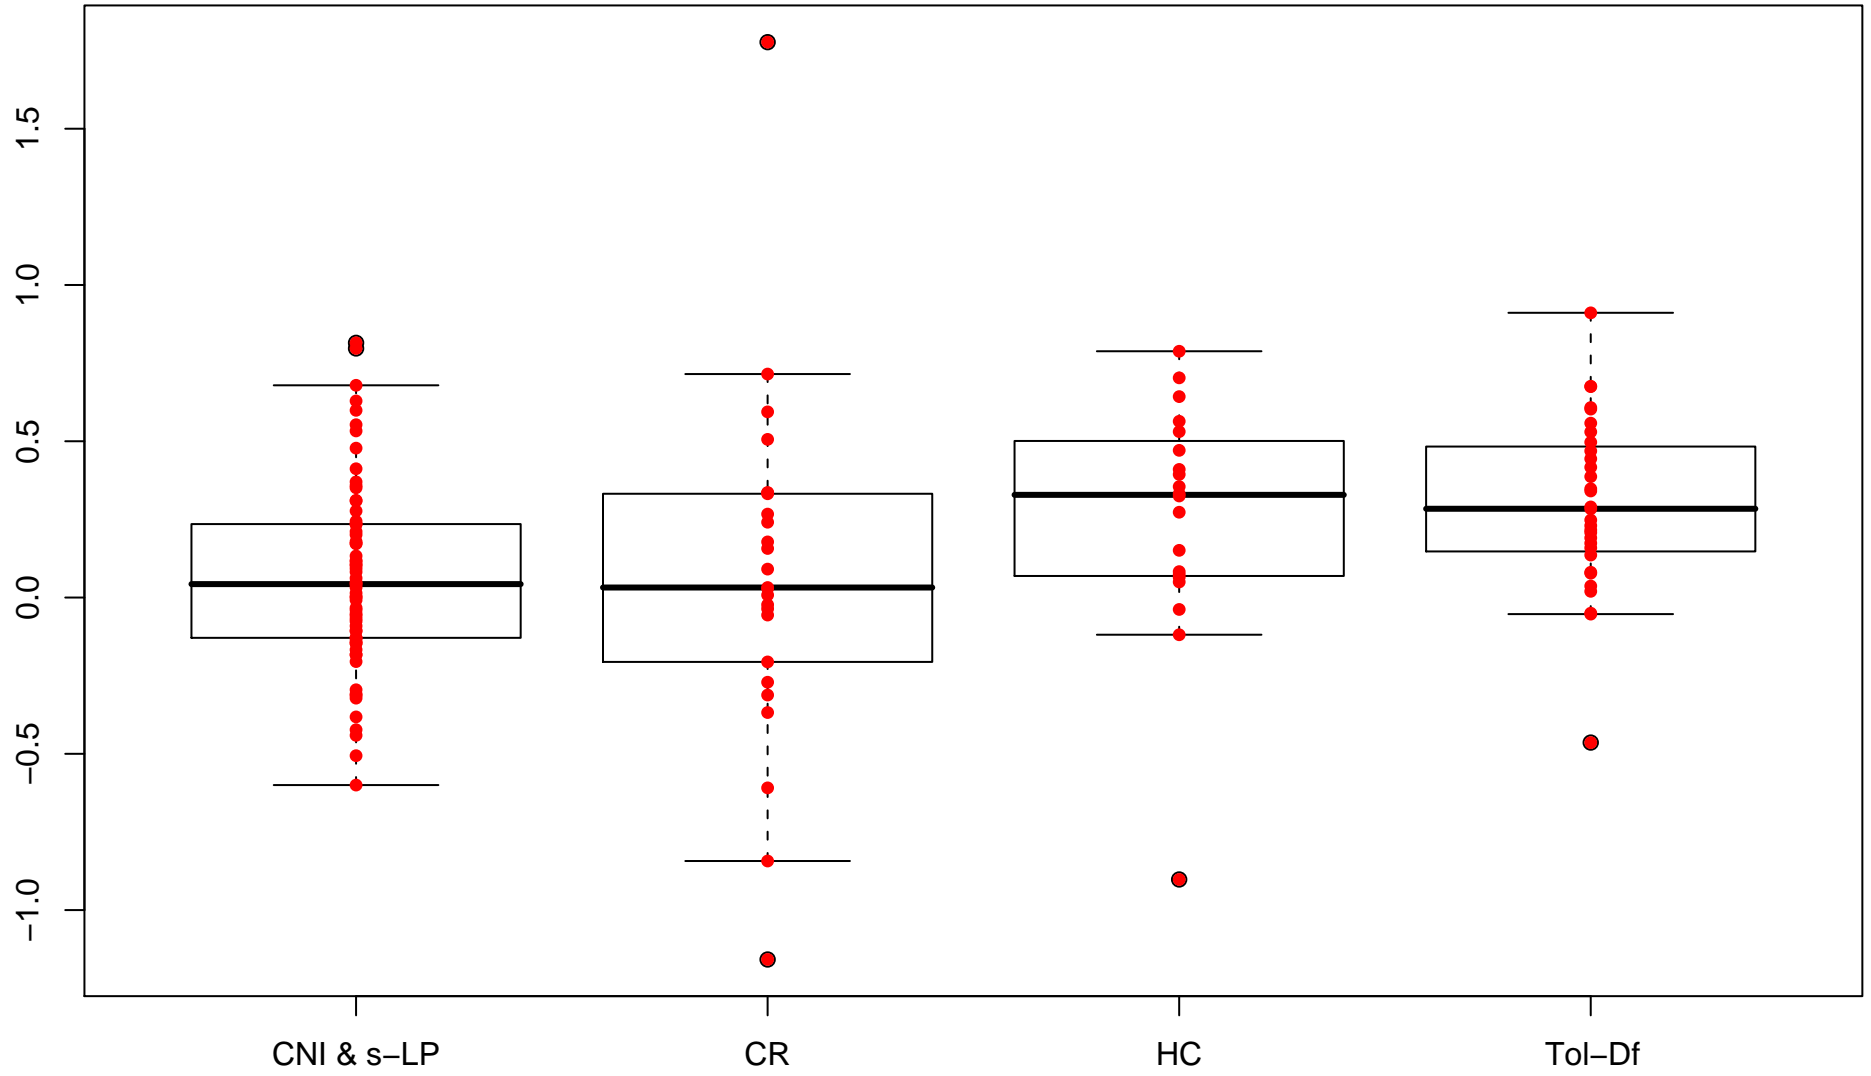

Rank 641 : CXCR3  
0.0006218

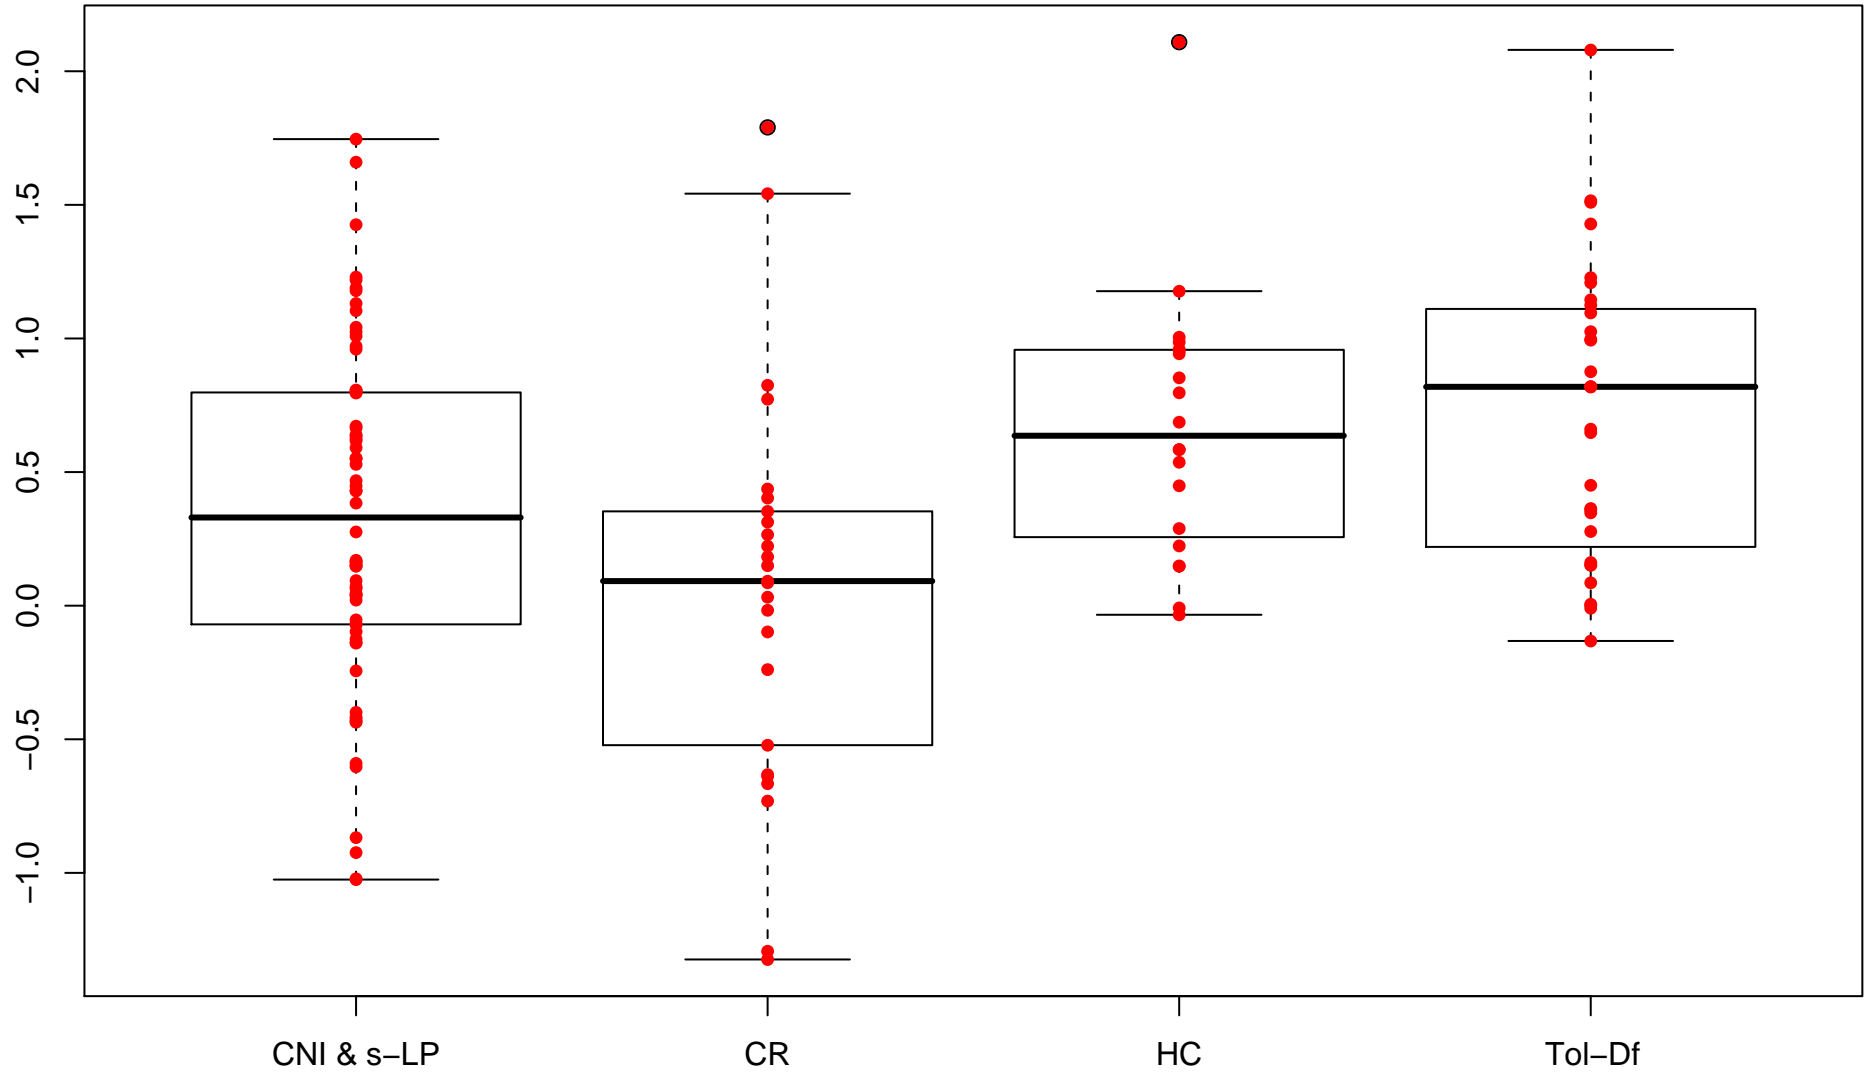

Rank 642 : PIN4  
0.0006242

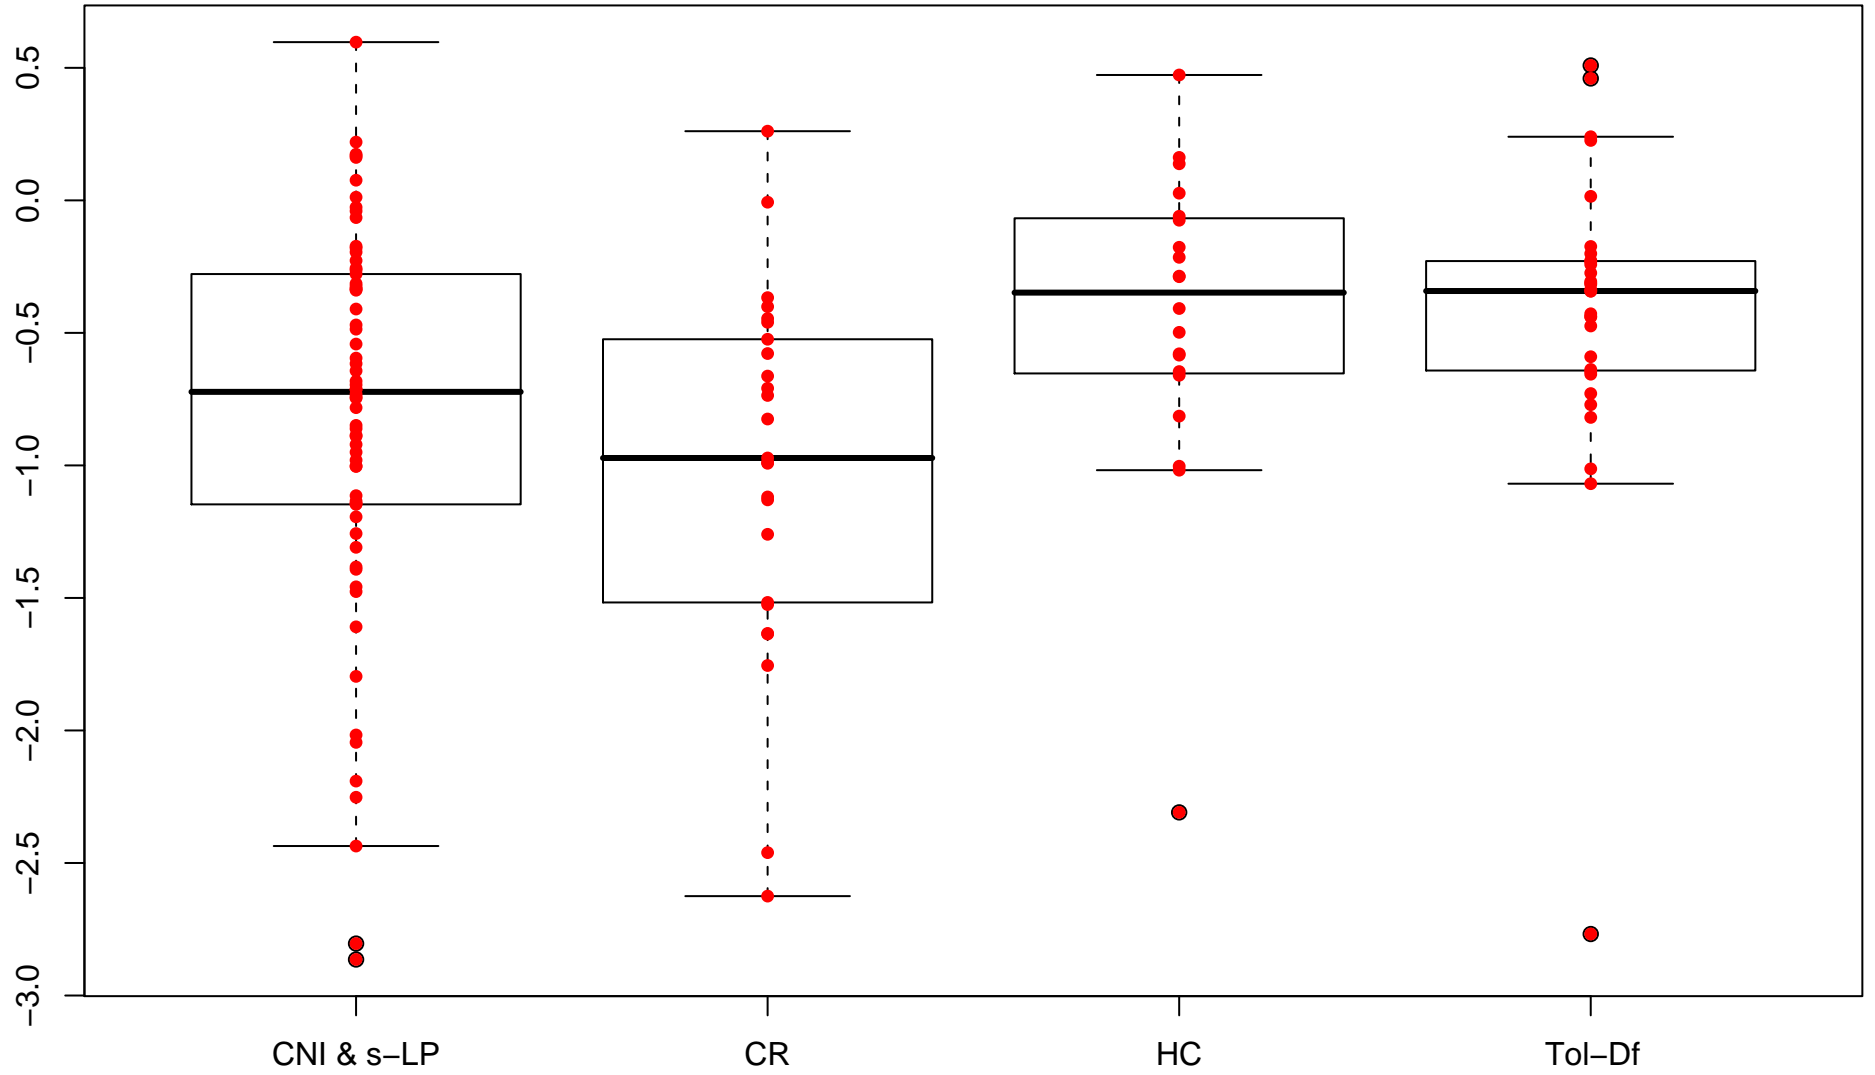

Rank 643 : ATP6V1G1  
0.0006287

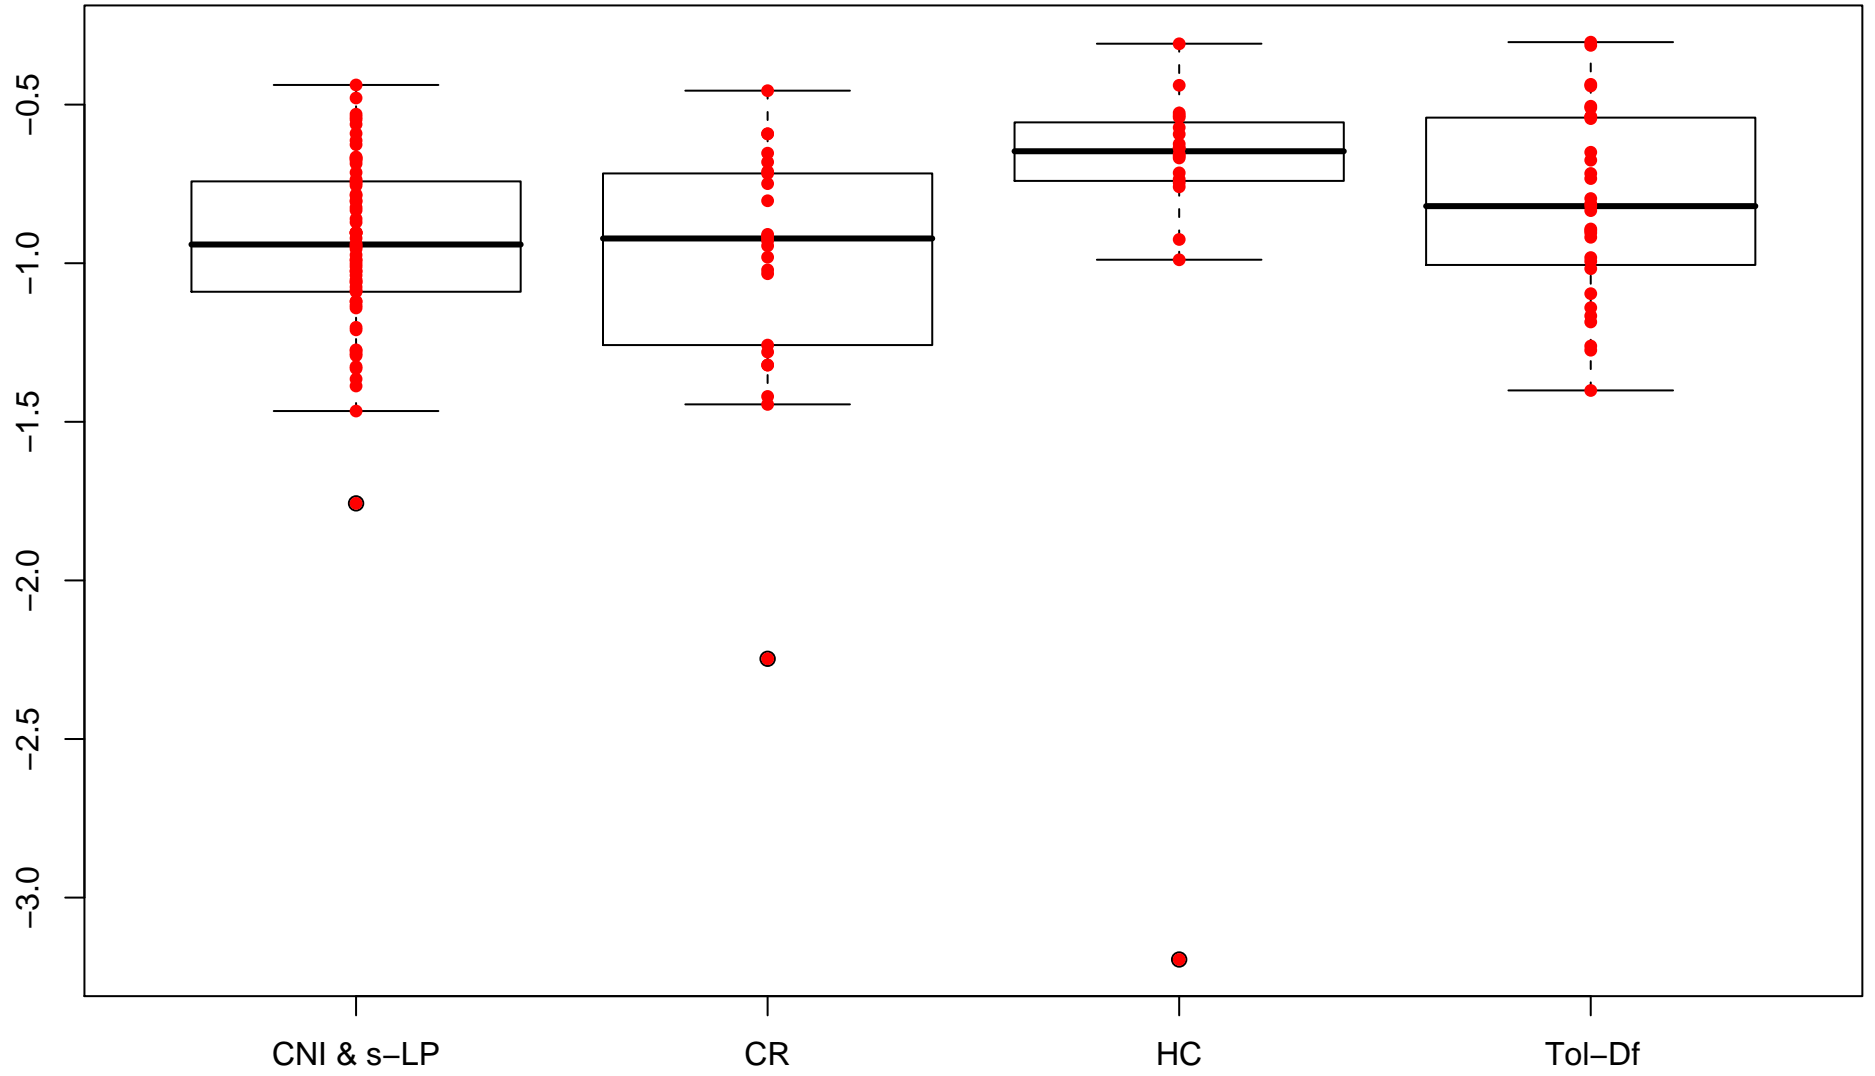

Rank 644 : M-RIP  
0.0006324

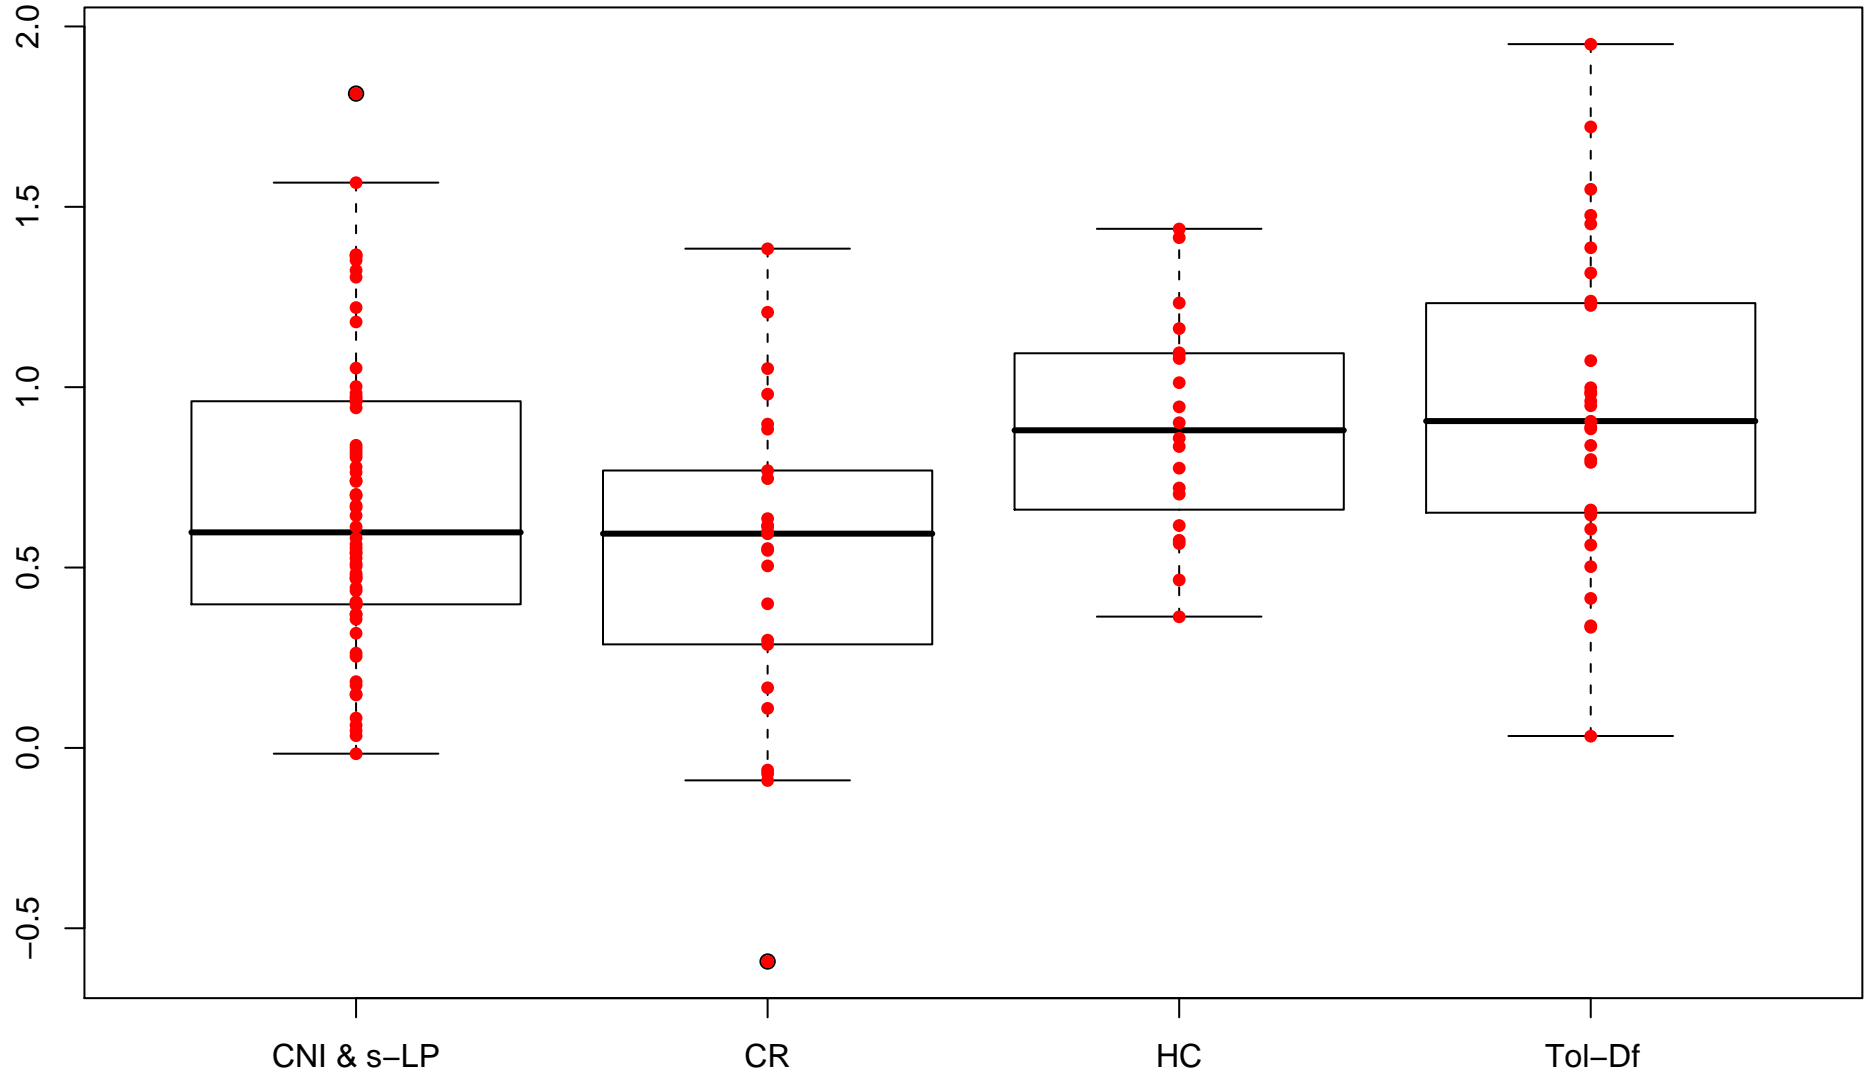

Rank 645 : PRKAB2  
0.000633

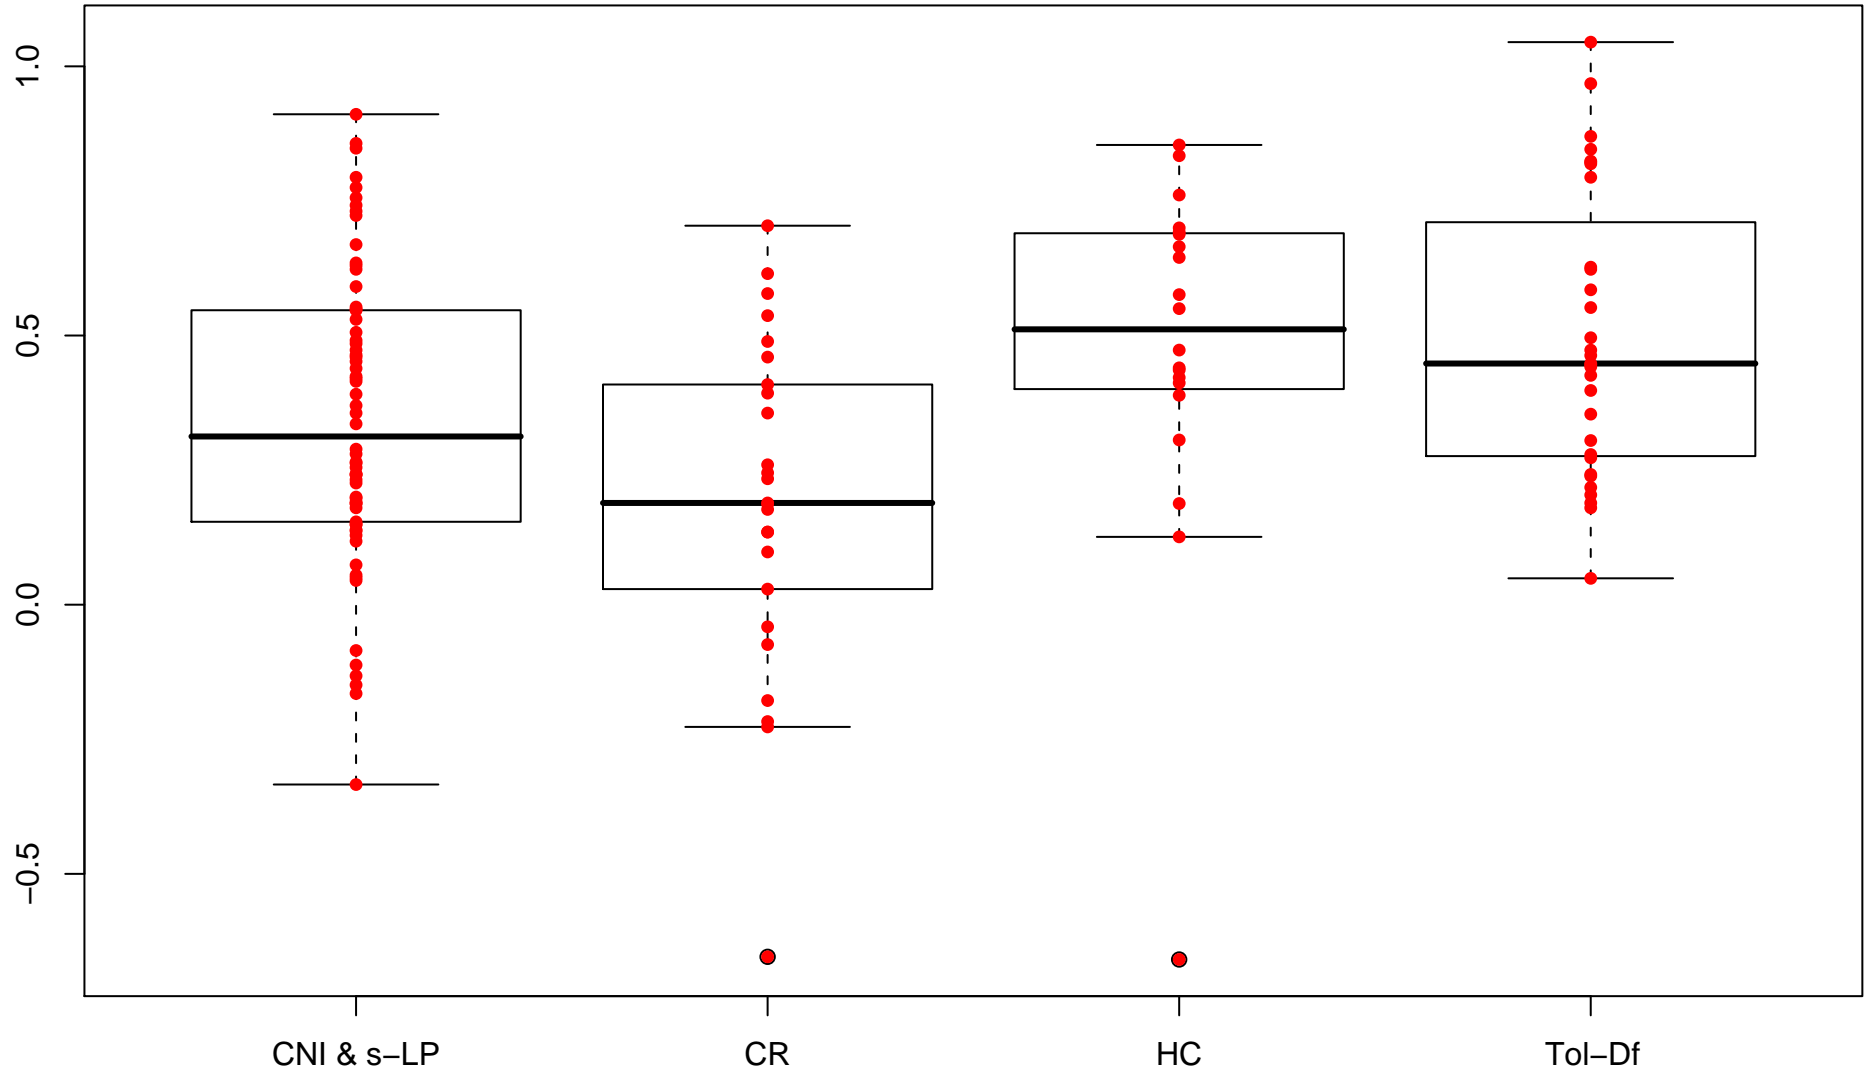

Rank 646 : PPAP2A  
0.0006572

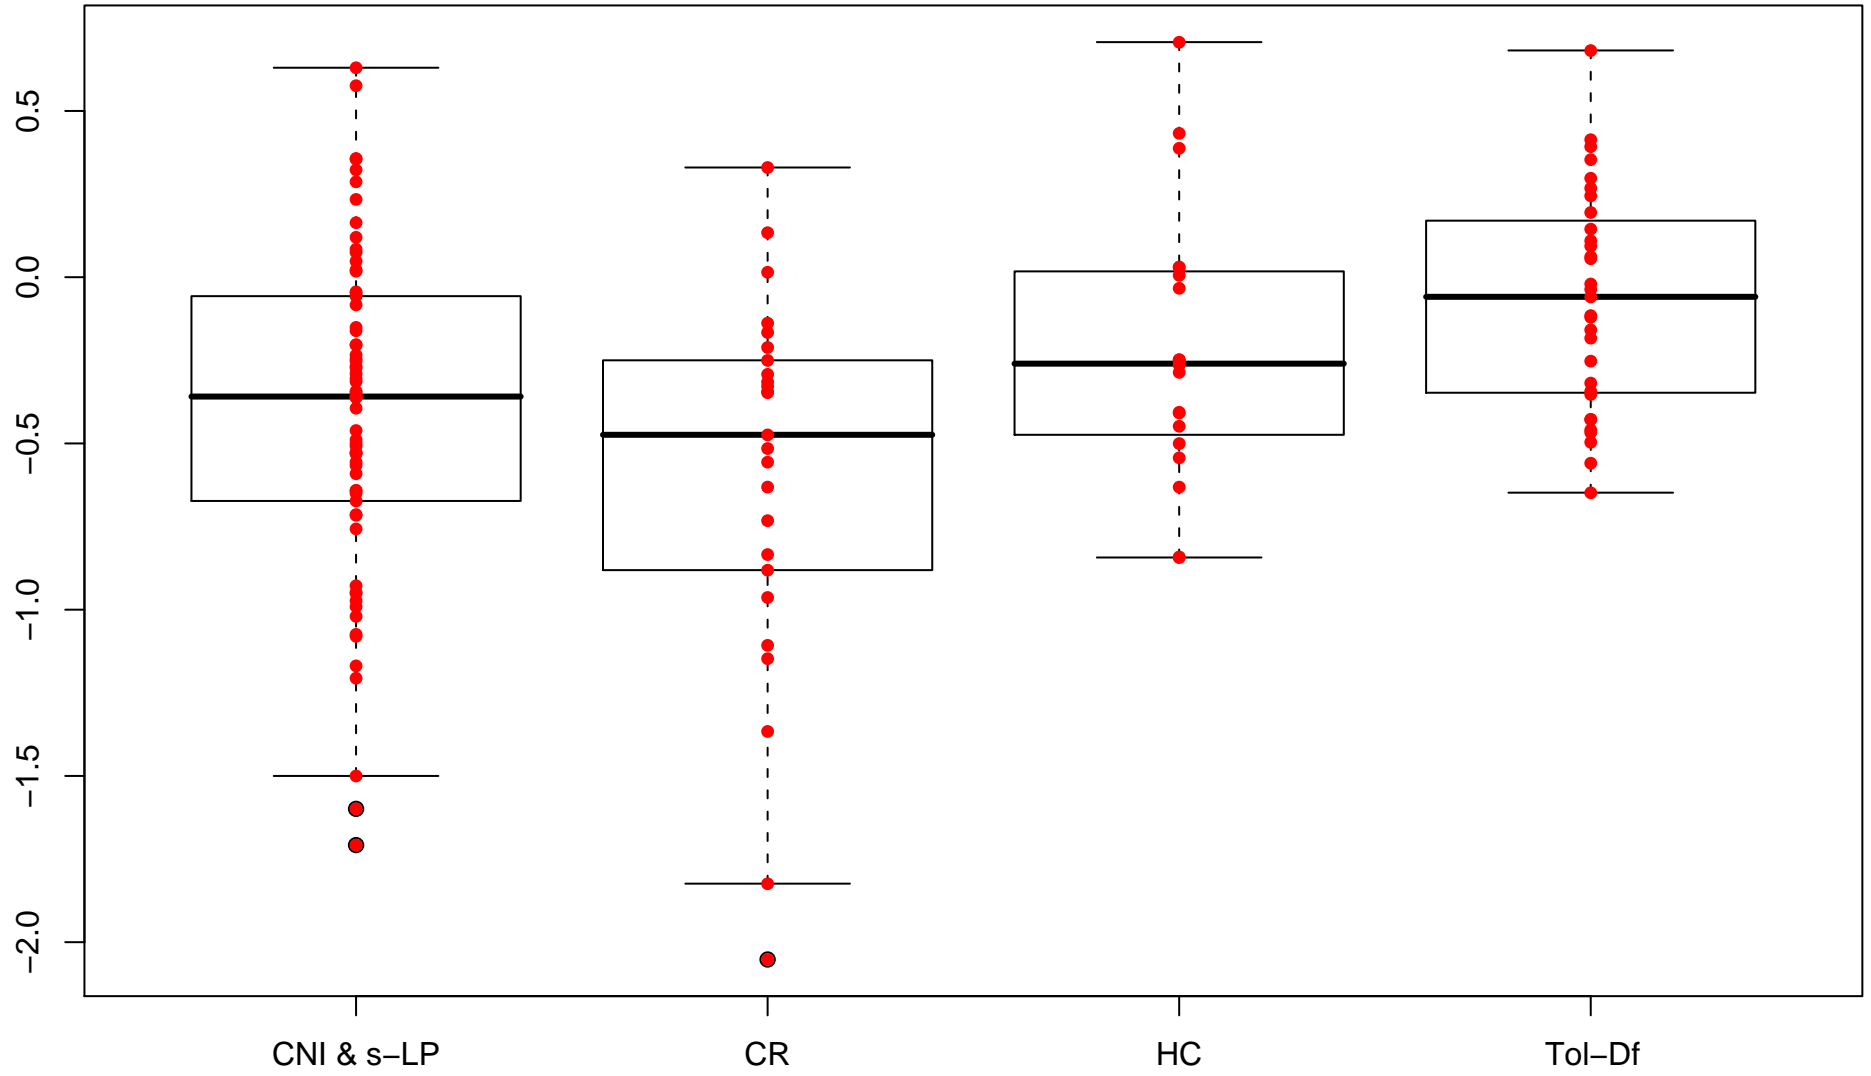

Rank 647 : HRH2  
0.0006628

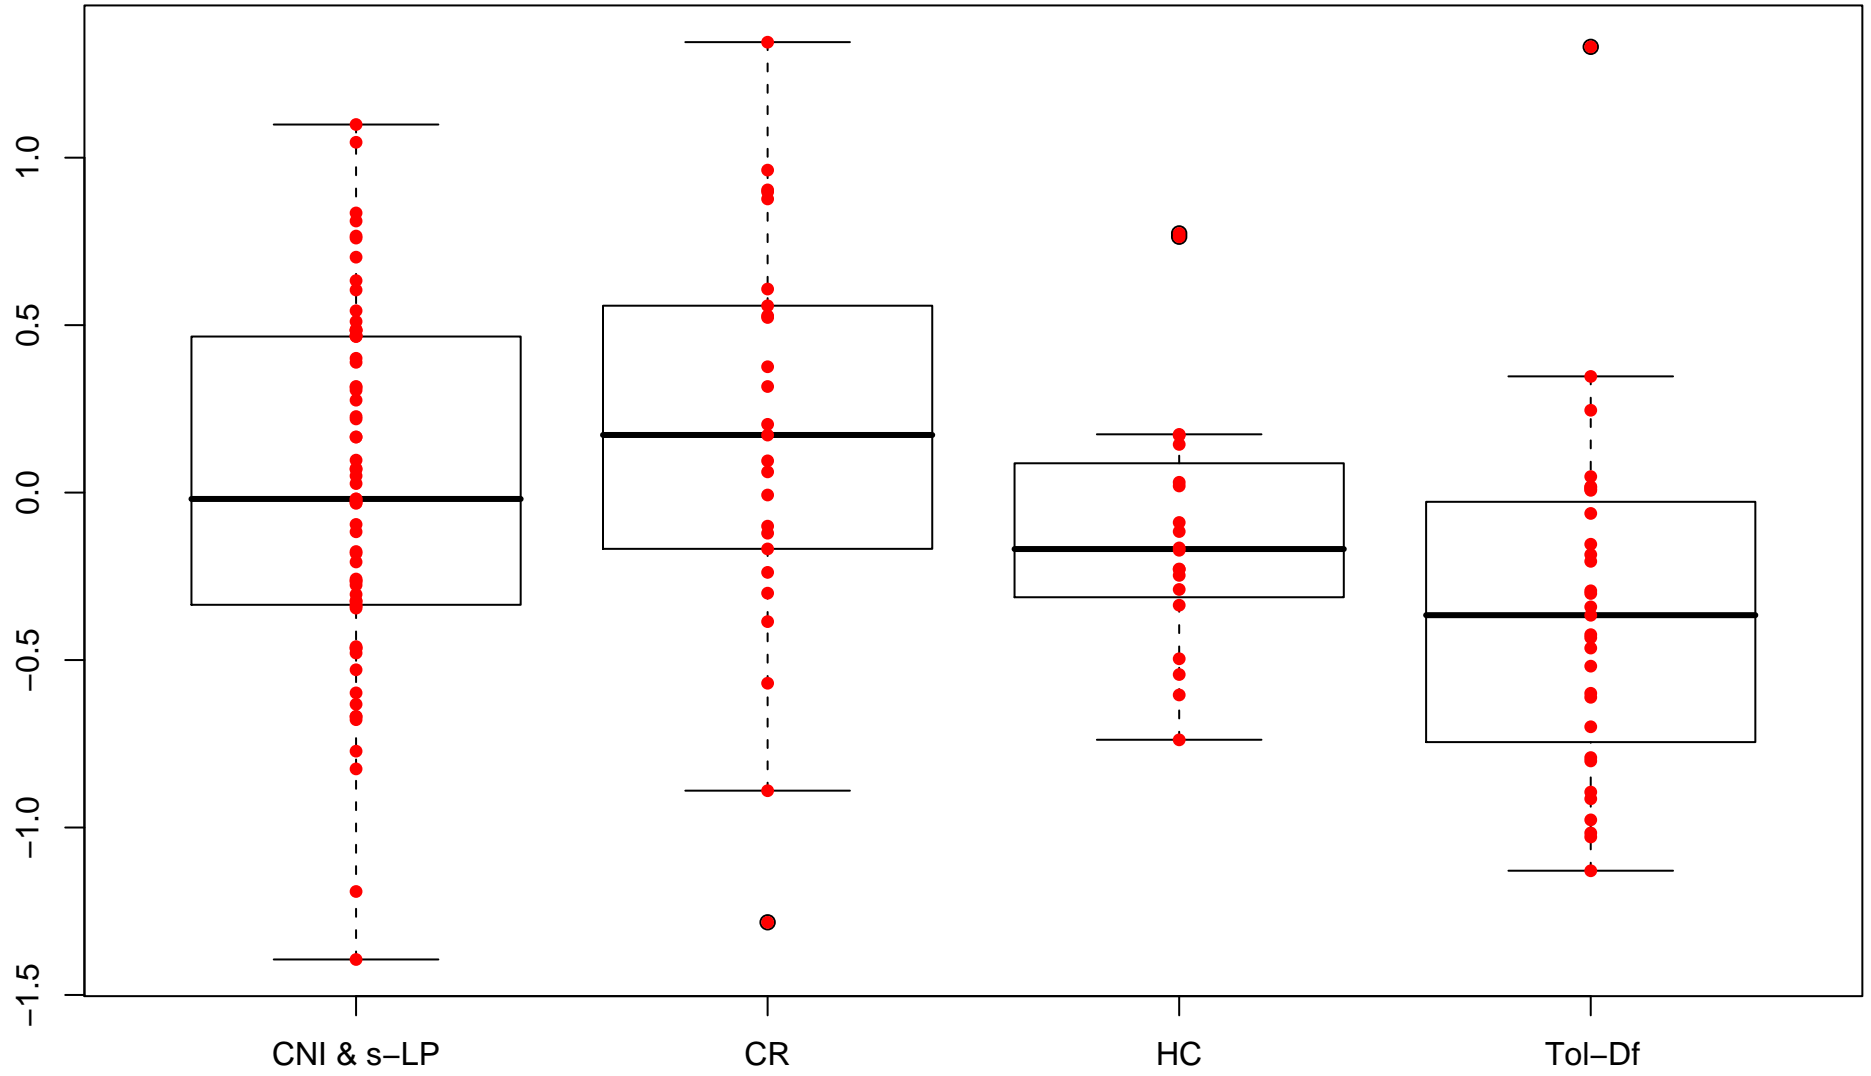



Rank 648 : CRIP3  
0.0006634

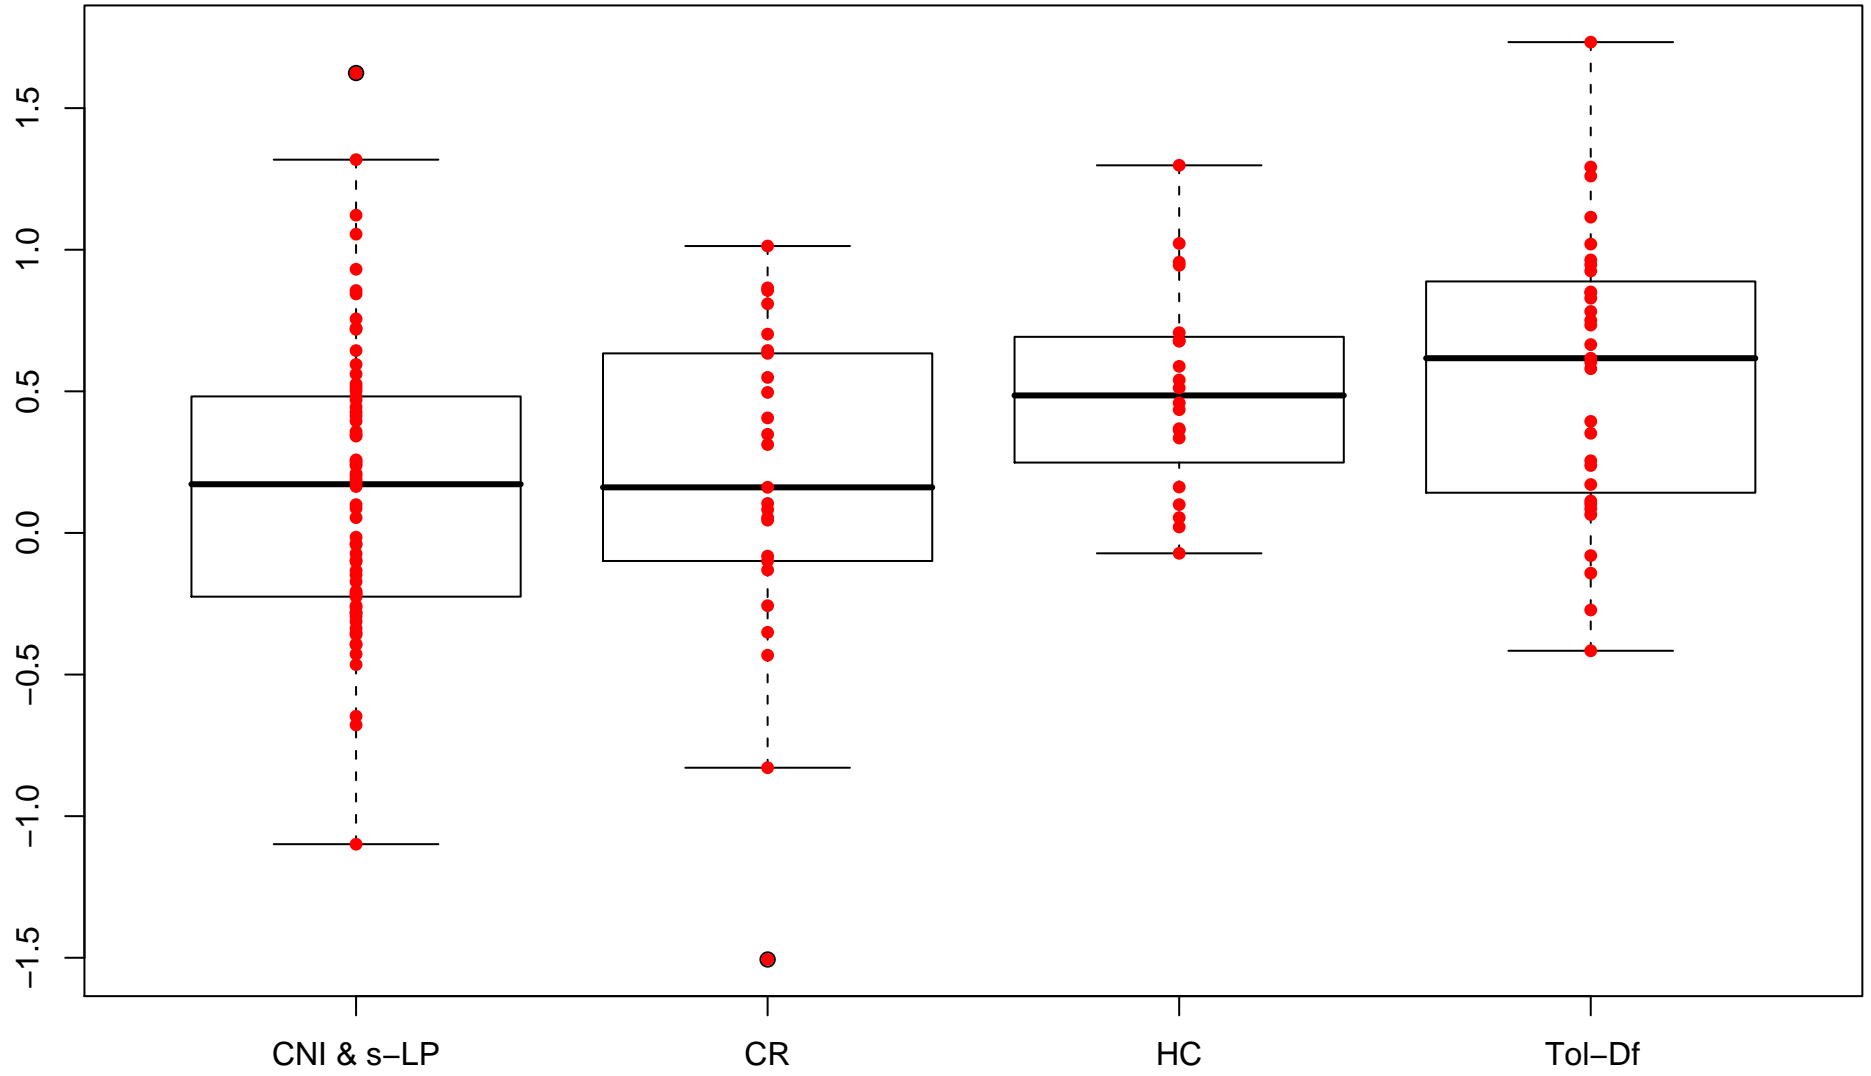

Rank 649 : LOC284262  
0.0006664

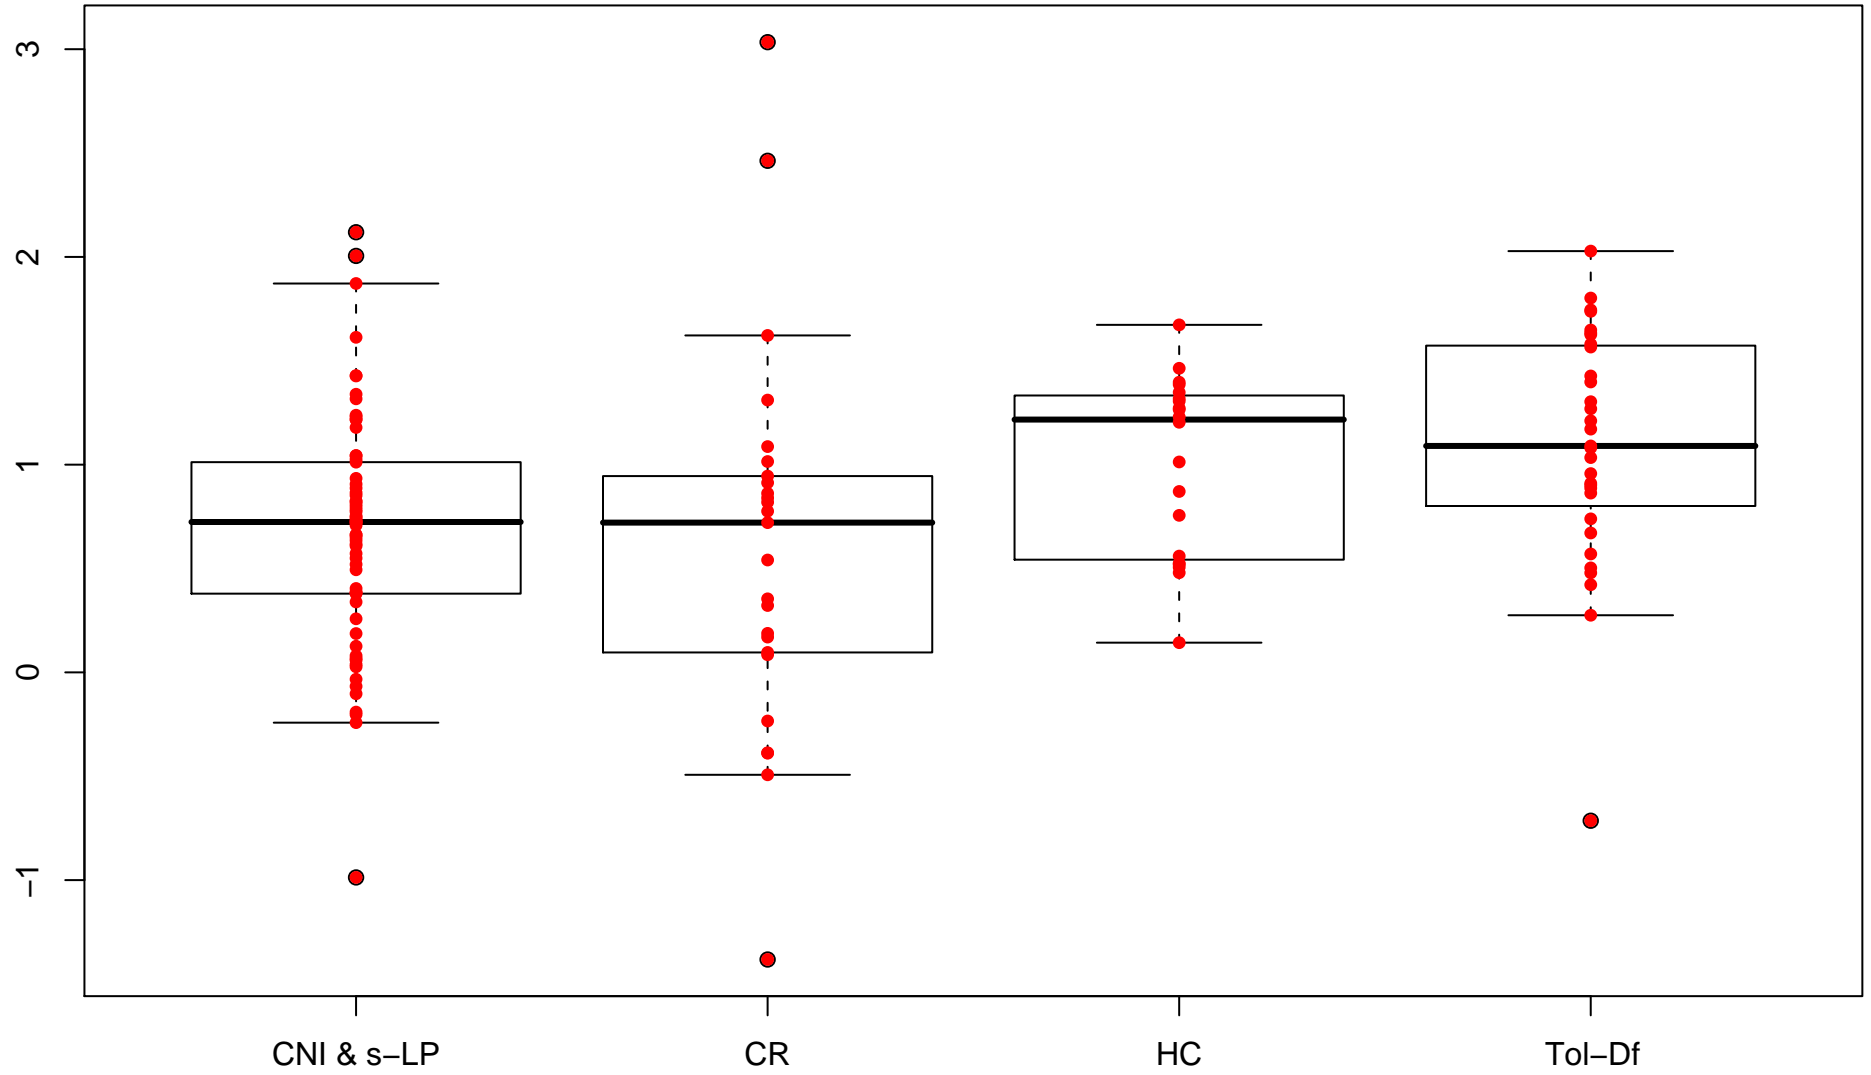

Rank 650 : NPIP;LOC339047;LOC642778;LOC642799  
0.0006678

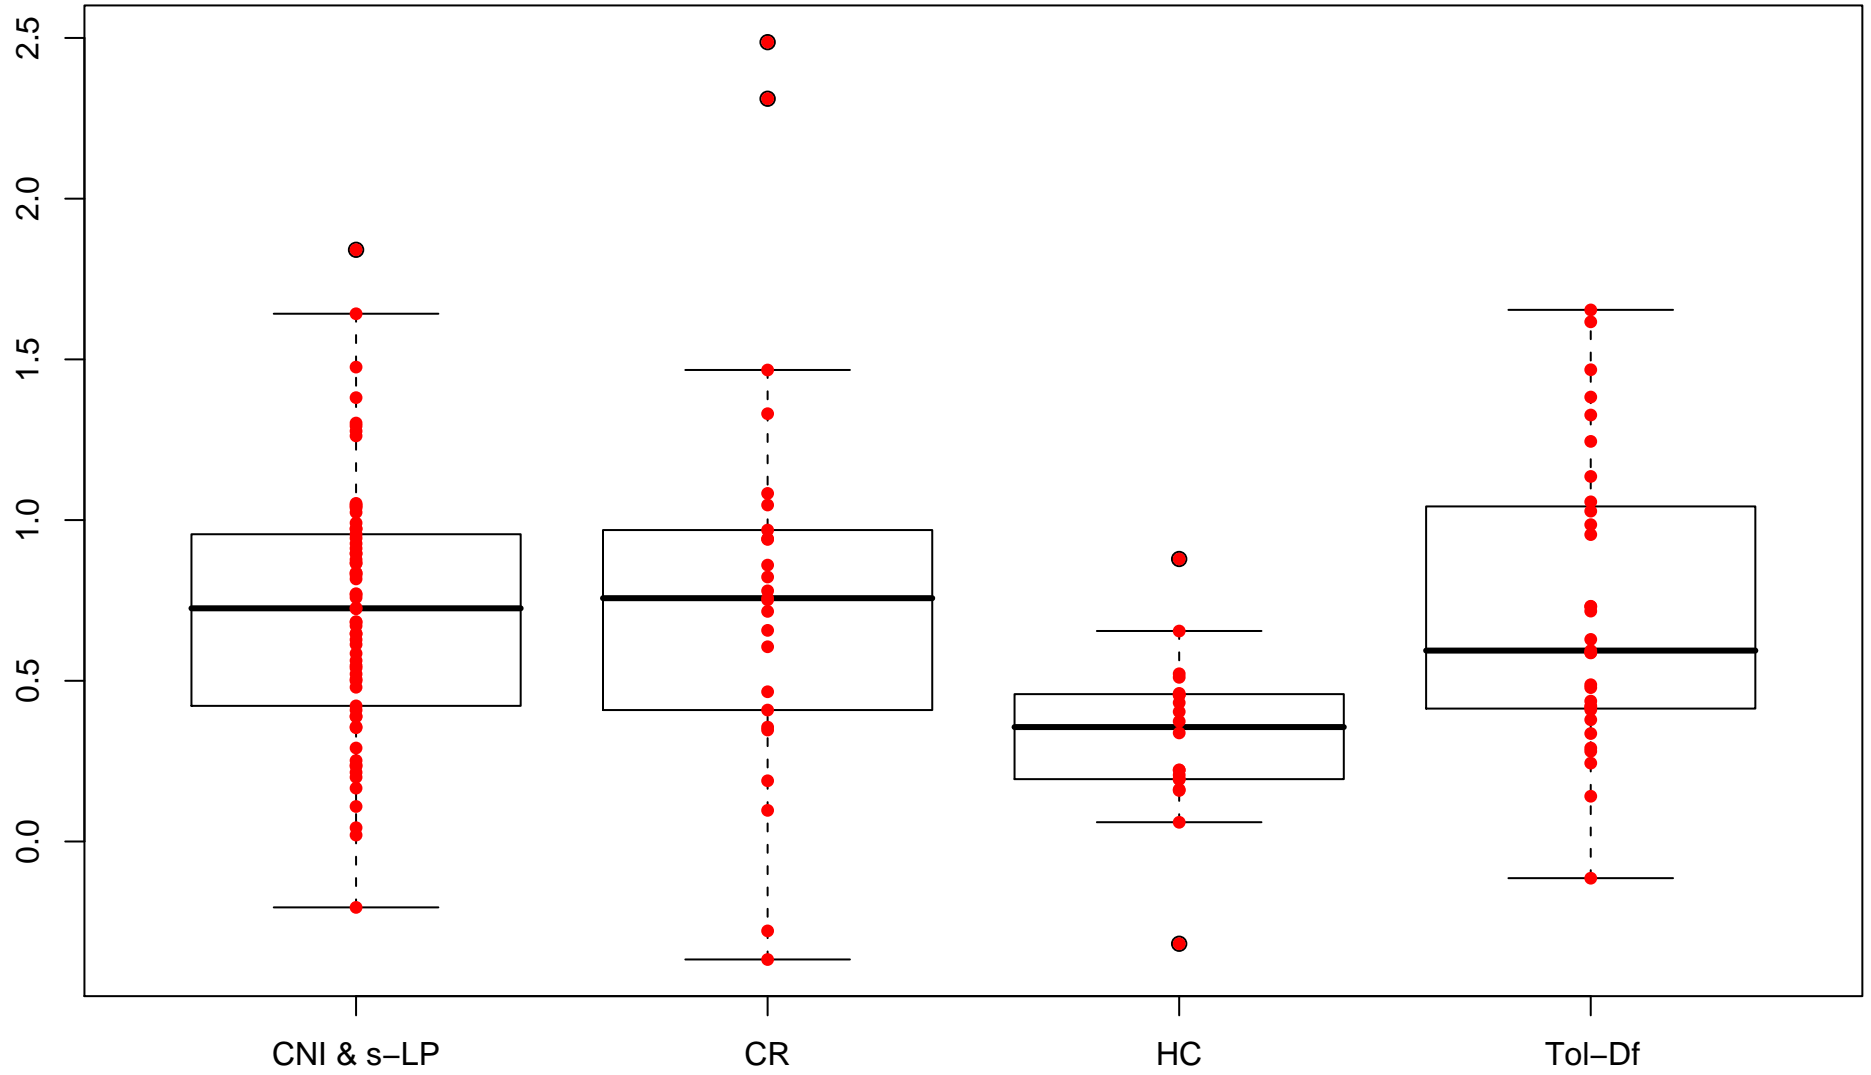

Rank 651 : TGFBR1  
0.0006695

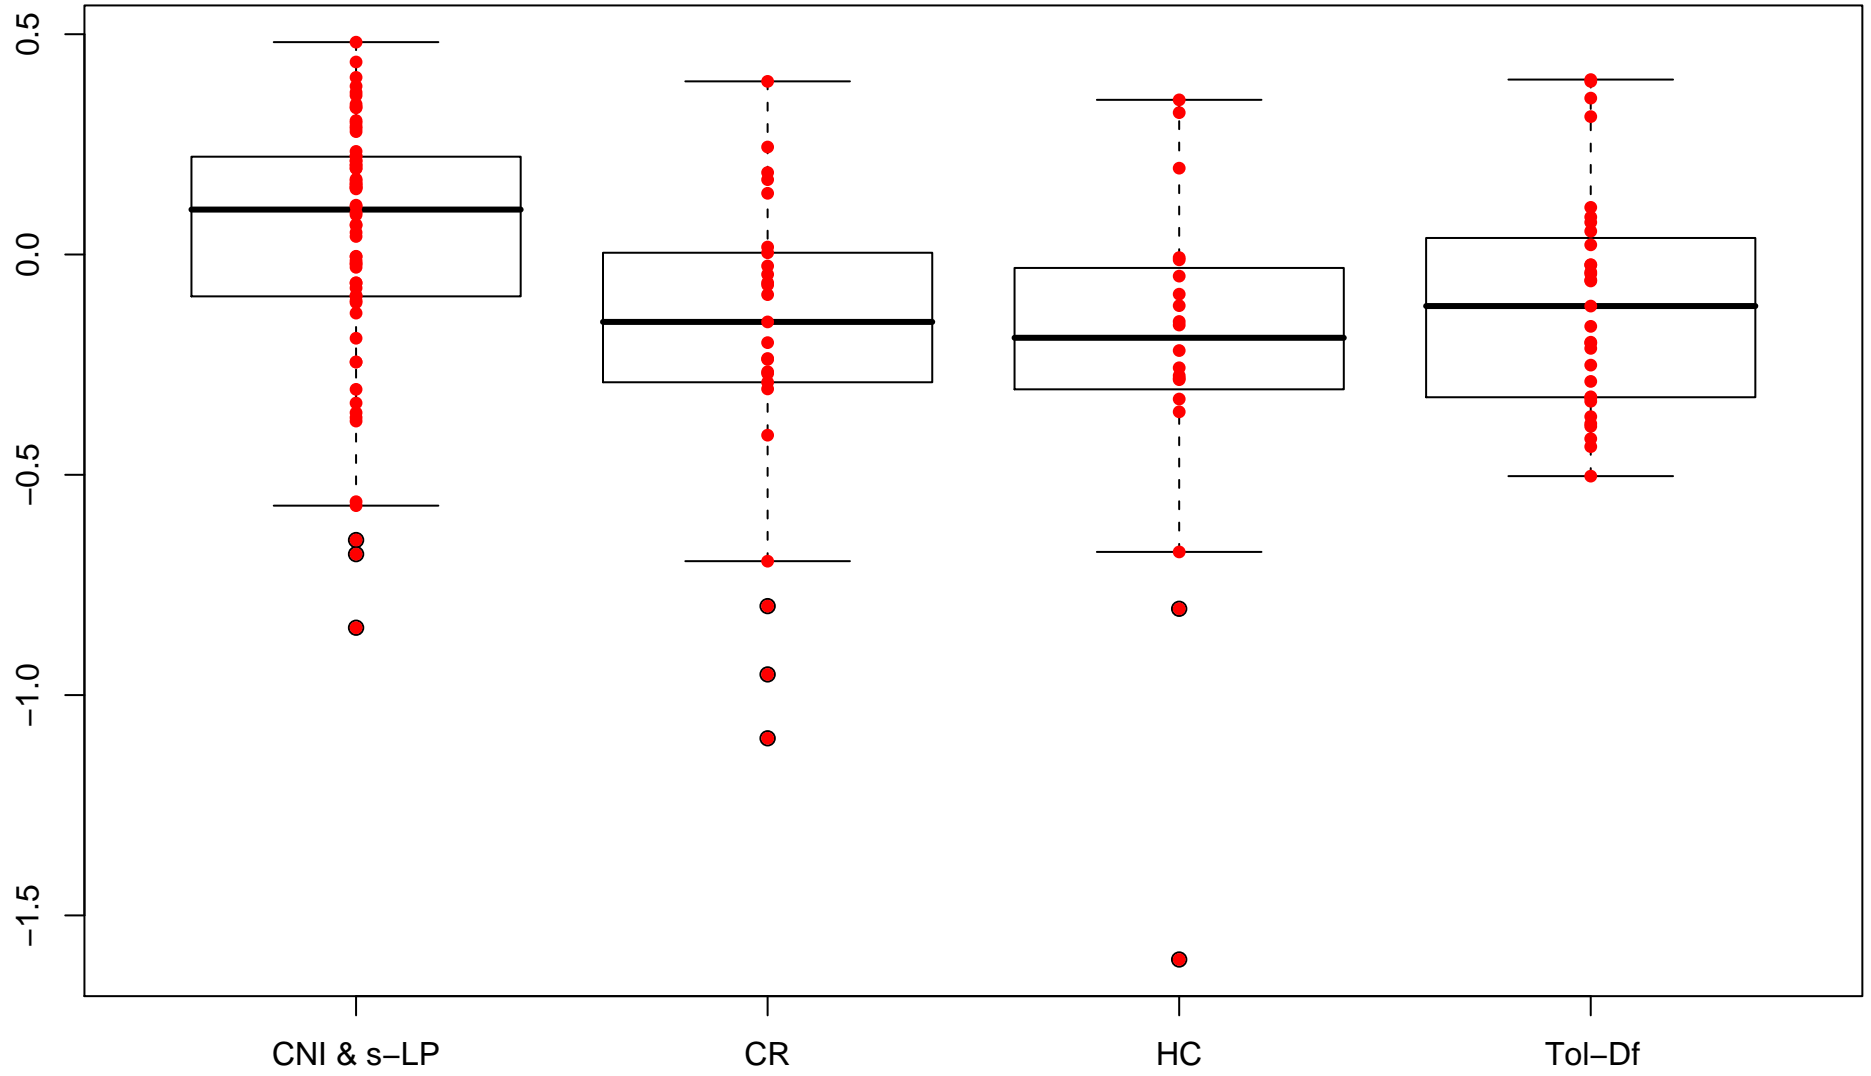

Rank 652 : TGFB1  
0.0006712

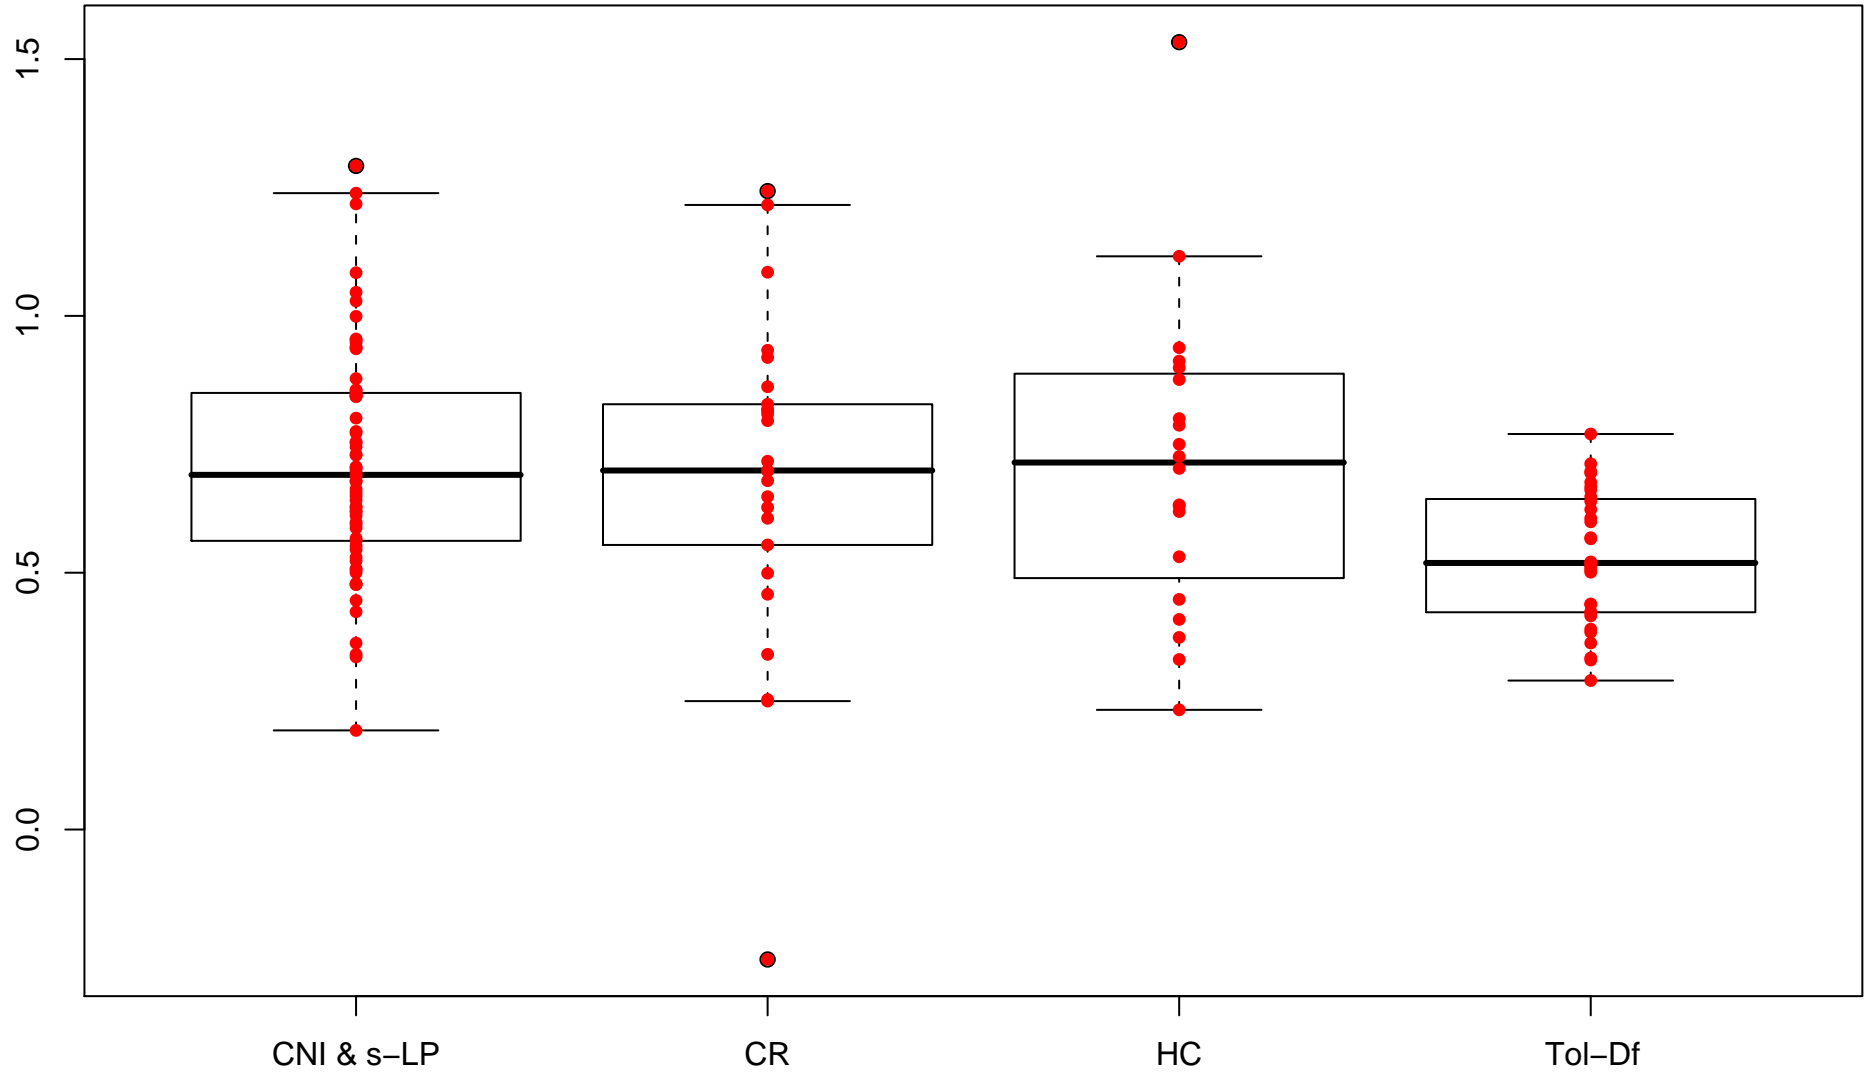

Rank 653 : HPCAL4  
0.0006751

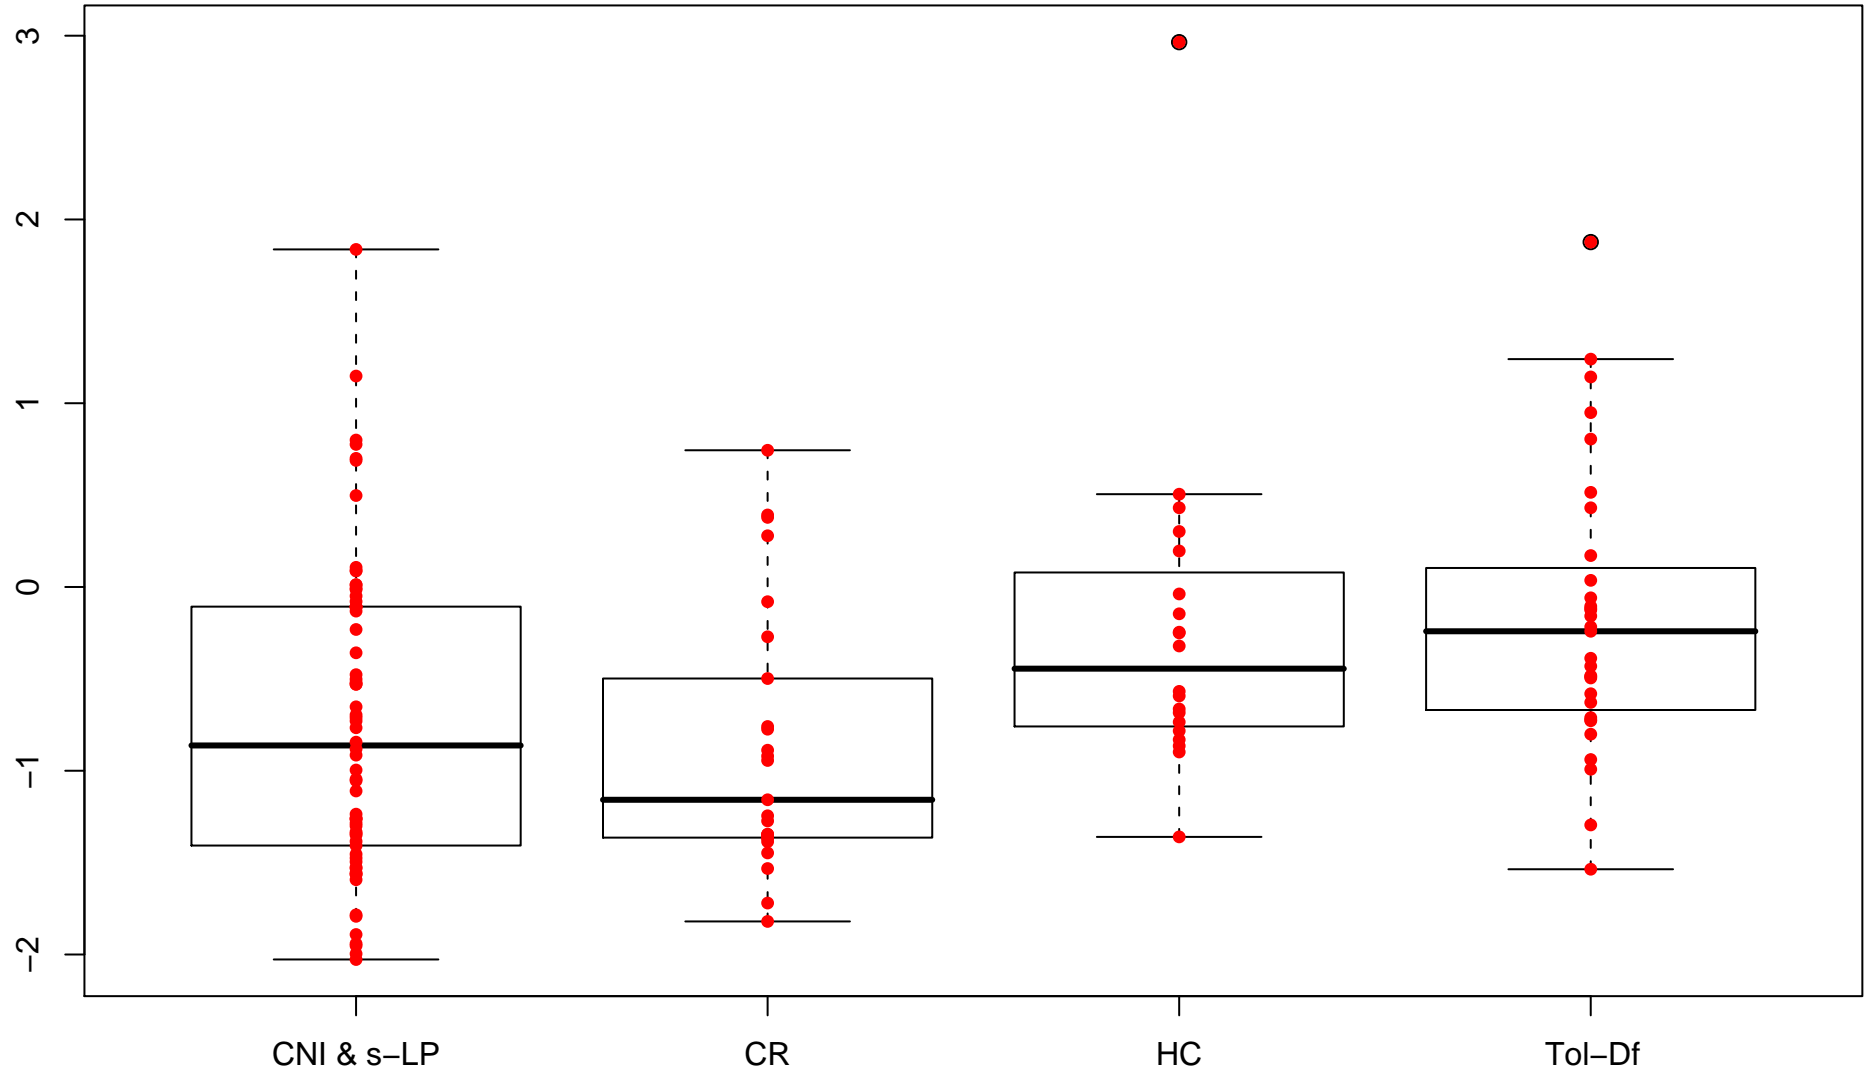

Rank 654 : LIMK1  
0.0006772

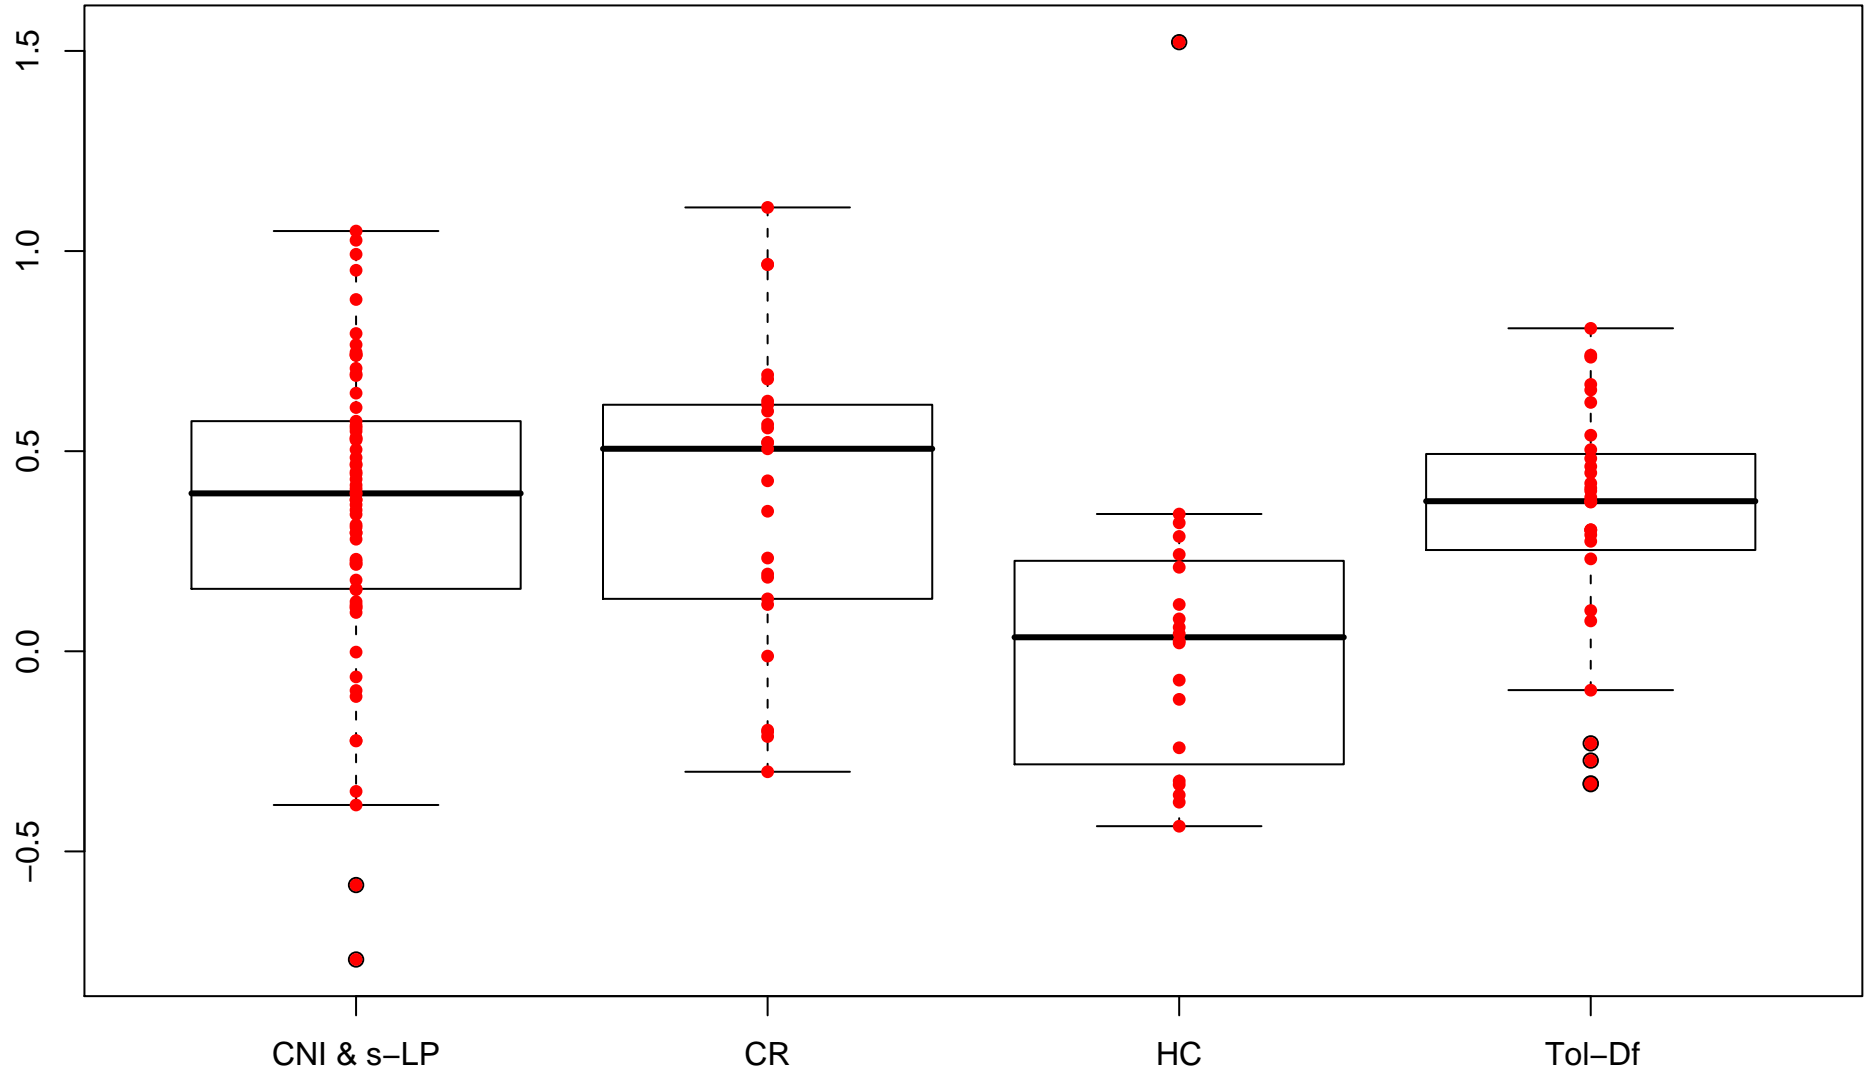

Rank 655 : NDUFA4  
0.0006818

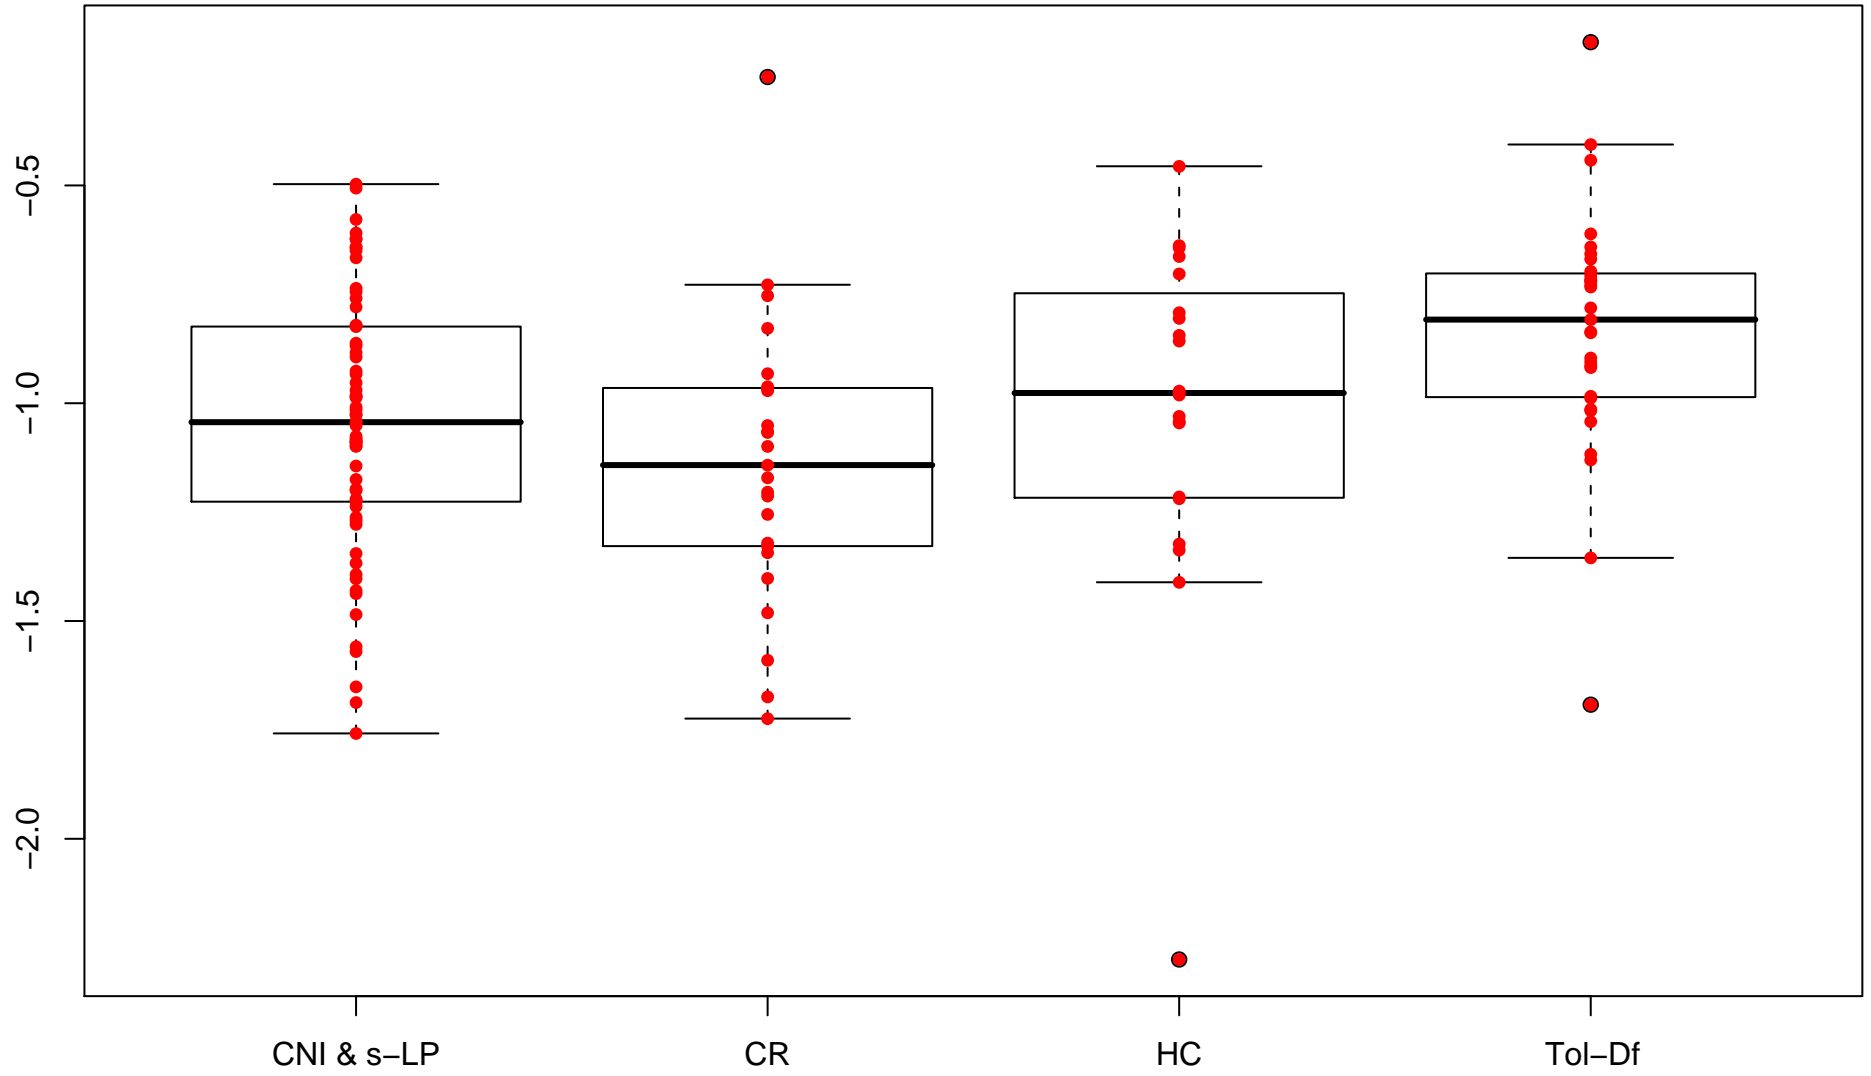



Rank 656 : IL24  
0.0006824

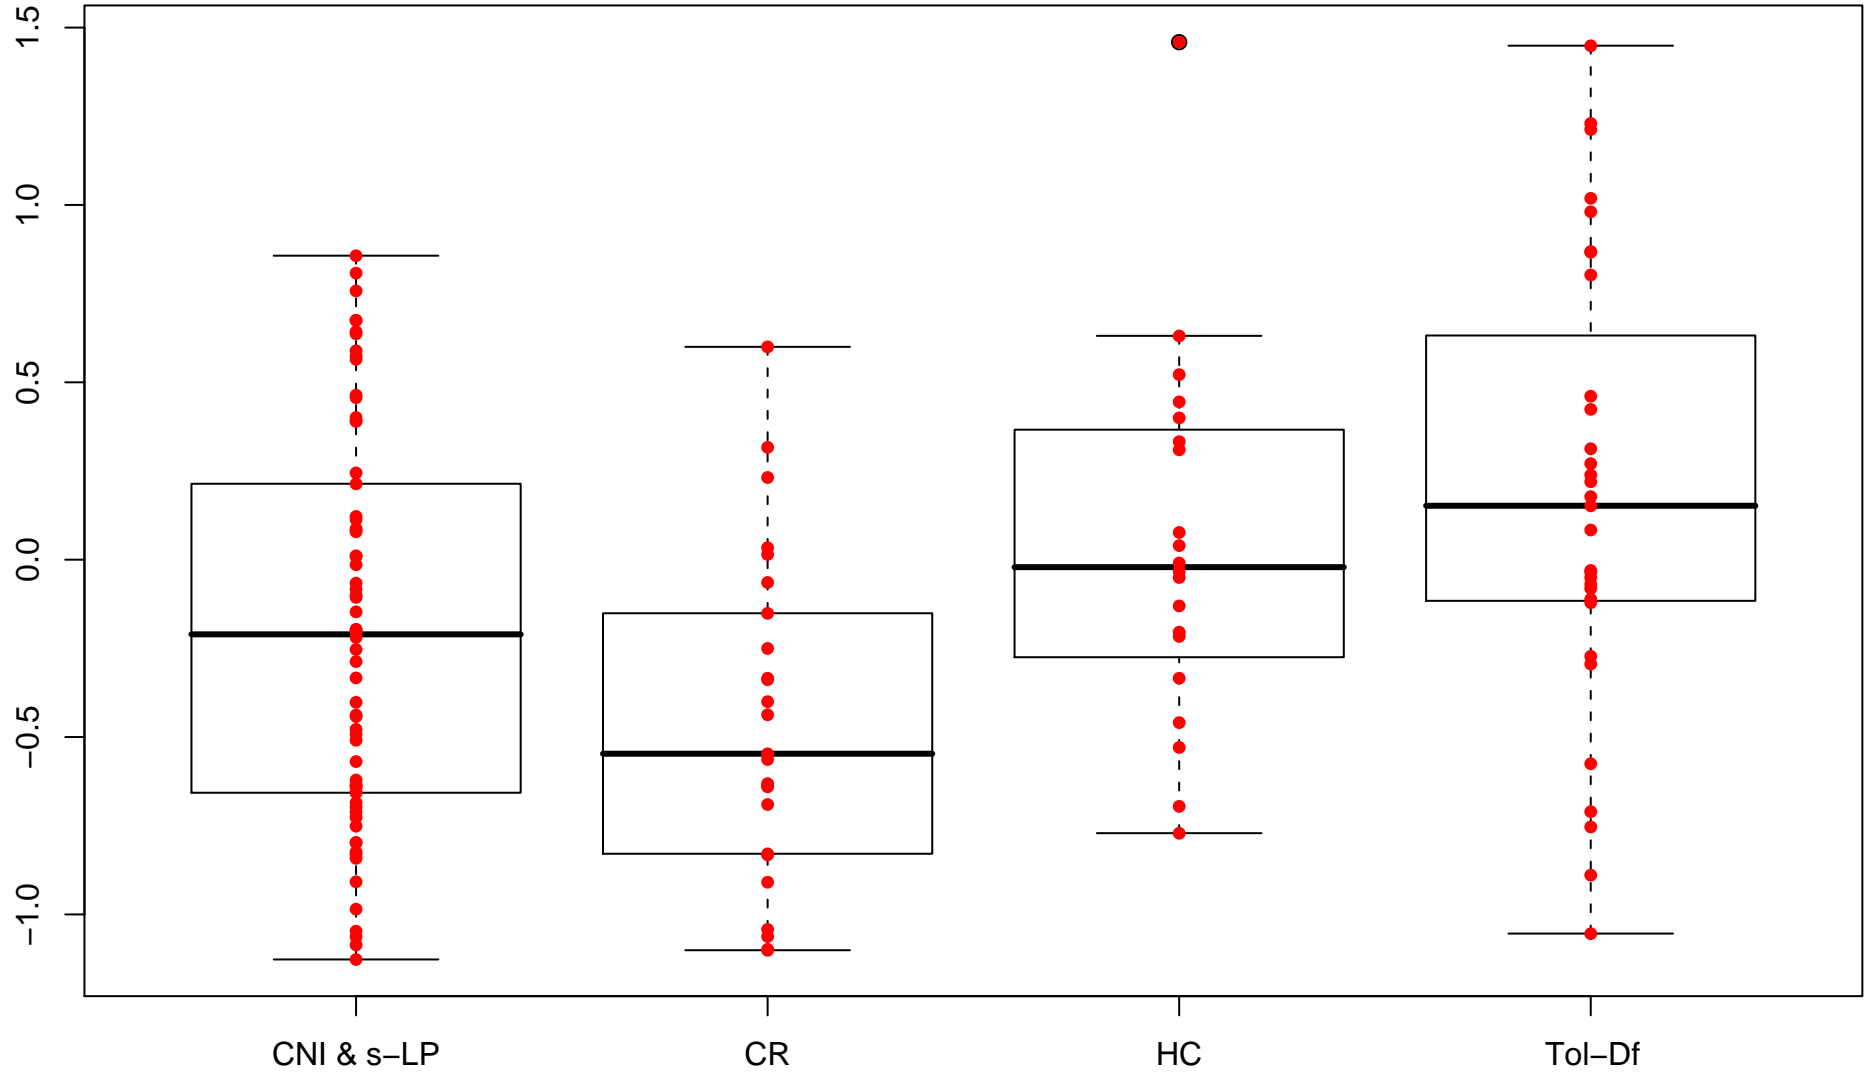

Rank 657 : EIF1  
0.0006839

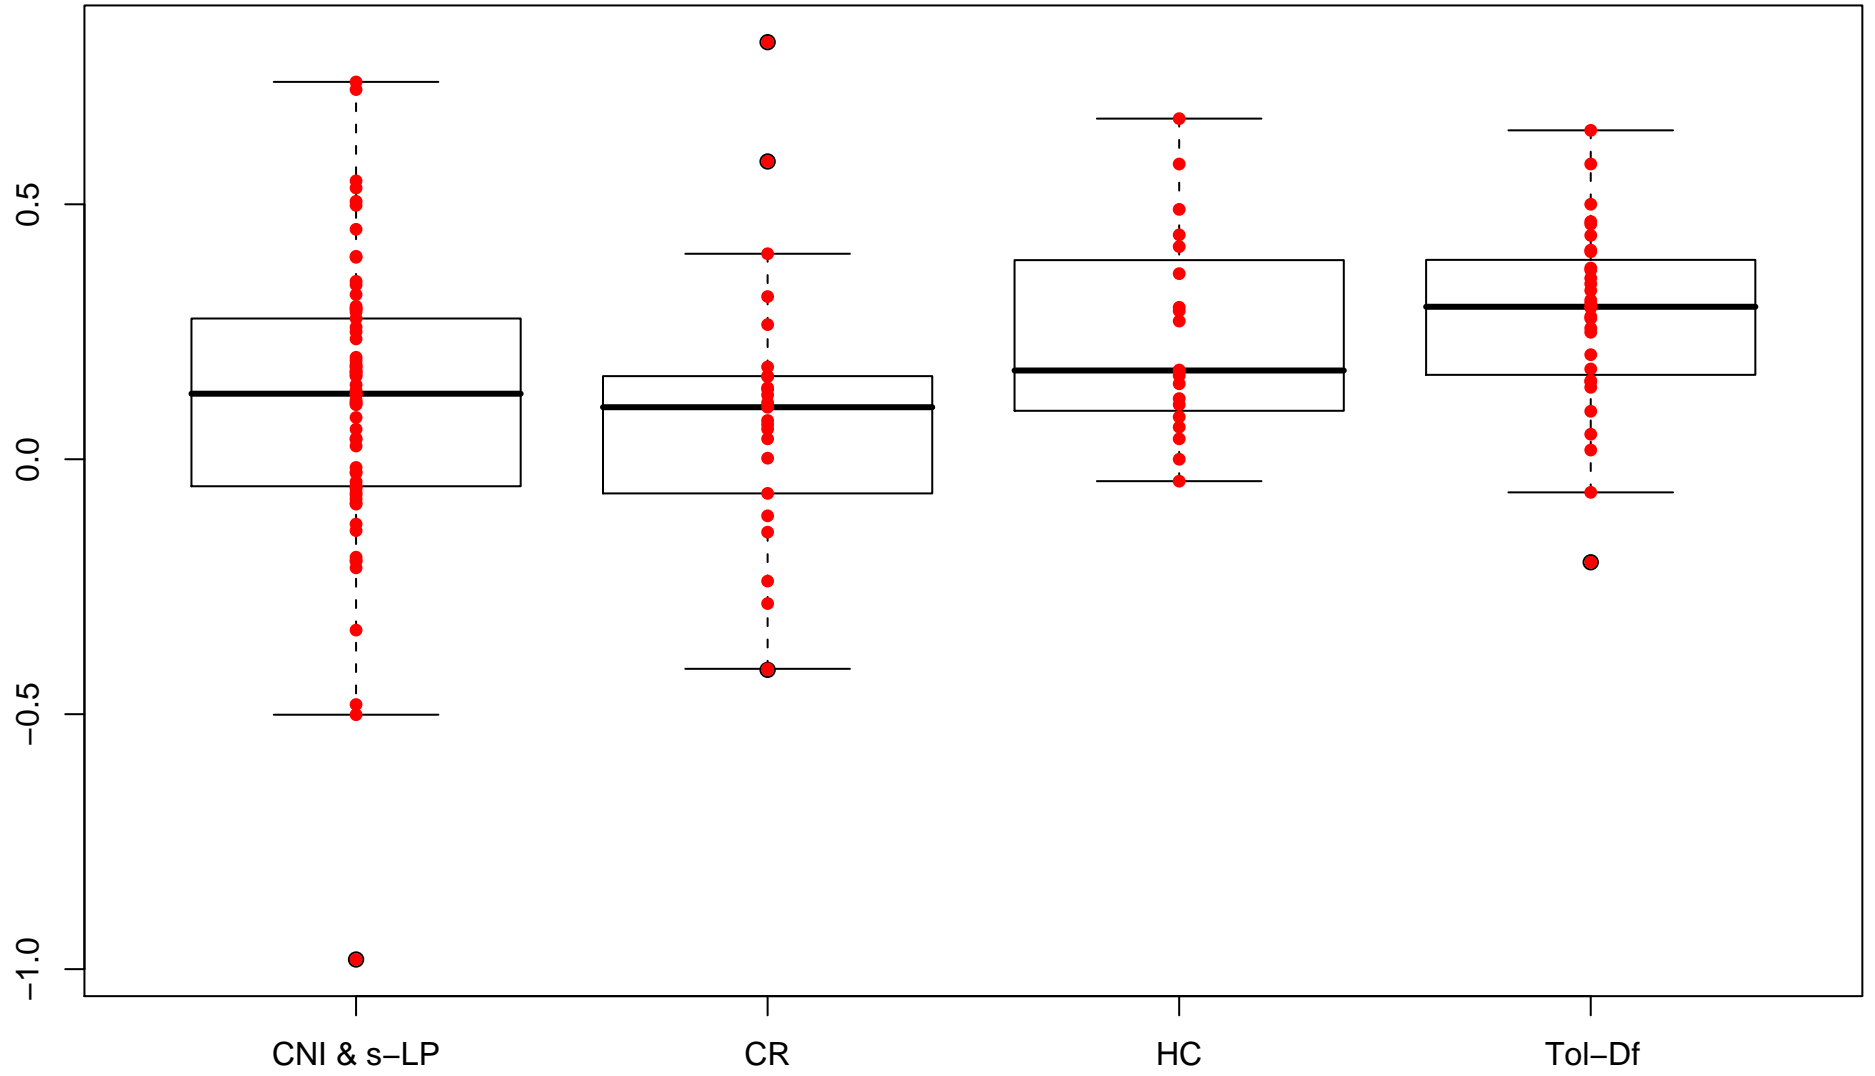

Rank 658 : AW270158  
0.0006939

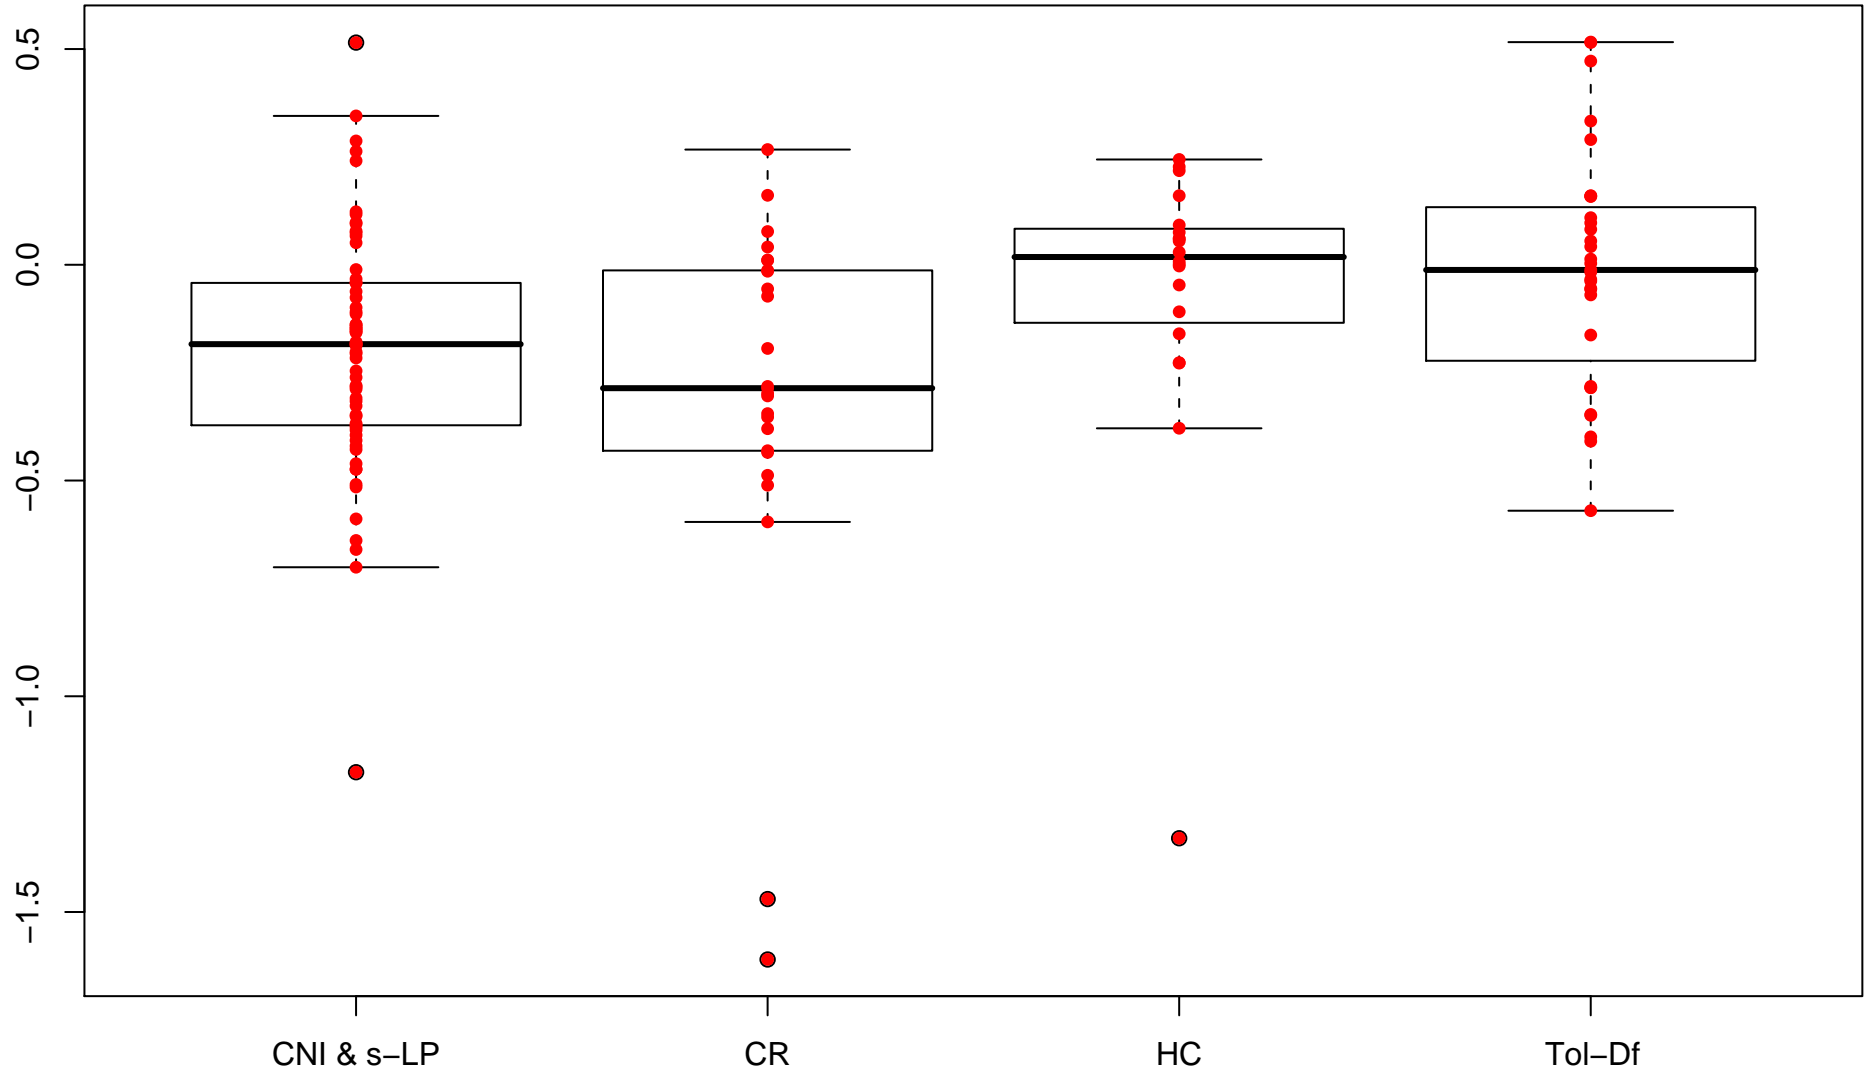

Rank 659 : TSHZ3  
0.0006997

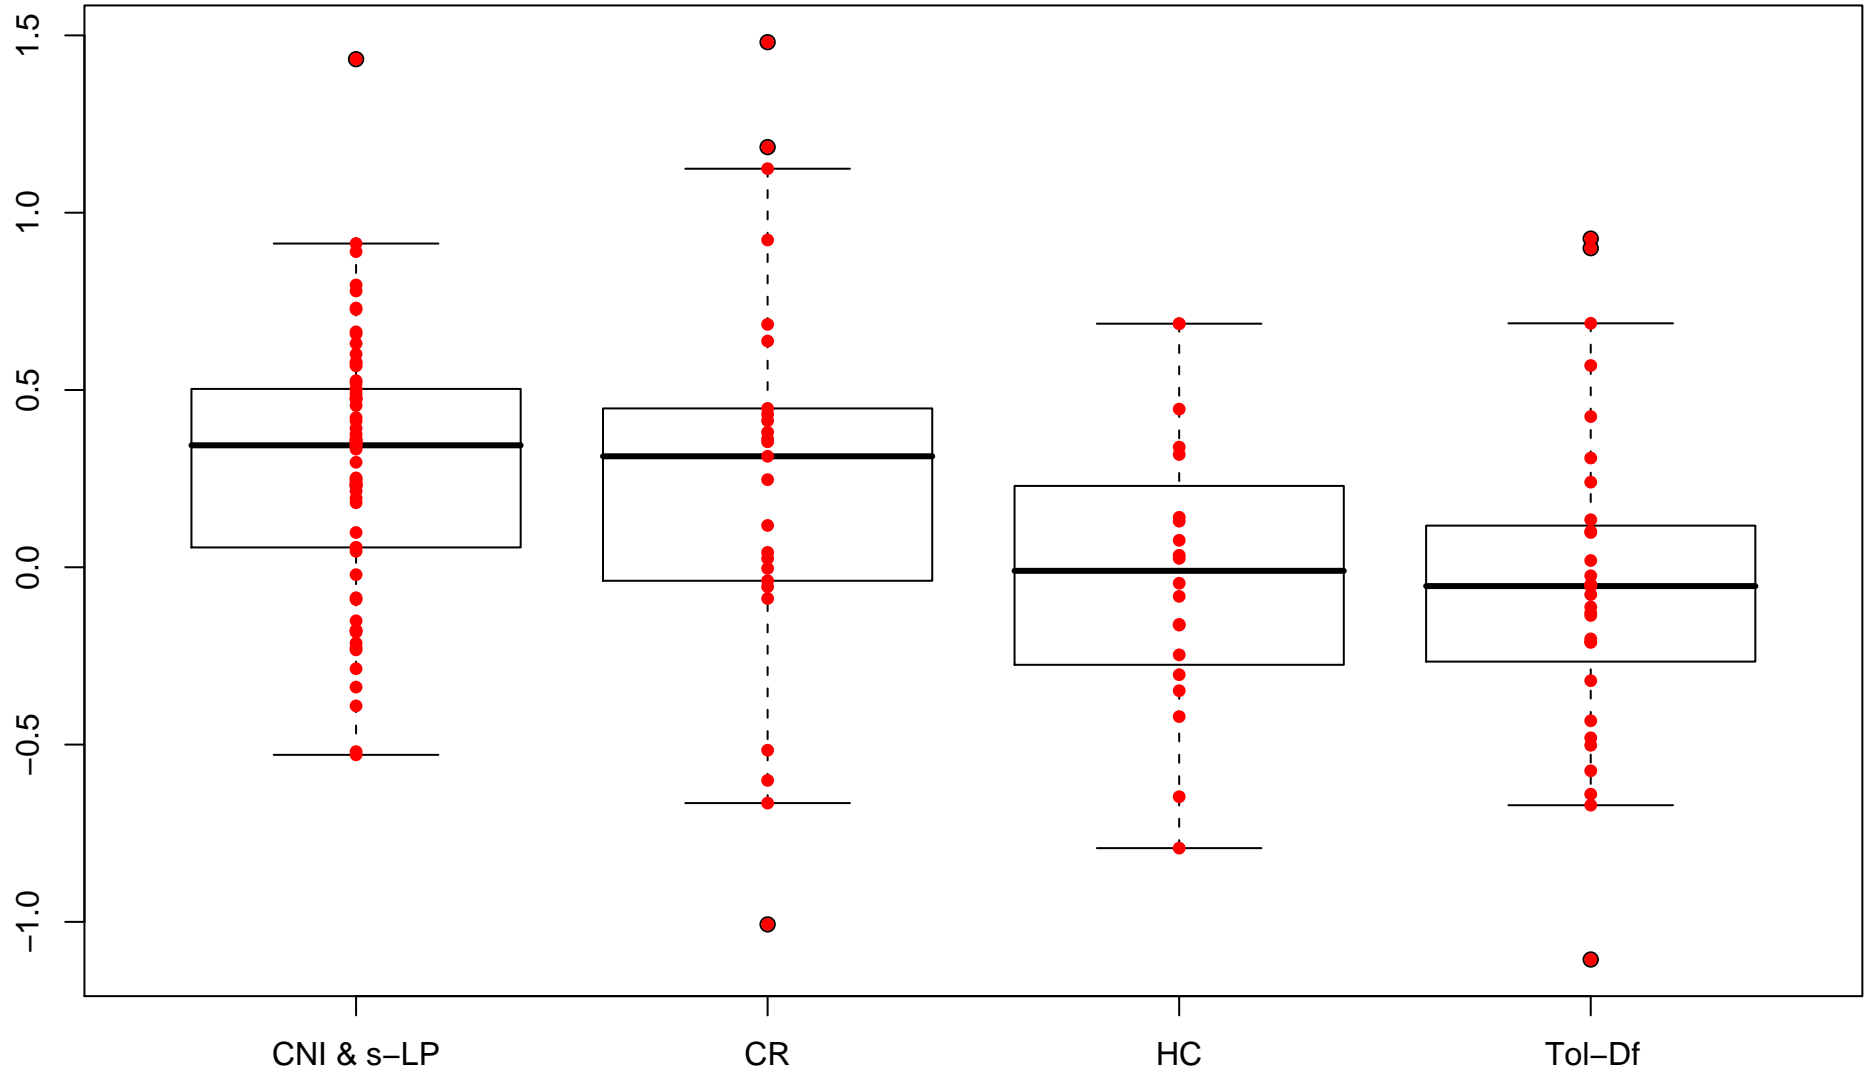

Rank 660 : FCGR2A;FCGR2C  
0.0007006

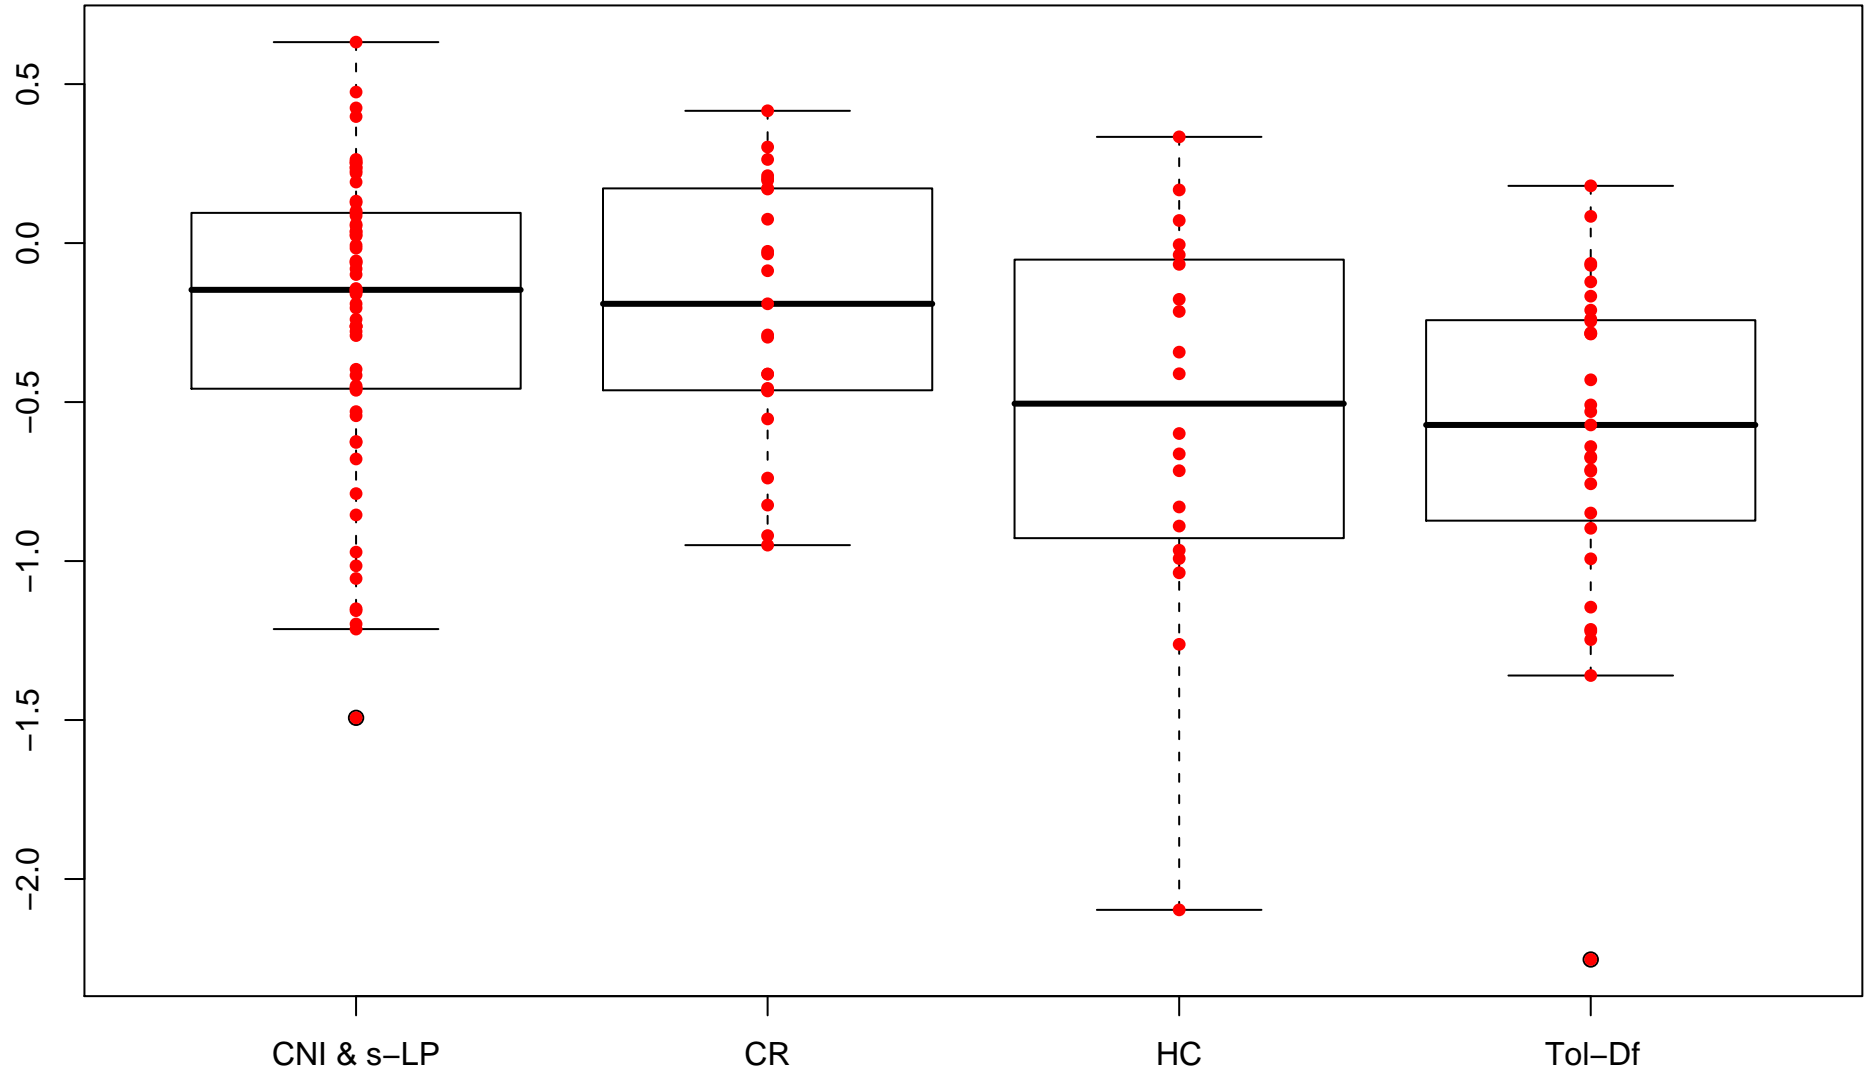

Rank 661 : BC028022  
0.0007024

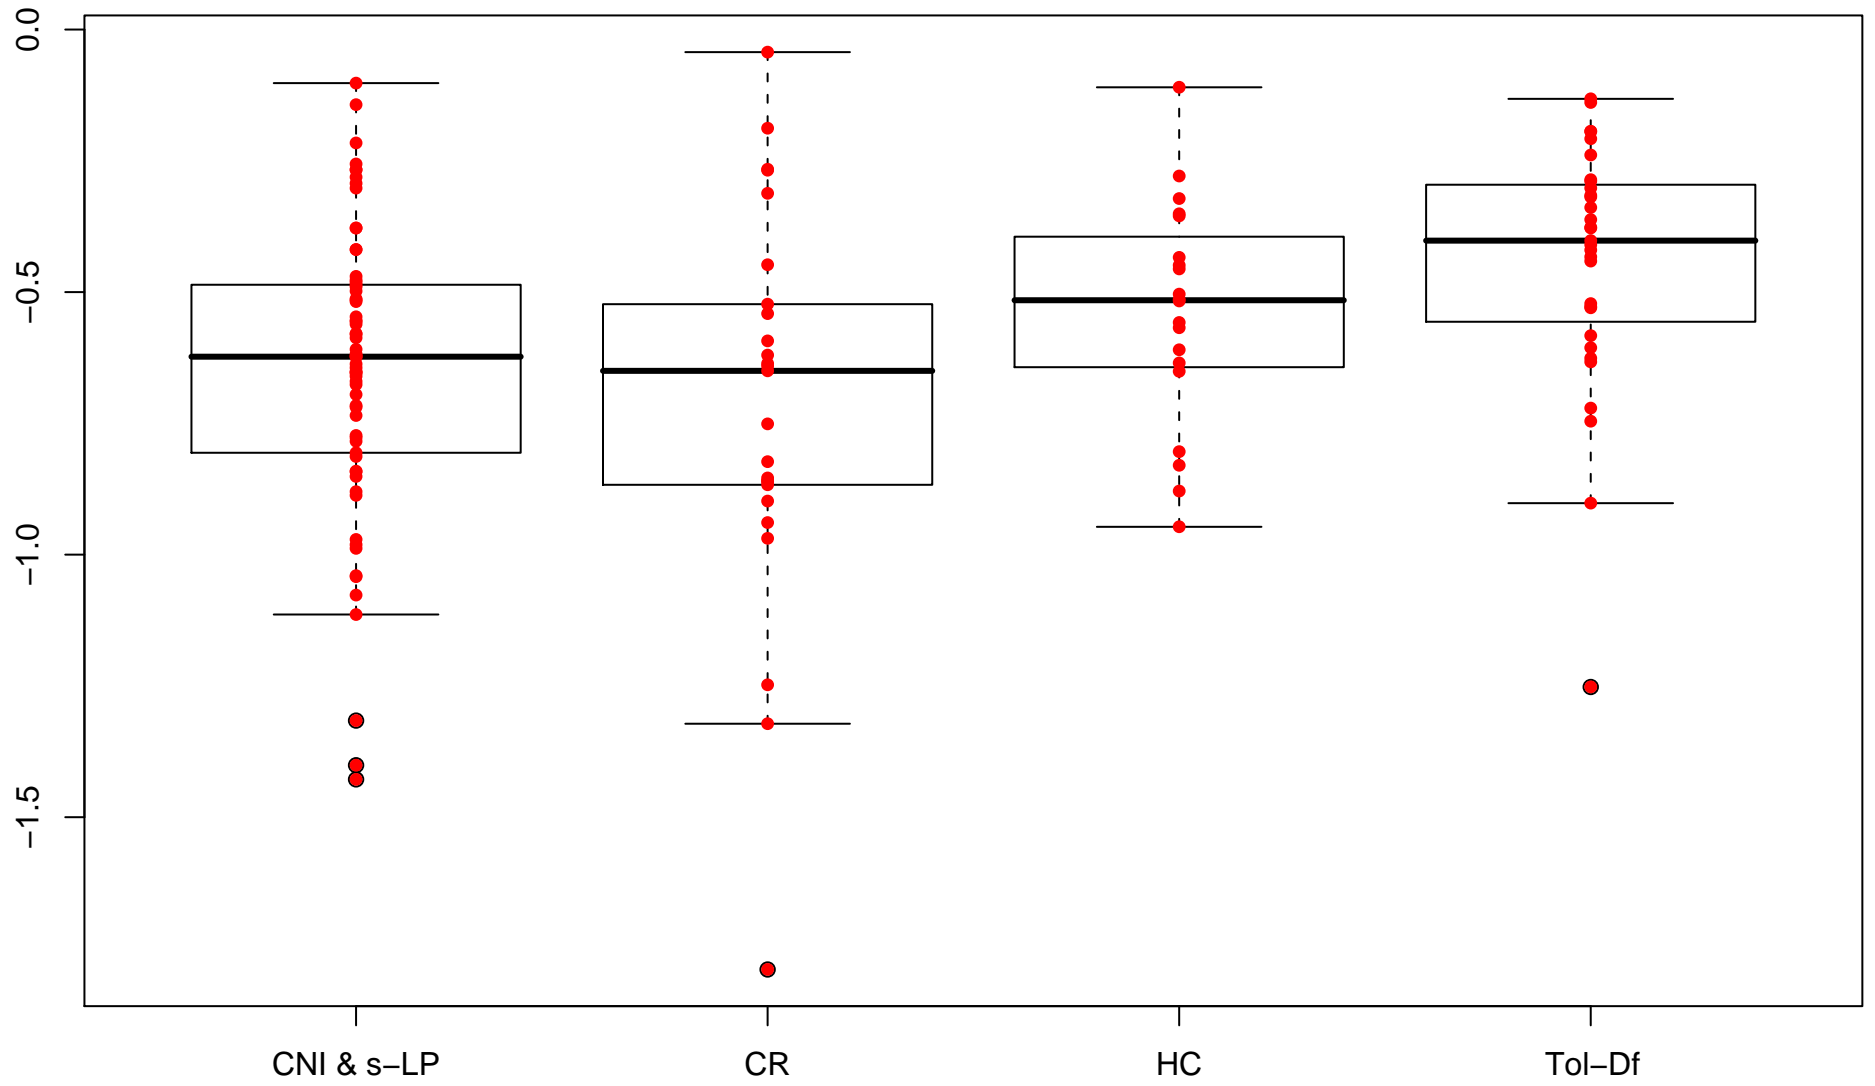

Rank 662 : MMP8  
0.0007035

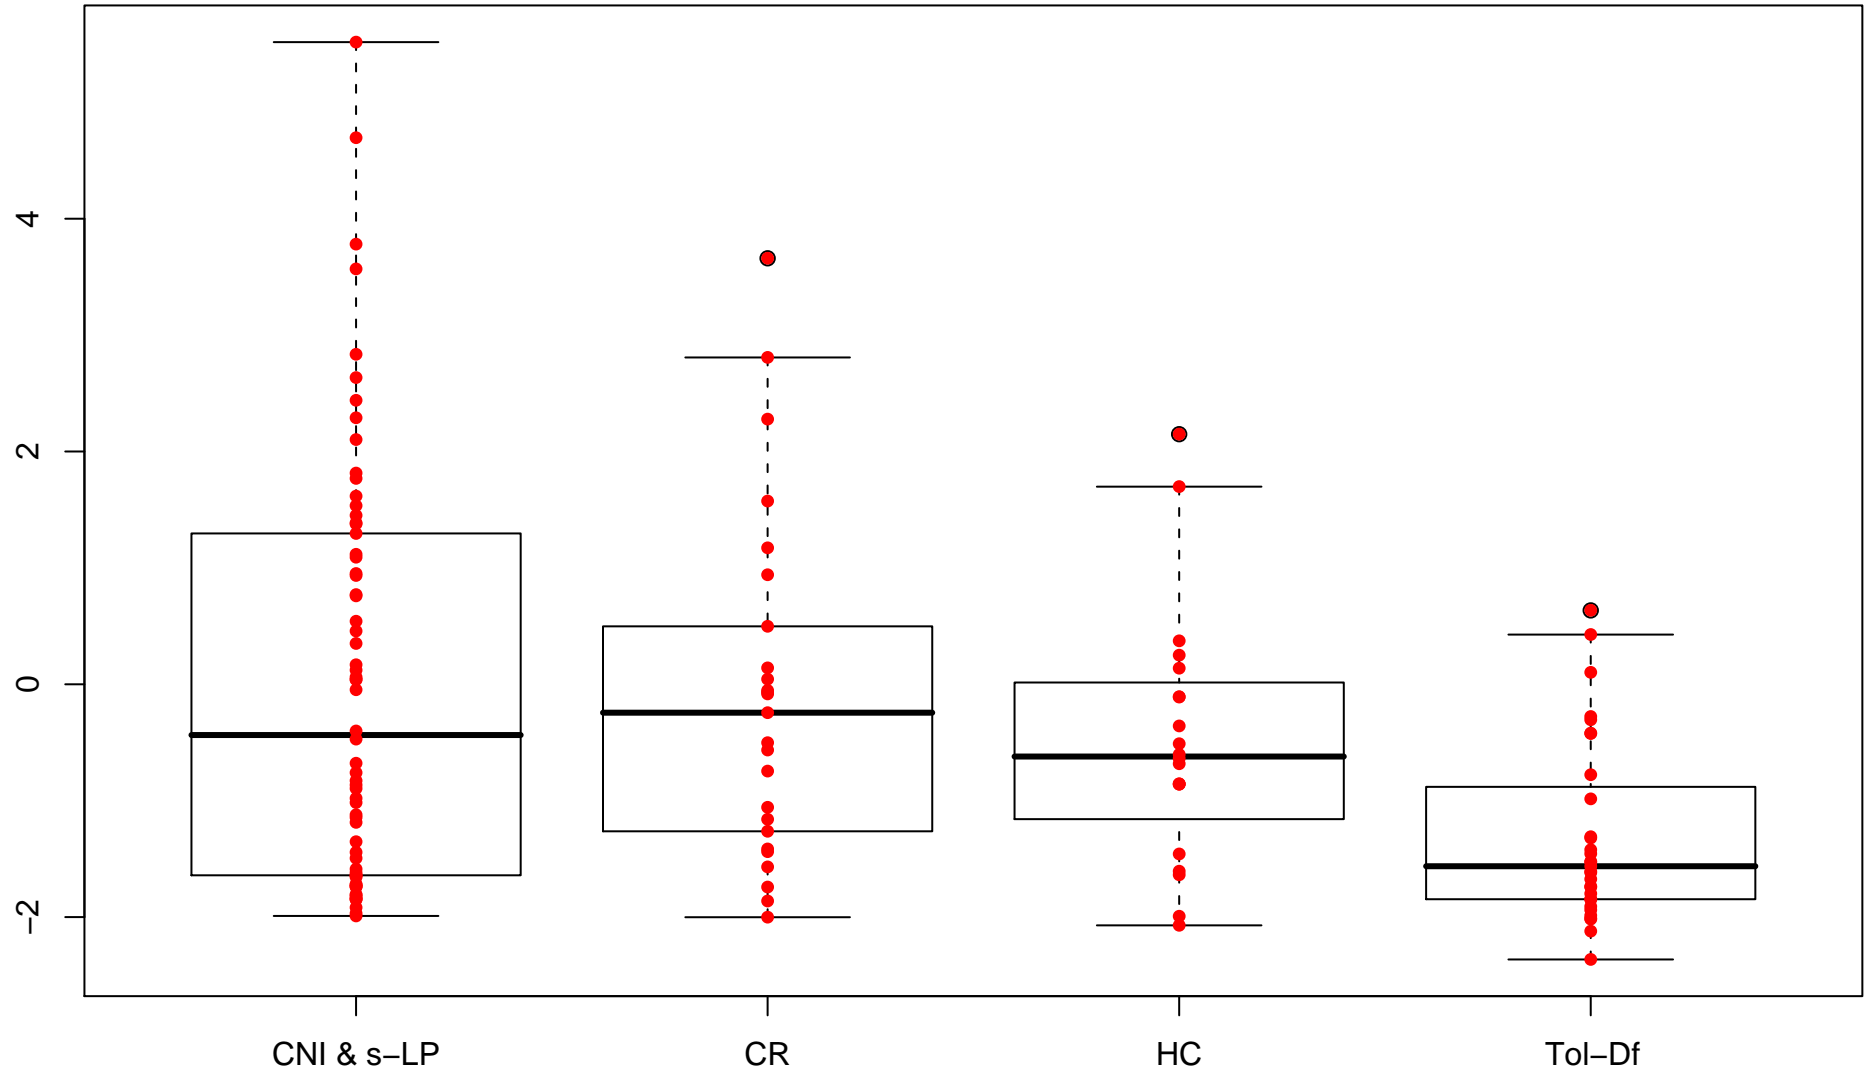

Rank 663 : AQP3  
0.0007086

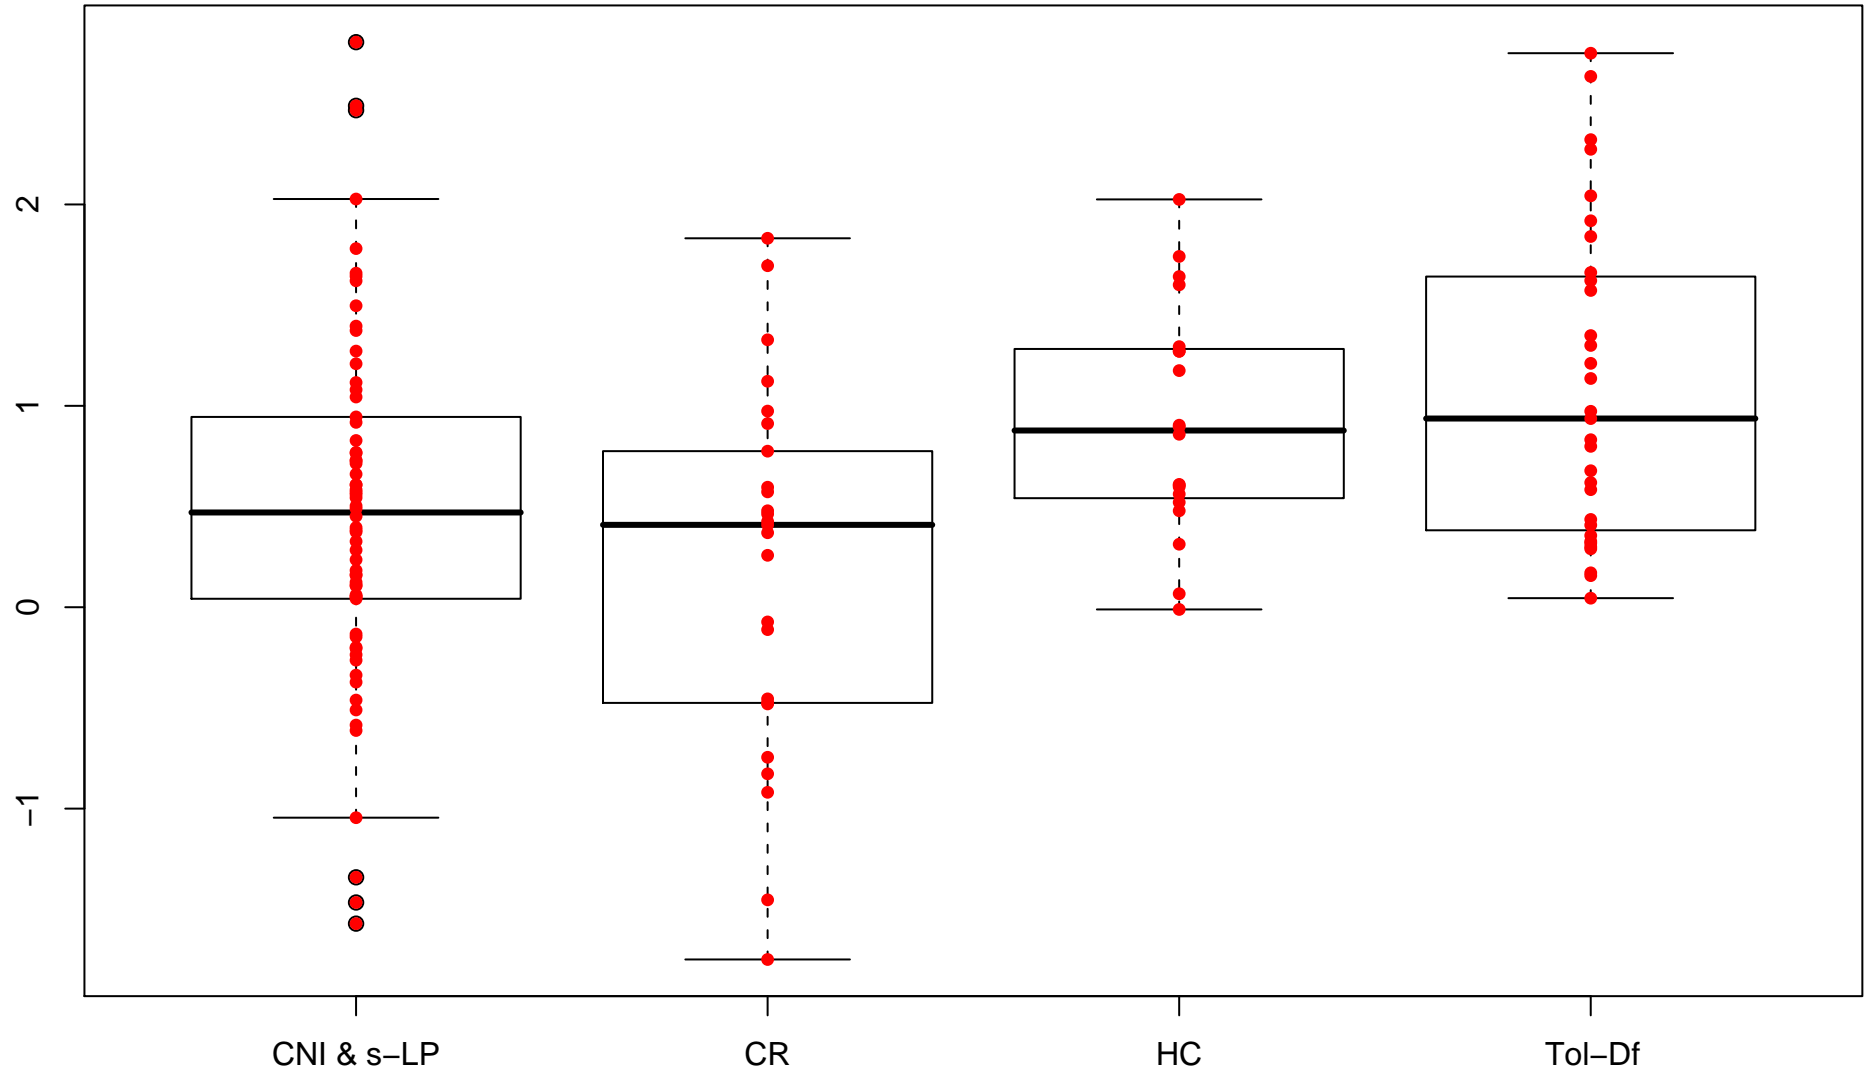



Rank 664 : PLEK2  
0.0007138

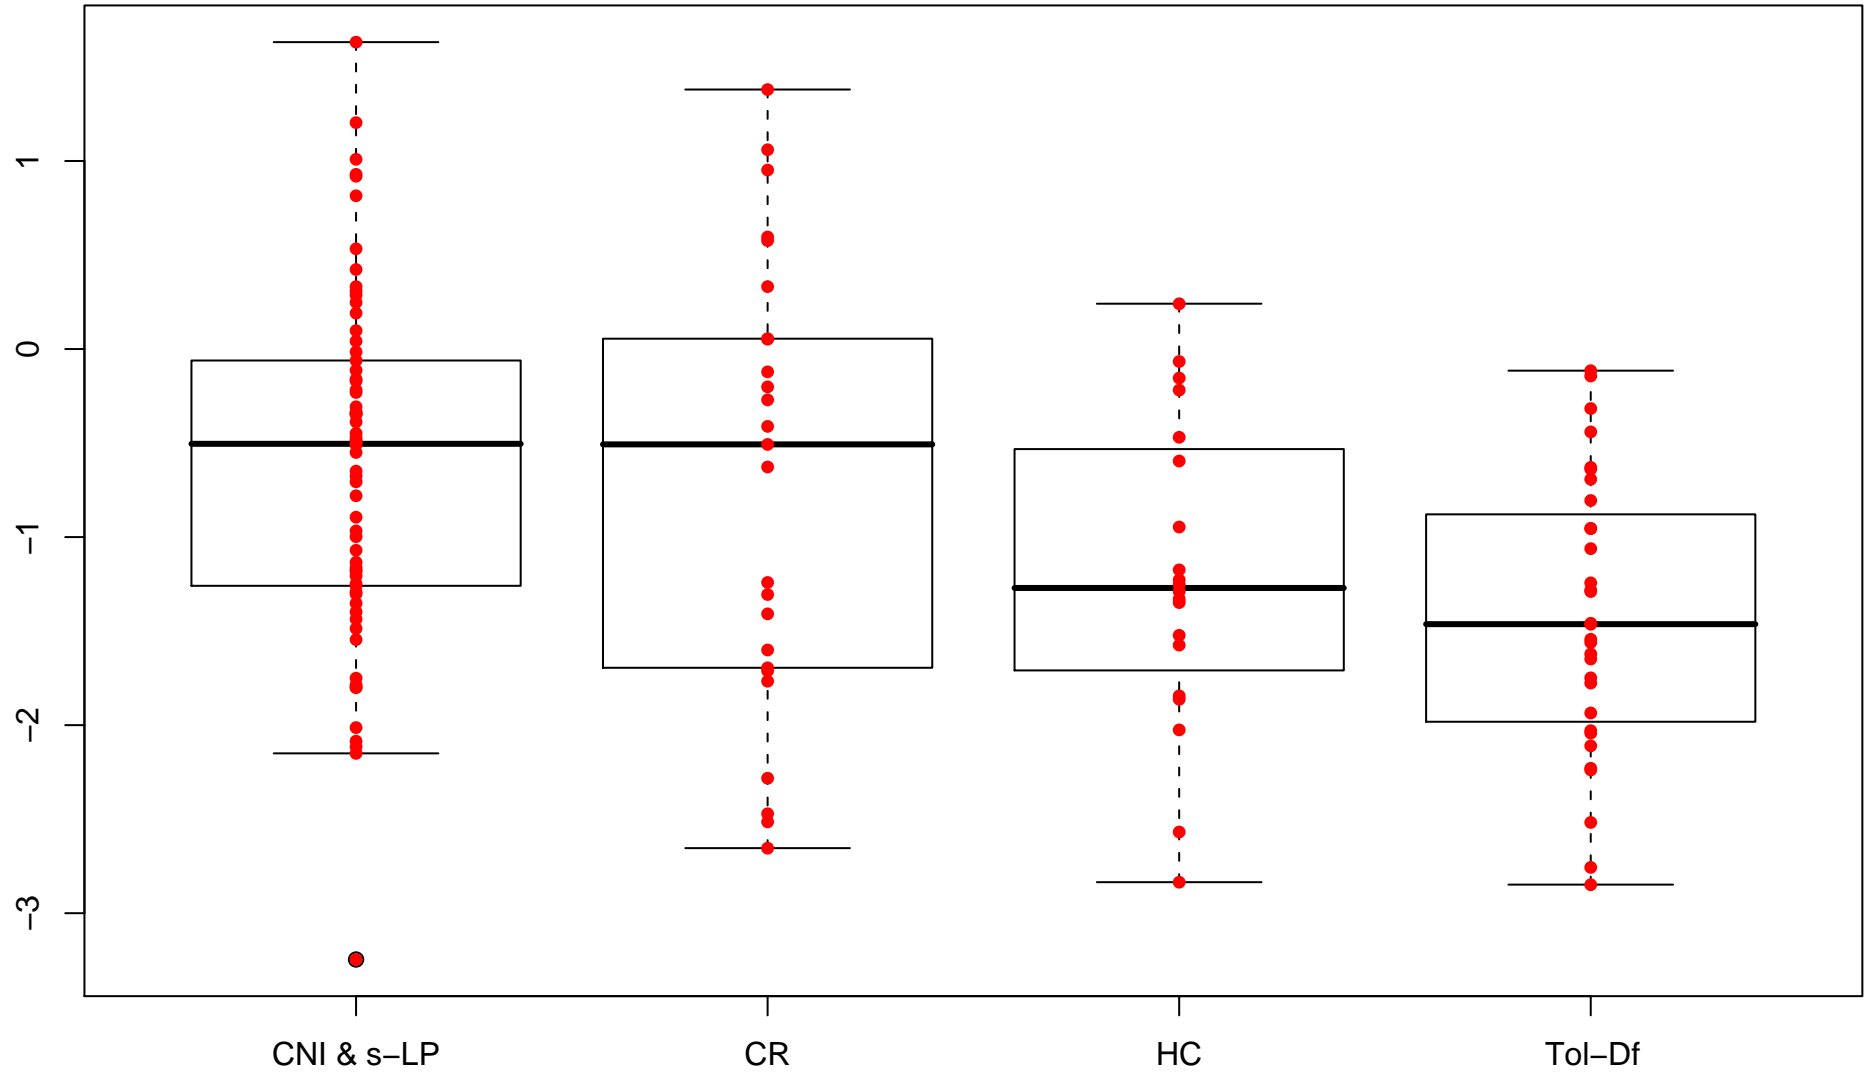

Rank 665 : LOC644186  
0.0007296

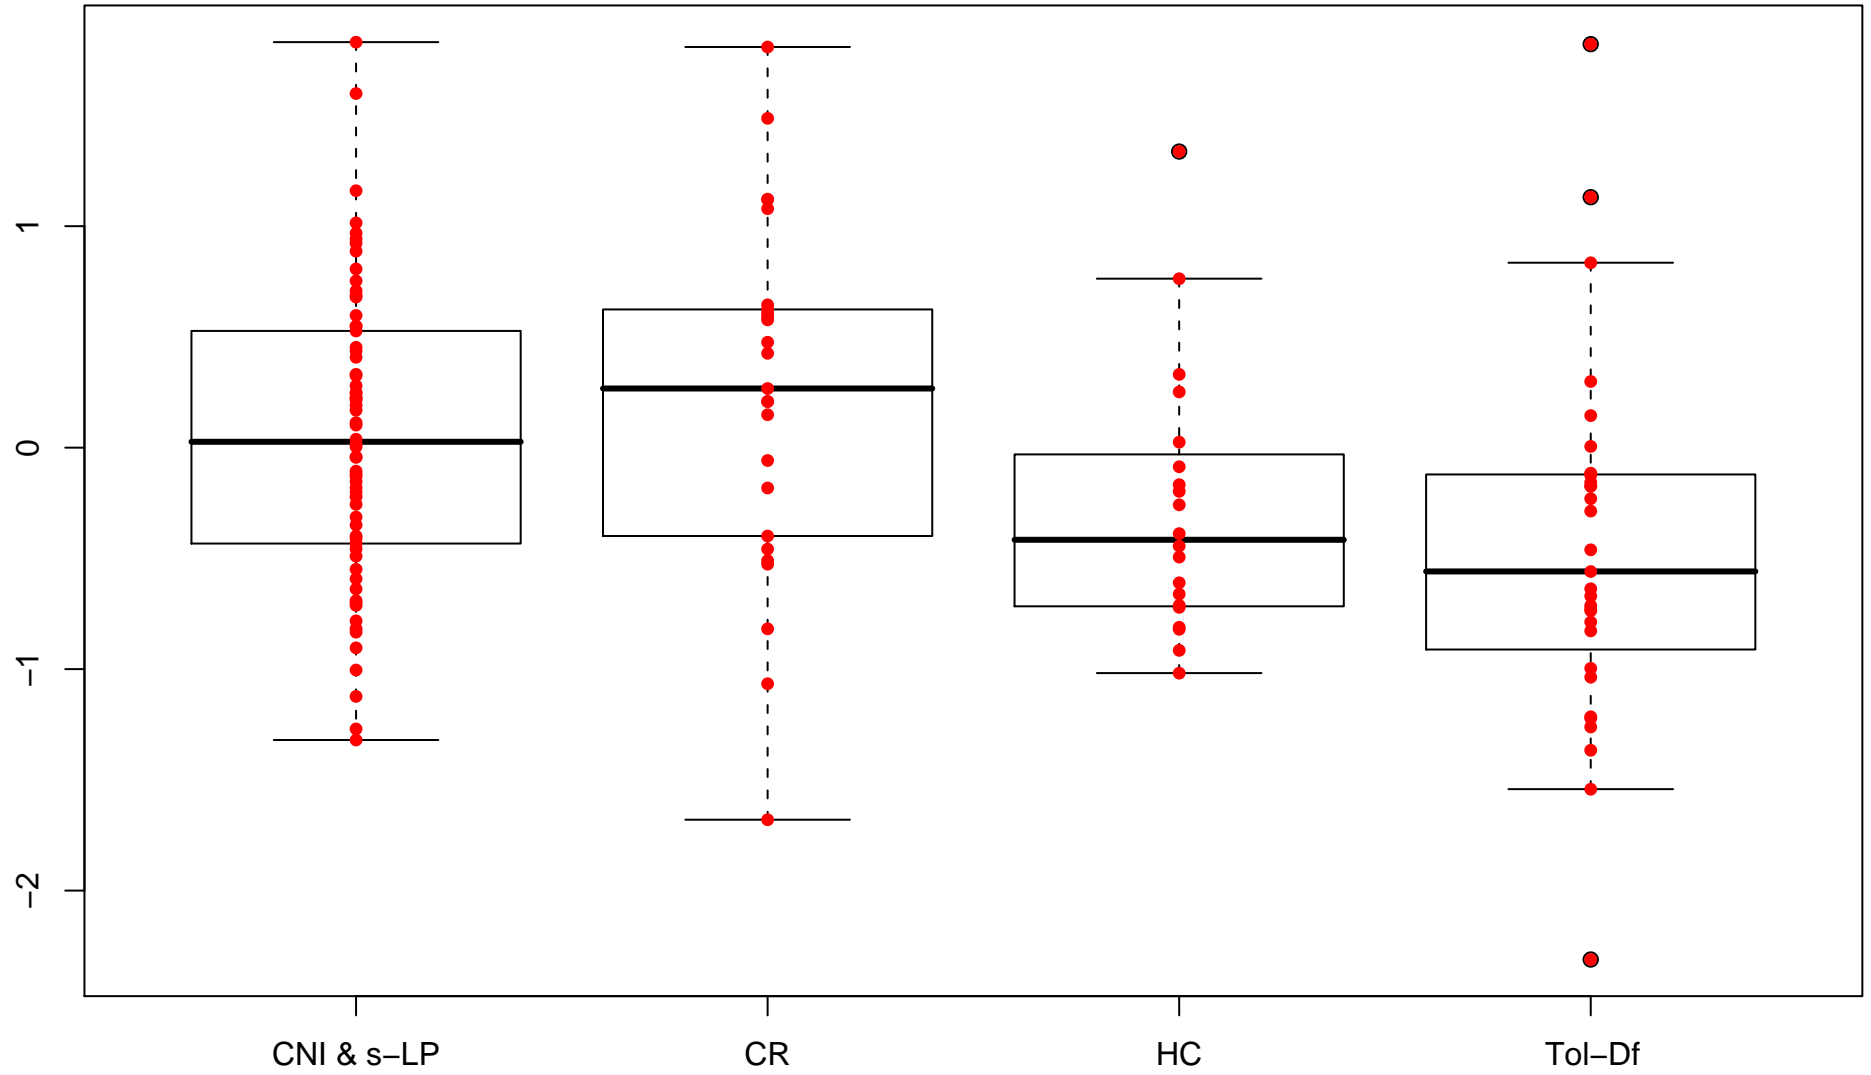

Rank 666 : MANSC1  
0.0007368

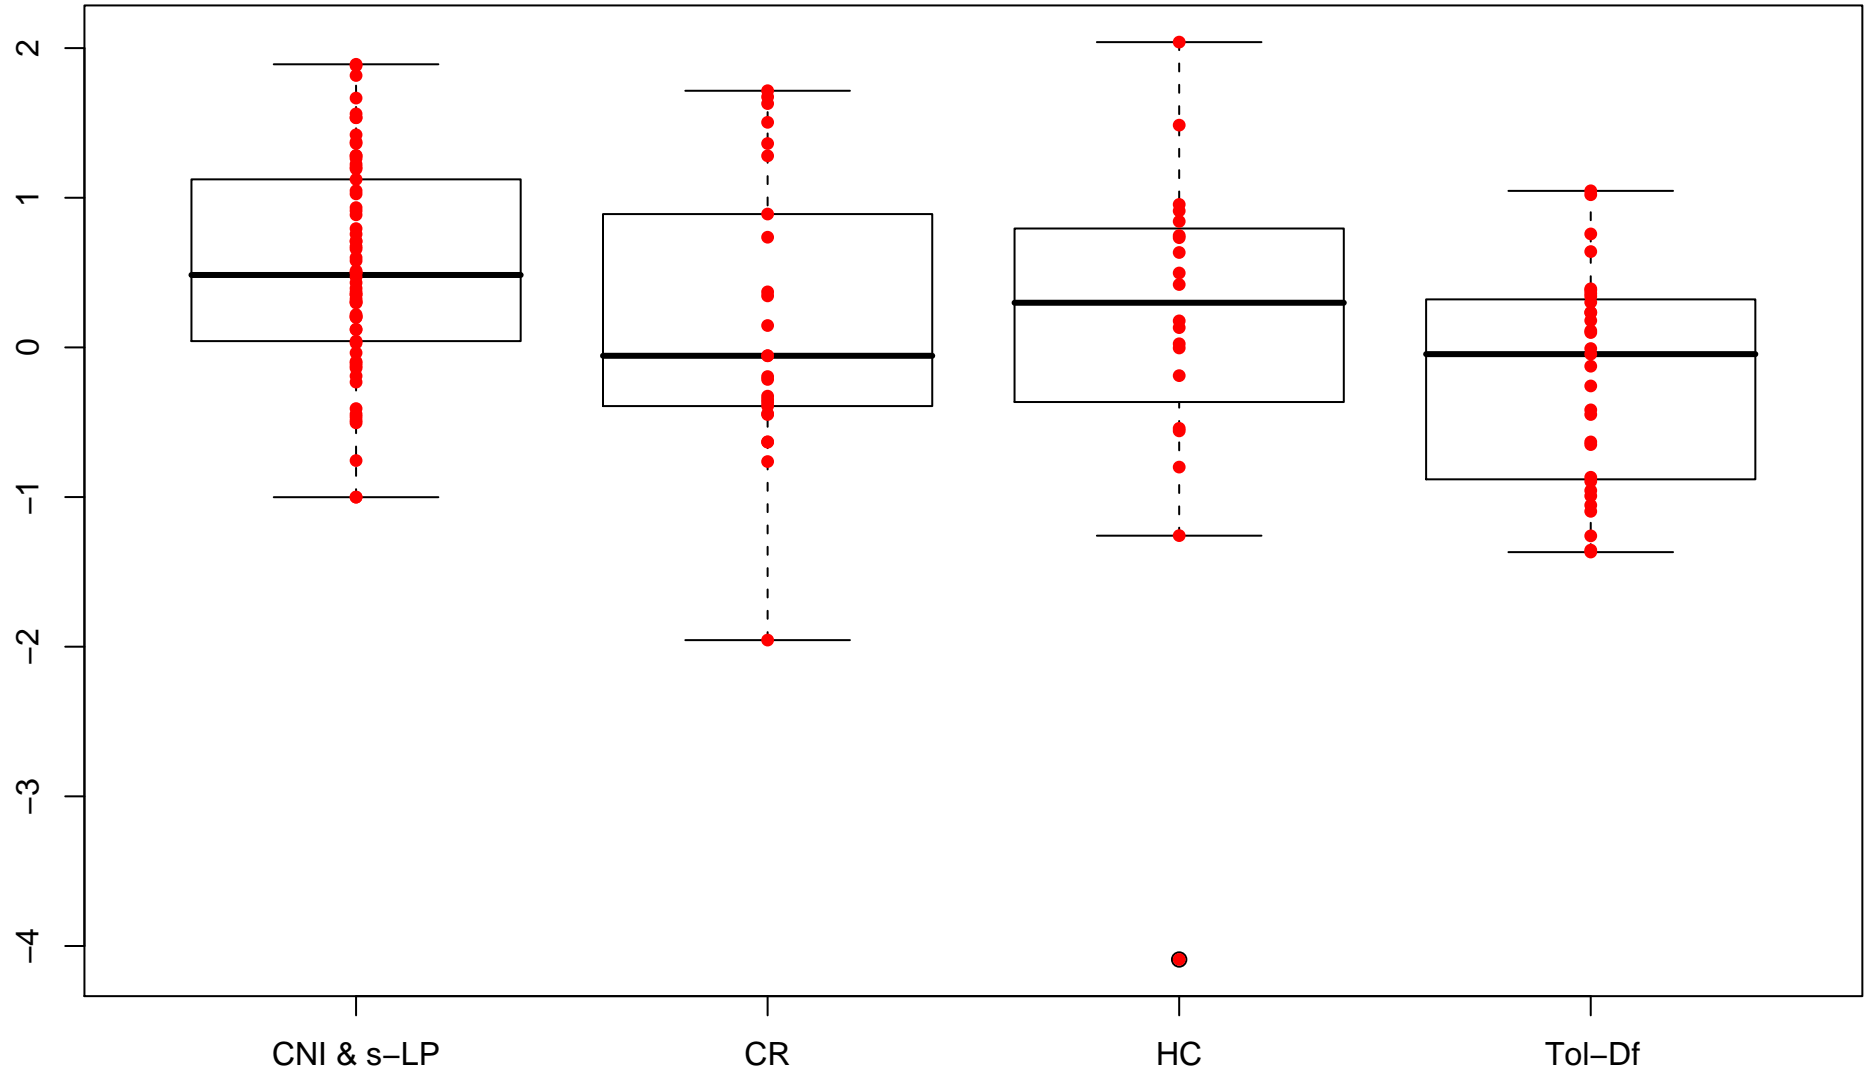

Rank 667 : MMP9  
0.0007403

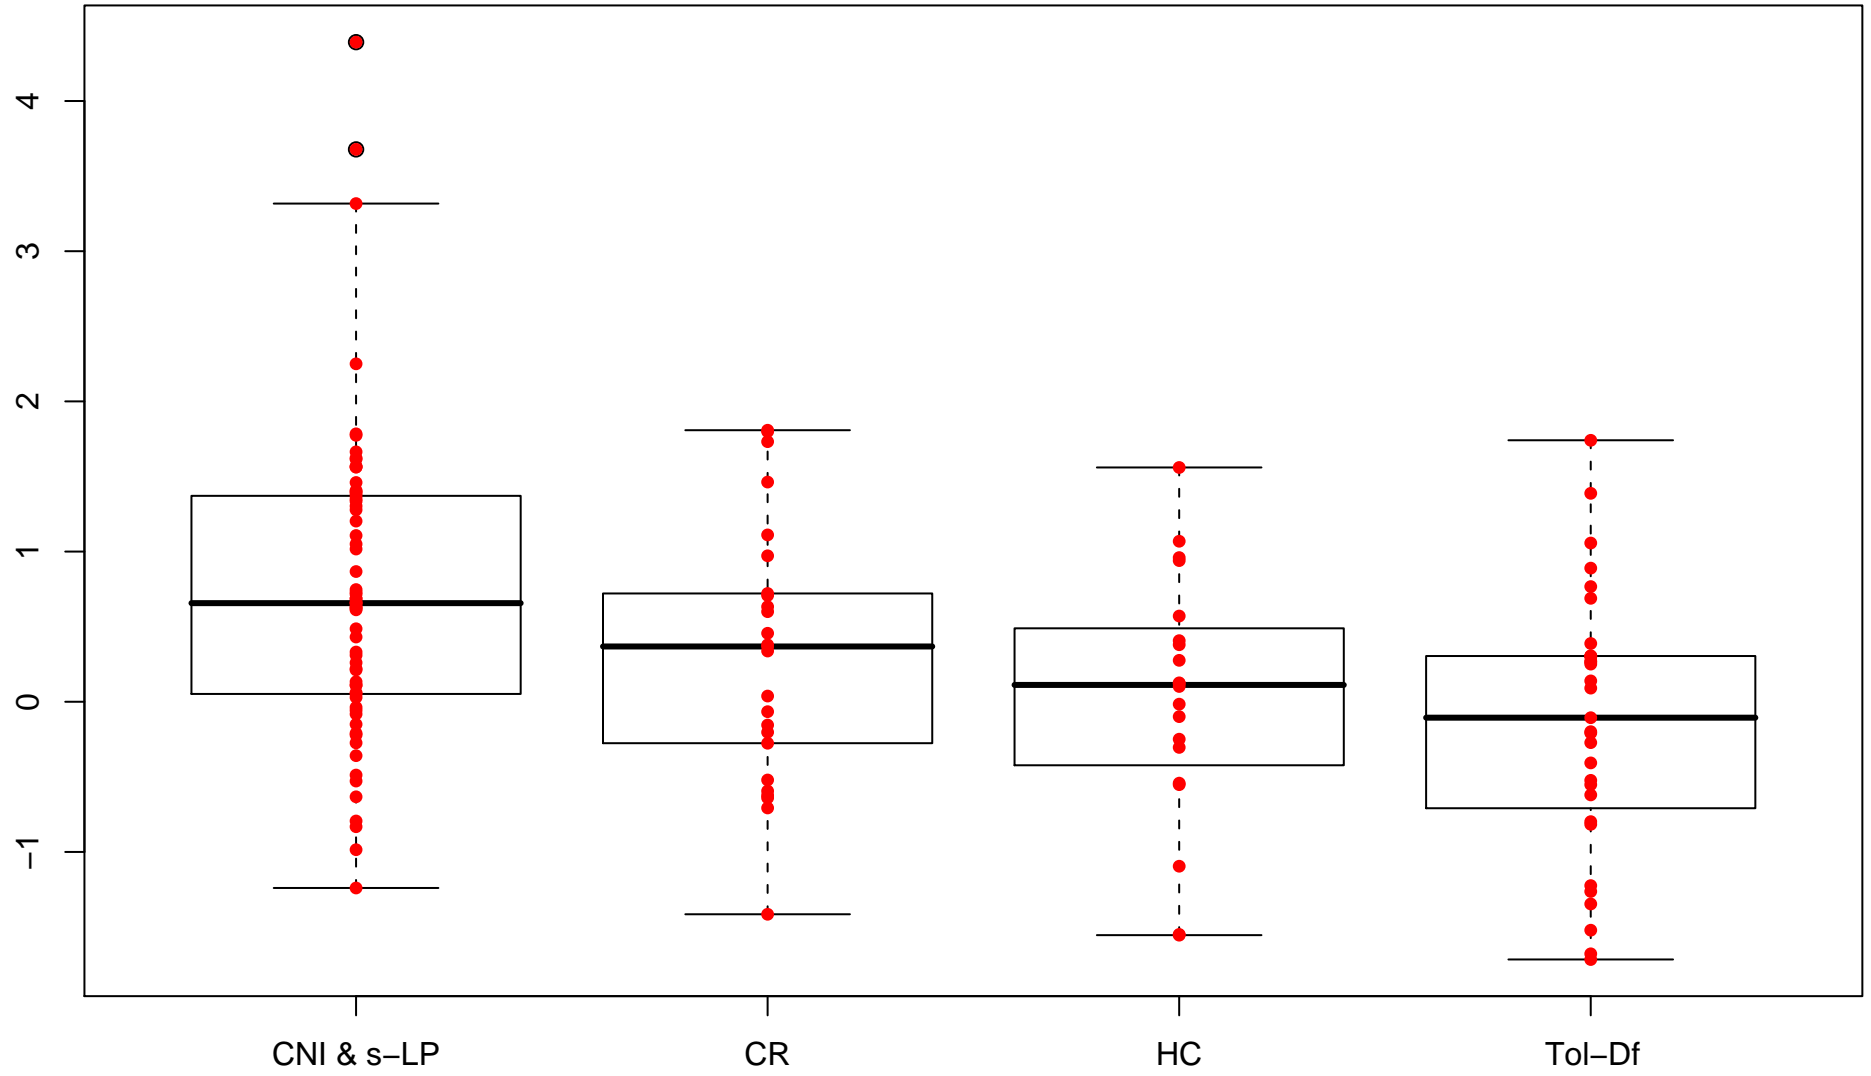

Rank 668 : SLC10A4  
0.0007413

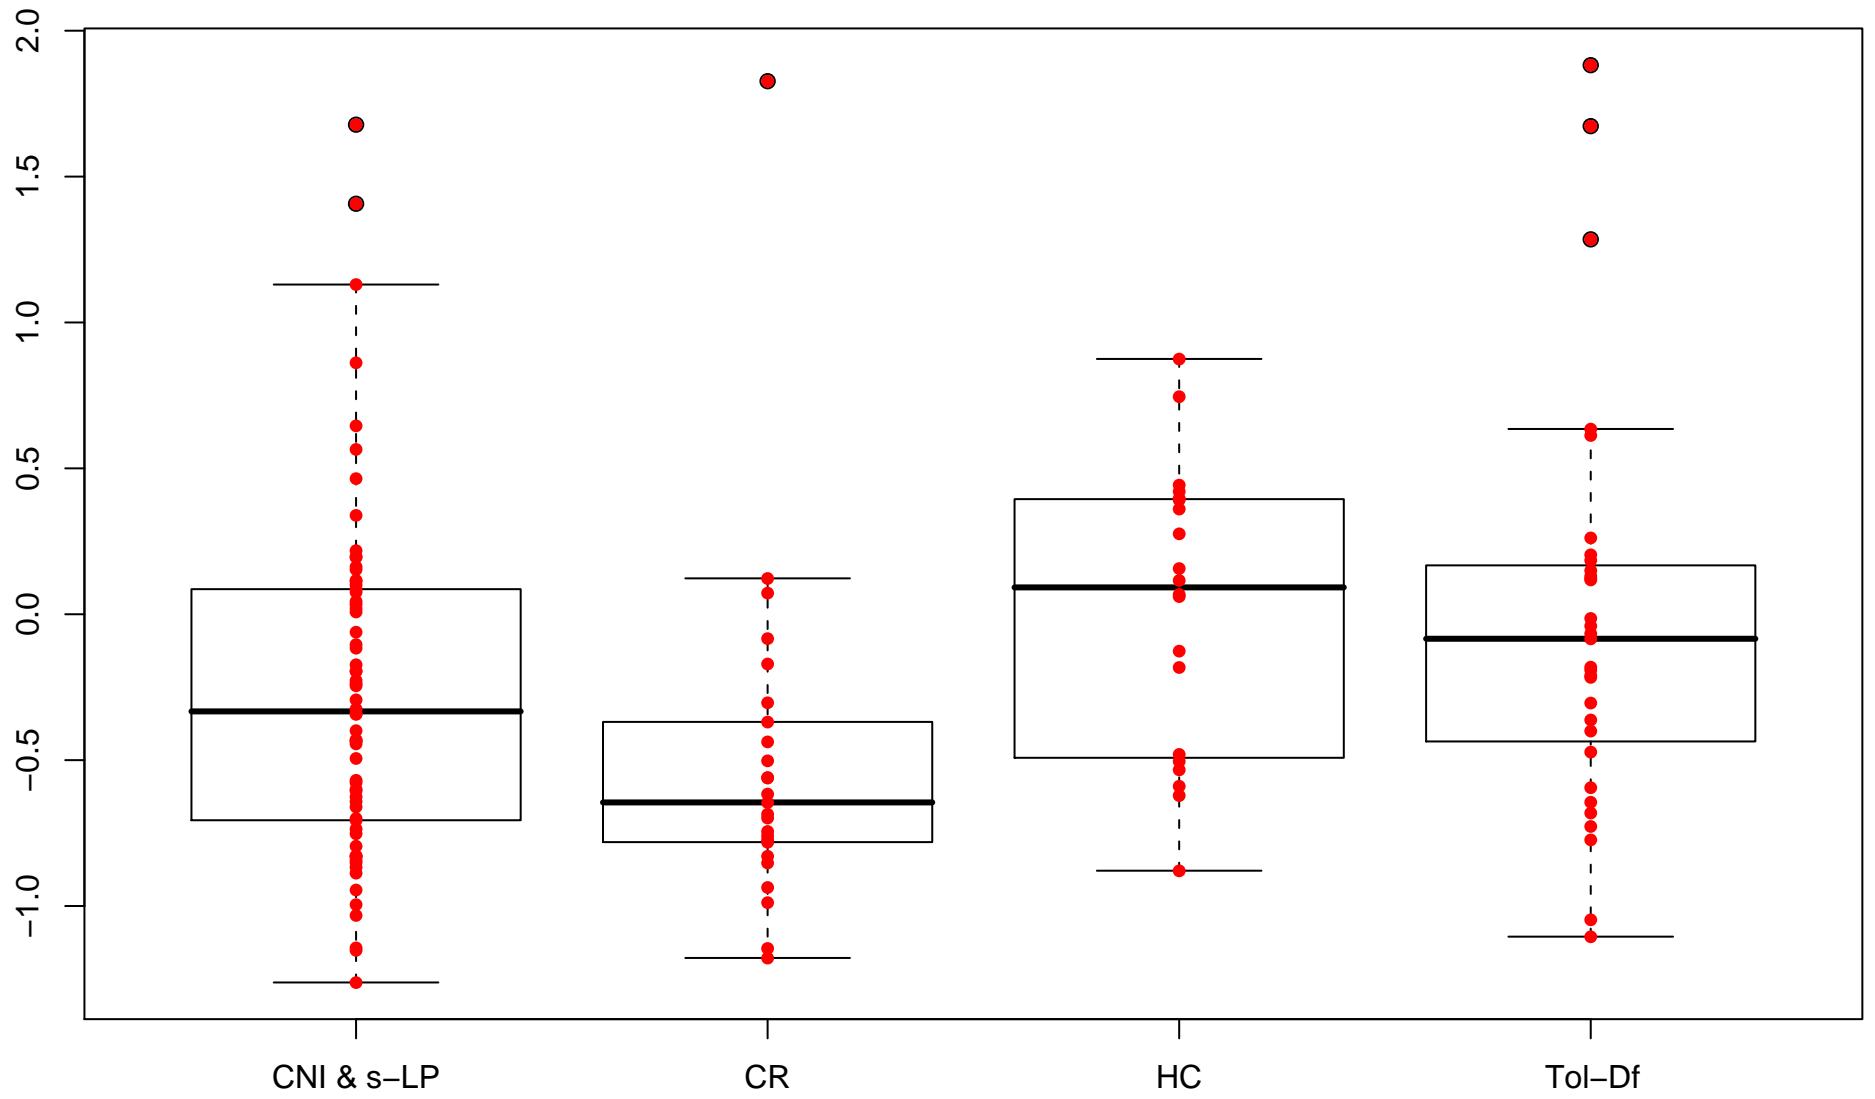

Rank 669 : KIF14  
0.0007415

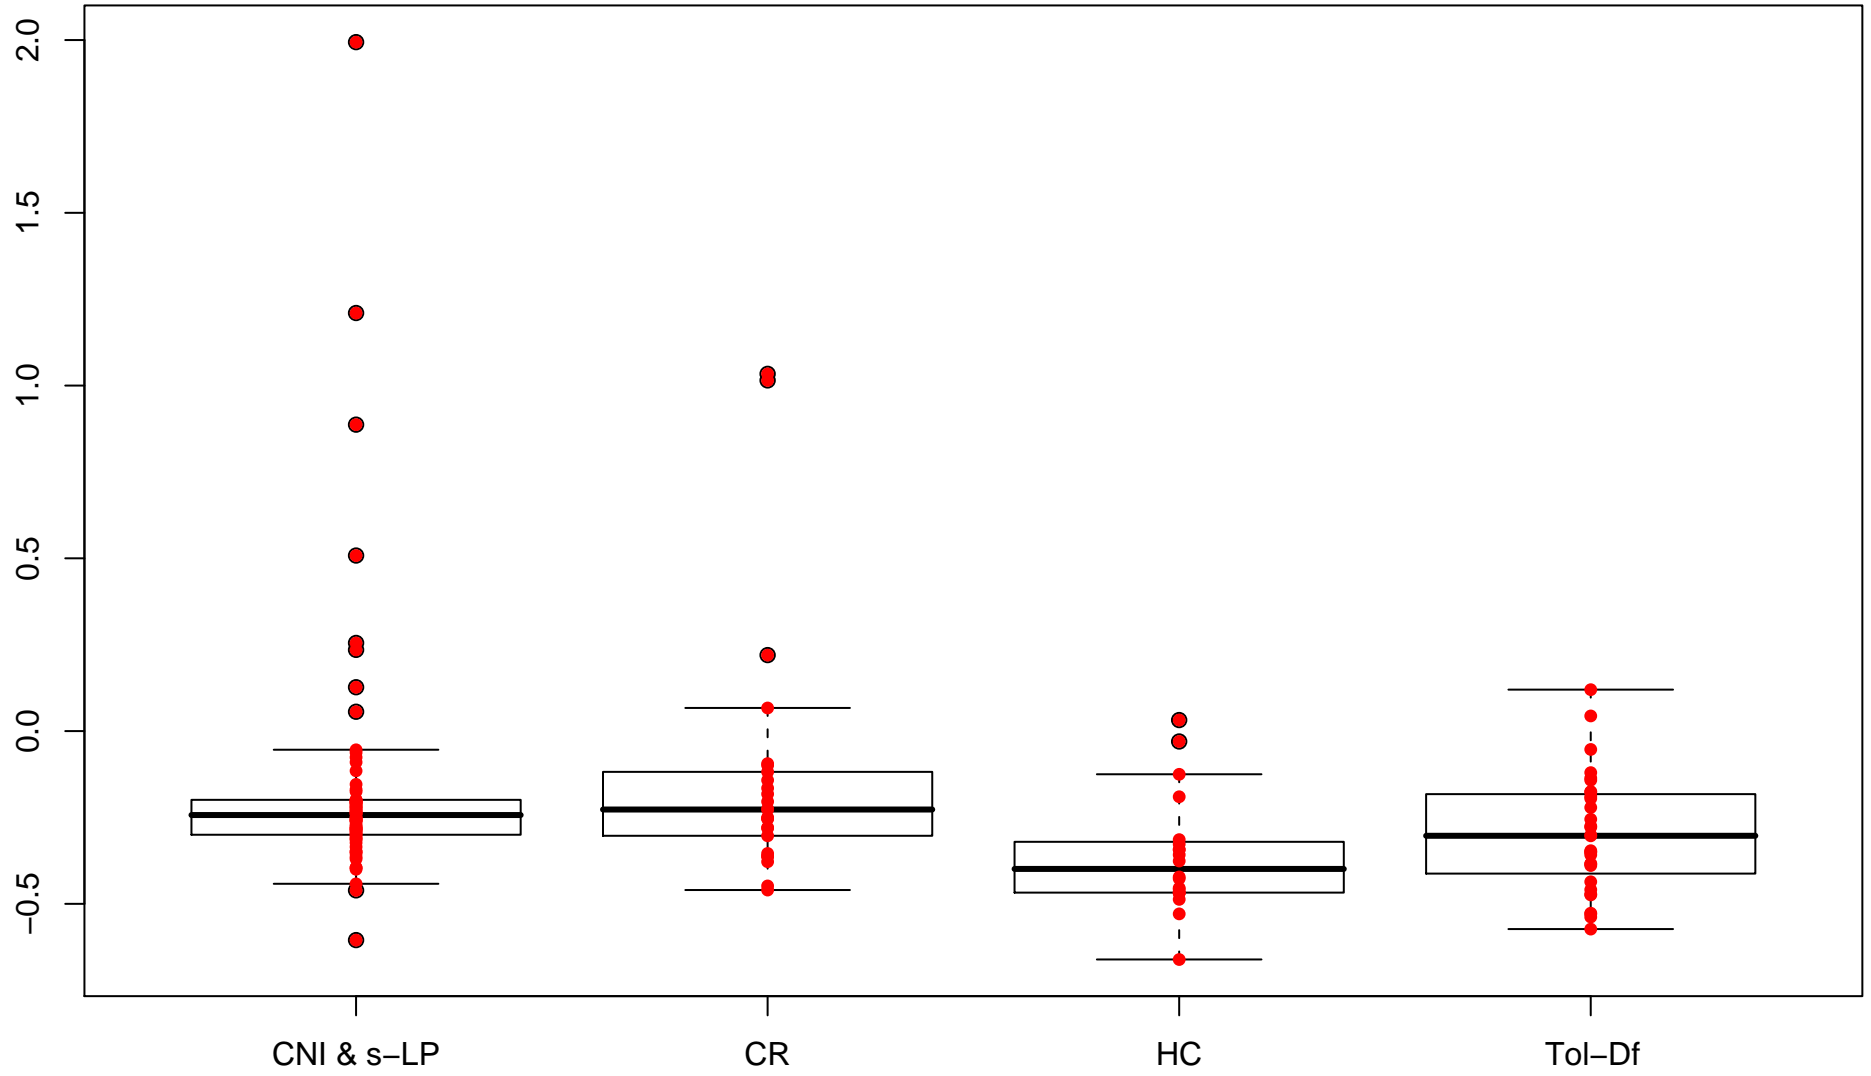

Rank 670 : ORAI3  
0.0007494

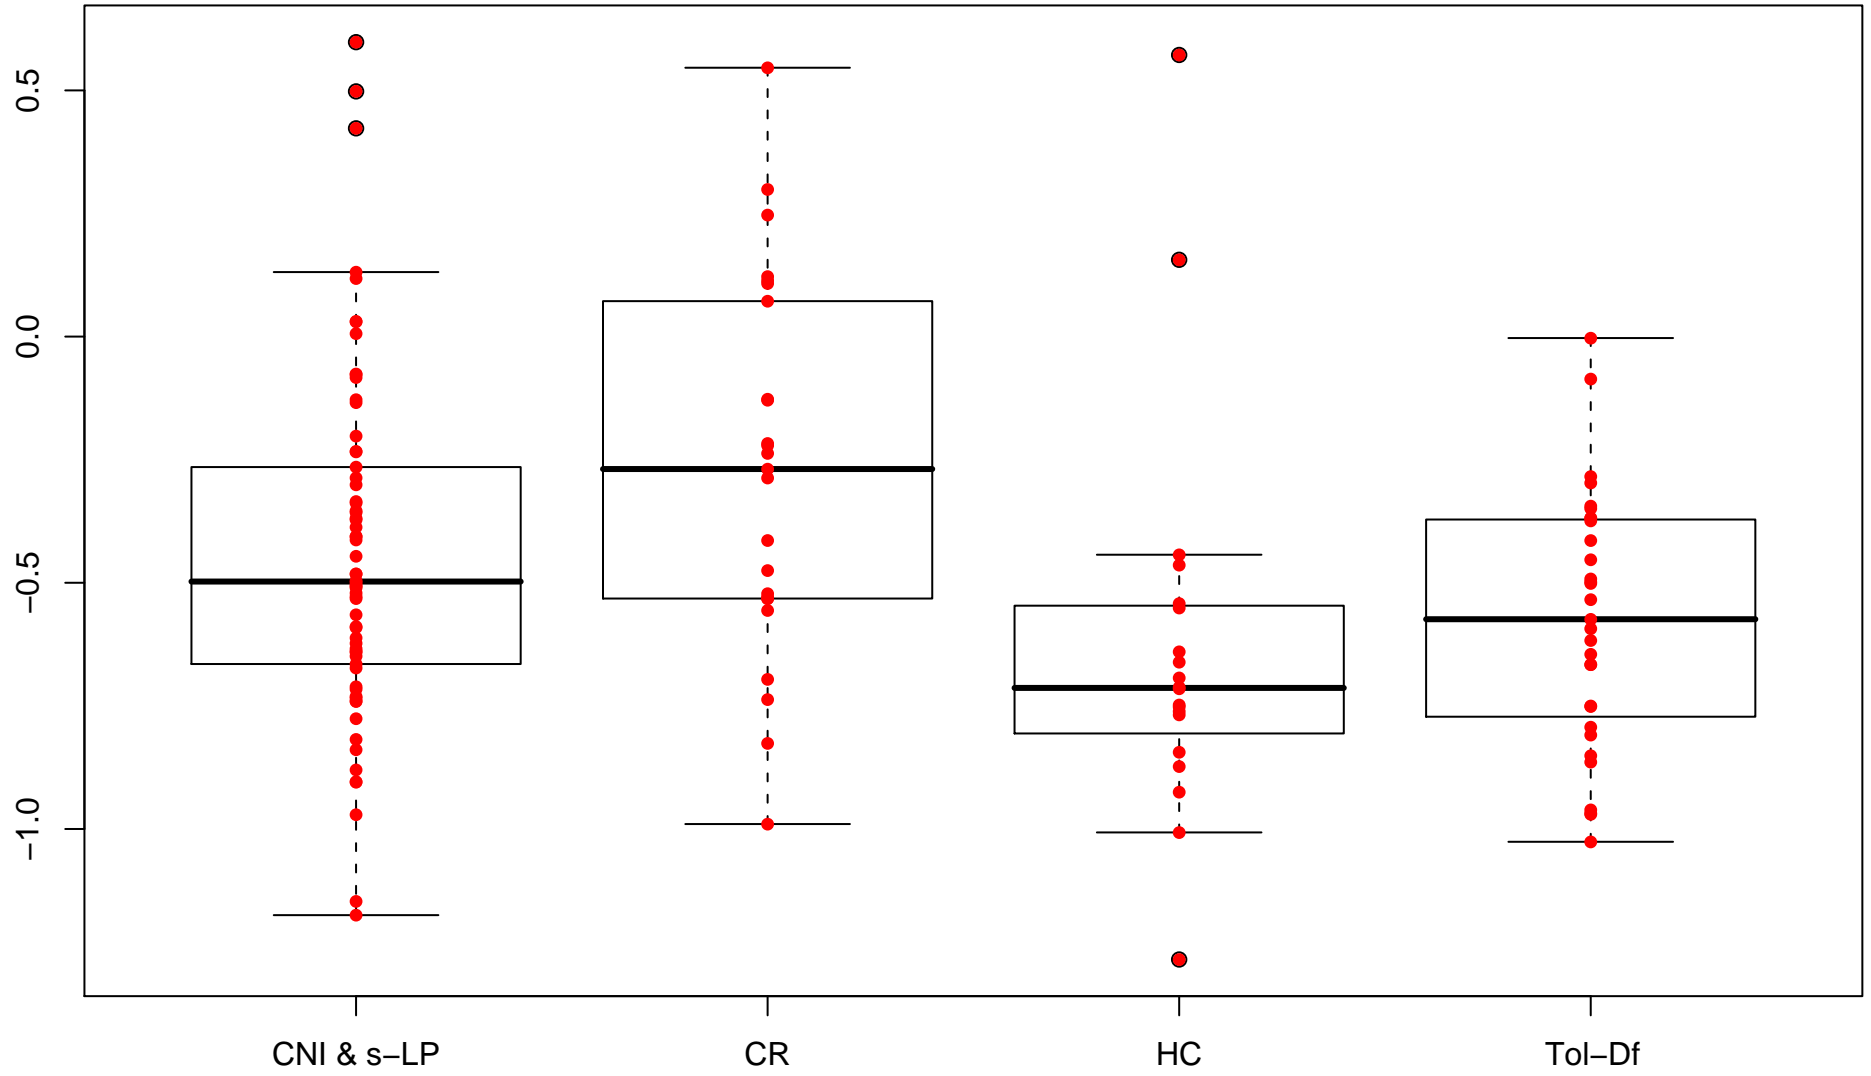

Rank 671 : PSMD7  
0.0007525

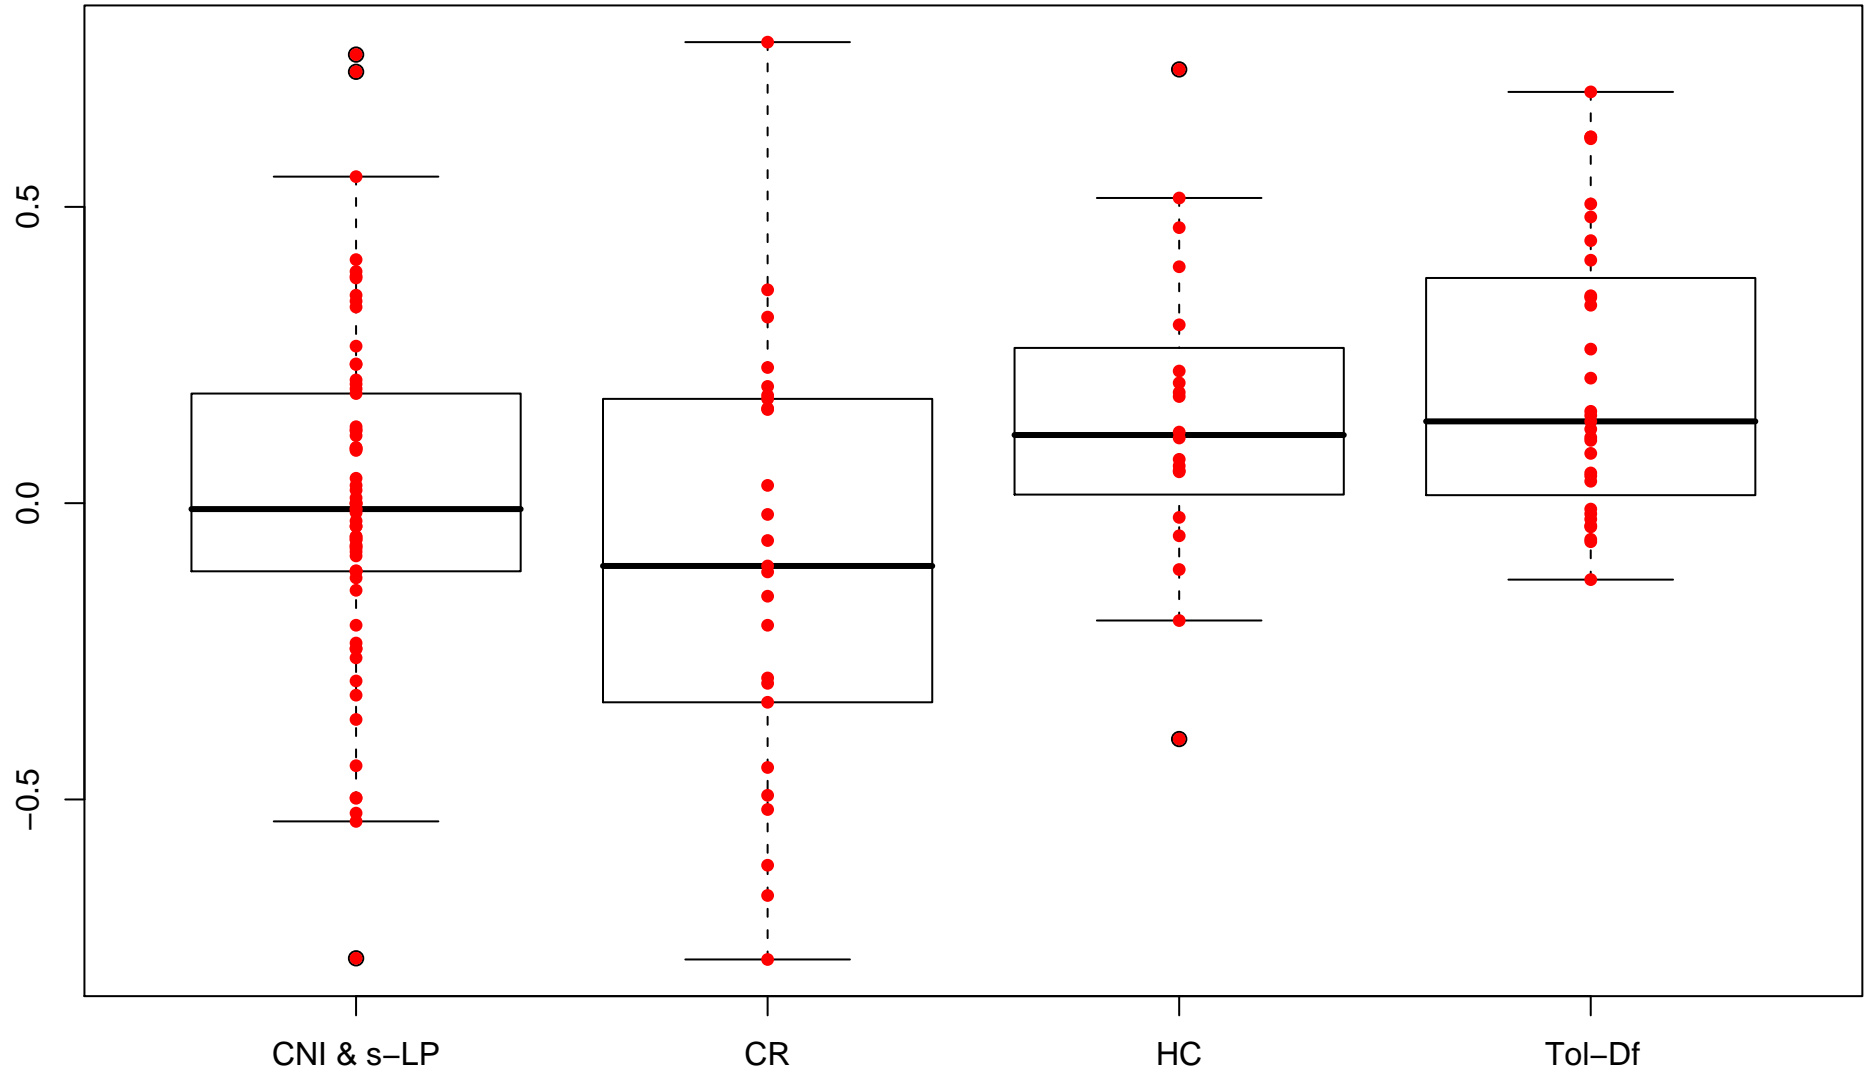



Rank 672 : ZNF227;ZNF235  
0.0007564

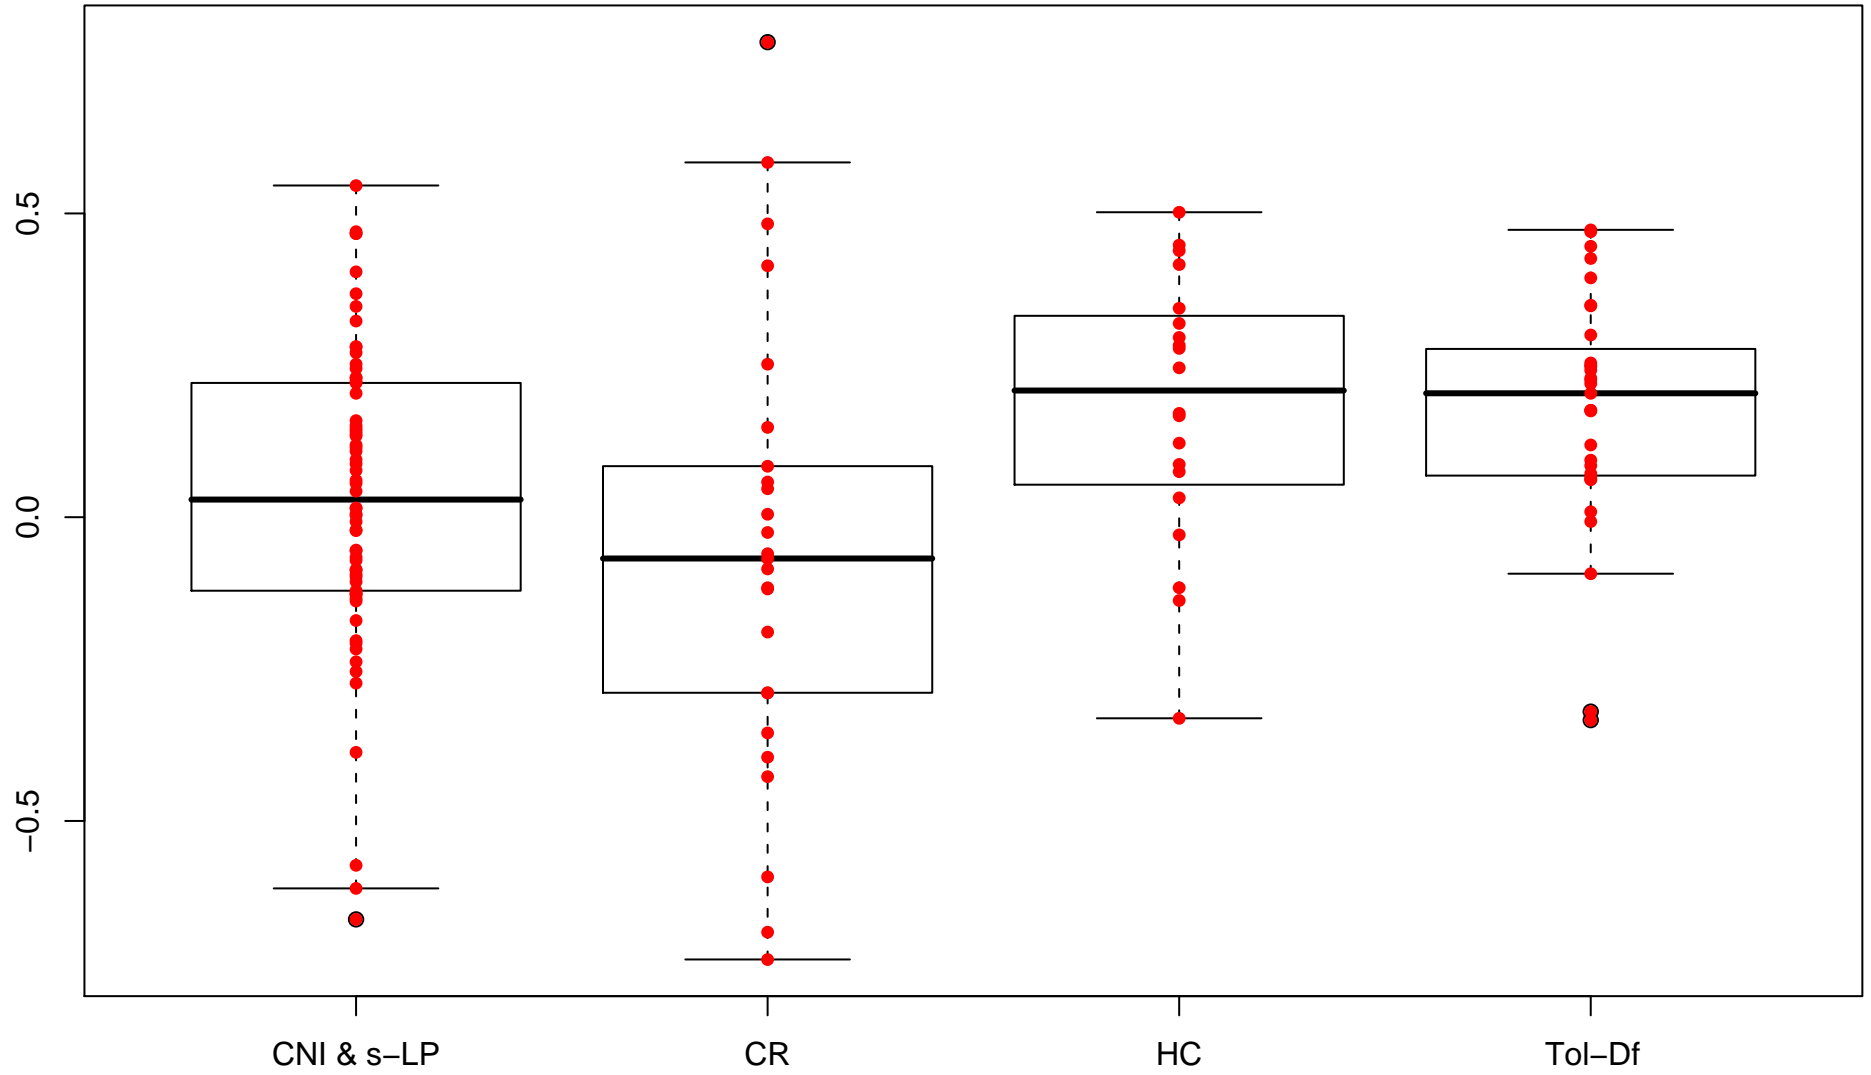

Rank 673 : REEP3  
0.000759

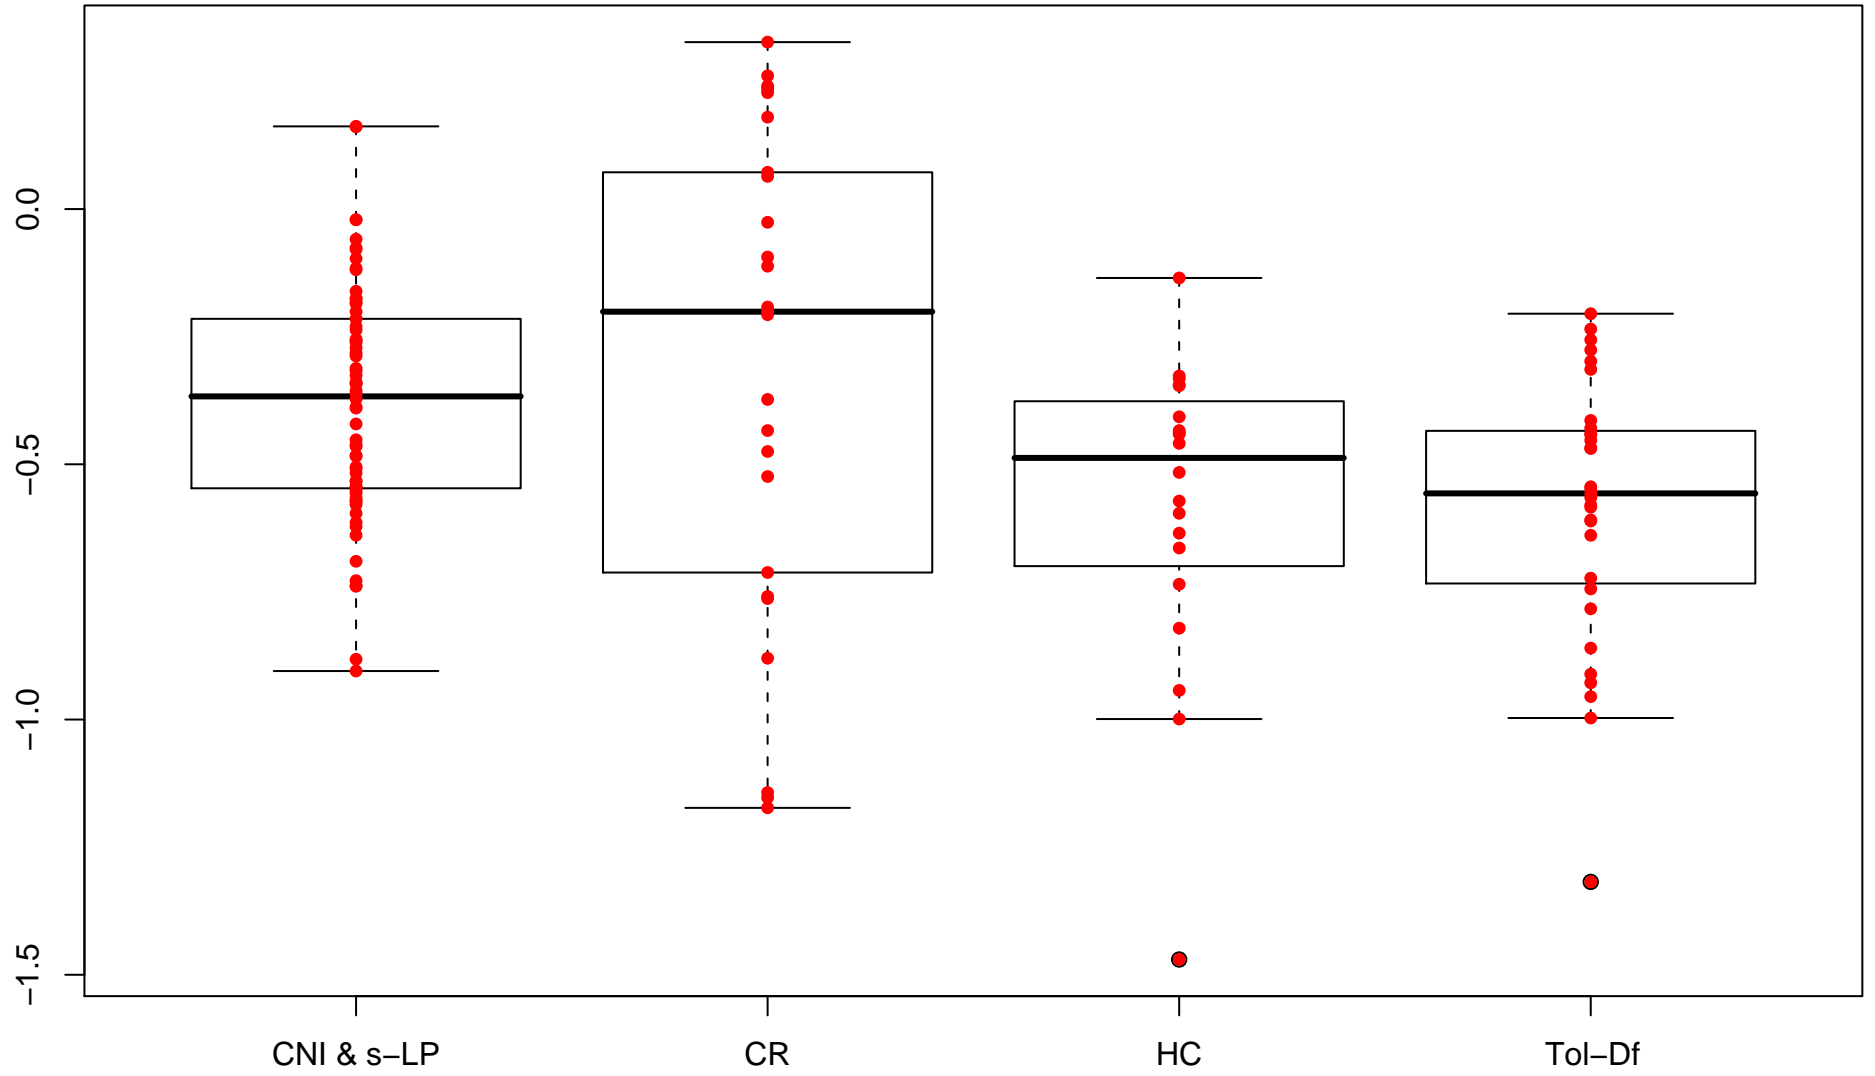

Rank 674 : PDCD2  
0.000761

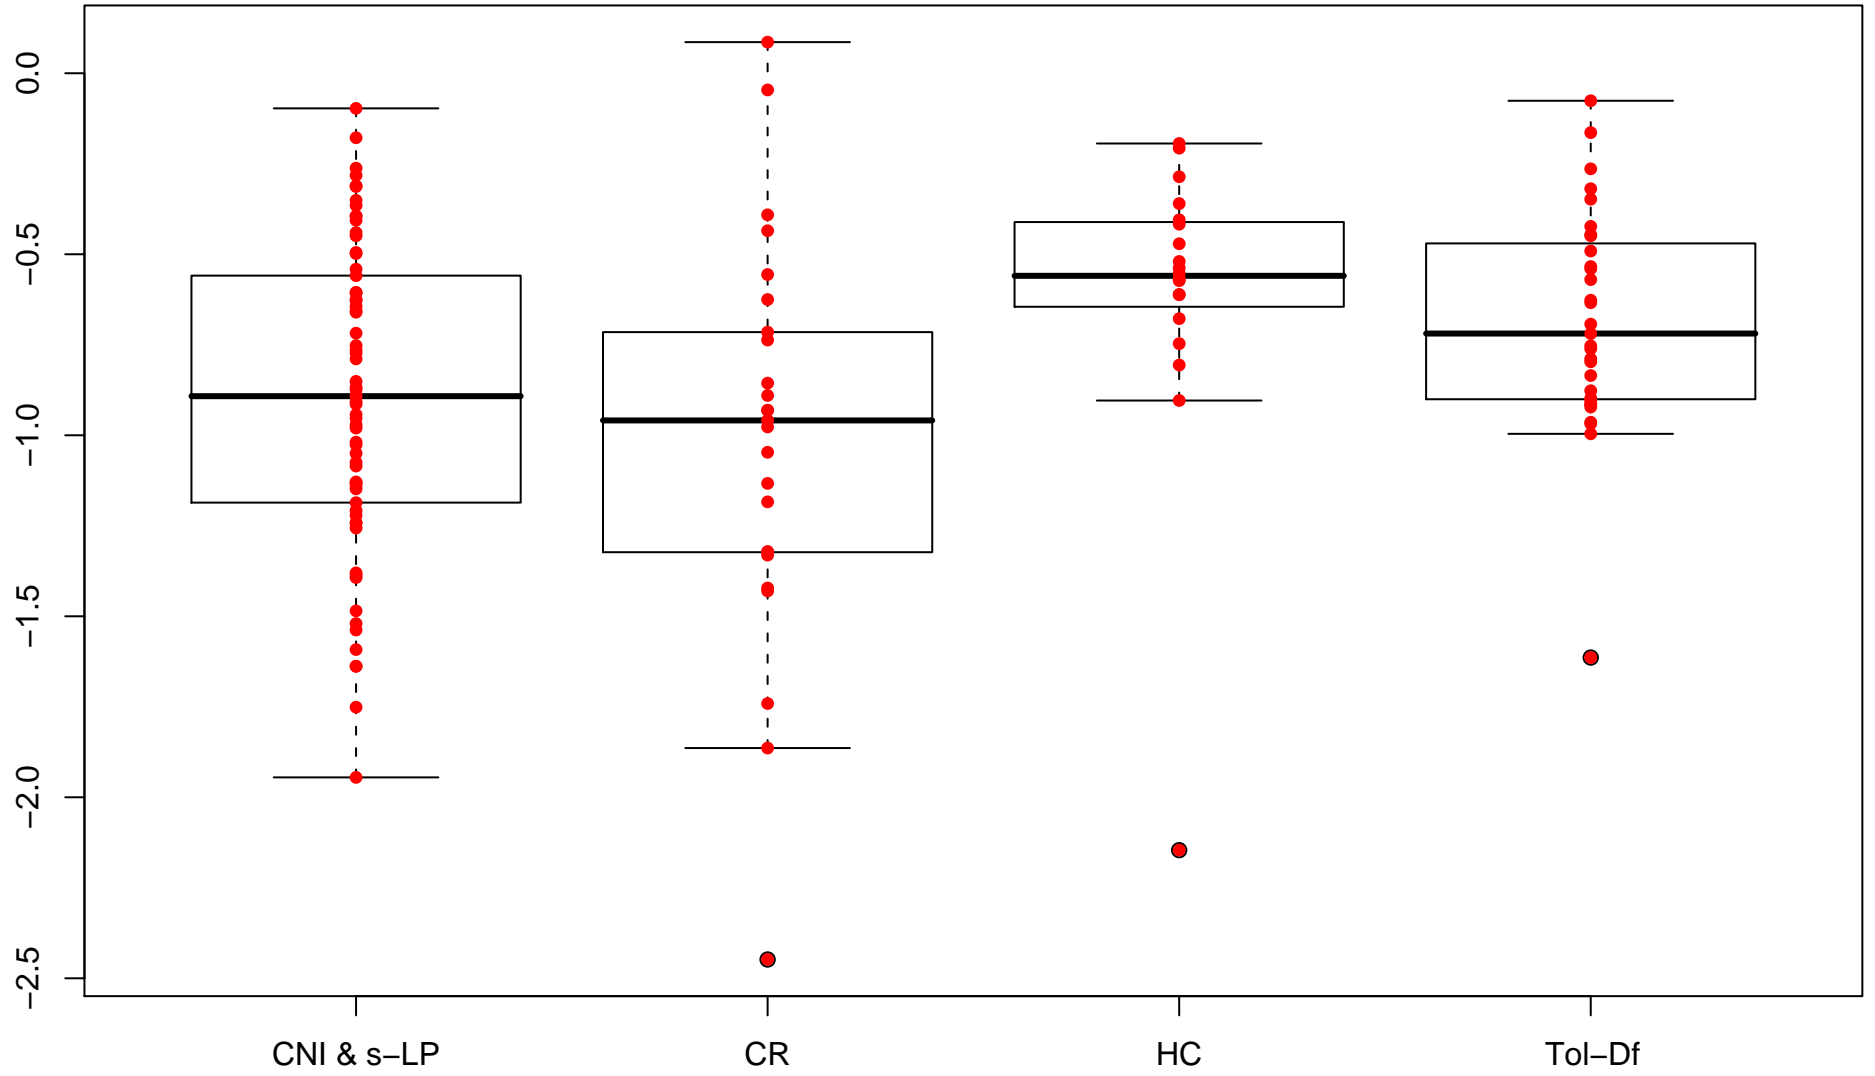

Rank 675 : RPAP3  
0.0007627

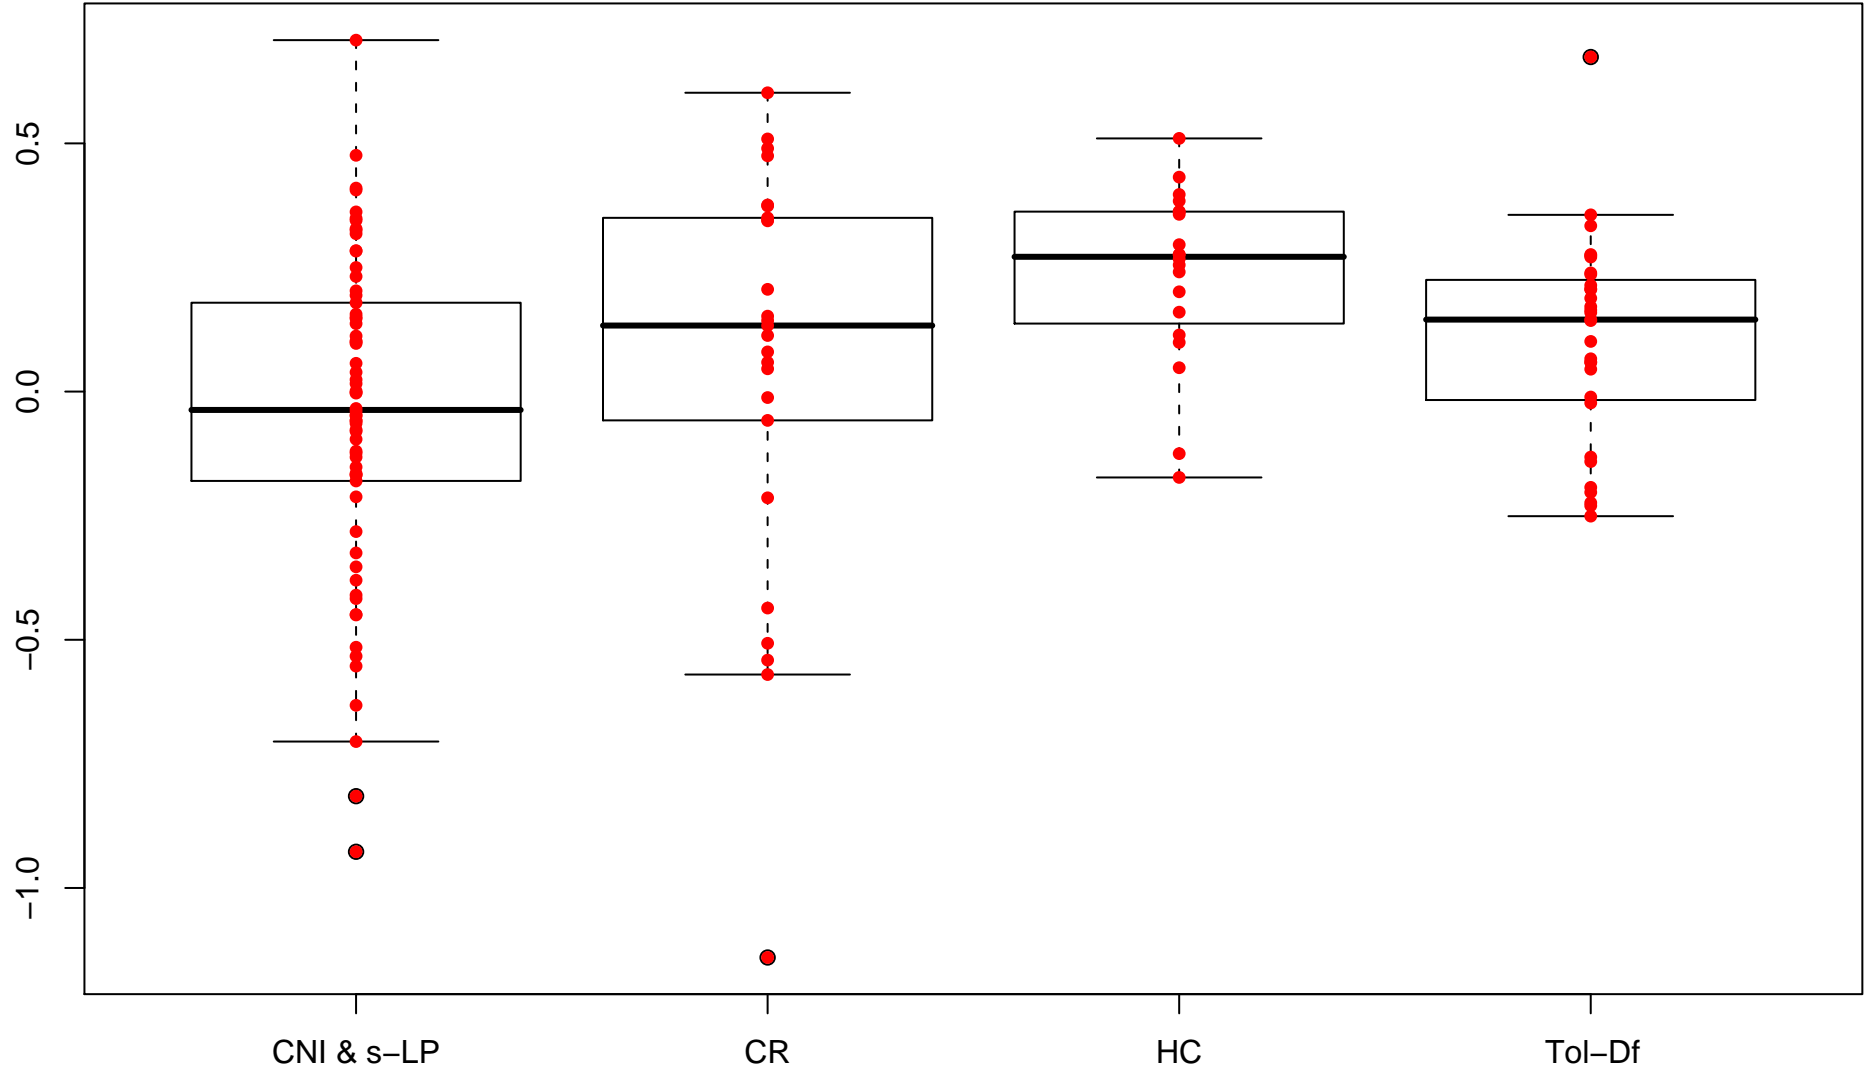

Rank 676 : LOC643641;SSPO  
0.0007629

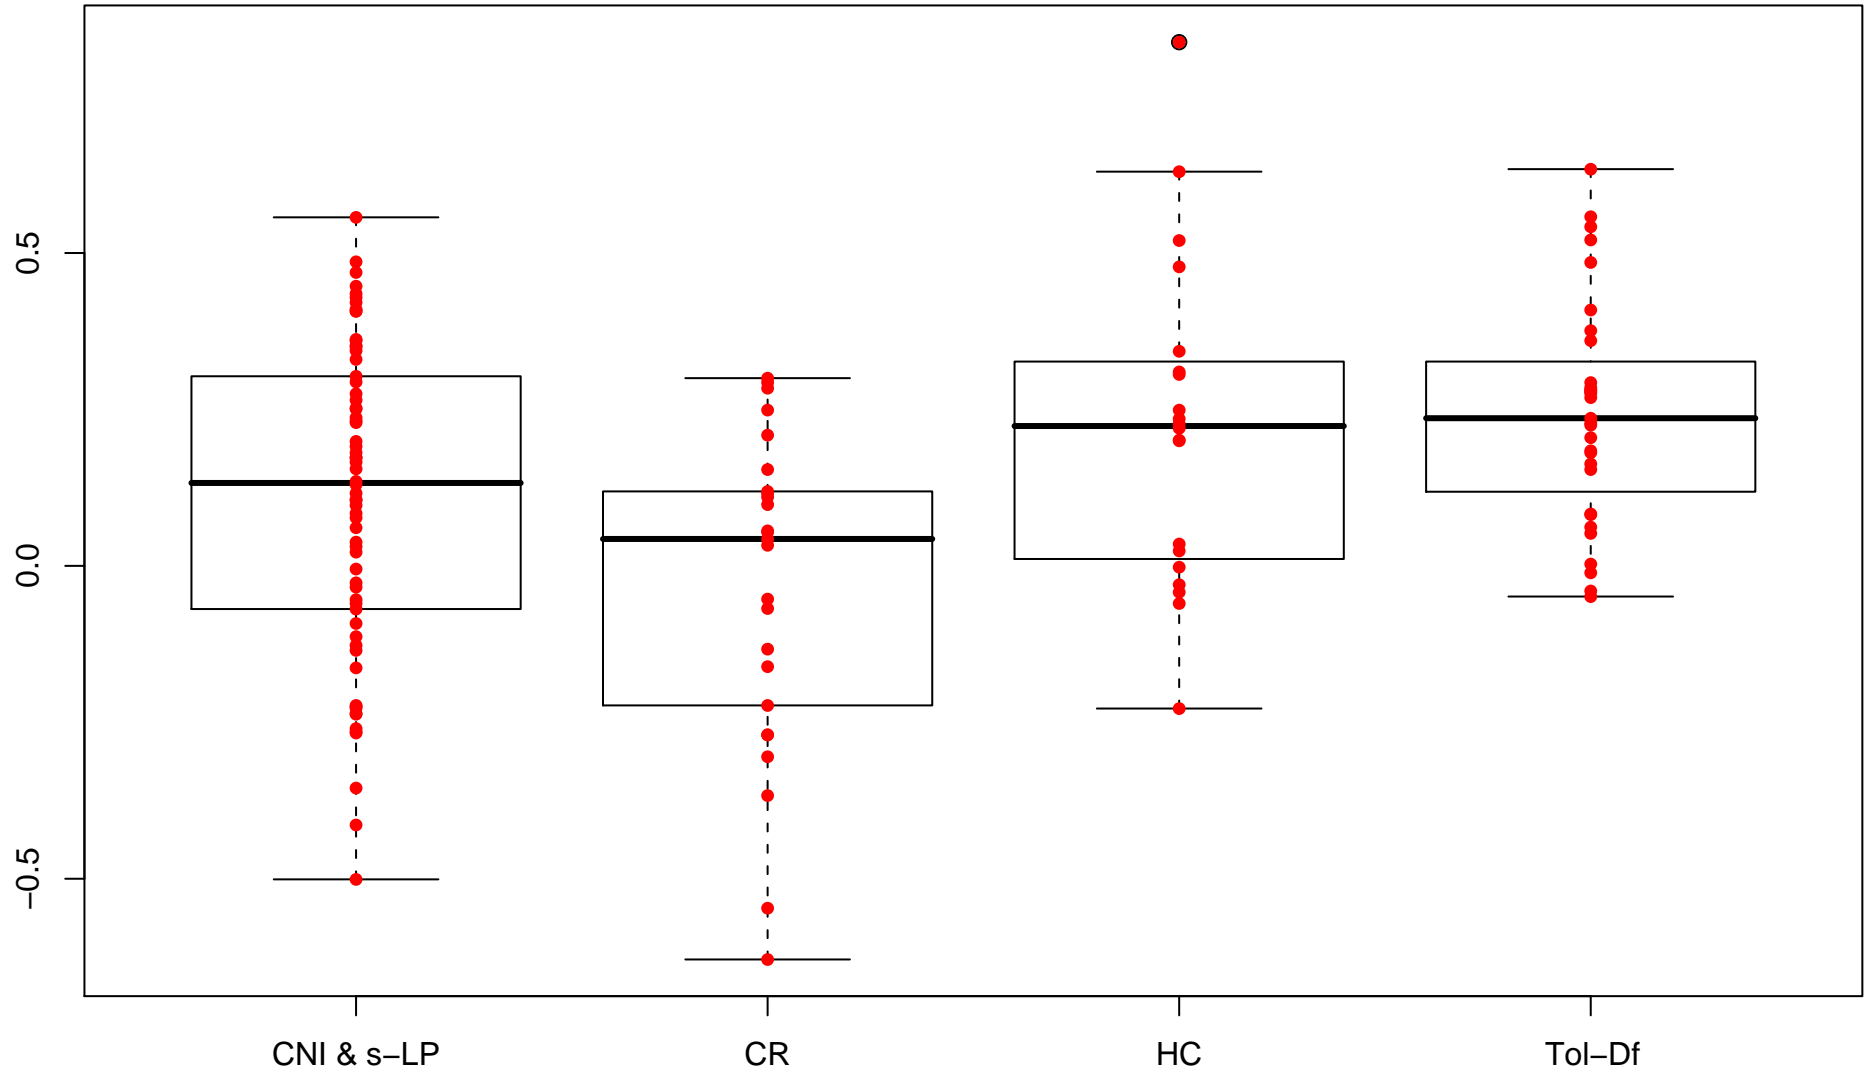

Rank 677 : CHMP1A  
0.0007698

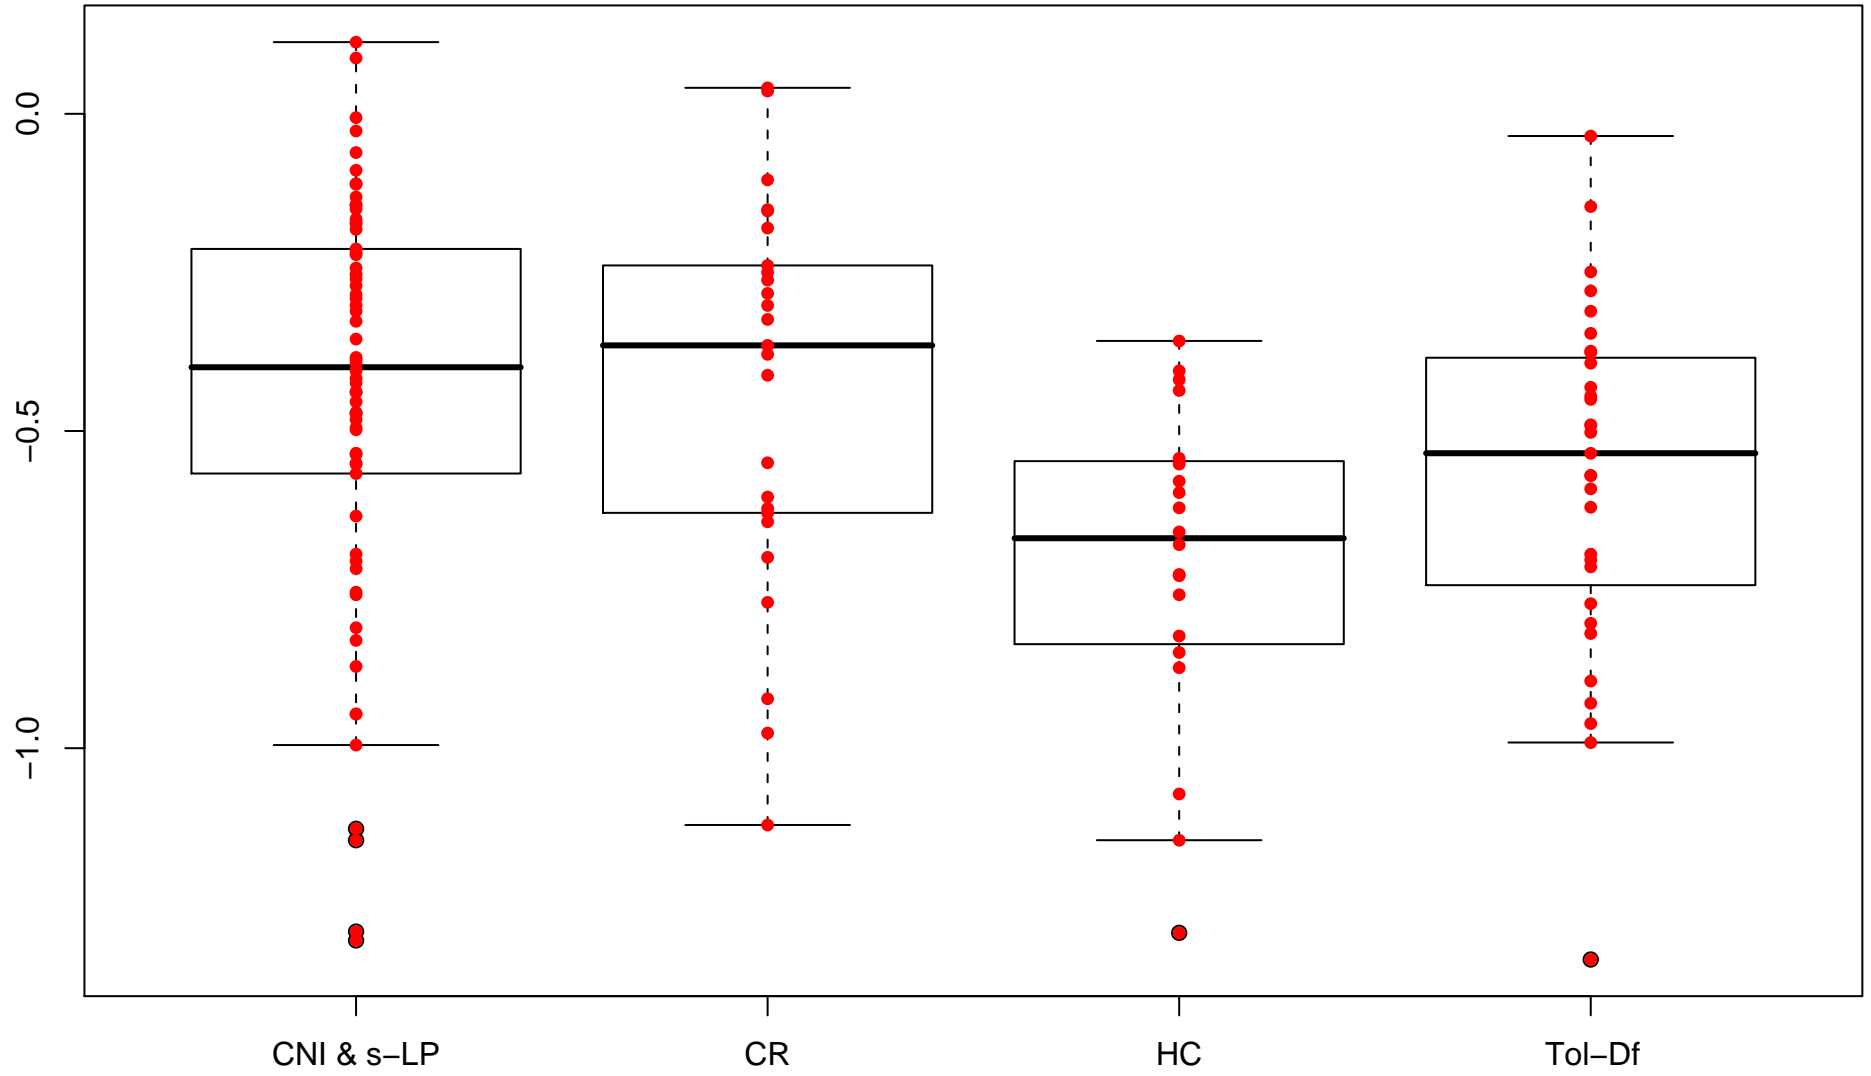

Rank 678 : RBL2  
0.0007702

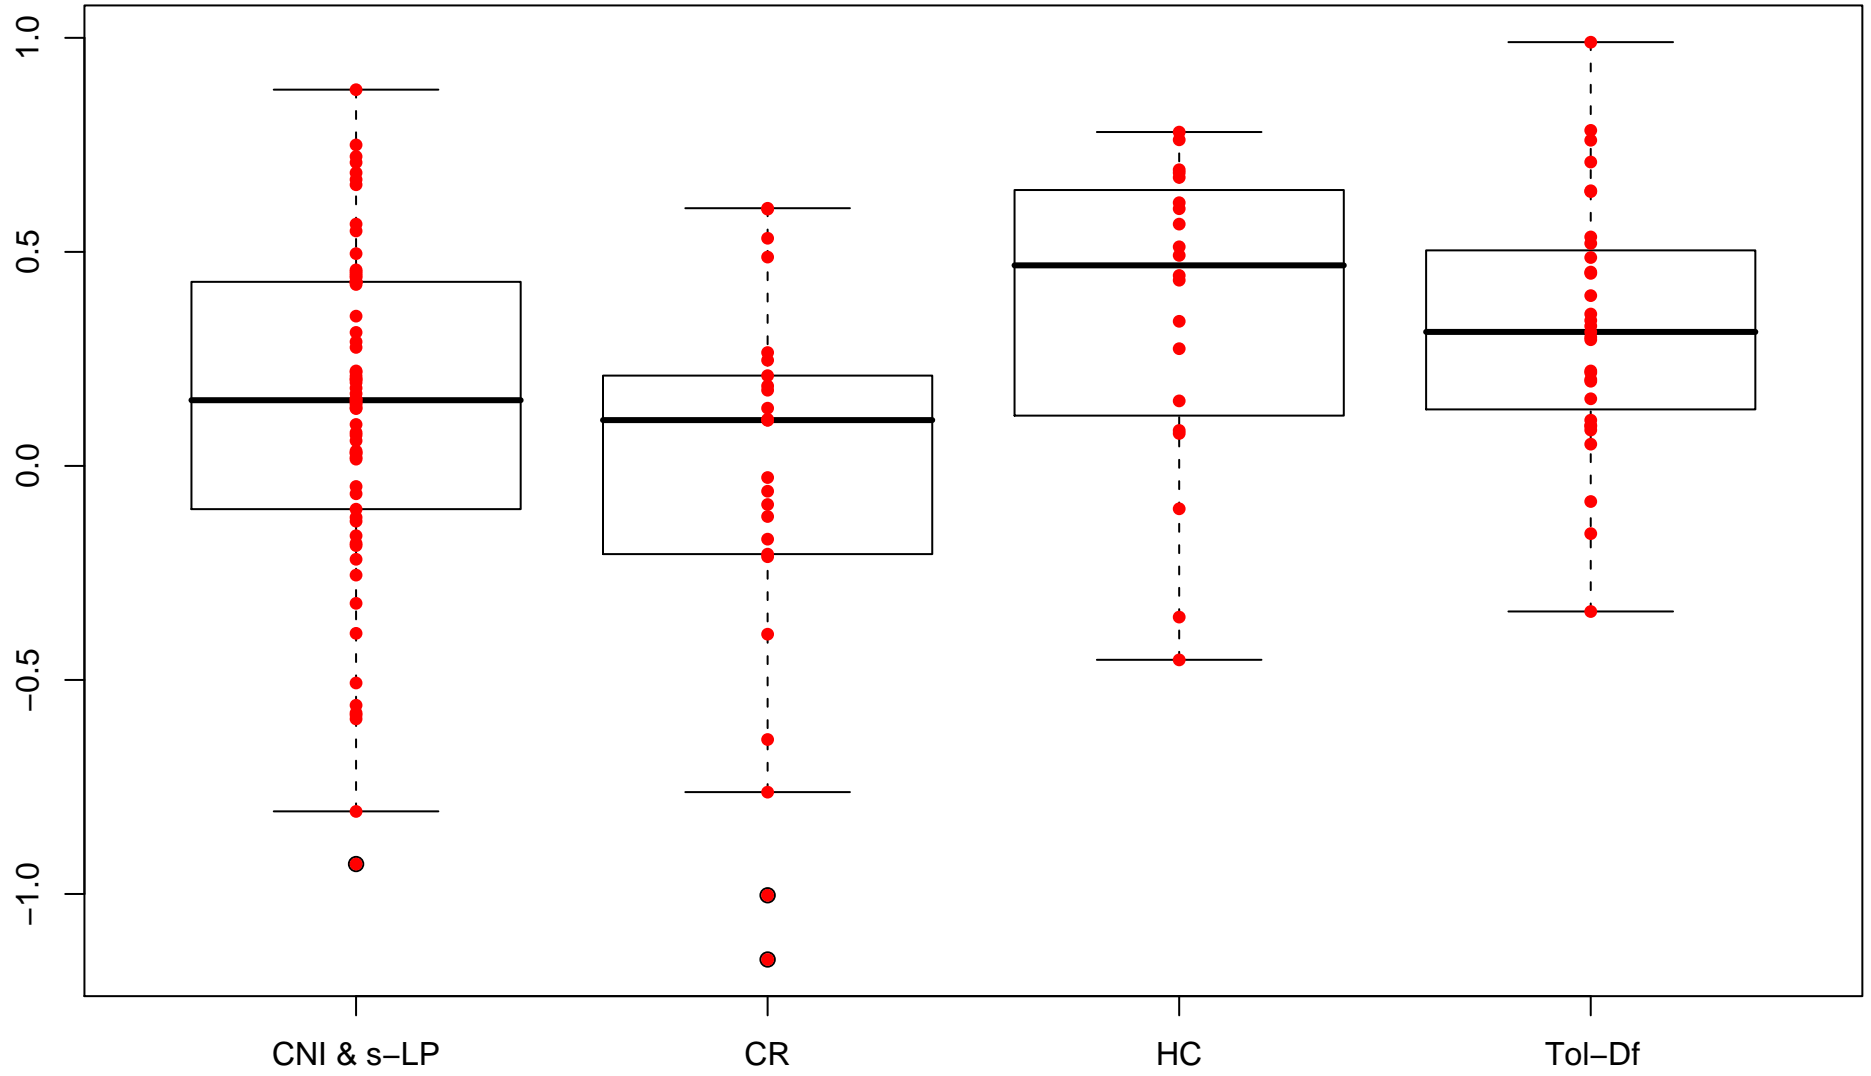

Rank 679 : EPRS  
0.0007706

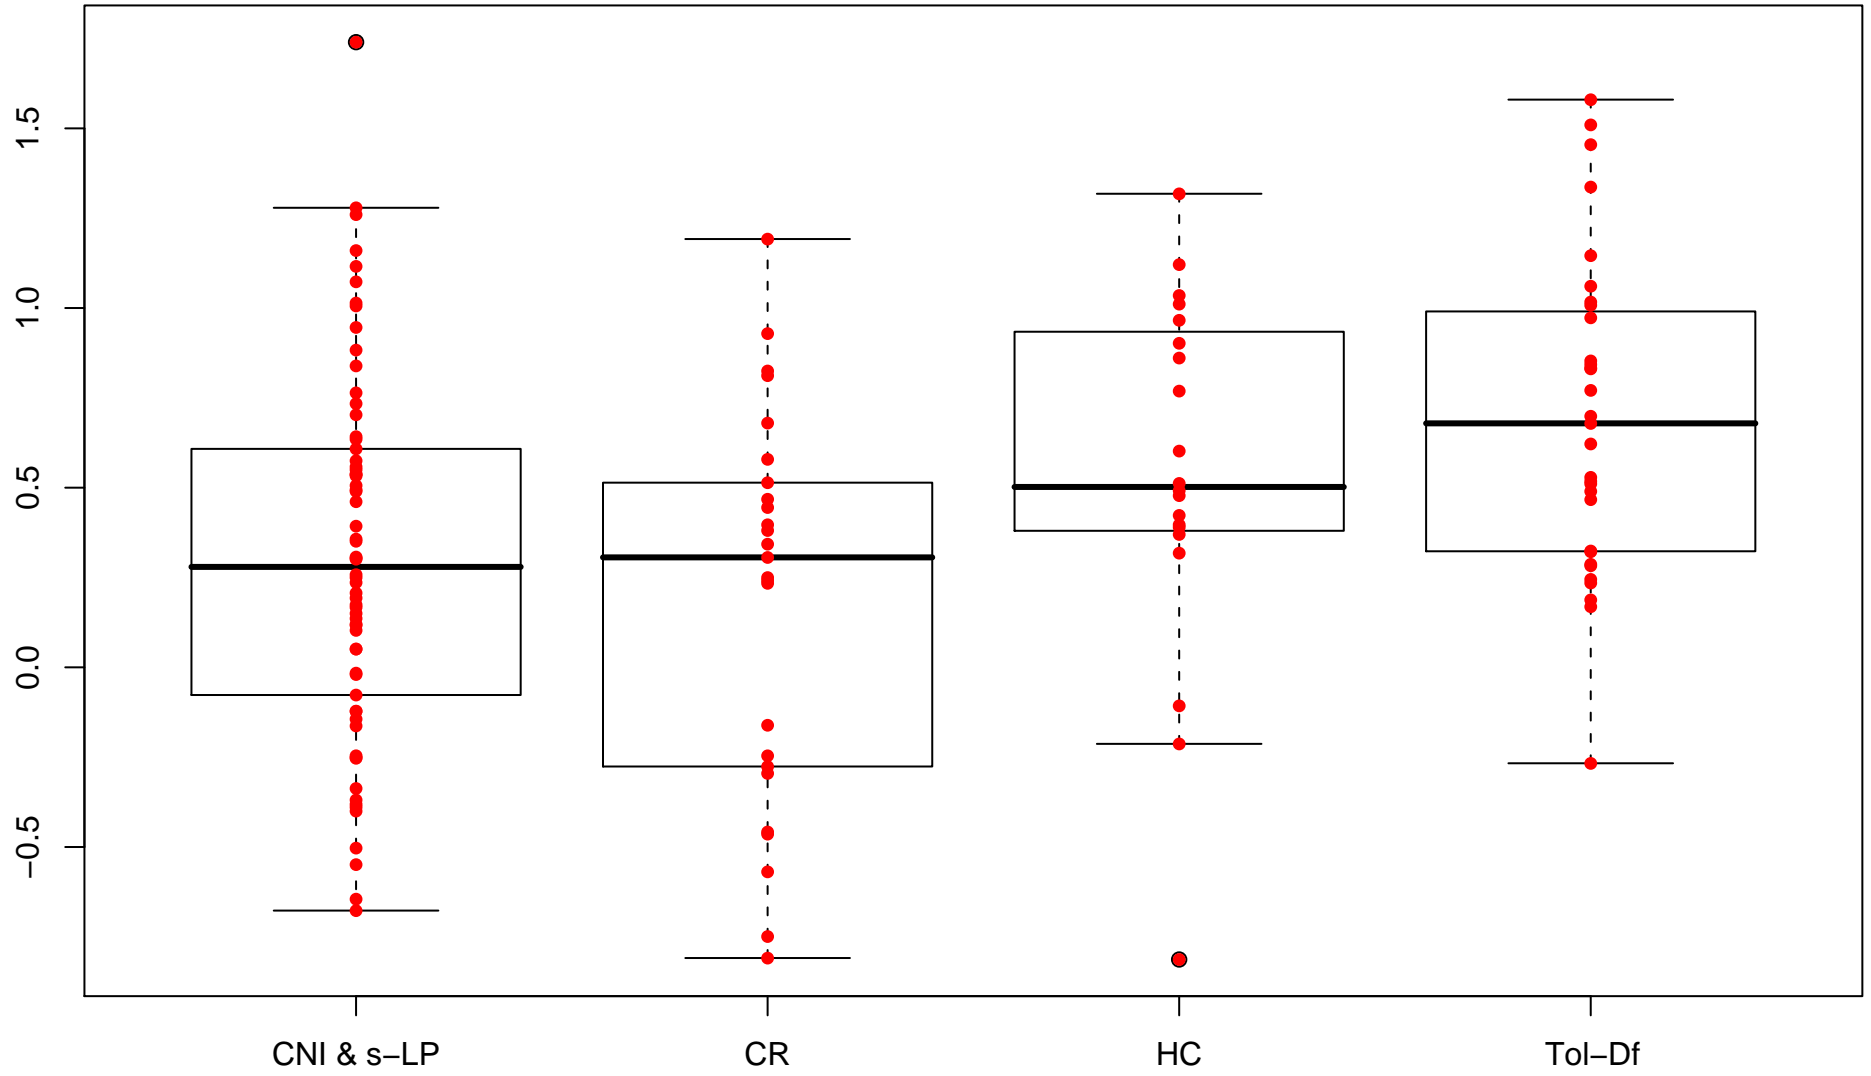



Rank 680 : TNFRSF25  
0.0007801

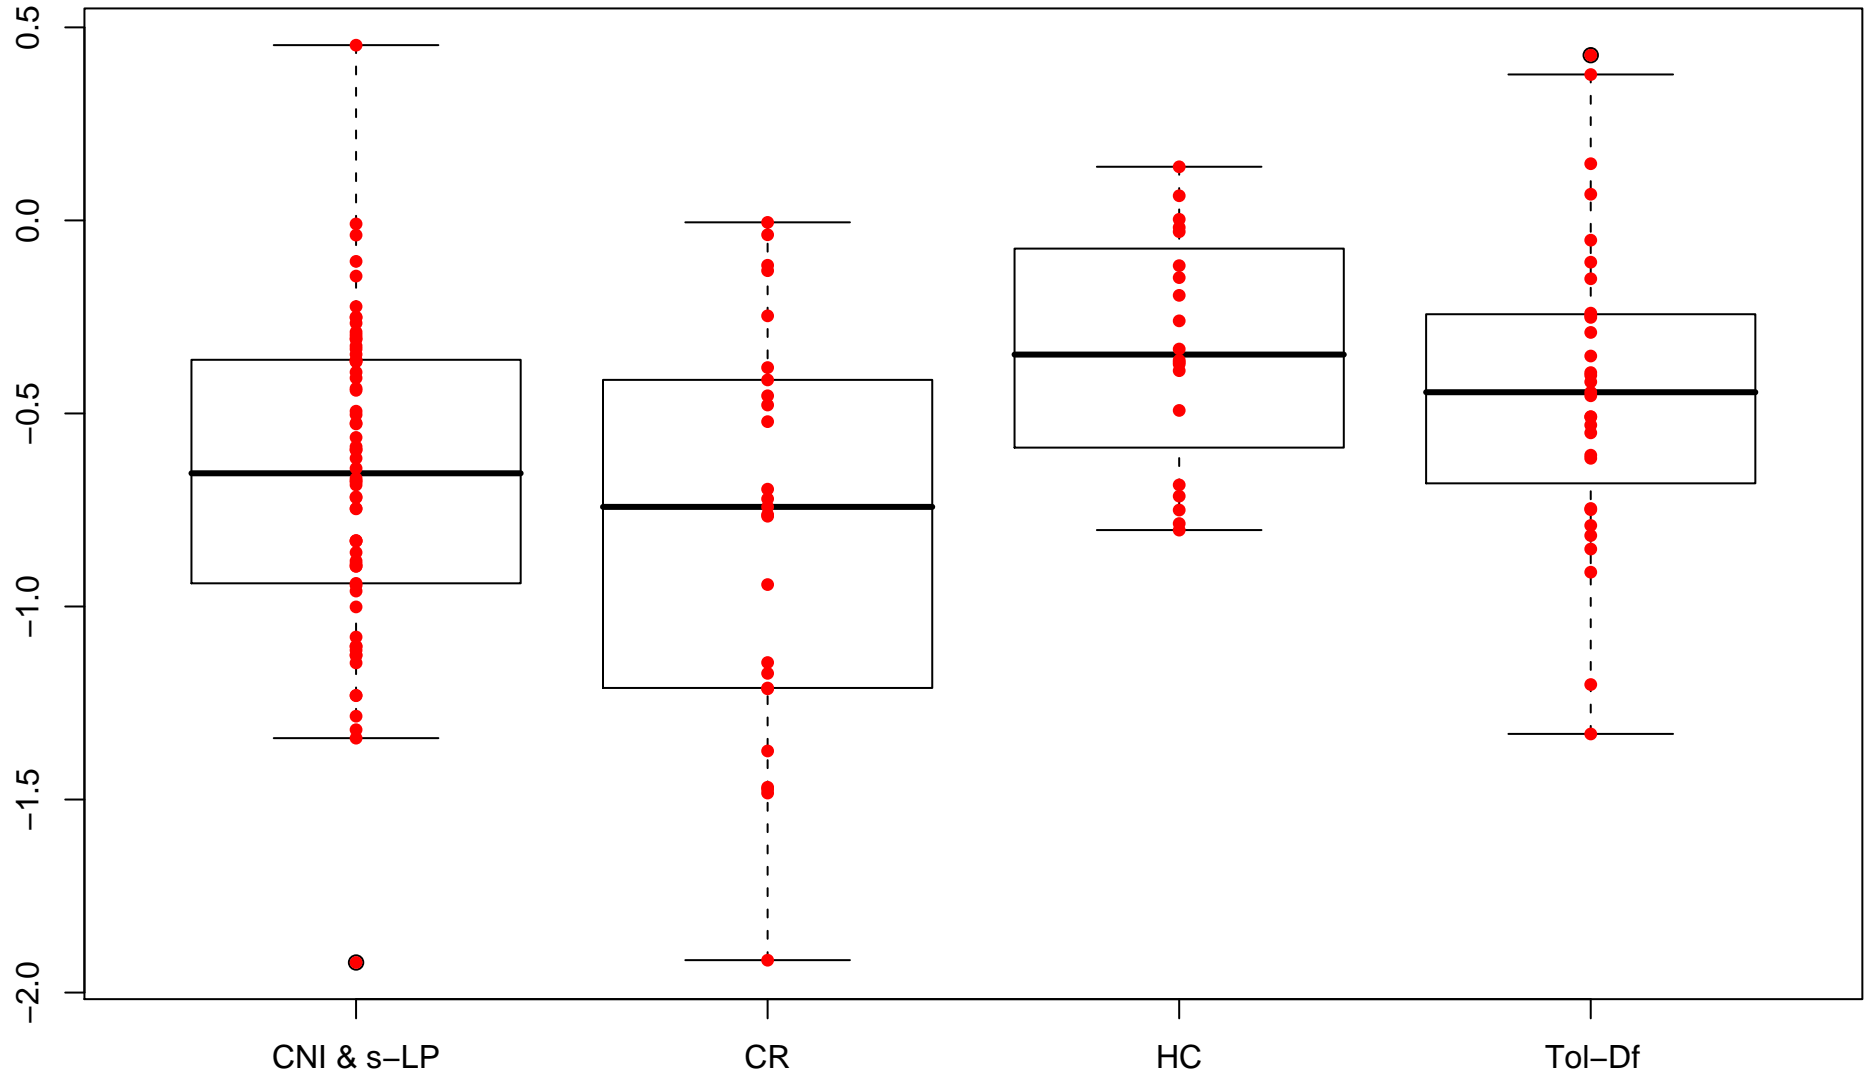

Rank 681 : LY9  
0.0007842

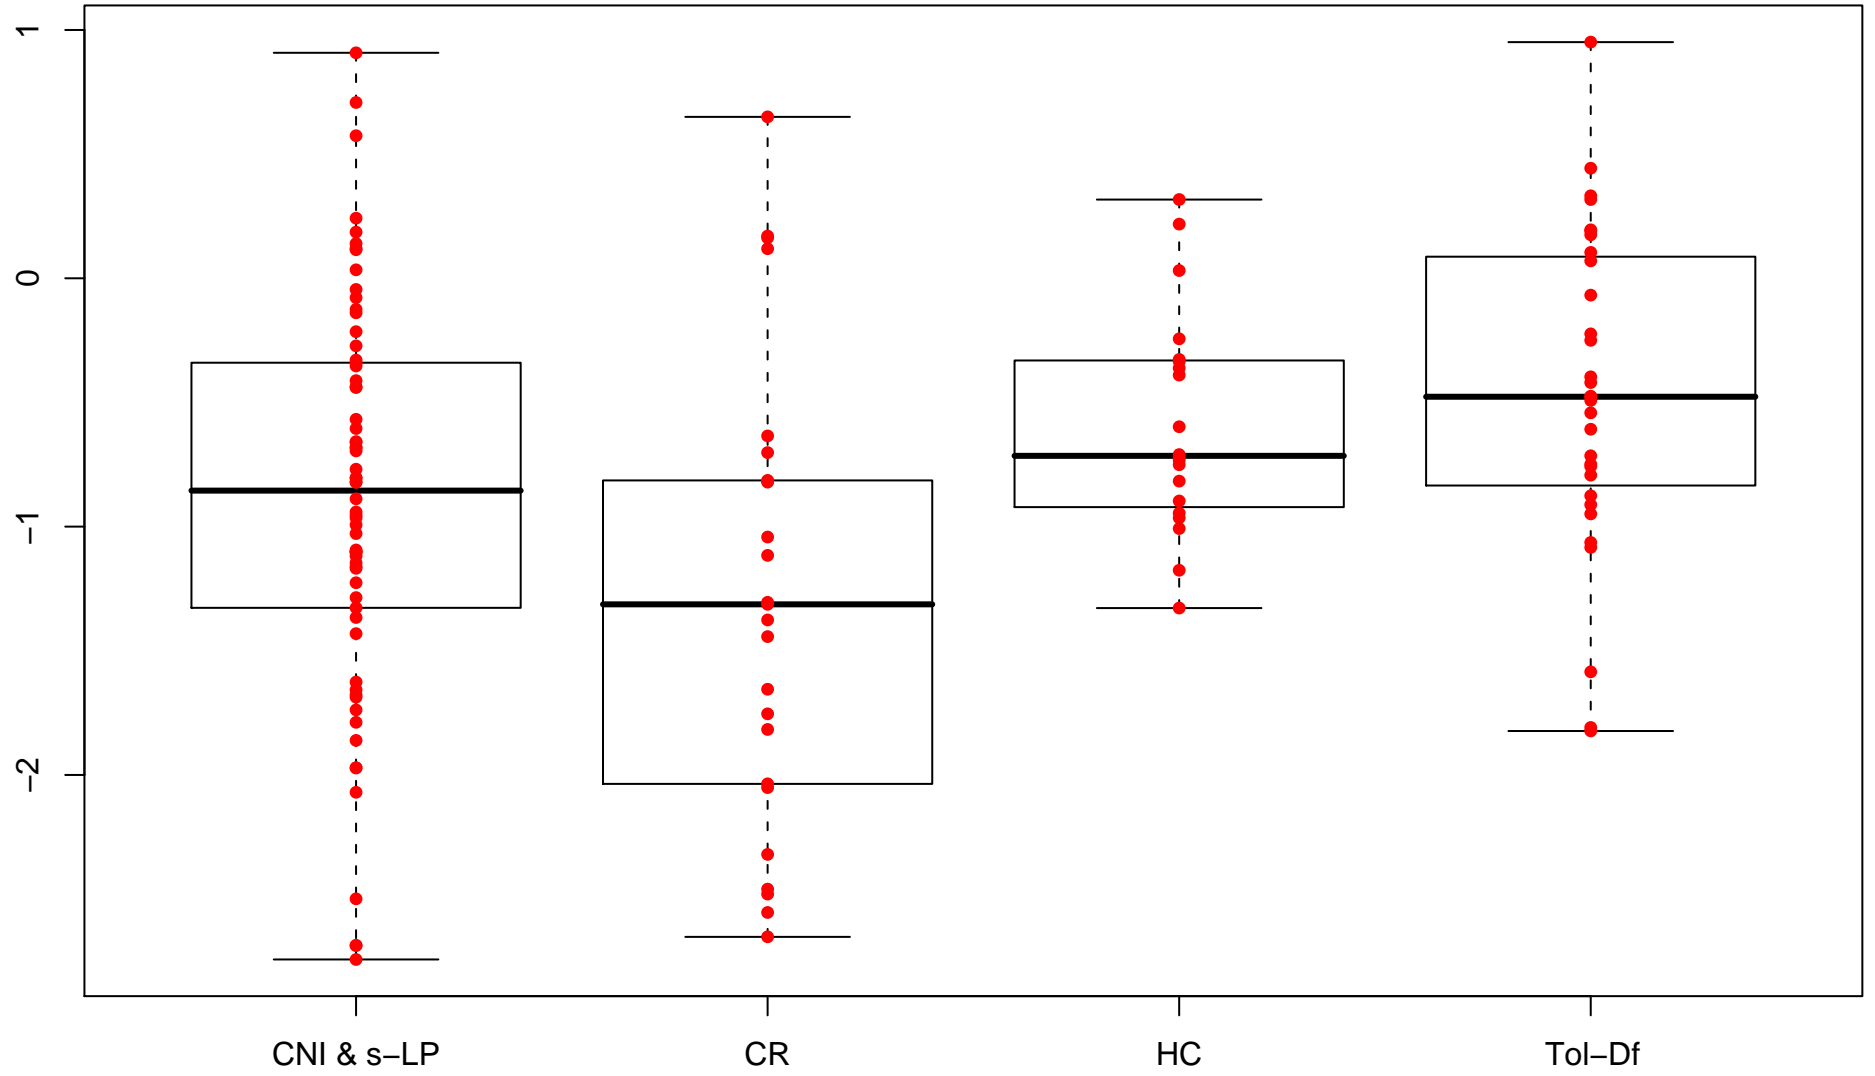

Rank 682 : BCS1L  
0.0007848

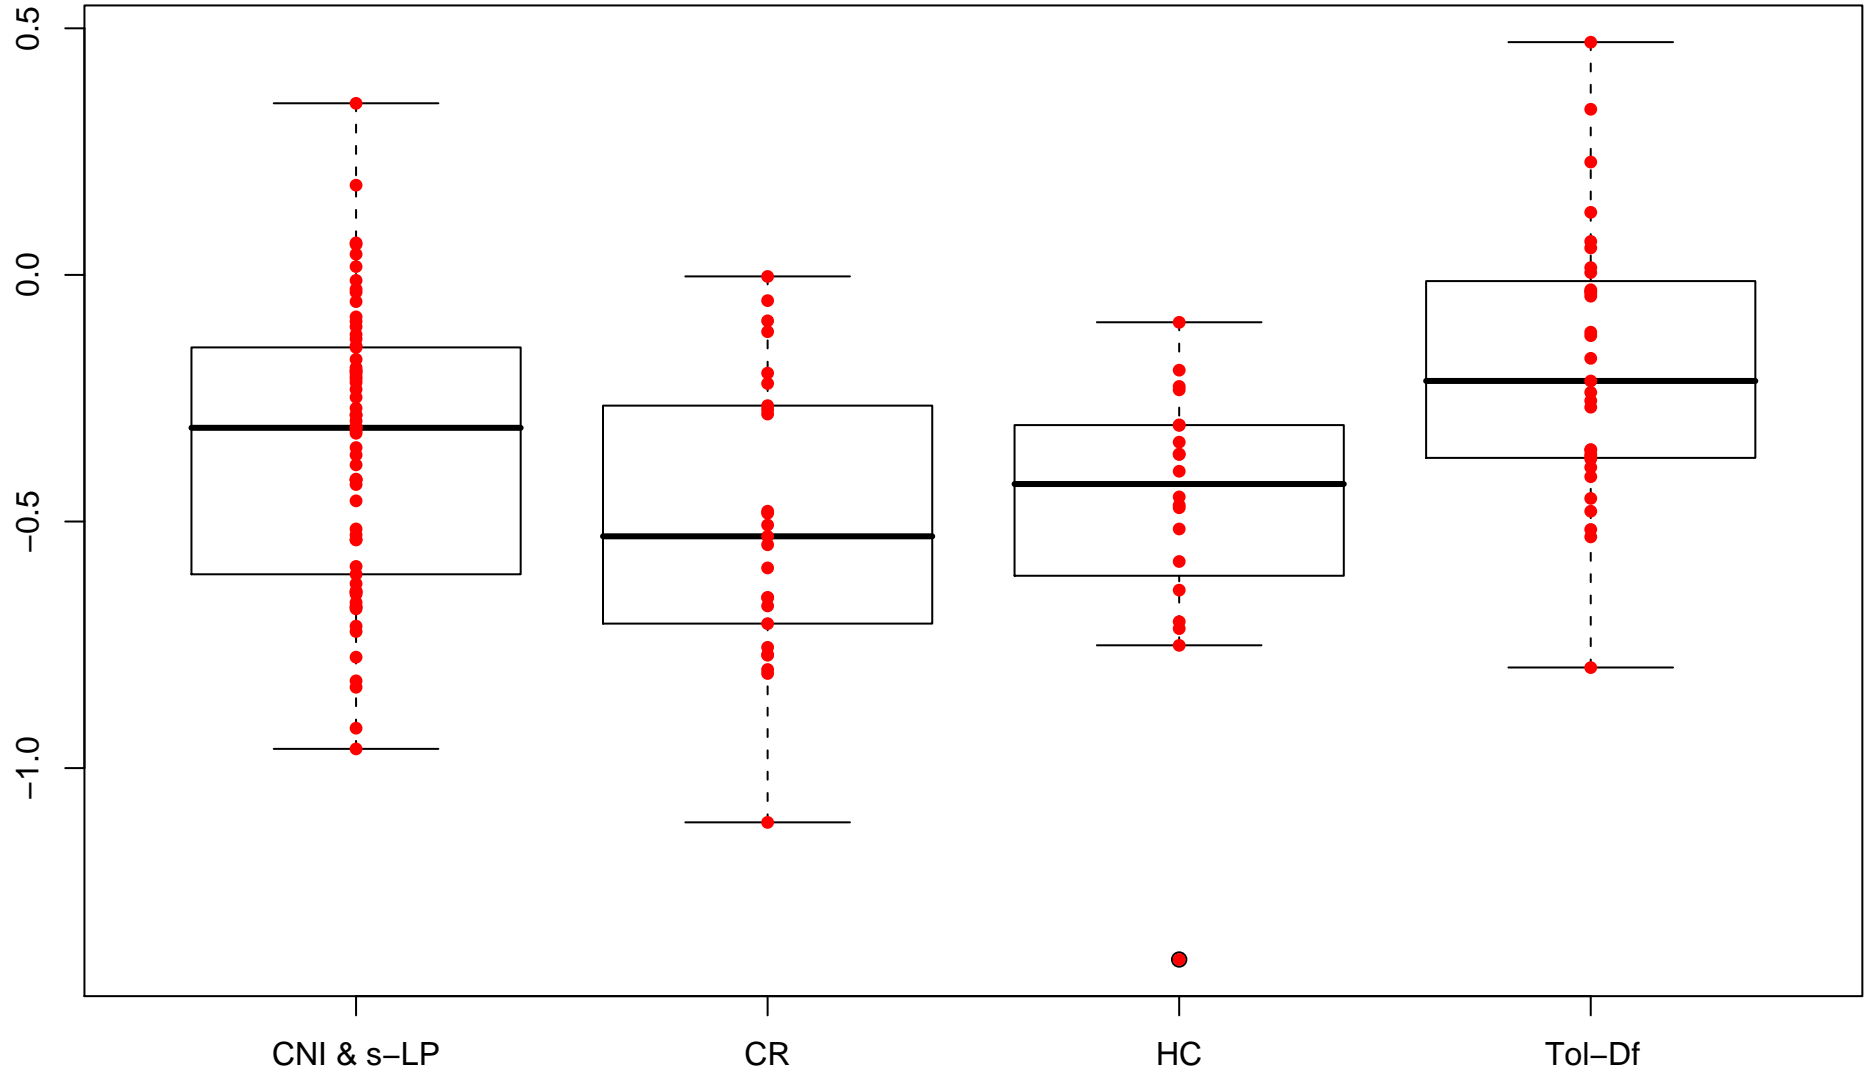

Rank 683 : IGBP1  
0.0007865

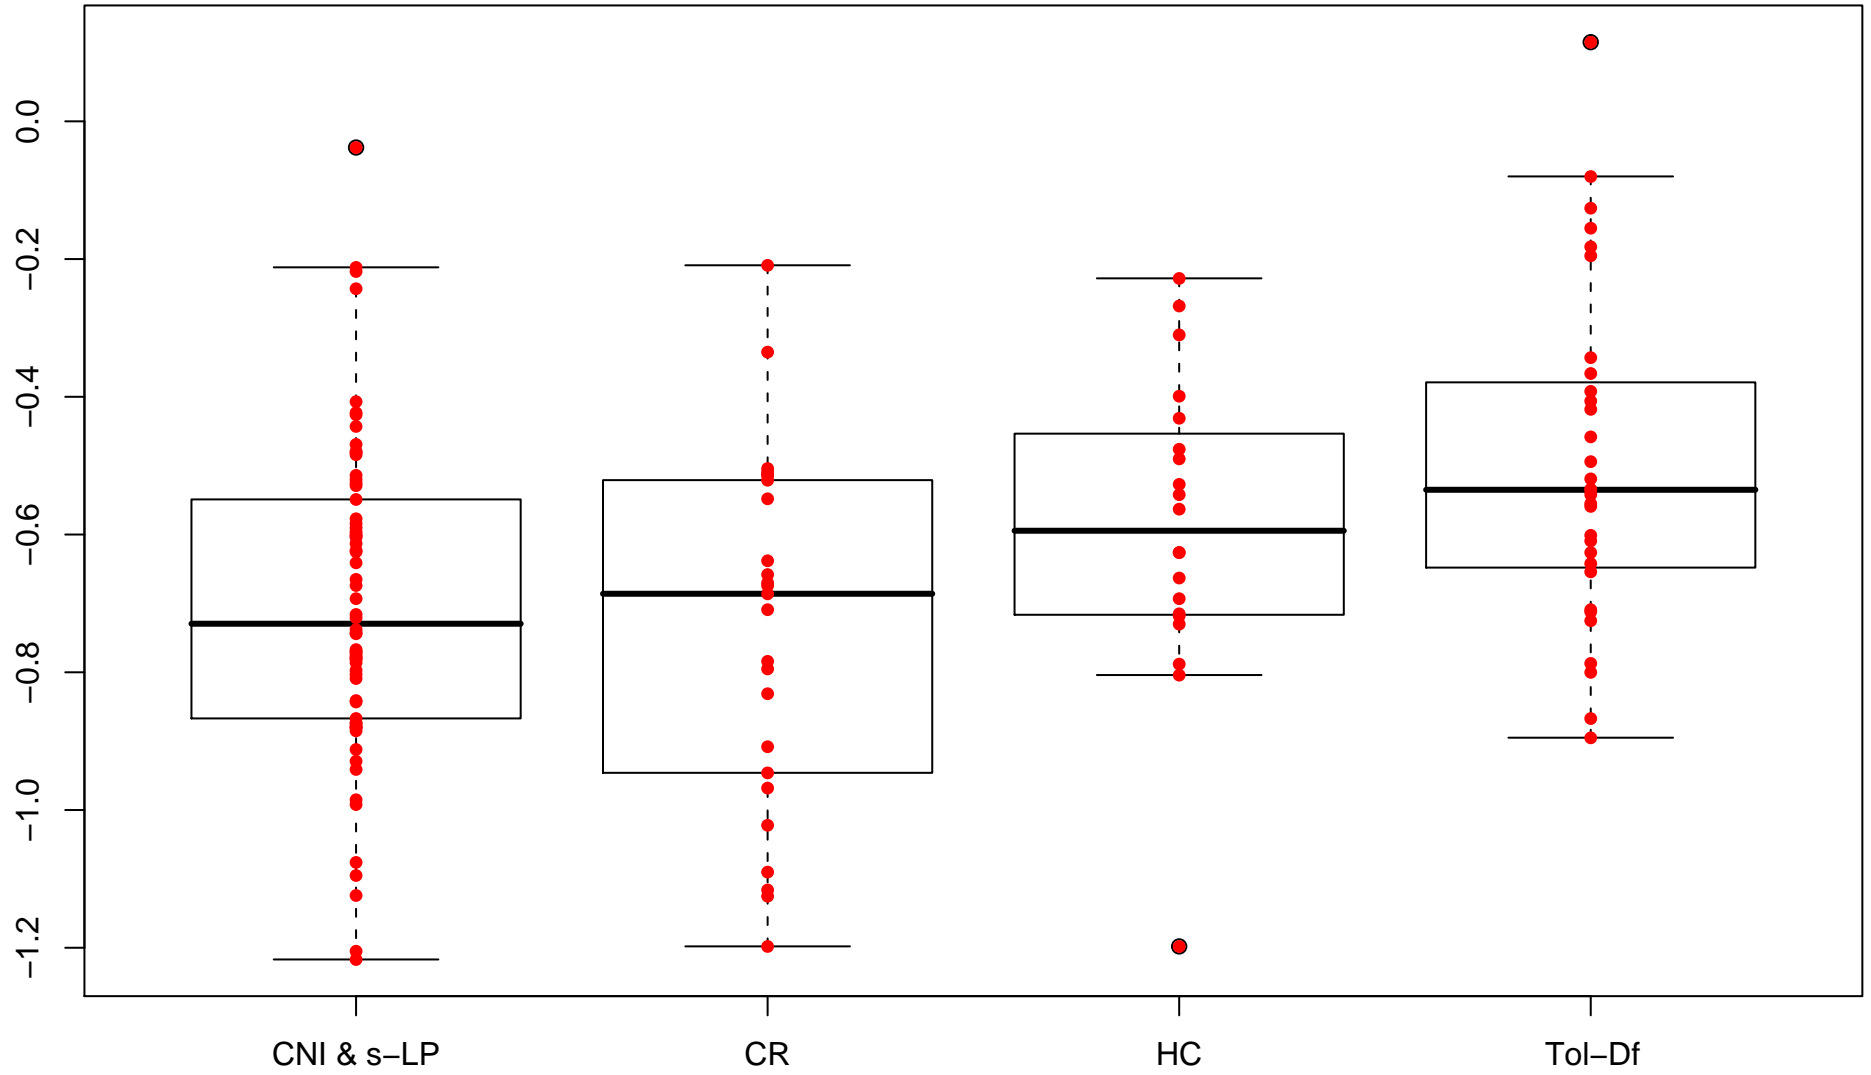

Rank 684 : RBM3  
0.0007968

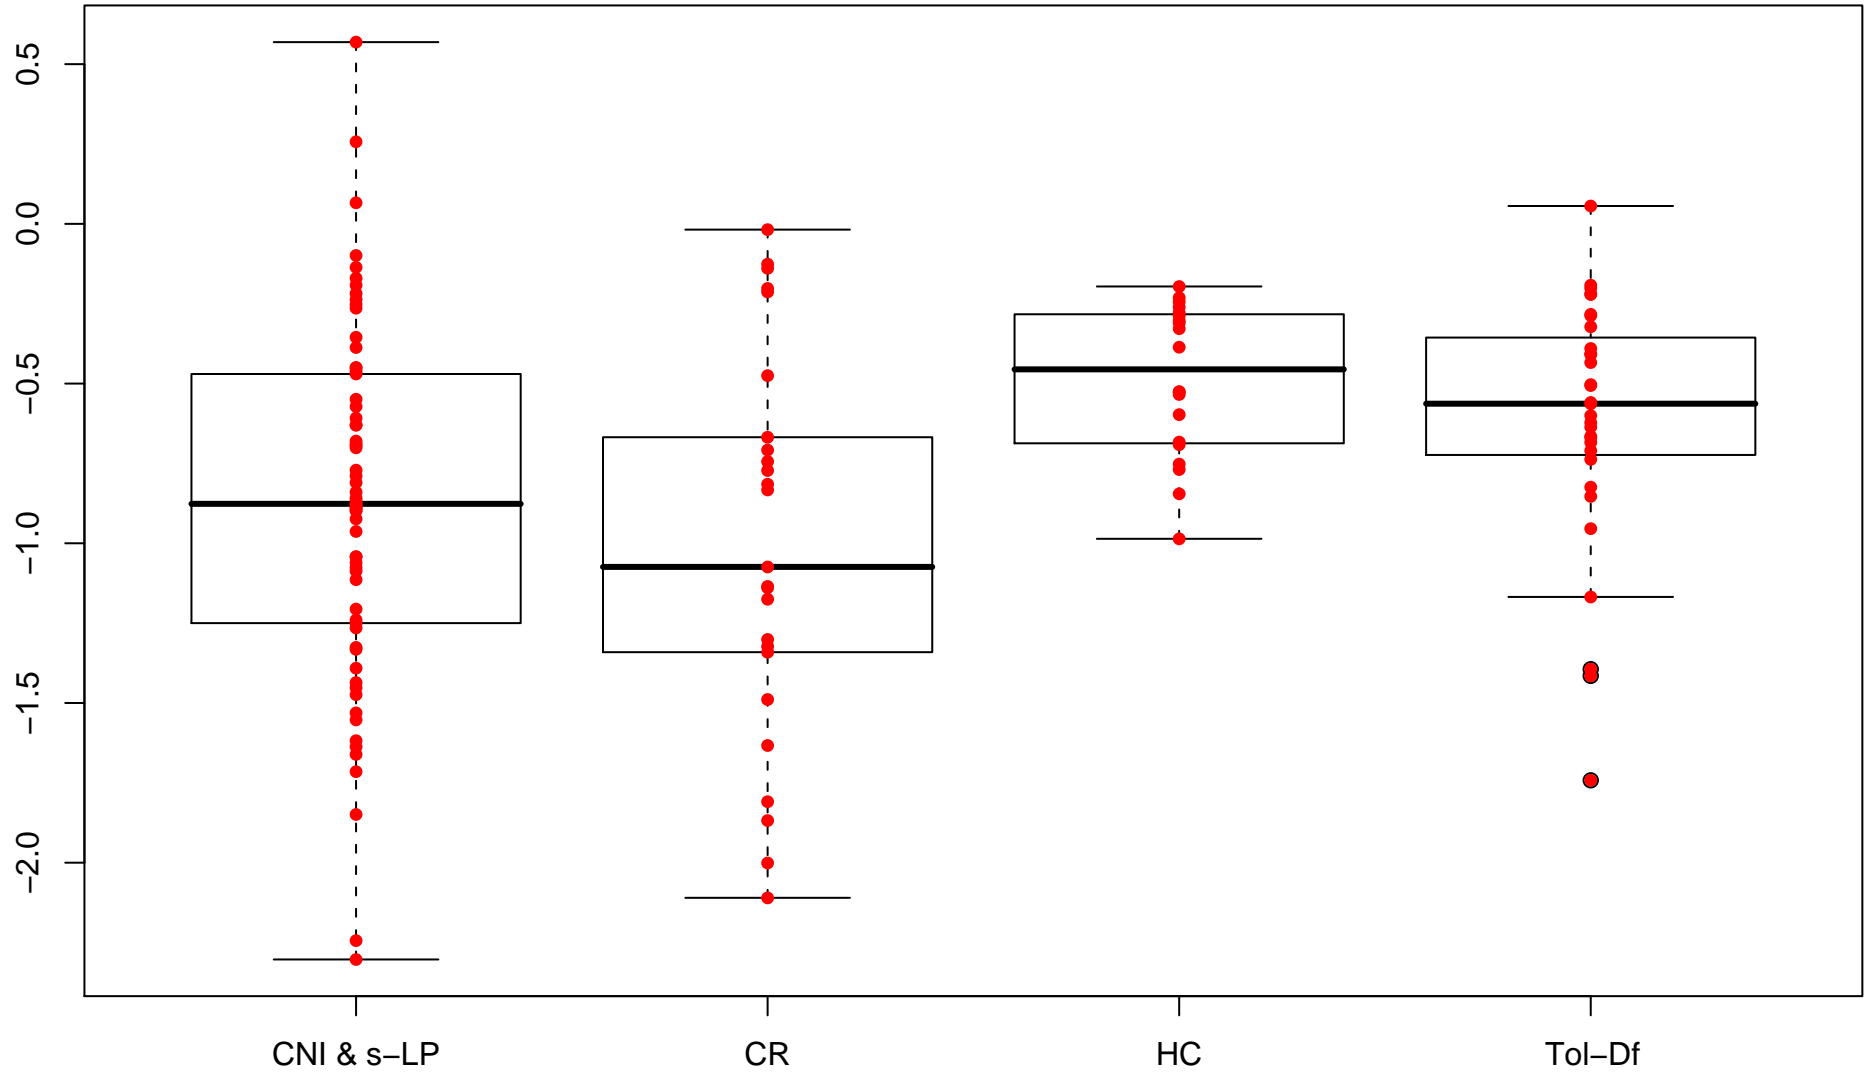

Rank 685 : CFLAR  
0.0007982

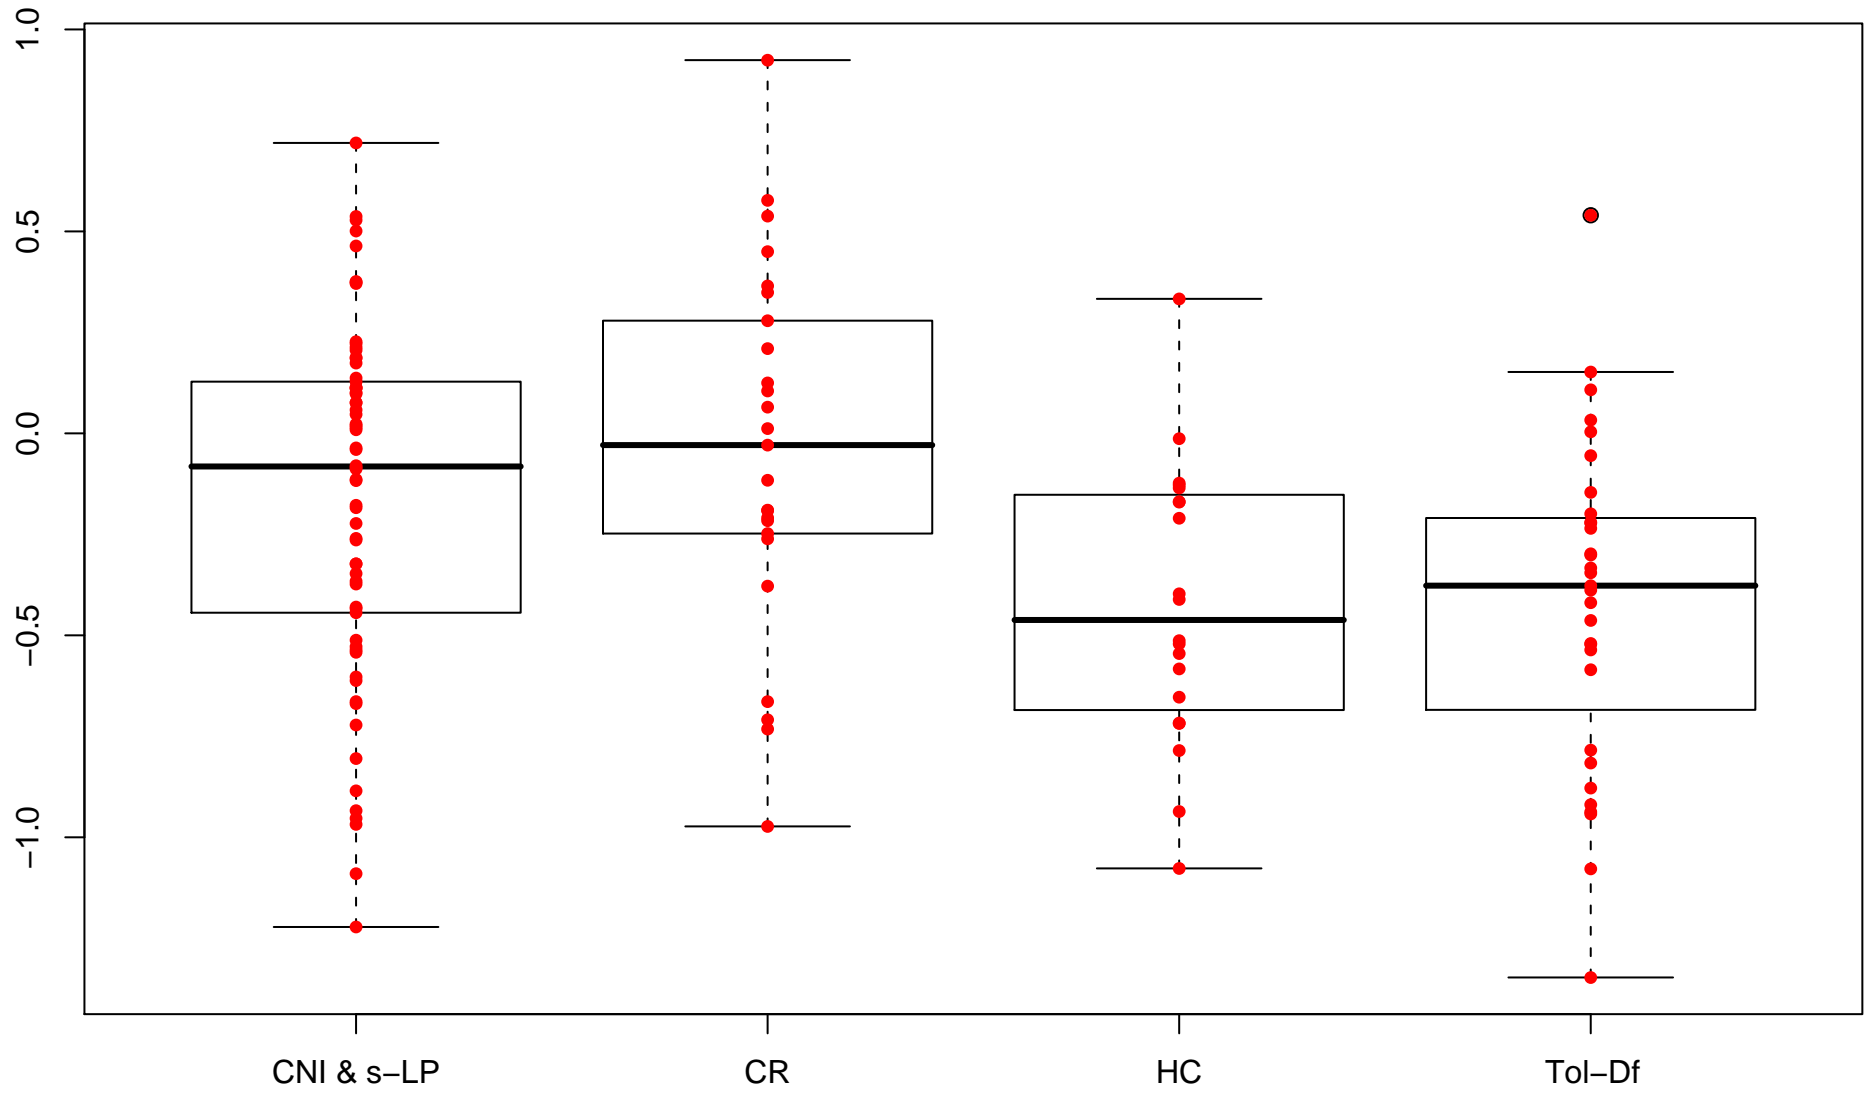

Rank 686 : ABCC4  
8e-04

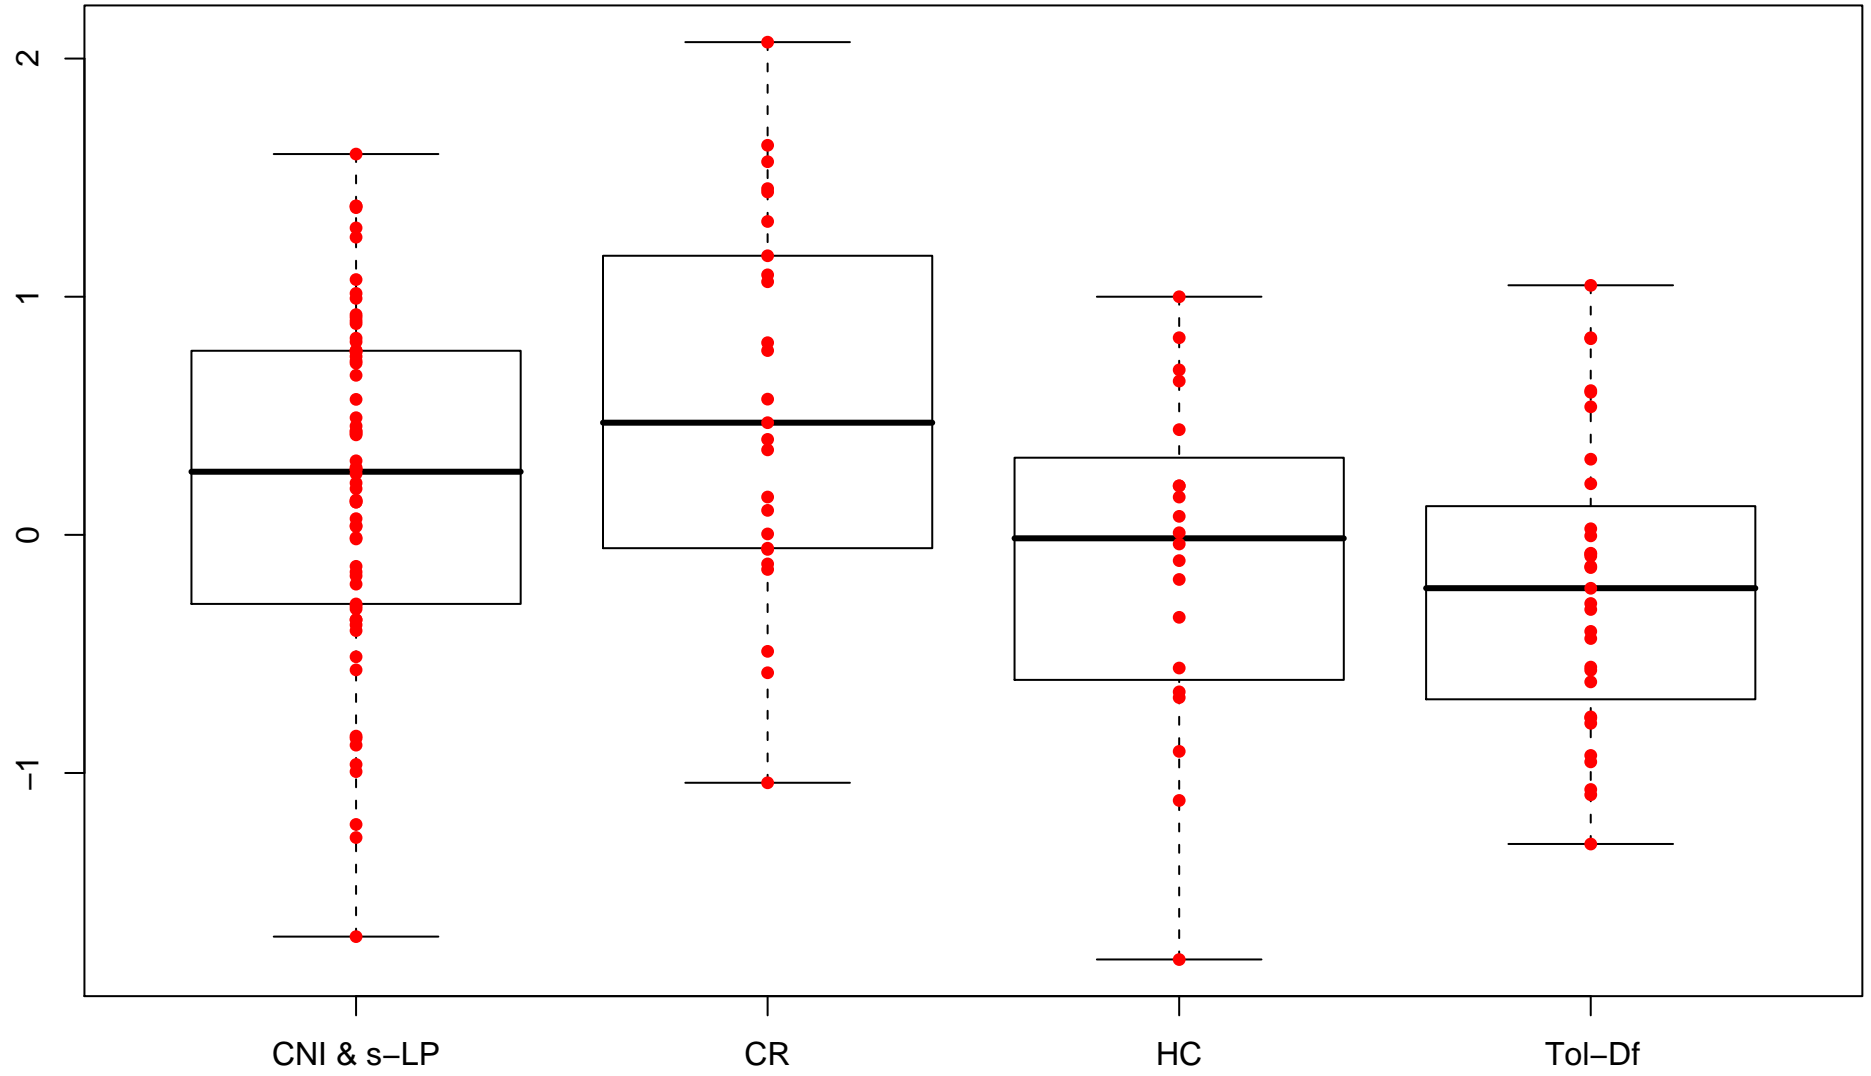

Rank 687 : ZRANB3  
0.0008006

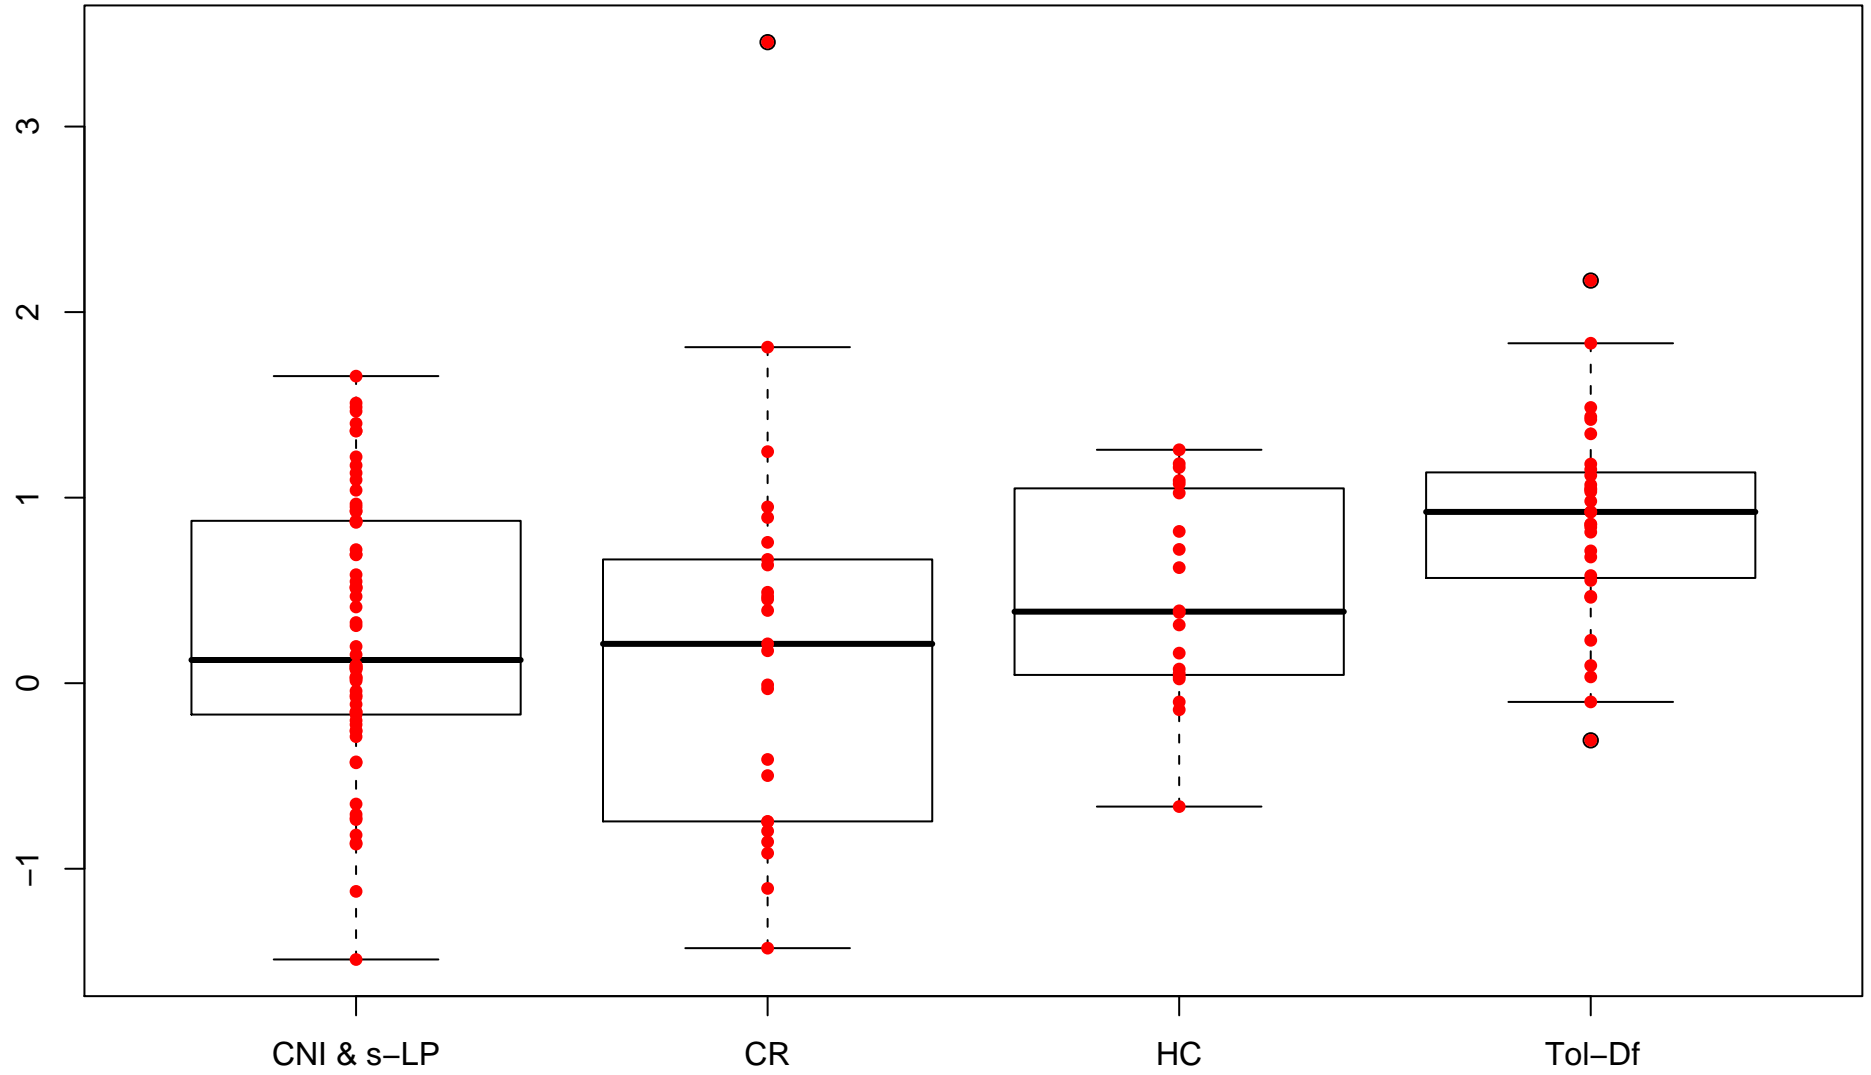



Rank 688 : FAM152A  
0.0008008

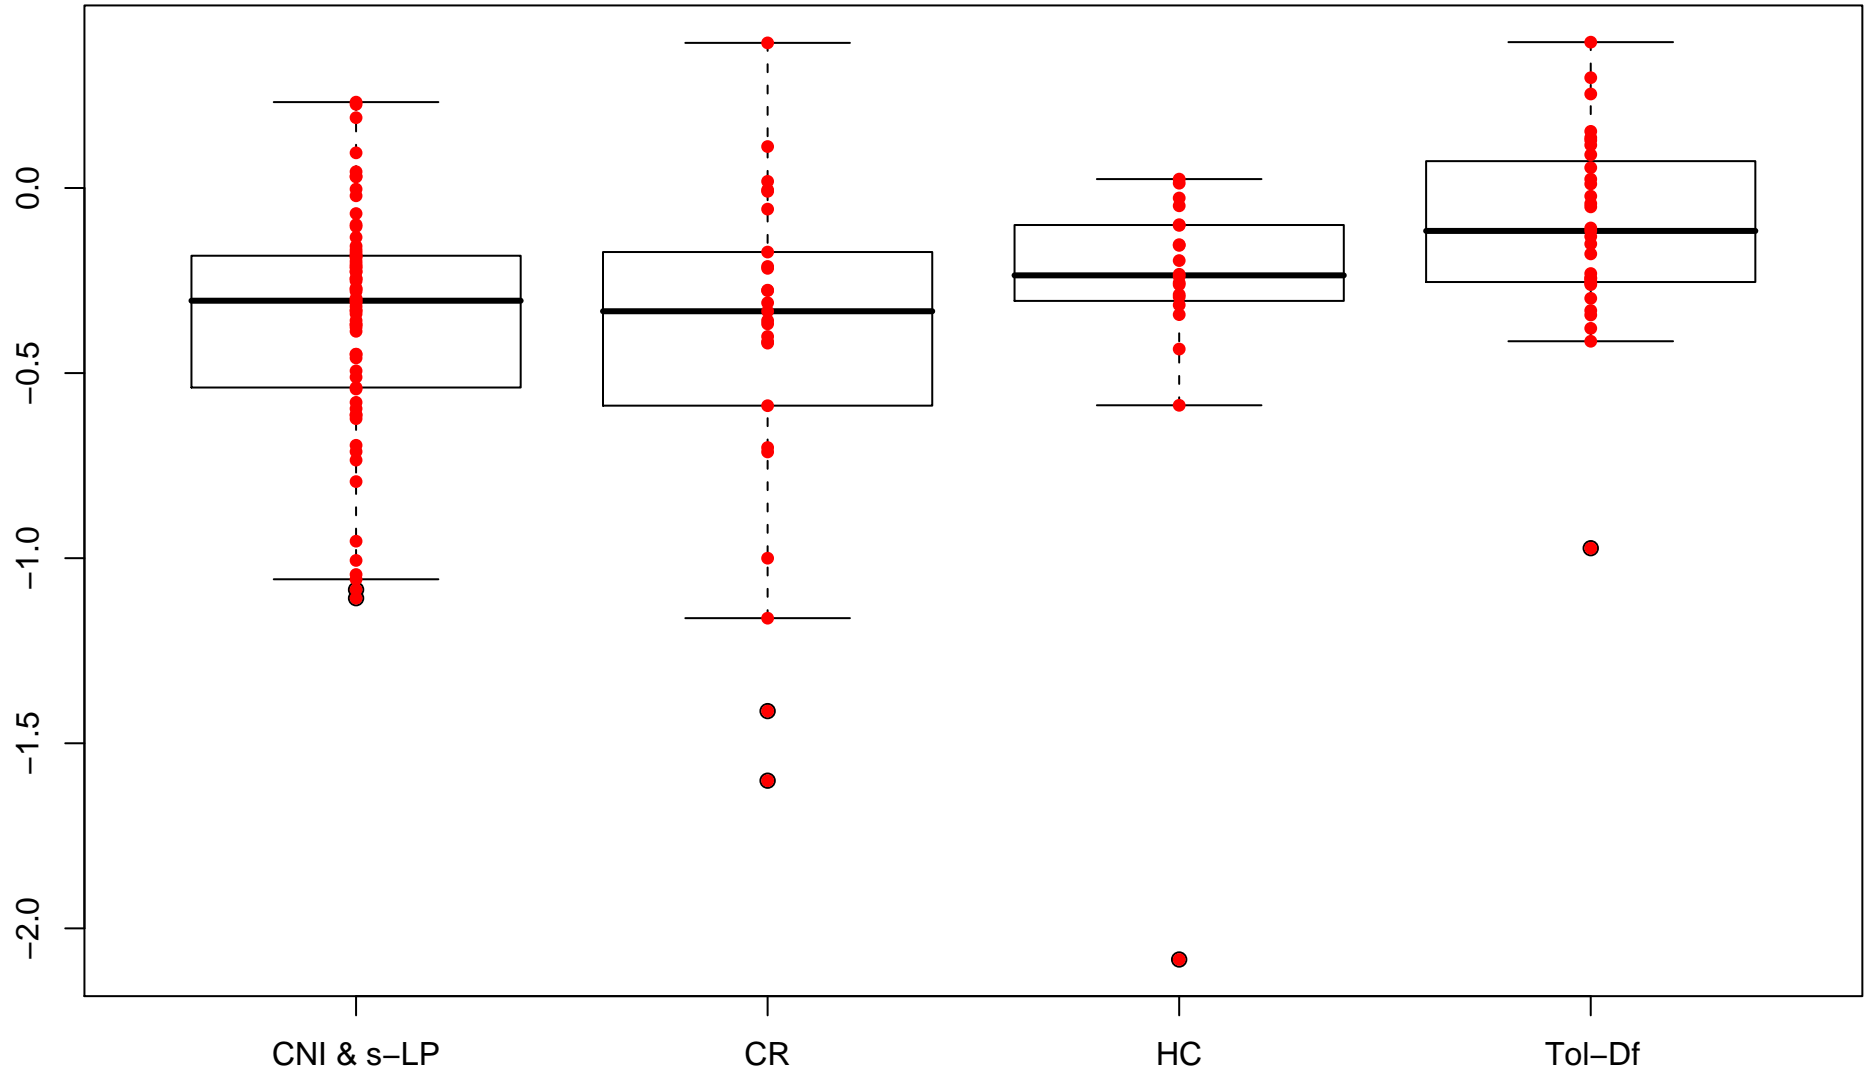

Rank 689 : JDP2  
0.0008065

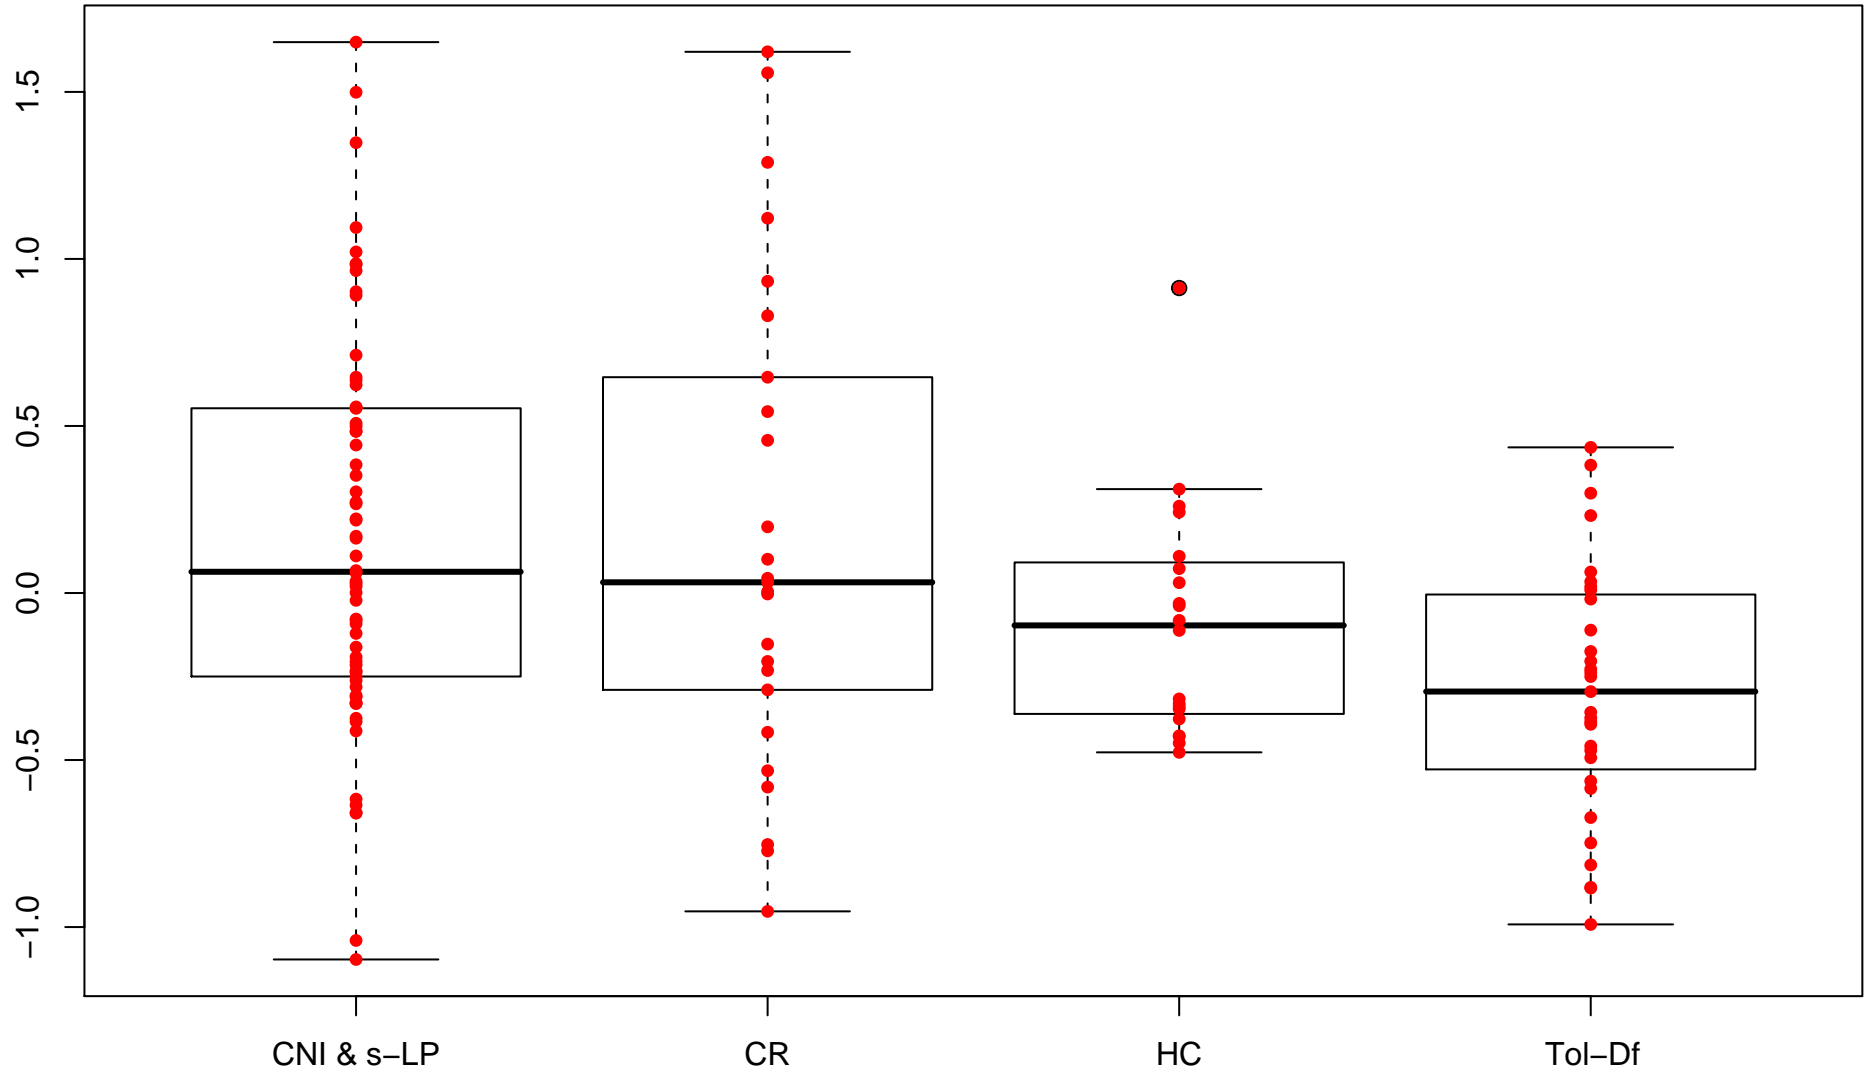

Rank 690 : AFF3  
0.0008086

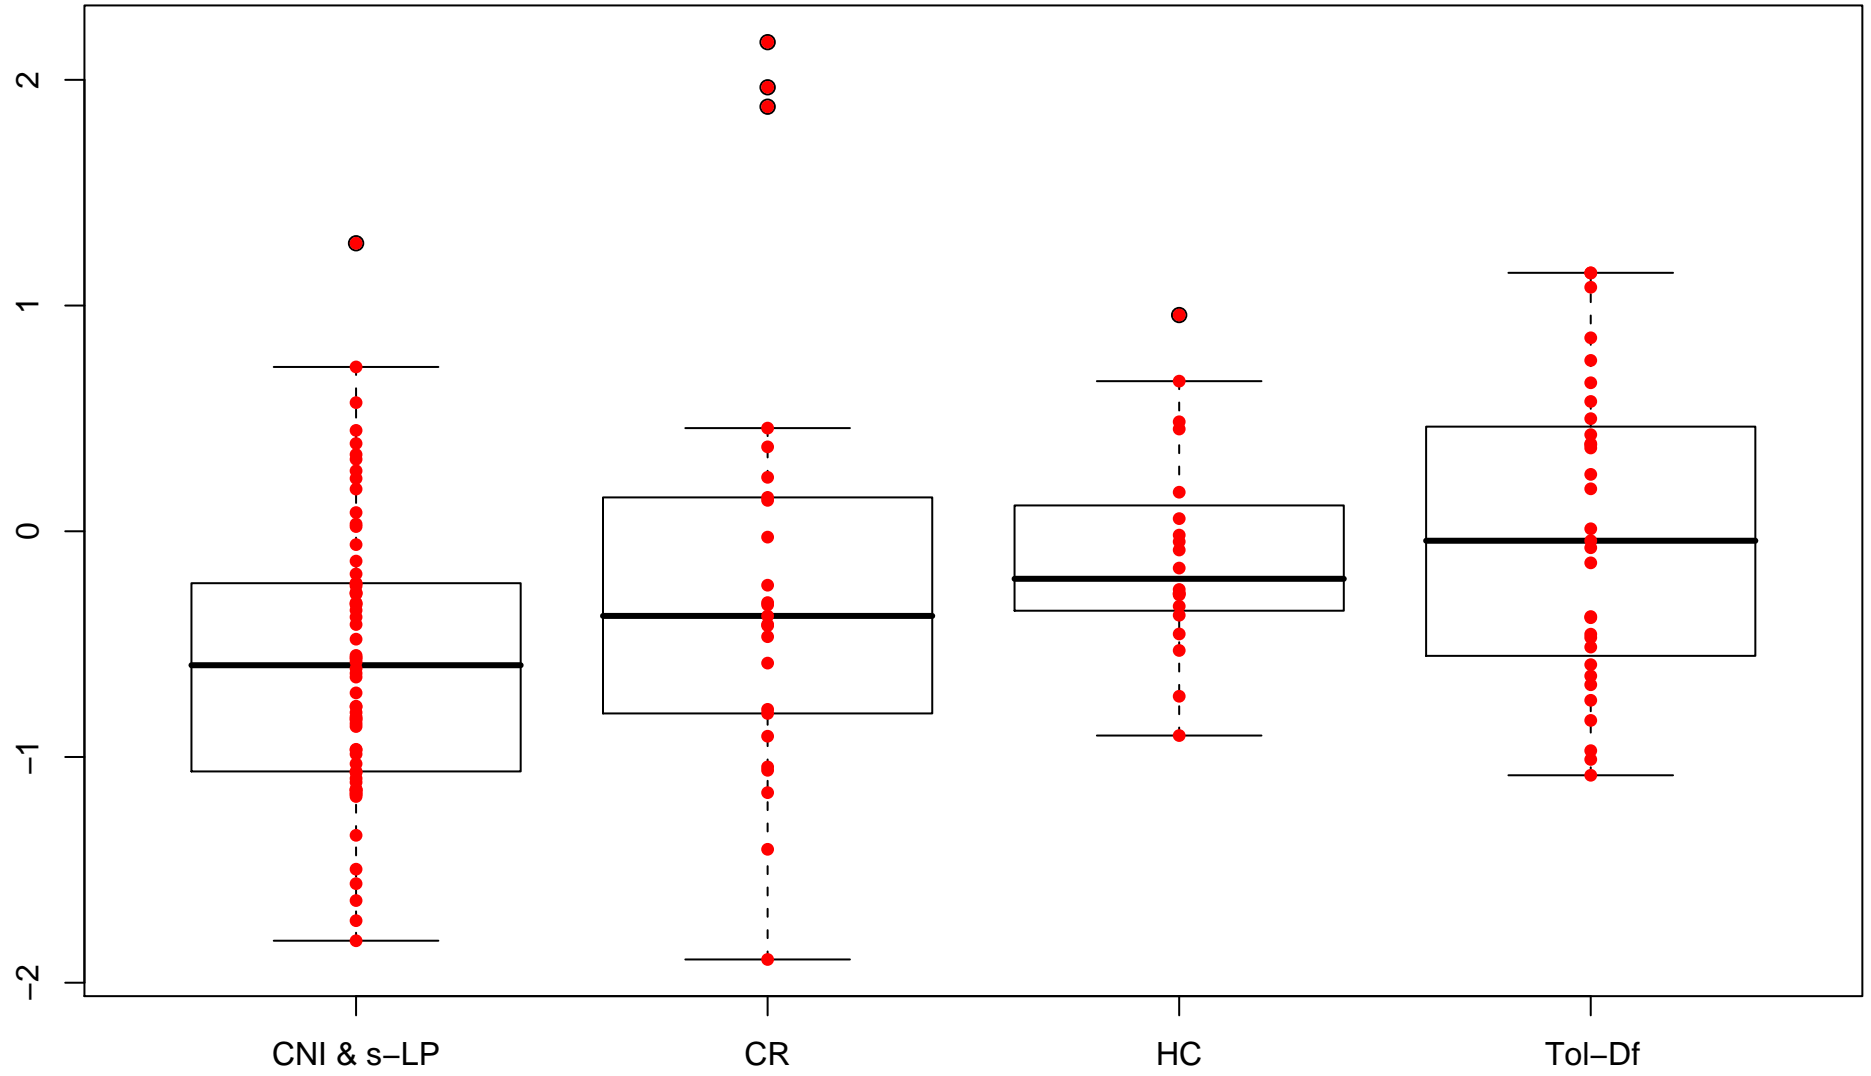

Rank 691 : CENPM  
0.0008121

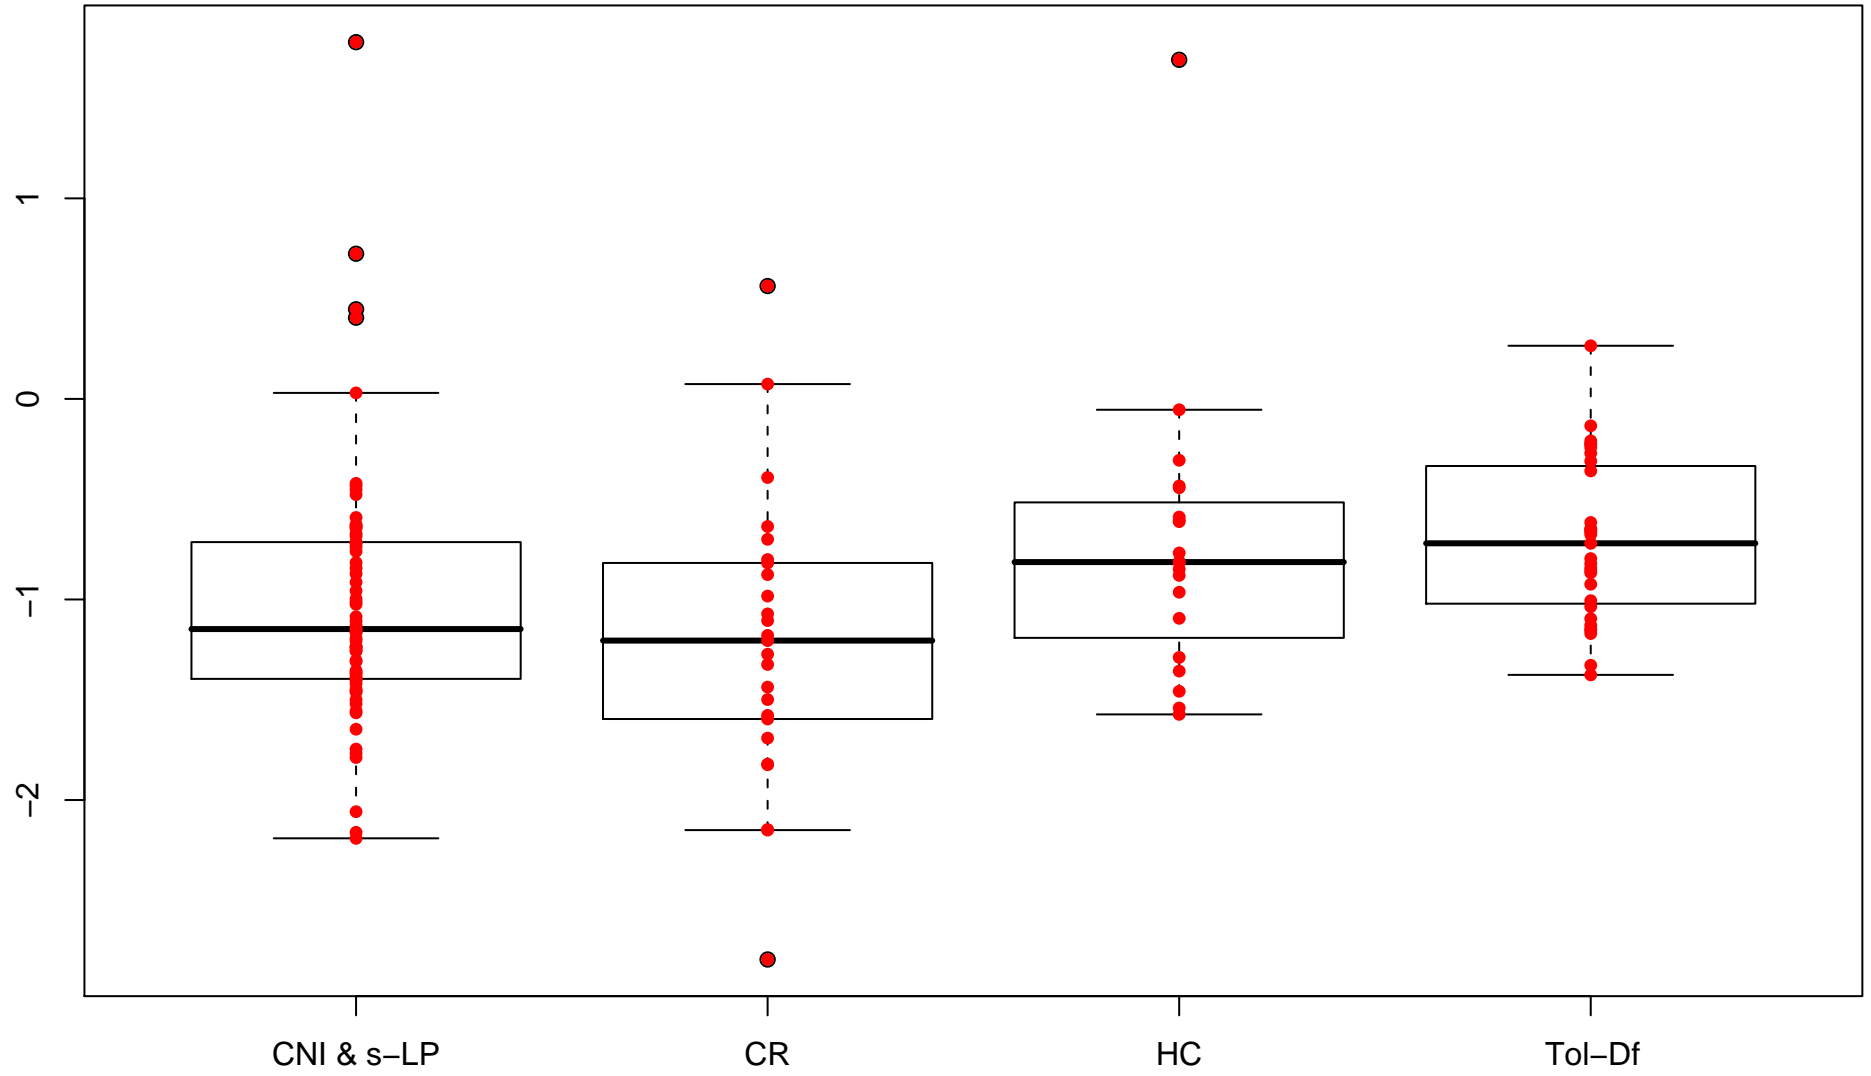

Rank 692 : LOC342892  
0.0008186

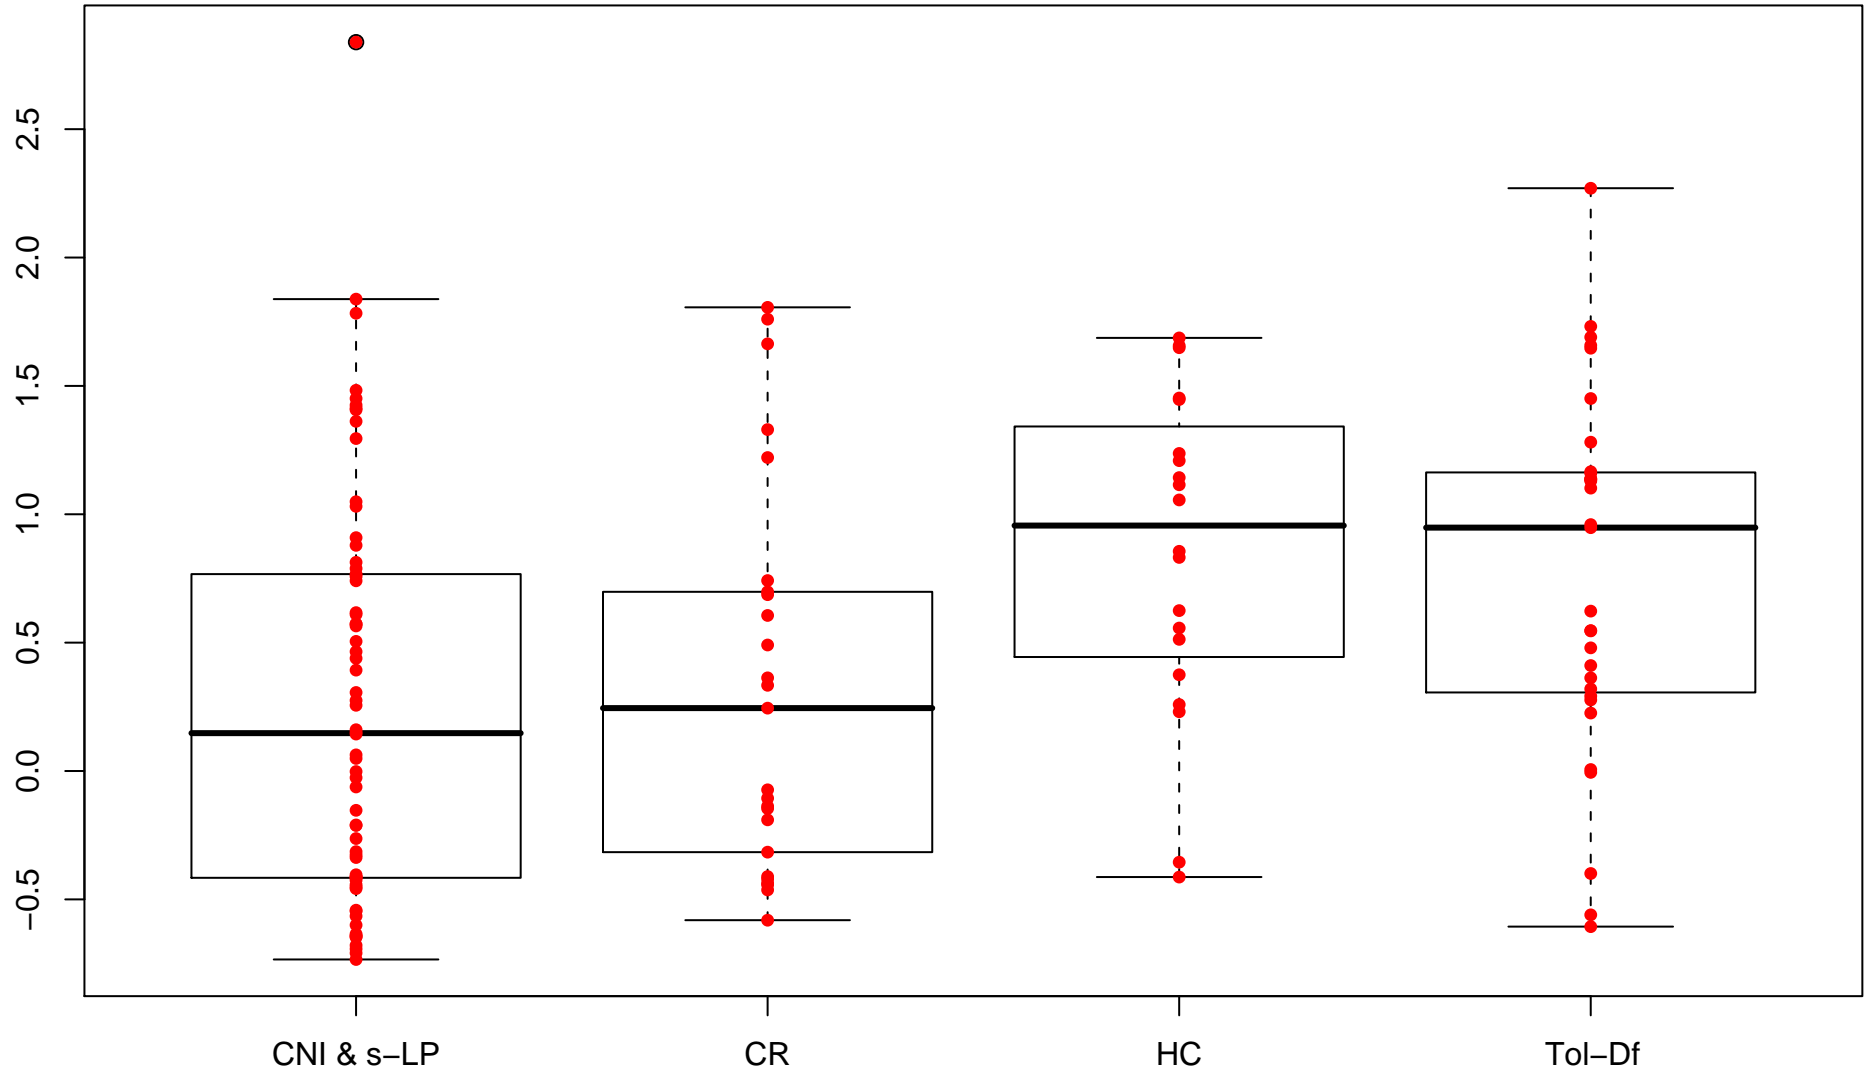

Rank 693 : MICAL2  
0.0008188

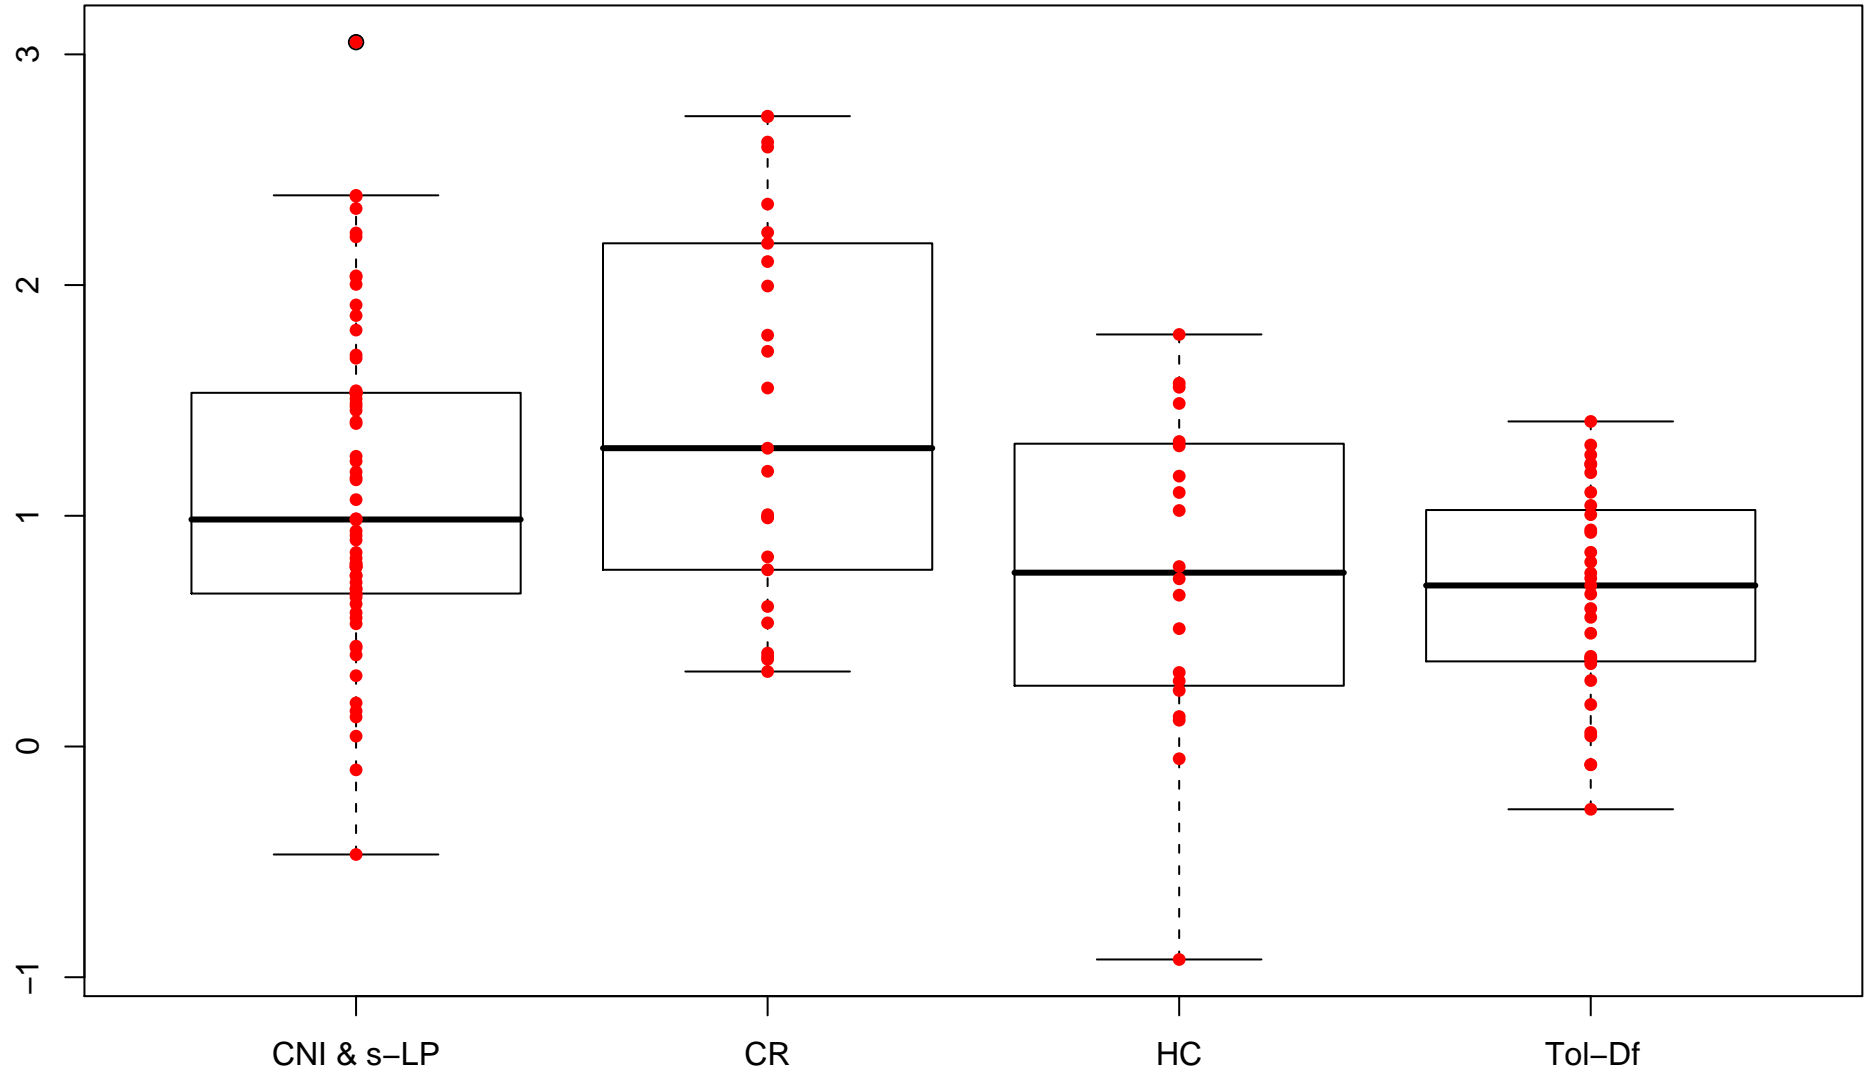

Rank 694 : SPATA6  
0.0008254

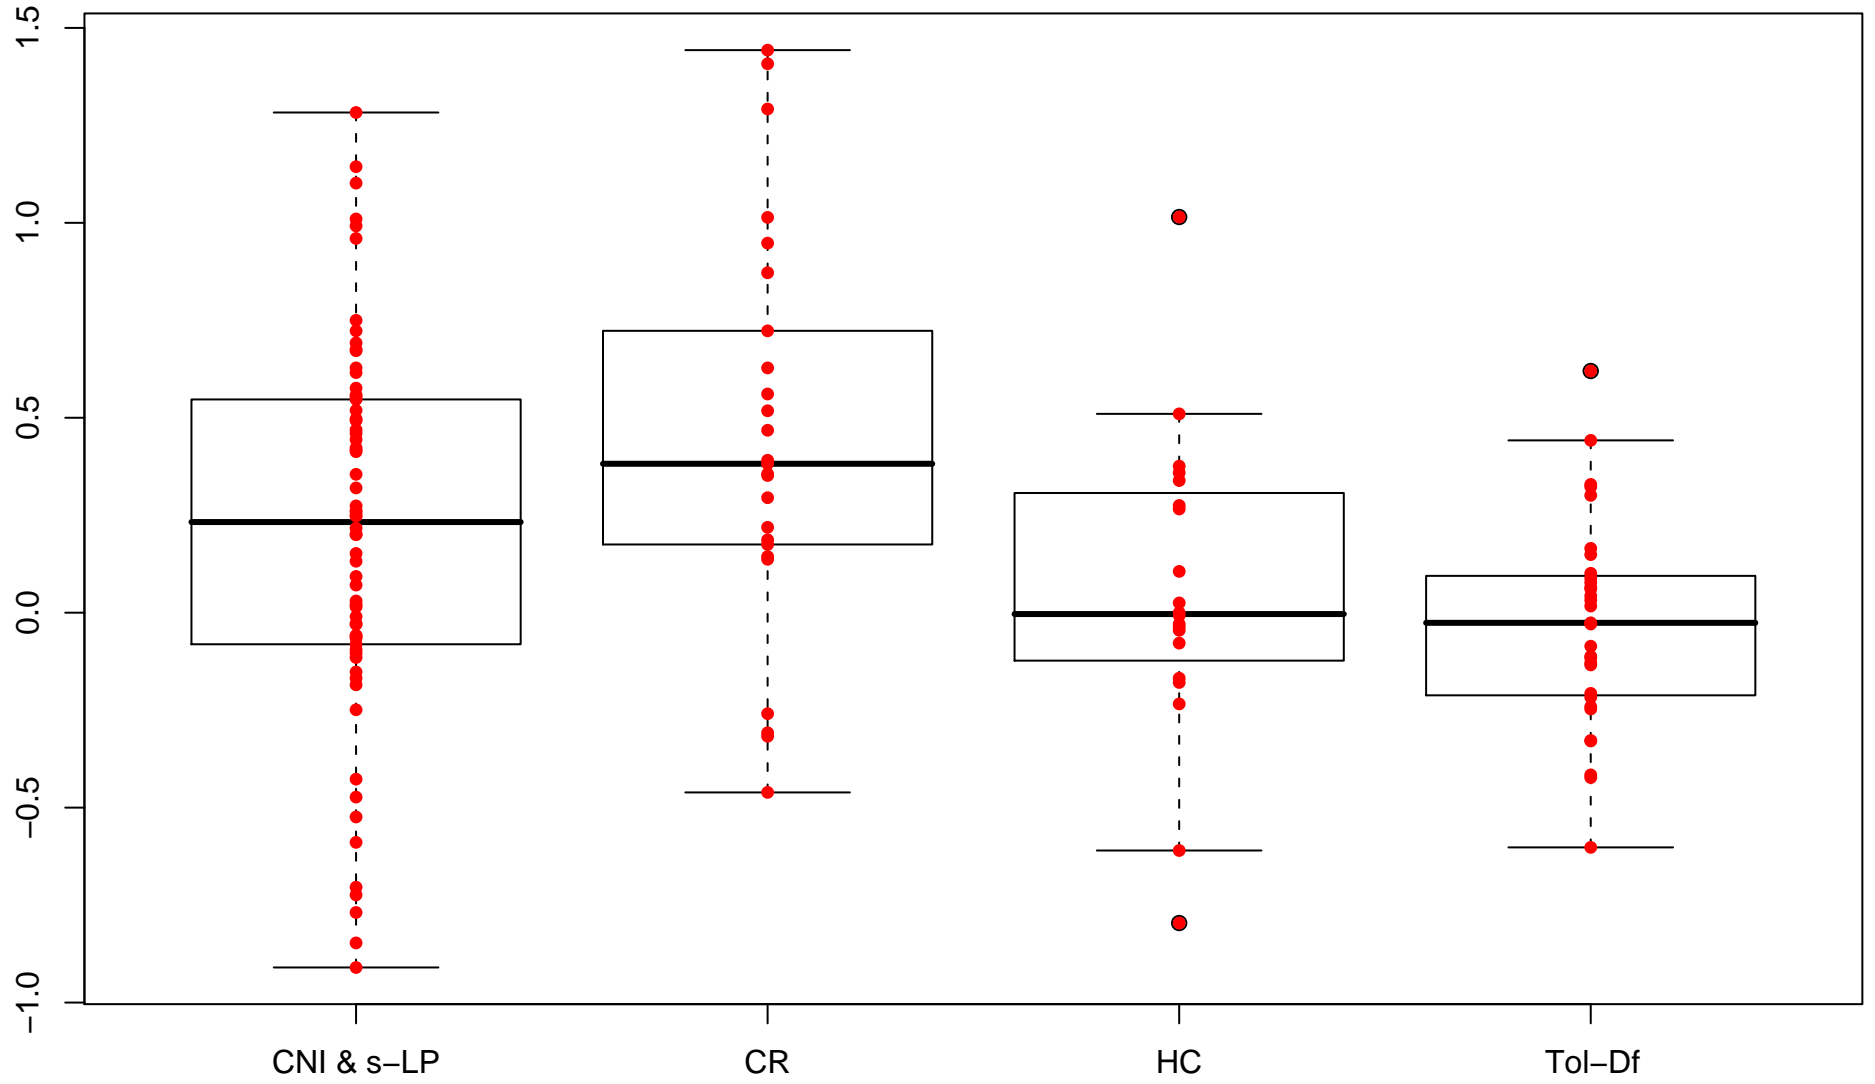

Rank 695 : LILRB2  
0.0008272

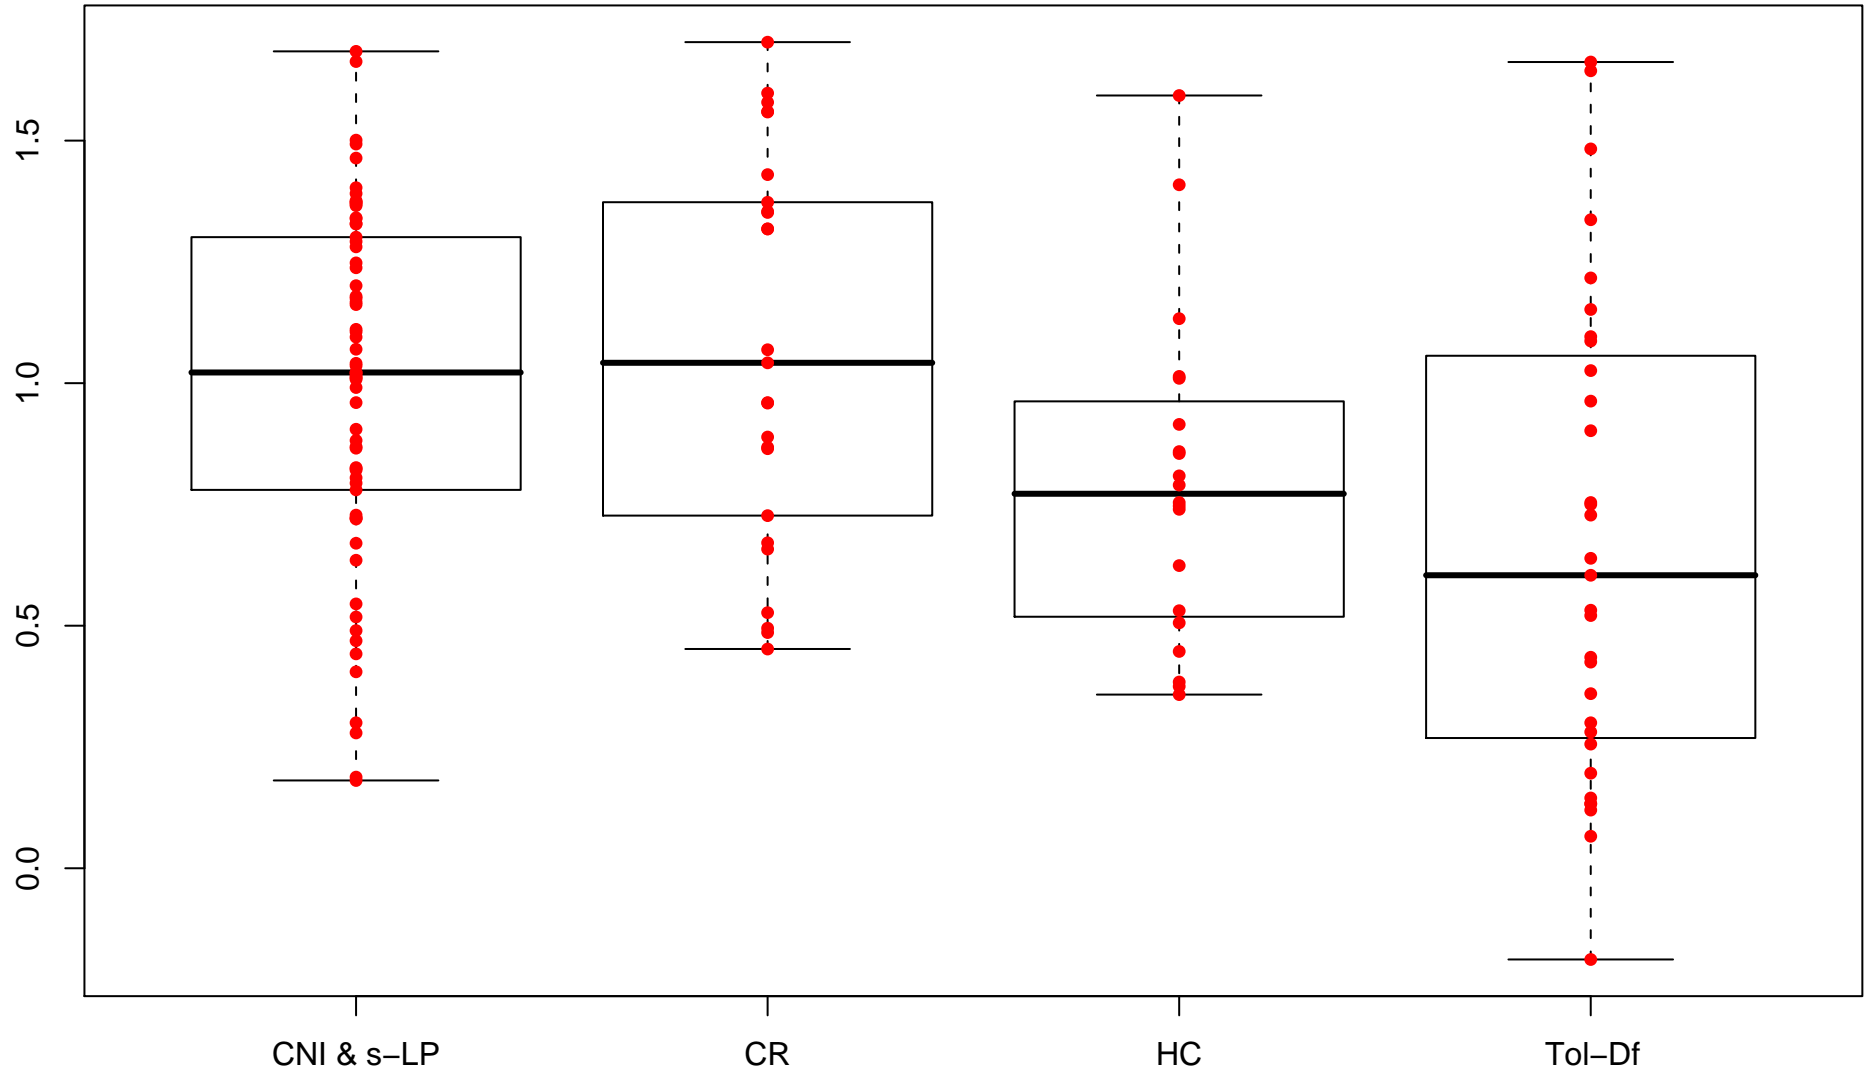



Rank 696 : CCDC46  
0.0008331

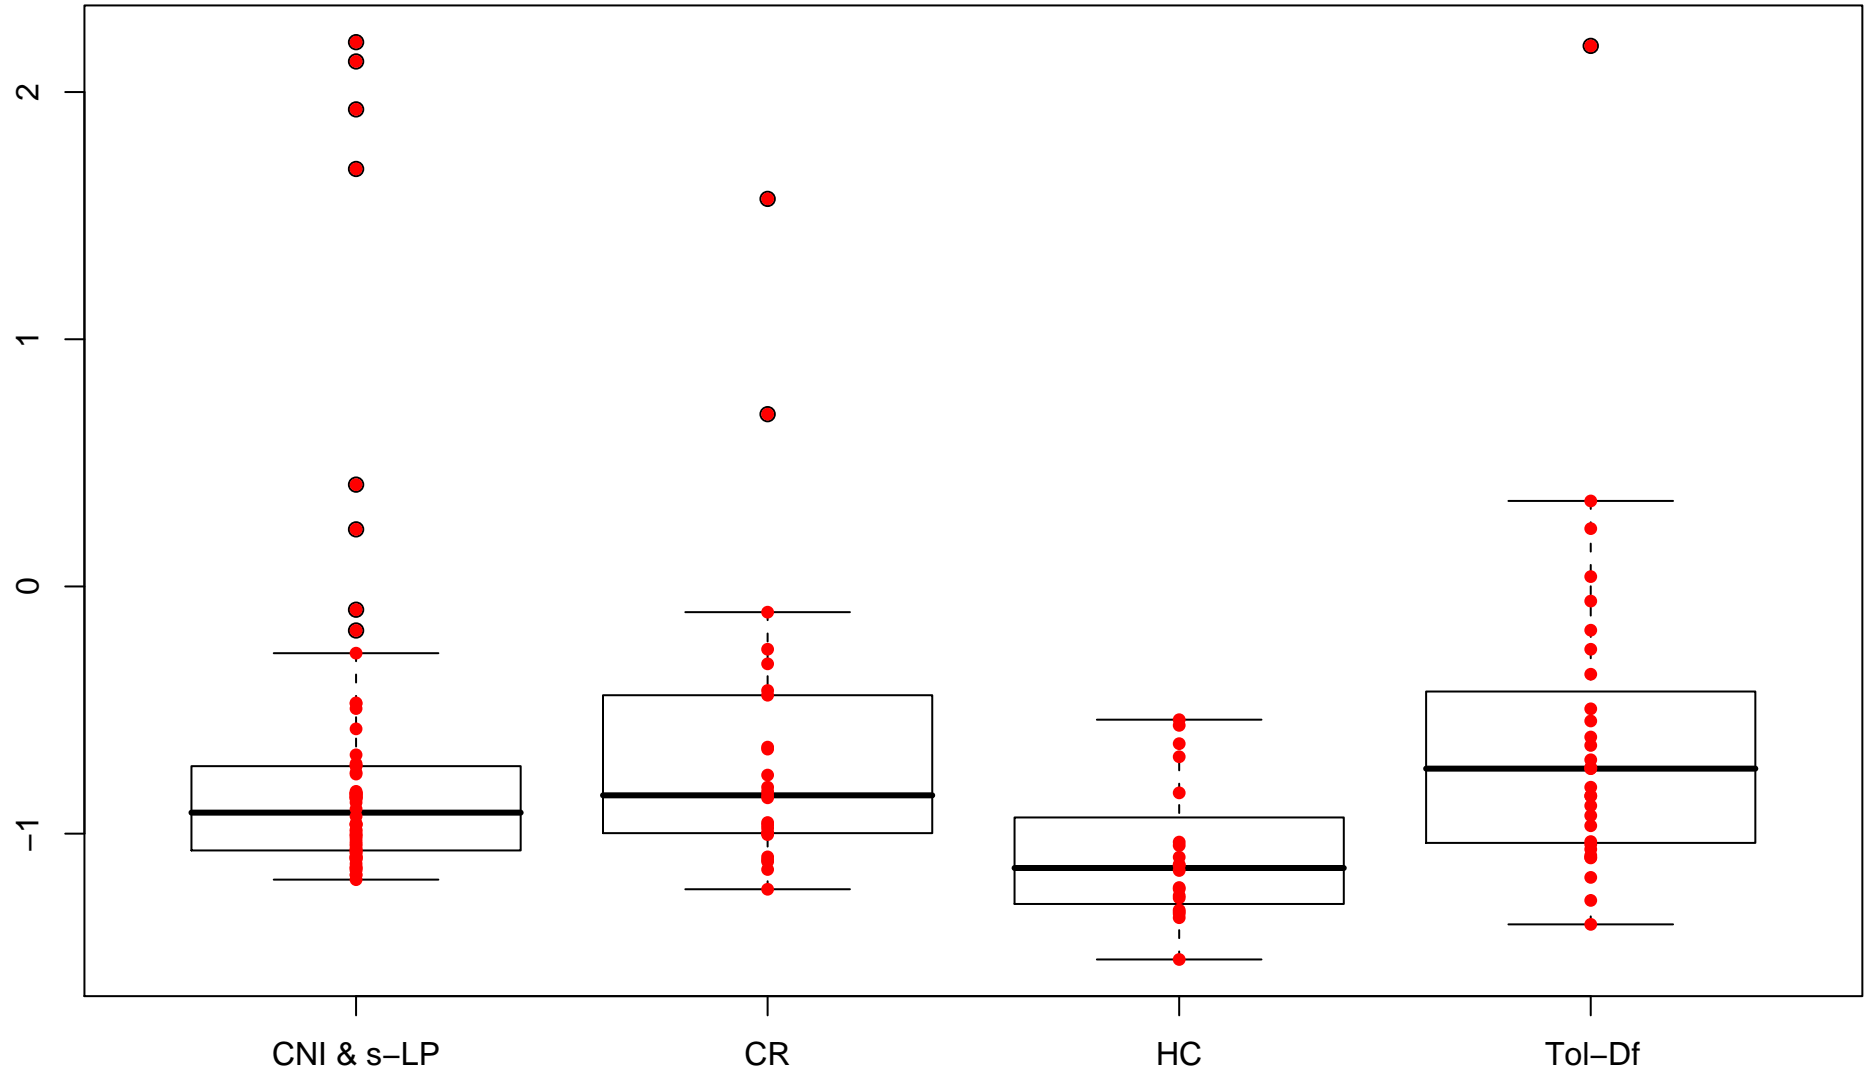

Rank 697 : TTC27  
0.0008374

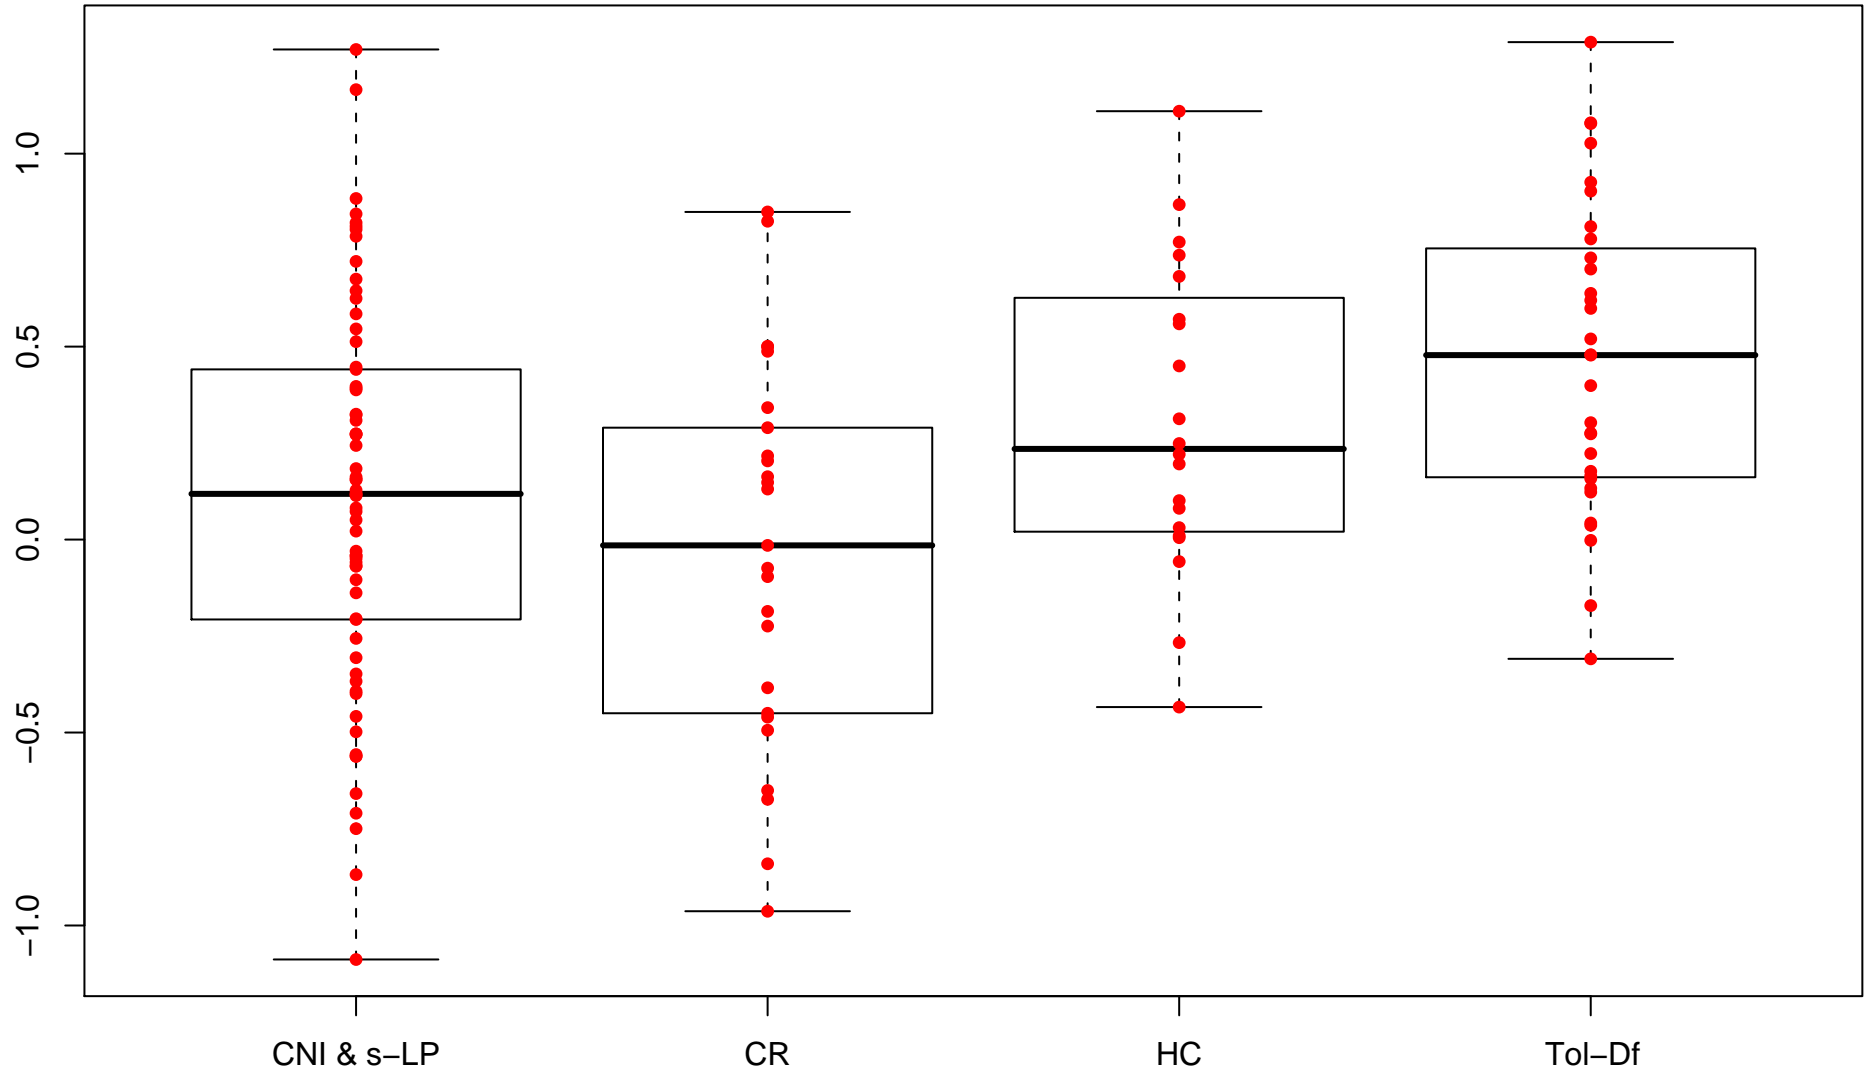

Rank 698 : PDGFB  
0.0008452

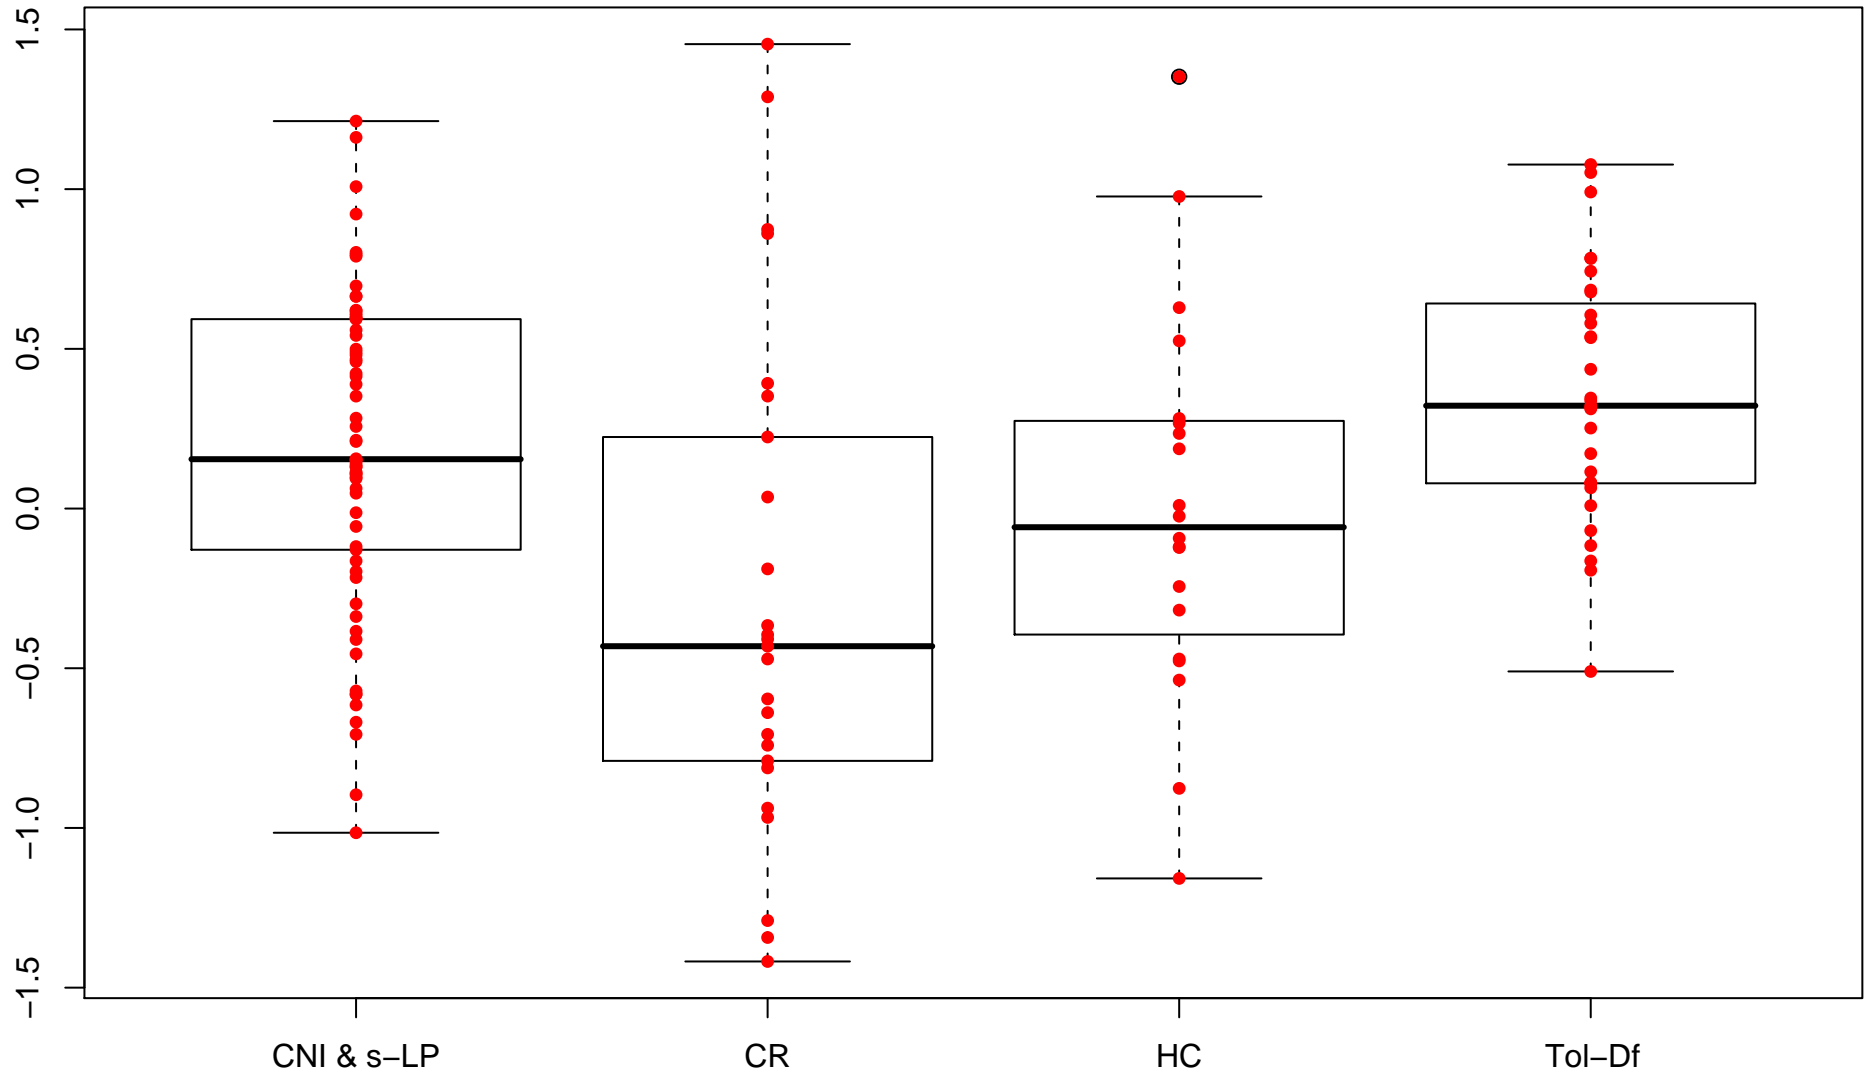

Rank 699 : ZAP70  
0.0008503

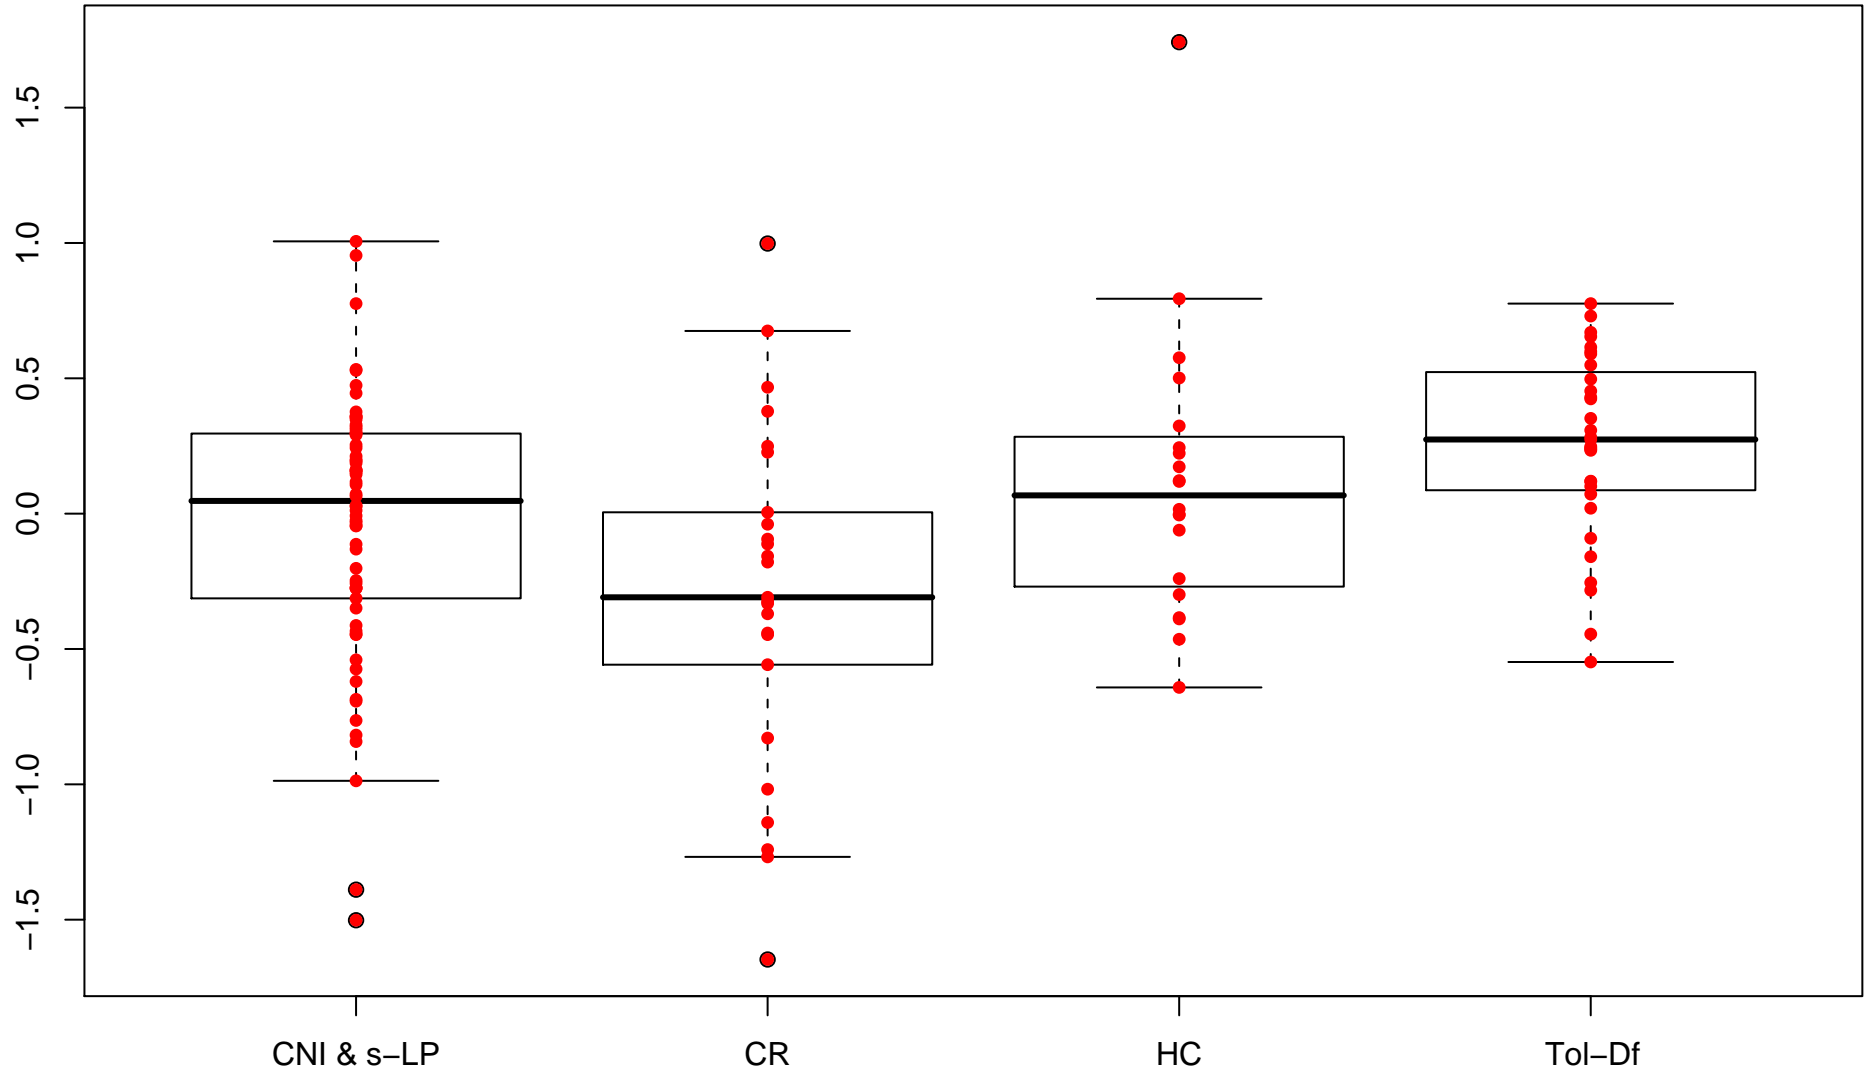

Rank 700 : BCL2L13  
0.0008595

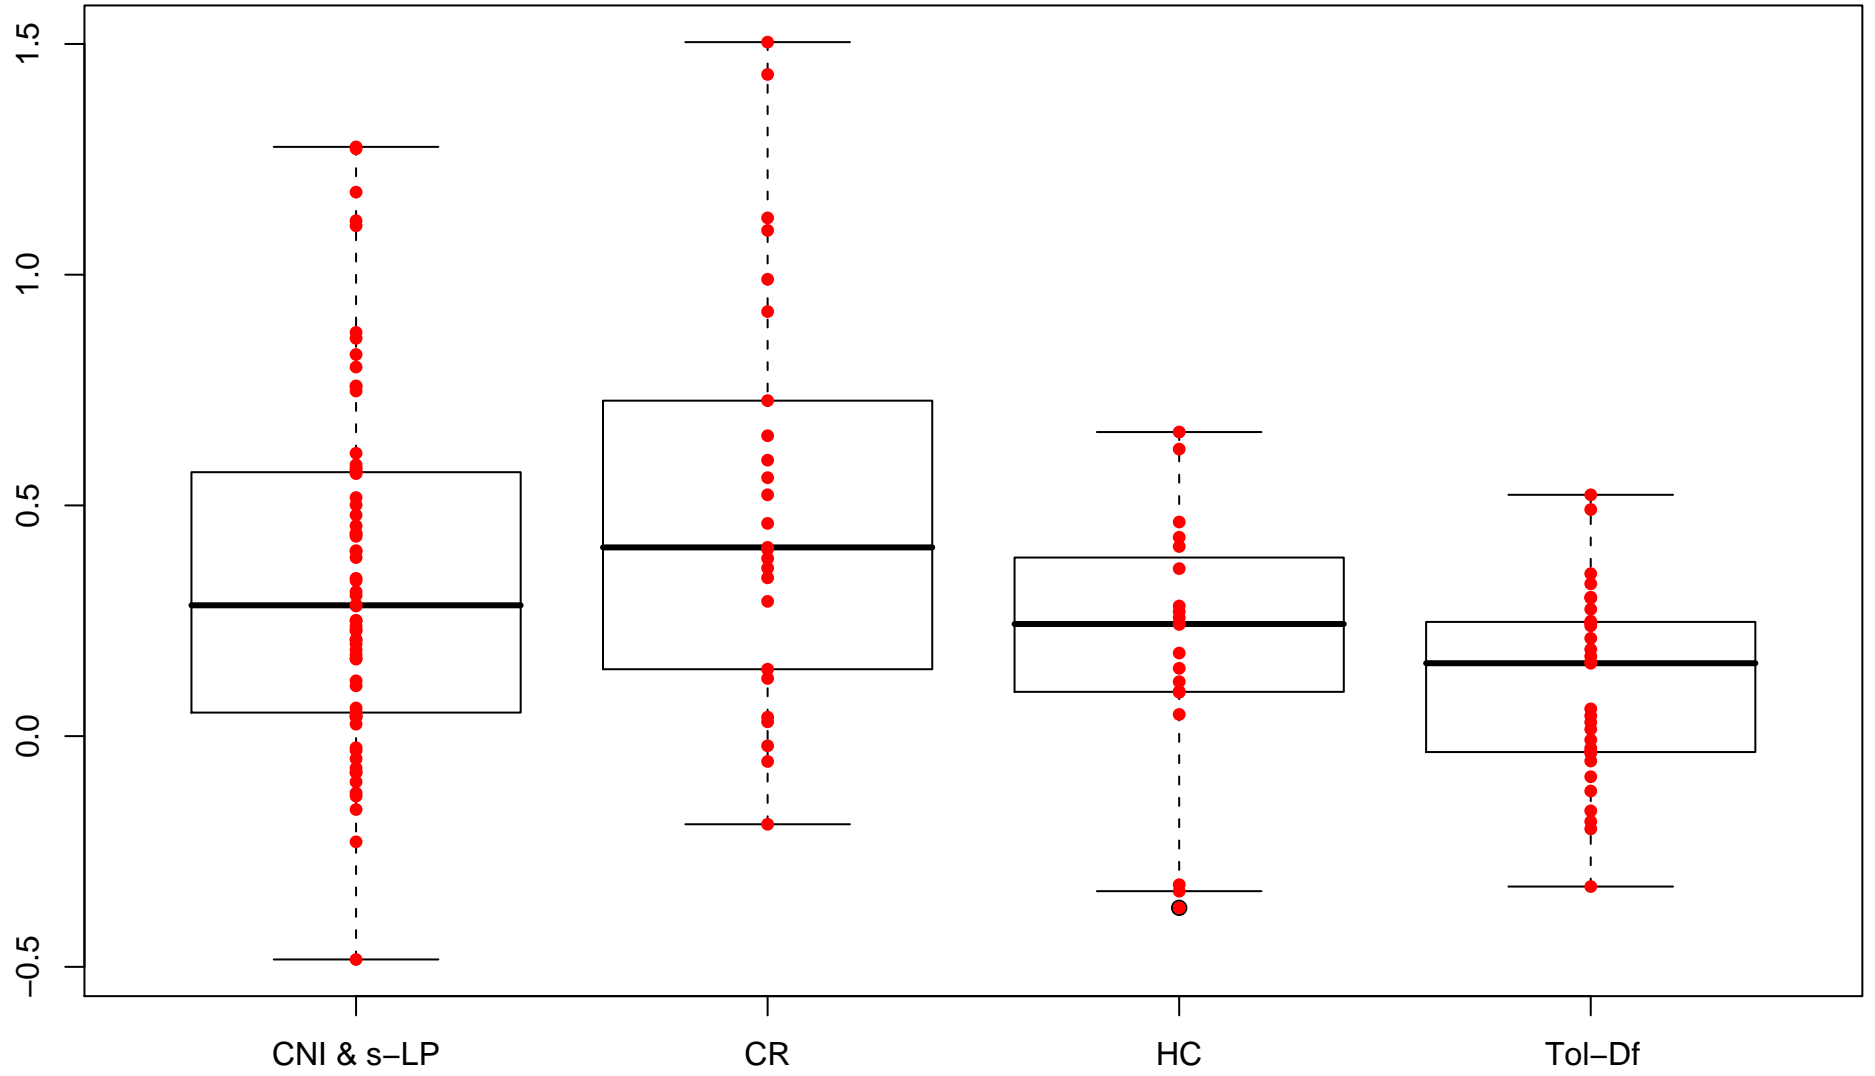

Rank 701 : LOC731062  
0.0008633

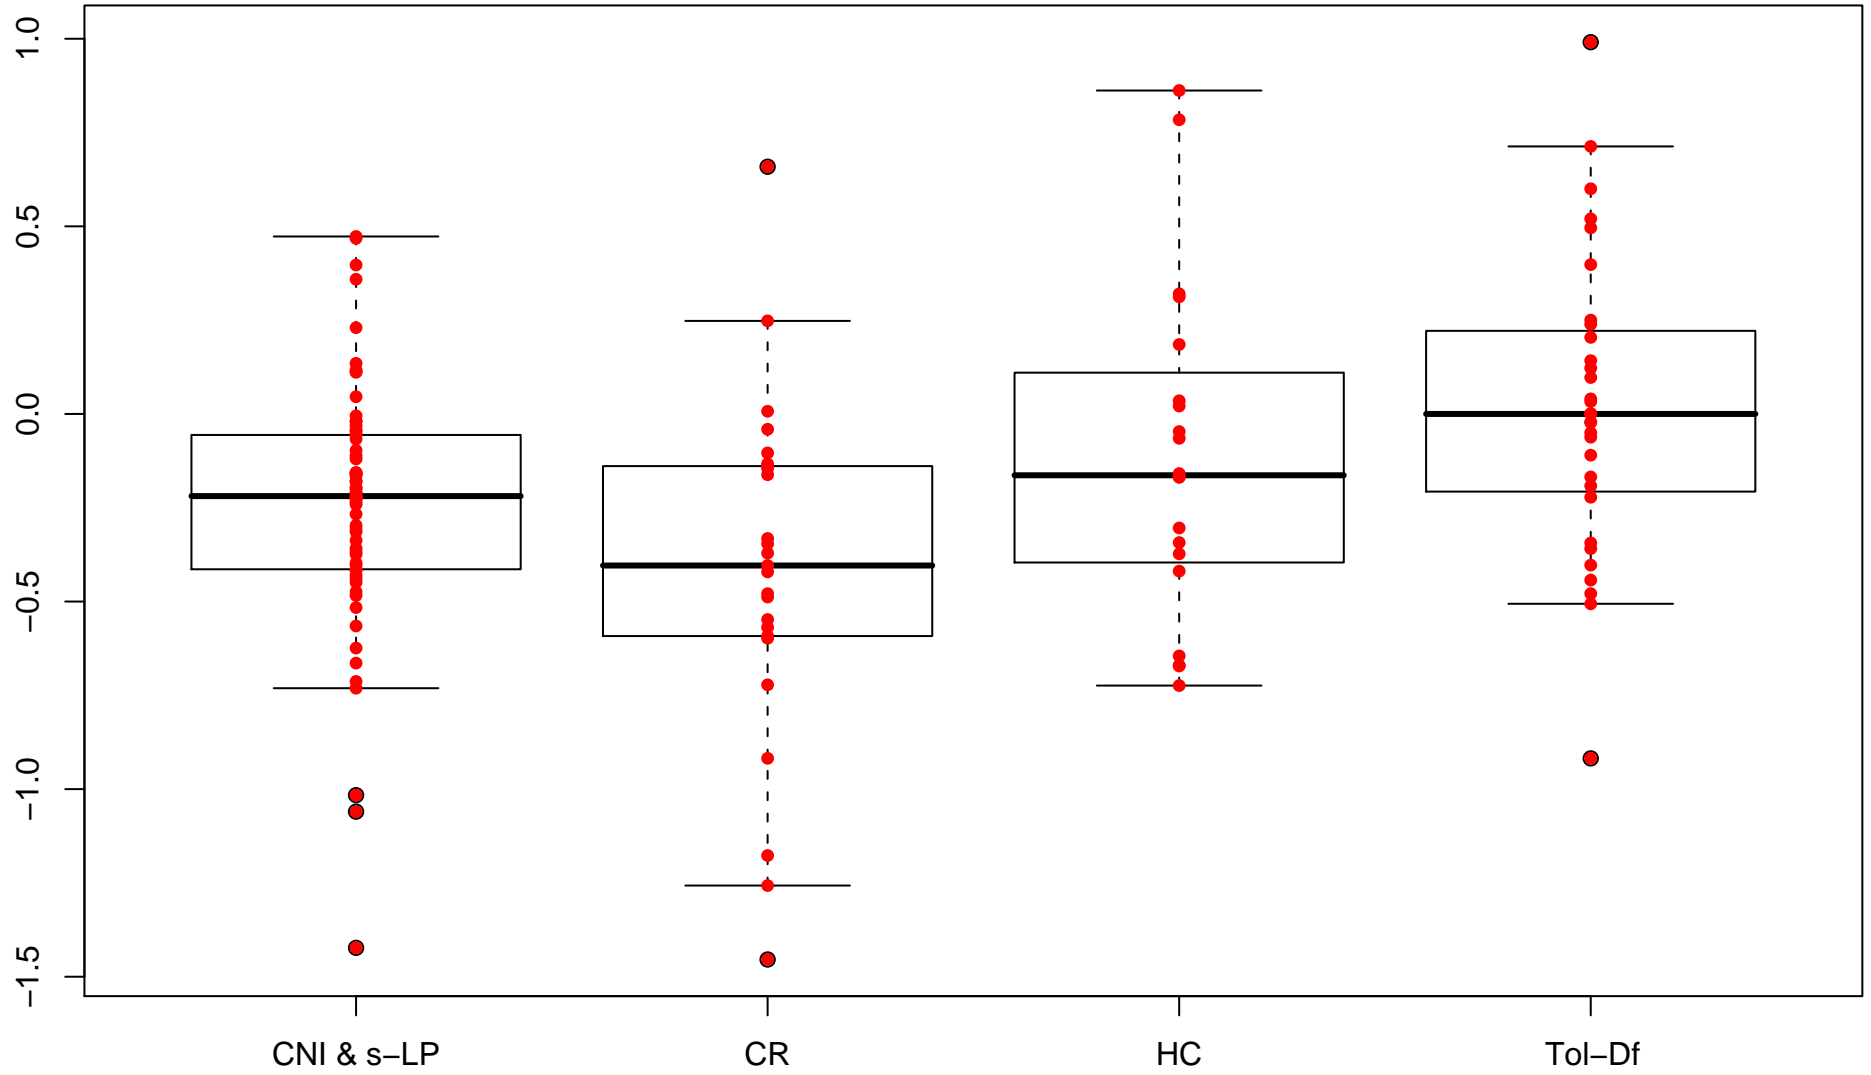

Rank 702 : DEPDC5  
0.0008663

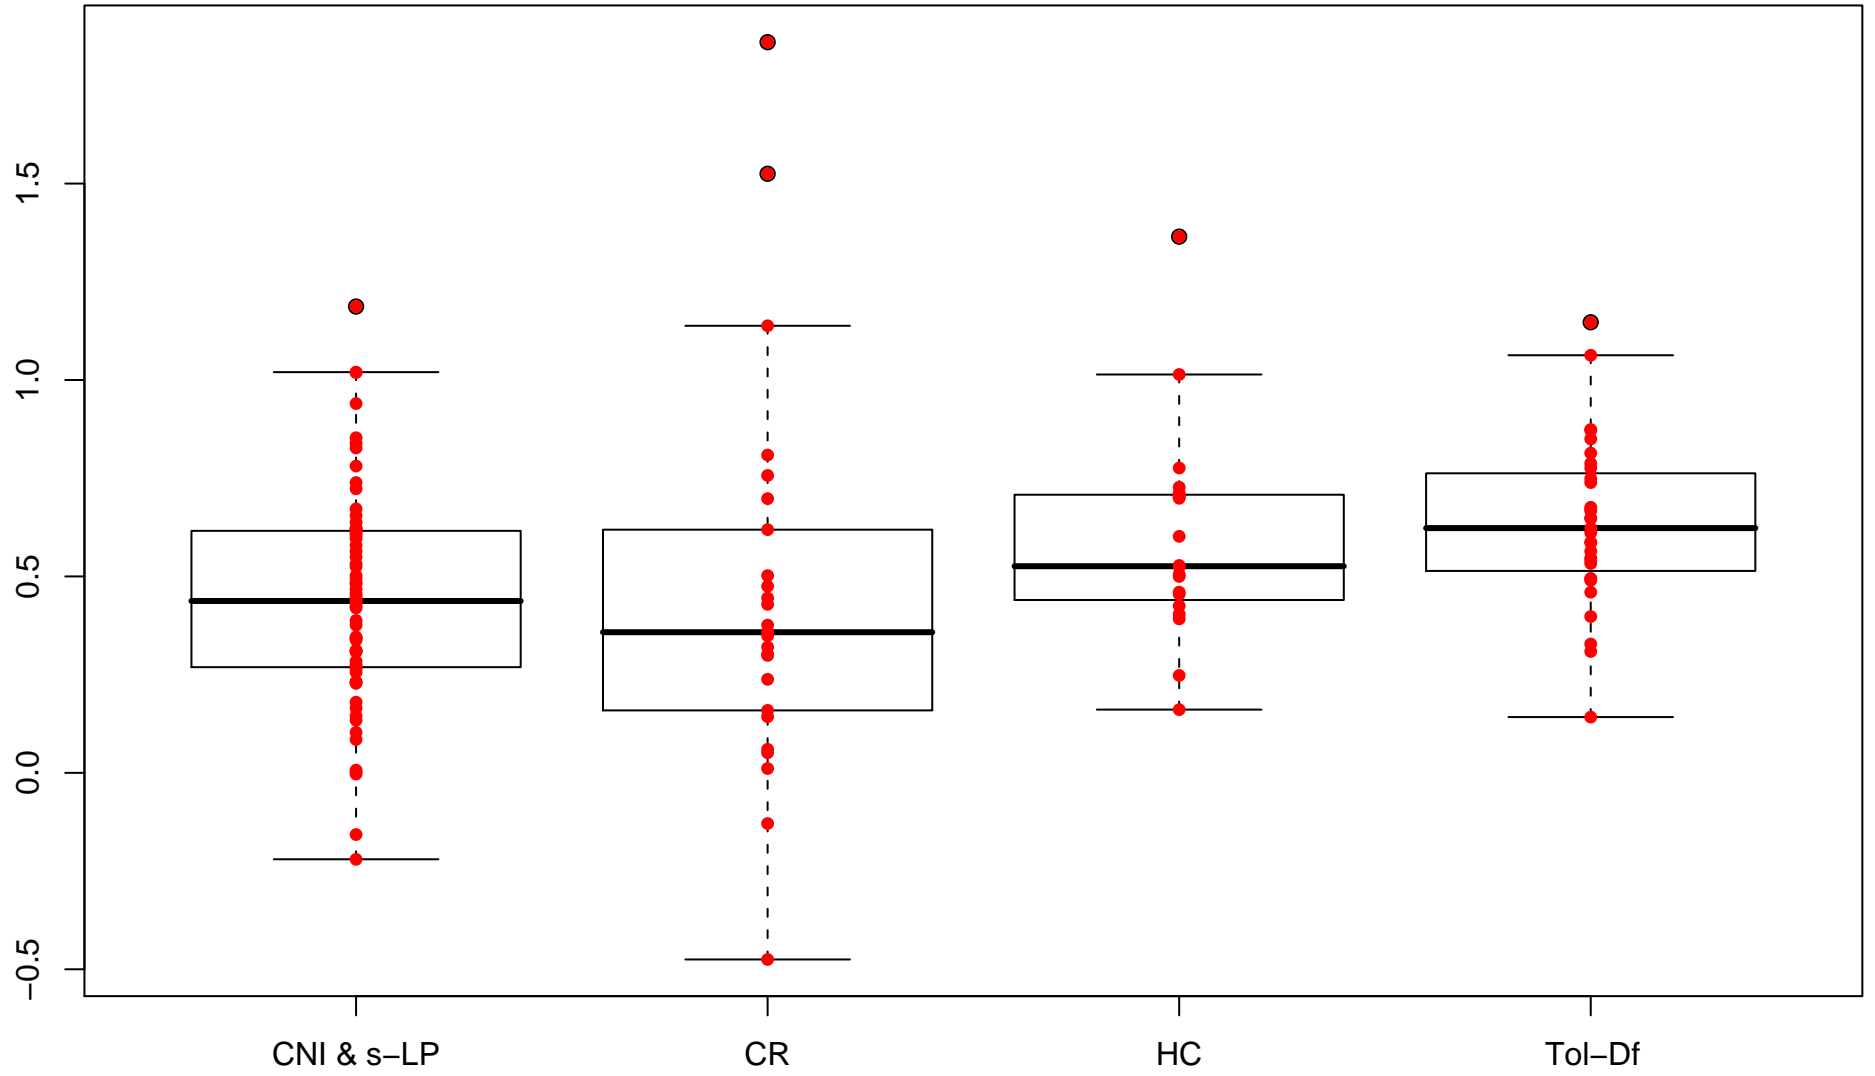

Rank 703 : THC2385462  
0.0008663

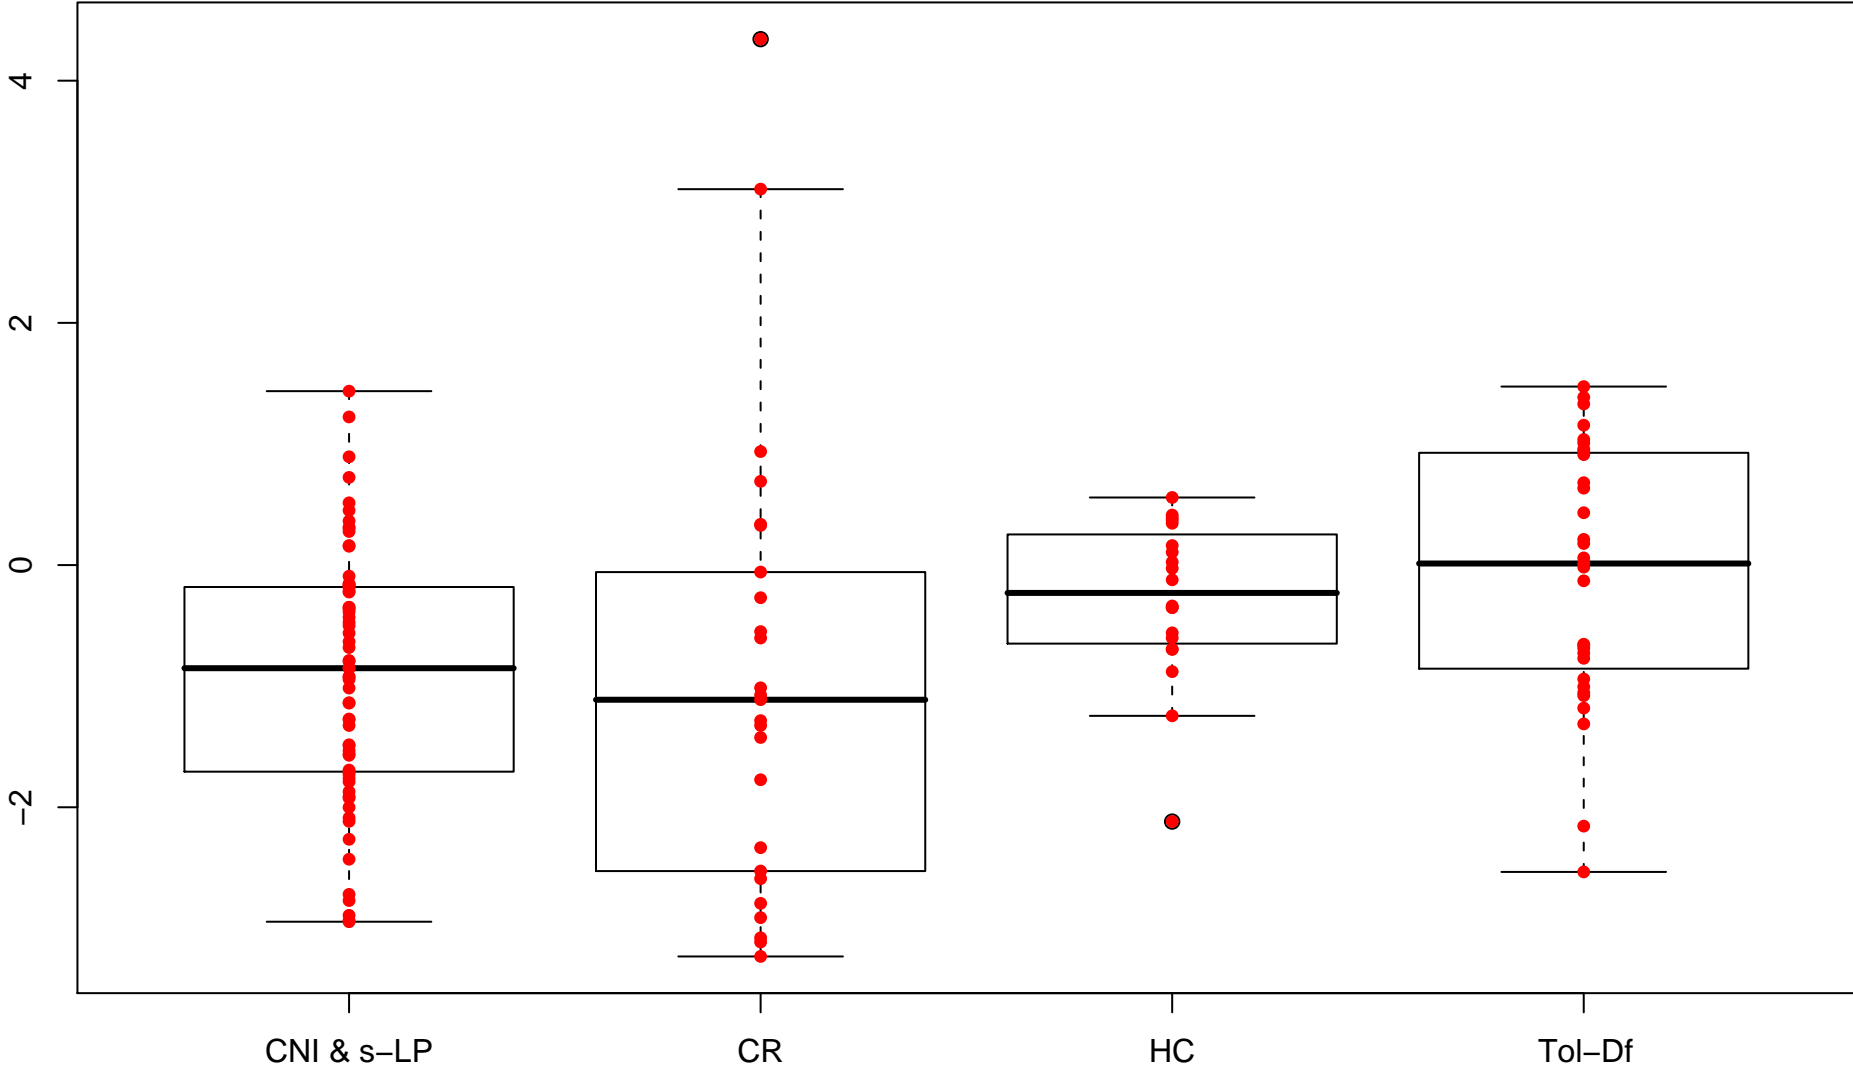



Rank 704 : CKS1B  
0.0008684

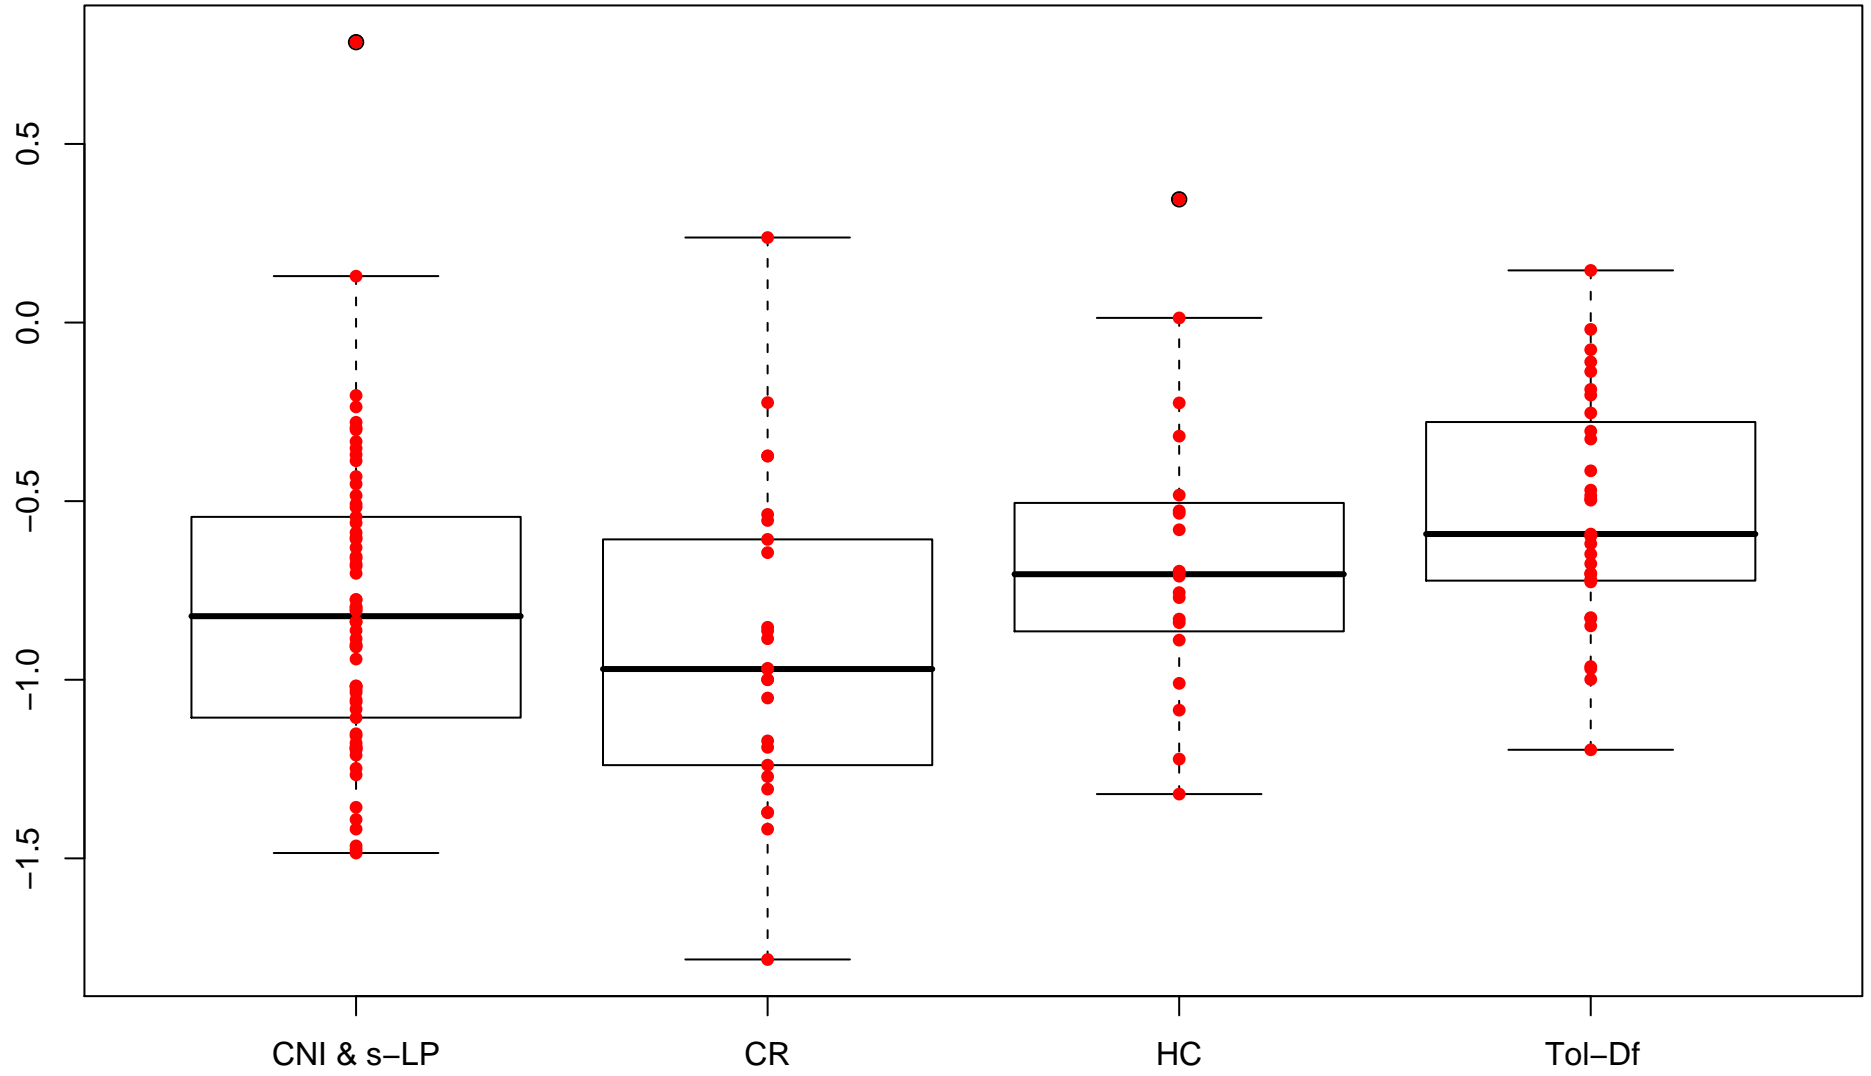

Rank 705 : ADAMTS7;LOC388194;LOC390660;LOC400406;LOC400419;LOC441730;LOC642935  
0.000871

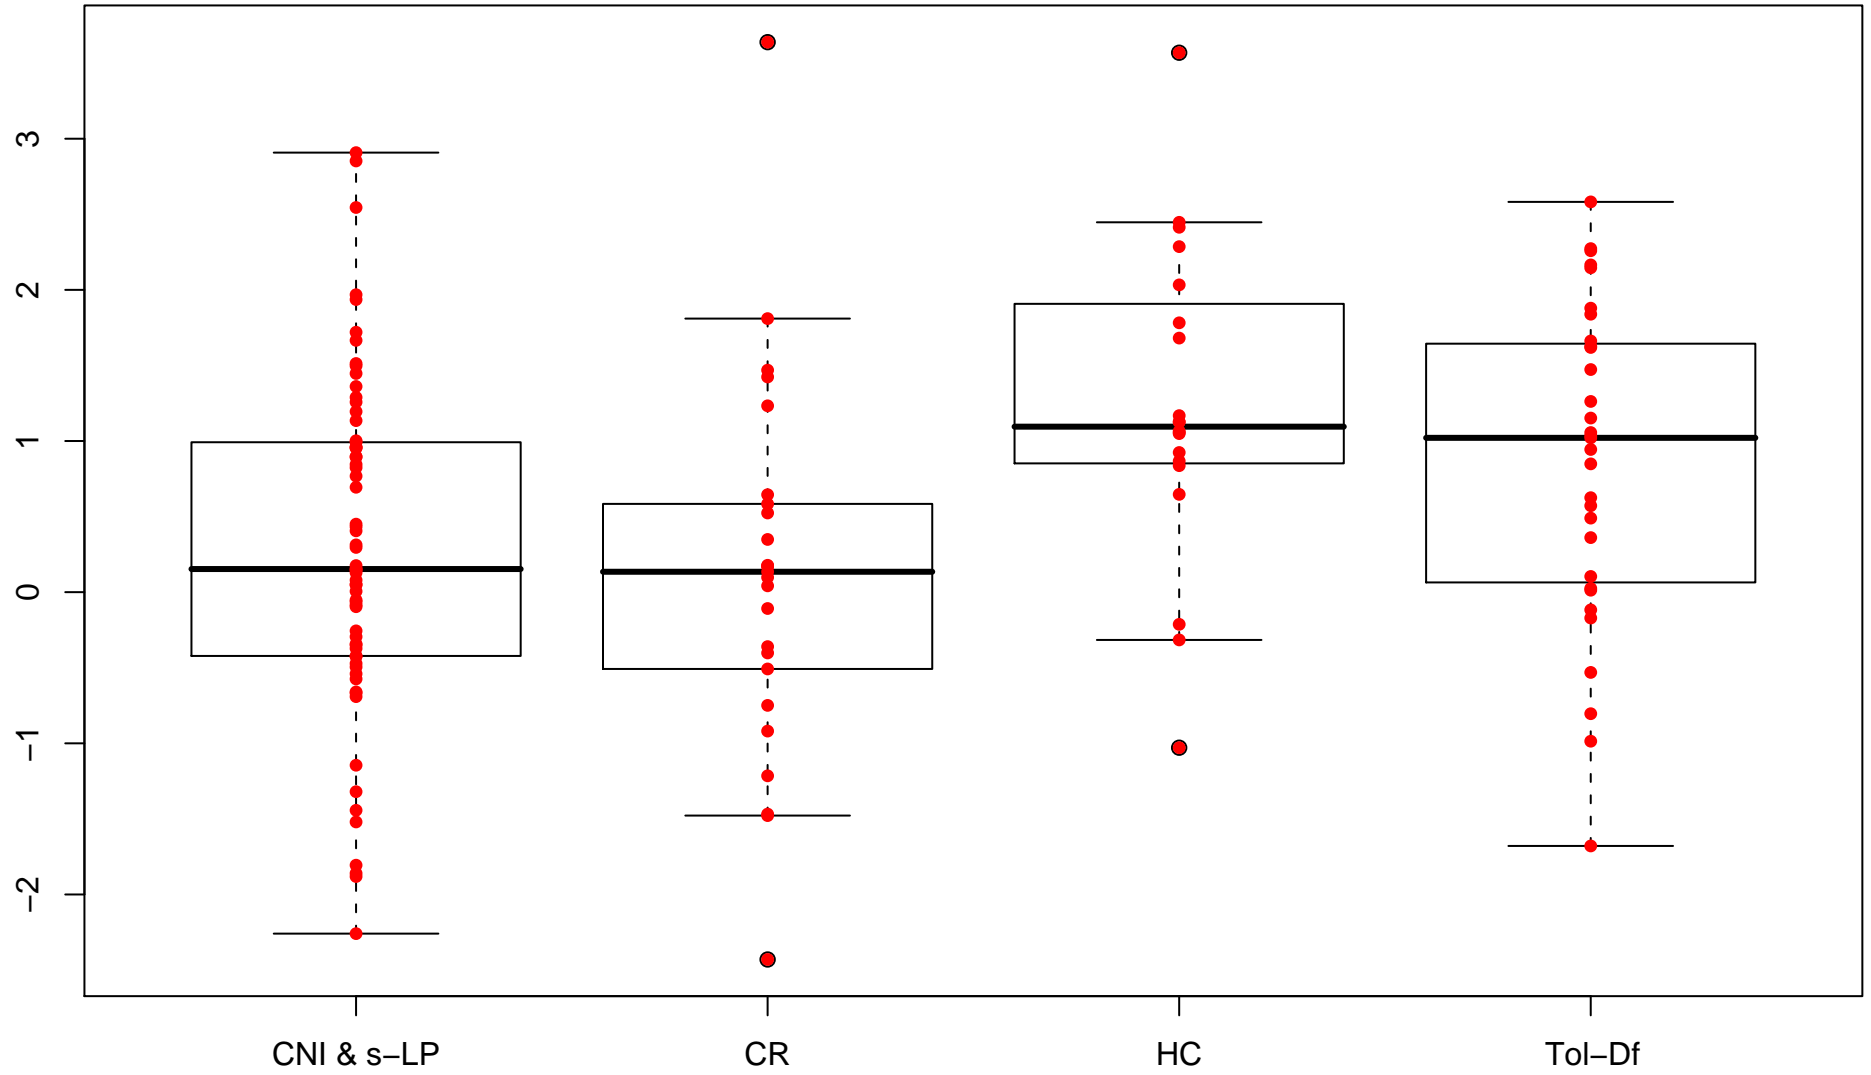

Rank 706 : SLC2A3  
0.0008738

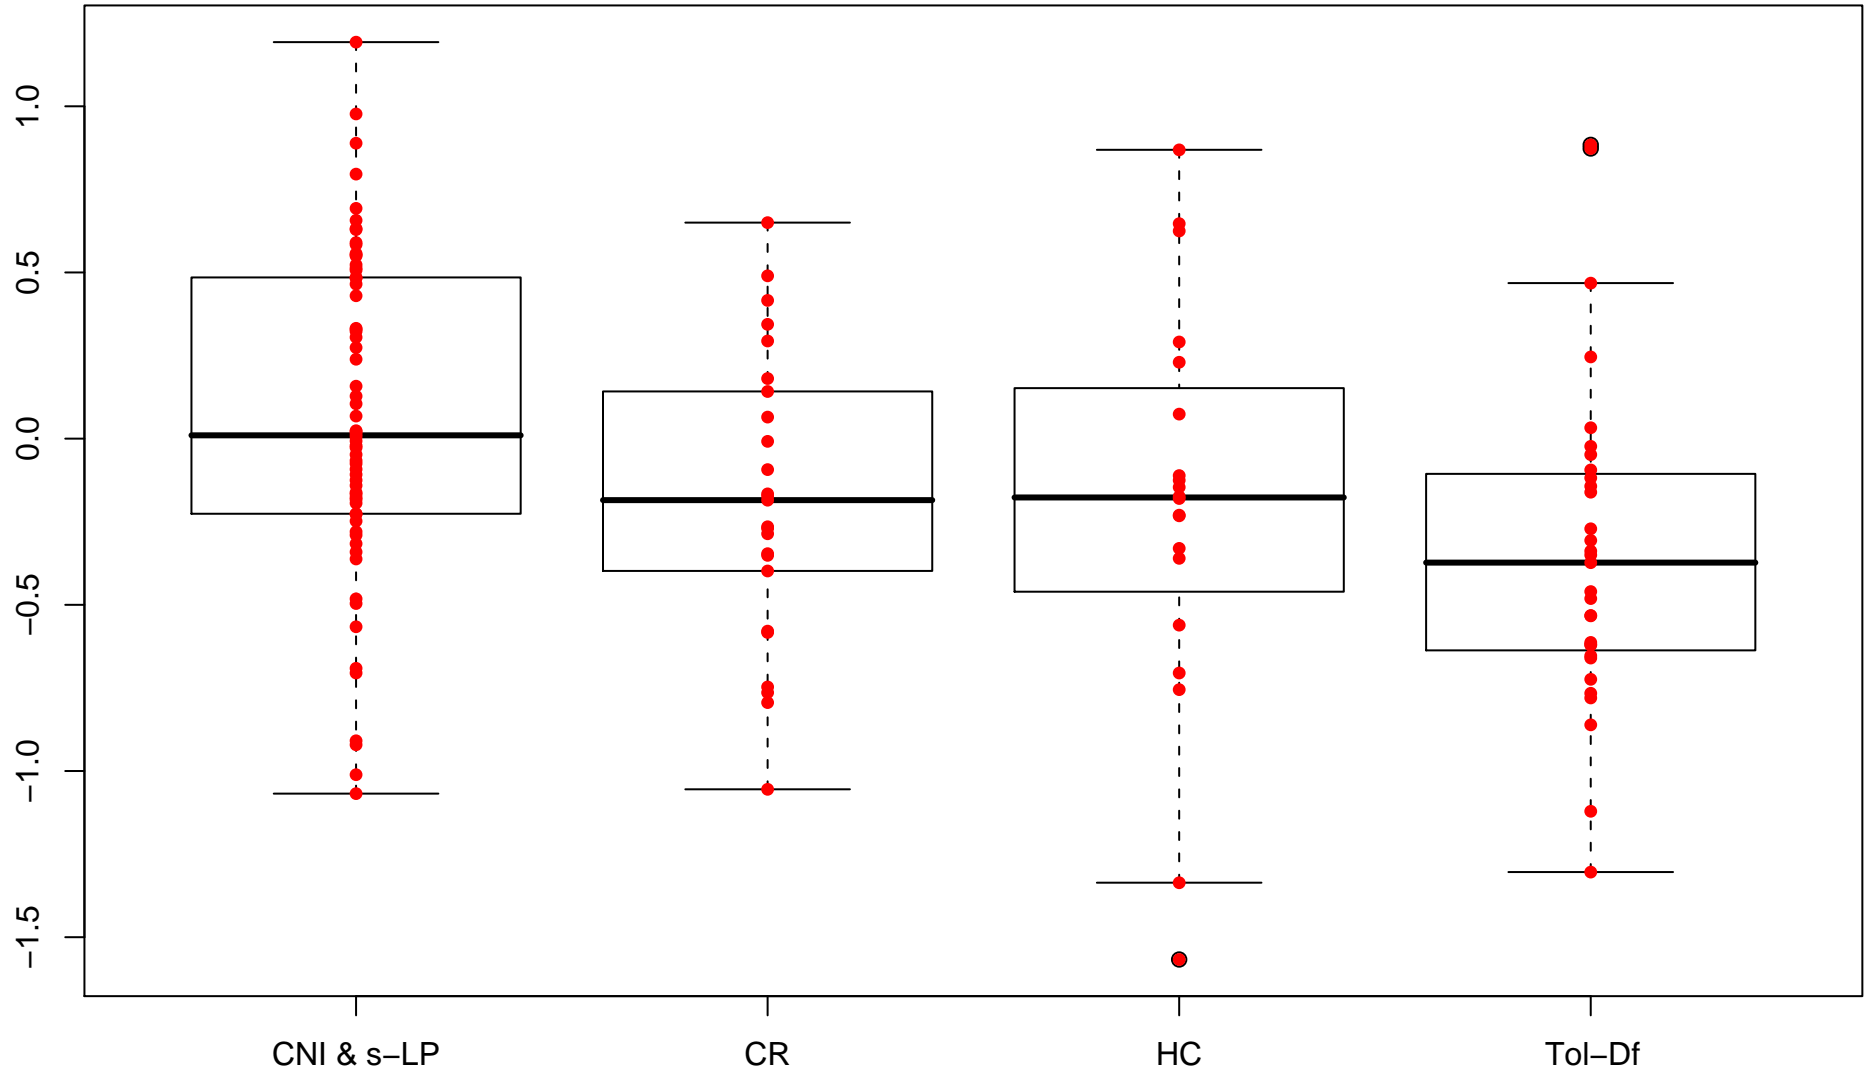

Rank 707 : ZAK  
0.0008759

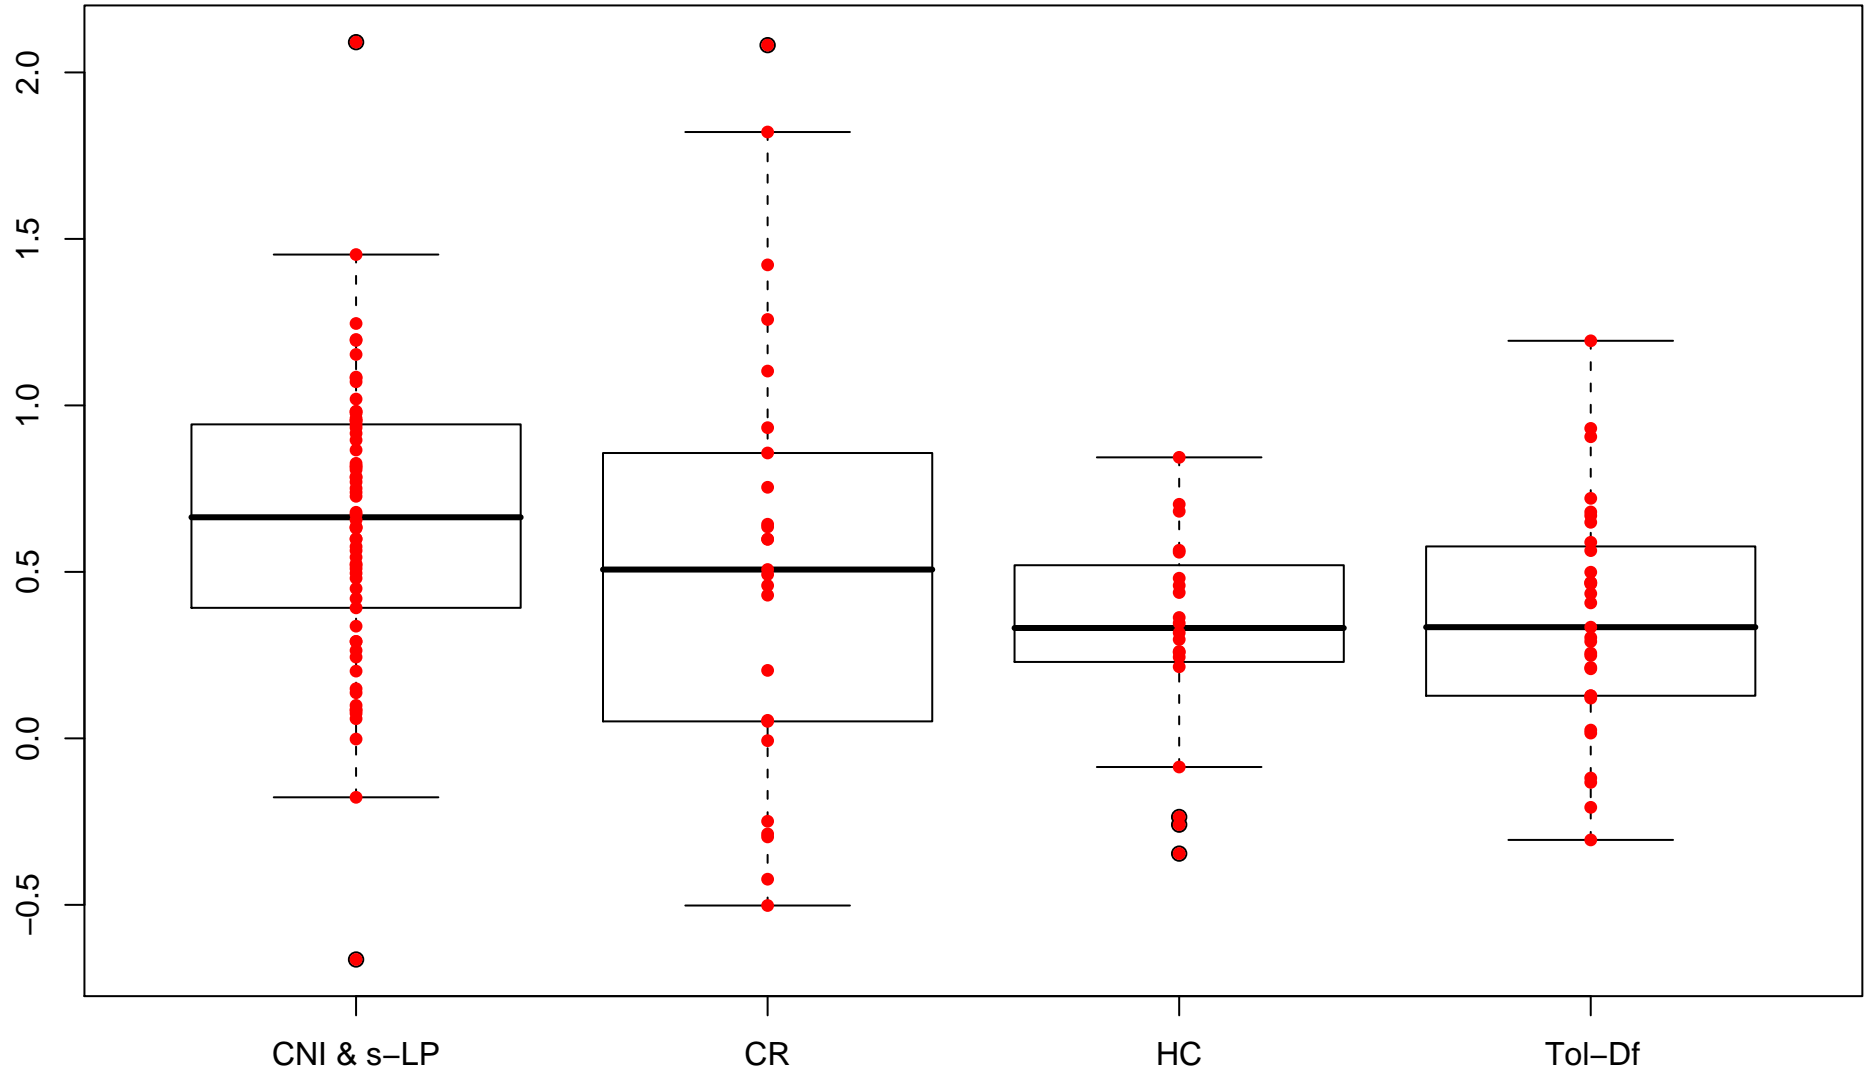

Rank 708 : KIAA0494  
0.0008774

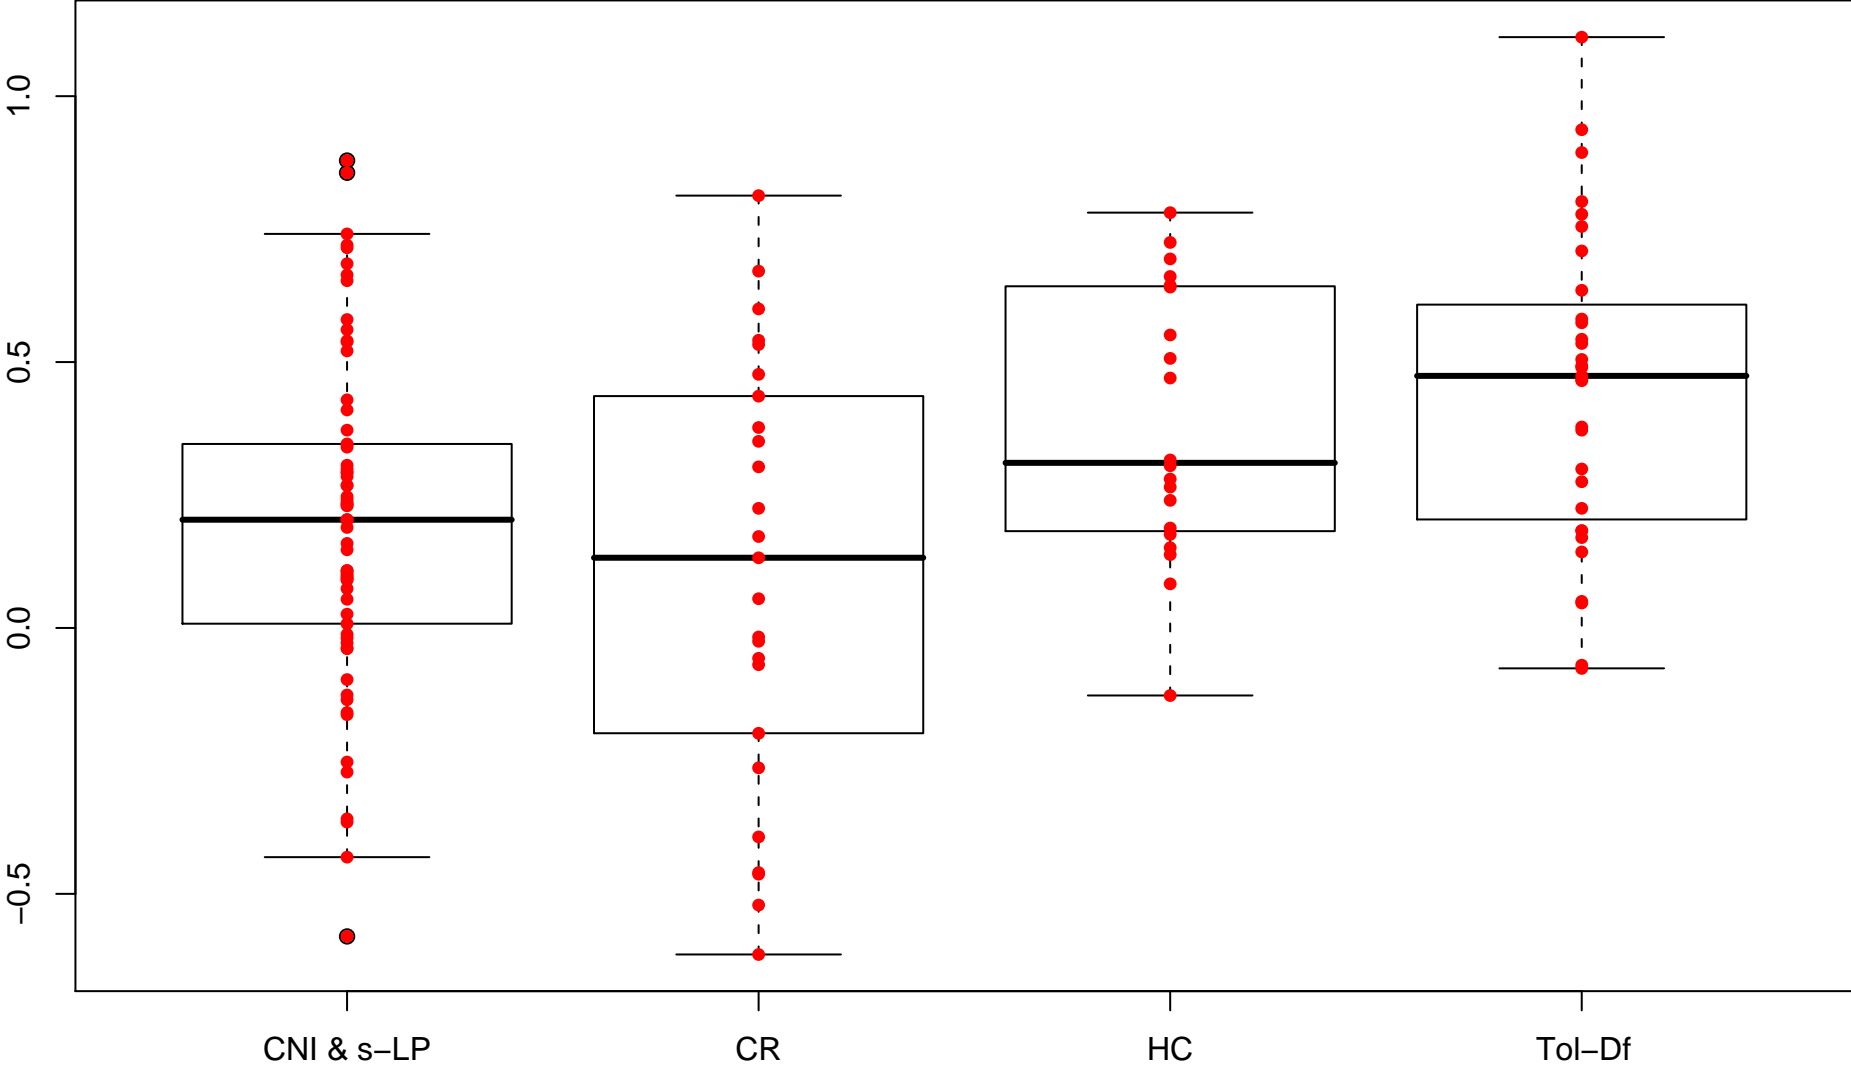

Rank 709 : MFAP1  
0.0008795

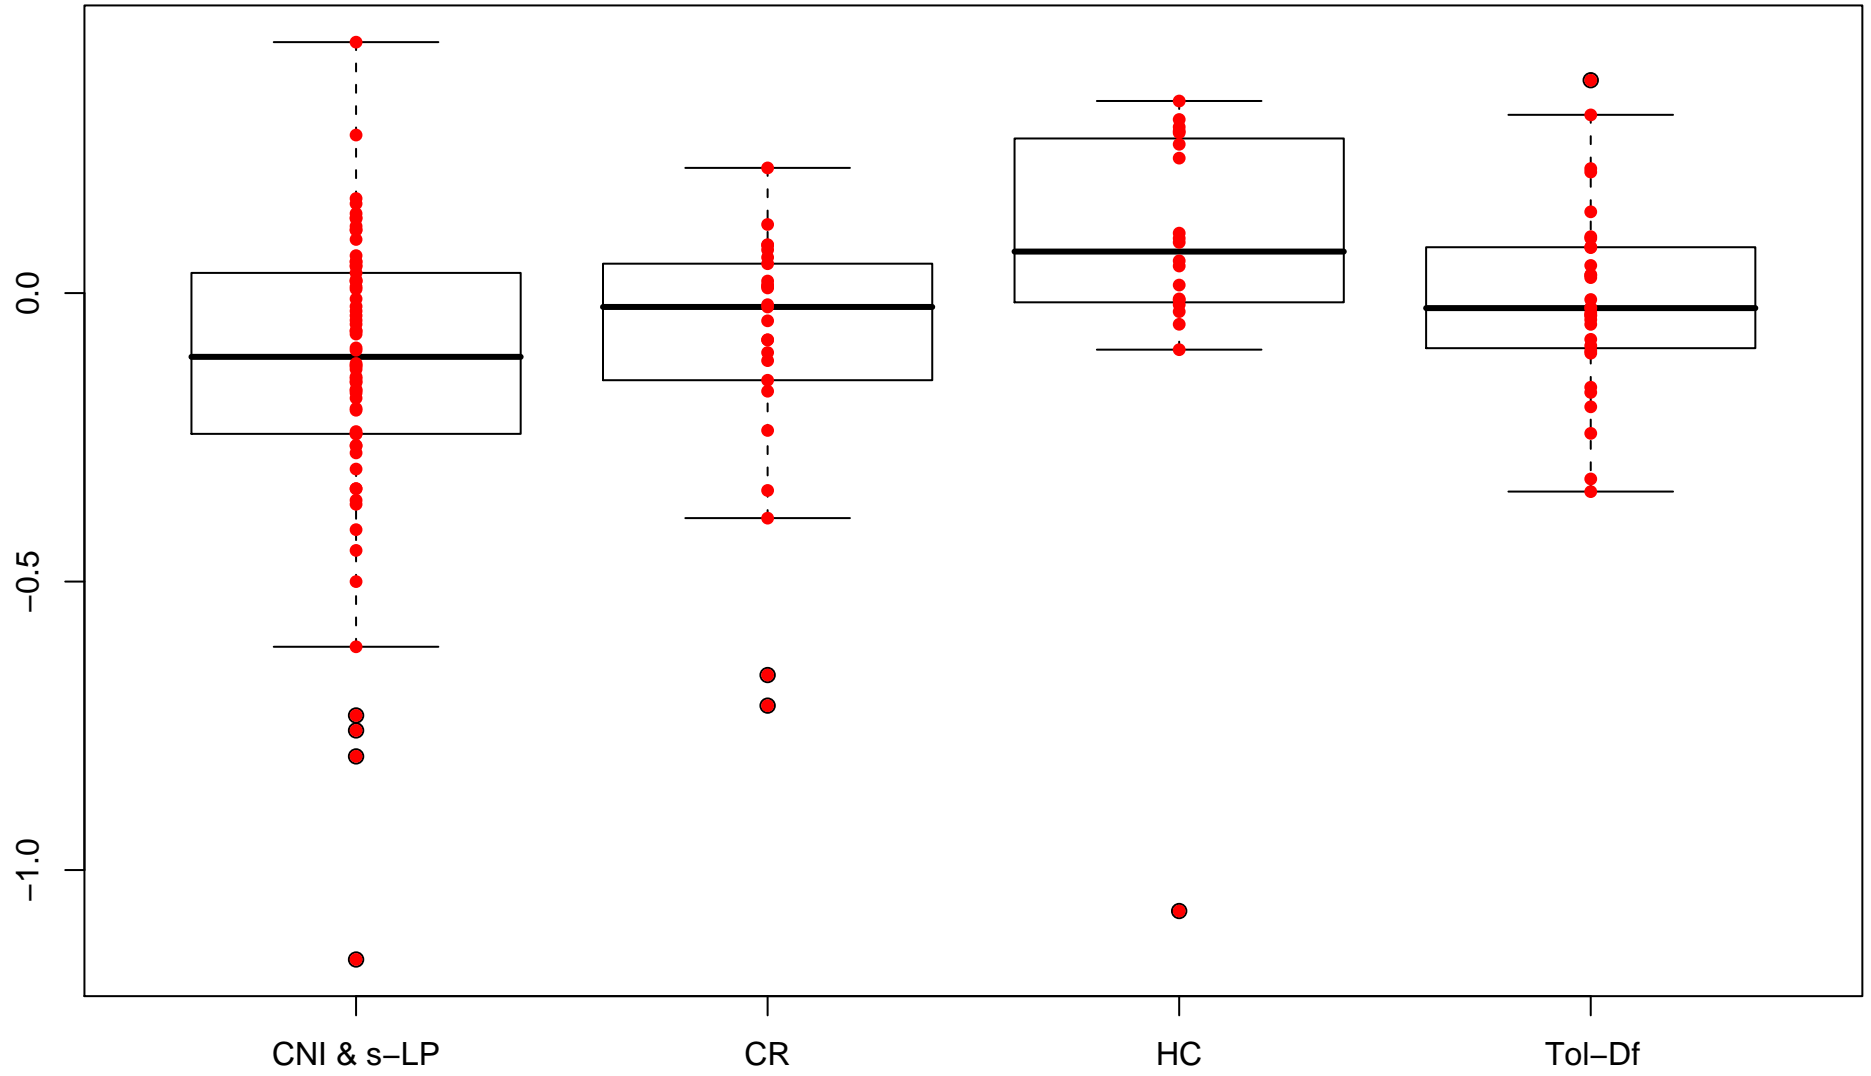

Rank 710 : USP45  
0.0008855

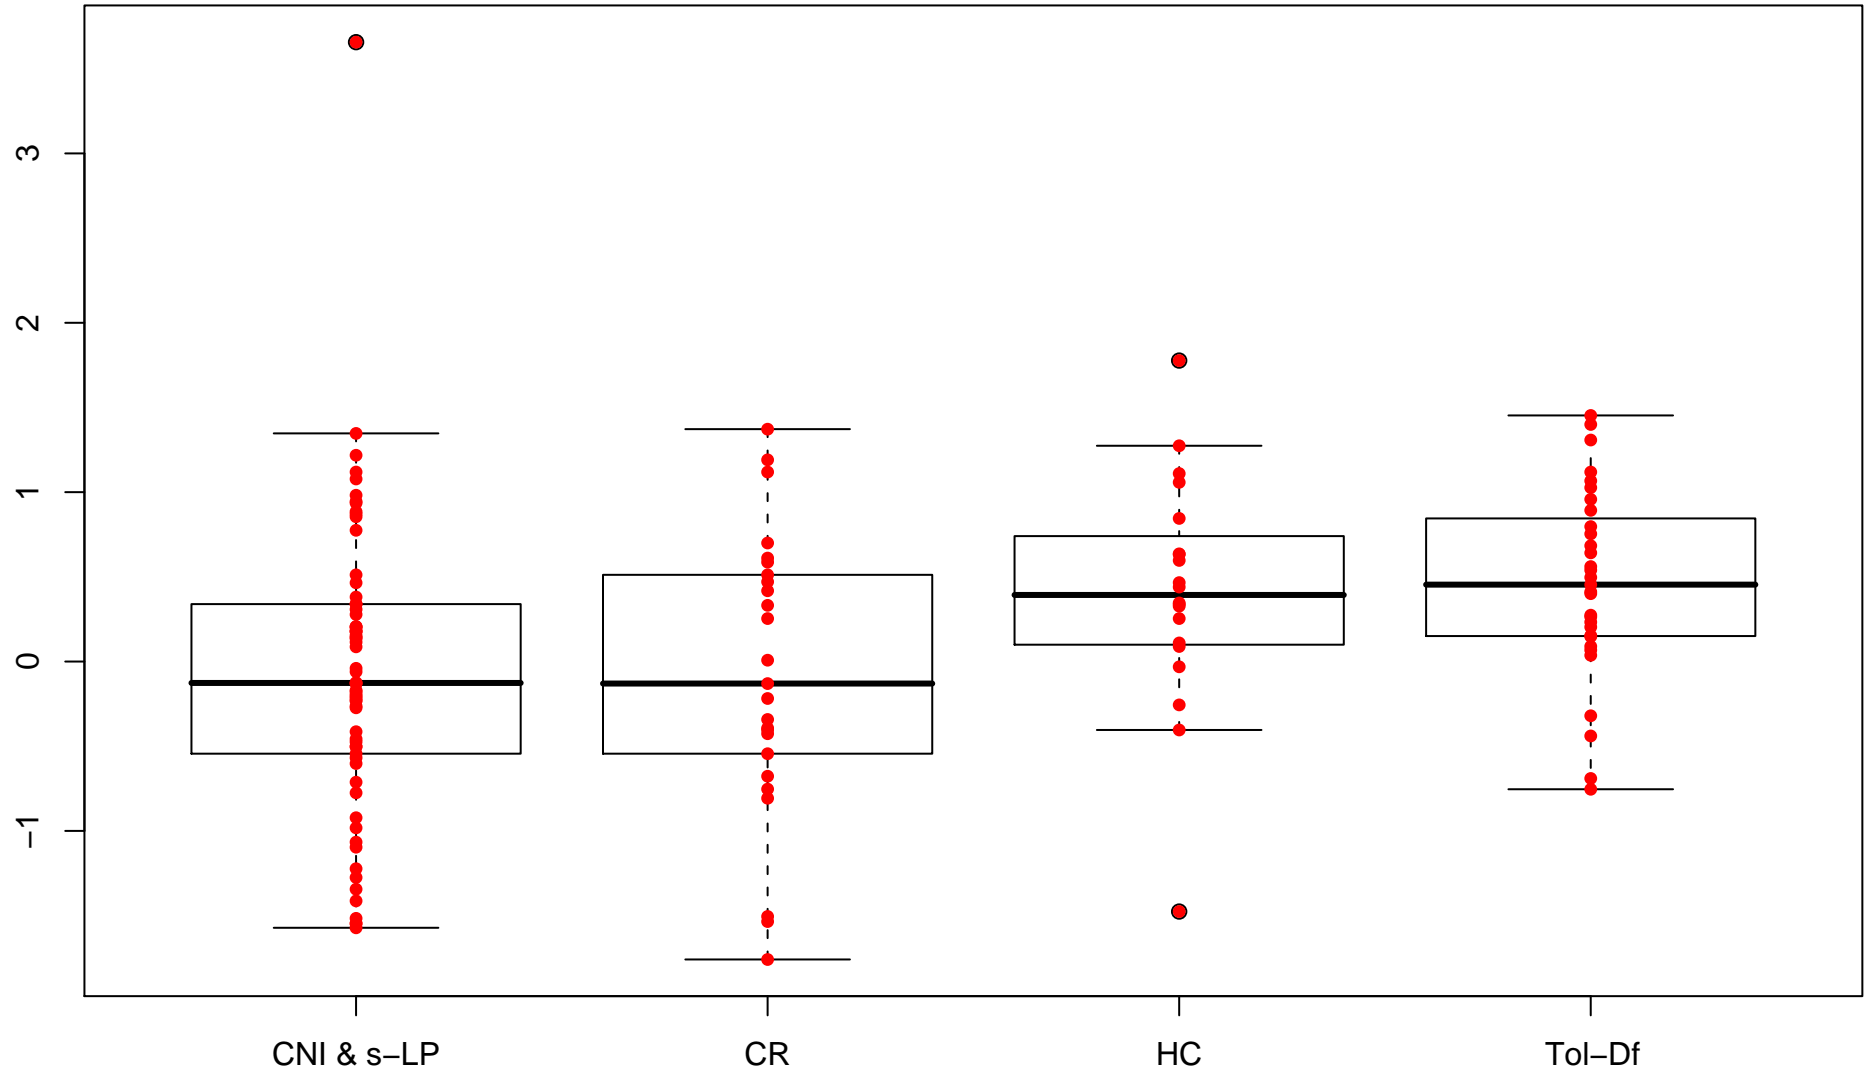

Rank 711 : LOC283788  
0.0008871

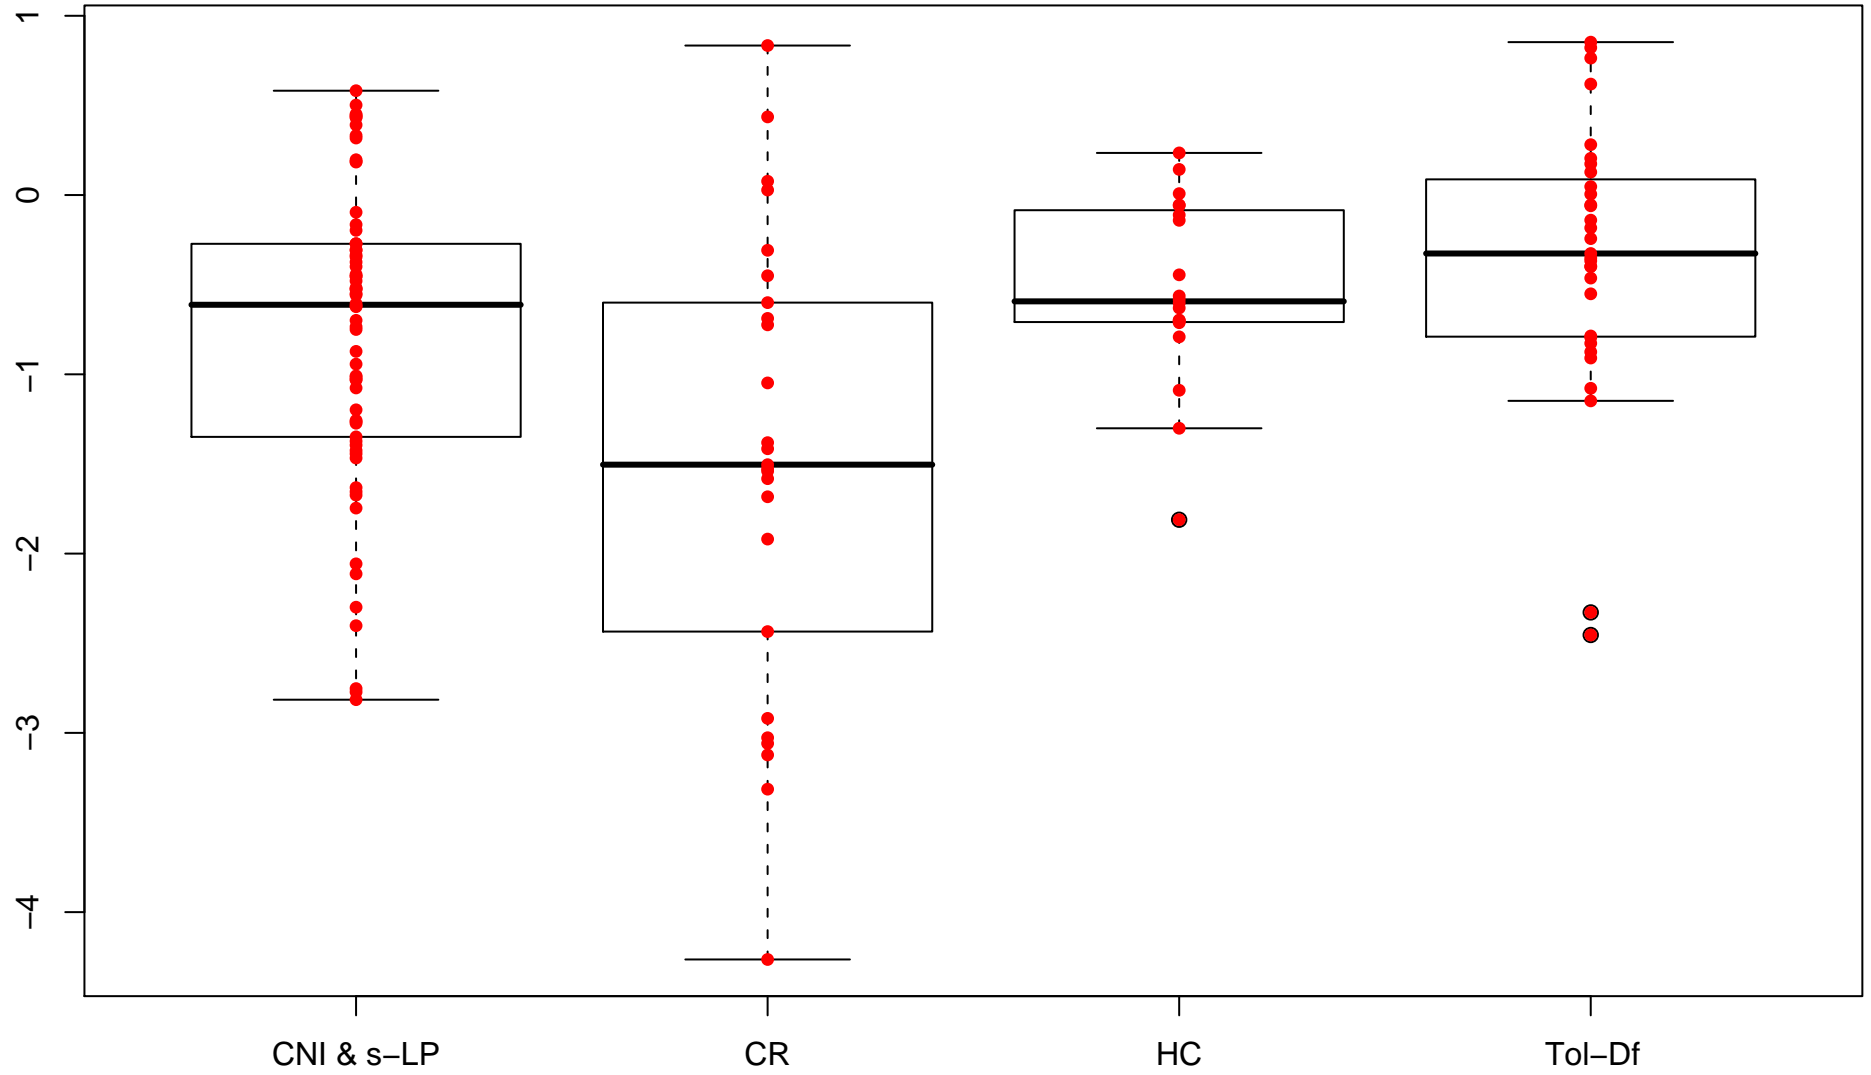



Rank 712 : PFAS  
0.0008946

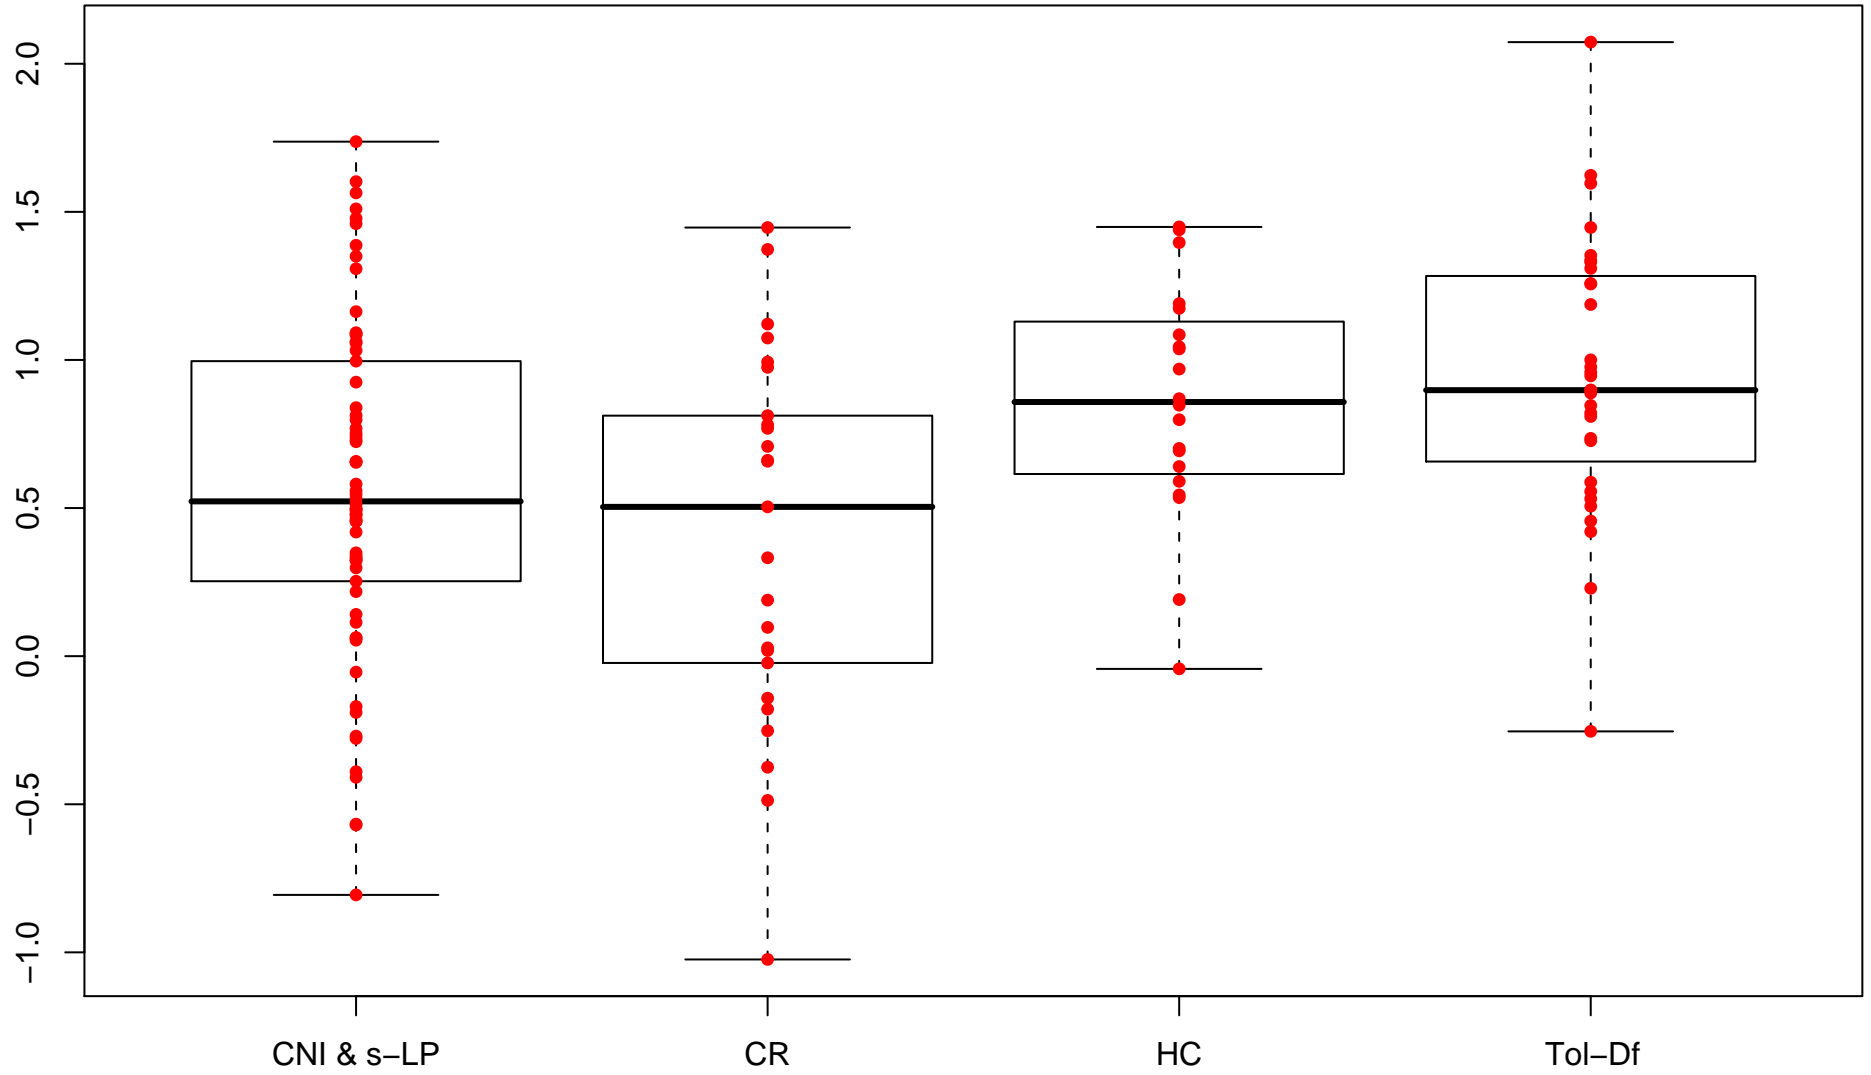



Rank 714 : THC2380706  
0.0009037

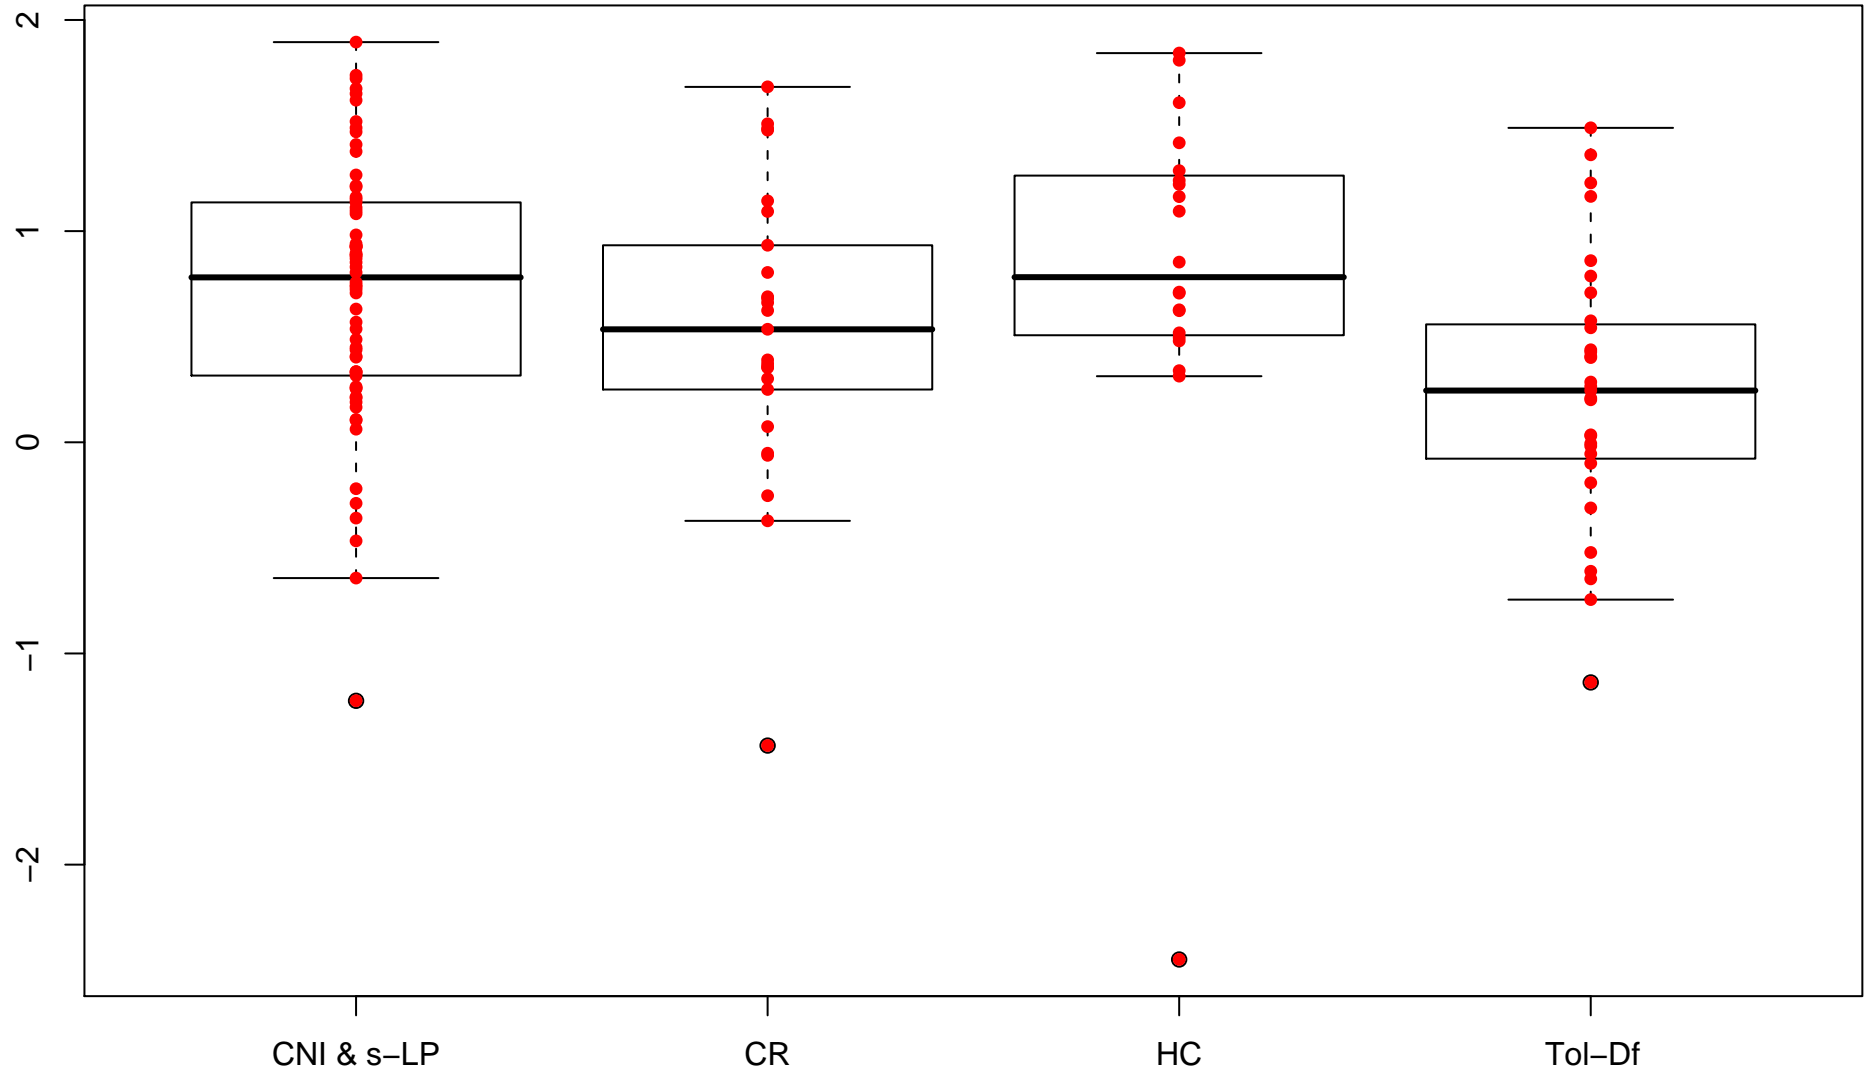

Rank 715 : PLD4  
0.0009047

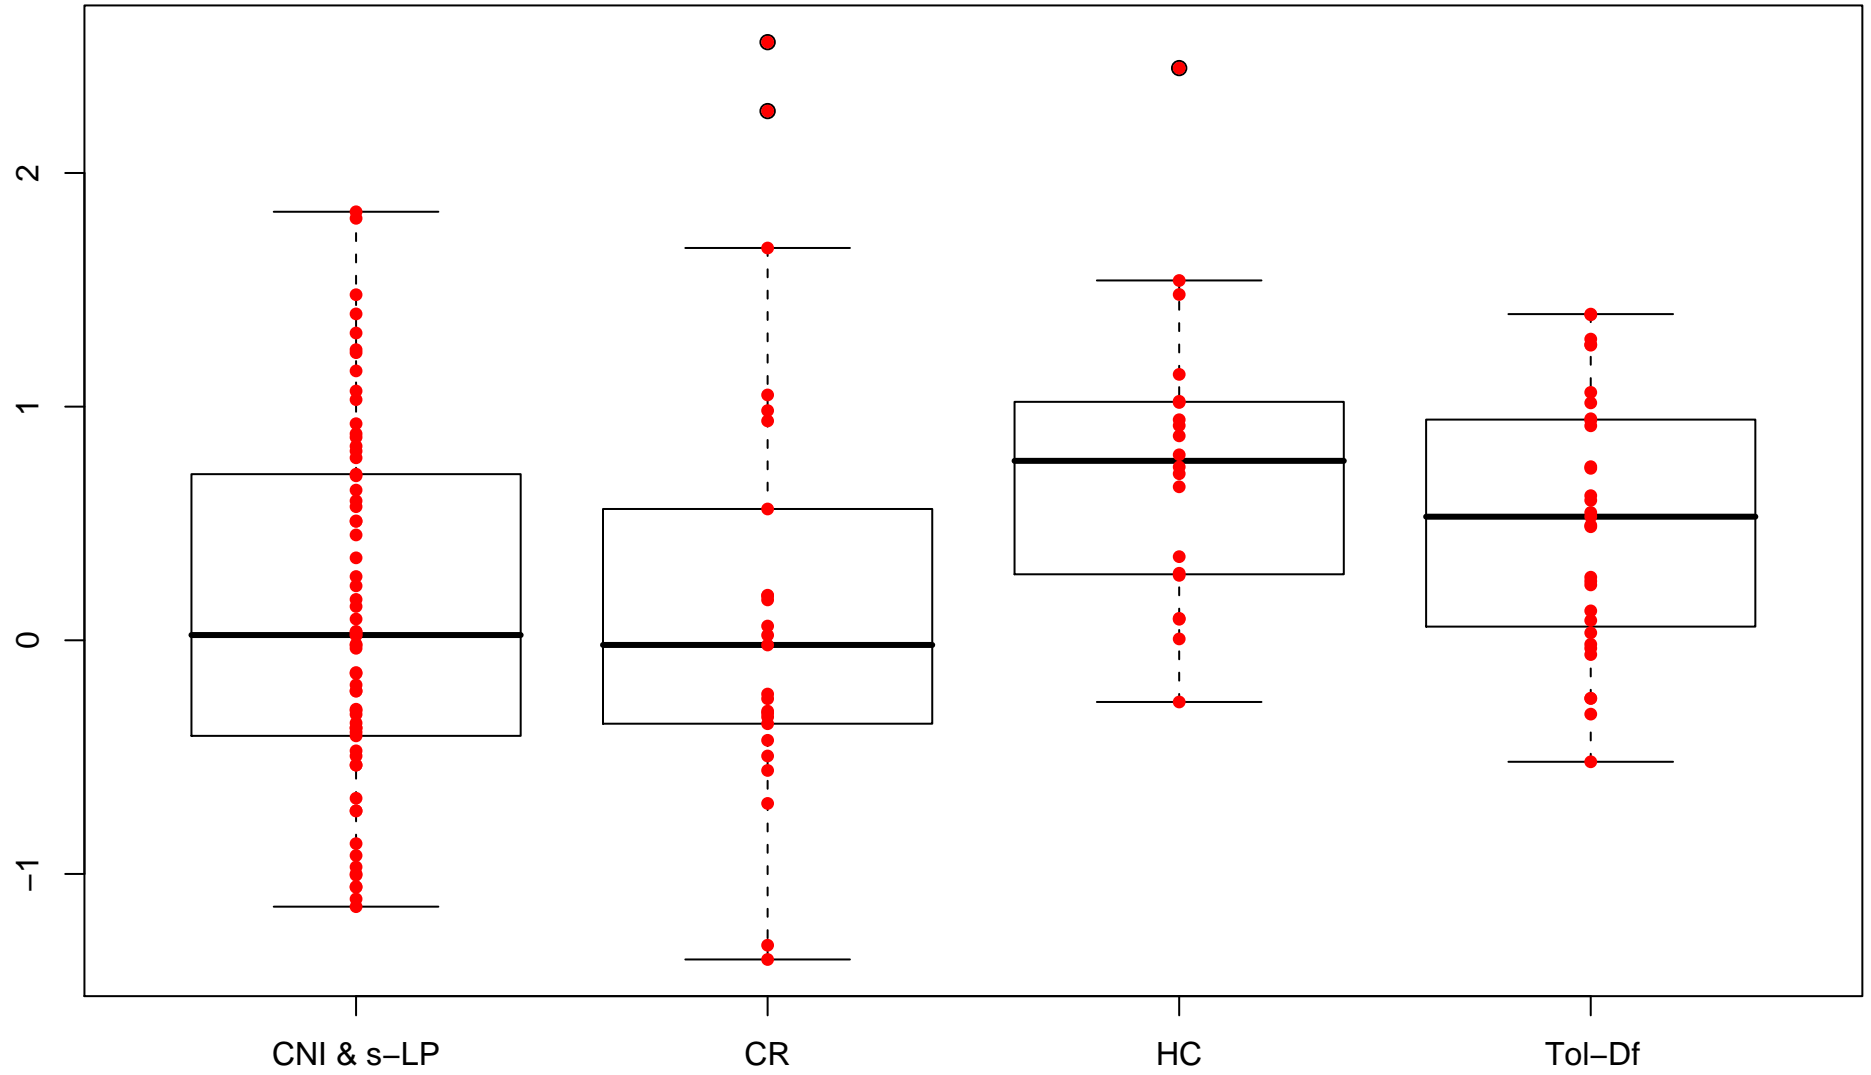

Rank 716 : MTX2  
0.0009067

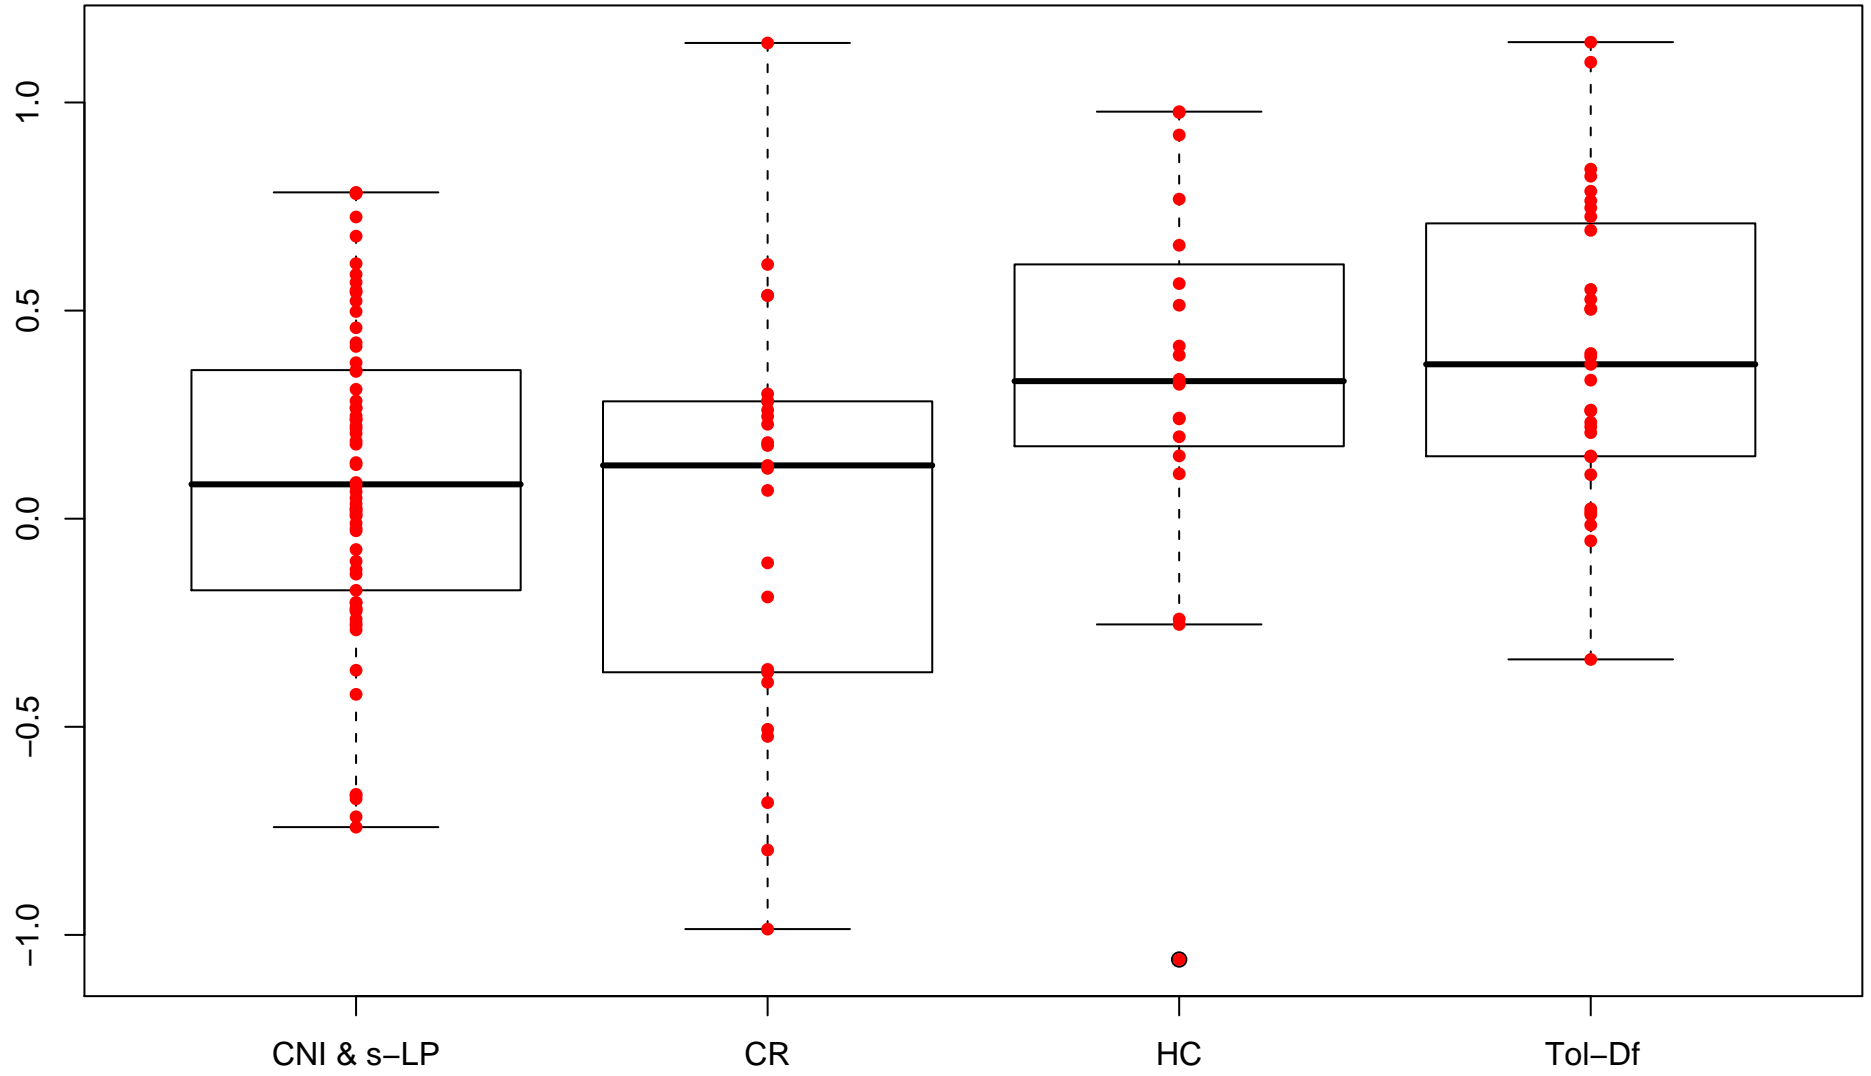

Rank 717 : DDX10  
0.0009088

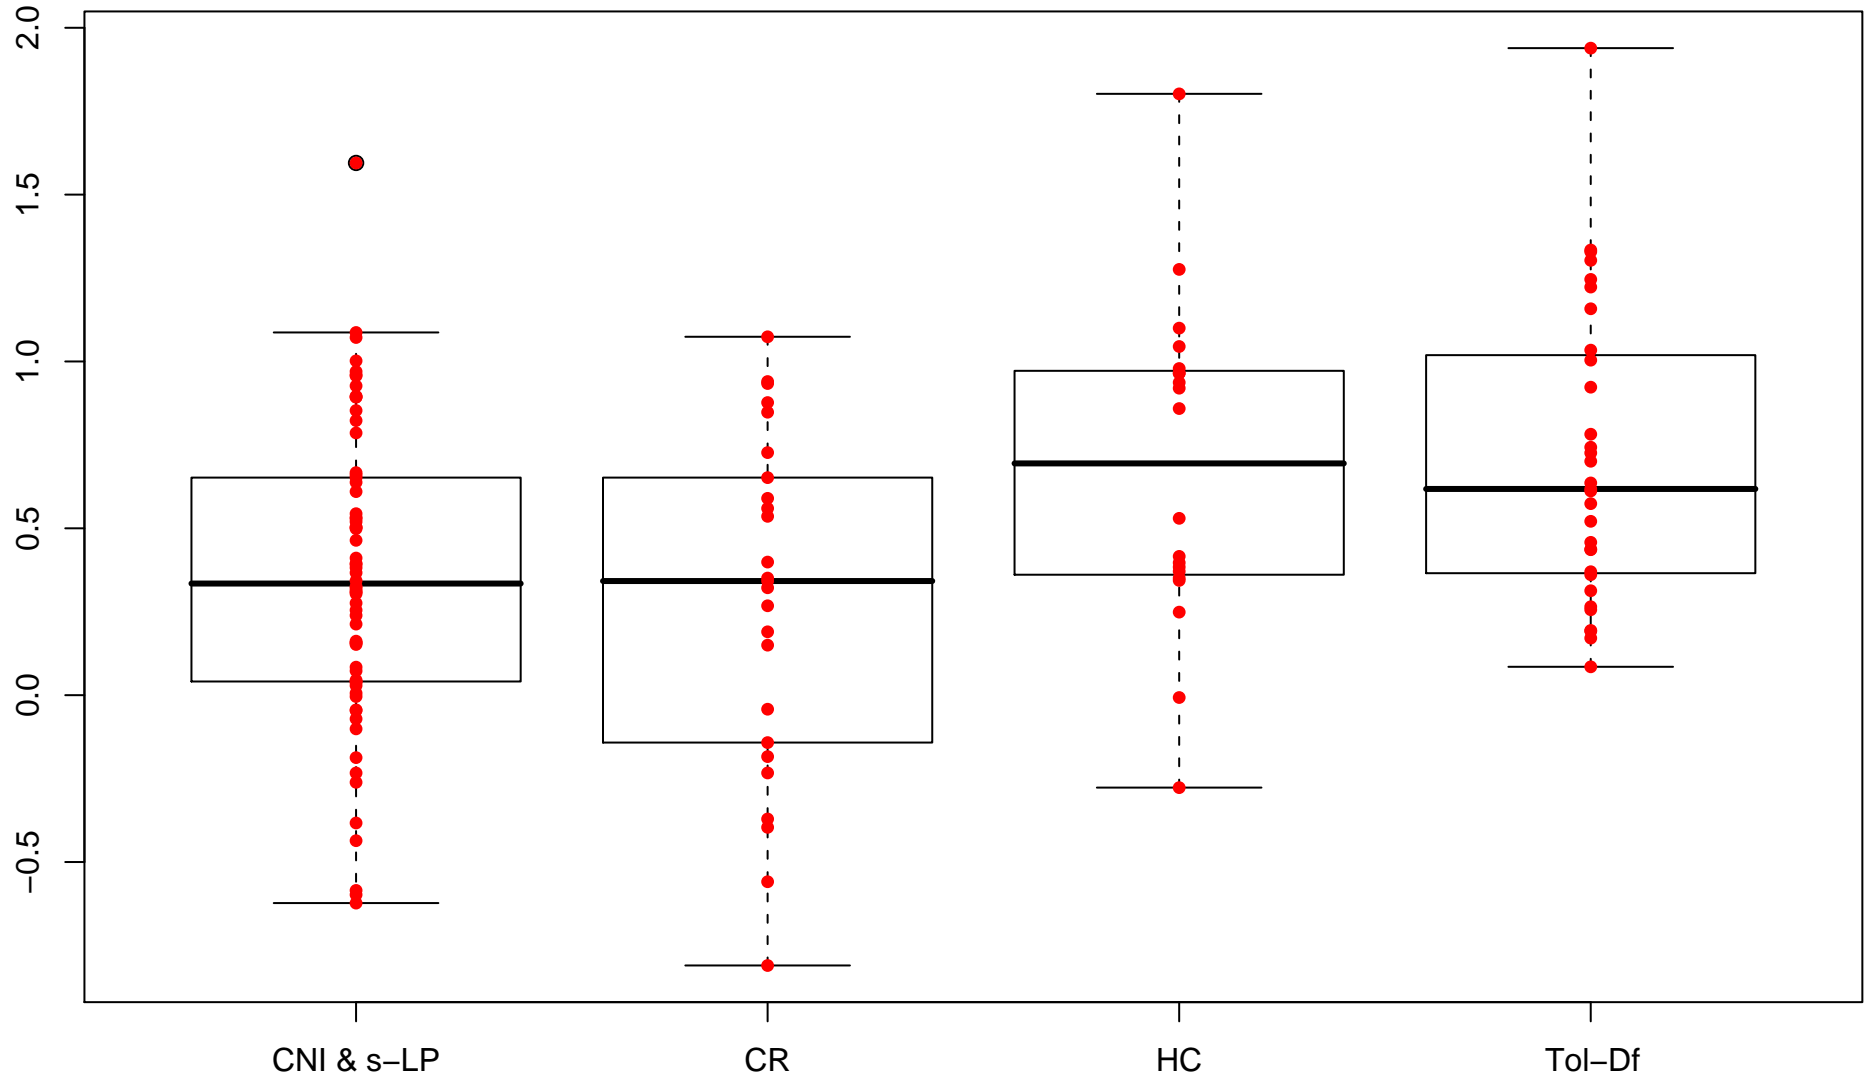

Rank 718 : DKFZP564A0769  
0.0009109

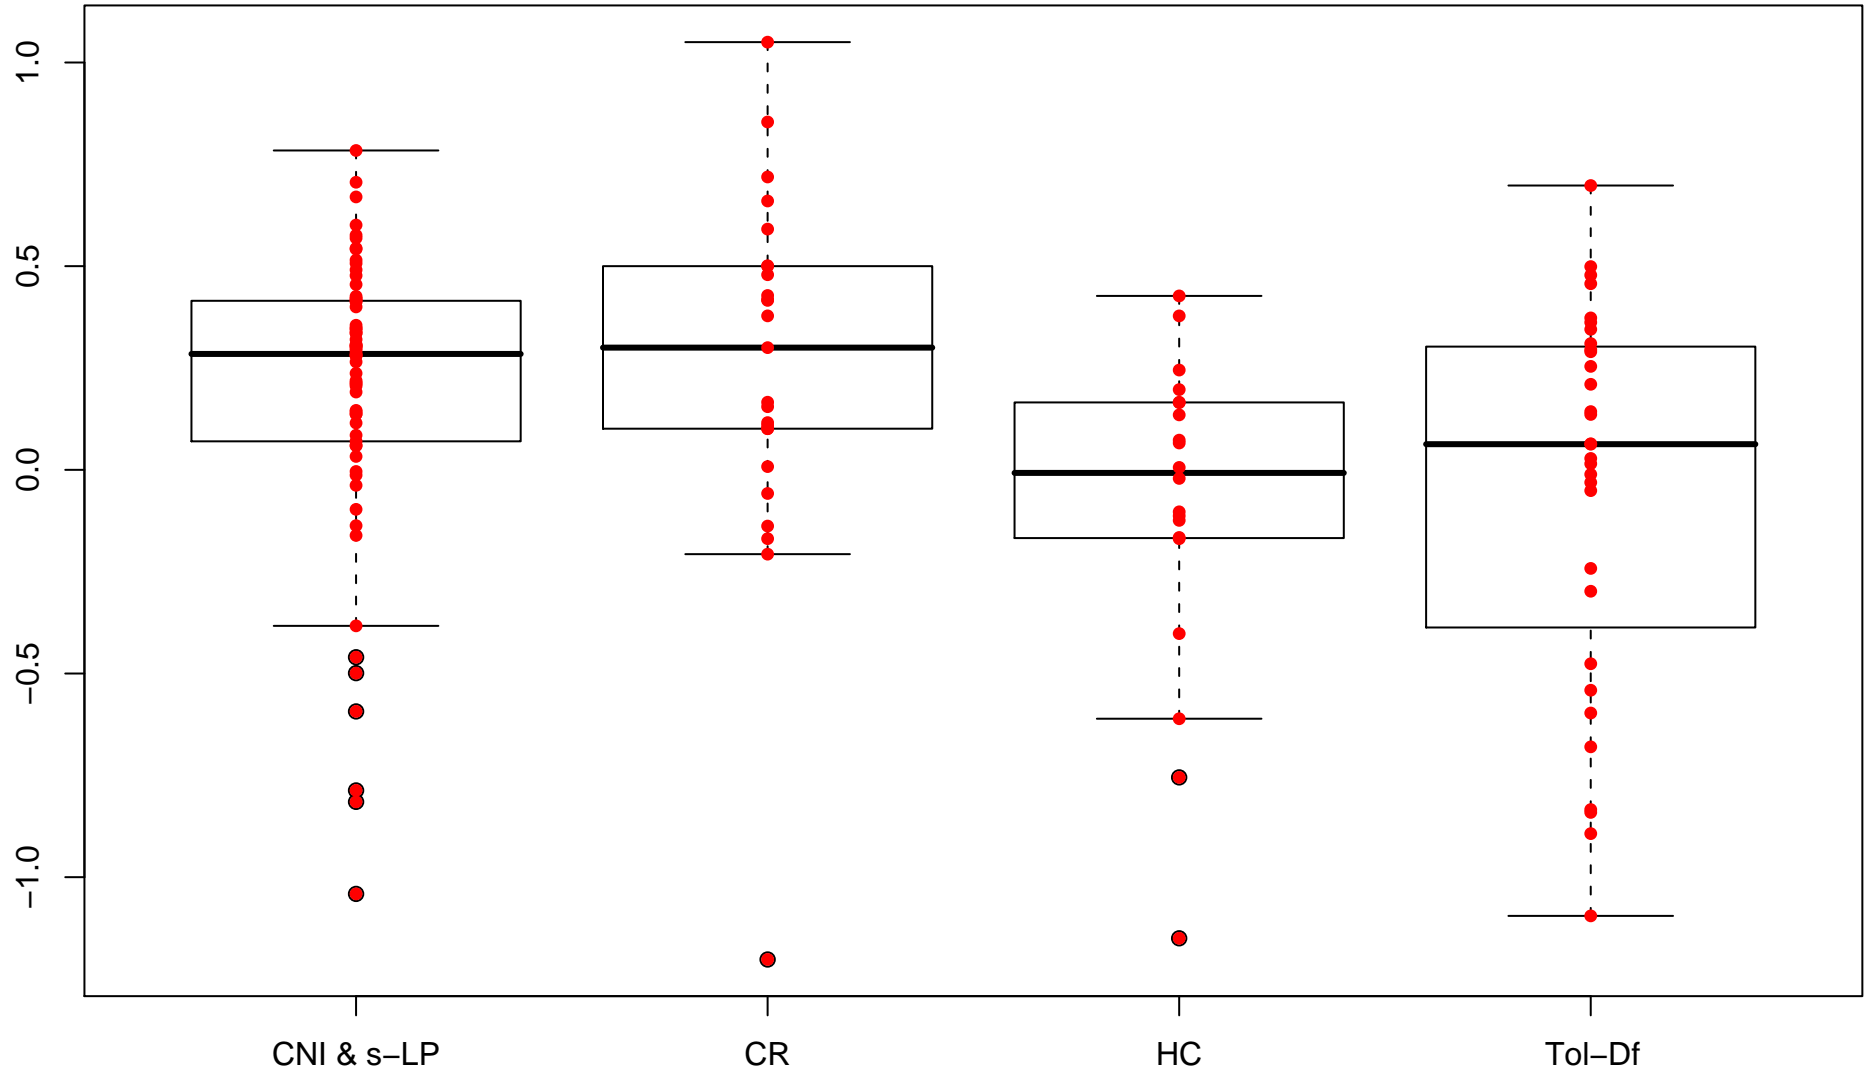

Rank 719 : HBXIP  
0.0009123

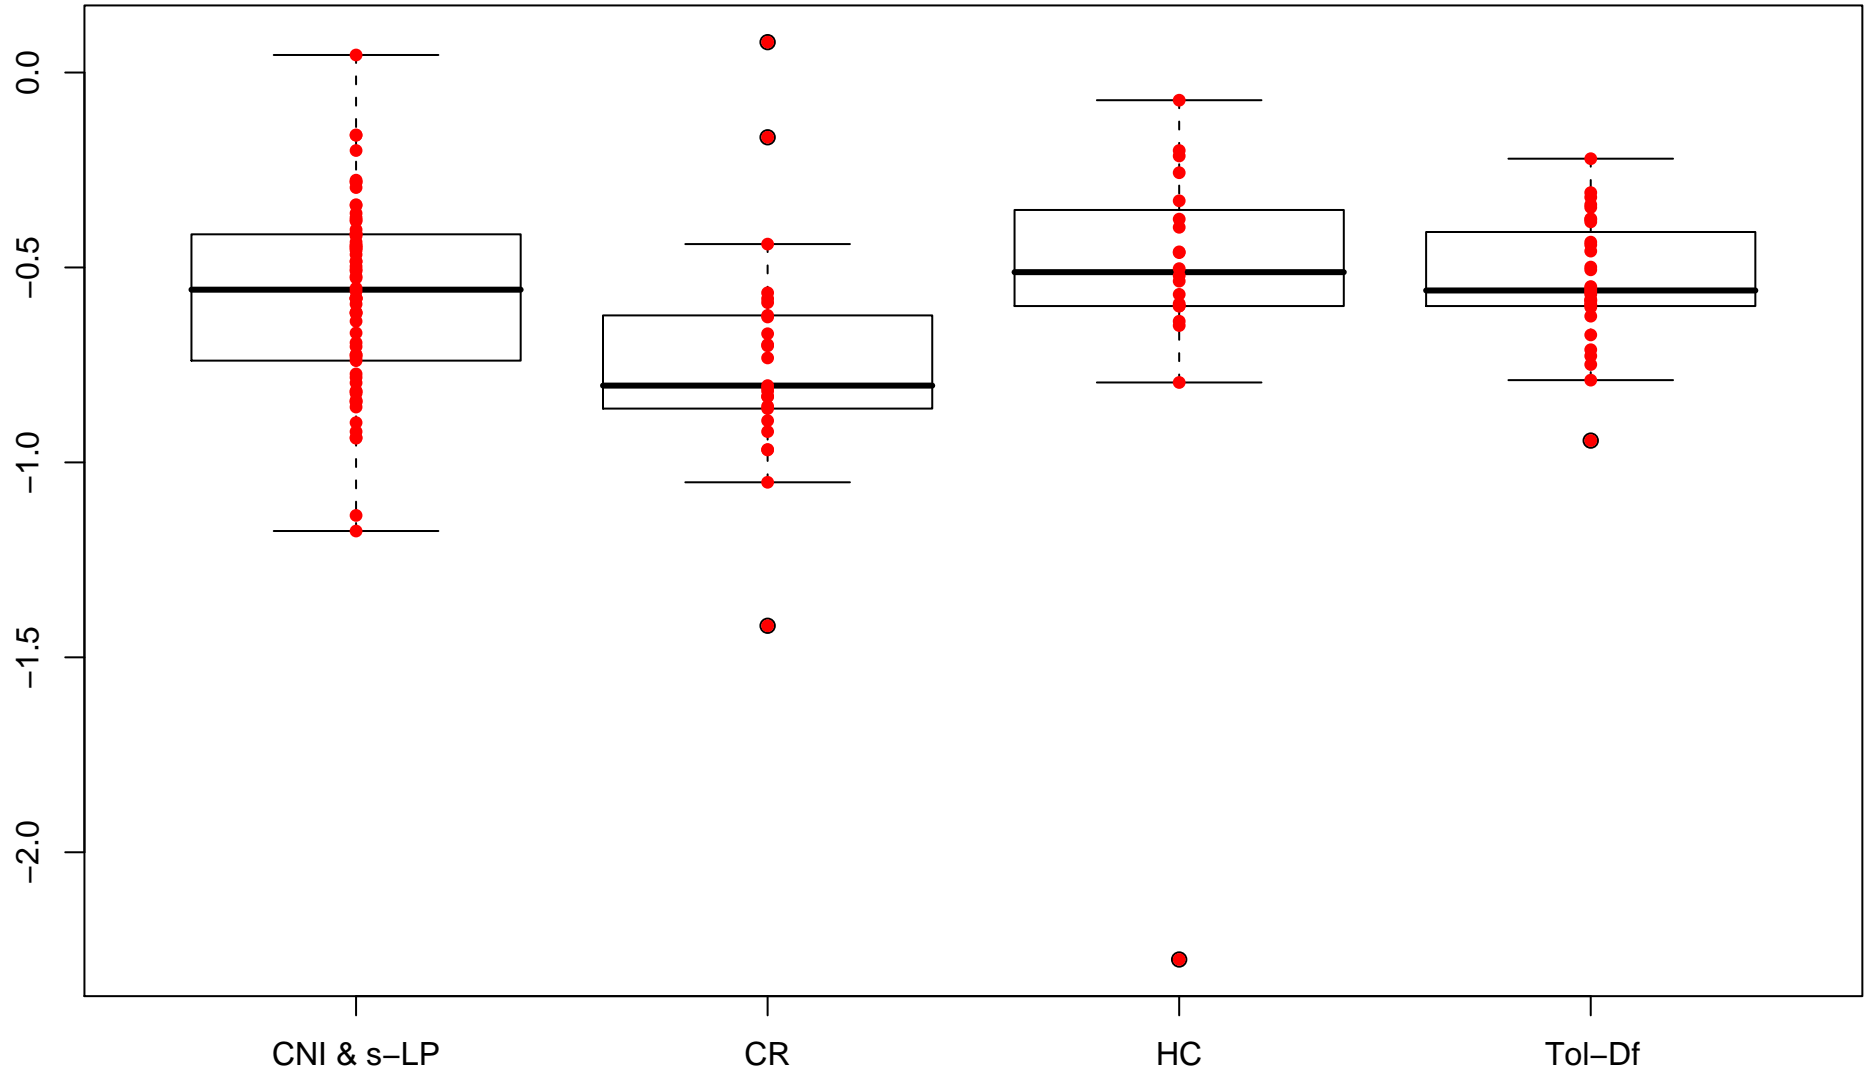



Rank 720 : SR140  
0.0009194

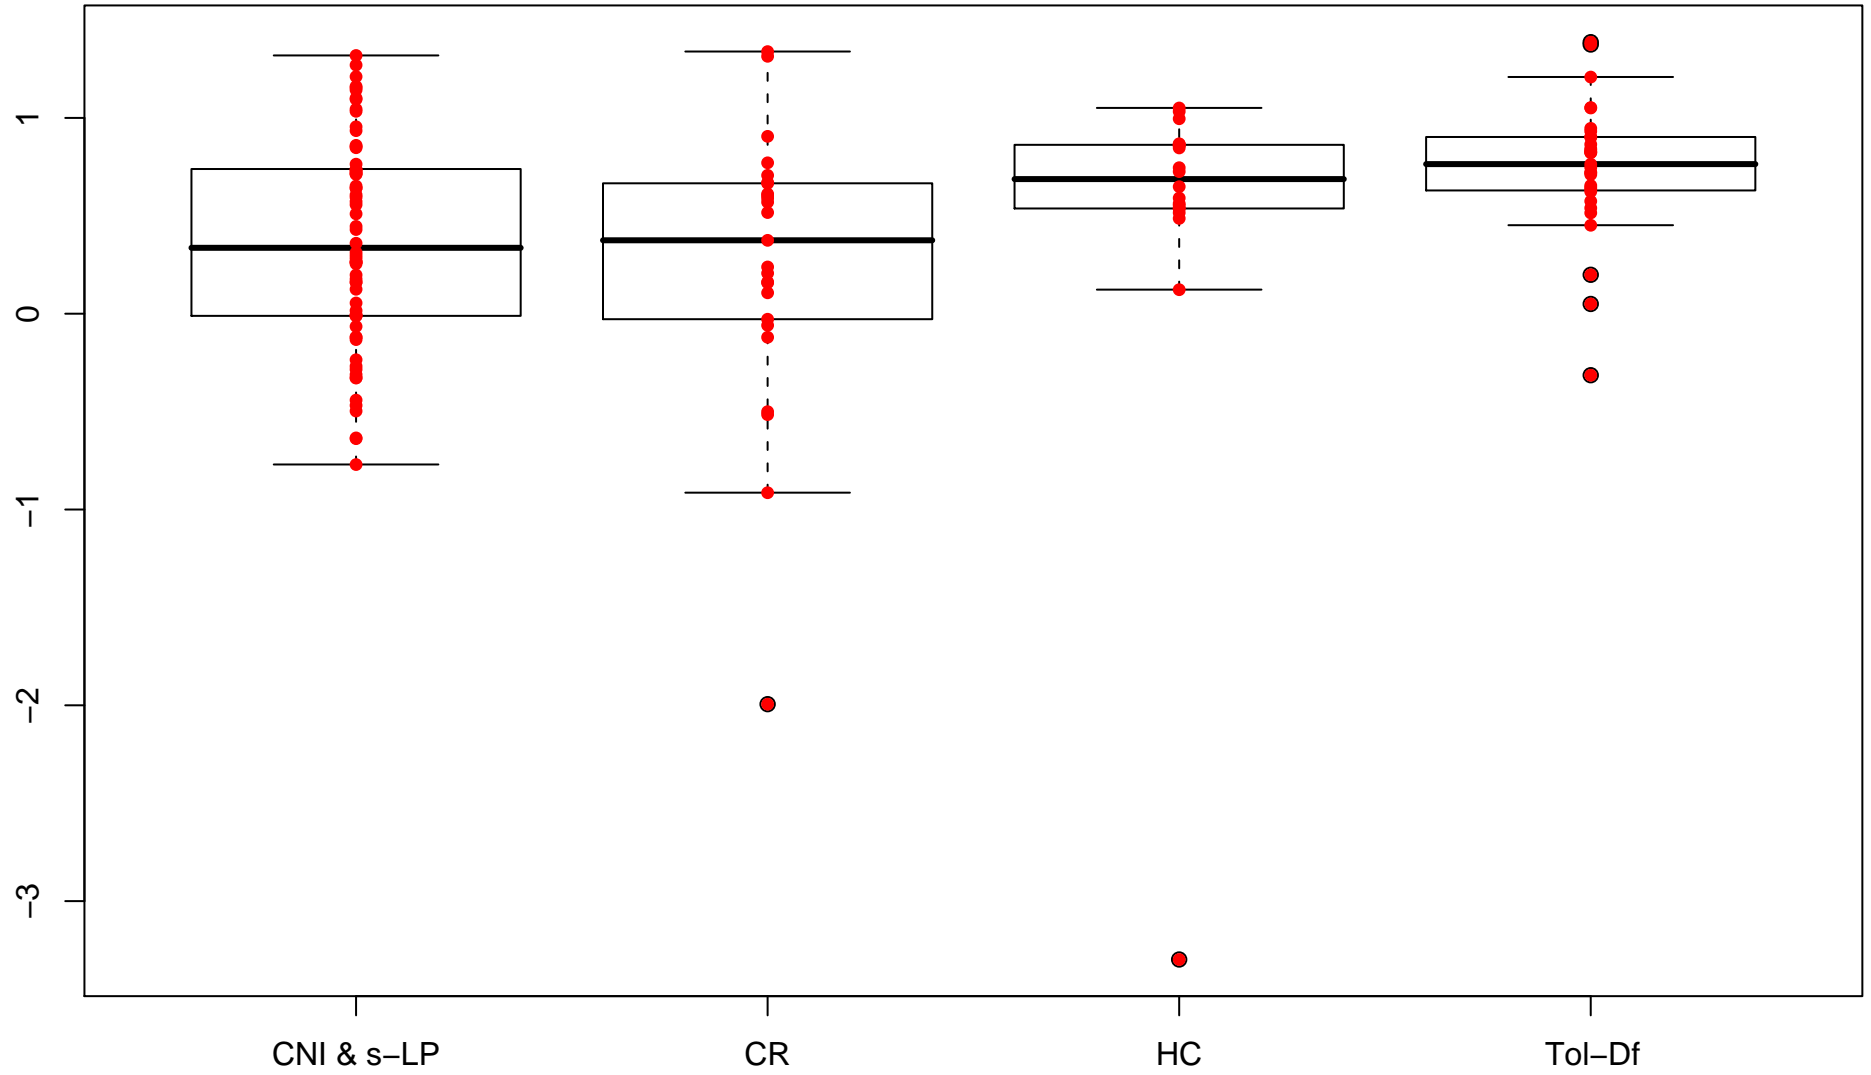

Rank 721 : ORMDL2  
0.0009248

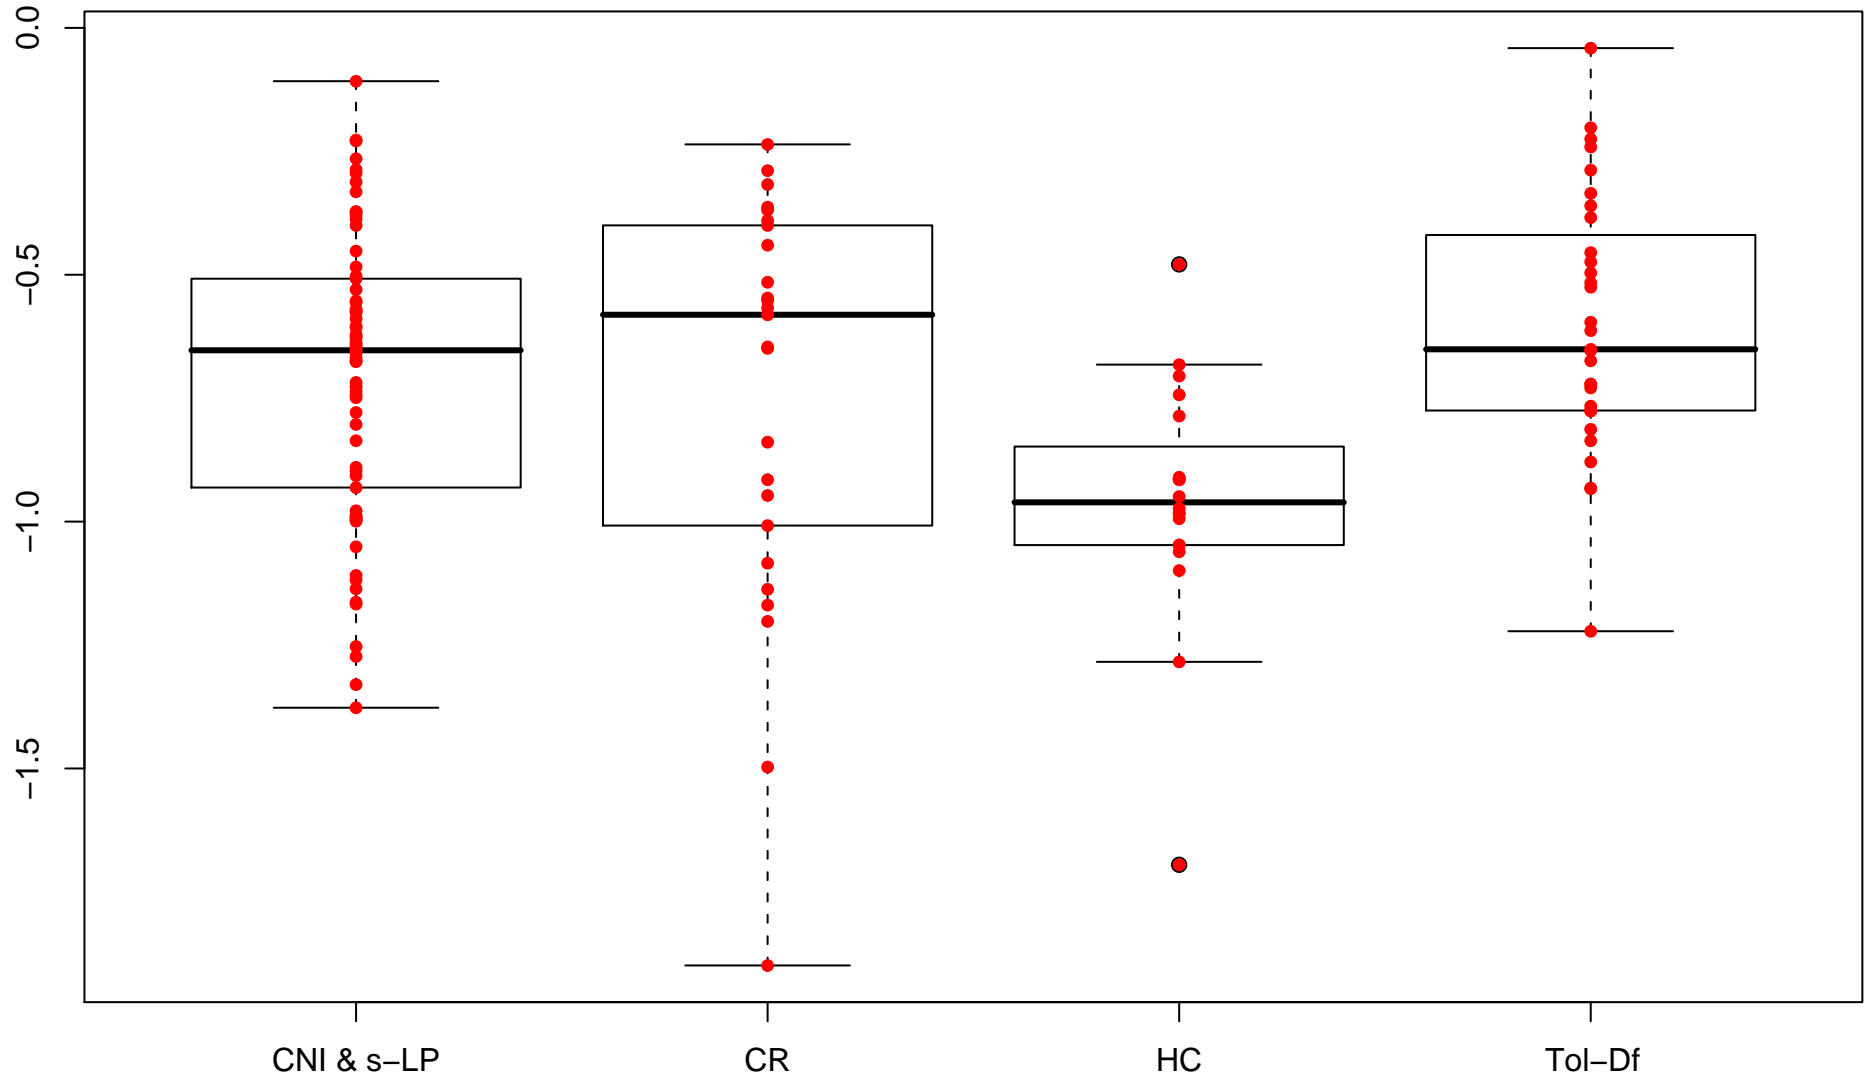

Rank 722 : THC2377375  
0.000929

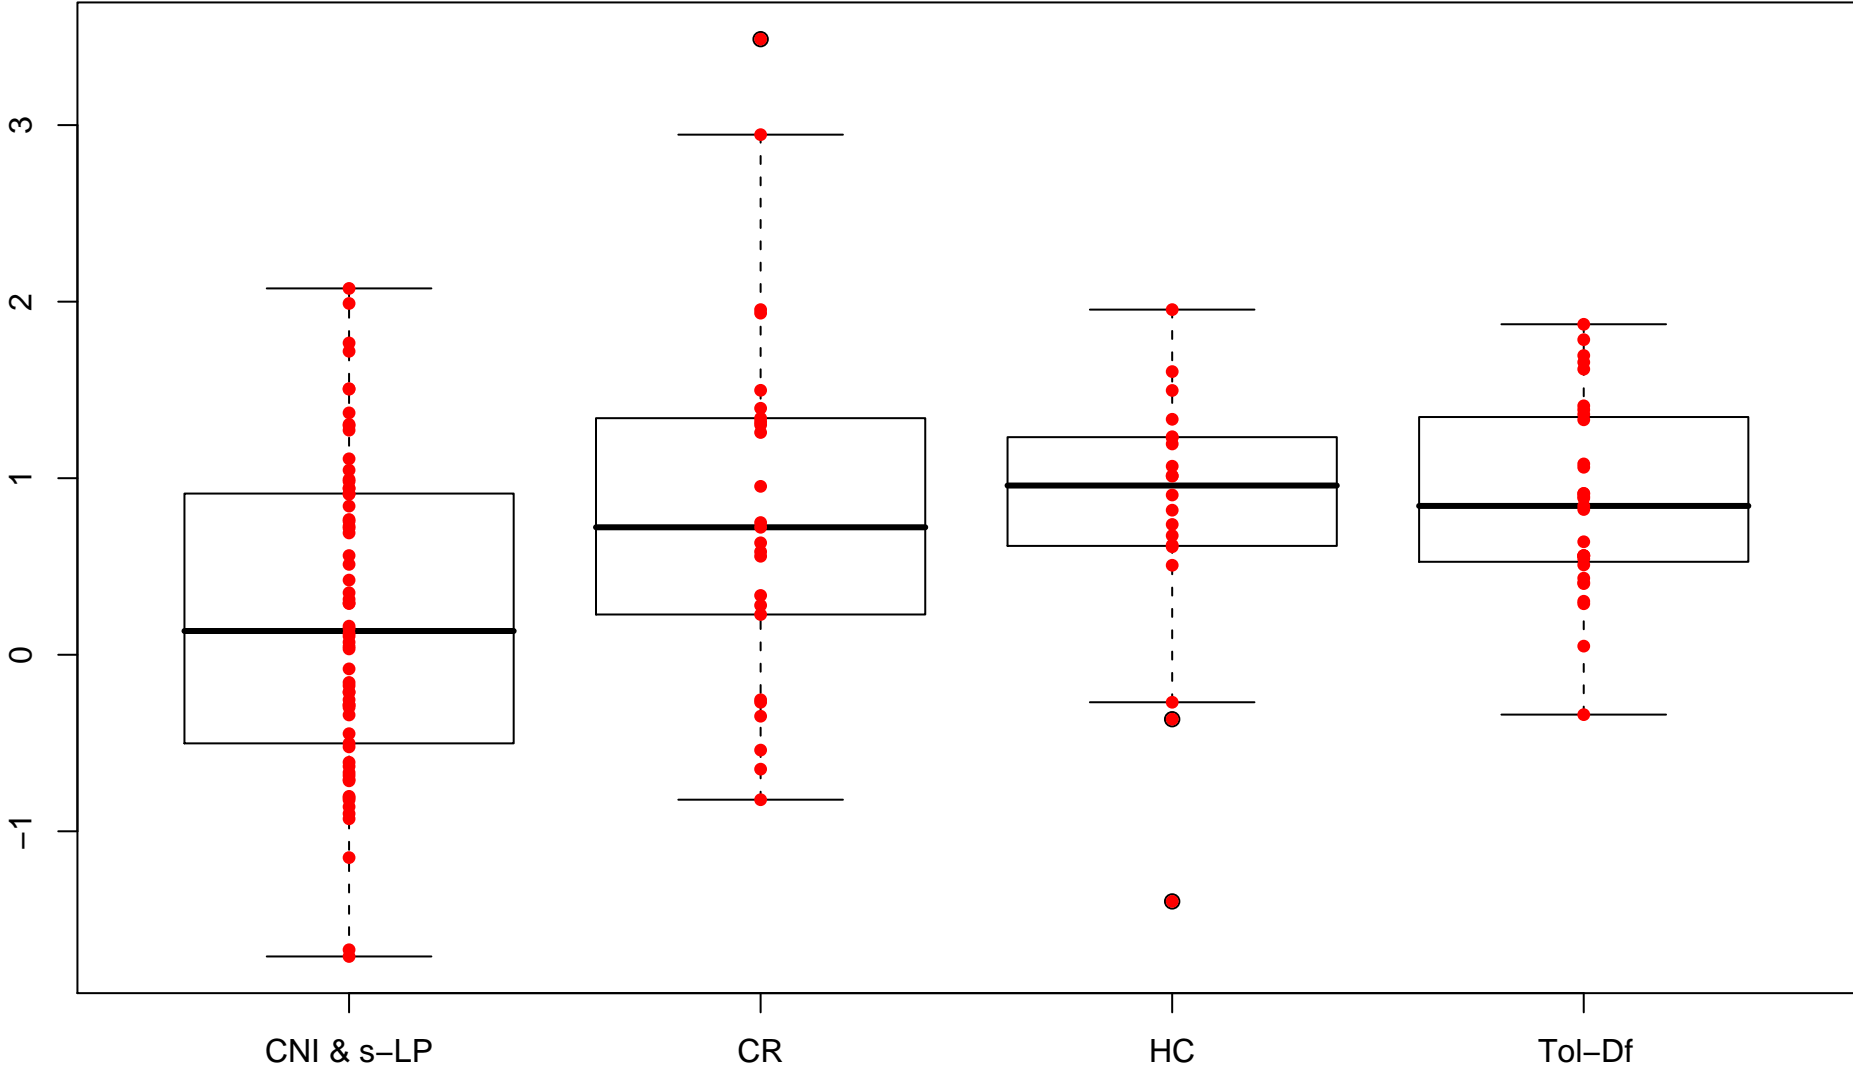

Rank 723 : LAX1  
0.0009373

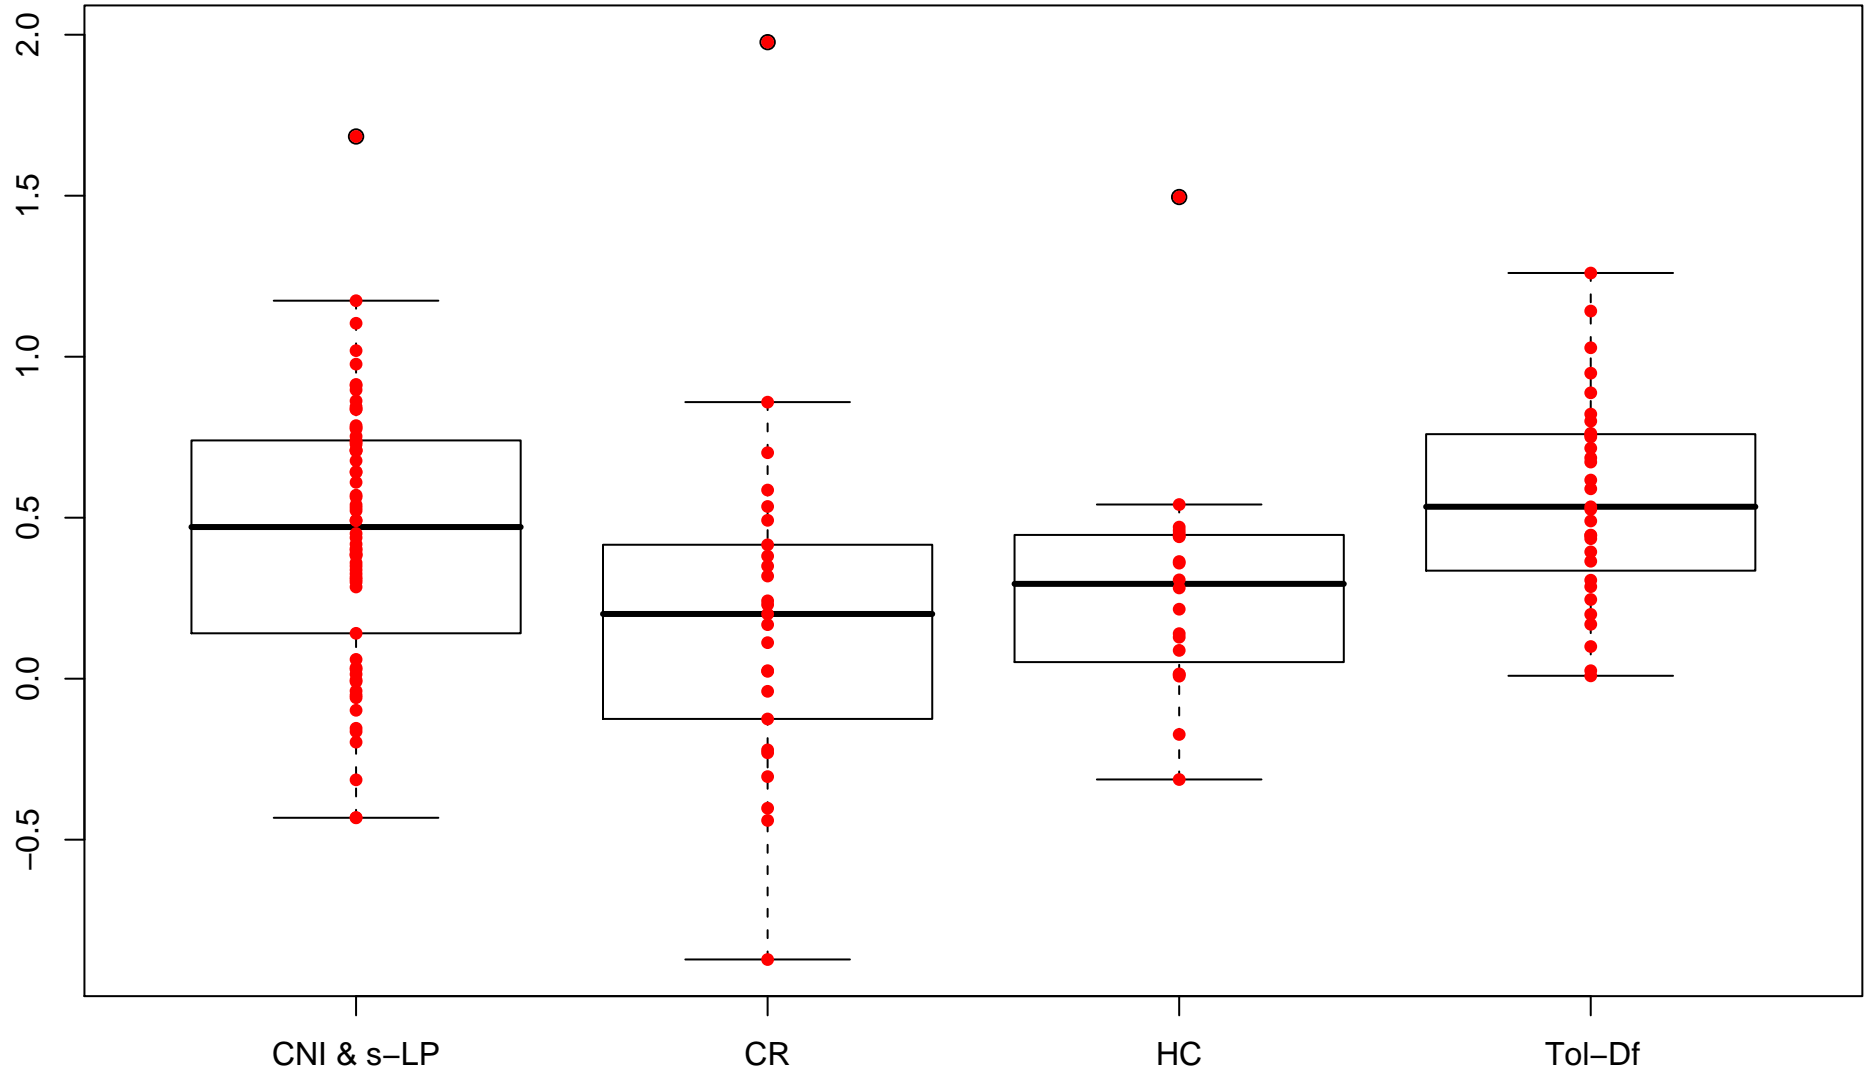

Rank 724 : LRRC25  
0.0009374

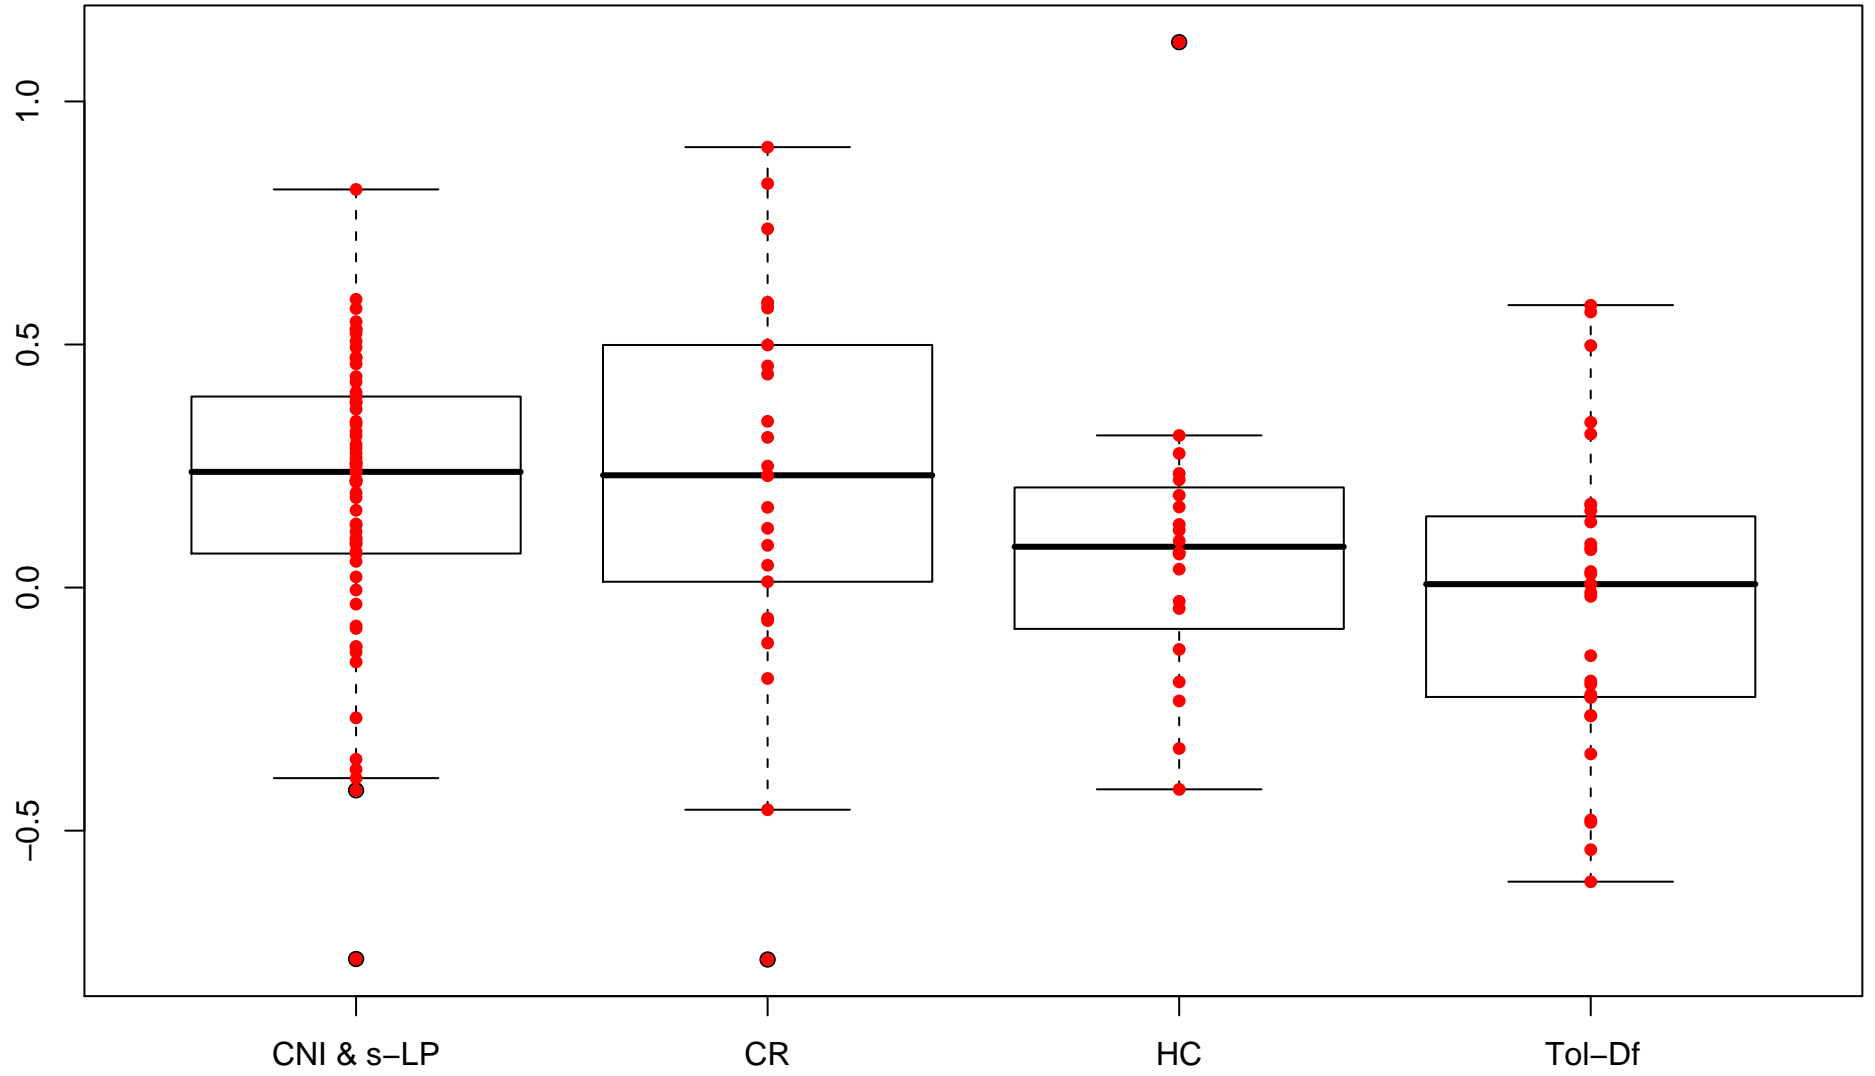

Rank 725 : AP3S2  
0.0009398

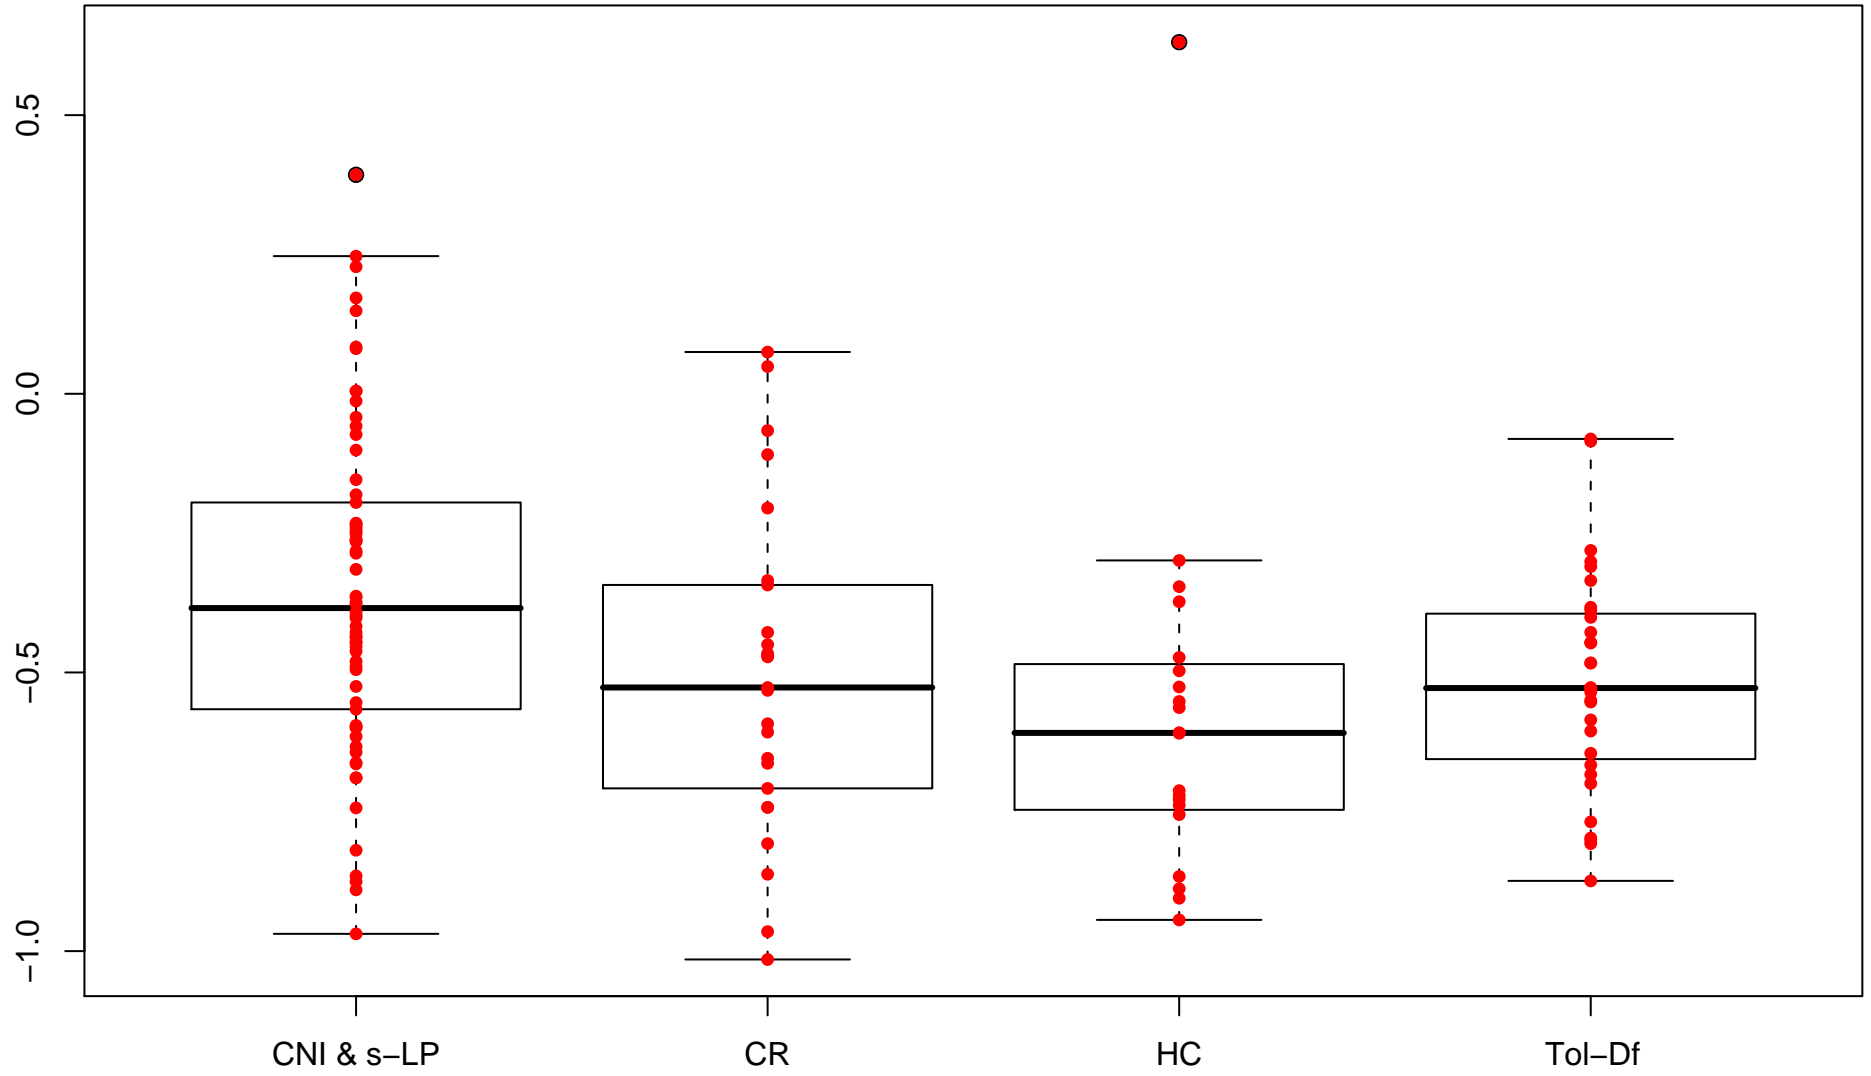

Rank 726 : SYK  
0.0009472

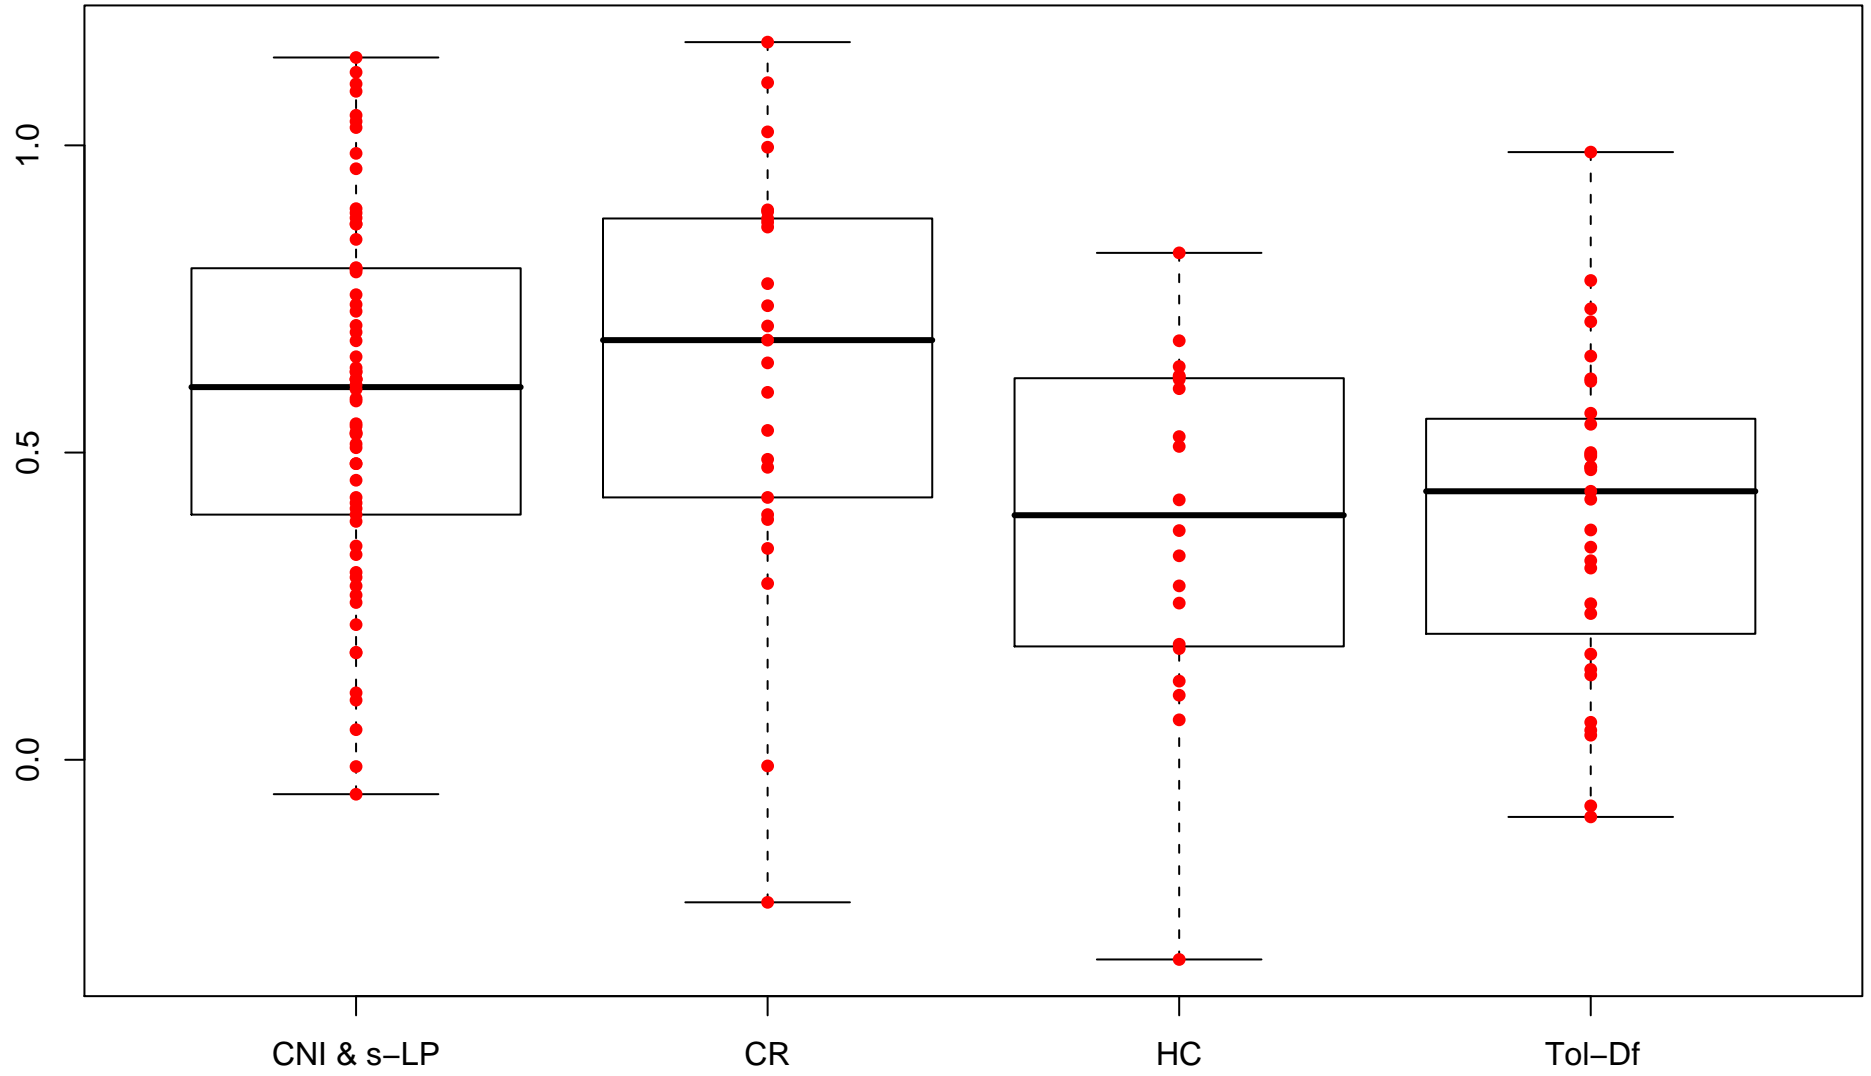

Rank 727 : POLRMT  
0.0009482

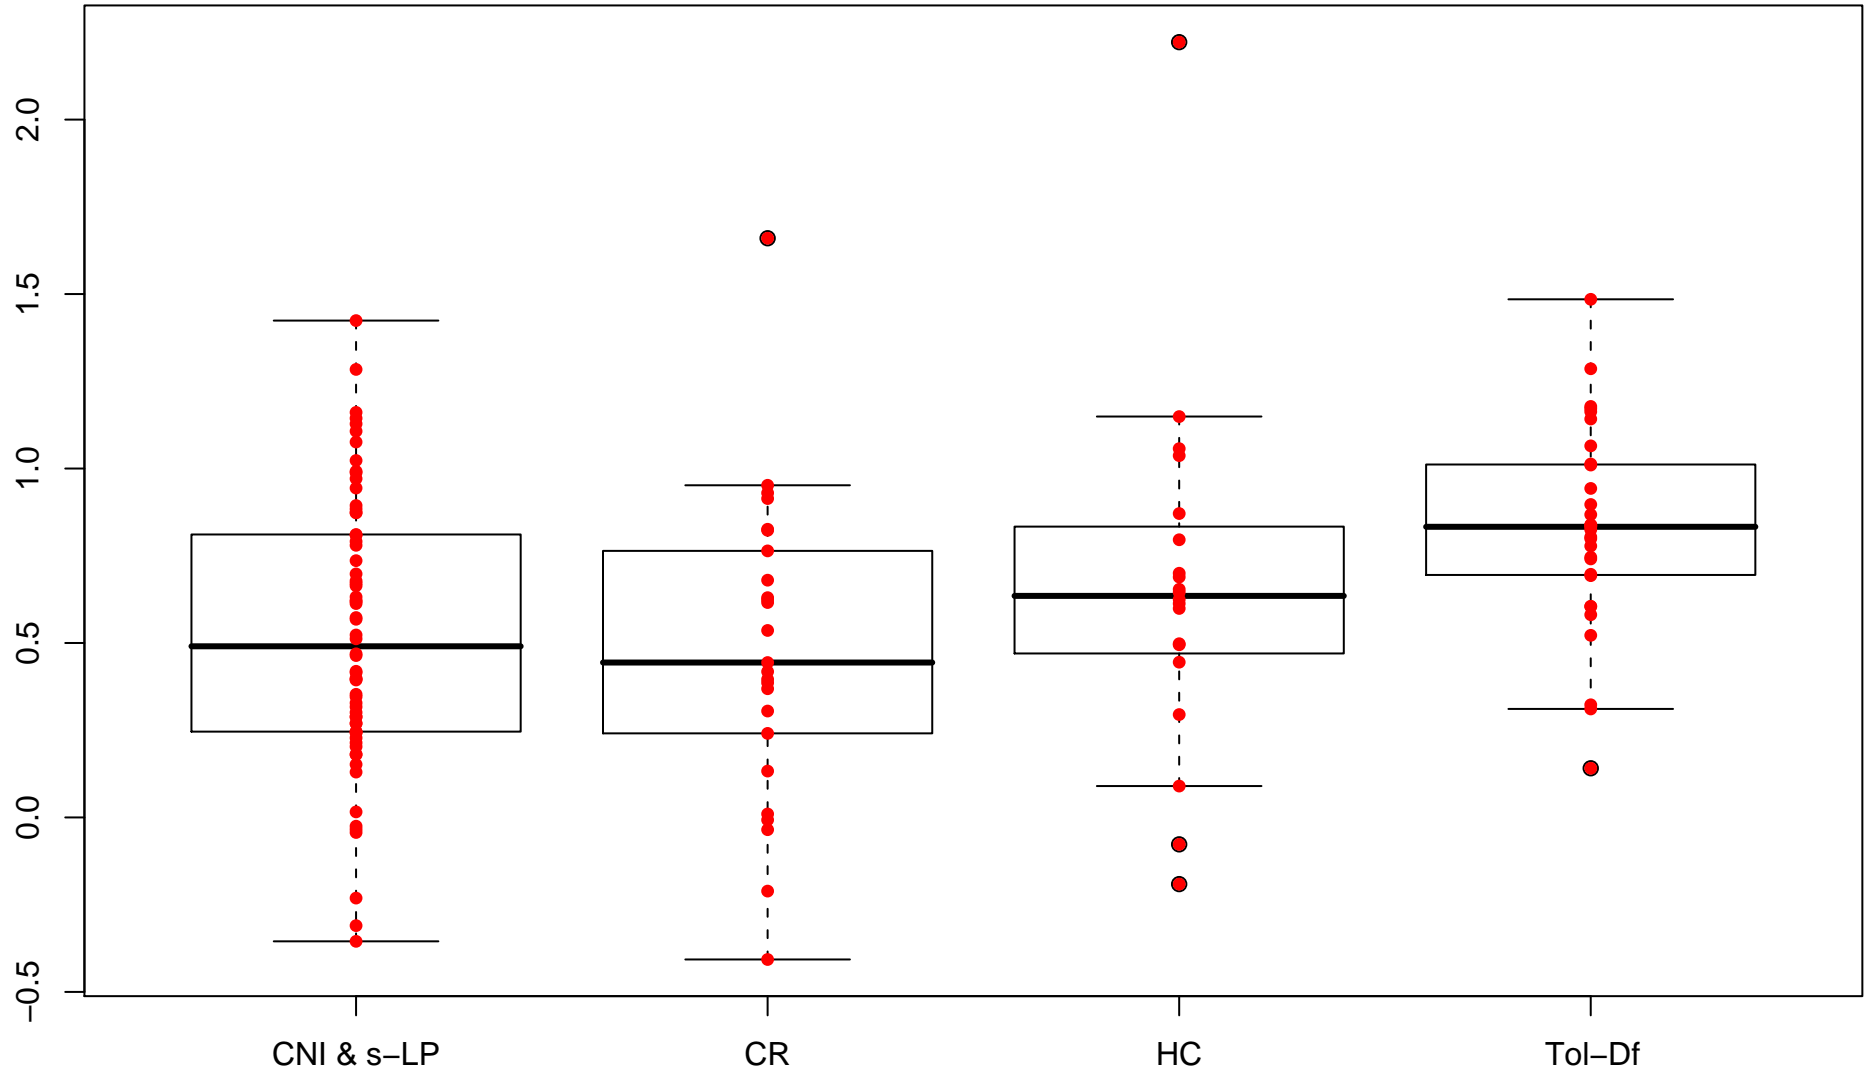



Rank 728 : OMD  
0.0009509

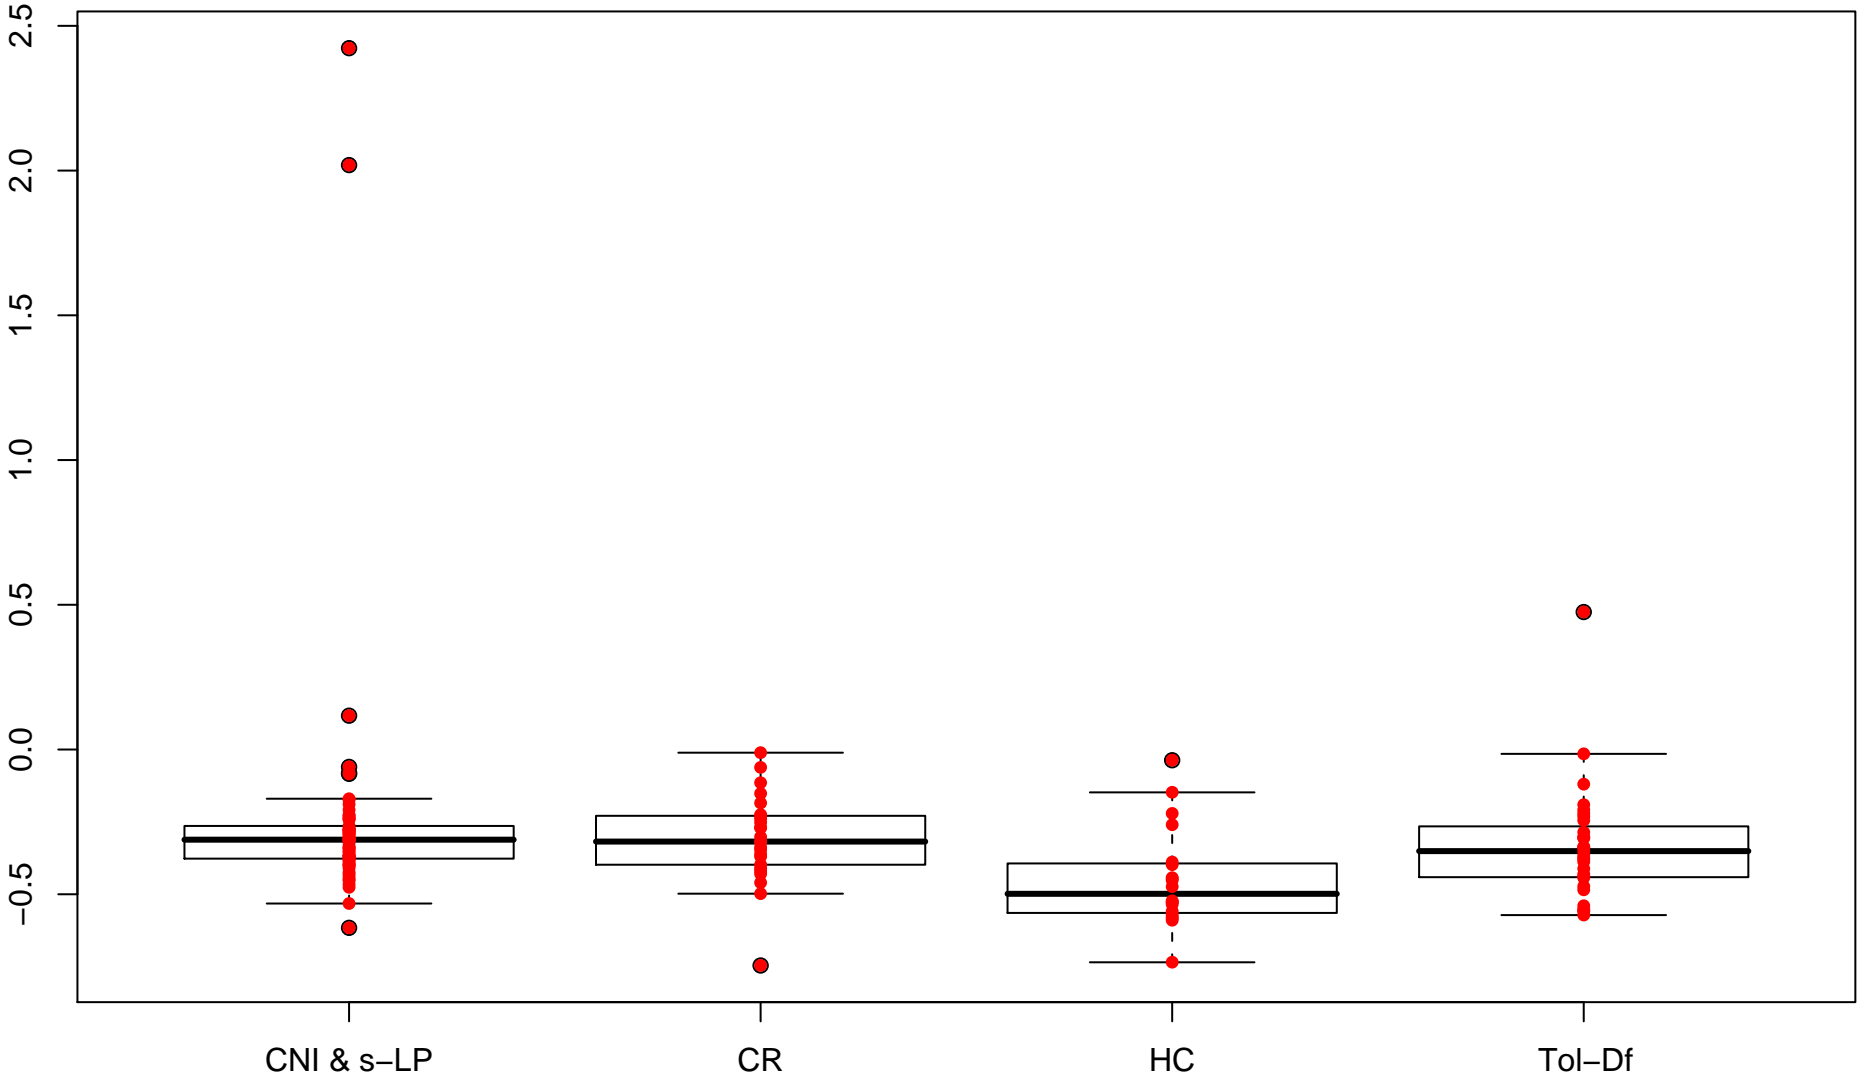

Rank 729 : KIR3DX1  
0.0009545

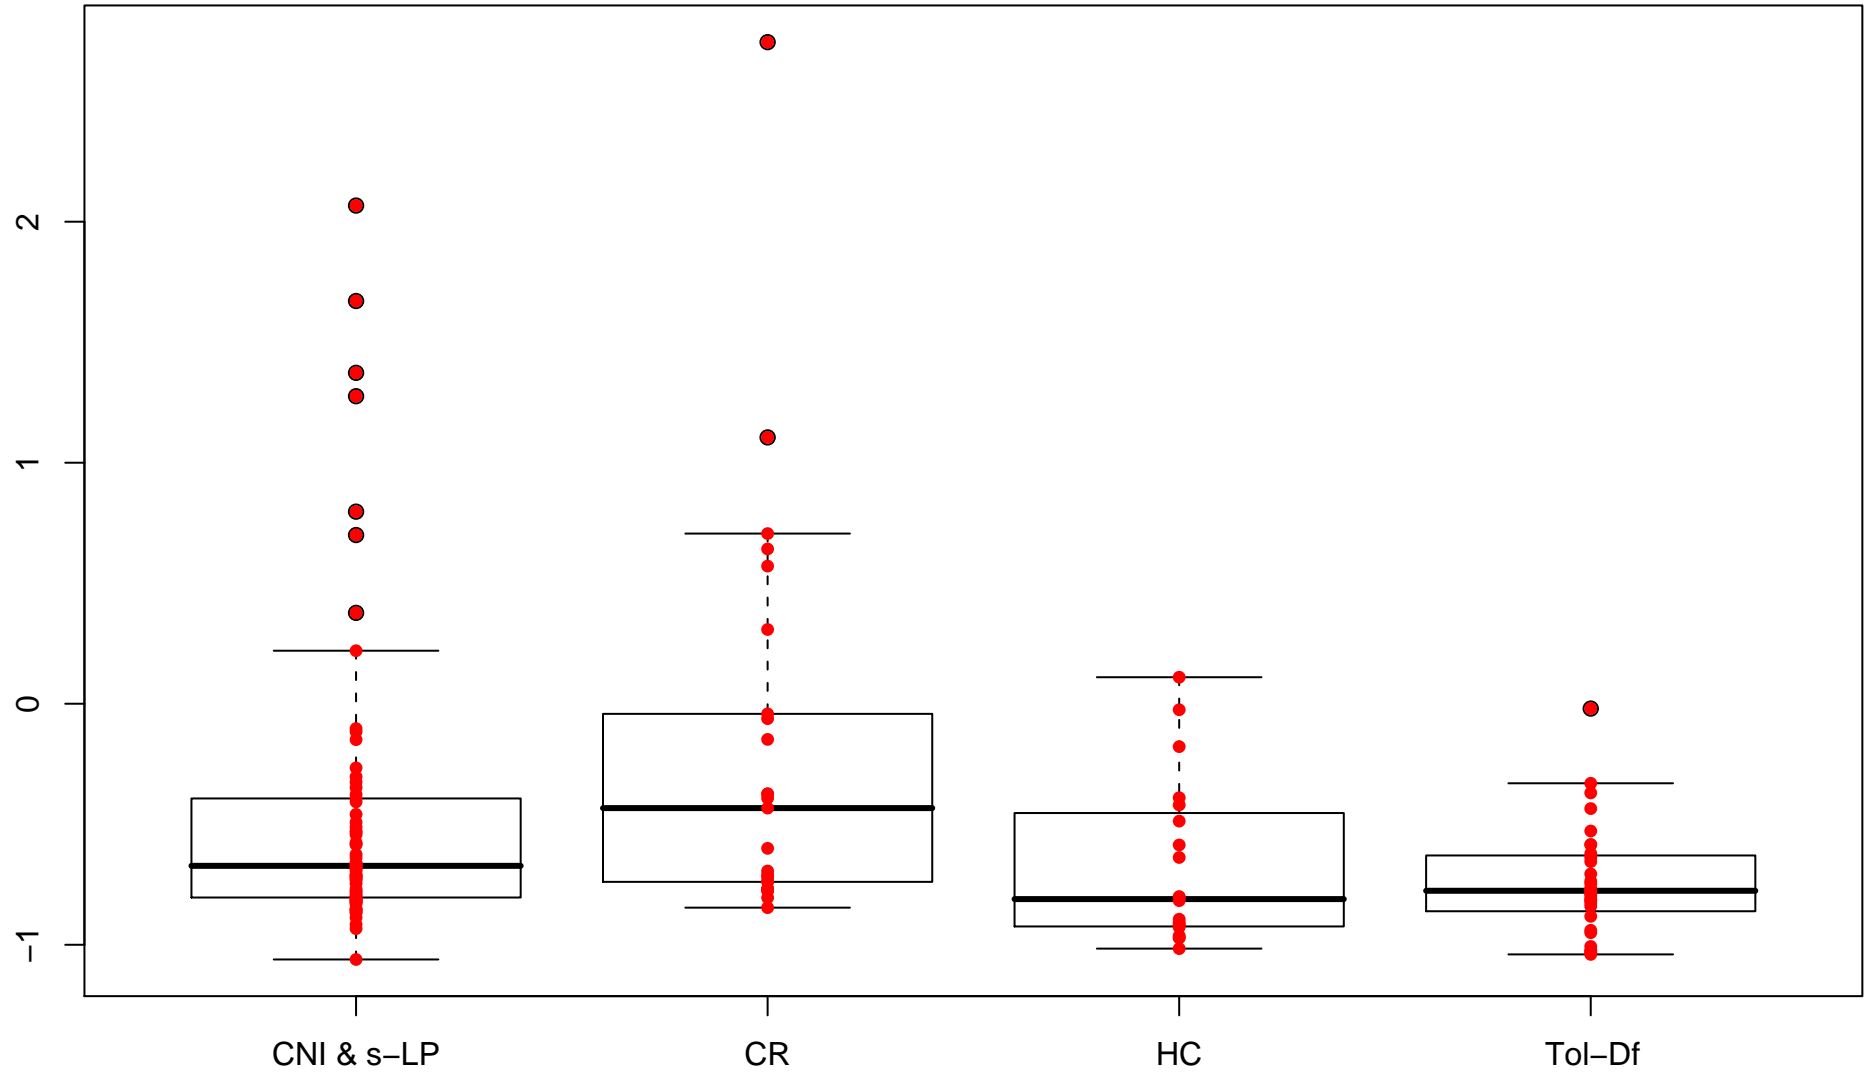

Rank 730 : TMED10  
0.0009557

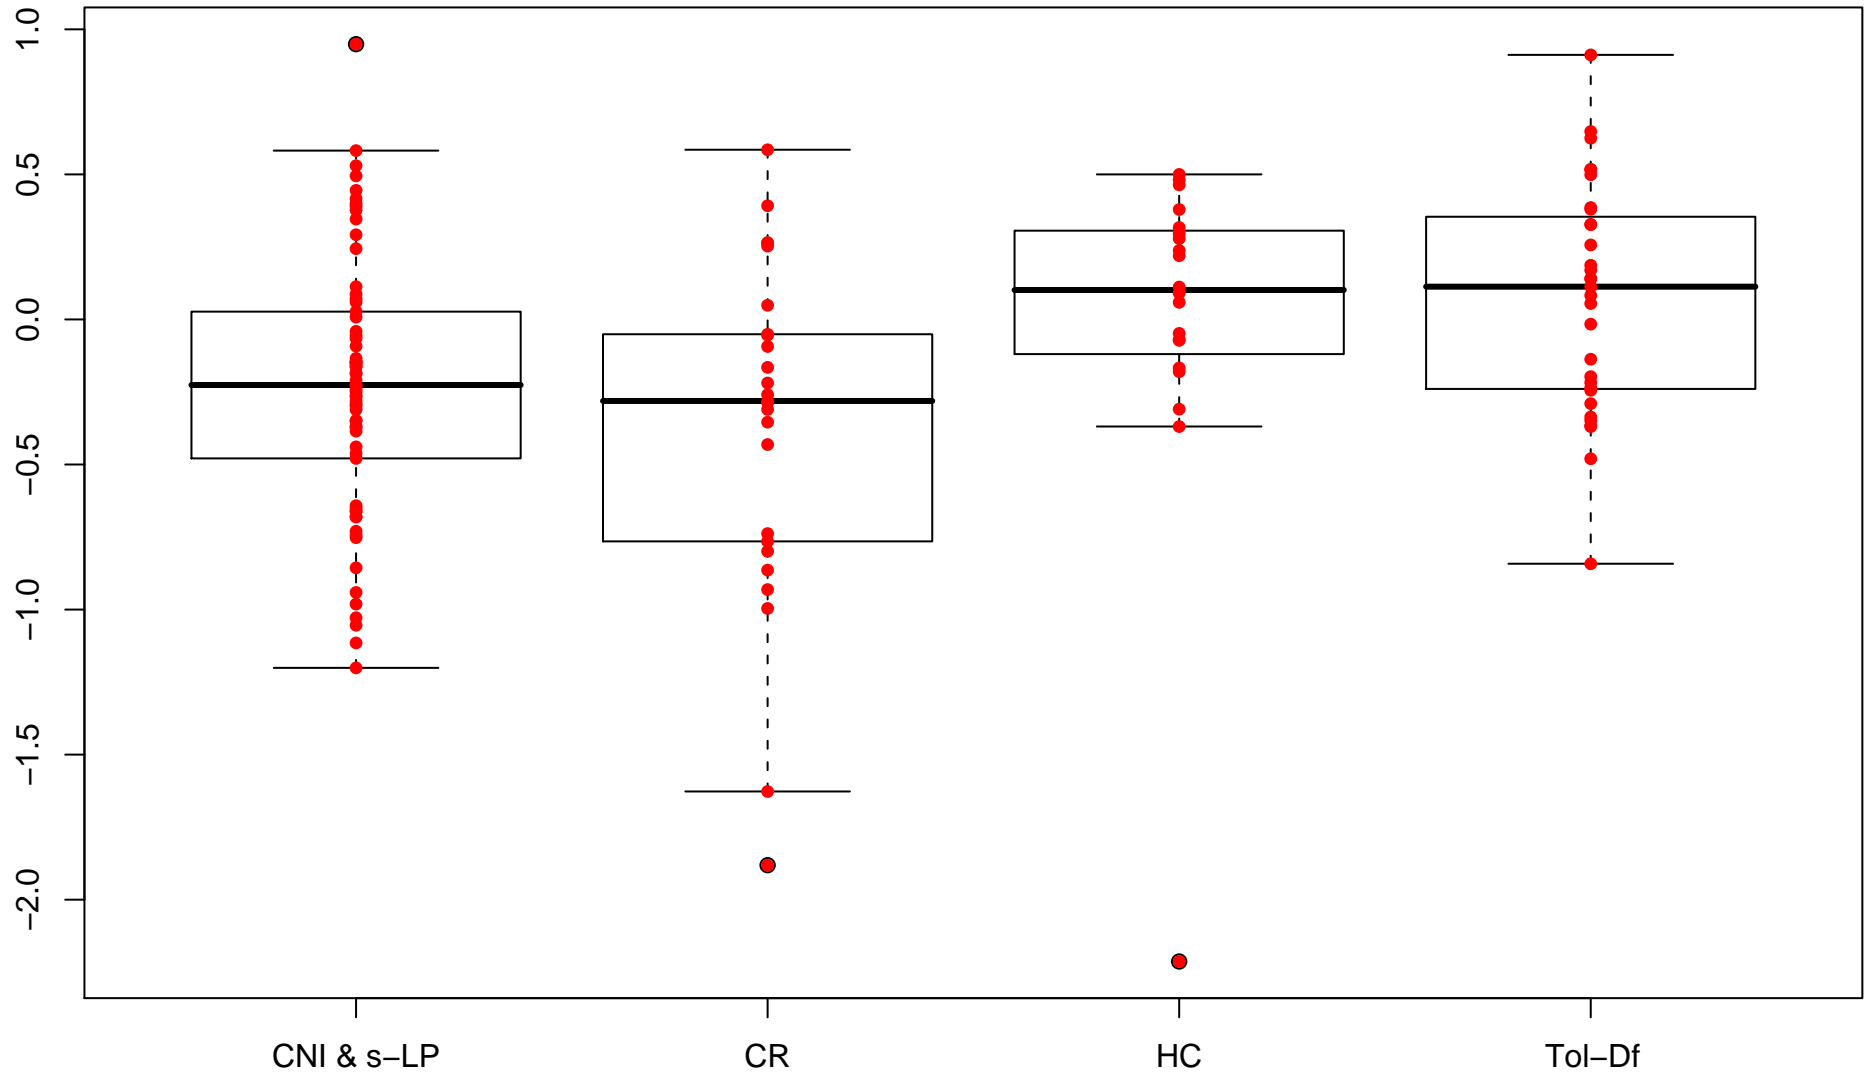

Rank 731 : FA2H  
0.0009644

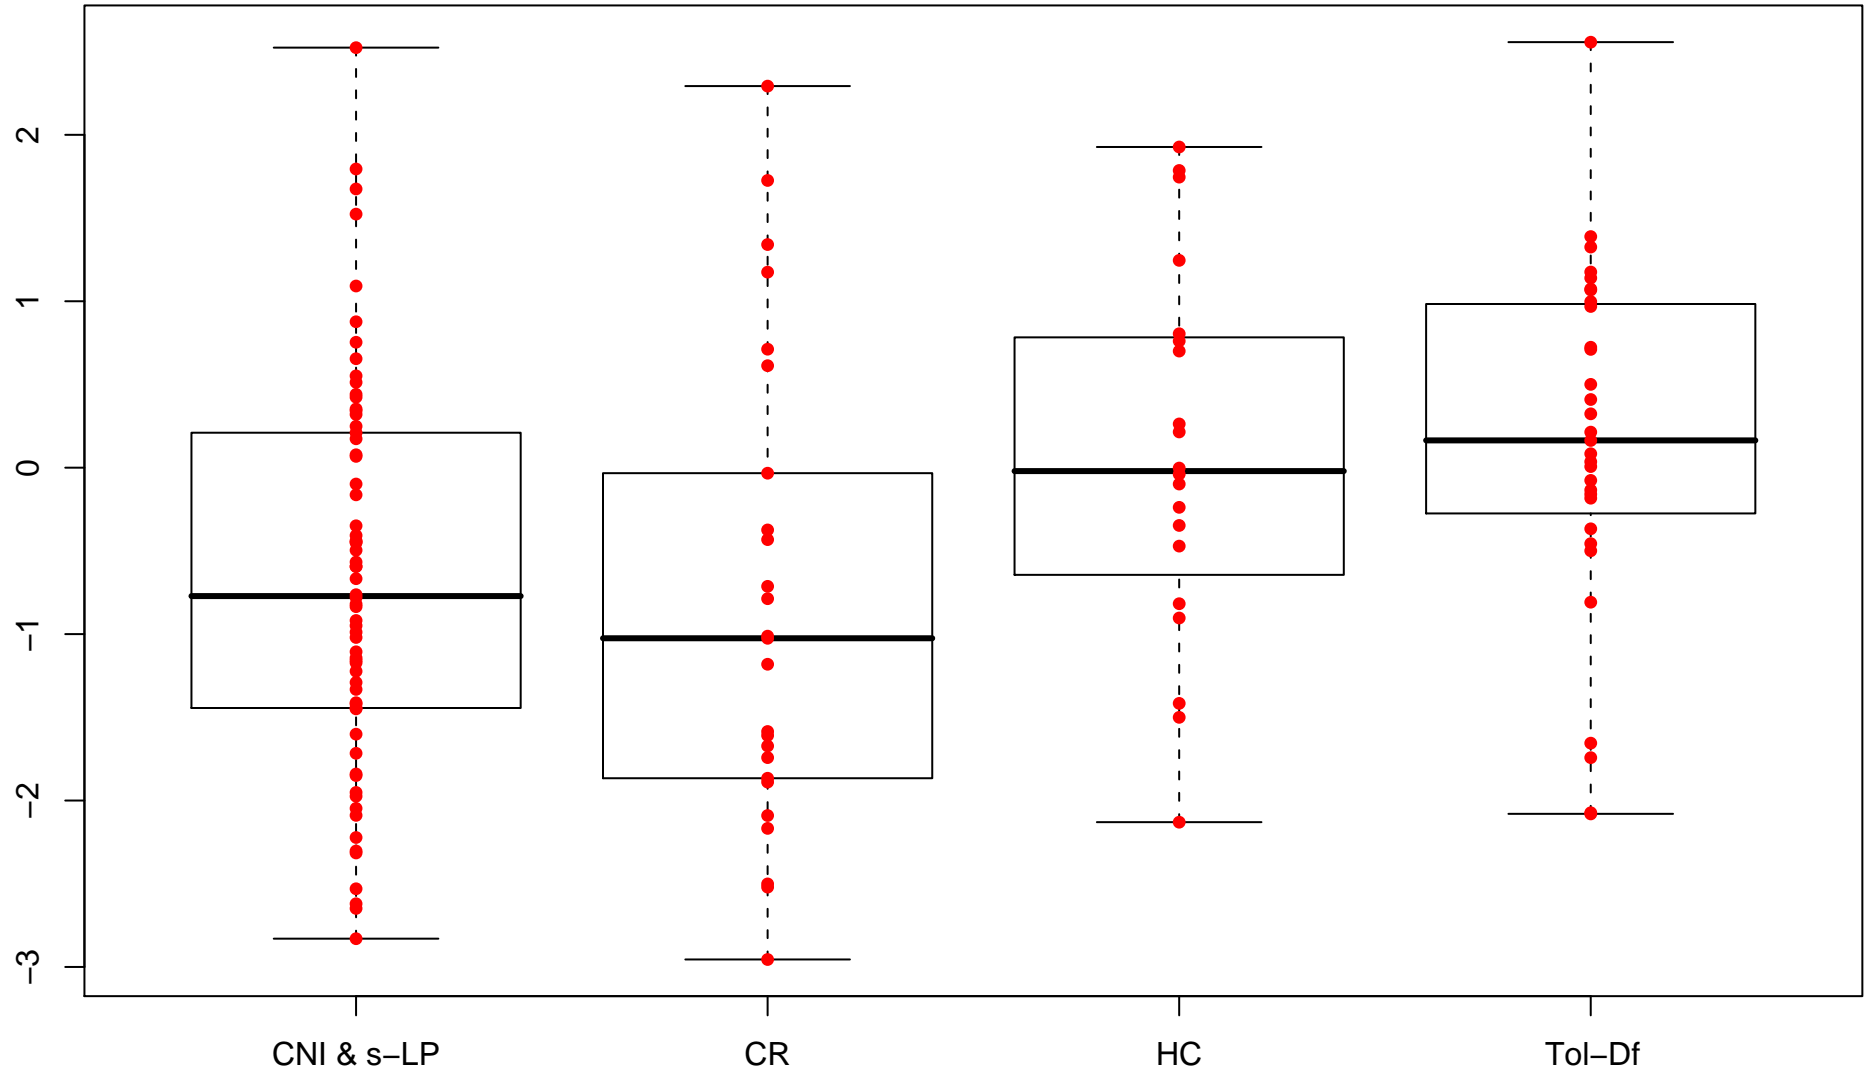

Rank 732 : MXD1  
0.0009655

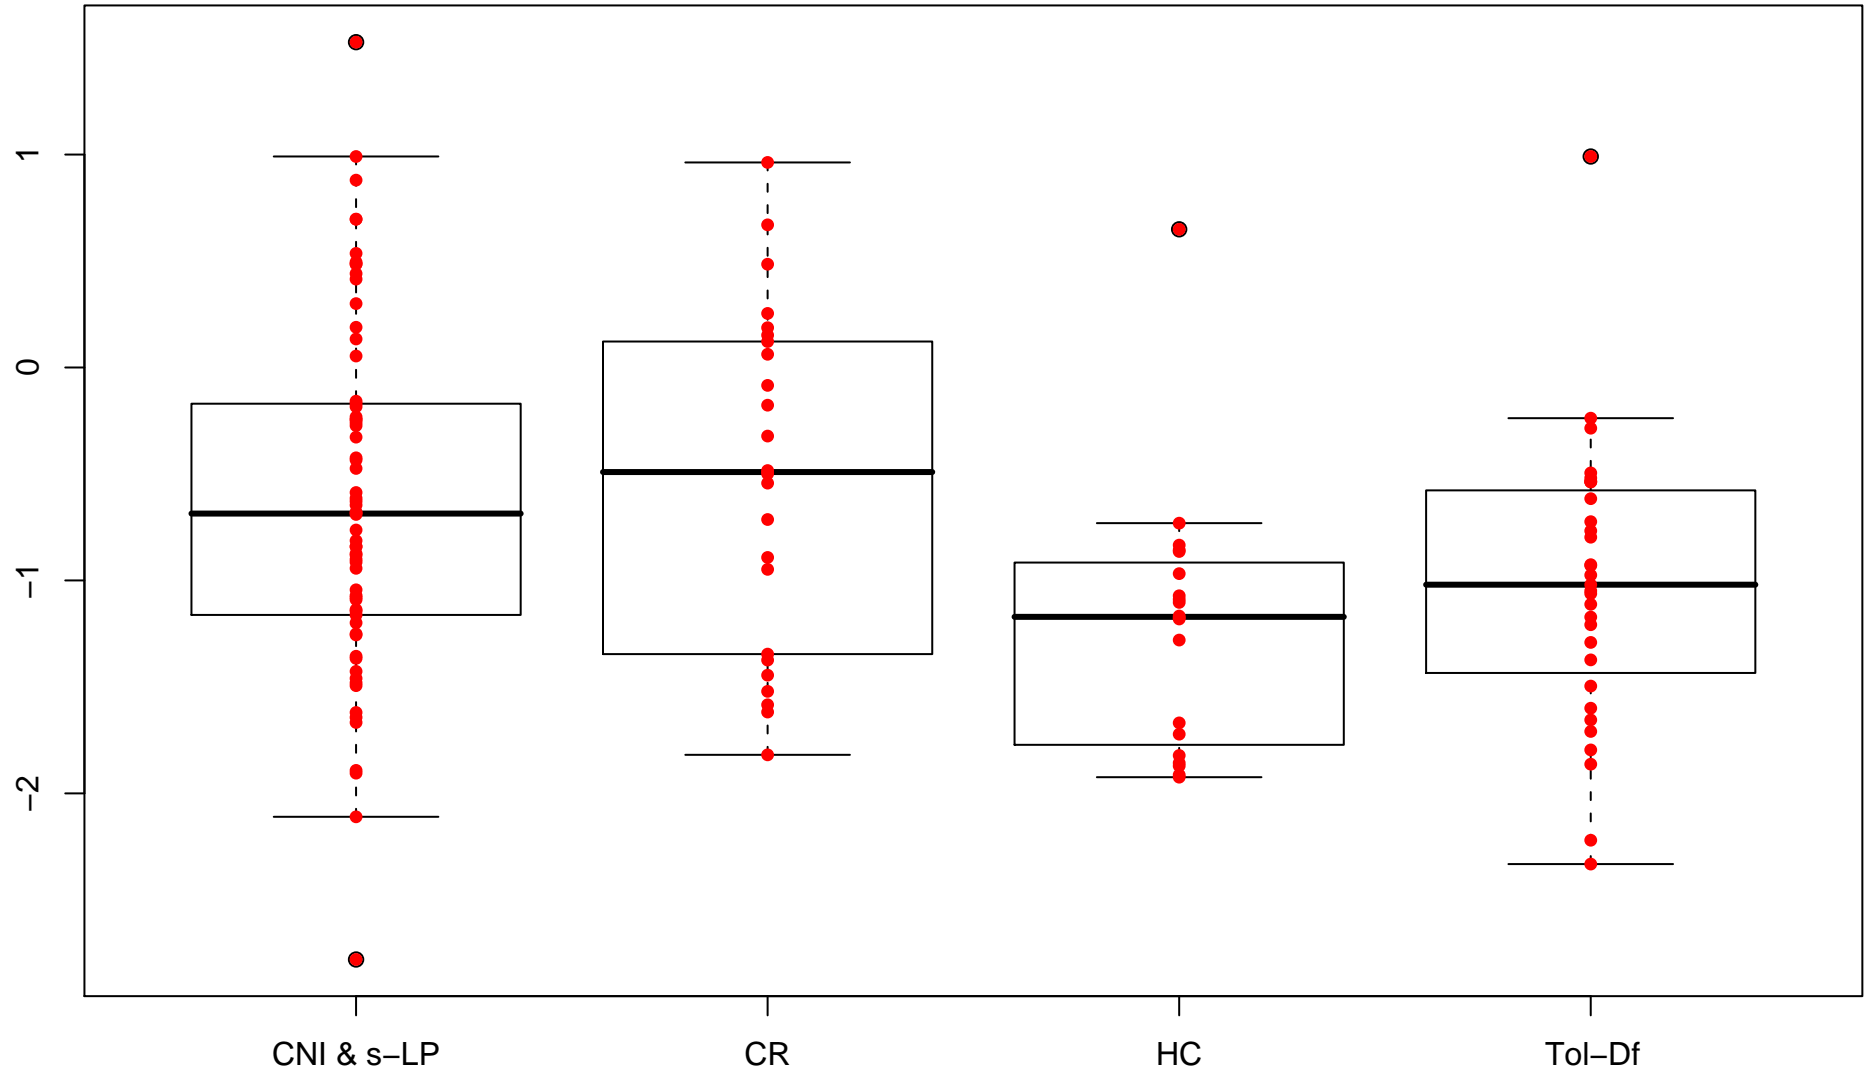

Rank 733 : ITSN2  
0.0009679

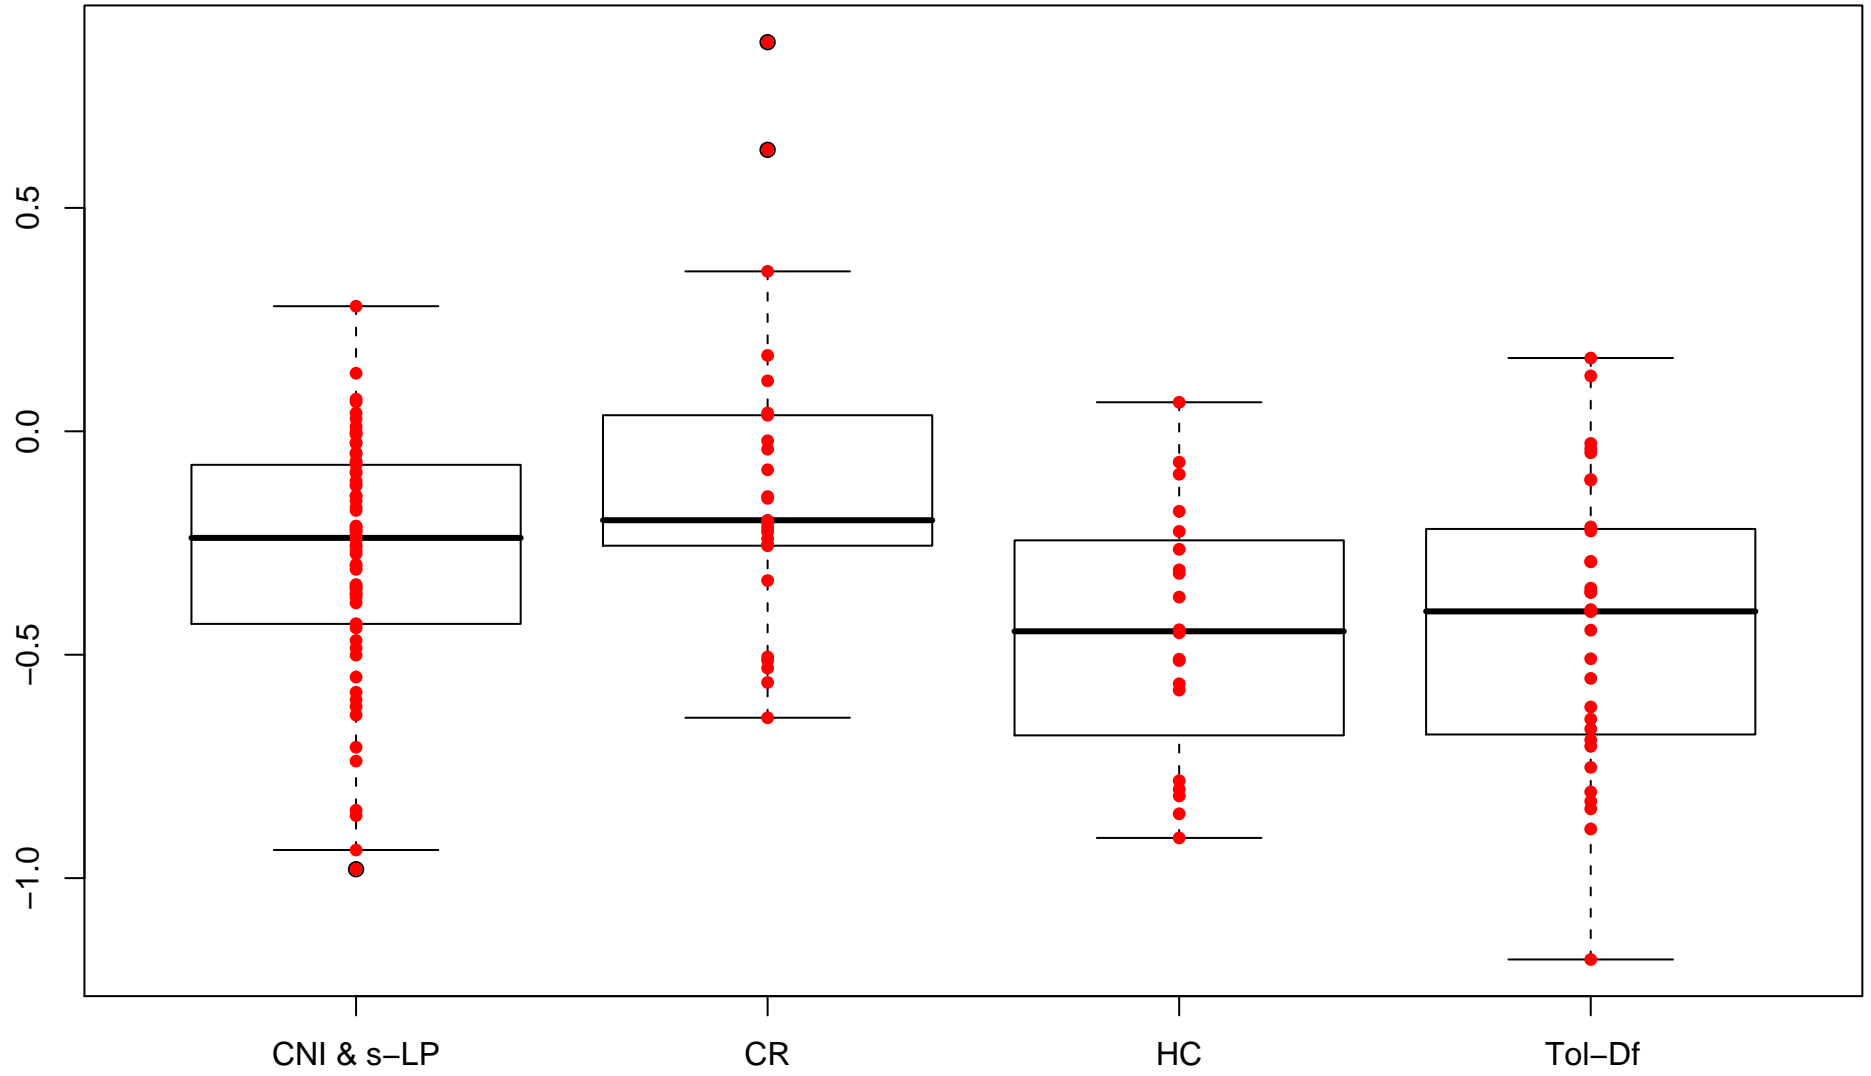

Rank 734 : POLG2  
0.0009744

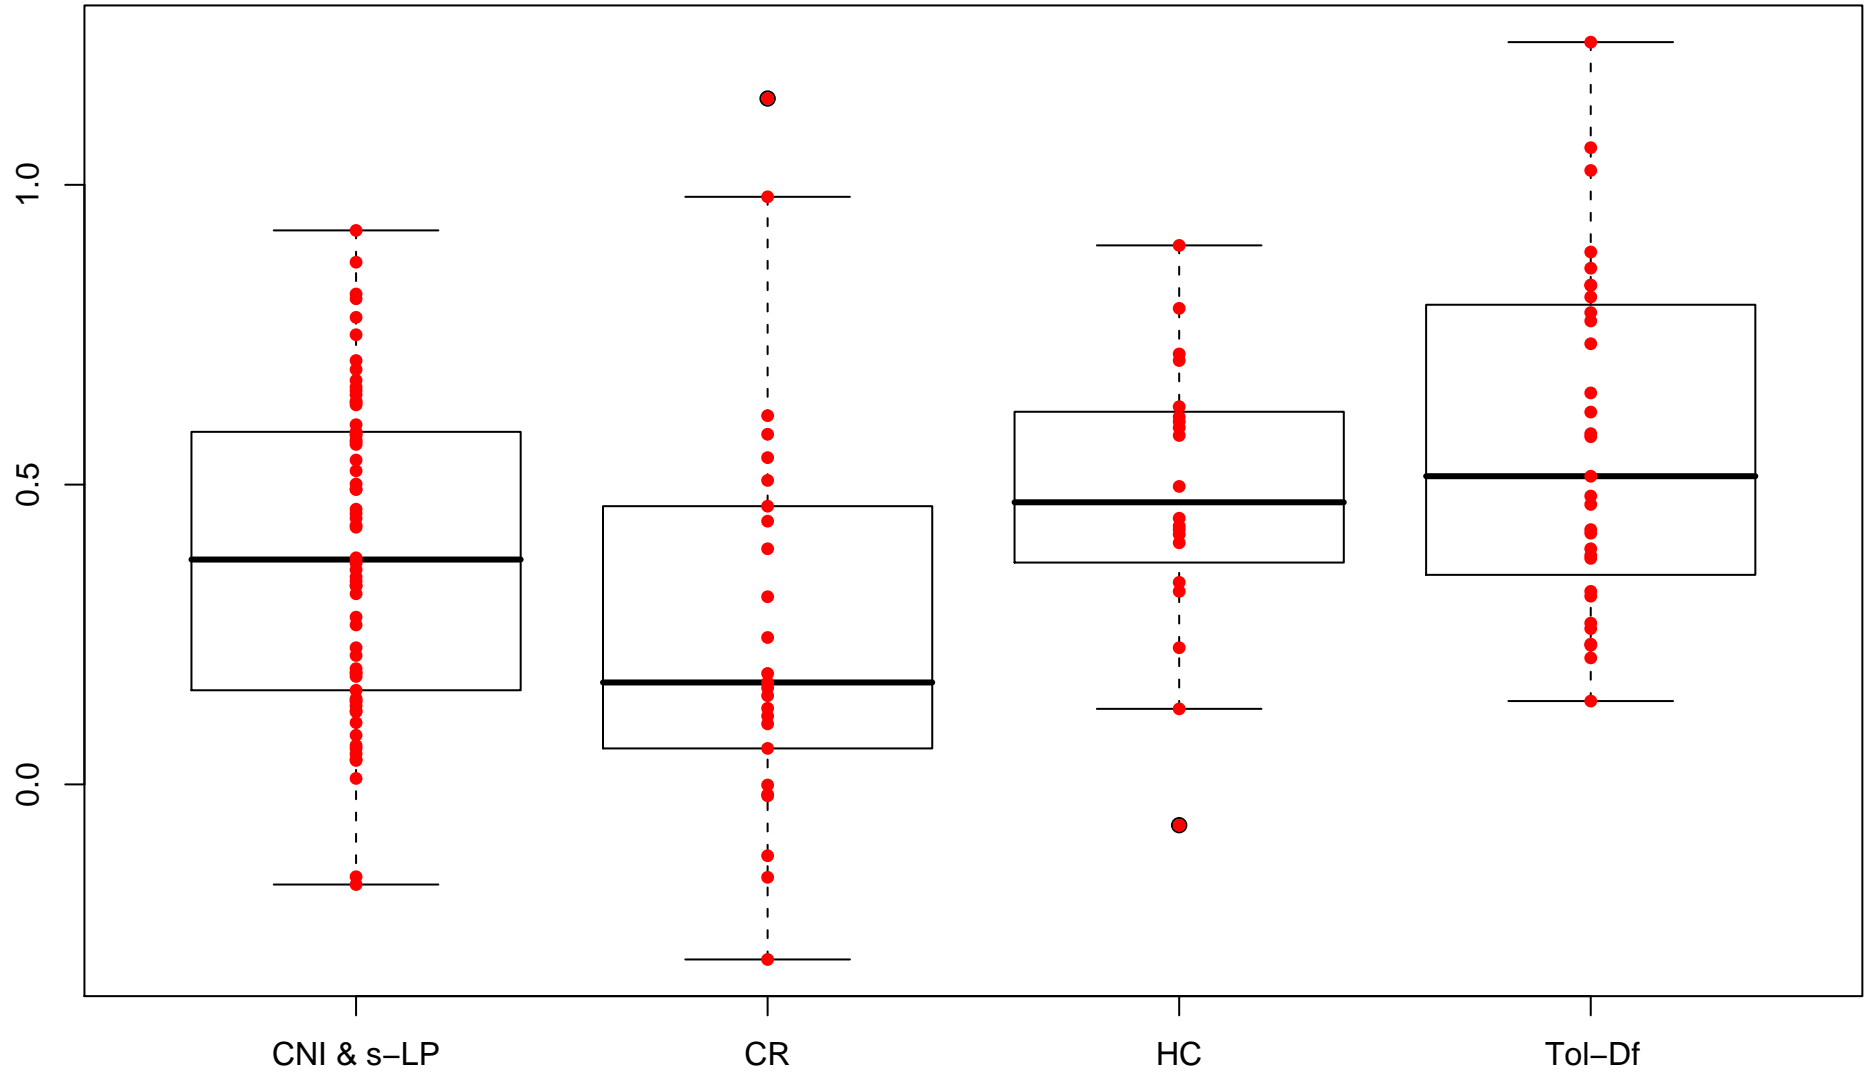

Rank 735 : BACE2  
0.0009772

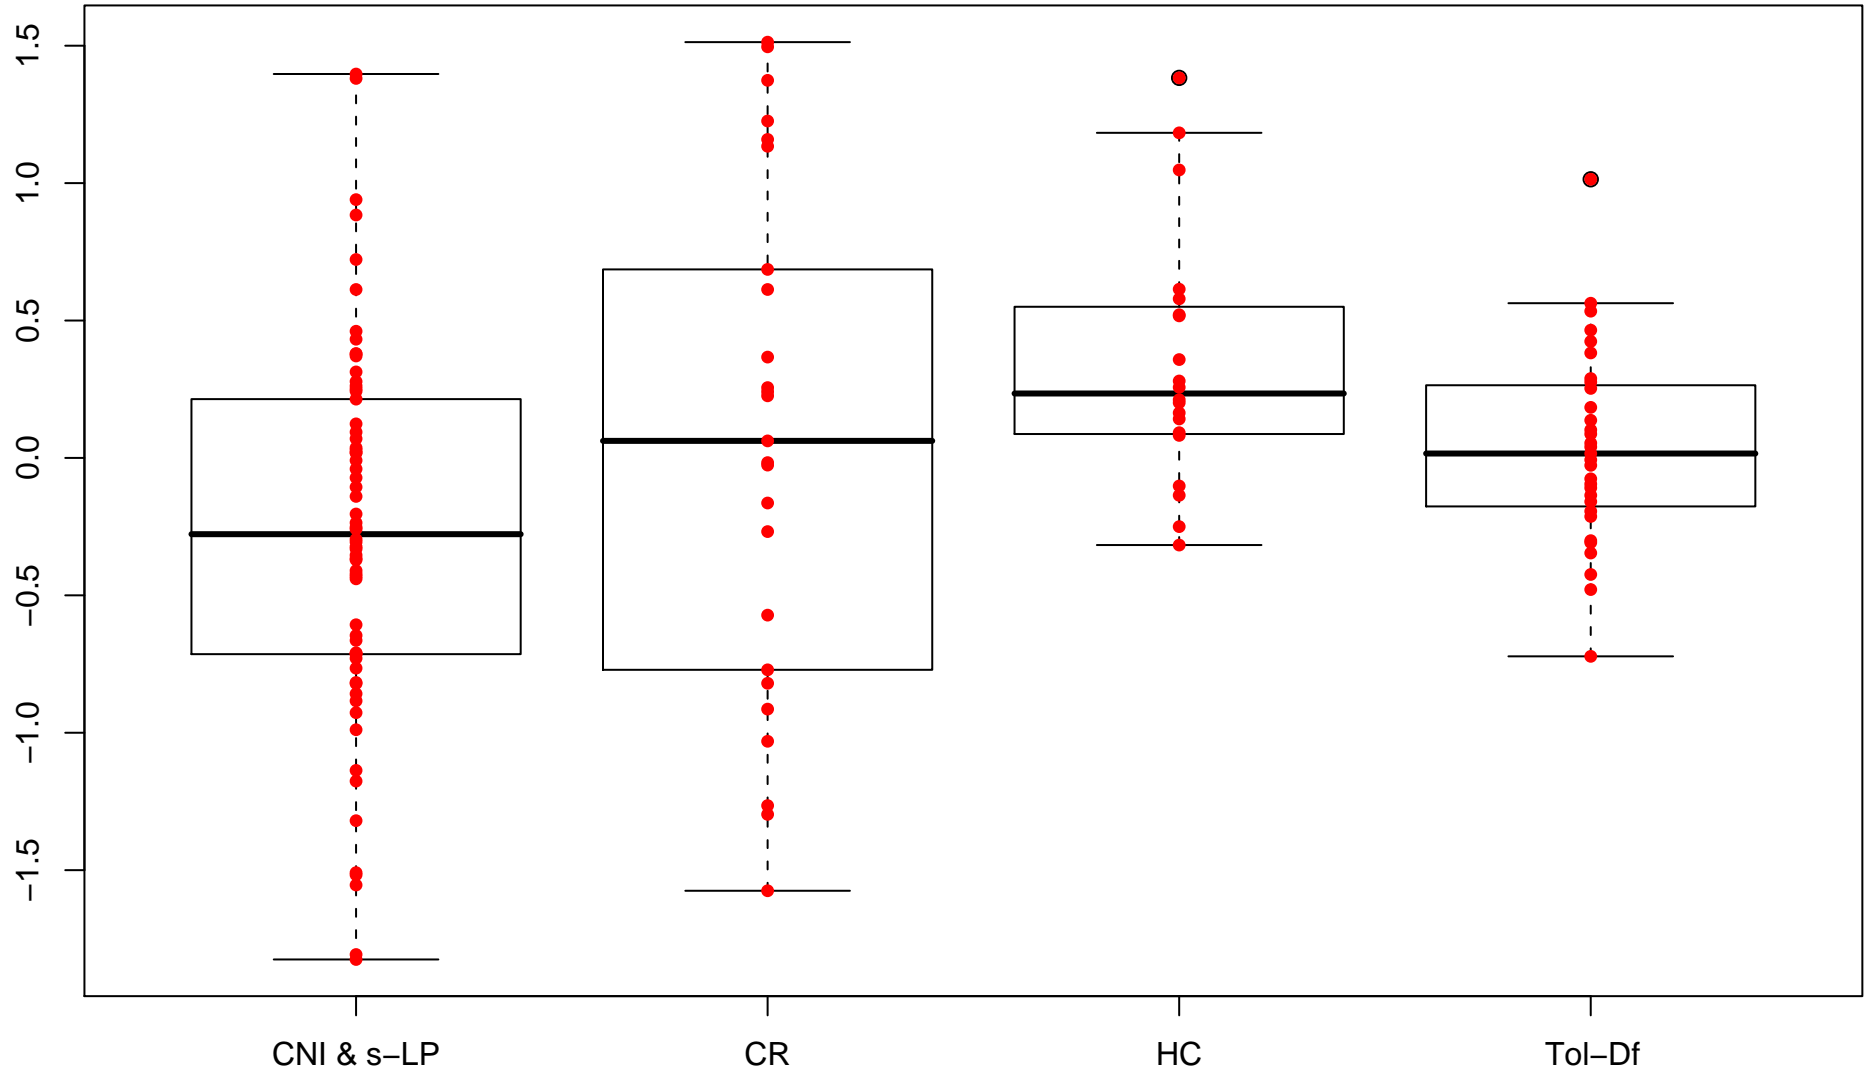



Rank 736 : SLC8A1  
0.0009826

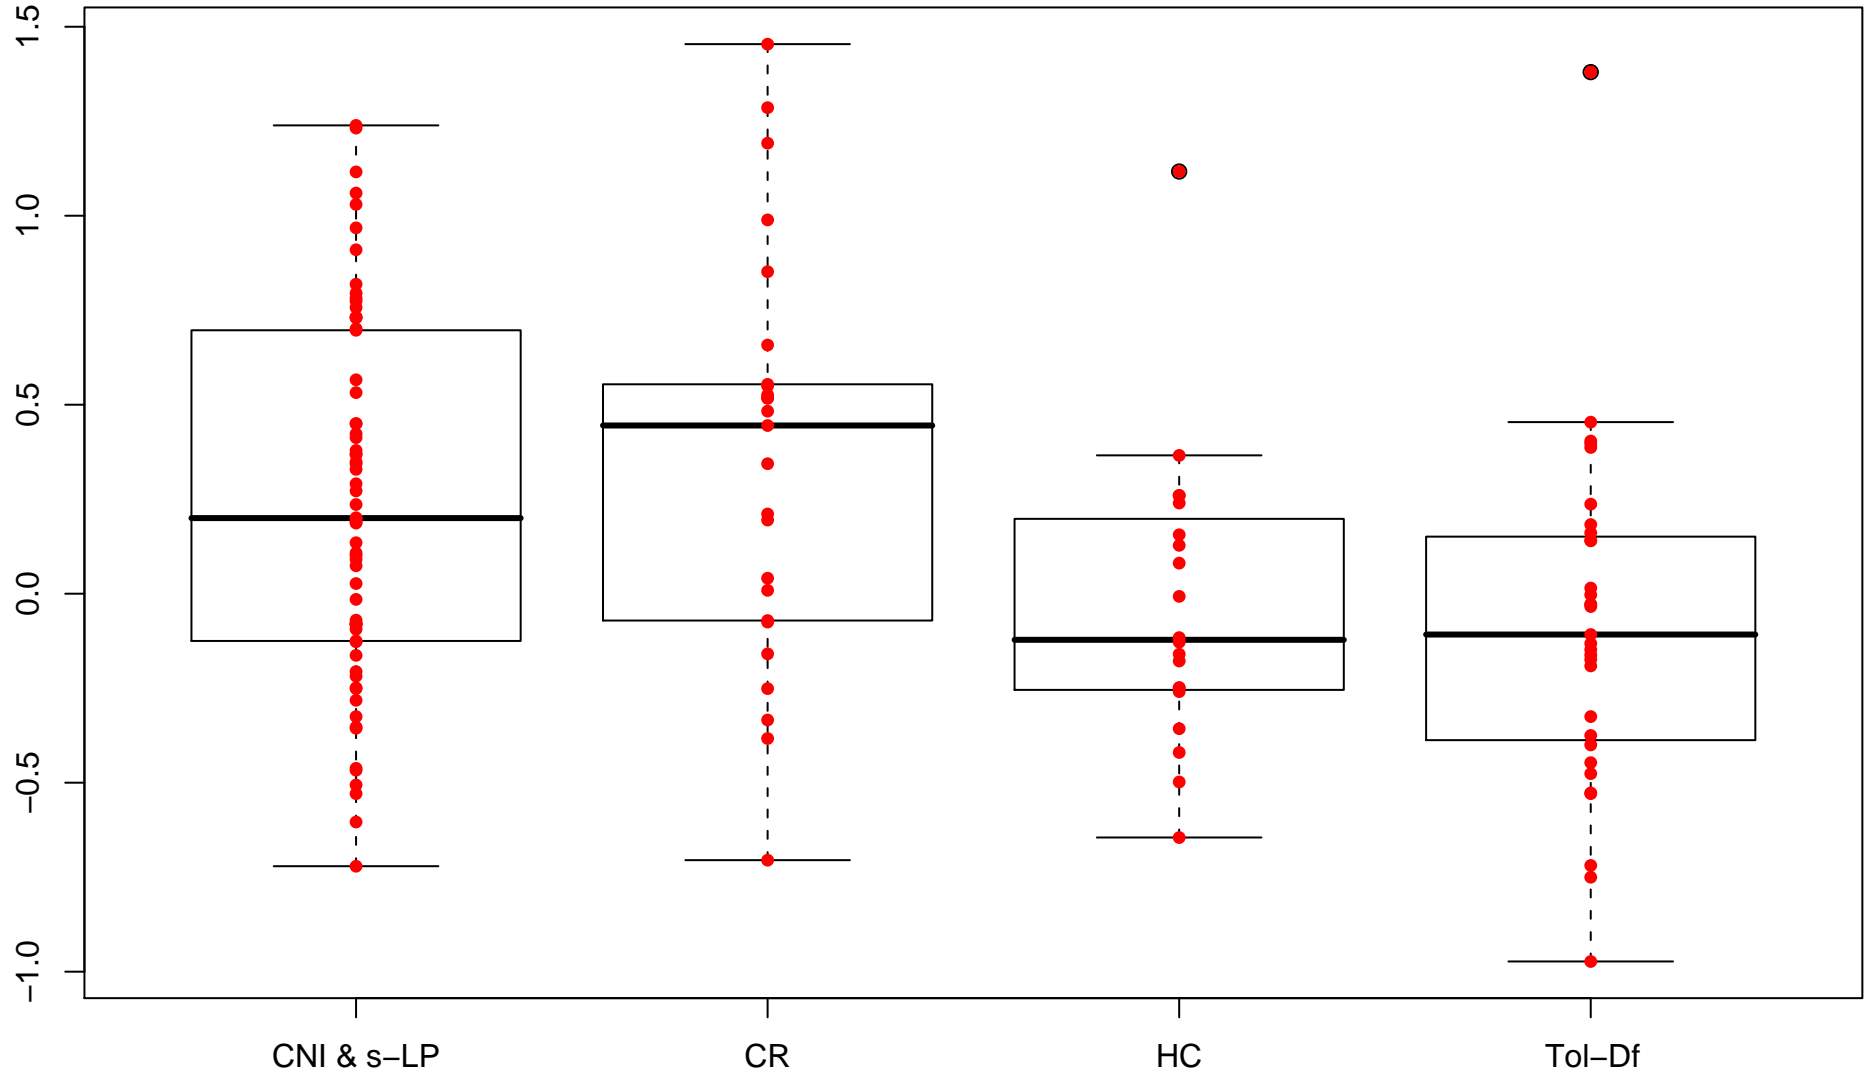

Rank 737 : L3MBTL3  
0.0009862

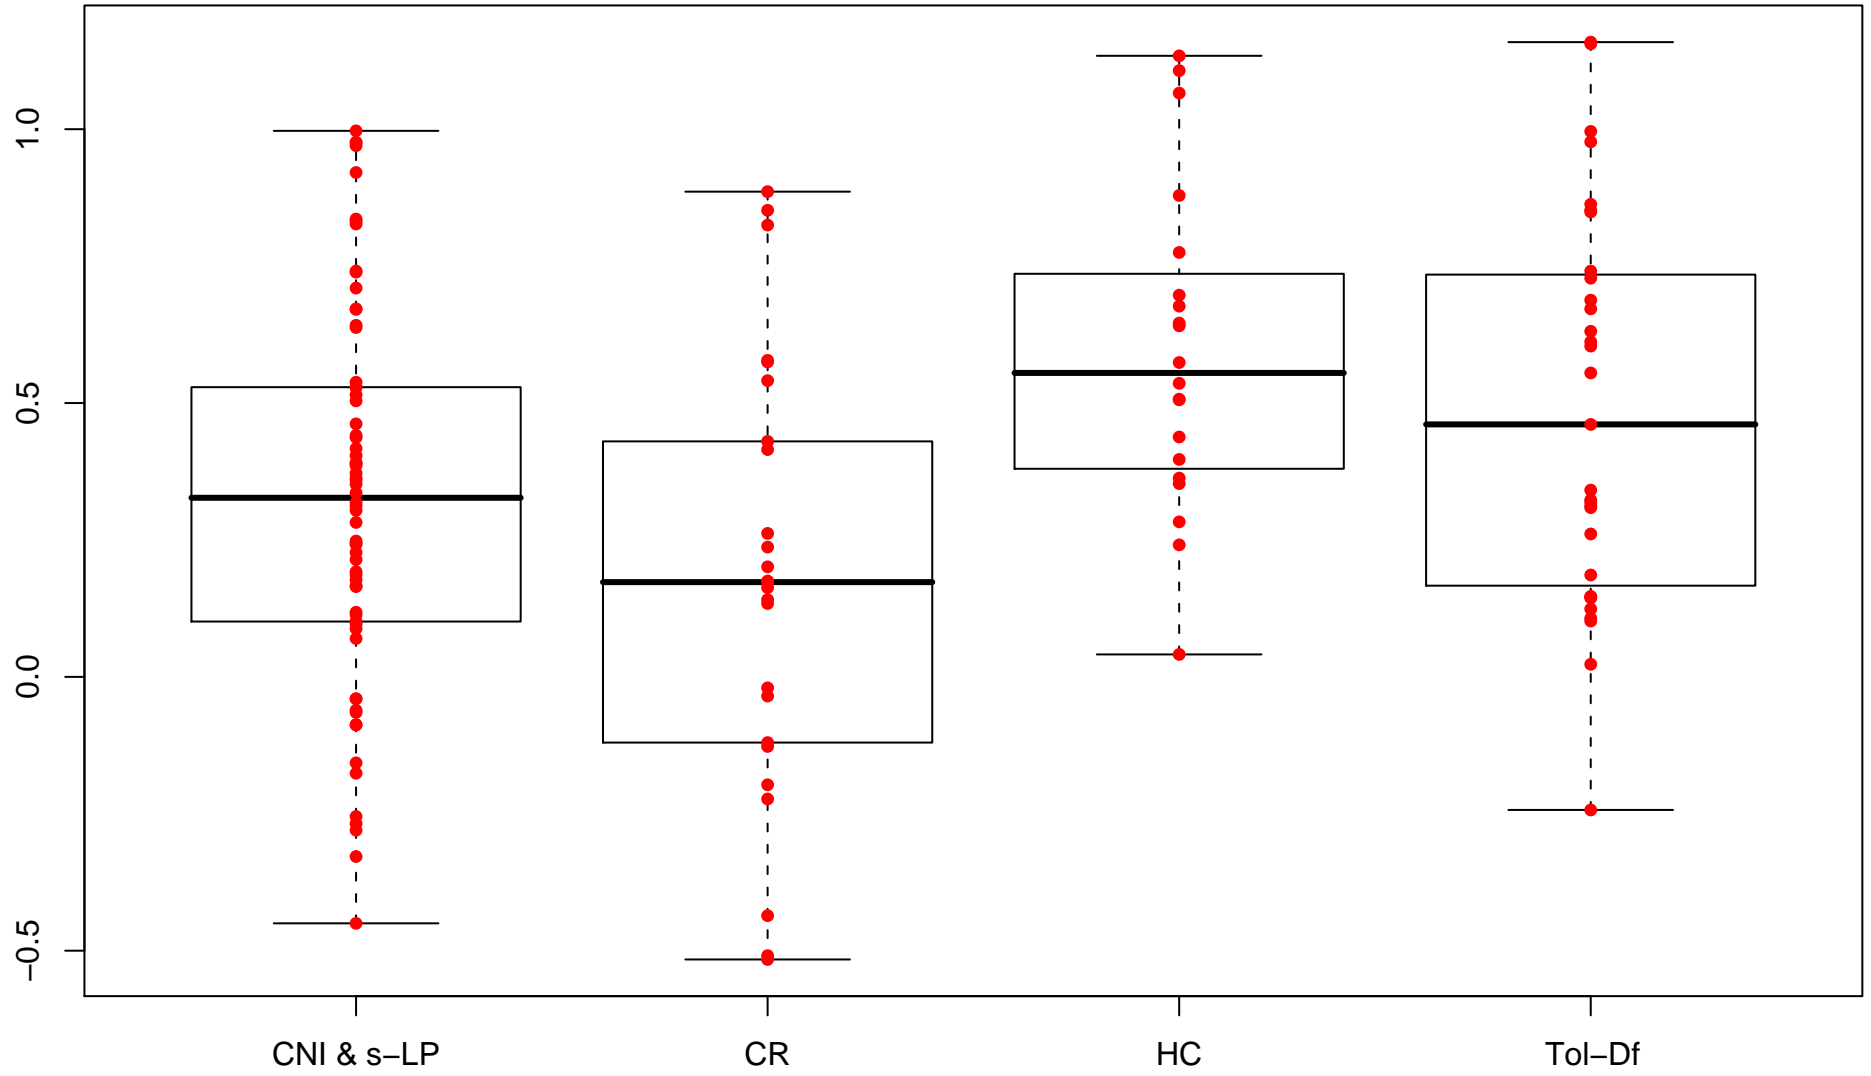

Rank 738 : ENTPD5  
0.0009902

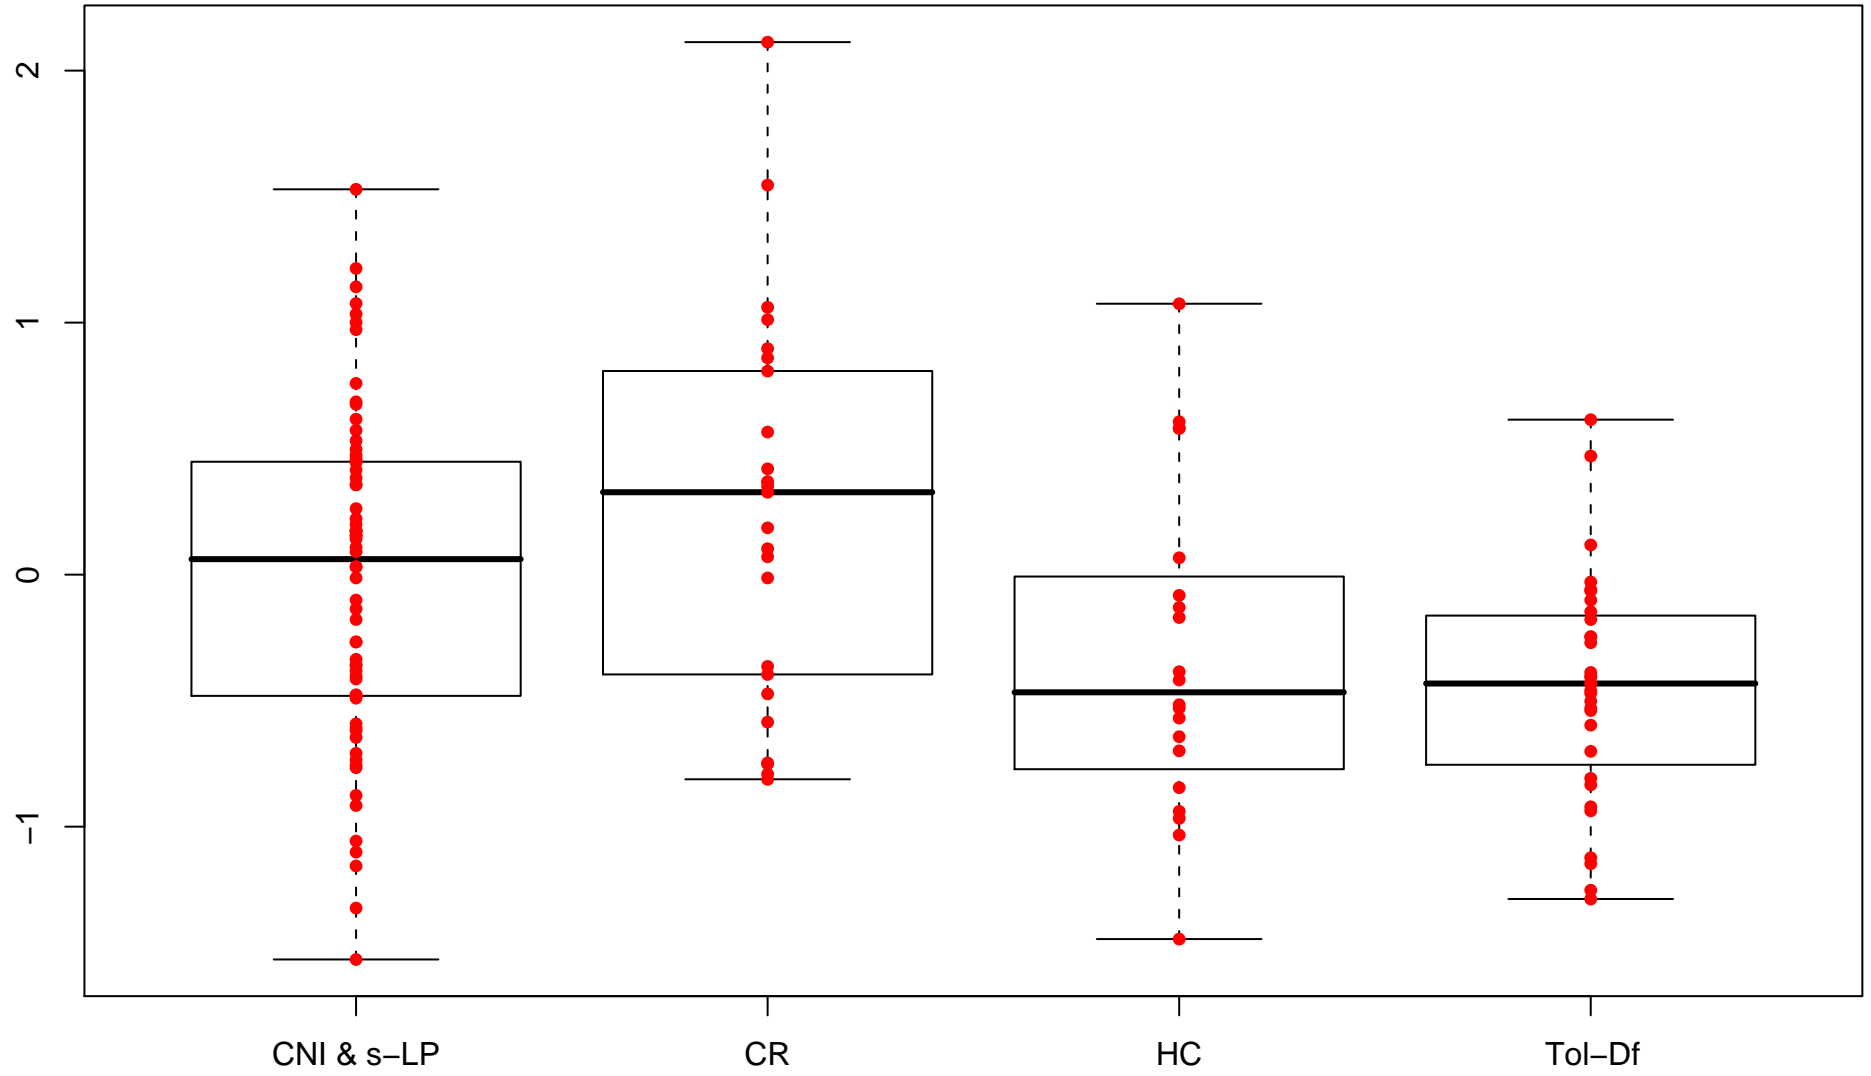

Rank 739 : KLHDC1  
0.000992

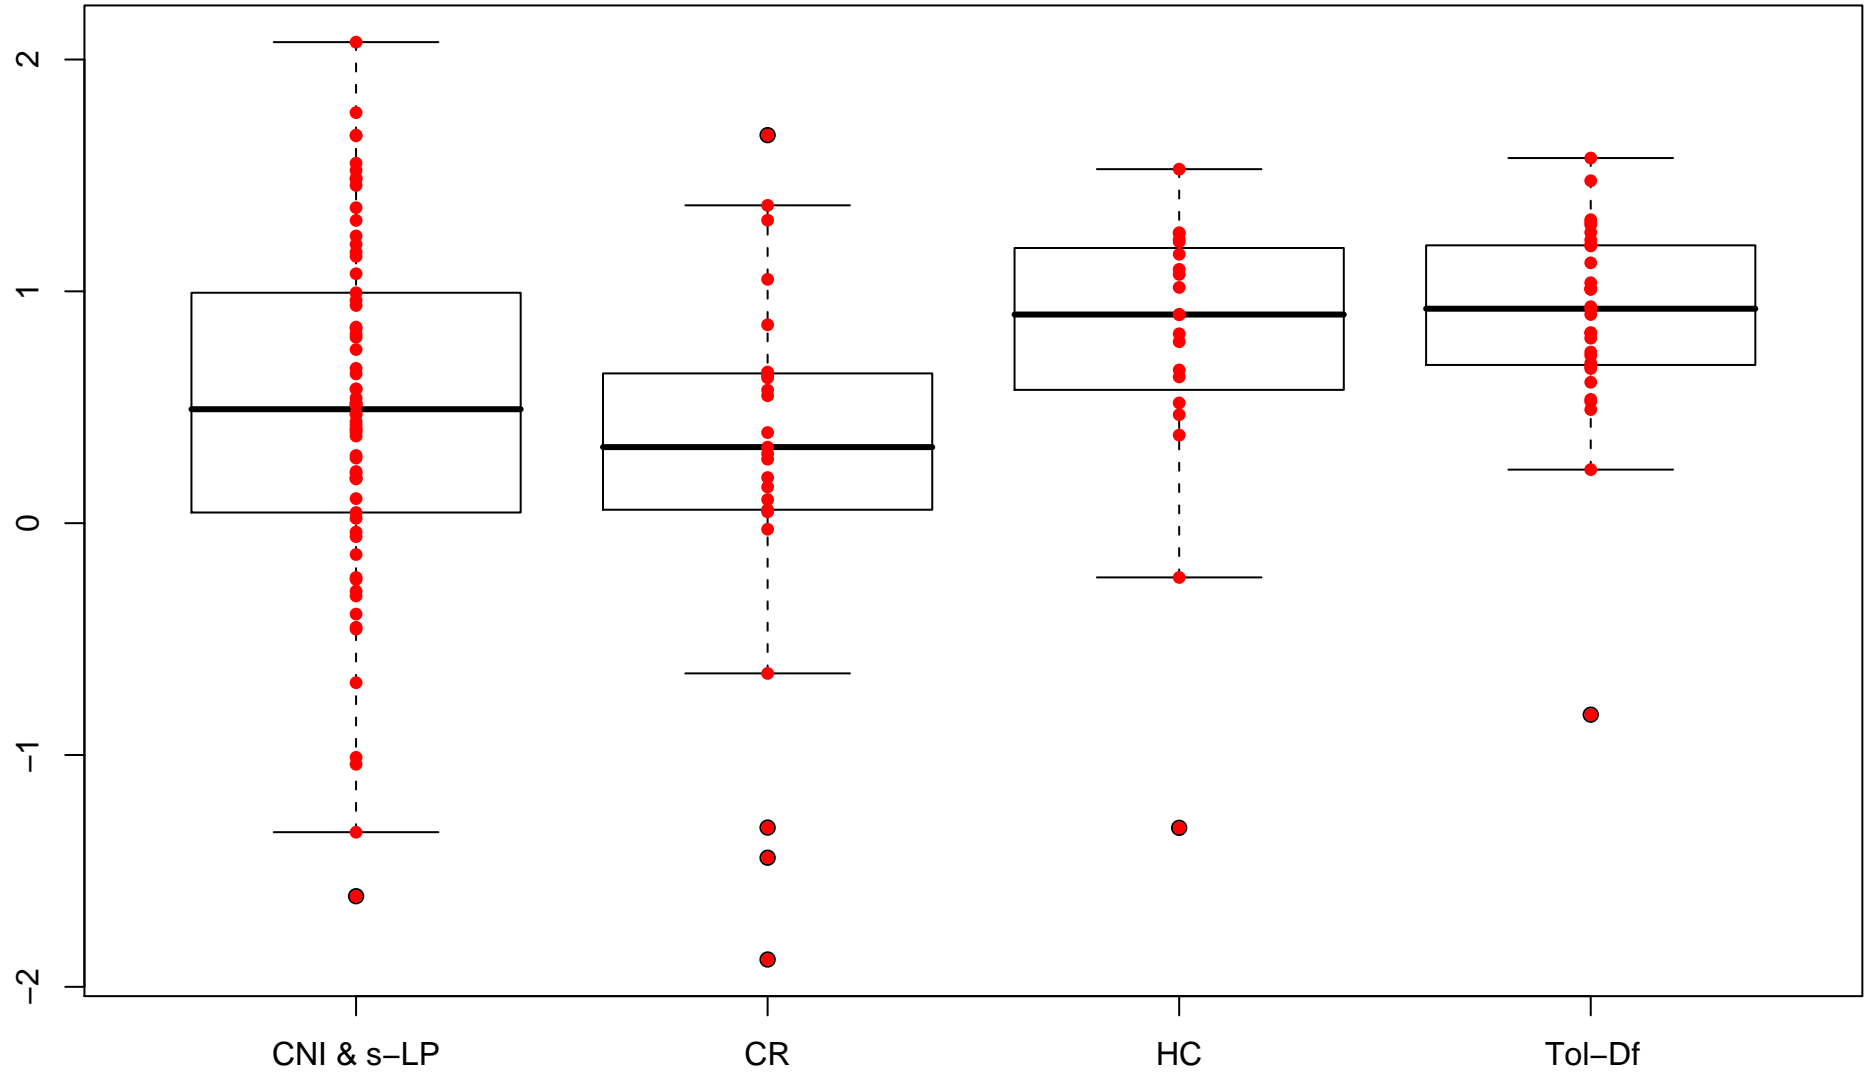

Rank 740 : CCR3  
0.0009967

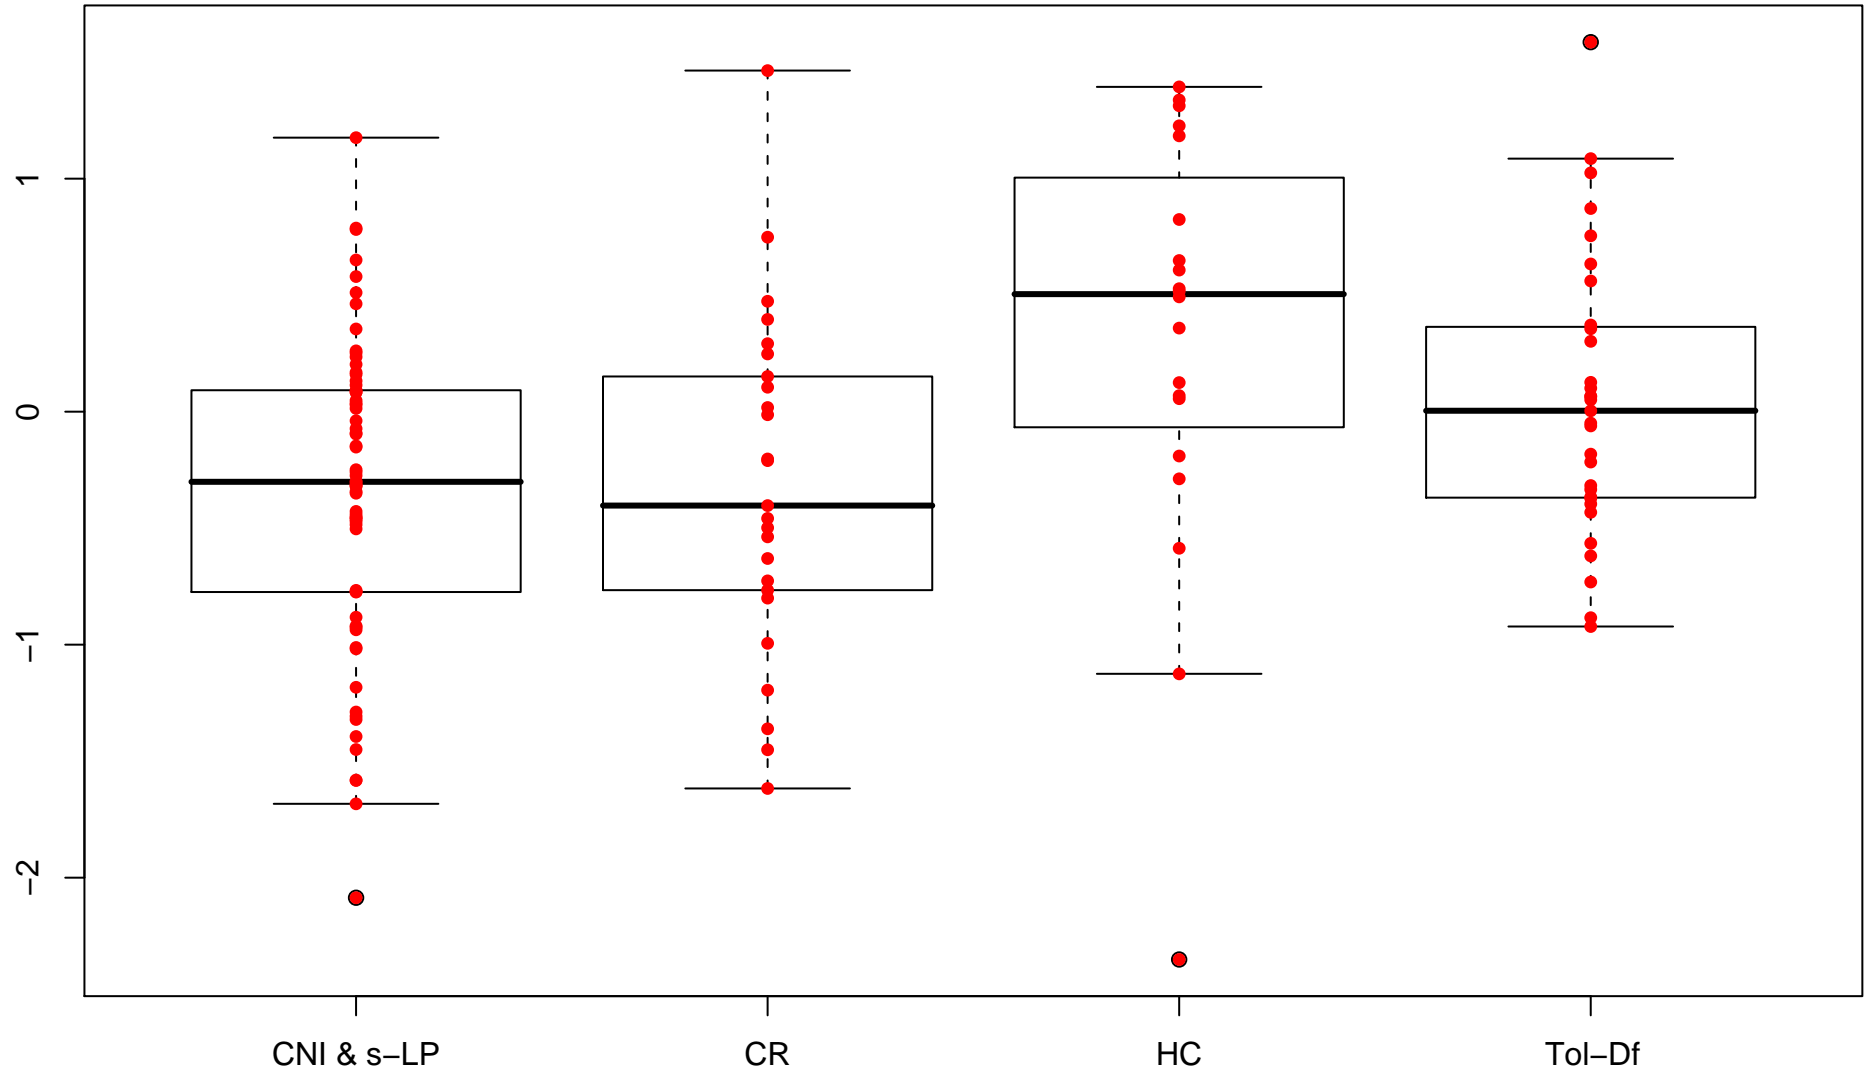

Rank 741 : STARD9  
0.0010151

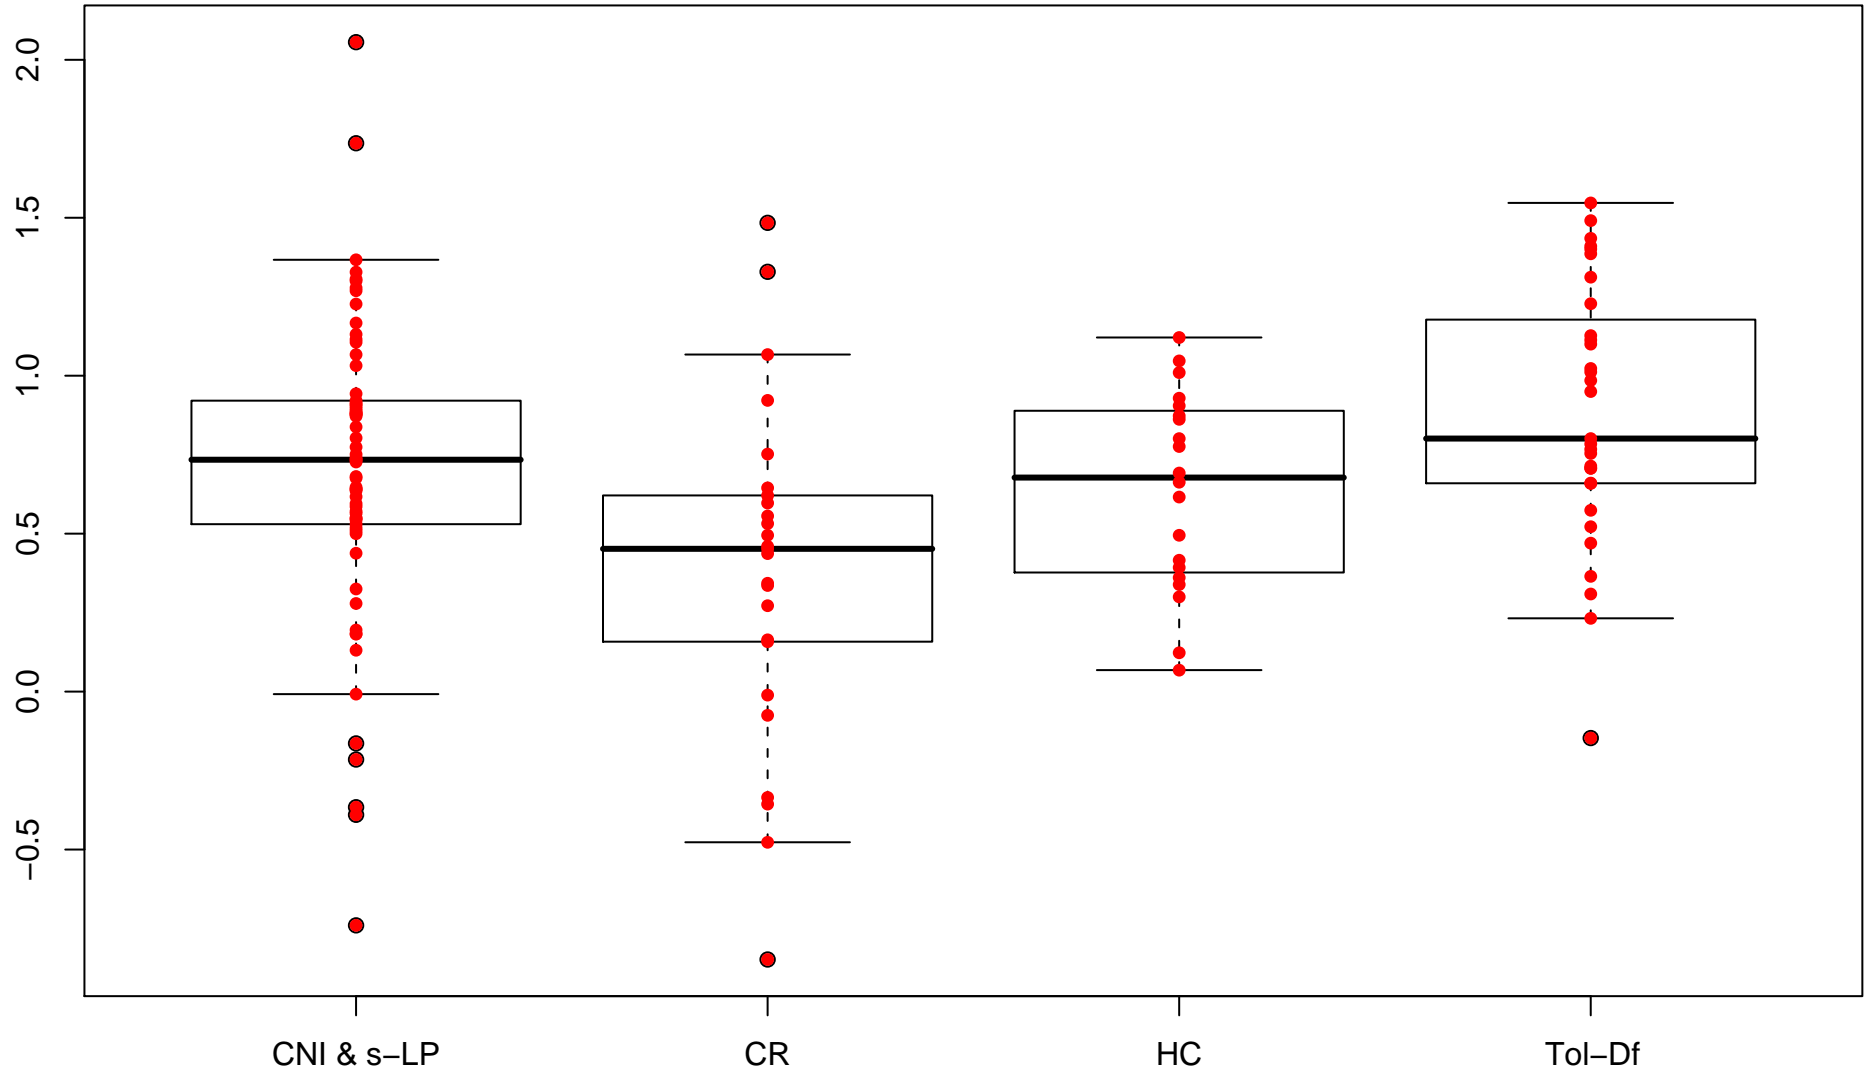

Supplemental Figure 6

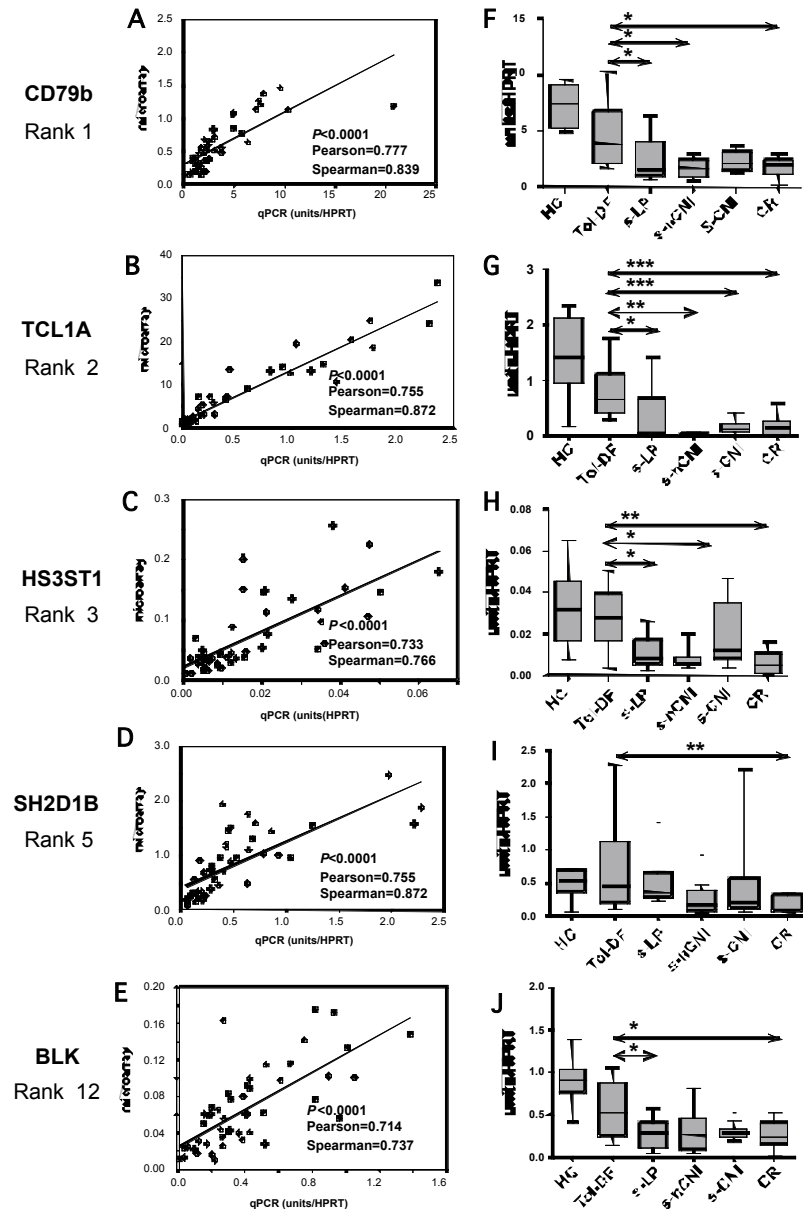

**Supplemental Figure 6. Correlation of gene expression analysis within the *training set* determined by microarray and qRT-PCR methods.** Correlation of gene expression by microarray and qRT-PCR for selected genes that displayed significantly differential expression (A – E) for *training set*. Signal intensity data of each probe on the microarray was calculated for each patient and expression relative to HPRT was then calculated for each gene as  $\log_2$  [gene of interest] -  $\log_2$  [HPRT]. qRT-PCR data are depicted as units / HPRT . Pearson and Spearman rank correlation coefficients and p-values are shown. RT-PCR gene expression data for the same set of genes is shown in F – J). Median Box-plots show median and interquartile range. Whiskers above and below the box indicate the 5<sup>th</sup> and 95<sup>th</sup> percentiles. Statistical comparison between groups was assessed by Mann-Whitney U test and significant p values are shown (\* $p < 0.05$ , \*\*  $p < 0.01$ , \*\*\*  $p < 0.001$ ).

## Supplemental Figure 7

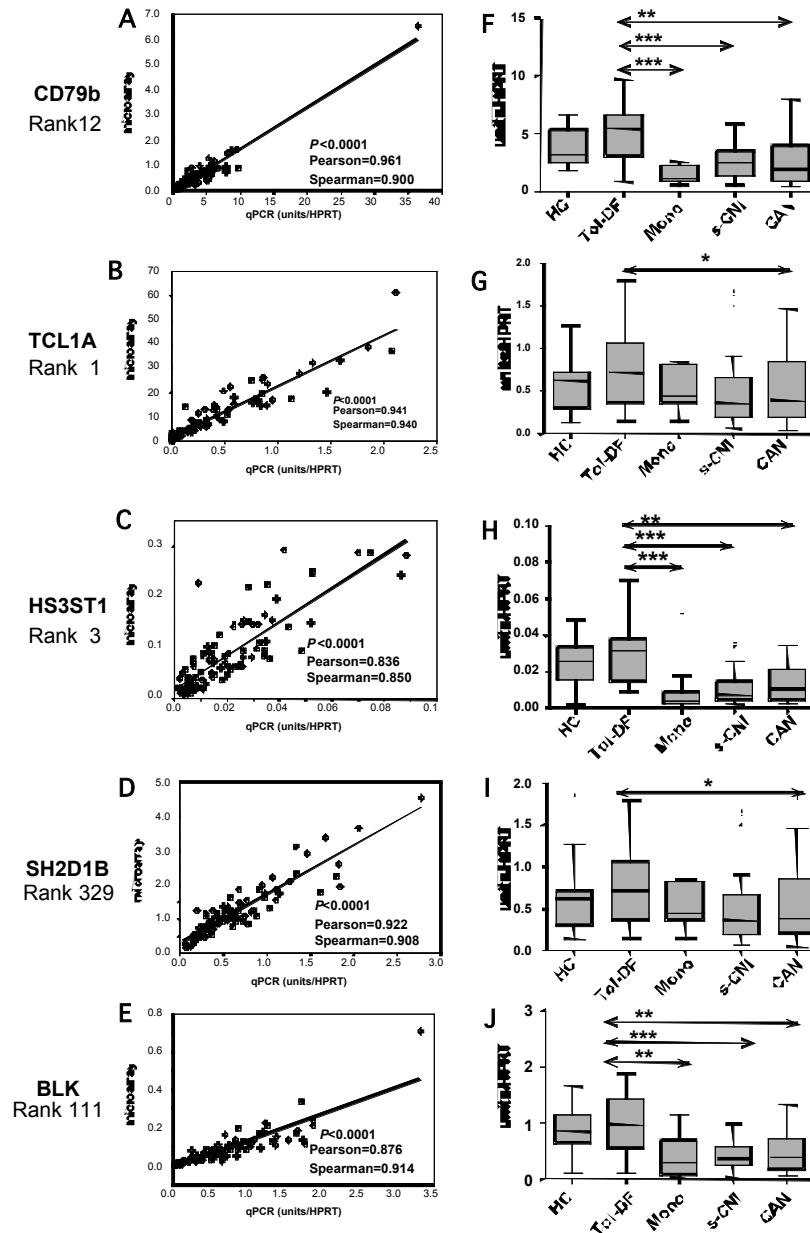

**Supplemental Figure 7. Correlation of gene expression analysis within the *test set* determined by microarray and qRT-PCR methods.** Correlation of gene expression by microarray and qRT-PCR for selected genes that displayed significantly differential expression (A – E) for *test set*. Signal intensity data of each probe on the microarray was calculated for each patient and expression relative to HPRT was then calculated for each gene as  $\log_2 [\text{gene of interest}] - \log_2 [\text{HPRT}]$ . qRT-PCR data are depicted as units / HPRT . Pearson and Spearman rank correlation coefficients and p-values are shown. RT-PCR gene expression data for the same set of genes is shown in F – J). Box-plots show median and interquartile range. Whiskers above and below the box indicate the 5<sup>th</sup> and 95<sup>th</sup> percentiles. Statistical comparison between groups was assessed by Mann-Whitney U test and significant p values are shown (\* $p < 0.05$ , \*\*  $p < 0.01$ , \*\*\*  $p < 0.001$ ).



**Supplemental Table 1. Study group statistical comparisons of percentage distributions of peripheral blood lymphocyte subsets analysed by flow cytometry.** Two-sided p values for Mann-Whitney U tests performed between non-tolerant patient groups of (A) the *training set* and (B) the *test set* when analysing the percentage distribution of peripheral blood lymphocyte subsets by flow cytometry.

**Table 1A**

| <i>Training Set</i>                    | HC vs s-LP | HC vs s-nCNI | HC vs s-CNI | HC vs CR | s-LP vs s-nCNI | s-LP vs s-CNI | s-LP vs CR | s-nCNI vs s-CNI | s-nCNI vs CR | s-CNI vs CR |
|----------------------------------------|------------|--------------|-------------|----------|----------------|---------------|------------|-----------------|--------------|-------------|
| % T cells                              | n.s.       | 0.044        | n.s.        | n.s.     | 0.03           | 0.028         | n.s.       | n.s.            | n.s.         | n.s.        |
| % B cells                              | n.s.       | 0.001        | n.s.        | n.s.     | n.s.           | n.s.          | n.s.       | n.s.            | n.s.         | n.s.        |
| % NK cells                             | n.s.       | n.s.         | n.s.        | n.s.     | n.s.           | n.s.          | n.s.       | n.s.            | n.s.         | n.s.        |
| Ratio B/T                              | n.s.       | 0.002        | n.s.        | n.s.     | 0.044          | n.s.          | n.s.       | n.s.            | n.s.         | n.s.        |
| % CD4 <sup>+</sup> CD25 <sup>int</sup> | n.s.       | n.s.         | n.s.        | n.s.     | n.s.           | n.s.          | n.s.       | n.s.            | n.s.         | n.s.        |
| % CD4 <sup>+</sup> CD25 <sup>hi</sup>  | n.s.       | n.s.         | n.s.        | n.s.     | n.s.           | 0.026         | n.s.       | n.s.            | n.s.         | n.s.        |

**Table 1B**

| <i>Test Set</i>                        | HC vs Mono | HC vs s-CNI | HC vs CAN | Mono vs s-CNI | Mono vs CAN | s-CNI vs CAN |
|----------------------------------------|------------|-------------|-----------|---------------|-------------|--------------|
| % T cells                              | n.s.       | 0.006       | n.s.      | 0.025         | n.s.        | 0.033        |
| % B cells                              | <0.001     | <0.001      | 0.046     | n.s.          | n.s.        | n.s.         |
| % NK cells                             | n.s.       | n.s.        | n.s.      | 0.009         | n.s.        | n.s.         |
| Ratio B/T                              | <0.001     | 0.001       | n.s.      | n.s.          | n.s.        | n.s.         |
| % CD4 <sup>+</sup> CD25 <sup>int</sup> | 0.016      | 0.002       | 0.005     | n.s.          | n.s.        | n.s.         |
| % CD4 <sup>+</sup> CD25 <sup>hi</sup>  | 0.001      | 0.004       | n.s.      | n.s.          | n.s.        | n.s.         |

**Supplemental Table 2: Study group statistical comparisons of the ratio of FoxP3 and  $\alpha$ 1,2-mannosidase expression detected in peripheral blood.** Two-sided p values for the Mann-Whitney U test performed on the calculated ratio of FoxP3 and  $\alpha$ 1,2-mannosidase expression between non-tolerant patient groups of the (A) the *training set* and (B) the *test set*.

**Table 2A**

| <i>Training Set</i> | HC vs s-LP | HC vs s-nCNI | HC vs s-CNI | HC vs CR | s-LP vs s-nCNI | s-LP vs s-CNI | s-LP vs CR | s-nCNI vs s-CNI | s-nCNI vs CR | s-CNI vs CR |
|---------------------|------------|--------------|-------------|----------|----------------|---------------|------------|-----------------|--------------|-------------|
| <b>P values</b>     | 0.004      | <0.001       | <0.001      | <0.001   | n.s.           | 0.005         | <0.001     | n.s.            | 0.013        | 0.002       |

**Table 2B**

| <i>Test Set</i> | HC vs Mono |  | HC vs s-CNI | HC vs CAN |  | Mono vs s-CNI | Mono vs CAN |  |  | s-CNI vs CAN |
|-----------------|------------|--|-------------|-----------|--|---------------|-------------|--|--|--------------|
| <b>P values</b> | 0.004      |  | <0.001      | <0.001    |  | n.s.          | n.s.        |  |  | n.s.         |

**Supplemental Table 3A. List of probes within the *training* and *test* sets with significant differential expression identified by four-class analysis of microarray data.**

Complete list of 260 probes within (A) *training set* and 1378 probes within (B) *test set* with significant differential expression identified following four-class analysis, listed in order of ranked significance, with corresponding microarray probe ID and EntrezGene ID (where assigned). Probes were ranked on p values by Kruskal-Wallis test with adjustment for False Discovery Rate (FDR) at 1%.

| <i>Training set</i> |            |               |                           |         |
|---------------------|------------|---------------|---------------------------|---------|
| Rank                | Gene Name  | EntrezGene ID | Probe ID                  | P       |
| 1                   | CD79B      | 974           | A_23_P207201_riset1       | 7.3E-05 |
| 2                   | TCL1A      | 8115          | A_23_P357717_riset1       | 7.7E-05 |
| 3                   | HS3ST1     | 9957          | A_23_P121657_riset1       | 7.7E-05 |
| 4                   | TCL1A      | 8115          | MIL_PPPID394307780_riset1 | 7.8E-05 |
| 5                   | SH2D1B     | 117157        | A_32_P324533_riset1       | 9.0E-05 |
| 6                   | MS4A1      | 931           | MIL_PPPID394453510_riset1 | 9.6E-05 |
| 7                   | TLR5       | 7100          | A_23_P85903_riset1        | 1.0E-04 |
| 8                   | THC2438936 |               | A_32_P71876_riset1        | 1.0E-04 |
| 9                   | PNOC       | 5368          | A_23_P253321_riset1       | 1.5E-04 |
| 10                  | SLC8A1     | 6546          | A_32_P147078_riset1       | 1.7E-04 |
| 11                  | FCRL2      | 79368         | A_23_P160751_riset1       | 1.7E-04 |
| 12                  | BLK        | 640           | BLK_riset2                | 2.7E-04 |
| 13                  | PCDH9      | 5101          | A_24_P187218_riset1       | 2.8E-04 |
| 14                  | CD200      | 4345          | A_23_P121480_riset1       | 3.3E-04 |
| 15                  | THC2317432 |               | A_32_P124728_riset1       | 3.3E-04 |
| 16                  | BCL11A     | 53335         | A_24_P402588_riset1       | 3.5E-04 |
| 17                  | TSPAN3     | 10099         | A_23_P14804_riset1        | 4.5E-04 |
| 18                  | CD79A      | 973           | CD79A_riset2_piqor        | 5.0E-04 |
| 19                  | CASP5      | 838           | CASP5_riset2              | 5.1E-04 |
| 20                  | FCRL5      | 83416         | A_23_P201211_riset1       | 5.4E-04 |
| 21                  | IL1RL2     | 8808          | A_23_P56604_riset1        | 6.1E-04 |
| 22                  | EBI2       | 1880          | A_23_P25566_riset1        | 6.6E-04 |
| 23                  | BLNK       | 29760         | A_24_P64344_riset1        | 6.6E-04 |
| 24                  | THC2340114 |               | A_32_P192834_riset1       | 6.8E-04 |
| 25                  | RNF24      | 11237         | A_23_P120533_riset1       | 6.8E-04 |

|    |          |        |                           |         |
|----|----------|--------|---------------------------|---------|
| 26 | DIMT1L   | 27292  | A_23_P58529_riset1        | 7.0E-04 |
| 27 | EPO      | 2056   | A_23_P145664_riset1       | 7.0E-04 |
| 28 | ZAK      | 51776  | A_23_P318300_riset1       | 7.1E-04 |
| 29 | CD40     | 958    | A_23_P57036_riset1        | 7.5E-04 |
| 30 | CREB3L4  | 148327 | A_23_P63232_riset1        | 7.6E-04 |
| 31 | IGHM     |        | A_24_P417352_riset1       | 7.8E-04 |
| 32 | ADAM17   | 6868   | A_32_P129621_riset1       | 8.0E-04 |
| 33 | SH2D1B   | 117157 | A_32_P324533_riset1       | 8.3E-04 |
| 34 | AKR1C3   | 8644   | A_23_P138543_riset1       | 8.4E-04 |
| 35 | CASD1    | 64921  | A_24_P69379_riset1        | 8.6E-04 |
| 36 | FCRLA    | 84824  | A_23_P46037_riset1        | 9.0E-04 |
| 37 | BTLA     | 151888 | MIL_PPPID399200354_riset1 | 9.4E-04 |
| 38 | COL4A3BP | 10087  | A_23_P61748_riset1        | 9.7E-04 |
| 39 | CLCN5    | 1184   | CLCN5_riset2              | 9.8E-04 |
| 40 | LHFPL2   | 10184  | A_23_P255104_riset1       | 9.9E-04 |
| 41 | ARG1     | 383    | A_23_P111321_riset1       | 1.0E-03 |
| 42 | ANXA3    | 306    | A_23_P121716_riset1       | 1.0E-03 |
| 43 | HLA-DOA  | 3111   | A_32_P356316_riset1       | 1.1E-03 |
| 44 | KLRF1    | 51348  | A_32_P158966_riset1       | 1.1E-03 |
| 45 | CD22     | 933    | CD22_riset2               | 1.2E-03 |
| 46 | TLR2     | 7097   | A_23_P92499_riset1        | 1.2E-03 |
| 47 | PLXDC2   | 84898  | A_32_P187518_rev_riset1   | 1.3E-03 |
| 48 | BCL7A    | 605    | A_24_P203056_riset1       | 1.4E-03 |
| 49 | VMO1     | 284013 | A_23_P55356_riset1        | 1.4E-03 |
| 50 | ADAMTS4  | 9507   | A_23_P360754_riset1       | 1.4E-03 |
| 51 | PTPRJ    | 5795   | A_24_P921321_riset1       | 1.5E-03 |
| 52 | IFNAR1   | 3454   | MIL_PPPID397416299_riset1 | 1.5E-03 |
| 53 | MAGEA10  | 4109   | A_32_P17253_riset1        | 1.5E-03 |
| 54 | HLA-DOB  | 3112   | A_23_P30736_riset1        | 1.5E-03 |
| 55 | CD163    | 9332   | A_23_P33723_riset1        | 1.6E-03 |
| 56 | FLJ32866 |        | MIL_PPPID400032869_riset1 | 1.6E-03 |
| 57 | EBF1     | 1879   | A_24_P156501_riset1       | 1.7E-03 |
| 58 | GPR92    | 57121  | A_23_P204375_riset1       | 1.7E-03 |
| 59 | COX11    | 1353   | A_24_P404204_riset1       | 1.7E-03 |
| 60 | PEX3     | 8504   | A_23_P259328_riset1       | 1.7E-03 |

|    |           |        |                           |         |
|----|-----------|--------|---------------------------|---------|
| 61 | ACVR1     | 90     | A_23_P79218_riset1        | 1.7E-03 |
| 62 | CD83      | 9308   | A_23_P70670_riset1        | 1.8E-03 |
| 63 | GPR120    | 338557 | A_24_P129588_riset1       | 1.9E-03 |
| 64 | FLJ23356  | 84197  | A_23_P83835_riset1        | 2.0E-03 |
| 65 | FAM129A   | 116496 | A_24_P233786_riset1       | 2.1E-03 |
| 66 | ASPH      | 444    | A_24_P295245_riset1       | 2.1E-03 |
| 67 | MCTP1     | 79772  | A_24_P212481_riset1       | 2.2E-03 |
| 68 | SORT1     | 6272   | A_24_P325520_riset1       | 2.2E-03 |
| 69 | F8        | 2157   | A_24_P314451_riset1       | 2.2E-03 |
| 70 | TMEM49    | 81671  | A_32_P9753_riset1         | 2.4E-03 |
| 71 | MBOAT2    | 129642 | A_23_P370635_riset1       | 2.4E-03 |
| 72 | SORL1     | 6653   | A_23_P87049_riset1        | 2.4E-03 |
| 73 | IQGAP1    | 8826   | A_24_P321919_riset1       | 2.5E-03 |
| 74 | CLEC6A    | 93978  | MIL_PPPID394307776_riset1 | 2.6E-03 |
| 75 | SIRPA     | 140885 | A_24_P267619_riset1       | 2.6E-03 |
| 76 | PDHX      | 8050   | A_23_P36266_riset1        | 2.7E-03 |
| 77 | STAT3     | 6774   | A_23_P100790_riset1       | 2.7E-03 |
| 78 | SLPI      | 6590   | A_23_P91230_riset1        | 2.7E-03 |
| 79 | NTHL1     | 4913   | A_23_P88904_riset1        | 2.8E-03 |
| 80 | CXCL5     | 6374   | A_24_P277367_riset1       | 2.8E-03 |
| 81 | RET       | 5979   | MIL_PPPID397416187_riset1 | 2.9E-03 |
| 82 | GPR84     | 53831  | A_23_P25155_riset1        | 3.0E-03 |
| 83 | ITK       | 3702   | ITK_riset2                | 3.0E-03 |
| 84 | AIM2      | 9447   | A_32_P44394_riset1        | 3.1E-03 |
| 85 | NCOA1     | 8648   | NCOA1_riset2_piqor        | 3.2E-03 |
| 86 | LOC145474 | 145474 | A_32_P393377_riset1       | 3.2E-03 |
| 87 | TNFAIP8   | 25816  | TNFAIP8_riset2            | 3.3E-03 |
| 88 | ENOX2     | 10495  | MIL_PPPID394307984_riset1 | 3.3E-03 |
| 89 | FSTL3     | 10272  | A_23_P209167_riset1       | 3.3E-03 |
| 90 | FAM13A1   | 10144  | A_23_P370651_riset1       | 3.4E-03 |
| 91 | KCNJ2     | 3759   | A_23_P329261_riset1       | 3.4E-03 |
| 92 | BNIP3     | 664    | A_23_P138635_riset1       | 3.4E-03 |
| 93 | GALNT14   | 79623  | A_23_P67847_riset1        | 3.4E-03 |
| 94 | TGDS      | 23483  | A_23_P65217_riset1        | 3.5E-03 |
| 95 | VSIG2     | 23584  | A_23_P36018_riset1        | 3.5E-03 |

|     |              |        |                           |         |
|-----|--------------|--------|---------------------------|---------|
| 96  | DNAJC19      | 131118 | A_23_P121396_riset1       | 3.5E-03 |
| 97  | A_23_P126328 |        | A_23_P126328_riset1       | 3.5E-03 |
| 98  | PPL          | 5493   | A_23_P106901_riset1       | 3.5E-03 |
| 99  | WASF3        | 10810  | A_24_P176079_riset1       | 3.6E-03 |
| 100 | THC2380706   |        | A_24_P214556_riset1       | 3.6E-03 |
| 101 | C1ORF19      | 116461 | A_23_P104022_riset1       | 3.7E-03 |
| 102 | SERPINH1     | 871    | A_23_P75998_riset1        | 3.8E-03 |
| 103 | LITAF        | 9516   | A_23_P3532_riset1         | 3.9E-03 |
| 104 | FLJ37035     | 645524 | A_24_P59471_riset1        | 3.9E-03 |
| 105 | FGF7         | 2252   | A_32_P196029_riset1       | 4.0E-03 |
| 106 | SLC25A37     | 51312  | A_32_P197026_riset1       | 4.1E-03 |
| 107 | IGF1R        | 3480   | A_23_P417282_riset1       | 4.3E-03 |
| 108 | EDG1         | 1901   | A_23_P160117_riset1       | 4.4E-03 |
| 109 | NGEF         | 25791  | A_23_P102364_riset1       | 4.4E-03 |
| 110 | TNFAIP6      | 7130   | A_23_P165624_riset1       | 4.4E-03 |
| 111 | RAX          | 30062  | A_23_P89746_riset1        | 4.4E-03 |
| 112 | TMTC3        | 160418 | A_24_P944222_riset1       | 4.4E-03 |
| 113 | MNAT1        | 4331   | A_23_P32615_riset1        | 4.4E-03 |
| 114 | ZNF181       | 339318 | A_23_P50735_riset1        | 4.4E-03 |
| 115 | MYC          | 4609   | MIL_PPPID404158649_riset2 | 4.5E-03 |
| 116 | CLEC5A       | 23601  | A_23_P71165_riset1        | 4.5E-03 |
| 117 | GPX7         | 2882   | A_23_P73972_riset1        | 4.6E-03 |
| 118 | HPN          | 3249   | A_23_P101801_riset1       | 4.6E-03 |
| 119 | PPIL3        | 53938  | A_23_P28213_riset1        | 4.6E-03 |
| 120 | THUMPD1      | 55623  | A_24_P90878_riset1        | 4.7E-03 |
| 121 | MAD2L1       | 4085   | A_23_P92441_riset1        | 4.7E-03 |
| 122 | SPTLC2       | 9517   | A_24_P150486_riset1       | 4.7E-03 |
| 123 | THAP2        | 83591  | A_24_P350437_riset1       | 4.7E-03 |
| 124 | CRYAB        | 1410   | A_24_P206776_riset1       | 4.9E-03 |
| 125 | C8ORF60      | 619426 | A_24_P59387_riset1        | 4.9E-03 |
| 126 | MXD1         | 4084   | A_23_P408094_riset1       | 4.9E-03 |
| 127 | MATK         | 4145   | A_23_P50678_riset1        | 4.9E-03 |
| 128 | LYN          | 4067   | A_23_P147431_riset1       | 5.0E-03 |
| 129 | LGALS2       | 3957   | LGALS2_riset2             | 5.0E-03 |
| 130 | SEPT09       | 6414   | A_32_P344025_riset1       | 5.0E-03 |

|     |           |        |                           |         |
|-----|-----------|--------|---------------------------|---------|
| 131 | PDCD6     | 10016  | A_23_P218997_riset1       | 5.1E-03 |
| 132 | DCLRE1A   | 9937   | A_23_P75038_riset1        | 5.2E-03 |
| 133 | IL10RA    | 3587   | A_24_P107303_riset1       | 5.3E-03 |
| 134 | MAGEH1    | 28986  | A_23_P34144_riset1        | 5.5E-03 |
| 135 | LOC550643 | 550643 | A_24_P867868_riset1       | 5.6E-03 |
| 136 | SLC25A37  | 51312  | A_32_P197026_riset1       | 5.6E-03 |
| 137 | CARD6     | 84674  | A_23_P41854_riset1        | 5.6E-03 |
| 138 | ZFP2      | 80108  | A_23_P133359_riset1       | 5.6E-03 |
| 139 | PTMA      | 5757   | A_32_P746413_riset1       | 5.6E-03 |
| 140 | BACE2     | 25825  | A_23_P154875_riset1       | 5.7E-03 |
| 141 | CHST2     | 9435   | CHST2_riset2_piqor        | 5.8E-03 |
| 142 | MUC5AC    | 4586   | MIL_PPPID404158966_riset2 | 5.8E-03 |
| 143 | BCKDHB    | 594    | A_24_P239664_riset1       | 5.8E-03 |
| 144 | MTX2      | 10651  | A_23_P120335_riset1       | 5.8E-03 |
| 145 | QSOX1     | 5768   | QSOX1_riset2              | 5.9E-03 |
| 146 | PKM2      | 5315   | A_23_P399501_riset1       | 5.9E-03 |
| 147 | ITGB1BP1  | 9270   | A_23_P154507_riset1       | 6.0E-03 |
| 148 | CD7       | 924    | A_23_P118862_riset1       | 6.0E-03 |
| 149 | ACOT2     | 10965  | A_23_P3111_riset1         | 6.0E-03 |
| 150 | SEPT03    | 6414   | A_32_P344025_riset1       | 6.0E-03 |
| 151 | RTN3      | 10313  | A_23_P76682_riset1        | 6.1E-03 |
| 152 | FKBP5     | 2289   | A_24_P38081_riset1        | 6.1E-03 |
| 153 | CD40LG    | 959    | A_23_P62220_riset1        | 6.1E-03 |
| 154 | AIM1      | 202    | A_23_P70785_riset1        | 6.1E-03 |
| 155 | FANK1     | 92565  | A_23_P115785_riset1       | 6.1E-03 |
| 156 | DNMT1     | 1786   | A_23_P27490_riset1        | 6.2E-03 |
| 157 | AK3L1     | 205    | MIL_PPPID394453462_riset1 | 6.2E-03 |
| 158 | RFC4      | 5984   | A_23_P18196_riset1        | 6.2E-03 |
| 159 | BTG1      | 694    | A_23_P87560_riset1        | 6.3E-03 |
| 160 | SPON1     | 10418  | A_32_P133072_riset1       | 6.3E-03 |
| 161 | KCNJ15    | 3772   | A_23_P17655_riset1        | 6.3E-03 |
| 162 | ATL3      | 25923  | A_23_P105028_riset1       | 6.3E-03 |
| 163 | APH1B     | 83464  | A_23_P205997_riset1       | 6.3E-03 |
| 164 | LRRC18    | 474354 | A_24_P321125_riset1       | 6.3E-03 |

|     |              |               |                           |         |
|-----|--------------|---------------|---------------------------|---------|
| 165 | AFF3         | 3899          | A_23_P373464_riset1       | 6.4E-03 |
| 166 | MCEE         | 84693         | A_23_P56654_riset1        | 6.4E-03 |
| 167 | NLRC4        | 58484         | A_23_P119835_riset1       | 6.4E-03 |
| 168 | PLA1A        | 51365         | A_23_P29816_riset1        | 6.4E-03 |
| 169 | DTX1         | 1840          | A_24_P290751_riset1       | 6.5E-03 |
| 170 | TRIM4        | 89122         | A_23_P500601_riset1       | 6.5E-03 |
| 171 | TMEM106B     | 54664         | A_32_P353072_riset1       | 6.6E-03 |
| 172 | CCNG1        | 900           | A_23_P58606_riset1        | 6.6E-03 |
| 173 | HP           | 3240          | MIL_PPPID399806176_riset1 | 6.7E-03 |
| 174 | TXNDC13      | 56255         | A_23_P166100_riset1       | 6.7E-03 |
| 175 | OR2M1P;OR2M2 | 388762;391194 | A_32_P310503_riset1       | 6.8E-03 |
| 176 | FCAR         | 2204          | A_24_P348265_riset1       | 6.8E-03 |
| 177 | BTG2         | 7832          | A_23_P62901_riset1        | 6.9E-03 |
| 178 | VCPIP1       | 80124         | A_32_P74366_riset1        | 7.0E-03 |
| 179 | SATB1        | 6304          | SATB1_riset2              | 7.0E-03 |
| 180 | PAK1         | 5058          | MIL_PPPID397416203_riset1 | 7.1E-03 |
| 181 | PDLIM7       | 9260          | A_24_P41882_riset1        | 7.1E-03 |
| 182 | NOTCH2       | 4853          | A_23_P200792_riset1       | 7.1E-03 |
| 183 | A_24_P706752 |               | A_24_P648391_riset1       | 7.1E-03 |
| 184 | IL23A        | 51561         | A_23_P76078_riset1        | 7.2E-03 |
| 185 | DDEF1        | 50807         | A_23_P71526_riset1        | 7.2E-03 |
| 186 | GPRC5B       | 51704         | A_23_P324327_riset1       | 7.3E-03 |
| 187 | XBP1         | 7494          | A_23_P120845_riset1       | 7.3E-03 |
| 188 | SOCS3        | 9021          | A_23_P207058_riset1       | 7.3E-03 |
| 189 | SFRS10       | 6434          | A_24_P145911_riset1       | 7.3E-03 |
| 190 | TNFSF10      | 8743          | A_23_P121253_riset1       | 7.3E-03 |
| 191 | B3GALT6      | 126792        | A_23_P35021_riset1        | 7.3E-03 |
| 192 | AQP9         | 366           | A_23_P106362_riset1       | 7.3E-03 |
| 193 | ZNF655       | 79027         | A_23_P345081_riset1       | 7.4E-03 |
| 194 | UPB1         | 51733         | A_23_P120822_riset1       | 7.5E-03 |
| 195 | RNASE2       | 6036          | A_23_P151638_riset1       | 7.5E-03 |
| 196 | MAP2K6       | 5608          | A_23_P207445_riset1       | 7.5E-03 |
| 197 | CHST2        | 9435          | CHST2_riset2_piqor        | 7.6E-03 |
| 198 | LYRM7        | 90624         | A_32_P18159_riset1        | 7.6E-03 |



|     |             |            |                           |         |
|-----|-------------|------------|---------------------------|---------|
| 199 | AK124263    |            | A_24_P538708_riset1       | 7.6E-03 |
| 200 | MYT1;PCMTD2 | 4661;55251 | A_23_P210829_riset1       | 7.6E-03 |
| 201 | CD96        | 10225      | A_23_P44154_riset1        | 7.7E-03 |
| 202 | IRF2        | 3660       | A_23_P136478_riset1       | 7.7E-03 |
| 203 | PCGF6       | 84108      | A_23_P115703_riset1       | 7.7E-03 |
| 204 | IGKV3-20    | 28912      | A_23_P21800_riset1        | 7.7E-03 |
| 205 | CARD11      | 84433      | A_23_P82324_riset1        | 7.8E-03 |
| 206 | IFT80       | 57560      | A_23_P316150_riset1       | 7.8E-03 |
| 207 | SLAMF1      | 6504       | SLAMF1_riset2             | 7.9E-03 |
| 208 | SIP1        | 8487       | A_23_P88194_riset1        | 8.0E-03 |
| 209 | FAIM        | 55179      | A_23_P253932_riset1       | 8.0E-03 |
| 210 | NEK1        | 4750       | A_23_P124427_riset1       | 8.0E-03 |
| 211 | IL1R2       | 7850       | A_23_P79398_riset1        | 8.0E-03 |
| 212 | HOXB2       | 3212       | A_23_P107283_riset1       | 8.1E-03 |
| 213 | VCAN        | 1462       | VCAN_riset2               | 8.2E-03 |
| 214 | FLT3        | 2322       | MIL_PPPID394308044_riset1 | 8.2E-03 |
| 215 | CD55        | 1604       | A_23_P374862_riset1       | 8.2E-03 |
| 216 | SLC26A8     | 116369     | A_23_P30950_riset1        | 8.2E-03 |
| 217 | PDLIM1      | 9124       | A_23_P149992_riset1       | 8.3E-03 |
| 218 | ZMYM1       | 79830      | A_24_P53985_riset1        | 8.3E-03 |
| 219 | FCGR1A      | 2209       | A_23_P63395_riset1        | 8.3E-03 |
| 220 | LGALS8      | 3964       | LGALS8_riset2             | 8.3E-03 |
| 221 | MRPS30      | 10884      | A_23_P252362_riset1       | 8.4E-03 |
| 222 | CLIC3       | 9022       | A_23_P254654_riset1       | 8.4E-03 |
| 223 | BEX4        | 56271      | A_23_P114391_riset1       | 8.4E-03 |
| 224 | SLC11A1     | 6556       | A_32_P436132_riset1       | 8.4E-03 |
| 225 | BMP2K       | 55589      | A_24_P86240_riset1        | 8.4E-03 |
| 226 | SFT2D3      | 84826      | A_23_P5566_riset1         | 8.4E-03 |
| 227 | C5ORF28     | 64417      | A_23_P121875_riset1       | 8.5E-03 |
| 228 | STX11       | 8676       | A_23_P156788_riset1       | 8.5E-03 |

|     |              |           |                           |         |
|-----|--------------|-----------|---------------------------|---------|
| 229 | ITGA1        | 3672      | A_23_P256332_riset1       | 8.6E-03 |
| 230 | PHLDB2       | 90102     | A_24_P240166_riset1       | 8.6E-03 |
| 231 | A_23_P399604 |           | A_23_P399604_riset1       | 8.7E-03 |
| 232 | GTL3         | 29105     | A_23_P3514_riset1         | 8.9E-03 |
| 233 | ITSN2        | 50618     | MIL_PPPID399200362_riset1 | 8.9E-03 |
| 234 | ARHGEF12     | 23365     | A_24_P175783_riset1       | 8.9E-03 |
| 235 | LOC100131941 | 100131941 | MIL_PPPID400032845_riset1 | 8.9E-03 |
| 236 | MUC8         | 0         | MUC8_riset2_piqor         | 8.9E-03 |
| 237 | ORM2         | 5005      | A_23_P9485_riset1         | 9.0E-03 |
| 238 | FLJ22662     | 79887     | A_23_P87709_riset1        | 9.1E-03 |
| 239 | APEX1        | 328       | A_23_P151649_riset1       | 9.1E-03 |
| 240 | RPS4Y1       | 6192      | A_23_P259314_riset1       | 9.2E-03 |
| 241 | LCK          | 3932      | LCK_riset2                | 9.3E-03 |
| 242 | LOC642897    | 642897    | A_24_P84401_riset1        | 9.5E-03 |
| 243 | MCL1         | 4170      | A_24_P336754_riset1       | 9.5E-03 |
| 244 | SLC26A8      | 116369    | A_23_P30950_riset1        | 9.5E-03 |
| 245 | PSMB3        | 5691      | PSMB3_riset2_piqor        | 9.5E-03 |
| 246 | CD247        | 919       | A_23_P34676_riset1        | 9.6E-03 |
| 247 | UPF3A        | 65110     | A_32_P202778_riset1       | 9.6E-03 |
| 248 | RGS1         | 5996      | A_23_P97141_riset1        | 9.6E-03 |
| 249 | RBM3         | 5935      | RBM3_riset2               | 9.6E-03 |
| 250 | POLR3H       | 171568    | A_24_P322847_riset1       | 9.8E-03 |
| 251 | RHOH         | 399       | A_23_P58132_riset1        | 9.8E-03 |
| 252 | SELL         | 6402      | A_23_P114921_riset1       | 9.8E-03 |
| 253 | RAC2         | 5880      | A_23_P218774_riset1       | 9.8E-03 |
| 254 | LETMD1       | 25875     | A_23_P117037_riset1       | 9.9E-03 |
| 255 | THC2286599   |           | A_32_P106807_riset1       | 9.9E-03 |
| 256 | PIAS1        | 8554      | PIAS1_riset2_piqor        | 9.9E-03 |
| 257 | LDHB         | 3945      | A_23_P53476_riset1        | 9.9E-03 |
| 258 | CDKN1B       | 1027      | A_23_P204696_riset2       | 1.0E-02 |
| 259 | TRA@         | 6955      | A_23_P258504_riset1       | 1.0E-02 |

|     |     |      |                     |         |
|-----|-----|------|---------------------|---------|
| 260 | NRL | 4901 | A_23_P337746_riset1 | 1.0E-02 |
|-----|-----|------|---------------------|---------|

**Supplemental Table 3B. List of probes within the *training* and *test sets* with significant differential expression identified by four-class analysis of microarray data.**

Complete list of 260 probes within (A) *training set* and 1378 probes within (B) *test set* with significant differential expression identified following four-class analysis, listed in order of ranked significance, with corresponding microarray probe ID and EntrezGene ID (where assigned). Probes were ranked on p values by Kruskal-Wallis test with adjustment for False Discovery Rate (FDR) at 1%.

| <i>Test set</i> |              |               |                           |          |
|-----------------|--------------|---------------|---------------------------|----------|
| Rank            | Gene Name    | EntrezGene ID | Probe ID                  | <i>P</i> |
| 1               | TCL1A        | 8115          | A_23_P357717_riset1       | 6.09E-10 |
| 2               | TCL1A        | 8115          | MIL_PPPID394307780_riset1 | 6.09E-10 |
| 3               | HS3ST1       | 9957          | A_23_P121657_riset1       | 1.45E-09 |
| 4               | CD200        | 4345          | A_23_P121480_riset1       | 3.42E-09 |
| 5               | ADAMTS4      | 9507          | A_23_P360754_riset1       | 1.84E-08 |
| 6               | CTLA4        | 1493          | A_23_P102481_riset1       | 6.14E-08 |
| 7               | GPR44        | 11251         | GPR44_riset2              | 7.93E-08 |
| 8               | TBC1D4       | 9882          | A_23_P88095_riset1        | 1.11E-07 |
| 9               | PCDH9        | 5101          | A_24_P187218_riset1       | 1.17E-07 |
| 10              | THC2317432   | -             | A_32_P124728_riset1       | 1.21E-07 |
| 11              | IGKV3-20     | 28912         | A_23_P21800_riset1        | 1.43E-07 |
| 12              | CD79B        | 974           | A_23_P207201_riset1       | 1.51E-07 |
| 13              | IGHM         | 3507          | A_24_P417352_riset1       | 1.54E-07 |
| 14              | MGC29506     | 51237         | A_23_P84596_riset1        | 1.55E-07 |
| 15              | IGKC         | 3514          | MIL_PPPID399806182_riset1 | 1.56E-07 |
| 16              | CD247        | 919           | A_23_P34676_riset1        | 1.64E-07 |
| 17              | BTG1         | 694           | A_23_P87560_riset1        | 1.73E-07 |
| 18              | LOC100132941 | 100132941     | A_24_P144346_riset1       | 1.77E-07 |
| 19              | MCTP1        | 79772         | A_24_P212481_riset1       | 1.79E-07 |
| 20              | BLNK         | 29760         | A_24_P64344_riset1        | 2.11E-07 |
| 21              | LOC652494    | 652494        | A_24_P100684_riset1       | 2.57E-07 |
| 22              | RGS1         | 5996          | A_23_P97141_riset1        | 3.12E-07 |
| 23              | AY062331     | -             | A_24_P639701_riset1       | 3.33E-07 |
| 24              | ICOS         | 29851         | MIL_PPPID399200278_riset1 | 3.39E-07 |

|    |                         |                     |                           |          |
|----|-------------------------|---------------------|---------------------------|----------|
| 25 | CR613436                | -                   | A_32_P27135_riset1        | 3.60E-07 |
| 26 | IGJ                     | 3512                | A_23_P167168_riset1       | 3.85E-07 |
| 27 | BMP2K                   | 55589               | A_24_P86240_riset1        | 4.73E-07 |
| 28 | BTLA                    | 151888              | MIL_PPPID399200354_riset1 | 5.13E-07 |
| 29 | CD79A                   | 973                 | CD79A_riset2_piqor        | 5.47E-07 |
| 30 | OCIAD2                  | 132299              | A_23_P121702_riset1       | 5.53E-07 |
| 31 | FHIT                    | 2272                | FHIT_riset2               | 5.96E-07 |
| 32 | ENST00000359488         | -                   | A_23_P21260_riset1        | 6.17E-07 |
| 33 | IRF8                    | 3394                | A_23_P129636_riset1       | 6.32E-07 |
| 34 | ENST00000360623         | -                   | A_24_P24053_riset1        | 7.85E-07 |
| 35 | RPS6                    | 6194                | A_23_P123563_riset1       | 8.23E-07 |
| 36 | SORT1                   | 6272                | A_24_P325520_riset1       | 8.33E-07 |
| 37 | KIAA0485                |                     | A_24_P762886_riset1       | 8.52E-07 |
| 38 | ASB2                    | 51676               | A_23_P205370_riset1       | 8.58E-07 |
| 39 | RPL9                    | 6133                | A_32_P153100_riset1       | 8.58E-07 |
| 40 | BBS4                    | 585                 | A_23_P99967_riset1        | 8.63E-07 |
| 41 | EIF2AK3                 | 9451                | A_23_P135857_riset1       | 8.74E-07 |
| 42 | CD48                    | 962                 | A_23_P74145_riset1        | 9.45E-07 |
| 43 | FCRL2                   | 79368               | A_23_P160751_riset1       | 9.83E-07 |
| 44 | DENND2D                 | 79961               | A_23_P85952_riset1        | 9.87E-07 |
| 45 | IPLL3                   | 91353               | IPLL3_riset2              | 1.06E-06 |
| 46 | PMP22                   | 5376                | A_23_P100711_riset1       | 1.16E-06 |
| 47 | HINT1                   | 3094                | A_23_P252832_riset1       | 1.25E-06 |
| 48 | FANK1                   | 92565               | A_23_P115785_riset1       | 1.31E-06 |
| 49 | RHOH                    | 399                 | A_23_P58132_riset1        | 1.46E-06 |
| 50 | IGLC                    | 3536                | MIL_PPPID399806199_riset1 | 1.51E-06 |
| 51 | ATL3                    | 25923               | A_23_P105028_riset1       | 1.59E-06 |
| 52 | FCRL1                   | 115350              | A_32_P71876_riset1        | 1.84E-06 |
| 53 | PNOC                    | 5368                | A_23_P253321_riset1       | 1.87E-06 |
| 54 | LOC100131323            | 100131323           | A_24_P93452_riset1        | 2.05E-06 |
| 55 | IGHG1;IGHG2;IGHG3;IGHG4 | 3500;3501;3502;3503 | MIL_PPPID399806233_riset1 | 2.17E-06 |
| 56 | FCRLA                   | 84824               | A_23_P46037_riset1        | 2.18E-06 |
| 57 | MS4A1                   | 931                 | MIL_PPPID394453510_riset1 | 2.21E-06 |

|    |           |        |                         |          |
|----|-----------|--------|-------------------------|----------|
| 58 | TMEM49    | 81671  | A_32_P9753_riset1       | 2.22E-06 |
| 59 | BCL7A     | 605    | A_24_P203056_riset1     | 2.45E-06 |
| 60 | PLXDC2    | 84898  | A_32_P187518_rev_riset1 | 2.47E-06 |
| 61 | CD28      | 940    | A_23_P91095_riset1      | 2.50E-06 |
| 62 | SLAMF1    | 6504   | SLAMF1_riset2           | 2.50E-06 |
| 63 | DNASE1L3  | 1776   | A_23_P257993_riset1     | 2.53E-06 |
| 64 | FN1       | 2335   | A_24_P119745_riset1     | 2.54E-06 |
| 65 | LHFPL2    | 10184  | A_23_P255104_riset1     | 2.79E-06 |
| 66 | SPTLC2    | 9517   | A_24_P150486_riset1     | 2.85E-06 |
| 67 | IKZF2     | 22807  | A_32_P114284_riset1     | 3.13E-06 |
| 68 | DPP4      | 1803   | A_23_P39885_riset1      | 3.17E-06 |
| 69 | KLRB1     | 3820   | A_32_P807121_riset1     | 3.21E-06 |
| 70 | IL2RA     | 3559   | A_23_P127288_riset1     | 3.37E-06 |
| 71 | SPTA1     | 6708   | A_23_P63158_riset1      | 3.47E-06 |
| 72 | AK129547  | -      | A_32_P194372_riset1     | 3.52E-06 |
| 73 | FCER2     | 2208   | A_23_P164773_riset1     | 3.59E-06 |
| 74 | HLA-DOA   | 3111   | A_32_P356316_riset1     | 3.67E-06 |
| 75 | SWAP70    | 23075  | A_23_P116533_riset1     | 3.71E-06 |
| 76 | PLEKHA1   | 59338  | A_23_P115792_riset1     | 3.82E-06 |
| 77 | LDHB      | 3945   | A_23_P53476_riset1      | 3.89E-06 |
| 78 | TGDS      | 23483  | A_23_P65217_riset1      | 3.99E-06 |
| 79 | RPS27     | 6232   | A_23_P74629_riset1      | 4.07E-06 |
| 80 | TSPAN3    | 10099  | A_23_P14804_riset1      | 4.08E-06 |
| 81 | IGLL1     | 3543   | A_24_P83102_riset1      | 4.20E-06 |
| 82 | EBI2      | 1880   | A_23_P25566_riset1      | 4.39E-06 |
| 83 | SORT1     | 6272   | A_24_P325520_riset1     | 4.69E-06 |
| 84 | LAT       | 27040  | A_23_P44105_riset1      | 4.78E-06 |
| 85 | BNIP3     | 664    | A_23_P138635_riset1     | 4.84E-06 |
| 86 | MGC24039  | 160518 | A_23_P379746_riset1     | 4.85E-06 |
| 87 | RFC4      | 5984   | A_23_P18196_riset1      | 5.05E-06 |
| 88 | NEDD4L    | 23327  | A_23_P387856_riset1     | 5.10E-06 |
| 89 | ABLIM1    | 3983   | A_23_P202520_riset1     | 5.11E-06 |
| 90 | QRSL1     | 55278  | A_24_P63799_riset1      | 5.45E-06 |
| 91 | MAOA      | 4128   | A_23_P96410_riset1      | 5.65E-06 |
| 92 | LOC643837 | 643837 | A_32_P196036_riset1     | 5.70E-06 |

|     |            |        |                     |          |
|-----|------------|--------|---------------------|----------|
| 93  | TNCRNA     | 283131 | A_32_P1036_riset1   | 5.91E-06 |
| 94  | MAPK14     | 1432   | MAPK14_1_riset2     | 6.02E-06 |
| 95  | CCR7       | 1236   | A_23_P343398_riset1 | 6.50E-06 |
| 96  | LOC729349  | 729141 | A_24_P161233_riset1 | 6.64E-06 |
| 97  | TLR5       | 7100   | A_23_P85903_riset1  | 6.68E-06 |
| 98  | MAGEH1     | 28986  | A_23_P34144_riset1  | 6.78E-06 |
| 99  | ITK        | 3702   | ITK_riset2          | 6.93E-06 |
| 100 | GADD45A    | 1647   | A_23_P23221_riset1  | 7.11E-06 |
| 101 | FZD5       | 7855   | A_24_P148503_riset1 | 7.35E-06 |
| 102 | EBF1       | 1879   | A_24_P156501_riset1 | 7.39E-06 |
| 103 | SPON1      | 10418  | A_32_P133072_riset1 | 7.60E-06 |
| 104 | RPS21      | 6227   | A_23_P120660_riset1 | 7.61E-06 |
| 105 | EBF1       | 1879   | A_24_P156501_riset1 | 8.13E-06 |
| 106 | AKR1C3     | 8644   | A_23_P138543_riset1 | 8.53E-06 |
| 107 | OLIG2      | 10215  | A_23_P211079_riset1 | 8.60E-06 |
| 108 | RPA3       | 6119   | A_23_P256455_riset1 | 8.61E-06 |
| 109 | EDG1       | 1901   | A_23_P160117_riset1 | 9.65E-06 |
| 110 | MBOAT2     | 129642 | A_23_P370635_riset1 | 9.71E-06 |
| 111 | BLK        | 640    | BLK_riset2          | 9.78E-06 |
| 112 | KCNJ2      | 3759   | A_23_P329261_riset1 | 1.01E-05 |
| 113 | FOXO3      | 2309   | A_32_P493575_riset1 | 1.03E-05 |
| 114 | HSF2       | 3298   | A_32_P9963_riset1   | 1.04E-05 |
| 115 | DTX1       | 1840   | A_24_P290751_riset1 | 1.08E-05 |
| 116 | RPL30      | 6156   | A_24_P29818_riset1  | 1.09E-05 |
| 117 | IL12RB2    | 3595   | IL12RB2_riset2      | 1.09E-05 |
| 118 | FLJ36644   | 400617 | A_32_P102966_riset1 | 1.14E-05 |
| 119 | SLC25A37   | 51312  | A_32_P197026_riset1 | 1.21E-05 |
| 120 | CD19       | 930    | CD19_riset2         | 1.26E-05 |
| 121 | CD22       | 933    | CD22_riset2         | 1.26E-05 |
| 122 | EP400      | 57634  | A_23_P253154_riset1 | 1.26E-05 |
| 123 | CD83       | 9308   | A_23_P70670_riset1  | 1.31E-05 |
| 124 | IRAK3      | 11213  | IRAK3_riset2        | 1.34E-05 |
| 125 | GPR84      | 53831  | A_23_P25155_riset1  | 1.39E-05 |
| 126 | GATM       | 2628   | A_23_P129064_riset1 | 1.41E-05 |
| 127 | THC2280867 | -      | A_32_P122715_riset1 | 1.45E-05 |

|     |                            |                    |                           |          |
|-----|----------------------------|--------------------|---------------------------|----------|
| 128 | HLA-DOB                    | 3112               | A_23_P30736_riset1        | 1.49E-05 |
| 129 | ABCD1                      | 215                | A_23_P148556_riset1       | 1.51E-05 |
| 130 | UVRAG                      | 7405               | UVRAG_riset2              | 1.54E-05 |
| 131 | PPIL3                      | 53938              | A_23_P28213_riset1        | 1.54E-05 |
| 132 | TNFAIP8                    | 25816              | TNFAIP8_riset2            | 1.54E-05 |
| 133 | OLFM4                      | 10562              | A_24_P181254_riset1       | 1.55E-05 |
| 134 | BAG1                       | 573                | BAG1_riset2_piqor         | 1.55E-05 |
| 135 | CXORF21                    | 80231              | A_23_P62227_riset1        | 1.66E-05 |
| 136 | PIK3IP1                    | 113791             | A_24_P134488_riset1       | 1.66E-05 |
| 137 | LETMD1                     | 25875              | A_23_P117037_riset1       | 1.68E-05 |
| 138 | ZBED5                      | 58486              | A_23_P98483_riset1        | 1.69E-05 |
| 139 | TIMP2;LOC732206            | 7077               | MIL_PPPID397416231_riset1 | 1.69E-05 |
| 140 | EEF1A1;EEF1AL7             | 1915;441032        | MIL_PPPID399806198_riset1 | 1.71E-05 |
| 141 | NUBPL                      | 80224              | A_23_P170906_riset1       | 1.72E-05 |
| 142 | HOXB2                      | 3212               | A_23_P107283_riset1       | 1.73E-05 |
| 143 | PTPRF                      | 5792               | A_32_P416233_riset1       | 1.90E-05 |
| 144 | NELL2                      | 4753               | A_23_P10025_riset1        | 2.00E-05 |
| 145 | LCN2                       | 3934               | A_23_P169437_riset1       | 2.04E-05 |
| 146 | TCF4                       | 6925               | TCF4_riset2               | 2.04E-05 |
| 147 | MARCKSL1                   | 65108              | A_23_P310_riset1          | 2.12E-05 |
| 148 | PSMA1                      | 5682               | MIL_PPPID402610840_riset2 | 2.12E-05 |
| 149 | TCF7                       | 6932               | A_23_P7582_riset1         | 2.22E-05 |
| 150 | HLX                        | 3142               | A_23_P126263_riset1       | 2.35E-05 |
| 151 | EGR1                       | 1958               | A_23_P214080_riset1       | 2.38E-05 |
| 152 | IL23A                      | 51561              | A_23_P76078_riset1        | 2.41E-05 |
| 153 | AF471475                   | -                  | A_23_P259763_riset1       | 2.55E-05 |
| 154 | CCR4                       | 1233               | A_23_P72989_riset1        | 2.58E-05 |
| 155 | HNRPH1                     | 3187               | A_24_P320254_riset1       | 2.60E-05 |
| 156 | HCG_1984468;LOC388524;RPSA | 388524;389672;3921 | MIL_PPPID399806188_riset1 | 2.69E-05 |
| 157 | MT1E                       | 4493               | MIL_PPPID399806219_riset1 | 2.76E-05 |
| 158 | CCL23                      | 6368               | A_24_P133905_riset1       | 2.78E-05 |
| 159 | PSCD1                      | 9267               | A_23_P83781_riset1        | 2.80E-05 |
| 160 | CTSD                       | 1509               | A_23_P52556_riset1        | 2.84E-05 |



|     |                                                   |        |                           |          |
|-----|---------------------------------------------------|--------|---------------------------|----------|
| 161 | SLC26A8                                           | 116369 | A_23_P30950_riset1        | 2.86E-05 |
| 162 | PDLIM7                                            | 9260   | A_24_P41882_riset1        | 2.88E-05 |
| 163 | CASD1                                             | 64921  | A_24_P69379_riset1        | 2.89E-05 |
| 164 | BEX5                                              | 340542 | A_32_P69849_riset1        | 2.94E-05 |
| 165 | ENST0000032<br>2032                               | -      | A_23_P61042_riset1        | 2.95E-05 |
| 166 | SLC29A1                                           | 2030   | A_23_P133694_riset1       | 2.98E-05 |
| 167 | HSPE1                                             | 3336   | A_23_P56922_riset1        | 3.00E-05 |
| 168 | KLRB1                                             | 3820   | A_32_P807121_riset1       | 3.04E-05 |
| 169 | SLC41A1                                           | 254428 | A_24_P122732_riset1       | 3.12E-05 |
| 170 | FZD5                                              | 7855   | A_24_P148503_riset1       | 3.46E-05 |
| 171 | AK094477                                          | -      | A_24_P213622_riset1       | 3.46E-05 |
| 172 | ETAA1                                             | 54465  | A_23_P51117_riset1        | 3.56E-05 |
| 173 | CA433167                                          | -      | A_32_P101002_riset1       | 3.64E-05 |
| 174 | STAG3                                             | 10734  | A_23_P145657_riset1       | 3.66E-05 |
| 175 | C6ORF105                                          | 84830  | A_23_P156826_riset1       | 3.76E-05 |
| 176 | BEX4                                              | 56271  | A_23_P114391_riset1       | 3.84E-05 |
| 177 | PPWD1                                             | 23398  | A_23_P110433_riset1       | 3.93E-05 |
| 178 | RNASE2                                            | 6036   | A_23_P151638_riset1       | 4.22E-05 |
| 179 | INHBA                                             | 3624   | A_23_P122924_riset1       | 4.32E-05 |
| 180 | SPRY1                                             | 10252  | A_23_P144476_riset1       | 4.48E-05 |
| 181 | THC2349739                                        | -      | A_32_P26422_riset1        | 4.55E-05 |
| 182 | RECK                                              | 8434   | A_23_P83028_riset1        | 4.56E-05 |
| 183 | ARID5B                                            | 84159  | A_32_P18440_riset1        | 4.82E-05 |
| 184 | RPS27A                                            | 6233   | MIL_PPPID397416175_riset1 | 4.96E-05 |
| 185 | ATXN3                                             | 4287   | A_23_P129031_riset1       | 4.96E-05 |
| 186 | ELA2                                              | 1991   | A_23_P130961_riset1       | 5.10E-05 |
| 187 | DENND1A                                           | 57706  | A_32_P23854_riset1        | 5.12E-05 |
| 188 | CELSR1                                            | 9620   | A_32_P157471_rev_riset1   | 5.13E-05 |
| 189 | DDC                                               | 1644   | A_23_P145644_riset1       | 5.18E-05 |
| 190 | RPL35;LOC3<br>90876;LOC44<br>0737;HCG_19<br>83332 | 390876 | A_24_P187023_riset1       | 5.20E-05 |
| 191 | MAN1A1                                            | 4121   | A_23_P156425_riset1       | 5.31E-05 |
| 192 | COL17A1                                           | 1308   | A_23_P52323_riset1        | 5.31E-05 |
| 193 | HSPA8                                             | 3312   | A_32_P13728_riset1        | 5.31E-05 |

|     |                                                                                                                                                                          |                                                                                                                        |                     |          |
|-----|--------------------------------------------------------------------------------------------------------------------------------------------------------------------------|------------------------------------------------------------------------------------------------------------------------|---------------------|----------|
| 194 | CXCL9                                                                                                                                                                    | 4283                                                                                                                   | CXCL9_riset2_piqor  | 5.37E-05 |
| 195 | FADS3                                                                                                                                                                    | 3995                                                                                                                   | A_23_P64399_riset1  | 5.38E-05 |
| 196 | PDHX                                                                                                                                                                     | 8050                                                                                                                   | A_23_P36266_riset1  | 5.40E-05 |
| 197 | C12ORF57                                                                                                                                                                 | 113246                                                                                                                 | A_23_P350551_riset1 | 5.64E-05 |
| 198 | NFAM1                                                                                                                                                                    | 150372                                                                                                                 | A_23_P17911_riset1  | 5.69E-05 |
| 199 | OXCT1                                                                                                                                                                    | 5019                                                                                                                   | A_32_P63848_riset1  | 5.71E-05 |
| 200 | F7                                                                                                                                                                       | 2155                                                                                                                   | A_32_P719148_riset1 | 5.97E-05 |
| 201 | HRH4                                                                                                                                                                     | 59340                                                                                                                  | A_23_P386310_riset1 | 5.98E-05 |
| 202 | TNKS                                                                                                                                                                     | 8658                                                                                                                   | A_32_P144596_riset1 | 5.99E-05 |
| 203 | CD52                                                                                                                                                                     | 1043                                                                                                                   | A_23_P85800_riset1  | 6.02E-05 |
| 204 | CD2                                                                                                                                                                      | 914                                                                                                                    | A_23_P161076_riset1 | 6.05E-05 |
| 205 | CD40                                                                                                                                                                     | 958                                                                                                                    | A_23_P57036_riset1  | 6.10E-05 |
| 206 | TCF3                                                                                                                                                                     | 6929                                                                                                                   | A_24_P365365_riset1 | 6.10E-05 |
| 207 | LCK                                                                                                                                                                      | 3932                                                                                                                   | LCK_riset2          | 6.13E-05 |
| 208 | PFKFB3                                                                                                                                                                   | 5209                                                                                                                   | A_24_P261259_riset1 | 6.32E-05 |
| 209 | SFRS10                                                                                                                                                                   | 6434                                                                                                                   | A_24_P145911_riset1 | 6.37E-05 |
| 210 | NMD3                                                                                                                                                                     | 51068                                                                                                                  | A_23_P32861_riset1  | 6.46E-05 |
| 211 | MEFV                                                                                                                                                                     | 4210                                                                                                                   | A_23_P140967_riset1 | 6.48E-05 |
| 212 | LIMA1                                                                                                                                                                    | 51474                                                                                                                  | A_23_P151267_riset1 | 6.56E-05 |
| 213 | GZMK                                                                                                                                                                     | 3003                                                                                                                   | A_23_P156216_riset1 | 6.61E-05 |
| 214 | ASPH                                                                                                                                                                     | 444                                                                                                                    | A_24_P295245_riset1 | 6.61E-05 |
| 215 | MS4A6A                                                                                                                                                                   | 64231                                                                                                                  | A_23_P203376_riset1 | 6.85E-05 |
| 216 | FLJ14186;LOC388312;LOC388572;LOC441124;LOC642788;LOC646301;LOC646434;LOC653056;LOC728100;LOC728417;LOC728728;LOC728790;LOC729021;LOC729028;LOC729737;LOC730953;LOC731275 | 388312;388572;401149;441124;642788;646301;646434;653056;728100;728417;728728;728790;729021;729028;729737;730953;731275 | A_32_P28158_riset1  | 6.90E-05 |
| 217 | CCDC18                                                                                                                                                                   | 343099                                                                                                                 | A_23_P51805_riset1  | 7.04E-05 |
| 218 | AIM2                                                                                                                                                                     | 9447                                                                                                                   | A_32_P44394_riset1  | 7.32E-05 |
| 219 | LOC440731                                                                                                                                                                | 440731                                                                                                                 | A_32_P212373_riset1 | 7.41E-05 |

|     |                  |        |                           |          |
|-----|------------------|--------|---------------------------|----------|
| 220 | AKR1B1           | 231    | MIL_PPPID394308032_riset1 | 7.54E-05 |
| 221 | THC2393621       | -      | A_32_P165753_riset1       | 7.54E-05 |
| 222 | PTHR1            | 5745   | A_23_P167027_riset1       | 7.59E-05 |
| 223 | ZNF14            | 7561   | A_23_P101811_riset1       | 7.67E-05 |
| 224 | ERG              | 2078   | A_23_P57323_riset1        | 7.72E-05 |
| 225 | IRF4             | 3662   | A_23_P214361_riset1       | 7.72E-05 |
| 226 | TANK             | 10010  | TANK_riset2               | 7.85E-05 |
| 227 | TRIM4            | 89122  | A_23_P500601_riset1       | 7.85E-05 |
| 228 | AMFR             | 267    | A_23_P141005_riset1       | 7.89E-05 |
| 229 | HLTF             | 6596   | A_24_P277155_riset1       | 7.89E-05 |
| 230 | CD6              | 923    | A_23_P311875_riset1       | 8.02E-05 |
| 231 | ANXA3            | 306    | A_23_P121716_riset1       | 8.27E-05 |
| 232 | C6ORF108         | 10591  | A_23_P167951_riset1       | 8.27E-05 |
| 233 | CLC              | 1178   | A_23_P101683_riset1       | 8.31E-05 |
| 234 | AUTS2            | 26053  | A_32_P809435_riset1       | 8.35E-05 |
| 235 | ZNF549           | 256051 | A_23_P399146_riset1       | 8.47E-05 |
| 236 | TKTL1            | 8277   | A_23_P259901_riset1       | 8.47E-05 |
| 237 | NR3C2            | 4306   | A_23_P392470_riset2       | 8.51E-05 |
| 238 | MAOB             | 4129   | A_23_P85008_riset1        | 8.59E-05 |
| 239 | IL28RA           | 163702 | IL28RA_riset2             | 8.71E-05 |
| 240 | DNMT1            | 1786   | A_23_P27490_riset1        | 8.75E-05 |
| 241 | FCAR             | 2204   | A_24_P348265_riset1       | 8.95E-05 |
| 242 | PLEKHG1          | 57480  | A_24_P6517_riset1         | 8.99E-05 |
| 243 | A_24_P91025<br>5 | -      | A_24_P910255_riset1       | 9.21E-05 |
| 244 | ZAK              | 51776  | A_23_P318300_riset1       | 9.40E-05 |
| 245 | IL4              | 3565   | A_23_P213706_riset1       | 9.40E-05 |
| 246 | RTTN             | 25914  | A_24_P108301_riset1       | 9.66E-05 |
| 247 | STMN1            | 3925   | A_23_P200866_riset1       | 9.69E-05 |
| 248 | SEPT09           | 6414   | A_32_P344025_riset1       | 9.76E-05 |
| 249 | A_23_P39349<br>5 | -      | A_23_P393495_riset1       | 9.76E-05 |
| 250 | DYSF             | 8291   | A_23_P39925_riset1        | 9.80E-05 |
| 251 | BCL11A           | 53335  | A_24_P402588_riset1       | 9.80E-05 |

|     |                                                                                                    |                                                                                                                        |                           |          |
|-----|----------------------------------------------------------------------------------------------------|------------------------------------------------------------------------------------------------------------------------|---------------------------|----------|
| 252 | FLJ14186;LOC441124;LOC646434;LOC653056;LOC728417;LOC728728;LOC729021;LOC729028;LOC730953;LOC731275 | 388312;388572;401149;441124;642788;646301;646434;653056;728100;728417;728728;728790;729021;729028;729737;730953;731275 | A_32_P28158_riset1        | 9.87E-05 |
| 253 | RASGRP1                                                                                            | 10125                                                                                                                  | A_23_P124642_riset1       | 9.87E-05 |
| 254 | PPP3CC                                                                                             | 5533                                                                                                                   | PPP3CC_riset2             | 9.90E-05 |
| 255 | EIF2C4                                                                                             | 192670                                                                                                                 | A_23_P23171_riset1        | 9.90E-05 |
| 256 | MTX3                                                                                               | 345778                                                                                                                 | MIL_PPPID394307960_riset1 | 9.94E-05 |
| 257 | DDEF1IT1                                                                                           | 29065                                                                                                                  | A_24_P360499_riset1       | 9.97E-05 |
| 258 | LOC100129122                                                                                       | 100129122                                                                                                              | A_32_P231493_riset1       | 1.01E-04 |
| 259 | PDE2A                                                                                              | 5138                                                                                                                   | A_23_P401106_riset1       | 1.05E-04 |
| 260 | ITGAM                                                                                              | 3684                                                                                                                   | A_23_P124108_riset1       | 1.06E-04 |
| 261 | MIZF                                                                                               | 25988                                                                                                                  | A_23_P13176_riset1        | 1.07E-04 |
| 262 | SET                                                                                                | 6418                                                                                                                   | MIL_PPPID400032825_riset1 | 1.07E-04 |
| 263 | RBBP9                                                                                              | 10741                                                                                                                  | A_23_P257532_riset1       | 1.10E-04 |
| 264 | SLC26A8                                                                                            | 116369                                                                                                                 | A_23_P30950_riset1        | 1.11E-04 |
| 265 | A_24_P110487                                                                                       | -                                                                                                                      | A_24_P110487_riset1       | 1.12E-04 |
| 266 | IL10RA                                                                                             | 3587                                                                                                                   | A_24_P107303_riset1       | 1.12E-04 |
| 267 | FLJ22662                                                                                           | 79887                                                                                                                  | A_23_P87709_riset1        | 1.15E-04 |
| 268 | SPI1                                                                                               | 6688                                                                                                                   | A_23_P115998_riset1       | 1.15E-04 |
| 269 | THC2296737                                                                                         | -                                                                                                                      | A_24_P698128_riset1       | 1.15E-04 |
| 270 | LMNA                                                                                               | 4000                                                                                                                   | A_24_P162718_riset1       | 1.15E-04 |
| 271 | FCER1A                                                                                             | 2205                                                                                                                   | A_23_P103765_riset1       | 1.16E-04 |
| 272 | GCLM                                                                                               | 2730                                                                                                                   | A_23_P103996_riset1       | 1.17E-04 |
| 273 | INTS10                                                                                             | 55174                                                                                                                  | A_23_P157607_riset1       | 1.18E-04 |
| 274 | GPX7                                                                                               | 2882                                                                                                                   | A_23_P73972_riset1        | 1.18E-04 |
| 275 | CD40LG                                                                                             | 959                                                                                                                    | A_23_P62220_riset1        | 1.19E-04 |
| 276 | TACSTD2                                                                                            | 4070                                                                                                                   | A_23_P149529_riset1       | 1.19E-04 |
| 277 | KLF7                                                                                               | 8609                                                                                                                   | A_23_P67980_riset1        | 1.20E-04 |
| 278 | THC2317292                                                                                         | -                                                                                                                      | A_32_P5148_riset1         | 1.20E-04 |
| 279 | FCER1G                                                                                             | 2207                                                                                                                   | A_24_P679984_riset1       | 1.23E-04 |
| 280 | SNHG5                                                                                              | 387066                                                                                                                 | A_23_P361085_riset1       | 1.23E-04 |
| 281 | CTSF                                                                                               | 8722                                                                                                                   | A_23_P24433_riset1        | 1.24E-04 |

|     |                       |              |                           |          |
|-----|-----------------------|--------------|---------------------------|----------|
| 282 | UPF3A                 | 65110        | A_32_P202778_riset1       | 1.24E-04 |
| 283 | CD81                  | 975          | A_23_P13423_riset1        | 1.25E-04 |
| 284 | CCDC88A               | 55704        | A_24_P20120_riset1        | 1.27E-04 |
| 285 | DAD1                  | 1603         | A_24_P47870_riset1        | 1.27E-04 |
| 286 | EIF3E                 | 3646         | A_24_P206427_riset1       | 1.27E-04 |
| 287 | RPL14                 | 9045         | A_23_P18294_riset1        | 1.29E-04 |
| 288 | HS3ST3B1              | 9953         | A_24_P23625_riset1        | 1.30E-04 |
| 289 | ANKFY1                | 51479        | A_24_P151834_riset1       | 1.30E-04 |
| 290 | LYPD1                 | 116372       | A_32_P101031_riset1       | 1.30E-04 |
| 291 | DSE                   | 29940        | A_23_P19226_riset1        | 1.31E-04 |
| 292 | CD3D                  | 915          | MIL_PPPID394307868_riset1 | 1.32E-04 |
| 293 | TMEM106B              | 54664        | A_32_P353072_riset1       | 1.34E-04 |
| 294 | CYFIP2                | 26999        | A_23_P167509_riset1       | 1.35E-04 |
| 295 | LIN7A                 | 8825         | A_23_P99253_riset1        | 1.36E-04 |
| 296 | ANK3                  | 288          | A_32_P33304_riset1        | 1.37E-04 |
| 297 | RPL23                 | 9349         | A_23_P26713_riset1        | 1.39E-04 |
| 298 | PTPLAD1;LO<br>C732402 | 51495;732402 | A_23_P99927_riset1        | 1.40E-04 |
| 299 | LYCAT                 | 253558       | A_32_P92505_riset1        | 1.40E-04 |
| 300 | MAD2L1                | 4085         | A_23_P92441_riset1        | 1.41E-04 |
| 301 | FCRL5                 | 83416        | A_23_P201211_riset1       | 1.41E-04 |
| 302 | PITPNM1               | 9600         | PITPNM1_riset2            | 1.43E-04 |
| 303 | C1QB                  | 713          | A_23_P137366_riset1       | 1.43E-04 |
| 304 | RPL15                 | 6138         | A_23_P253200_riset1       | 1.43E-04 |
| 305 | DDR1                  | 780          | A_24_P123601_riset1       | 1.48E-04 |
| 306 | SERPINA1              | 5265         | A_23_P218111_riset1       | 1.59E-04 |
| 307 | COX6A1                | 1337         | COX6A1_riset2             | 1.60E-04 |
| 308 | RASGRP4               | 115727       | A_23_P431310_riset1       | 1.60E-04 |
| 309 | PCTK1                 | 5127         | A_24_P233663_riset1       | 1.67E-04 |
| 310 | THAP2                 | 83591        | A_24_P350437_riset1       | 1.74E-04 |
| 311 | CTSB                  | 1508         | MIL_PPPID394453458_riset1 | 1.78E-04 |
| 312 | TRA@                  | 6955         | A_23_P258504_riset1       | 1.78E-04 |
| 313 | ATP8A2                | 51761        | A_23_P258612_riset1       | 1.81E-04 |
| 314 | UBE2T                 | 29089        | A_23_P115482_riset1       | 1.81E-04 |
| 315 | LTF                   | 4057         | MIL_PPPID397416163_riset1 | 1.81E-04 |
| 316 | AKAP2                 | 11217;445815 | AKAP2_riset2              | 1.83E-04 |

|     |                  |        |                           |          |
|-----|------------------|--------|---------------------------|----------|
| 317 | THUMPD1          | 55623  | A_24_P90878_riset1        | 1.86E-04 |
| 318 | FCGR1A           | 2209   | A_23_P63395_riset1        | 1.89E-04 |
| 319 | RETN             | 56729  | A_23_P119222_riset1       | 1.92E-04 |
| 320 | NUDCD2           | 134492 | A_23_P360245_riset1       | 1.93E-04 |
| 321 | LOC645638        | 645638 | A_24_P691826_riset1       | 1.94E-04 |
| 322 | PTPRCAP          | 5790   | A_23_P98173_riset1        | 1.96E-04 |
| 323 | C14ORF106        | 55320  | A_23_P106162_riset1       | 1.97E-04 |
| 324 | AF314543         | -      | A_24_P196307_riset1       | 1.99E-04 |
| 325 | A_24_P85018<br>7 | -      | A_24_P850187_riset1       | 2.01E-04 |
| 326 | CHIT1            | 1118   | A_23_P126278_riset1       | 2.01E-04 |
| 327 | PDE8B            | 8622   | A_24_P197537_riset1       | 2.01E-04 |
| 328 | HSPA9            | 3313   | A_23_P213973_riset1       | 2.02E-04 |
| 329 | SH2D1B           | 117157 | A_32_P324533_riset1       | 2.02E-04 |
| 330 | MEF2A            | 4205   | A_24_P1731_riset1         | 2.04E-04 |
| 331 | TMTC3            | 160418 | A_24_P944222_riset1       | 2.04E-04 |
| 332 | MIRN155          | 114614 | A_32_P108156_riset1       | 2.07E-04 |
| 333 | GALNT14          | 79623  | A_23_P67847_riset1        | 2.10E-04 |
| 334 | PPIA             | 5478   | MIL_PPPID404158893_riset2 | 2.10E-04 |
| 335 | BCKDHB           | 594    | A_24_P239664_riset1       | 2.12E-04 |
| 336 | SFRS2            | 6427   | A_23_P77776_riset1        | 2.12E-04 |
| 337 | GALNT4           | 8693   | A_24_P942370_riset1       | 2.12E-04 |
| 338 | SATB1            | 6304   | SATB1_riset2              | 2.13E-04 |
| 339 | PRKCE            | 5581   | A_23_P250564_riset1       | 2.14E-04 |
| 340 | ZNF17            | 7565   | A_32_P401723_riset1       | 2.16E-04 |
| 341 | PRIM1            | 5557   | A_23_P25019_riset1        | 2.16E-04 |
| 342 | PRKCH            | 5583   | PRKCH_riset2              | 2.17E-04 |
| 343 | MAP3K7IP3        | 257397 | A_23_P305033_riset1       | 2.18E-04 |
| 344 | FAU              | 2197   | A_23_P127438_riset1       | 2.19E-04 |
| 345 | FLT3             | 2322   | MIL_PPPID394308044_riset1 | 2.20E-04 |
| 346 | PLCL2            | 23228  | A_23_P80594_riset1        | 2.22E-04 |
| 347 | HSPD1            | 3329   | A_32_P25273_riset2        | 2.24E-04 |
| 348 | ACTN4            | 81     | A_23_P101655_riset1       | 2.25E-04 |
| 349 | TXNDC9           | 10190  | A_23_P154330_riset1       | 2.27E-04 |
| 350 | THC2432515       | -      | A_32_P184268_riset1       | 2.29E-04 |
| 351 | ZWILCH           | 55055  | A_32_P129306_riset1       | 2.32E-04 |

|     |                 |             |                           |          |
|-----|-----------------|-------------|---------------------------|----------|
| 352 | SH2D1B          | 117157      | A_32_P324533_riset1       | 2.32E-04 |
| 353 | CAMP            | 820         | A_23_P253791_riset1       | 2.34E-04 |
| 354 | TUBB;TUBB<br>2A | 203068;7280 | A_23_P19291_riset1        | 2.34E-04 |
| 355 | AKAP1           | 8165        | AKAP1_riset2              | 2.35E-04 |
| 356 | DTNBP1          | 84062       | A_24_P145316_riset1       | 2.36E-04 |
| 357 | ADD3            | 120         | A_24_P90097_riset1        | 2.36E-04 |
| 358 | ZNF573          | 126231      | A_23_P339079_riset1       | 2.38E-04 |
| 359 | CHST2           | 9435        | CHST2_riset2_piqor        | 2.41E-04 |
| 360 | ARG1            | 383         | A_23_P111321_riset1       | 2.44E-04 |
| 361 | SSFA2           | 6744        | A_24_P924040_riset1       | 2.52E-04 |
| 362 | DHX9            | 1660        | A_23_P97749_riset1        | 2.54E-04 |
| 363 | UBE2CBP         | 90025       | A_24_P626931_riset1       | 2.56E-04 |
| 364 | DEFA4           | 1669        | A_23_P326080_riset1       | 2.58E-04 |
| 365 | HLA-DRA         | 3122        | A_32_P87697_riset1        | 2.64E-04 |
| 366 | DNTT            | 1791        | DNTT_riset2               | 2.65E-04 |
| 367 | ZDHHC3          | 51304       | A_24_P342880_riset1       | 2.68E-04 |
| 368 | RHBDD1          | 84236       | A_24_P134834_riset1       | 2.69E-04 |
| 369 | IL7R            | 3575        | A_23_P404494_riset1       | 2.69E-04 |
| 370 | SFT2D3          | 84826       | A_23_P5566_riset1         | 2.72E-04 |
| 371 | KLRG1           | 10219       | A_23_P64898_riset1        | 2.75E-04 |
| 372 | MSR1            | 4481        | MIL_PPPID397416287_riset1 | 2.77E-04 |
| 373 | ABI2            | 10152       | A_24_P933418_riset1       | 2.77E-04 |
| 374 | NDFIP2          | 54602       | A_24_P264909_riset1       | 2.78E-04 |
| 375 | IFT80           | 57560       | A_23_P316150_riset1       | 2.79E-04 |
| 376 | BST1            | 683         | A_23_P7325_riset1         | 2.80E-04 |
| 377 | HLA-DQA2        | 3118        | A_23_P42302_riset1        | 2.81E-04 |
| 378 | VSTM3           | 201633      | A_23_P80528_riset1        | 2.86E-04 |
| 379 | CCDC123         | 84902       | A_24_P145229_riset1       | 2.89E-04 |
| 380 | AMIGO1          | 57463       | A_24_P302506_riset1       | 2.93E-04 |
| 381 | NDUFB5          | 4711        | A_23_P57848_riset1        | 2.96E-04 |
| 382 | PIP4K2A         | 5305        | A_23_P104344_riset1       | 2.97E-04 |
| 383 | BZRAP1          | 9256        | A_24_P113131_riset1       | 3.01E-04 |
| 384 | FURIN           | 5045        | A_23_P3361_riset1         | 3.06E-04 |
| 385 | GNG7            | 2788        | A_32_P136295_riset1       | 3.08E-04 |
| 386 | DOK3            | 79930       | A_23_P133506_riset1       | 3.09E-04 |

|     |                            |                     |                           |          |
|-----|----------------------------|---------------------|---------------------------|----------|
| 387 | KIAA0888                   | 26049               | A_23_P423074_riset1       | 3.11E-04 |
| 388 | DHRS12                     | 79758               | A_23_P205200_riset1       | 3.15E-04 |
| 389 | SLPI                       | 6590                | A_23_P91230_riset1        | 3.23E-04 |
| 390 | GLDC                       | 2731                | A_23_P123596_riset1       | 3.25E-04 |
| 391 | RSL1D1                     | 26156               | A_24_P778836_riset1       | 3.35E-04 |
| 392 | PTMA                       | 5757                | A_32_P746413_riset1       | 3.38E-04 |
| 393 | CDK4                       | 1019                | A_23_P24997_riset1        | 3.40E-04 |
| 394 | BC033983                   | -                   | A_24_P810084_riset1       | 3.44E-04 |
| 395 | STAT4                      | 6775                | STAT4_riset2_piqor        | 3.49E-04 |
| 396 | FAT                        | 2195                | A_32_P368940_riset1       | 3.58E-04 |
| 397 | ZNF264                     | 9422                | MIL_PPPID394453377_riset1 | 3.62E-04 |
| 398 | PILRB                      | 29990               | A_23_P19829_riset1        | 3.62E-04 |
| 399 | EVI2B                      | 2124                | A_23_P66694_riset1        | 3.63E-04 |
| 400 | C5ORF28                    | 64417               | A_23_P121875_riset1       | 3.68E-04 |
| 401 | A_23_P399604               | -                   | A_23_P399604_riset1       | 3.73E-04 |
| 402 | FAM108A1;FAM108A2;FAM108A3 | 653401;728917;81926 | MIL_PPPID399806187_riset1 | 3.82E-04 |
| 403 | RHOBTB3                    | 22836               | A_23_P92710_riset1        | 3.83E-04 |
| 404 | PLCG1                      | 5335                | MIL_PPPID397416315_riset1 | 3.86E-04 |
| 405 | SLC7A8                     | 23428               | A_23_P205489_riset1       | 3.90E-04 |
| 406 | PPARA                      | 5465                | A_24_P570049_riset1       | 3.90E-04 |
| 407 | PBX1                       | 5087                | A_23_P62948_riset1        | 3.93E-04 |
| 408 | RPS27L                     | 51065               | A_23_P14734_riset1        | 3.95E-04 |
| 409 | C8ORF60                    | 619426              | A_24_P59387_riset1        | 4.02E-04 |
| 410 | OLAH                       | 55301               | A_23_P161458_riset1       | 4.04E-04 |
| 411 | MKI67IP                    | 84365               | A_23_P50897_riset1        | 4.08E-04 |
| 412 | C16ORF63                   | 123811              | A_23_P390744_riset1       | 4.09E-04 |
| 413 | PEX3                       | 8504                | A_23_P259328_riset1       | 4.12E-04 |
| 414 | FLJ21272                   | 80100               | A_23_P11922_riset1        | 4.15E-04 |
| 415 | TOP2B                      | 7155                | A_23_P121095_riset1       | 4.15E-04 |
| 416 | ICAM2                      | 3384                | A_23_P152655_riset1       | 4.25E-04 |
| 417 | WWP2                       | 11060               | WWP2_1_riset2             | 4.27E-04 |
| 418 | SMAD3                      | 4088                | A_23_P48936_riset1        | 4.29E-04 |
| 419 | QRSL1                      | 55278               | A_24_P63799_riset1        | 4.31E-04 |
| 420 | APOB48R                    | 55911               | A_23_P54770_riset1        | 4.37E-04 |



|     |                 |             |                           |          |
|-----|-----------------|-------------|---------------------------|----------|
| 421 | TNRC8           | 57690       | A_23_P15765_riset1        | 4.37E-04 |
| 422 | SLC39A8         | 64116       | A_23_P41424_riset1        | 4.37E-04 |
| 423 | MAPK14          | 1432        | MAPK14_1_riset2           | 4.38E-04 |
| 424 | EFCAB2          | 84288       | A_23_P149476_riset1       | 4.45E-04 |
| 425 | PRKCD           | 5580        | PRKCD_riset2              | 4.46E-04 |
| 426 | WDR21A          | 26094       | A_23_P370035_riset1       | 4.47E-04 |
| 427 | DBI             | 1622        | A_23_P79199_riset1        | 4.48E-04 |
| 428 | B3GNT5          | 84002       | A_23_P18372_riset1        | 4.50E-04 |
| 429 | C5ORF39         | 389289      | A_23_P431591_riset1       | 4.56E-04 |
| 430 | EMR4            | 326342      | MIL_PPPID399200170_riset1 | 4.57E-04 |
| 431 | ASF1A           | 25842       | MIL_PPPID394307924_riset1 | 4.62E-04 |
| 432 | FLJ36840        | 645524      | A_24_P59471_riset1        | 4.63E-04 |
| 433 | PDCD6           | 10016       | A_23_P218997_riset1       | 4.64E-04 |
| 434 | SRXN1           | 140809      | A_23_P320113_riset1       | 4.67E-04 |
| 435 | RP2             | 6102        | A_23_P22433_riset1        | 4.71E-04 |
| 436 | C1QBP           | 708         | A_23_P370434_riset1       | 4.72E-04 |
| 437 | FLJ32866        | 731424      | MIL_PPPID400032869_riset1 | 4.73E-04 |
| 438 | CCRL2;LOC727811 | 727811;9034 | A_24_P97405_riset1        | 4.73E-04 |
| 439 | RHCE;RHD        | 6006;6007   | MIL_PPPID399806229_riset1 | 4.87E-04 |
| 440 | MTA3            | 57504       | A_23_P411431_riset1       | 4.90E-04 |
| 441 | CST7            | 8530        | A_23_P68601_riset1        | 4.91E-04 |
| 442 | CCT2            | 10576       | A_23_P105392_riset1       | 4.94E-04 |
| 443 | XBP1            | 7494        | A_23_P120845_riset1       | 4.97E-04 |
| 444 | ATP5F1          | 515         | A_23_P46275_riset1        | 4.98E-04 |
| 445 | EVI5            | 7813        | A_24_P96593_riset1        | 5.09E-04 |
| 446 | LEPROT          | 54741       | A_24_P148094_riset1       | 5.09E-04 |
| 447 | FGD2            | 221472      | A_23_P300852_riset1       | 5.18E-04 |
| 448 | WHDC1L1         | 339005      | A_24_P118489_riset1       | 5.18E-04 |
| 449 | AKAP8L          | 26993       | A_23_P153767_riset1       | 5.20E-04 |
| 450 | VSIG4           | 11326       | A_23_P217269_riset1       | 5.20E-04 |
| 451 | BZW1            | 9689        | MIL_PPPID399200334_riset1 | 5.20E-04 |
| 452 | CREBL2          | 1389        | A_24_P56194_riset1        | 5.22E-04 |
| 453 | GRN             | 2896        | A_23_P49708_riset1        | 5.28E-04 |
| 454 | PCGF6           | 84108       | A_23_P115703_riset1       | 5.29E-04 |
| 455 | LMO2            | 4005        | A_23_P53126_riset1        | 5.30E-04 |

|     |                 |             |                           |          |
|-----|-----------------|-------------|---------------------------|----------|
| 456 | IQCK            | 124152      | A_23_P324523_riset1       | 5.32E-04 |
| 457 | KIF1C           | 10749       | KIF1C_riset2              | 5.33E-04 |
| 458 | KIF3C           | 3797        | A_23_P120325_riset1       | 5.37E-04 |
| 459 | PLAU            | 5328        | A_23_P24104_riset1        | 5.45E-04 |
| 460 | FYN             | 2534        | MIL_PPPID402610592_riset2 | 5.46E-04 |
| 461 | HEATR1          | 55127       | A_23_P103628_riset1       | 5.52E-04 |
| 462 | AF113698        | -           | A_24_P341646_riset1       | 5.52E-04 |
| 463 | TCIRG1          | 10312       | TCIRG1_riset2             | 5.58E-04 |
| 464 | CLCF1           | 23529       | A_23_P138760_riset1       | 5.62E-04 |
| 465 | KLF1            | 10661       | A_32_P135555_riset1       | 5.64E-04 |
| 466 | MGC24039        | 160518      | A_23_P379746_riset1       | 5.74E-04 |
| 467 | NFE2            | 4778        | NFE2_riset2               | 5.76E-04 |
| 468 | PFKM            | 5213        | A_24_P98914_riset1        | 5.78E-04 |
| 469 | PLCL1           | 5334        | A_24_P294199_riset1       | 5.80E-04 |
| 470 | CCR8            | 1237        | A_23_P211699_riset1       | 5.82E-04 |
| 471 | CKB             | 1152        | A_23_P25674_riset1        | 5.90E-04 |
| 472 | FLJ30277        | -           | A_24_P162128_riset1       | 5.93E-04 |
| 473 | C20ORF103       | 24141       | A_23_P40295_riset1        | 6.04E-04 |
| 474 | LTB             | 4050        | A_23_P93348_riset1        | 6.07E-04 |
| 475 | CHST11          | 50515       | A_23_P139919_riset1       | 6.10E-04 |
| 476 | CEACAM1         | 634         | A_24_P382319_riset1       | 6.10E-04 |
| 477 | CALML4          | 91860       | MIL_PPPID394453361_riset1 | 6.11E-04 |
| 478 | RBMS1           | 5937        | MIL_PPPID394307820_riset1 | 6.12E-04 |
| 479 | TFB1M;TIA<br>M2 | 26230;51106 | A_23_P93499_riset1        | 6.17E-04 |
| 480 | LOC388210       | 388210      | MIL_PPPID400032853_riset1 | 6.20E-04 |
| 481 | MCM3            | 4172        | A_23_P7873_riset2         | 6.22E-04 |
| 482 | IGHA1           | -           | A_23_P136026_riset1       | 6.30E-04 |
| 483 | IGLV3-19        | 28797       | A_24_P161764_riset1       | 6.30E-04 |
| 484 | C1ORF142        | 116841      | A_23_P393607_riset1       | 6.35E-04 |
| 485 | FANCE           | 2178        | A_23_P42335_riset1        | 6.36E-04 |
| 486 | AK5             | 26289       | A_24_P342632_riset1       | 6.38E-04 |
| 487 | NAP1L1          | 4673        | A_32_P59262_rev_riset1    | 6.39E-04 |
| 488 | DDX58           | 23586       | A_23_P20814_riset1        | 6.42E-04 |
| 489 | IRAK2           | 3656        | IRAK2_riset2              | 6.43E-04 |
| 490 | GARNL1          | 253959      | A_23_P151565_riset1       | 6.43E-04 |

|     |                  |        |                           |          |
|-----|------------------|--------|---------------------------|----------|
| 491 | NARS2            | 79731  | A_23_P24960_riset1        | 6.44E-04 |
| 492 | CSF2RB           | 1439   | A_23_P120899_riset1       | 6.47E-04 |
| 493 | CASP5            | 838    | CASP5_riset2              | 6.47E-04 |
| 494 | DIMT1L           | 27292  | A_23_P58529_riset1        | 6.48E-04 |
| 495 | GNB4             | 59345  | A_32_P171313_riset1       | 6.54E-04 |
| 496 | TNFAIP6          | 7130   | A_23_P165624_riset1       | 6.55E-04 |
| 497 | IL1RN            | 3557   | A_23_P209990_riset1       | 6.58E-04 |
| 498 | DFNB59           | 494513 | A_24_P630490_riset1       | 6.62E-04 |
| 499 | EXOSC1           | 51013  | A_32_P126686_riset1       | 6.71E-04 |
| 500 | SLC25A4          | 291    | A_24_P206047_riset1       | 6.74E-04 |
| 501 | A_24_P49291<br>9 | -      | A_24_P492919_riset1       | 6.76E-04 |
| 502 | CARD11           | 84433  | A_23_P82324_riset1        | 6.77E-04 |
| 503 | C1ORF217         | 84719  | A_23_P23234_riset1        | 6.77E-04 |
| 504 | SLC25A37         | 51312  | A_32_P197026_riset1       | 6.78E-04 |
| 505 | PSMC6            | 5706   | A_24_P381625_riset1       | 6.80E-04 |
| 506 | NFIA             | 4774   | A_32_P131998_riset1       | 6.82E-04 |
| 507 | TM2D1            | 83941  | A_23_P148959_riset1       | 6.83E-04 |
| 508 | ATR              | 545    | A_23_P136058_riset1       | 6.86E-04 |
| 509 | VCPIP1           | 80124  | A_32_P74366_riset1        | 6.87E-04 |
| 510 | WDR45L           | 56270  | A_23_P207020_riset1       | 6.88E-04 |
| 511 | ATG5             | 9474   | A_24_P175059_riset1       | 6.91E-04 |
| 512 | NUCKS1           | 64710  | A_24_P919789_riset1       | 6.92E-04 |
| 513 | LTB4R            | 1241   | A_23_P151791_riset1       | 6.92E-04 |
| 514 | POLR1D           | 51082  | MIL_PPPID399200298_riset1 | 6.94E-04 |
| 515 | PIGK             | 10026  | A_24_P379512_riset1       | 7.06E-04 |
| 516 | SIP1             | 8487   | A_23_P88194_riset1        | 7.13E-04 |
| 517 | PRICKLE1         | 144165 | A_23_P408285_riset1       | 7.16E-04 |
| 518 | ARHGEF9          | 23229  | A_24_P254551_riset1       | 7.20E-04 |
| 519 | MGC29891         | 126626 | A_24_P191207_riset1       | 7.21E-04 |
| 520 | AQP1             | 358    | A_23_P19894_riset1        | 7.22E-04 |
| 521 | CCDC90B          | 60492  | A_23_P162127_riset1       | 7.25E-04 |
| 522 | SYT11            | 23208  | A_24_P139899_riset1       | 7.26E-04 |
| 523 | LOC440354        | 440354 | A_24_P213487_riset1       | 7.31E-04 |
| 524 | TRD@             | 6964   | MIL_PPPID399200174_riset1 | 7.36E-04 |
| 525 | KIF21A           | 55605  | A_24_P366315_riset1       | 7.41E-04 |

|     |                  |              |                           |          |
|-----|------------------|--------------|---------------------------|----------|
| 526 | MOBKL2A          | 126308       | MOBKL2A_riset2            | 7.44E-04 |
| 527 | LRBA             | 987          | A_24_P360078_riset1       | 7.48E-04 |
| 528 | AK095738         | -            | A_32_P20221_riset1        | 7.54E-04 |
| 529 | CENPQ            | 55166        | A_23_P70328_riset1        | 7.58E-04 |
| 530 | CXCL16           | 58191        | CXCL16_riset2             | 7.63E-04 |
| 531 | USP47            | 55031        | A_23_P403588_riset1       | 7.64E-04 |
| 532 | TGFBR3           | 7049         | A_23_P200780_riset1       | 7.70E-04 |
| 533 | CD96             | 10225        | A_23_P44154_riset1        | 7.70E-04 |
| 534 | PTK2B            | 2185         | PTK2B_riset2              | 7.73E-04 |
| 535 | CDC42BPA         | 8476         | A_24_P944299_riset1       | 7.76E-04 |
| 536 | C21ORF34         | 388815       | A_24_P229536_riset1       | 7.77E-04 |
| 537 | N-PAC            | 84656        | N-PAC_riset2              | 7.83E-04 |
| 538 | TMSB4X;TM<br>SL3 | 7114;7117    | MIL_PPPID399806171_riset1 | 7.93E-04 |
| 539 | A_24_P29730<br>2 | -            | A_24_P297302_riset1       | 7.93E-04 |
| 540 | LTBP3            | 4054         | A_32_P72340_riset1        | 7.95E-04 |
| 541 | MNAT1            | 4331         | A_23_P32615_riset1        | 8.02E-04 |
| 542 | DNAJC18          | 202052       | A_32_P149251_riset1       | 8.03E-04 |
| 543 | PRNP             | 5621         | A_23_P109143_riset1       | 8.04E-04 |
| 544 | BCL2             | 596          | MIL_PPPID394453506_riset1 | 8.04E-04 |
| 545 | IL1R2            | 7850         | A_23_P79398_riset1        | 8.05E-04 |
| 546 | ARHGEF12         | 23365        | A_24_P175783_riset1       | 8.10E-04 |
| 547 | SRRD;TFIP11      | 24144;402055 | A_32_P135382_riset1       | 8.12E-04 |
| 548 | RASGEF1A         | 221002       | A_23_P391344_riset1       | 8.17E-04 |
| 549 | GPRASP1          | 9737         | A_32_P769161_riset1       | 8.20E-04 |
| 550 | UCP3             | 7352         | A_23_P203601_riset1       | 8.21E-04 |
| 551 | GNAQ             | 2776         | A_23_P39990_riset1        | 8.26E-04 |
| 552 | DHX8             | 1659         | A_23_P124224_riset1       | 8.44E-04 |
| 553 | FAM29A           | 54801        | A_32_P3290_riset1         | 8.46E-04 |
| 554 | ABCA1            | 19           | A_24_P289265_riset1       | 8.47E-04 |
| 555 | PCM1             | 5108         | A_24_P555510_riset1       | 8.54E-04 |
| 556 | TBCD             | 6904         | A_24_P275873_riset1       | 8.54E-04 |
| 557 | AGMAT            | 79814        | A_24_P936171_riset1       | 8.60E-04 |
| 558 | IFITM2           | 10581        | IFITM2_riset2             | 8.61E-04 |
| 559 | PSMB4            | 5692         | A_23_P761_riset1          | 8.62E-04 |

|     |                    |             |                           |          |
|-----|--------------------|-------------|---------------------------|----------|
| 560 | ITGAE              | 3682        | A_23_P218378_riset1       | 8.64E-04 |
| 561 | A_24_P94231<br>2   | -           | A_24_P942312_riset1       | 8.65E-04 |
| 562 | ARPC4              | 10093       | A_24_P20383_riset1        | 8.70E-04 |
| 563 | MAFG;LOC6<br>44132 | 4097;644132 | A_23_P78209_riset1        | 8.73E-04 |
| 564 | GABARAPL1          | 23710       | A_23_P162640_riset1       | 8.76E-04 |
| 565 | ELP2               | 55250       | A_23_P78438_riset1        | 8.83E-04 |
| 566 | ACSL1              | 2180        | MIL_PPPID394307996_riset1 | 8.92E-04 |
| 567 | LOC441641          | 441641      | A_24_P307443_riset1       | 9.07E-04 |
| 568 | C19ORF43           | 79002       | A_23_P164821_riset1       | 9.08E-04 |
| 569 | TSPAN5             | 10098       | A_23_P323930_riset1       | 9.08E-04 |
| 570 | RORA               | 6095        | RORA_riset2               | 9.09E-04 |
| 571 | TRAF7              | 84231       | TRAF7_riset2              | 9.14E-04 |
| 572 | TLR1               | 7096        | TLR1_riset2               | 9.21E-04 |
| 573 | CD5                | 921         | A_24_P364221_riset1       | 9.23E-04 |
| 574 | TUFT1              | 7286        | A_32_P141184_rev_riset1   | 9.23E-04 |
| 575 | CCR6               | 1235        | A_24_P234921_riset1       | 9.30E-04 |
| 576 | GCC2               | 9648        | A_23_P384085_riset1       | 9.55E-04 |
| 577 | ACOT2              | 10965       | A_23_P3111_riset1         | 9.62E-04 |
| 578 | C1ORF26            | 54823       | A_23_P96931_riset1        | 9.67E-04 |
| 579 | PCNA               | 5111        | A_23_P28886_riset1        | 9.69E-04 |
| 580 | IL2RB              | 3560        | A_24_P203000_riset1       | 9.86E-04 |
| 581 | CCDC98;MR<br>PS18C | 55297       | A_24_P372959_riset1       | 9.89E-04 |
| 582 | GATA3              | 2625        | A_23_P75056_riset1        | 9.91E-04 |
| 583 | ALDH4A1            | 8659        | A_32_P192970_riset1       | 9.93E-04 |
| 584 | AI378923           | -           | A_24_P833024_riset1       | 9.99E-04 |
| 585 | APEX1              | 328         | A_23_P151649_riset1       | 1.01E-03 |
| 586 | ZNF547             | 284306      | A_23_P333592_riset1       | 1.01E-03 |
| 587 | MAL                | 4118        | MIL_PPPID394307800_riset1 | 1.02E-03 |
| 588 | FN1                | 2335        | A_24_P119745_riset1       | 1.02E-03 |
| 589 | KIF3A              | 11127       | A_23_P122027_riset1       | 1.04E-03 |
| 590 | FAIM               | 55179       | A_23_P253932_riset1       | 1.04E-03 |
| 591 | CAD                | 790         | A_23_P40049_riset1        | 1.04E-03 |
| 592 | SSR4               | 6748        | A_23_P259172_riset1       | 1.04E-03 |
| 593 | UCKL1              | 54963       | A_23_P17326_riset1        | 1.05E-03 |

|     |                  |        |                     |          |
|-----|------------------|--------|---------------------|----------|
| 594 | C14ORF129        | 51527  | A_24_P292710_riset1 | 1.06E-03 |
| 595 | GLS              | 2744   | A_23_P39766_riset1  | 1.06E-03 |
| 596 | COX6C            | 1345   | A_23_P8900_riset1   | 1.06E-03 |
| 597 | NGFRAP1          | 27018  | A_23_P45524_riset1  | 1.08E-03 |
| 598 | ITGAX            | 3687   | A_24_P344251_riset1 | 1.11E-03 |
| 599 | ALS2CR13         | 150864 | A_32_P195401_riset1 | 1.11E-03 |
| 600 | CA4              | 762    | A_23_P4096_riset1   | 1.11E-03 |
| 601 | ABCB1            | 5243   | A_23_P82526_riset1  | 1.11E-03 |
| 602 | SOD1             | 6647   | A_23_P154840_riset2 | 1.11E-03 |
| 603 | PIP4K2A          | 5305   | A_23_P104344_riset1 | 1.12E-03 |
| 604 | AF263545         | -      | A_24_P926507_riset1 | 1.12E-03 |
| 605 | ZNF804A          | 91752  | A_32_P316136_riset1 | 1.12E-03 |
| 606 | TACSTD1          | 4072   | A_23_P91081_riset1  | 1.12E-03 |
| 607 | CLEC5A           | 23601  | A_23_P71165_riset1  | 1.12E-03 |
| 608 | ID3              | 3399   | A_23_P137381_riset1 | 1.13E-03 |
| 609 | A_23_P14797<br>0 | -      | A_23_P147970_riset1 | 1.13E-03 |
| 610 | MT2A             | 4502   | A_23_P252413_riset1 | 1.14E-03 |
| 611 | ZDHHC4           | 55146  | A_23_P157147_riset1 | 1.14E-03 |
| 612 | TLOC1            | 7095   | A_23_P357856_riset1 | 1.15E-03 |
| 613 | C5ORF37          | 134359 | A_32_P209079_riset1 | 1.16E-03 |
| 614 | PGM5             | 5239   | A_24_P120907_riset1 | 1.16E-03 |
| 615 | MTERFD2          | 130916 | A_32_P431601_riset1 | 1.17E-03 |
| 616 | GTL3             | 29105  | A_23_P3514_riset1   | 1.17E-03 |
| 617 | AK094334         | -      | A_24_P933514_riset1 | 1.17E-03 |
| 618 | CCR5             | 1234   | A_23_P412321_riset1 | 1.18E-03 |
| 619 | RBM3             | 5935   | RBM3_riset2         | 1.19E-03 |
| 620 | AK095831         | -      | A_24_P639671_riset1 | 1.19E-03 |
| 621 | AF116673         | -      | A_23_P327134_riset1 | 1.21E-03 |
| 622 | LOC162632        | 162632 | A_24_P566764_riset1 | 1.21E-03 |
| 623 | BASP1            | 10409  | A_23_P213386_riset1 | 1.21E-03 |
| 624 | MIER1            | 57708  | A_24_P230916_riset1 | 1.23E-03 |
| 625 | TAF1B            | 9014   | A_23_P165891_riset1 | 1.24E-03 |
| 626 | HSPH1            | 10808  | A_23_P88119_riset2  | 1.24E-03 |
| 627 | GCSH             | 2653   | A_23_P117933_riset1 | 1.24E-03 |
| 628 | PTPN11           | 5781   | A_32_P61757_riset1  | 1.24E-03 |

|     |                                    |                           |                           |          |
|-----|------------------------------------|---------------------------|---------------------------|----------|
| 629 | NOSIP                              | 51070                     | NOSIP_riset2              | 1.25E-03 |
| 630 | BCL6                               | 604                       | BCL6_riset2               | 1.25E-03 |
| 631 | LOC644538                          | 644538                    | A_32_P48842_riset1        | 1.28E-03 |
| 632 | NEDD9                              | 4739                      | A_24_P883577_riset1       | 1.29E-03 |
| 633 | UCHL5                              | 51377                     | A_23_P148798_riset1       | 1.31E-03 |
| 634 | LOC390306                          | -                         | A_24_P392842_riset1       | 1.32E-03 |
| 635 | BCKDHB                             | 594                       | A_24_P239664_riset1       | 1.32E-03 |
| 636 | NUDT16                             | 131870                    | A_23_P310560_riset1       | 1.33E-03 |
| 637 | CD163                              | 9332                      | A_23_P33723_riset1        | 1.33E-03 |
| 638 | DNAJC19                            | 131118                    | A_23_P121396_riset1       | 1.33E-03 |
| 639 | ADH1A                              | 124                       | A_23_P58359_riset1        | 1.34E-03 |
| 640 | DNAJC16                            | 23341                     | A_23_P358009_riset1       | 1.34E-03 |
| 641 | CXCR3                              | 2833                      | A_23_P114299_riset1       | 1.35E-03 |
| 642 | PIN4                               | 5303                      | A_23_P315345_riset1       | 1.35E-03 |
| 643 | ATP6V1G1                           | 9550                      | A_23_P20882_riset1        | 1.36E-03 |
| 644 | M-RIP                              | 23164                     | MIL_PPPID394453401_riset1 | 1.37E-03 |
| 645 | PRKAB2                             | 5565                      | A_24_P105564_riset1       | 1.37E-03 |
| 646 | PPAP2A                             | 8611                      | A_23_P70060_riset1        | 1.41E-03 |
| 647 | HRH2                               | 3274                      | HRH2_riset2               | 1.42E-03 |
| 648 | CRIP3                              | 401262                    | A_23_P156562_riset1       | 1.42E-03 |
| 649 | LOC284262                          | 283788                    | A_24_P497437_riset1       | 1.42E-03 |
| 650 | NPIP;LOC339047;LOC642778;LOC642799 | 339047;642778;642799;9284 | A_32_P189974_riset1       | 1.42E-03 |
| 651 | TGFBR1                             | 7046                      | MIL_PPPID397416295_riset1 | 1.43E-03 |
| 652 | TGFB1                              | 7040                      | A_23_P412335_riset1       | 1.43E-03 |
| 653 | HPCAL4                             | 51440                     | A_24_P139665_riset1       | 1.44E-03 |
| 654 | LIMK1                              | 3984                      | LIMK1_riset2              | 1.44E-03 |
| 655 | NDUFA4                             | 4697                      | A_23_P145777_riset1       | 1.45E-03 |
| 656 | IL24                               | 11009                     | A_23_P51951_riset1        | 1.45E-03 |
| 657 | EIF1                               | 10209                     | A_32_P53049_riset1        | 1.45E-03 |
| 658 | AW270158                           | 0                         | A_24_P389612_riset1       | 1.47E-03 |
| 659 | TSHZ3                              | 57616                     | A_23_P361014_riset1       | 1.47E-03 |
| 660 | FCGR2A;FCGR2C                      | 2212;9103                 | A_23_P85716_riset1        | 1.48E-03 |
| 661 | BC028022                           | -                         | A_32_P159574_riset1       | 1.48E-03 |

|     |               |           |                           |          |
|-----|---------------|-----------|---------------------------|----------|
| 662 | MMP8          | 4317      | A_23_P24493_riset1        | 1.48E-03 |
| 663 | AQP3          | 360       | A_23_P112481_riset1       | 1.49E-03 |
| 664 | PLEK2         | 26499     | A_23_P151506_riset1       | 1.50E-03 |
| 665 | LOC644186     | 643837    | A_32_P196036_riset1       | 1.52E-03 |
| 666 | MANSC1        | 54682     | A_23_P162211_riset1       | 1.53E-03 |
| 667 | MMP9          | 4318      | A_23_P40174_riset1        | 1.54E-03 |
| 668 | SLC10A4       | 201780    | A_23_P314811_riset1       | 1.54E-03 |
| 669 | KIF14         | 9928      | A_23_P149668_riset1       | 1.54E-03 |
| 670 | ORAI3         | 93129     | ORAI3_riset2              | 1.55E-03 |
| 671 | PSMD7         | 5713      | A_23_P106741_riset1       | 1.55E-03 |
| 672 | ZNF227;ZNF235 | 7770;9310 | A_23_P208325_riset1       | 1.56E-03 |
| 673 | REEP3         | 221035    | A_23_P75028_riset1        | 1.56E-03 |
| 674 | PDCD2         | 5134      | A_23_P145153_riset1       | 1.57E-03 |
| 675 | RPAP3         | 79657     | A_23_P2683_riset1         | 1.57E-03 |
| 676 | LOC643641;SPO | -         | A_24_P795230_riset1       | 1.57E-03 |
| 677 | CHMP1A        | 5119      | MIL_PPPID394307932_riset1 | 1.58E-03 |
| 678 | RBL2          | 5934      | A_24_P416159_riset1       | 1.58E-03 |
| 679 | EPRS          | 2058      | A_23_P97632_riset1        | 1.58E-03 |
| 680 | TNFRSF25      | 8718      | TNFRSF25_riset2           | 1.59E-03 |
| 681 | LY9           | 4063      | MIL_PPPID397416255_riset1 | 1.60E-03 |
| 682 | BCS1L         | 617       | A_23_P154086_riset1       | 1.60E-03 |
| 683 | IGBP1         | 3476      | A_23_P171249_riset1       | 1.60E-03 |
| 684 | RBM3          | 5935      | RBM3_riset2               | 1.62E-03 |
| 685 | CFLAR         | 8837      | CFLAR_riset2_piqor        | 1.62E-03 |
| 686 | ABCC4         | 10257     | A_24_P16913_riset1        | 1.62E-03 |
| 687 | ZRANB3        | 84083     | A_23_P412059_riset1       | 1.62E-03 |
| 688 | FAM152A       | 51029     | A_23_P201445_riset1       | 1.62E-03 |
| 689 | JDP2          | 122953    | A_23_P117582_riset1       | 1.63E-03 |
| 690 | AFF3          | 3899      | A_23_P373464_riset1       | 1.64E-03 |
| 691 | CENPM         | 79019     | A_24_P399888_riset1       | 1.64E-03 |
| 692 | LOC342892     | 342892    | A_24_P450596_riset1       | 1.65E-03 |
| 693 | MICAL2        | 9645      | A_23_P24843_riset1        | 1.65E-03 |
| 694 | SPATA6        | 54558     | A_23_P327483_riset1       | 1.66E-03 |
| 695 | LILRB2        | 10288     | LILRB2_riset2             | 1.66E-03 |



|     |                                                                     |                                                 |                           |          |
|-----|---------------------------------------------------------------------|-------------------------------------------------|---------------------------|----------|
| 696 | CCDC46                                                              | 201134                                          | A_32_P391586_riset1       | 1.67E-03 |
| 697 | TTC27                                                               | 55622                                           | A_23_P131227_riset1       | 1.68E-03 |
| 698 | PDGFB                                                               | 5155                                            | PDGFB_riset2_piqor        | 1.69E-03 |
| 699 | ZAP70                                                               | 7535                                            | ZAP70_riset2_piqor        | 1.69E-03 |
| 700 | BCL2L13                                                             | 23786                                           | BCL2L13_riset2            | 1.71E-03 |
| 701 | LOC731062                                                           | 730130                                          | A_24_P695306_riset1       | 1.71E-03 |
| 702 | DEPDC5                                                              | 9681                                            | A_23_P91680_riset1        | 1.72E-03 |
| 703 | THC2385462                                                          | -                                               | A_32_P137819_riset1       | 1.72E-03 |
| 704 | CKS1B                                                               | 1163                                            | A_23_P45917_riset1        | 1.72E-03 |
| 705 | ADAMTS7;LOC388194;LOC390660;LOC400406;LOC400419;LOC441730;LOC642935 | 11173;390660;388194;400406;400419;441730;642935 | A_32_P786651_riset1       | 1.72E-03 |
| 706 | SLC2A3                                                              | 6515                                            | A_24_P81900_riset1        | 1.73E-03 |
| 707 | ZAK                                                                 | 51776                                           | A_23_P318300_riset1       | 1.73E-03 |
| 708 | KIAA0494                                                            | 9813                                            | A_24_P233917_riset1       | 1.73E-03 |
| 709 | MFAP1                                                               | 4236                                            | MFAP1_riset2              | 1.73E-03 |
| 710 | USP45                                                               | 85015                                           | MIL_PPPID399200134_riset1 | 1.74E-03 |
| 711 | LOC283788                                                           | 283788                                          | A_24_P497437_riset1       | 1.74E-03 |
| 712 | PFAS                                                                | 5198                                            | A_23_P402604_riset1       | 1.75E-03 |
| 713 | DIDO1                                                               | 11083                                           | MIL_PPPID399200182_riset1 | 1.75E-03 |
| 714 | THC2380706                                                          | -                                               | A_24_P214556_riset1       | 1.77E-03 |
| 715 | PLD4                                                                | 122618                                          | A_23_P88222_riset1        | 1.77E-03 |
| 716 | MTX2                                                                | 10651                                           | A_23_P120335_riset1       | 1.77E-03 |
| 717 | DDX10                                                               | 1662                                            | A_23_P32938_riset1        | 1.77E-03 |
| 718 | DKFZP564A0769                                                       | -                                               | MIL_PPPID400032813_riset1 | 1.78E-03 |
| 719 | HBXIP                                                               | 10542                                           | A_32_P163361_riset1       | 1.78E-03 |
| 720 | SR140                                                               | 23350                                           | A_24_P943106_riset1       | 1.79E-03 |
| 721 | ORMDL2                                                              | 29095                                           | A_24_P124567_riset1       | 1.79E-03 |
| 722 | THC2377375                                                          | -                                               | A_32_P34703_riset1        | 1.80E-03 |
| 723 | LAX1                                                                | 54900                                           | A_24_P291278_riset1       | 1.81E-03 |
| 724 | LRRC25                                                              | 126364                                          | A_23_P165136_riset1       | 1.81E-03 |
| 725 | AP3S2                                                               | 10239                                           | A_24_P287683_riset1       | 1.81E-03 |
| 726 | SYK                                                                 | 6850                                            | A_23_P9255_riset1         | 1.82E-03 |

|     |                |        |                           |          |
|-----|----------------|--------|---------------------------|----------|
| 727 | POLRMT         | 5442   | A_23_P131096_riset1       | 1.82E-03 |
| 728 | OMD            | 4958   | A_23_P94397_riset1        | 1.83E-03 |
| 729 | KIR3DX1        | 90011  | A_23_P398943_riset1       | 1.83E-03 |
| 730 | TMED10         | 10972  | A_24_P917833_riset1       | 1.83E-03 |
| 731 | FA2H           | 79152  | A_23_P49448_riset1        | 1.84E-03 |
| 732 | MXD1           | 4084   | A_23_P408094_riset1       | 1.85E-03 |
| 733 | ITSN2          | 50618  | MIL_PPPID399200362_riset1 | 1.85E-03 |
| 734 | POLG2          | 11232  | A_23_P26905_riset1        | 1.86E-03 |
| 735 | BACE2          | 25825  | A_23_P154875_riset1       | 1.86E-03 |
| 736 | SLC8A1         | 6546   | A_32_P147078_riset1       | 1.87E-03 |
| 737 | L3MBTL3        | 84456  | A_32_P67533_riset1        | 1.87E-03 |
| 738 | ENTPD5         | 957    | A_23_P117580_riset1       | 1.88E-03 |
| 739 | KLHDC1         | 122773 | A_23_P422766_riset1       | 1.88E-03 |
| 740 | CCR3           | 1232   | A_23_P250302_riset1       | 1.89E-03 |
| 741 | STARD9         | 57519  | A_32_P130641_riset1       | 1.91E-03 |
| 742 | C19ORF18       | 147685 | A_23_P303803_riset1       | 1.91E-03 |
| 743 | VPS11          | 55823  | A_32_P28351_riset1        | 1.92E-03 |
| 744 | POLR3H         | 171568 | A_24_P322847_riset1       | 1.93E-03 |
| 745 | SLC38A2        | 54407  | A_24_P295963_riset1       | 1.93E-03 |
| 746 | MRPS22         | 56945  | A_32_P32503_riset1        | 1.94E-03 |
| 747 | ENST0000037726 | -      | A_24_P494425_riset1       | 1.95E-03 |
| 748 | LUC7L2         | 51631  | A_23_P59787_riset1        | 1.97E-03 |
| 749 | IL1R1          | 3554   | A_24_P200023_riset1       | 1.98E-03 |
| 750 | MYO1B          | 4430   | A_23_P361049_riset1       | 1.98E-03 |
| 751 | IGF1           | 3479   | A_24_P398572_riset1       | 1.98E-03 |
| 752 | ERRFI1         | 54206  | A_23_P46470_riset1        | 2.00E-03 |
| 753 | ABAT           | 18     | A_24_P330684_riset1       | 2.01E-03 |
| 754 | C8ORF13        | 83648  | A_23_P334955_riset1       | 2.01E-03 |
| 755 | RAP1A          | 5906   | A_23_P51746_riset1        | 2.01E-03 |
| 756 | RNF19B         | 127544 | A_23_P321388_riset1       | 2.02E-03 |
| 757 | PTPLAD2        | 401494 | A_32_P101313_riset1       | 2.02E-03 |
| 758 | ZNF24          | 7572   | A_23_P208041_riset1       | 2.03E-03 |
| 759 | RCAN2          | 10231  | MIL_PPPID394307944_riset1 | 2.04E-03 |
| 760 | BX111338       | -      | A_32_P210284_riset1       | 2.04E-03 |
| 761 | C9ORF19        | 152007 | A_32_P164477_rev_riset1   | 2.05E-03 |

|     |              |        |                           |          |
|-----|--------------|--------|---------------------------|----------|
| 762 | KDELC2       | 143888 | MIL_PPPID399200238_riset1 | 2.05E-03 |
| 763 | SLC7A11      | 23657  | A_32_P42684_riset1        | 2.05E-03 |
| 764 | NLRC5        | 84166  | A_23_P253295_riset1       | 2.06E-03 |
| 765 | C5AR1        | 728    | A_23_P303058_riset1       | 2.07E-03 |
| 766 | VCAM1        | 7412   | A_23_P34345_riset1        | 2.09E-03 |
| 767 | DDX51        | 317781 | MIL_PPPID399200214_riset1 | 2.10E-03 |
| 768 | HOMER1       | 9456   | A_23_P41917_riset1        | 2.11E-03 |
| 769 | ZNF75A       | 7627   | A_23_P129587_riset1       | 2.11E-03 |
| 770 | ZNF181       | 339318 | A_23_P50735_riset1        | 2.11E-03 |
| 771 | IKZF1        | 10320  | MIL_PPPID399200138_riset1 | 2.13E-03 |
| 772 | TRAF5        | 7188   | TRAF5_riset2              | 2.13E-03 |
| 773 | ARHGEF11     | 9826   | A_23_P426809_riset1       | 2.14E-03 |
| 774 | KRR1         | 11103  | A_23_P2216_riset1         | 2.15E-03 |
| 775 | RACGAP1      | 29127  | A_23_P65110_riset1        | 2.17E-03 |
| 776 | RDH5         | 5959   | A_24_P218814_riset1       | 2.17E-03 |
| 777 | PDSS2        | 57107  | A_23_P134167_riset1       | 2.18E-03 |
| 778 | SIRPA        | 140885 | A_24_P267619_riset1       | 2.18E-03 |
| 779 | NLRC4        | 58484  | A_23_P119835_riset1       | 2.18E-03 |
| 780 | CTNNAL1      | 8727   | A_23_P157795_riset1       | 2.18E-03 |
| 781 | A_32_P124521 | -      | A_32_P124521_riset1       | 2.18E-03 |
| 782 | TRIM13       | 10206  | A_23_P99360_riset1        | 2.19E-03 |
| 783 | GEMIN7       | 79760  | A_23_P89910_riset1        | 2.19E-03 |
| 784 | RNF24        | 11237  | A_23_P120533_riset1       | 2.20E-03 |
| 785 | FLJ35626     | -      | MIL_PPPID400032821_riset1 | 2.20E-03 |
| 786 | TP63         | 8626   | A_23_P327380_riset1       | 2.20E-03 |
| 787 | ALDH7A1      | 501    | A_23_P70233_riset1        | 2.21E-03 |
| 788 | C2ORF61      | 285051 | A_32_P776863_riset1       | 2.21E-03 |
| 789 | TIMP1        | 7076   | A_23_P62106_riset1        | 2.22E-03 |
| 790 | TMEM97       | 27346  | A_24_P190168_riset1       | 2.23E-03 |
| 791 | IPO9         | 55705  | A_32_P323557_riset1       | 2.23E-03 |
| 792 | CREG1        | 8804   | A_23_P85742_riset1        | 2.25E-03 |
| 793 | IL18RAP      | 8807   | IL18RAP_riset2            | 2.25E-03 |
| 794 | IL15RA       | 3601   | MIL_PPPID394307896_riset1 | 2.25E-03 |
| 795 | SLC25A6      | 293    | A_23_P33752_riset1        | 2.25E-03 |
| 796 | ACSS1        | 84532  | A_23_P120594_riset1       | 2.25E-03 |

|     |              |        |                           |          |
|-----|--------------|--------|---------------------------|----------|
| 797 | HMGN4        | 10473  | A_23_P19389_riset1        | 2.26E-03 |
| 798 | SH3BP5       | 9467   | A_23_P143964_riset1       | 2.26E-03 |
| 799 | REPS1        | 85021  | A_23_P70748_riset1        | 2.27E-03 |
| 800 | COPE         | 11316  | A_23_P209089_riset1       | 2.27E-03 |
| 801 | MTCO1        | 140539 | MTCO1_riset2              | 2.28E-03 |
| 802 | TFEC         | 22797  | A_32_P184390_riset1       | 2.30E-03 |
| 803 | AMBP         | 259    | A_23_P363754_riset1       | 2.30E-03 |
| 804 | CD7          | 924    | A_23_P118862_riset1       | 2.31E-03 |
| 805 | FAM120C      | 54954  | A_32_P67623_riset1        | 2.31E-03 |
| 806 | PSMB1        | 5689   | A_24_P233570_riset2       | 2.32E-03 |
| 807 | EPO          | 2056   | A_23_P145664_riset1       | 2.33E-03 |
| 808 | SRPK3        | 26576  | A_23_P114381_riset1       | 2.34E-03 |
| 809 | ATP1A1       | 476    | A_23_P1075_riset1         | 2.35E-03 |
| 810 | ANG          | 283    | A_23_P428738_riset1       | 2.35E-03 |
| 811 | UBA52        | 7311   | MIL_PPPID397416235_riset1 | 2.36E-03 |
| 812 | RAB7L1       | 8934   | A_24_P234094_riset1       | 2.36E-03 |
| 813 | INSM1        | 3642   | A_23_P109184_riset1       | 2.36E-03 |
| 814 | DOCK5        | 80005  | A_23_P60089_riset1        | 2.36E-03 |
| 815 | KLRF1        | 51348  | A_32_P158966_riset1       | 2.37E-03 |
| 816 | A_24_P760324 | -      | A_24_P760324_riset1       | 2.37E-03 |
| 817 | GPR64        | 10149  | A_23_P253692_riset1       | 2.38E-03 |
| 818 | WDR54        | 84058  | A_23_P68072_riset1        | 2.39E-03 |
| 819 | LOC201725    | 201725 | A_23_P54720_riset1        | 2.39E-03 |
| 820 | CD82         | 3732   | CD82_riset2               | 2.40E-03 |
| 821 | HRB          | 3267   | MIL_PPPID394453365_riset1 | 2.41E-03 |
| 822 | SULT1C2      | 6819   | MIL_PPPID394307976_riset1 | 2.41E-03 |
| 823 | NBEAL1       | 65065  | A_32_P433912_riset1       | 2.42E-03 |
| 824 | PPM1B        | 5495   | A_23_P209269_riset1       | 2.42E-03 |
| 825 | TRAF2        | 7186   | TRAF2_riset2              | 2.43E-03 |
| 826 | SIRPA        | 140885 | A_24_P267619_riset1       | 2.43E-03 |
| 827 | BCL2L2       | 599    | A_23_P418373_riset1       | 2.44E-03 |
| 828 | HCG9         | 10255  | A_23_P251021_riset1       | 2.46E-03 |
| 829 | NSUN5        | 55695  | A_23_P251505_riset1       | 2.47E-03 |
| 830 | HERPUD1      | 9709   | A_23_P54846_riset1        | 2.48E-03 |
| 831 | SOCS3        | 9021   | A_23_P207058_riset1       | 2.48E-03 |

|     |          |        |                           |          |
|-----|----------|--------|---------------------------|----------|
| 832 | TRAF6    | 7189   | TRAF6_riset2              | 2.48E-03 |
| 833 | GPR120   | 338557 | A_24_P129588_riset1       | 2.50E-03 |
| 834 | PCCA     | 5095   | MIL_PPPID400032837_riset1 | 2.50E-03 |
| 835 | HOXB6    | 3216   | A_23_P66682_riset1        | 2.54E-03 |
| 836 | TPST2    | 8459   | A_23_P132226_riset1       | 2.54E-03 |
| 837 | CENPJ    | 55835  | A_32_P219116_riset1       | 2.55E-03 |
| 838 | IL7      | 3574   | A_23_P8961_riset1         | 2.55E-03 |
| 839 | CD37     | 951    | A_24_P82749_riset1        | 2.55E-03 |
| 840 | PROCR    | 10544  | A_23_P80040_riset1        | 2.56E-03 |
| 841 | TMEM30B  | 161291 | A_32_P129752_riset1       | 2.56E-03 |
| 842 | ADAM28   | 10863  | A_23_P10356_riset1        | 2.57E-03 |
| 843 | CNN1     | 1264   | A_23_P16239_riset1        | 2.57E-03 |
| 844 | GCLC     | 2729   | A_23_P145114_riset1       | 2.57E-03 |
| 845 | AA789123 | -      | A_32_P485325_riset1       | 2.58E-03 |
| 846 | FYCO1    | 79443  | A_23_P212339_riset1       | 2.59E-03 |
| 847 | NFATC3   | 4775   | A_24_P373312_riset1       | 2.60E-03 |
| 848 | ZNF606   | 80095  | A_23_P4628_riset1         | 2.60E-03 |
| 849 | MARVELD3 | 91862  | A_23_P376372_riset1       | 2.60E-03 |
| 850 | WNK1     | 65125  | A_24_P51127_riset1        | 2.60E-03 |
| 851 | GUSB     | 2990   | GUSB_riset2               | 2.62E-03 |
| 852 | IL1RN    | 3557   | A_23_P209990_riset1       | 2.62E-03 |
| 853 | CHI3L2   | 1117   | A_23_P12082_riset1        | 2.62E-03 |
| 854 | PTPN18   | 26469  | A_24_P80135_riset1        | 2.62E-03 |
| 855 | SLC14A1  | 6563   | A_23_P38757_riset1        | 2.63E-03 |
| 856 | LHFPL1   | 340596 | A_23_P327499_riset1       | 2.66E-03 |
| 857 | LONRF1   | 91694  | A_32_P194032_riset1       | 2.67E-03 |
| 858 | DEPDC1   | 55635  | A_24_P25872_riset1        | 2.70E-03 |
| 859 | PPP1R15A | 23645  | A_23_P90172_riset1        | 2.71E-03 |
| 860 | ICA1L    | 130026 | MIL_PPPID399200186_riset1 | 2.72E-03 |
| 861 | PBK      | 55872  | A_23_P82699_riset1        | 2.74E-03 |
| 862 | AL036662 | -      | MIL_PPPID400032800_riset1 | 2.75E-03 |
| 863 | SV2C     | 22987  | MIL_PPPID399200154_riset1 | 2.76E-03 |
| 864 | BM806490 | -      | A_32_P18448_riset1        | 2.76E-03 |
| 865 | ASS1     | 445    | A_23_P31922_riset1        | 2.76E-03 |
| 866 | PPP2R5C  | 5527   | MIL_PPPID397416279_riset1 | 2.77E-03 |

|     |           |        |                           |          |
|-----|-----------|--------|---------------------------|----------|
| 867 | KIAA1754  | 85450  | A_23_P340333_riset1       | 2.78E-03 |
| 868 | FUT7      | 2529   | A_23_P170534_riset1       | 2.79E-03 |
| 869 | LOC205251 | 202051 | A_24_P220897_riset1       | 2.79E-03 |
| 870 | HMG3      | 9324   | A_23_P134047_riset1       | 2.80E-03 |
| 871 | B3GNT1    | 11041  | A_23_P86900_riset1        | 2.80E-03 |
| 872 | DDX17     | 10521  | MIL_PPPID399200270_riset1 | 2.81E-03 |
| 873 | NECAP2    | 55707  | A_23_P97296_riset1        | 2.82E-03 |
| 874 | PPM1A     | 5494   | A_24_P407323_riset1       | 2.82E-03 |
| 875 | CRK       | 1398   | CRK_riset2                | 2.82E-03 |
| 876 | LEUTX     | 342900 | A_24_P796321_riset1       | 2.83E-03 |
| 877 | ENPP2     | 5168   | A_23_P94333_riset1        | 2.83E-03 |
| 878 | ZFP14     | 57677  | A_24_P186342_riset1       | 2.84E-03 |
| 879 | ZNF789    | 285989 | A_32_P542928_riset1       | 2.84E-03 |
| 880 | MITF      | 4286   | A_23_P426663_riset1       | 2.85E-03 |
| 881 | HGD       | 3081   | A_23_P250164_riset1       | 2.85E-03 |
| 882 | C17ORF39  | 79018  | A_23_P164427_riset1       | 2.89E-03 |
| 883 | NUSAP1    | 51203  | A_24_P416079_riset2       | 2.89E-03 |
| 884 | HOXB3     | 3213   | A_24_P399220_riset1       | 2.94E-03 |
| 885 | STAMBPL1  | 57559  | A_23_P385322_riset1       | 2.95E-03 |
| 886 | ADA       | 100    | A_23_P210482_riset1       | 2.97E-03 |
| 887 | GZMM      | 3004   | A_23_P130835_riset1       | 3.01E-03 |
| 888 | PPIC      | 5480   | A_23_P84018_riset1        | 3.02E-03 |
| 889 | ALDH5A1   | 7915   | A_24_P923353_riset1       | 3.04E-03 |
| 890 | ATF4      | 468    | ATF4_riset2_piqor         | 3.05E-03 |
| 891 | C1ORF19   | 116461 | A_23_P104022_riset1       | 3.05E-03 |
| 892 | SP100     | 6672   | MIL_PPPID397416199_riset1 | 3.07E-03 |
| 893 | SLC26A2   | 1836   | A_23_P250951_riset1       | 3.08E-03 |
| 894 | RBBP6     | 5930   | A_23_P363206_riset1       | 3.09E-03 |
| 895 | CD180     | 4064   | A_23_P257815_riset1       | 3.09E-03 |
| 896 | CCL5      | 6352   | A_23_P152837_riset1       | 3.09E-03 |
| 897 | IL18      | 3606   | A_23_P104798_riset1       | 3.10E-03 |
| 898 | PLSCR1    | 5359   | A_23_P69109_riset1        | 3.11E-03 |
| 899 | SEH1L     | 81929  | A_24_P407930_riset1       | 3.12E-03 |
| 900 | POLR1B    | 84172  | MIL_PPPID394307972_riset1 | 3.16E-03 |
| 901 | RTN4IP1   | 84816  | A_23_P122775_riset1       | 3.17E-03 |

|     |                                                 |        |                           |          |
|-----|-------------------------------------------------|--------|---------------------------|----------|
| 902 | HLCS                                            | 3141   | A_23_P304991_riset1       | 3.17E-03 |
| 903 | FAHD1                                           | 81889  | MIL_PPPID394453514_riset1 | 3.17E-03 |
| 904 | STK24                                           | 8428   | MIL_PPPID399200194_riset1 | 3.17E-03 |
| 905 | KIAA1618                                        | 57714  | A_24_P350124_riset1       | 3.18E-03 |
| 906 | W86478                                          | -      | MIL_PPPID400032829_riset1 | 3.19E-03 |
| 907 | AF088076                                        | -      | A_24_P828496_riset1       | 3.19E-03 |
| 908 | ITGA2B                                          | 3674   | A_23_P77971_riset1        | 3.20E-03 |
| 909 | GTPBP4                                          | 23560  | A_23_P12874_riset1        | 3.21E-03 |
| 910 | C6ORF62                                         | 81688  | A_23_P422222_riset1       | 3.22E-03 |
| 911 | AK124263                                        | -      | A_24_P538708_riset1       | 3.26E-03 |
| 912 | ARMTL1                                          | 441549 | A_24_P93309_riset1        | 3.27E-03 |
| 913 | HLTF_intron_retention_between_exon25_and_exon26 | 6596   | MIL_PPPID394307747_riset1 | 3.28E-03 |
| 914 | T79183                                          | -      | A_24_P536974_riset1       | 3.29E-03 |
| 915 | ZNF12                                           | 7559   | A_23_P31335_riset1        | 3.29E-03 |
| 916 | ICAM1                                           | 3383   | A_23_P153320_riset1       | 3.30E-03 |
| 917 | PSMD14                                          | 10213  | A_23_P165691_riset1       | 3.30E-03 |
| 918 | AK024681                                        | -      | A_24_P513262_riset1       | 3.31E-03 |
| 919 | HSP90AA1                                        | 3320   | A_23_P162866_riset2       | 3.31E-03 |
| 920 | EEF1D                                           | 1936   | MIL_PPPID399806184_riset1 | 3.37E-03 |
| 921 | MTCO3                                           | 4514   | MTCO3_riset2              | 3.38E-03 |
| 922 | C6ORF166                                        | 55122  | A_23_P428819_riset1       | 3.39E-03 |
| 923 | MT1E                                            | 4493   | MIL_PPPID399806219_riset1 | 3.41E-03 |
| 924 | ABCD3                                           | 5825   | A_23_P74790_riset1        | 3.41E-03 |
| 925 | ZNF229                                          | 7772   | A_23_P130509_riset1       | 3.42E-03 |
| 926 | CARD6                                           | 84674  | A_23_P41854_riset1        | 3.43E-03 |
| 927 | GZMB                                            | 3002   | A_23_P117602_riset1       | 3.43E-03 |
| 928 | COL6A2                                          | 1292   | MIL_PPPID394307828_riset1 | 3.44E-03 |
| 929 | IL2RA                                           | 3559   | A_23_P127288_riset1       | 3.45E-03 |
| 930 | IL1RL2                                          | 8808   | A_23_P56604_riset1        | 3.45E-03 |
| 931 | PAICS                                           | 10606  | A_24_P200427_riset1       | 3.46E-03 |
| 932 | HNRNPR                                          | 10236  | A_23_P45726_riset1        | 3.48E-03 |
| 933 | LOC642897                                       | 642897 | A_24_P84401_riset1        | 3.48E-03 |
| 934 | TOLLIP                                          | 54472  | TOLLIP_riset2             | 3.49E-03 |

|     |                 |                    |                           |          |
|-----|-----------------|--------------------|---------------------------|----------|
| 935 | HCG_198546<br>9 | 388524;389672;3921 | MIL_PPPID399806188_riset1 | 3.49E-03 |
| 936 | MGST1           | 4257               | A_23_P36658_riset1        | 3.49E-03 |
| 937 | ACACB           | 32                 | A_23_P87791_riset1        | 3.50E-03 |
| 938 | GGPS1           | 9453               | MIL_PPPID394308008_riset1 | 3.50E-03 |
| 939 | RUNX1           | 861                | A_24_P96403_riset1        | 3.51E-03 |
| 940 | PSMA3           | 5684               | MIL_PPPID402610696_riset2 | 3.53E-03 |
| 941 | SRM             | 6723               | A_23_P74269_riset1        | 3.54E-03 |
| 942 | SDCCAG3         | 10807              | A_23_P258272_riset1       | 3.55E-03 |
| 943 | POLR3B          | 55703              | A_23_P87732_riset1        | 3.56E-03 |
| 944 | PDLIM5          | 10611              | A_24_P24263_riset1        | 3.57E-03 |
| 945 | CEP110          | 11064              | A_23_P43580_riset1        | 3.57E-03 |
| 946 | AI218358        | -                  | A_32_P60429_riset1        | 3.58E-03 |
| 947 | IL11RA          | 3590               | A_23_P71867_riset1        | 3.59E-03 |
| 948 | C1QA            | 712                | C1QA_riset2_piqor         | 3.59E-03 |
| 949 | VIPR1           | 7433               | A_24_P105933_riset1       | 3.61E-03 |
| 950 | DSC2            | 1824               | A_23_P4494_riset1         | 3.62E-03 |
| 951 | FARP2           | 9855               | A_24_P268474_riset1       | 3.63E-03 |
| 952 | S100A11         | 6282               | A_23_P126594_riset1       | 3.64E-03 |
| 953 | EIF2C2          | 27161              | A_23_P112159_riset1       | 3.66E-03 |
| 954 | ACSS2           | 55902              | MIL_PPPID394307920_riset1 | 3.66E-03 |
| 955 | QPCT            | 25797              | A_24_P71468_riset1        | 3.68E-03 |
| 956 | FN1             | 2335               | A_24_P119745_riset1       | 3.69E-03 |
| 957 | TBC1D23         | 55773              | A_23_P121489_riset1       | 3.70E-03 |
| 958 | PTF1A           | 256297             | A_23_P428329_riset1       | 3.70E-03 |
| 959 | CLCN5           | 1184               | CLCN5_riset2              | 3.71E-03 |
| 960 | HPRT1           | 3251               | HPRT_riset2_rtprcr        | 3.72E-03 |
| 961 | FAM26F          | 441168             | A_23_P7827_riset1         | 3.74E-03 |
| 962 | BC007917        | -                  | A_24_P300610_riset1       | 3.74E-03 |
| 963 | KIAA1524        | 57650              | A_24_P351466_riset1       | 3.74E-03 |
| 964 | AP2B1           | 163                | A_24_P253827_riset1       | 3.75E-03 |
| 965 | RGS12           | 6002               | A_24_P33705_riset1        | 3.77E-03 |
| 966 | FOXO4           | 4303               | FOXO4_riset2_piqor        | 3.78E-03 |
| 967 | SMAD7           | 4092               | A_23_P55518_riset1        | 3.79E-03 |
| 968 | INS             | 3630               | A_23_P1981_riset1         | 3.80E-03 |
| 969 | RFX5            | 5993               | A_24_P20032_riset1        | 3.81E-03 |



|      |                 |            |                           |          |
|------|-----------------|------------|---------------------------|----------|
| 970  | AVP             | 551        | A_23_P109133_riset1       | 3.84E-03 |
| 971  | SCYL2           | 55681      | A_23_P204550_riset1       | 3.84E-03 |
| 972  | ABCA1           | 19         | A_24_P289265_riset1       | 3.84E-03 |
| 973  | ZNF175          | 7728       | A_24_P916266_riset1       | 3.85E-03 |
| 974  | HLA-DMB         | 3109       | A_23_P389924_riset1       | 3.86E-03 |
| 975  | TGFB3           | 7043       | A_23_P88404_riset1        | 3.86E-03 |
| 976  | ARSB            | 411        | MIL_PPPID394453526_riset1 | 3.86E-03 |
| 977  | HLA-DMA         | 3108       | A_23_P42304_riset1        | 3.87E-03 |
| 978  | C3ORF68         | 152100     | A_24_P408740_riset1       | 3.88E-03 |
| 979  | GDF6            | 392255     | A_32_P140489_riset1       | 3.89E-03 |
| 980  | BCL3            | 602        | A_23_P4662_riset1         | 3.90E-03 |
| 981  | FYTTD1          | 84248      | A_23_P80827_riset1        | 3.91E-03 |
| 982  | LOC126917       | 121906     | A_32_P537218_riset1       | 3.91E-03 |
| 983  | IL2RG           | 3561       | A_23_P148464_riset1       | 3.92E-03 |
| 984  | TXNRD3          | 114112     | A_32_P170925_riset1       | 3.92E-03 |
| 985  | LIG4            | 3981       | A_23_P25581_riset1        | 3.94E-03 |
| 986  | RUNX3           | 864        | A_23_P51231_riset1        | 3.94E-03 |
| 987  | TRIP6           | 7205       | A_23_P252128_riset1       | 3.97E-03 |
| 988  | CSK             | 1445       | CSK_riset2                | 3.97E-03 |
| 989  | ANPEP           | 290        | A_23_P88621_riset1        | 3.97E-03 |
| 990  | CLEC11A         | 6320       | A_23_P153489_riset1       | 4.04E-03 |
| 991  | MAK10           | 60560      | A_24_P309264_riset1       | 4.05E-03 |
| 992  | DIRC2           | 84925      | A_23_P80778_riset1        | 4.06E-03 |
| 993  | F2              | 2147       | A_32_P514031_riset1       | 4.06E-03 |
| 994  | PEX1            | 5189       | A_23_P20045_riset1        | 4.07E-03 |
| 995  | MYT1;PCMT<br>D2 | 4661;55251 | A_23_P210829_riset1       | 4.07E-03 |
| 996  | CASP8           | 841        | CASP8_riset2              | 4.07E-03 |
| 997  | CMIP            | 80790      | A_23_P371239_riset1       | 4.08E-03 |
| 998  | WDR23           | 80344      | A_24_P326957_riset1       | 4.08E-03 |
| 999  | CFLAR           | 8837       | CFLAR_riset2_piqor        | 4.09E-03 |
| 1000 | TOX             | 9760       | A_24_P226755_riset1       | 4.10E-03 |
| 1001 | LTBR            | 4055       | A_23_P53557_riset1        | 4.12E-03 |
| 1002 | AK021551        | -          | A_24_P621853_riset1       | 4.13E-03 |
| 1003 | MAK             | 4117       | A_24_P363278_riset1       | 4.13E-03 |
| 1004 | PTPN7           | 5778       | PTPN7_riset2              | 4.15E-03 |

|      |                |             |                           |          |
|------|----------------|-------------|---------------------------|----------|
| 1005 | THC2317952     | -           | A_32_P164393_riset1       | 4.18E-03 |
| 1006 | LGMN           | 5641        | A_23_P25994_riset1        | 4.19E-03 |
| 1007 | PPP1R3F        | 89801       | A_23_P125541_riset1       | 4.23E-03 |
| 1008 | TIMP1          | 7076        | A_23_P62106_riset1        | 4.23E-03 |
| 1009 | RCAN2          | 10231       | MIL_PPPID394307944_riset1 | 4.23E-03 |
| 1010 | GSTA2          | 2939        | MIL_PPPID399806224_riset1 | 4.24E-03 |
| 1011 | SMARCC2        | 6601        | A_23_P128073_riset1       | 4.25E-03 |
| 1012 | ARRDC3         | 57561       | A_24_P414553_riset1       | 4.26E-03 |
| 1013 | MCEE           | 84693       | A_23_P56654_riset1        | 4.26E-03 |
| 1014 | GBP2           | 2634        | A_23_P85693_riset1        | 4.29E-03 |
| 1015 | FLT3LG         | 2323        | A_23_P78742_riset1        | 4.31E-03 |
| 1016 | NRD1           | 4898        | A_24_P746650_riset1       | 4.32E-03 |
| 1017 | UFM1           | 51569       | A_23_P99465_riset1        | 4.32E-03 |
| 1018 | SURF6          | 6838        | A_24_P21447_riset1        | 4.33E-03 |
| 1019 | CNTN5          | 53942       | A_23_P503059_riset1       | 4.34E-03 |
| 1020 | CSF2RA         | 1438        | A_23_P136174_riset1       | 4.34E-03 |
| 1021 | IGF2           | 3481        | MIL_PPPID397416219_riset1 | 4.35E-03 |
| 1022 | F8             | 2157        | A_24_P314451_riset1       | 4.36E-03 |
| 1023 | BIN2           | 51411       | A_23_P162386_riset1       | 4.38E-03 |
| 1024 | COPS4          | 51138       | COPS4_riset2              | 4.39E-03 |
| 1025 | VDAC3          | 7419        | A_23_P60069_riset1        | 4.40E-03 |
| 1026 | AK000992       | -           | A_32_P29083_riset1        | 4.40E-03 |
| 1027 | S100A8         | 6279        | A_23_P434809_riset1       | 4.41E-03 |
| 1028 | GPR174         | 84636       | A_23_P11070_riset1        | 4.42E-03 |
| 1029 | TNFSF10        | 8743        | A_23_P121253_riset1       | 4.42E-03 |
| 1030 | HOXB5          | 3215        | A_23_P363316_riset1       | 4.43E-03 |
| 1031 | TLR8           | 51311       | A_23_P73837_riset1        | 4.43E-03 |
| 1032 | CUGBP1         | 10658       | A_23_P318396_riset1       | 4.46E-03 |
| 1033 | ENTPD1         | 953         | MIL_PPPID394453405_riset1 | 4.48E-03 |
| 1034 | FBLN1          | 2192        | A_23_P433016_riset1       | 4.48E-03 |
| 1035 | FOXJ1          | 2302        | A_23_P348636_riset1       | 4.48E-03 |
| 1036 | PGM2L1         | 283209      | A_32_P122703_riset1       | 4.49E-03 |
| 1037 | FLJ14213       | 79899       | A_23_P116512_riset1       | 4.54E-03 |
| 1038 | MAPK1IP1L      | 93487       | A_24_P107674_riset1       | 4.57E-03 |
| 1039 | RNF4;LOC644006 | 6047;644006 | MIL_PPPID397416195_riset1 | 4.57E-03 |

|      |                       |                 |                           |          |
|------|-----------------------|-----------------|---------------------------|----------|
| 1040 | FASTKD1               | 79675           | A_23_P307624_riset1       | 4.58E-03 |
| 1041 | C10ORF2               | 56652           | A_24_P258073_riset1       | 4.58E-03 |
| 1042 | SF3B1                 | 23451           | A_32_P31633_riset1        | 4.58E-03 |
| 1043 | IL17RA                | 23765           | IL17RA_riset2             | 4.59E-03 |
| 1044 | THC2315602            | -               | A_32_P65067_riset1        | 4.59E-03 |
| 1045 | GGTLA4                | 92086           | A_23_P57199_riset1        | 4.60E-03 |
| 1046 | C1ORF21               | 81563           | A_24_P173754_riset1       | 4.60E-03 |
| 1047 | MCM3AP;M<br>CM3APAS   | 114044;8888     | A_23_P120744_riset1       | 4.61E-03 |
| 1048 | MAP2K6                | 5608            | A_23_P207445_riset1       | 4.61E-03 |
| 1049 | GEMIN4                | 50628           | A_23_P66867_riset1        | 4.63E-03 |
| 1050 | CNKS3                 | 154043          | A_23_P134085_riset1       | 4.66E-03 |
| 1051 | TTY8;LOC1<br>00101118 | 100101118;84673 | A_23_P45592_riset1        | 4.7E-03  |
| 1052 | C11ORF48              | 79081           | A_23_P1944_riset1         | 4.7E-03  |
| 1053 | C20ORF117             | 140710          | A_23_P5936_riset1         | 4.7E-03  |
| 1054 | MXD4                  | 10608           | A_24_P234732_riset1       | 4.7E-03  |
| 1055 | EDG4                  | 9170            | A_23_P101829_riset1       | 4.7E-03  |
| 1056 | SC5DL                 | 6309            | A_32_P41026_riset1        | 4.7E-03  |
| 1057 | TRAT1                 | 50852           | A_23_P212568_riset1       | 4.7E-03  |
| 1058 | PEX5                  | 5830            | A_23_P48246_riset1        | 4.7E-03  |
| 1059 | A_24_P24415           | -               | A_24_P24415_riset1        | 4.7E-03  |
| 1060 | SREBF1                | 6720            | SREBF1_riset2             | 4.7E-03  |
| 1061 | NOP5/NOP58            | 51602           | A_23_P154447_riset1       | 4.7E-03  |
| 1062 | FPRL1                 | 2358            | A_23_P55649_riset1        | 4.8E-03  |
| 1063 | CRAT                  | 1384            | A_23_P32199_riset1        | 4.8E-03  |
| 1064 | PRO2964               | 55415           | A_23_P430156_riset1       | 4.8E-03  |
| 1065 | FLJ14327              | 79972           | A_23_P377935_riset1       | 4.8E-03  |
| 1066 | OBFC1                 | 79991           | A_23_P46852_riset1        | 4.8E-03  |
| 1067 | TESK1                 | 7016            | A_23_P169178_riset1       | 4.8E-03  |
| 1068 | CD86                  | 942             | A_24_P131589_riset1       | 4.8E-03  |
| 1069 | C21ORF33              | 8209            | A_23_P109333_riset1       | 4.9E-03  |
| 1070 | BE348404              | -               | A_32_P396516_riset1       | 4.9E-03  |
| 1071 | THC2375612            | -               | A_32_P144999_riset1       | 4.9E-03  |
| 1072 | MYC                   | 4609            | MIL_PPPID404158649_riset2 | 4.9E-03  |
| 1073 | THC2404892            | -               | A_32_P200120_riset1       | 4.9E-03  |

|      |                     |              |                           |         |
|------|---------------------|--------------|---------------------------|---------|
| 1074 | RET                 | 5979         | MIL_PPPID397416187_riset1 | 4.9E-03 |
| 1075 | ZFP2                | 80108        | A_23_P133359_riset1       | 4.9E-03 |
| 1076 | IRAK1               | 3654         | IRAK1_riset2              | 5.0E-03 |
| 1077 | TNIK                | 23043        | A_24_P350576_riset1       | 5.0E-03 |
| 1078 | PLA2G4C             | 8605         | A_23_P50508_riset1        | 5.0E-03 |
| 1079 | LGALS3              | 3958         | A_23_P128919_riset2       | 5.0E-03 |
| 1080 | FBP2                | 8789         | A_23_P94472_riset1        | 5.1E-03 |
| 1081 | TINF2               | 26277        | A_23_P77020_riset1        | 5.1E-03 |
| 1082 | KIDINS220           | 57498        | A_24_P97145_riset1        | 5.1E-03 |
| 1083 | RAP1GDS1            | 5910         | A_23_P58207_riset1        | 5.1E-03 |
| 1084 | MAP4K5              | 11183        | A_23_P205646_riset1       | 5.1E-03 |
| 1085 | KLRC1               | 3821         | A_23_P139654_riset1       | 5.1E-03 |
| 1086 | SLC11A1             | 6556         | A_32_P436132_riset1       | 5.1E-03 |
| 1087 | AUTS2               | 26053        | A_32_P809435_riset1       | 5.2E-03 |
| 1088 | SNRPC               | 6631         | A_23_P59192_riset1        | 5.2E-03 |
| 1089 | ZBTB32              | 27033        | A_23_P131024_riset1       | 5.2E-03 |
| 1090 | C22ORF16            | 400916       | MIL_PPPID399200262_riset1 | 5.2E-03 |
| 1091 | THC2376224          | -            | A_23_P165541_riset1       | 5.2E-03 |
| 1092 | PHLDB2              | 90102        | A_24_P240166_riset1       | 5.2E-03 |
| 1093 | STOML2              | 30968        | A_23_P256497_riset1       | 5.2E-03 |
| 1094 | KIAA0776            | 23376        | A_23_P30956_riset1        | 5.2E-03 |
| 1095 | SDC1                | 6382         | SDC1_riset2               | 5.2E-03 |
| 1096 | TYW1                | 55253        | A_24_P883109_riset1       | 5.2E-03 |
| 1097 | EPOR                | 2057         | A_23_P381954_riset1       | 5.2E-03 |
| 1098 | DPYS                | 1807         | A_23_P20303_riset1        | 5.3E-03 |
| 1099 | FKBP1B              | 2281         | A_23_P142631_riset1       | 5.3E-03 |
| 1100 | LOC400566           | 400566       | A_24_P624439_riset1       | 5.3E-03 |
| 1101 | LILRB1              | 10859        | LILRB1_riset2             | 5.3E-03 |
| 1102 | LGALS8              | 3964         | LGALS8_riset2             | 5.3E-03 |
| 1103 | CLEC3B              | 7123         | A_23_P69497_riset1        | 5.3E-03 |
| 1104 | IQCE                | 23288        | A_24_P266285_riset1       | 5.3E-03 |
| 1105 | NFE2L2              | 4780         | A_23_P5761_riset1         | 5.3E-03 |
| 1106 | CDCA3;LOC<br>285636 | 285636;83461 | A_23_P416801_riset1       | 5.3E-03 |
| 1107 | EPSTI1              | 94240        | A_23_P105794_riset1       | 5.4E-03 |
| 1108 | C11ORF24            | 53838        | A_23_P12911_riset1        | 5.4E-03 |

|      |                   |            |                           |         |
|------|-------------------|------------|---------------------------|---------|
| 1109 | BCCIP             | 56647      | A_24_P30206_riset1        | 5.4E-03 |
| 1110 | R3HDM1            | 23518      | A_23_P380998_riset1       | 5.4E-03 |
| 1111 | SRRM2             | 23524      | A_24_P50988_riset1        | 5.4E-03 |
| 1112 | UBD               | 10537      | A_23_P81898_riset1        | 5.4E-03 |
| 1113 | NPTN              | 27020      | A_23_P37598_riset1        | 5.5E-03 |
| 1114 | FNBP4             | 23360      | A_23_P395595_riset1       | 5.5E-03 |
| 1115 | SLC30A4           | 7782       | A_32_P21255_riset1        | 5.5E-03 |
| 1116 | TBRG1             | 84897      | A_23_P98463_riset1        | 5.5E-03 |
| 1117 | LHCGR;C6O<br>RF62 | 3973;81688 | A_24_P209204_riset1       | 5.5E-03 |
| 1118 | HSPB7             | 27129      | A_23_P103703_riset1       | 5.5E-03 |
| 1119 | KRT72             | 140807     | A_32_P48825_riset2        | 5.5E-03 |
| 1120 | PEX7              | 5191       | A_23_P93543_riset1        | 5.5E-03 |
| 1121 | GSN               | 2934       | A_23_P255884_riset1       | 5.5E-03 |
| 1122 | AK3L1             | 205        | MIL_PPPID394453462_riset1 | 5.6E-03 |
| 1123 | ITGA9             | 3680       | ITGA9_riset2              | 5.6E-03 |
| 1124 | RNASET2           | 8635       | A_24_P360269_riset1       | 5.6E-03 |
| 1125 | OSTF1             | 26578      | OSTF1_riset2_piqor        | 5.6E-03 |
| 1126 | FBXW8             | 26259      | A_24_P44279_riset1        | 5.6E-03 |
| 1127 | SKI               | 6497       | SKI_riset2                | 5.6E-03 |
| 1128 | PDCD7             | 10081      | A_24_P159181_riset1       | 5.6E-03 |
| 1129 | ARHGAP17          | 55114      | A_23_P15113_riset1        | 5.6E-03 |
| 1130 | KIAA0586          | 9786       | A_23_P106127_riset1       | 5.7E-03 |
| 1131 | ITGAL             | 3683       | A_23_P206806_riset1       | 5.7E-03 |
| 1132 | RPS4Y1            | 6192       | A_23_P259314_riset1       | 5.7E-03 |
| 1133 | ECHS1             | 1892       | A_23_P104362_riset1       | 5.7E-03 |
| 1134 | SLC2A9            | 56606      | A_24_P563745_riset1       | 5.7E-03 |
| 1135 | HSPA4             | 3308       | A_24_P377269_riset1       | 5.7E-03 |
| 1136 | COL7A1            | 1294       | COL7A1_riset2             | 5.7E-03 |
| 1137 | CBLB              | 868        | A_23_P212715_riset1       | 5.7E-03 |
| 1138 | YPEL1             | 29799      | A_32_P88120_riset1        | 5.7E-03 |
| 1139 | C21ORF122         | 728039     | A_23_P143514_riset1       | 5.7E-03 |
| 1140 | FANCG             | 2189       | A_23_P71644_riset1        | 5.8E-03 |
| 1141 | RASSF7            | 8045       | A_23_P52589_riset1        | 5.8E-03 |
| 1142 | OTUD7A            | 161725     | A_23_P3413_riset1         | 5.8E-03 |
| 1143 | KIAA1109          | 84162      | A_23_P147869_riset1       | 5.8E-03 |

|      |               |             |                           |         |
|------|---------------|-------------|---------------------------|---------|
| 1144 | MRAS          | 22808       | A_24_P88850_riset1        | 5.8E-03 |
| 1145 | IGF2;INS-IGF2 | 3481;723961 | A_23_P150609_riset1       | 5.8E-03 |
| 1146 | TNFSF13B      | 10673       | A_23_P14174_riset1        | 5.8E-03 |
| 1147 | S100A9        | 6280        | A_23_P23044_riset1        | 5.9E-03 |
| 1148 | LGR6          | 59352       | A_23_P23834_riset1        | 5.9E-03 |
| 1149 | PLK4          | 10733       | A_23_P155968_riset1       | 5.9E-03 |
| 1150 | STAT1         | 6772        | MIL_PPPID394307872_riset1 | 5.9E-03 |
| 1151 | PLEKHA4       | 57664       | A_24_P408047_riset1       | 5.9E-03 |
| 1152 | MFI2          | 4241        | MFI2_riset2_piqor         | 6.0E-03 |
| 1153 | MBNL1         | 4154        | A_23_P357811_riset1       | 6.1E-03 |
| 1154 | MORF4L1       | 10933       | A_24_P398898_riset1       | 6.1E-03 |
| 1155 | FABP4         | 2167        | A_23_P8820_riset1         | 6.1E-03 |
| 1156 | CD200R1       | 131450      | MIL_PPPID399200246_riset1 | 6.1E-03 |
| 1157 | UTP15         | 84135       | A_23_P213441_riset1       | 6.1E-03 |
| 1158 | IFNA4         | 3441        | IFNA4_riset2              | 6.1E-03 |
| 1159 | FCRL3         | 115352      | A_23_P358438_riset1       | 6.1E-03 |
| 1160 | ARL11         | 115761      | A_32_P902957_riset1       | 6.2E-03 |
| 1161 | NFIL3         | 4783        | A_23_P32253_riset1        | 6.2E-03 |
| 1162 | ITGB7         | 3695        | ITGB7_riset2_piqor        | 6.2E-03 |
| 1163 | BCL2L1        | 598         | A_23_P210886_riset1       | 6.2E-03 |
| 1164 | CFL2          | 1073        | A_24_P373152_riset1       | 6.2E-03 |
| 1165 | TRAK2         | 66008       | A_23_P209426_riset1       | 6.2E-03 |
| 1166 | MGC24103      | 158295      | A_23_P373100_riset1       | 6.2E-03 |
| 1167 | MXI1          | 4601        | MIL_PPPID394307804_riset1 | 6.3E-03 |
| 1168 | CASP6         | 839         | CASP6_riset2              | 6.3E-03 |
| 1169 | SRGAP2P1      | 653464      | A_24_P357869_riset1       | 6.3E-03 |
| 1170 | WFDC2         | 10406       | A_23_P218675_riset1       | 6.3E-03 |
| 1171 | ZSCAN18       | 65982       | A_23_P55682_riset1        | 6.3E-03 |
| 1172 | GOT1          | 2805        | A_24_P81473_riset1        | 6.3E-03 |
| 1173 | UBQLN4        | 56893       | A_24_P239266_riset1       | 6.3E-03 |
| 1174 | MLL5          | 55904       | A_24_P411863_riset1       | 6.3E-03 |
| 1175 | AF038184      | -           | A_24_P566831_riset1       | 6.3E-03 |
| 1176 | H22954        | -           | A_32_P165504_riset1       | 6.3E-03 |
| 1177 | AK022086      | -           | A_24_P510047_riset1       | 6.3E-03 |
| 1178 | CITED4        | 163732      | A_32_P209230_riset1       | 6.3E-03 |

|      |                                         |               |                           |         |
|------|-----------------------------------------|---------------|---------------------------|---------|
| 1179 | NSUN5C                                  | 260294        | A_23_P82412_riset1        | 6.3E-03 |
| 1180 | FKBP9:FKBP9L                            | 11328;360132  | MIL_PPPID399200338_riset1 | 6.4E-03 |
| 1181 | LOC646301;LOC728417;LOC728728;LOC729021 | 645984        | A_24_P93720_riset1        | 6.4E-03 |
| 1182 | GPR92                                   | 57121         | A_23_P204375_riset1       | 6.4E-03 |
| 1183 | LOC642441;LOC727820;LOC730256;LOC730257 | 642413;644496 | A_24_P321184_riset1       | 6.4E-03 |
| 1184 | EPS8                                    | 2059          | A_23_P136347_riset1       | 6.4E-03 |
| 1185 | LOC646762                               | 646762        | A_24_P911310_riset1       | 6.5E-03 |
| 1186 | JMJD3                                   | 23135         | A_24_P942630_riset1       | 6.5E-03 |
| 1187 | PFKL                                    | 5211          | A_23_P29079_riset1        | 6.5E-03 |
| 1188 | SPTB                                    | 6710          | A_32_P134968_riset1       | 6.5E-03 |
| 1189 | EIF2S1                                  | 1965          | A_24_P356015_riset1       | 6.5E-03 |
| 1190 | PTX3                                    | 5806          | A_23_P121064_riset1       | 6.5E-03 |
| 1191 | THC2375527                              | -             | A_32_P110225_riset1       | 6.5E-03 |
| 1192 | DGAT2                                   | 84649         | A_24_P295791_riset1       | 6.6E-03 |
| 1193 | C13ORF33                                | 84935         | A_23_P99515_riset1        | 6.6E-03 |
| 1194 | ACAT1                                   | 38            | A_23_P24515_riset1        | 6.6E-03 |
| 1195 | MYBL1                                   | 4603          | A_24_P367227_riset1       | 6.6E-03 |
| 1196 | WFDC1                                   | 58189         | A_23_P106617_riset1       | 6.6E-03 |
| 1197 | KLHDC4                                  | 122773        | A_23_P422766_riset1       | 6.6E-03 |
| 1198 | MUC8                                    | 4590          | MUC8_riset2_piqor         | 6.7E-03 |
| 1199 | AKR1C1                                  | 1645          | MIL_PPPID399806218_riset1 | 6.7E-03 |
| 1200 | ADM                                     | 133           | A_23_P127948_riset1       | 6.7E-03 |
| 1201 | DGKA                                    | 1606          | DGKA_riset2               | 6.7E-03 |
| 1202 | KIAA1377                                | 57562         | A_32_P58614_riset1        | 6.7E-03 |
| 1203 | NFATC1                                  | 4772          | NFATC1_2_riset2           | 6.7E-03 |
| 1204 | BRD2                                    | 6046          | A_24_P307014_riset1       | 6.7E-03 |
| 1205 | AF116651                                | -             | A_23_P77192_riset1        | 6.8E-03 |
| 1206 | PDCD7                                   | 10081         | A_24_P159181_riset1       | 6.8E-03 |
| 1207 | CLEC5A                                  | 23601         | A_23_P71165_riset1        | 6.8E-03 |
| 1208 | DSTN                                    | 11034         | A_23_P408095_riset1       | 6.8E-03 |
| 1209 | GLT25D2                                 | 23127         | A_32_P86365_rev_riset1    | 6.8E-03 |
| 1210 | GLT25D2                                 | 23127         | A_32_P86365_rev_riset1    | 6.8E-03 |

|      |           |        |                           |         |
|------|-----------|--------|---------------------------|---------|
| 1211 | ASB7      | 140460 | A_23_P117743_riset1       | 6.8E-03 |
| 1212 | GPR114    | 221188 | A_23_P206290_riset1       | 6.8E-03 |
| 1213 | INDO      | 3620   | A_23_P112026_riset1       | 6.8E-03 |
| 1214 | SHKBP1    | 92799  | A_23_P130560_riset1       | 6.8E-03 |
| 1215 | CLEC4C    | 170482 | CLEC4C_riset2             | 6.9E-03 |
| 1216 | SSH1      | 54434  | A_23_P429560_riset1       | 6.9E-03 |
| 1217 | SFRP1     | 6422   | A_23_P10127_riset1        | 6.9E-03 |
| 1218 | SAE1      | 10055  | A_23_P16337_riset1        | 6.9E-03 |
| 1219 | FASLG     | 356    | A_23_P369815_riset1       | 6.9E-03 |
| 1220 | PDS5B     | 23047  | A_23_P48387_riset1        | 6.9E-03 |
| 1221 | TM7SF3    | 51768  | A_23_P47857_riset1        | 6.9E-03 |
| 1222 | WNT5A     | 7474   | A_32_P61903_riset1        | 6.9E-03 |
| 1223 | IL4R      | 3566   | IL4R_2_riset2             | 6.9E-03 |
| 1224 | BEST1     | 7439   | A_23_P104992_riset1       | 7.0E-03 |
| 1225 | LOC643008 | 643008 | A_32_P445010_riset1       | 7.0E-03 |
| 1226 | LITAF     | 9516   | A_23_P3532_riset1         | 7.1E-03 |
| 1227 | TPR       | 7175   | MIL_PPPID394453417_riset1 | 7.1E-03 |
| 1228 | PBX3      | 5090   | A_23_P71821_riset1        | 7.1E-03 |
| 1229 | ACTA2     | 59     | A_23_P150053_riset1       | 7.1E-03 |
| 1230 | PREPL     | 9581   | A_24_P943193_riset1       | 7.1E-03 |
| 1231 | CNOT2     | 4848   | CNOT2_riset2              | 7.1E-03 |
| 1232 | AK001118  | -      | A_32_P145385_riset1       | 7.1E-03 |
| 1233 | PITPNC1   | 26207  | A_23_P84189_riset1        | 7.2E-03 |
| 1234 | CASP3     | 836    | CASP3_riset2              | 7.2E-03 |
| 1235 | MIF       | 4282   | A_23_P91619_riset1        | 7.2E-03 |
| 1236 | C1QA      | 712    | C1QA_riset2_piqor         | 7.2E-03 |
| 1237 | C14ORF130 | 55148  | A_23_P205393_riset1       | 7.3E-03 |
| 1238 | CLSTN3    | 9746   | A_23_P53724_riset1        | 7.3E-03 |
| 1239 | BMPR2     | 659    | MIL_PPPID400032861_riset1 | 7.3E-03 |
| 1240 | C2ORF39   | 92749  | A_23_P308722_riset1       | 7.3E-03 |
| 1241 | PDCD5     | 9141   | A_23_P50608_riset1        | 7.3E-03 |
| 1242 | C15ORF42  | 90381  | A_32_P109296_riset1       | 7.4E-03 |
| 1243 | IER3      | 8870   | A_23_P42257_riset1        | 7.4E-03 |
| 1244 | HES1      | 3280   | A_23_P17998_riset1        | 7.4E-03 |
| 1245 | PIM1      | 5292   | PIM1_riset2               | 7.4E-03 |



|      |                                                                                   |                            |                           |         |
|------|-----------------------------------------------------------------------------------|----------------------------|---------------------------|---------|
| 1246 | RIMS3                                                                             | 9783                       | A_23_P319583_riset1       | 7.4E-03 |
| 1247 | HDLBP                                                                             | 3069                       | MIL_PPPID397416151_riset1 | 7.5E-03 |
| 1248 | A_24_P924118                                                                      | -                          | A_24_P924118_riset1       | 7.5E-03 |
| 1249 | RABGAP1                                                                           | 23637                      | A_24_P252575_riset1       | 7.6E-03 |
| 1250 | STAT3                                                                             | 6774                       | A_23_P100790_riset1       | 7.6E-03 |
| 1251 | CARD10                                                                            | 29775                      | A_23_P434890_riset1       | 7.6E-03 |
| 1252 | FNDC5                                                                             | 252995                     | A_23_P420326_riset1       | 7.6E-03 |
| 1253 | PIK3R1                                                                            | 5295                       | PIK3R1_riset2             | 7.6E-03 |
| 1254 | IL5RA                                                                             | 3568                       | A_23_P500676_riset1       | 7.6E-03 |
| 1255 | CPNE8                                                                             | 144402                     | A_24_P56240_riset1        | 7.6E-03 |
| 1256 | SAA1                                                                              | 6288                       | MIL_PPPID399806220_riset1 | 7.6E-03 |
| 1257 | PIR                                                                               | 8544                       | A_23_P137035_riset1       | 7.7E-03 |
| 1258 | AK021824                                                                          | -                          | A_32_P220233_riset1       | 7.7E-03 |
| 1259 | CUEDC1                                                                            | 55917                      | A_23_P318420_riset1       | 7.7E-03 |
| 1260 | NOTCH4                                                                            | 4855                       | A_23_P365614_riset1       | 7.8E-03 |
| 1261 | RAB32                                                                             | 10981                      | A_24_P303480_riset1       | 7.8E-03 |
| 1262 | OSBPL6                                                                            | 114880                     | A_23_P108823_riset1       | 7.9E-03 |
| 1263 | CD33                                                                              | 945                        | A_24_P301655_riset1       | 7.9E-03 |
| 1264 | AMMECR1                                                                           | 9949                       | A_32_P201773_riset1       | 7.9E-03 |
| 1265 | ELF5                                                                              | 2001                       | A_23_P13465_riset1        | 7.9E-03 |
| 1266 | GP9                                                                               | 2815                       | GP9_riset2                | 7.9E-03 |
| 1267 | NFATC2IP                                                                          | 84901                      | NFATC2IP_riset2           | 7.9E-03 |
| 1268 | NFAT5                                                                             | 10725                      | NFAT5_riset2              | 7.9E-03 |
| 1269 | AF085913                                                                          | -                          | A_24_P927166_riset1       | 7.9E-03 |
| 1270 | DKFZP547E087;LOC23117;LOC440345;LOC440354;LOC595101;LOC641298;LOC653786;LOC730099 | 91695                      | A_24_P365679_riset1       | 8.0E-03 |
| 1271 | ITGA8                                                                             | 8516                       | ITGA8_riset2_piqor        | 8.0E-03 |
| 1272 | BNIP3L                                                                            | 665                        | BNIP3L_riset2_piqor       | 8.0E-03 |
| 1273 | THC2385437                                                                        | -                          | A_32_P49054_riset1        | 8.0E-03 |
| 1274 | DKFZP547E087;LOC23117;LOC440345;LOC653786                                         | 23117;283846;440345;653786 | A_24_P290163_riset1       | 8.1E-03 |
| 1275 | NOLA1                                                                             | 54433                      | A_23_P58280_riset1        | 8.1E-03 |

|      |                     |              |                           |         |
|------|---------------------|--------------|---------------------------|---------|
| 1276 | SLC40A1             | 30061        | SLC40A1_riset2            | 8.1E-03 |
| 1277 | IL10                | 3586         | A_23_P126735_riset1       | 8.1E-03 |
| 1278 | ST3GAL6             | 10402        | A_23_P250800_riset1       | 8.1E-03 |
| 1279 | GK5                 | 256356       | A_24_P362805_riset1       | 8.1E-03 |
| 1280 | FRZB                | 2487         | FRZB_riset2_piqor         | 8.1E-03 |
| 1281 | FUK                 | 197258       | A_23_P429461_riset1       | 8.2E-03 |
| 1282 | GNPTAB              | 79158        | A_24_P281975_riset1       | 8.2E-03 |
| 1283 | FFAR2               | 2867         | A_23_P397391_riset1       | 8.3E-03 |
| 1284 | PYHIN1              | 149628       | A_23_P365834_riset1       | 8.3E-03 |
| 1285 | SLC16A7             | 9194         | A_32_P130630_riset1       | 8.3E-03 |
| 1286 | C2ORF37             | 80067        | A_23_P5481_riset1         | 8.3E-03 |
| 1287 | ITGB7               | 3695         | ITGB7_riset2_piqor        | 8.3E-03 |
| 1288 | NR4A1               | 3164         | A_23_P128230_riset1       | 8.4E-03 |
| 1289 | SLFN12              | 55106        | A_23_P118532_riset1       | 8.4E-03 |
| 1290 | KANK2               | 25959        | A_23_P50426_riset1        | 8.4E-03 |
| 1291 | IL1B                | 3553         | IL1B_riset2_piqor         | 8.4E-03 |
| 1292 | IWS1                | 55677        | A_23_P165566_riset1       | 8.5E-03 |
| 1293 | SMAD3               | 4088         | A_23_P48936_riset1        | 8.5E-03 |
| 1294 | NCOA1               | 8648         | NCOA1_riset2_piqor        | 8.5E-03 |
| 1295 | TRAF1               | 7185         | TRAF1_riset2              | 8.5E-03 |
| 1296 | UMOD                | 7369         | A_23_P158775_riset1       | 8.5E-03 |
| 1297 | TRIM34;TRIM6-TRIM34 | 445372;53840 | A_23_P124190_riset1       | 8.5E-03 |
| 1298 | AKR1C1;AKR1C2       | 1645;1646    | A_24_P220947_riset1       | 8.6E-03 |
| 1299 | RASSF4              | 83937        | A_24_P295590_riset1       | 8.6E-03 |
| 1300 | ADH6                | 130          | A_24_P25550_riset1        | 8.6E-03 |
| 1301 | CHCHD1              | 118487       | A_32_P51082_rev_riset1    | 8.6E-03 |
| 1302 | APBB1IP             | 54518        | A_23_P401700_riset1       | 8.7E-03 |
| 1303 | TNFRSF21            | 27242        | A_23_P30666_riset1        | 8.7E-03 |
| 1304 | MYBL1               | 4603         | A_24_P367227_riset1       | 8.7E-03 |
| 1305 | T75585              | -            | A_24_P536974_riset1       | 8.7E-03 |
| 1306 | RAB40C              | 57799        | A_24_P333357_riset1       | 8.8E-03 |
| 1307 | GTF2A2              | 2958         | MIL_PPPID400032817_riset1 | 8.8E-03 |
| 1308 | MCPH1               | 79648        | A_23_P84350_riset1        | 8.8E-03 |
| 1309 | PDILT               | 204474       | A_24_P70906_riset1        | 8.8E-03 |

|      |                                    |                          |                           |         |
|------|------------------------------------|--------------------------|---------------------------|---------|
| 1310 | APOM                               | 55937                    | A_23_P42265_riset1        | 8.8E-03 |
| 1311 | GPR123                             | 84435                    | A_32_P232437_riset1       | 8.8E-03 |
| 1312 | STAT4                              | 6775                     | STAT4_riset2_piqor        | 8.8E-03 |
| 1313 | B3GAT1                             | 27087                    | A_23_P1833_riset1         | 8.9E-03 |
| 1314 | SH3PXD2B                           | 285590                   | A_32_P24585_riset1        | 8.9E-03 |
| 1315 | TNFRSF9                            | 3604                     | A_23_P51936_riset1        | 9.0E-03 |
| 1316 | GRB2                               | 2885                     | GRB2_riset2_piqor         | 9.0E-03 |
| 1317 | CLIC3                              | 9022                     | A_23_P254654_riset1       | 9.0E-03 |
| 1318 | LYL1                               | 4066                     | A_23_P5281_riset1         | 9.0E-03 |
| 1319 | SLC11A1                            | 6556                     | A_32_P436132_riset1       | 9.0E-03 |
| 1320 | CREBL2                             | 1389                     | A_24_P56194_riset1        | 9.1E-03 |
| 1321 | IL17D                              | 53342                    | IL17D_riset2              | 9.1E-03 |
| 1322 | KIF5A                              | 3798                     | A_24_P227375_riset1       | 9.1E-03 |
| 1323 | OCLN;LOC64<br>7859                 | 4950;647859              | A_24_P102053_riset1       | 9.1E-03 |
| 1324 | TRIM43;LOC<br>643445;LOC6<br>53192 | 129868;643445;6531<br>92 | A_23_P17173_riset1        | 9.1E-03 |
| 1325 | ENTPD1                             | 953                      | MIL_PPPID394453405_riset1 | 9.1E-03 |
| 1326 | PPIL6                              | 285755                   | A_23_P111361_riset1       | 9.1E-03 |
| 1327 | CCDC37                             | 348807                   | A_23_P426153_riset1       | 9.1E-03 |
| 1328 | JUP                                | 3728                     | A_23_P501822_riset1       | 9.1E-03 |
| 1329 | ZFPL1                              | 7542                     | A_23_P98232_riset1        | 9.1E-03 |
| 1330 | SNX4                               | 8723                     | A_23_P72568_riset1        | 9.2E-03 |
| 1331 | HMGB1                              | 3146                     | A_23_P99980_riset1        | 9.2E-03 |
| 1332 | APOL6                              | 80830                    | A_24_P941167_riset1       | 9.2E-03 |
| 1333 | COPS2                              | 9318                     | COPS2_riset2              | 9.3E-03 |
| 1334 | IL1RAP                             | 3556                     | A_23_P336554_riset1       | 9.3E-03 |
| 1335 | SNAP23                             | 8773                     | A_23_P206177_riset1       | 9.3E-03 |
| 1336 | HLA-DRA                            | 3122                     | A_32_P87697_riset1        | 9.4E-03 |
| 1337 | TAF2                               | 6873                     | A_24_P385119_riset1       | 9.4E-03 |
| 1338 | LOC10012948<br>4_as                | 100129484                | A_32_P36905_riset1        | 9.4E-03 |
| 1339 | MMP25                              | 64386                    | MMP25_riset2              | 9.4E-03 |
| 1340 | FARS2                              | 10667                    | A_23_P33720_riset1        | 9.4E-03 |
| 1341 | COPS6                              | 10980                    | A_23_P8432_riset1         | 9.4E-03 |
| 1342 | BTBD7                              | 55727                    | A_24_P230808_riset1       | 9.4E-03 |
| 1343 | HNRNPU                             | 3192                     | A_32_P51894_riset1        | 9.4E-03 |

|      |                                 |                         |                           |         |
|------|---------------------------------|-------------------------|---------------------------|---------|
| 1344 | DUSP18                          | 150290                  | A_24_P83118_riset1        | 9.4E-03 |
| 1345 | GZMA                            | 3001                    | MIL_PPPID394308024_riset1 | 9.4E-03 |
| 1346 | RUNDC2A;R<br>UNDC2B;RU<br>NDC2C | 400509;440352;8412<br>7 | A_32_P66020_riset1        | 9.5E-03 |
| 1347 | RBBP9                           | 10741                   | A_23_P257532_riset1       | 9.5E-03 |
| 1348 | RENBP                           | 5973                    | A_23_P137155_riset1       | 9.5E-03 |
| 1349 | RAI16                           | 64760                   | A_23_P157620_riset1       | 9.5E-03 |
| 1350 | SLC9A10                         | 285335                  | A_24_P24770_riset1        | 9.5E-03 |
| 1351 | AK096134                        | -                       | A_24_P715602_riset1       | 9.5E-03 |
| 1352 | DHRS13                          | 147015                  | A_23_P66719_riset1        | 9.5E-03 |
| 1353 | TEGT                            | 7009                    | A_24_P355876_riset1       | 9.5E-03 |
| 1354 | SEC23IP                         | 11196                   | A_23_P202602_riset1       | 9.6E-03 |
| 1355 | EIF2C3                          | 192669                  | MIL_PPPID394307836_riset1 | 9.6E-03 |
| 1356 | LARS2                           | 23395                   | A_23_P212397_riset1       | 9.6E-03 |
| 1357 | FLJ13412                        | -                       | A_32_P96188_riset2        | 9.6E-03 |
| 1358 | SERPINC1                        | 462                     | A_23_P114626_riset1       | 9.6E-03 |
| 1359 | LTA4H                           | 4048                    | MIL_PPPID402610596_riset2 | 9.6E-03 |
| 1360 | CHEK1                           | 1111                    | A_23_P116123_riset1       | 9.7E-03 |
| 1361 | LOC201175                       | 201175                  | A_23_P401626_riset1       | 9.7E-03 |
| 1362 | USP24                           | 23358                   | USP24_riset2              | 9.7E-03 |
| 1363 | TIMP4                           | 7079                    | A_23_P69208_riset1        | 9.7E-03 |
| 1364 | PPFIBP1                         | 8496                    | A_23_P47867_riset1        | 9.8E-03 |
| 1365 | CNN3                            | 1266                    | A_23_P138168_riset1       | 9.8E-03 |
| 1366 | CCND2                           | 894                     | A_24_P278747_riset1       | 9.8E-03 |
| 1367 | IQCB1                           | 9657                    | A_23_P84140_riset1        | 9.8E-03 |
| 1368 | NEK1                            | 4750                    | A_23_P124427_riset1       | 9.8E-03 |
| 1369 | HCK                             | 3055                    | HCK_riset2                | 9.9E-03 |
| 1370 | FAM125B                         | 89853                   | A_24_P941557_riset1       | 9.9E-03 |
| 1371 | LONRF1                          | 91694                   | A_32_P194032_riset1       | 9.9E-03 |
| 1372 | KRT18                           | 3875                    | A_23_P99320_riset1        | 9.9E-03 |
| 1373 | TMEM126B                        | 55863                   | A_23_P2124_riset1         | 9.9E-03 |
| 1374 | PLB1;TDRD7                      | 151056;23424            | A_24_P110926_riset1       | 9.9E-03 |
| 1375 | LYRM7                           | 90624                   | A_32_P18159_riset1        | 1.0E-02 |
| 1376 | FKBP15                          | 23307                   | A_32_P224149_riset1       | 1.0E-02 |
| 1377 | CES4                            | 51716                   | A_23_P374892_riset1       | 1.0E-02 |

|      |       |      |                    |         |
|------|-------|------|--------------------|---------|
| 1378 | PDE6H | 5149 | A_23_P64913_riset1 | 1.0E-02 |
|------|-------|------|--------------------|---------|

**Supplemental Table 4. List of probes with significant differential expression common to both *training* and *test sets*.** List of 174 probes common to both *training* and *test sets* identified to have significant differential expression by study groups following four-class analysis. Ranked on p values by Kruskal-Wallis test with adjustment for False Discovery Rate (FDR) at 1%.

| <b>Common gene list</b>         |                  |                      |                           |                             |
|---------------------------------|------------------|----------------------|---------------------------|-----------------------------|
| <b><i>Training set Rank</i></b> | <b>Gene Name</b> | <b>EntrezGene ID</b> | <b>Probe ID</b>           | <b><i>Test set Rank</i></b> |
| 1                               | CD79B            | 974                  | A_23_P207201_riset1       | 12                          |
| 2                               | TCL1A            | 8115                 | A_23_P357717_riset1       | 1                           |
| 3                               | HS3ST1           | 9957                 | A_23_P121657_riset1       | 3                           |
| 4                               | TCL1A            | 8115                 | MIL_PPPID394307780_riset1 | 2                           |
| 5                               | SH2D1B           | 117157               | A_32_P324533_riset1       | 352                         |
| 6                               | MS4A1            | 931                  | MIL_PPPID394453510_riset1 | 57                          |
| 7                               | TLR5             | 7100                 | A_23_P85903_riset1        | 97                          |
| 8                               | FCLR1            | 115350               | A_32_P71876_riset1        | 52                          |
| 9                               | PNOC             | 5368                 | A_23_P253321_riset1       | 53                          |
| 10                              | SLC8A1           | 6546                 | A_32_P147078_riset1       | 736                         |
| 11                              | FCRL2            | 79368                | A_23_P160751_riset1       | 43                          |
| 12                              | BLK              | 640                  | BLK_riset2                | 111                         |
| 13                              | PCDH9            | 5101                 | A_24_P187218_riset1       | 9                           |
| 14                              | CD200            | 4345                 | A_23_P121480_riset1       | 4                           |
| 15                              | THC2317432       | -                    | A_32_P124728_riset1       | 10                          |
| 16                              | BCL11A           | 53335                | A_24_P402588_riset1       | 251                         |
| 17                              | TSPAN3           | 10099                | A_23_P14804_riset1        | 80                          |
| 18                              | CD79A            | 973                  | CD79A_riset2_piqor        | 29                          |
| 19                              | CASP5            | 838                  | CASP5_riset2              | 493                         |
| 20                              | FCRL5            | 83416                | A_23_P201211_riset1       | 301                         |
| 21                              | IL1RL2           | 8808                 | A_23_P56604_riset1        | 930                         |
| 22                              | EBI2             | 1880                 | A_23_P25566_riset1        | 82                          |
| 23                              | BLNK             | 29760                | A_24_P64344_riset1        | 20                          |
| 25                              | RNF24            | 11237                | A_23_P120533_riset1       | 784                         |
| 26                              | DIMT1L           | 27292                | A_23_P58529_riset1        | 494                         |
| 27                              | EPO              | 2056                 | A_23_P145664_riset1       | 807                         |
| 28                              | ZAK              | 51776                | A_23_P318300_riset1       | 244                         |
| 29                              | CD40             | 958                  | A_23_P57036_riset1        | 205                         |
| 31                              | IGHM             | 3507                 | A_24_P417352_riset1       | 13                          |
| 33                              | SH2D1B           | 117157               | A_32_P324533_riset1       | 329                         |
| 34                              | AKR1C3           | 8644                 | A_23_P138543_riset1       | 106                         |
| 35                              | CASD1            | 64921                | A_24_P69379_riset1        | 163                         |

|     |            |        |                           |      |
|-----|------------|--------|---------------------------|------|
| 36  | FCRLA      | 84824  | A_23_P46037_riset1        | 56   |
| 37  | BTLA       | 151888 | MIL_PPPID399200354_riset1 | 28   |
| 39  | CLCN5      | 1184   | CLCN5_riset2              | 959  |
| 40  | LHFPL2     | 10184  | A_23_P255104_riset1       | 65   |
| 41  | ARG1       | 383    | A_23_P111321_riset1       | 360  |
| 42  | ANXA3      | 306    | A_23_P121716_riset1       | 231  |
| 43  | HLA-DOA    | 3111   | A_32_P356316_riset1       | 74   |
| 44  | KLRF1      | 51348  | A_32_P158966_riset1       | 815  |
| 45  | CD22       | 933    | CD22_riset2               | 121  |
| 47  | PLXDC2     | 84898  | A_32_P187518_rev_riset1   | 60   |
| 48  | BCL7A      | 605    | A_24_P203056_riset1       | 59   |
| 50  | ADAMTS4    | 9507   | A_23_P360754_riset1       | 5    |
| 54  | HLA-DOB    | 3112   | A_23_P30736_riset1        | 128  |
| 55  | CD163      | 9332   | A_23_P33723_riset1        | 637  |
| 56  | FLJ32866   | 731424 | MIL_PPPID400032869_riset1 | 437  |
| 57  | EBF1       | 1879   | A_24_P156501_riset1       | 102  |
| 58  | GPR92      | 57121  | A_23_P204375_riset1       | 1182 |
| 60  | PEX3       | 8504   | A_23_P259328_riset1       | 413  |
| 62  | CD83       | 9308   | A_23_P70670_riset1        | 123  |
| 63  | GPR120     | 338557 | A_24_P129588_riset1       | 833  |
| 66  | ASPH       | 444    | A_24_P295245_riset1       | 214  |
| 67  | MCTP1      | 79772  | A_24_P212481_riset1       | 19   |
| 68  | SORT1      | 6272   | A_24_P325520_riset1       | 83   |
| 70  | TMEM49     | 81671  | A_32_P9753_riset1         | 58   |
| 71  | MBOAT2     | 129642 | A_23_P370635_riset1       | 110  |
| 75  | SIRPA      | 140885 | A_24_P267619_riset1       | 778  |
| 76  | PDHX       | 8050   | A_23_P36266_riset1        | 196  |
| 77  | STAT3      | 6774   | A_23_P100790_riset1       | 1250 |
| 78  | SLPI       | 6590   | A_23_P91230_riset1        | 389  |
| 81  | RET        | 5979   | MIL_PPPID397416187_riset1 | 1074 |
| 82  | GPR84      | 53831  | A_23_P25155_riset1        | 125  |
| 83  | ITK        | 3702   | ITK_riset2                | 99   |
| 84  | AIM2       | 9447   | A_32_P44394_riset1        | 218  |
| 87  | TNFAIP8    | 25816  | TNFAIP8_riset2            | 132  |
| 91  | KCNJ2      | 3759   | A_23_P329261_riset1       | 112  |
| 92  | BNIP3      | 664    | A_23_P138635_riset1       | 85   |
| 93  | GALNT14    | 79623  | A_23_P67847_riset1        | 333  |
| 94  | TGDS       | 23483  | A_23_P65217_riset1        | 78   |
| 96  | DNAJC19    | 131118 | A_23_P121396_riset1       | 638  |
| 100 | THC2380706 | -      | A_24_P214556_riset1       | 714  |
| 101 | C1ORF19    | 116461 | A_23_P104022_riset1       | 891  |
| 103 | LITAF      | 9516   | A_23_P3532_riset1         | 1226 |
| 106 | SLC25A37   | 51312  | A_32_P197026_riset1       | 504  |
| 108 | EDG1       | 1901   | A_23_P160117_riset1       | 109  |

|     |          |        |                           |      |
|-----|----------|--------|---------------------------|------|
| 110 | TNFAIP6  | 7130   | A_23_P165624_riset1       | 496  |
| 112 | TMTC3    | 160418 | A_24_P944222_riset1       | 331  |
| 113 | MNAT1    | 4331   | A_23_P32615_riset1        | 541  |
| 114 | ZNF181   | 339318 | A_23_P50735_riset1        | 770  |
| 115 | MYC      | 4609   | MIL_PPPID404158649_riset2 | 1072 |
| 116 | CLEC5A   | 23601  | A_23_P71165_riset1        | 607  |
| 117 | GPX7     | 2882   | A_23_P73972_riset1        | 274  |
| 119 | PPIL3    | 53938  | A_23_P28213_riset1        | 131  |
| 120 | THUMPD1  | 55623  | A_24_P90878_riset1        | 317  |
| 121 | MAD2L1   | 4085   | A_23_P92441_riset1        | 300  |
| 122 | SPTLC2   | 9517   | A_24_P150486_riset1       | 66   |
| 123 | THAP2    | 83591  | A_24_P350437_riset1       | 310  |
| 125 | C8ORF60  | 619426 | A_24_P59387_riset1        | 409  |
| 126 | MXD1     | 4084   | A_23_P408094_riset1       | 732  |
| 130 | SEPT9    | 10801  | A_23_P106973_riset1       | 248  |
| 131 | PDCD6    | 10016  | A_23_P218997_riset1       | 433  |
| 133 | IL10RA   | 3587   | A_24_P107303_riset1       | 266  |
| 134 | MAGEH1   | 28986  | A_23_P34144_riset1        | 98   |
| 136 | SLC25A37 | 51312  | A_32_P197026_riset1       | 119  |
| 137 | CARD6    | 84674  | A_23_P41854_riset1        | 926  |
| 138 | ZFP2     | 80108  | A_23_P133359_riset1       | 1075 |
| 139 | PTMA     | 5757   | A_32_P746413_riset1       | 392  |
| 140 | BACE2    | 25825  | A_23_P154875_riset1       | 735  |
| 141 | CHST2    | 9435   | CHST2_riset2_piqor        | 359  |
| 143 | BCKDHB   | 594    | A_24_P239664_riset1       | 335  |
| 144 | MTX2     | 10651  | A_23_P120335_riset1       | 716  |
| 148 | CD7      | 924    | A_23_P118862_riset1       | 804  |
| 149 | ACOT2    | 10965  | A_23_P3111_riset1         | 577  |
| 153 | CD40LG   | 959    | A_23_P62220_riset1        | 275  |
| 155 | FANK1    | 92565  | A_23_P115785_riset1       | 48   |
| 156 | DNMT1    | 1786   | A_23_P27490_riset1        | 240  |
| 157 | AK3L1    | 205    | MIL_PPPID394453462_riset1 | 1122 |
| 158 | RFC4     | 5984   | A_23_P18196_riset1        | 87   |
| 159 | BTG1     | 694    | A_23_P87560_riset1        | 17   |
| 160 | SPON1    | 10418  | A_32_P133072_riset1       | 103  |
| 162 | ATL3     | 25923  | A_23_P105028_riset1       | 51   |
| 165 | AFF3     | 3899   | A_23_P373464_riset1       | 690  |
| 166 | MCEE     | 84693  | A_23_P56654_riset1        | 1013 |
| 167 | NLRC4    | 58484  | A_23_P119835_riset1       | 779  |
| 169 | DTX1     | 1840   | A_24_P290751_riset1       | 115  |
| 170 | TRIM4    | 89122  | A_23_P500601_riset1       | 227  |
| 171 | TMEM106B | 54664  | A_32_P353072_riset1       | 293  |
| 176 | FCAR     | 2204   | A_24_P348265_riset1       | 241  |
| 178 | VCPIP1   | 80124  | A_32_P74366_riset1        | 509  |



|     |              |            |                           |      |
|-----|--------------|------------|---------------------------|------|
| 179 | SATB1        | 6304       | SATB1_riset2              | 338  |
| 181 | PDLIM7       | 9260       | A_24_P41882_riset1        | 162  |
| 184 | IL23A        | 51561      | A_23_P76078_riset1        | 152  |
| 187 | XBP1         | 7494       | A_23_P120845_riset1       | 443  |
| 188 | SOCS3        | 9021       | A_23_P207058_riset1       | 831  |
| 189 | SFRS10       | 6434       | A_24_P145911_riset1       | 209  |
| 190 | TNFSF10      | 8743       | A_23_P121253_riset1       | 1029 |
| 195 | RNASE2       | 6036       | A_23_P151638_riset1       | 178  |
| 196 | MAP2K6       | 5608       | A_23_P207445_riset1       | 1048 |
| 198 | LYRM7        | 90624      | A_32_P18159_riset1        | 1375 |
| 199 | AK124263     | -          | A_24_P538708_riset1       | 911  |
| 200 | MYT1;PCMTD2  | 4661;55251 | A_23_P210829_riset1       | 995  |
| 201 | CD96         | 10225      | A_23_P44154_riset1        | 533  |
| 203 | PCGF6        | 84108      | A_23_P115703_riset1       | 454  |
| 204 | IGKV3-20     | 28912      | A_23_P21800_riset1        | 11   |
| 205 | CARD11       | 84433      | A_23_P82324_riset1        | 502  |
| 206 | IFT80        | 57560      | A_23_P316150_riset1       | 375  |
| 207 | SLAMF1       | 6504       | SLAMF1_riset2             | 62   |
| 208 | SIP1         | 8487       | A_23_P88194_riset1        | 516  |
| 209 | FAIM         | 55179      | A_23_P253932_riset1       | 590  |
| 210 | NEK1         | 4750       | A_23_P124427_riset1       | 1368 |
| 211 | IL1R2        | 7850       | A_23_P79398_riset1        | 545  |
| 212 | HOXB2        | 3212       | A_23_P107283_riset1       | 142  |
| 214 | FLT3         | 2322       | MIL_PPPID394308044_riset1 | 345  |
| 216 | SLC26A8      | 116369     | A_23_P30950_riset1        | 264  |
| 219 | FCGR1A       | 2209       | A_23_P63395_riset1        | 318  |
| 220 | LGALS8       | 3964       | LGALS8_riset2             | 1102 |
| 222 | CLIC3        | 9022       | A_23_P254654_riset1       | 1317 |
| 223 | BEX4         | 56271      | A_23_P114391_riset1       | 176  |
| 224 | SLC11A1      | 6556       | A_32_P436132_riset1       | 1086 |
| 225 | BMP2K        | 55589      | A_24_P86240_riset1        | 27   |
| 226 | SFT2D3       | 84826      | A_23_P5566_riset1         | 370  |
| 227 | C5ORF28      | 64417      | A_23_P121875_riset1       | 400  |
| 230 | PHLDB2       | 90102      | A_24_P240166_riset1       | 1092 |
| 231 | A_23_P399604 | -          | A_23_P399604_riset1       | 401  |
| 232 | GTL3         | 29105      | A_23_P3514_riset1         | 616  |
| 233 | ITSN2        | 50618      | MIL_PPPID399200362_riset1 | 733  |
| 234 | ARHGEF12     | 23365      | A_24_P175783_riset1       | 546  |
| 236 | MUC8         | 4590       | MUC8_riset2_piqor         | 1198 |
| 238 | FLJ22662     | 79887      | A_23_P87709_riset1        | 267  |
| 239 | APEX1        | 328        | A_23_P151649_riset1       | 585  |
| 240 | RPS4Y1       | 6192       | A_23_P259314_riset1       | 1132 |
| 241 | LCK          | 3932       | LCK_riset2                | 207  |
| 242 | LOC642897    | 642897     | A_24_P84401_riset1        | 933  |

|     |         |        |                     |     |
|-----|---------|--------|---------------------|-----|
| 244 | SLC26A8 | 116369 | A_23_P30950_riset1  | 161 |
| 246 | CD247   | 919    | A_23_P34676_riset1  | 16  |
| 247 | UPF3A   | 65110  | A_32_P202778_riset1 | 282 |
| 248 | RGS1    | 5996   | A_23_P97141_riset1  | 22  |
| 249 | RBM3    | 5935   | RBM3_riset2         | 619 |
| 250 | POLR3H  | 171568 | A_24_P322847_riset1 | 744 |
| 251 | RHOH    | 399    | A_23_P58132_riset1  | 49  |
| 254 | LETMD1  | 25875  | A_23_P117037_riset1 | 137 |
| 257 | LDHB    | 3945   | A_23_P53476_riset1  | 77  |
| 259 | TRA@    | 6955   | A_23_P258504_riset1 | 312 |

**Supplemental Table 5. Median of log-fold change in expression of top 11 ranked probes with significant differential expression in patient groups of the *training set*.** Median of log-fold change in expression (relative to median of all samples) of differentially expressed probes detected in patient groups of the *training set*, ranked on 1% FDR. Plots showing the fold expression for each patient group of the *training* and *test sets*, for all genes detected to be significantly differentially expressed available in online material. Stable; combined groups s-CNI, s-nCNI, s-LP.

| <b>Rank</b> | <b>Probe</b> | <b>Entrez Gene ID</b> | <b>Riset Probe ID</b>     | <b>HC</b> | <b>Tol-DF</b> | <b>Stable</b> | <b>CR</b> |
|-------------|--------------|-----------------------|---------------------------|-----------|---------------|---------------|-----------|
| 1           | CD79B        | 974                   | A_23_P207201_riset1       | 1.024     | 0.618         | -0.2375       | -0.319    |
| 2           | TCL1A        | 8115                  | A_23_P357717_riset1       | 1.6525    | 1.062         | -0.41         | 0.0965    |
| 3           | HS3ST1       | 9957                  | A_23_P121657_riset1       | 1.161     | 0.995         | -0.8895       | -1.8945   |
| 4           | TCL1A        | 8115                  | MIL_PPPID394307780_riset1 | 1.645     | 0.994         | -0.38         | 0.121     |
| 5           | SH2D1B       | 117157                | A_32_P324533_riset1       | 1.085     | 0.76          | -0.198        | -0.0445   |
| 6           | MS4A1        | 931                   | MIL_PPPID394453510_riset1 | 0.9025    | 0.763         | -0.2725       | -0.108    |
| 7           | TLR5         | 7100                  | A_23_P85903_riset1        | -0.7895   | -0.341        | 0.1265        | 0.36      |
| 8           | FCRL1        | 115350                | A_32_P71876_riset1        | 1.1145    | 0.517         | -1.2275       | -0.9745   |
| 9           | PNOC         | 5368                  | A_23_P253321_riset1       | 0.633     | 0.585         | -0.2725       | 0.0465    |
| 10          | SLC8A1       | 6546                  | A_32_P147078_riset1       | -0.591    | -0.451        | 0.04          | 0.4665    |
| 11          | FCRL2        | 79368                 | A_23_P160751_riset1       | -0.845    | -0.9725       | 1.067         | 0.554     |

**Supplemental Table 6. Annotation enrichment of genes with significant differential expression common to the *training* and *test sets*.** Listed genes are those with significant differential expression which are common to both the training and test sets, and identified to be significantly associated with the listed annotated pathways. Shaded columns indicate B cell related pathways.

| Annotation   | B cell   | IG domain | activated T cell | Phosphorylation of CD3 and TCR zeta chains | Generation of second messenger molecules | protein-tyrosine kinase | TCR signalling | Downregulated by B-Cell-Receptor Pathway | Lymphocyte | Hematopoietic cell lineage | Chr 1q23 |
|--------------|----------|-----------|------------------|--------------------------------------------|------------------------------------------|-------------------------|----------------|------------------------------------------|------------|----------------------------|----------|
| Significance | 5.00E-06 | 9.50E-05  | 4.42E-04         | 6.90E-04                                   | 2.01E-03                                 | 1.17E-02                | 1.87E-02       | 2.59E-02                                 | 2.71E-02   | 2.96E-02                   | 4.49E-02 |
| Count        | 15       | 21        | 14               | 5                                          | 6                                        | 5                       | 7              | 10                                       | 5          | 5                          | 7        |
| Name         |          |           |                  |                                            |                                          |                         |                |                                          |            |                            |          |
| CD7          | X        | X         | X                |                                            |                                          |                         |                |                                          | X          | X                          |          |
| TNFSF10      |          |           | X                |                                            |                                          |                         |                | X                                        |            |                            |          |
| CD200        | X        | X         | X                |                                            |                                          |                         |                |                                          |            |                            |          |
| RNASE2       |          | X         |                  |                                            |                                          |                         |                |                                          |            |                            |          |
| FCRL2        |          | X         |                  |                                            |                                          |                         |                |                                          |            |                            | X        |
| FCRL5        | X        | X         |                  |                                            |                                          |                         |                |                                          |            |                            | X        |
| CD79B        | X        | X         |                  |                                            |                                          |                         |                | X                                        |            |                            |          |
| IGKV3-20     |          | X         |                  |                                            |                                          |                         |                |                                          |            |                            |          |
| HLA-DOB      |          | X         |                  | X                                          | X                                        |                         | X              |                                          |            |                            |          |
| CD247        |          |           | X                | X                                          | X                                        |                         | X              |                                          | X          |                            |          |
| SH2D1B       |          |           |                  |                                            |                                          |                         |                |                                          |            |                            | X        |
| TCL1A        | X        |           |                  |                                            |                                          |                         |                |                                          |            |                            |          |
| ADAMTS4      |          |           |                  |                                            |                                          |                         |                |                                          |            |                            | X        |
| CD96         | X        | X         | X                |                                            |                                          |                         |                |                                          |            |                            |          |
| FCRLA        |          | X         |                  |                                            |                                          |                         |                |                                          |            |                            | X        |
| IL1RL2       |          | X         |                  |                                            |                                          |                         |                |                                          |            |                            |          |
| CD40         | X        |           | X                |                                            |                                          |                         |                | X                                        |            |                            |          |
| CD40LG       |          |           | X                |                                            |                                          |                         |                |                                          |            |                            |          |
| FCGR1A       |          | X         | X                |                                            |                                          |                         |                |                                          |            | X                          |          |
| CD83         | X        | X         | X                |                                            |                                          |                         |                |                                          | X          |                            |          |
| IL1R2        |          | X         |                  |                                            |                                          |                         |                | X                                        |            | X                          |          |
| CARD11       |          |           |                  |                                            |                                          |                         | X              |                                          |            |                            |          |
| BTG1         |          |           |                  |                                            |                                          |                         |                | X                                        |            |                            |          |

|         |   |   |   |   |   |   |   |   |   |   |   |
|---------|---|---|---|---|---|---|---|---|---|---|---|
| MAD2L1  |   |   |   |   |   |   |   | X |   |   |   |
| SIRPA   |   | X | X |   |   |   |   |   |   |   |   |
| FCAR    | X | X | X |   |   |   |   |   |   |   |   |
| HLA-DOA |   | X |   | X | X |   | X |   |   |   |   |
| AIM2    |   |   |   |   |   |   |   |   |   |   | X |
| BLK     |   |   |   | X | X | X | X |   |   |   |   |
| CD22    | X | X |   |   |   |   |   | X |   | X |   |
| CD79A   | X | X |   |   |   |   |   | X | X |   |   |
| ITK     |   |   |   |   | X | X | X |   |   |   |   |
| LCK     |   |   |   | X | X | X | X | X |   |   |   |
| FLT3    | X | X |   |   |   | X |   |   |   |   |   |
| MS4A1   | X |   | X |   |   |   |   |   | X | X |   |
| RET     |   |   |   |   |   | X |   |   |   |   |   |
| BTLA    | X | X | X |   |   |   |   |   |   |   |   |
| MYC     |   |   |   |   |   |   |   | X |   |   |   |
| SLAMF1  | X |   | X |   |   |   |   |   |   |   | X |
